# Supplementary material for: Metagenomics Analysis Reveals an Extraordinary Inner Bacterial Diversity in Anisakids (Nematoda: Anisakidae) L3 Larvae
Source: MDPI journal article supplement (doi:10.3390/microorganisms9051088), 2021-05-19
Supplement: s1 [file s1]

| OTU     | Number                                       | 100_S55_1.fastq | 101P_S57 | 101S_S56 | 102A_S58 | 104_S59 | 105PS_S111                                                                                                                                                                                                                                                                                                                                                                                                                                                                                                                                                                                               | 107_S60   | 108_S61  | 109_S62    | 110_S63    | 115_S64    | 116_S65  | 117_S66    |            |        |         |          |         |         |        |         |      |      |     |                                                                                                                                                                              |     |     |      |  |  |  |  |  |  |  |  |  |  |  |  |  |  |  |
|---------|----------------------------------------------|-----------------|----------|----------|----------|---------|----------------------------------------------------------------------------------------------------------------------------------------------------------------------------------------------------------------------------------------------------------------------------------------------------------------------------------------------------------------------------------------------------------------------------------------------------------------------------------------------------------------------------------------------------------------------------------------------------------|-----------|----------|------------|------------|------------|----------|------------|------------|--------|---------|----------|---------|---------|--------|---------|------|------|-----|------------------------------------------------------------------------------------------------------------------------------------------------------------------------------|-----|-----|------|--|--|--|--|--|--|--|--|--|--|--|--|--|--|--|
|         | 118H_S67                                     | 118S_S68        | 119_S69  | 120_S70  | 121_S71  | 125_S72 | 126_S73                                                                                                                                                                                                                                                                                                                                                                                                                                                                                                                                                                                                  | 127_S74   | 128S_S75 | 131PS_S108 | 133PS_S109 | 135PS_S110 | 136_S76  | 138_S77    |            |        |         |          |         |         |        |         |      |      |     |                                                                                                                                                                              |     |     |      |  |  |  |  |  |  |  |  |  |  |  |  |  |  |  |
|         | 139_S78                                      | 140_S79         | 142_S81  | 143_S82  | 144_S83  | 145_S84 | 146P_S85                                                                                                                                                                                                                                                                                                                                                                                                                                                                                                                                                                                                 | 146S_S86  | 147_S87  | 148_S88    | 149_S89    | 150_S90    | 151_S91  | 152_S92    |            |        |         |          |         |         |        |         |      |      |     |                                                                                                                                                                              |     |     |      |  |  |  |  |  |  |  |  |  |  |  |  |  |  |  |
|         | 153_S93                                      | 154_S94         | 155_S95  | 156_S96  | 157_S97  | 159_S98 | 160P_S99                                                                                                                                                                                                                                                                                                                                                                                                                                                                                                                                                                                                 | 160S_S100 | 161_S101 | 162_S102   | 166_S103   | 172_S104   | 187_S105 | 188PS_S112 |            |        |         |          |         |         |        |         |      |      |     |                                                                                                                                                                              |     |     |      |  |  |  |  |  |  |  |  |  |  |  |  |  |  |  |
|         | 189P_S106                                    | 190S_S107       | 20_S1    | 22_S2    | 23_S3    | 24_S4   | 28_S5                                                                                                                                                                                                                                                                                                                                                                                                                                                                                                                                                                                                    | 31_S6     | 32_S7    | 33_S8      | 36_S9      | 38_S10     | 40_S11   | 42_S12     | 43_S13     | 44_S80 | 45p_S14 | 45s_S15  | 47_S16  | 48a_S17 | 56_S18 | 57p_S20 |      |      |     |                                                                                                                                                                              |     |     |      |  |  |  |  |  |  |  |  |  |  |  |  |  |  |  |
|         | 57s_S19                                      | 60_S21          | 62_S22   | 64_S23   | 66_S24   | 68p_S26 | 68s_S25                                                                                                                                                                                                                                                                                                                                                                                                                                                                                                                                                                                                  | 69_S27    | 70_S28   | 71_S29     | 72_S30     | 73_S31     | 74_S32   | 75_S33     | 76B_S34    | 77_S35 | 78_S36  | 79_S113  | 80S_S37 | 81_S38  | 82_S39 | 83_S40  |      |      |     |                                                                                                                                                                              |     |     |      |  |  |  |  |  |  |  |  |  |  |  |  |  |  |  |
|         | 84A_S41                                      | 85_S42          | 86A_S43  | 88_S44   | 90_S45   | 91A_S46 | 92_S47                                                                                                                                                                                                                                                                                                                                                                                                                                                                                                                                                                                                   | 93_S48    | 94_S49   | 95_S50     | 96_S51     | 97_S52     | 98_S53   | 99S_S54    | repSeqName | repSeq | OTUCon  | Taxonomy |         |         |        |         |      |      |     |                                                                                                                                                                              |     |     |      |  |  |  |  |  |  |  |  |  |  |  |  |  |  |  |
| Otu0001 | 3866                                         | 239             | 731      | 2181     | 1268     | 938     | 1323                                                                                                                                                                                                                                                                                                                                                                                                                                                                                                                                                                                                     | 1513      | 273      | 439        | 0          | 0          | 7        | 388        | 94         | 7      | 5       | 19       | 33      | 78      | 323    | 43      | 708  | 0    | 28  | 236                                                                                                                                                                          | 60  | 213 |      |  |  |  |  |  |  |  |  |  |  |  |  |  |  |  |
|         | 668                                          | 6012            | 13180    | 11215    | 14855    | 11753   | 11939                                                                                                                                                                                                                                                                                                                                                                                                                                                                                                                                                                                                    | 3799      | 355      | 1148       | 11680      | 3636       | 698      | 329        | 2816       | 503    | 197     | 1264     | 16      | 339     | 1487   | 20      | 318  | 932  | 293 | 159                                                                                                                                                                          | 45  | 137 | 3464 |  |  |  |  |  |  |  |  |  |  |  |  |  |  |  |
|         | 2661                                         | 331             | 9320     | 292      | 2211     | 2509    | 961                                                                                                                                                                                                                                                                                                                                                                                                                                                                                                                                                                                                      | 344       | 819      | 1295       | 1766       | 54         | 77       | 750        | 477        | 226    | 7984    | 1113     | 1467    | 4222    | 3960   | 179     | 40   | 384  | 294 | 1402                                                                                                                                                                         | 241 | 128 | 177  |  |  |  |  |  |  |  |  |  |  |  |  |  |  |  |
|         | 358                                          | 356             | 629      | 2463     | 288      | 91      | 29                                                                                                                                                                                                                                                                                                                                                                                                                                                                                                                                                                                                       | 41        | 2        | 679        | 16         | 43         | 21       | 109        | 0          | 1477   | 5585    | 2860     | 3370    | 148     | 585    | 570     | 866  | 31   | 232 | 298                                                                                                                                                                          | 200 |     |      |  |  |  |  |  |  |  |  |  |  |  |  |  |  |  |
|         | M02255_77_000000000-ADUT3_1_1101_13422_10668 |                 |          |          |          |         | T----AC--GG-AG-GGA-----GCT-A-G-----C--G--T---T--GT-T-CGG-AA-----TT-A--C-T-GG-GC-----GT--A----AA-GC-GC-AC-----G-TA-G-G-C-G-----G--C-TT-T-G-T-----AA----G-T-T-A-----G-A-G--G-TG--A-AA-GC--C-T-GG-A-G-----CT-C-AA-----C-T-C-C-A-G-A--A-T---T-G--C-C---T-T-----T-AA-G-A--C-----T--G-C--AT--C-G-C---T-T-G-A-A-T--C---C-AG----GA-G-A-----G-G-T-G--AG-T-----GG--A--ATT---C-C-G-A-GT--GT-A-G-AG-GT--G---A--A-A---TT-C-GT-AG--AT-A-TT--C-G--G-A-A-G-A-AC-A-CC---AG--T--G--GC-GAA-G--G-C--G-----G--C-T-C-A---CTG--G--AC-T-G-----G-T--A-T-T-GA--CG-C-T-G--A-GG--T-G-CG-A--AA-G-C---G-TG--GG-G--AG-C-A-AA-----CA--GG |           |          |            |            |            |          |            |            |        |         |          |         |         |        |         |      |      |     | Bacteria(100);Proteobacteria(100);Alphaproteobacteria(100);Sphingomonadales(100);Sphingomonadaceae(91);Sphingomonas(89);unclassified(89);unclassified(89);unclassified(89);  |     |     |      |  |  |  |  |  |  |  |  |  |  |  |  |  |  |  |
| Otu0002 | 0                                            | 0               | 0        | 6        | 0        | 0       | 0                                                                                                                                                                                                                                                                                                                                                                                                                                                                                                                                                                                                        | 0         | 0        | 0          | 11         | 52         | 14       | 11         | 9          | 98     | 34      | 27       | 196     | 91      | 10     | 58      | 0    | 2    | 0   | 1                                                                                                                                                                            | 20  | 0   |      |  |  |  |  |  |  |  |  |  |  |  |  |  |  |  |
|         | 0                                            | 0               | 0        | 7        | 0        | 5       | 0                                                                                                                                                                                                                                                                                                                                                                                                                                                                                                                                                                                                        | 1         | 5        | 0          | 1          | 1          | 14       | 5          | 6          | 1      | 10      | 0        | 162     | 3       | 7      | 1       | 392  | 15   | 200 | 633                                                                                                                                                                          | 36  | 2   | 62   |  |  |  |  |  |  |  |  |  |  |  |  |  |  |  |
|         | 18                                           | 65              | 141      | 383      | 3        | 441     | 104                                                                                                                                                                                                                                                                                                                                                                                                                                                                                                                                                                                                      | 22        | 532      | 219        | 4          | 54         | 0        | 224        | 8          | 17     | 0       | 79       | 8       | 0       | 0      | 0       | 0    | 0    | 0   | 0                                                                                                                                                                            | 4   | 0   |      |  |  |  |  |  |  |  |  |  |  |  |  |  |  |  |
|         | 0                                            | 0               | 0        | 0        | 8        | 0       | 61                                                                                                                                                                                                                                                                                                                                                                                                                                                                                                                                                                                                       | 32        | 324      | 0          | 240        | 0          | 46       | 9          | 671        | 0      | 0       | 0        | 6       | 0       | 4      | 0       | 0    | 1    | 0   | 0                                                                                                                                                                            | 1   |     |      |  |  |  |  |  |  |  |  |  |  |  |  |  |  |  |
|         | M02255_77_000000000-ADUT3_1_1115_27848_17294 |                 |          |          |          |         | T---AA--GC-AC-CGG-----CTA-A-C-----T--A--C--G--TG-C-CAG-CA-----GC-C--G-C-GG-TA-----AT--A----CG-TA-GG-GT-----G-CA-A-G-C-G-----T--TAAT-C-G-G-----AA----T-TAC-T-----G-A-T--G-TG--A-AA-TC--C-C-CG-G-G-----CT-C-AA-----C-C-T-G-G-G-A--A-T---T-G--C-A--T-T-----G--GA-G-A--C-----T--G-C--AA--G-G-C---T-A-G-A-A-T--C---T-GG----CA-G-A-----G-G-G-G--GG-T-----AG--A--ATT---C-C-A-C-GT--GT-A-G-CA-GT--G---A--A-A---TG-C-GT-AG--AT-A-TG--T-G--G-A-G-G-A-AC-A-CC---GA--T--G--GC-GAA-G--G-C-A-----G--C-C-C-C---CTG--G--GT-C-A-----A-G--A-T-T-GA--CG-C-T-C--A-TG--C-A-CG-A--AA-G-C---G-TG--GG-G--AG-C-A-AA-----CA--GG    |           |          |            |            |            |          |            |            |        |         |          |         |         |        |         |      |      |     | Bacteria(100);Proteobacteria(100);Betaproteobacteria(100);Burkholderiales(99);Oxalobacteraceae(97);Janthinobacterium(81);unclassified(81);unclassified(81);unclassified(81); |     |     |      |  |  |  |  |  |  |  |  |  |  |  |  |  |  |  |
| Otu0003 | 750                                          | 499             | 463      | 1187     | 500      | 474     | 146                                                                                                                                                                                                                                                                                                                                                                                                                                                                                                                                                                                                      | 400       | 181      | 80         | 4          | 1          | 43       | 31         | 8          | 24     | 5       | 18       | 40      | 98      | 339    | 50      | 35   | 75   | 13  | 69                                                                                                                                                                           | 41  | 120 |      |  |  |  |  |  |  |  |  |  |  |  |  |  |  |  |
|         | 43                                           | 45              | 1512     | 4406     | 680      | 918     | 545                                                                                                                                                                                                                                                                                                                                                                                                                                                                                                                                                                                                      | 1158      | 1619     | 1069       | 1041       | 460        | 445      | 1784       | 541        | 922    | 430     | 522      | 39      | 428     | 900    | 19      | 90   | 1169 | 272 | 183                                                                                                                                                                          | 1   | 279 | 1769 |  |  |  |  |  |  |  |  |  |  |  |  |  |  |  |
|         | 27                                           | 33              | 20       | 4        | 5        | 4       | 4                                                                                                                                                                                                                                                                                                                                                                                                                                                                                                                                                                                                        | 0         | 22       | 1          | 4          | 2          | 59       | 43         | 71         | 281    | 221     | 1780     | 93      | 241     | 144    | 16      | 10   | 157  | 92  | 0                                                                                                                                                                            | 1   | 80  | 28   |  |  |  |  |  |  |  |  |  |  |  |  |  |  |  |
|         | 105                                          | 259             | 345      | 233      | 245      | 56      | 14                                                                                                                                                                                                                                                                                                                                                                                                                                                                                                                                                                                                       | 52        | 0        | 5          | 0          | 112        | 4        | 206        | 0          | 127    | 472     | 505      | 98      | 122     | 1011   | 441     | 271  | 34   | 455 | 1603                                                                                                                                                                         | 142 |     |      |  |  |  |  |  |  |  |  |  |  |  |  |  |  |  |
|         | M02255_77_000000000-ADUT3_1_1101_27555_6886  |                 |          |          |          |         | T---AC--GT-AG-GGC-----GCA-A-G-----C--G--T---T--GT-C-CGG-AA-----TT-A--T-T-GG-GC-----GT--A----AA-GA-GC-TC-----G-TA-G-G-C-G-----G--T-TT-G-T-C-----GC---G-T-C-T-----G-C-T--G-TG--A-AA-GC--C-C-GG-G-G-----CT-T-AA-----C-C-C-C-G-G-G--T-G---T-G--C-A--G--T-----G--GG-T-A--C-----G--G-G--CA--G-A-C---T-T-G-A-G-T-G---C-AG----TA-G-G-----G-G-A-G--AC-T-----GG--A--ATT---C-C-T-G-GT--GT-A-G-CG-GT--G---A--A-A---TG-C-GC-AG--AT-A-TC--A-G--G-A-G-G-A-AC-A-CC---GA--T--G--GC-GAA-G--G-C-A-----G--G-T-C-T---CTG--G--GC-T-G-----T-T--A-C-T--GA--CG-C-T-G--A-GG--A-G-CG-A--AA-G-C---A-TG--GG-G--AG-C-G-AA-----CA--GG   |           |          |            |            |            |          |            |            |        |         |          |         |         |        |         |      |      |     | Bacteria(100);Actinobacteria(100);Actinobacteria(100);Actinobacteridae(100);Actinomycetales(100);Micrococcineae(100);Micrococcaceae(99);unclassified(59);unclassified(59);   |     |     |      |  |  |  |  |  |  |  |  |  |  |  |  |  |  |  |
| Otu0004 | 0                                            | 35              | 75       | 97       | 0        | 120     | 48                                                                                                                                                                                                                                                                                                                                                                                                                                                                                                                                                                                                       | 143       | 0        | 72         | 3          | 14         | 0        | 11         | 11         | 0      | 5       | 0        | 7       | 25      | 72     | 12      | 77   | 4    | 6   | 11                                                                                                                                                                           | 0   | 23  |      |  |  |  |  |  |  |  |  |  |  |  |  |  |  |  |
|         | 0                                            | 2280            | 4839     | 2044     | 2658     | 3219    | 2733                                                                                                                                                                                                                                                                                                                                                                                                                                                                                                                                                                                                     | 487       | 149      | 317        | 2067       | 459        | 438      | 93         | 24         | 49     | 66      | 139      | 0       | 98      | 828    | 0       | 15   | 0    | 27  | 0                                                                                                                                                                            | 4   | 8   | 0    |  |  |  |  |  |  |  |  |  |  |  |  |  |  |  |
|         | 411                                          | 324             | 3265     | 104      | 211      | 95      | 216                                                                                                                                                                                                                                                                                                                                                                                                                                                                                                                                                                                                      | 124       | 137      | 67         | 452        | 69         | 56       | 89         | 268        | 223    | 704     | 895      | 15271   | 5379    | 2005   | 41      | 29   | 91   | 52  | 0                                                                                                                                                                            | 0   | 69  | 0    |  |  |  |  |  |  |  |  |  |  |  |  |  |  |  |
|         | 131                                          | 169             | 99       | 61       | 0        | 62      | 7                                                                                                                                                                                                                                                                                                                                                                                                                                                                                                                                                                                                        | 4         | 0        | 2038       | 9          | 93         | 17       | 75         | 0          | 2109   | 5908    | 4202     | 3735    | 673     | 613    | 1064    | 1044 | 0    | 47  | 0                                                                                                                                                                            | 1   |     |      |  |  |  |  |  |  |  |  |  |  |  |  |  |  |  |
|         | M02255_77_000000000-ADUT3_1_1103_12778_10339 |                 |          |          |          |         | T---AC--GA-AG-GGG-----GCT-A-G-----C--G--T---T--GC-T-CGG-AA-----TC-A--C-T--GG-GC-----GT--A----AA-GG-GT-GC-----G-TA-G-G-C-G-----G--G-TC-T-T-T-----AA----G-T-C-A-----G-G-G--G-TG--A-AA-TC--C-T-GG-A-G-----CT-C-AA-----C-T-C-C-A-G-A--A-C---T-G--C-C---T-T-----T-GA-T-A--C-----T--G-A--AG-A-T-C---T-T-G-A-G-T--T---C-GG----GA-G-A-----G-G-T-G--AG-T-----GG--A--ACT---G-C-G-A-GT--GT-A-G-AG-GT--G---A--A-A---TT-C-GT-AG--AT-A-TT--C-G--C-A-A-G-A-AC-A-CC---AG--T--G--GC-GAA-G--G-C--G-----G--C-T-C-A---CTG--G--CC-C-G-----A-T--A-C-T--GA--CG-C-T-G--A-GG--C-A-CG-A--AA-G-C---G-TG--GG-G--AG-C-A-AA-----CA--GG |           |          |            |            |            |          |            |            |        |         |          |         |         |        |         |      |      |     | Bacteria(100);Proteobacteria(100);Alphaproteobacteria(100);Rhizobiales(100);Bradyrhizobiaceae(100);Bradyrhizobium(95);unclassified(95);unclassified(95);unclassified(95);    |     |     |      |  |  |  |  |  |  |  |  |  |  |  |  |  |  |  |



|                                                                                                                                                                                                                            |      |     |     |     |    |     |      |     |     |     |       |      |     |     |     |     |     |     |     |     |     |     |      |     |      |     |     |      |
|----------------------------------------------------------------------------------------------------------------------------------------------------------------------------------------------------------------------------|------|-----|-----|-----|----|-----|------|-----|-----|-----|-------|------|-----|-----|-----|-----|-----|-----|-----|-----|-----|-----|------|-----|------|-----|-----|------|
| Otu0005                                                                                                                                                                                                                    | 0    | 0   | 0   | 28  | 0  | 85  | 1    | 1   | 0   | 0   | 14307 | 950  | 104 | 47  | 213 | 261 | 84  | 57  | 402 | 87  | 163 | 159 | 70   | 107 | 0    | 154 | 28  | 32   |
| 245                                                                                                                                                                                                                        | 1    | 26  | 0   | 0   | 12 | 8   | 46   | 0   | 16  | 540 | 23    | 0    | 0   | 20  | 0   | 50  | 97  | 682 | 50  | 213 | 58  | 1   | 0    | 0   | 0    | 1   | 43  | 0    |
| 379                                                                                                                                                                                                                        | 10   | 69  | 12  | 9   | 4  | 15  | 0    | 760 | 0   | 285 | 17    | 3    | 4   | 66  | 0   | 46  | 121 | 135 | 21  | 17  | 32  | 829 | 46   | 29  | 1    | 0   | 0   | 0    |
| 89                                                                                                                                                                                                                         | 0    | 64  | 34  | 0   | 98 | 217 | 249  | 243 | 397 | 10  | 0     | 128  | 117 | 0   | 38  | 83  | 0   | 439 | 19  | 42  | 19  | 19  | 35   | 8   | 0    | 0   |     |      |
| M02255_76_000000000-ADUNE_1_1112_23139_22017.....AC---T-AC-GT-----GCC-A-G-----C--A--G---C--CG-C-GGT-AA-----TA-C--G-T--AG-GT-----GG--C----AA-GC-G--TT-----G---T-C-C-G-----G--A-TC-T-T-T-----                                |      |     |     |     |    |     |      |     |     |     |       |      |     |     |     |     |     |     |     |     |     |     |      |     |      |     |     |      |
| AA---G-T-C-T-----G-A-T--G--TG--A-AA-GC--C-C-CC-G-G-----CT-C-AA-----C-C-G-G-G-G-A--G-----G-GT-C-A---T--T-----G--GA-A-A---C-----T-G-G--AG--A-A-C---T-T-G-A-G-T-G---C-AG-----AA-G-A-----G-G-A-G--AG-T-----GG--A--ATT---C-C-   |      |     |     |     |    |     |      |     |     |     |       |      |     |     |     |     |     |     |     |     |     |     |      |     |      |     |     |      |
| A-C-GT--GT-A-G-CG-GT--G---A--A---TG-C-GT-AG--AT-A-TG--T-G--G-A-G-G-A-AC-A-CC---AG--T--G--GC-GAA-G--G-C--G-----A--C-T-C-T---CTG--G--TC-T-G-----T-A---A-C-T-GA--CG-C-T-G--A-GG--C-T-CG-A--AA-G-C---G-TG--GG-G--              |      |     |     |     |    |     |      |     |     |     |       |      |     |     |     |     |     |     |     |     |     |     |      |     |      |     |     |      |
| AG-C-A-AA-----CA--GGBacteria(100);Firmicutes(100);Bacilli(100);unclassified(100);unclassified(100);unclassified(100);unclassified(100);unclassified(100);unclassified(100);                                                |      |     |     |     |    |     |      |     |     |     |       |      |     |     |     |     |     |     |     |     |     |     |      |     |      |     |     |      |
| Otu0006                                                                                                                                                                                                                    | 60   | 760 | 923 | 458 | 0  | 21  | 1427 | 562 | 871 | 232 | 5     | 0    | 0   | 16  | 5   | 1   | 0   | 3   | 2   | 2   | 51  | 3   | 830  | 13  | 8    | 9   | 10  | 3    |
| 0                                                                                                                                                                                                                          | 2    | 181 | 385 | 0   | 29 | 5   | 198  | 175 | 31  | 511 | 595   | 1168 | 630 | 786 | 54  | 112 | 90  | 0   | 103 | 193 | 0   | 326 | 1414 | 379 | 38   | 3   | 1   | 0    |
| 112                                                                                                                                                                                                                        | 11   | 0   | 3   | 43  | 8  | 15  | 0    | 4   | 39  | 8   | 6     | 8    | 18  | 84  | 94  | 87  | 34  | 326 | 80  | 29  | 68  | 21  | 1030 | 219 | 0    | 0   | 127 | 1090 |
| 0                                                                                                                                                                                                                          | 1030 | 875 | 39  | 153 | 66 | 19  | 18   | 0   | 125 | 9   | 113   | 13   | 97  | 0   | 116 | 96  | 586 | 8   | 224 | 1   | 37  | 134 | 37   | 944 | 1692 | 484 |     |      |
| M02255_77_000000000-ADUT3_1_2114_8513_21629G---AC---GG-GG-GGG-----GCA-A-G-----T--G--T---T--CT-T-CGG-AA-----TG-A--C-T--GG-GC-----GT--A----AA-GG-GC-AC-----G-TA-G-G-C-G-----G--T-GA-A-T-C-----                               |      |     |     |     |    |     |      |     |     |     |       |      |     |     |     |     |     |     |     |     |     |     |      |     |      |     |     |      |
| GG---G-T-T-G-----A-A-A--G--TG--A-AA---G-T-CG-C-C---AA-A-AA-----C-T-G-G-T-G-G-A-A---T-G--C-T---C--T-----C--GA-A-A---C-----C-A-A--TT--C-A-C---T-T-G-A-G-T-G---A-GA---CA-G-A-----G-G-A-G--AG-T-----GG--A--ATT---T-C-G-        |      |     |     |     |    |     |      |     |     |     |       |      |     |     |     |     |     |     |     |     |     |     |      |     |      |     |     |      |
| T-GT--GT-A-G-GG-GT--G---A--A---TC-C-GG-AG--AT-C-TA--C-G--A-A-G-G-A-AC-G-CC---AA--A--A--GC-GAA-G--G-C--A-----G--C-T-C-T---CTG--G--GT-C-C-----C-T---A-C-C--GA--CG-C-T-G--G-AG--T-G-CG-A--AA-G-C---A-TG--GG-G--               |      |     |     |     |    |     |      |     |     |     |       |      |     |     |     |     |     |     |     |     |     |     |      |     |      |     |     |      |
| AG-C-G-AA-----CG--GGBacteria(100);unclassified(100);unclassified(100);unclassified(100);unclassified(100);unclassified(100);unclassified(100);unclassified(100);unclassified(100);                                         |      |     |     |     |    |     |      |     |     |     |       |      |     |     |     |     |     |     |     |     |     |     |      |     |      |     |     |      |
| Otu0007                                                                                                                                                                                                                    | 1    | 0   | 0   | 22  | 36 | 83  | 0    | 0   | 0   | 97  | 25    | 0    | 2   | 13  | 31  | 0   | 0   | 0   | 0   | 6   | 3   | 1   | 142  | 0   | 1243 | 837 | 1   | 56   |
| 1                                                                                                                                                                                                                          | 8    | 4   | 10  | 1   | 0  | 0   | 1    | 30  | 9   | 20  | 2     | 0    | 110 | 0   | 0   | 14  | 130 | 0   | 0   | 18  | 10  | 0   | 13   | 0   | 0    | 0   | 0   | 11   |
| 0                                                                                                                                                                                                                          | 0    | 0   | 0   | 0   | 0  | 1   | 0    | 0   | 0   | 0   | 0     | 0    | 0   | 0   | 0   | 0   | 0   | 0   | 0   | 0   | 35  | 53  | 76   | 0   | 20   | 2   | 0   | 1    |
| 67                                                                                                                                                                                                                         | 0    | 0   | 0   | 3   | 0  | 0   | 0    | 0   | 10  | 0   | 0     | 0    | 0   | 0   | 7   | 0   | 0   | 2   | 32  | 86  | 0   | 4   | 0    | 24  | 0    | 1   |     |      |
| M02255_76_000000000-ADUNE_1_1101_12689_9279G---AA---GC-AC-CG-----GCT-A-A-----C-----T--C--CG-T--GC-CA-----GC-A--G-C--CG-CG-----GT--A----AT-AC-GG-A-----G-GG-T-G-C-G-----A--G-CT-G-T-T-----AA---                             |      |     |     |     |    |     |      |     |     |     |       |      |     |     |     |     |     |     |     |     |     |     |      |     |      |     |     |      |
| T-C-A-G-----G-A-A--G--TG--A-AA-GC--C-C-GG-G-G-----CT-C-AA-----C-C-T-C-G-G-A--A-C---A-G--C-A---T--T-----T--TG-A-A---C-----T--G-G--CA--G-A-C---T-A-G-A-G-T--C---T-TG---TA-G-A-----G-G-G-G--GG-T-----AG--A--ATT---T-C-A-G-GT- |      |     |     |     |    |     |      |     |     |     |       |      |     |     |     |     |     |     |     |     |     |     |      |     |      |     |     |      |
| -GT-A-G-CG-GT--G---A--A---TG-C-GT-AG--AG-A-TC--T-G--A-A-G-G-A-AT-A-CC---GG--T--G--GC-GAA-G--G-C--G-----G--C-C-C-C---CTG--G--AC-A-A-----A-G---A-C-T--GA--CG-C-T-C--A-GA--T-G-CG-A--AA-G-C---G-TG--GG-G--AG-C-A-             |      |     |     |     |    |     |      |     |     |     |       |      |     |     |     |     |     |     |     |     |     |     |      |     |      |     |     |      |
| AA-----CA--GGBacteria(100);Proteobacteria(100);Gammaproteobacteria(100);Vibrionales(100);Vibrionaceae(100);unclassified(95);unclassified(95);unclassified(95);unclassified(95);                                            |      |     |     |     |    |     |      |     |     |     |       |      |     |     |     |     |     |     |     |     |     |     |      |     |      |     |     |      |
| Otu0008                                                                                                                                                                                                                    | 0    | 0   | 0   | 0   | 1  | 0   | 0    | 0   | 0   | 4   | 0     | 7    | 72  | 28  | 5   | 9   | 54  | 14  | 4   | 4   | 4   | 23  | 0    | 0   | 0    | 0   | 5   | 0    |
| 4                                                                                                                                                                                                                          | 0    | 0   | 0   | 7   | 0  | 0   | 1    | 0   | 1   | 0   | 25    | 7    | 2   | 5   | 4   | 11  | 10  | 101 | 0   | 1   | 7   | 21  | 0    | 5   | 91   | 55  | 75  | 68   |
| 9                                                                                                                                                                                                                          | 3    | 13  | 8   | 20  | 0  | 4   | 211  | 22  | 234 | 69  | 19    | 34   | 86  | 45  | 80  | 0   | 0   | 0   | 0   | 3   | 1   | 0   | 0    | 0   | 0    | 0   | 0   | 0    |
| 0                                                                                                                                                                                                                          | 0    | 0   | 0   | 12  | 4  | 5   | 13   | 73  | 4   | 104 | 3     | 122  | 0   | 6   | 53  | 10  | 0   | 1   | 0   | 0   | 0   | 1   | 0    | 0   | 0    | 0   |     |      |
| M02255_76_000000000-ADUNE_1_2114_23043_11222G---AC---AG-AA-TAA-----GCA-C-C-----G--G--C---T--AACT-CTG-TG-----CC-A--G-C--AG-CC-----GC--G-----GT-AA-TA-CA-----G-AG-G-G-T-GC-----A--A-GC-G-T-T---                              |      |     |     |     |    |     |      |     |     |     |       |      |     |     |     |     |     |     |     |     |     |     |      |     |      |     |     |      |
| -----AA---G-T-C-G-----G-A-T--G--TG--A-AA-TC--C-C-CG-G-G-----CT-C-AA-----C-C-T-G-G-G-A--A-C---T-G--C-A---T--T-----C--AA-A-A---C-----T--G-T--CG--A-G-C---T-A-G-A-G-T--A---T-GG---TA-G-A-----G-G-G-T---GG-T-----GG--A--ATT--- |      |     |     |     |    |     |      |     |     |     |       |      |     |     |     |     |     |     |     |     |     |     |      |     |      |     |     |      |
| T-C-C-T-GT--GT-A-G-CG-GT--G---A--A---TG-C-GT-AG--AT-A-TA--G-G--A-A-G-G-A-AC-A-CC---AG--T--G--GC-GAA-G--G-C--G-----A--C-C-A-C---CTG--G--AC-T-G-----A-T---A-C-T--GA--CA-C-T-G--A-GG--T-G-CG-A--AA-G-C---G-TG--GG-            |      |     |     |     |    |     |      |     |     |     |       |      |     |     |     |     |     |     |     |     |     |     |      |     |      |     |     |      |
| G--AG-C-A-AA-----CA--GGBacteria(100);Proteobacteria(100);Gammaproteobacteria(100);unclassified(84);unclassified(84);unclassified(84);unclassified(84);unclassified(84);unclassified(84);                                   |      |     |     |     |    |     |      |     |     |     |       |      |     |     |     |     |     |     |     |     |     |     |      |     |      |     |     |      |
| Otu0009                                                                                                                                                                                                                    | 408  | 0   | 0   | 0   | 0  | 30  | 0    | 0   | 0   | 0   | 0     | 0    | 0   | 13  | 0   | 0   | 0   | 1   | 0   | 29  | 29  | 6   | 24   | 57  | 43   | 25  | 0   | 312  |
| 2                                                                                                                                                                                                                          | 1    | 202 | 96  | 0   | 2  | 236 | 32   | 219 | 52  | 4   | 15    | 5    | 18  | 125 | 0   | 0   | 0   | 0   | 18  | 319 | 0   | 30  | 231  | 42  | 696  | 0   | 72  | 0    |
| 52                                                                                                                                                                                                                         | 30   | 16  | 4   | 0   | 10 | 8   | 0    | 16  | 27  | 20  | 4     | 67   | 3   | 432 | 131 | 128 | 379 | 161 | 92  | 0   | 44  | 27  | 0    | 160 | 0    | 0   | 76  | 35   |
| 89                                                                                                                                                                                                                         | 317  | 87  | 373 | 107 | 54 | 7   | 60   | 0   | 60  | 8   | 0     | 0    | 67  | 2   | 311 | 158 | 57  | 30  | 39  | 172 | 123 | 78  | 4    | 225 | 0    | 134 |     |      |
| M02255_77_000000000-ADUT3_1_1101_11476_14959T---AC---GG-AG-GGG-----GCT-A-G-----C--G--T---T--GT-T-CGG-AA-----TT-A--C-T--GG-GC-----GT--A----AA-GC-GC-AC-----G-TA-G-G-C-G-----G--A-CC-G-G-A---                                |      |     |     |     |    |     |      |     |     |     |       |      |     |     |     |     |     |     |     |     |     |     |      |     |      |     |     |      |
| -----AA---G-T-T-G-----G-G-G--G--TG--A-AA-TC--C-C-GG-G-G-----CT-C-AA-----C-C-T-C-G-G-A--A-C---T-G--C-C---T--T-----C--AA-A-A---C-----T--A-T--TG--G-T-C---T-G-G-A-G-T--T---C-GA---GA-G-A-----G-G-T-G---AG-T-----GG--A--ATT--- |      |     |     |     |    |     |      |     |     |     |       |      |     |     |     |     |     |     |     |     |     |     |      |     |      |     |     |      |
| C-C-G-A-GT--GT-A-G-AG-GT--G---A--A---TT-C-GT-AG--AT-A-TT--C-G--G-A-G-G-A-AC-A-CC---AG--T--G--GC-GAA-G--G-C--G-----G--C-T-C-A---CTG--G--CT-C-G-----A-T---A-C-T--GA--CG-C-T-G--A-GG--T-G-CG-A--AA-G-C---G-TG--GG-            |      |     |     |     |    |     |      |     |     |     |       |      |     |     |     |     |     |     |     |     |     |     |      |     |      |     |     |      |
| G--AG-C-A-AA-----CA--GGBacteria(100);Proteobacteria(100);Alphaproteobacteria(100);Rhodobacterales(99);Rhodobacteraceae(99);Paracoccus(86);unclassified(86);unclassified(86);unclassified(86);                              |      |     |     |     |    |     |      |     |     |     |       |      |     |     |     |     |     |     |     |     |     |     |      |     |      |     |     |      |



|                                                                                                                                                                                                                        |      |     |      |      |      |     |     |     |      |     |      |     |     |      |      |      |     |      |      |     |     |     |     |     |     |     |     |     |
|------------------------------------------------------------------------------------------------------------------------------------------------------------------------------------------------------------------------|------|-----|------|------|------|-----|-----|-----|------|-----|------|-----|-----|------|------|------|-----|------|------|-----|-----|-----|-----|-----|-----|-----|-----|-----|
| Otu0010                                                                                                                                                                                                                | 2425 | 268 | 803  | 1275 | 0    | 128 | 391 | 419 | 0    | 110 | 0    | 3   | 0   | 11   | 5    | 4    | 7   | 17   | 34   | 1   | 72  | 18  | 0   | 0   | 13  | 91  | 43  | 102 |
| 98                                                                                                                                                                                                                     | 3    | 53  | 403  | 162  | 326  | 57  | 180 | 308 | 97   | 435 | 181  | 7   | 115 | 1475 | 13   | 181  | 227 | 11   | 72   | 109 | 50  | 347 | 116 | 207 | 12  | 0   | 70  | 0   |
| 41                                                                                                                                                                                                                     | 28   | 75  | 8    | 17   | 15   | 23  | 7   | 0   | 11   | 0   | 0    | 0   | 50  | 229  | 27   | 30   | 219 | 93   | 476  | 0   | 140 | 46  | 0   | 376 | 0   | 0   | 852 | 319 |
| 36                                                                                                                                                                                                                     | 0    | 0   | 1098 | 169  | 66   | 12  | 6   | 0   | 568  | 0   | 29   | 9   | 26  | 0    | 114  | 1159 | 152 | 1083 | 352  | 127 | 529 | 203 | 16  | 296 | 364 | 462 |     |     |
| M02255_77_000000000-ADUT3_1_1101_25799_6575 T---AC---GA-AG-GGG-----GCT-A-G-----C-G--T---T-GC-T-CGG-AA-----TC-A--C-T--GG-GC-----GT--A-----AA-GG-GC-GC-----G-TA-G-G-C-G-----G--C-GT-T-T-T-----                           |      |     |      |      |      |     |     |     |      |     |      |     |     |      |      |      |     |      |      |     |     |     |     |     |     |     |     |     |
| AA---G-T-C-G-----G-G-G--G--TG--A-AA-GC--C-T-GT-G-G----CT-C-AA-----C-C-A-C-A-G-A-A-T---G-G--C-C---T-T-----C-GA-T-A--C-----T-G-G--GA-C-G-C---T-T-G-A-G-T-A--T-GG----TA-G-A-----G-G-T-T--GG-T-----GG--A--ACT---G-C-       |      |     |      |      |      |     |     |     |      |     |      |     |     |      |      |      |     |      |      |     |     |     |     |     |     |     |     |     |
| G-A-GT--GT-A-G-AG-GT--G---A-A-A---TT-C-GT-AG--AT-A-TT--C-G--C-A-A-G-A-AC-A-CC--GG--T-G--GC-GAA-G-G-C-G-----G--C-C-A-A---CTG--G--AC-C-A-----T-T---A-C-T-GA--CG-C-T-G--A-GG--C-G-CG-A--AA-G-C---G-TG--GG-G--             |      |     |      |      |      |     |     |     |      |     |      |     |     |      |      |      |     |      |      |     |     |     |     |     |     |     |     |     |
| AG-C-A-AA-----CA--GG Bacteria(100);Proteobacteria(100);Alphaproteobacteria(100);Rhizobiales(100);Methylobacteriaceae(100);Methylobacterium(100);unclassified(100);unclassified(100);unclassified(100);                 |      |     |      |      |      |     |     |     |      |     |      |     |     |      |      |      |     |      |      |     |     |     |     |     |     |     |     |     |
| Otu0011                                                                                                                                                                                                                | 0    | 0   | 92   | 375  | 163  | 130 | 750 | 79  | 212  | 246 | 2    | 0   | 4   | 20   | 11   | 0    | 6   | 0    | 2    | 2   | 25  | 5   | 0   | 3   | 0   | 8   | 8   | 62  |
| 33                                                                                                                                                                                                                     | 43   | 418 | 0    | 59   | 36   | 114 | 25  | 12  | 87   | 39  | 125  | 0   | 41  | 158  | 307  | 35   | 78  | 6    | 199  | 514 | 0   | 14  | 99  | 0   | 24  | 0   | 6   | 103 |
| 12                                                                                                                                                                                                                     | 314  | 93  | 17   | 36   | 19   | 0   | 59  | 22  | 4    | 13  | 4    | 7   | 0   | 2192 | 3100 | 20   | 141 | 167  | 173  | 6   | 25  | 9   | 216 | 255 | 0   | 0   | 40  | 287 |
| 138                                                                                                                                                                                                                    | 182  | 192 | 186  | 463  | 299  | 15  | 40  | 0   | 245  | 0   | 484  | 3   | 172 | 0    | 132  | 24   | 85  | 33   | 405  | 746 | 306 | 81  | 14  | 59  | 0   | 554 |     |     |
| M02255_77_000000000-ADUT3_1_1106_6762_5073 T---AC---GT-AT-GTC-----ACG-A-G-----C-G--T---T-AT-C-CGG-AT-----TT-A--T-T--GG-GC-----GT--A-----AA-GC-GC-GT-----C-TA-G-G-T-G-----G--T-TA-T-G-T-----AA---                       |      |     |      |      |      |     |     |     |      |     |      |     |     |      |      |      |     |      |      |     |     |     |     |     |     |     |     |     |
| -G-T-C-T-----G-A-T--G--TG--A-AA-AT--G-C-AG-G-G----CT-C-AA-----C-T-C-T-G-T-A--T---T-G--C-G---T-T-----G--GA-A-A--C-----T-G-T-AT--A-A-C---T-A-G-A-G-T-A--C-TG----GA-G-A-----G-G-T-A--AG-C-----GG--A--ACT---A-C-A-A-GT-    |      |     |      |      |      |     |     |     |      |     |      |     |     |      |      |      |     |      |      |     |     |     |     |     |     |     |     |     |
| GT-A-G-AG-GT--G---A-A-A---TT-C-GT-AG--AT-A-TT--T-G--T-A-G-G-A-AT-G-CC--GA--T-G--GG-GAA-G-C-C-A-----G--C-T-T-A--CTG--G--AC-A-G-----A-T---A-C-T-GA--CG-C-T-G--A-AG--C-G-CG-A--AA-G-C---G-TG--GG-T--AG-C-A-               |      |     |      |      |      |     |     |     |      |     |      |     |     |      |      |      |     |      |      |     |     |     |     |     |     |     |     |     |
| AA-----CA--GG Bacteria(100);Fusobacteria(100);Fusobacteria(100);Fusobacteriales(100);Fusobacteriaceae(100);Fusobacterium(100);unclassified(100);unclassified(100);unclassified(100);                                   |      |     |      |      |      |     |     |     |      |     |      |     |     |      |      |      |     |      |      |     |     |     |     |     |     |     |     |     |
| Otu0012                                                                                                                                                                                                                | 384  | 386 | 5    | 1    | 1    | 36  | 812 | 349 | 463  | 92  | 12   | 5   | 8   | 50   | 0    | 1    | 3   | 1    | 1    | 14  | 33  | 4   | 36  | 7   | 21  | 17  | 3   | 16  |
| 5                                                                                                                                                                                                                      | 11   | 3   | 39   | 0    | 196  | 0   | 382 | 0   | 179  | 111 | 659  | 269 | 278 | 0    | 48   | 558  | 0   | 8    | 238  | 89  | 119 | 4   | 429 | 58  | 7   | 0   | 0   | 0   |
| 293                                                                                                                                                                                                                    | 275  | 15  | 54   | 7    | 26   | 5   | 119 | 12  | 23   | 152 | 102  | 37  | 50  | 520  | 90   | 74   | 52  | 284  | 1484 | 448 | 46  | 13  | 268 | 994 | 0   | 1   | 83  | 288 |
| 196                                                                                                                                                                                                                    | 57   | 505 | 195  | 606  | 1333 | 92  | 133 | 14  | 2198 | 61  | 2913 | 79  | 353 | 23   | 0    | 216  | 0   | 30   | 24   | 0   | 327 | 341 | 22  | 152 | 1   | 162 |     |     |
| M02255_76_000000000-ADUNE_1_1102_16502_18697 T---AC---GT-AA-GGT-----CCG-A-G-----C-G--T---T-GT-C-CGG-AA-----TC-A--T-T--GG-GC-----GT--A-----AA-GG-GT-AC-----G-TA-G-G-C-G-----G--A-TA-A-G-C-----                          |      |     |      |      |      |     |     |     |      |     |      |     |     |      |      |      |     |      |      |     |     |     |     |     |     |     |     |     |
| -----AA---G-T-T-A-----G-A-A--G--TG--A-AA-TC--C-T-AT-A-G----CT-C-AA-----C-T-A-T-A-G-T-A-----A-G--C-T---T-T-----T-AA-A-A--C-----T-G-C--TC-A-T-C---T-T-G-A-G-G--T--A-TG----GA-A-G-----G-G-A-A--AG-T-----GG--A--ATT---C-C- |      |     |      |      |      |     |     |     |      |     |      |     |     |      |      |      |     |      |      |     |     |     |     |     |     |     |     |     |
| T-A-GT--GT-A-G-CG-GT--G---A-A-A---TG-C-GC-AG--AT-A-TT--A-G--G-A-G-G-A-AT-A-CC--GG--T-G--GC-GAA-G-G-C-G-----A--C-T-T-T---CTG--G--CC-A-T-----A-A---A-C-T-GA--CG-C-T-G--A-AG--T-A-CG-A--AA-G-C---G-TG--GG-T--AG-C-A-      |      |     |      |      |      |     |     |     |      |     |      |     |     |      |      |      |     |      |      |     |     |     |     |     |     |     |     |     |
| AG-C-A-AA-----CA--GG Bacteria(100);Firmicutes(100);Clostridia(100);Clostridiales(100);Family_XI_Incertae_Sedis(100);Anaerococcus(100);unclassified(100);unclassified(100);unclassified(100);                           |      |     |      |      |      |     |     |     |      |     |      |     |     |      |      |      |     |      |      |     |     |     |     |     |     |     |     |     |
| Otu0013                                                                                                                                                                                                                | 136  | 264 | 0    | 89   | 538  | 11  | 0   | 70  | 316  | 56  | 1    | 0   | 0   | 0    | 0    | 0    | 0   | 4    | 30   | 55  | 6   | 20  | 8   | 24  | 11  | 8   | 118 |     |
| 4                                                                                                                                                                                                                      | 4    | 0   | 0    |      |      |     |     |     |      |     |      |     |     |      |      |      |     |      |      |     |     |     |     |     |     |     |     |     |



|                                                                                                                                                                                                                            |      |     |     |     |     |       |      |      |     |     |      |     |     |     |     |     |     |     |      |      |      |     |      |      |     |     |     |    |    |
|----------------------------------------------------------------------------------------------------------------------------------------------------------------------------------------------------------------------------|------|-----|-----|-----|-----|-------|------|------|-----|-----|------|-----|-----|-----|-----|-----|-----|-----|------|------|------|-----|------|------|-----|-----|-----|----|----|
| Otu0015                                                                                                                                                                                                                    | 0    | 0   | 0   | 1   | 18  | 117   | 1    | 0    | 0   | 60  | 198  | 0   | 2   | 42  | 39  | 0   | 0   | 0   | 0    | 21   | 17   | 0   | 327  | 0    | 241 | 50  | 2   | 35 |    |
|                                                                                                                                                                                                                            | 0    | 0   | 9   | 9   | 4   | 0     | 2    | 1    | 28  | 26  | 42   | 0   | 1   | 246 | 6   | 3   | 38  | 314 | 1    | 21   | 35   | 39  | 0    | 58   | 0   | 2   | 0   | 24 |    |
|                                                                                                                                                                                                                            | 0    | 0   | 0   | 0   | 0   | 0     | 0    | 7    | 0   | 0   | 0    | 0   | 0   | 0   | 0   | 0   | 0   | 0   | 0    | 0    | 42   | 49  | 51   | 0    | 0   | 0   | 0   | 1  |    |
|                                                                                                                                                                                                                            | 110  | 1   | 0   | 2   | 8   | 1     | 0    | 0    | 0   | 2   | 0    | 0   | 0   | 0   | 23  | 0   | 0   | 0   | 26   | 32   | 0    | 0   | 1    | 13   | 0   | 0   |     |    |    |
| M02255_76_000000000-ADUNE_1_2112_17062_19534 G---AA--GA-AG-CAC-----CGG-C-T-----A-A-C--T--CC-G-TGC-CA-----GC-A--G-C-CG-CG-----GT-A----AT-AC-GG-A-----G-GG-T-G-C-G-----A-G-CT-G-T-T-----                                     |      |     |     |     |     |       |      |      |     |     |      |     |     |     |     |     |     |     |      |      |      |     |      |      |     |     |     |    |    |
| -----AA---G-C-A-G-----G-A-T--G--TG--A-AA-GC--C-C-GG-G-G----CT-C-AA-----C-C-T-C-G-G-A-A-C---A-G--C-A--T-T-----T--TG-A-A--C-----T--G-G--CA--G-A-C---T-A-G-A-G-T--C---T-TG-----TA-G-A-----G-G-G-G---GG-T-----AG--A--ATT---    |      |     |     |     |     |       |      |      |     |     |      |     |     |     |     |     |     |     |      |      |      |     |      |      |     |     |     |    |    |
| T-C-A-G-GT--GT-A-G-CG-GT--G---A--A---TG-C-GT-AG--AG-A-TC--T-G--A-A-G-G-A-AT-A-CC---GG--T--G--GC-GAA-G--G-C-G-----G--C-C-C-C---CTG--G--AC-A-A-----A-G---A-C-T--GA--CG-C-T-C--A-GA--T-G-CG-A--AA-G-C---G-TG--                |      |     |     |     |     |       |      |      |     |     |      |     |     |     |     |     |     |     |      |      |      |     |      |      |     |     |     |    |    |
| GG-G--AG-C-A-AA-----CA--GG Bacteria(100);Proteobacteria(100);Gammaproteobacteria(100);Vibrionales(100);Vibrionaceae(100);unclassified(94);unclassified(94);unclassified(94);unclassified(94);                              |      |     |     |     |     |       |      |      |     |     |      |     |     |     |     |     |     |     |      |      |      |     |      |      |     |     |     |    |    |
| Otu0016                                                                                                                                                                                                                    | 241  | 288 | 0   | 43  | 0   | 33    | 0    | 75   | 187 | 136 | 0    | 51  | 238 | 70  | 47  | 13  | 10  | 128 | 219  | 159  | 46   | 4   | 3    | 767  | 0   | 45  | 147 | 83 |    |
|                                                                                                                                                                                                                            | 384  | 2   | 7   | 2   | 164 | 190   | 0    | 19   | 0   | 38  | 90   | 35  | 0   | 16  | 134 | 3   | 125 | 205 | 0    | 54   | 121  | 0   | 5    | 38   | 13  | 14  | 0   | 2  | 17 |
|                                                                                                                                                                                                                            | 0    | 0   | 0   | 7   | 0   | 0     | 4    | 0    | 0   | 0   | 0    | 1   | 13  | 6   | 0   | 1   | 96  | 16  | 0    | 0    | 0    | 60  | 88   | 1213 | 0   | 0   | 0   | 25 | 15 |
|                                                                                                                                                                                                                            | 60   | 79  | 98  | 25  | 52  | 33    | 1    | 8    | 916 | 46  | 4    | 0   | 15  | 15  | 0   | 0   | 150 | 0   | 21   | 67   | 0    | 0   | 42   | 4    | 36  | 231 | 26  |    |    |
| M02255_77_000000000-ADUT3_1_1102_12712_17990 T---AC--GT-AG-GGC-----GCA-A-G-----C-G--T---T--AT-C-CGG-AA-----TT-A--T-T--GG-GC-----GT-A----AA-GA-GC-TC-----G-TA-G-G-C-G-----G--T-TT-G-T-C-----                                |      |     |     |     |     |       |      |      |     |     |      |     |     |     |     |     |     |     |      |      |      |     |      |      |     |     |     |    |    |
| -----GC---G-T-C-T-----G-C-C--G--TG--A-AA-GT--C-C-GG-G-G----CT-C-AA-----C-C-C-C-G-G-A--T-C---T-G--C-G--G--T-----G--GG-T-A--C-----G--G-G--CA--G-A-C---T-A-G-A-G-T--G---A-TG-----TA-G-G-----G-G-A-G---AC-T-----GG--A--ATT---  |      |     |     |     |     |       |      |      |     |     |      |     |     |     |     |     |     |     |      |      |      |     |      |      |     |     |     |    |    |
| C-C-T-G-GT--GT-A-G-CG-GT--G---A--A---TG-C-GC-AG--AT-A-TC--A-G--G-A-G-G-A-AC-A-CC---GA--T--G--GC-GAA-G--G-C-A-----G--G-T-C-T---CTG--G--GC-A-T-----T-A---A-C-T--GA--CG-C-T-G--A-GG--A-G-CG-A--AA-G-C---A-TG--                |      |     |     |     |     |       |      |      |     |     |      |     |     |     |     |     |     |     |      |      |      |     |      |      |     |     |     |    |    |
| GG-G--AG-C-G-AA-----CA--GG Bacteria(100);Actinobacteria(100);Actinobacteria(100);Actinobacteridae(100);Actinomycetales(100);Micrococcineae(100);Micrococcaceae(100);unclassified;unclassified;                             |      |     |     |     |     |       |      |      |     |     |      |     |     |     |     |     |     |     |      |      |      |     |      |      |     |     |     |    |    |
| Otu0017                                                                                                                                                                                                                    | 0    | 0   | 0   | 0   | 0   | 21371 | 0    | 0    | 0   | 0   | 0    | 0   | 0   | 0   | 0   | 0   | 0   | 0   | 0    | 0    | 0    | 0   | 1878 | 15   | 0   | 3   | 0   | 0  |    |
|                                                                                                                                                                                                                            | 0    | 0   | 0   | 0   | 0   | 0     | 0    | 0    | 0   | 0   | 0    | 0   | 0   | 0   | 0   | 0   | 0   | 0   | 0    | 4    | 0    | 0   | 0    | 0    | 0   | 4   | 0   | 0  |    |
|                                                                                                                                                                                                                            | 0    | 0   | 0   | 0   | 0   | 0     | 0    | 0    | 0   | 0   | 0    | 0   | 0   | 0   | 0   | 0   | 0   | 0   | 0    | 0    | 0    | 6   | 0    | 0    | 0   | 0   | 0   | 0  |    |
|                                                                                                                                                                                                                            | 0    | 0   | 0   | 0   | 0   | 0     | 1    | 1    | 0   | 0   | 0    | 0   | 0   | 0   | 0   | 0   | 0   | 0   | 0    | 0    | 0    | 0   | 5    | 0    | 0   | 0   |     |    |    |
| M02255_77_000000000-ADUT3_1_1101_7636_3682 T---AC--AT-AT-GTC-----GCA-A-G-----C-G--T---T--AT-C-CGG-AT-----TT-A--T-T--GG-GC-----GT-A----AA-GC-GC-GT-----C-TA-G-G-C-G-----G--T-TT-A-C-T-----AA---                             |      |     |     |     |     |       |      |      |     |     |      |     |     |     |     |     |     |     |      |      |      |     |      |      |     |     |     |    |    |
| -G-T-C-T-----G-A-T--G--TG--A-AA-AT--G-C-AG-G-G----CT-C-AA-----C-T-C-T-G-T-A--T-----T-G--C-G--T-T-----G--GA-A-A--C-----T--G-G--TA--G-A-C---T-A-G-A-G-T--A---T-TG-----GA-G-A-----G-G-T-G--GG-C-----GG--A--ACT---A-C-A-A-GT-  |      |     |     |     |     |       |      |      |     |     |      |     |     |     |     |     |     |     |      |      |      |     |      |      |     |     |     |    |    |
| -GT-A-G-AG-GT--G---G--A-A---TT-C-GT-AG--AT-A-TT--T-G--T-A-G-G-A-AT-G-CC---GA--T--G--GA-GAA-G--T-C-A-----G--C-T-C-A---CTG--G--AC-A-T-----A-T---A-C-T--GA--CG-C-T-A--A-AG--C-G-CG-A--AA-G-C---G-TG--GG-G--AG-C-A-            |      |     |     |     |     |       |      |      |     |     |      |     |     |     |     |     |     |     |      |      |      |     |      |      |     |     |     |    |    |
| AA-----CA--GG Bacteria(100);Fusobacteria(100);Fusobacteria(100);Fusobacteriales(100);Fusobacteriaceae(100);unclassified(100);unclassified(100);unclassified(100);unclassified(100);                                        |      |     |     |     |     |       |      |      |     |     |      |     |     |     |     |     |     |     |      |      |      |     |      |      |     |     |     |    |    |
| Otu0018                                                                                                                                                                                                                    | 549  | 126 | 0   | 51  | 0   | 0     | 0    | 68   | 87  | 0   | 0    | 5   | 0   | 1   | 0   | 0   | 0   | 0   | 0    | 4    | 3    | 1   | 11   | 0    | 0   | 1   | 0   | 1  |    |
|                                                                                                                                                                                                                            | 0    | 0   | 0   | 0   | 0   | 15    | 87   | 0    | 22  | 0   | 48   | 0   | 9   | 49  | 0   | 11  | 0   | 0   | 0    | 0    | 0    | 0   | 101  | 9    | 115 | 0   | 0   | 0  |    |
|                                                                                                                                                                                                                            | 0    | 0   | 0   | 7   | 0   | 2     | 0    | 7    | 0   | 0   | 0    | 5   | 0   | 41  | 0   | 10  | 49  | 66  | 0    | 0    | 1    | 23  | 0    | 0    | 0   | 0   | 23  | 12 |    |
|                                                                                                                                                                                                                            | 0    | 179 | 162 | 39  | 0   | 0     | 11   | 0    | 0   | 0   | 27   | 0   | 48  | 0   | 56  | 45  | 30  | 0   | 21   | 22   | 21   | 0   | 0    | 4    | 1   | 0   |     |    |    |
| M02255_77_000000000-ADUT3_1_1105_10928_6952 T---AC--GT-AG-GGT-----GCG-A-G-----C-G--T---T--GT-C-CGG-AA-----TT-A--T-T--GG-GC-----GT-A----AA-GG-GC-TC-----G-TA-G-G-C-G-----G--T-TT-G-T-C-----GC-                              |      |     |     |     |     |       |      |      |     |     |      |     |     |     |     |     |     |     |      |      |      |     |      |      |     |     |     |    |    |
| ---G-T-C-G-----G-G-A--G--TG--A-AA-AC--T-C-AG-G-G----CT-T-AA-----C-C-C-T-G-A-G--C-C---T-G--C-T---T-C-----C--GA-T-A--C-----G--G-G--CA--G-A-C---T-A-G-A-G-G--T---A-TG-----CA-G-G-----G-G-A-G---AA-C-----GG--A--ATT---C-C-T-G- |      |     |     |     |     |       |      |      |     |     |      |     |     |     |     |     |     |     |      |      |      |     |      |      |     |     |     |    |    |
| GT--GT-A-G-CG-GT--G---A--A---TG-C-GC-AG--AT-A-TC--A-G--G-A-G-G-A-AC-A-CC---GG--T--G--GC-GAA-G--G-C-G-----G--T-T-C-T---CTG--G--GC-A-T-----T-A---C-C-T--GA--CG-C-T-G--A-GG--A-G-CG-A--AA-G-T---G-TG--GG-G--AG-               |      |     |     |     |     |       |      |      |     |     |      |     |     |     |     |     |     |     |      |      |      |     |      |      |     |     |     |    |    |
| C-G-AA-----CA--GG Bacteria(100);Actinobacteria(100);Actinobacteria(100);Actinobacteridae(100);Actinomycetales(100);Propionibacterineae(100);Nocardiodaceae(94);unclassified(94);unclassified(94);                          |      |     |     |     |     |       |      |      |     |     |      |     |     |     |     |     |     |     |      |      |      |     |      |      |     |     |     |    |    |
| Otu0019                                                                                                                                                                                                                    | 0    | 0   | 0   | 0   | 0   | 41    | 418  | 481  | 0   | 0   | 0    | 0   | 0   | 0   | 10  | 0   | 0   | 0   | 5    | 0    | 0    | 0   | 29   | 0    | 0   | 0   | 0   | 0  |    |
|                                                                                                                                                                                                                            | 10   | 0   | 0   | 0   | 0   | 35    | 0    | 15   | 3   | 9   | 44   | 0   | 112 | 0   | 2   | 0   | 76  | 1   | 0    | 0    | 0    | 0   | 18   | 1    | 1   | 0   | 0   |    |    |
|                                                                                                                                                                                                                            | 4082 | 489 | 669 | 173 | 424 | 194   | 2561 | 1260 | 257 | 174 | 1814 | 200 | 49  | 131 | 241 | 165 | 955 | 135 | 604  | 5894 | 4625 | 0   | 9    | 0    | 0   | 0   | 0   | 2  |    |
|                                                                                                                                                                                                                            | 0    | 0   | 0   | 175 | 0   | 20    | 0    | 3    | 0   | 50  | 0    | 0   | 4   | 51  | 0   | 291 | 464 | 270 | 4263 | 187  | 127  | 327 | 401  | 8    | 17  | 0   | 0   |    |    |
| M02255_77_000000000-ADUT3_1_1109_7316_17338 T---AC--GA-AG-GGG-----GCT-A-G-----C-G--T---T--GC-T-CGG-AA-----TT-A--C-T--GG-GC-----GT-A----AA-GG-GA-GC-----G-TA-G-G-C-G-----G--A-CT-G-T-T-----                                 |      |     |     |     |     |       |      |      |     |     |      |     |     |     |     |     |     |     |      |      |      |     |      |      |     |     |     |    |    |
| AA---G-T-T-A-----G-A-G--G--TG--A-AA-GC--C-C-AG-G-G----CT-C-AA-----C-C-T-T-G-G-A--A-T---T-G--C-C---T-T-----T--GA-T-A--C-----T--G-G--CA--G-T-C---T-T-G-A-G-T--A---C-GG-----AA-G-A-----G-G-T-A---TG-T-----GG--A--ACT---C-C-G- |      |     |     |     |     |       |      |      |     |     |      |     |     |     |     |     |     |     |      |      |      |     |      |      |     |     |     |    |    |
| A-GT--GT-A-G-AG-GT--G---A--A-A---TT-C-GT-AG--AT-A-TT--C-G--G-A-A-G-A-AC-A-CC---AG--T--G--GC-GAA-G--G-C-G-----A--C-A-T-A---CTG--G--TC-C-G-----T-T---A-C-T--GA--CG-C-T-G--A-GG--C-T-CG-A--AA-G-C---G-TG--GG-G--AG-           |      |     |     |     |     |       |      |      |     |     |      |     |     |     |     |     |     |     |      |      |      |     |      |      |     |     |     |    |    |
| C-A-AA-----CA--GG Bacteria(100);Proteobacteria(100);Alphaproteobacteria(100);Caulobacterales(100);Caulobacteraceae(100);Caulobacter(100);unclassified(100);unclassified(100);unclassified(100);                            |      |     |     |     |     |       |      |      |     |     |      |     |     |     |     |     |     |     |      |      |      |     |      |      |     |     |     |    |    |



|                                                                                                                                                                                                                    |      |     |      |     |      |     |      |      |      |     |       |      |     |      |     |      |     |      |      |      |      |     |      |      |      |      |     |     |
|--------------------------------------------------------------------------------------------------------------------------------------------------------------------------------------------------------------------|------|-----|------|-----|------|-----|------|------|------|-----|-------|------|-----|------|-----|------|-----|------|------|------|------|-----|------|------|------|------|-----|-----|
| Otu0020                                                                                                                                                                                                            | 0    | 1   | 0    | 0   | 0    | 30  | 0    | 0    | 0    | 0   | 0     | 1    | 1   | 0    | 4   | 0    | 0   | 0    | 13   | 7    | 51   | 0   | 61   | 5    | 55   | 47   | 8   | 51  |
| 52                                                                                                                                                                                                                 | 2    | 668 | 250  | 786 | 1010 | 424 | 122  | 0    | 133  | 357 | 36    | 0    | 0   | 181  | 27  | 0    | 0   | 2    | 0    | 0    | 8    | 30  | 196  | 173  | 0    | 3    | 0   | 0   |
| 0                                                                                                                                                                                                                  | 0    | 12  | 5    | 0   | 0    | 0   | 0    | 0    | 0    | 0   | 0     | 18   | 10  | 0    | 10  | 79   | 419 | 0    | 0    | 0    | 0    | 11  | 0    | 78   | 0    | 0    | 39  | 77  |
| 58                                                                                                                                                                                                                 | 283  | 225 | 244  | 78  | 45   | 59  | 5    | 5    | 777  | 12  | 0     | 19   | 166 | 0    | 388 | 1614 | 322 | 454  | 0    | 0    | 0    | 165 | 0    | 1    | 0    | 0    |     |     |
| M02255_77_000000000-ADUT3_1_2113_15045_19476 T---AC---GG-AG-GGA-----GCT-A-G-----C-G-T---T-GT-T-CGG-AA-----TT-A-C-T-GG-GC-----GT-A---AA-GC-GC-GC-----G-TA-G-G-C-G-----G-C-TA-T-T-C-----                             |      |     |      |     |      |     |      |      |      |     |       |      |     |      |     |      |     |      |      |      |      |     |      |      |      |      |     |     |
| -----AA---G-T-C-A-----G-A-G-G-TG--A-AA-GC--C-C-GG-G-G----CT-C-AA-----C-C-C-C-G-G-A-A-C---T-G--C-C---T-T-----T-GA-A-A--C-----T-A-G-GT-A-G-C---T-A-G-A-A-T-C---T-TG-----GA-G-A-----G-G-T-C---AG-T-----GG-A-ATT---C-  |      |     |      |     |      |     |      |      |      |     |       |      |     |      |     |      |     |      |      |      |      |     |      |      |      |      |     |     |
| C-G-A-GT--GT-A-G-AG-GT--G---A-A-A---TT-C-GT-AG--AT-A-TT-C-G--G-A-A-G-A-AC-A-CC---AG--T-G--GC-GAA-G-G-C-G-----A-C-T-G-A---CTG--G--AC-A-A-----G-T---A-T-T-GA--CG-C-T-G--A-GG--T-G-CG-A-AA-G-C---G-TG--GG-            |      |     |      |     |      |     |      |      |      |     |       |      |     |      |     |      |     |      |      |      |      |     |      |      |      |      |     |     |
| G--AG-C-A-AA-----CA--GG Bacteria(100);Proteobacteria(100);Alphaproteobacteria(100);Sphingomonadales(100);Sphingomonadaceae(100);Novosphingobium(96);unclassified(96);unclassified(96);unclassified(96);            |      |     |      |     |      |     |      |      |      |     |       |      |     |      |     |      |     |      |      |      |      |     |      |      |      |      |     |     |
| Otu0021                                                                                                                                                                                                            | 0    | 0   | 0    | 434 | 0    | 0   | 0    | 93   | 75   | 0   | 0     | 0    | 0   | 0    | 0   | 0    | 0   | 0    | 3    | 5    | 1    | 0   | 98   | 0    | 6    | 0    | 0   | 69  |
| 3                                                                                                                                                                                                                  | 0    | 0   | 0    | 0   | 0    | 35  | 106  | 0    | 3    | 0   | 98    | 73   | 78  | 190  | 134 | 0    | 0   | 0    | 0    | 0    | 2    | 1   | 0    | 52   | 137  | 0    | 1   | 0   |
| 50                                                                                                                                                                                                                 | 0    | 0   | 0    | 0   | 0    | 0   | 0    | 0    | 0    | 0   | 0     | 5    | 10  | 143  | 3   | 0    | 180 | 0    | 0    | 0    | 0    | 3   | 245  | 0    | 0    | 0    | 36  | 0   |
| 8                                                                                                                                                                                                                  | 0    | 121 | 32   | 239 | 0    | 10  | 0    | 0    | 27   | 0   | 43    | 0    | 0   | 0    | 79  | 0    | 0   | 76   | 0    | 0    | 0    | 48  | 0    | 9    | 0    | 0    |     |     |
| M02255_77_000000000-ADUT3_1_2113_17589_17344 T---AC---GG-AG-GGG-----GCT-A-G-----C-G-T---T-GT-T-CGG-AA-----TT-A-C-T-GG-GC-----GT-A---AA-GC-GC-AC-----G-TA-G-G-C-G-----G-C-TT-T-G-T-----                             |      |     |      |     |      |     |      |      |      |     |       |      |     |      |     |      |     |      |      |      |      |     |      |      |      |      |     |     |
| -----AA---G-T-T-A-----G-A-G-G-TG--A-AA-GC--C-C-GG-G-G----CT-C-AA-----C-T-C-C-G-G-A-A-T---T-G--C-C---T-T-----T-AA-G-A--C-----T-G-C-AT--C-G-C---T-T-G-A-A-C-G---T-CG-----GA-G-A-----G-G-T-A---AG-T-----GG-A-ATT---C- |      |     |      |     |      |     |      |      |      |     |       |      |     |      |     |      |     |      |      |      |      |     |      |      |      |      |     |     |
| C-G-A-GT--GT-A-G-AG-GT--G---A-A-A---TT-C-GT-AG--AT-A-TT-C-G--G-A-A-G-A-AC-A-CC---AG--T-G--GC-GAA-G-G-C-G-----A-C-T-T-A---CTG--G--AC-G-A-----C-T---G-T-T-GA--CG-C-T-G--A-GG--T-G-CG-A-AA-G-C---G-TG--GG-G-          |      |     |      |     |      |     |      |      |      |     |       |      |     |      |     |      |     |      |      |      |      |     |      |      |      |      |     |     |
| -AG-C-A-AA-----CA--GG Bacteria(100);Proteobacteria(100);Alphaproteobacteria(100);Sphingomonadales(100);Sphingomonadaceae(99);Sphingomonas(88);Sphingomonadaceae(88);Sphingomonas(88);unclassified(88);             |      |     |      |     |      |     |      |      |      |     |       |      |     |      |     |      |     |      |      |      |      |     |      |      |      |      |     |     |
| Otu0022                                                                                                                                                                                                            | 1    | 377 | 376  | 238 | 1    | 2   | 674  | 143  | 0    | 0   | 3     | 8    | 11  | 1    | 38  | 3    | 0   | 11   | 0    | 31   | 96   | 25  | 2    | 27   | 6    | 29   | 21  | 25  |
| 27                                                                                                                                                                                                                 | 1418 | 103 | 1257 | 565 | 476  | 40  | 1151 | 409  | 280  | 271 | 766   | 1767 | 281 | 473  | 360 | 999  | 470 | 0    | 431  | 835  | 2507 | 20  | 556  | 123  | 25   | 10   | 227 | 305 |
| 365                                                                                                                                                                                                                | 649  | 102 | 179  | 38  | 44   | 52  | 693  | 39   | 69   | 382 | 268   | 82   | 172 | 1022 | 226 | 22   | 111 | 951  | 2574 | 1000 | 17   | 30  | 743  | 3915 | 4796 | 1976 | 47  | 116 |
| 534                                                                                                                                                                                                                | 459  | 452 | 1049 | 857 | 7103 | 166 | 926  | 25   | 7004 | 133 | 14637 | 286  | 627 | 168  | 12  | 488  | 249 | 20   | 0    | 307  | 34   | 285 | 16   | 157  | 0    | 137  |     |     |
| M02255_77_000000000-ADUT3_1_1114_24010_5547 T---AC---GT-AT-GGA-----GCG-A-G-----C-G-T---T-GT-C-CGG-AA-----TT-A-T-T-GG-GC-----GT-A---AA-GG-GT-AC-----G-CA-G-G-C-G-----G-T-TT-A-A-T-----AA-                           |      |     |      |     |      |     |      |      |      |     |       |      |     |      |     |      |     |      |      |      |      |     |      |      |      |      |     |     |
| ---G-T-C-G-----A-A-T-G-TT--A-AA-GA--T-C-GG-G-G----CT-C-AA-----C-C-C-C-G-T-A-A---A-G--C-A--T-T-----G--GA-A-A--C-----T-G-A-TA--A-A-C---T-T-G-A-G-T-A---G-TG-----GA-G-A-----G-G-A-A---AG-T-----GG-A-ATT---C-C-T-A-    |      |     |      |     |      |     |      |      |      |     |       |      |     |      |     |      |     |      |      |      |      |     |      |      |      |      |     |     |
| GT--GT-A-G-TG-GT--G---A-A-A---TA-C-GT-AG--AT-A-TT--A-G--G-A-G-G-A-AT-A-CC---AG--T-A--GC-GAA-G-G-C-G-----A-C-T-T-T---CTG--G--AC-A-C-----A-A---A-C-T-GA--CG-C-T-G--A-GG--T-A-CG-A-AA-G-C---G-TG--GG-G--AG-C-         |      |     |      |     |      |     |      |      |      |     |       |      |     |      |     |      |     |      |      |      |      |     |      |      |      |      |     |     |
| A-AA-----CA--GG Bacteria(100);Firmicutes(100);Clostridia(100);Clostridiales(100);Family_XI_Incertae_Sedis(100);Finegoldia(100);unclassified(100);unclassified(100);unclassified(100);                              |      |     |      |     |      |     |      |      |      |     |       |      |     |      |     |      |     |      |      |      |      |     |      |      |      |      |     |     |
| Otu0023                                                                                                                                                                                                            | 174  | 80  | 0    | 3   | 0    | 131 | 12   | 0    | 0    | 0   | 0     | 1    | 0   | 144  | 14  | 0    | 1   | 19   | 23   | 76   | 388  | 24  | 27   | 0    | 46   | 887  | 277 | 310 |
| 1688                                                                                                                                                                                                               | 99   | 44  | 0    | 211 | 0    | 16  | 891  | 1719 | 1298 | 505 | 855   | 179  | 44  | 253  | 56  | 22   | 0   | 1    | 40   | 0    | 40   | 163 | 1314 | 63   | 0    | 0    | 117 | 153 |
| 1                                                                                                                                                                                                                  | 0    | 11  | 0    | 8   | 2    | 0   | 0    | 40   | 0    | 0   | 0     | 13   | 9   | 16   | 28  | 14   | 470 | 85   | 0    | 0    | 0    | 5   | 0    | 238  | 292  | 0    | 0   | 920 |
| 103                                                                                                                                                                                                                | 66   | 194 | 2202 | 57  | 3    | 6   | 0    | 0    | 26   | 0   | 0     | 0    | 0   | 0    | 0   | 2334 | 289 | 1392 | 374  | 0    | 865  | 218 | 0    | 63   | 1174 | 0    |     |     |
| M02255_77_000000000-ADUT3_1_1104_20260_18697 T---AC---GA-AG-GGG-----GCT-A-G-----C-G-T---T-GC-T-CGG-AA-----TC-A-C-T-GG-GC-----GT-A---AA-GG-GC-GC-----G-TA-G-G-C-G-----G-T-CT-T-T-T-----                             |      |     |      |     |      |     |      |      |      |     |       |      |     |      |     |      |     |      |      |      |      |     |      |      |      |      |     |     |
| -----AA---G-T-C-G-----G-G-G-G-TG--A-AA-GC--C-T-GT-G-G----CT-C-AA-----C-C-A-C-A-G-A-A-T---T-G--C-C---T-T-----C-GA-T-A--C-----T-G-G-GA-G-A-C---T-T-G-A-G-T-T---C-GG-----AA-G-A-----G-G-T-T---GG-T-----GG-A-ACT---    |      |     |      |     |      |     |      |      |      |     |       |      |     |      |     |      |     |      |      |      |      |     |      |      |      |      |     |     |
| G-C-G-A-GT--GT-A-G-AG-GT--G---A-A-A---TT-C-GT-AG--AT-A-TT--C-G--C-A-A-G-A-AC-A-CC---GG--T-G--GC-GAA-G-G-C-G-----G-C-C-A-A---CTG--G--TC-C-G-----A-C---A-C-T-GA--CG-C-T-G--A-GG--C-G-CG-A-AA-G-C---G-TG--GG-G--AG-C- |      |     |      |     |      |     |      |      |      |     |       |      |     |      |     |      |     |      |      |      |      |     |      |      |      |      |     |     |
| GG-G--AG-C-A-AA-----CA--GG Bacteria(100);Proteobacteria(100);Alphaproteobacteria(100);Rhizobiales(100);Methylobacteriaceae(100);Methylobacterium(100);unclassified(100);unclassified(100);unclassified(100);       |      |     |      |     |      |     |      |      |      |     |       |      |     |      |     |      |     |      |      |      |      |     |      |      |      |      |     |     |
| Otu0024                                                                                                                                                                                                            | 0    | 0   | 0    | 0   | 0    | 0   | 0    | 0    | 0    | 0   | 2     | 9    | 34  | 8    | 5   | 28   | 2   | 39   | 24   | 62   | 8    | 99  | 1    | 23   | 6    | 0    | 25  | 2   |
| 17                                                                                                                                                                                                                 | 0    | 0   | 1    | 0   | 0    | 0   | 0    | 0    | 0    | 0   | 0     | 0    | 0   | 0    | 0   | 0    | 0   | 0    | 0    | 0    | 0    | 0   | 0    | 0    | 0    | 0    | 0   | 0   |
| 29                                                                                                                                                                                                                 | 1    | 0   | 4    | 99  | 37   | 22  | 2    | 10   | 0    | 11  | 154   | 181  | 39  | 6    | 2   | 3    | 2   | 1    | 1    | 0    | 9    | 7   | 0    | 0    | 0    | 0    | 0   | 0   |
| 0                                                                                                                                                                                                                  | 0    | 0   | 1    | 0   | 0    | 0   | 12   | 2    | 0    | 26  | 0     | 32   | 0   | 37   | 0   | 0    | 0   | 0    | 0    | 0    | 0    | 0   | 0    | 1    | 0    | 1    |     |     |
| M02255_77_000000000-ADUT3_1_2102_8514_23781 T---GC---CA-GC-AGC-----CGC-G-G-----T-A-A---T-AC-G-GAG-GA-----TC-C--A-A-GC-GT-----TA-T---CC-GG-AA-TC-----A-TA-G-G-C-G-----G-T-CA-G-A-T-----AA-                          |      |     |      |     |      |     |      |      |      |     |       |      |     |      |     |      |     |      |      |      |      |     |      |      |      |      |     |     |
| ---G-T-C-A-----G-T-G-G-TG--A-AA-GC--C-C-AT-C-G----CT-C-AA-----C-G-G-T-G-G-A-A-C---G-G--C-C---A-T-----T-GA-T-A--C-----T-G-T-CT--G-A-C---T-T-G-A-A-T-T---A-TT-----AG-G-A-----A-G-T-A--AC-T-----AG-A-ATA---T-G-T-A-   |      |     |      |     |      |     |      |      |      |     |       |      |     |      |     |      |     |      |      |      |      |     |      |      |      |      |     |     |
| GT--GT-A-G-CG-GT--G---A-A-A---TG-C-TT-AG--AG-A-TT-A-C--A-T-G-G-A-AT-A-CC---AA--T-T-GC-GAA-G-G-C-A-----G-G-T-T-A---CTA--C--TA-A-T-----A-T---A-T-T-GA--CG-C-T-G--A-TG--G-A-CG-A-AA-G-C---G-TG--GG-T--AG-C-           |      |     |      |     |      |     |      |      |      |     |       |      |     |      |     |      |     |      |      |      |      |     |      |      |      |      |     |     |
| G-AA-----CA--GG Bacteria(100);Bacteroidetes(100);Flavobacteria(100);Flavobacteriales(100);Flavobacteriaceae(100);Flavobacterium(100);unclassified(100);unclassified(100);unclassified(100);                        |      |     |      |     |      |     |      |      |      |     |       |      |     |      |     |      |     |      |      |      |      |     |      |      |      |      |     |     |



|                                                                                                                                                                                                                                                                                                                                                                                                                                                                                                                                                                                                                                                                                                                                                                                                                                           |     |      |      |     |     |     |      |     |      |     |     |      |     |    |     |    |     |     |     |     |     |     |     |      |      |    |      |    |     |
|-------------------------------------------------------------------------------------------------------------------------------------------------------------------------------------------------------------------------------------------------------------------------------------------------------------------------------------------------------------------------------------------------------------------------------------------------------------------------------------------------------------------------------------------------------------------------------------------------------------------------------------------------------------------------------------------------------------------------------------------------------------------------------------------------------------------------------------------|-----|------|------|-----|-----|-----|------|-----|------|-----|-----|------|-----|----|-----|----|-----|-----|-----|-----|-----|-----|-----|------|------|----|------|----|-----|
| Otu0025                                                                                                                                                                                                                                                                                                                                                                                                                                                                                                                                                                                                                                                                                                                                                                                                                                   | 0   | 1487 | 2083 | 0   | 1   | 29  | 2176 | 401 | 3591 | 0   | 0   | 0    | 6   | 14 | 0   | 0  | 0   | 0   | 0   | 1   | 0   | 18  | 11  | 0    | 0    | 0  | 9    |    |     |
|                                                                                                                                                                                                                                                                                                                                                                                                                                                                                                                                                                                                                                                                                                                                                                                                                                           | 0   | 0    | 101  | 251 | 0   | 19  | 0    | 0   | 0    | 0   | 525 | 0    | 72  | 0  | 43  | 0  | 0   | 0   | 48  | 0   | 0   | 0   | 0   | 1    | 0    | 0  |      |    |     |
|                                                                                                                                                                                                                                                                                                                                                                                                                                                                                                                                                                                                                                                                                                                                                                                                                                           | 0   | 0    | 0    | 0   | 0   | 0   | 0    | 0   | 0    | 0   | 1   | 11   | 1   | 50 | 22  | 69 | 323 | 0   | 0   | 0   | 5   | 4   | 1   | 0    | 0    | 57 | 57   |    |     |
|                                                                                                                                                                                                                                                                                                                                                                                                                                                                                                                                                                                                                                                                                                                                                                                                                                           | 0   | 0    | 0    | 22  | 0   | 30  | 40   | 0   | 1    | 37  | 0   | 144  | 0   | 0  | 0   | 0  | 0   | 0   | 1   | 1   | 37  | 48  | 69  | 1277 | 1230 | 37 |      |    |     |
| M02255_77_000000000-ADUT3_1_1105_11899_8025 T---AC---GT-AT-GGT-----GCA-A-G-----C-G--T---T-AT-C-CGG-AT-----TT-A--C-T-GG-GT-----GT-A-----AA-GG-GA-GC-----G-CA-G-G-C-G-----G--T-GC-G-G-C-----AA-<br>---G-T-C-T-----G-A-T--G--TG--A-AA-GC--C-C-GG-G-G----CT-C-AA-----C-C-C-C-G-G-T-A-C---T-G--C-A---T-T-----G--GA-A-A--C-----T-G-T--CG--T-A-C---T-A-G-A-G-T-G--T-CG-----GA-G-G-----G-G-T-A--AG-T-----GG--A--ATT---C-C-T-A-<br>GT--GT-A-G-CG-GT--G---A-A-A---TG-C-GT-AG--AT-A-TT--A-G--G-A-G-G-A-AC-A-CC---AG--T-G--GC-GAA-G--G-C-G-----G--C-T-T-A---CTG--G--AC-G-A-----T-A--A-C-T--GA--CG-C-T-G--A-GG--C-T-CG-A--AA-G-C---G-TG--GG-G--AG-<br>C-A-AA-----CA--GG Bacteria(100);Firmicutes(100);Clostridia(100);Clostridiales(100);Lachnospiraceae(100);Roseburia(97);unclassified(97);unclassified(97);unclassified(97);                        |     |      |      |     |     |     |      |     |      |     |     |      |     |    |     |    |     |     |     |     |     |     |     |      |      |    |      |    |     |
| Otu0026                                                                                                                                                                                                                                                                                                                                                                                                                                                                                                                                                                                                                                                                                                                                                                                                                                   | 0   | 0    | 0    | 66  | 0   | 46  | 41   | 1   | 0    | 0   | 0   | 0    | 0   | 0  | 0   | 10 | 0   | 0   | 0   | 16  | 112 | 2   | 0   | 15   | 13   | 9  | 0    | 7  |     |
|                                                                                                                                                                                                                                                                                                                                                                                                                                                                                                                                                                                                                                                                                                                                                                                                                                           | 0   | 15   | 174  | 60  | 41  | 0   | 236  | 79  | 0    | 283 | 171 | 316  | 103 | 0  | 0   | 5  | 116 | 0   | 125 | 0   | 33  | 0   | 124 | 0    | 0    | 0  | 46   | 0  |     |
|                                                                                                                                                                                                                                                                                                                                                                                                                                                                                                                                                                                                                                                                                                                                                                                                                                           | 165 | 90   | 0    | 45  | 0   | 9   | 4    | 45  | 8    | 34  | 23  | 34   | 1   | 20 | 298 | 6  | 0   | 0   | 873 | 894 | 291 | 0   | 10  | 47   | 68   | 0  | 1052 | 67 | 109 |
|                                                                                                                                                                                                                                                                                                                                                                                                                                                                                                                                                                                                                                                                                                                                                                                                                                           | 92  | 0    | 0    | 122 | 843 | 741 | 83   | 74  | 0    | 876 | 28  | 1042 | 9   | 96 | 2   | 0  | 199 | 58  | 0   | 1   | 0   | 0   | 189 | 0    | 0    | 0  | 0    |    |     |
| M02255_77_000000000-ADUT3_1_1107_19234_16567 T---AC---GT-AT-GGA-----CCG-A-G-----C-G--T---T--GT-C-CGG-AA-----TC-A--T-T-GG-GC-----GT-A-----AA-GG-GT-AC-----G-TA-G-G-C-G-----G--C-CT-A-G-T-----<br>-----AA---G-T-T-A-----G-A-A--G--TG--A-AA-TA--A-T-AT-A-G---CT-C-AA-----C-T-A-T-A-T-A-A---A-G--C-T---T-T-----T-AA-A-A--C-----T-G-T--TA--G-G-C---T-T-G-A-G-A--G--A-TG-----AA-A-G-----G-G-A-A--AG-T-----GG--A--ATT---C-<br>C-T-A-GT--GT-A-G-CG-GT--G---A-A-A---TG-C-GC-AG--AT-A-TT--A-G--G-A-A-G-A-AT-A-CC---GG--T-G--GC-GAA-G--G-C-G-----A--C-T-T-T---CTG--G--TC-A-T-----C-A--T-C-T--GA--CG-C-T-G--A-GG--T-A-CG-A--AA-G-C---G-TG--GG-T--<br>AG-C-A-AA-----CA--GG Bacteria(100);Firmicutes(100);Clostridia(100);Clostridiales(100);Family_XI_Incertae_Sedis(100);Anaerococcus(98);unclassified(98);unclassified(98);unclassified(98);         |     |      |      |     |     |     |      |     |      |     |     |      |     |    |     |    |     |     |     |     |     |     |     |      |      |    |      |    |     |
| Otu0027                                                                                                                                                                                                                                                                                                                                                                                                                                                                                                                                                                                                                                                                                                                                                                                                                                   | 42  | 0    | 75   | 9   | 153 | 0   | 7    | 55  | 0    | 0   | 1   | 0    | 0   | 0  | 3   | 0  | 6   | 1   | 1   | 6   | 21  | 0   | 0   | 0    | 4    | 0  | 0    | 0  |     |
|                                                                                                                                                                                                                                                                                                                                                                                                                                                                                                                                                                                                                                                                                                                                                                                                                                           | 6   | 6    | 5    | 36  | 42  | 65  | 0    | 67  | 126  | 98  | 68  | 5    | 54  | 82 | 45  | 61 | 18  | 19  | 0   | 19  | 58  | 0   | 1   | 0    | 14   | 0  | 0    | 8  | 0   |
|                                                                                                                                                                                                                                                                                                                                                                                                                                                                                                                                                                                                                                                                                                                                                                                                                                           | 0   | 9    | 0    | 0   | 0   | 0   | 0    | 5   | 0    | 2   | 1   | 4    | 5   | 1  | 37  | 0  | 36  | 31  | 0   | 25  | 22  | 18  | 18  | 90   | 54   | 0  | 1    | 19 | 0   |
|                                                                                                                                                                                                                                                                                                                                                                                                                                                                                                                                                                                                                                                                                                                                                                                                                                           | 67  | 24   | 84   | 40  | 101 | 0   | 0    | 12  | 0    | 10  | 2   | 0    | 0   | 38 | 0   | 47 | 49  | 103 | 0   | 7   | 0   | 146 | 21  | 7    | 9    | 0  | 0    |    |     |
| M02255_77_000000000-ADUT3_1_1108_17404_7563 T---AC---GT-AG-GGT-----GCG-A-G-----C-G--T---T--GT-C-CGG-AA-----TT-A--T-T-GG-GC-----GT-A-----AA-GA-GC-TT-----G-TA-G-G-C-G-----G--T-TT-G-T-C-----GC-<br>--G-T-C-T-----G-C-T--G--TG--A-AA-AT--C-C-GG-G-G----CT-C-AA-----C-C-C-C-G-G-A-C-T---T-G--C-A--G-T-----G--GG-T-A--C-----G--G-G--CA--G-A-C---T-A-G-A-G-T-G--T-GG-----TA-G-G-----G-G-A-G--AC-T-----GG--A--ATT---C-C-T-G-<br>GT--GT-A-G-CG-GT--G---A-A-A---TG-C-GC-AG--AT-A-TC--A-G--G-A-G-G-A-AC-A-CC---GA--T-G--GC-GAA-G--G-C-A-----G--G-T-C-T---CTG--G--GC-C-A-----C-T--A-C-T--GA--CG-C-T-G--A-GA--A-G-CG-A--AA-G-C---A-TG--GG-G--AG-<br>C-G-AA-----CA--GG Bacteria(100);Actinobacteria(100);Actinobacteria(100);Actinobacteridae(100);Actinomycetales(100);Micrococcineae(100);Intrasporangiaceae(98);unclassified(62);unclassified(62); |     |      |      |     |     |     |      |     |      |     |     |      |     |    |     |    |     |     |     |     |     |     |     |      |      |    |      |    |     |
| Otu0028                                                                                                                                                                                                                                                                                                                                                                                                                                                                                                                                                                                                                                                                                                                                                                                                                                   | 0   | 0    | 0    | 0   | 0   | 0   | 0    | 0   | 0    | 0   | 1   | 0    | 45  | 12 | 1   | 2  | 5   | 6   | 0   | 1   | 4   | 13  | 0   | 0    | 0    | 0  | 1    | 0  |     |
|                                                                                                                                                                                                                                                                                                                                                                                                                                                                                                                                                                                                                                                                                                                                                                                                                                           | 2   | 1    | 0    | 2   | 2   | 1   | 1    | 6   | 0    | 1   | 1   | 3    | 2   | 0  | 0   | 0  | 1   | 0   | 10  | 0   | 0   | 7   | 1   | 6    | 70   | 69 | 27   | 0  |     |
|                                                                                                                                                                                                                                                                                                                                                                                                                                                                                                                                                                                                                                                                                                                                                                                                                                           | 21  | 2    | 19   | 1   | 11  | 0   | 8    | 22  | 8    | 40  | 18  | 10   | 18  | 76 | 1   | 2  | 0   | 1   | 0   | 1   | 0   | 0   | 1   | 0    | 0    | 0  | 0    | 0  |     |



|                                                                                                                                                                                                                        |     |     |     |     |     |     |     |     |      |     |      |      |     |     |    |     |     |     |      |     |     |      |     |     |     |      |     |     |
|------------------------------------------------------------------------------------------------------------------------------------------------------------------------------------------------------------------------|-----|-----|-----|-----|-----|-----|-----|-----|------|-----|------|------|-----|-----|----|-----|-----|-----|------|-----|-----|------|-----|-----|-----|------|-----|-----|
| Otu0030                                                                                                                                                                                                                | 53  | 65  | 64  | 294 | 154 | 129 | 120 | 168 | 40   | 19  | 0    | 2    | 0   | 0   | 1  | 0   | 0   | 3   | 2    | 12  | 47  | 4    | 1   | 0   | 0   | 12   | 0   | 72  |
| 21                                                                                                                                                                                                                     | 281 | 174 | 130 | 174 | 25  | 184 | 48  | 60  | 115  | 163 | 0    | 30   | 106 | 162 | 73 | 14  | 40  | 0   | 6    | 200 | 180 | 1    | 146 | 30  | 76  | 0    | 56  | 26  |
| 26                                                                                                                                                                                                                     | 69  | 37  | 5   | 22  | 7   | 0   | 0   | 7   | 6    | 0   | 0    | 8    | 1   | 86  | 68 | 133 | 94  | 60  | 101  | 9   | 12  | 4    | 41  | 31  | 0   | 0    | 201 | 248 |
| 137                                                                                                                                                                                                                    | 134 | 166 | 229 | 333 | 62  | 11  | 33  | 0   | 129  | 3   | 13   | 5    | 106 | 0   | 16 | 84  | 255 | 27  | 266  | 375 | 152 | 115  | 9   | 76  | 103 | 324  |     |     |
| M02255_76_000000000-ADUNE_1_1109_26206_17835                                                                                                                                                                           |     |     |     |     |     |     |     |     |      |     |      |      |     |     |    |     |     |     |      |     |     |      |     |     |     |      |     |     |
| .....AC---T-AC-GT-----GCC-A-G-----C-A-G---C-CG-C-GGT-AA-----TA-C-G-T--AG-GT-----GG--C---AA-GC-G--TT-----G---T-C-C-G-----G--A-TC-C-T-T-----                                                                             |     |     |     |     |     |     |     |     |      |     |      |      |     |     |    |     |     |     |      |     |     |      |     |     |     |      |     |     |
| AA---G-T-C-T-----G-A-T--G--TG--A-AA-GC--C-C-CC-G-G----CT-C-AA-----C-C-G-G-G-G-A--G-G---G-T--C-A--T--T-----G--GA-A-A--C-----T-G-G--GG--A-A-C---T-T-G-A-G-T--G--C-AG----AA-G-A-----G-G-A-G--AG-T-----GG--A--ATT---C-C-   |     |     |     |     |     |     |     |     |      |     |      |      |     |     |    |     |     |     |      |     |     |      |     |     |     |      |     |     |
| A-T-GT--GT-A-G-CG-GT--G---A-A-A---TG-C-GT-AG--AT-A-TA--T-G--G-A-G-G-A-AC-A-CC--AG--T--G--GC-GAA-G--G-C-G-----A-C-T-C-T---CTG--G--TC-T-G-----T-A--A-C-T--GA--CG-C-T-G--A-GG--C-T-CG-A--AA-G-C---G-TG--GG-T--            |     |     |     |     |     |     |     |     |      |     |      |      |     |     |    |     |     |     |      |     |     |      |     |     |     |      |     |     |
| AG-C-A-AA-----CA--GG                                                                                                                                                                                                   |     |     |     |     |     |     |     |     |      |     |      |      |     |     |    |     |     |     |      |     |     |      |     |     |     |      |     |     |
| Bacteria(100);Firmicutes(100);Bacilli(100);Lactobacillales(100);unclassified(100);unclassified(100);unclassified(100);unclassified(100);unclassified(100);                                                             |     |     |     |     |     |     |     |     |      |     |      |      |     |     |    |     |     |     |      |     |     |      |     |     |     |      |     |     |
| Otu0031                                                                                                                                                                                                                | 0   | 0   | 0   | 0   | 0   | 169 | 51  | 0   | 0    | 0   | 2    | 0    | 7   | 0   | 0  | 0   | 0   | 2   | 0    | 2   | 8   | 1    | 0   | 0   | 0   | 8    | 0   | 0   |
| 2                                                                                                                                                                                                                      | 2   | 0   | 184 | 0   | 77  | 0   | 0   | 248 | 32   | 1   | 128  | 483  | 0   | 83  | 50 | 92  | 0   | 0   | 120  | 0   | 763 | 13   | 204 | 23  | 5   | 0    | 0   | 834 |
| 94                                                                                                                                                                                                                     | 76  | 0   | 19  | 0   | 6   | 3   | 115 | 0   | 2    | 91  | 46   | 3    | 18  | 322 | 38 | 0   | 36  | 323 | 1009 | 263 | 0   | 1    | 0   | 146 | 0   | 1376 | 0   | 110 |
| 38                                                                                                                                                                                                                     | 82  | 0   | 80  | 97  | 716 | 50  | 61  | 4   | 1087 | 16  | 1476 | 0    | 48  | 5   | 0  | 0   | 0   | 0   | 45   | 0   | 0   | 115  | 4   | 85  | 0   | 0    |     |     |
| M02255_76_000000000-ADUNE_1_1108_22434_20789                                                                                                                                                                           |     |     |     |     |     |     |     |     |      |     |      |      |     |     |    |     |     |     |      |     |     |      |     |     |     |      |     |     |
| T---AC---GT-AG-GGG-----GCG-A-G-----C-G-T---T-GT-C-CGG-AA-----TT-A-C-T--GG-GC-----GT--A---AA-GG-GT-TC-----G-CA-G-G-C-----A-T--G-G-C-----                                                                                |     |     |     |     |     |     |     |     |      |     |      |      |     |     |    |     |     |     |      |     |     |      |     |     |     |      |     |     |
| ---AA---G-T-C-C-----G-A-T--G--TA--A-AA-GG--C-G-AA-A-G----CT-C-AA-----C-T-T-T-C-G-T-A-----A-G--C-A--T--C-----G--GA-A-A--C-----T-G-T--CA--A-G-C---T-T-G-A-G-T--G--A-AG----GA-G-A-----G-G-C-A--AG-T-----GG--A--ATT---C-C- |     |     |     |     |     |     |     |     |      |     |      |      |     |     |    |     |     |     |      |     |     |      |     |     |     |      |     |     |
| T-A-GT--GT-A-G-CG-GT--G---G--A-A---TG-C-GT-AG--AT-A-TT--A-G--G-A-G-G-A-AT-A-CC--GG--T--G--GC-GAA-G--G-C-G-----A-C-T-T-G---CTG--G--AC-T-T-----C-A--A-C-T--GA--CG-C-T-G--A-GG--A-A-CG-A--AA-G-C---G-TG--GG-T--           |     |     |     |     |     |     |     |     |      |     |      |      |     |     |    |     |     |     |      |     |     |      |     |     |     |      |     |     |
| AG-C-A-AA-----CA--GG                                                                                                                                                                                                   |     |     |     |     |     |     |     |     |      |     |      |      |     |     |    |     |     |     |      |     |     |      |     |     |     |      |     |     |
| Bacteria(100);Firmicutes(100);Clostridia(100);Clostridiales(100);Family_XI_Incertae_Sedis(100);Peptoniphilus(100);unclassified(100);unclassified(100);unclassified(100);                                               |     |     |     |     |     |     |     |     |      |     |      |      |     |     |    |     |     |     |      |     |     |      |     |     |     |      |     |     |
| Otu0032                                                                                                                                                                                                                | 0   | 0   | 0   | 0   | 0   | 0   | 0   | 0   | 0    | 20  | 0    | 0    | 0   | 0   | 0  | 0   | 0   | 0   | 75   | 2   | 0   | 0    | 0   | 0   | 0   | 0    | 29  | 0   |
| 0                                                                                                                                                                                                                      | 0   | 0   | 0   | 0   | 0   | 0   | 1   | 0   | 0    | 0   | 0    | 0    | 0   | 38  | 0  | 0   | 0   | 0   | 0    | 0   | 0   | 2353 | 0   | 563 | 109 | 4    | 0   | 0   |
| 0                                                                                                                                                                                                                      | 0   | 0   | 0   | 0   | 0   | 0   | 0   | 0   | 0    | 0   | 1    | 0    | 0   | 0   | 0  | 4   | 8   | 0   | 0    | 0   | 0   | 0    | 0   | 18  | 0   | 0    | 0   | 0   |
| 17                                                                                                                                                                                                                     | 0   | 0   | 0   | 0   | 9   | 0   | 0   | 435 | 0    | 15  | 0    | 0    | 0   | 0   | 0  | 0   | 0   | 0   | 0    | 0   | 0   | 0    | 0   | 0   | 0   | 0    |     |     |
| M02255_76_000000000-ADUNE_1_1111_9116_17641                                                                                                                                                                            |     |     |     |     |     |     |     |     |      |     |      |      |     |     |    |     |     |     |      |     |     |      |     |     |     |      |     |     |
| T---CG---GC-TA-ACT-----CCG-T-GC-----C-A-G---C--AG-C-CGC-GG-----TA-A--T-A--CG-GA-----GG--A---TC-CA-AG-CG-----T-TA-T-C-C-G-----GA-T-TT-A-T-T-----AA-                                                                     |     |     |     |     |     |     |     |     |      |     |      |      |     |     |    |     |     |     |      |     |     |      |     |     |     |      |     |     |
| ---G-T-C-A-----G-G-G--G--TG--A-AA-GA--C-G-GT-G-G----CT-C-AA-----C-C-A-T-C-G-C-A-G---T-G--C-C--C-T-----T--GA-T-A--C-----T--G-A--TG--A-G-C---T-T-G-A-A-T--A--C-AC---TA-G-A-----G-G-T-A--GG-C-----GG--A--ATG---T-G-A-C-   |     |     |     |     |     |     |     |     |      |     |      |      |     |     |    |     |     |     |      |     |     |      |     |     |     |      |     |     |
| AA--GT-A-G-CG-GT--G---A--A-A---TG-C-AT-AG--AT-A-TG--T-C--A-C-A-G-A-AC-A-CC--GA--T--T--GC-GAA-G--G-C-A-----G--C-T-T-A--CTA--T--GG-T-G-----T-T--A-T-T--GA--CG-C-T-G--A-GG--C-A-CG-A--AA-G-C---G-TG--GG-G--AT-C-          |     |     |     |     |     |     |     |     |      |     |      |      |     |     |    |     |     |     |      |     |     |      |     |     |     |      |     |     |
| A-AA-----CA--GG                                                                                                                                                                                                        |     |     |     |     |     |     |     |     |      |     |      |      |     |     |    |     |     |     |      |     |     |      |     |     |     |      |     |     |
| Bacteria(100);Bacteroidetes(100);Sphingobacteria(100);Sphingobacteriales(100);Sphingobacteriaceae(100);Sphingobacteriaceae(100);Pedobacter(96);unclassified(96);unclassified(96);                                      |     |     |     |     |     |     |     |     |      |     |      |      |     |     |    |     |     |     |      |     |     |      |     |     |     |      |     |     |
| Otu0033                                                                                                                                                                                                                | 0   | 0   | 0   | 565 | 145 | 86  | 315 | 581 | 188  | 240 | 3    | 0    | 0   | 0   | 15 | 2   | 0   | 0   | 0    | 9   | 41  | 0    | 0   | 6   | 0   | 0    | 0   | 20  |
| 0                                                                                                                                                                                                                      | 0   | 87  | 84  | 0   | 0   | 28  | 506 | 267 | 79   | 142 | 365  | 1479 | 44  | 0   | 90 | 555 | 0</ |     |      |     |     |      |     |     |     |      |     |     |



|         |                                                                                                                                                                                                                           |     |     |     |     |     |     |     |     |     |     |     |     |     |     |     |     |     |    |     |     |     |    |     |     |    |     |     |     |
|---------|---------------------------------------------------------------------------------------------------------------------------------------------------------------------------------------------------------------------------|-----|-----|-----|-----|-----|-----|-----|-----|-----|-----|-----|-----|-----|-----|-----|-----|-----|----|-----|-----|-----|----|-----|-----|----|-----|-----|-----|
| Otu0035 | 24                                                                                                                                                                                                                        | 0   | 0   | 54  | 0   | 0   | 0   | 33  | 0   | 0   | 0   | 14  | 0   | 13  | 1   | 0   | 0   | 0   | 5  | 2   | 0   | 1   | 18 | 0   | 0   | 0  | 2   | 2   |     |
|         | 0                                                                                                                                                                                                                         | 0   | 5   | 65  | 0   | 0   | 22  | 0   | 10  | 23  | 50  | 0   | 45  | 90  | 0   | 0   | 29  | 0   | 27 | 0   | 0   | 0   | 51 | 7   | 12  | 0  | 0   | 0   |     |
|         | 0                                                                                                                                                                                                                         | 0   | 0   | 0   | 12  | 0   | 0   | 0   | 10  | 0   | 0   | 0   | 2   | 13  | 26  | 51  | 15  | 0   | 0  | 0   | 7   | 21  | 0  | 0   | 0   | 0  | 0   | 0   |     |
|         | 0                                                                                                                                                                                                                         | 0   | 36  | 0   | 0   | 0   | 14  | 0   | 146 | 0   | 0   | 9   | 0   | 0   | 0   | 0   | 39  | 11  | 0  | 0   | 0   | 20  | 5  | 0   | 0   | 0  |     |     |     |
|         | M02255_77_000000000-ADUT3_1_2118_18625_11352                                                                                                                                                                              |     |     |     |     |     |     |     |     |     |     |     |     |     |     |     |     |     |    |     |     |     |    |     |     |    |     |     |     |
|         | T---AC---GT-AG-GGT-----GCA-A-G-----C-G--T--T--AT-C-CGG-AA-----TT-A--T-T--GG-GC-----GT--A----AA-GA-GC-TC-----G-TA-G-G-C-G-----G--T-TT-G-T-C-----                                                                           |     |     |     |     |     |     |     |     |     |     |     |     |     |     |     |     |     |    |     |     |     |    |     |     |    |     |     |     |
|         | -----GC---G-T-C-T-----G-C-T--G--TG--A-AA-AC--T-G-GA-G-G-----CT-C-AA-----C-C-T-C-C-A-G--C-C---T-G--C-A--G--T-----G--GG-T-A--C-----G--G-G--CA-G-A-C---T-A-G-A-G-T--G--C-GG-----TA-G-G-----G-G-A-G--AT-T-----GG--A--ATT---C- |     |     |     |     |     |     |     |     |     |     |     |     |     |     |     |     |     |    |     |     |     |    |     |     |    |     |     |     |
|         | C-T-G-GT--GT-A-G-CG-GT--G---G--A-A---TG-C-GC-AG--AT-A-TC--A-G--G-A-G-G-A-AC-A-CC--GA--T--G--GC-GAA-G--G-C-A-----G--A-T-C-T--CTG--G--GC-C-G-----T-A--A-C-T--GA--CG-C-T-G--A-GG--A-G-CG-A-AA-G-C---A-TG--GG-                |     |     |     |     |     |     |     |     |     |     |     |     |     |     |     |     |     |    |     |     |     |    |     |     |    |     |     |     |
|         | G--AG-C-G-AA-----CA--GG                                                                                                                                                                                                   |     |     |     |     |     |     |     |     |     |     |     |     |     |     |     |     |     |    |     |     |     |    |     |     |    |     |     |     |
|         | Bacteria(100);Actinobacteria(100);Actinobacteria(100);Actinobacteridae(100);Actinomycetales(100);Micrococcineae(100);Microbacteriaceae(100);unclassified(100);unclassified(100);                                          |     |     |     |     |     |     |     |     |     |     |     |     |     |     |     |     |     |    |     |     |     |    |     |     |    |     |     |     |
| Otu0036 | 555                                                                                                                                                                                                                       | 713 | 112 | 474 | 0   | 462 | 262 | 521 | 1   | 60  | 5   | 0   | 10  | 54  | 8   | 4   | 2   | 14  | 10 | 46  | 153 | 11  | 20 | 35  | 18  | 33 | 5   | 48  |     |
|         | 23                                                                                                                                                                                                                        | 267 | 303 | 121 | 500 | 484 | 29  | 441 | 193 | 543 | 598 | 241 | 203 | 307 | 470 | 443 | 940 | 398 | 16 | 167 | 87  | 23  | 69 | 197 | 143 | 13 | 0   | 47  | 849 |
|         | 22                                                                                                                                                                                                                        | 311 | 115 | 39  | 11  | 39  | 27  | 0   | 29  | 5   | 16  | 4   | 10  | 7   | 65  | 30  | 18  | 63  | 65 | 78  | 3   | 38  | 11 | 368 | 383 | 0  | 461 | 150 | 0   |
|         | 43                                                                                                                                                                                                                        | 174 | 138 | 111 | 291 | 405 | 22  | 48  | 5   | 498 | 25  | 408 | 156 | 225 | 0   | 44  | 0   | 223 | 0  | 320 | 0   | 137 | 19 | 17  | 264 | 2  | 47  |     |     |
|         | M02255_77_000000000-ADUT3_1_1101_14023_13075                                                                                                                                                                              |     |     |     |     |     |     |     |     |     |     |     |     |     |     |     |     |     |    |     |     |     |    |     |     |    |     |     |     |
|         | T---AC---GT-AA-GGA-----CCG-A-G-----C-G--T--T--GT-C-CGG-AA-----TC-A--T-T--GG-GC-----GT--A----AA-GG-GT-AC-----G-TA-G-G-C-G-----G--C-TA-G-A-A-----                                                                           |     |     |     |     |     |     |     |     |     |     |     |     |     |     |     |     |     |    |     |     |     |    |     |     |    |     |     |     |
|         | -----AA---G-T-T-A-----G-A-A--G--TC--A-AA-GG--C-T-AT-A-G-----CT-C-AA-----C-T-A-T-A-G-T-A-----A-G--C-T--T-C-----T--AA-A-A--C-----T--A-T-TT--A-G-C---T-T-G-A-G-A--A--A-TG---GA-A-G-----G-G-A-A--AG-T-----GG--A--ATT---C-     |     |     |     |     |     |     |     |     |     |     |     |     |     |     |     |     |     |    |     |     |     |    |     |     |    |     |     |     |
|         | C-T-A-GT--GT-A-G-CG-GT--G---G--A-A---TG-C-GC-AG--AT-A-TT--A-G--G-A-A-G-A-AT-A-CC--GG--T--G--GC-GAA-G--G-C-G-----A--C-T-T-T--CTG--G--CC-A-T-----T-A--T-C-T--GA--CG-C-T-G--A-GG--T-A-CG-A-AA-G-C---G-TG--GG-T--             |     |     |     |     |     |     |     |     |     |     |     |     |     |     |     |     |     |    |     |     |     |    |     |     |    |     |     |     |
|         | AG-C-A-AA-----CA--GG                                                                                                                                                                                                      |     |     |     |     |     |     |     |     |     |     |     |     |     |     |     |     |     |    |     |     |     |    |     |     |    |     |     |     |
|         | Bacteria(100);Firmicutes(100);Clostridia(100);Clostridiales(100);Family_XI_Incertae_Sedis(100);Anaerococcus(100);unclassified(100);unclassified(100);unclassified(100);                                                   |     |     |     |     |     |     |     |     |     |     |     |     |     |     |     |     |     |    |     |     |     |    |     |     |    |     |     |     |
| Otu0037 | 27                                                                                                                                                                                                                        | 0   | 0   | 9   | 0   | 0   | 2   | 0   | 3   | 0   | 0   | 3   | 0   | 15  | 0   | 0   | 0   | 0   | 0  | 3   | 6   | 1   | 13 | 24  | 0   | 0  | 0   | 0   |     |
|         | 0                                                                                                                                                                                                                         | 70  | 37  | 0   | 48  | 34  | 36  | 85  | 430 | 34  | 21  | 19  | 30  | 28  | 49  | 494 | 126 | 116 | 0  | 7   | 37  | 0   | 0  | 26  | 2   | 0  | 4   | 8   | 0   |
|         | 0                                                                                                                                                                                                                         | 6   | 6   | 0   | 8   | 0   | 0   | 0   | 1   | 1   | 0   | 2   | 0   | 0   | 0   | 0   | 7   | 9   | 10 | 0   | 11  | 6   | 30 | 63  | 0   | 0  | 41  | 42  |     |
|         | 0                                                                                                                                                                                                                         | 15  | 0   | 17  | 7   | 15  | 0   | 2   | 0   | 29  | 0   | 29  | 5   | 1   | 0   | 13  | 2   | 0   | 0  | 0   | 0   | 13  | 0  | 1   | 0   | 0  | 0   |     |     |
|         | M02255_77_000000000-ADUT3_1_1114_21315_17096                                                                                                                                                                              |     |     |     |     |     |     |     |     |     |     |     |     |     |     |     |     |     |    |     |     |     |    |     |     |    |     |     |     |
|         | T---AC---GT-AG-GGT-----GCG-A-G-----C-G--T--T--GT-C-CGG-AA-----TT-A--C-T--GG-GC-----GT--A----AA-GA-GC-TC-----G-TA-G-G-C-G-----G--T-TT-G-T-C-----                                                                           |     |     |     |     |     |     |     |     |     |     |     |     |     |     |     |     |     |    |     |     |     |    |     |     |    |     |     |     |
|         | -----AC---G-T-C-G-----G-C-T--G--TG--A-AA-TC--C-T-AG-G-G-----CT-T-AA-----C-C-C-T-G-G-A--C-G---T-G--C-A--G--G-----C--GA-T-A--C-----G--G-G--CT--G-A-C---T-T-G-A-G-T--A--C-TA---CA-G-G-----G-G-A-G--AC-T-----GG--A--ATT---T-  |     |     |     |     |     |     |     |     |     |     |     |     |     |     |     |     |     |    |     |     |     |    |     |     |    |     |     |     |
|         | C-T-G-GT--GT-A-G-CG-GT--G---G--A-A---TG-C-AC-AG--AT-A-TC--A-G--G-A-A-G-A-AC-A-CC--GA--T--G--GC-GAA-G--G-C-A-----G--G-T-C-T--CTG--G--GT-A-G-----T-A--A-C-T--GA--CG-C-T-G--A-GG--A-G-CG-A-AA-G-C---A-TG--GG-                |     |     |     |     |     |     |     |     |     |     |     |     |     |     |     |     |     |    |     |     |     |    |     |     |    |     |     |     |
|         | T--AG-C-G-AA-----CA--GG                                                                                                                                                                                                   |     |     |     |     |     |     |     |     |     |     |     |     |     |     |     |     |     |    |     |     |     |    |     |     |    |     |     |     |
|         | Bacteria(100);Actinobacteria(100);Actinobacteria(100);Actinobacteridae(100);Actinomycetales(100);unclassified(100);unclassified(100);unclassified(100);unclassified(100);                                                 |     |     |     |     |     |     |     |     |     |     |     |     |     |     |     |     |     |    |     |     |     |    |     |     |    |     |     |     |
| Otu0038 | 0                                                                                                                                                                                                                         | 0   | 22  | 0   | 0   | 0   | 14  | 0   | 0   | 0   | 0   | 0   | 0   | 0   | 0   | 0   | 0   | 0   | 0  | 0   | 0   | 0   | 0  | 0   | 0   | 0  | 0   | 0   |     |
|         | 0                                                                                                                                                                                                                         | 0   | 0   | 0   | 0   |     |     |     |     |     |     |     |     |     |     |     |     |     |    |     |     |     |    |     |     |    |     |     |     |



|                                                                                                                                                                                                                        |     |     |     |    |     |     |     |     |     |     |     |     |    |     |     |    |     |    |    |     |     |     |    |     |    |      |    |    |
|------------------------------------------------------------------------------------------------------------------------------------------------------------------------------------------------------------------------|-----|-----|-----|----|-----|-----|-----|-----|-----|-----|-----|-----|----|-----|-----|----|-----|----|----|-----|-----|-----|----|-----|----|------|----|----|
| Otu0040                                                                                                                                                                                                                | 136 | 0   | 0   | 32 | 36  | 264 | 495 | 302 | 117 | 0   | 0   | 0   | 0  | 0   | 0   | 2  | 0   | 0  | 3  | 8   | 21  | 0   | 30 | 7   | 0  | 0    | 0  | 0  |
| 8                                                                                                                                                                                                                      | 0   | 227 | 246 | 76 | 41  | 91  | 69  | 172 | 43  | 172 | 119 | 249 | 25 | 0   | 151 | 9  | 0   | 0  | 85 | 52  | 324 | 0   | 0  | 0   | 14 | 0    | 0  | 0  |
| 124                                                                                                                                                                                                                    | 0   | 6   | 0   | 12 | 13  | 0   | 12  | 10  | 7   | 6   | 8   | 0   | 19 | 72  | 10  | 0  | 0   | 0  | 50 | 72  | 16  | 4   | 0  | 105 | 36 | 1    | 0  | 48 |
| 97                                                                                                                                                                                                                     | 19  | 261 | 47  | 0  | 231 | 6   | 37  | 0   | 275 | 48  | 903 | 42  | 13 | 12  | 99  | 0  | 170 | 56 | 24 | 391 | 0   | 105 | 4  | 15  | 0  | 137  |    |    |
| M02255_76_000000000-ADUNE_1_1104_15576_11618 T---AC---GT-AA-GGA-----CCG-A-G-----C-G--T---T-GT-C-CGG-AA-----TC-A--T-T-GG-GC-----GT--A----AA-GG-GT-AC-----G-TA-G-G-C-G-----G--G-TT-T-T-T-----                            |     |     |     |    |     |     |     |     |     |     |     |     |    |     |     |    |     |    |    |     |     |     |    |     |    |      |    |    |
| -----AA---G-T-T-A-----G-A-A--G--TC--A-AA-GG--C-T-AT-A-G-----CT-C-AA-----C-T-A-T-A-G-T-A-----A-G--C-T--T-C-----T-AA-A-A--C-----T-G-G--GG-A-C-C---T-T-G-A-G-T-A--A-TG----GA-A-G-----G-G-A-A--AG-T-----GG--A--ATT---C-    |     |     |     |    |     |     |     |     |     |     |     |     |    |     |     |    |     |    |    |     |     |     |    |     |    |      |    |    |
| C-T-A-GT--GT-A-G-CG-GT--G---G--A-A---TG-C-GC-AG--AT-A-TT--A-G--G-A-G-G-A-AT-A-CC---GG-T-G--GC-GAA-G--G-C-G-----A-C-T-T-T---CTG-G--CC-A-T-----T-A--A-C-T--GA--CG-C-T-G--A-GG--T-A-CG-A--AA-G-C---G-TG--GG-T-            |     |     |     |    |     |     |     |     |     |     |     |     |    |     |     |    |     |    |    |     |     |     |    |     |    |      |    |    |
| -AG-C-A-AA-----CA--GG Bacteria(100);Firmicutes(100);Clostridia(100);Clostridiales(100);Family_XI_Incertae_Sedis(100);Anaerococcus(100);unclassified(100);unclassified(100);unclassified(100);                          |     |     |     |    |     |     |     |     |     |     |     |     |    |     |     |    |     |    |    |     |     |     |    |     |    |      |    |    |
| Otu0041                                                                                                                                                                                                                | 0   | 0   | 0   | 0  | 0   | 0   | 0   | 0   | 0   | 0   | 0   | 3   | 9  | 0   | 0   | 2  | 2   | 3  | 1  | 8   | 0   | 31  | 0  | 5   | 0  | 0    | 8  | 0  |
| 0                                                                                                                                                                                                                      | 0   | 0   | 0   | 0  | 0   | 0   | 0   | 0   | 0   | 0   | 0   | 0   | 0  | 0   | 0   | 0  | 0   | 0  | 0  | 0   | 0   | 0   | 0  | 0   | 0  | 0    | 0  |    |
| 1                                                                                                                                                                                                                      | 0   | 0   | 0   | 16 | 0   | 0   | 0   | 0   | 0   | 0   | 34  | 34  | 0  | 0   | 0   | 0  | 0   | 0  | 0  | 0   | 1   | 0   | 0  | 0   | 0  | 0    | 0  | 0  |
| 0                                                                                                                                                                                                                      | 0   | 0   | 0   | 0  | 0   | 0   | 1   | 4   | 0   | 3   | 0   | 3   | 0  | 2   | 0   | 0  | 0   | 0  | 0  | 0   | 0   | 0   | 0  | 0   | 0  | 0    | 0  |    |
| M02255_76_000000000-ADUNE_1_1106_12350_5324 C---GG---CT-AA-CTC-----CGT-G-C-----C--A-G---C-AG-C-CGC-GG-----TA-A-T-A--CG-GA-----GG--A----TC-CA-AG-CG-----T-TA-T-C-C-G-----G--T-CA-G-A-T-----AA--                         |     |     |     |    |     |     |     |     |     |     |     |     |    |     |     |    |     |    |    |     |     |     |    |     |    |      |    |    |
| --G-T-C-A-----G-T-G--G--TG--A-AA-GC--C-C-AT-C-G-----CT-C-AA-----C-G-G-T-G-G-A-A-C---G-G--C-C--A--T-----T-GA-T-A--C-----T-G-T-CT--G-A-C---T-T-G-A-A-T--T--A-TT----AG-G-A-----A-G-T-A--AC-T-----AG--A--ATA---T-G-T-A-GT- |     |     |     |    |     |     |     |     |     |     |     |     |    |     |     |    |     |    |    |     |     |     |    |     |    |      |    |    |
| -GT-A-G-CG-GT--G---A-A-A---TG-C-TT-AG--AG-A-TT--A-C--A-T-G-G-A-AT-A-CC---AA--T--T-GC-GAA-G--G-C-A-----G-G-T-T-A---CTA--C--TA-A-T-----A-T--A-T-T-GA--CG-C-T-G--A-TG--G-A-CG-A--AA-G-C---G-TG--GG-T--AG-C-G-             |     |     |     |    |     |     |     |     |     |     |     |     |    |     |     |    |     |    |    |     |     |     |    |     |    |      |    |    |
| AA-----CA--GG Bacteria(100);Bacteroidetes(100);Flavobacteria(100);Flavobacteriales(100);Flavobacteriaceae(100);Flavobacterium(100);unclassified(100);unclassified(100);unclassified(100);                              |     |     |     |    |     |     |     |     |     |     |     |     |    |     |     |    |     |    |    |     |     |     |    |     |    |      |    |    |
| Otu0042                                                                                                                                                                                                                | 0   | 0   | 0   | 0  | 0   | 13  | 0   | 0   | 0   | 0   | 0   | 0   | 0  | 0   | 0   | 0  | 0   | 0  | 0  | 0   | 0   | 15  | 0  | 6   | 0  | 0    | 0  |    |
| 0                                                                                                                                                                                                                      | 0   | 0   | 0   | 0  | 8   | 1   | 114 | 15  | 0   | 0   | 0   | 7   | 0  | 0   | 13  | 7  | 0   | 0  | 0  | 3   | 1   | 0   | 22 | 63  | 2  | 2254 | 81 | 0  |
| 0                                                                                                                                                                                                                      | 0   | 0   | 0   | 0  | 4   | 18  | 0   | 4   | 0   | 0   | 0   | 0   | 0  | 9   | 0   | 16 | 50  | 0  | 0  | 0   | 0   | 249 | 0  | 0   | 0  | 0    | 0  |    |
| 0                                                                                                                                                                                                                      | 0   | 0   | 0   | 0  | 0   | 0   | 0   | 0   | 0   | 0   | 0   | 0   | 0  | 0   | 0   | 0  | 0   | 0  | 0  | 0   | 0   | 0   | 0  | 0   | 0  | 0    | 0  |    |
| M02255_77_000000000-ADUT3_1_1104_20268_19099 T---AC---GA-AG-GGG-----GCT-A-G-----C-G--T---T-GT-T-CGG-AT-----TT-A--C-T-GG-GC-----GT--A----AA-GC-GC-AC-----G-TA-G-G-C-G-----G--A-CT-A-T-T-----                            |     |     |     |    |     |     |     |     |     |     |     |     |    |     |     |    |     |    |    |     |     |     |    |     |    |      |    |    |
| -----AA---G-T-C-A-----G-G-G--G--TG--A-AA-TC--C-C-GG-G-G---CT-C-AA-----C-C-C-C-G-G-A-A-C---T-G--C-C--T--T-----T-GA-T-A--C-----T-G-G--TA-G-T-C---T-T-G-A-G-T-T--C-GA---GA-G-A-----G-G-T-G--AG-T-----GG--A--ATT---C-      |     |     |     |    |     |     |     |     |     |     |     |     |    |     |     |    |     |    |    |     |     |     |    |     |    |      |    |    |
| C-G-A-GT--GT-A-G-AG-GT--G---A-A-A---TT-C-GT-AG--AT-A-TT--C-G--G-A-G-G-A-AC-A-CC---AG--T-G--GC-GAA-G--G-C-G-----G--C-T-C-A---CTG-G--CT-C-G-----A-T--A-C-T--GA--CG-C-T-G--A-GG--T-G-CG-A--AA-G-C---G-TG--GG-             |     |     |     |    |     |     |     |     |     |     |     |     |    |     |     |    |     |    |    |     |     |     |    |     |    |      |    |    |
| G--AG-C-A-AA-----CA--GG Bacteria(100);Proteobacteria(100);Alphaproteobacteria(100);Rhizobiales(94);unclassified(94);unclassified(94);unclassified(94);unclassified(94);unclassified(94);                               |     |     |     |    |     |     |     |     |     |     |     |     |    |     |     |    |     |    |    |     |     |     |    |     |    |      |    |    |
| Otu0043                                                                                                                                                                                                                | 0   | 0   | 0   | 0  | 81  | 0   | 4   | 32  | 54  | 0   | 0   | 0   | 0  | 0   | 0   | 0  | 3   | 0  | 3  | 0   | 0   | 2   | 30 | 0   | 11 | 2    | 4  | 0  |
| 0                                                                                                                                                                                                                      | 0   | 0   | 22  | 0  | 85  | 42  | 0   | 0   | 0   | 17  | 76  | 18  | 20 | 199 | 103 | 35 | 0   | 0  | 32 | 79  | 0   | 0   | 49 | 18  | 1  | 0    | 0  | 61 |
| 0                                                                                                                                                                                                                      | 21  | 0   | 0   | 0  | 0   | 0   | 0   | 0   | 0   | 0   | 3   | 6   | 0  | 19  | 6   | 17 | 54  | 52 | 0  | 0   | 8   | 7   |    |     |    |      |    |    |



|                                                                                                                                                                                                                             |     |     |     |    |    |     |     |    |    |    |    |    |     |     |     |     |     |     |       |     |    |    |    |     |    |    |     |    |
|-----------------------------------------------------------------------------------------------------------------------------------------------------------------------------------------------------------------------------|-----|-----|-----|----|----|-----|-----|----|----|----|----|----|-----|-----|-----|-----|-----|-----|-------|-----|----|----|----|-----|----|----|-----|----|
| Otu0045                                                                                                                                                                                                                     | 0   | 0   | 0   | 0  | 0  | 0   | 0   | 0  | 0  | 0  | 0  | 0  | 0   | 0   | 0   | 0   | 0   | 0   | 0     | 0   | 0  | 0  | 0  | 0   | 0  | 0  | 0   |    |
|                                                                                                                                                                                                                             | 0   | 0   | 0   | 0  | 0  | 0   | 0   | 0  | 0  | 0  | 0  | 0  | 0   | 0   | 0   | 0   | 0   | 0   | 0     | 0   | 0  | 0  | 14 | 0   | 0  | 0  | 0   |    |
|                                                                                                                                                                                                                             | 0   | 0   | 0   | 5  | 0  | 0   | 0   | 0  | 0  | 0  | 0  | 0  | 0   | 0   | 0   | 0   | 0   | 0   | 8502  | 5   | 0  | 0  | 88 | 0   | 0  | 0  | 0   |    |
|                                                                                                                                                                                                                             | 0   | 108 | 145 | 0  | 0  | 0   | 2   | 0  | 71 | 0  | 0  | 0  | 161 | 0   | 0   | 0   | 0   | 0   | 0     | 0   | 0  | 0  | 0  | 0   | 0  | 0  |     |    |
| M02255_77_000000000-ADUT3_1_1101_7055_12150 T---AC---GA-AG-GGG-----GCT-A-G-----C--G--T---T--GC-T-CGG-AA-----TT-A-C-T--GG-GC-----GT--A-----AA-GG-GC-GC-----G-TA-G-G-C-G-----G--A-TC-G-T-T-----                               |     |     |     |    |    |     |     |    |    |    |    |    |     |     |     |     |     |     |       |     |    |    |    |     |    |    |     |    |
| AA---G-T-C-A-----G-A-G--G--TG--A-AA-TC--C-C-AG-G-G-----CT-C-AA-----C-C-C-T-G-G-A--A-C---T-G--C-C---T--T-----T-GA-T-A--C-----T-G-G--CG--A-T-C---T-T-G-A-G-T--A---T-GA-----GA-G-A-----G-G-T-A---TG-T-----GG--A--ACT---C-C-G-  |     |     |     |    |    |     |     |    |    |    |    |    |     |     |     |     |     |     |       |     |    |    |    |     |    |    |     |    |
| A-GT--GT-A-G-AG-GT--G---A--A-A---TT-C-GT-AG--AT-A-TT--C-G--G-A-A-G-A-AC-A-CC---AG--T--G--GC-GAA-G--G-C-G-----A--C-A-T-A---CTG--G--CT-C-A-----T-T---A-C-T--GA--CG-C-T-G--A-GG--C-G-CG-A--AA-G-C---G-TG--GG-G--AG-            |     |     |     |    |    |     |     |    |    |    |    |    |     |     |     |     |     |     |       |     |    |    |    |     |    |    |     |    |
| C-A-AA-----CA--GG Bacteria(100);Proteobacteria(100);Alphaproteobacteria(100);Caulobacterales(99);Caulobacteraceae(99);Brevundimonas(95);unclassified(95);unclassified(95);unclassified(95);                                 |     |     |     |    |    |     |     |    |    |    |    |    |     |     |     |     |     |     |       |     |    |    |    |     |    |    |     |    |
| Otu0046                                                                                                                                                                                                                     | 303 | 0   | 0   | 19 | 62 | 11  | 0   | 0  | 0  | 0  | 0  | 0  | 0   | 0   | 1   | 0   | 0   | 0   | 2     | 0   | 5  | 0  | 0  | 0   | 0  | 0  | 0   |    |
|                                                                                                                                                                                                                             | 0   | 1   | 0   | 0  | 0  | 0   | 29  | 0  | 28 | 0  | 0  | 49 | 0   | 0   | 18  | 26  | 0   | 0   | 0     | 0   | 0  | 19 | 2  | 41  | 0  | 25 | 0   |    |
|                                                                                                                                                                                                                             | 0   | 0   | 1   | 4  | 0  | 5   | 0   | 1  | 3  | 0  | 9  | 5  | 0   | 5   | 56  | 26  | 136 | 0   | 12    | 0   | 1  | 7  | 0  | 0   | 0  | 0  | 0   |    |
|                                                                                                                                                                                                                             | 76  | 137 | 107 | 27 | 58 | 0   | 1   | 0  | 0  | 0  | 0  | 0  | 0   | 0   | 40  | 0   | 3   | 0   | 0     | 0   | 58 | 0  | 0  | 0   | 0  | 0  |     |    |
| M02255_77_000000000-ADUT3_1_1104_25016_13795 T---AC---GT-AG-GGC-----GCA-A-G-----C--G--T---T--GT-C-CGG-AA-----TT-A-T-T--GG-GC-----GT--A-----AA-GA-GC-TC-----G-TA-G-G-C-G-----G--T-TT-G-T-C-----                              |     |     |     |    |    |     |     |    |    |    |    |    |     |     |     |     |     |     |       |     |    |    |    |     |    |    |     |    |
| ----GC---G-T-C-T-----G-C-T--G--TG--A-AA-AC--T-C-AA-G-G-----CT-C-AA-----C-C-T-T-G-G-G--C-T---T-G--C-A--G--T-----G--GG-T-A--C-----G--G-G--CA--G-A-C---T-A-G-A-G-T--G---C-GG---TA-G-G-----G-G-T-G---AC-T-----GG--A--ATT---C-   |     |     |     |    |    |     |     |    |    |    |    |    |     |     |     |     |     |     |       |     |    |    |    |     |    |    |     |    |
| C-T-G-GT--GT-A-G-CG-GT--G---G--A-A---TG-C-GC-AG--AT-A-TC--A-G--G-A-G-G-A-AC-A-CC---GA--T--G--GC-GAA-G--G-C-A-----G--G-T-C-A---CTG--G--GC-C-G-----C-A---A-C-T--GA--CG-C-T-G--A-GG--A-G-CG-A--AA-G-C---A-TG--GG-              |     |     |     |    |    |     |     |    |    |    |    |    |     |     |     |     |     |     |       |     |    |    |    |     |    |    |     |    |
| G--AG-C-G-AA-----CA--GG Bacteria(100);Actinobacteria(100);Actinobacteria(100);Actinobacteridae(100);Actinomycetales(100);Micrococcineae(100);Cellulomonadaceae(59);unclassified;unclassified;                               |     |     |     |    |    |     |     |    |    |    |    |    |     |     |     |     |     |     |       |     |    |    |    |     |    |    |     |    |
| Otu0047                                                                                                                                                                                                                     | 0   | 0   | 0   | 0  | 0  | 0   | 0   | 0  | 0  | 18 | 0  | 0  | 0   | 10  | 0   | 3   | 0   | 0   | 4     | 0   | 0  | 0  | 31 | 0   | 41 | 0  | 0   | 45 |
|                                                                                                                                                                                                                             | 0   | 0   | 0   | 0  | 0  | 0   | 93  | 0  | 0  | 0  | 71 | 0  | 0   | 0   | 0   | 0   | 0   | 0   | 0     | 234 | 0  | 4  | 58 | 107 | 6  | 0  | 0   | 0  |
|                                                                                                                                                                                                                             | 0   | 0   | 0   | 0  | 0  | 0   | 0   | 0  | 0  | 0  | 0  | 0  | 4   | 0   | 0   | 43  | 26  | 160 | 0     | 0   | 0  | 0  | 0  | 0   | 0  | 13 | 0   |    |
|                                                                                                                                                                                                                             | 0   | 77  | 0   | 73 | 0  | 0   | 15  | 0  | 16 | 0  | 0  | 5  | 0   | 0   | 111 | 0   | 0   | 0   | 0     | 0   | 0  | 0  | 0  | 0   | 0  | 0  |     |    |
| M02255_77_000000000-ADUT3_1_1106_10931_10709 T---AC---GG-AG-GGG-----GCT-A-G-----C--G--T---T--GT-T-CGG-AA-----TT-A-C-T--GG-GC-----GT--A-----AA-GC-GC-AC-----G-TA-G-G-C-G-----G--C-TT-T-G-T-----                              |     |     |     |    |    |     |     |    |    |    |    |    |     |     |     |     |     |     |       |     |    |    |    |     |    |    |     |    |
| ----AA---G-T-T-A-----G-A-G--G--TG--A-AA-GC--C-C-GG-G-G-----CT-C-AA-----C-T-C-C-G-G-A--A-T---T-G--C-C---T--T-----T--AA-G-A--C-----T-G-C--AT--C-G-C---T-A-G-A-A-T--T---G-TG---GA-G-A-----G-G-T-A---AG-T-----GG--A--ATT---C-   |     |     |     |    |    |     |     |    |    |    |    |    |     |     |     |     |     |     |       |     |    |    |    |     |    |    |     |    |
| C-G-A-GT--GT-A-G-AG-GT--G---A--A-A---TT-C-GT-AG--AT-A-TT--C-G--G-A-A-G-A-AC-A-CC---AG--T--G--GC-GAA-G--G-C-G-----A--C-T-T-A---CTG--G--AC-A-C-----A-T---A-T-T--GA--CG-C-T-G--A-GG--T-G-CG-A--AA-G-C---G-TG--GG-G-            |     |     |     |    |    |     |     |    |    |    |    |    |     |     |     |     |     |     |       |     |    |    |    |     |    |    |     |    |
| -AG-C-A-AA-----CA--GG Bacteria(100);Proteobacteria(100);Alphaproteobacteria(100);Sphingomonadales(99);unclassified;unclassified;unclassified;unclassified;unclassified;                                                     |     |     |     |    |    |     |     |    |    |    |    |    |     |     |     |     |     |     |       |     |    |    |    |     |    |    |     |    |
| Otu0048                                                                                                                                                                                                                     | 0   | 22  | 0   | 30 | 0  | 0   | 0   | 0  | 15 | 0  | 0  | 0  | 0   | 107 | 46  | 0   | 1   | 0   | 0     | 0   | 3  | 0  | 0  | 4   | 3  | 8  | 17  | 0  |
|                                                                                                                                                                                                                             | 0   | 69  | 11  | 39 | 24 | 129 | 188 | 1  | 33 | 14 | 42 | 0  | 7   | 21  | 40  | 9   | 26  | 22  | 0     | 28  | 59 | 0  | 0  | 50  | 0  | 0  | 7   | 0  |
|                                                                                                                                                                                                                             | 0   | 0   | 0   | 0  | 0  | 0   | 0   | 0  | 0  | 0  | 0  | 0  | 2   | 21  | 0   | 0   | 192 | 0   | 46    | 0   | 0  | 0  | 8  | 0   | 0  | 13 | 20  |    |
|                                                                                                                                                                                                                             | 16  | 26  | 40  | 19 | 0  | 17  | 2   | 0  | 0  | 38 | 0  | 0  | 11  | 0   | 3   | 293 | 10  | 39  | 11    | 0   | 68 | 0  | 0  | 0   | 0  | 28 |     |    |
| M02255_77_000000000-ADUT3_1_1113_11213_20972 T---AC---GT-AG-GGT-----CCG-A-G-----C--G--T---T--GT-C-CGG-AA-----TT-A-C-T--GG-GC-----GT--A-----AA-GA-GC-TC-----G-TA-G-G-T-G-----G--T-TT-G-T-C-----                              |     |     |     |    |    |     |     |    |    |    |    |    |     |     |     |     |     |     |       |     |    |    |    |     |    |    |     |    |
| ----GC---G-T-T-G-----T-T-C--G--TG--A-AA-AC--T-C-AC-A-G-----CT-C-AA-----C-T-G-T-G-G-G--C-G---T-G--C-G---G--G-----C--GA-T-A--C-----G--G-G--CA--G-A-C---T-G-G-A-G-T--A---C-TG---CA-G-G-----G-G-A-G---AC-T-----GG--A--ATT---C-  |     |     |     |    |    |     |     |    |    |    |    |    |     |     |     |     |     |     |       |     |    |    |    |     |    |    |     |    |
| C-T-G-GT--GT-A-G-CG-GT--G---G--A-A---TG-C-GC-AG--AT-A-TC--A-G--G-A-G-G-A-AC-A-CC---GG--T--G--GC-GAA-G--G-C-G-----G--G-T-C-T---CTG--G--GC-A-G-----T-A---A-C-T--GA--CG-C-T-G--A-GG--A-G-CG-A--AA-G-C---G-TG--GG-              |     |     |     |    |    |     |     |    |    |    |    |    |     |     |     |     |     |     |       |     |    |    |    |     |    |    |     |    |
| G--AG-C-G-AA-----CA--GG Bacteria(100);Actinobacteria(100);Actinobacteria(100);Actinobacteridae(100);Actinomycetales(100);Corynebacterineae(100);Mycobacteriaceae(100);Mycobacterium(100);unclassified(100);                 |     |     |     |    |    |     |     |    |    |    |    |    |     |     |     |     |     |     |       |     |    |    |    |     |    |    |     |    |
| Otu0049                                                                                                                                                                                                                     | 0   | 0   | 0   | 0  | 0  | 0   | 0   | 0  | 0  | 0  | 0  | 0  | 110 | 5   | 0   | 4   | 0   | 0   | 5     | 0   | 0  | 0  | 0  | 31  | 0  | 0  | 0   | 0  |
|                                                                                                                                                                                                                             | 0   | 0   | 73  | 0  | 0  | 37  | 35  | 0  | 0  | 0  | 0  | 1  | 0   | 92  | 0   | 49  | 2   | 0   | 30711 | 240 | 0  | 0  | 54 | 19  | 0  | 0  | 142 | 0  |
|                                                                                                                                                                                                                             | 69  | 67  | 9   | 0  | 0  | 0   | 0   | 28 | 0  | 1  | 8  | 0  | 0   | 0   | 10  | 45  | 0   | 0   | 0     | 43  | 6  | 0  | 16 | 0   | 1  | 0  | 0   | 0  |
|                                                                                                                                                                                                                             | 0   | 83  | 0   | 0  | 56 | 0   | 8   | 0  | 0  | 0  | 0  | 0  | 0   | 0   | 0   | 1   | 0   | 0   | 0     | 0   | 0  | 0  | 0  | 0   | 0  | 0  |     |    |
| M02255_77_000000000-ADUT3_1_1106_9970_16182 T---AC---GG-GG-GGT-----GCA-A-G-----C--G--T---T--AC-T-CGG-AA-----TC-A-C-T--GG-GC-----GT--A-----AA-GA-GC-AT-----G-TA-G-G-C-G-----G--A-TT-A-A-T-----                               |     |     |     |    |    |     |     |    |    |    |    |    |     |     |     |     |     |     |       |     |    |    |    |     |    |    |     |    |
| AA---G-T-T-T-----G-A-A--G--TG--A-AA-TC--C-T-AT-A-G-----CT-T-AA-----C-T-A-T-A-G-A--A-C---T-G--C-T---T--T-----G--AA-A-A--C-----T-G-T--TA--A-T-C---T-A-G-A-A-T--G---T-GG---GA-G-A-----G-G-T-A---GA-T-----GG--A--ATT---T-C-T-G- |     |     |     |    |    |     |     |    |    |    |    |    |     |     |     |     |     |     |       |     |    |    |    |     |    |    |     |    |
| GT--GT-A-G-GG-GT--A---A--A-A---TC-C-GT-AG--AG-A-TC--A-G--A-A-G-G-A-AT-A-CC---GA--T--T--GC-GAA-G--G-C-G-----A--T-C-T-A---CTG--G--AA-C-A-----T-T---A-T-T--GA--CG-C-T-G--A-GA--T-G-CG-A--AA-G-C---G-TG--GG-G--AG-C-            |     |     |     |    |    |     |     |    |    |    |    |    |     |     |     |     |     |     |       |     |    |    |    |     |    |    |     |    |
| A-AA-----CA--GG Bacteria(100);Proteobacteria(100);Epsilonproteobacteria(100);Campylobacterales(100);Campylobacteraceae(100);Arcobacter(100);unclassified(100);unclassified(100);unclassified(100);                          |     |     |     |    |    |     |     |    |    |    |    |    |     |     |     |     |     |     |       |     |    |    |    |     |    |    |     |    |



[illegible]



|                                                                                                                                                                                                                               |     |    |      |    |     |     |     |     |    |     |    |    |    |     |    |     |     |    |     |     |    |     |     |     |    |     |    |     |
|-------------------------------------------------------------------------------------------------------------------------------------------------------------------------------------------------------------------------------|-----|----|------|----|-----|-----|-----|-----|----|-----|----|----|----|-----|----|-----|-----|----|-----|-----|----|-----|-----|-----|----|-----|----|-----|
| Otu0055                                                                                                                                                                                                                       | 336 | 80 | 0    | 40 | 101 | 228 | 1   | 150 | 18 | 141 | 4  | 0  | 0  | 155 | 33 | 0   | 2   | 0  | 18  | 7   | 19 | 11  | 0   | 0   | 26 | 225 | 8  | 31  |
| 905                                                                                                                                                                                                                           | 0   | 4  | 0    | 90 | 63  | 63  | 58  | 0   | 51 | 37  | 27 | 23 | 78 | 362 | 0  | 15  | 0   | 0  | 0   | 0   | 26 | 15  | 247 | 20  | 2  | 0   | 22 | 0   |
| 47                                                                                                                                                                                                                            | 70  | 43 | 0    | 11 | 15  | 18  | 8   | 14  | 0  | 0   | 0  | 0  | 15 | 113 | 10 | 86  | 246 | 0  | 0   | 0   | 8  | 0   | 0   | 153 | 0  | 0   | 30 | 25  |
| 0                                                                                                                                                                                                                             | 39  | 0  | 2154 | 0  | 7   | 0   | 1   | 0   | 68 | 0   | 0  | 6  | 41 | 0   | 87 | 336 | 48  | 95 | 259 | 123 | 48 | 229 | 0   | 33  | 0  | 0   |    |     |
| M02255_77_000000000-ADUT3_1_1101_7238_12025 T---AC---GA-AG-GGG-----GCT-A-G-----C--G--T---T--GC-T-CGG-AA-----TC-A-C-T--GG-GC-----GT--A----AA-GG-GC-GC-----G-TA-G-G-C-G-----G--C-TG-A-T-T-----                                  |     |    |      |    |     |     |     |     |    |     |    |    |    |     |    |     |     |    |     |     |    |     |     |     |    |     |    |     |
| TA---G-T-C-G-----A-G-G--G--TG--A-AA-GC--C-T-GT-G-G-----CT-C-AA-----C-C-A-C-A-G-A--A-T---T-G--C-C---T--T-----C-GA-T-A--C-----T-G-G--TT--G-G-C---T-T-G-A-G-A--C---C-GG-----AA-G-A-----G-G-A-C---AG-C-----GG--A--ACT---G-C-G-    |     |    |      |    |     |     |     |     |    |     |    |    |    |     |    |     |     |    |     |     |    |     |     |     |    |     |    |     |
| A-GT--GT-A-G-AG-GT--G---A--A-A---TT-C-GT-AG--AT-A-TT--C-G--C-A-A-G-A-AC-A-CC---AG--T--G--GC-GAA-G--G-C-G-----G--C-T-G-T---CTG--G--TC-C-G-----G-T---T-C-T--GA--CG-C-T-G--A-GG--C-G-CG-A--AA-G-C---G-TG--GG-G--AG-              |     |    |      |    |     |     |     |     |    |     |    |    |    |     |    |     |     |    |     |     |    |     |     |     |    |     |    |     |
| C-A-AA-----CA--GG Bacteria(100);Proteobacteria(100);Alphaproteobacteria(100);Rhizobiales(100);Methylobacteriaceae(100);Methylobacterium(100);unclassified(100);unclassified(100);unclassified(100);                           |     |    |      |    |     |     |     |     |    |     |    |    |    |     |    |     |     |    |     |     |    |     |     |     |    |     |    |     |
| Otu0056                                                                                                                                                                                                                       | 0   | 0  | 0    | 0  | 0   | 0   | 0   | 0   | 0  | 0   | 0  | 7  | 21 | 13  | 29 | 4   | 50  | 8  | 3   | 9   | 24 | 7   | 0   | 0   | 0  | 0   | 3  | 0   |
| 0                                                                                                                                                                                                                             | 0   | 0  | 0    | 0  | 0   | 0   | 1   | 0   | 0  | 0   | 0  | 0  | 0  | 0   | 0  | 0   | 0   | 46 | 0   | 2   | 0  | 39  | 0   | 10  | 8  | 0   | 16 | 1   |
| 0                                                                                                                                                                                                                             | 0   | 2  | 29   | 0  | 0   | 14  | 50  | 5   | 25 | 0   | 6  | 3  | 2  | 0   | 0  | 0   | 0   | 0  | 0   | 1   | 0  | 0   | 0   | 0   | 0  | 0   | 0  | 0   |
| 0                                                                                                                                                                                                                             | 0   | 1  | 0    | 0  | 4   | 13  | 8   | 5   | 0  | 7   | 0  | 11 | 0  | 8   | 0  | 0   | 0   | 0  | 0   | 0   | 0  | 0   | 0   | 0   | 0  | 0   | 0  | 0   |
| M02255_76_000000000-ADUNE_1_1112_20802_18049 G---AC---AG-AA-TAA-----GCA-C-C-----G--G--C---T--AACT-CTG-TG-----CC-A--G-C--AG-CC-----GC--G-----GT-AA-TA-CA-----G-AG-G-G-T-GC-----A--A-GC-G-T-T---                                |     |    |      |    |     |     |     |     |    |     |    |    |    |     |    |     |     |    |     |     |    |     |     |     |    |     |    |     |
| -----AA---T-C-G-G-----A-A-T--G--TG--A-AA-TC--C-C-CG-G-G-----CT-C-AA-----C-C-T-G-G-G-A--A-C---T-G--C-A---T--C-----C-AA-A-A--C-----T-G-G--CA--A-G-C---T-A-G-A-G-T--A---T-GG-----TA-G-A-----G-G-G-T---AG-T-----GG--A--ATT---     |     |    |      |    |     |     |     |     |    |     |    |    |    |     |    |     |     |    |     |     |    |     |     |     |    |     |    |     |
| T-C-C-T-GT--GT-A-G-CG-GT--G---A--A-A---TG-C-GT-AG--AT-A-TA--G-G--A-A-G-G-A-AC-A-CC---AG--T--G--GC-GAA-G--G-C-G-----A--C-T-A-C---CTG--G--AC-T-G-----A-T---A-C-T--GA--CA-C-T-G--A-GG--T-G-CG-A--AA-G-C---G-TG--GG-              |     |    |      |    |     |     |     |     |    |     |    |    |    |     |    |     |     |    |     |     |    |     |     |     |    |     |    |     |
| G--AG-C-A-AA-----CA--GG Bacteria(100);Proteobacteria(100);Gammaproteobacteria(100);unclassified(89);unclassified(89);unclassified(89);unclassified(89);unclassified(89);unclassified(89);                                     |     |    |      |    |     |     |     |     |    |     |    |    |    |     |    |     |     |    |     |     |    |     |     |     |    |     |    |     |
| Otu0057                                                                                                                                                                                                                       | 297 | 0  | 0    | 39 | 0   | 0   | 0   | 0   | 0  | 0   | 0  | 0  | 0  | 0   | 0  | 0   | 0   | 1  | 0   | 0   | 12 | 0   | 0   | 0   | 0  | 0   | 0  | 3   |
| 0                                                                                                                                                                                                                             | 0   | 0  | 87   | 0  | 0   | 0   | 122 | 0   | 28 | 38  | 0  | 0  | 0  | 16  | 0  | 0   | 0   | 0  | 0   | 0   | 95 | 0   | 0   | 0   | 0  | 0   | 0  | 102 |
| 0                                                                                                                                                                                                                             | 0   | 0  | 1    | 0  | 0   | 5   | 9   | 0   | 8  | 0   | 0  | 0  | 0  | 14  | 0  | 0   | 24  | 0  | 33  | 0   | 0  | 0   | 0   | 0   | 0  | 0   | 24 | 0   |
| 0                                                                                                                                                                                                                             | 0   | 0  | 0    | 0  | 0   | 0   | 0   | 0   | 0  | 0   | 0  | 0  | 0  | 0   | 0  | 0   | 73  | 10 | 0   | 0   | 0  | 0   | 0   | 0   | 0  | 0   | 0  | 0   |
| M02255_77_000000000-ADUT3_1_1102_11614_3024 T---AC---GA-AG-GGG-----GCT-A-G-----C--G--T---T--GC-T-CGG-AA-----TT-A-C-T--GG-GC-----GT--A----AA-GG-GC-GC-----G-TA-G-G-C-G-----G--C-AC-T-G-T-----                                  |     |    |      |    |     |     |     |     |    |     |    |    |    |     |    |     |     |    |     |     |    |     |     |     |    |     |    |     |
| TA---G-T-C-A-----G-G-C--G--TG--A-AA-TT--C-C-TG-G-G-----CT-C-AA-----C-C-T-G-G-G-G--A-C---T-G--C-G---C--T-----T--GA-T-A--C-----G--G-C--AG--A-G-C---T-A-G-A-G-G--A---T-GG-----AA-G-A-----G-G-C-T---CG-C-----GG--A--ATT---C-C-    |     |    |      |    |     |     |     |     |    |     |    |    |    |     |    |     |     |    |     |     |    |     |     |     |    |     |    |     |
| C-A-GT--GT-A-G-AG-GT--G---A--A-A---TT-C-GT-AG--AT-A-TT--G-G--G-A-A-G-A-AC-A-CC---GG--T--G--GC-GAA-G--G-C-G-----G--C-G-A-G---CTG--G--TC-C-A-----T-T---A-C-T--GA--CG-C-T-G--A-GG--C-G-CG-A--CA-G-C---G-TG--GG-G--               |     |    |      |    |     |     |     |     |    |     |    |    |    |     |    |     |     |    |     |     |    |     |     |     |    |     |    |     |
| AG-C-A-AA-----CA--GG Bacteria(100);Proteobacteria(100);Alphaproteobacteria(100);Rhodospirillales(100);Acetobacteraceae(100);unclassified(100);unclassified(100);unclassified(100);unclassified(100);                          |     |    |      |    |     |     |     |     |    |     |    |    |    |     |    |     |     |    |     |     |    |     |     |     |    |     |    |     |
| Otu0058                                                                                                                                                                                                                       | 0   | 0  | 0    | 0  | 0   | 0   | 0   | 0   | 0  | 0   | 0  | 1  | 7  | 0   | 1  | 19  | 3   | 2  | 0   | 5   | 1  | 22  | 0   | 5   | 0  | 0   | 3  | 0   |
| 1                                                                                                                                                                                                                             | 0   | 0  | 0    | 0  | 0   | 0   | 0   | 0   | 0  | 0   | 0  | 0  | 0  | 0   | 0  | 0   | 1   | 0  | 0   | 2   | 0  | 0   | 0   | 0   | 0  | 0   | 0  | 0   |
| 5                                                                                                                                                                                                                             | 0   | 0  | 2    | 21 | 5   | 7   | 1   | 2   | 0  | 1   | 39 | 61 | 21 | 0   | 0  | 0   | 0   | 0  | 0   | 1   | 1  | 0   | 0   | 0   | 0  | 0   | 0  | 0   |
| 0                                                                                                                                                                                                                             | 0   | 0  | 0    | 0  | 0   | 4   | 0   | 0   | 0  | 13  | 0  | 8  | 0  | 4   | 0  | 0   | 0   | 0  | 0   | 0   | 0  | 0   | 0   | 0   | 0  | 0   | 0  | 0   |
| M02255_77_000000000-ADUT3_1_2112_25668_13708 T---AC---GG-AG-GAT-----CCA-A-G-----C--G--T---T--AT-C-CGG-AA-----TC-A-----TT-----GG-GT-----G-TA-G-G-C-G-----G--T-CA-G-A-T-----                                                    |     |    |      |    |     |     |     |     |    |     |    |    |    |     |    |     |     |    |     |     |    |     |     |     |    |     |    |     |
| AA---G-T-C-A-----G-T-G--G--TG--A-AA-GC--C-C-AT-C-G-----CT-C-AA-----C-G-G-T-G-G-A--A-C---G-G--C-C---A--T-----T--GA-T-A--C-----T--G-T--CT--G-A-C---T-T-G-A-A-T--T---A-TT-----AG-G-A-----A-G-T-A---AC-T-----AG--A--ATA---T-G-T-  |     |    |      |    |     |     |     |     |    |     |    |    |    |     |    |     |     |    |     |     |    |     |     |     |    |     |    |     |
| A-GT--GT-A-G-CG-GT--G---A--A-A---TG-C-TT-AG--AG-A-TT--A-C--A-T-G-G-A-AT-A-CC---AA--T--T--GC-GAA-G--G-C-A-----G--G-T-T-A---CTA--C--TA-A-T-----A-T---A-T-T--GA--CG-C-T-G--A-TG--G-A-CG-A--AA-G-C---G-TG--GG-T--AG-              |     |    |      |    |     |     |     |     |    |     |    |    |    |     |    |     |     |    |     |     |    |     |     |     |    |     |    |     |
| C-G-AA-----CA--GG Bacteria(100);Bacteroidetes(100);Flavobacteria(100);Flavobacteriales(100);Flavobacteriaceae(100);Flavobacterium(100);unclassified(100);unclassified(100);unclassified(100);                                 |     |    |      |    |     |     |     |     |    |     |    |    |    |     |    |     |     |    |     |     |    |     |     |     |    |     |    |     |
| Otu0059                                                                                                                                                                                                                       | 0   | 0  | 0    | 0  | 0   | 0   | 0   | 0   | 0  | 0   | 0  | 4  | 39 | 11  | 1  | 0   | 2   | 0  | 4   | 0   | 1  | 3   | 0   | 0   | 0  | 0   | 0  | 0   |
| 0                                                                                                                                                                                                                             | 0   | 0  | 0    | 0  | 0   | 0   | 0   | 1   | 0  | 0   | 0  | 1  | 0  | 0   | 0  | 0   | 0   | 4  | 0   | 0   | 0  | 0   | 0   | 0   | 14 | 0   | 16 | 0   |
| 0                                                                                                                                                                                                                             | 0   | 2  | 0    | 1  | 0   | 0   | 2   | 0   | 18 | 0   | 1  | 0  | 42 | 1   | 0  | 0   | 0   | 0  | 0   | 0   | 0  | 0   | 0   | 0   | 0  | 0   | 0  | 0   |
| 0                                                                                                                                                                                                                             | 0   | 0  | 0    | 0  | 0   | 5   | 2   | 0   | 0  | 0   | 0  | 4  | 0  | 0   | 7  | 0   | 0   | 0  | 0   | 0   | 0  | 0   | 0   | 0   | 0  | 0   | 0  | 0   |
| M02255_77_000000000-ADUT3_1_1115_18276_4051 C---TA---AC-TC-TGT-----GCC-A-G-----C-----A---G--CC-G-CGG-TA-----AT-A-C-A--GA-GG-----GTG-C---AA-GC-GT-TA-----A-TC-G-G---A-----A--T-TA-C-T-T-----AA---                              |     |    |      |    |     |     |     |     |    |     |    |    |    |     |    |     |     |    |     |     |    |     |     |     |    |     |    |     |
| -G-T-T-G-----G-A-T--G--TG--A-AA-TC--C-C-CG-G-G-----CT-C-AA-----C-C-T-G-G-G-A--A-C---T-G--C-A---T--T-----C--AA-A-A--C-----T--G-A--CT--G-A-C---T-A-G-A-G-T--A---T-GG-----TA-G-A-----G-G-G-T---GG-T-----GG--A--ATT---T-C-C-T-GT- |     |    |      |    |     |     |     |     |    |     |    |    |    |     |    |     |     |    |     |     |    |     |     |     |    |     |    |     |
| -GT-A-G-CG-GT--G---A--A-A---TG-C-GT-AG--AT-A-TA--G-G--A-A-G-G-A-AC-A-CC---AG--T--G--GC-GAA-G--G-C-G-----A--C-C-A-C---CTG--G--AC-T-G-----A-T---A-C-T--GA--CA-C-T-G--A-GG--T-G-CG-A--AA-G-C---G-TG--GG-G--AG-C-A-               |     |    |      |    |     |     |     |     |    |     |    |    |    |     |    |     |     |    |     |     |    |     |     |     |    |     |    |     |
| AA-----CA--GG Bacteria(100);Proteobacteria(100);Gammaproteobacteria(100);Pseudomonadales(98);Pseudomonadaceae(98);unclassified(98);unclassified(98);unclassified(98);unclassified(98);                                        |     |    |      |    |     |     |     |     |    |     |    |    |    |     |    |     |     |    |     |     |    |     |     |     |    |     |    |     |



Otu0060 0 0 0 0 0 0 0 0 0 0 0 0 0 0 0 0 0 0 0 0 11 18 0 0 0 0 0 0 27  
0 4 32 0 0 0 18 0 0 62 66 68 0 13 0 0 0 0 0 0 0 0 6 49 0 4 0 34 0  
0 0 0 0 0 0 0 0 0 0 0 0 0 0 0 0 0 167 0 0 0 0 6 0 0 0 0 0  
0 0 0 0 0 0 0 0 0 18 0 0 0 0 0 0 0 0 0 0 0 0 70 3 0 0 0  
M02255\_77\_000000000-ADUT3\_1\_1112\_6665\_11056 T---AC---GA-AG-GGG-----GCT-A-G-----C--G--T---T--GT-T-CGG-AA-----TT-A--C-T--GG-GC-----GT--A----AA-GC-GC-AC-----G-TA-G-G-C-G-----G--A-TA-C-T-T-----AA-  
---G-T-C-A-----G-G-G--G-TG--A-AA-TC--C-C-GG-G-G----CT-C-AA-----C-C-C-C-G-G-A--A-C---T-G--C-C---T-T-----T-GA-T-A---C-----T-G-G--GT--A-T-C---T-C-G-A-G-T--C---C-GG----AA-G-A-----G-G-T-G---AG-T-----GG--A--ATT---C-C-G-A-  
GT--GT-A-G-AG-GT--G---A--A-A---TT-C-GT-AG--AT-A-TT--C-G--G-A-G-G-A-AC-A-CC---AG--T--G--GC-GAA-G--G-C--G-----G--C-T-C-A---CTG--G--TC-C-G-----G-T---A-C-T--GA--CG-C-T-G--A-GG--T-G-CG-A--AA-G-C---G-TG--GG-G--AG-  
C-A-AA-----CA--GG Bacteria(100);Proteobacteria(100);Alphaproteobacteria(100);Rhizobiales(100);unclassified(100);unclassified(100);unclassified(100);unclassified(100);unclassified(100);

Otu0061 0 0 0 0 0 0 0 0 0 0 0 0 1 6 4 3 0 12 0 0 3 6 4 0 0 0 0 0  
0 0 0 0 0 0 0 0 0 0 0 0 0 0 0 0 0 18 0 0 0 23 0 3 0 0 9 0  
0 0 0 9 0 1 2 4 0 4 0 0 0 0 0 0 0 0 0 0 0 0 0 0 0 0 0 0  
0 0 0 1 0 2 2 2 0 0 1 0 0 0 3 0 0 0 0 0 0 0 0 0 0 0 0 0  
M02255\_76\_000000000-ADUNE\_1\_2101\_7129\_19100 T---AC---CG-AC-AGA-----ATA-A-G-----C----A--C-CG-G-CTA-AC-----TC-T--G-T--GC-CA-----GC--AG---CC-GC-GG-TA-----A-TA-C-A-G-A-----G--G-GT-G-C-A-----AG-  
---C-G-T-T-----A-A-T--C--GG--A-AA-TC--C-C-CG-G-G----CT-C-AA-----C-C-T-G-G-G-A--A-C---T-G--C-A---T-C-----C--AA-A-A---C-----T-G-G--CA--A-G-C---T-A-G-A-G-T--A---T-GG----TA-G-A-----G-G-G-T---AG-T-----GG--A--ATT---T-C-C-T-  
GT--GT-A-G-CG-GT--G---A--A-A---TG-C-GT-AG--AT-A-TA--G-G--A-A-G-G-A-AC-A-CC---AG--T--G--GC-GAA-G--G-C--G-----A--C-T-A-C---CTG--G--AC-T-G-----A-T---A-C-T--GA--CA-C-T-G--A-GG--T-G-CG-A--AA-G-C---G-TG--GG-G--AG-  
C-A-AA-----CA--GG Bacteria(100);Proteobacteria(100);Gammaproteobacteria(100);unclassified(96);unclassified(96);unclassified(96);unclassified(96);unclassified(96);unclassified(96);

Otu0062 0 0 0 0 0 0 0 0 0 0 0 0 0 0 0 0 0 0 0 0 1 0 0 0 0 3 1 0 66  
0 2 0 0 0 0 12 0 0 55 60 14 23 20 1 18 0 0 12 55 0 0 0 0 0 5 0 20 0  
0 0 0 0 0 0 0 0 0 0 0 0 4 0 10 0 10 117 51 0 0 0 0 0 0 0 0  
22 0 0 10 0 0 0 0 0 34 0 0 5 25 0 15 0 68 0 17 0 0 32 0 0 0 42  
M02255\_77\_000000000-ADUT3\_1\_2101\_18422\_14147 T---AC---GA-AG-GGG-----GCT-A-G-----C--G--T---T--GT-T-CGG-AA-----TC-A--C-T--GG-GC-----GT--A----AA-GG-GC-GC-----G-TA-G-G-C-G-----G--C-TT-T-A-T-----  
-----AA---G-T-C-G-----G-G-G--G-TG--A-AA-GC--C-T-GT-G-G----CT-C-AA-----C-C-A-C-A-G-A--A-T---T-G--C-C---T-T-----C--GA-T-A---C-----T-G-T--AT--G-G-C---T-T-G-A-G-A--C---C-GG----AA-G-A-----G-G-T-A---AG-T-----GG--A--ACT---  
G-C-G-A-GT--GT-A-G-AG-GT--G---A--A-A---TT-C-GT-AG--AT-A-TT--C-G--C-A-A-G-A-AC-A-CC---AG--T--G--GC-GAA-G--G-C--G-----G--C-T-T-A---CTG--G--TC-C-G-----G-T---T-C-T--GA--CG-C-T-G--A-GG--C-G-CG-A--AA-G-C---G-TG--GG-  
G--AG-C-A-AA-----CA--GG Bacteria(100);Proteobacteria(100);Alphaproteobacteria(100);Rhizobiales(100);unclassified(100);unclassified(100);unclassified(100);unclassified(100);unclassified(100);

Otu0063 145 0 12 74 0 0 0 0 0 0 0 0 0 0 25 2 0 0 0 0 0 1 0 84 8 0 0 4 1  
0 0 0 0 0 32 0 27 0 4 0 0 0 0 31 0 20 0 4 0 0 0 1 0 0 3 4 0 0  
0 0 0 0 0 0 0 0 0 0 0 0 0 0 18 0 28 0 0 0 2 0 0 14 0 0 0 0  
0 0 62 22 0 0 0 0 0 0 0 0 0 0 0 0 0 14 13 31 0 0 8 1 0 0 28  
M02255\_77\_000000000-ADUT3\_1\_2119\_19457\_16458 T---AC---GT-AG-GGT-----GCA-A-G-----C--G--T---T--GT-T-CGG-AA-----TT-A--T-T--GG-GC-----GT--A----AA-GA-GC-TC-----G-TA-G-G-C-G-----G--T-TT-G-T-C-----  
-----GC---G-T-C-T-----G-C-T--G--TG--A-AA-TC--C-C-GA-G-G----CT-C-AA-----C-C-T-C-G-G-G--C-C---T-G--C-A---G-T-----G--GG-T-A---C-----G--G-G--CA--G-A-C---T-T-G-A-G-T--G---C-GG----TA-G-G-----G-G-A-G---AT-T-----GG--A--ATT---C-  
C-T-G-GT--GT-A-G-CG-GT--G---G--A-A---TG-C-GC-AG--AT-A-TC--A-G--G-A-G-G-A-AC-A-CC---GA--T--G--GC-GAA-G--G-C--A-----G--A-T-C-T---CTG--G--GC-C-G-----T-T---A-C-T--GA--CG-C-T-G--A-GG--A-G-CG-A--AA-G-C---A-TG--GG-  
G--AG-C-G-AA-----CA--GG Bacteria(100);Actinobacteria(100);Actinobacteria(100);Actinobacteridae(100);Actinomycetales(100);Micrococcineae(100);Microbacteriaceae(89);unclassified(86);unclassified(86);

Otu0064 231 0 272 0 0 115 365 77 731 0 0 0 0 1 0 0 0 3 2 0 0 2 0 93 0 4 0 1  
7 0 282 0 263 0 0 0 0 1 0 193 0 0 71 12 0 0 0 0 0 1 7 152 39 0 0 0 0  
0 0 0 0 0 0 0 0 0 0 0 0 13 0 0 0 12 215 0 0 0 0 0 0 0 0  
0 188 0 185 73 0 0 10 0 0 0 0 0 0 0 271 228 1 59 0 0 53 0 10 46 0 0  
M02255\_77\_000000000-ADUT3\_1\_1103\_5800\_7439 T---AC---GT-AG-GGG-----GCT-A-G-----C--G--T---T--AT-C-CGG-AA-----TT-A--C-T--GG-GC-----GT--A----AA-GG-GT-GC-----G-TA-G-G-T-G-----G--T-TT-C-T-T-----AA--  
--G-T-C-A-----G-A-G--G-TG--A-AA-GG--C-T-AC-G-G----CT-C-AA-----C-C-G-T-A-G-T--A-----A-G--C-C---T-T-----T-GA-A-A---C-----T-G-G--GA--A-A-C---T-T-G-A-G-T--G---C-AG----GA-G-A-----G-G-A-G---AG-T-----GG--A--ATT---C-C-T-A-  
GT--GT-A-G-CG-GT--G---A--A-A---TG-C-GT-AG--AT-A-TT--A-G--G-A-G-G-A-AC-A-CC---AG--T--T--GC-GAA-G--G-C--G-----G--C-T-C-T---CTG--G--AC-T-G-----T-A---A-C-T--GA--CA-C-T-G--A-GG--C-A-CG-A--AA-G-C---G-TG--GG-G--AG-C-  
A-AA-----CA--GG Bacteria(100);Firmicutes(100);Clostridia(100);Clostridiales(100);Peptostreptococcaceae(100);Incertae\_Sedis(63);unclassified(63);unclassified(63);unclassified(63);



[illegible]



|                                                                                                                                                                                                                            |     |     |    |     |    |     |    |     |    |     |    |    |    |    |    |     |     |    |     |     |     |     |    |     |     |     |    |      |    |
|----------------------------------------------------------------------------------------------------------------------------------------------------------------------------------------------------------------------------|-----|-----|----|-----|----|-----|----|-----|----|-----|----|----|----|----|----|-----|-----|----|-----|-----|-----|-----|----|-----|-----|-----|----|------|----|
| Otu0070                                                                                                                                                                                                                    | 0   | 0   | 0  | 1   | 0  | 0   | 0  | 0   | 0  | 0   | 1  | 0  | 1  | 0  | 1  | 4   | 3   | 3  | 8   | 10  | 0   | 4   | 0  | 0   | 0   | 0   | 1  | 0    |    |
|                                                                                                                                                                                                                            | 0   | 0   | 0  | 0   | 0  | 0   | 0  | 0   | 0  | 0   | 0  | 0  | 0  | 0  | 0  | 0   | 0   | 19 | 0   | 0   | 0   | 27  | 0  | 7   | 40  | 2   | 0  | 0    |    |
|                                                                                                                                                                                                                            | 0   | 1   | 19 | 25  | 0  | 34  | 8  | 0   | 33 | 7   | 0  | 0  | 0  | 29 | 0  | 0   | 0   | 3  | 1   | 0   | 0   | 0   | 0  | 0   | 0   | 0   | 1  | 0    |    |
|                                                                                                                                                                                                                            | 0   | 0   | 0  | 0   | 0  | 0   | 0  | 5   | 30 | 0   | 16 | 0  | 10 | 0  | 42 | 0   | 0   | 0  | 0   | 0   | 0   | 0   | 0  | 0   | 0   | 0   | 0  | 0    |    |
| M02255_76_000000000-ADUNE_1_1118_14414_20727 C---GG---CT-A--ACT-----ACG-T-G-----C--C--A--G--CA-G-CCG-CG-----GT-A--A-T--AC-GT-----AG--G----GT-GC-AA-GC-----GTTA-A-T-C-G-----G--T-TT-T-G-T-----                              |     |     |    |     |    |     |    |     |    |     |    |    |    |    |    |     |     |    |     |     |     |     |    |     |     |     |    |      |    |
| ----AA----G-T-C-T-----G-A-T--G--TG--A-AA-TC--C-C-CG-G-G----CT-C-AA-----C-C-T-G-G-G-A--A-T---T-G--C-A--T--T-----G--GA-G-A--C-----T-G-C-AA--G-G-C---T-A-G-A-A-T--C---T-GG----CA-G-A-----G-G-G-G---GG-T-----AG--A--ATT---C-   |     |     |    |     |    |     |    |     |    |     |    |    |    |    |    |     |     |    |     |     |     |     |    |     |     |     |    |      |    |
| C-A-C-GT--GT-A-G-CA-GT--G---A--A-A---TG-C-GT-AG--AT-A-TG--T-G--G-A-G-G-A-AC-A-CC---GA--T--G--GC-GAA-G--G-C-A-----G--C-C-C-C--CTG--G--GT-C-A-----A-G--A-T-T--GA--CG-C-T-C--A-TG--C-A-CG-A--AA-G-C---G-TG--GG-G-             |     |     |    |     |    |     |    |     |    |     |    |    |    |    |    |     |     |    |     |     |     |     |    |     |     |     |    |      |    |
| -AG-C-A-AA-----CA--GG Bacteria(100);Proteobacteria(100);Betaproteobacteria(100);Burkholderiales(100);Oxalobacteraceae(100);Janthinobacterium(93);unclassified(93);unclassified(93);unclassified(93);                       |     |     |    |     |    |     |    |     |    |     |    |    |    |    |    |     |     |    |     |     |     |     |    |     |     |     |    |      |    |
| Otu0071                                                                                                                                                                                                                    | 1   | 8   | 0  | 8   | 38 | 0   | 24 | 72  | 22 | 10  | 1  | 1  | 0  | 3  | 0  | 0   | 0   | 14 | 3   | 3   | 10  | 0   | 46 | 16  | 6   | 55  | 13 | 17   |    |
|                                                                                                                                                                                                                            | 6   | 133 | 41 | 146 | 24 | 277 | 13 | 44  | 64 | 38  | 28 | 76 | 11 | 76 | 99 | 214 | 31  | 35 | 3   | 105 | 96  | 186 | 4  | 68  | 30  | 5   | 0  | 0    | 39 |
|                                                                                                                                                                                                                            | 12  | 24  | 29 | 2   | 0  | 7   | 5  | 2   | 0  | 0   | 0  | 3  | 0  | 4  | 32 | 34  | 17  | 5  | 40  | 90  | 58  | 8   | 24 | 16  | 138 | 0   | 0  | 2128 | 12 |
|                                                                                                                                                                                                                            | 226 | 164 | 72 | 20  | 47 | 14  | 26 | 6   | 0  | 0   | 7  | 7  | 4  | 32 | 2  | 46  | 16  | 46 | 0   | 0   | 0   | 19  | 0  | 0   | 0   | 0   | 77 |      |    |
| M02255_76_000000000-ADUNE_1_1111_8553_7151 T---A---AG-CA-CCG-----GCT-A-A-----C---T--C-TG-T-GCC-AG-----CA-G--C-C--GC-G-----GT--A-----AT-AC-AG-AG-----G-GT-G-C-G-A-----G--C-TT-G-T-T-----AA---                               |     |     |    |     |    |     |    |     |    |     |    |    |    |    |    |     |     |    |     |     |     |     |    |     |     |     |    |      |    |
| G-T-C-G-----G-A-T--G--TG--A-AA-TC--C-C-TG-A-G----CT-T-AA-----C-T-T-A-G-G-A--A-T---T-G--C-A--T--T-----C--GA-T-A--C-----T--G-G--GA--A-G-C---T-A-G-A-G-T--A--T-GG----GA-G-A-----G-G-A-T--GG-T-----AG--A--ATT---C-C-A-G-GT--   |     |     |    |     |    |     |    |     |    |     |    |    |    |    |    |     |     |    |     |     |     |     |    |     |     |     |    |      |    |
| GT-A-G-CG-GT--G---A--A-A---TG-C-GT-AG--AG-A-TC--T-G--G-A-G-G-A-AT-A-CC---GA--T--G--GC-GAA-G--G-C-A-----G--C-C-A-T--CTG--G--CC-T-A-----A-T--A-C-T--GA--CG-C-T-G--A-GG--T-A-CG-A--AA-G-C---A-TG--GG-G--AG-C-A-               |     |     |    |     |    |     |    |     |    |     |    |    |    |    |    |     |     |    |     |     |     |     |    |     |     |     |    |      |    |
| AA-----CA--GG Bacteria(100);Proteobacteria(100);Gammaproteobacteria(100);Pseudomonadales(100);Moraxellaceae(100);Acinetobacter(100);unclassified(100);unclassified(100);unclassified(100);                                 |     |     |    |     |    |     |    |     |    |     |    |    |    |    |    |     |     |    |     |     |     |     |    |     |     |     |    |      |    |
| Otu0072                                                                                                                                                                                                                    | 0   | 0   | 0  | 0   | 0  | 0   | 0  | 0   | 0  | 0   | 0  | 0  | 7  | 1  | 0  | 0   | 6   | 0  | 0   | 1   | 2   | 0   | 0  | 0   | 0   | 0   | 0  | 0    |    |
|                                                                                                                                                                                                                            | 0   | 0   | 0  | 0   | 0  | 0   | 0  | 0   | 0  | 0   | 0  | 0  | 0  | 0  | 0  | 3   | 0   | 14 | 0   | 0   | 1   | 0   | 0  | 0   | 7   | 0   | 5  | 11   |    |
|                                                                                                                                                                                                                            | 2   | 0   | 0  | 0   | 8  | 0   | 1  | 36  | 1  | 37  | 15 | 1  | 7  | 5  | 0  | 12  | 0   | 0  | 0   | 0   | 0   | 0   | 0  | 0   | 0   | 0   | 0  | 0    |    |
|                                                                                                                                                                                                                            | 0   | 0   | 0  | 0   | 1  | 0   | 0  | 1   | 8  | 0   | 15 | 0  | 15 | 1  | 0  | 3   | 0   | 0  | 0   | 0   | 0   | 0   | 0  | 0   | 0   | 0   | 0  | 0    |    |
| M02255_76_000000000-ADUNE_1_2106_6491_11604 T---AA---GC-AC-CGG-----CTA-A-C-----T--C--T---G--TG-C-CAG-CA-----GC-C--G-C--GG-TA-----AT--A-----CA-GA-GG-GT-----GCAA-GCG-T-T-----A--A-TC-G-G-T-----                             |     |     |    |     |    |     |    |     |    |     |    |    |    |    |    |     |     |    |     |     |     |     |    |     |     |     |    |      |    |
| AA---G-T-T-G-----G-A-T--G--TG--A-AA-TC--C-C-CG-G-G----CT-C-AA-----C-C-T-G-G-G-A--A-C---T-G--C-A--T--T-----C--AA-A-A--C-----T--G-T--CG--A-G-C---T-A-G-A-G-T--A--T-GG----TA-G-A-----G-G-G-T--GG-T-----GG--A--ATT---T-C-C-    |     |     |    |     |    |     |    |     |    |     |    |    |    |    |    |     |     |    |     |     |     |     |    |     |     |     |    |      |    |
| T-GT--GT-A-G-CG-GT--G---A--A-A---TG-C-GT-AG--AT-A-TA--G-G--A-A-G-G-A-AC-A-CC---AG--T--G--GC-GAA-G--G-C-G-----A--C-C-A-C---CTG--G--AC-T-G-----A-T--A-C-T--GA--CA-C-T-G--A-GG--T-G-CG-A--AA-G-C---G-TG--GG-G--               |     |     |    |     |    |     |    |     |    |     |    |    |    |    |    |     |     |    |     |     |     |     |    |     |     |     |    |      |    |
| AG-C-A-AA-----CA--GG Bacteria(100);Proteobacteria(100);Gammaproteobacteria(100);Pseudomonadales(100);Pseudomonadaceae(100);unclassified(100);unclassified(100);unclassified(100);unclassified(100);                        |     |     |    |     |    |     |    |     |    |     |    |    |    |    |    |     |     |    |     |     |     |     |    |     |     |     |    |      |    |
| Otu0073                                                                                                                                                                                                                    | 0   | 0   | 0  | 0   | 0  | 0   | 0  | 0   | 0  | 0   | 0  | 0  | 0  | 0  | 0  | 0   | 0   | 0  | 0   | 0   | 14  | 0   | 7  | 0   | 0   | 4   | 0  | 0    |    |
|                                                                                                                                                                                                                            | 0   | 0   | 1  | 69  | 0  | 0   | 0  | 113 | 92 | 55  | 1  | 0  | 0  | 0  | 16 | 8   | 0   | 0  | 0   | 0   | 0   | 0   | 0  | 30  | 0   | 0   | 0  | 0    |    |
|                                                                                                                                                                                                                            | 0   | 0   | 0  | 0   | 0  | 0   | 0  | 0   | 0  | 0   | 0  | 0  | 0  | 27 | 0  | 0   | 29  | 0  | 0   | 0   | 0   | 0   | 0  | 0   | 0   | 0   | 0  | 0    |    |
|                                                                                                                                                                                                                            | 0   | 0   | 0  | 16  | 0  | 0   | 10 | 12  | 0  | 9   | 0  | 41 | 1  | 0  | 0  | 38  | 167 | 0  | 189 | 71  | 116 | 81  | 33 | 3   | 0   | 0   | 0  |      |    |
| M02255_77_000000000-ADUT3_1_1103_15036_9999 T---AC---GA-AG-GGG-----GCT-A-G-----C--G--T---T--GC-T-CGG-AA-----TT-A--C-T--GG-GC-----GT--A-----AA-GG-GC-GC-----G-TA-G-G-C-G-----G--A-CA-G-T-T-----                             |     |     |    |     |    |     |    |     |    |     |    |    |    |    |    |     |     |    |     |     |     |     |    |     |     |     |    |      |    |
| TA---G-T-C-A-----G-A-G--G--TG--A-AA-GC--C-C-AG-G-G----CT-C-AA-----C-C-T-T-G-G-A--A-T---T-G--C-C---T--T-----T--GA-T-A--C-----T--G-G--CT--G-T-C---T-T-G-A-G-T--T--C-GG----GA-G-A-----G-G-T-G--AG-T-----GG--A--ATG---C-C-G-   |     |     |    |     |    |     |    |     |    |     |    |    |    |    |    |     |     |    |     |     |     |     |    |     |     |     |    |      |    |
| A-GT--GT-A-G-AG-GT--G---A--A-A---TT-C-GT-AG--AT-A-TT--C-G--G-C-G-G-A-AC-A-CC---AG--T--G--GC-GAA-G--G-C-G-----A--C-T-C-A--CTG--G--CC-C-G-----A-T--A-C-T--GA--CG-C-T-G--A-GG--C-G-CG-A--AA-G-C---G-TG--GG-G--                |     |     |    |     |    |     |    |     |    |     |    |    |    |    |    |     |     |    |     |     |     |     |    |     |     |     |    |      |    |
| AG-C-A-AA-----CA--GG Bacteria(100);Proteobacteria(100);Alphaproteobacteria(100);Caulobacterales(100);Caulobacteraceae(100);Phenylobacterium(87);unclassified(87);unclassified(87);unclassified(87);                        |     |     |    |     |    |     |    |     |    |     |    |    |    |    |    |     |     |    |     |     |     |     |    |     |     |     |    |      |    |
| Otu0074                                                                                                                                                                                                                    | 0   | 0   | 0  | 0   | 0  | 53  | 0  | 0   | 0  | 21  | 96 | 97 | 6  | 10 | 28 | 0   | 0   | 0  | 0   | 5   | 0   | 0   | 15 | 107 | 0   | 354 | 76 | 61   |    |
|                                                                                                                                                                                                                            | 200 | 0   | 0  | 0   | 0  | 0   | 0  | 0   | 0  | 0   | 0  | 0  | 0  | 0  | 0  | 21  | 0   | 0  | 0   | 0   | 0   | 0   | 0  | 0   | 0   | 0   | 0  | 0    |    |
|                                                                                                                                                                                                                            | 0   | 19  | 0  | 8   | 0  | 0   | 0  | 2   | 0  | 0   | 0  | 0  | 0  | 0  | 0  | 0   | 0   | 0  | 0   | 30  | 429 | 0   | 0  | 0   | 0   | 0   | 0  | 0    |    |
|                                                                                                                                                                                                                            | 295 | 0   | 0  | 0   | 0  | 0   | 18 | 0   | 22 | 124 | 3  | 26 | 1  | 0  | 0  | 0   | 29  | 0  | 23  | 11  | 44  | 0   | 14 | 1   | 19  | 0   | 0  |      |    |
| M02255_76_000000000-ADUNE_1_1113_18355_14483 T---GG---CT-A--ACT-----ACG-T-G-----C--C--A--G--CA-G-CCG-CG-----GT-A--A-T--AC-GT-----AG--A---TG-GC-AA-GC-----G-TT-GTC-C-G-----G--A-TC-T-T-T-----                               |     |     |    |     |    |     |    |     |    |     |    |    |    |    |    |     |     |    |     |     |     |     |    |     |     |     |    |      |    |
| ----AA----G-T-C-T-----G-A-T--G--TG--A-AA-GA--C-C-CC-A-G----CT-C-AA-----C-T-G-G-G-G-A--A-----G-GT-C-A--T--T-----G--GA-A-A--C-----T--G-G--AG--A-A-C---T-T-G-A-G-T--G---C-AG-----AA-G-A-----G-G-A-G--AG-T-----GG--A--ATT---C- |     |     |    |     |    |     |    |     |    |     |    |    |    |    |    |     |     |    |     |     |     |     |    |     |     |     |    |      |    |
| C-A-T-GT--GT-A-G-CG-GT--G---A--A-A---TG-C-GT-AG--AT-A-TA--T-G--G-A-G-G-A-AC-A-CC---AG--T--G--GC-GAA-G--G-C-G-----A--C-T-C-T--CTG--G--TC-T-G-----T-A--A-C-T--GA--CG-C-T-G--A-GG--C-T-CG-A--AA-G-C---G-TG--GG-G-             |     |     |    |     |    |     |    |     |    |     |    |    |    |    |    |     |     |    |     |     |     |     |    |     |     |     |    |      |    |
| -AG-C-A-AA-----CA--GG Bacteria(100);Firmicutes(100);Bacilli(100);Lactobacillales(100);Carnobacteriaceae(100);unclassified(98);unclassified(98);unclassified(98);unclassified(98);                                          |     |     |    |     |    |     |    |     |    |     |    |    |    |    |    |     |     |    |     |     |     |     |    |     |     |     |    |      |    |



|                                                                                                                                                                                                                       |    |    |    |    |    |    |    |    |    |    |    |     |    |    |    |    |     |    |    |     |    |     |    |   |    |    |    |    |    |
|-----------------------------------------------------------------------------------------------------------------------------------------------------------------------------------------------------------------------|----|----|----|----|----|----|----|----|----|----|----|-----|----|----|----|----|-----|----|----|-----|----|-----|----|---|----|----|----|----|----|
| Otu0075                                                                                                                                                                                                               | 0  | 0  | 0  | 0  | 0  | 0  | 0  | 0  | 0  | 0  | 0  | 0   | 0  | 0  | 0  | 0  | 0   | 0  | 6  | 7   | 0  | 0   | 0  | 5 | 0  | 3  | 0  |    |    |
|                                                                                                                                                                                                                       | 0  | 0  | 0  | 0  | 0  | 3  | 26 | 0  | 48 | 4  | 0  | 0   | 0  | 63 | 0  | 0  | 0   | 0  | 0  | 0   | 0  | 53  | 0  | 2 | 0  | 15 | 0  |    |    |
|                                                                                                                                                                                                                       | 0  | 0  | 0  | 0  | 0  | 3  | 0  | 0  | 0  | 0  | 0  | 0   | 0  | 0  | 0  | 25 | 0   | 0  | 0  | 0   | 0  | 0   | 0  | 0 | 0  | 0  | 0  |    |    |
|                                                                                                                                                                                                                       | 0  | 38 | 0  | 0  | 0  | 0  | 5  | 0  | 0  | 0  | 0  | 0   | 0  | 0  | 0  | 0  | 0   | 27 | 29 | 93  | 0  | 0   | 0  | 0 | 0  | 0  | 0  |    |    |
| M02255_77_000000000-ADUT3_1_1109_8776_6952 T---AC---GT-AG-GGT-----CCG-A-G----C-G-T--T-GT-C-CGG-AA-----TT-A-T-T-GG-GC-----GT-A---AA-GG-GC-TC-----G-TA-G-G-C-G-----G-T-TT-G-T-C-----GC-                                 |    |    |    |    |    |    |    |    |    |    |    |     |    |    |    |    |     |    |    |     |    |     |    |   |    |    |    |    |    |
| --G-T-C-G-----G-G-A-G-TG--A-AA-AC--T-C-AG-G-G-----CT-C-AA-----C-C-C-T-G-A-G-C-G---T-G--C-T--T-C-----C-GA-T-A--C-----G-G-G--CA-G-A-C---T-A-G-A-G-G--T--A-TG----CA-G-G-----G-G-A-G---AA-C-----GG--A--ATT---C-C-T-G-     |    |    |    |    |    |    |    |    |    |    |    |     |    |    |    |    |     |    |    |     |    |     |    |   |    |    |    |    |    |
| GT--GT-A-G-CG-GT--G---A-A---TG-C-GC-AG--AT-A-TC-A-G--G-A-G-G-A-AC-A-CC--GG-T--G--GC-GAA-G--G-C-G-----G--T-T-C-T--CTG-G--GC-A-T-----T-A--C-C-T-GA--CG-C-T-G--A-GG--A-G-CG-A-AA-G-C--A-TG--GG-G--AG-                    |    |    |    |    |    |    |    |    |    |    |    |     |    |    |    |    |     |    |    |     |    |     |    |   |    |    |    |    |    |
| C-G-AA-----CA--GG Bacteria(100);Actinobacteria(100);Actinobacteria(100);Actinobacteridae(100);Actinomycetales(100);Propionibacterineae(100);Nocardiodaceae(100);Aeromicrobium(79);unclassified(79);                   |    |    |    |    |    |    |    |    |    |    |    |     |    |    |    |    |     |    |    |     |    |     |    |   |    |    |    |    |    |
| Otu0076                                                                                                                                                                                                               | 0  | 0  | 0  | 0  | 0  | 0  | 0  | 0  | 0  | 0  | 0  | 7   | 9  | 0  | 3  | 6  | 8   | 4  | 6  | 194 | 43 | 150 | 0  | 0 | 0  | 0  | 3  | 0  |    |
|                                                                                                                                                                                                                       | 22 | 0  | 0  | 0  | 0  | 0  | 0  | 0  | 0  | 0  | 0  | 0   | 0  | 0  | 2  | 0  | 0   | 6  | 0  | 0   | 0  | 0   | 0  | 0 | 0  | 0  | 0  | 0  |    |
|                                                                                                                                                                                                                       | 0  | 5  | 0  | 16 | 0  | 0  | 8  | 0  | 1  | 0  | 0  | 175 | 27 | 7  | 2  | 0  | 11  | 6  | 2  | 0   | 0  | 0   | 0  | 0 | 0  | 0  | 0  | 0  |    |
|                                                                                                                                                                                                                       | 0  | 1  | 0  | 0  | 0  | 1  | 0  | 17 | 6  | 0  | 3  | 0   | 0  | 4  | 32 | 0  | 0   | 0  | 0  | 1   | 0  | 0   | 0  | 0 | 0  | 0  | 0  | 0  |    |
| M02255_76_000000000-ADUNE_1_2114_23364_21203 C---TC---GC-AG-AAT-----AAG-CACC----G-G-C--T--AACT-CTG-TG-----CC-A--G-C-AG-CC-----GC--G---GT-AA-TA-CA-----G-AG-G-G-T-GC-----A--A-GC-G-T-T-                                |    |    |    |    |    |    |    |    |    |    |    |     |    |    |    |    |     |    |    |     |    |     |    |   |    |    |    |    |    |
| -----AA---G-T-C-G-----G-A-T-G--TG--A-AA-TC--C-C-TG-A-G-----CT-T-AA-----C-T-T-A-G-G-A-A-T--T-G--C-A--T-A-----C-GA-T-A--C-----T--G-G--GA--G-A-C---T-A-G-A-G-T-A--T-GG----GA-G-A-----G-G-A-T--GG-T----AG--A--ATT---      |    |    |    |    |    |    |    |    |    |    |    |     |    |    |    |    |     |    |    |     |    |     |    |   |    |    |    |    |    |
| C-C-A-G-GT--GT-A-G-CG-GT--G---A-A-A---TG-C-GT-AG--AG-A-TC-T-G--G-A-G-G-A-AT-A-CC--GA--T--G--GC-GAA-G--G-C-A-----G--C-C-A-T--CTG-G--CC-T-A-----A-T--A-C-T-GA--CA-C-T-G--A-GG--T-A-CG-A-AA-G-C--A-TG--GG-               |    |    |    |    |    |    |    |    |    |    |    |     |    |    |    |    |     |    |    |     |    |     |    |   |    |    |    |    |    |
| G--AG-C-A-AA-----CA--GG Bacteria(100);Proteobacteria(100);Gammaproteobacteria(100);Pseudomonadales(98);Moraxellaceae(98);unclassified(93);unclassified(93);unclassified(93);unclassified(93);                         |    |    |    |    |    |    |    |    |    |    |    |     |    |    |    |    |     |    |    |     |    |     |    |   |    |    |    |    |    |
| Otu0077                                                                                                                                                                                                               | 9  | 11 | 2  | 24 | 3  | 7  | 14 | 29 | 13 | 2  | 0  | 0   | 0  | 0  | 0  | 0  | 1   | 0  | 0  | 1   | 2  | 1   | 0  | 3 | 0  | 0  | 0  | 2  |    |
|                                                                                                                                                                                                                       | 0  | 25 | 4  | 0  | 7  | 14 | 9  | 2  | 8  | 1  | 15 | 17  | 4  | 9  | 33 | 20 | 0   | 7  | 0  | 8   | 18 | 8   | 1  | 4 | 2  | 3  | 0  | 1  | 8  |
|                                                                                                                                                                                                                       | 1  | 43 | 23 | 1  | 1  | 0  | 0  | 0  | 1  | 0  | 0  | 0   | 0  | 0  | 8  | 3  | 163 | 8  | 0  | 8   | 2  | 2   | 0  | 5 | 19 | 13 | 0  | 31 | 43 |
|                                                                                                                                                                                                                       | 12 | 34 | 28 | 45 | 25 | 7  | 0  | 11 | 0  | 3  | 0  | 1   | 0  | 12 | 0  | 6  | 2   | 23 | 0  | 35  | 32 | 29  | 15 | 1 | 13 | 25 | 62 |    |    |
| M02255_77_000000000-ADUT3_1_1106_26298_15966 T---AA---CT-AC-GTG-----CC--A-G----C--A-G--C--CG-C-GGT-AA-----TA-C-G-T-AG-GT-----CC--C---GA-GC-GT-TG-----T-CC-G-G-C-G-----G--T-TA-G-A-T-----                              |    |    |    |    |    |    |    |    |    |    |    |     |    |    |    |    |     |    |    |     |    |     |    |   |    |    |    |    |    |
| ---AA---G-T-C-T-----G-A-A-G--TT--A-AA-GG--C-T-GT-G-G-----CT-T-AA-----C-C-A-T-A-G-T-A-----C-G--C-T--T-T-----G--GA-A-A--C-----T--G-T--TT--A-A-C---T-T-G-A-G-T-G--C-AA---GA-G-G-----G-G-A-G---AG-T-----GG--A--ATT---C-C- |    |    |    |    |    |    |    |    |    |    |    |     |    |    |    |    |     |    |    |     |    |     |    |   |    |    |    |    |    |
| A-T-GT--GT-A-G-CG-GT--G---A-A-A---TG-C-GT-AG--AT-A-TA--T-G--G-A-G-G-A-AC-A-CC--GG--T--G--GC-GAA-A-G-C-G-----G--C-T-C-T--CTG-G--CT-T-G-----T-A--A-C-T-GA--CG-C-T-G--A-GG--C-T-CG-A-AA-G-C--G-TG--GG-G--                |    |    |    |    |    |    |    |    |    |    |    |     |    |    |    |    |     |    |    |     |    |     |    |   |    |    |    |    |    |
| AG-C-A-AA-----CA--GG Bacteria(100);Firmicutes(100);Bacilli(100);Lactobacillales(100);Streptococcaceae(100);Streptococcus(100);unclassified(100);unclassified(100);unclassified(100);                                  |    |    |    |    |    |    |    |    |    |    |    |     |    |    |    |    |     |    |    |     |    |     |    |   |    |    |    |    |    |
| Otu0078                                                                                                                                                                                                               | 0  | 0  | 0  | 0  | 0  | 0  | 33 | 1  | 0  | 44 | 0  | 0   | 0  | 0  | 0  | 0  | 3   | 0  | 0  | 0   | 0  | 0   | 0  | 0 | 0  | 0  | 0  | 11 |    |
|                                                                                                                                                                                                                       | 0  | 0  | 2  | 0  | 0  | 0  | 0  | 0  | 12 | 8  | 0  | 0   | 0  | 40 | 0  | 0  | 117 | 0  | 0  | 1   | 0  | 0   | 0  | 0 | 0  | 0  | 1  | 0  |    |
|                                                                                                                                                                                                                       | 0  | 0  | 0  | 0  | 0  | 0  | 0  | 0  | 0  | 0  | 0  | 0   | 0  | 0  | 0  | 18 | 84  | 0  | 0  | 0   | 0  | 9   | 0  | 0 | 0  | 0  | 0  | 0  |    |
|                                                                                                                                                                                                                       | 0  | 0  | 0  | 0  |    |    |    |    |    |    |    |     |    |    |    |    |     |    |    |     |    |     |    |   |    |    |    |    |    |



[illegible]



|                                                                                                                                                                                                                        |     |     |     |     |     |     |      |      |     |     |     |     |     |     |      |     |      |     |     |     |     |     |     |     |     |     |     |     |
|------------------------------------------------------------------------------------------------------------------------------------------------------------------------------------------------------------------------|-----|-----|-----|-----|-----|-----|------|------|-----|-----|-----|-----|-----|-----|------|-----|------|-----|-----|-----|-----|-----|-----|-----|-----|-----|-----|-----|
| Otu0085                                                                                                                                                                                                                | 280 | 122 | 56  | 189 | 178 | 112 | 173  | 130  | 118 | 99  | 0   | 0   | 3   | 28  | 9    | 4   | 8    | 4   | 21  | 37  | 145 | 23  | 142 | 116 | 35  | 13  | 16  | 37  |
| 8                                                                                                                                                                                                                      | 691 | 455 | 664 | 409 | 563 | 478 | 1111 | 1282 | 520 | 793 | 363 | 537 | 610 | 575 | 1935 | 859 | 1298 | 22  | 264 | 389 | 0   | 50  | 592 | 147 | 24  | 6   | 70  | 432 |
| 42                                                                                                                                                                                                                     | 200 | 45  | 15  | 26  | 27  | 29  | 0    | 31   | 16  | 16  | 12  | 22  | 8   | 95  | 14   | 166 | 80   | 193 | 229 | 181 | 138 | 96  | 464 | 624 | 183 | 70  | 322 | 381 |
| 197                                                                                                                                                                                                                    | 604 | 358 | 212 | 408 | 129 | 33  | 37   | 4    | 161 | 5   | 115 | 19  | 70  | 0   | 273  | 274 | 211  | 117 | 320 | 293 | 390 | 603 | 18  | 145 | 180 | 115 |     |     |
| M02255_77_000000000-ADUT3_1_1104_10775_17601 T---AC---GT-AG-GGT-----GCG-A-G-----C-G--T--T-GT-C-CGG-AT-----TT-A--T-T-GG-GC-----GT-A----AA-GG-GC-TC-----G-TA-G-G-T-G-----G--T-TG-A-T-C-----                              |     |     |     |     |     |     |      |      |     |     |     |     |     |     |      |     |      |     |     |     |     |     |     |     |     |     |     |     |
| ----GC---G-T-C-G-----G-A-A--G--TG--T-AA-TC--T-T-GG-G-G----CT-T-AA-----C-C-C-T-G-A-G--C-G---T-G--C-T--T-T-----C--GA-T-A--C-----G--G-G--TT--G-A-C---T-T-G-A-G-G--A--A-GG----TA-G-G-----G-G-A-G--AA-T-----GG--A--ATT---C- |     |     |     |     |     |     |      |      |     |     |     |     |     |     |      |     |      |     |     |     |     |     |     |     |     |     |     |     |
| C-T-G-GT--GG-A-G-CG-GT--G---G--A-A--TG-C-GC-AG--AT-A-TC--A-G--G-A-G-G-A-AC-A-CC--AG--T-G--GC-GAA-G-G-C-G-----G--T-T-C-T--CTG--G--GC-C-T-----T-T---C-C-T-GA-CG-C-T-G--A-GG--A-G-CG-A--AA-G-C--G-TG--GG-                 |     |     |     |     |     |     |      |      |     |     |     |     |     |     |      |     |      |     |     |     |     |     |     |     |     |     |     |     |
| G--AG-C-G-AA-----CA--GG Bacteria(100);Actinobacteria(100);Actinobacteria(100);Actinobacteridae(100);Actinomycetales(100);Propionibacterineae(100);Propionibacteriaceae(100);Propionibacterium(100);unclassified(100);  |     |     |     |     |     |     |      |      |     |     |     |     |     |     |      |     |      |     |     |     |     |     |     |     |     |     |     |     |
| Otu0086                                                                                                                                                                                                                | 0   | 0   | 0   | 0   | 0   | 0   | 0    | 0    | 0   | 0   | 54  | 1   | 0   | 7   | 4    | 129 | 0    | 9   | 11  | 9   | 5   | 2   | 6   | 6   | 0   | 0   | 0   | 0   |
| 5                                                                                                                                                                                                                      | 0   | 0   | 0   | 1   | 0   | 0   | 0    | 0    | 0   | 0   | 1   | 0   | 15  | 0   | 0    | 1   | 0    | 30  | 1   | 5   | 0   | 0   | 0   | 0   | 0   | 0   | 0   | 1   |
| 0                                                                                                                                                                                                                      | 1   | 0   | 0   | 5   | 0   | 11  | 0    | 0    | 0   | 0   | 0   | 0   | 1   | 0   | 0    | 0   | 0    | 0   | 0   | 1   | 0   | 0   | 0   | 0   | 0   | 0   | 0   | 0   |
| 0                                                                                                                                                                                                                      | 0   | 0   | 0   | 0   | 0   | 0   | 0    | 5    | 0   | 0   | 0   | 0   | 0   | 0   | 12   | 0   | 7    | 0   | 0   | 1   | 0   | 0   | 0   | 0   | 0   | 0   | 0   | 0   |
| M02255_76_000000000-ADUNE_1_2104_26899_16941 .....AC---T-AC-GT-----GCC-A-G-----C--A-G--C--CG-C-GGT-AA-----TA-C--G-T--AG-GT-----GG--C----AA-GC-G--TT-----G---T-C-C-G-----G--T-CT-C-T-T-----                             |     |     |     |     |     |     |      |      |     |     |     |     |     |     |      |     |      |     |     |     |     |     |     |     |     |     |     |     |
| AA---G-T-C-T-----G-A-T--G--TG--A-AA-GC--C-C-CC-G-G----CT-C-AA-----C-C-G-G-G-G-A-G-----G-GT-C-A--T-T-----G--GA-A-A--C-----T-G-G--GA--G-A-C---T-T-G-A-G-G--A--C-AG---AA-G-A-----G-G-A-G--AG-T-----GG--A--ATT---C-C-      |     |     |     |     |     |     |      |      |     |     |     |     |     |     |      |     |      |     |     |     |     |     |     |     |     |     |     |     |
| A-A-GT--GT-A-G-CG-GT--G---A--A-A--TG-C-GT-AG--AT-A-TT--T-G--G-A-G-G-A-AC-A-CC--AG--T-G--GC-GAA-G-G-C-G-----G--C-T-C-T--CTG--G--TC-T-G-----T-T---A-C-T-GA-CG-C-T-G--A-GG--C-G-CG-A--AA-G-C--G-TG--GG-G--                |     |     |     |     |     |     |      |      |     |     |     |     |     |     |      |     |      |     |     |     |     |     |     |     |     |     |     |     |
| AG-C-A-AA-----CA--GG Bacteria(100);Firmicutes(100);Bacilli(100);Bacillales(93);unclassified(93);unclassified(93);unclassified(93);unclassified(93);unclassified(93);                                                   |     |     |     |     |     |     |      |      |     |     |     |     |     |     |      |     |      |     |     |     |     |     |     |     |     |     |     |     |
| Otu0087                                                                                                                                                                                                                | 8   | 8   | 0   | 8   | 0   | 2   | 0    | 4    | 0   | 1   | 0   | 0   | 0   | 0   | 0    | 0   | 1    | 0   | 0   | 0   | 0   | 0   | 1   | 0   | 0   | 0   | 0   | 0   |
| 0                                                                                                                                                                                                                      | 0   | 3   | 0   | 0   | 0   | 16  | 0    | 0    | 4   | 0   | 2   | 2   | 0   | 3   | 8    | 7   | 9    | 0   | 0   | 2   | 0   | 0   | 2   | 1   | 0   | 0   | 0   | 0   |
| 0                                                                                                                                                                                                                      | 0   | 0   | 0   | 0   | 0   | 0   | 0    | 0    | 0   | 0   | 0   | 0   | 0   | 1   | 0    | 2   | 0    | 0   | 0   | 0   | 0   | 0   | 0   | 0   | 14  | 1   | 26  | 2   |
| 3                                                                                                                                                                                                                      | 3   | 0   | 5   | 6   | 2   | 0   | 0    | 0    | 3   | 1   | 0   | 0   | 3   | 0   | 0    | 3   | 1    | 0   | 10  | 38  | 0   | 0   | 1   | 0   | 0   | 3   |     |     |
| M02255_77_000000000-ADUT3_1_1115_27318_14317 C---GG---CT-AA-CT-----ACG-T-G-----C--C--A--G--CA-G-CCG-CG-----GT-A--A-T--AC-GT-----AG--G----TC-CC-GA-GC-----G-CT-GTG-C-G-----G--T-TT-G-A-T-----                           |     |     |     |     |     |     |      |      |     |     |     |     |     |     |      |     |      |     |     |     |     |     |     |     |     |     |     |     |
| ----AA---G-T-C-T-----G-A-A--G--TT--A-AA-GG--C-T-GT-G-G----CT-C-AA-----C-C-A-T-A-G-T-T-----C-G--C-T--T-T-----G--GA-A-A--C-----T-G-T--CA--A-A-C---T-T-G-A-G-T-G--C-AG---AA-G-G-----G-G-A-G--AG-T-----GG--A--ATT---C-     |     |     |     |     |     |     |      |      |     |     |     |     |     |     |      |     |      |     |     |     |     |     |     |     |     |     |     |     |
| C-A-T-GT--GT-A-G-CG-GT--G---A--A-A--TG-C-GT-AG--AT-A-TA--T-G--G-A-G-G-A-AC-A-CC--GG--T-G--GC-GAA-A-G-C-G-----G--C-T-C-T--CTG--G--TC-T-G-----T-A--A-C-T-GA-CG-C-T-G--A-GG--C-T-CG-A--AA-G-C--G-TG--GG-G--               |     |     |     |     |     |     |      |      |     |     |     |     |     |     |      |     |      |     |     |     |     |     |     |     |     |     |     |     |
| -AG-C-G-AA-----CA--GG Bacteria(100);Firmicutes(100);Bacilli(100);Lactobacillales(100);Streptococcaceae(100);Streptococcus(100);unclassified(100);unclassified(100);unclassified(100);                                  |     |     |     |     |     |     |      |      |     |     |     |     |     |     |      |     |      |     |     |     |     |     |     |     |     |     |     |     |
| Otu0088                                                                                                                                                                                                                | 0   | 0   | 0   | 121 | 0   | 3   | 13   | 0    | 0   | 0   | 0   | 0   | 0   | 1   | 0    | 0   | 0    | 0   | 0   | 3   | 5   | 0   | 8   | 0   | 6   | 10  | 0   | 0   |
| 3                                                                                                                                                                                                                      | 0   | 0   | 7   | 0   | 0   | 0   | 0    | 0    | 18  | 11  | 6   | 0   | 6   | 78  | 0    | 1   | 0    | 0   | 0   | 0   | 47  | 0   | 17  | 3   | 21  | 44  | 0   | 0   |
| 0                                                                                                                                                                                                                      | 0   | 0   | 0   | 0   | 3   | 1   | 0    | 8    | 0   | 0   | 0   | 1   | 1   | 40  | 5    | 0   | 0    | 0   | 0   | 0   | 0   | 0   | 0   | 0   | 0   | 0   | 0   | 1   |
| 792                                                                                                                                                                                                                    | 29  | 0   | 7   | 0   | 28  | 0   | 1    | 0    | 9   | 1   | 0   | 0   | 0   | 0   | 0    | 16  | 0    | 0   | 12  | 0   | 0   | 4   | 0   | 0   | 0   | 0   |     |     |
| M02255_76_000000000-ADUNE_1_1107_8076_11701 C---GG---CT-AA-AT-----ACG-T-G-----C--C--A--G--CA-G-CCG-CG-----GT-A--A-T--AC-GT-----AT--G----TC-CC-GA-GC-----GTTA-T-C-C-G-----G--T-TG-G-T-T-----AA---                       |     |     |     |     |     |     |      |      |     |     |     |     |     |     |      |     |      |     |     |     |     |     |     |     |     |     |     |     |
| -G-T-C-T-----G-A-T--G--TG--A-AA-GC--C-C-GG-A-G-----CT-C-AA-----C-T-C-C-G-G-A--A-A--G-G--C-A--T-T-----G--GA-A-A--C-----T-G-G--TT--A-A-C---T-T-G-A-G-T-G--C-AG---TA-G-A-----G-G-T-A--AG-T-----GG--A--ACT---C-C-A-T-      |     |     |     |     |     |     |      |      |     |     |     |     |     |     |      |     |      |     |     |     |     |     |     |     |     |     |     |     |
| GT--GT-A-G-CG-GT--G---G--A-A--TG-C-GT-AG--AT-A-TA--T-G--G-A-A-G-A-AC-A-CC--AG--C--G--GC-GAA-G-G-C-G-----G--C-T-T-A--CTG--G--AC-T-G-----T-A--A-C-T-GA-CG-T-T-G--A-GG--C-T-CG-A--AA-G-T--G-TG--GG-T--AG-C-               |     |     |     |     |     |     |      |      |     |     |     |     |     |     |      |     |      |     |     |     |     |     |     |     |     |     |     |     |
| A-AA-----CA--GG Bacteria(100);Firmicutes(100);Bacilli(100);Lactobacillales(100);Leuconostocaceae(100);Leuconostoc(100);unclassified(100);unclassified(100);unclassified(100);                                          |     |     |     |     |     |     |      |      |     |     |     |     |     |     |      |     |      |     |     |     |     |     |     |     |     |     |     |     |
| Otu0089                                                                                                                                                                                                                | 34  | 0   | 0   | 0   | 0   | 0   | 0    | 0    | 0   | 0   | 1   | 89  | 9   | 11  | 10   | 14  | 2    | 43  | 15  | 95  | 7   | 36  | 31  | 23  | 0   | 0   | 10  | 0   |
| 18                                                                                                                                                                                                                     | 0   | 0   | 0   | 0   | 0   | 0   | 0    | 0    | 0   | 0   | 5   | 0   | 15  | 33  | 0    | 25  | 0    | 0   | 0   | 1   | 3   | 0   | 0   | 18  | 0   | 0   | 4   | 0   |
| 7                                                                                                                                                                                                                      | 0   | 0   | 3   | 0   | 0   | 29  | 0    | 1    | 0   | 49  | 2   | 1   | 2   | 61  | 68   | 0   | 5    | 55  | 0   | 1   | 0   | 0   | 0   | 0   | 0   | 0   | 1   | 0   |
| 7                                                                                                                                                                                                                      | 0   | 39  | 0   | 0   | 24  | 7   | 10   | 12   | 0   | 7   | 0   | 6   | 5   | 3   | 10   | 0   | 0    | 4   | 1   | 0   | 0   | 0   | 0   | 0   | 10  | 0   |     |     |
| M02255_76_000000000-ADUNE_1_1102_10222_22814 C---TA---AC-TC-TGT-----GCC-A-G-----C----A--G--CC-G-CGG-TA-----AT-A--C-A--GA-GG-----GT--G----CA--A-GC-G-----T-TA-A-T-C-G-----G--A-CA-A-T-T-----                            |     |     |     |     |     |     |      |      |     |     |     |     |     |     |      |     |      |     |     |     |     |     |     |     |     |     |     |     |
| --AA---G-T-C-A-----A-A-T--G--TG--A-AA-TC--C-C-CG-A-G-----CT-T-AA-----C-T-T-G-G-G-A--A-T--T-G--C-A--T-T-----C--GA-T-A--C-----T-G-G--TT--G-G-C---T-A-G-A-G-T-A--T-GG----GA-G-A-----G-G-A-T--GG-T-----AG--A--ATT---C-C-   |     |     |     |     |     |     |      |      |     |     |     |     |     |     |      |     |      |     |     |     |     |     |     |     |     |     |     |     |
| A-G-GT--GT-A-G-CG-GT--G---A--A-A--TG-C-GT-AG--AG-A-TC--T-G--G-A-G-G-A-AT-A-CC--GA--T-G--GC-GAA-G-G-C-A-----G--C-C-A-T--CTG--G--CC-T-A-----A-T---A-C-T-GA--CA-C-T-G--A-GG--T-A-CG-A--AA-G-C--A-TG--GG-G--               |     |     |     |     |     |     |      |      |     |     |     |     |     |     |      |     |      |     |     |     |     |     |     |     |     |     |     |     |
| AG-C-A-AA-----CA--GG Bacteria(100);Proteobacteria(100);Gammaproteobacteria(100);Pseudomonadales(100);Moraxellaceae(100);Acinetobacter(100);unclassified(100);unclassified(100);unclassified(100);                      |     |     |     |     |     |     |      |      |     |     |     |     |     |     |      |     |      |     |     |     |     |     |     |     |     |     |     |     |



|                                                                                                                                                                                                                                                                                                                                                                                                                                                                                                                                                                                                                                                                                                                                                                                                                                                       |     |     |     |     |     |     |    |    |    |     |    |      |      |    |   |    |     |    |     |     |      |    |    |     |      |     |    |     |
|-------------------------------------------------------------------------------------------------------------------------------------------------------------------------------------------------------------------------------------------------------------------------------------------------------------------------------------------------------------------------------------------------------------------------------------------------------------------------------------------------------------------------------------------------------------------------------------------------------------------------------------------------------------------------------------------------------------------------------------------------------------------------------------------------------------------------------------------------------|-----|-----|-----|-----|-----|-----|----|----|----|-----|----|------|------|----|---|----|-----|----|-----|-----|------|----|----|-----|------|-----|----|-----|
| Otu0090                                                                                                                                                                                                                                                                                                                                                                                                                                                                                                                                                                                                                                                                                                                                                                                                                                               | 12  | 0   | 0   | 3   | 0   | 0   | 0  | 5  | 0  | 0   | 0  | 0    | 0    | 0  | 0 | 0  | 0   | 0  | 0   | 13  | 0    | 0  | 0  | 0   | 0    | 0   | 0  |     |
|                                                                                                                                                                                                                                                                                                                                                                                                                                                                                                                                                                                                                                                                                                                                                                                                                                                       | 0   | 0   | 0   | 0   | 0   | 0   | 0  | 0  | 54 | 1   | 0  | 0    | 1    | 0  | 0 | 0  | 1   | 0  | 0   | 0   | 0    | 0  | 0  | 0   | 0    | 5   | 29 |     |
|                                                                                                                                                                                                                                                                                                                                                                                                                                                                                                                                                                                                                                                                                                                                                                                                                                                       | 0   | 10  | 0   | 0   | 0   | 3   | 0  | 0  | 0  | 0   | 0  | 0    | 0    | 1  | 0 | 0  | 2   | 0  | 3   | 13  | 0    | 0  | 0  | 0   | 0    | 103 | 0  | 0   |
|                                                                                                                                                                                                                                                                                                                                                                                                                                                                                                                                                                                                                                                                                                                                                                                                                                                       | 0   | 0   | 2   | 0   | 5   | 0   | 1  | 0  | 0  | 0   | 0  | 0    | 0    | 0  | 0 | 0  | 16  | 0  | 13  | 22  | 0    | 0  | 1  | 5   | 0    | 0   |    |     |
| M02255_77_000000000-ADUT3_1_2114_20734_8193 T---AC---GT-AG-GGC-----GCG-A-G-----C--G--T---T--GT-C-CGG-AA-----TT-A--T-T--GG-GC-----GT--A----AA-GA-GC-TT-----G-TA-G-G-C-G-----G--T-TT-G-T-C-----GC-<br>---G-T-C-T-----G-C-T--G--TG--A-AA-GG--C-C-GG-G-G----CT-T-AA-----C-C-C-C-GTG-T--A-T---T-G--C-A--G--T-----G--GG-T-A--C-----G--G-G--CA-G-A-C---T-A-G-A-G-T--G--C-AG----TA-G-G-----G-G-A-G---AC-T-----GG--A--ACT---C-C-T-G-<br>GT--GT-A-G-CG-GT--G---G--A-A---TG-C-GC-AG--AT-A-TC--A-G--G-A-A-G-A-AC-A-CC---GA--T--G--GC-GAA-G--G-C--A-----G--G-T-C-T---CTG--G--GC-T-G-----T-A---A-C-T--GA--CG-C-T-G--A-GA--A-G-CG-A--AA-G-C---A-TG--GG-G--AG-<br>C-G-AA-----CA--GG Bacteria(100);Actinobacteria(100);Actinobacteria(100);Actinobacteridae(100);Actinomycetales(100);Micrococcineae(100);Micrococcaceae(53);unclassified;unclassified;                |     |     |     |     |     |     |    |    |    |     |    |      |      |    |   |    |     |    |     |     |      |    |    |     |      |     |    |     |
| Otu0091                                                                                                                                                                                                                                                                                                                                                                                                                                                                                                                                                                                                                                                                                                                                                                                                                                               | 0   | 1   | 0   | 100 | 0   | 0   | 41 | 0  | 0  | 0   | 0  | 0    | 0    | 0  | 0 | 3  | 0   | 0  | 0   | 8   | 17   | 0  | 36 | 0   | 0    | 0   | 0  | 0   |
|                                                                                                                                                                                                                                                                                                                                                                                                                                                                                                                                                                                                                                                                                                                                                                                                                                                       | 0   | 2   | 220 | 0   | 0   | 0   | 37 | 0  | 0  | 67  | 5  | 91   | 1027 | 49 | 0 | 0  | 0   | 0  | 2   | 0   | 1524 | 22 | 38 | 0   | 0    | 7   | 0  | 463 |
|                                                                                                                                                                                                                                                                                                                                                                                                                                                                                                                                                                                                                                                                                                                                                                                                                                                       | 46  | 134 | 16  | 5   | 0   | 0   | 6  | 4  | 0  | 0   | 18 | 23   | 0    | 10 | 0 | 0  | 0   | 0  | 118 | 0   | 5    | 0  | 0  | 95  | 1142 | 0   | 0  | 79  |
|                                                                                                                                                                                                                                                                                                                                                                                                                                                                                                                                                                                                                                                                                                                                                                                                                                                       | 209 | 63  | 0   | 0   | 113 | 356 | 0  | 20 | 0  | 498 | 19 | 1296 | 18   | 53 | 3 | 54 | 0   | 0  | 0   | 0   | 0    | 12 | 0  | 36  | 0    | 0   |    |     |
| M02255_76_000000000-ADUNE_1_2101_8786_21344 T---AC---GT-AA-GGA-----CCG-A-G-----C--G--T---T--GT-C-CGG-AA-----TC-A--T-T--GG-GC-----GT--A----AA-GG-GT-AC-----G-TA-G-G-C-G-----G--T-TA-A-A-A-----AA-<br>---G-T-T-A-----G-A-A-G--TG--A-AA-GG--C-T-AT-A-G----CT-C-AA-----C-T-A-T-A-G-T-A-----A-G--C-T---T--T-----T--AA-A-A--C-----T--G-T--TT-A-A-C---T-T-G-A-G-A-G--A-TG----GA-A-G-----G-G-A-A--AG-T-----GG--A--ATT---C-C-T-A-GT-<br>-GT-A-G-CG-GT--G---A--A-A---TG-C-GC-AG--AT-A-TT--A-G--G-A-G-G-A-AT-A-CC---GG--T--G--GC-GAA-G--G-C--G-----A--C-T-T-T---CTG--G--CC-A-T-----T-A---T-C-T--GA--CG-C-T-G--A-GG--T-A-CG-A--AA-G-C---G-TG--GG-T--AG-C-A-<br>AA-----CA--GG Bacteria(100);Firmicutes(100);Clostridia(100);Clostridiales(100);Family_XI_Incertae_Sedis(100);Anaerococcus(100);unclassified(100);unclassified(100);unclassified(100);              |     |     |     |     |     |     |    |    |    |     |    |      |      |    |   |    |     |    |     |     |      |    |    |     |      |     |    |     |
| Otu0092                                                                                                                                                                                                                                                                                                                                                                                                                                                                                                                                                                                                                                                                                                                                                                                                                                               | 0   | 0   | 0   | 0   | 0   | 0   | 0  | 0  | 0  | 0   | 0  | 0    | 0    | 0  | 0 | 0  | 0   | 0  | 0   | 7   | 18   | 0  | 57 | 0   | 0    | 5   | 0  | 9   |
|                                                                                                                                                                                                                                                                                                                                                                                                                                                                                                                                                                                                                                                                                                                                                                                                                                                       | 4   | 0   | 0   | 88  | 0   | 0   | 89 | 56 | 3  | 77  | 0  | 0    | 0    | 0  | 0 | 66 | 29  | 0  | 0   | 1   | 0    | 1  | 0  | 134 | 0    | 0   | 0  | 0   |
|                                                                                                                                                                                                                                                                                                                                                                                                                                                                                                                                                                                                                                                                                                                                                                                                                                                       | 0   | 0   | 0   | 0   | 0   | 0   | 0  | 0  | 0  | 0   | 0  | 0    | 0    | 0  | 0 | 0  | 0   | 0  | 0   | 0   | 0    | 0  | 0  | 0   | 0    | 0   | 0  | 63  |
|                                                                                                                                                                                                                                                                                                                                                                                                                                                                                                                                                                                                                                                                                                                                                                                                                                                       | 0   | 0   | 79  | 0   | 0   | 0   | 25 | 0  | 0  | 0   | 0  | 0    | 0    | 0  | 0 | 60 | 137 | 19 | 0   | 0   | 0    | 0  | 0  | 0   | 0    | 0   | 0  |     |
| M02255_77_000000000-ADUT3_1_1101_2238_13804 T---AC---GA-AG-GGG-----GCT-A-G-----C--G--T---T--GT-T-CGG-AA-----TT-A--C-T--GG-GC-----GT--A----AA-GC-GC-AC-----G-TA-G-G-C-G-----G--A-TC-G-A-T-----CA-<br>---G-T-C-A-----G-G-G--G--TG--A-AA-TC--C-C-AG-A-G----CT-C-AA-----C-T-C-T-G-G-A-A-C---T-G--C-C---T--T-----T--GA-T-A--C-----T--G-T--CG--A-T-C---T-A-G-A-G-T--A--T-GG----AA-G-A-----G-G-T-G---AG-T-----GG--A--ATT---C-C-G-A-<br>GT--GT-A-G-AG-GT--G---A--A-A---TT-C-GT-AG--AT-A-TT--C-G--G-A-G-G-A-AC-A-CC---AG--T--G--GC-GAA-G--G-C--G-----G--C-T-C-A---CTG--G--TC-C-A-----T-T---A-C-T--GA--CG-C-T-G--A-GG--T-G-CG-A--AA-G-C---G-TG--GG-G--AG-C-<br>A-AA-----CA--GG Bacteria(100);Proteobacteria(100);Alphaproteobacteria(100);Rhizobiales(100);unclassified(56);unclassified(56);unclassified(56);unclassified(56);unclassified(56);                |     |     |     |     |     |     |    |    |    |     |    |      |      |    |   |    |     |    |     |     |      |    |    |     |      |     |    |     |
| Otu0093                                                                                                                                                                                                                                                                                                                                                                                                                                                                                                                                                                                                                                                                                                                                                                                                                                               | 0   | 0   | 0   | 0   | 0   | 0   | 0  | 0  | 0  | 0   | 0  | 0    | 0    | 3  | 2 | 0  | 0   | 0  | 0   | 0   | 0    | 0  | 0  | 0   | 0    | 0   | 0  | 0   |
|                                                                                                                                                                                                                                                                                                                                                                                                                                                                                                                                                                                                                                                                                                                                                                                                                                                       | 0   | 0   | 0   | 0   | 0   | 0   | 0  | 0  | 0  | 0   | 0  | 0    | 0    | 0  | 0 | 0  | 0   | 0  | 0   | 0   | 0    | 1  | 0  | 0   | 0    | 26  | 0  | 0   |
|                                                                                                                                                                                                                                                                                                                                                                                                                                                                                                                                                                                                                                                                                                                                                                                                                                                       | 2   | 0   | 0   | 0   | 0   | 0   | 0  | 0  | 0  | 0   | 0  | 0    | 0    | 0  | 0 | 0  | 0   | 0  | 0   | 184 | 0    | 0  | 0  | 0   | 288  | 207 | 0  | 9   |
|                                                                                                                                                                                                                                                                                                                                                                                                                                                                                                                                                                                                                                                                                                                                                                                                                                                       | 0   | 0   | 0   | 0   | 0   | 0   | 0  | 0  | 0  | 0   | 1  | 0    | 0    | 0  | 0 | 0  | 0   | 0  | 0   | 0   | 0    | 0  | 0  | 0   | 0    | 0   | 0  |     |
| M02255_76_000000000-ADUNE_1_1113_14717_16707 T---AA---GC-AC-CGG-----CTA-A-C-----T--A--C---G--TG-C-CAG-CA-----GC-C--G-C--GG-TA-----AT--A----CG-TA-GG-GT-----G-CA-A-G-C-G-----T-TAATC-G-G-A---<br>-----AA---G-A-A-A-----G-A-T--G--TG--A-AA-TC--C-C-AG-A-G----CT-T-AA-----C-T-T-T-G-G-A-A-C---T-G--C-A---T--T-----T--TT-A-A--C-----T--A-C--CG--A-G-C---T-A-G-A-G-T--G---T-GT-----CA-G-A-----G-G-G-A---GG-T-----GG--A--ATT---C-<br>C-G-C-GT--GT-A-G-CA-GT--G---A--A-A---TG-C-GT-AG--AT-A-TG--C-G--G-A-G-G-A-AC-A-CC---GA--T--G--GC-GAA-G--G-C--A-----G--C-C-T-C---CTG--G--GA-T-A-----A-C---A-C-T--GA--CG-C-T-C--A-TG--C-A-CG-A--AA-G-C---G-TG--GG-G-<br>-AG-C-A-AA-----CA--GG Bacteria(100);Proteobacteria(100);Betaproteobacteria(100);Burkholderiales(100);Alcaligenaceae(100);unclassified(100);unclassified(100);unclassified(100);unclassified(100); |     |     |     |     |     |     |    |    |    |     |    |      |      |    |   |    |     |    |     |     |      |    |    |     |      |     |    |     |
| Otu0094                                                                                                                                                                                                                                                                                                                                                                                                                                                                                                                                                                                                                                                                                                                                                                                                                                               | 0   | 0   | 0   | 0   | 3   | 3   | 0  | 0  | 0  | 5   | 0  | 0    | 0    | 0  | 0 | 0  | 0   | 0  | 0   | 0   | 0    | 0  | 15 | 0   | 0    | 4   | 10 | 133 |
|                                                                                                                                                                                                                                                                                                                                                                                                                                                                                                                                                                                                                                                                                                                                                                                                                                                       | 8   | 0   | 0   | 0   | 0   | 0   | 0  | 0  | 1  | 0   | 0  | 0    | 0    | 2  | 0 | 1  | 22  | 0  | 4   | 0   | 0    | 1  | 0  | 0   | 0    | 0   | 0  | 0   |
|                                                                                                                                                                                                                                                                                                                                                                                                                                                                                                                                                                                                                                                                                                                                                                                                                                                       | 0   | 0   | 0   | 0   | 0   | 0   | 9  | 0  | 0  | 0   | 0  | 0    | 0    | 0  | 0 | 0  | 0   | 0  | 0   | 0   | 0    | 10 | 0  | 0   | 0    | 0   | 0  | 0   |
|                                                                                                                                                                                                                                                                                                                                                                                                                                                                                                                                                                                                                                                                                                                                                                                                                                                       | 2   | 0   | 0   | 0   | 0   | 0   | 0  | 0  | 1  | 0   | 0  | 0    | 0    | 0  | 5 | 0  | 0   | 0  | 0   | 0   | 0    | 5  | 0  | 11  | 0    | 0   |    |     |
| M02255_76_000000000-ADUNE_1_2111_10614_24517 TG---AC---AG-AA-GAA-----GCA-C-C-----G--G--C---T--AACT-CCG-TG-----CC-AG-C-A-GCC-GC-----GG--T-----AA-TA-CG-GA-----G-GG-T-G-C-G-----G--T-TT-G-T-T--<br>-----AA---T-C-G-A-----G-A-A-G--TG--A-AA-GC--C-C-CG-G-G----CT-C-AA-----C-C-T-G-G-G-A-A-C---T-G--C-A---T--T-----T--CG-A-A--C-----T--G-G--CA--A-A-C---T-A-G-A-G-T--G---T-GA----TA-G-A-----G-G-G-T---GG-T-----AG--A--ATT---<br>-T-C-A-G-GT--GT-A-G-CG-GT--G---A--A-A---TG-C-GT-AG--AG-A-TC--T-G--A-A-G-G-A-AT-A-CC---GA--T--G--GC-GAA-G--G-C--A-----G--C-C-A-C---CTG--G--GT-C-A-----A-C---A-C-T--GA--CG-C-T-C--A-TG--T-A-CG-A--AA-G-C---G-TG--<br>GG-G--AG-C-A-AA-----CG--GG Bacteria(100);Proteobacteria(100);Gammaproteobacteria(100);Alteromonadales(100);unclassified(99);unclassified(99);unclassified(99);unclassified(99);unclassified(99);       |     |     |     |     |     |     |    |    |    |     |    |      |      |    |   |    |     |    |     |     |      |    |    |     |      |     |    |     |



|                                                                                                                                                                                                                                                                                                                                                                                                                                                                                                                                                                                                                                                                                                                                                                                                                               |   |     |    |     |    |    |    |     |     |    |     |    |    |     |    |    |     |    |    |    |    |    |    |    |   |    |     |
|-------------------------------------------------------------------------------------------------------------------------------------------------------------------------------------------------------------------------------------------------------------------------------------------------------------------------------------------------------------------------------------------------------------------------------------------------------------------------------------------------------------------------------------------------------------------------------------------------------------------------------------------------------------------------------------------------------------------------------------------------------------------------------------------------------------------------------|---|-----|----|-----|----|----|----|-----|-----|----|-----|----|----|-----|----|----|-----|----|----|----|----|----|----|----|---|----|-----|
| Otu0095                                                                                                                                                                                                                                                                                                                                                                                                                                                                                                                                                                                                                                                                                                                                                                                                                       | 0 | 0   | 0  | 0   | 0  | 0  | 20 | 0   | 0   | 0  | 0   | 0  | 0  | 0   | 0  | 0  | 0   | 0  | 6  | 0  | 1  | 0  | 0  | 0  | 0 | 0  |     |
| 3                                                                                                                                                                                                                                                                                                                                                                                                                                                                                                                                                                                                                                                                                                                                                                                                                             | 0 | 0   | 1  | 20  | 0  | 0  | 0  | 0   | 0   | 7  | 0   | 24 | 0  | 29  | 0  | 1  | 22  | 0  | 0  | 0  | 0  | 14 | 0  | 0  | 0 | 0  |     |
| 0                                                                                                                                                                                                                                                                                                                                                                                                                                                                                                                                                                                                                                                                                                                                                                                                                             | 0 | 0   | 1  | 0   | 0  | 0  | 0  | 0   | 0   | 0  | 0   | 0  | 0  | 2   | 0  | 27 | 93  | 0  | 0  | 0  | 0  | 0  | 0  | 0  | 0 | 0  |     |
| 36                                                                                                                                                                                                                                                                                                                                                                                                                                                                                                                                                                                                                                                                                                                                                                                                                            | 0 | 127 | 22 | 0   | 42 | 0  | 0  | 0   | 36  | 0  | 0   | 0  | 77 | 0   | 26 | 0  | 34  | 12 | 12 | 0  | 3  | 0  | 0  | 0  | 0 | 0  |     |
| M02255_77_000000000-ADUT3_1_1112_9263_9387 T---AC---GT-AG-GGT-----GCG-A-G-----C-G-T---T-GT-C-CGG-AA-----TT-A-T-T-GG-GC-----GT-A---AA-GA-GC-TT-----G-TA-G-G-C-G-----G-C-TT-G-T-C-----GC-<br>---G-T-C-T-----G-C-T-G-TG-A-AA-GC--C-C-GG-G-G----CT-T-AA-----C-C-C-C-G-G-G--T-C---T-G--C-A--G-T-----G--GG-T-A--C-----G--G-G-CA-G-G-C---T-A-G-A-G-T-G---T-GG---TA-G-G-----G-G-A-G--AC-T-----GG-A-ATT---C-C-T-G-<br>GT--GT-A-G-CG-GT--G---G--A-A---TG-C-GC-AG--AT-A-TC-A-G--G-A-G-G-A-AC-A-CC--GA-T--G-GC-GAA-G-G-C-A-----G--G-T-C-T---CTG-G-G-GC-C-A-----T-T--A-C-T-GA-CG-C-T-G--A-GA-A-G-CG-A-AA-G-C--G-TG--GG-G--AG-<br>C-G-AA-----CA--GG Bacteria(100);Actinobacteria(100);Actinobacteria(100);Actinobacteridae(100);Actinomycetales(100);Micrococcineae(100);Intrasporangiaceae(70);unclassified(66);unclassified(66);          |   |     |    |     |    |    |    |     |     |    |     |    |    |     |    |    |     |    |    |    |    |    |    |    |   |    |     |
| Otu0096                                                                                                                                                                                                                                                                                                                                                                                                                                                                                                                                                                                                                                                                                                                                                                                                                       | 0 | 0   | 0  | 0   | 0  | 0  | 0  | 0   | 0   | 0  | 0   | 0  | 0  | 0   | 0  | 0  | 0   | 0  | 0  | 0  | 16 | 5  | 0  | 0  | 0 | 0  |     |
| 0                                                                                                                                                                                                                                                                                                                                                                                                                                                                                                                                                                                                                                                                                                                                                                                                                             | 0 | 0   | 74 | 0   | 0  | 0  | 0  | 0   | 0   | 0  | 0   | 0  | 0  | 137 | 43 | 0  | 0   | 0  | 0  | 0  | 71 | 7  | 0  | 0  | 0 | 0  |     |
| 0                                                                                                                                                                                                                                                                                                                                                                                                                                                                                                                                                                                                                                                                                                                                                                                                                             | 0 | 0   | 0  | 0   | 0  | 0  | 0  | 0   | 0   | 0  | 0   | 0  | 0  | 19  | 0  | 12 | 16  | 0  | 0  | 0  | 6  | 0  | 0  | 0  | 0 | 0  |     |
| 0                                                                                                                                                                                                                                                                                                                                                                                                                                                                                                                                                                                                                                                                                                                                                                                                                             | 0 | 0   | 0  | 0   | 0  | 6  | 0  | 0   | 0   | 0  | 0   | 0  | 0  | 0   | 34 | 0  | 0   | 32 | 0  | 0  | 0  | 0  | 0  | 0  | 0 | 0  |     |
| M02255_77_000000000-ADUT3_1_1108_16420_15451 T---AC---GA-AG-GGG-----GCT-A-G-----C-G-T---T-GT-T-CGG-AT-----TT-A--C-T-GG-GC-----GT--A---AA-GC-GC-AC-----G-TA-G-G-C-G-----G--A-TT-G-T-T-----<br>-----AA---G-T-C-A-----G-G-G--G-TG-A-AA-TC--C-T-GG-A-G----CT-C-AA-----C-T-C-C-A-G-A--A-C---T-G--C-C---T-T-----T-GA-T-A--C-----T--G-G-CA-A-T-C---T-C-G-A-G-T--C---C-GG---AA-G-A-----G-G-T-A--AG-T-----GG--A--ACT---C-<br>C-T-A-GT--GT-A-G-AG-GT--G---G--A-A---TT-C-GT-AG--AT-A-TT-A-G--G-A-A-G-A-AC-A-CC--AG--T--G-GC-GAA-G-G-C-G-----G--C-T-T-A---CTG-G--TC-C-G-----G-T--A-C-T-GA-CG-C-T-G--A-GG--T-G-CG-A-AA-G-C--G-TG--GG-G-<br>-AG-C-A-AA-----CA--GG Bacteria(100);Proteobacteria(100);Alphaproteobacteria(100);Rhizobiales(100);Hyphomicrobiaceae(100);Devosia(100);unclassified(100);unclassified(100);unclassified(100);    |   |     |    |     |    |    |    |     |     |    |     |    |    |     |    |    |     |    |    |    |    |    |    |    |   |    |     |
| Otu0097                                                                                                                                                                                                                                                                                                                                                                                                                                                                                                                                                                                                                                                                                                                                                                                                                       | 0 | 0   | 0  | 0   | 0  | 63 | 16 | 106 | 195 | 30 | 0   | 0  | 0  | 0   | 0  | 0  | 6   | 5  | 0  | 21 | 0  | 0  | 0  | 13 | 0 | 0  | 0   |
| 5                                                                                                                                                                                                                                                                                                                                                                                                                                                                                                                                                                                                                                                                                                                                                                                                                             | 0 | 3   | 1  | 0   | 0  | 0  | 33 | 0   | 0   | 58 | 0   | 0  | 0  | 66  | 0  | 0  | 0   | 1  | 0  | 0  | 0  | 37 | 17 | 23 | 0 | 0  | 115 |
| 20                                                                                                                                                                                                                                                                                                                                                                                                                                                                                                                                                                                                                                                                                                                                                                                                                            | 0 | 0   | 0  | 6   | 0  | 0  | 0  | 3   | 0   | 4  | 0   | 25 | 0  | 0   | 17 | 21 | 128 | 0  | 0  | 0  | 17 | 0  | 0  | 0  | 1 | 12 | 88  |
| 0                                                                                                                                                                                                                                                                                                                                                                                                                                                                                                                                                                                                                                                                                                                                                                                                                             | 0 | 0   | 0  | 124 | 0  | 11 | 3  | 0   | 0   | 0  | 18  | 0  | 0  | 0   | 64 | 0  | 0   | 0  | 0  | 0  | 0  | 1  | 0  | 0  | 0 | 0  |     |
| M02255_77_000000000-ADUT3_1_1110_27089_11132 T---AC---GG-AG-GGG-----GTT-A-G-----C-G-T---T-GT-T-CGG-AA-----TG-A--C-T-GG-GC-----GT-A---AA-GC-GC-GC-----G-TA-G-G-C-G-----G--A-TC-A-T-C-----<br>-----AA---G-T-C-G-----G-G-G--G-TG-A-AA-TC--C-C-GG-G-G----CT-C-AA-----C-C-C-C-G-G-A--A-T---G-G--C-C---T-T-----C--GA-G-A--C-----T--G-G-TG--G-T-C---T-T-G-A-G-T--T--C-GA---GA-G-A-----G-G-T-G--AG-T-----GG--A--ATT---<br>C-C-G-A-GT--GT-A-G-AG-GT--G---A--A-A---TT-C-GT-AG--AT-A-TT--C-G--G-A-G-G-A-AC-A-CC--AG--T--G-GC-GAA-G-G-C-G-----G--C-T-C-A---CTG-G--CT-C-G-----A-C--A-C-T-GA-CG-C-T-G--A-GG--T-G-CG-A-AA-G-C--G-TG--GG-<br>G--AG-C-A-AA-----CA--GG Bacteria(100);Proteobacteria(100);Alphaproteobacteria(100);Rhodobacterales(95);Rhodobacteraceae(95);unclassified(95);unclassified(95);unclassified(95);unclassified(95); |   |     |    |     |    |    |    |     |     |    |     |    |    |     |    |    |     |    |    |    |    |    |    |    |   |    |     |
| Otu0098                                                                                                                                                                                                                                                                                                                                                                                                                                                                                                                                                                                                                                                                                                                                                                                                                       | 0 | 0   | 0  | 1   | 0  | 0  | 0  | 0   | 0   | 1  | 232 | 10 | 0  | 0   | 2  | 0  | 0   | 4  | 1  | 0  | 0  | 0  | 0  | 0  | 0 | 0  | 0   |
| 0                                                                                                                                                                                                                                                                                                                                                                                                                                                                                                                                                                                                                                                                                                                                                                                                                             | 0 | 0   | 0  | 0   | 0  | 0  | 0  | 0   | 0   | 7  | 0   | 0  | 0  | 0   | 0  | 1  | 1   | 12 | 0  | 2  | 0  | 0  | 0  | 0  | 0 | 0  | 0   |
| 0                                                                                                                                                                                                                                                                                                                                                                                                                                                                                                                                                                                                                                                                                                                                                                                                                             | 0 | 0   | 0  | 0   | 0  | 0  | 0  | 6   | 0   | 0  | 0   | 0  | 0  | 0   | 1  | 0  | 2   | 0  | 0  | 0  | 1  | 17 | 0  | 0  | 0 | 0  | 0   |
| 0                                                                                                                                                                                                                                                                                                                                                                                                                                                                                                                                                                                                                                                                                                                                                                                                                             | 0 | 0   | 0  | 0   | 0  | 2  | 4  | 1   | 6   | 0  | 0   | 0  | 0  | 0   | 0  | 0  | 0   | 0  | 0  | 0  | 0  | 0  | 0  | 0  | 0 | 0  |     |
| M02255_77_000000000-ADUT3_1_1112_19794_4386 .....AC---T-AC-G                                                                                                                                                                                                                                                                                                                                                                                                                                                                                                                                                                                                                                                                                                                                                                  |   |     |    |     |    |    |    |     |     |    |     |    |    |     |    |    |     |    |    |    |    |    |    |    |   |    |     |



[illegible]



|                                                                                                                                                                                                                                                                                                                                                                                                                                                                                                                                                                                                                                                                                                                                                                                                                               |     |    |     |    |     |    |     |    |    |    |    |    |    |     |     |     |     |    |    |    |     |    |     |   |    |     |  |
|-------------------------------------------------------------------------------------------------------------------------------------------------------------------------------------------------------------------------------------------------------------------------------------------------------------------------------------------------------------------------------------------------------------------------------------------------------------------------------------------------------------------------------------------------------------------------------------------------------------------------------------------------------------------------------------------------------------------------------------------------------------------------------------------------------------------------------|-----|----|-----|----|-----|----|-----|----|----|----|----|----|----|-----|-----|-----|-----|----|----|----|-----|----|-----|---|----|-----|--|
| Otu0105                                                                                                                                                                                                                                                                                                                                                                                                                                                                                                                                                                                                                                                                                                                                                                                                                       | 0   | 0  | 0   | 0  | 178 | 0  | 0   | 0  | 29 | 0  | 0  | 0  | 0  | 0   | 0   | 0   | 0   | 0  | 0  | 5  | 0   | 0  | 0   | 0 | 0  | 0   |  |
|                                                                                                                                                                                                                                                                                                                                                                                                                                                                                                                                                                                                                                                                                                                                                                                                                               | 0   | 2  | 0   | 0  | 0   | 0  | 105 | 0  | 47 | 2  | 0  | 0  | 0  | 0   | 0   | 0   | 0   | 0  | 0  | 0  | 0   | 0  | 0   | 0 | 0  | 0   |  |
|                                                                                                                                                                                                                                                                                                                                                                                                                                                                                                                                                                                                                                                                                                                                                                                                                               | 0   | 0  | 0   | 0  | 0   | 0  | 0   | 0  | 0  | 0  | 0  | 4  | 0  | 78  | 8   | 0   | 129 | 0  | 0  | 0  | 0   | 0  | 106 | 0 | 0  | 0   |  |
|                                                                                                                                                                                                                                                                                                                                                                                                                                                                                                                                                                                                                                                                                                                                                                                                                               | 0   | 0  | 0   | 0  | 0   | 0  | 0   | 0  | 0  | 4  | 0  | 0  | 0  | 0   | 36  | 0   | 0   | 0  | 0  | 0  | 0   | 0  | 0   | 0 | 0  | 0   |  |
| M02255_77_000000000-ADUT3_1_1101_15477_10244 T---AC---GG-AG-GGA-----GCT-A-G-----C-G-T---T-GT-T-CGG-AA-----TT-A--C-T-GG-GC-----GT--A----AA-GC-GC-AC-----G-TA-G-G-C-G-----G--C-TT-T-G-T-----AA---G-T-T-A-----G-A-G--G-TG--A-AA-GC--C-C-GG-G-G-----CT-C-AA-----C-C-C-C-G-G-A--A-T---T-G--C-C---T-T-----T-AA-G-A--C-----T-G-C--AT--C-G-C---T-T-G-A-A-T--C--C-GG----GA-G-A-----G-G-T-G---AG-T-----GG--A--ATT---C-C-G-A-GT--GT-A-G-AG-GT--G---A--A-A---TT-C-GT-AG--AT-A-TT--C-G--G-A-A-G-A-AC-A-CC--AG--T--G--GC-GAA-G--G-C-G-----G--C-T-C-A--CTG--G--AC-C-G-----G-T--A-T-T--GA--CG-C-T-G--A-GG--T-G-CG-A--AA-G-C---G-TG--GG--G--AG-C-A-AA-----CA--GG Bacteria(100);Proteobacteria(100);Alphaproteobacteria(100);Sphingomonadales(100);unclassified(97);unclassified(97);unclassified(97);unclassified(97);unclassified(97);        |     |    |     |    |     |    |     |    |    |    |    |    |    |     |     |     |     |    |    |    |     |    |     |   |    |     |  |
| Otu0106                                                                                                                                                                                                                                                                                                                                                                                                                                                                                                                                                                                                                                                                                                                                                                                                                       | 0   | 0  | 0   | 0  | 0   | 0  | 0   | 0  | 0  | 0  | 0  | 0  | 0  | 8   | 3   | 0   | 4   | 1  | 0  | 0  | 0   | 1  | 0   | 0 | 0  | 0   |  |
|                                                                                                                                                                                                                                                                                                                                                                                                                                                                                                                                                                                                                                                                                                                                                                                                                               | 0   | 0  | 0   | 0  | 0   | 0  | 0   | 0  | 0  | 0  | 0  | 0  | 0  | 1   | 0   | 0   | 0   | 10 | 1  | 0  | 0   | 0  | 0   | 0 | 5  | 0   |  |
|                                                                                                                                                                                                                                                                                                                                                                                                                                                                                                                                                                                                                                                                                                                                                                                                                               | 0   | 0  | 0   | 0  | 0   | 1  | 19  | 0  | 19 | 1  | 6  | 8  | 8  | 7   | 11  | 0   | 0   | 0  | 0  | 0  | 0   | 0  | 0   | 0 | 0  | 0   |  |
|                                                                                                                                                                                                                                                                                                                                                                                                                                                                                                                                                                                                                                                                                                                                                                                                                               | 0   | 0  | 0   | 0  | 0   | 0  | 1   | 2  | 0  | 3  | 0  | 26 | 0  | 0   | 0   | 0   | 0   | 0  | 0  | 0  | 0   | 0  | 0   | 0 | 0  | 0   |  |
| M02255_76_000000000-ADUNE_1_2104_5482_20190 G---AC---AG-AA-TAA-----GCA-C-C-----G-G-C---T--AACT-CTG-TG-----CC-A--G-C--AG-CC-----GC-G----GT-AA-TA-CA-----G-AG-G-G-T-G-----C--A-AG-C-G-T-----TA---A-T-C-G-----G-A-A--G-TG--A-AA-TC--C-C-CG-G-G-----CT-C-AA-----C-C-T-G-G-G-A--A-C---T-G--C-A--T-T-----C-AA-A-A--C-----T-G-A--CG-A-G-C---T-A-G-A-G-T-A--T-GG---TA-G-A-----G-G-G-T---GG-T-----GG--A--ATT---T-C-C-T-GT--GT-A-G-CG-GT--G---A--A-A---TG-C-GT-AG--AT-A-TA--G-G--A-A-G-G-A-AC-A-CC--AG--T--G--GC-GAA-G--G-C-G-----A--C-C-A-C--CTG--G--AC-T-G-----A-T--A-C-T--GA--CA-C-T-G--A-GG--T-G-CG-A--AA-G-C---G-TG--GG-G--AG-C-A-AA-----CA--GG Bacteria(100);Proteobacteria(100);Gammaproteobacteria(100);unclassified(88);unclassified(88);unclassified(88);unclassified(88);unclassified(88);unclassified(88);                  |     |    |     |    |     |    |     |    |    |    |    |    |    |     |     |     |     |    |    |    |     |    |     |   |    |     |  |
| Otu0107                                                                                                                                                                                                                                                                                                                                                                                                                                                                                                                                                                                                                                                                                                                                                                                                                       | 0   | 0  | 0   | 0  | 0   | 0  | 89  | 0  | 0  | 0  | 0  | 0  | 0  | 0   | 0   | 0   | 0   | 0  | 0  | 0  | 0   | 0  | 0   | 0 | 0  | 25  |  |
|                                                                                                                                                                                                                                                                                                                                                                                                                                                                                                                                                                                                                                                                                                                                                                                                                               | 1   | 0  | 71  | 0  | 46  | 0  | 180 | 0  | 0  | 0  | 17 | 49 | 49 | 101 | 136 | 0   | 0   | 0  | 0  | 0  | 0   | 0  | 73  | 0 | 0  | 49  |  |
|                                                                                                                                                                                                                                                                                                                                                                                                                                                                                                                                                                                                                                                                                                                                                                                                                               | 0   | 55 | 203 | 0  | 76  | 32 | 0   | 0  | 54 | 28 | 0  | 0  | 0  | 32  | 5   | 162 | 29  | 0  | 12 | 0  | 0   | 28 | 0   | 0 | 1  | 440 |  |
|                                                                                                                                                                                                                                                                                                                                                                                                                                                                                                                                                                                                                                                                                                                                                                                                                               | 118 | 72 | 204 | 0  | 51  | 0  | 32  | 0  | 60 | 0  | 0  | 0  | 61 | 0   | 0   | 0   | 0   | 0  | 35 | 0  | 0   | 0  | 0   | 0 | 0  | 51  |  |
| M02255_77_000000000-ADUT3_1_2104_9065_11564 T---AC---GA-AG-GGG-----GCT-A-G-----C-G-T---T--GC-T-CGG-AA-----TT-A--C-T--GG-GC-----GT--A----AA-GG-GA-GC-----G-TA-G-G-C-G-----G--A-CA-T-T-T-----AA---G-T-C-A-----G-G-G--G-TG--A-AA-TC--C-C-GG-G-G-----CT-C-AA-----C-C-T-C-G-G-A--A-T---T-G--C-C---T-T-----T-GA-T-A--C-----T-G-G--GT--G-T-C---T-T-G-A-G-T-A--T-GA---GA-G-A-----G-G-T-A--TG-T-----GG--A--ACT---C-C-G-A-GT--GT-A-G-AG-GT--G---A--A-A---TT-C-GT-AG--AT-A-TT--C-G--G-A-A-G-A-AC-A-CC--AG--T--G--GC-GAA-G--G-C-G-----A--C-A-T-A--CTG--G--CT-C-A-----T-T--A-C-T--GA--CG-C-T-G--A-GG--C-T-CG-A--AA-G-C---G-TG--GG-G--AG-C-A-AA-----CA--GG Bacteria(100);Proteobacteria(100);Alphaproteobacteria(100);Caulobacteriales(100);Caulobacteraceae(100);Brevundimonas(100);unclassified(100);unclassified(100);unclassified(100); |     |    |     |    |     |    |     |    |    |    |    |    |    |     |     |     |     |    |    |    |     |    |     |   |    |     |  |
| Otu0108                                                                                                                                                                                                                                                                                                                                                                                                                                                                                                                                                                                                                                                                                                                                                                                                                       | 0   | 0  | 0   | 0  | 0   | 0  | 0   | 0  | 43 | 0  | 0  | 0  | 0  | 0   | 0   | 0   | 0   | 0  | 0  | 0  | 0   | 0  | 0   | 0 | 0  | 0   |  |
|                                                                                                                                                                                                                                                                                                                                                                                                                                                                                                                                                                                                                                                                                                                                                                                                                               | 0   | 0  | 54  | 0  | 0   | 0  | 83  | 0  | 0  | 0  | 0  | 0  | 0  | 0   | 0   | 0   | 0   | 0  | 0  | 0  | 0   | 0  | 0   | 0 | 0  | 271 |  |
|                                                                                                                                                                                                                                                                                                                                                                                                                                                                                                                                                                                                                                                                                                                                                                                                                               | 0   | 0  | 0   | 0  | 0   | 0  | 0   | 0  | 0  | 0  | 0  | 0  | 0  | 0   | 2   | 0   | 18  | 0  | 0  | 0  | 0   | 0  | 0   | 0 | 0  | 0   |  |
|                                                                                                                                                                                                                                                                                                                                                                                                                                                                                                                                                                                                                                                                                                                                                                                                                               | 0   | 0  | 0   | 0  | 24  | 0  | 0   | 0  | 10 | 0  | 0  | 0  | 0  | 0   | 0   | 0   | 0   | 0  | 0  | 0  | 0   | 0  | 0   | 0 | 0  | 0   |  |
| M02255_77_000000000-ADUT3_1_1102_20113_10044 T---AC---GT-AG-GGG-----TCG-A-G-----C-G-T---T--GT-C-CGG-AG-----TT-A--C-T--GG-GC-----GT--A----AA-GC-GT-GC-----G-CA-G-G-C-G-----G--C-TC-A-T-T-----GC---G-C-C-C-----G-G-C--G-TG--A-AA-GC--C-C-CC-G-G-----CT-C-AA-----C-C-G-G-G-G-A--G-G---G-T-C-G---T-C-----G--GG-G-A--C-----G-G-G--TG--A-G-C---T-T-G-A-G-G--G---T-AT---CA-G-G-----G-G-C-T--GG-T-----GG--A--ATT---C-C-C-C-G-GT--GT-A-G-TG-GT--G---A--A-A---TG-C-GT-AG--AG-A-TC--G-G--G-A-G-G-A-AC-A-CC--CG--T--G--GC-GAA-G--G-C-G-----G--C-C-A-G---CTG--G--GA-T-A-----C-A--C-C-T--GA--CG-C-T-G--A-GG--C-A-CG-A--AG-G-C---G-TG--GG-G--AG-C-G-AA-----CG--GG Bacteria(100);Chloroflexi(100);Thermomicrobia(100);JG30-KF-CM45(100);unclassified(100);unclassified(100);unclassified(100);unclassified(100);unclassified(100);            |     |    |     |    |     |    |     |    |    |    |    |    |    |     |     |     |     |    |    |    |     |    |     |   |    |     |  |
| Otu0109                                                                                                                                                                                                                                                                                                                                                                                                                                                                                                                                                                                                                                                                                                                                                                                                                       | 36  | 17 | 0   | 39 | 18  | 9  | 11  | 15 | 11 | 3  | 0  | 0  | 0  | 1   | 0   | 0   | 0   | 0  | 3  | 0  | 2   | 0  | 0   | 0 | 1  | 0   |  |
|                                                                                                                                                                                                                                                                                                                                                                                                                                                                                                                                                                                                                                                                                                                                                                                                                               | 4   | 0  | 27  | 16 | 9   | 2  | 16  | 0  | 4  | 19 | 24 | 8  | 17 | 9   | 36  | 52  | 20  | 29 | 0  | 40 | 4   | 1  | 0   | 9 | 2  | 1   |  |
|                                                                                                                                                                                                                                                                                                                                                                                                                                                                                                                                                                                                                                                                                                                                                                                                                               | 4   | 1  | 13  | 0  | 0   | 0  | 1   | 0  | 0  | 2  | 0  | 0  | 0  | 6   | 0   | 15  | 2   | 0  | 9  | 0  | 0   | 4  | 0   | 0 | 83 | 8   |  |
|                                                                                                                                                                                                                                                                                                                                                                                                                                                                                                                                                                                                                                                                                                                                                                                                                               | 17  | 27 | 14  | 31 | 66  | 15 | 5   | 4  | 0  | 15 | 1  | 0  | 1  | 37  | 0   | 2   | 14  | 46 | 1  | 94 | 143 | 10 | 5   | 0 | 11 | 16  |  |
| M02255_77_000000000-ADUT3_1_1105_10953_11523 T---AA---CT-AC-GTG-----CC--A-G-----C--A--G---C--CG-C-GGT-AA-----TA-C--G-T--AG-GT-----CC--C----GA-GC-G--TT-----G---T-C-C-G-----G--T-TT-G-A-T-----AA---G-T-C-T-----G-A-A--G-TT--A-AA-GG--C-T-GT-G-G-----CT-C-AA-----C-C-A-T-A-G-T--T-----C-G--C-T---T-T-----G--GA-A-A--C-----T-G-T--CA--A-A-C---T-T-G-A-G-T-G---C-AG---AA-G-G-----G-G-A-G---AG-T-----GG--A--ATT---C-C-A-T-GT--GT-A-G-CG-GT--G---A--A-A---TG-C-GT-AG--AT-A-TA--T-G--G-A-G-G-A-AC-A-CC--GG--T--G--GC-GAA-A--G-C-G-----G--C-T-C-T---CTG--G--TC-T-G-----T-A---A-C-T--GA--CG-C-T-G--A-GG--C-T-CG-A--AA-G-C---G-TG--GG-G--AG-C-G-AA-----CA--GG Bacteria(100);Firmicutes(100);Bacilli(100);Lactobacillales(100);Streptococcaceae(100);Streptococcus(100);unclassified(100);unclassified(100);unclassified(100);           |     |    |     |    |     |    |     |    |    |    |    |    |    |     |     |     |     |    |    |    |     |    |     |   |    |     |  |



Otu0110 0 0 0 0 0 0 0 0 0 0 0 0 0 0 0 0 0 0 0 0 0 0 0 0 0 0 0 0  
222 0 1 1 0 0 0 63 0 0 13 1 0 0 1 0 0 87 0 0 0 0 0 0 0 0 0 1 0  
0 0 0 0 18 0 0 0 0 2 0 6 0 9 71 25 0 0 0 388 183 0 1 0 93 0 0 0 93  
0 0 0 0 36 1771 6 50 0 405 0 1401 3 7 7 0 0 0 0 0 0 29 0 0 0 36  
M02255\_77\_000000000-ADUT3\_1\_1105\_24267\_16865 T---AC---GT-AT-GTC-----GCA-A-G-----C--G--T---T--AT-C-CGG-AT-----TT-A--T-T--GG-GC-----GT-A----AA-GC-GC-GT-----C-TA-G-G-C-G-----G--C-AA-G-G-A-----  
----AA---G-T-C-T-----G-A-T--G--TG--A-AA-AT--G-C-GG-G-G----CT-C-AA-----C-T-C-C-G-T-A--T-----T-G--C-G--T--T-----G--GA-A-A--C-----T--G-C-CT--T-A-C---T-A-G-A-G-T--A--C-TG----GA-G-A-----G-G-T-A--GG-C-----GG--A--ACT---A-  
C-A-A-GT--GT-A-G-AG-GT--G---A--A-A---TT-C-GT-AG--AT-A-TT--T-G--T-A-G-G-A-AT-G-CC---GA--T--G--GG-GAA-G--C-C-A-----G--C-C-T-A---CTG--G--AC-A-G-----A-T---A-C-T--GA--CG-C-T-A--A-AG--C-G-CG-A--AA-G-C---G-TG--GG-T--  
AG-C-A-AA-----CA--GG Bacteria(100);Fusobacteria(100);Fusobacteria(100);Fusobacteriales(100);Fusobacteriaceae(100);Fusobacterium(100);unclassified(100);unclassified(100);unclassified(100);

Otu0111 0 0 0 0 0 0 0 0 0 0 0 2 11 58 17 10 0 0 7 3 0 6 0 0 1 2 1 0 0  
0 0 0 0 0 0 0 0 0 1 0 0 0 0 0 0 1 0 5 0 0 0 0 0 0 25 2 22 0  
0 1 4 0 0 0 0 9 2 39 0 0 2 60 0 3 0 0 0 0 0 0 0 0 0 0 0 0  
0 0 0 1 0 0 5 8 5 0 11 1 13 0 0 12 0 0 0 0 0 0 0 0 1 0 0  
M02255\_76\_000000000-ADUNE\_1\_1110\_23811\_11194 C---TA--AC-TC-TGT-----GCC-A-G-----C---A--G--CC-G-CGG-TA-----AT-A--C-A--GA-GG-----GT-----GC-AA-GC-----G-TT-A-A-T-C-----G--G-AA-G-T-T-----  
--AA---G-T-T-G-----G-A-T--G--TG--A-AA-TC--C-C-CG-G-G----CT-C-AA-----C-C-T-G-G-G-A--A-C---T-G--C-A--T--T-----C--AA-A-A--C-----T--G-A-CT--G-A-C---T-A-G-A-G-T--A--T-GG----TA-G-A-----G-G-G-T--GG-T-----GG--A--ATT---T-C-  
C-T-GT--GT-A-G-CG-GT--G---A--A-A---TG-C-GT-AG--AT-A-TA--G-G--A-A-G-G-A-AC-A-CC--AG--T--G--GC-GAA-G--G-C-G-----A--C-C-A-C---CTG--G--AC-T-G-----A-T---A-C-T--GA--CA-C-T-G--A-GG--T-G-CG-A--AA-G-C---G-TG--GG-G--  
AG-C-A-AA-----CA--GG Bacteria(100);Proteobacteria(100);Gammaproteobacteria(100);Pseudomonadales(100);Pseudomonadaceae(100);unclassified(76);unclassified(76);unclassified(76);unclassified(76);

Otu0112 0 0 0 0 0 0 0 0 0 0 0 0 1 8 2 0 1 0 3 0 1 3 0 0 0 0 0 0  
0 0 0 0 0 0 0 0 0 0 0 0 0 0 0 1 0 0 0 0 0 0 0 0 2 13 24 8 0  
4 0 0 0 1 0 0 0 6 1 0 3 2 11 0 0 0 0 0 0 0 1 0 0 0 0 0 0  
0 0 0 0 0 0 0 1 2 0 8 0 3 0 0 2 0 0 1 0 1 0 0 0 0 0 0  
M02255\_77\_000000000-ADUT3\_1\_1112\_9961\_8135 G---CC--AG-CA-GCC-----GCG-G-T-----A--A-T--A--CA-G-AGG-GT-----GC-A--A-G--CG-TT-----AA-T---CG-GA-AT-TA-----C-TA-G-G-T-G-----G--T-TT-G-T-T-----AA--  
--G-T-T-G-----G-A-T--G--TG--A-AA-TC--C-C-CG-G-G----CT-C-AA-----C-C-T-G-G-G-A--A-C---T-G--C-A--T--T-----C--AA-A-A--C-----T--G-A-CA--A-G-C---T-A-G-A-G-T--A--T-GG----TA-G-A-----G-G-G-T--GG-T-----GG--A--ATT---T-C-C-T-  
GT--GT-A-G-CG-GT--G---A--A-A---TG-C-GT-AG--AT-A-TA--G-G--A-A-G-G-A-AC-A-CC--AG--T--G--GC-GAA-G--G-C-G-----A--C-C-A-C---CTG--G--AC-T-G-----A-T---A-C-T--GA--CA-C-T-G--A-GG--T-G-CG-A--AA-G-C---G-TG--GG-G--AG-  
C-A-AA-----CA--GG Bacteria(100);Proteobacteria(100);Gammaproteobacteria(100);Pseudomonadales(100);Pseudomonadaceae(100);Pseudomonas(86);unclassified(86);unclassified(86);unclassified(86);

Otu0113 0 0 0 0 0 0 0 0 0 0 0 0 0 0 0 0 0 0 0 0 0 0 0 0 0 0 0 0  
0 0 0 0 0 0 0 0 0 0 0 0 0 0 12 0 0 0 0 0 0 0 0 0 0 0 0  
0 0 0 0 0 0 0 0 0 0 0 0 0 0 0 0 0 0 0 0 0 0 0 0 80 0 0 0  
56 0 0 113 39 0 18 0 0 31 0 0 0 0 0 0 0 0 20 0 0 0 0 0 0 0 0  
M02255\_77\_000000000-ADUT3\_1\_1105\_19552\_18674 T---AC---GA-AG-GGG-----GCT-A-G-----C--G--T---T--GT-T-CGG-AA-----TC-A--C-T--GG-GC-----GT--A----AA-GC-GC-AC-----G-TA-G-G-C-G-----G--A-TC-T-T-T-----  
-----AA---G-T-C-A-----G-A-G--G--TG--A-AA-TC--C-C-AA-G-G----CT-C-AA-----C-C-T-T-G-G-A--A-C---T-G--C-C--T--T-----T--GA-T-A--C-----T--G-G--GG--A-T-C---T-C-G-A-G-T--C---C-GG----GA-G-A-----G-G-T-G--AG-T-----GG--A--ACT---  
G-C-G-A-GT--GT-A-G-AG-GT--G---A--A-A---TT-C-GT-AG--AT-A-TT--C-G--C-A-A-G-A-AC-A-CC--AG--T--G--GC-GAA-G--G-C-G-----G--C-T-C-A---CTG--G--CC-C-G-----G-T---A-C-T--GA--CG-C-T-G--A-GG--T-G-CG-A--AA-G-C---G-TG--GG-  
G--AG-C-A-AA-----CA--GG Bacteria(100);Proteobacteria(100);Alphaproteobacteria(100);Rhizobiales(100);unclassified(100);unclassified(100);unclassified(100);unclassified(100);unclassified(100);

Otu0114 0 0 0 0 0 0 0 0 0 0 0 0 0 3 0 0 0 4 0 0 1 4 2 0 0 0 0 0  
0 0 0 0 0 0 0 0 0 0 0 0 0 0 0 0 0 0 20 0 0 0 5 0 0 1 0 3 0  
0 0 0 11 0 1 0 0 0 0 0 0 0 1 0 0 0 0 0 0 0 0 0 0 0 0 0 0  
0 0 0 0 0 0 1 2 2 0 0 2 1 0 1 0 0 0 0 0 0 0 0 0 0 0 0  
M02255\_76\_000000000-ADUNE\_1\_1115\_9993\_22072 G---AC---AG-AA-TAA-----GCA-C-C-----G--G--C---T--AA---C-T-CT-----GT-G--C-C--AG-CA-----GC--C---GC-G--GT-AA-----T-AC-A-G-A-G-----G--T-GT-G-C-A-----AG---  
-C-G-T-T-----A-A-T--C--GG--A-AA-TC--C-C-CG-G-G----CT-C-AA-----C-C-T-G-G-G-A--A-C---T-G--C-A--T--C-----C--AA-A-A--C-----T--G-G--CA--A-G-C---T-A-G-A-G-T--A--T-GG----TA-G-A-----G-G-G-T--AG-T-----GG--A--ATT---T-C-C-T-GT-  
-GT-A-G-CG-GT--G---A--A-A---TG-C-GT-AG--AT-A-TA--G-G--A-A-G-G-A-AC-A-CC--AG--T--G--GC-GAA-G--G-C-G-----A--C-T-A-C---CTG--G--AC-T-G-----A-T---A-C-T--GA--CA-C-T-G--A-GG--T-G-CG-A--AA-G-C---G-TG--GG-G--AG-C-A-  
AA-----CA--GG Bacteria(100);Proteobacteria(100);Gammaproteobacteria(100);unclassified(100);unclassified(100);unclassified(100);unclassified(100);unclassified(100);unclassified(100);



[illegible]



|         |                                                                                                                                                                                                                      |    |     |    |    |    |    |    |    |    |    |    |    |    |    |    |    |    |    |    |    |    |    |   |    |    |     |   |
|---------|----------------------------------------------------------------------------------------------------------------------------------------------------------------------------------------------------------------------|----|-----|----|----|----|----|----|----|----|----|----|----|----|----|----|----|----|----|----|----|----|----|---|----|----|-----|---|
| Otu0120 | 0                                                                                                                                                                                                                    | 0  | 0   | 0  | 0  | 0  | 14 | 90 | 0  | 0  | 0  | 1  | 0  | 0  | 0  | 0  | 0  | 2  | 2  | 0  | 0  | 0  | 5  | 0 | 0  | 0  | 8   |   |
|         | 0                                                                                                                                                                                                                    | 0  | 81  | 0  | 0  | 25 | 0  | 0  | 0  | 0  | 19 | 0  | 0  | 49 | 0  | 0  | 0  | 0  | 0  | 0  | 0  | 58 | 7  | 0 | 0  | 0  | 0   |   |
|         | 0                                                                                                                                                                                                                    | 0  | 0   | 0  | 8  | 7  | 0  | 11 | 0  | 0  | 0  | 0  | 0  | 0  | 1  | 0  | 30 | 0  | 49 | 14 | 0  | 1  | 0  | 0 | 0  | 0  | 54  | 0 |
|         | 12                                                                                                                                                                                                                   | 60 | 163 | 9  | 0  | 0  | 6  | 0  | 0  | 9  | 0  | 4  | 0  | 0  | 57 | 0  | 0  | 38 | 20 | 0  | 79 | 0  | 0  | 0 | 0  | 0  |     |   |
|         | M02255_77_000000000-ADUT3_1_2109_13889_11952 T---AC--GA-AG-GGG-----GCT-A-G----C-G-T--T-GC-T-CGG-AA-----TT-A-C-T-GG-GC-----GT-A----AA-GG-GA-GC-----G-TA-G-G-C-G-----G-A-CA-T-T-T----                                  |    |     |    |    |    |    |    |    |    |    |    |    |    |    |    |    |    |    |    |    |    |    |   |    |    |     |   |
|         | -----AA---G-T-C-A-----G-G-G--G-TG--A-AA-TC--C-C-AG-A-G----CT-C-AA-----C-T-C-T-G-G-A--A-C---T-G--C-C---T-T-----T-GA-T-A--C-----T-G-G--GT-G-T-C---T-T-G-A-G-T-G---T-GA-----GA-G-A-----G-G-T-A--TG-T-----GG-A--ACT---C- |    |     |    |    |    |    |    |    |    |    |    |    |    |    |    |    |    |    |    |    |    |    |   |    |    |     |   |
|         | C-G-A-GT--GT-A-G-AG-GT--G---A-A-A---TT-C-GT-AG--AT-A-TT--C-G--G-A-A-G-A-AC-A-CC--AG--T-G--GC-GAA-G--G-C-G-----A-C-A-T-A---CTG-G--CT-C-A-----T-T--A-C-T--GA--CG-C-T-G--A-GG--C-T-CG-A--AA-G-C---G-TG--GG-G-           |    |     |    |    |    |    |    |    |    |    |    |    |    |    |    |    |    |    |    |    |    |    |   |    |    |     |   |
|         | -AG-C-A-AA-----CA--GG Bacteria(100);Proteobacteria(100);Alphaproteobacteria(100);Caulobacterales(100);Caulobacteraceae(100);Brevundimonas(100);unclassified(100);unclassified(100);unclassified(100);                |    |     |    |    |    |    |    |    |    |    |    |    |    |    |    |    |    |    |    |    |    |    |   |    |    |     |   |
| Otu0121 | 0                                                                                                                                                                                                                    | 71 | 0   | 0  | 0  | 5  | 0  | 0  | 27 | 0  | 0  | 0  | 0  | 0  | 0  | 0  | 0  | 4  | 1  | 16 | 5  | 27 | 3  | 0 | 4  | 1  | 0   |   |
|         | 0                                                                                                                                                                                                                    | 2  | 3   | 0  | 0  | 48 | 0  | 1  | 0  | 46 | 2  | 31 | 0  | 70 | 0  | 0  | 0  | 34 | 70 | 0  | 2  | 0  | 15 | 0 | 0  | 27 | 126 |   |
|         | 5                                                                                                                                                                                                                    | 0  | 0   | 4  | 0  | 0  | 0  | 0  | 4  | 2  | 3  | 0  | 10 | 88 | 0  | 1  | 86 | 0  | 65 | 0  | 0  | 2  | 0  | 0 | 0  | 0  | 250 |   |
|         | 0                                                                                                                                                                                                                    | 17 | 0   | 0  | 83 | 17 | 0  | 0  | 0  | 0  | 0  | 3  | 0  | 0  | 27 | 0  | 28 | 5  | 0  | 0  | 33 | 0  | 0  | 0 | 0  | 39 |     |   |
|         | M02255_77_000000000-ADUT3_1_2111_10084_17965 T---AC--GT-AG-GGT-----GCG-A-G----C-G-T--T-GT-C-CGG-AA-----TT-A--T-T-GG-GC-----GT-A----AA-GG-GC-TC-----G-TA-G-G-C-G-----G--T-TT-G-T-C-----                               |    |     |    |    |    |    |    |    |    |    |    |    |    |    |    |    |    |    |    |    |    |    |   |    |    |     |   |
|         | -----GC---G-T-C-G-----G-G-A--G-TG--A-AA-AC--C-A-GG-T-G---CT-T-AA-----C-A-C-C-T-G-G--C-T---T-G--C-T---T-T-----C-GA-T-A--C-----G-G-G--CA--G-A-C---T-A-G-A-G-G-T--A-TG---CA-G-G-----G-G-A-G--AA-C-----GG-A--ATT---C-    |    |     |    |    |    |    |    |    |    |    |    |    |    |    |    |    |    |    |    |    |    |    |   |    |    |     |   |
|         | C-T-G-GT--GT-A-G-CG-GT--G---A-A-A---TG-C-GC-AG--AT-A-TC--A-G--G-A-G-G-A-AC-A-CC--GG--T-G--GC-GAA-G--G-C-G-----G-T-T-C-T---CTG-G--GC-A-T-----G-A--C-C-T--GA--CG-C-T-G--A-GG--A-G-CG-A--AA-G-T---G-TG--GG-             |    |     |    |    |    |    |    |    |    |    |    |    |    |    |    |    |    |    |    |    |    |    |   |    |    |     |   |
|         | G--AG-C-G-AA-----CA--GG Bacteria(100);Actinobacteria(100);Actinobacteria(100);Actinobacteridae(100);Actinomycetales(100);Propionibacterineae(100);Nocardiodaceae(100);Nocardioides(93);unclassified(93);             |    |     |    |    |    |    |    |    |    |    |    |    |    |    |    |    |    |    |    |    |    |    |   |    |    |     |   |
| Otu0122 | 0                                                                                                                                                                                                                    | 0  | 0   | 0  | 0  | 0  | 0  | 0  | 0  | 0  | 0  | 0  | 0  | 0  | 0  | 0  | 0  | 0  | 0  | 0  | 0  | 0  | 0  | 0 | 0  | 0  | 0   |   |
|         | 0                                                                                                                                                                                                                    | 0  | 0   | 0  | 0  | 19 | 0  | 42 | 0  | 0  | 0  | 0  | 0  | 0  | 0  | 0  | 0  | 0  | 0  | 0  | 0  | 0  | 61 | 0 | 0  | 0  | 0   |   |
|         | 0                                                                                                                                                                                                                    | 0  | 0   | 0  | 0  | 0  | 0  | 0  | 0  | 0  | 0  | 0  | 0  | 0  | 0  | 26 | 63 | 0  | 0  | 0  | 0  | 4  | 0  | 0 | 0  | 0  | 0   |   |
|         | 13                                                                                                                                                                                                                   | 0  | 37  | 0  | 54 | 0  | 0  | 0  | 0  | 0  | 0  | 0  | 0  | 0  | 0  | 0  | 0  | 0  | 0  | 0  | 0  | 0  | 0  | 0 | 0  | 0  |     |   |
|         | M02255_77_000000000-ADUT3_1_2103_20499_11907 T---AC--GA-AG-GGG-----GCT-A-G----C-G-T--T-GC-T-CGG-AA-----TC-A--C-T-GG-GC-----GT-A----AA-GC-GC-AC-----G-TA-G-G-C-G-----G--A-CT-C-T-T-----                               |    |     |    |    |    |    |    |    |    |    |    |    |    |    |    |    |    |    |    |    |    |    |   |    |    |     |   |
|         | -----AA---G-T-C-G-----G-G-G--G-TG--A-AA-TC--C-T-GG-A-G----CT-C-AA-----C-T-C-C-A-G-A--A-C---T-G--C-C---T-T-----C-GA-T-A--C-----T-G-G--GA--G-T-CT--T-C-G-A-G-T-T--C-GG---GA-G-A-----G-G-T-G--AG-T-----GG-A--ACT---     |    |     |    |    |    |    |    |    |    |    |    |    |    |    |    |    |    |    |    |    |    |    |   |    |    |     |   |
|         | G-C-G-A-GT--GT-A-G-AG-GT--G---A-A-A---TT-C-GT-AG--AT-A-TT--C-G--C-A-A-G-A-AC-A-CC--AG--T-G--GC-GAA-G--G-C-G-----G-C-T-C-A---CTG-G--CC-C-G-----A-T--A-C-T--GA--CG-C-T-G--A-GG--T-G-CG-A--AA-G-C---G-TG--GG-           |    |     |    |    |    |    |    |    |    |    |    |    |    |    |    |    |    |    |    |    |    |    |   |    |    |     |   |
|         | G--AG-C-A-AA-----CA--GG Bacteria(100);Proteobacteria(100);Alphaproteobacteria(100);Rhizobiales(100);unclassified(100);unclassified(100);unclassified(100);unclassified(100);unclassified(100);                       |    |     |    |    |    |    |    |    |    |    |    |    |    |    |    |    |    |    |    |    |    |    |   |    |    |     |   |
| Otu0123 | 0                                                                                                                                                                                                                    | 0  | 0   | 0  | 1  | 3  | 0  | 0  | 0  | 0  | 1  | 7  | 10 | 3  | 5  | 4  | 9  | 2  | 0  | 1  | 6  | 5  | 0  | 2 | 0  | 0  | 1   | 0 |
|         | 0                                                                                                                                                                                                                    | 0  | 0   | 1  | 0  | 0  | 0  | 0  | 0  | 0  | 0  | 1  | 0  | 0  | 4  | 0  | 0  | 25 | 1  | 0  | 1  | 34 | 0  | 7 | 20 | 1  | 18  | 0 |
|         | 1                                                                                                                                                                                                                    | 0  | 5   | 12 | 0  | 1  | 12 | 1  | 0  | 15 | 3  | 0  | 3  | 9  | 0  | 0  | 0  | 0  | 0  | 0  | 0  | 0  | 0  | 0 | 0  | 0  | 0   | 0 |
|         | 0                                                                                                                                                                                                                    | 0  | 0   | 0  | 0  |    |    |    |    |    |    |    |    |    |    |    |    |    |    |    |    |    |    |   |    |    |     |   |



Otu0125 0 0 0 0 18 0 0 0 0 0 0 0 0 0 0 0 0 0 6 0 0 4 0 0 0 0 0 0  
0 0 0 0 0 0 0 0 0 0 0 0 0 0 21 0 14 0 0 0 92 0 0 0 0 0 0 0 0  
0 0 0 0 0 0 0 0 0 0 0 0 0 0 0 0 20 0 0 0 0 0 0 0 0 0 0 0 27  
0 0 56 0 0 0 0 0 0 0 0 0 0 0 0 0 0 0 0 0 0 50 0 0 0 0 0  
M02255\_77\_000000000-ADUT3\_1\_1116\_5303\_18489 T---AC---GT-AG-GTG-----GCA-A-G-----C--G--T---T--GT-C-CGG-AT-----TT-A--C-T--GG-GT-----GT--A-----AA-GG-GC-GT-----G-TA-G-G-C-G-----G--A-GA-T-G-C-----  
AA---G-T-T-G-----G-G-A--G--TG--A-AA-TC--C-C-GG-G-G-----CT-C-AA-----C-C-C-C-G-G-A--A-C---T-G--C-T---T--T-----C-AA-A-A--C-----T--G-T--AT--C-C-C---T-T-G-A-G-T--G---T-CG-----GA-G-A-----G-G-C-A--AG-C-----GG--A--ATT---C-C-T-  
A-GT--GT-A-G-CG-GT--G---A--A--TG-C-GT-AG--AT-A-TT--A-G--G-A-G-G-A-AC-A-CC--AG--T--G--GC-GAA-G--G-C-G-----G--C-T-T-G---CTG--G--AC-G-A-----T-A--A-C-T--GA--CG-C-T-G--A-GG--C-G-CG-A--AA-G-C---G-TG--GG-G--  
AG-C-A-AA-----CA--GG Bacteria(100);Firmicutes(88);Clostridia(70);Clostridiales(70);unclassified(63);unclassified(63);unclassified(63);unclassified(63);unclassified(63);

Otu0126 0 0 0 0 0 0 0 0 0 0 0 0 0 0 0 0 0 0 0 19 59 7 0 7 8 0 4 0  
12 0 3 0 0 0 0 0 0 212 9 0 0 0 0 0 0 0 0 0 0 0 10 0 0 0 0 0 0  
0 0 0 0 0 0 0 0 0 0 0 0 0 0 181 53 0 0 0 0 0 0 0 1 0 0 0 0  
140 83 0 0 0 25 0 0 0 0 0 0 0 0 0 0 0 0 0 51 0 0 0 0 0 0 0  
M02255\_77\_000000000-ADUT3\_1\_1105\_7393\_16762 T---AC---GG-AG-GAT-----GCA-A-G-----C--G--T---T--AT-C-CGG-AA-----TG-A--T-T--GG-GC-----GT--A-----AA-GC-GT-CC-----G-CA-G-G-T-G-----G--C-AT-A-T-C-----AA-  
---G-T-T-T-----G-C-G--G--TT--A-AA-GG--T-T-CT-G-G-----CT-C-AA-----C-C-A-G-A-G-A--C-A---G-G--C-C--G--T-----G-AA-A-A--C-----T--G-A--TA--A-G-C---T-A-G-A-G-T-A--T-GG-----TA-G-G-----G-G-C-A--GA-G-----GG--A--ATT---C-C-C-A-  
GT--GT-A-G-CG-GT--G---A--A--TG-C-GT-AG--AG-A-TT--G-G--G-A-A-G-A-AC-A-CC--GG--T--G--GC-GAA-A--G-C-G-----C--T-C-T-G---CTA--G--GC-C-A-----A-A--A-C-T--GA--CA-C-T-G--A-GG--G-A-CG-A--AA-G-C---T-AG--GG-G--AG-  
C-G-AA-----TG--GG Bacteria(100);Cyanobacteria(100);unclassified(100);unclassified(100);unclassified(100);unclassified(100);unclassified(100);unclassified(100);unclassified(100);

Otu0127 0 0 0 92 0 31 0 0 0 0 63 0 0 0 0 0 0 0 2 0 0 0 14 1 0 0 0 0 0  
0 0 0 0 0 0 18 0 0 0 0 0 0 0 0 90 30 0 0 0 0 0 0 0 0 1 0 0 0  
0 0 12 0 0 0 0 0 0 0 6 0 0 0 0 71 119 0 51 0 0 76 0 4 0 0 0 0 0  
45 30 0 25 0 0 0 0 0 0 0 0 0 0 0 0 0 0 35 32 23 1 0 49 0 11 0 179  
M02255\_77\_000000000-ADUT3\_1\_1112\_7010\_18942 T---AC---GT-AG-GGG-----GCA-A-G-----C--G--T---T--AT-C-CGG-AT-----TT-A--C-T--GG-GT-----GT--A-----AA-GG-GA-GC-----G-CA-G-G-C-G-----G--T-TT-T-G-C-----AA-  
---G-T-T-G-----A-G-A--G--TG--G-AA-GC--A-G-GG-G-G-----CT-C-AA-----C-C-C-C-C-T-G--A-C---T-G--C-T---C--C-----C-AA-A-A--C-----T--G-T--AA--A-A-C---T-T-G-A-G-T-A--T-GG-----GA-G-A-----G-G-C-A--GG-C-----GG--A--ATT---C-C-T-A-  
GT--GT-A-G-CG-GT--G---A--A--TG-C-TT-AG--AT-A-TT--A-G--G-A-A-G-A-AC-A-CC--GG--T--G--GC-GAA-G--G-C-G-----G--C-C-T-G---CTG--G--AC-C-A-----A-A--A-C-T--GA--CG-C-T-G--A-GG--C-T-CG-A--AA-G-C---G-TG--GG-T--AG-C-  
A-AA-----CA--GG Bacteria(100);Firmicutes(100);Clostridia(100);Clostridiales(100);Lachnospiraceae(100);Catonella(100);unclassified(100);unclassified(100);unclassified(100);

Otu0128 0 0 0 0 0 0 0 0 0 0 18 0 0 0 0 0 0 0 3 7 0 0 0 0 27 0 0 0 0 11  
0 0 73 0 0 0 0 0 0 0 0 0 0 49 53 0 0 0 0 99 0 0 0 0 13 12 0 0 0  
75 0 2 0 0 0 0 0 0 0 0 0 0 0 0 0 0 7 0 0 0 0 0 0 0 0 0 0  
0 0 0 0 129 0 0 0 0 180 0 0 0 0 0 0 34 0 55 0 0 0 0 0 7 0 0  
M02255\_77\_000000000-ADUT3\_1\_1114\_13261\_10593 T---AC---GA-AG-GGG-----GCT-A-G-----C--G--T---T--GC-T-CGG-AA-----TC-A--C-T--GG-GC-----GT--A-----AA-GG-GC-GC-----G-TA-G-G-C-G-----G--C-CA-T-T-C-----  
-----AA---G-T-C-G-----G-G-G--G--TG--A-AA-GC--C-T-GT-G-G-----CT-C-AA-----C-C-A-C-A-G-A--A-T---T-G--C-C---T--T-----C-GA-T-A--C-----T--G-T--TT--G-G-C---T-T-G-A-G-A--C---C-GG-----AA-G-A-----G-G-T-A--AG-T-----GG--A--ACT---  
G-C-G-A-GT--GT-A-G-AG-GT--G---A--A--TT-C-GT-AG--AT-A-TT--C-G--C-A-A-G-A-AC-A-CC--AG--T--G--GC-GAA-G--G-C-G-----G--C-T-T-A---CTG--G--TC-C-G-----G-T---T-C-T--GA--CG-C-T-G--A-GG--C-G-CG-A--AA-G-C---G-TG--GG-  
G--AG-C-A-AA-----CA--GG Bacteria(100);Proteobacteria(100);Alphaproteobacteria(100);Rhizobiales(100);unclassified(100);unclassified(100);unclassified(100);unclassified(100);unclassified(100);

Otu0129 0 0 0 0 0 1 0 0 0 0 0 0 0 5 0 0 0 2 0 0 10 39 4 35 13 0 0 0 1  
3 4 133 245 0 0 0 31 0 198 85 189 21 0 0 109 458 1 3 0 0 0 133 0 3 0 27 0  
0 139 4 7 0 2 0 14 0 8 20 67 8 0 112 10 0 0 398 1377 580 0 1 130 0 0 671 0 178  
98 119 0 36 439 73 19 49 0 629 0 510 26 0 1 34 116 0 0 0 0 1 132 0 0 0 0  
M02255\_77\_000000000-ADUT3\_1\_1101\_5978\_19960 T---AC---GT-AA-GGG-----GCG-A-G-----C--G--T---T--GT-C-CGG-AA-----TT-A--T-T--GG-GC-----GT--A-----AA-GA-GT-GC-----G-TA-G-G-C-G-----G--C-AA-A-T-T-----  
AA---G-T-C-A-----G-A-T--G--TG--A-AA-AC--T-A-AG-G-G-----CT-C-AAC-----C-C-A-T-A-G-A--T-----T-G--C-A---T--C-----T--GA-A-A--C-----T--G-A--TA--T-G-C---T-T-G-A-G-T--C---A-AG-----GA-G-A-----G-G-A-A--AG-T-----GG--A--ATT---C-C-T-  
A-GT--GT-A-G-CG-GT--G---G--A--TG-C-GT-AG--AT-A-TT--A-G--G-A-G-G-A-AT-A-CC--GG--T--G--GC-GAA-G--G-C-G-----A--C-T-T-T---CTG--G--AC-T-T-----G-A--A-C-T--GA--CG-C-T-G--A-GG--C-A-CG-A--AA-G-C---G-TG--GG-G--  
AG-C-A-AA-----CA--GG Bacteria(100);Firmicutes(100);Clostridia(100);unclassified(99);unclassified(99);unclassified(99);unclassified(99);unclassified(99);unclassified(99);



|                                                                                                                                                                                                                    |    |   |    |    |    |    |    |   |    |    |    |   |    |     |     |    |    |   |     |     |    |    |   |     |    |   |    |   |
|--------------------------------------------------------------------------------------------------------------------------------------------------------------------------------------------------------------------|----|---|----|----|----|----|----|---|----|----|----|---|----|-----|-----|----|----|---|-----|-----|----|----|---|-----|----|---|----|---|
| Otu0130                                                                                                                                                                                                            | 0  | 0 | 0  | 0  | 0  | 0  | 0  | 0 | 0  | 0  | 0  | 7 | 0  | 0   | 0   | 2  | 0  | 6 | 3   | 4   | 0  | 1  | 0 | 3   | 0  | 0 | 0  | 0 |
|                                                                                                                                                                                                                    | 0  | 0 | 0  | 0  | 0  | 0  | 0  | 0 | 0  | 0  | 0  | 0 | 0  | 0   | 0   | 0  | 0  | 0 | 0   | 0   | 21 | 0  | 0 | 0   | 0  | 0 | 0  |   |
|                                                                                                                                                                                                                    | 0  | 0 | 0  | 1  | 0  | 0  | 15 | 0 | 0  | 0  | 0  | 0 | 0  | 0   | 0   | 0  | 0  | 0 | 0   | 0   | 0  | 0  | 0 | 0   | 0  | 0 | 0  |   |
|                                                                                                                                                                                                                    | 0  | 0 | 0  | 0  | 0  | 0  | 0  | 0 | 0  | 10 | 0  | 0 | 0  | 0   | 0   | 0  | 0  | 0 | 0   | 0   | 0  | 0  | 0 | 0   | 0  | 0 | 0  |   |
| M02255_77_000000000-ADUT3_1_1109_28352_11553 T---GC---CA-GC-AGC-----CGC-G-G-----T--A-A--T--AC-G-GAG-GA-----TC-C-A-A-GC-GT-----TA--T----CC-GG-AA-TC-----A-TA-G-G-C-G-----G--T-TT-A-G-T-----                         |    |   |    |    |    |    |    |   |    |    |    |   |    |     |     |    |    |   |     |     |    |    |   |     |    |   |    |   |
| ----AA----G-T-C-A-----G-T-G--G--TG--A-AA-GC--C-C-AT-C-G----CT-C-AA-----C-G-G-T-G-G-A-A-C---G-G--C-C--A-T-----T-GA-T-A--C-----T-G-C-TA--G-A-C---T-T-G-A-A-T-T--A-TT----AG-G-A-----A-G-T-A--AC-T-----AG--A-ATA---T-  |    |   |    |    |    |    |    |   |    |    |    |   |    |     |     |    |    |   |     |     |    |    |   |     |    |   |    |   |
| G-T-A-GT--GT-A-G-CG-GT--G---A-A-A---TG-C-TT-AG--AG-A-TT--A-C--A-T-G-G-A-AT-A-CC---AA--T--T--GC-GAA-G--G-C-A-----G-G-T-T-A--CTA-C--TA-A-T-----G-G--A-T-T-GA--CG-C-T-G--A-TG--G-A-CG-A-AA-G-C--G-TG--GG-T--          |    |   |    |    |    |    |    |   |    |    |    |   |    |     |     |    |    |   |     |     |    |    |   |     |    |   |    |   |
| AG-C-G-AA-----CA--GG Bacteria(100);Bacteroidetes(100);Flavobacteria(100);Flavobacteriales(100);Flavobacteriaceae(100);Flavobacterium(100);unclassified(100);unclassified(100);unclassified(100);                   |    |   |    |    |    |    |    |   |    |    |    |   |    |     |     |    |    |   |     |     |    |    |   |     |    |   |    |   |
| Otu0131                                                                                                                                                                                                            | 0  | 0 | 0  | 0  | 0  | 0  | 0  | 0 | 0  | 0  | 0  | 0 | 0  | 0   | 0   | 0  | 0  | 0 | 0   | 0   | 0  | 24 | 1 | 0   | 0  | 0 | 0  |   |
|                                                                                                                                                                                                                    | 0  | 0 | 0  | 0  | 0  | 0  | 96 | 0 | 0  | 0  | 0  | 0 | 0  | 0   | 0   | 0  | 0  | 0 | 117 | 0   | 0  | 0  | 0 | 0   | 0  | 0 | 0  |   |
|                                                                                                                                                                                                                    | 0  | 0 | 0  | 0  | 0  | 0  | 0  | 0 | 0  | 0  | 0  | 0 | 0  | 231 | 0   | 0  | 0  | 0 | 0   | 0   | 4  | 77 | 0 | 0   | 0  | 0 | 0  |   |
|                                                                                                                                                                                                                    | 0  | 0 | 58 | 0  | 0  | 0  | 0  | 0 | 0  | 0  | 0  | 0 | 0  | 0   | 32  | 0  | 0  | 0 | 0   | 0   | 0  | 0  | 9 | 0   | 0  | 0 | 0  |   |
| M02255_77_000000000-ADUT3_1_1117_5045_19079 T---AC--GA-AG-GGG-----GCG-A-G-----C-G--T---T--GC-T-CGG-AA-----TG-A-C-T--GG-GC-----GT--A----AA-GG-GC-GC-----G-TA-G-G-C-G-----G--A-CC-T-C-G-----                         |    |   |    |    |    |    |    |   |    |    |    |   |    |     |     |    |    |   |     |     |    |    |   |     |    |   |    |   |
| CA---G-T-C-G-----G-G-C--G--TG--A-AA-TC--C-C-CG-G-G----CT-C-AA-----C-C-C-G-G-G-A-C-G---T-G--C-G--C--C-----C-GA-G-A--C-----G--C-G--GG--G-T-C---T-G-G-A-G-T--G--G-GG---GA-G-A-----G-G-G-T--CG-C-----GG--A-ATT---C-C-  |    |   |    |    |    |    |    |   |    |    |    |   |    |     |     |    |    |   |     |     |    |    |   |     |    |   |    |   |
| C-A-GT--GT-A-G-AG-GT--G---A-A-A---TT-C-GT-AG--AT-A-TT--G-G--G-A-G-A-AC-A-CC--GG--T-G--GC-GAA-G--G-C-G-----G--C-G-A-C--CTG--G--CC-C-T-----T-G--A-C-T-GA--CG-C-T-G--A-GG--C-G-CG-A--CA-G-C--G-TG--GG-G--             |    |   |    |    |    |    |    |   |    |    |    |   |    |     |     |    |    |   |     |     |    |    |   |     |    |   |    |   |
| AG-C-A-AA-----CA--GG Bacteria(100);Proteobacteria(100);Alphaproteobacteria(100);Rhodospirillales(100);unclassified(100);unclassified(100);unclassified(100);unclassified(100);unclassified(100);                   |    |   |    |    |    |    |    |   |    |    |    |   |    |     |     |    |    |   |     |     |    |    |   |     |    |   |    |   |
| Otu0132                                                                                                                                                                                                            | 0  | 0 | 1  | 30 | 34 | 0  | 0  | 0 | 32 | 0  | 0  | 0 | 0  | 0   | 0   | 0  | 0  | 0 | 4   | 0   | 6  | 0  | 0 | 9   | 0  | 0 | 0  | 0 |
|                                                                                                                                                                                                                    | 0  | 0 | 0  | 0  | 20 | 0  | 0  | 0 | 0  | 0  | 1  | 0 | 8  | 8   | 0   | 0  | 0  | 0 | 0   | 0   | 0  | 20 | 0 | 29  | 0  | 0 | 0  |   |
|                                                                                                                                                                                                                    | 0  | 0 | 0  | 0  | 0  | 0  | 0  | 0 | 0  | 0  | 0  | 1 | 0  | 0   | 0   | 21 | 9  | 0 | 0   | 1   | 0  | 17 | 0 | 0   | 0  | 0 | 14 |   |
|                                                                                                                                                                                                                    | 0  | 6 | 0  | 0  | 0  | 0  | 0  | 0 | 0  | 0  | 0  | 0 | 0  | 0   | 0   | 0  | 3  | 0 | 0   | 0   | 9  | 0  | 0 | 0   | 0  | 0 | 0  |   |
| M02255_77_000000000-ADUT3_1_1111_5974_7595 T---AC--GT-AG-GGT-----GCA-A-G-----C-G--T---T--GT-C-CGG-AA-----TT-A-T-T--GG-GC-----GT--A----AA-GA-GC-TC-----G-TA-G-G-C-G-----G--T-CT-G-T-C-----GC-                       |    |   |    |    |    |    |    |   |    |    |    |   |    |     |     |    |    |   |     |     |    |    |   |     |    |   |    |   |
| ---G-T-C-G-----G-C-T--G--TG--A-AA-AC--T-C-GG-G-G----CT-C-AA-----C-C-C-C-G-A-G--C-C---T-G--C-A--G-T-----C-GA-T-A--C-----G--G-G--CA-G-A-C---T-A-G-A-G-T--G--C-TG---TA-G-G-----G-G-A-G--AC-T-----GG--A-ATT---C-C-T-G- |    |   |    |    |    |    |    |   |    |    |    |   |    |     |     |    |    |   |     |     |    |    |   |     |    |   |    |   |
| GT--GT-A-G-CG-GT--G---A-A-A---TG-C-GC-AG--AT-A-TC--A-G--G-A-G-G-A-AC-A-CC--GG--T-G--GC-GAA-G--G-C-G-----G--G-T-C-T--CTG--G--GC-A-G-----T-A--A-C-T-GA--CG-C-T-G--A-GG--A-G-CG-A-AA-G-C--G-TG--GG-G--AG-             |    |   |    |    |    |    |    |   |    |    |    |   |    |     |     |    |    |   |     |     |    |    |   |     |    |   |    |   |
| C-A-AA-----CA--GG Bacteria(100);Actinobacteria(100);Actinobacteria(100);Actinobacteridae(100);Actinomycetales(100);unclassified(100);unclassified(100);unclassified(100);unclassified(100);                        |    |   |    |    |    |    |    |   |    |    |    |   |    |     |     |    |    |   |     |     |    |    |   |     |    |   |    |   |
| Otu0133                                                                                                                                                                                                            | 0  | 0 | 0  | 0  | 0  | 0  | 0  | 0 | 0  | 0  | 0  | 0 | 0  | 0   | 0   | 0  | 0  | 0 | 0   | 0   | 0  | 0  | 0 | 0   | 0  | 0 | 0  |   |
|                                                                                                                                                                                                                    | 2  | 0 | 0  | 0  | 0  | 0  | 0  | 0 | 0  | 0  | 0  | 0 | 0  | 0   | 0   | 0  | 0  | 0 | 0   | 0   | 0  | 0  | 0 | 0   | 0  | 0 | 0  |   |
|                                                                                                                                                                                                                    | 0  | 0 | 14 | 0  | 0  | 0  | 0  | 0 | 0  | 0  | 0  | 0 | 0  | 165 | 206 | 0  | 0  | 0 | 0   | 111 | 0  | 0  | 0 | 0   | 0  | 0 | 56 |   |
|                                                                                                                                                                                                                    | 0  | 0 | 0  | 17 | 72 | 28 | 0  | 1 | 0  | 0  | 0  | 0 | 0  | 0   | 0   | 0  | 0  | 0 | 0   | 0   | 0  | 0  | 0 | 0   | 0  | 0 | 0  |   |
| M02255_77_000000000-ADUT3_1_1105_7777_22365 T---AC--GT-AG-GGG-----GCA-A-G-----C-G--T---T--AT-C-CGG-AA-----TT-A-C-T--GG-GC-----GT--A----AA-GG-GT-GC-----G-TA-G-G-C-G-----G--C-TA-G-T-T-----                         |    |   |    |    |    |    |    |   |    |    |    |   |    |     |     |    |    |   |     |     |    |    |   |     |    |   |    |   |
| AA---G-T-C-G-----A-G-G--T--TA--A-AA-GG--C-A-GT-A-G----CT-C-AA-----C-T-A-C-T-G-T-T-----G-G--G-C--C--T-----T-GA-A-A--C-----T-A-A-TT--A-G-C---T-T-G-A-G-T-A--T-AG---GA-G-A-----G-G-A-A--AG-T-----GG--A-ATT---C-C-C-   |    |   |    |    |    |    |    |   |    |    |    |   |    |     |     |    |    |   |     |     |    |    |   |     |    |   |    |   |
| G-GT--GT-A-G-CG-GT--G---A-A-A---TG-C-GT-AG--AT-A-TC--G-G--G-A-G-G-A-AT-A-CC--GG--T-G--GC-GAA-G--G-C-G-----A-C-T-T-T--CTG--G--AC-T-A-----T-A--A-C-T-GA--CG-C-T-G--A-GG--C-A-CG-A-AA-G-C--G-TG--GG-T--               |    |   |    |    |    |    |    |   |    |    |    |   |    |     |     |    |    |   |     |     |    |    |   |     |    |   |    |   |
| AG-C-A-AA-----CA--GG Bacteria(100);Firmicutes(100);Clostridia(100);Clostridiales(100);Peptostreptococcaceae(100);Incertae_Sedis(100);unclassified(100);unclassified(100);unclassified(100);                        |    |   |    |    |    |    |    |   |    |    |    |   |    |     |     |    |    |   |     |     |    |    |   |     |    |   |    |   |
| Otu0134                                                                                                                                                                                                            | 0  | 0 | 0  | 0  | 0  | 29 | 0  | 0 | 0  | 16 | 20 | 0 | 0  | 8   | 11  | 0  | 0  | 0 | 0   | 0   | 1  | 50 | 0 | 161 | 86 | 1 | 20 |   |
|                                                                                                                                                                                                                    | 0  | 5 | 0  | 1  | 0  | 0  | 0  | 0 | 14 | 8  | 0  | 0 | 50 | 0   | 0   | 0  | 31 | 0 | 0   | 8   | 0  | 7  | 0 | 0   | 0  | 0 | 7  |   |
|                                                                                                                                                                                                                    | 0  | 0 | 0  | 0  | 0  | 0  | 0  | 0 | 0  | 0  | 0  | 0 | 0  | 0   | 0   | 0  | 0  | 0 | 0   | 5   | 19 | 0  | 0 | 4   | 0  | 0 | 0  |   |
|                                                                                                                                                                                                                    | 26 | 0 | 0  | 0  | 1  | 0  | 0  | 0 | 0  | 0  | 0  | 0 | 0  | 0   | 0   | 0  | 0  | 0 | 15  | 13  | 0  | 0  | 0 | 6   | 0  | 0 | 0  |   |
| M02255_77_000000000-ADUT3_1_1105_11189_4306 C---TA--AC-TC-CGT-----GCC-A-G-----C---A--G--CC-G-CGG-TA-----AT-A-C-G--GA-GG-----GTG-C---GA-GCGTT-AA-----T-CG-G-A-A-T-----T--A-CT-G-T-T-----AA-                         |    |   |    |    |    |    |    |   |    |    |    |   |    |     |     |    |    |   |     |     |    |    |   |     |    |   |    |   |
| ---G-C-A-A-----G-A-T--G--TG--A-AA-GC--C-C-GG-G-G----CT-C-AA-----C-C-T-C-G-G-A-A-C---A-G--C-A--T-T-----T--TG-A-A--C-----T-G-G--CA-G-A-C---T-A-G-A-G-T-C---T-TG---TA-G-A-----G-G-G-G--GG-T-----AG--A-ATT---T-C-A-G-  |    |   |    |    |    |    |    |   |    |    |    |   |    |     |     |    |    |   |     |     |    |    |   |     |    |   |    |   |
| GT--GT-A-G-CG-GT--G---A-A-A---TG-C-GT-AG--AG-A-TC--T-G--A-A-G-G-A-AT-A-CC--GG--T-G--GC-GAA-G--G-C-G-----G--C-C-C-C--CTG--G--AC-A-A-----A-G--A-C-T-GA--CG-C-T-C--A-GA--T-G-CG-A-AA-G-C--G-TG--GG-G--AG-             |    |   |    |    |    |    |    |   |    |    |    |   |    |     |     |    |    |   |     |     |    |    |   |     |    |   |    |   |
| C-A-AA-----CA--GG Bacteria(100);Proteobacteria(100);Gammaproteobacteria(100);Vibrionales(100);Vibrionaceae(100);Photobacterium(99);unclassified(99);unclassified(99);unclassified(99);                             |    |   |    |    |    |    |    |   |    |    |    |   |    |     |     |    |    |   |     |     |    |    |   |     |    |   |    |   |



|                                                                                                                                                                                                                                                                                                                                                                                                                                                                                                                                                                                                                                                                                                                                                                                                                       |   |    |    |     |     |    |    |     |   |    |     |   |   |     |     |    |     |   |    |    |    |   |    |     |   |    |    |     |
|-----------------------------------------------------------------------------------------------------------------------------------------------------------------------------------------------------------------------------------------------------------------------------------------------------------------------------------------------------------------------------------------------------------------------------------------------------------------------------------------------------------------------------------------------------------------------------------------------------------------------------------------------------------------------------------------------------------------------------------------------------------------------------------------------------------------------|---|----|----|-----|-----|----|----|-----|---|----|-----|---|---|-----|-----|----|-----|---|----|----|----|---|----|-----|---|----|----|-----|
| Otu0135                                                                                                                                                                                                                                                                                                                                                                                                                                                                                                                                                                                                                                                                                                                                                                                                               | 0 | 0  | 0  | 0   | 0   | 71 | 0  | 0   | 0 | 0  | 0   | 0 | 0 | 0   | 0   | 0  | 0   | 0 | 0  | 0  | 12 | 4 | 0  | 0   | 0 | 0  | 3  |     |
|                                                                                                                                                                                                                                                                                                                                                                                                                                                                                                                                                                                                                                                                                                                                                                                                                       | 0 | 27 | 3  | 0   | 0   | 82 | 40 | 67  | 0 | 69 | 31  | 0 | 0 | 0   | 54  | 0  | 0   | 0 | 0  | 0  | 0  | 0 | 0  | 0   | 0 | 0  | 0  |     |
|                                                                                                                                                                                                                                                                                                                                                                                                                                                                                                                                                                                                                                                                                                                                                                                                                       | 0 | 0  | 0  | 0   | 0   | 0  | 0  | 0   | 0 | 0  | 0   | 0 | 0 | 0   | 0   | 0  | 253 | 0 | 0  | 0  | 0  | 0 | 0  | 0   | 0 | 0  | 0  |     |
|                                                                                                                                                                                                                                                                                                                                                                                                                                                                                                                                                                                                                                                                                                                                                                                                                       | 0 | 0  | 0  | 0   | 0   | 0  | 0  | 0   | 0 | 0  | 0   | 0 | 0 | 0   | 13  | 0  | 0   | 0 | 37 | 0  | 0  | 0 | 0  | 0   | 0 | 0  | 0  |     |
| M02255_77_000000000-ADUT3_1_2112_15249_18248 T---AC---GA-AG-GGG-----GCT-A-G-----C-G-T---T-GT-T-CGG-AA-----TT-A--C-T-GG-GC-----GT--A----AA-GC-GC-AC-----G-TA-G-G-C-G-----G--A-TT-T-G-T-----AA---G-T-C-A-----G-G-G-G--TG--A-AA-TC--C-C-GG-G-G----CT-C-AA-----C-C-T-C-G-G-A--A-C---T-G--C-C---T-T-----T--GA-T-A--C-----T--G-C--AA-G-T-C---T-C-G-A-G-T--C---C-GG----AA-G-A-----G-G-T-G--AG-T-----GG--A--ATT---C-C-T-A-GT--GT-A-G-AG-GT--G---A-A-A---TT-C-GT-AG--AT-A-TT--A-G--G-A-A-G-A-AC-A-CC---AG--T--G--GC-GAA-G-G-C-G-----G--C-T-C-A---CTG--G--TC-C-G-----G-T--A-C-T--GA--CG-C-T-G--A-GG--T-G-CG-A--AA-G-C---G-TG--GG-G--AG-C-A-AA-----CA--GG Bacteria(100);Proteobacteria(100);Alphaproteobacteria(100);Rhizobiales(100);Rhodobiaceae(78);Rhodobium(78);unclassified(78);unclassified(78);unclassified(78);         |   |    |    |     |     |    |    |     |   |    |     |   |   |     |     |    |     |   |    |    |    |   |    |     |   |    |    |     |
| Otu0136                                                                                                                                                                                                                                                                                                                                                                                                                                                                                                                                                                                                                                                                                                                                                                                                               | 0 | 0  | 0  | 0   | 108 | 0  | 21 | 2   | 0 | 0  | 0   | 0 | 0 | 0   | 0   | 0  | 0   | 0 | 0  | 0  | 0  | 0 | 81 | 3   | 0 | 6  | 4  | 0   |
|                                                                                                                                                                                                                                                                                                                                                                                                                                                                                                                                                                                                                                                                                                                                                                                                                       | 0 | 0  | 0  | 135 | 0   | 0  | 20 | 108 | 0 | 0  | 0   | 0 | 0 | 134 | 356 | 33 | 0   | 0 | 2  | 0  | 0  | 0 | 32 | 105 | 0 | 0  | 0  | 714 |
|                                                                                                                                                                                                                                                                                                                                                                                                                                                                                                                                                                                                                                                                                                                                                                                                                       | 0 | 0  | 0  | 0   | 0   | 0  | 0  | 0   | 6 | 0  | 0   | 0 | 0 | 0   | 0   | 0  | 0   | 0 | 0  | 0  | 0  | 0 | 56 | 0   | 0 | 0  | 19 |     |
|                                                                                                                                                                                                                                                                                                                                                                                                                                                                                                                                                                                                                                                                                                                                                                                                                       | 0 | 0  | 0  | 178 | 46  | 0  | 0  | 0   | 0 | 5  | 43  | 0 | 0 | 0   | 0   | 0  | 0   | 0 | 0  | 0  | 45 | 0 | 1  | 55  | 0 | 0  | 0  |     |
| M02255_77_000000000-ADUT3_1_2105_24365_12548 T---AC---GA-AG-GGG-----GCT-A-G-----C-G-T---T-GT-T-CGG-AA-----TT-A--C-T-GG-GC-----GT--A----AA-GC-GC-AC-----G-TA-G-G-C-G-----G--A-TA-T-T-T-----AA---G-T-C-A-----G-G-G-G--TG--A-AA-TC--C-C-GC-A-G----CT-C-AA-----C-T-G-C-G-G-A--A-C---T-G--C-C---T-T-----T--GA-T-A--C-----T--G-G--GT--A-T-C---T-T-G-A-G-T--A--T-GG----AA-G-A-----G-G-T-A--AG-T-----GG--A--ATT---C-C-G-A-GT--GT-A-G-AG-GT--G---A-A-A---TT-C-GT-AG--AT-A-TT--C-G--G-A-G-G-A-AC-A-CC---AG--T--G--GC-GAA-G-G-C-G-----G--C-T-T-A---CTG--G--TC-C-A-----T-T--A-C-T--GA--CG-C-T-G--A-GG--T-G-CG-A--AA-G-C---G-TG--GG-G--AG-C-A-AA-----CA--GG Bacteria(100);Proteobacteria(100);Alphaproteobacteria(100);Rhizobiales(100);unclassified(100);unclassified(100);unclassified(100);unclassified(100);unclassified(100); |   |    |    |     |     |    |    |     |   |    |     |   |   |     |     |    |     |   |    |    |    |   |    |     |   |    |    |     |
| Otu0137                                                                                                                                                                                                                                                                                                                                                                                                                                                                                                                                                                                                                                                                                                                                                                                                               | 0 | 0  | 0  | 0   | 0   | 0  | 0  | 0   | 0 | 0  | 318 | 0 | 0 | 0   | 0   | 18 | 0   | 0 | 0  | 0  | 0  | 1 | 0  | 0   | 0 | 0  | 0  | 0   |
|                                                                                                                                                                                                                                                                                                                                                                                                                                                                                                                                                                                                                                                                                                                                                                                                                       | 0 | 0  | 0  | 0   | 0   | 0  | 0  | 0   | 0 | 0  | 1   | 0 | 0 | 0   | 0   | 0  | 3   | 0 | 0  | 1  | 0  | 0 | 0  | 0   | 0 | 0  | 0  |     |
|                                                                                                                                                                                                                                                                                                                                                                                                                                                                                                                                                                                                                                                                                                                                                                                                                       | 0 | 1  | 0  | 0   | 0   | 1  | 0  | 0   | 0 | 0  | 0   | 0 | 0 | 0   | 0   | 0  | 0   | 0 | 0  | 0  | 0  | 0 | 0  | 0   | 0 | 0  | 0  |     |
|                                                                                                                                                                                                                                                                                                                                                                                                                                                                                                                                                                                                                                                                                                                                                                                                                       | 0 | 0  | 0  | 0   | 0   | 0  | 0  | 1   | 0 | 0  | 0   | 0 | 0 | 0   | 0   | 0  | 0   | 0 | 0  | 0  | 0  | 0 | 0  | 0   | 0 | 0  | 0  |     |
| M02255_76_000000000-ADUNE_1_2104_7077_17345 .....AC---T-AC-GT-----GCC-A-G-----C-A-G---C-CG-C-GGT-AA-----TA-C--G-T-AG-GT-----GG--C----AA-GC-G--TT-----G-TC-C-G--G-----A-T-CT-C-T-T-----AA---G-T-C-T-----G-A-T--G--TG--A-AA-GC--C-C-CC-G-G----CT-C-AA-----C-C-G-G-G-G-A--G-----G-GT-C-A--T-T-----G--GA-A-A--C-----T--G-G--GG--G-A-C---T-T-G-A-G-G-A--C-AG----AA-G-A-----G-G-A-G--AG-T-----GG--A--ATT---C-C-A-A-GT--GT-A-G-CG-GT--G---A-A-A---TG-C-GT-AG--AT-A-TT--T-G--G-A-G-G-A-AC-A-CC---AG--T--G--GC-GAA-G-G-C-G-----G--C-T-C-T---CTG--G--TC-T-G-----T-T--A-C-T--GA--CG-C-T-G--A-GG--C-G-CG-A--AA-G-C---G-TG--GG-G--AG-C-A-AA-----CA--GG Bacteria(100);Firmicutes(100);Bacilli(100);Bacillales(65);unclassified(65);unclassified(65);unclassified(65);unclassified(65);unclassified(65);                             |   |    |    |     |     |    |    |     |   |    |     |   |   |     |     |    |     |   |    |    |    |   |    |     |   |    |    |     |
| Otu0138                                                                                                                                                                                                                                                                                                                                                                                                                                                                                                                                                                                                                                                                                                                                                                                                               | 0 | 0  | 9  | 11  | 0   | 10 | 0  | 8   | 7 | 0  | 0   | 0 | 0 | 0   | 2   | 0  | 0   | 0 | 0  | 0  | 0  | 0 | 0  | 1   | 0 | 0  | 1  | 3   |
|                                                                                                                                                                                                                                                                                                                                                                                                                                                                                                                                                                                                                                                                                                                                                                                                                       | 0 | 0  | 0  | 7   | 5   | 8  | 11 | 0   | 4 | 9  | 2   | 0 | 0 | 6   | 8   | 2  | 2   | 0 | 3  | 18 | 0  | 0 | 7  | 0   | 1 | 0  | 2  | 14  |
|                                                                                                                                                                                                                                                                                                                                                                                                                                                                                                                                                                                                                                                                                                                                                                                                                       | 0 | 71 | 2  | 1   | 3   | 0  | 5  | 0   | 3 | 0  | 0   | 3 | 0 | 0   | 0   | 1  | 0   | 3 | 6  | 0  | 1  | 0 | 13 | 0   | 0 | 2  | 4  | 23  |
|                                                                                                                                                                                                                                                                                                                                                                                                                                                                                                                                                                                                                                                                                                                                                                                                                       | 9 | 24 | 26 | 19  | 34  | 13 | 0  | 0   | 1 | 0  | 1   | 0 | 3 | 0   | 0   | 1  | 14  | 0 | 16 | 17 | 9  | 6 | 0  | 5   | 0 | 36 | 0  |     |
| M02255_76_000000000-ADUNE_1_1105_21904_6884 .....AC---T-AC-GT-----GCC-A-G-----C-A-G---C-CG-C-GGT-AA-----TA-C--G-T-AG-GT-----GG--C----AA-GC-G--TT-----G---T-C-C-G-----G--A-TC-G-G-T-----CA---G-T-C-T-----G-T-C--T--TA--A-AA-GT--T-C-GG-G-G----CT-T-AA-----C-C-C-C-G-T-G--A-----T-G--G-G--A-T-----G--GA-A-A--C-----T--G-C-CA-A-T-C---T-A-G-A-G-T--A--T-CG----GA-G-A-----G-G-A-A--AG-T-----GG--A--ATT---C-C-T-A-GT--GT-A-G-CG-GT--G---A-A-A---TG-C-GT-AG--AT-A-TT--A-G--G-A-A-G-A-AC-A-CC---AG--T--G--GC-GAA-G-G-C-G-----A-C-T-T-T---CTG--G--AC-G-A-----A-A--A-C-T--GA--CG-C-T-G--A-GG--C-G-CG-A--AA-G-C---C-AG--GG-G--AG-C-G-AA-----CG--GG Bacteria(100);Firmicutes(100);Clostridia(100);Clostridiales(100);Veillonellaceae(100);Veillonella(100);unclassified(100);unclassified(100);unclassified(100);                |   |    |    |     |     |    |    |     |   |    |     |   |   |     |     |    |     |   |    |    |    |   |    |     |   |    |    |     |
| Otu0139                                                                                                                                                                                                                                                                                                                                                                                                                                                                                                                                                                                                                                                                                                                                                                                                               | 0 | 0  | 0  | 0   | 0   | 0  | 0  | 0   | 0 | 0  | 0   | 0 | 0 | 0   | 0   | 0  | 0   | 0 | 0  | 0  | 0  | 0 | 0  | 0   | 0 | 0  | 0  | 1   |
|                                                                                                                                                                                                                                                                                                                                                                                                                                                                                                                                                                                                                                                                                                                                                                                                                       | 0 | 0  | 0  | 2   | 0   | 0  | 0  | 0   | 4 | 7  | 1   | 3 | 0 | 0   | 45  | 20 | 40  | 0 | 0  | 0  | 0  | 0 | 0  | 0   | 0 | 0  | 0  | 0   |
|                                                                                                                                                                                                                                                                                                                                                                                                                                                                                                                                                                                                                                                                                                                                                                                                                       | 0 | 0  | 0  | 0   | 0   | 0  | 0  | 0   | 0 | 0  | 0   | 0 | 0 | 48  | 59  | 0  | 0   | 0 | 0  | 0  | 0  | 0 | 0  | 0   | 0 | 0  | 15 | 0   |
|                                                                                                                                                                                                                                                                                                                                                                                                                                                                                                                                                                                                                                                                                                                                                                                                                       | 5 | 53 | 32 | 0   | 0   | 0  | 0  | 0   | 0 | 0  | 0   | 0 | 0 | 0   | 0   | 0  | 0   | 7 | 0  | 0  | 0  | 0 | 0  | 0   | 0 | 0  | 0  |     |
| M02255_77_000000000-ADUT3_1_1106_23356_17953 T---AC---GT-AG-GGG-----GCA-A-G-----C-G-T---T--AT-C-CGG-AT-----TT-A--C-T-GG-GT-----GT--A----AA-GG-GA-GC-----G-TA-G-A-C-G-----G--C-AT-A-T-A-----AA---G-T-C-T-----G-A-A--G--TG--A-AA-AC--C-C-GC-A-G----CT-C-AA-----C-T-G-C-G-G-A--G-T---T-G--C-T---T-T-----G--GA-A-A--C-----T--T-A-TA-A-G-C---T-G-G-A-G-T--G---T-CG----GA-G-G-----G-G-T-A--AG-C-----GG--A--ATT---C-C-C-A-GT--GT-A-G-CG-GT--G---A-A-A---TG-C-GT-AG--AT-A-TT--G-G--G-A-G-G-A-AC-A-CC---GG--A--G--GC-GAA-G-G-C-G-----G--C-T-T-A---CTG--G--AA-G-A-----T-A--A-C-T--GA--CG-T-T-G--A-GG--C-T-CG-A--AG-G-C---G-TG--GG-T--AG-C-A-AA-----CA--GG Bacteria(100);Firmicutes(100);Clostridia(95);Clostridiales(95);Lachnospiraceae(79);unclassified(79);unclassified(79);unclassified(79);unclassified(79);               |   |    |    |     |     |    |    |     |   |    |     |   |   |     |     |    |     |   |    |    |    |   |    |     |   |    |    |     |



|                                                                                                                                                                                                                           |    |    |     |     |     |     |     |     |    |      |    |     |    |    |     |     |     |     |     |     |    |     |     |     |    |   |    |     |   |
|---------------------------------------------------------------------------------------------------------------------------------------------------------------------------------------------------------------------------|----|----|-----|-----|-----|-----|-----|-----|----|------|----|-----|----|----|-----|-----|-----|-----|-----|-----|----|-----|-----|-----|----|---|----|-----|---|
| Otu0140                                                                                                                                                                                                                   | 0  | 0  | 0   | 96  | 0   | 0   | 0   | 0   | 0  | 0    | 0  | 0   | 0  | 7  | 0   | 0   | 0   | 0   | 0   | 0   | 11 | 6   | 0   | 7   | 0  | 0 | 3  | 0   |   |
|                                                                                                                                                                                                                           | 0  | 0  | 0   | 0   | 0   | 0   | 0   | 0   | 0  | 0    | 0  | 0   | 58 | 0  | 0   | 0   | 0   | 0   | 0   | 109 | 0  | 0   | 0   | 20  | 0  | 0 | 0  |     |   |
|                                                                                                                                                                                                                           | 0  | 0  | 0   | 0   | 0   | 0   | 0   | 0   | 0  | 0    | 0  | 0   | 0  | 0  | 4   | 22  | 0   | 0   | 0   | 0   | 0  | 0   | 0   | 123 | 0  | 0 | 18 | 92  |   |
|                                                                                                                                                                                                                           | 15 | 0  | 0   | 108 | 0   | 0   | 0   | 0   | 0  | 0    | 0  | 0   | 64 | 0  | 0   | 0   | 0   | 0   | 31  | 0   | 0  | 0   | 0   | 0   | 0  | 0 | 0  |     |   |
| M02255_77_000000000-ADUT3_1_1111_22214_19411                                                                                                                                                                              |    |    |     |     |     |     |     |     |    |      |    |     |    |    |     |     |     |     |     |     |    |     |     |     |    |   |    |     |   |
| T---AC---GA-AG-GGG-----GCT-A-G-----C-G--T---T--GT-T-CGG-AA-----TC-A--C-T--GG-GC-----GT-A----AA-GG-GT-GC-----G-TA-G-G-C-G-----G--A-TT-C-T-T-----                                                                           |    |    |     |     |     |     |     |     |    |      |    |     |    |    |     |     |     |     |     |     |    |     |     |     |    |   |    |     |   |
| -----AA---G-T-C-A-----G-G-G--G--TG--A-AA-TC--C-C-GA-G-G----CT-C-AA-----C-C-T-C-G-G-A--A-C---T-G--C-C---T-T-----T--GA-T-A--C-----T--G-G--GG--A-T-C---T-T-G-A-G-T--C---C-GG----AA-G-A-----G-G-T-G---AG-T-----GG--A--ACT---- |    |    |     |     |     |     |     |     |    |      |    |     |    |    |     |     |     |     |     |     |    |     |     |     |    |   |    |     |   |
| G-C-G-A-GT--GT-A-G-AG-GT--G---A--A-A---TT-C-GT-AG--AT-A-TT--C-G--C-A-A-G-A-AC-A-CC---GG--T--G--GC-GAA-G--G-C--G-----G--C-T-C-A--CTG--G--TC-C-G-----G-A---A-C-T--GA--CG-C-T-G--A-GG--C-A-CG-A--CA-G-C---G-TG--             |    |    |     |     |     |     |     |     |    |      |    |     |    |    |     |     |     |     |     |     |    |     |     |     |    |   |    |     |   |
| GG-G--AG-C-A-AA-----CA--GG Bacteria(100);Proteobacteria(100);Alphaproteobacteria(100);Rhizobiales(100);unclassified(100);unclassified(100);unclassified(100);unclassified(100);unclassified(100);                         |    |    |     |     |     |     |     |     |    |      |    |     |    |    |     |     |     |     |     |     |    |     |     |     |    |   |    |     |   |
| Otu0141                                                                                                                                                                                                                   | 0  | 0  | 0   | 2   | 13  | 0   | 0   | 21  | 9  | 1    | 0  | 1   | 0  | 4  | 1   | 0   | 0   | 0   | 0   | 0   | 0  | 0   | 6   | 2   | 4  | 7 | 1  | 0   |   |
|                                                                                                                                                                                                                           | 1  | 61 | 15  | 55  | 2   | 95  | 5   | 10  | 14 | 4    | 13 | 16  | 4  | 27 | 25  | 52  | 9   | 7   | 1   | 18  | 30 | 69  | 0   | 19  | 8  | 0 | 0  | 7   |   |
|                                                                                                                                                                                                                           | 3  | 4  | 1   | 1   | 2   | 0   | 0   | 0   | 0  | 0    | 0  | 0   | 2  | 0  | 8   | 11  | 0   | 1   | 17  | 0   | 13 | 3   | 3   | 7   | 24 | 0 | 0  | 606 | 0 |
|                                                                                                                                                                                                                           | 25 | 39 | 32  | 8   | 2   | 5   | 7   | 0   | 0  | 0    | 1  | 2   | 0  | 4  | 0   | 8   | 10  | 16  | 0   | 0   | 0  | 0   | 5   | 0   | 0  | 0 | 7  | 0   |   |
| M02255_76_000000000-ADUNE_1_2106_20793_13793                                                                                                                                                                              |    |    |     |     |     |     |     |     |    |      |    |     |    |    |     |     |     |     |     |     |    |     |     |     |    |   |    |     |   |
| TC---GC---AG-AA-TAA-----GCA-C-C-----G--G--C---T--AACT-CTG-TG-----CC-AG-C-A-GCC-GC-----GG--T----AA-TA-CA-GA-----G-GG-T-G-C-G-----A--G-CT-G-T-T--                                                                           |    |    |     |     |     |     |     |     |    |      |    |     |    |    |     |     |     |     |     |     |    |     |     |     |    |   |    |     |   |
| -----AA---G-T-C-G-----G-A-T--G--TG--A-AA-TC--C-C-TG-A-G----CT-T-AA-----C-T-T-A-G-G-A--A-T---T-G--C-A--T-T-----C--GA-T-A--C-----T--G-G--GA--A-G-C---T-A-G-A-G-T-A--T-GG----GA-G-A-----G-G-A-T---GG-T-----AG--A--ATT----    |    |    |     |     |     |     |     |     |    |      |    |     |    |    |     |     |     |     |     |     |    |     |     |     |    |   |    |     |   |
| C-C-A-G-GT--GT-A-G-CG-GT--G---A--A-A---TG-C-GT-AG--AG-A-TC--T-G--G-A-G-G-A-AT-A-CC---GA-T--G--GC-GAA-G--G-C--A-----G--C-C-A-T--CTG--G--CC-T-A-----A-T---A-C-T--GA--CG-C-T-G--A-GG--T-A-CG-A--AA-G-C---A-TG--GG--          |    |    |     |     |     |     |     |     |    |      |    |     |    |    |     |     |     |     |     |     |    |     |     |     |    |   |    |     |   |
| G--AG-C-A-AA-----CA--GG Bacteria(100);Proteobacteria(100);Gammaproteobacteria(100);Pseudomonadales(100);Moraxellaceae(100);Acinetobacter(100);unclassified(100);unclassified(100);unclassified(100);                      |    |    |     |     |     |     |     |     |    |      |    |     |    |    |     |     |     |     |     |     |    |     |     |     |    |   |    |     |   |
| Otu0142                                                                                                                                                                                                                   | 0  | 0  | 689 | 0   | 0   | 37  | 189 | 228 | 0  | 0    | 0  | 0   | 0  | 0  | 4   | 0   | 0   | 0   | 7   | 0   | 18 | 0   | 0   | 0   | 0  | 0 | 5  | 0   |   |
|                                                                                                                                                                                                                           | 0  | 8  | 0   | 92  | 0   | 64  | 0   | 172 | 0  | 79   | 30 | 4   | 0  | 0  | 40  | 0   | 0   | 198 | 0   | 0   | 0  | 3   | 0   | 0   | 9  | 3 | 0  | 0   |   |
|                                                                                                                                                                                                                           | 41 | 94 | 15  | 5   | 0   | 0   | 0   | 0   | 0  | 10   | 8  | 24  | 0  | 9  | 312 | 706 | 7   | 17  | 29  | 419 | 44 | 8   | 0   | 0   | 0  | 0 | 0  | 190 |   |
|                                                                                                                                                                                                                           | 49 | 0  | 36  | 87  | 248 | 207 | 6   | 32  | 4  | 1283 | 26 | 645 | 0  | 34 | 9   | 0   | 0   | 0   | 7   | 46  | 81 | 128 | 170 | 0   | 18 | 0 | 0  | 0   |   |
| M02255_77_000000000-ADUT3_1_2105_23030_22631                                                                                                                                                                              |    |    |     |     |     |     |     |     |    |      |    |     |    |    |     |     |     |     |     |     |    |     |     |     |    |   |    |     |   |
| T---AC---GT-AT-GGG-----GCG-A-G-----C-G--T---T--GT-C-CGG-AA-----TT-A--T-T--GG-GC-----GT-A----AA-GG-GT-AC-----G-TA-G-G-C-G-----G--T-CT-A-T-T-----                                                                           |    |    |     |     |     |     |     |     |    |      |    |     |    |    |     |     |     |     |     |     |    |     |     |     |    |   |    |     |   |
| -----AA---G-T-C-A-----G-G-T--G--TG--A-AA-GC--G-T-GA-G-G----CT-T-AA-----C-C-T-C-A-T-T-A-----A-G--C-A--C-T-----T--GA-A-A--C-----T--G-A--TA--G-A-C---T-T-G-A-G-T--G---A-AG----GA-G-A-----G-G-A-A--AG-T-----GG--A--ATT----C-  |    |    |     |     |     |     |     |     |    |      |    |     |    |    |     |     |     |     |     |     |    |     |     |     |    |   |    |     |   |
| C-T-A-GT--GT-A-G-CG-GT--G---A--A-A---TG-C-GT-AG--AT-A-TT--A-G--G-A-G-G-A-AT-A-CC---GG--T--G--GC-GAA-G--G-C--G-----A--C-T-T-T---CTG--G--AC-T-T-----T-T---A-C-T--GA--CG-C-T-C--A-GG--T-A-CG-A--AA-G-C---G-TG--GG-G--        |    |    |     |     |     |     |     |     |    |      |    |     |    |    |     |     |     |     |     |     |    |     |     |     |    |   |    |     |   |
| AG-C-A-AA-----CA--GG Bacteria(100);Firmicutes(100);Clostridia(100);Clostridiales(100);Family_XI_Incertae_Sedis(100);Parvimonas(100);unclassified(100);unclassified(100);unclassified(100);                                |    |    |     |     |     |     |     |     |    |      |    |     |    |    |     |     |     |     |     |     |    |     |     |     |    |   |    |     |   |
| Otu0143                                                                                                                                                                                                                   | 0  | 0  | 0   | 0   | 66  | 0   | 0   | 0   | 0  | 0    | 0  | 0   | 0  | 0  | 0   | 0   | 0   | 0   | 0   | 0   | 4  | 0   | 0   | 0   | 0  | 0 | 0  | 0   |   |
|                                                                                                                                                                                                                           | 0  | 0  | 0   | 1   | 0   | 0   | 0   | 36  | 0  | 0    | 43 | 0   | 0  | 34 | 56  | 0   | 0   | 0   | 0   | 0   | 0  | 0   | 0   | 0   | 0  | 0 | 0  | 0   |   |
|                                                                                                                                                                                                                           | 0  | 0  | 0   | 0   | 8   | 0   | 0   | 0   | 0  | 0    | 0  | 0   | 0  | 14 | 0   | 0   | 0   | 0   | 0   | 0   | 0  | 0   | 0   | 0   | 0  | 0 | 0  | 31  |   |
|                                                                                                                                                                                                                           | 0  | 0  | 0   | 0   | 0   | 34  | 0   | 0   | 0  | 22   | 0  | 0   | 0  | 0  | 0   | 0   | 0   | 0   | 0   | 0   | 0  | 0   | 0   | 0   | 18 | 0 | 0  | 0   |   |
| M02255_77_000000000-ADUT3_1_2116_19208_15764                                                                                                                                                                              |    |    |     |     |     |     |     |     |    |      |    |     |    |    |     |     |     |     |     |     |    |     |     |     |    |   |    |     |   |
| T---AC---GT-AG-GTC-----GCA-A-G-----C-G--T---T--GT-C-CGG-AT-----TT-A--C-T--GG-GC-----GT-A----AA-GA-GC-GC-----G-CA-G-G-C-G-----G--C-TG-G-T-C-----                                                                           |    |    |     |     |     |     |     |     |    |      |    |     |    |    |     |     |     |     |     |     |    |     |     |     |    |   |    |     |   |
| -----AA---G-T-C-C-----G-A-T--G--TG--A-AA-TC--T-C-CC-G-G----CT-C-AA-----C-T-G-G-G-A-A--A-C---T-G--C-A--T-C-----G--GA-A-A--C-----T--G-A--TC--G-G-C---T-T-G-A-A-G--G---T-GG----GA-G-A-----G-G-G-T---AG-T-----GG--A--ATT----  |    |    |     |     |     |     |     |     |    |      |    |     |    |    |     |     |     |     |     |     |    |     |     |     |    |   |    |     |   |
| C-C-C-G-GT--GT-A-G-TG-GT--G---A--A-A---TG-C-GT-AG--AT-A-TC--G-G--G-A-G-G-A-AC-A-CC---AG--T--G--GC-GAA-G--G-C--G-----A--C-T-A-C---CTG--G--CC-C-A-----T-T---C-T-T--GA--CG-C-T-G--A-GG--C-G-CG-A--AA-G-C---T-AG--GG--        |    |    |     |     |     |     |     |     |    |      |    |     |    |    |     |     |     |     |     |     |    |     |     |     |    |   |    |     |   |
| G--AG-C-G-AA-----CG--GG Bacteria(100);unclassified(100);unclassified(100);unclassified(100);unclassified(100);unclassified(100);unclassified(100);unclassified(100);unclassified(100);                                    |    |    |     |     |     |     |     |     |    |      |    |     |    |    |     |     |     |     |     |     |    |     |     |     |    |   |    |     |   |
| Otu0144                                                                                                                                                                                                                   | 0  | 0  | 0   | 91  | 0   | 0   | 0   | 22  | 0  | 0    | 0  | 0   | 0  | 21 | 0   | 0   | 0   | 0   | 0   | 79  | 0  | 0   | 59  | 10  | 0  | 1 | 3  | 28  |   |
|                                                                                                                                                                                                                           | 0  | 1  | 4   | 0   | 0   | 0   | 0   | 0   | 0  | 60   | 41 | 45  | 0  | 0  | 0   | 0   | 0   | 46  | 0   | 0   | 8  | 0   | 16  | 0   | 0  | 0 | 0  | 0   |   |
|                                                                                                                                                                                                                           | 0  | 0  | 2   | 0   | 0   | 0   | 7   | 0   | 0  | 0    | 4  | 0   | 0  | 0  | 59  | 29  | 174 | 0   | 126 | 0   | 6  | 0   | 79  | 0   | 0  | 0 | 0  | 355 |   |
|                                                                                                                                                                                                                           | 0  | 0  | 0   | 178 | 0   | 0   | 0   | 5   | 0  | 0    | 0  | 93  | 0  | 0  | 0   | 0   | 0   | 0   | 0   | 0   | 0  | 0   | 0   | 6   | 0  | 0 | 0  | 0   |   |
| M02255_77_000000000-ADUT3_1_1102_13249_18506                                                                                                                                                                              |    |    |     |     |     |     |     |     |    |      |    |     |    |    |     |     |     |     |     |     |    |     |     |     |    |   |    |     |   |
| T---AC---GG-AG-GGG-----GCT-A-G-----C-G--T---T--GT-T-CGG-AA-----TT-A--C-T--GG-GC-----GT-A----AA-GC-GC-AC-----G-TA-G-G-C-G-----G--A-CC-G-G-A---                                                                             |    |    |     |     |     |     |     |     |    |      |    |     |    |    |     |     |     |     |     |     |    |     |     |     |    |   |    |     |   |
| -----AA---G-T-C-A-----G-A-G--G--TG--A-AA-TC--C-C-AG-G-G----CT-C-AA-----C-C-T-T-G-G-A--A-C---T-G--C-C---T-T-----T--GA-A-A--C-----T--A-T--CG--G-T-C---T-G-G-A-G-T--T---C-GA----GA-G-A-----G-G-T-G---AG-T-----GG--A--ATT---- |    |    |     |     |     |     |     |     |    |      |    |     |    |    |     |     |     |     |     |     |    |     |     |     |    |   |    |     |   |
| C-C-G-A-GT--GT-A-G-AG-GT--G---A--A-A---TT-C-GT-AG--AT-A-TT--C-G--G-A-G-G-A-AC-A-CC---AG--T--G--GC-GAA-G--G-C--G-----G--C-T-C-A--CTG--G--CT-C-G-----A-T---A-C-T--GA--CG-C-T-G--A-GG--T-G-CG-A--AA-G-C---G-TG--GG--         |    |    |     |     |     |     |     |     |    |      |    |     |    |    |     |     |     |     |     |     |    |     |     |     |    |   |    |     |   |
| G--AG-C-A-AA-----CA--GG Bacteria(100);Proteobacteria(100);Alphaproteobacteria(100);Rhodobacterales(100);Rhodobacteraceae(100);unclassified(100);unclassified(100);unclassified(100);unclassified(100);                    |    |    |     |     |     |     |     |     |    |      |    |     |    |    |     |     |     |     |     |     |    |     |     |     |    |   |    |     |   |



|                                                                                                                                                                                                                              |     |    |     |     |    |     |    |    |     |     |    |    |    |    |     |    |    |     |     |     |   |    |    |    |   |    |   |   |
|------------------------------------------------------------------------------------------------------------------------------------------------------------------------------------------------------------------------------|-----|----|-----|-----|----|-----|----|----|-----|-----|----|----|----|----|-----|----|----|-----|-----|-----|---|----|----|----|---|----|---|---|
| Otu0145                                                                                                                                                                                                                      | 0   | 0  | 0   | 0   | 0  | 0   | 0  | 0  | 0   | 0   | 1  | 35 | 1  | 6  | 7   | 0  | 0  | 22  | 3   | 31  | 0 | 7  | 0  | 0  | 0 | 4  | 0 | 0 |
| 9                                                                                                                                                                                                                            | 0   | 0  | 0   | 0   | 0  | 0   | 0  | 1  | 0   | 0   | 0  | 0  | 0  | 0  | 0   | 0  | 0  | 0   | 0   | 0   | 0 | 0  | 0  | 0  | 0 | 0  | 0 | 0 |
| 4                                                                                                                                                                                                                            | 0   | 2  | 0   | 0   | 0  | 13  | 0  | 0  | 0   | 12  | 0  | 0  | 0  | 0  | 0   | 0  | 6  | 0   | 0   | 0   | 0 | 0  | 0  | 0  | 0 | 0  | 0 | 0 |
| 0                                                                                                                                                                                                                            | 0   | 0  | 0   | 0   | 10 | 0   | 0  | 0  | 0   | 3   | 0  | 0  | 1  | 1  | 0   | 0  | 0  | 0   | 0   | 0   | 0 | 0  | 0  | 0  | 0 | 0  | 0 | 0 |
| M02255_77_000000000-ADUT3_1_1104_14187_13141 C---TG---TG-CC-AGC-----AGC-C-G-----C--G--G--T--AA-TACAG-AG-----GG-T--G-C--AA-GC-----GT--T----AA-TC-GG-AT-----T-TA-G-G-T-G-----G--C-CA-A-T-T-----                                |     |    |     |     |    |     |    |    |     |     |    |    |    |    |     |    |    |     |     |     |   |    |    |    |   |    |   |   |
| -----AA---G-T-C-A-----A-A-T--G--TG--A-AA-TC--C-C-CG-A-G-----CT-T-AA-----C-T-T-G-G-G-A--A-T---T-G--C-A---T-T-----C--GA-T-A---C-----T--G-G--TT--G-G-C---T-A-G-A-G-T-A---T-GG-----GA-G-A-----G-G-A-T---GG-T-----AG--A--ATT---C- |     |    |     |     |    |     |    |    |     |     |    |    |    |    |     |    |    |     |     |     |   |    |    |    |   |    |   |   |
| C-A-G-GT--GT-A-G-CG-GT--G---A--A-A---TG-C-GT-AG--AG-A-TC--T-G--G-A-G-G-A-AT-A-CC---GA--T--G--GC-GAA-G--G-C--A-----G--C-C-A-T---CTG--G--CC-T-A-----A-T---A-C-T--GA--CA-C-T-G--A-GG--T-A-CG-A--AA-G-C---A-TG--GG-G-            |     |    |     |     |    |     |    |    |     |     |    |    |    |    |     |    |    |     |     |     |   |    |    |    |   |    |   |   |
| -AG-C-A-AA-----CA--GG Bacteria(100);Proteobacteria(100);Gammaproteobacteria(100);Pseudomonadales(100);Moraxellaceae(100);Acinetobacter(100);unclassified(100);unclassified(100);unclassified(100);                           |     |    |     |     |    |     |    |    |     |     |    |    |    |    |     |    |    |     |     |     |   |    |    |    |   |    |   |   |
| Otu0146                                                                                                                                                                                                                      | 0   | 0  | 0   | 130 | 0  | 0   | 0  | 0  | 0   | 0   | 0  | 0  | 0  | 0  | 0   | 0  | 0  | 0   | 7   | 0   | 0 | 0  | 0  | 0  | 0 | 0  | 0 | 1 |
| 0                                                                                                                                                                                                                            | 0   | 1  | 111 | 0   | 0  | 0   | 0  | 0  | 0   | 0   | 48 | 0  | 0  | 0  | 44  | 83 | 0  | 0   | 0   | 0   | 1 | 31 | 0  | 0  | 0 | 0  | 0 | 0 |
| 0                                                                                                                                                                                                                            | 0   | 0  | 19  | 0   | 0  | 0   | 0  | 0  | 0   | 0   | 1  | 0  | 1  | 77 | 226 | 0  | 0  | 153 | 114 | 132 | 0 | 0  | 0  | 0  | 0 | 0  | 0 | 2 |
| 57                                                                                                                                                                                                                           | 0   | 0  | 0   | 0   | 35 | 5   | 22 | 0  | 137 | 0   | 52 | 0  | 0  | 0  | 56  | 0  | 37 | 0   | 33  | 483 | 0 | 59 | 0  | 11 | 0 | 13 |   |   |
| M02255_77_000000000-ADUT3_1_1101_7605_10091 T---AC---GT-AG-GGG-----GCA-A-G-----C--G--T---T--AT-C-CGG-AA-----TT-A--T-T--GG-GC-----GT--A-----AA-GA-GT-GC-----G-TA-G-G-T-G-----G--T-TA-C-C-T-----AA-                            |     |    |     |     |    |     |    |    |     |     |    |    |    |    |     |    |    |     |     |     |   |    |    |    |   |    |   |   |
| ---G-C-G-C-----A-A-G--G--TT--T-AA-TT--T-A-GA-G-G-----CT-C-AA-----C-C-T-C-T-A-C--T-----T-G--C-C---T-T-----G--CG-A-A---C-----T--G-G--GC--T-A-C---T-T-G-A-G-T-G---C-AG---GA-G-G-----G-G-A-A---AG-C-----GG--A--ATT---C-C-T-A-    |     |    |     |     |    |     |    |    |     |     |    |    |    |    |     |    |    |     |     |     |   |    |    |    |   |    |   |   |
| GT--GT-A-G-CG-GT--G---A--A-A---TG-C-GT-AG--AT-A-TT--A-G--G-A-G-G-A-AC-A-CC---AG--C--G--GC-GAA-G--G-C--G-----G--C-T-T-T---CTG--G--AC-T-G-----T-A---A-C-T--GA--CA-C-T-G--A-GG--C-A-CG-A--AA-G-C---G-TG--GG-T--AG-C-            |     |    |     |     |    |     |    |    |     |     |    |    |    |    |     |    |    |     |     |     |   |    |    |    |   |    |   |   |
| A-AA-----CA--GG Bacteria(100);Firmicutes(100);Clostridia(100);Clostridiales(100);Family_XIII_Incertae_Sedis(100);Mogibacterium(100);unclassified(100);unclassified(100);unclassified(100);                                   |     |    |     |     |    |     |    |    |     |     |    |    |    |    |     |    |    |     |     |     |   |    |    |    |   |    |   |   |
| Otu0147                                                                                                                                                                                                                      | 0   | 0  | 0   | 0   | 0  | 0   | 0  | 42 | 0   | 0   | 0  | 0  | 0  | 0  | 0   | 0  | 0  | 0   | 0   | 0   | 1 | 1  | 0  | 0  | 0 | 0  | 4 | 0 |
| 5                                                                                                                                                                                                                            | 0   | 28 | 14  | 223 | 9  | 274 | 0  | 0  | 0   | 367 | 3  | 0  | 39 | 0  | 0   | 0  | 0  | 13  | 0   | 0   | 0 | 33 | 0  | 58 | 0 | 0  | 0 | 0 |
| 0                                                                                                                                                                                                                            | 0   | 0  | 0   | 0   | 0  | 0   | 0  | 0  | 0   | 0   | 0  | 0  | 9  | 0  | 0   | 0  | 0  | 0   | 0   | 0   | 0 | 0  | 0  | 0  | 0 | 0  | 0 | 0 |
| 0                                                                                                                                                                                                                            | 0   | 0  | 38  | 0   | 0  | 44  | 0  | 0  | 0   | 0   | 0  | 6  | 0  | 0  | 163 | 0  | 0  | 0   | 0   | 0   | 0 | 0  | 0  | 22 | 0 | 0  |   |   |
| M02255_77_000000000-ADUT3_1_1106_24316_16982 T---AC---GA-AG-GGG-----GCT-A-G-----C--G--T---T--GC-T-CGG-AA-----TC-A--C-T--GG-GC-----GT--A-----AA-GG-GT-GC-----G-TA-G-G-C-G-----G--G-TT-T-T-T-----                              |     |    |     |     |    |     |    |    |     |     |    |    |    |    |     |    |    |     |     |     |   |    |    |    |   |    |   |   |
| -----AA---G-T-C-A-----G-A-G--G--TG--A-AA-TC--C-T-GG-A-G-----CT-C-AA-----C-T-C-C-A-G-A--A-C---T-G--C-C---T-T-----T--GA-T-A---C-----T--G-A--AA--G-T-C---T-T-G-A-G-T-A---T-GG-----GA-G-A-----G-G-T-G---AG-T-----GG--A--ACT---G- |     |    |     |     |    |     |    |    |     |     |    |    |    |    |     |    |    |     |     |     |   |    |    |    |   |    |   |   |
| C-G-A-GT--GT-A-G-AG-GT--G---A--A-A---TT-C-GT-AG--AT-A-TT--C-G--C-A-A-G-A-AC-A-CC---AG--T--G--GC-GAA-G--G-C--G-----G--C-T-C-A---CTG--G--CC-C-A-----T-A---A-C-T--GA--CG-C-T-G--A-GG--C-A-CG-A--AA-G-C---G-TG--GG-G-            |     |    |     |     |    |     |    |    |     |     |    |    |    |    |     |    |    |     |     |     |   |    |    |    |   |    |   |   |
| -AG-C-A-AA-----CA--GG Bacteria(100);Proteobacteria(100);Alphaproteobacteria(100);Rhizobiales(100);Bradyrhizobiaceae(100);unclassified(100);unclassified(100);unclassified(100);unclassified(100);                            |     |    |     |     |    |     |    |    |     |     |    |    |    |    |     |    |    |     |     |     |   |    |    |    |   |    |   |   |
| Otu0148                                                                                                                                                                                                                      | 0   | 0  | 0   | 0   | 0  | 32  | 0  | 0  | 0   | 0   | 0  | 0  | 0  | 0  | 0   | 0  | 0  | 0   | 0   | 0   | 0 | 1  | 0  | 0  | 0 | 0  | 0 | 0 |
| 0                                                                                                                                                                                                                            | 0   | 0  | 0   | 0   | 0  | 0   | 63 | 24 | 20  | 28  | 0  | 16 | 0  | 0  | 0   | 0  | 0  | 0   | 0   | 0   | 0 | 0  | 0  | 0  | 0 | 0  | 0 | 0 |
| 0                                                                                                                                                                                                                            | 0   | 0  | 0   | 0   | 0  | 0   | 0  | 0  | 0   | 0   | 0  | 0  | 0  | 0  | 0   | 0  | 18 | 0   | 0   | 0   | 0 | 0  | 0  | 0  | 0 | 0  | 0 | 0 |
| 0                                                                                                                                                                                                                            | 0   | 0  | 70  | 0   | 0  | 37  | 0  | 0  | 0   | 0   | 0  | 0  | 0  | 0  | 0   | 0  | 0  | 0   | 0   | 0   | 0 | 11 | 0  | 0  | 0 | 0  |   |   |
| M02255_77_000000000-ADUT3_1_1109_16667_5531 C---AC---GT-AG-GCA-----CCA-A-G-----C--G--T---T--GT-C-CGG-AT-----TT-A--T-T--GG-GC-----GT--A-----AA-GA-GC-TC-----G-TA-G-G-C-G-----G--T-TC-G-G-T-----AA--                           |     |    |     |     |    |     |    |    |     |     |    |    |    |    |     |    |    |     |     |     |   |    |    |    |   |    |   |   |
| --G-T-C-G-----G-G-T--G--TG--A-AA-AC--T-C-TG-G-G-----CT-C-AA-----C-C-C-A-G-A-G--C-----C-G-CC-A---C--C-----C--GA-T-A---C-----T--G-C--TG-TG-A-C---T-C-G-A-G-T-G---C-GG-----TA-G-G-----G-G-A-G---CG-G-----GG--A--ATT---C-C-T-G-  |     |    |     |     |    |     |    |    |     |     |    |    |    |    |     |    |    |     |     |     |   |    |    |    |   |    |   |   |
| GT--GT-A-G-CG-GT--G---A--A-A---TG-C-GC-AG--AT-A-TC--A-G--G-A-G-G-A-AC-A-CC---AG--T--G--GC-GAA-G--G-C--G-----C--C-G-C-T---CTG--G--GC-C-G-----T-G---A-C-T--GA--CG-C-T-G--A-GG--A-G-CG-A--AA-G-C---G-TG--GG-T--AG-              |     |    |     |     |    |     |    |    |     |     |    |    |    |    |     |    |    |     |     |     |   |    |    |    |   |    |   |   |
| C-A-AA-----CA--GG Bacteria(100);Actinobacteria(100);Actinobacteria(100);Acidimicrobidae(100);Acidimicrobiales(100);Acidimicrobineae(100);Acidimicrobiaceae(100);uncultured(75);unclassified(75);                             |     |    |     |     |    |     |    |    |     |     |    |    |    |    |     |    |    |     |     |     |   |    |    |    |   |    |   |   |
| Otu0149                                                                                                                                                                                                                      | 335 | 0  | 0   | 0   | 0  | 0   | 0  | 0  | 0   | 0   | 0  | 0  | 0  | 0  | 0   | 0  | 0  | 1   | 0   | 0   | 0 | 5  | 0  | 0  | 1 | 0  | 3 | 2 |
| 0                                                                                                                                                                                                                            | 0   | 0  | 0   | 0   | 0  | 0   | 0  | 0  | 0   | 0   | 0  | 0  | 0  | 0  | 0   | 0  | 0  | 0   | 0   | 0   | 0 | 0  | 19 | 0  | 0 | 0  | 0 | 0 |
| 0                                                                                                                                                                                                                            | 0   | 0  | 0   | 0   | 0  | 0   | 0  | 0  | 0   | 0   | 0  | 0  | 0  | 0  | 0   | 0  | 0  | 0   | 0   | 0   | 0 | 0  | 0  | 0  | 0 | 0  | 0 | 0 |
| 0                                                                                                                                                                                                                            | 0   | 0  | 70  | 0   | 0  | 37  | 0  | 0  | 0   | 0   | 0  | 0  | 0  | 0  | 0   | 0  | 0  | 0   | 0   | 0   | 0 | 11 | 0  | 0  | 0 | 0  |   |   |
| M02255_77_000000000-ADUT3_1_1111_4054_8793 T---AC---GA-GG-GGG-----GCA-A-G-----C--G--T---T--GT-T-CGG-AA-----TT-A--T-T--GG-GC-----GT--A-----AA-GG-GC-GC-----G-TA-G-G-C-G-----G--T-TT-G-G-C-----                                |     |    |     |     |    |     |    |    |     |     |    |    |    |    |     |    |    |     |     |     |   |    |    |    |   |    |   |   |
| AA---G-T-T-T-----G-G-T--G--TG--A-AA-TC--T-T-CG-G-G-----CT-C-AA-----C-T-C-G-A-A-G--T-C---T-G--C-A---C--C-----G--AA-A-A---C-----T--G-C--CG--G-G-C---T-T-G-A-G-T-A---T-GG-----GA-G-A-----G-G-T-G---AG-T-----GG--A--ATT---T-C-C- |     |    |     |     |    |     |    |    |     |     |    |    |    |    |     |    |    |     |     |     |   |    |    |    |   |    |   |   |
| G-GT--GT-A-G-CG-GT--G---A--A-A---TG-C-GT-AG--AT-A-TC--G-G--A-A-G-G-A-AC-A-CC---TG--T--G--GC-GAA-A--G-C--G-----G--C-T-C-A---CTG--G--AC-C-A-----T-T---A-C-T--GA--CG-C-T-G--A-GG--C-G-CG-A--AA-G-C---T-AG--GG-G--               |     |    |     |     |    |     |    |    |     |     |    |    |    |    |     |    |    |     |     |     |   |    |    |    |   |    |   |   |
| AG-C-A-AA-----CA--GG Bacteria(100);Acidobacteria(100);Acidobacteria(100);Acidobacteriales(100);Acidobacteriaceae(100);unclassified(96);unclassified(96);unclassified(96);unclassified(96);                                   |     |    |     |     |    |     |    |    |     |     |    |    |    |    |     |    |    |     |     |     |   |    |    |    |   |    |   |   |



[illegible]



|         |                                                                                                                                                                                                                    |     |    |     |    |    |    |    |    |   |    |   |    |     |     |    |    |     |    |    |    |    |   |    |    |    |     |    |
|---------|--------------------------------------------------------------------------------------------------------------------------------------------------------------------------------------------------------------------|-----|----|-----|----|----|----|----|----|---|----|---|----|-----|-----|----|----|-----|----|----|----|----|---|----|----|----|-----|----|
| Otu0155 | 0                                                                                                                                                                                                                  | 20  | 22 | 3   | 0  | 0  | 0  | 0  | 0  | 0 | 0  | 0 | 0  | 0   | 0   | 0  | 0  | 0   | 0  | 0  | 0  | 0  | 0 | 0  | 0  | 0  | 0   |    |
|         | 0                                                                                                                                                                                                                  | 0   | 0  | 0   | 0  | 17 | 0  | 0  | 1  | 0 | 0  | 0 | 0  | 0   | 0   | 0  | 0  | 0   | 0  | 0  | 0  | 0  | 0 | 0  | 0  | 4  | 7   |    |
|         | 0                                                                                                                                                                                                                  | 0   | 2  | 0   | 0  | 0  | 0  | 0  | 0  | 0 | 0  | 0 | 0  | 0   | 0   | 6  | 0  | 0   | 8  | 0  | 0  | 0  | 0 | 0  | 0  | 0  | 2   |    |
|         | 12                                                                                                                                                                                                                 | 0   | 0  | 11  | 23 | 0  | 0  | 0  | 0  | 0 | 0  | 0 | 6  | 0   | 13  | 0  | 13 | 0   | 7  | 0  | 0  | 8  | 0 | 0  | 0  | 18 |     |    |
|         | M02255_76_000000000-ADUNE_1_2110_18689_13556 C---GG---CT-AA-TTC-----CGT-G-C-----C-A-A-G---C-AG-C-CGC-GG-----TA-A-T-A-CG-GA-----AG-G---TC-CA-GG-CG-----T-TA-T-C-C-G-----G-ATTT-G-T-T-----                           |     |    |     |    |    |    |    |    |   |    |   |    |     |     |    |    |     |    |    |    |    |   |    |    |    |     |    |
|         | ----AA----G-T-C-A-----G-C-G--G--TT--A-AA-GG--G-T-GT-G-G----CT-C-AA-----C-C-A-T-A-C---A-T---T-G--C-C--G-T-----T-GA-A-A--C-----T-G-G--CG--A-T-C---T-T-G-A-G-T-G--C-AG----AC-A-G-----G-G-A-T--GC-C-----GG--A-ATT---C- |     |    |     |    |    |    |    |    |   |    |   |    |     |     |    |    |     |    |    |    |    |   |    |    |    |     |    |
|         | G-T-G-GT--GT-A-G-CG-GT--G---A-A-A---TG-C-TT-AG--AT-A-TC--A-C--G-A-A-G-A-AC-T-CC--GA--T--C--GC-GAA-G--G-C-A-----G-G-T-G-T---CCG-G--GC-T-G-----C-A--A-C-T-GA--CG-C-T-G--A-GG--C-T-CG-A-AA-G-T---G-TG--GG-T-          |     |    |     |    |    |    |    |    |   |    |   |    |     |     |    |    |     |    |    |    |    |   |    |    |    |     |    |
|         | -AT-C-A-AA-----CA--GG Bacteria(100);Bacteroidetes(100);unclassified(100);unclassified(100);unclassified(100);unclassified(100);unclassified(100);unclassified(100);unclassified(100);                              |     |    |     |    |    |    |    |    |   |    |   |    |     |     |    |    |     |    |    |    |    |   |    |    |    |     |    |
| Otu0156 | 0                                                                                                                                                                                                                  | 0   | 0  | 300 | 0  | 17 | 30 | 11 | 26 | 0 | 0  | 0 | 0  | 0   | 0   | 0  | 0  | 0   | 0  | 0  | 6  | 0  | 0 | 9  | 0  | 0  | 0   | 13 |
|         | 3                                                                                                                                                                                                                  | 0   | 0  | 44  | 0  | 60 | 10 | 0  | 21 | 1 | 18 | 0 | 0  | 0   | 0   | 0  | 0  | 146 | 0  | 0  | 28 | 40 | 7 | 0  | 0  | 0  | 114 |    |
|         | 1                                                                                                                                                                                                                  | 355 | 0  | 0   | 2  | 0  | 0  | 0  | 0  | 0 | 0  | 0 | 0  | 244 | 360 | 28 | 0  | 90  | 0  | 0  | 5  | 0  | 0 | 47 | 0  | 0  | 0   | 0  |
|         | 36                                                                                                                                                                                                                 | 0   | 0  | 0   | 0  | 1  | 0  | 0  | 0  | 0 | 0  | 0 | 32 | 0   | 0   | 0  | 0  | 43  | 71 | 43 | 9  | 0  | 0 | 1  | 81 |    |     |    |
|         | M02255_77_000000000-ADUT3_1_1102_5427_11006 T---AC---GT-AG-GAT-----CCG-A-G-----C-G--T---T-AT-C-CGG-AG-----TG-A-C-T--GG-GC-----GT-A---AA-GA-GTTGC-----G-TA-G-G-C-G-----G--T-TT-G-T-T-----AA-                        |     |    |     |    |    |    |    |    |   |    |   |    |     |     |    |    |     |    |    |    |    |   |    |    |    |     |    |
|         | ---G-T-G-A-----A-T-A-G--TG--A-AA-TC--T-G-GT-G-G----CT-C-AA-----C-C-A-T-ACA-G--G-C---T-A-T-T--A-T-----T-CA-A-A--C-----T-G-G--CA--A-A-C---T-C-G-A-G-A-G--T-GG-----TA-G-A-----G-G-T-C--AC-T-----GG--A-ATT---T-C-T-T-  |     |    |     |    |    |    |    |    |   |    |   |    |     |     |    |    |     |    |    |    |    |   |    |    |    |     |    |
|         | GT--GT-A-G-GA-GT--G---A-A-A---TC-C-GT-AG--AT-A-TA--A-G--A-A-G-G-A-AC-A-CC--GA--T--G--GC-GTA-G--G-C-A-----G-G-T-G-A---CTG-G--AC-C-A-----T-T---T-C-T-GA--CG-C-T-A--A-GG--C-A-CG-A-AA-G-C---G-TG--GG-G--AG-           |     |    |     |    |    |    |    |    |   |    |   |    |     |     |    |    |     |    |    |    |    |   |    |    |    |     |    |
|         | C-G-AA-----CC--GG Bacteria(100);Candidate_division_TM7(100);unclassified(100);unclassified(100);unclassified(100);unclassified(100);unclassified(100);unclassified(100);unclassified(100);                         |     |    |     |    |    |    |    |    |   |    |   |    |     |     |    |    |     |    |    |    |    |   |    |    |    |     |    |
| Otu0157 | 0                                                                                                                                                                                                                  | 0   | 0  | 0   | 0  | 0  | 0  | 0  | 0  | 0 | 0  | 0 | 5  | 0   | 2   | 0  | 0  | 2   | 0  | 0  | 0  | 0  | 0 | 0  | 0  | 0  | 0   | 0  |
|         | 0                                                                                                                                                                                                                  | 0   | 0  | 0   | 0  | 0  | 0  | 0  | 0  | 0 | 0  | 0 | 0  | 0   | 0   | 0  | 0  | 0   | 0  | 0  | 0  | 0  | 0 | 0  | 2  | 4  | 2   | 0  |
|         | 1                                                                                                                                                                                                                  | 0   | 0  | 0   | 2  | 0  | 0  | 2  | 0  | 2 | 0  | 0 | 5  | 0   | 0   | 0  | 0  | 0   | 0  | 0  | 0  | 0  | 0 | 0  | 0  | 0  | 0   | 0  |
|         | 0                                                                                                                                                                                                                  | 0   | 0  | 0   | 0  | 0  | 1  | 0  | 0  | 1 | 0  | 0 | 0  | 1   | 0   | 0  | 0  | 0   | 0  | 0  | 0  | 0  | 0 | 0  | 0  | 0  | 0   |    |
|         | M02255_76_000000000-ADUNE_1_1116_21055_23480 T---AC---CG-AC-AGA-----ATA-A-G-----C---A--C--CG-G-CTA-AC-----TC-T--G-T--GC-CA-----GC--AG---CC-GC-GG-TA-----A-TACA-G-A-G-----G--G-TA-G-T-C-----                        |     |    |     |    |    |    |    |    |   |    |   |    |     |     |    |    |     |    |    |    |    |   |    |    |    |     |    |
|         | ----AA---GCG-T-T-----A-A-T-C--GG--A-AA-TC--C-C-CG-G-G----CT-C-AA-----C-C-T-G-G-G-A--A-C---T-G--C-A--T-T-----C-AA-A-A--C-----T-G-A--CT--G-A-C---T-A-G-A-G-T-A--T-GG-----TA-G-A-----G-G-G-T--GG-T-----GG--A-ATT---T- |     |    |     |    |    |    |    |    |   |    |   |    |     |     |    |    |     |    |    |    |    |   |    |    |    |     |    |
|         | C-C-T-GT--GT-A-G-CG-GT--G---A-A-A---TG-C-GT-AG--AT-A-TA--G-G--A-A-G-G-A-AC-A-CC--AG--T--G--GC-GAA-G--G-C-G-----A--C-C-A-C---CTG-G--AC-T-G-----A-T---A-C-T-GA--CA-C-T-G--A-GG--T-G-CG-A-AA-G-C---G-TG--GG-G--       |     |    |     |    |    |    |    |    |   |    |   |    |     |     |    |    |     |    |    |    |    |   |    |    |    |     |    |
|         | G--AG-C-A-AA-----CA--GG Bacteria(100);Proteobacteria(100);Gammaproteobacteria(100);unclassified(100);unclassified(100);unclassified(100);unclassified(100);unclassified(100);unclassified(100);                    |     |    |     |    |    |    |    |    |   |    |   |    |     |     |    |    |     |    |    |    |    |   |    |    |    |     |    |
| Otu0158 | 0                                                                                                                                                                                                                  | 0   | 0  | 61  | 0  | 0  | 0  | 0  | 0  | 0 | 0  | 0 | 0  | 0   | 0   | 0  | 0  | 0   | 0  | 0  | 0  | 0  | 0 | 0  | 0  | 0  | 0   | 0  |
|         | 0                                                                                                                                                                                                                  | 0   | 0  | 48  | 0  | 0  | 0  | 0  | 0  | 0 | 37 | 0 | 0  | 0   | 0   | 0  | 0  | 0   | 0  | 0  | 3  | 23 | 0 | 0  | 0  | 0  | 0   |    |
|         | 12                                                                                                                                                                                                                 | 0   | 0  | 0   | 0  | 0  | 0  | 2  | 0  | 0 | 0  | 0 | 0  | 0   | 0   | 5  | 0  | 0   | 0  | 0  | 0  | 27 | 0 | 0  | 0  | 0  | 16  |    |
|         | 0                                                                                                                                                                                                                  | 0   | 0  | 0   | 0  | 27 | 0  | 0  | 0  |   |    |   |    |     |     |    |    |     |    |    |    |    |   |    |    |    |     |    |



|                                                                                                                                                                                                                              |    |     |   |    |     |    |    |   |    |    |    |    |   |    |   |     |    |   |     |     |    |    |    |    |     |     |    |     |
|------------------------------------------------------------------------------------------------------------------------------------------------------------------------------------------------------------------------------|----|-----|---|----|-----|----|----|---|----|----|----|----|---|----|---|-----|----|---|-----|-----|----|----|----|----|-----|-----|----|-----|
| Otu0160                                                                                                                                                                                                                      | 0  | 0   | 0 | 36 | 0   | 0  | 0  | 0 | 34 | 0  | 0  | 0  | 0 | 0  | 0 | 0   | 0  | 0 | 0   | 4   | 0  | 0  | 0  | 0  | 0   | 0   | 0  |     |
|                                                                                                                                                                                                                              | 0  | 0   | 0 | 0  | 0   | 81 | 0  | 0 | 0  | 0  | 0  | 0  | 0 | 0  | 0 | 0   | 0  | 0 | 0   | 0   | 0  | 0  | 0  | 0  | 28  | 0   | 0  | 0   |
|                                                                                                                                                                                                                              | 0  | 0   | 0 | 0  | 0   | 0  | 0  | 0 | 0  | 0  | 0  | 0  | 0 | 0  | 0 | 0   | 0  | 0 | 0   | 0   | 7  | 0  | 0  | 0  | 0   | 0   | 0  | 0   |
|                                                                                                                                                                                                                              | 0  | 0   | 0 | 48 | 0   | 0  | 0  | 0 | 0  | 3  | 0  | 0  | 0 | 0  | 0 | 0   | 0  | 0 | 0   | 0   | 0  | 0  | 0  | 0  | 0   | 0   |    |     |
| M02255_77_000000000-ADUT3_1_1113_15921_5263 T---AC---GA-AG-GGG-----GCT-A-G-----C--G--T---T--GC-T-CGG-AA-----TT-A--C-T--GG-GC-----GT--A----AA-GG-GC-GC-----G-TA-G-G-C-G-----G--C-TT-G-G-T-----                                |    |     |   |    |     |    |    |   |    |    |    |    |   |    |   |     |    |   |     |     |    |    |    |    |     |     |    |     |
| TA---G-T-C-A-----G-G-C-G-TG--A-AA-TT--C-C-CG-G-G-----CT-T-AA-----C-C-T-G-G-G-G--A-C---T-G--C-G---C--T-----T--GA-T-A--C-----T--G-C--TG--G-G-C---T-T-G-A-G-G--G---T-GG----AA-G-A-----G-G-G-T---CG-T-----GG--A--ATT---C-C-C-    |    |     |   |    |     |    |    |   |    |    |    |    |   |    |   |     |    |   |     |     |    |    |    |    |     |     |    |     |
| A-GT--GT-A-G-AG-GT--G---A--A-A---TT-C-GT-AG--AT-A-TT--G-G--G-A-A-G-A-AC-A-CC---GG--T--G--GC-GAA-G--G-C--G-----G--C-G-A-C---CTG--G--TC-C-A-----T-T---A-C-T--GA--CG-C-T-G--A-GG--C-G-CG-A--CA-G-C---G-TG--GG-G--               |    |     |   |    |     |    |    |   |    |    |    |    |   |    |   |     |    |   |     |     |    |    |    |    |     |     |    |     |
| AG-C-A-AA-----CA--GG Bacteria(100);Proteobacteria(100);Alphaproteobacteria(100);Rhodospirillales(100);Acetobacteraceae(100);unclassified(100);unclassified(100);unclassified(100);unclassified(100);                         |    |     |   |    |     |    |    |   |    |    |    |    |   |    |   |     |    |   |     |     |    |    |    |    |     |     |    |     |
| Otu0161                                                                                                                                                                                                                      | 0  | 0   | 0 | 2  | 6   | 5  | 1  | 0 | 0  | 11 | 22 | 19 | 2 | 2  | 2 | 7   | 1  | 1 | 1   | 3   | 0  | 8  | 5  | 17 | 2   | 4   | 2  | 6   |
|                                                                                                                                                                                                                              | 24 | 0   | 0 | 0  | 0   | 0  | 0  | 0 | 0  | 1  | 0  | 0  | 0 | 0  | 0 | 23  | 1  | 0 | 2   | 1   | 0  | 0  | 0  | 0  | 0   | 0   | 0  | 0   |
|                                                                                                                                                                                                                              | 0  | 0   | 0 | 0  | 0   | 0  | 0  | 0 | 0  | 0  | 0  | 0  | 0 | 0  | 0 | 0   | 0  | 1 | 0   | 0   | 38 | 21 | 0  | 0  | 0   | 0   | 1  | 0   |
|                                                                                                                                                                                                                              | 14 | 0   | 0 | 0  | 1   | 5  | 24 | 7 | 10 | 14 | 4  | 0  | 0 | 24 | 0 | 10  | 0  | 3 | 37  | 0   | 0  | 9  | 19 | 71 | 9   | 0   | 0  |     |
| M02255_77_000000000-ADUT3_1_1108_10666_19330 T---AC---AG-AG-GGT-----GCA-A-G-----C--G--T---T--AA-T-CGG-AA-----TT-A--C-T--GG-GC-----GT--A----AA-GG-GA-GC-----G-TA-G-G-T-G-----G--C-TC-T-A-T-----                               |    |     |   |    |     |    |    |   |    |    |    |    |   |    |   |     |    |   |     |     |    |    |    |    |     |     |    |     |
| -----AA---G-T-C-A-----G-A-T-G-TG--A-AA-TC--C-C-CG-G-G-----CT-T-AA-----C-C-T-G-G-G-A--A-C---T-G--C-A--T--C-----T--GA-A-A--C-----T--G-T--AG--A-G-C---T-A-G-A-G-T-A--T-GT----GA-G-A-----G-G-A-A--GG-T-----AG--A--ATT---C-C-     |    |     |   |    |     |    |    |   |    |    |    |    |   |    |   |     |    |   |     |     |    |    |    |    |     |     |    |     |
| C-A-G-GT--GT-A-G-CG-GT--G---A--A-A---TG-C-GT-AG--AG-A-TC--T-G--G-A-G-G-A-AT-A-CC---GA--T--G--GC-GAA-G--G-C-A-----G--C-C-T-T---CTG--G--CA-T-A-----A-T---A-C-T--GA--CA-C-T-G--A-GG--C-T-CG-A--AA-G-C---G-TG--GG-T-             |    |     |   |    |     |    |    |   |    |    |    |    |   |    |   |     |    |   |     |     |    |    |    |    |     |     |    |     |
| -AG-C-A-AA-----CA--GG Bacteria(100);Proteobacteria(100);Gammaproteobacteria(100);Pseudomonadales(100);Moraxellaceae(100);Psychrobacter(100);unclassified(100);unclassified(100);unclassified(100);                           |    |     |   |    |     |    |    |   |    |    |    |    |   |    |   |     |    |   |     |     |    |    |    |    |     |     |    |     |
| Otu0162                                                                                                                                                                                                                      | 0  | 12  | 0 | 0  | 199 | 0  | 7  | 1 | 0  | 0  | 0  | 0  | 0 | 2  | 0 | 0   | 0  | 0 | 0   | 2   | 4  | 2  | 8  | 0  | 0   | 0   | 0  | 0   |
|                                                                                                                                                                                                                              | 1  | 0   | 0 | 0  | 0   | 0  | 0  | 0 | 0  | 15 | 2  | 0  | 0 | 69 | 0 | 16  | 0  | 0 | 0   | 0   | 0  | 0  | 0  | 0  | 0   | 0   | 0  | 0   |
|                                                                                                                                                                                                                              | 0  | 0   | 0 | 5  | 0   | 0  | 0  | 0 | 0  | 0  | 8  | 0  | 0 | 0  | 5 | 0   | 34 | 0 | 0   | 0   | 28 | 0  | 0  | 0  | 0   | 0   | 0  | 0   |
|                                                                                                                                                                                                                              | 0  | 0   | 0 | 3  | 0   | 0  | 0  | 0 | 0  | 0  | 0  | 23 | 2 | 11 | 0 | 121 | 0  | 9 | 27  | 0   | 0  | 0  | 0  | 0  | 9   | 234 | 27 |     |
| M02255_76_000000000-ADUNE_1_1106_27842_12513 .....AC---T-AC-GT-----GCC-A-G-----C--A--G---C--CG-C-GGT-AA-----TA-C--G-T--AG-GT-----GG--C----AA---GC-G-----T-TA-T-C-C-G-----G--T-AA-A-A-T-----                                  |    |     |   |    |     |    |    |   |    |    |    |    |   |    |   |     |    |   |     |     |    |    |    |    |     |     |    |     |
| AA---G-T-C-T-----G-A-T--G-TG--A-AA-GC--C-C-CC-G-G-----CT-C-AA-----C-C-G-G-G-G-A--G-----G-GT-C-A---T--T-----G--GA-A-A--C-----T--G-T--TT--T-A-C---T-T-G-A-G-T-A--C-AG-----AA-G-A-----G-G-A-G--AG-T-----GG--A--ATT---C-C-A-     |    |     |   |    |     |    |    |   |    |    |    |    |   |    |   |     |    |   |     |     |    |    |    |    |     |     |    |     |
| T-GT--GT-A-G-CG-GT--G---A--A-A---TG-C-GC-AG--AG-A-TA--T-G--G-A-G-G-A-AC-A-CC---AG--T--G--GC-GAA-G--G-C--G-----G--C-T-C-T---CTG--G--TC-T-G-----T-A---A-C-T--GA--CG-C-T-G--A-GG--T-G-CG-A--AA-G-C---G-TG--GG-G--               |    |     |   |    |     |    |    |   |    |    |    |    |   |    |   |     |    |   |     |     |    |    |    |    |     |     |    |     |
| AT-C-A-AA-----CA--GG Bacteria(100);Firmicutes(100);Bacilli(100);Bacillales(100);Staphylococcaceae(100);unclassified(100);unclassified(100);unclassified(100);unclassified(100);                                              |    |     |   |    |     |    |    |   |    |    |    |    |   |    |   |     |    |   |     |     |    |    |    |    |     |     |    |     |
| Otu0163                                                                                                                                                                                                                      | 0  | 0   | 0 | 0  | 0   | 0  | 0  | 0 | 0  | 0  | 0  | 0  | 0 | 0  | 0 | 0   | 0  | 0 | 0   | 0   | 0  | 0  | 1  | 0  | 0   | 10  | 0  | 934 |
|                                                                                                                                                                                                                              | 31 | 0   | 3 | 0  | 0   | 1  | 0  | 0 | 0  | 5  | 17 | 0  | 0 | 0  | 1 | 0   | 67 | 0 | 162 | 326 | 0  | 0  | 0  | 0  | 0   | 0   | 0  | 0   |
|                                                                                                                                                                                                                              | 0  | 0   | 0 | 0  | 0   | 0  | 0  | 0 | 0  | 0  | 0  | 0  | 0 | 0  | 0 | 1   | 0  | 0 | 0   | 0   | 9  | 47 | 0  | 0  | 0   | 0   | 0  | 0   |
|                                                                                                                                                                                                                              | 0  | 0   | 0 | 0  | 0   | 0  | 0  | 0 | 0  | 0  | 0  | 0  | 0 | 0  | 0 | 0   | 0  | 0 | 0   | 0   | 0  | 0  | 0  | 0  | 199 | 0   | 0  |     |
| M02255_77_000000000-ADUT3_1_2111_12397_17424 T---AC---GT-AT-GTC-----GCA-A-G-----C--G--T---T--AT-C-CGG-AA-----TT-A--T-T--GG-GC-----GT--A----AA-GC-GA-GT-----C-TA-G-G-C-G-----G--C-TT-G-T-T-----                               |    |     |   |    |     |    |    |   |    |    |    |    |   |    |   |     |    |   |     |     |    |    |    |    |     |     |    |     |
| ----AA---G-T-C-A-----G-A-T--G-TG--A-AA-AT--G-C-GG-G-G-----CT-C-AA-----C-T-C-C-G-T-A--T-----T-G--C-G---T--T-----T--GA-T-A--C-----T--G-G--CA--G-G-C---T-A-G-A-G-T-A--C-TG-----GA-G-A-----G-G-T-G---GG-C-----GG--A--ACT---A-    |    |     |   |    |     |    |    |   |    |    |    |    |   |    |   |     |    |   |     |     |    |    |    |    |     |     |    |     |
| C-A-A-GT--GT-A-G-AG-GT--G---A--A-A---TT-C-GT-AG--AT-A-TT--T-G--T-A-G-G-A-AT-G-CC---GA--T--A--GT-GAA-G--A-C-A-----G--C-T-C-A---CTG--G--AC-A-G-----A-T---A-C-T--GA--CG-C-T-A--A-AG--C-T-CG-A--AA-G-C---G-TG--GG-G--            |    |     |   |    |     |    |    |   |    |    |    |    |   |    |   |     |    |   |     |     |    |    |    |    |     |     |    |     |
| AG-C-A-AA-----CA--GG Bacteria(100);Fusobacteria(100);Fusobacteria(100);Fusobacteriales(100);Fusobacteriaceae(100);Psychrilyobacter(100);unclassified(100);unclassified(100);unclassified(100);                               |    |     |   |    |     |    |    |   |    |    |    |    |   |    |   |     |    |   |     |     |    |    |    |    |     |     |    |     |
| Otu0164                                                                                                                                                                                                                      | 0  | 0   | 0 | 0  | 0   | 0  | 0  | 0 | 0  | 0  | 0  | 0  | 0 | 0  | 0 | 0   | 0  | 0 | 0   | 0   | 0  | 0  | 0  | 0  | 0   | 2   | 0  | 0   |
|                                                                                                                                                                                                                              | 0  | 0   | 0 | 0  | 0   | 0  | 0  | 0 | 0  | 0  | 0  | 83 | 0 | 0  | 0 | 0   | 0  | 0 | 0   | 0   | 0  | 0  | 0  | 0  | 0   | 0   | 0  | 0   |
|                                                                                                                                                                                                                              | 0  | 0   | 0 | 0  | 0   | 0  | 0  | 0 | 0  | 0  | 0  | 0  | 0 | 0  | 0 | 98  | 62 | 0 | 0   | 0   | 0  | 0  | 0  | 0  | 0   | 0   | 0  | 0   |
|                                                                                                                                                                                                                              | 0  | 136 | 0 | 0  | 114 | 0  | 0  | 0 | 0  | 0  | 0  | 0  | 0 | 0  | 0 | 0   | 0  | 0 | 0   | 0   | 0  | 0  | 0  | 0  | 0   | 0   |    |     |
| M02255_77_000000000-ADUT3_1_1105_24566_11451 T---AC---GG-AG-GGG-----GCT-A-G-----C--G--T---T--GT-T-CGG-AA-----AT-A--C-T--GG-GC-----GT--A----AA-GC-GA-AC-----G-TA-G-G-C-G-----G--C-TT-A-G-C----                                |    |     |   |    |     |    |    |   |    |    |    |    |   |    |   |     |    |   |     |     |    |    |    |    |     |     |    |     |
| -----AA---G-T-C-A-----G-G-G--G-TG--A-AA-TC--C-C-GG-A-G-----CT-C-AA-----C-T-C-C-G-G-A--A-C---T-G--C-C---C--T-----T--GA-A-A--C-----T--G-C--TT--C-G-C---T-T-G-A-A-T--C---C-TG-----GA-G-A-----G-G-C-G---AG-T-----GG--A--ATT---C- |    |     |   |    |     |    |    |   |    |    |    |    |   |    |   |     |    |   |     |     |    |    |    |    |     |     |    |     |
| C-G-A-GT--GT-A-G-AG-GT--G---A--A-A---TT-C-GT-AG--AT-A-TT--C-G--G-A-A-G-A-AC-A-CC---AG--T--G--GC-GAA-G--G-C--G-----A--C-T-C-G---CTG--G--AC-A-G-----G-T---A-T-T--GA--CG-C-T-G--A-GG--T-T-CG-A--AA-G-C---G-TG--GG-G--           |    |     |   |    |     |    |    |   |    |    |    |    |   |    |   |     |    |   |     |     |    |    |    |    |     |     |    |     |
| -AG-C-A-AA-----CA--GG Bacteria(100);Proteobacteria(100);Alphaproteobacteria(100);Sphingomonadales(73);Erythrobacteraceae(67);unclassified;unclassified;unclassified;unclassified;                                            |    |     |   |    |     |    |    |   |    |    |    |    |   |    |   |     |    |   |     |     |    |    |    |    |     |     |    |     |



[illegible]



|         |                                                                                                                                                                                                                                                                                                                                                                                                                                                                                                                                                                                                                                                                                                                                                                                                         |     |     |    |     |     |     |    |     |     |    |    |   |    |   |    |    |     |     |    |    |    |    |     |   |    |    |   |
|---------|---------------------------------------------------------------------------------------------------------------------------------------------------------------------------------------------------------------------------------------------------------------------------------------------------------------------------------------------------------------------------------------------------------------------------------------------------------------------------------------------------------------------------------------------------------------------------------------------------------------------------------------------------------------------------------------------------------------------------------------------------------------------------------------------------------|-----|-----|----|-----|-----|-----|----|-----|-----|----|----|---|----|---|----|----|-----|-----|----|----|----|----|-----|---|----|----|---|
| Otu0170 | 0                                                                                                                                                                                                                                                                                                                                                                                                                                                                                                                                                                                                                                                                                                                                                                                                       | 0   | 0   | 46 | 0   | 0   | 0   | 0  | 0   | 0   | 0  | 0  | 0 | 0  | 0 | 0  | 0  | 0   | 0   | 1  | 6  | 0  | 0  | 0   | 0 | 4  | 0  | 0 |
|         | 0                                                                                                                                                                                                                                                                                                                                                                                                                                                                                                                                                                                                                                                                                                                                                                                                       | 1   | 0   | 0  | 0   | 0   | 0   | 0  | 34  | 0   | 0  | 91 | 0 | 0  | 0 | 0  | 0  | 0   | 0   | 0  | 0  | 29 | 0  | 19  | 0 | 0  | 0  |   |
|         | 0                                                                                                                                                                                                                                                                                                                                                                                                                                                                                                                                                                                                                                                                                                                                                                                                       | 0   | 0   | 0  | 0   | 0   | 0   | 0  | 0   | 0   | 0  | 3  | 0 | 9  | 0 | 0  | 0  | 0   | 0   | 0  | 0  | 0  | 0  | 0   | 0 | 0  | 0  |   |
|         | 0                                                                                                                                                                                                                                                                                                                                                                                                                                                                                                                                                                                                                                                                                                                                                                                                       | 0   | 0   | 0  | 39  | 0   | 0   | 0  | 0   | 0   | 0  | 0  | 0 | 0  | 0 | 0  | 0  | 0   | 0   | 0  | 0  | 0  | 0  | 0   | 0 | 0  | 0  |   |
|         | M02255_77_000000000-ADUT3_1_1101_26653_16641 T---AC--GT-AG-GTG-----GCA-A-G----C-G-T--T--GT-C-CGG-AT-----TT-A-C-T-GG-GC-----GT-A---AA-GC-GA-AC-----G-CA-G-G-C-G-----G-A-CT-G-T-T-----AA---G-T-A-G-----A-A-A-G--TG--A-AA-GG--T-C-GG-A-G----CT-C-AA-----C-T-C-C-A-A-C--A-T---T-G--C-T--T-T-----C--TA-T-A--C-----T-G-G--CA-G-T-C---T-T-G-A-G-T-A--G-CG----GA-G-A-----G-G-A-A--GG-G-----GG-A--ACG---A-C-A-C-GT--GT-A-G-CG-GT--G---A--A-A--TG-C-GT-TG--AT-A-TG--T-G--T-C-G-G-A-AC-A-CC---CA--T-G--GC-GAA-A-G-C-A-----C-C-C-T-T--CTG--G--AC-G-C-----A-A---A-C-T-GA--CG-C-T-C--A-GG--T-T-CG-A-AA-G-C---C-AA--GG-T--AG-C-G-AA-----CA--GG Bacteria(100);unclassified(100);unclassified(100);unclassified(100);unclassified(100);unclassified(100);unclassified(100);unclassified(100);unclassified(100);          |     |     |    |     |     |     |    |     |     |    |    |   |    |   |    |    |     |     |    |    |    |    |     |   |    |    |   |
| Otu0171 | 0                                                                                                                                                                                                                                                                                                                                                                                                                                                                                                                                                                                                                                                                                                                                                                                                       | 0   | 0   | 0  | 0   | 0   | 0   | 0  | 0   | 0   | 0  | 0  | 2 | 1  | 0 | 0  | 3  | 0   | 0   | 0  | 0  | 0  | 0  | 0   | 0 | 0  | 0  |   |
|         | 0                                                                                                                                                                                                                                                                                                                                                                                                                                                                                                                                                                                                                                                                                                                                                                                                       | 0   | 0   | 0  | 0   | 0   | 0   | 0  | 0   | 0   | 0  | 0  | 0 | 0  | 0 | 0  | 3  | 0   | 0   | 0  | 0  | 0  | 0  | 0   | 0 | 0  | 0  |   |
|         | 0                                                                                                                                                                                                                                                                                                                                                                                                                                                                                                                                                                                                                                                                                                                                                                                                       | 1   | 0   | 0  | 0   | 0   | 5   | 0  | 8   | 0   | 1  | 0  | 0 | 0  | 0 | 0  | 0  | 0   | 0   | 0  | 0  | 0  | 0  | 0   | 0 | 0  | 0  |   |
|         | 0                                                                                                                                                                                                                                                                                                                                                                                                                                                                                                                                                                                                                                                                                                                                                                                                       | 0   | 0   | 0  | 0   | 0   | 0   | 3  | 0   | 4   | 0  | 5  | 0 | 0  | 2 | 0  | 0  | 0   | 0   | 0  | 0  | 0  | 0  | 0   | 0 | 0  | 0  |   |
|         | M02255_76_000000000-ADUNE_1_2115_10176_21100 T---AA--GC-AC-CGG-----CTA-A-C----T-C-T--G--TG-C-CAG-CA-----GC-C--G-C-GG-TA-----AT-A---CA-GA-GG-GT-----G-CA-A-G-C-G-----T--TAAT-C-G-G-----AA---G-T-T-G-----G-A-T-G--TG--A-AA-TC--C-C-CG-G-G----CT-C-AA-----C-C-T-G-G-G-A-A-C---T-G--C-A--T-T-----C--AA-A-A--C-----T-G-T-CG--A-G-C---T-A-G-A-G-T-A--T-GG---TA-G-A-----G-G-G-T--GG-T-----GG-A--ATT---T-C-C-T-GT--GT-A-G-CG-GT--G---A--A-A--TG-C-GT-AG--AT-A-TA-G-G--A-A-G-G-A-AC-A-CC---AG--T-G--GC-GAA-G-G-C-G-----A-C-C-A-C---CTG--G--AC-T-G-----A-T--A-C-T-GA--CA-C-T-G--A-GG--T-G-CG-A-AA-G-C---G-TG--GG-G--AG-C-A-AA-----CA--GG Bacteria(100);Proteobacteria(100);Gammaproteobacteria(100);Pseudomonadales(87);Pseudomonadaceae(87);unclassified(87);unclassified(87);unclassified(87);unclassified(87); |     |     |    |     |     |     |    |     |     |    |    |   |    |   |    |    |     |     |    |    |    |    |     |   |    |    |   |
| Otu0172 | 0                                                                                                                                                                                                                                                                                                                                                                                                                                                                                                                                                                                                                                                                                                                                                                                                       | 0   | 0   | 72 | 108 | 35  | 1   | 58 | 66  | 105 | 0  | 0  | 0 | 0  | 0 | 1  | 0  | 0   | 0   | 5  | 0  | 0  | 0  | 0   | 0 | 0  | 10 |   |
|         | 1                                                                                                                                                                                                                                                                                                                                                                                                                                                                                                                                                                                                                                                                                                                                                                                                       | 0   | 42  | 0  | 0   | 137 | 24  | 48 | 0   | 0   | 0  | 54 | 0 | 95 | 0 | 0  | 0  | 5   | 0   | 0  | 7  | 0  | 6  | 0   | 0 | 0  |    |   |
|         | 0                                                                                                                                                                                                                                                                                                                                                                                                                                                                                                                                                                                                                                                                                                                                                                                                       | 482 | 0   | 0  | 0   | 0   | 46  | 0  | 0   | 0   | 0  | 0  | 3 | 0  | 0 | 19 | 0  | 0   | 0   | 1  | 0  | 35 | 49 | 0   | 0 | 31 |    |   |
|         | 0                                                                                                                                                                                                                                                                                                                                                                                                                                                                                                                                                                                                                                                                                                                                                                                                       | 204 | 98  | 98 | 0   | 0   | 0   | 0  | 112 | 0   | 0  | 0  | 0 | 0  | 0 | 0  | 0  | 116 | 115 | 63 | 73 | 2  | 0  | 0   | 0 | 0  |    |   |
|         | M02255_77_000000000-ADUT3_1_1103_23192_17625 T---AC--GT-AT-GTC-----GCA-A-G----C-G-T--T--AT-C-CGG-AA-----TT-A-T-T-GG-GC-----AT-A---AA-GG-GC-AT-----C-TA-G-G-C-G-----G--C-CA-G-A-T-----AA---G-T-C-T-----G-G-G--G--TG--A-AA-AC--T-T-GC-G-G----CT-C-AA-----C-C-G-C-A-A-G--C-C---T-G--C-C--C-T-----G--GA-A-A--C-----T-A-T-GC--G-G-C---T-A-G-A-G-T-A--C-TG---GA-G-A-----G-G-T-G--GA-C-----GG-A--ACT---G-C-A-C-GA--GT-A-G-AG-GT--G---A--A-A--TT-C-GT-AG--AT-A-TG--T-G--C-A-G-G-A-AT-G-CC---GA--T-G--AT-GAA-G-A-T-A-----G--T-T-C-A---CTG--G--AC-G-G-----T-A--A-C-T-GA--CA-C-T-G--A-GG--T-G-CG-A-AA-G-C---T-AG--GG-G--AG-C-A-AA-----CA--GG Bacteria(100);Fusobacteria(100);Fusobacteria(100);Fusobacteriales(100);Leptotrichiaceae(100);Leptotrichia(100);unclassified(100);unclassified(100);unclassified(100); |     |     |    |     |     |     |    |     |     |    |    |   |    |   |    |    |     |     |    |    |    |    |     |   |    |    |   |
| Otu0173 | 0                                                                                                                                                                                                                                                                                                                                                                                                                                                                                                                                                                                                                                                                                                                                                                                                       | 777 | 625 | 0  | 0   | 0   | 131 | 41 | 70  | 0   | 0  | 0  | 0 | 0  | 0 | 2  | 0  | 4   | 0   | 0  | 0  | 0  | 0  | 0   | 0 | 0  | 0  |   |
|         | 0                                                                                                                                                                                                                                                                                                                                                                                                                                                                                                                                                                                                                                                                                                                                                                                                       | 0   | 0   | 48 | 0   | 0   | 0   | 0  | 0   | 0   | 48 | 0  | 0 | 0  | 0 | 0  | 0  | 0   | 0   | 0  | 0  | 0  | 0  | 0   | 0 | 0  | 0  |   |
|         | 0                                                                                                                                                                                                                                                                                                                                                                                                                                                                                                                                                                                                                                                                                                                                                                                                       | 0   | 0   | 0  | 0   | 0   | 0   | 0  | 0   | 0   | 0  | 0  | 0 | 0  | 0 | 24 | 30 | 0   | 0   | 0  | 0  | 0  | 0  | 0   | 0 | 0  | 0  |   |
|         | 0                                                                                                                                                                                                                                                                                                                                                                                                                                                                                                                                                                                                                                                                                                                                                                                                       | 0   | 0   | 0  | 0   | 0   | 0   | 0  | 0   | 0   | 0  | 0  | 0 | 0  | 0 | 0  | 0  | 0   | 0   | 0  | 0  | 0  | 9  | 183 | 0 | 0  | 0  |   |
|         | M02255_77_000000000-ADUT3_1_1101_7841_14070 T---AC--GT-AT-GGA-----GCA-A-G----C-G-T--T--AT-C-CGG-AT-----TT-A-C-T                                                                                                                                                                                                                                                                                                                                                                                                                                                                                                                                                                                                                                                                                         |     |     |    |     |     |     |    |     |     |    |    |   |    |   |    |    |     |     |    |    |    |    |     |   |    |    |   |



|         |                                                                                                                                                                                                                                                                                                                                                                                                                                                                                                                                                                                                                                                                                                                                                                                                                              |     |     |     |    |   |     |     |     |   |     |     |    |    |    |    |     |    |    |    |    |     |     |     |     |    |   |   |
|---------|------------------------------------------------------------------------------------------------------------------------------------------------------------------------------------------------------------------------------------------------------------------------------------------------------------------------------------------------------------------------------------------------------------------------------------------------------------------------------------------------------------------------------------------------------------------------------------------------------------------------------------------------------------------------------------------------------------------------------------------------------------------------------------------------------------------------------|-----|-----|-----|----|---|-----|-----|-----|---|-----|-----|----|----|----|----|-----|----|----|----|----|-----|-----|-----|-----|----|---|---|
| Otu0175 | 0                                                                                                                                                                                                                                                                                                                                                                                                                                                                                                                                                                                                                                                                                                                                                                                                                            | 200 | 214 | 224 | 0  | 0 | 176 | 338 | 177 | 0 | 0   | 0   | 0  | 0  | 0  | 4  | 0   | 0  | 0  | 0  | 0  | 0   | 5   | 0   | 6   | 4  | 2 |   |
|         | 4                                                                                                                                                                                                                                                                                                                                                                                                                                                                                                                                                                                                                                                                                                                                                                                                                            | 0   | 0   | 1   | 0  | 0 | 81  | 144 | 0   | 0 | 221 | 0   | 0  | 95 | 0  | 0  | 0   | 0  | 58 | 0  | 0  | 0   | 83  | 30  | 0   | 0  | 0 |   |
|         | 0                                                                                                                                                                                                                                                                                                                                                                                                                                                                                                                                                                                                                                                                                                                                                                                                                            | 0   | 0   | 0   | 0  | 0 | 0   | 0   | 0   | 0 | 0   | 10  | 0  | 17 | 0  | 16 | 152 | 0  | 0  | 0  | 2  | 0   | 0   | 0   | 0   | 0  |   |   |
|         | 0                                                                                                                                                                                                                                                                                                                                                                                                                                                                                                                                                                                                                                                                                                                                                                                                                            | 0   | 121 | 10  | 0  | 0 | 0   | 1   | 0   | 0 | 0   | 0   | 0  | 0  | 0  | 0  | 0   | 18 | 0  | 0  | 0  | 0   | 24  | 322 | 691 | 0  |   |   |
|         | M02255_77_000000000-ADUT3_1_1104_21315_13830 T---AC--GT-AG-GTG-----GCG-A-G-----C-G--T---T-GT-C-CGG-AT-----TT-A--C-T-GG-GC-----GT--A----AA-GG-GA-GC-----G-TA-G-G-C-G-----G--A-CT-T-T-T-----AA---G-T-G-A-----G-A-T-G--TG--A-AA-TA--C-C-CG-G-G-----CT-C-AA-----C-T-T-G-G-G-T--G-C---T-G--C-A--T-T-----T--CA-A-A--C-----T--G-G--AA-G-T-C---T-A-G-A-G-T-G--C-AG-----GA-G-A-----G-G-A-G--AA-T-----GG--A--ATT---C-C-T-A-GT--GT-A-G-CG-GT--G--A--A-A--TG-C-GT-AG--AG-A-TT--A-G--G-A-A-G-A-AC-A-CC--AG--T--G--GC-GAA-G--G-C-G-----A-T-T-C-T---CTG--G--AC-T-G-----T-A--A-C-T-GA--CG-C-T-G--A-GG--C-T-CG-A--AA-G-C--G-TG--GG-G--AG-C-A-AA-----CA--GG Bacteria(100);Firmicutes(100);Clostridia(100);Clostridiales(100);Clostridiaceae(100);unclassified(68);unclassified(68);unclassified(68);unclassified(68);                          |     |     |     |    |   |     |     |     |   |     |     |    |    |    |    |     |    |    |    |    |     |     |     |     |    |   |   |
| Otu0176 | 0                                                                                                                                                                                                                                                                                                                                                                                                                                                                                                                                                                                                                                                                                                                                                                                                                            | 0   | 0   | 0   | 0  | 1 | 0   | 0   | 36  | 0 | 0   | 2   | 0  | 10 | 0  | 0  | 3   | 0  | 9  | 0  | 0  | 0   | 69  | 8   | 8   | 0  | 0 | 0 |
|         | 0                                                                                                                                                                                                                                                                                                                                                                                                                                                                                                                                                                                                                                                                                                                                                                                                                            | 0   | 0   | 0   | 0  | 0 | 18  | 0   | 0   | 1 | 18  | 502 | 69 | 4  | 0  | 0  | 0   | 0  | 24 | 0  | 0  | 115 | 253 | 450 | 17  | 30 | 0 | 0 |
|         | 41                                                                                                                                                                                                                                                                                                                                                                                                                                                                                                                                                                                                                                                                                                                                                                                                                           | 6   | 0   | 6   | 15 | 0 | 27  | 0   | 2   | 0 | 6   | 27  | 0  | 0  | 39 | 19 | 0   | 0  | 0  | 0  | 13 | 14  | 0   | 220 | 0   | 0  | 0 | 0 |
|         | 0                                                                                                                                                                                                                                                                                                                                                                                                                                                                                                                                                                                                                                                                                                                                                                                                                            | 0   | 1   | 0   | 0  | 0 | 0   | 0   | 0   | 0 | 0   | 0   | 0  | 0  | 34 | 88 | 0   | 6  | 0  | 0  | 0  | 0   | 2   | 4   | 20  | 0  |   |   |
|         | M02255_77_000000000-ADUT3_1_2102_5819_10302 T---AC--GG-GG-GGG-----GCA-A-G-----T-G--T---T-AT-T-CGG-AA-----TG-A--C-T-GG-GC-----GT--A----AA-GG-GC-AC-----G-TA-G-G-C-G-----G--T-GA-A-A-A-----GG---G-T-G-G-----A-A-A--G--TG--A-AA-GT--C-G-CC-A-A-----AA-C-A-----C-T-G-G-C-G-G--G-G---T-G--C-T---T-T-----C--TT-G-A--C-----C--A-T-TT--C-A-C---T-T-G-A-G-T-G--A-GA-----TA-G-G-----G-G-A-G--AG-T-----GG--A--ATT---T-C-G-T-GT--GG-A-G-GG-AT--C--A-A-A--TC-C-TA-AG--AT-A-TA--C-G--A-A-G-G-A-AC-G-CC--AA--C--C--GC-GAA-G--G-C-A-----G--C-T-C-T---CTG--G--GT-C-C-----C-C--A-C-T-GA--CG-C-T-G--G-GG--T-G-CG-A--AA-G-C--A-TG--GG-G--AG-C-A-AA-----CA--GG Bacteria(100);unclassified(100);unclassified(100);unclassified(100);unclassified(100);unclassified(100);unclassified(100);unclassified(100);unclassified(100);                     |     |     |     |    |   |     |     |     |   |     |     |    |    |    |    |     |    |    |    |    |     |     |     |     |    |   |   |
| Otu0177 | 0                                                                                                                                                                                                                                                                                                                                                                                                                                                                                                                                                                                                                                                                                                                                                                                                                            | 0   | 0   | 0   | 0  | 0 | 0   | 0   | 0   | 0 | 0   | 0   | 0  | 0  | 0  | 0  | 0   | 0  | 0  | 0  | 0  | 0   | 12  | 0   | 6   | 0  | 0 |   |
|         | 0                                                                                                                                                                                                                                                                                                                                                                                                                                                                                                                                                                                                                                                                                                                                                                                                                            | 0   | 71  | 0   | 0  | 0 | 19  | 0   | 0   | 0 | 0   | 0   | 0  | 0  | 0  | 0  | 0   | 0  | 0  | 0  | 0  | 0   | 7   | 0   | 0   | 0  | 0 |   |
|         | 0                                                                                                                                                                                                                                                                                                                                                                                                                                                                                                                                                                                                                                                                                                                                                                                                                            | 0   | 0   | 0   | 0  | 0 | 0   | 0   | 0   | 0 | 3   | 0   | 0  | 0  | 0  | 0  | 0   | 0  | 0  | 0  | 7  | 0   | 0   | 0   | 0   | 0  | 0 |   |
|         | 0                                                                                                                                                                                                                                                                                                                                                                                                                                                                                                                                                                                                                                                                                                                                                                                                                            | 0   | 0   | 0   | 0  | 0 | 0   | 0   | 0   | 0 | 0   | 0   | 0  | 0  | 0  | 0  | 0   | 0  | 0  | 0  | 0  | 4   | 0   | 0   | 0   |    |   |   |
|         | M02255_77_000000000-ADUT3_1_2119_19041_14313 T---AC--GG-AG-GGG-----GCT-A-G-----C-G--T---T-GT-T-CGG-AA-----TT-A--C-T-GG-GC-----GT--A----AA-GC-GC-AC-----G-TA-G-G-C-G-----G--A-TT-G-G-A-----AA---G-T-T-G-----G-G-G--G--TG--A-AA-TC--C-C-GG-G-G-----CT-C-AA-----C-C-C-C-G-G-A-A-C---T-G--C-C---T-T-----C--AA-A-A--C-----T--C-C--CA--G-T-C---T-G-G-A-G-G--T--C-GA-----GA-G-A-----G-G-T-G--AG-T-----GG--A--ATT---C-C-G-A-GT--GT-A-G-AG-GT--G--A--A-A--TT-C-GT-AG--AT-A-TT--C-G--G-A-G-G-A-AC-A-CC--AG--T--G--GC-GAA-G--G-C-G-----G--C-T-C-A---CTG--G--CT-C-G-----A-T--A-C-T-GA--CG-C-T-G--A-GG--T-G-CG-A--AA-G-C--G-TG--GG-G--AG-C-A-AA-----CA--GG Bacteria(100);Proteobacteria(100);Alphaproteobacteria(100);Rhodobacterales(100);Rhodobacteraceae(100);unclassified(100);unclassified(100);unclassified(100);unclassified(100); |     |     |     |    |   |     |     |     |   |     |     |    |    |    |    |     |    |    |    |    |     |     |     |     |    |   |   |
| Otu0178 | 11                                                                                                                                                                                                                                                                                                                                                                                                                                                                                                                                                                                                                                                                                                                                                                                                                           | 20  | 0   | 0   | 32 | 0 | 6   | 31  | 2   | 0 | 0   | 0   | 0  | 0  | 0  | 2  | 0   | 0  | 0  | 0  | 3  | 9   | 0   | 0   | 0   | 1  | 3 |   |
|         | 0                                                                                                                                                                                                                                                                                                                                                                                                                                                                                                                                                                                                                                                                                                                                                                                                                            | 0   | 5   | 60  | 0  | 0 | 0   | 0   | 0   | 9 | 1   | 53  | 17 | 46 | 3  | 0  | 0   | 0  | 9  | 0  | 0  | 15  | 5   | 178 | 0   | 0  | 0 |   |
|         | 0                                                                                                                                                                                                                                                                                                                                                                                                                                                                                                                                                                                                                                                                                                                                                                                                                            | 0   | 0   | 0   | 0  | 3 | 5   | 0   | 0   | 0 | 0   | 0   | 0  | 11 | 26 | 0  | 30  | 0  | 0  | 0  | 0  | 0   | 4   | 0   | 0   | 0  | 0 |   |
|         | 1                                                                                                                                                                                                                                                                                                                                                                                                                                                                                                                                                                                                                                                                                                                                                                                                                            | 9   | 4   | 64  | 0  | 0 | 0   | 0   | 9   | 0 | 0   | 0   | 0  | 0  | 0  | 17 | 5   | 12 | 7  | 26 | 81 | 5   | 0   | 9   | 0   | 19 |   |   |
|         | M02255_77_000000000-ADUT3                                                                                                                                                                                                                                                                                                                                                                                                                                                                                                                                                                                                                                                                                                                                                                                                    |     |     |     |    |   |     |     |     |   |     |     |    |    |    |    |     |    |    |    |    |     |     |     |     |    |   |   |



|                                                                                                                                                                                                                      |     |    |     |    |     |    |     |     |     |    |    |     |    |     |     |     |     |    |   |    |    |    |    |    |     |     |     |    |    |
|----------------------------------------------------------------------------------------------------------------------------------------------------------------------------------------------------------------------|-----|----|-----|----|-----|----|-----|-----|-----|----|----|-----|----|-----|-----|-----|-----|----|---|----|----|----|----|----|-----|-----|-----|----|----|
| Otu0180                                                                                                                                                                                                              | 0   | 0  | 0   | 0  | 0   | 0  | 0   | 0   | 0   | 0  | 0  | 0   | 1  | 7   | 0   | 8   | 0   | 10 | 0 | 0  | 0  | 12 | 4  | 0  | 0   | 0   | 0   | 0  |    |
|                                                                                                                                                                                                                      | 0   | 0  | 0   | 0  | 0   | 0  | 0   | 0   | 0   | 0  | 0  | 0   | 0  | 0   | 0   | 0   | 0   | 0  | 8 | 0  | 0  | 0  | 10 | 0  | 0   | 0   | 0   | 5  | 0  |
|                                                                                                                                                                                                                      | 0   | 0  | 0   | 5  | 1   | 1  | 2   | 2   | 3   | 4  | 0  | 1   | 4  | 1   | 0   | 0   | 0   | 0  | 0 | 0  | 0  | 0  | 0  | 0  | 0   | 0   | 0   | 0  | 0  |
|                                                                                                                                                                                                                      | 0   | 0  | 0   | 0  | 0   | 2  | 1   | 0   | 0   | 0  | 0  | 0   | 0  | 0   | 0   | 0   | 0   | 0  | 0 | 0  | 0  | 0  | 0  | 0  | 0   | 0   | 0   | 0  | 0  |
| M02255_76_000000000-ADUNE_1_2101_26528_17478                                                                                                                                                                         |     |    |     |    |     |    |     |     |     |    |    |     |    |     |     |     |     |    |   |    |    |    |    |    |     |     |     |    |    |
| G---AC---AG-AA-TAA-----GCA-C-C-----G-G-C---T-AA--C-T-CT-----GT-G--C-C-AG-CA-----GC-C---GC-GG-TA-AT-----A-CA-G-A-G-G-----G-T-TG-T-C-A-----                                                                            |     |    |     |    |     |    |     |     |     |    |    |     |    |     |     |     |     |    |   |    |    |    |    |    |     |     |     |    |    |
| ---AG---C-G-T-T-----A-A-T--C--GG--A-AA-TC--C-C-CG-G-G----CT-C-AA-----C-C-T-G-G-G-A-A-C---T-G--C-A--T-C-----C-AA-A-A--C-----T-G-G--CA-A-G-C---T-A-G-A-G-T-A--T-GG----TA-G-A-----G-G-G-T--AG-T-----GG--A--ATT---T-     |     |    |     |    |     |    |     |     |     |    |    |     |    |     |     |     |     |    |   |    |    |    |    |    |     |     |     |    |    |
| C-C-T-GT--GT-A-G-CG-GT--G---A-A-A---TG-C-GT-AG--AT-A-TA-G-G--A-A-G-G-A-AC-A-CC---AG--T-G--GC-GAA-G--G-C-G-----A-C-T-A-C---CTG--G--AC-T-G-----A-T--A-C-T-GA-CA-C-T-G--A-GG--T-G-CG-A-AA-G-C--G-TG--GG-                |     |    |     |    |     |    |     |     |     |    |    |     |    |     |     |     |     |    |   |    |    |    |    |    |     |     |     |    |    |
| G--AG-C-A-AA-----CA--GG                                                                                                                                                                                              |     |    |     |    |     |    |     |     |     |    |    |     |    |     |     |     |     |    |   |    |    |    |    |    |     |     |     |    |    |
| Bacteria(100);Proteobacteria(100);Gammaproteobacteria(100);unclassified(100);unclassified(100);unclassified(100);unclassified(100);unclassified(100);unclassified(100);                                              |     |    |     |    |     |    |     |     |     |    |    |     |    |     |     |     |     |    |   |    |    |    |    |    |     |     |     |    |    |
| Otu0181                                                                                                                                                                                                              | 215 | 0  | 0   | 0  | 227 | 43 | 0   | 0   | 0   | 0  | 0  | 0   | 0  | 0   | 0   | 0   | 0   | 0  | 0 | 0  | 25 | 1  | 0  | 0  | 5   | 5   | 0   | 0  |    |
|                                                                                                                                                                                                                      | 0   | 0  | 45  | 1  | 0   | 27 | 0   | 464 | 308 | 45 | 74 | 26  | 0  | 113 | 198 | 116 | 1   | 26 | 0 | 52 | 0  | 0  | 8  | 41 | 194 | 0   | 0   | 0  | 0  |
|                                                                                                                                                                                                                      | 0   | 26 | 39  | 0  | 12  | 22 | 0   | 0   | 21  | 7  | 0  | 0   | 0  | 0   | 14  | 48  | 190 | 34 | 0 | 0  | 0  | 0  | 11 | 0  | 474 | 0   | 0   | 0  | 30 |
|                                                                                                                                                                                                                      | 0   | 48 | 0   | 4  | 0   | 96 | 0   | 0   | 0   | 0  | 2  | 0   | 0  | 144 | 0   | 48  | 28  | 43 | 0 | 39 | 0  | 0  | 0  | 0  | 0   | 0   | 0   | 39 |    |
| M02255_77_000000000-ADUT3_1_1103_7434_8208                                                                                                                                                                           |     |    |     |    |     |    |     |     |     |    |    |     |    |     |     |     |     |    |   |    |    |    |    |    |     |     |     |    |    |
| T---AC---GG-AG-GGA-----GCT-A-G-----C-G-T---T--AT-T-CGG-AA-----TT-A-C-T--GG-GC-----GT-A---AA-GC-GC-AC-----G-TA-G-G-C-G-----G--C-TT-T-G-T-----AA-                                                                      |     |    |     |    |     |    |     |     |     |    |    |     |    |     |     |     |     |    |   |    |    |    |    |    |     |     |     |    |    |
| ---G-T-A-A-----G-A-G--G--TG--A-AA-GC--C-C-AG-A-G----CT-C-AA-----C-T-C-T-G-G-A-A-T---T-G--C-C---T-T-----T-TA-G-A--C-----T-G-C--AT--C-G-C---T-T-G-A-A-T-C---A-TG---GA-G-A-----G-G-T-C--AG-T-----GG--A--ATT---C-C-G-A-  |     |    |     |    |     |    |     |     |     |    |    |     |    |     |     |     |     |    |   |    |    |    |    |    |     |     |     |    |    |
| GT--GT-A-G-AG-GT--G---A-A-A---TT-C-GT-AG--AT-A-TT--C-G--G-A-A-G-A-AC-A-CC---AG--T-G--GC-GAA-G--G-C-G-----G-C-T-G-A---CTG--G--AC-A-T-----G-T--A-T-T-GA--CG-C-T-G--A-GG--T-G-CG-A-AA-G-C--G-TG--GG-G--AG-              |     |    |     |    |     |    |     |     |     |    |    |     |    |     |     |     |     |    |   |    |    |    |    |    |     |     |     |    |    |
| C-A-AA-----CA--GG                                                                                                                                                                                                    |     |    |     |    |     |    |     |     |     |    |    |     |    |     |     |     |     |    |   |    |    |    |    |    |     |     |     |    |    |
| Bacteria(100);Proteobacteria(100);Alphaproteobacteria(100);Sphingomonadales(100);Sphingomonadaceae(94);Sphingomonas(94);unclassified(94);unclassified(94);unclassified(94);                                          |     |    |     |    |     |    |     |     |     |    |    |     |    |     |     |     |     |    |   |    |    |    |    |    |     |     |     |    |    |
| Otu0182                                                                                                                                                                                                              | 0   | 0  | 0   | 0  | 4   | 0  | 0   | 0   | 0   | 3  | 0  | 0   | 0  | 0   | 0   | 0   | 0   | 0  | 0 | 0  | 0  | 0  | 6  | 0  | 0   | 0   | 0   | 0  | 0  |
|                                                                                                                                                                                                                      | 0   | 3  | 0   | 10 | 0   | 0  | 0   | 0   | 0   | 0  | 0  | 0   | 0  | 2   | 0   | 0   | 0   | 0  | 0 | 0  | 0  | 10 | 0  | 0  | 0   | 0   | 0   | 0  | 27 |
|                                                                                                                                                                                                                      | 2   | 0  | 0   | 0  | 0   | 0  | 0   | 0   | 0   | 0  | 0  | 0   | 0  | 0   | 0   | 0   | 6   | 0  | 0 | 1  | 0  | 0  | 0  | 1  | 1   | 39  | 0   | 0  | 0  |
|                                                                                                                                                                                                                      | 0   | 0  | 0   | 0  | 0   | 0  | 0   | 0   | 0   | 0  | 0  | 0   | 0  | 0   | 0   | 0   | 0   | 0  | 0 | 0  | 0  | 0  | 0  | 0  | 0   | 9   | 0   |    |    |
| M02255_76_000000000-ADUNE_1_1115_5985_17887                                                                                                                                                                          |     |    |     |    |     |    |     |     |     |    |    |     |    |     |     |     |     |    |   |    |    |    |    |    |     |     |     |    |    |
| T---AA---GC-AC-CGG-----CTA-A-C-----T--A-C---G--TG-C-CAG-CA-----GC-C-G-C--GG-TA-----AT--A---CG-TA-GG-GT-----G-CG-A-G-C-G-----G--T-TA-TCG-G-----                                                                       |     |    |     |    |     |    |     |     |     |    |    |     |    |     |     |     |     |    |   |    |    |    |    |    |     |     |     |    |    |
| AA---G-A-C-A-----G-A-T--G--TG--A-AA-TC--C-C-CG-G-G----CT-C-AA-----C-C-T-G-G-G-A-A-C---T-G--C-A--T-T-----T--GT-G-A--C-----T-G-C--AT--G-G-C---T-A-G-A-G-T-A--C-GG---TA-G-A-----G-G-G-G---GA-T-----GG--A--ATT---C-C-G-  |     |    |     |    |     |    |     |     |     |    |    |     |    |     |     |     |     |    |   |    |    |    |    |    |     |     |     |    |    |
| C-GT--GT-A-G-CA-GT--G---A-A-A---TG-C-GT-AG--AT-A-TG--C-G--G-A-G-G-A-AC-A-CC---GA--T-G--GC-GAA-G--G-C-A-----A--T-C-C-C---CTG--G--AC-C-T-----G-T--A-C-T-GA--CG-C-T-C--A-TG--C-A-CG-A-AA-G-C--G-TG--GG-G--AG-           |     |    |     |    |     |    |     |     |     |    |    |     |    |     |     |     |     |    |   |    |    |    |    |    |     |     |     |    |    |
| C-A-AA-----CA--GG                                                                                                                                                                                                    |     |    |     |    |     |    |     |     |     |    |    |     |    |     |     |     |     |    |   |    |    |    |    |    |     |     |     |    |    |
| Bacteria(100);Proteobacteria(100);Betaproteobacteria(100);Burkholderiales(100);Comamonadaceae(100);unclassified(100);unclassified(100);unclassified(100);unclassified(100);                                          |     |    |     |    |     |    |     |     |     |    |    |     |    |     |     |     |     |    |   |    |    |    |    |    |     |     |     |    |    |
| Otu0183                                                                                                                                                                                                              | 0   | 11 | 355 | 0  | 0   | 0  | 161 | 10  | 225 | 0  | 0  | 0   | 0  | 0   | 0   | 0   | 0   | 0  | 0 | 0  | 0  | 0  | 1  | 0  | 0   | 0   | 4   | 0  | 0  |
|                                                                                                                                                                                                                      | 0   | 0  | 0   | 1  | 0   | 0  | 0   | 0   | 0   | 0  | 0  | 189 | 0  | 49  | 0   | 39  | 4   | 0  | 0 | 0  | 0  | 0  | 0  | 0  | 0   | 0   | 0   | 0  | 0  |
|                                                                                                                                                                                                                      | 0   | 0  | 0   | 0  | 0   | 0  | 3   | 0   | 0   | 0  | 0  | 2   | 0  | 0   | 0   | 0   | 49  | 50 | 0 | 0  | 0  | 0  | 0  | 0  | 0   | 318 | 716 | 0  | 0  |
|                                                                                                                                                                                                                      | 0   | 0  | 0   | 0  | 0   | 0  | 1   | 0   | 0   | 25 | 0  | 352 | 0  | 0   | 0   | 0   | 0   | 0  | 0 | 0  | 0  | 0  | 0  | 0  | 0   | 88  | 0   | 0  |    |
| M02255_77_000000000-ADUT3_1_2109_17769_19714                                                                                                                                                                         |     |    |     |    |     |    |     |     |     |    |    |     |    |     |     |     |     |    |   |    |    |    |    |    |     |     |     |    |    |
| T---AC---GT-AT-GGT-----GCA-A-G-----C-G-T---T--AT-C-CGG-AT-----TT-A-C-T--GG-GT-----GT-A---AA-GG-GA-GC-----G-TA-G-A-C-G-----G--A-GT-G-G-C-----                                                                         |     |    |     |    |     |    |     |     |     |    |    |     |    |     |     |     |     |    |   |    |    |    |    |    |     |     |     |    |    |
| -----AA---G-T-C-T-----G-A-T--G--TG--A-AA-AC--C-C-GG-G-G----CT-C-AA-----C-C-C-C-G-G-G--A-C---T-G--C-A--T-T-----G--GA-A-A--C-----T-G-T--CA--A-T-C---T-A-G-A-G-T-A--C-CG---GA-G-A-----G-G-T-A--AG-C-----GG--A--ATT---C- |     |    |     |    |     |    |     |     |     |    |    |     |    |     |     |     |     |    |   |    |    |    |    |    |     |     |     |    |    |
| C-T-A-GT--GT-A-G-CG-GT--G---A-A-A---TG-C-GT-AG--AT-A-TT--A-G--G-A-G-G-A-AC-A-CC---AG--T-G--GC-GAA-G--G-C-G-----G--C-T-T-A---CTG--G--AC-G-G-----T-A---A-C-T-GA--CG-T-T-G--A-GG--C-T-CG-A-AA-G-C--G-TG--GG-            |     |    |     |    |     |    |     |     |     |    |    |     |    |     |     |     |     |    |   |    |    |    |    |    |     |     |     |    |    |
| G--AG-C-A-AA-----CA--GG                                                                                                                                                                                              |     |    |     |    |     |    |     |     |     |    |    |     |    |     |     |     |     |    |   |    |    |    |    |    |     |     |     |    |    |
| Bacteria(100);Firmicutes(100);Clostridia(100);Clostridiales(100);Lachnospiraceae(100);unclassified(69);unclassified(69);unclassified(69);unclassified(69);                                                           |     |    |     |    |     |    |     |     |     |    |    |     |    |     |     |     |     |    |   |    |    |    |    |    |     |     |     |    |    |
| Otu0184                                                                                                                                                                                                              | 0   | 0  | 0   | 0  | 0   | 0  | 0   | 0   | 0   | 0  | 0  | 0   | 0  | 0   | 0   | 0   | 0   | 0  | 0 | 0  | 0  | 0  | 0  | 0  | 0   | 0   | 0   | 0  | 0  |
|                                                                                                                                                                                                                      | 0   | 0  | 0   | 0  | 0   | 0  | 47  | 0   | 0   | 0  | 0  | 0   | 82 | 0   | 0   | 0   | 0   | 0  | 0 | 0  | 0  | 0  | 3  | 0  | 0   | 0   | 0   | 17 | 0  |
|                                                                                                                                                                                                                      | 0   | 0  | 0   | 0  | 0   | 2  | 0   | 0   | 0   | 0  | 0  | 0   | 0  | 0   | 0   | 0   | 31  | 0  | 0 | 0  | 0  | 0  | 0  | 0  | 0   | 0   | 0   | 11 | 0  |
|                                                                                                                                                                                                                      | 0   | 0  | 0   | 0  | 0   | 0  | 0   | 0   | 0   | 0  | 0  | 0   | 1  | 0   | 0   | 0   | 0   | 0  | 0 | 0  | 0  | 0  | 0  | 0  | 0   | 0   | 0   | 0  |    |
| M02255_77_000000000-ADUT3_1_1101_24662_14467                                                                                                                                                                         |     |    |     |    |     |    |     |     |     |    |    |     |    |     |     |     |     |    |   |    |    |    |    |    |     |     |     |    |    |
| T---AC---GA-AG-GGG-----GCT-A-G-----C--G--T---T-GT-T-CGG-AA-----TT-A--C-T--GG-GC-----GT--A---AA-GC-GC-AC-----G-TA-G-G-C-G-----G--A-TT-G-T-T-----                                                                      |     |    |     |    |     |    |     |     |     |    |    |     |    |     |     |     |     |    |   |    |    |    |    |    |     |     |     |    |    |
| -----AA---G-T-T-A-----G-G-G--G--TG--A-AA-TC--C-C-AG-G-G----CT-C-AA-----C-C-C-T-G-G-A-A-C---T-G--C-C---T-T-----T-AA-T-A--C-----T-G-G--CA--A-T-C---T-C-G-A-G-T-C---C-GA---GA-G-A-----G-G-T-G--AG-T-----GG--A--ATT---C- |     |    |     |    |     |    |     |     |     |    |    |     |    |     |     |     |     |    |   |    |    |    |    |    |     |     |     |    |    |
| C-G-A-GT--GT-A-G-AG-GT--G---A-A-A---TT-C-GT-AG--AT-A-TT--C-G--G-A-G-G-A-AC-A-CC---AG--T-G--GC-GAA-G--G-C-G-----G--C-T-C-A---CTG--G--CT-C-G-----G-T--A-C-T-GA--CG-C-T-G--A-GG--T-G-CG-A-AA-G-C--G-TG--GG-             |     |    |     |    |     |    |     |     |     |    |    |     |    |     |     |     |     |    |   |    |    |    |    |    |     |     |     |    |    |
| G--AG-C-A-AA-----CA--GG                                                                                                                                                                                              |     |    |     |    |     |    |     |     |     |    |    |     |    |     |     |     |     |    |   |    |    |    |    |    |     |     |     |    |    |
| Bacteria(100);Proteobacteria(100);Alphaproteobacteria(100);Rhizobiales(100);Phyllobacteriaceae(100);Mesorhizobium(54);unclassified(54);unclassified(54);unclassified(54);                                            |     |    |     |    |     |    |     |     |     |    |    |     |    |     |     |     |     |    |   |    |    |    |    |    |     |     |     |    |    |



|                                                                                                                                                                                                                                                                                                                                                                                                                                                                                                                                                                                                                                                                                                                                                                                                                                                                   |     |    |    |     |    |    |    |    |    |    |    |   |    |     |     |     |     |    |    |     |    |    |    |    |      |   |   |
|-------------------------------------------------------------------------------------------------------------------------------------------------------------------------------------------------------------------------------------------------------------------------------------------------------------------------------------------------------------------------------------------------------------------------------------------------------------------------------------------------------------------------------------------------------------------------------------------------------------------------------------------------------------------------------------------------------------------------------------------------------------------------------------------------------------------------------------------------------------------|-----|----|----|-----|----|----|----|----|----|----|----|---|----|-----|-----|-----|-----|----|----|-----|----|----|----|----|------|---|---|
| Otu0185                                                                                                                                                                                                                                                                                                                                                                                                                                                                                                                                                                                                                                                                                                                                                                                                                                                           | 0   | 0  | 0  | 0   | 0  | 0  | 34 | 0  | 0  | 0  | 0  | 0 | 0  | 0   | 0   | 0   | 0   | 0  | 0  | 0   | 0  | 0  | 0  | 0  | 0    | 0 | 0 |
|                                                                                                                                                                                                                                                                                                                                                                                                                                                                                                                                                                                                                                                                                                                                                                                                                                                                   | 0   | 0  | 0  | 0   | 0  | 0  | 0  | 0  | 0  | 0  | 0  | 0 | 0  | 0   | 0   | 0   | 0   | 0  | 0  | 0   | 0  | 0  | 0  | 0  | 0    | 0 | 0 |
|                                                                                                                                                                                                                                                                                                                                                                                                                                                                                                                                                                                                                                                                                                                                                                                                                                                                   | 0   | 0  | 3  | 0   | 0  | 0  | 0  | 0  | 0  | 0  | 0  | 0 | 0  | 0   | 154 | 202 | 0   | 0  | 0  | 0   | 0  | 0  | 3  | 0  | 0    | 0 | 0 |
|                                                                                                                                                                                                                                                                                                                                                                                                                                                                                                                                                                                                                                                                                                                                                                                                                                                                   | 0   | 0  | 0  | 0   | 0  | 0  | 0  | 0  | 0  | 0  | 0  | 0 | 0  | 0   | 0   | 0   | 0   | 0  | 0  | 0   | 0  | 0  | 0  | 0  | 0    | 0 | 0 |
| M02255_77_000000000-ADUT3_1_1107_9624_21555 T---AC---GT-AG-GGG-----GCA-A-G-----C--G--T---T--AT-C-CGG-AA-----TT-A--C-T--GG-GC-----GT--A----AA-GG-GT-GC-----G-TA-G-G-C-G-----G--C-TT-G-T-T-----AA-<br>---G-T-C-A-----A-G-G--T--TA--A-AA-GG--C-A-GC-A-G----CT-C-AA-----C-T-G-C-T-G-T--T-----C-G--G-C--C--T-----T--GA-A-A--C-----T--A-A--TA--A-G-C---T-T-G-A-G-T--A---T-AG----GA-G-A-----G-G-A-A---AG-T-----GG--A--ATT---C-C-C-A-<br>GT--GT-A-G-CG-GT--G---A--A-A---TG-C-GT-AG--AT-A-TT--G-G--G-A-G-G-A-AT-A-CC---GG--T--G--GC-GAA-G--G-C-G-----A--C-T-T-T---CTG--G--AC-T-A-----A-A--A-C-T--GA--CG-C-T-G--A-GG--C-A-CG-A-AA-G-T---G-TG--GG-T--AG-C-<br>A-AA-----CA--GG     Bacteria(100);Firmicutes(100);Clostridia(100);Clostridiales(100);unclassified(81);unclassified(81);unclassified(81);unclassified(81);unclassified(81);                                     |     |    |    |     |    |    |    |    |    |    |    |   |    |     |     |     |     |    |    |     |    |    |    |    |      |   |   |
| Otu0186                                                                                                                                                                                                                                                                                                                                                                                                                                                                                                                                                                                                                                                                                                                                                                                                                                                           | 897 | 0  | 0  | 0   | 0  | 65 | 0  | 0  | 0  | 0  | 0  | 0 | 0  | 0   | 0   | 0   | 0   | 0  | 0  | 0   | 0  | 0  | 0  | 0  | 0    | 0 | 0 |
|                                                                                                                                                                                                                                                                                                                                                                                                                                                                                                                                                                                                                                                                                                                                                                                                                                                                   | 1   | 0  | 0  | 0   | 0  | 0  | 0  | 0  | 0  | 0  | 0  | 0 | 0  | 0   | 0   | 0   | 0   | 0  | 0  | 0   | 0  | 0  | 0  | 0  | 0    | 0 | 0 |
|                                                                                                                                                                                                                                                                                                                                                                                                                                                                                                                                                                                                                                                                                                                                                                                                                                                                   | 0   | 0  | 0  | 0   | 0  | 0  | 0  | 0  | 0  | 0  | 0  | 0 | 0  | 0   | 13  | 0   | 0   | 12 | 0  | 0   | 0  | 0  | 0  | 0  | 0    | 0 | 0 |
|                                                                                                                                                                                                                                                                                                                                                                                                                                                                                                                                                                                                                                                                                                                                                                                                                                                                   | 0   | 0  | 0  | 136 | 0  | 0  | 23 | 0  | 0  | 0  | 0  | 0 | 0  | 0   | 0   | 0   | 0   | 0  | 0  | 0   | 0  | 0  | 0  | 0  | 0    | 0 | 0 |
| M02255_77_000000000-ADUT3_1_1104_11355_9377 T---AC---GG-AG-GGG-----GCT-A-G-----C--G--T---T--GT-T-CGG-AA-----TT-A--C-T--GG-GC-----GT--A----AA-GC-GC-AC-----G-TA-G-G-C-G-----G--C-TT-T-G-T-----AA-<br>---G-T-T-A-----G-A-G--G--TG--A-AA-GC--C-T-GG-G-G----CT-C-AA-----C-T-C-C-A-G-A-A-T---T-G--C-C--T--T-----T--AA-G-A--C-----T--G-C--AT--C-G-C---T-T-G-A-A-T--C---G-CG----GA-G-A-----G-G-T-G---AG-T-----GG--A--ATT---C-C-G-A-<br>GT--GT-A-G-AG-GT--G---A--A-A---TT-C-GT-AG--AT-A-TT--C-G--G-A-A-G-A-AC-A-CC---AG--T--G--GC-GAA-G--G-C-G-----G--C-T-C-A---CTG--G--AC-G-C-----G-T--A-T-T--GA--CG-C-T-G--A-GG--T-G-CG-A-AA-G-C---G-TG--GG-G--AG-<br>C-A-AA-----CA--GG     Bacteria(100);Proteobacteria(100);Alphaproteobacteria(100);Sphingomonadales(100);Sphingomonadaceae(100);Sphingomonas(100);unclassified(100);unclassified(100);unclassified(100);            |     |    |    |     |    |    |    |    |    |    |    |   |    |     |     |     |     |    |    |     |    |    |    |    |      |   |   |
| Otu0187                                                                                                                                                                                                                                                                                                                                                                                                                                                                                                                                                                                                                                                                                                                                                                                                                                                           | 0   | 0  | 0  | 0   | 0  | 0  | 0  | 0  | 0  | 0  | 0  | 0 | 0  | 0   | 10  | 0   | 0   | 0  | 0  | 0   | 0  | 23 | 0  | 32 | 0    | 0 | 0 |
|                                                                                                                                                                                                                                                                                                                                                                                                                                                                                                                                                                                                                                                                                                                                                                                                                                                                   | 15  | 1  | 0  | 0   | 0  | 0  | 0  | 0  | 36 | 0  | 0  | 0 | 0  | 0   | 0   | 0   | 0   | 0  | 0  | 1   | 0  | 0  | 0  | 0  | 0    | 0 | 0 |
|                                                                                                                                                                                                                                                                                                                                                                                                                                                                                                                                                                                                                                                                                                                                                                                                                                                                   | 0   | 0  | 0  | 0   | 0  | 0  | 0  | 0  | 0  | 0  | 0  | 0 | 0  | 0   | 0   | 0   | 10  | 0  | 0  | 0   | 0  | 0  | 0  | 0  | 0    | 0 | 0 |
|                                                                                                                                                                                                                                                                                                                                                                                                                                                                                                                                                                                                                                                                                                                                                                                                                                                                   | 0   | 0  | 0  | 0   | 0  | 0  | 4  | 0  | 0  | 0  | 39 | 0 | 0  | 0   | 0   | 153 | 0   | 0  | 0  | 0   | 0  | 0  | 1  | 0  | 2394 | 0 | 0 |
| M02255_77_000000000-ADUT3_1_1105_18333_9839 T---AC---GA-AG-GGG-----GCT-A-G-----C--G--T---T--GT-T-CGG-AA-----TT-A--C-T--GG-GC-----GT--A----AA-GC-GC-AC-----G-TA-G-G-C-G-----G--A-TA-T-T-T-----AA-<br>---G-T-C-A-----G-G-G--G--TG--A-AA-TC--C-C-GG-G-G----CT-C-AA-----C-C-C-C-G-G-A--A-C---T-G--C-C--T--T-----T--GA-T-A--C-----T--G-G--GT--A-T-C---T-T-G-A-G-T--G---T-GG----TA-G-A-----G-G-T-G---AG-T-----GG--A--ATT---G-C-G-A-<br>GT--GT-A-G-AG-GT--G---A--A-A---TT-C-GT-AG--AT-A-TT--C-G--C-A-G-G-A-AC-A-CC---AG--T--G--GC-GAA-G--G-C-G-----G--C-T-C-A---CTG--G--AC-C-A-----C-A--A-C-T--GA--CG-C-T-G--A-GG--T-G-CG-A-AA-G-C---G-TG--GG-G--AG-<br>C-A-AA-----CA--GG     Bacteria(100);Proteobacteria(100);Alphaproteobacteria(100);Rhizobiales(100);unclassified(100);unclassified(100);unclassified(100);unclassified(100);unclassified(100);                     |     |    |    |     |    |    |    |    |    |    |    |   |    |     |     |     |     |    |    |     |    |    |    |    |      |   |   |
| Otu0188                                                                                                                                                                                                                                                                                                                                                                                                                                                                                                                                                                                                                                                                                                                                                                                                                                                           | 0   | 0  | 0  | 0   | 0  | 0  | 22 | 1  | 0  | 0  | 0  | 0 | 0  | 0   | 0   | 0   | 0   | 0  | 0  | 0   | 0  | 0  | 0  | 0  | 0    | 0 | 0 |
|                                                                                                                                                                                                                                                                                                                                                                                                                                                                                                                                                                                                                                                                                                                                                                                                                                                                   | 0   | 0  | 0  | 0   | 0  | 0  | 0  | 0  | 0  | 0  | 0  | 0 | 75 | 0   | 0   | 0   | 0   | 0  | 43 | 0   | 0  | 0  | 0  | 0  | 0    | 0 | 0 |
|                                                                                                                                                                                                                                                                                                                                                                                                                                                                                                                                                                                                                                                                                                                                                                                                                                                                   | 0   | 0  | 0  | 0   | 0  | 0  | 0  | 0  | 0  | 0  | 0  | 0 | 0  | 0   | 0   | 0   | 0   | 0  | 0  | 0   | 8  | 0  | 0  | 0  | 0    | 0 | 0 |
|                                                                                                                                                                                                                                                                                                                                                                                                                                                                                                                                                                                                                                                                                                                                                                                                                                                                   | 0   | 0  | 0  | 19  | 0  | 0  | 39 | 0  | 0  | 0  | 0  | 0 | 0  | 0   | 0   | 0   | 0   | 0  | 0  | 0   | 0  | 0  | 0  | 3  | 0    | 0 | 0 |
| M02255_77_000000000-ADUT3_1_1117_23919_3278 T---AC---GG-AG-GGA-----GCT-A-G-----C--G--T---T--GT-T-CGG-AA-----TT-A--C-T--GG-GC-----GT--A----AA-GC-GC-AC-----G-TA-G-G-C-G-----G--C-TA-C-T-C-----AA-<br>---G-T-C-A-----G-A-G--G--TG--A-AA-GC--C-C-GG-G-G----CT-C-AA-----C-C-C-C-G-G-A--A-C---T-G--C-C--T--T-----T--GA-A-A--C-----T--A-G--GT--G-G-C---T-A-G-A-A-T--C---T-TG----GA-G-A-----G-G-C-G---AG-T-----GG--A--ATT---C-C-G-A-<br>GT--GT-A-G-AG-GT--G---A--A-A---TT-C-GT-AG--AT-A-TT--C-G--G-A-A-G-A-AC-A-CC---AG--T--G--GC-GAA-G--G-C-G-----A--C-T-C-G---CTG--G--AC-A-A-----G-T--A-T-T--GA--CG-C-T-G--A-GG--T-G-CG-A-AA-G-C---G-TG--GG-G--AG-<br>C-A-AA-----CA--GG     Bacteria(100);Proteobacteria(100);Alphaproteobacteria(100);Sphingomonadales(100);Sphingomonadaceae(100);unclassified(100);unclassified(100);unclassified(100);unclassified(100);           |     |    |    |     |    |    |    |    |    |    |    |   |    |     |     |     |     |    |    |     |    |    |    |    |      |   |   |
| Otu0189                                                                                                                                                                                                                                                                                                                                                                                                                                                                                                                                                                                                                                                                                                                                                                                                                                                           | 0   | 0  | 0  | 38  | 0  | 0  | 0  | 0  | 0  | 0  | 0  | 0 | 0  | 0   | 0   | 0   | 0   | 0  | 0  | 4   | 0  | 0  | 65 | 7  | 0    | 0 | 0 |
|                                                                                                                                                                                                                                                                                                                                                                                                                                                                                                                                                                                                                                                                                                                                                                                                                                                                   | 0   | 0  | 2  | 0   | 0  | 0  | 0  | 0  | 7  | 30 | 0  | 0 | 0  | 149 | 432 | 0   | 162 | 6  | 0  | 0   | 0  | 0  | 37 | 14 | 0    | 0 | 0 |
|                                                                                                                                                                                                                                                                                                                                                                                                                                                                                                                                                                                                                                                                                                                                                                                                                                                                   | 332 | 31 | 93 | 25  | 36 | 41 | 77 | 27 | 16 | 25 | 45 | 0 | 31 | 32  | 82  | 69  | 124 | 0  | 72 | 177 | 17 | 0  | 0  | 0  | 0    | 0 | 0 |
|                                                                                                                                                                                                                                                                                                                                                                                                                                                                                                                                                                                                                                                                                                                                                                                                                                                                   | 0   | 0  | 0  | 0   | 0  | 0  | 4  | 0  | 0  | 0  | 0  | 0 | 0  | 0   | 0   | 86  | 0   | 0  | 0  | 0   | 0  | 0  | 0  | 0  | 0    | 0 | 0 |
| M02255_77_000000000-ADUT3_1_2111_19376_15802            T---AC---GA-AG-GGG-----GCT-A-G-----C--G--T---T--GC-T-CGG-AA-----TT-A--C-T--GG-GC-----GT--A----AA-GG-GC-GC-----G-TA-G-G-C-G-----G--A-CA-G-T-T---<br>-----AA---G-T-T-G-----G-G-G--G--TG--A-AA-GC--C-C-GG-G-G----CT-C-AA-----C-C-T-C-G-G-A--A-T---T-G--C-C--T--T-----C--AA-T-A--C-----T--G-G--CT--G-T-C---T-T-G-A-G-T--A---C-GG----GA-G-A-----G-G-T-G---AG-T-----GG--A--ACT---<br>C-C-G-A-GT--GT-A-G-AG-GT--G---A--A-A---TT-C-GT-AG--AT-A-TT--C-G--G-A-A-G-A-AC-A-CC---AG--T--G--GC-GAA-G--G-C-G-----A--C-T-C-A---CTG--G--CC-C-G-----T-T--A-C-T--GA--CG-C-T-G--A-GG--C-G-CG-A-AA-G-C---G-TG--GG-<br>G--AG-C-A-AA-----CA--GG     Bacteria(100);Proteobacteria(100);Alphaproteobacteria(100);Caulobacterales(100);Caulobacteraceae(100);uncultured(100);unclassified(100);unclassified(100);unclassified(100); |     |    |    |     |    |    |    |    |    |    |    |   |    |     |     |     |     |    |    |     |    |    |    |    |      |   |   |



|                                                                                                                                                                                                                                                                                                                                                                                                                                                                                                                                                                                                                                       |     |    |     |    |    |    |    |     |   |    |   |    |    |     |    |    |    |   |      |    |   |   |    |    |     |     |    |   |
|---------------------------------------------------------------------------------------------------------------------------------------------------------------------------------------------------------------------------------------------------------------------------------------------------------------------------------------------------------------------------------------------------------------------------------------------------------------------------------------------------------------------------------------------------------------------------------------------------------------------------------------|-----|----|-----|----|----|----|----|-----|---|----|---|----|----|-----|----|----|----|---|------|----|---|---|----|----|-----|-----|----|---|
| Otu0190                                                                                                                                                                                                                                                                                                                                                                                                                                                                                                                                                                                                                               | 0   | 0  | 0   | 0  | 0  | 0  | 0  | 0   | 0 | 0  | 0 | 0  | 0  | 0   | 0  | 0  | 0  | 0 | 0    | 0  | 0 | 0 | 0  | 0  | 0   | 0   | 0  |   |
|                                                                                                                                                                                                                                                                                                                                                                                                                                                                                                                                                                                                                                       | 0   | 0  | 0   | 0  | 0  | 0  | 0  | 0   | 0 | 0  | 0 | 0  | 0  | 0   | 0  | 0  | 0  | 0 | 0    | 0  | 0 | 0 | 0  | 0  | 0   | 0   | 0  |   |
|                                                                                                                                                                                                                                                                                                                                                                                                                                                                                                                                                                                                                                       | 0   | 0  | 0   | 0  | 0  | 0  | 0  | 0   | 0 | 0  | 0 | 0  | 0  | 0   | 0  | 0  | 0  | 0 | 0    | 0  | 0 | 0 | 0  | 0  | 0   | 340 | 16 |   |
|                                                                                                                                                                                                                                                                                                                                                                                                                                                                                                                                                                                                                                       | 0   | 0  | 0   | 0  | 0  | 0  | 0  | 0   | 0 | 0  | 0 | 0  | 0  | 0   | 0  | 0  | 0  | 0 | 0    | 0  | 0 | 0 | 0  | 0  | 0   | 0   | 0  |   |
| M02255_77_000000000-ADUT3_1_1106_23191_9858 C---GA---CT-AA-CTA-----TGT-G-C-----C-A-A-G---C-AG-T-CGC-GG-----TA-A-T-A-CA-TA-----G--G----TT-GC-AA-GC-----GTTA-T-C-C-G-----G-A-TT-A-A-T-----AA--G-T-C-T-----G-G-T-G--TT--A-AA-GG--C-A-AC-T-G-----CT-T-AA-----C-G-G-T-T-G-T-A-----T-G--C-A--T-T-----G--GA-A-A--C-----T-A-T-TA-G-T-C---T-A-G-A-G-T-G--T-GG----TA-G-G-----G-A-G-T--TC-T-----GG--A--ACT---C-C-A-T-GT--GG-A-G-CG-GT--G---G-A-A---TG-C-GT-AG--AT-A-TA--T-G--G-A-A-G-A-AC-A-CC--AG--T-G--GC-GAA-G-G-C-G-----A-G-A-A-C---TTA-G--GC-C-A-----T-T--A-C-T-GA-CG-C-T-T-A-GG--C-T-TG-A-AA-G-T--G-TG--GG-G--AG-C-A-AA-----TA--GG         |     |    |     |    |    |    |    |     |   |    |   |    |    |     |    |    |    |   |      |    |   |   |    |    |     |     |    |   |
| Bacteria(100);Firmicutes(98);unclassified(74);unclassified(74);unclassified(74);unclassified(74);unclassified(74);unclassified(74);                                                                                                                                                                                                                                                                                                                                                                                                                                                                                                   |     |    |     |    |    |    |    |     |   |    |   |    |    |     |    |    |    |   |      |    |   |   |    |    |     |     |    |   |
| Otu0191                                                                                                                                                                                                                                                                                                                                                                                                                                                                                                                                                                                                                               | 0   | 89 | 0   | 0  | 0  | 0  | 0  | 0   | 0 | 0  | 0 | 0  | 4  | 0   | 0  | 0  | 0  | 0 | 0    | 0  | 0 | 0 | 0  | 0  | 0   | 0   | 0  |   |
|                                                                                                                                                                                                                                                                                                                                                                                                                                                                                                                                                                                                                                       | 0   | 0  | 0   | 68 | 0  | 0  | 0  | 119 | 0 | 0  | 0 | 0  | 0  | 0   | 0  | 0  | 0  | 0 | 1039 | 0  | 0 | 0 | 0  | 0  | 0   | 0   | 0  |   |
|                                                                                                                                                                                                                                                                                                                                                                                                                                                                                                                                                                                                                                       | 58  | 0  | 0   | 0  | 0  | 0  | 0  | 0   | 0 | 0  | 0 | 0  | 0  | 0   | 0  | 0  | 0  | 0 | 8    | 0  | 0 | 0 | 0  | 0  | 0   | 0   | 0  |   |
|                                                                                                                                                                                                                                                                                                                                                                                                                                                                                                                                                                                                                                       | 0   | 0  | 13  | 0  | 33 | 0  | 0  | 0   | 0 | 0  | 0 | 0  | 0  | 0   | 0  | 0  | 0  | 0 | 0    | 0  | 0 | 9 | 6  | 0  | 0   | 0   | 0  |   |
| M02255_77_000000000-ADUT3_1_1103_11048_7963 T---AC---GT-AG-GGG-----GCA-A-G-----C-G--T---T-AT-C-CGG-AT-----TT-A-C-T-GG-GT-----GT-A---AA-GG-GA-GC-----G-TA-G-A-C-G-----G--T-TC-T-G-C-----AA---G-T-C-T-----G-G-A-G--TG--A-AA-GC--C-C-GG-G-G-----CT-C-AA-----C-C-C-C-G-G-G-A-C---T-G--C-T--T-T-----G--GA-A-A--C-----T-G-T-GG--G-A-C---T-A-G-A-G-T-G--C-AG---GA-G-A-----G-G-T-A--AG-T-----GG--A--ATT---C-C-T-A-GT--GT-A-G-CG-GT--G---A-A-A---TG-C-GT-AG--AT-A-TT--A-G--G-A-G-G-A-AC-A-CC--AG--T-G--GC-GAA-G-G-C-G-----G-C-T-T-A---CTG-G-AC-T-G-----T-A--A-C-T-GA-CG-T-T-G-A-GG--C-T-CG-A-AA-G-C---G-TG--GG-G--AG-C-A-AA-----CA--GG         |     |    |     |    |    |    |    |     |   |    |   |    |    |     |    |    |    |   |      |    |   |   |    |    |     |     |    |   |
| Bacteria(100);Firmicutes(100);Clostridia(100);Clostridiales(100);Lachnospiraceae(100);Incertae_Sedis(95);unclassified(95);unclassified(95);unclassified(95);                                                                                                                                                                                                                                                                                                                                                                                                                                                                          |     |    |     |    |    |    |    |     |   |    |   |    |    |     |    |    |    |   |      |    |   |   |    |    |     |     |    |   |
| Otu0192                                                                                                                                                                                                                                                                                                                                                                                                                                                                                                                                                                                                                               | 7   | 0  | 0   | 10 | 0  | 0  | 0  | 13  | 3 | 3  | 0 | 0  | 0  | 0   | 1  | 0  | 0  | 0 | 0    | 0  | 3 | 0 | 0  | 0  | 0   | 0   | 1  | 0 |
|                                                                                                                                                                                                                                                                                                                                                                                                                                                                                                                                                                                                                                       | 0   | 11 | 3   | 9  | 4  | 0  | 0  | 15  | 3 | 4  | 0 | 1  | 0  | 10  | 16 | 14 | 2  | 0 | 0    | 6  | 0 | 0 | 5  | 0  | 2   | 0   | 3  |   |
|                                                                                                                                                                                                                                                                                                                                                                                                                                                                                                                                                                                                                                       | 0   | 1  | 0   | 1  | 0  | 0  | 0  | 0   | 0 | 0  | 0 | 0  | 0  | 0   | 0  | 0  | 0  | 2 | 2    | 0  | 1 | 0 | 4  | 0  | 5   | 11  | 0  |   |
|                                                                                                                                                                                                                                                                                                                                                                                                                                                                                                                                                                                                                                       | 0   | 0  | 4   | 0  | 0  | 0  | 0  | 0   | 0 | 0  | 6 | 0  | 5  | 0   | 0  | 11 | 0  | 0 | 4    | 1  | 3 | 4 | 0  | 4  | 8   | 3   | 0  |   |
| M02255_77_000000000-ADUT3_1_1119_2603_15380 .....AC---T-AC-GT-----GCC-A-G-----C-A-A-G---C-CG-C-GGT-AA-----TA-C-G-T-AG-GT-----GG-C---AA-GC-GT-TA-----G---G-C-G-G-----A--A-TT-A-T-T-----AA---G-T-C-T-----G-A-T-G--TG--A-AA-GC--C-C-AC-G-G-----CT-C-AA-----C-C-G-T-G-G-A-G-----G-GT-C-A--T-T-----G--GA-A-A--C-----T-G-G-AA--A-A-C---T-T-G-A-G-T-G--C-AG---AA-G-A-----G-G-A-A--AG-T-----GG--A--ATT---C-C-A-T-GT--GT-A-G-CG-GT--G---A-A-A---TG-C-GC-AG--AG-A-TA--T-G--G-A-G-G-A-AC-A-CC--AG--T-G--GC-GAA-G-G-C-G-----A--C-T-T-T---CTG-G-TC-T-G-----T-A--A-C-T-GA-CG-C-T-G-A-TG--T-G-CG-A-AA-G-C---G-TG--GG-G--AT-C-A-AA-----CA--GG         |     |    |     |    |    |    |    |     |   |    |   |    |    |     |    |    |    |   |      |    |   |   |    |    |     |     |    |   |
| Bacteria(100);Firmicutes(100);Bacilli(100);Bacillales(100);Staphylococcaceae(91);Staphylococcus(84);unclassified(84);unclassified(84);unclassified(84);                                                                                                                                                                                                                                                                                                                                                                                                                                                                               |     |    |     |    |    |    |    |     |   |    |   |    |    |     |    |    |    |   |      |    |   |   |    |    |     |     |    |   |
| Otu0193                                                                                                                                                                                                                                                                                                                                                                                                                                                                                                                                                                                                                               | 0   | 0  | 117 | 29 | 0  | 0  | 18 | 0   | 0 | 0  | 0 | 0  | 0  | 0   | 0  | 0  | 3  | 0 | 0    | 0  | 0 | 0 | 0  | 0  | 0   | 2   | 0  |   |
|                                                                                                                                                                                                                                                                                                                                                                                                                                                                                                                                                                                                                                       | 0   | 0  | 0   | 1  | 0  | 0  | 39 | 0   | 0 | 32 | 0 | 0  | 0  | 199 | 48 | 0  | 0  | 0 | 0    | 19 | 0 | 0 | 14 | 12 | 0   | 0   | 1  |   |
|                                                                                                                                                                                                                                                                                                                                                                                                                                                                                                                                                                                                                                       | 0   | 0  | 0   | 0  | 0  | 0  | 0  | 0   | 0 | 0  | 0 | 0  | 0  | 0   | 0  | 0  | 0  | 0 | 0    | 0  | 0 | 0 | 0  | 52 | 0   | 0   |    |   |
|                                                                                                                                                                                                                                                                                                                                                                                                                                                                                                                                                                                                                                       | 579 | 15 | 0   | 0  | 0  | 29 | 0  | 0   | 0 | 0  | 0 | 0  | 21 | 0   | 0  | 0  | 0  | 0 | 0    | 0  | 0 | 0 | 0  | 0  | 0   | 0   | 0  |   |
| M02255_77_000000000-ADUT3_1_1117_18010_20262 T---AC---GT-AG-GGT-----ACG-A-G-----C-G--T---T-GT-C-CGG-AA-----TT-A--T-T-GG-GC-----GT-A---AA-GA-GC-TC-----G-TA-G-G-T-G-----G--T-TG-G-T-C-----AC---G-T-C-T-----G-C-T-G--TG--G-AA-AC--G-C-AA-C-G-----CT-T-AA-----C-G-T-T-G-C-G--C-G---T-G--C-A--G--T-----G--GG-T-A--C-----G--G-G-CT-G-A-C---T-A-G-A-G-T-G--C-AG---TA-G-G-----G-G-A-G---TC-T-----GG--A--ATT---C-C-T-G-GT--GT-A-G-CG-GT--G---A-A-A---TG-C-GC-AG--AT-A-TC--A-G--G-A-G-G-A-AC-A-CC--GG--T-G--GC-GAA-G-G-C-G-----G-G-A-C-T---CTG-G-GC-T-G-----T-A--A-C-T-GA--CA-C-T-G-A-GG--A-G-CG-A-AA-G-C---A-TG--GG-G--AG-C-G-AA-----CA--GG   |     |    |     |    |    |    |    |     |   |    |   |    |    |     |    |    |    |   |      |    |   |   |    |    |     |     |    |   |
| Bacteria(100);Actinobacteria(100);Actinobacteria(100);Actinobacteridae(100);Actinomycetales(100);Micrococcineae(100);Brevibacteriaceae(100);Brevibacterium(100);unclassified(100);                                                                                                                                                                                                                                                                                                                                                                                                                                                    |     |    |     |    |    |    |    |     |   |    |   |    |    |     |    |    |    |   |      |    |   |   |    |    |     |     |    |   |
| Otu0194                                                                                                                                                                                                                                                                                                                                                                                                                                                                                                                                                                                                                               | 0   | 0  | 0   | 0  | 0  | 0  | 0  | 0   | 0 | 0  | 0 | 0  | 0  | 0   | 3  | 0  | 0  | 0 | 0    | 0  | 0 | 0 | 9  | 0  | 0   | 0   | 0  |   |
|                                                                                                                                                                                                                                                                                                                                                                                                                                                                                                                                                                                                                                       | 0   | 1  | 0   | 0  | 0  | 0  | 2  | 34  | 0 | 0  | 0 | 11 | 6  | 2   | 0  | 0  | 23 | 0 | 2    | 0  | 0 | 0 | 2  | 6  | 0   | 0   | 0  |   |
|                                                                                                                                                                                                                                                                                                                                                                                                                                                                                                                                                                                                                                       | 3   | 5  | 1   | 0  | 0  | 0  | 0  | 1   | 3 | 0  | 0 | 0  | 2  | 5   | 0  | 17 | 0  | 0 | 26   | 0  | 0 | 0 | 0  | 0  | 108 | 116 | 0  |   |
|                                                                                                                                                                                                                                                                                                                                                                                                                                                                                                                                                                                                                                       | 0   | 0  | 0   | 0  | 7  | 0  | 0  | 0   | 6 | 0  | 7 | 0  | 0  | 0   | 0  | 0  | 0  | 0 | 0    | 0  | 0 | 0 | 0  | 0  | 0   | 3   | 0  |   |
| M02255_77_000000000-ADUT3_1_2116_22005_15107 T---AC---GT-AG-GGC-----GCA-A-G-----C-G--T---T-AT-C-CGG-AA-----TT-A--T-T-GG-GC-----GT-A---AA-GA-GC-TC-----G-TA-G-G-C-G-----G--T-TT-G-T-C-----GC---G-T-C-T-----G-C-T-G--TG--A-AA-TC--C-C-GA-G-G-----CT-C-AA-----C-C-T-C-G-G-G--C-C---T-G--C-A--G--T-----G--GG-T-A--C-----G--G-G-CA-G-A-C---T-A-G-A-G-T-G--C-GG---TA-G-G-----G-G-A-G---AT-T-----GG--A--ATT---C-C-T-G-GT--GT-A-G-CG-GT--G---G--A-A---TG-C-GC-AG--AT-A-TC--A-G--G-A-G-G-A-AC-A-CC--GA--T-G--GC-GAA-G-G-C-A-----G--A-T-C-T---CTG-G-GC-C-G-----T-A--A-C-T-GA--CG-C-T-G-A-GG--A-G-CG-A-AA-G-G---G-TG--GG-G--AG-C-A-AA-----CA--GG |     |    |     |    |    |    |    |     |   |    |   |    |    |     |    |    |    |   |      |    |   |   |    |    |     |     |    |   |
| Bacteria(100);Actinobacteria(100);Actinobacteria(100);Actinobacteridae(100);Actinomycetales(100);Micrococcineae(100);Microbacteriaceae(100);unclassified(81);unclassified(81);                                                                                                                                                                                                                                                                                                                                                                                                                                                        |     |    |     |    |    |    |    |     |   |    |   |    |    |     |    |    |    |   |      |    |   |   |    |    |     |     |    |   |



|         |                                                                                                                                                                                                                    |   |    |    |   |    |     |     |     |   |   |     |    |   |     |    |    |   |   |   |   |   |   |    |     |   |   |    |
|---------|--------------------------------------------------------------------------------------------------------------------------------------------------------------------------------------------------------------------|---|----|----|---|----|-----|-----|-----|---|---|-----|----|---|-----|----|----|---|---|---|---|---|---|----|-----|---|---|----|
| Otu0195 | 0                                                                                                                                                                                                                  | 0 | 0  | 0  | 0 | 0  | 0   | 0   | 0   | 0 | 0 | 0   | 0  | 0 | 0   | 0  | 0  | 0 | 0 | 0 | 0 | 0 | 0 | 0  | 0   | 5 | 2 |    |
|         | 0                                                                                                                                                                                                                  | 0 | 0  | 0  | 0 | 0  | 0   | 0   | 0   | 0 | 0 | 0   | 0  | 0 | 0   | 0  | 0  | 0 | 0 | 0 | 0 | 0 | 0 | 10 | 0   | 0 | 0 |    |
|         | 0                                                                                                                                                                                                                  | 0 | 0  | 0  | 0 | 0  | 0   | 0   | 0   | 0 | 0 | 11  | 0  | 0 | 0   | 13 | 0  | 0 | 0 | 0 | 0 | 0 | 0 | 51 | 0   | 0 | 0 |    |
|         | 0                                                                                                                                                                                                                  | 0 | 0  | 85 | 0 | 0  | 25  | 0   | 0   | 0 | 0 | 0   | 0  | 0 | 0   | 0  | 0  | 0 | 0 | 0 | 0 | 0 | 0 | 0  | 0   | 0 | 0 |    |
|         | M02255_77_000000000-ADUT3_1_1101_22087_11579 T---AC---GG-AG-GGG-----GCT-A-G-----C-G-T--T-GT-T-CGG-AA-----TT-A-C-T-GG-GC-----GT-A----AA-GC-GC-AC-----G-TA-G-G-C-G-----G-C-TT-G-G-T-----                             |   |    |    |   |    |     |     |     |   |   |     |    |   |     |    |    |   |   |   |   |   |   |    |     |   |   |    |
|         | -----AA---G-T-T-A-----G-A-G--G-TG--A-AA-GC--C-C-GG-G-G----CT-C-AA-----C-C-C-C-G-G-A-A-T---T-G--C-C---T-T-----T-AA-G-A--C-----T-G-C--CG--A-G-C---T-A-G-T-A-G--G--T-GA----GA-G-A-----G-G-T-G--AG-T-----GG-A--ATT---- |   |    |    |   |    |     |     |     |   |   |     |    |   |     |    |    |   |   |   |   |   |   |    |     |   |   |    |
|         | C-C-G-A-GT--GT-A-G-AG-GT--G--A-A-A---TT-C-GT-AG--AT-A-TT--C-G--G-A-A-G-A-AC-A-CC--AG--T-G--GC-GAA-G--G-C-G-----G-C-T-C-A---CTG--G--CT-C-A-----T-T--C-T-A-GA-CG-C-T-G--A-GG--T-G-CG-A-AA-G-C--G-TG--GG-             |   |    |    |   |    |     |     |     |   |   |     |    |   |     |    |    |   |   |   |   |   |   |    |     |   |   |    |
|         | G--AG-C-A-AA-----CA--GG Bacteria(100);Proteobacteria(100);Alphaproteobacteria(100);unclassified(98);unclassified(98);unclassified(98);unclassified(98);unclassified(98);unclassified(98);                          |   |    |    |   |    |     |     |     |   |   |     |    |   |     |    |    |   |   |   |   |   |   |    |     |   |   |    |
| Otu0196 | 0                                                                                                                                                                                                                  | 0 | 72 | 0  | 0 | 0  | 127 | 73  | 363 | 0 | 0 | 0   | 0  | 0 | 0   | 0  | 0  | 0 | 0 | 0 | 0 | 0 | 0 | 10 | 0   | 0 | 0 | 0  |
|         | 0                                                                                                                                                                                                                  | 0 | 0  | 0  | 0 | 95 | 0   | 0   | 0   | 0 | 0 | 237 | 0  | 0 | 107 | 0  | 0  | 1 | 0 | 0 | 0 | 0 | 0 | 0  | 0   | 0 | 0 |    |
|         | 0                                                                                                                                                                                                                  | 0 | 0  | 0  | 0 | 0  | 0   | 0   | 3   | 0 | 0 | 6   | 0  | 0 | 5   | 0  | 91 | 0 | 0 | 0 | 0 | 0 | 0 | 0  | 0   | 0 | 0 |    |
|         | 0                                                                                                                                                                                                                  | 0 | 0  | 0  | 0 | 0  | 0   | 0   | 0   | 0 | 0 | 0   | 0  | 0 | 0   | 0  | 0  | 0 | 0 | 0 | 0 | 0 | 0 | 8  | 102 | 0 | 0 |    |
|         | M02255_77_000000000-ADUT3_1_1103_13768_17099 A---AC---GT-AG-GGT-----GCA-A-G-----C-G--T--T-GT-C-CGG-AA-----TT-A-C-T-GG-GT-----GT--A----AA-GG-GA-GC-----G-CA-G-G-C-G-----G--A-CC-G-G-C-----                          |   |    |    |   |    |     |     |     |   |   |     |    |   |     |    |    |   |   |   |   |   |   |    |     |   |   |    |
|         | -----AA---G-T-T-G-----G-A-A--G-TG--A-AA-AC--T-A-TG-G-G----CT-C-AA-----C-C-C-A-T-A-A-A-T---T-G--C-T---T-T-----C-AA-A-A--C-----T-G-C--TG--G-C-C---T-T-G-A-G-T-A--G-TG---CA-G-A-----G-G-T-A--GG-T-----GG-A--ATT---C-  |   |    |    |   |    |     |     |     |   |   |     |    |   |     |    |    |   |   |   |   |   |   |    |     |   |   |    |
|         | C-C-G-GT--GT-A-G-CG-GT--G--G-A-A---TG-C-GT-AG--AT-A-TC--G-G--G-A-G-G-A-AC-A-CC--AG--T-G--GC-GAA-G--G-C-G-----A-C-C-T-A---CTG--G--GC-A-C-----C-A--A-C-T-GA-CG-C-T-G--A-GG--C-T-CG-A-AA-G-C--A-TG--GG-               |   |    |    |   |    |     |     |     |   |   |     |    |   |     |    |    |   |   |   |   |   |   |    |     |   |   |    |
|         | T--AG-C-A-AA-----CA--GG Bacteria(100);Firmicutes(100);Clostridia(100);Clostridiales(100);Ruminococcaceae(100);Subdoligranulum(100);unclassified(100);unclassified(100);unclassified(100);                          |   |    |    |   |    |     |     |     |   |   |     |    |   |     |    |    |   |   |   |   |   |   |    |     |   |   |    |
| Otu0197 | 0                                                                                                                                                                                                                  | 0 | 0  | 0  | 0 | 0  | 0   | 0   | 0   | 0 | 0 | 0   | 0  | 0 | 9   | 0  | 0  | 0 | 0 | 0 | 0 | 0 | 0 | 0  | 0   | 0 | 0 | 42 |
|         | 0                                                                                                                                                                                                                  | 0 | 0  | 0  | 0 | 0  | 0   | 162 | 0   | 0 | 0 | 59  | 0  | 0 | 0   | 0  | 0  | 0 | 0 | 0 | 0 | 0 | 0 | 0  | 0   | 0 | 0 |    |
|         | 0                                                                                                                                                                                                                  | 0 | 0  | 0  | 0 | 0  | 0   | 0   | 0   | 0 | 0 | 0   | 0  | 0 | 0   | 0  | 0  | 0 | 0 | 0 | 0 | 9 | 0 | 0  | 0   | 0 | 0 |    |
|         | 30                                                                                                                                                                                                                 | 0 | 0  | 0  | 0 | 0  | 0   | 0   | 28  | 0 | 0 | 0   | 33 | 0 | 0   | 0  | 0  | 0 | 0 | 0 | 0 | 0 | 0 | 0  | 0   | 0 | 0 |    |
|         | M02255_77_000000000-ADUT3_1_2112_16988_15998 T---AC---GA-AG-GGG-----GCT-A-G-----C-G--T--T-GT-T-CGG-AA-----TT-A-C-T-GG-GC-----GT--A----AA-GC-GC-AC-----G-TA-G-G-C-G-----G--A-TC-G-T-T-----                          |   |    |    |   |    |     |     |     |   |   |     |    |   |     |    |    |   |   |   |   |   |   |    |     |   |   |    |
|         | -----AA---G-T-T-A-----G-G-G--G-TG--A-AA-TC--C-C-AG-G-G----CT-C-AA-----C-C-C-T-G-G-A-A-C---T-G--C-C---T-C-----T-CA-T-A--C-----T-G-G--CG--A-T-C---T-C-G-A-G-T-T--C-GA---GA-G-A-----G-G-T-G--AG-T-----GG-A--ATT---C-  |   |    |    |   |    |     |     |     |   |   |     |    |   |     |    |    |   |   |   |   |   |   |    |     |   |   |    |
|         | C-G-A-GT--GT-A-G-AG-GT--G--A-A-A---TT-C-GT-AG--AT-A-TT--C-G--G-A-G-G-A-AC-A-CC--AG--T-G--GC-GAA-G--G-C-G-----G-C-T-C-A---CTG--G--GC-A-C-----A-C--A-C-T-GA-CG-C-T-G--A-GG--T-G-CG-A-AA-G-C--G-TG--GG-               |   |    |    |   |    |     |     |     |   |   |     |    |   |     |    |    |   |   |   |   |   |   |    |     |   |   |    |
|         | G--AG-C-A-AA-----CA--GG Bacteria(100);Proteobacteria(100);Alphaproteobacteria(100);Rhizobiales(100);Phyllobacteriaceae(61);unclassified(61);unclassified(61);unclassified(61);unclassified(61);                    |   |    |    |   |    |     |     |     |   |   |     |    |   |     |    |    |   |   |   |   |   |   |    |     |   |   |    |
| Otu0198 | 0                                                                                                                                                                                                                  | 0 | 0  | 0  | 0 | 0  | 0   | 0   | 0   | 0 | 0 | 0   | 4  | 0 | 1   | 0  | 1  | 1 | 0 | 0 | 0 | 0 | 0 | 0  | 0   | 0 | 0 | 0  |
|         | 0                                                                                                                                                                                                                  | 0 | 0  | 0  | 0 | 0  | 0   | 0   | 0   | 0 | 0 | 0   | 0  | 0 | 0   | 0  | 0  | 0 | 0 | 0 | 0 | 0 | 0 | 0  | 0   | 6 | 2 | 0  |
|         | 2                                                                                                                                                                                                                  | 0 | 1  | 0  | 0 | 0  | 2   | 1   | 0   | 1 | 0 | 0   | 3  | 0 | 0   | 0  | 0  | 0 | 0 | 0 | 0 | 0 | 0 | 0  | 0   | 0 | 0 |    |
|         | 0                                                                                                                                                                                                                  | 0 | 0  | 0  | 0 | 0  | 2   | 0   | 0   | 0 | 1 | 0   | 0  | 0 |     |    |    |   |   |   |   |   |   |    |     |   |   |    |



Otu0200 0 0 0 0 0 0 0 0 0 0 0 0 0 0 0 0 0 0 0 0 0 0 0 0 2 0 0 0  
0 0 0 4 0 0 0 0 0 0 0 2 0 0 0 7 0 0 0 0 0 0 0 0 0 0 0 0  
0 0 0 0 0 0 2 0 0 0 0 0 0 0 0 0 0 0 3 0 1 0 4 6 0 0 18 23  
19 3 14 0 5 0 0 1 0 13 0 0 0 0 0 0 0 0 2 0 0 0 0 0 0 0  
M02255\_76\_000000000-ADUNE\_1\_1112\_19861\_6338 TC---GC---AG-AA-TAA-----GCA-C-C-----G--G--C--T--AACT-CTG-TG-----CC-AG-C-A-GCC-GC-----GG--T----AA-TA-CA-GA-----G-GG-T-G-C-G-----A--G-CA-G-T-T-----  
GA---G-T-C-G-----G-A-T--G--TG--A-AA-TC--C-C-CG-A-G-----CT-T-AA-----C-T-T-G-G-G-A--A-T---T-G--C-A--T--T-----C--GA-T-A--C-----T--G-G--TT--A-G-C---T-A-G-A-G-T--G---T-GG----GA-G-A-----G-G-A-T--GG-T----AG--A--ATT---C-C-A-  
G-GT--GT-A-G-CG-GT--G---A--A--TG-C-GT-AG--AG-A-TC--T-G--G-A-G-G-A-AT-A-CC---GA--T--G--GC-GAA-G--G-C--A-----G--C-C-A-T---CTG--G--CC-T-A-----A-C---A-C-T--GA--CG-C-T-G--A-GG--T-A-CG-A--AA-G-C---A-TG--GG-G--  
AG-C-A-AA-----CA--GG Bacteria(100);Proteobacteria(100);Gammaproteobacteria(100);Pseudomonadales(100);Moraxellaceae(100);Acinetobacter(79);unclassified(79);unclassified(79);unclassified(79);

Otu0201 0 0 74 0 0 0 0 0 0 0 0 0 0 0 0 0 0 0 0 0 0 0 0 0 0 0 0 0  
0 0 0 0 0 0 0 0 0 0 0 37 0 0 0 0 0 0 0 0 0 0 0 6 0 0 0 0  
0 0 0 0 0 0 0 0 0 0 4 0 0 0 7 0 12 0 0 0 0 0 0 0 0 0 0 0  
0 0 0 1034 30 0 3 0 0 0 0 0 0 0 0 0 0 0 0 0 0 0 0 2 0 0 0  
M02255\_77\_000000000-ADUT3\_1\_1110\_20610\_12237 T---AC---GG-AG-GGG-----GCT-A-G-----C--G--T--T--GT-T-CGG-AA-----TT-A--C-T--GG-GC-----GT--A----AA-GC-GC-AC-----G-TA-G-G-C-G-----G--C-TT-T-G-T-----  
-----AA---G-T-T-A-----G-A-G--G--TG--A-AA-GC--C-C-GG-G-G----CT-C-AA-----C-C-C-C-G-G-A--A-T---T-G--C-C--T--T-----T--AA-G-A--C-----T--G-C--AG--A-G-C---T-A-G-C-A-G--G---T-GA----GA-G-A-----G-G-T-A--AG-T----GG--A--ATT---  
C-C-G-A-GT--GT-A-G-AG-GT--G---A--A--TT-C-GT-AG--AT-A-TT--C-G--G-A-A-G-A-AC-A-CC---AG--T--G--GC-GAA-G--G-C--G-----G--C-T-T-A---CTG--G--CT-C-A-----T-A--C-T-G--GA--CG-C-T-G--A-GG--T-G-CG-A--AA-G-C---G-TG--GG-  
G--AG-C-A-AA-----CA--GG Bacteria(100);Proteobacteria(100);Alphaproteobacteria(100);Sphingomonadales(100);Sphingomonadaceae(88);Sphingomonas(87);unclassified(87);unclassified(87);unclassified(87);

Otu0202 82 0 0 34 0 26 22 0 0 0 0 0 0 0 1 4 0 0 0 24 7 46 10 14 0 0 38 27 47  
53 483 280 384 153 169 125 178 253 219 158 189 89 208 148 621 56 53 13 297 603 0 4 115 15 4 0 55 393  
0 0 0 0 0 0 3 0 1 0 0 0 3 2 9 6 100 22 0 0 55 0 0 0 4 0 0 21 1  
16 0 238 0 0 0 0 0 0 0 0 0 0 24 0 0 0 0 0 0 0 26 0 3 1 147 0  
M02255\_77\_000000000-ADUT3\_1\_1112\_14068\_17113 T---AC---GT-AG-GGT-----GCG-A-G-----C--G--T--T--GT-C-CGG-AA-----TT-A--T-T--GG-GC-----GT--A----AA-GA-GC-TT-----G-TA-G-G-C-G-----G--T-TT-G-T-C-----  
-----GC---G-T-C-T-----G-C-T--G--TG--A-AA-GA--C-C-GG-G-G----CT-T-AA-----C-T-C-C-G-G-T--T-C---T-G--C-A--G--T-----G--GG-T-A--C-----G--G-G--CA--G-A-C---T-A-G-A-G-T--G---T-GG----TA-G-G-----G-G-A-G--AC-T-----GG--A--ATT---C-  
C-T-G-GT--GT-A-G-CG-GT--G---A--A--TG-C-GC-AG--AT-A-TC--A-G--G-A-G-G-A-AC-A-CC---GA--T--G--GC-GAA-G--G-C--A-----G--G-T-C-T---CTG--G--GC-C-A-----T-T---A-C-T--GA--CG-C-T-G--A-GA--A-G-CG-A--AA-G-C---A-TG--GG-  
G--AG-C-G-AA-----CA--GG Bacteria(100);Actinobacteria(100);Actinobacteria(100);Actinobacteridae(100);Actinomycetales(100);Micrococcineae(100);unclassified(100);unclassified(100);unclassified(100);

Otu0203 0 0 0 0 0 0 0 0 0 0 0 0 0 0 0 0 0 0 0 2 2 1 0 0 0 4 0 15  
0 0 0 0 0 0 0 0 0 15 52 1 30 22 0 0 0 0 0 0 0 0 0 0 0 0 0  
0 0 0 0 0 0 0 0 0 0 0 0 0 0 0 0 0 0 0 0 0 0 0 0 0 0 0 0  
0 0 0 8 34 0 0 0 0 0 0 0 0 0 0 0 69 0 0 0 0 0 0 0 5 0 0  
M02255\_77\_000000000-ADUT3\_1\_1117\_10790\_19901 T---AC---GT-AG-GGA-----CCA-A-G-----C--G--T--T--AT-C-CGG-AT-----TT-A--C-T--GG-GC-----GT--A----AA-GG-GC-GC-----G-TA-G-G-C-G-----G--C-GT-G-G-T-----  
-----AA---G-T-C-A-----C-T-T--G--TG--A-AA-TC--T-C-TG-A-G-----CT-T-AA-----C-T-C-A-G-A-A--C-G---G-C--C-A--A--G-----T--GA-T-A--C-----T--G-C--TG--T-G-C---T-A-G-A-G-T--G---C-AG----AA-G-G-----G-G-C-A--AT-C-----GG--A--ATT---C-  
T-T-G-GT--GT-A-G-CG-GT--G---A--A--TG-C-GT-AG--AT-A-TC--A-A--G-A-G-G-A-AC-A-CC---TG--A--G--GT-GAA-G--A-C--G-----G--G-T-T-G---CTG--G--GC-T-G-----A-C---A-C-T--GA--CG-C-T-G--A-GG--C-G-CG-A--AA-G-C---C-AG--GG-  
G--AG-C-A-AA-----CG--GG Bacteria(100);Acidobacteria(100);Acidobacteria(100);Acidobacteriales(100);Acidobacteriaceae(100);Candidatus\_Chloroacidobacterium(100);unclassified(100);unclassified(100);unclassified(100);

Otu0204 0 0 0 0 0 22 15 0 0 0 0 0 0 0 0 0 0 0 1 0 0 0 0 0 0 0 0 0  
0 0 3 0 0 0 23 0 0 57 3 0 0 72 70 0 0 0 0 0 0 0 0 0 0 0 34 0  
0 0 0 0 0 0 0 0 0 0 0 3 0 122 131 4 0 105 0 0 0 0 0 0 0 0 70  
14 117 0 6 49 0 0 0 0 17 0 0 9 49 0 0 0 0 0 0 0 0 0 0 8 0 0  
M02255\_77\_000000000-ADUT3\_1\_1107\_15299\_16050 T---AC---GT-AG-GGG-----GCA-A-G-----C--G--T--T--AT-C-CGG-AT-----TT-A--C-T--GG-GT-----GT--A----AA-GG-GA-GC-----G-CA-G-A-C-G-----G--C-AA-T-G-C-----  
-----AA---G-T-C-T-----G-A-A--G--TG--A-AA-GG--C-G-TG-G-G----CT-C-AA-----C-C-C-A-T-G-A--A-C---T-G--C-T--T--T-----G--GA-A-A--C-----T--G-T--AT--A-G-C---T-T-G-A-G-T--G---T-CG----GA-G-G-----G-G-T-A--AG-C-----GG--A--ATT---  
C-C-T-A-GT--GT-A-G-CG-GT--G---A--A--TG-C-GT-AG--AT-A-TT--A-G--G-A-G-G-A-AC-A-CC---GG--A--G--GC-GAA-G--G-C--G-----G--C-T-T-A---CTG--G--AC-G-A-----C-A---A-C-T--GA--CG-T-T-G--A-GG--C-T-CG-A--AG-G-C---G-TG--  
GG-G--AG-C-A-AA-----CA--GG Bacteria(100);Firmicutes(100);Clostridia(100);Clostridiales(100);Lachnospiraceae(100);Johnsonella(100);unclassified(100);unclassified(100);unclassified(100);



Otu0205 0 0 0 0 1 0 0 0 0 0 0 0 11 0 0 0 0 0 0 5 0 0 0 0 17 0 1 4 6  
0 0 0 0 0 0 0 0 0 0 0 0 0 0 0 0 0 0 0 0 0 0 0 0 0 0 0  
0 0 0 0 0 0 0 0 0 0 0 0 0 0 0 0 0 0 0 0 0 0 4 0 0 0 0 0  
0 0 0 0 0 0 0 0 0 0 0 0 0 0 0 0 0 0 0 0 0 0 0 0 0 0  
M02255\_77\_000000000-ADUT3\_1\_2109\_29199\_9415 T---AC---GG-AG-GAT-----CCA-A-G-----C--G--T---T--AT-C-CGG-AA-----TC-A--T-T--GG-G-----TT-----G-G--C-----G-G-C-----C-C--T-G-T-----AA---G-T-C-  
A-----G-C-G--G--TG--A-AA-TC--T-C-CC-G-G-----CT-C-AA-----C-C-G-G-G-A-A-A-T---G-G--C-C--G--T-----T--GA-T-A--C-----T--G-C--AG--G-G-C---T-T-G-A-A-T--T--A-GT----AG-G-A-----A-G-T-A--AC-T-----AG--A--ATA---T-G-T-A-GT--GT-A-  
G-CG-GT--G---A-A-A---TG-C-TT-AG--AG-A-TT--A-C--A-T-G-G-A-AT-A-CC---AA--T--T--GC-GAA-G--G-C-A-----G--G-T-T-A---CTA--C--TA-C-T-----A-T---A-T-T--GA--CG-C-T-G--A-GG--G-A-CG-A-AA-G-C---G-TG--GG-T--AG-C-G-AA-----  
CA--GG Bacteria(100);Bacteroidetes(100);Flavobacteria(100);Flavobacteriales(100);Flavobacteriaceae(100);unclassified(100);unclassified(100);unclassified(100);unclassified(100);

Otu0206 0 0 0 0 0 0 0 0 0 0 0 0 0 0 3 0 0 6 0 0 0 0 0 2 0 0 0 0  
0 0 0 0 0 0 0 0 0 0 0 0 0 0 0 0 0 6 0 0 0 0 0 0 0 0 0 0  
0 0 0 0 0 0 0 0 0 0 6 0 0 0 0 0 0 0 0 0 0 0 0 0 0 0 0 0  
0 0 0 0 0 0 0 0 0 0 0 0 2 0 0 0 0 0 0 0 0 0 0 0 0 0 0  
M02255\_76\_000000000-ADUNE\_1\_2110\_13319\_8982 T---AC---CG-AC-AGA-----ATA-A-G-----C---A--C-CG-G-CTA-AC-----TC-T--G-T--GC-CA-----GC--AG---CC-GC-GG-TA-----A-TACA-G-A-G-----G--G-TT-G-C-A-----  
AG---C-G-T-T-----A-A-T--C--GG--A-AA-TC--C-C-CG-G-G-----CT-C-AA-----C-C-T-G-G-G-A-A-C---T-G--C-A--T--C-----C-AA-A-A--C-----T--G-G--CA--A-G-C---T-A-G-A-G-T--A--T-GG---TA-G-A-----G-G-G-T--AG-T-----GG--A--ATT---T-C-C-  
T-GT--GT-A-G-CG-GT--G---A-A-A---TG-C-GT-AG--AT-A-TA--G-G--A-A-G-G-A-AC-A-CC---AG--T--G--GC-GAA-G--G-C-G-----A-C-T-A-C---CTG--G--AC-T-G-----A-T---A-C-T--GA--CA-C-T-G--A-GG--T-G-CG-A-AA-G-C---G-TG--GG-G--  
AG-C-A-AA-----CA--GG Bacteria(100);Proteobacteria(100);Gammaproteobacteria(100);unclassified(100);unclassified(100);unclassified(100);unclassified(100);unclassified(100);unclassified(100);

Otu0207 0 559 700 0 0 0 1520 464 2854 0 0 0 0 0 0 1 2 0 0 0 18 0 0 4 0 0 0 0  
0 0 7 52 0 0 0 0 0 0 91 599 0 0 0 111 25 0 0 0 0 0 17 0 8 0 0 0  
0 0 0 0 0 0 0 0 0 0 0 0 5 0 41 25 46 91 0 0 0 0 0 89 0 0 0 330  
0 1 0 15 0 0 30 0 0 0 0 141 0 1 0 38 79 0 0 0 0 11 20 1111 1 0  
M02255\_77\_000000000-ADUT3\_1\_1101\_20883\_14129 T---AC---GT-AG-GGA-----GCA-A-G-----C--G--T---T--GT-C-CGG-AT-----TT-A--C-T--GG-GT-----GT--A---AA-GG-GT-GC-----G-TA-G-G-C-G-----G--C-TT-T-G-C-----  
-----AA---G-T-C-A-----G-A-T--G--TG--A-AA-TC--T-A-TG-G-G-----CT-C-AA-----C-C-C-A-T-A-A-A-C---T-G--C-A--T--T-----T--GA-A-A--C-----T--G-T--AG--A-G-C---T-T-G-A-G-T--G--A-AG---TA-G-A-----G-G-C-A--GG-C-----GG--A--ATT---C-  
C-C-C-GT--GT-A-G-CG-GT--G---A-A-A---TG-C-GT-AG--AG-A-TG--G-G--G-A-G-G-A-AC-A-CC---AG--T--G--GC-GAA-G--G-C-G-----G--C-C-T-G---CTG--G--GC-T-T-----T-A---A-C-T--GA--CG-C-T-G--A-GG--C-A-CG-A-AA-G-C---G-TG--GG-  
T--AG-C-A-AA-----CA--GG Bacteria(100);Firmicutes(100);Clostridia(100);Clostridiales(100);Ruminococcaceae(100);unclassified(100);unclassified(100);unclassified(100);unclassified(100);

Otu0208 0 0 0 0 0 0 0 0 0 0 0 0 0 0 0 0 0 0 0 0 0 2 0 0 0 4 0 15  
0 0 0 0 0 0 0 0 0 17 0 0 0 0 0 0 0 0 0 0 0 0 0 0 2 0 0 0  
0 0 0 0 0 0 0 0 0 0 0 0 0 0 0 0 101 0 0 57 0 0 0 54 0 0 0 0  
0 0 0 0 0 0 0 0 0 0 0 0 0 0 0 96 0 0 0 0 0 0 0 0 0 0 0  
M02255\_77\_000000000-ADUT3\_1\_1114\_9865\_16668 T---AC---GA-AG-GGG-----GCT-A-G-----C--G--T---T--GT-T-CGG-AT-----TT-A--C-T--GG-GC-----GT--A---AA-GC-GC-AC-----G-TA-G-G-C-G-----G--A-TC-G-T-T-----AA-  
---G-T-C-G-----G-G-G--G--TG--A-AA-TC--C-T-GG-A-G-----CT-C-AA-----C-T-C-C-A-G-A-A-C---T-G--C-C---T--T-----C--GA-T-A--C-----T--G-G--CG--A-T-C---T-C-G-A-G-T--C---C-GG---AA-G-A-----G-G-T-G---AG-T-----GG--A--ACT---C-C-T-A-  
GT--GT-A-G-AG-GT--G---G--A-A---TT-C-GT-AG--AT-A-TT--A-G--G-A-A-G-A-AC-A-CC---AG--T--G--GC-GAA-G--G-C-G-----G--C-T-C-A---CTG--G--TC-C-G-----G-T---A-C-T--GA--CG-C-T-G--A-GG--T-G-CG-A-AA-G-C---G-TG--GG-G--AG-  
C-A-AA-----CA--GG Bacteria(100);Proteobacteria(100);Alphaproteobacteria(100);Rhizobiales(100);Hyphomicrobiaceae(100);Devosia(92);unclassified(92);unclassified(92);unclassified(92);

Otu0209 0 415 0 0 0 24 204 32 476 0 0 0 0 0 0 1 0 0 0 4 0 4 8 1 0 0 0 0  
0 930 25 141 0 0 0 0 0 0 0 320 1 0 0 0 0 0 6 0 0 0 0 0 0 0 0  
0 0 0 0 0 0 0 0 0 0 8 0 1 0 8 1 0 83 0 0 0 0 0 0 0 0 0  
16 0 0 15 0 0 11 0 0 0 0 58 3 36 0 0 0 0 0 0 0 0 0 12 166 0 0  
M02255\_76\_000000000-ADUNE\_1\_2111\_10458\_13871 T---AC---GT-AG-GGG-----GCA-A-G-----C--G--T---T--AT-C-CGG-AT-----TT-A--C-T--GG-GT-----GT--A---AA-GG-GA-GC-----G-TA-G-A-C-G-----G--C-AC-G-G-C-----  
-----AA---G-C-C-A-----G-A-T--G--TG--A-AA-GC--C-C-GG-G-G-----CT-C-AA-----C-C-C-C-G-G-G--A-C---T-G--C-A--T--T-----T--GG-A-A--C-----T--G-C--TG--A-G-C---T-A-G-A-G-T--G---T-CG---GA-G-A-----G-G-C-A--AG-T-----GG--A--ATT---  
C-C-T-A-GT--GT-A-G-CG-GT--G---A-A-A---TG-C-GT-AG--AT-A-TT--A-G--G-A-G-G-A-AC-A-CC---AG--T--G--GC-GAA-G--G-C-G-----G--C-T-T-G---CTG--G--AC-G-A-----T-G---A-C-T--GA--CG-T-T-G--A-GG--C-T-CG-A-AA-G-C---G-TG--GG-  
G--AG-C-A-AA-----CA--GG Bacteria(100);Firmicutes(100);Clostridia(100);Clostridiales(100);Lachnospiraceae(100);Incertae\_Sedis(99);unclassified(99);unclassified(99);unclassified(99);



|                                              |       |         |                                                                                                                                         |                                                                                                                                                                                                                                                                                                                                                                                                                                              |                                                                                                                                                                            |    |    |   |     |    |    |   |    |   |    |     |    |    |   |   |    |    |    |     |    |   |
|----------------------------------------------|-------|---------|-----------------------------------------------------------------------------------------------------------------------------------------|----------------------------------------------------------------------------------------------------------------------------------------------------------------------------------------------------------------------------------------------------------------------------------------------------------------------------------------------------------------------------------------------------------------------------------------------|----------------------------------------------------------------------------------------------------------------------------------------------------------------------------|----|----|---|-----|----|----|---|----|---|----|-----|----|----|---|---|----|----|----|-----|----|---|
| Otu0210                                      | 0     | 0       | 0                                                                                                                                       | 0                                                                                                                                                                                                                                                                                                                                                                                                                                            | 0                                                                                                                                                                          | 0  | 0  | 0 | 0   | 0  | 0  | 0 | 0  | 0 | 0  | 0   | 0  | 0  | 0 | 0 | 0  | 0  | 8  | 0   | 0  | 0 |
|                                              | 0     | 0       | 0                                                                                                                                       | 0                                                                                                                                                                                                                                                                                                                                                                                                                                            | 0                                                                                                                                                                          | 0  | 0  | 0 | 0   | 0  | 0  | 0 | 0  | 0 | 0  | 0   | 0  | 0  | 0 | 0 | 71 | 0  | 0  | 0   | 0  |   |
|                                              | 0     | 0       | 0                                                                                                                                       | 0                                                                                                                                                                                                                                                                                                                                                                                                                                            | 0                                                                                                                                                                          | 0  | 0  | 0 | 0   | 0  | 4  | 0 | 30 | 0 | 0  | 18  | 0  | 0  | 0 | 0 | 0  | 0  | 0  | 0   | 0  |   |
|                                              | 0     | 0       | 0                                                                                                                                       | 0                                                                                                                                                                                                                                                                                                                                                                                                                                            | 0                                                                                                                                                                          | 0  | 0  | 0 | 0   | 0  | 0  | 0 | 0  | 0 | 0  | 0   | 0  | 0  | 0 | 0 | 0  | 0  | 0  | 0   | 0  |   |
| M02255_76_000000000-ADUNE_1_1116_10609_14909 | T---- | AC--GA- | AG-GGG-----GCT-A-G-----C-G-T---T--GC-T-CGG-AA-----TT-A-C-T--GG-GC-----GT--A----AA-GG-GC-GC-----G-TA-G-G-C-G-----G-A-CA-G-T-T-----TA---  | G-T-C-A-----G-A-G--G--TG--A-AA-GC--C-C-AG-G-G----CT-C-AA-----C-C-T-T-G-G-A-A-T---T-G--C-C---T-T-----T--GA-T-A--C-----T-G-G--CT--G-T-C---T-T-G-A-G-T-A--C-GG-----GA-G-A-----G-G-T-G--TG-T-----GG-A--ACT---C-G-A-GT--GT-A-G-AG-GT--G---A-A-A---TT-C-GT-AG--AT-A-TT--C-G--G-A-A-G-A-AC-A-CC--AG--T--G--GC-GAA-G--G-C-G-----A-C-A-C-A--CTG--G--CC-C-G-----T-T---A-C-T--GA--CG-C-T-G--A-GG--C-G-CG-A--AA-G-C--G-TG--GG-G--AG-C-A-AA-----CA--GG    | Bacteria(100);Proteobacteria(100);Alphaproteobacteria(100);Caulobacterales(100);Caulobacteraceae(100);unclassified(78);unclassified(78);unclassified(78);unclassified(78); |    |    |   |     |    |    |   |    |   |    |     |    |    |   |   |    |    |    |     |    |   |
| Otu0211                                      | 0     | 0       | 0                                                                                                                                       | 150                                                                                                                                                                                                                                                                                                                                                                                                                                          | 0                                                                                                                                                                          | 0  | 0  | 0 | 0   | 0  | 0  | 0 | 0  | 0 | 0  | 0   | 0  | 0  | 0 | 0 | 1  | 0  | 0  | 0   | 0  |   |
|                                              | 65    | 0       | 0                                                                                                                                       | 0                                                                                                                                                                                                                                                                                                                                                                                                                                            | 0                                                                                                                                                                          | 29 | 0  | 0 | 0   | 0  | 0  | 0 | 0  | 0 | 0  | 0   | 0  | 42 | 0 | 0 | 0  | 0  | 0  | 121 | 0  |   |
|                                              | 0     | 0       | 0                                                                                                                                       | 0                                                                                                                                                                                                                                                                                                                                                                                                                                            | 0                                                                                                                                                                          | 0  | 0  | 0 | 0   | 0  | 5  | 0 | 8  | 0 | 0  | 820 | 0  | 0  | 0 | 0 | 4  | 0  | 0  | 0   | 0  |   |
|                                              | 0     | 0       | 0                                                                                                                                       | 54                                                                                                                                                                                                                                                                                                                                                                                                                                           | 0                                                                                                                                                                          | 0  | 0  | 7 | 0   | 0  | 0  | 0 | 28 | 0 | 42 | 0   | 64 | 0  | 0 | 0 | 0  | 26 | 0  | 0   | 0  |   |
| M02255_77_000000000-ADUT3_1_1114_11060_14599 | T---- | AC--GG- | AG-GGG-----GTT-A-G-----C-G-T---T--GT-T-CGG-AA-----TG-A-C-T--GG-GC-----GT--A----AA-GC-GC-GC-----G-TA-G-G-C-G-----G-A-TC-G-C-A-----AA---  | G-T-T-G-----G-G-G--G--TG--A-AA-GC--C-C-AG-G-G----CT-C-AA-----C-C-C-T-G-G-A-A-T---T-G--C-C---T-T-----C--AA-G-A--C-----T--C-G--CG--G-T-C---T-G-G-A-G-T-T--C-GA---GA-G-A-----G-G-T-G--GG-T-----GG-A--ATT---C-C-G-A-GT--GT-A-G-AG-GT--G---A-A-A---TT-C-GT-AG--AT-A-TT--C-G--G-A-G-G-A-AC-A-CC--AG--T--G--GC-GAA-G--G-C-G-----G--C-C-C-A--CTG--G--CT-C-G-----A-C---A-C-T--GA--CG-C-T-G--A-GG--C-G-CG-A--AA-G-C--G-CG--GG-G--AG-C-A-AA-----CA--GG  | Bacteria(100);Proteobacteria(100);Alphaproteobacteria(100);unclassified(100);unclassified(100);unclassified(100);unclassified(100);unclassified(100);unclassified(100);    |    |    |   |     |    |    |   |    |   |    |     |    |    |   |   |    |    |    |     |    |   |
| Otu0212                                      | 0     | 241     | 112                                                                                                                                     | 0                                                                                                                                                                                                                                                                                                                                                                                                                                            | 0                                                                                                                                                                          | 0  | 50 | 2 | 451 | 0  | 0  | 0 | 0  | 0 | 0  | 0   | 0  | 0  | 0 | 0 | 0  | 0  | 0  | 0   | 0  |   |
|                                              | 0     | 0       | 0                                                                                                                                       | 0                                                                                                                                                                                                                                                                                                                                                                                                                                            | 0                                                                                                                                                                          | 0  | 0  | 0 | 0   | 32 | 17 | 0 | 0  | 0 | 0  | 0   | 0  | 0  | 0 | 0 | 0  | 0  | 0  | 0   | 0  |   |
|                                              | 0     | 0       | 0                                                                                                                                       | 0                                                                                                                                                                                                                                                                                                                                                                                                                                            | 0                                                                                                                                                                          | 0  | 0  | 0 | 0   | 0  | 0  | 0 | 0  | 0 | 21 | 0   | 0  | 0  | 0 | 0 | 0  | 0  | 0  | 0   | 72 |   |
|                                              | 0     | 0       | 0                                                                                                                                       | 0                                                                                                                                                                                                                                                                                                                                                                                                                                            | 0                                                                                                                                                                          | 0  | 0  | 0 | 0   | 0  | 0  | 0 | 0  | 0 | 0  | 0   | 0  | 0  | 0 | 0 | 0  | 0  | 40 | 0   | 0  |   |
| M02255_77_000000000-ADUT3_1_1104_22816_9870  | T---- | AC--GT- | AG-GTG-----GCA-A-G-----C-G-T---T--GT-C-CGG-AT-----TT-A-C-T--GG-GT-----GT--A----AA-GG-GC-GT-----G-TA-G---CCG-----G--G-AA-G-G-C-----AA--- | G-T-C-A-----G-A-T--G--TG--A-AA-TC--C-A-CG-G-G----CT-T-AA-----C-T-C-G-T-G-A-A-C---T-G--C-A--T-T-----T--GA-A-A--C-----T--A-C--TT--T-T-C---T-T-G-A-G-T-A--T-CG-----GA-G-A-----G-G-C-A--AT-C-----GG--A--ATT---C-C-T-A-GT--GT-A-G-CG-GT--G---A-A-A---TG-C-GT-AG--AT-A-TT--A-G--G-A-G-G-A-AC-A-CC--AG--T--G--GC-GAA-G--G-C-G-----G--A-T-T-G--CTG--G--AC-G-A-----C-A--A-C-T--GA--CG-G-T-G--A-GG--C-G-CG-A--AA-G-C--G-TG--GG-G--AG-C-A-AA-----CA--GG | Bacteria(100);Firmicutes(100);Clostridia(100);Clostridiales(100);Ruminococcaceae(100);unclassified(100);unclassified(100);unclassified(100);unclassified(100);             |    |    |   |     |    |    |   |    |   |    |     |    |    |   |   |    |    |    |     |    |   |
| Otu0213                                      | 0     | 0       | 0                                                                                                                                       | 0                                                                                                                                                                                                                                                                                                                                                                                                                                            | 0                                                                                                                                                                          | 0  | 0  | 0 | 0   | 0  | 0  | 0 | 0  | 0 | 0  | 0   | 0  | 0  | 0 | 5 | 0  | 0  | 0  | 0   | 0  |   |
|                                              | 0     | 0       | 16                                                                                                                                      | 0                                                                                                                                                                                                                                                                                                                                                                                                                                            | 0                                                                                                                                                                          | 0  | 19 | 0 | 44  | 0  | 12 | 0 | 0  | 0 | 2  | 0   | 16 | 0  | 0 | 0 | 0  | 5  | 0  | 0   | 1  |   |
|                                              | 0     | 0       | 0                                                                                                                                       | 0                                                                                                                                                                                                                                                                                                                                                                                                                                            | 0                                                                                                                                                                          | 0  | 0  | 0 | 0   | 0  | 0  | 0 | 0  | 0 | 0  | 0   | 0  | 0  | 0 | 0 | 0  | 0  | 0  | 0   |    |   |
|                                              | 9     | 0       | 25                                                                                                                                      | 5                                                                                                                                                                                                                                                                                                                                                                                                                                            | 0                                                                                                                                                                          | 0  | 0  | 1 | 0   | 0  | 0  | 0 | 0  | 0 | 0  | 467 | 0  | 0  | 0 | 0 | 0  | 0  | 0  | 0   | 0  |   |
| M02255_77_000000000-ADUT3_1_2117_5846_7650   | T---- | AC--GT- | AG-GGC-----GCG-A-G-----C-G-T---T--GT-C-CGG-AA-----TT-A-T-T--GG-GC-----GT--A----AA-GA-GC-TC-----G-TA-G-G-C-G-----G--C-TT-G-T-C-----AC--- | G-T-C-G-----G-T-T-G--TG--A-AA-GC--C-C-GG-G-G----CT-T-AA-----C-C-C-C-G-G-G-T-C---T-G--C-A--G-T-----C--GA-T-A--C-----G--G-G--CA--G-G-C---T-A-G-A-G-T-T--C-GG-----TA-G-G-----G-G-A-G--AT-C-----GG--A--ATT---C-C-T-G-GT--GT-A-G-CG-GT--G---A                                                                                                                                                                                                     |                                                                                                                                                                            |    |    |   |     |    |    |   |    |   |    |     |    |    |   |   |    |    |    |     |    |   |



|                                                                                                                                                                                                                                                                                                                                                                                                                                                                                                                                                                                                                                                                                                                                                                                                                |    |     |     |     |     |      |      |     |    |     |    |   |    |    |   |    |     |    |     |   |   |   |    |     |   |    |   |
|----------------------------------------------------------------------------------------------------------------------------------------------------------------------------------------------------------------------------------------------------------------------------------------------------------------------------------------------------------------------------------------------------------------------------------------------------------------------------------------------------------------------------------------------------------------------------------------------------------------------------------------------------------------------------------------------------------------------------------------------------------------------------------------------------------------|----|-----|-----|-----|-----|------|------|-----|----|-----|----|---|----|----|---|----|-----|----|-----|---|---|---|----|-----|---|----|---|
| Otu0215                                                                                                                                                                                                                                                                                                                                                                                                                                                                                                                                                                                                                                                                                                                                                                                                        | 0  | 0   | 0   | 0   | 0   | 0    | 0    | 0   | 0  | 0   | 0  | 0 | 0  | 0  | 0 | 0  | 0   | 0  | 0   | 0 | 0 | 0 | 1  | 19  | 0 | 0  | 1 |
|                                                                                                                                                                                                                                                                                                                                                                                                                                                                                                                                                                                                                                                                                                                                                                                                                | 0  | 0   | 0   | 0   | 0   | 0    | 0    | 0   | 0  | 0   | 0  | 0 | 0  | 0  | 0 | 0  | 0   | 0  | 0   | 0 | 0 | 0 | 0  | 0   | 0 | 0  |   |
|                                                                                                                                                                                                                                                                                                                                                                                                                                                                                                                                                                                                                                                                                                                                                                                                                | 0  | 0   | 0   | 0   | 0   | 0    | 0    | 0   | 0  | 0   | 0  | 0 | 0  | 0  | 0 | 0  | 0   | 0  | 0   | 0 | 3 | 1 | 0  | 0   | 0 | 0  |   |
|                                                                                                                                                                                                                                                                                                                                                                                                                                                                                                                                                                                                                                                                                                                                                                                                                | 0  | 0   | 0   | 0   | 0   | 0    | 0    | 0   | 1  | 5   | 0  | 1 | 0  | 0  | 0 | 0  | 0   | 0  | 0   | 0 | 0 | 0 | 0  | 0   | 0 | 0  |   |
| M02255_76_000000000-ADUNE_1_2110_24099_19451 T---AA---GC-AC-CGG-----CTA-A-C-----T-A-C--G--TG-C-CAG-CA-----GC-C--G-C-GG-TA-----AT-A----CG-TA-GG-GT-----G-CA-A-G-C-G-----T-T-AA-TCG-G-----AA---G-A-C-A-----G-A-T-G--TG--A-AA-TC--C-C-CG-G-G----CT-C-AA-----C-C-T-G-G-G-A--A-T---T-G--C-A--T-C-----A--GT-G-A--C-----T-G-C--AT--A-G-C---T-T-G-A-G-T-G--C-GG----CA-G-A-----G-G-G-G--GA-T-----GG--A--ATT---C-C-G-C-GT--GT-A-G-CA-GT--G---A-A-A--TG-C-GT-AG--AT-A-TG--C-G--G-A-G-G-A-AC-A-CC--GA--T-G--GC-GAAG--G-C-A-----A-T-C-C-C--CTG--G--GC-C-T-----G-C--A-C-T--GA--CG-C-T-C--A-TG--C-A-CG-A-AA-G-C--G-TG--GG-G--AG-C-A-AA-----CA--GG Bacteria(100);Proteobacteria(100);Betaproteobacteria(100);Burkholderiales(100);Comamonadaceae(100);unclassified(100);unclassified(100);unclassified(100);unclassified(100); |    |     |     |     |     |      |      |     |    |     |    |   |    |    |   |    |     |    |     |   |   |   |    |     |   |    |   |
| Otu0216                                                                                                                                                                                                                                                                                                                                                                                                                                                                                                                                                                                                                                                                                                                                                                                                        | 0  | 0   | 0   | 0   | 0   | 132  | 17   | 307 | 39 | 76  | 0  | 0 | 0  | 1  | 0 | 0  | 0   | 0  | 0   | 0 | 1 | 0 | 18 | 4   | 0 | 0  | 0 |
|                                                                                                                                                                                                                                                                                                                                                                                                                                                                                                                                                                                                                                                                                                                                                                                                                | 0  | 0   | 655 | 370 | 658 | 1013 | 1002 | 82  | 91 | 0   | 87 | 0 | 0  | 37 | 0 | 0  | 0   | 0  | 0   | 0 | 0 | 0 | 0  | 0   | 0 | 0  |   |
|                                                                                                                                                                                                                                                                                                                                                                                                                                                                                                                                                                                                                                                                                                                                                                                                                | 0  | 0   | 0   | 0   | 0   | 0    | 0    | 0   | 0  | 0   | 0  | 0 | 0  | 0  | 0 | 0  | 90  | 0  | 0   | 0 | 0 | 0 | 0  | 0   | 0 | 0  |   |
|                                                                                                                                                                                                                                                                                                                                                                                                                                                                                                                                                                                                                                                                                                                                                                                                                | 86 | 115 | 81  | 0   | 0   | 0    | 0    | 0   | 0  | 145 | 7  | 0 | 8  | 0  | 0 | 13 | 117 | 28 | 268 | 0 | 0 | 0 | 0  | 0   | 0 | 0  |   |
| M02255_76_000000000-ADUNE_1_1119_9629_8915 G---AC--GT-AG-GAT-----GCG-A-G-----C-G--T--T--GT-C-CGG-AT-----TT-A-T-T--GG-GC-----GT-A---AA-GA-GT-TC-----G-T-T-----AA---G-T-T-T-----G-A-T-G--TT--A-AA-GA--T-C-GG-G-G----CT-C-AA-----C-C-T-C-G-G-G--A-C---A-G--C-A--T-T-----G--AA-T-A--C-----T--G-G--CA--G-A-C---T-T-G-A-G-T-A--T-GG---TA-G-A-----G-G-C-T--AG-T-----GG--A--ATT---C-C-C-A-GT--GT-A-G-CG-GT--G---A-A-A--TG-C-GT-AG--AT-A-TT--G-G--G-A-G-A-AC-A-CC--GG--T-G--GC-GTA-G-G-C-G-----A-C-T-A-G--CTG--G--GC-C-A-----T-A--A-C-T--GA--CG-C-T-G-A-GG--A-A-CG-A-AA-G-C--C-AG--GG-G--AG-C-G-AA-----AG--GG Bacteria(100);Cyanobacteria(100);MLE1-12(100);unclassified(100);unclassified(100);unclassified(100);unclassified(100);unclassified(100);unclassified(100);                                                |    |     |     |     |     |      |      |     |    |     |    |   |    |    |   |    |     |    |     |   |   |   |    |     |   |    |   |
| Otu0217                                                                                                                                                                                                                                                                                                                                                                                                                                                                                                                                                                                                                                                                                                                                                                                                        | 0  | 0   | 11  | 0   | 0   | 0    | 0    | 0   | 0  | 0   | 0  | 0 | 0  | 0  | 0 | 0  | 0   | 0  | 0   | 0 | 0 | 0 | 0  | 3   | 0 | 0  | 0 |
|                                                                                                                                                                                                                                                                                                                                                                                                                                                                                                                                                                                                                                                                                                                                                                                                                | 0  | 0   | 0   | 25  | 0   | 0    | 1    | 0   | 0  | 0   | 0  | 0 | 19 | 0  | 0 | 0  | 0   | 0  | 0   | 0 | 0 | 0 | 0  | 9   | 0 | 0  |   |
|                                                                                                                                                                                                                                                                                                                                                                                                                                                                                                                                                                                                                                                                                                                                                                                                                | 0  | 0   | 0   | 0   | 0   | 0    | 0    | 0   | 0  | 0   | 0  | 0 | 0  | 0  | 0 | 0  | 0   | 39 | 0   | 0 | 1 | 0 | 0  | 0   | 0 | 0  |   |
|                                                                                                                                                                                                                                                                                                                                                                                                                                                                                                                                                                                                                                                                                                                                                                                                                | 0  | 0   | 0   | 0   | 28  | 0    | 0    | 0   | 0  | 0   | 0  | 0 | 1  | 0  | 0 | 0  | 0   | 0  | 0   | 0 | 0 | 0 | 0  | 0   | 0 | 10 |   |
| M02255_76_000000000-ADUNE_1_2106_21048_13264 T---AA---GC-AC-CGG-----CTA-A-C-----T-A-C--G--TG-C-CAG-CA-----GC-C--G-C-GG-TA-----AT-A----CG-TA-GG-GT-----G-CA-A-G-C-G-----T-TAATC-G-G-A-----AA---G-A-A-A-----G-A-T-G--TG--A-AA-TC--C-C-AG-G-G----CT-C-AA-----C-C-T-T-G-G-A--A-C---T-G--C-A--T-T-----T--TT-A-A--C-----T--A-C--CG--A-A-C---T-A-G-A-G-T-A--T-GT---CA-G-A-----G-G-G-G--GG-T-----GG--A--ATT---C-C-A-C-GT--GT-A-G-CA-GT--G---A-A-A--TG-C-GT-AG--AT-A-TG--T-G--G-A-G-G-A-AC-A-CC--GA--T-G--GC-GAA-G-G-C-A-----G--C-C-C-C--CTG--G--GA-T-A-----A-T--A-C-T--GA--CG-C-T-C--A-TG--C-A-CG-A-AA-G-C--G-TG--GG-G--AG-C-A-AA-----CA--GG Bacteria(100);Proteobacteria(100);Betaproteobacteria(100);Burkholderiales(100);Alcaligenaceae(100);Alcaligenes(57);unclassified(57);unclassified(57);unclassified(57);    |    |     |     |     |     |      |      |     |    |     |    |   |    |    |   |    |     |    |     |   |   |   |    |     |   |    |   |
| Otu0218                                                                                                                                                                                                                                                                                                                                                                                                                                                                                                                                                                                                                                                                                                                                                                                                        | 0  | 0   | 0   | 0   | 0   | 0    | 0    | 0   | 0  | 0   | 0  | 0 | 0  | 0  | 0 | 0  | 0   | 0  | 0   | 0 | 0 | 0 | 0  | 0   | 0 | 0  |   |
|                                                                                                                                                                                                                                                                                                                                                                                                                                                                                                                                                                                                                                                                                                                                                                                                                | 0  | 0   | 0   | 0   | 0   | 0    | 0    | 0   | 0  | 0   | 0  | 0 | 16 | 0  | 0 | 0  | 0   | 0  | 0   | 0 | 0 | 0 | 0  | 0   | 0 | 0  |   |
|                                                                                                                                                                                                                                                                                                                                                                                                                                                                                                                                                                                                                                                                                                                                                                                                                | 0  | 0   | 0   | 0   | 0   | 0    | 0    | 18  | 0  | 5   | 0  | 0 | 0  | 16 | 0 | 0  | 0   | 0  | 0   | 0 | 0 | 0 | 0  | 148 | 0 | 0  |   |
|                                                                                                                                                                                                                                                                                                                                                                                                                                                                                                                                                                                                                                                                                                                                                                                                                | 0  | 117 | 0   | 0   | 126 | 0    | 0    | 0   | 0  | 0   | 0  | 0 | 0  | 0  | 0 | 0  | 0   | 0  | 11  | 0 | 0 | 0 | 0  | 0   | 0 | 0  |   |
| M02255_77_000000000-ADUT3_1_2111_10156_14895 T---AC--GT-AT-GTC-----GCG-A-G-----C-G--T--T--AT-C-CGG-AA-----TT-A-T-T--GG-GC-----AT-A---AA-GG-GC-AT-----C-TA-G-G-C-G-----G--C-CG-G-G-T-----AA---G-T-C-C-----G-G-G-G--TG--A-AA-AC--T-G-CT-G-G----CT-C-AA-----C-C-A-G-C-A-G--C-C---T-G--C-C---T-T-----G--GA-A-A--                                                                                                                                                                                                                                                                                                                                                                                                                                                                                                   |    |     |     |     |     |      |      |     |    |     |    |   |    |    |   |    |     |    |     |   |   |   |    |     |   |    |   |



|                                                                                                                                                                                                                       |    |    |     |     |     |    |    |    |    |    |    |    |    |     |    |    |    |     |    |    |   |    |     |    |     |     |   |     |
|-----------------------------------------------------------------------------------------------------------------------------------------------------------------------------------------------------------------------|----|----|-----|-----|-----|----|----|----|----|----|----|----|----|-----|----|----|----|-----|----|----|---|----|-----|----|-----|-----|---|-----|
| Otu0220                                                                                                                                                                                                               | 0  | 0  | 0   | 0   | 0   | 0  | 0  | 0  | 0  | 0  | 0  | 0  | 0  | 0   | 0  | 0  | 0  | 0   | 0  | 0  | 0 | 3  | 0   | 0  | 0   | 0   | 9 | 0   |
|                                                                                                                                                                                                                       | 0  | 0  | 0   | 0   | 0   | 6  | 0  | 0  | 0  | 0  | 0  | 28 | 0  | 0   | 0  | 0  | 0  | 0   | 0  | 0  | 0 | 0  | 130 | 0  | 1   | 0   | 0 | 0   |
|                                                                                                                                                                                                                       | 0  | 0  | 0   | 0   | 0   | 0  | 0  | 0  | 0  | 0  | 0  | 0  | 0  | 0   | 0  | 0  | 0  | 0   | 0  | 0  | 0 | 3  | 0   | 0  | 0   | 0   | 0 | 0   |
|                                                                                                                                                                                                                       | 0  | 0  | 0   | 0   | 0   | 0  | 0  | 0  | 0  | 0  | 0  | 0  | 0  | 0   | 0  | 0  | 0  | 0   | 0  | 0  | 0 | 0  | 0   | 0  | 0   | 0   | 0 | 0   |
| M02255_76_000000000-ADUNE_1_1112_27852_12092 T---AC---GT-AG-GGG-----GCG-A-G-----C-G-T---T-GT-C-CGG-AT-----TT-A--T-T-GG-GC-----GT--A---AA-GA-GC-TC-----G-TA-----G-----G--C-TT-G-G-C-----                               |    |    |     |     |     |    |    |    |    |    |    |    |    |     |    |    |    |     |    |    |   |    |     |    |     |     |   |     |
| ---AA---G-T-C-G-----G-G-T--G--TG--A-AA-CC--T-C-CA-G-G----CT-C-AA-----C-C-T-G-G-A-G--A-----C-G-CC-A--C-T-----C--GA-T-A--C-----T-G-C--TA-TG-G-C---T-A-G-A-G-T--C--C-GG---TA-G-G-----G-G-A-C---CA-C-----GG--A--ATT---C-  |    |    |     |     |     |    |    |    |    |    |    |    |    |     |    |    |    |     |    |    |   |    |     |    |     |     |   |     |
| C-T-G-GT--GT-A-G-CG-GT--G---A-A-A---TG-C-GC-AG--AT-A-TC--A-G--G-A-G-G-A-AC-A-CC---GG--T--G--GC-GAA-G--G-C-G-----G-T-G-G-T---CTG--G--GC-C-G-----G-C--A-C-T--GA--CG-C-T-G--A-GG--A-G-CG-A--AA-G-C---G-TG--GG-           |    |    |     |     |     |    |    |    |    |    |    |    |    |     |    |    |    |     |    |    |   |    |     |    |     |     |   |     |
| T--AG-C-A-AA-----CA--GG Bacteria(100);Actinobacteria(100);Actinobacteria(100);unclassified(54);unclassified(54);unclassified(54);unclassified(54);unclassified(54);unclassified(54);                                  |    |    |     |     |     |    |    |    |    |    |    |    |    |     |    |    |    |     |    |    |   |    |     |    |     |     |   |     |
| Otu0221                                                                                                                                                                                                               | 0  | 0  | 0   | 0   | 0   | 0  | 0  | 0  | 0  | 0  | 0  | 0  | 0  | 0   | 0  | 0  | 0  | 0   | 0  | 0  | 0 | 0  | 0   | 0  | 12  | 1   | 0 | 0   |
|                                                                                                                                                                                                                       | 1  | 0  | 0   | 0   | 0   | 0  | 37 | 33 | 0  | 9  | 2  | 0  | 0  | 0   | 0  | 12 | 73 | 0   | 0  | 0  | 0 | 0  | 0   | 0  | 0   | 0   | 0 | 0   |
|                                                                                                                                                                                                                       | 37 | 0  | 0   | 0   | 0   | 0  | 0  | 1  | 0  | 0  | 0  | 0  | 0  | 51  | 11 | 19 | 0  | 141 | 18 | 0  | 0 | 0  | 0   | 54 | 0   | 640 | 0 | 176 |
|                                                                                                                                                                                                                       | 0  | 44 | 122 | 369 | 337 | 0  | 17 | 0  | 0  | 0  | 0  | 26 | 0  | 118 | 0  | 0  | 5  | 0   | 0  | 0  | 0 | 0  | 0   | 0  | 0   | 0   | 0 | 0   |
| M02255_77_000000000-ADUT3_1_1110_5520_10047 T---AC---GT-AG-GGT-----GCA-A-G-----C-G-T---T--AT-C-CGG-AA-----TT-A--T-T-GG-GC-----GT--A---AA-GG-GC-TC-----G-TA-G-G-C-G-----G--T-T-C-G-T-C-----GC-                         |    |    |     |     |     |    |    |    |    |    |    |    |    |     |    |    |    |     |    |    |   |    |     |    |     |     |   |     |
| ---G-T-C-C-----G-G-T--G--TG--A-AA-GT--C-C-AT-C-G----CT-T-AA-----C-G-G-T-G-G-A--T-C---C-G--C-G--C-C-----G--GG-T-A--C-----G--G-G--CG--G-G-C---T-T-G-A-G-T--G--C-GG---TA-G-G-----G-G-A-G--AC-T-----GG--A--ATT---C-C-C-G- |    |    |     |     |     |    |    |    |    |    |    |    |    |     |    |    |    |     |    |    |   |    |     |    |     |     |   |     |
| GT--GT-A-A-CG-GT--G---G--A-A---TG-T-GT-AG--AT-A-TC--G-G--G-A-A-G-A-AC-A-CC---AA--T--G--GC-GAA-G--G-C-A-----G--G-T-C-T---CTG--G--GC-C-G-----T-T--A-C-T--GA--CG-C-T-G--A-GG--A-G-CG-A--AA-G-C---G-TG--GG-G--AG-         |    |    |     |     |     |    |    |    |    |    |    |    |    |     |    |    |    |     |    |    |   |    |     |    |     |     |   |     |
| C-G-AA-----CA--GG Bacteria(100);Actinobacteria(100);Actinobacteria(100);Actinobacteridae(100);Bifidobacteriales(100);Bifidobacteriaceae(100);Bifidobacterium(100);unclassified(100);unclassified(100);                |    |    |     |     |     |    |    |    |    |    |    |    |    |     |    |    |    |     |    |    |   |    |     |    |     |     |   |     |
| Otu0222                                                                                                                                                                                                               | 0  | 0  | 0   | 0   | 0   | 0  | 0  | 0  | 0  | 0  | 0  | 0  | 0  | 0   | 0  | 0  | 0  | 0   | 0  | 0  | 0 | 0  | 0   | 0  | 0   | 0   | 0 | 0   |
|                                                                                                                                                                                                                       | 0  | 0  | 0   | 0   | 0   | 0  | 0  | 0  | 0  | 0  | 0  | 0  | 0  | 0   | 0  | 0  | 0  | 0   | 0  | 0  | 0 | 0  | 0   | 0  | 0   | 0   | 0 | 0   |
|                                                                                                                                                                                                                       | 0  | 0  | 0   | 0   | 0   | 0  | 0  | 0  | 0  | 0  | 0  | 0  | 0  | 0   | 0  | 0  | 0  | 0   | 0  | 0  | 0 | 0  | 0   | 0  | 0   | 0   | 0 | 0   |
|                                                                                                                                                                                                                       | 0  | 0  | 0   | 84  | 0   | 0  | 14 | 0  | 0  | 0  | 0  | 0  | 0  | 0   | 0  | 0  | 0  | 0   | 0  | 0  | 0 | 0  | 0   | 0  | 0   | 0   | 0 | 0   |
| M02255_77_000000000-ADUT3_1_1103_12435_10329 T---AC---GA-AG-GGG-----GCT-A-G-----C-G-T---T--GC-T-CGG-AA-----TG-A--C-T-GG-GC-----GT--A---AA-GG-GC-GC-----G-TA-G-G-C-G-----G--C-GG-C-C-A---                              |    |    |     |     |     |    |    |    |    |    |    |    |    |     |    |    |    |     |    |    |   |    |     |    |     |     |   |     |
| -----AA---G-T-C-A-----G-A-C--G--TG--A-AA-TT--C-C-TG-G-G----CT-C-AA-----C-C-T-G-G-G-G--G-C---T-G--C-G--T-T-----T--GA-T-A--C-----T-T-G-GT-T-G-C---T-T-G-A-G-T--G--G-GG---AA-G-A-----G-G-G-T---CG-T-----GG--A--ATT---    |    |    |     |     |     |    |    |    |    |    |    |    |    |     |    |    |    |     |    |    |   |    |     |    |     |     |   |     |
| C-C-C-A-GT--GT-A-G-AG-GT--G---A-A-A---TT-C-GT-AG--AT-A-TT--G-G--G-A-A-G-A-AC-A-CC---GG--T--G--GC-GAA-G--G-C-G-----G--C-G-A-C---CTG--G--TC-C-T-----T-G--A-C-T--GA--CG-C-T-G--A-GG--C-G-CG-A--AA-G-C---G-TG--GG-G--AG-  |    |    |     |     |     |    |    |    |    |    |    |    |    |     |    |    |    |     |    |    |   |    |     |    |     |     |   |     |
| GG-G--AG-C-A-AA-----CA--GG Bacteria(100);Proteobacteria(100);Alphaproteobacteria(100);Rhodospirillales(100);Acetobacteraceae(100);unclassified(100);unclassified(100);unclassified(100);unclassified(100);            |    |    |     |     |     |    |    |    |    |    |    |    |    |     |    |    |    |     |    |    |   |    |     |    |     |     |   |     |
| Otu0223                                                                                                                                                                                                               | 0  | 0  | 0   | 0   | 15  | 32 | 2  | 0  | 0  | 22 | 48 | 0  | 0  | 11  | 11 | 0  | 0  | 0   | 0  | 0  | 0 | 0  | 84  | 0  | 200 | 133 | 2 | 15  |
|                                                                                                                                                                                                                       | 0  | 2  | 0   | 0   | 0   | 0  | 0  | 17 | 11 | 0  | 0  | 0  | 63 | 0   | 1  | 14 | 59 | 3   | 7  | 14 | 7 | 0  | 12  | 0  | 0   | 1   | 0 | 5   |
|                                                                                                                                                                                                                       | 0  | 0  | 0   | 0   | 0   | 0  | 0  | 0  | 0  | 0  | 0  | 0  | 0  | 0   | 0  | 0  | 0  | 0   | 0  | 0  | 0 | 14 | 22  | 19 | 0   | 0   | 0 | 0   |
|                                                                                                                                                                                                                       | 38 |    |     |     |     |    |    |    |    |    |    |    |    |     |    |    |    |     |    |    |   |    |     |    |     |     |   |     |



|                                                                                                                                                                                                                               |    |     |     |    |   |   |     |     |     |    |     |     |   |   |    |    |    |    |    |   |   |    |   |     |   |   |    |    |
|-------------------------------------------------------------------------------------------------------------------------------------------------------------------------------------------------------------------------------|----|-----|-----|----|---|---|-----|-----|-----|----|-----|-----|---|---|----|----|----|----|----|---|---|----|---|-----|---|---|----|----|
| Otu0225                                                                                                                                                                                                                       | 0  | 0   | 0   | 0  | 0 | 0 | 0   | 0   | 0   | 0  | 0   | 0   | 0 | 0 | 0  | 0  | 0  | 0  | 0  | 0 | 0 | 0  | 5 | 0   | 0 | 0 | 0  | 6  |
|                                                                                                                                                                                                                               | 0  | 0   | 0   | 0  | 0 | 0 | 0   | 0   | 0   | 0  | 25  | 0   | 0 | 0 | 0  | 0  | 0  | 0  | 0  | 0 | 0 | 0  | 0 | 14  | 0 | 0 | 0  | 0  |
|                                                                                                                                                                                                                               | 0  | 27  | 4   | 0  | 0 | 0 | 0   | 0   | 4   | 0  | 0   | 0   | 6 | 0 | 0  | 10 | 16 | 3  | 0  | 0 | 0 | 0  | 0 | 28  | 0 | 0 | 0  | 21 |
|                                                                                                                                                                                                                               | 0  | 0   | 0   | 0  | 0 | 0 | 0   | 0   | 0   | 0  | 0   | 0   | 0 | 0 | 0  | 0  | 0  | 0  | 0  | 0 | 0 | 0  | 0 | 0   | 0 | 0 |    |    |
| M02255_77_000000000-ADUT3_1_1112_11485_8143 T---AC---GA-AG-GGG-----GCT-A-G-----C--G--T---T--GT-T-CGG-AT-----TT-A--C-T--GG-GC-----GT--A-----AA-GC-GC-AC-----G-TA-G-G-C-G-----G--T-TT-G-T-T-----AA--                            |    |     |     |    |   |   |     |     |     |    |     |     |   |   |    |    |    |    |    |   |   |    |   |     |   |   |    |    |
| ---G-T-G-A-----G-A-G--G-TG--A-AA-TC--C-C-AG-A-G-----CT-C-AA-----C-T-C-T-G-G-A--A-C---T-G--C-C---T-T-----T--CA-T-A--C-----T--G-G--CA--A-G-C---T-A-G-A-G-T--C---C-GG-----AA-G-A-----G-G-T-A--AG-T-----GG--A--ACT----C-C-T-A-    |    |     |     |    |   |   |     |     |     |    |     |     |   |   |    |    |    |    |    |   |   |    |   |     |   |   |    |    |
| GT--GT-A-G-AG-GT--G---G--A-A---TT-C-GT-AG--AT-A-TT--A-G--G-A-A-G-A-AC-A-CC---AG--T--G--GC-GAA-G--G-C-G-----G--C-T-T-A---CTG--G--TC-C-G-----G-A--A-C-T--GA--CG-C-T-G--A-GG--T-G-CG-A--AA-G-C---G-TG--GG-G--AG-                 |    |     |     |    |   |   |     |     |     |    |     |     |   |   |    |    |    |    |    |   |   |    |   |     |   |   |    |    |
| C-A-AA-----CA--GG Bacteria(100);Proteobacteria(100);Alphaproteobacteria(100);Rhizobiales(100);unclassified(85);unclassified(85);unclassified(85);unclassified(85);unclassified(85);                                           |    |     |     |    |   |   |     |     |     |    |     |     |   |   |    |    |    |    |    |   |   |    |   |     |   |   |    |    |
| Otu0226                                                                                                                                                                                                                       | 0  | 209 | 0   | 0  | 0 | 0 | 0   | 0   | 65  | 0  | 0   | 0   | 0 | 0 | 0  | 0  | 0  | 0  | 0  | 0 | 0 | 4  | 0 | 0   | 0 | 0 | 0  |    |
|                                                                                                                                                                                                                               | 0  | 0   | 0   | 0  | 0 | 0 | 0   | 0   | 0   | 0  | 106 | 0   | 0 | 0 | 0  | 0  | 0  | 0  | 0  | 0 | 0 | 0  | 0 | 0   | 0 | 1 | 0  | 0  |
|                                                                                                                                                                                                                               | 0  | 0   | 0   | 0  | 0 | 0 | 0   | 0   | 0   | 0  | 0   | 0   | 0 | 0 | 20 | 0  | 0  | 0  | 0  | 0 | 0 | 0  | 0 | 0   | 0 | 0 | 0  |    |
|                                                                                                                                                                                                                               | 18 | 0   | 0   | 3  | 0 | 0 | 2   | 0   | 0   | 0  | 0   | 0   | 0 | 0 | 0  | 0  | 0  | 0  | 0  | 0 | 0 | 0  | 0 | 1   | 0 | 0 |    |    |
| M02255_77_000000000-ADUT3_1_2117_25636_14286 T---AC---GT-AG-GGG-----GCA-A-G-----C--G--T---T--AT-C-CGG-AT-----TT-A--C-T--GG-GT-----GT--A-----AA-GG-GA-GC-----G-TA-G-A-C-G-----G--T-TA-A-G-C-----                               |    |     |     |    |   |   |     |     |     |    |     |     |   |   |    |    |    |    |    |   |   |    |   |     |   |   |    |    |
| -----AA---G-T-C-A-----G-A-A--G-TG--A-AA-GG--C-T-GG-G-G-----CT-C-AA-----C-C-C-C-G-G-G--A-C---T-G--C-T---T-T-----T--GA-A-A--C-----T--G-T--TT--A-A-C---T-A-G-A-G-T--G---C-TG-----GA-G-A-----G-G-T-A--AG-C-----GG--A--ATT----C-   |    |     |     |    |   |   |     |     |     |    |     |     |   |   |    |    |    |    |    |   |   |    |   |     |   |   |    |    |
| C-T-A-GT--GT-A-G-CG-GT--G---A--A---TG-C-GT-AG--AT-A-TT--A-G--G-A-G-G-A-AC-A-CC---AG--T--G--GC-GAA-G--G-C-G-----G--C-T-T-A---CTG--G--AC-A-G-----T-A--A-C-T--GA--CG-T-T-G--A-GG--C-T-CG-A--AA-G-C---G-TG--GG-G-                 |    |     |     |    |   |   |     |     |     |    |     |     |   |   |    |    |    |    |    |   |   |    |   |     |   |   |    |    |
| -AG-C-A-AA-----CA--GG Bacteria(100);Firmicutes(100);Clostridia(100);Clostridiales(100);Lachnospiraceae(100);unclassified(100);unclassified(100);unclassified(100);unclassified(100);                                          |    |     |     |    |   |   |     |     |     |    |     |     |   |   |    |    |    |    |    |   |   |    |   |     |   |   |    |    |
| Otu0227                                                                                                                                                                                                                       | 0  | 0   | 0   | 0  | 0 | 0 | 0   | 0   | 0   | 0  | 0   | 0   | 0 | 0 | 0  | 0  | 0  | 0  | 0  | 0 | 0 | 0  | 0 | 0   | 0 | 0 | 0  |    |
|                                                                                                                                                                                                                               | 0  | 0   | 0   | 0  | 0 | 0 | 0   | 0   | 0   | 0  | 0   | 0   | 0 | 0 | 0  | 0  | 0  | 0  | 0  | 0 | 0 | 53 | 0 | 8   | 2 | 0 | 0  | 0  |
|                                                                                                                                                                                                                               | 0  | 0   | 0   | 0  | 0 | 0 | 0   | 0   | 0   | 0  | 0   | 0   | 0 | 0 | 0  | 0  | 0  | 0  | 0  | 0 | 0 | 0  | 0 | 0   | 0 | 0 | 0  |    |
|                                                                                                                                                                                                                               | 0  | 0   | 0   | 0  | 0 | 0 | 0   | 17  | 0   | 0  | 0   | 0   | 0 | 0 | 0  | 0  | 0  | 0  | 0  | 0 | 0 | 0  | 0 | 0   | 0 | 0 |    |    |
| M02255_76_000000000-ADUNE_1_2119_17678_6995 C---GG---CT-AA-CTC-----CGT-T-C-----C--A--G---C--AG-C-CGC-GG-----TA-A--T-A--CG-GA-----GG--A-----TC-CA-AG-CG-----T-TA-T-C-C-G-----GA-T-TT-A-T-T-----AA--                            |    |     |     |    |   |   |     |     |     |    |     |     |   |   |    |    |    |    |    |   |   |    |   |     |   |   |    |    |
| --G-T-C-A-----G-G-G--G--TG--A-AA-GA--C-G-GT-G-G-----CT-C-AA-----C-C-A-T-C-G-C--A-G---T-G--C-C---C-T-----T--GA-T-A--C-----T--G-A-TG--A-G-C---T-T-G-A-A-T--A--C-AC-----TA-G-A-----G-G-T-A--GG-C-----GG--A--ATG---T-G-A-C-       |    |     |     |    |   |   |     |     |     |    |     |     |   |   |    |    |    |    |    |   |   |    |   |     |   |   |    |    |
| AA--GT-A-G-CG-GT--G---A--A---TG-C-AT-AG--AT-A-TG--T-C--A-C-A-G-A-AC-A-CC---GA--T--T--GC-GAA-G--G-C-A-----G--C-T-T-A---CTA--T--GG-T-G-----T-T--A-T-T--GA--CG-C-T-G--A-GG--C-A-CG-A--AA-G-C---G-TG--GG-G--AT-C-                 |    |     |     |    |   |   |     |     |     |    |     |     |   |   |    |    |    |    |    |   |   |    |   |     |   |   |    |    |
| A-AA-----CA--GG Bacteria(100);Bacteroidetes(100);Sphingobacteria(100);Sphingobacteriales(100);Sphingobacteriaceae(100);Sphingobacteriaceae(100);Pedobacter(100);unclassified(100);unclassified(100);                          |    |     |     |    |   |   |     |     |     |    |     |     |   |   |    |    |    |    |    |   |   |    |   |     |   |   |    |    |
| Otu0228                                                                                                                                                                                                                       | 0  | 14  | 0   | 0  | 5 | 0 | 0   | 0   | 0   | 0  | 0   | 0   | 0 | 0 | 0  | 0  | 0  | 0  | 0  | 0 | 0 | 0  | 0 | 0   | 0 | 0 | 0  |    |
|                                                                                                                                                                                                                               | 0  | 0   | 5   | 0  | 0 | 0 | 0   | 0   | 0   | 0  | 0   | 0   | 0 | 0 | 0  | 0  | 0  | 0  | 0  | 0 | 0 | 0  | 0 | 0   | 0 | 0 | 0  |    |
|                                                                                                                                                                                                                               | 0  | 0   | 0   | 0  | 0 | 0 | 0   | 0   | 0   | 0  | 0   | 0   | 0 | 0 | 0  | 0  | 0  | 0  | 10 | 0 | 0 | 0  | 0 | 0   | 0 | 0 | 17 | 0  |
|                                                                                                                                                                                                                               | 0  | 0   | 0   | 0  | 0 | 8 | 0   | 3   | 0   | 0  | 0   | 0   | 2 | 0 | 0  | 0  | 0  | 0  | 0  | 0 | 0 | 0  | 0 | 0   | 0 | 0 |    |    |
| M02255_77_000000000-ADUT3_1_2111_22027_15100 T---AC---GT-AG-GGT-----GCG-A-G-----C--G--T---T--GT-T-CGG-AA-----TT-A--T-T--GG-GC-----GT--A-----AA-GA-GC-TT-----G-TA-G-G-C-G-----G--T-TT-G-T-C-----                               |    |     |     |    |   |   |     |     |     |    |     |     |   |   |    |    |    |    |    |   |   |    |   |     |   |   |    |    |
| -----GC---G-T-C-T-----G-C-T--G--TG--A-AA-AT--T-C-AG-G-G-----CT-T-AA-----C-C-C-T-G-G-A--C-G---T-G--C-A--G--T-----G--GG-T-A--C-----G--G-G--CA--G-A-C---T-A-G-A-G-T--A---T-GG-----TA-G-G-----G-G-A-G---AC-T-----GG--A--ATT----C- |    |     |     |    |   |   |     |     |     |    |     |     |   |   |    |    |    |    |    |   |   |    |   |     |   |   |    |    |
| C-T-G-GT--GT-A-G-CG-GT--G---G--A-A---TG-C-GC-AG--AT-A-TC--A-G--G-A-G-G-A-AC-A-CC---GA--T--G--GC-GAA-G--G-C-A-----G--G-T-C-T---CTG--G--GC-C-A-----T-T--A-C-T--GA--CG-C-T-G--A-GA--A-G-CG-A--AA-G-C---A-TG--GG-                 |    |     |     |    |   |   |     |     |     |    |     |     |   |   |    |    |    |    |    |   |   |    |   |     |   |   |    |    |
| G--AG-C-G-AA-----CA--GG Bacteria(100);Actinobacteria(100);Actinobacteria(100);Actinobacteridae(100);Actinomycetales(100);Micrococcineae(100);unclassified(100);unclassified(100);unclassified(100);                           |    |     |     |    |   |   |     |     |     |    |     |     |   |   |    |    |    |    |    |   |   |    |   |     |   |   |    |    |
| Otu0229                                                                                                                                                                                                                       | 51 | 247 | 330 | 0  | 0 | 0 | 351 | 109 | 210 | 0  | 0   | 0   | 0 | 0 | 0  | 0  | 2  | 0  | 0  | 0 | 0 | 0  | 2 | 0   | 0 | 0 | 7  | 0  |
|                                                                                                                                                                                                                               | 4  | 0   | 0   | 0  | 0 | 8 | 0   | 0   | 7   | 0  | 37  | 184 | 0 | 0 | 47 | 0  | 3  | 0  | 0  | 0 | 0 | 0  | 1 | 4   | 0 | 0 | 1  |    |
|                                                                                                                                                                                                                               | 0  | 0   | 0   | 3  | 0 | 0 | 0   | 0   | 0   | 0  | 4   | 0   | 0 | 1 | 9  | 3  | 0  | 60 | 0  | 0 | 0 | 0  | 0 | 0   | 0 | 0 | 0  | 28 |
|                                                                                                                                                                                                                               | 0  | 0   | 0   | 13 | 0 | 0 | 0   | 0   | 0   | 35 | 0   | 82  | 0 | 0 | 0  | 27 | 0  | 0  | 0  | 0 | 0 | 0  | 4 | 252 | 0 | 0 |    |    |
| M02255_77_000000000-ADUT3_1_1111_15986_15272 T---AC---GT-AG-GGG-----GCA-A-G-----C--G--T---T--AT-C-CGG-AT-----TT-A--C-T--GG-GT-----GT--A-----AA-GG-GA-GC-----G-TA-G-A-C-G-----G--T-GT-G-G-C-----                               |    |     |     |    |   |   |     |     |     |    |     |     |   |   |    |    |    |    |    |   |   |    |   |     |   |   |    |    |
| -----AA---G-T-C-T-----G-A-T--G--TG--A-AA-GG--C-A-TG-G-G-----CT-C-AA-----C-C-T-G-T-G-G--A-C---T-G--C-A--T--T-----G--GA-A-A--C-----T--G-T--CA--T-A-C---T-T-G-A-G-T--G---C-CG-----GA-G-G-----G-G-T-A--AG-C-----GG--A--ATT----    |    |     |     |    |   |   |     |     |     |    |     |     |   |   |    |    |    |    |    |   |   |    |   |     |   |   |    |    |
| C-C-T-A-GT--GT-A-G-CG-GT--G---A--A---TG-C-GT-AG--AT-A-TT--A-G--G-A-G-G-A-AC-A-CC---AG--T--G--GC-GAA-G--G-C-G-----G--C-T-T-A---CTG--G--AC-G-G-----T-A--A-C-T--GA--CG-T-T-G--A-GG--C-T-CG-A--AA-G-C---G-TG--GG-                 |    |     |     |    |   |   |     |     |     |    |     |     |   |   |    |    |    |    |    |   |   |    |   |     |   |   |    |    |
| G--AG-C-A-AA-----CA--GG Bacteria(100);Firmicutes(100);Clostridia(100);Clostridiales(100);Lachnospiraceae(100);Blautia(100);unclassified(100);unclassified(100);unclassified(100);                                             |    |     |     |    |   |   |     |     |     |    |     |     |   |   |    |    |    |    |    |   |   |    |   |     |   |   |    |    |



|                                                                                                                                                                                                                            |    |   |   |    |   |   |    |    |   |    |    |    |    |     |    |   |   |   |    |    |   |    |   |    |   |    |   |
|----------------------------------------------------------------------------------------------------------------------------------------------------------------------------------------------------------------------------|----|---|---|----|---|---|----|----|---|----|----|----|----|-----|----|---|---|---|----|----|---|----|---|----|---|----|---|
| Otu0230                                                                                                                                                                                                                    | 7  | 0 | 0 | 0  | 0 | 0 | 0  | 5  | 0 | 0  | 0  | 0  | 0  | 0   | 0  | 0 | 0 | 0 | 0  | 0  | 1 | 0  | 0 | 0  | 0 | 0  | 0 |
|                                                                                                                                                                                                                            | 0  | 6 | 0 | 1  | 3 | 0 | 0  | 0  | 0 | 11 | 0  | 0  | 1  | 2   | 12 | 8 | 0 | 0 | 0  | 0  | 6 | 2  | 0 | 0  | 0 | 0  | 1 |
|                                                                                                                                                                                                                            | 0  | 0 | 0 | 1  | 0 | 0 | 0  | 0  | 0 | 0  | 0  | 0  | 0  | 0   | 0  | 0 | 0 | 0 | 1  | 0  | 0 | 0  | 0 | 0  | 0 | 0  |   |
|                                                                                                                                                                                                                            | 0  | 0 | 0 | 0  | 0 | 0 | 0  | 0  | 0 | 0  | 5  | 0  | 2  | 0   | 0  | 0 | 0 | 0 | 2  | 0  | 4 | 0  | 0 | 0  | 0 | 0  |   |
| M02255_77_000000000-ADUT3_1_2113_22738_22937                                                                                                                                                                               |    |   |   |    |   |   |    |    |   |    |    |    |    |     |    |   |   |   |    |    |   |    |   |    |   |    |   |
| .....AC---T-AC-GT-----GCC-A-G-----C--A--G---C--CG-C-GGT-AA-----TA-C--G-T--AG-GT-----GG--C-----AA---GC-G-----T-TA-T-C-C-G-----G--T-TT-A-T-T-----                                                                            |    |   |   |    |   |   |    |    |   |    |    |    |    |     |    |   |   |   |    |    |   |    |   |    |   |    |   |
| AA---G-T-C-T-----G-A-T--G--TG--A-AA-GC--C-C-AC-G-G-----CT-C-AA-----C-C-G-T-G-G-A--G-----G-GT-C-A--T--T-----G--GA-A-A--C-----T--G-G--AA--A-A-C---T-T-G-A-G-T--G---C-AG-----AA-G-A-----G-G-A-A--AG-T-----GG--A--ATT---C-C-   |    |   |   |    |   |   |    |    |   |    |    |    |    |     |    |   |   |   |    |    |   |    |   |    |   |    |   |
| A-T-GT--GT-A-G-CG-GT--G---A--A-A---TG-C-GC-AG--AG-A-TA--T-G--G-A-G-G-A-AC-A-CC---AG--T--G--GC-GAA-G--G-C-G-----A--C-T-T-T---CTG--G--TC-T-G-----T-A---A-C-T--GA--CG-C-T-G--A-TG--T-G-CG-A--AA-G-C---G-TG--GG-G--            |    |   |   |    |   |   |    |    |   |    |    |    |    |     |    |   |   |   |    |    |   |    |   |    |   |    |   |
| AT-C-A-AA-----CA--GG                                                                                                                                                                                                       |    |   |   |    |   |   |    |    |   |    |    |    |    |     |    |   |   |   |    |    |   |    |   |    |   |    |   |
| Bacteria(100);Firmicutes(100);Bacilli(100);Bacillales(100);Staphylococcaceae(100);Staphylococcus(91);unclassified(91);unclassified(91);unclassified(91);                                                                   |    |   |   |    |   |   |    |    |   |    |    |    |    |     |    |   |   |   |    |    |   |    |   |    |   |    |   |
| Otu0231                                                                                                                                                                                                                    | 0  | 0 | 0 | 0  | 0 | 0 | 0  | 0  | 0 | 0  | 0  | 0  | 0  | 0   | 0  | 0 | 0 | 0 | 0  | 0  | 0 | 0  | 0 | 0  | 0 | 0  |   |
|                                                                                                                                                                                                                            | 0  | 0 | 0 | 0  | 0 | 0 | 0  | 0  | 0 | 0  | 0  | 0  | 36 | 0   | 0  | 0 | 0 | 0 | 0  | 0  | 0 | 0  | 0 | 0  | 0 | 0  |   |
|                                                                                                                                                                                                                            | 0  | 0 | 0 | 0  | 0 | 0 | 0  | 0  | 0 | 0  | 0  | 0  | 0  | 0   | 0  | 0 | 0 | 0 | 0  | 0  | 0 | 0  | 0 | 56 | 0 | 49 |   |
|                                                                                                                                                                                                                            | 11 | 0 | 0 | 0  | 0 | 0 | 0  | 0  | 0 | 0  | 20 | 2  | 0  | 0   | 0  | 0 | 0 | 0 | 0  | 0  | 0 | 0  | 0 | 0  | 0 | 0  |   |
| M02255_77_000000000-ADUT3_1_1117_12140_13977                                                                                                                                                                               |    |   |   |    |   |   |    |    |   |    |    |    |    |     |    |   |   |   |    |    |   |    |   |    |   |    |   |
| T---AC--GT-AG-GGG-----GCA-A-G-----C--G--T--T--AT-C-CGG-AT-----TT-A--C-T--GG-GT-----GT--A-----AA-GG-GA-GC-----G-TA-G-A-C-G-----G--A-GC-A-G-C---                                                                             |    |   |   |    |   |   |    |    |   |    |    |    |    |     |    |   |   |   |    |    |   |    |   |    |   |    |   |
| -----AA---G-T-C-T-----G-A-T--G--TG--A-AA-GG--C-A-GG-G-G-----CT-C-AA-----C-C-C-C-T-G-G--A-C---T-G--C-A--T--T-----G--GA-A-A--C-----T--G-T--TG--A-T-C---T-T-G-A-G-T--A--C-CG-----GA-G-G-----G-G-T-A--AG-C-----GG--A--ATT---   |    |   |   |    |   |   |    |    |   |    |    |    |    |     |    |   |   |   |    |    |   |    |   |    |   |    |   |
| C-C-T-A-GT--GT-A-G-CG-GT--G---A--A-A---TG-C-GT-AG--AT-A-TT--A-G--G-A-G-G-A-AC-A-CC---AG--T--G--GC-GAA-G--G-C-G-----G--C-T-T-A---CTG--G--AC-G-G-----T-A---A-C-T--GA--CG-T-T-G--A-GG--C-T-CG-A--AA-G-C---G-TG--GG-           |    |   |   |    |   |   |    |    |   |    |    |    |    |     |    |   |   |   |    |    |   |    |   |    |   |    |   |
| G--AG-C-A-AA-----CA--GG                                                                                                                                                                                                    |    |   |   |    |   |   |    |    |   |    |    |    |    |     |    |   |   |   |    |    |   |    |   |    |   |    |   |
| Bacteria(100);Firmicutes(100);Clostridia(100);Clostridiales(100);Lachnospiraceae(100);unclassified(63);unclassified(63);unclassified(63);unclassified(63);                                                                 |    |   |   |    |   |   |    |    |   |    |    |    |    |     |    |   |   |   |    |    |   |    |   |    |   |    |   |
| Otu0232                                                                                                                                                                                                                    | 0  | 0 | 0 | 0  | 0 | 0 | 0  | 0  | 0 | 0  | 0  | 18 | 0  | 0   | 0  | 0 | 0 | 0 | 6  | 0  | 0 | 0  | 0 | 0  | 6 | 0  |   |
|                                                                                                                                                                                                                            | 0  | 0 | 0 | 0  | 0 | 0 | 0  | 0  | 0 | 0  | 0  | 0  | 0  | 0   | 0  | 0 | 0 | 0 | 0  | 0  | 2 | 0  | 0 | 0  | 0 | 0  |   |
|                                                                                                                                                                                                                            | 0  | 0 | 0 | 0  | 0 | 0 | 0  | 0  | 0 | 0  | 0  | 0  | 0  | 0   | 0  | 0 | 0 | 0 | 0  | 0  | 1 | 19 | 0 | 0  | 0 | 0  |   |
|                                                                                                                                                                                                                            | 0  | 0 | 0 | 0  | 0 | 0 | 0  | 29 | 0 | 3  | 0  | 1  | 0  | 0   | 0  | 0 | 0 | 0 | 0  | 0  | 0 | 0  | 1 | 0  | 0 | 0  |   |
| M02255_76_000000000-ADUNE_1_2115_18309_12961                                                                                                                                                                               |    |   |   |    |   |   |    |    |   |    |    |    |    |     |    |   |   |   |    |    |   |    |   |    |   |    |   |
| C---GG--CT-AA-CTC-----CGT-G-C-----C--A--G---C--AG-C-CGC-GG-----TA-A--T-A--CG-GA-----GG--G-----TG-CA-AG-CG-----T-TA-T-C-C-G-----G--A-CC-G-A-T-----                                                                          |    |   |   |    |   |   |    |    |   |    |    |    |    |     |    |   |   |   |    |    |   |    |   |    |   |    |   |
| -----AA---G-T-C-A-----G-T-G--G--TG--A-AA-TC--T-C-AT-A-G-----CT-T-AA-----C-T-A-T-G-A-A--A-C---T-G--C-C---A-T-----T--GA-T-A--C-----T--G-T--CG--G-T-C---T-T-G-A-G-T--A--A-AT-----TA-G-A-----G-G-T-A--GC-T-----GG--A--ATA---A- |    |   |   |    |   |   |    |    |   |    |    |    |    |     |    |   |   |   |    |    |   |    |   |    |   |    |   |
| G-T-A-GT--GT-A-G-CG-GT--G---A--A-A---TG-C-AT-AG--AT-A-TT--A-C--T-T-A-G-A-AC-A-CC---AA--T--T--GC-GAA-G--G-C-A-----G--G-T-T-A---CCA--T--GA-T-T-----T-A---A-C-T--GA--CG-C-T-G--A-GG--G-A-CG-A--AA-G-C---G-TG--GG-T--          |    |   |   |    |   |   |    |    |   |    |    |    |    |     |    |   |   |   |    |    |   |    |   |    |   |    |   |
| AG-C-G-AA-----CA--GG                                                                                                                                                                                                       |    |   |   |    |   |   |    |    |   |    |    |    |    |     |    |   |   |   |    |    |   |    |   |    |   |    |   |
| Bacteria(100);Bacteroidetes(100);Flavobacteria(100);Flavobacteriales(100);Flavobacteriaceae(100);unclassified(92);unclassified(92);unclassified(92);unclassified(92);                                                      |    |   |   |    |   |   |    |    |   |    |    |    |    |     |    |   |   |   |    |    |   |    |   |    |   |    |   |
| Otu0233                                                                                                                                                                                                                    | 0  | 0 | 0 | 11 | 2 | 2 | 0  | 0  | 0 | 0  | 0  | 0  | 0  | 0   | 0  | 0 | 0 | 0 | 0  | 0  | 1 | 0  | 0 | 0  | 0 | 0  |   |
|                                                                                                                                                                                                                            | 0  | 4 | 5 | 0  | 5 | 0 | 0  | 1  | 4 | 0  | 0  | 0  | 3  | 6   | 1  | 0 | 0 | 0 | 0  | 4  | 0 | 0  | 0 | 1  | 0 | 0  |   |
|                                                                                                                                                                                                                            | 0  | 0 | 0 | 0  | 0 | 0 | 0  | 0  | 0 | 0  | 0  | 0  | 0  | 0   | 0  | 0 | 2 | 0 | 0  | 0  | 1 | 0  | 0 | 0  | 0 | 3  |   |
|                                                                                                                                                                                                                            | 0  | 0 | 4 | 0  | 9 | 0 | 0  | 0  | 0 | 0  | 0  | 0  | 0  | 0   | 0  | 0 | 7 | 2 | 11 | 11 | 3 | 0  | 0 | 0  | 0 | 8  |   |
| M02255_77_000000000-ADUT3_1_2117_25801_13176                                                                                                                                                                               |    |   |   |    |   |   |    |    |   |    |    |    |    |     |    |   |   |   |    |    |   |    |   |    |   |    |   |
| A---AG---CC-AC-G-G-----CTA-A-C-----T--A--C---G--TG-C-CAG-CA-----GC-C--G-C--GG-TA-----AT--A-----CG-TA-GG-TG-----G-CA-A-G-C-G-----T--TGTC-C-G-G-----                                                                         |    |   |   |    |   |   |    |    |   |    |    |    |    |     |    |   |   |   |    |    |   |    |   |    |   |    |   |
| -----AT---G-T-A-T-----T-A-T--G--TG--A-AA-GC--C-C-CC-G-G-----CT-C-AA-----C-C-G-G-G-G-A--G-G---G-T--C-A--T--T-----G--GA-A-A--C-----T--G-G--GG--A-A-C---T-T-G-A-G-T--G---C-AG-----AA-G-A-----G-G-A-G--AG-T-----GG--A--ATT---  |    |   |   |    |   |   |    |    |   |    |    |    |    |     |    |   |   |   |    |    |   |    |   |    |   |    |   |
| C-C-A-T-GT--GT-A-G-CG-GT--G---A--A-A---TG-C-GT-AG--AT-A-TA--T-G--G-A-G-G-A-AC-A-CC---AG--T--G--GC-GAA-G--G-C-G-----A--C-T-C-T---CTG--G--TC-T-G-----T-A---A-C-T--GA--CG-C-T-G--A-GG--C-T-CG-A--AA-G-C---G-TG--GG-           |    |   |   |    |   |   |    |    |   |    |    |    |    |     |    |   |   |   |    |    |   |    |   |    |   |    |   |
| T--AG-C-A-AA-----CA--GG                                                                                                                                                                                                    |    |   |   |    |   |   |    |    |   |    |    |    |    |     |    |   |   |   |    |    |   |    |   |    |   |    |   |
| Bacteria(100);Firmicutes(100);Bacilli(100);Lactobacillales(90);unclassified(90);unclassified(90);unclassified(90);unclassified(90);unclassified(90);                                                                       |    |   |   |    |   |   |    |    |   |    |    |    |    |     |    |   |   |   |    |    |   |    |   |    |   |    |   |
| Otu0234                                                                                                                                                                                                                    | 0  | 0 | 0 | 0  | 0 | 0 | 0  | 0  | 0 | 0  | 0  | 0  | 0  | 0   | 0  | 0 | 0 | 0 | 0  | 0  | 0 | 0  | 0 | 0  | 0 | 0  |   |
|                                                                                                                                                                                                                            | 0  | 0 | 0 | 0  | 0 | 0 | 19 | 0  | 0 | 0  | 0  | 0  | 41 | 0   | 0  | 0 | 0 | 0 | 0  | 0  | 0 | 0  | 0 | 7  | 0 | 0  |   |
|                                                                                                                                                                                                                            | 0  | 0 | 0 | 0  | 0 | 0 | 0  | 0  | 0 | 0  | 0  | 0  | 0  | 111 | 13 | 0 | 0 | 0 | 0  | 0  | 0 | 0  | 0 | 0  | 0 | 0  |   |
|                                                                                                                                                                                                                            | 0  | 0 | 0 | 0  | 0 | 0 | 0  | 0  | 0 | 0  | 0  | 0  | 0  | 0   | 0  | 0 | 0 | 0 | 41 | 0  | 0 | 0  | 0 | 0  | 0 | 0  |   |
| M02255_77_000000000-ADUT3_1_1102_11073_5526                                                                                                                                                                                |    |   |   |    |   |   |    |    |   |    |    |    |    |     |    |   |   |   |    |    |   |    |   |    |   |    |   |
| T---AC--GT-AG-GTG-----GCA-A-G-----C--G--T--T--GT-C-CGG-AT-----TT-A--C-T--GG-GC-----GT--A-----AA-GG-GA-GC-----G-TA-G-G-T-G-----G--A-TA-T-T-T-----AA-                                                                        |    |   |   |    |   |   |    |    |   |    |    |    |    |     |    |   |   |   |    |    |   |    |   |    |   |    |   |
| ---G-T-G-G-----G-A-T--G--TG--A-AA-TA--C-T-CG-G-G-----CT-T-AA-----C-C-T-G-G-G-T--G-C---T-G--C-A--T--T-----C--CA-A-A--C-----T--G-G--AT--A-T-C---T-A-G-A-G-T--G---C-AG-----GA-G-A-----G-G-A-A--AG-T-----AG--A--ATT---C-C-T-A- |    |   |   |    |   |   |    |    |   |    |    |    |    |     |    |   |   |   |    |    |   |    |   |    |   |    |   |
| GT--GT-A-G-CG-GT--G---A--A-A---TG-C-GT-AG--AG-A-TT--A-G--G-A-A-G-A-AT-A-CC---AG--T--G--GC-GAA-G--G-C-G-----A--C-T-T-T---CTG--G--AC-T-G-----T-A---A-C-T--GA--CA-C-T-G--A-GG--C-T-CG-A--AA-G-C---G-TG--GG-G--AG-C-           |    |   |   |    |   |   |    |    |   |    |    |    |    |     |    |   |   |   |    |    |   |    |   |    |   |    |   |
| A-AA-----CA--GG                                                                                                                                                                                                            |    |   |   |    |   |   |    |    |   |    |    |    |    |     |    |   |   |   |    |    |   |    |   |    |   |    |   |
| Bacteria(100);Firmicutes(100);Clostridia(100);Clostridiales(100);Clostridiaceae(100);Clostridium(100);unclassified(100);unclassified(100);unclassified(100);                                                               |    |   |   |    |   |   |    |    |   |    |    |    |    |     |    |   |   |   |    |    |   |    |   |    |   |    |   |



|                                                                                                                                                                                                                            |    |     |     |    |   |    |     |     |     |    |     |   |    |    |   |   |     |    |     |     |   |    |   |    |     |    |    |   |
|----------------------------------------------------------------------------------------------------------------------------------------------------------------------------------------------------------------------------|----|-----|-----|----|---|----|-----|-----|-----|----|-----|---|----|----|---|---|-----|----|-----|-----|---|----|---|----|-----|----|----|---|
| Otu0235                                                                                                                                                                                                                    | 0  | 0   | 0   | 0  | 2 | 0  | 0   | 18  | 7   | 26 | 1   | 0 | 0  | 1  | 0 | 0 | 0   | 0  | 0   | 0   | 0 | 0  | 0 | 3  | 0   | 0  | 1  |   |
|                                                                                                                                                                                                                            | 0  | 0   | 0   | 0  | 0 | 0  | 0   | 0   | 1   | 0  | 0   | 0 | 0  | 0  | 0 | 0 | 0   | 1  | 3   | 0   | 0 | 11 | 0 | 0  | 0   | 0  |    |   |
|                                                                                                                                                                                                                            | 1  | 0   | 0   | 0  | 0 | 0  | 0   | 0   | 0   | 0  | 1   | 0 | 0  | 0  | 0 | 1 | 0   | 11 | 1   | 0   | 0 | 0  | 0 | 0  | 17  | 22 | 15 |   |
|                                                                                                                                                                                                                            | 0  | 0   | 0   | 15 | 0 | 0  | 0   | 0   | 0   | 0  | 0   | 0 | 18 | 0  | 0 | 0 | 0   | 0  | 1   | 0   | 0 | 0  | 0 | 3  | 0   | 0  |    |   |
| M02255_77_000000000-ADUT3_1_1110_27753_10806                                                                                                                                                                               |    |     |     |    |   |    |     |     |     |    |     |   |    |    |   |   |     |    |     |     |   |    |   |    |     |    |    |   |
| T---AC---GT-AG-GGT-----GCG-A-G-----C-G-T---T-GT-C-CGG-AA-----TT-A-C-T--GG-GC-----GT-A---AA-GA-GC-TC-----G-TA-G-G-T-G-----G--T-TT-G-T-C-----                                                                                |    |     |     |    |   |    |     |     |     |    |     |   |    |    |   |   |     |    |     |     |   |    |   |    |     |    |    |   |
| -----GC---G-T-C-G-----T-T-T--G--TG--T-AA-TA--C-C-GC-A-G-----CT-T-AA-----C-T-G-C-G-G-G--G-T---T-G--C-A--G-G-----C--GA-T-A--C-----G-G-G--CAT-A-A-C---T-T-G-A-G-T--G---C-TG-----TA-G-G-----G-G-A-G---AC-T-----GG--A--ATT---C- |    |     |     |    |   |    |     |     |     |    |     |   |    |    |   |   |     |    |     |     |   |    |   |    |     |    |    |   |
| C-T-G-GT--GT-A-G-CG-GT--G---G--A-A---TG-C-GC-AG--AT-A-TC--A-G--G-A-G-G-A-AC-A-CC---GA--T--G--GC-GAA-G--G-C-A-----G--G-T-C-T---CTG--G--GC-A-G-----T-A--A-C-T--GA--CG-C-T-G--A-GG--A-G-CG-A--AA-G-C---A-TG--GG-              |    |     |     |    |   |    |     |     |     |    |     |   |    |    |   |   |     |    |     |     |   |    |   |    |     |    |    |   |
| T--AG-C-G-AA-----CA--GG                                                                                                                                                                                                    |    |     |     |    |   |    |     |     |     |    |     |   |    |    |   |   |     |    |     |     |   |    |   |    |     |    |    |   |
| Bacteria(100);Actinobacteria(100);Actinobacteria(100);Actinobacteridae(100);Actinomycetales(100);Corynebacterineae(100);Corynebacteriaceae(100);Corynebacterium(100);unclassified(100);                                    |    |     |     |    |   |    |     |     |     |    |     |   |    |    |   |   |     |    |     |     |   |    |   |    |     |    |    |   |
| Otu0236                                                                                                                                                                                                                    | 0  | 123 | 174 | 0  | 0 | 0  | 254 | 104 | 446 | 0  | 0   | 0 | 0  | 1  | 0 | 0 | 0   | 0  | 0   | 0   | 0 | 0  | 1 | 0  | 0   | 0  | 0  |   |
|                                                                                                                                                                                                                            | 0  | 1   | 4   | 4  | 0 | 0  | 0   | 0   | 5   | 42 | 24  | 0 | 0  | 0  | 0 | 0 | 112 | 0  | 0   | 66  | 0 | 0  | 0 | 0  | 0   | 0  | 0  |   |
|                                                                                                                                                                                                                            | 0  | 0   | 0   | 0  | 0 | 0  | 0   | 0   | 0   | 0  | 0   | 0 | 0  | 0  | 0 | 0 | 0   | 0  | 0   | 0   | 0 | 0  | 0 | 0  | 773 | 0  | 0  |   |
|                                                                                                                                                                                                                            | 24 | 0   | 0   | 0  | 0 | 62 | 4   | 0   | 0   | 0  | 120 | 3 | 0  | 1  | 0 | 0 | 0   | 0  | 0   | 0   | 0 | 0  | 0 | 74 | 0   | 0  |    |   |
| M02255_77_000000000-ADUT3_1_1108_19776_12429                                                                                                                                                                               |    |     |     |    |   |    |     |     |     |    |     |   |    |    |   |   |     |    |     |     |   |    |   |    |     |    |    |   |
| T---AC---GT-AT-GGA-----GCA-A-G-----C-G-T---T-AT-C-CGG-AT-----TT-A-C-T--GG-GT-----GT-A---AA-GG-GT-GC-----G-TA-G-G-T-G-----G--C-AG-T-G-C-----                                                                                |    |     |     |    |   |    |     |     |     |    |     |   |    |    |   |   |     |    |     |     |   |    |   |    |     |    |    |   |
| -----AA---G-T-C-A-----G-A-T--G--TG--A-AA-GG--C-C-GG-G-G-----CT-C-AA-----C-C-C-C-G-G-A-G-C---T-G--C-A--T-T-----T-GA-A-A--C-----T-G-C--TC--G-G-C---T-A-G-A-G-T-A--C-AG---GA-G-A-----G-G-C-A--GG-C-----GG--A--ATT---          |    |     |     |    |   |    |     |     |     |    |     |   |    |    |   |   |     |    |     |     |   |    |   |    |     |    |    |   |
| C-C-T-A-GT--GT-A-G-CG-GT--G---A-A-A---TG-C-GT-AG--AT-A-TT--A-G--G-A-G-G-A-AC-A-CC---AG--T--G--GC-GAA-G--G-C-G-----G--C-C-T-G---CTG--G--AC-T-G-----T-T---A-C-T--GA--CA-C-T-G--A-GG--C-A-CG-A--AA-G-C---G-TG--GG-            |    |     |     |    |   |    |     |     |     |    |     |   |    |    |   |   |     |    |     |     |   |    |   |    |     |    |    |   |
| G--AG-C-A-AA-----CA--GG                                                                                                                                                                                                    |    |     |     |    |   |    |     |     |     |    |     |   |    |    |   |   |     |    |     |     |   |    |   |    |     |    |    |   |
| Bacteria(100);Firmicutes(100);Clostridia(100);Clostridiales(100);Lachnospiraceae(100);Incertae_Sedis(89);unclassified(89);unclassified(89);unclassified(89);                                                               |    |     |     |    |   |    |     |     |     |    |     |   |    |    |   |   |     |    |     |     |   |    |   |    |     |    |    |   |
| Otu0237                                                                                                                                                                                                                    | 0  | 0   | 0   | 0  | 0 | 0  | 0   | 0   | 0   | 0  | 0   | 0 | 0  | 0  | 0 | 0 | 0   | 0  | 0   | 0   | 0 | 0  | 0 | 0  | 0   | 0  | 0  |   |
|                                                                                                                                                                                                                            | 0  | 0   | 0   | 0  | 0 | 37 | 0   | 90  | 0   | 0  | 95  | 0 | 0  | 0  | 0 | 0 | 0   | 0  | 0   | 0   | 0 | 0  | 0 | 0  | 0   | 0  | 0  |   |
|                                                                                                                                                                                                                            | 0  | 0   | 0   | 0  | 0 | 0  | 0   | 0   | 0   | 0  | 0   | 0 | 0  | 0  | 0 | 0 | 0   | 0  | 0   | 0   | 0 | 0  | 0 | 0  | 0   | 0  | 0  |   |
|                                                                                                                                                                                                                            | 0  | 0   | 0   | 0  | 0 | 0  | 0   | 0   | 0   | 0  | 0   | 0 | 0  | 0  | 0 | 0 | 0   | 0  | 0   | 0   | 0 | 0  | 0 | 0  | 0   | 0  | 0  |   |
| M02255_77_000000000-ADUT3_1_1104_14897_20585                                                                                                                                                                               |    |     |     |    |   |    |     |     |     |    |     |   |    |    |   |   |     |    |     |     |   |    |   |    |     |    |    |   |
| T---AC---GA-AG-GGG-----GCA-A-G-----C-G-T---T-GT-T-CGG-AA-----TT-A-C-T--GG-GC-----GT-A---AA-GG-GC-GC-----G-TA-G-G-C-G-----G--C-TT-A-T-C-----                                                                                |    |     |     |    |   |    |     |     |     |    |     |   |    |    |   |   |     |    |     |     |   |    |   |    |     |    |    |   |
| -----AA---G-T-C-A-----G-G-C--G--TG--A-AA-TT--C-C-CG-G-G-----CT-C-AA-----C-C-T-G-G-G-G--G-C---T-G--C-G---C-T-----T-GA-T-A--C-----T-G-A-TG--A-G-C---T-T-G-A-A-T-G---C-GG---GA-G-A-----G-G-A-T--AG-T-----GG--A--ATT---        |    |     |     |    |   |    |     |     |     |    |     |   |    |    |   |   |     |    |     |     |   |    |   |    |     |    |    |   |
| C-C-C-A-GT--GT-A-G-AG-GT--G---A-A-A---TT-C-GT-AG--AT-A-TT--G-G--G-A-A-G-A-AC-A-CC---AG--T--G--GC-GAA-G--G-C-G-----G--C-T-A-T---CTG--G--CC-C-G-----T-A--A-T-T--GA--CG-C-T-G--A-GG--C-G-CG-A--AA-G-C---G-TG--GG-             |    |     |     |    |   |    |     |     |     |    |     |   |    |    |   |   |     |    |     |     |   |    |   |    |     |    |    |   |
| G--AG-C-A-AA-----CA--GG                                                                                                                                                                                                    |    |     |     |    |   |    |     |     |     |    |     |   |    |    |   |   |     |    |     |     |   |    |   |    |     |    |    |   |
| Bacteria(100);Proteobacteria(100);Alphaproteobacteria(100);Rhodospirillales(100);unclassified(100);unclassified(100);unclassified(100);unclassified(100);unclassified(100);                                                |    |     |     |    |   |    |     |     |     |    |     |   |    |    |   |   |     |    |     |     |   |    |   |    |     |    |    |   |
| Otu0238                                                                                                                                                                                                                    | 0  | 0   | 0   | 0  | 0 | 0  | 0   | 0   | 0   | 0  | 0   | 0 | 0  | 0  | 0 | 0 | 0   | 0  | 0   | 0   | 0 | 0  | 0 | 0  | 0   | 0  | 0  |   |
|                                                                                                                                                                                                                            | 0  | 0   | 0   | 0  | 0 | 0  | 0   | 0   | 0   | 0  | 0   | 0 | 0  | 41 | 0 | 0 | 0   | 0  | 0   | 0   | 0 | 0  | 0 | 0  | 0   | 0  | 0  |   |
|                                                                                                                                                                                                                            | 0  | 0   | 0   | 0  | 0 | 0  | 0   | 0   | 0   | 0  | 0   | 0 | 0  | 0  | 0 | 0 | 0   | 0  | 0   | 0   | 0 | 5  | 0 | 0  | 0   | 0  | 0  |   |
|                                                                                                                                                                                                                            | 13 | 0   | 0   | 0  | 0 | 0  | 0   | 0   | 0   | 0  | 0   | 0 | 0  | 0  | 0 | 0 | 0   | 0  | 0   | 101 | 0 | 0  | 0 | 0  | 0   | 0  | 0  |   |
| M02255_77_000000000-ADUT3_1_1101_13777_20000                                                                                                                                                                               |    |     |     |    |   |    |     |     |     |    |     |   |    |    |   |   |     |    |     |     |   |    |   |    |     |    |    |   |
| T---AC---GT-AT-GGT-----GCA-A-G-----C-G-T---T-AT-C-CGG-AT-----TT-A-C-T--GG-GT-----GT-A---AA-GG-GA-GC-----G-TA-G-A-C-G-----G--T-TG-T-G-T-----                                                                                |    |     |     |    |   |    |     |     |     |    |     |   |    |    |   |   |     |    |     |     |   |    |   |    |     |    |    |   |
| -----AA---G-T-C-T-----G-A-T--G--TG--A-AA-AC--C-C-GG-G-G-----CT-C-AA-----C-C-C-C-G-G-G--A-C---T-G--C-A--T-T-----G--GA-A-A--C-----T-A-T--GC--A-G-C---T-A-G-A-G-T-G---T-CG---GA-G-A-----G-G-T-A--AG-C-----GG--A--ATT---C-     |    |     |     |    |   |    |     |     |     |    |     |   |    |    |   |   |     |    |     |     |   |    |   |    |     |    |    |   |
| C-T-A-GT--GT-A-G-CG-GT--G---A-A-A---TG-C-GT-AG--AT-A-TT--A-G--G-A-G-G-A-AC-A-CC---AG--T--G--GC-GAA-G--G-C-G-----G--C-T-T-A---CTG--G--AC-G-A-----T-A--A-C-T--GA--CG-T-T-G--A-GG--C-T-CG-A--AA-G-C---G-TG--GG-G-             |    |     |     |    |   |    |     |     |     |    |     |   |    |    |   |   |     |    |     |     |   |    |   |    |     |    |    |   |
| -AG-C-A-AA-----CA--GG                                                                                                                                                                                                      |    |     |     |    |   |    |     |     |     |    |     |   |    |    |   |   |     |    |     |     |   |    |   |    |     |    |    |   |
| Bacteria(100);Firmicutes(100);Clostridia(100);Clostridiales(100);Lachnospiraceae(100);Incertae_Sedis(89);unclassified(89);unclassified(89);unclassified(89);                                                               |    |     |     |    |   |    |     |     |     |    |     |   |    |    |   |   |     |    |     |     |   |    |   |    |     |    |    |   |
| Otu0239                                                                                                                                                                                                                    | 7  | 1   | 0   | 0  | 0 | 0  | 0   | 0   | 0   | 0  | 0   | 0 | 0  | 4  | 0 | 0 | 0   | 0  | 0   | 0   | 4 | 0  | 0 | 0  | 0   | 1  | 0  | 0 |
|                                                                                                                                                                                                                            | 0  | 0   | 0   | 49 | 0 | 0  | 0   | 0   | 0   | 1  | 5   | 0 | 13 | 0  | 5 | 0 | 0   | 0  | 196 | 0   | 0 | 0  | 4 | 1  | 0   | 0  | 0  |   |
|                                                                                                                                                                                                                            | 0  | 0   | 2   | 0  | 5 | 0  | 4   | 3   | 0   | 0  | 0   | 0 | 0  | 0  | 0 | 0 | 0   | 24 | 0   | 0   | 1 | 23 | 0 | 0  | 65  | 0  | 18 |   |
|                                                                                                                                                                                                                            | 0  | 9   | 18  | 0  | 0 | 0  | 0   | 0   | 0   | 0  | 0   | 0 | 0  | 0  | 0 | 0 | 0   | 0  | 0   | 0   | 0 | 0  | 0 | 0  | 0   | 0  | 0  |   |
| M02255_76_000000000-ADUNE_1_1109_29208_15845                                                                                                                                                                               |    |     |     |    |   |    |     |     |     |    |     |   |    |    |   |   |     |    |     |     |   |    |   |    |     |    |    |   |
| C---GG---CT-AA-CTC-----CGT-G-C-----C--A--G---C--AG-C-CGC-GG-----TA-A--T-A--CG-GA-----GG--G---TG-CA-AG-CG-----T-TA-T-C-C-G-----G--A-CT-T-A-T-----                                                                           |    |     |     |    |   |    |     |     |     |    |     |   |    |    |   |   |     |    |     |     |   |    |   |    |     |    |    |   |
| -----TA---G-T-C-A-----G-T-G--G--TG--A-AA-GC--C-T-GT-C-G-----CT-T-AA-----C-G-A-T-A-G-A--A-C---T-G--C-C---A-T-----T-GA-T-A--C-----T-G-T--AA--G-T-C---T-T-G-A-G-T-A--T-AT---TT-G-A-----G-G-T-A--GC-T-----GG--A--ATA---A-G-    |    |     |     |    |   |    |     |     |     |    |     |   |    |    |   |   |     |    |     |     |   |    |   |    |     |    |    |   |
| T-A-GT--GT-A-G-CG-GT--G---A-A-A---TG-C-AT-AG--AT-A-TT--A-C--T-T-A-G-A-AC-A-CC---AA--T-T--GC-GAA-G--G-C-A-----G--G-T-T-A---CCA--A-GA-T-A-----T-A--A-C-T--GA--CG-C-T-G--A-GG--G-A-CG-A--AA-G-C---G-TG--GG-G--                |    |     |     |    |   |    |     |     |     |    |     |   |    |    |   |   |     |    |     |     |   |    |   |    |     |    |    |   |
| AG-C-G-AA-----CA--GG                                                                                                                                                                                                       |    |     |     |    |   |    |     |     |     |    |     |   |    |    |   |   |     |    |     |     |   |    |   |    |     |    |    |   |
| Bacteria(100);Bacteroidetes(100);Flavobacteria(100);Flavobacteriales(100);Flavobacteriaceae(100);Cloacibacterium(100);unclassified(100);unclassified(100);unclassified(100);                                               |    |     |     |    |   |    |     |     |     |    |     |   |    |    |   |   |     |    |     |     |   |    |   |    |     |    |    |   |



|                                                                                                                                                                                                                                                                                                                                                                                                                                                                                                                                                                                                                                                                                                                                                                                                             |    |     |    |    |     |    |    |   |    |    |    |     |    |    |     |     |   |   |    |     |    |   |    |     |    |     |   |   |
|-------------------------------------------------------------------------------------------------------------------------------------------------------------------------------------------------------------------------------------------------------------------------------------------------------------------------------------------------------------------------------------------------------------------------------------------------------------------------------------------------------------------------------------------------------------------------------------------------------------------------------------------------------------------------------------------------------------------------------------------------------------------------------------------------------------|----|-----|----|----|-----|----|----|---|----|----|----|-----|----|----|-----|-----|---|---|----|-----|----|---|----|-----|----|-----|---|---|
| Otu0240                                                                                                                                                                                                                                                                                                                                                                                                                                                                                                                                                                                                                                                                                                                                                                                                     | 0  | 0   | 80 | 0  | 0   | 0  | 51 | 0 | 0  | 0  | 0  | 0   | 0  | 0  | 0   | 0   | 0 | 0 | 0  | 1   | 5  | 0 | 0  | 4   | 0  | 0   | 0 | 0 |
|                                                                                                                                                                                                                                                                                                                                                                                                                                                                                                                                                                                                                                                                                                                                                                                                             | 0  | 0   | 0  | 0  | 0   | 0  | 0  | 0 | 26 | 0  | 26 | 102 | 0  | 25 | 0   | 22  | 0 | 0 | 0  | 0   | 15 | 0 | 0  | 0   | 0  | 0   | 0 | 0 |
|                                                                                                                                                                                                                                                                                                                                                                                                                                                                                                                                                                                                                                                                                                                                                                                                             | 0  | 0   | 0  | 0  | 0   | 0  | 0  | 0 | 0  | 0  | 6  | 0   | 0  | 0  | 0   | 0   | 0 | 0 | 0  | 0   | 0  | 0 | 0  | 0   | 0  | 0   | 0 |   |
|                                                                                                                                                                                                                                                                                                                                                                                                                                                                                                                                                                                                                                                                                                                                                                                                             | 16 | 0   | 0  | 0  | 0   | 0  | 4  | 0 | 0  | 34 | 0  | 0   | 0  | 14 | 0   | 0   | 0 | 0 | 0  | 0   | 0  | 0 | 0  | 0   | 0  | 0   | 0 |   |
| M02255_77_000000000-ADUT3_1_1116_21872_12643 T---AC---GG-GG-GGT-----GCA-A-G-----C-G-T--T-AC-T-CGG-AA-----TC-A-C-T-GG-GC-----GT-A---AA-GG-AC-GC-----G-TA-G-G-C-G-----G-A-TT-A-T-C-----AA---G-T-C-T-----T-T-T-G--TG--A-AA-TC--T-A-GT-G-G----CT-T-AA-----C-C-A-C-T-A-A-A-C---T-G-C-T--T-A-----G-GA-A-A--C-----T-G-A-TA-G-T-C---T-A-G-A-G-T-A--G-GG----GA-G-A-----G-G-T-A--GA-T----GG-A-ATT---C-T-T-G-GT--GT-A-G-GG-GT--A--A-A-A---TC-C-GT-AG--AG-A-TC--A-A-G-A-A-G-A-AT-A-CC--CA--T-T-GC-GAA-A-G-C-G-----A-T-C-T-G---CTG--G-AA-C-C-----T-A--A-C-T-GA--CG-C-T-G--A-GG--C-G-TG-A-AA-G-C---G-TG--GG-T--AG-C-A-AA-----CA--GG Bacteria(100);Proteobacteria(100);Epsilonproteobacteria(100);Campylobacterales(100);Campylobacteraceae(100);Campylobacter(100);unclassified(100);unclassified(100);unclassified(100); |    |     |    |    |     |    |    |   |    |    |    |     |    |    |     |     |   |   |    |     |    |   |    |     |    |     |   |   |
| Otu0241                                                                                                                                                                                                                                                                                                                                                                                                                                                                                                                                                                                                                                                                                                                                                                                                     | 0  | 0   | 0  | 37 | 0   | 0  | 46 | 0 | 21 | 0  | 0  | 5   | 0  | 0  | 0   | 0   | 0 | 0 | 0  | 0   | 0  | 0 | 0  | 0   | 0  | 0   | 0 |   |
|                                                                                                                                                                                                                                                                                                                                                                                                                                                                                                                                                                                                                                                                                                                                                                                                             | 0  | 111 | 0  | 0  | 0   | 32 | 44 | 0 | 12 | 0  | 0  | 52  | 28 | 0  | 140 | 125 | 0 | 0 | 0  | 0   | 0  | 6 | 0  | 0   | 6  | 0   | 0 |   |
|                                                                                                                                                                                                                                                                                                                                                                                                                                                                                                                                                                                                                                                                                                                                                                                                             | 0  | 0   | 0  | 0  | 0   | 0  | 0  | 0 | 0  | 0  | 0  | 0   | 0  | 0  | 5   | 0   | 0 | 0 | 0  | 0   | 0  | 0 | 0  | 100 | 0  | 0   | 0 |   |
|                                                                                                                                                                                                                                                                                                                                                                                                                                                                                                                                                                                                                                                                                                                                                                                                             | 0  | 0   | 0  | 10 | 122 | 0  | 0  | 0 | 0  | 0  | 0  | 0   | 0  | 0  | 0   | 0   | 2 | 0 | 56 | 121 | 42 | 0 | 0  | 13  | 0  | 144 |   |   |
| M02255_77_000000000-ADUT3_1_1103_8004_13852 T---AC---GT-AG-GGT-----GCA-A-G-----C-A-T--T-AT-C-CGG-AG-----TG-A-C-T-GG-GC-----GT-A---AA-GA-GTTGC-----G-TA-G-G-C-G-----G--T-TT-A-A-T-----AA---G-T-G-A-----A-T-A-G--TG--A-AA-CC--T-G-GT-G-G----CT-C-AA-----C-C-A-TAC-A-G-A-C---T-A-T-T--A-T-----T-CA-A-A--C-----T-G-T-TA-A-A-C---T-C-G-A-G-A-G--T-GG----TA-G-A-----G-G-T-A--AC-T-----GG-A-ATT---T-C-T-A-GT--GT-A-G-GA-GT--G--A-A-A---TC-C-GT-AG--AT-A-TT-A-G--A-A-G-G-A-AC-A-CC--AA--T-G-GC-GTA-G-G-C-A-----G-G-T-T-A--CTG--G-AC-C-A-----T-T--T-C-T-GA--CG-C-T-A-A-GG--C-A-CG-A-AA-G-C---G-TG--GG-G-AG-C-G-AA-----CT--GG Bacteria(100);Candidate_division_TM7(100);unclassified(100);unclassified(100);unclassified(100);unclassified(100);unclassified(100);unclassified(100);unclassified(100);                |    |     |    |    |     |    |    |   |    |    |    |     |    |    |     |     |   |   |    |     |    |   |    |     |    |     |   |   |
| Otu0242                                                                                                                                                                                                                                                                                                                                                                                                                                                                                                                                                                                                                                                                                                                                                                                                     | 0  | 0   | 0  | 4  | 0   | 11 | 0  | 0 | 0  | 9  | 12 | 0   | 0  | 0  | 0   | 0   | 0 | 0 | 0  | 3   | 0  | 0 | 25 | 0   | 36 | 35  | 0 | 4 |
|                                                                                                                                                                                                                                                                                                                                                                                                                                                                                                                                                                                                                                                                                                                                                                                                             | 0  | 0   | 0  | 0  | 1   | 0  | 0  | 0 | 6  | 0  | 0  | 1   | 0  | 22 | 0   | 0   | 5 | 5 | 0  | 0   | 5  | 0 | 0  | 1   | 0  | 0   | 0 | 8 |
|                                                                                                                                                                                                                                                                                                                                                                                                                                                                                                                                                                                                                                                                                                                                                                                                             | 0  | 0   | 0  | 0  | 0   | 0  | 0  | 0 | 0  | 0  | 0  | 0   | 0  | 0  | 0   | 0   | 0 | 0 | 0  | 0   | 0  | 6 | 0  | 1   | 0  | 0   | 0 | 0 |
|                                                                                                                                                                                                                                                                                                                                                                                                                                                                                                                                                                                                                                                                                                                                                                                                             | 0  | 0   | 0  | 0  | 0   | 0  | 0  | 0 | 0  | 0  | 0  | 0   | 0  | 0  | 0   | 0   | 0 | 0 | 0  | 3   | 0  | 0 | 0  | 0   | 0  | 0   | 0 |   |
| M02255_76_000000000-ADUNE_1_2101_13394_2931 G---AA---GC-AC-CGG-----CTA-A-C-----T-C--C--G--TG-C-CAG-CA-----GC-C-G-C-GG-TA-----AT-A---CG-GA-GG-GT-----G-CG-A-G-C-T-----G--T-T-A-A-T-----C---G-G-A-A-----G-A-T-G--TG--A-AA-GC--C-C-GG-G-G----CT-C-AA-----C-C-T-C-G-G-A-A-C---A-G--C-A--T-T-----T-TG-A-A--C-----T-G-G-CA-G-A-C---T-A-G-A-G-T-C---T-TG---TA-G-A-----G-G-G-G--GG-T-----AG--A-ATT---T-C-A-G-GT--GT-A-G-CG-GT--G--A-A-A---TG-C-GT-AG--AG-A-TC-T-G--A-A-G-G-A-AT-A-CC--GG--T-G-GC-GAA-G-G-C-G-----G-C-C-C-C--CTG--G-AC-A-A-----A-G--A-C-T-GA--CG-C-T-C--A-GA--T-G-CG-A-AA-G-C---G-TG--GG-G-AG-C-A-AA-----CA--GG Bacteria(100);Proteobacteria(100);Gammaproteobacteria(100);Vibrionales(100);Vibrionaceae(100);unclassified(100);unclassified(100);unclassified(100);unclassified(100);               |    |     |    |    |     |    |    |   |    |    |    |     |    |    |     |     |   |   |    |     |    |   |    |     |    |     |   |   |
| Otu0243                                                                                                                                                                                                                                                                                                                                                                                                                                                                                                                                                                                                                                                                                                                                                                                                     | 0  | 0   | 0  | 0  | 0   | 0  | 0  | 0 | 0  | 0  | 0  | 3   | 0  | 0  | 0   | 1   | 0 | 3 | 4  | 0   | 0  | 0 | 0  | 0   | 0  | 0   | 0 | 0 |
|                                                                                                                                                                                                                                                                                                                                                                                                                                                                                                                                                                                                                                                                                                                                                                                                             | 0  | 0   | 0  | 0  | 0   | 0  | 0  | 0 | 0  | 0  | 0  | 0   | 0  | 0  | 0   | 0   | 0 | 0 | 0  | 0   | 0  | 0 | 0  | 0   | 0  | 1   | 0 | 0 |
|                                                                                                                                                                                                                                                                                                                                                                                                                                                                                                                                                                                                                                                                                                                                                                                                             | 0  | 1   | 0  | 0  | 0   | 0  | 12 | 0 | 0  | 0  | 0  | 0   | 0  | 0  | 0   | 0   | 0 | 0 | 0  | 0   | 0  | 0 | 0  | 0   | 0  | 0   | 0 | 0 |
|                                                                                                                                                                                                                                                                                                                                                                                                                                                                                                                                                                                                                                                                                                                                                                                                             | 0  | 0   | 0  | 0  | 0   | 0  | 0  | 0 | 0  | 0  | 0  | 0   | 0  | 1  | 0   | 0   | 0 | 0 | 0  | 0   | 0  | 0 | 0  | 0   | 0  | 0   | 0 |   |
| M02255_77_000000000-ADUT3_1_2112_6049_4268 G---TG---CC-AG-CAG-----                                                                                                                                                                                                                                                                                                                                                                                                                                                                                                                                                                                                                                                                                                                                          |    |     |    |    |     |    |    |   |    |    |    |     |    |    |     |     |   |   |    |     |    |   |    |     |    |     |   |   |



[illegible]



|                                                                                                                                                                                                                           |    |    |    |    |    |    |    |     |   |   |    |    |    |     |    |    |   |    |    |     |   |    |    |     |    |     |   |
|---------------------------------------------------------------------------------------------------------------------------------------------------------------------------------------------------------------------------|----|----|----|----|----|----|----|-----|---|---|----|----|----|-----|----|----|---|----|----|-----|---|----|----|-----|----|-----|---|
| Otu0250                                                                                                                                                                                                                   | 0  | 0  | 30 | 0  | 0  | 0  | 38 | 0   | 0 | 0 | 0  | 0  | 0  | 0   | 0  | 0  | 0 | 0  | 0  | 0   | 0 | 0  | 0  | 0   | 0  | 0   | 0 |
|                                                                                                                                                                                                                           | 0  | 0  | 0  | 0  | 0  | 0  | 0  | 0   | 0 | 0 | 44 | 0  | 0  | 0   | 0  | 0  | 0 | 0  | 0  | 4   | 0 | 0  | 19 | 0   | 0  | 0   | 0 |
|                                                                                                                                                                                                                           | 0  | 0  | 0  | 0  | 0  | 0  | 0  | 0   | 0 | 0 | 0  | 0  | 0  | 10  | 0  | 15 | 0 | 0  | 0  | 0   | 0 | 0  | 0  | 0   | 0  | 0   | 0 |
|                                                                                                                                                                                                                           | 0  | 56 | 0  | 0  | 0  | 0  | 0  | 0   | 0 | 0 | 0  | 0  | 0  | 0   | 0  | 0  | 0 | 0  | 0  | 0   | 0 | 14 | 20 | 0   | 0  |     |   |
| M02255_77_000000000-ADUT3_1_1119_9660_6144 T---AC---GT-AG-GGG-----GCA-A-G-----C--G--T---T--AT-C-CGG-AT-----TT-A--C-T-GG-GT-----GT--A-----AA-GG-GA-GC-----G-TA-G-G-C-G-----G--C-GG-A-G-C-----                              |    |    |    |    |    |    |    |     |   |   |    |    |    |     |    |    |   |    |    |     |   |    |    |     |    |     |   |
| AA---G-T-C-A-----G-A-A-G--TG--A-AA-GC--C-C-GG-G-G----CT-C-AA-----C-C-C-C-G-G-G-A-C---G-G--C-T---T-T-----T--GA-A-A--C-----T-G-C--CC--T-G-C---T-T-G-A-T-T--T---C-AG-----GA-G-A-----G-G-T-A--AG-C-----GG--A--ATT---C-C-T-    |    |    |    |    |    |    |    |     |   |   |    |    |    |     |    |    |   |    |    |     |   |    |    |     |    |     |   |
| A-GT--GT-A-G-CG-GT--G---A--A-A--TG-C-GT-AG--AT-A-TT--A-G--G-A-G-G-A-AC-A-CC--AG--T--G--GC-GAA-G--G-C--G-----G--C-T-T-A--CTG--G--AC-T-G-----A-C---A-A-T--GA--CG-C-T-G--A-GG--C-T-CG-A--AA-G-C--G-TG--GG-G--                |    |    |    |    |    |    |    |     |   |   |    |    |    |     |    |    |   |    |    |     |   |    |    |     |    |     |   |
| AG-C-A-AA-----CA--GG Bacteria(100);Firmicutes(100);Clostridia(100);Clostridiales(100);Lachnospiraceae(100);Coprococcus(100);unclassified(100);unclassified(100);unclassified(100);                                        |    |    |    |    |    |    |    |     |   |   |    |    |    |     |    |    |   |    |    |     |   |    |    |     |    |     |   |
| Otu0251                                                                                                                                                                                                                   | 0  | 0  | 0  | 0  | 0  | 0  | 0  | 0   | 0 | 0 | 0  | 13 | 0  | 1   | 1  | 1  | 0 | 4  | 11 | 5   | 0 | 5  | 0  | 0   | 0  | 0   | 0 |
|                                                                                                                                                                                                                           | 7  | 0  | 0  | 0  | 0  | 0  | 0  | 0   | 0 | 0 | 0  | 0  | 0  | 0   | 0  | 1  | 0 | 0  | 0  | 0   | 0 | 0  | 0  | 0   | 0  | 0   | 0 |
|                                                                                                                                                                                                                           | 0  | 0  | 4  | 0  | 0  | 1  | 1  | 0   | 2 | 3 | 18 | 0  | 4  | 0   | 0  | 0  | 1 | 0  | 0  | 0   | 0 | 0  | 0  | 0   | 0  | 0   | 0 |
|                                                                                                                                                                                                                           | 0  | 11 | 2  | 0  | 0  | 5  | 0  | 4   | 0 | 0 | 0  | 1  | 0  | 0   | 0  | 0  | 0 | 0  | 0  | 0   | 0 | 0  | 1  | 0   | 1  | 0   |   |
| M02255_77_000000000-ADUT3_1_1116_8081_8931 T---AC---AG-AG-GGT-----GCA-A-G-----C--G--T---T--AA-T-CGG-AT-----TT-A--C-T-GG-GC-----GT--A-----AA-GC-GT-GC-----G-TA-G-G-T-G-----G--C-CA-A-T-T-----AA-                           |    |    |    |    |    |    |    |     |   |   |    |    |    |     |    |    |   |    |    |     |   |    |    |     |    |     |   |
| ---G-T-C-A-----A-A-T-G--TG--A-AA-TC--C-C-CG-A-G-----CT-T-AA-----C-T-T-G-G-G-A--A-T---T-G--C-A---T-T-----C-GA-T-A--C-----T-G-G--TT-G-G-C---T-A-G-A-G-T-A--T-GG-----GA-G-A-----G-G-A-T--GG-T-----AG--A--ATT---C-C-A-G-      |    |    |    |    |    |    |    |     |   |   |    |    |    |     |    |    |   |    |    |     |   |    |    |     |    |     |   |
| GT--GT-A-G-CG-GT--G---A--A-A--TG-C-GT-AG--AG-A-TC--T-G--G-A-G-G-A-AT-A-CC--GA-T--G--GC-GAA-G--G-C--A-----G--C-C-A-T--CTG--G--CC-T-A-----A-T---A-C-T--GA--CA-C-T-G--A-GG--T-A-CG-A--AA-G-C--A-TG--GG-G--AG-C-              |    |    |    |    |    |    |    |     |   |   |    |    |    |     |    |    |   |    |    |     |   |    |    |     |    |     |   |
| A-AA-----CA--GG Bacteria(100);Proteobacteria(100);Gammaproteobacteria(100);Pseudomonadales(100);Moraxellaceae(100);Acinetobacter(100);unclassified(100);unclassified(100);unclassified(100);                              |    |    |    |    |    |    |    |     |   |   |    |    |    |     |    |    |   |    |    |     |   |    |    |     |    |     |   |
| Otu0252                                                                                                                                                                                                                   | 0  | 0  | 0  | 0  | 0  | 0  | 0  | 0   | 0 | 0 | 0  | 0  | 0  | 0   | 0  | 0  | 0 | 0  | 0  | 0   | 0 | 0  | 0  | 0   | 0  | 0   | 0 |
|                                                                                                                                                                                                                           | 0  | 0  | 0  | 0  | 0  | 0  | 0  | 0   | 0 | 0 | 0  | 0  | 24 | 0   | 0  | 0  | 0 | 0  | 34 | 0   | 0 | 0  | 0  | 0   | 0  | 0   | 0 |
|                                                                                                                                                                                                                           | 0  | 0  | 0  | 0  | 0  | 8  | 0  | 0   | 0 | 0 | 0  | 0  | 0  | 0   | 0  | 0  | 0 | 0  | 0  | 0   | 0 | 0  | 0  | 0   | 0  | 0   | 0 |
|                                                                                                                                                                                                                           | 0  | 0  | 0  | 0  | 0  | 0  | 2  | 0   | 0 | 0 | 0  | 1  | 0  | 0   | 0  | 0  | 0 | 0  | 0  | 0   | 0 | 0  | 0  | 20  | 0  | 0   |   |
| M02255_77_000000000-ADUT3_1_1106_12439_14042 T---AC---GT-AG-GGC-----GCG-A-G-----C--G--T---T--GT-C-CGG-AA-----TT-A--T-T-GG-GC-----GT--A-----AA-GA-GC-TT-----G-TA-G-G-C-G-----G--T-TT-G-T-C-----                            |    |    |    |    |    |    |    |     |   |   |    |    |    |     |    |    |   |    |    |     |   |    |    |     |    |     |   |
| ----GC---G-T-C-T-----G-C-T--G--TG--A-AA-GC--C-C-GG-G-G----CT-T-AA-----C-C-C-C-G-G-G--T-T---T-G--C-A--G-T-----G--GG-T-A--C-----G--G-G--CA-G-A-C---T-A-G-A-G-T--G--C-AG-----TA-G-G-----G-G-A-G--AC-T-----GG--A--ATT---      |    |    |    |    |    |    |    |     |   |   |    |    |    |     |    |    |   |    |    |     |   |    |    |     |    |     |   |
| C-C-T-G-GT--GT-A-G-CG-GT--G---A--A-A--TG-C-GC-AG--AT-A-TC--A-G--G-A-G-G-A-AC-A-CC---AA--T--G--GC-GAA-G--G-C--A-----G--G-T-C-T--CTG--G--GC-T-G-----T-A---A-C-T--GA--CG-C-T-G--A-GA--A-G-CG-A--AA-G-C---A-TG--              |    |    |    |    |    |    |    |     |   |   |    |    |    |     |    |    |   |    |    |     |   |    |    |     |    |     |   |
| GG-G--AG-C-A-AA-----CA--GG Bacteria(100);Actinobacteria(100);Actinobacteria(100);Actinobacteridae(100);Actinomycetales(100);Micrococcineae(100);Micrococcaceae(100);unclassified(53);unclassified(53);                    |    |    |    |    |    |    |    |     |   |   |    |    |    |     |    |    |   |    |    |     |   |    |    |     |    |     |   |
| Otu0253                                                                                                                                                                                                                   | 0  | 0  | 0  | 0  | 0  | 0  | 0  | 0   | 0 | 0 | 0  | 0  | 0  | 0   | 0  | 0  | 0 | 0  | 0  | 0   | 0 | 0  | 0  | 0   | 0  | 0   | 6 |
|                                                                                                                                                                                                                           | 0  | 0  | 0  | 0  | 0  | 0  | 48 | 122 | 0 | 0 | 0  | 0  | 0  | 115 | 47 | 0  | 0 | 0  | 0  | 0   | 0 | 0  | 4  | 3   | 0  | 0   | 0 |
|                                                                                                                                                                                                                           | 0  | 0  | 0  | 0  | 0  | 0  | 0  | 0   | 0 | 0 | 0  | 3  | 0  | 0   | 0  | 0  | 0 | 0  | 0  | 0   | 0 | 0  | 0  | 0   | 0  | 0   | 0 |
|                                                                                                                                                                                                                           | 29 | 0  | 0  | 0  | 0  | 0  | 0  | 0   | 0 | 0 | 0  | 0  | 0  | 0   | 0  | 0  | 0 | 0  | 46 | 0   | 0 | 0  | 0  | 0   | 45 |     |   |
| M02255_77_000000000-ADUT3_1_1109_4042_13523 T---AC---GA-AG-GGG-----GCT-A-G-----C--G--T---T--GT-T-CGG-AA-----TT-A--C-T-GG-GC-----GT--A-----AA-GC-GC-AC-----G-TA-G-G-C-G-----G--A-CA-T-T-T-----AA-                          |    |    |    |    |    |    |    |     |   |   |    |    |    |     |    |    |   |    |    |     |   |    |    |     |    |     |   |
| ---G-T-C-A-----G-G-G--G--TG--A-AA-TC--C-C-GG-G-G----CT-C-AA-----C-C-C-C-G-G-A--A-C---G-G--C-C---T-T-----T--GA-T-A--C-----T--G-G--GT-G-T-C---T-T-G-A-G-T-T---C-GG-----AA-G-A-----G-G-T-G--AG-T-----GG--A--ATT---G-C-G-A-   |    |    |    |    |    |    |    |     |   |   |    |    |    |     |    |    |   |    |    |     |   |    |    |     |    |     |   |
| GT--GT-A-G-AG-GT--G---A--A-A--TT-C-GT-AG--AT-A-TT--C-G--C-A-G-G-A-AC-A-CC---AG--T--G--GC-GAA-G--G-C--G-----G--C-T-C-A--CTG--G--TC-C-G-----A-T---A-C-T--GA--CG-C-T-G--A-GG--T-G-CG-A--AA-G-C--G-TG--GG-G--AG-C-            |    |    |    |    |    |    |    |     |   |   |    |    |    |     |    |    |   |    |    |     |   |    |    |     |    |     |   |
| A-AA-----CA--GG Bacteria(100);Proteobacteria(100);Alphaproteobacteria(100);Rhizobiales(100);unclassified(100);unclassified(100);unclassified(100);unclassified(100);unclassified(100);                                    |    |    |    |    |    |    |    |     |   |   |    |    |    |     |    |    |   |    |    |     |   |    |    |     |    |     |   |
| Otu0254                                                                                                                                                                                                                   | 0  | 0  | 0  | 21 | 0  | 0  | 50 | 15  | 0 | 0 | 0  | 0  | 0  | 0   | 0  | 0  | 0 | 0  | 0  | 0   | 0 | 0  | 1  | 0   | 0  | 0   | 0 |
|                                                                                                                                                                                                                           | 0  | 0  | 42 | 0  | 0  | 41 | 41 | 0   | 0 | 0 | 0  | 0  | 0  | 74  | 0  | 0  | 0 | 0  | 7  | 0   | 0 | 0  | 0  | 0   | 1  | 0   | 0 |
|                                                                                                                                                                                                                           | 0  | 0  | 0  | 0  | 0  | 0  | 0  | 16  | 0 | 0 | 0  | 0  | 0  | 38  | 6  | 0  | 0 | 41 | 0  | 0   | 0 | 0  | 0  | 101 | 0  | 0   | 0 |
|                                                                                                                                                                                                                           | 57 | 0  | 0  | 0  | 50 | 0  | 3  | 0   | 0 | 1 | 0  | 0  | 33 | 0   | 0  | 0  | 0 | 0  | 0  | 283 | 0 | 0  | 0  | 34  | 0  | 823 |   |
| M02255_77_000000000-ADUT3_1_1112_23321_11471 T---AC---GG-AG-GGT-----GCA-A-G-----C--G--T---T--AC-T-CGG-AA-----TC-A--C-T-GG-GC-----GT--A-----AA-GG-AC-GC-----G-TA-G-G-C-G-----G--A-TT-A-T-C-----                            |    |    |    |    |    |    |    |     |   |   |    |    |    |     |    |    |   |    |    |     |   |    |    |     |    |     |   |
| -----AA---G-T-C-T-----C-T-T--G--TG--A-AA-TC--C-T-AT-G-G----CT-T-AA-----C-C-A-T-A-G-A--A-C---T-G--C-T---T-G-----G--GA-A-A--C-----T--G-A--TA--A-T-C---T-A-G-A-G-T--G--A-GG-----GA-G-A-----G-G-C-A--GA-T-----GG--A--ATT---G- |    |    |    |    |    |    |    |     |   |   |    |    |    |     |    |    |   |    |    |     |   |    |    |     |    |     |   |
| G-T-G-GT--GT-A-G-GG-GT--A---A--A-A--TC-C-GT-AG--AG-A-TC--A-C--C-A-G-G-A-AT-A-CC---CA--T--T--GC-GAA-G--G-C--G-----A--T-C-T-G--CTG--G--AA-C-T-----C-A---A-C-T--GA--CG-C-T-A--A-TG--C-G-TG-A--AA-G-C--G-TG--GG-G--           |    |    |    |    |    |    |    |     |   |   |    |    |    |     |    |    |   |    |    |     |   |    |    |     |    |     |   |
| AG-C-A-AA-----CA--GG Bacteria(100);Proteobacteria(100);Epsilonproteobacteria(100);Campylobacterales(100);Campylobacteraceae(100);Campylobacter(100);unclassified(100);unclassified(100);unclassified(100);                |    |    |    |    |    |    |    |     |   |   |    |    |    |     |    |    |   |    |    |     |   |    |    |     |    |     |   |



[illegible]



|                                                                                                                                                                                                                                                                                                                                                                                                                                                                                                                                                                                                                                              |     |   |   |    |   |    |   |   |   |   |   |    |    |    |    |    |    |    |   |   |   |   |   |    |   |   |    |   |
|----------------------------------------------------------------------------------------------------------------------------------------------------------------------------------------------------------------------------------------------------------------------------------------------------------------------------------------------------------------------------------------------------------------------------------------------------------------------------------------------------------------------------------------------------------------------------------------------------------------------------------------------|-----|---|---|----|---|----|---|---|---|---|---|----|----|----|----|----|----|----|---|---|---|---|---|----|---|---|----|---|
| Otu0260                                                                                                                                                                                                                                                                                                                                                                                                                                                                                                                                                                                                                                      | 0   | 0 | 0 | 14 | 0 | 0  | 3 | 0 | 0 | 0 | 0 | 0  | 0  | 0  | 0  | 0  | 0  | 0  | 0 | 0 | 1 | 0 | 0 | 1  | 0 | 0 | 0  | 0 |
|                                                                                                                                                                                                                                                                                                                                                                                                                                                                                                                                                                                                                                              | 0   | 0 | 2 | 0  | 0 | 0  | 0 | 0 | 0 | 9 | 0 | 2  | 0  | 79 | 0  | 29 | 0  | 0  | 0 | 0 | 7 | 0 | 0 | 0  | 3 | 0 | 0  | 0 |
|                                                                                                                                                                                                                                                                                                                                                                                                                                                                                                                                                                                                                                              | 34  | 0 | 0 | 0  | 0 | 2  | 0 | 0 | 0 | 3 | 0 | 4  | 13 | 13 | 23 | 0  | 0  | 0  | 0 | 0 | 0 | 1 | 0 | 6  | 0 | 0 | 12 | 0 |
|                                                                                                                                                                                                                                                                                                                                                                                                                                                                                                                                                                                                                                              | 271 | 0 | 0 | 0  | 0 | 21 | 3 | 0 | 0 | 0 | 6 | 76 | 0  | 0  | 0  | 17 | 19 | 13 | 0 | 0 | 0 | 0 | 0 | 10 | 0 | 0 |    |   |
| M02255_76_000000000-ADUNE_1_2115_23954_5823 .....AC---T-AC-GT-----GCC-A-G-----C-A-G---C-CG-C-GGT-AA-----TA-C-G-T--AG-GT-----GG--C-----AA-GC-G--TT-----G---T-C-C-G-----G--A-TT-C-T-T-----AA---G-T-C-T-----G-A-T--G--TG--A-AA-GC--C-T-TC-G-G-----CT-C-AA-----C-C-G-A-A-G-A--A-G---T-G-C-A--T-C-----G--GA-A-A--C-----T-G-G--GA--A-A-C---T-T-G-A-G-T--G---C-AG-----AA-G-A-----G-G-A-C--AG-T-----GG--A--ACT---C-C-A-T-GT--GT-A-G-CG-GT--G---A--A-A---TG-C-GT-AG--AT-A-TA--T-G--G-A-A-G-A-AC-A-CC--AG--T--G--GC-GAA-G--G-C-G-----G--C-T-G-T---CTG--G--TC-T-G-----T-A---A-C-T-GA--CG-C-T-G--A-GG--C-T-CG-A-AA-G-C--A-TG--GG-T--AG-C-A-AA-----CA--GG |     |   |   |    |   |    |   |   |   |   |   |    |    |    |    |    |    |    |   |   |   |   |   |    |   |   |    |   |
| Bacteria(100);Firmicutes(100);Bacilli(100);Lactobacillales(100);Lactobacillaceae(100);unclassified(100);unclassified(100);unclassified(100);unclassified(100);                                                                                                                                                                                                                                                                                                                                                                                                                                                                               |     |   |   |    |   |    |   |   |   |   |   |    |    |    |    |    |    |    |   |   |   |   |   |    |   |   |    |   |

|                                                                                                                                                                                                                                                                                                                                                                                                                                                                                                                                                                                                                                             |     |   |   |   |    |    |   |   |    |   |   |   |   |   |   |   |   |   |   |    |    |   |   |   |   |   |   |   |
|---------------------------------------------------------------------------------------------------------------------------------------------------------------------------------------------------------------------------------------------------------------------------------------------------------------------------------------------------------------------------------------------------------------------------------------------------------------------------------------------------------------------------------------------------------------------------------------------------------------------------------------------|-----|---|---|---|----|----|---|---|----|---|---|---|---|---|---|---|---|---|---|----|----|---|---|---|---|---|---|---|
| Otu0261                                                                                                                                                                                                                                                                                                                                                                                                                                                                                                                                                                                                                                     | 753 | 0 | 0 | 0 | 0  | 0  | 0 | 0 | 0  | 0 | 0 | 0 | 0 | 0 | 0 | 0 | 0 | 1 | 0 | 0  | 0  | 0 | 0 | 0 | 0 | 0 | 0 | 2 |
|                                                                                                                                                                                                                                                                                                                                                                                                                                                                                                                                                                                                                                             | 0   | 0 | 0 | 0 | 0  | 0  | 0 | 0 | 0  | 0 | 0 | 0 | 0 | 0 | 0 | 0 | 0 | 0 | 0 | 0  | 92 | 0 | 0 | 0 | 0 | 0 | 0 | 0 |
|                                                                                                                                                                                                                                                                                                                                                                                                                                                                                                                                                                                                                                             | 0   | 0 | 0 | 0 | 0  | 1  | 0 | 0 | 4  | 5 | 0 | 0 | 0 | 0 | 0 | 0 | 0 | 0 | 0 | 81 | 0  | 1 | 0 | 0 | 0 | 0 | 0 | 0 |
|                                                                                                                                                                                                                                                                                                                                                                                                                                                                                                                                                                                                                                             | 0   | 0 | 0 | 0 | 19 | 21 | 0 | 0 | 20 | 2 | 0 | 6 | 0 | 0 | 0 | 0 | 0 | 0 | 0 | 0  | 0  | 0 | 0 | 0 | 0 | 0 | 0 |   |
| M02255_76_000000000-ADUNE_1_1101_28569_13911 .....AC---T-AC-GT-----GCC-A-G-----C-A-G---C-CG-C-GGT-AA-----TA-C-G-T--AG-GT-----GG--C-----AA-GC-G--TT-----G-TC-C-G--G-----A--T-CT-T-T-T-----AA---G-T-C-T-----G-A-T--G--TG--A-AA-GC--C-T-TC-G-G-----CT-T-AA-----C-C-G-G-A-G-T-A-G---T-G-C-A--T-T-----G--GA-A-A--C-----T-G-G--AA--G-A-C---T-T-G-A-G-T--G---C-AG-----AA-G-A-----G-G-A-G--AG-T-----GG--A--ACT---C-C-A-T-GT--GT-A-G-CG-GT--G---A--A-A---TG-C-GT-AG--AT-A-TA--T-G--G-A-A-G-A-AC-A-CC--AG--T--G--GC-GAA-A-G-C-G-----G--C-T-C-T---CTG--G--TC-T-G-----T-A---A-C-T-GA--CG-C-T-G--A-GG--T-T-CG-A-AA-G-C--G-TG--GG-T--AG-C-A-AA-----CA--GG |     |   |   |   |    |    |   |   |    |   |   |   |   |   |   |   |   |   |   |    |    |   |   |   |   |   |   |   |
| Bacteria(100);Firmicutes(100);Bacilli(100);Lactobacillales(51);unclassified;unclassified;unclassified;unclassified;unclassified;                                                                                                                                                                                                                                                                                                                                                                                                                                                                                                            |     |   |   |   |    |    |   |   |    |   |   |   |   |   |   |   |   |   |   |    |    |   |   |   |   |   |   |   |

|                                                                                                                                                                                                                                                                                                                                                                                                                                                                                                                                                                                                                                             |   |   |   |   |   |   |   |   |    |    |   |   |   |   |   |   |     |     |    |   |   |   |   |   |   |   |   |   |
|---------------------------------------------------------------------------------------------------------------------------------------------------------------------------------------------------------------------------------------------------------------------------------------------------------------------------------------------------------------------------------------------------------------------------------------------------------------------------------------------------------------------------------------------------------------------------------------------------------------------------------------------|---|---|---|---|---|---|---|---|----|----|---|---|---|---|---|---|-----|-----|----|---|---|---|---|---|---|---|---|---|
| Otu0262                                                                                                                                                                                                                                                                                                                                                                                                                                                                                                                                                                                                                                     | 0 | 0 | 0 | 0 | 0 | 1 | 0 | 0 | 0  | 0  | 0 | 0 | 0 | 0 | 0 | 0 | 0   | 0   | 0  | 0 | 0 | 0 | 0 | 0 | 0 | 0 | 0 | 0 |
|                                                                                                                                                                                                                                                                                                                                                                                                                                                                                                                                                                                                                                             | 0 | 0 | 0 | 2 | 0 | 0 | 0 | 0 | 30 | 30 | 2 | 0 | 0 | 0 | 0 | 0 | 230 | 0   | 0  | 0 | 0 | 0 | 0 | 0 | 7 | 0 | 0 | 0 |
|                                                                                                                                                                                                                                                                                                                                                                                                                                                                                                                                                                                                                                             | 0 | 0 | 0 | 0 | 0 | 0 | 0 | 0 | 0  | 9  | 3 | 5 | 0 | 0 | 0 | 0 | 23  | 207 | 69 | 1 | 0 | 0 | 0 | 0 | 0 | 0 | 0 | 0 |
|                                                                                                                                                                                                                                                                                                                                                                                                                                                                                                                                                                                                                                             | 0 | 0 | 0 | 0 | 0 | 0 | 0 | 0 | 0  | 0  | 0 | 0 | 0 | 0 | 0 | 0 | 0   | 0   | 0  | 0 | 0 | 0 | 0 | 0 | 0 | 0 | 0 |   |
| M02255_77_000000000-ADUT3_1_1105_9629_13218 G---AC---GA-AG-GGG-----GCT-A-G-----C-G--T---T-GT-T-CGG-AA-----TT-A-C-T--GG-GC-----GT--A---AA-GC-GC-GT-----G-TA-G-G-C-G-----G--T-TG-T-T-C-----AA---G-T-C-G-----G-G-T--G--TG--A-AA-GC--C-T-TG-A-G-----CT-C-AA-----C-T-C-A-A-G-A-A-A---T-G-C-A--C-T-----C--GG-T-A--C-----T-G-G--AT--G-A-C---T-A-G-A-G-G-A--C-CG-----GA-G-A-----G-G-A-T--AG-T-----GG--A--ATT---C-C-C-A-GT--GT-A-G-TG-GT--G---A--A-A---TA-C-GT-AG--AG-A-TT--G-G--G-A-A-G-A-AC-A-CC--AG--T--G--GC-GAA-G--G-C-G-----G--C-T-A-T---CTG--G--AC-G-G-----T-T---T-C-T--GA--CG-C-T-A--A-GA--C-G-CG-A-AA-G-C--G-TG--GG-G--AG-C-A-AA-----CA--GG |   |   |   |   |   |   |   |   |    |    |   |   |   |   |   |   |     |     |    |   |   |   |   |   |   |   |   |   |
| Bacteria(100);Proteobacteria(100);Alphaproteobacteria(100);Rhodospirillales(100);wr0007(100);unclassified(100);unclassified(100);unclassified(100);unclassified(100);                                                                                                                                                                                                                                                                                                                                                                                                                                                                       |   |   |   |   |   |   |   |   |    |    |   |   |   |   |   |   |     |     |    |   |   |   |   |   |   |   |   |   |

|                                                                                                                                                                                                                                                                                                                                                                                                                                                                                                                                                                                                                                               |   |   |   |   |   |    |   |    |   |   |    |   |    |   |   |   |    |   |   |    |    |   |   |   |    |     |     |   |
|-----------------------------------------------------------------------------------------------------------------------------------------------------------------------------------------------------------------------------------------------------------------------------------------------------------------------------------------------------------------------------------------------------------------------------------------------------------------------------------------------------------------------------------------------------------------------------------------------------------------------------------------------|---|---|---|---|---|----|---|----|---|---|----|---|----|---|---|---|----|---|---|----|----|---|---|---|----|-----|-----|---|
| Otu0263                                                                                                                                                                                                                                                                                                                                                                                                                                                                                                                                                                                                                                       | 0 | 0 | 0 | 0 | 0 | 0  | 0 | 0  | 0 | 0 | 0  | 0 | 0  | 2 | 0 | 0 | 4  | 0 | 0 | 0  | 0  | 0 | 0 | 0 | 0  | 0   | 0   | 0 |
|                                                                                                                                                                                                                                                                                                                                                                                                                                                                                                                                                                                                                                               | 0 | 0 | 0 | 6 | 0 | 41 | 0 | 54 | 1 | 0 | 17 | 0 | 52 | 0 | 0 | 2 | 7  | 0 | 0 | 26 | 17 | 0 | 2 | 0 | 12 | 0   | 104 | 3 |
|                                                                                                                                                                                                                                                                                                                                                                                                                                                                                                                                                                                                                                               | 0 | 0 | 2 | 0 | 0 | 0  | 0 | 0  | 0 | 0 | 0  | 0 | 0  | 0 | 0 | 0 | 10 | 0 | 0 | 0  | 7  | 0 | 0 | 0 | 42 | 267 | 16  | 0 |
|                                                                                                                                                                                                                                                                                                                                                                                                                                                                                                                                                                                                                                               | 0 | 0 | 0 | 0 | 0 | 0  | 0 | 0  | 0 | 0 | 0  | 0 | 0  | 0 | 0 | 0 | 0  | 0 | 0 | 0  | 0  | 0 | 0 | 0 | 0  | 0   | 0   |   |
| M02255_77_000000000-ADUT3_1_1110_22746_10224 T---AC---GT-AG-GGT-----GCG-A-G-----C-G--T---T-GT-C-CGG-AA-----TT-A-C-T--GG-GC-----GT--A---AA-GA-GT-TC-----G-TA-G-G-C-G-----G--T-TT-G-T-C-----GC---G-T-C-G-----T-G-T--G--TG--A-AA-TC--C-C-GC-A-G-----CT-C-AA-----C-T-G-C-G-G-G--C-T---T-G-C-A--G-G-----C--GA-T-A--C-----G--G-G--CA--G-A-C---T-T-G-A-G-T--A--C-TG---CA-G-G-----G-G-A-G--AC-T-----GG--A--ATT---C-C-T-G-GT--GT-A-G-CG-GT--G---A--A-A---TG-C-GC-AG--AT-A-TC--A-G--G-A-G-G-A-AC-A-CC--GG--T--G--GC-GAA-G--G-C-G-----G--G-T-C-T---CTG--G--GC-A-G-----T-A---A-C-T--GA--CG-C-T-G--A-GG--A-A-CG-A-AA-G-C--G-TG--GG-T--AG-C-G-AA-----CA--GG |   |   |   |   |   |    |   |    |   |   |    |   |    |   |   |   |    |   |   |    |    |   |   |   |    |     |     |   |
| Bacteria(100);Actinobacteria(100);Actinobacteria(100);Actinobacteridae(100);Actinomycetales(100);Corynebacterineae(100);Nocardiaceae(99);Rhodococcus(99);unclassified(99);                                                                                                                                                                                                                                                                                                                                                                                                                                                                    |   |   |   |   |   |    |   |    |   |   |    |   |    |   |   |   |    |   |   |    |    |   |   |   |    |     |     |   |

|                                                                                                                                                                                                                                                                                                                                                                                                                                                                                                                                                                                                                                          |   |   |   |   |   |   |   |   |   |   |   |   |   |   |   |   |   |   |   |   |   |   |   |   |   |   |    |   |
|------------------------------------------------------------------------------------------------------------------------------------------------------------------------------------------------------------------------------------------------------------------------------------------------------------------------------------------------------------------------------------------------------------------------------------------------------------------------------------------------------------------------------------------------------------------------------------------------------------------------------------------|---|---|---|---|---|---|---|---|---|---|---|---|---|---|---|---|---|---|---|---|---|---|---|---|---|---|----|---|
| Otu0264                                                                                                                                                                                                                                                                                                                                                                                                                                                                                                                                                                                                                                  | 0 | 0 | 0 | 0 | 1 | 0 | 0 | 0 | 0 | 0 | 0 | 0 | 0 | 0 | 0 | 0 | 0 | 0 | 0 | 0 | 0 | 0 | 0 | 0 | 0 | 2 | 0  | 0 |
|                                                                                                                                                                                                                                                                                                                                                                                                                                                                                                                                                                                                                                          | 0 | 6 | 1 | 0 | 0 | 0 | 2 | 0 | 0 | 0 | 0 | 0 | 1 | 0 | 5 | 0 | 0 | 0 | 1 | 0 | 5 | 0 | 0 | 0 | 0 | 0 | 0  | 0 |
|                                                                                                                                                                                                                                                                                                                                                                                                                                                                                                                                                                                                                                          | 0 | 0 | 0 | 0 | 0 | 0 | 0 | 0 | 0 | 0 | 0 | 0 | 0 | 1 | 2 | 0 | 0 | 0 | 0 | 2 | 0 | 1 | 0 | 0 | 0 | 0 | 31 | 5 |
|                                                                                                                                                                                                                                                                                                                                                                                                                                                                                                                                                                                                                                          | 0 | 0 | 0 | 1 | 0 | 0 | 0 | 0 | 0 | 0 | 1 | 0 | 0 | 0 | 0 | 0 | 0 | 0 | 0 | 0 | 0 | 0 | 0 | 0 | 0 | 0 | 0  |   |
| M02255_77_000000000-ADUT3_1_2114_7771_7549 C---TA---AC-TC-TGT-----GCC-A-G-----C-----A--G--CC-G-CGG-TA-----AT-A-C-A--GA-GG-----GT-----GC-GA-GC-G-----T-TA-A-T-C-G-----G--C-TT-T-T-T-----AA---G-T-C-G-----G-A-T--G--TG--A-AA-TC--C-C-TG-A-G-----CT-T-AA-----C-T-T-A-G-G-A-A-T---T-G-C-A--T-T-----C--GA-T-A--C-----T-G-G--GA--A-G-C---T-A-G-A-G-T--A--T-GG---GA-G-A-----G-G-A-T--GG-T-----AG--A--ATT---C-C-A-G-GT--GT-A-G-CG-GT--G---A--A-A---TG-C-GT-AG--AG-A-TC--T-G--G-A-G-G-A-AT-A-CC--GA--T--G--GC-GAA-G--G-C-A-----G--C-C-A-T---CTG--G--CC-T-A-----A-T---A-C-T--GA--CG-C-T-G--A-GG--T-A-CG-A-AA-G-C--A-TG--GG-G--AG-C-A-AA-----CA--GG |   |   |   |   |   |   |   |   |   |   |   |   |   |   |   |   |   |   |   |   |   |   |   |   |   |   |    |   |
| Bacteria(100);Proteobacteria(100);Gammaproteobacteria(100);Pseudomonadales(100);Moraxellaceae(100);Acinetobacter(100);unclassified(100);unclassified(100);unclassified(100);                                                                                                                                                                                                                                                                                                                                                                                                                                                             |   |   |   |   |   |   |   |   |   |   |   |   |   |   |   |   |   |   |   |   |   |   |   |   |   |   |    |   |



|                                                                                                                                                                                                                                |     |     |    |     |     |    |    |    |    |    |    |    |    |     |     |    |     |     |    |     |     |    |     |    |   |    |    |     |
|--------------------------------------------------------------------------------------------------------------------------------------------------------------------------------------------------------------------------------|-----|-----|----|-----|-----|----|----|----|----|----|----|----|----|-----|-----|----|-----|-----|----|-----|-----|----|-----|----|---|----|----|-----|
| Otu0265                                                                                                                                                                                                                        | 121 | 0   | 0  | 0   | 0   | 0  | 0  | 0  | 0  | 0  | 0  | 3  | 0  | 0   | 0   | 0  | 0   | 0   | 0  | 0   | 6   | 0  | 0   | 16 | 0 | 1  | 0  | 2   |
| 17                                                                                                                                                                                                                             | 30  | 127 | 0  | 52  | 21  | 44 | 11 | 10 | 23 | 0  | 46 | 54 | 0  | 192 | 17  | 0  | 0   | 0   | 57 | 117 | 132 | 0  | 27  | 27 | 1 | 0  | 0  | 114 |
| 0                                                                                                                                                                                                                              | 19  | 3   | 0  | 0   | 0   | 0  | 0  | 0  | 0  | 0  | 10 | 2  | 0  | 243 | 141 | 28 | 19  | 0   | 60 | 40  | 3   | 8  | 0   | 14 | 0 | 0  | 16 | 0   |
| 7                                                                                                                                                                                                                              | 0   | 12  | 7  | 162 | 0   | 11 | 3  | 0  | 16 | 0  | 0  | 0  | 14 | 0   | 21  | 0  | 167 | 0   | 10 | 0   | 0   | 56 | 1   | 8  | 0 | 15 |    |     |
| M02255_76_000000000-ADUNE_1_1102_22157_12134                                                                                                                                                                                   |     |     |    |     |     |    |    |    |    |    |    |    |    |     |     |    |     |     |    |     |     |    |     |    |   |    |    |     |
| .....AC---T-AC-GT-----GCC-A-G-----C--A--G---C--CG-C-GGT-AA-----TA-C--G-T--AG-GT-----GG--C-----AA-GC-G--TT-----G-TC-C-G--G-----A--T-CT-T-T-T-----                                                                               |     |     |    |     |     |    |    |    |    |    |    |    |    |     |     |    |     |     |    |     |     |    |     |    |   |    |    |     |
| AA---G-T-C-T-----G-A-T--G--TG--A-AA-GC--C-C-TC-G-G-----CT-C-AA-----C-C-G-A-G-G-A--A-----G-GT-C-A---T--T-----G--GA-A-A---C-----T--G-G--GA-G-A-C---T-T-G-A-G-T--G--C-AG-----AA-G-A-----G-G-A-G--AG-T-----GG--A--ATT---C-C-       |     |     |    |     |     |    |    |    |    |    |    |    |    |     |     |    |     |     |    |     |     |    |     |    |   |    |    |     |
| A-T-GT--GT-A-G-CG-GT--G---A--A-A---TG-C-GT-AG--AT-A-TA--T-G--G-A-G-G-A-AC-A-CC---AG--T--G--GC-GAA-G--G-C-G-----A--C-T-C-T---CTG--G--TC-T-G-----T-A---A-C-T--GA--CG-C-T-G--A-GG--C-T-CG-A--AA-G-C---G-TG--GG-G--                |     |     |    |     |     |    |    |    |    |    |    |    |    |     |     |    |     |     |    |     |     |    |     |    |   |    |    |     |
| AG-C-A-AA-----CA--GG Bacteria(100);Firmicutes(100);Bacilli(100);unclassified(69);unclassified(69);unclassified(69);unclassified(69);unclassified(69);unclassified(69);                                                         |     |     |    |     |     |    |    |    |    |    |    |    |    |     |     |    |     |     |    |     |     |    |     |    |   |    |    |     |
| Otu0266                                                                                                                                                                                                                        | 0   | 0   | 0  | 0   | 0   | 0  | 22 | 0  | 0  | 0  | 0  | 0  | 0  | 0   | 0   | 0  | 0   | 0   | 0  | 0   | 0   | 0  | 0   | 0  | 0 | 0  | 0  | 0   |
| 0                                                                                                                                                                                                                              | 0   | 0   | 0  | 0   | 0   | 0  | 0  | 0  | 0  | 0  | 0  | 0  | 0  | 0   | 0   | 0  | 0   | 0   | 0  | 0   | 0   | 0  | 0   | 0  | 0 | 0  | 0  | 0   |
| 0                                                                                                                                                                                                                              | 0   | 0   | 0  | 0   | 0   | 0  | 0  | 0  | 0  | 0  | 0  | 0  | 0  | 102 | 132 | 0  | 0   | 0   | 0  | 0   | 0   | 0  | 102 | 0  | 0 | 0  | 0  | 0   |
| 0                                                                                                                                                                                                                              | 0   | 103 | 0  | 0   | 0   | 0  | 0  | 0  | 0  | 0  | 0  | 0  | 0  | 0   | 0   | 0  | 0   | 0   | 0  | 0   | 0   | 0  | 0   | 0  | 0 | 0  | 0  | 0   |
| M02255_77_000000000-ADUT3_1_1105_8175_14299                                                                                                                                                                                    |     |     |    |     |     |    |    |    |    |    |    |    |    |     |     |    |     |     |    |     |     |    |     |    |   |    |    |     |
| T---AC---GT-AG-GAT-----CCG-A-G-----C--G--T---T--AT-C-CGG-AG-----TG-A--C-T--GG-GC-----GT--A-----AA-GA-GTTGC-----G-TA-G-G-C-G-----G--T-TG-T-A-T-----                                                                             |     |     |    |     |     |    |    |    |    |    |    |    |    |     |     |    |     |     |    |     |     |    |     |    |   |    |    |     |
| AA---G-T-G-A-----A-T-A--G--TG--A-AA-TC--T-G-GT-G-G-----CT-C-AA-----C-C-A-T-ACA-G--G-C---T-A--T-T---A--T-----T--CA-A-A---C-----T--G-T--AC--A-A-C---T-C-G-A-G-A--G---T-GG-----TA-G-A-----G-G-T-C--AC-T-----GG--A--ATT---T-C-T-   |     |     |    |     |     |    |    |    |    |    |    |    |    |     |     |    |     |     |    |     |     |    |     |    |   |    |    |     |
| T-GT--GT-A-G-GA-GT--G---A--A-A---TC-C-GT-AG--AT-A-TA--A-G--A-A-G-G-A-AC-A-CC---GA--T--G--GC-GTA-G--G-C-A-----G--G-T-G-A---CTG--G--AC-C-A-----T-T---T-C-T--GA--CG-C-T-A--A-GG--C-A-CG-A--AA-G-C---G-TG--GG-G--AG-               |     |     |    |     |     |    |    |    |    |    |    |    |    |     |     |    |     |     |    |     |     |    |     |    |   |    |    |     |
| C-G-AA-----CC--GG Bacteria(100);Candidate_division_TM7(100);unclassified(100);unclassified(100);unclassified(100);unclassified(100);unclassified(100);unclassified(100);unclassified(100);                                     |     |     |    |     |     |    |    |    |    |    |    |    |    |     |     |    |     |     |    |     |     |    |     |    |   |    |    |     |
| Otu0267                                                                                                                                                                                                                        | 0   | 0   | 0  | 0   | 0   | 0  | 0  | 0  | 58 | 0  | 0  | 0  | 0  | 0   | 0   | 0  | 0   | 0   | 0  | 0   | 0   | 0  | 0   | 0  | 0 | 0  | 0  | 0   |
| 0                                                                                                                                                                                                                              | 0   | 0   | 0  | 0   | 0   | 0  | 0  | 0  | 0  | 0  | 0  | 0  | 0  | 0   | 0   | 0  | 0   | 0   | 0  | 0   | 0   | 0  | 0   | 0  | 0 | 8  | 0  |     |
| 0                                                                                                                                                                                                                              | 0   | 0   | 0  | 0   | 0   | 3  | 0  | 2  | 0  | 0  | 0  | 0  | 0  | 0   | 0   | 0  | 20  | 0   | 0  | 0   | 0   | 0  | 0   | 0  | 0 | 0  | 0  | 0   |
| 36                                                                                                                                                                                                                             | 0   | 173 | 0  | 0   | 0   | 0  | 0  | 0  | 0  | 0  | 0  | 0  | 0  | 0   | 43  | 0  | 0   | 0   | 0  | 0   | 167 | 0  | 0   | 16 | 0 | 0  |    |     |
| M02255_77_000000000-ADUT3_1_2111_18220_15969                                                                                                                                                                                   |     |     |    |     |     |    |    |    |    |    |    |    |    |     |     |    |     |     |    |     |     |    |     |    |   |    |    |     |
| T---AC---GA-AG-GGG-----GCT-A-G-----C--G--T---T--GC-T-CGG-AA-----TC-A--C-T--GG-GC-----GT--A-----AA-GG-GC-GC-----G-TA-G-G-C-G-----G--C-CG-A-T-C---                                                                               |     |     |    |     |     |    |    |    |    |    |    |    |    |     |     |    |     |     |    |     |     |    |     |    |   |    |    |     |
| -----AA---G-T-C-A-----G-G-G--G--TG--A-AA-GC--C-T-GT-G-G-----CT-C-AA-----C-C-A-C-A-G-A--A-T---T-G--C-C---T--T-----T--GA-T-A---C-----T--G-A--TG--G-T-C---T-C-G-A-G-A--C---C-GG-----AA-G-A-----G-G-T-T---GG-T-----GG--A--ACT---   |     |     |    |     |     |    |    |    |    |    |    |    |    |     |     |    |     |     |    |     |     |    |     |    |   |    |    |     |
| G-C-G-A-GT--GT-A-G-AG-GT--G---A--A-A---TT-C-GT-AG--AT-A-TT--C-G--C-A-A-G-A-AC-A-CC---AG--T--G--GC-GAA-G--G-C-G-----G--C-C-A-A---CTG--G--TC-C-G-----G-T---T-C-T--GA--CG-C-T-G--A-GG--C-G-CG-A--AA-G-C---G-TG--GG-               |     |     |    |     |     |    |    |    |    |    |    |    |    |     |     |    |     |     |    |     |     |    |     |    |   |    |    |     |
| G--AG-C-A-AA-----CA--GG Bacteria(100);Proteobacteria(100);Alphaproteobacteria(100);Rhizobiales(100);unclassified(100);unclassified(100);unclassified(100);unclassified(100);unclassified(100);                                 |     |     |    |     |     |    |    |    |    |    |    |    |    |     |     |    |     |     |    |     |     |    |     |    |   |    |    |     |
| Otu0268                                                                                                                                                                                                                        | 0   | 0   | 0  | 0   | 0   | 0  | 0  | 0  | 0  | 0  | 0  | 0  | 0  | 0   | 0   | 0  | 0   | 0   | 0  | 7   | 12  | 0  | 0   | 0  | 0 | 0  | 0  | 0   |
| 0                                                                                                                                                                                                                              | 0   | 0   | 0  | 0   | 0   | 0  | 0  | 0  | 47 | 4  | 0  | 0  | 0  | 0   | 0   | 0  | 0   | 0   | 0  | 0   | 0   | 0  | 0   | 0  | 0 | 0  | 0  | 0   |
| 0                                                                                                                                                                                                                              | 32  | 516 | 35 | 30  | 0   | 3  | 0  | 0  | 5  | 63 | 0  | 0  | 0  | 0   | 12  | 0  | 0   | 358 | 75 | 0   | 0   | 0  | 0   | 0  | 0 | 0  | 13 | 0   |
| 0                                                                                                                                                                                                                              | 0   | 0   | 0  | 0   | 0   | 0  | 0  | 0  | 0  | 0  | 0  | 0  | 0  | 0   | 0   | 0  | 0   | 0   | 0  | 0   | 0   | 0  | 0   | 0  | 0 | 0  | 0  | 0   |
| M02255_77_000000000-ADUT3_1_1119_28631_13003                                                                                                                                                                                   |     |     |    |     |     |    |    |    |    |    |    |    |    |     |     |    |     |     |    |     |     |    |     |    |   |    |    |     |
| T---AC---GA-AG-GGG-----GCT-A-G-----C--G--T---T--GT-T-CGG-AA-----TC-A--C-T--GG-GC-----GT--A-----AA-GC-GC-AC-----G-TA-G-G-C-G-----G--A-CC-A-T-T-----                                                                             |     |     |    |     |     |    |    |    |    |    |    |    |    |     |     |    |     |     |    |     |     |    |     |    |   |    |    |     |
| -----AA---G-T-C-A-----G-G-G--G--TG--A-AA-GC--C-T-GG-A-G-----CT-C-AA-----C-T-C-C-A-G-A--A-C---T-G--C-C---T--T-----T--GA-T-A---C-----T--G-A--TG--G-T-C---T-C-G-A-G-T--T---C-GG-----AA-G-A-----G-G-T-T---GG-T-----GG--A--ACT---G- |     |     |    |     |     |    |    |    |    |    |    |    |    |     |     |    |     |     |    |     |     |    |     |    |   |    |    |     |
| C-G-A-GT--GT-A-G-AG-GT--G---A--A-A---TT-C-GT-AG--AT-A-TT--C-G--C-A-A-G-A-AC-A-CC---AG--T--G--GC-GAA-G--G-C-G-----G--C-C-A-A---CTG--G--TC-C-G-----A-T---A-C-T--GA--CG-C-T-G--A-GG--T-G-CG-A--AA-G-C---G-TG--GG-G-               |     |     |    |     |     |    |    |    |    |    |    |    |    |     |     |    |     |     |    |     |     |    |     |    |   |    |    |     |
| -AG-C-A-AA-----CA--GG Bacteria(100);Proteobacteria(100);Alphaproteobacteria(100);Rhizobiales(100);Hyphomicrobiaceae(100);unclassified(94);unclassified(94);unclassified(94);unclassified(94);                                  |     |     |    |     |     |    |    |    |    |    |    |    |    |     |     |    |     |     |    |     |     |    |     |    |   |    |    |     |
| Otu0269                                                                                                                                                                                                                        | 0   | 0   | 0  | 0   | 234 | 0  | 0  | 0  | 0  | 0  | 0  | 0  | 0  | 0   | 0   | 0  | 0   | 0   | 0  | 0   | 0   | 0  | 0   | 0  | 0 | 0  | 0  | 0   |
| 0                                                                                                                                                                                                                              | 0   | 0   | 0  | 0   | 0   | 0  | 0  | 0  | 0  | 0  | 0  | 0  | 0  | 0   | 0   | 0  | 0   | 0   | 0  | 0   | 0   | 0  | 0   | 0  | 0 | 0  | 0  | 0   |
| 0                                                                                                                                                                                                                              | 0   | 0   | 0  | 0   | 0   | 0  | 0  | 0  | 0  | 0  | 0  | 0  | 0  | 0   | 0   | 0  | 0   | 46  | 0  | 0   | 0   | 0  | 0   | 0  | 0 | 0  | 0  | 0   |
| 0                                                                                                                                                                                                                              | 0   | 51  | 0  | 0   | 0   | 0  | 0  | 0  | 0  | 0  | 0  | 0  | 0  | 0   | 0   | 0  | 0   | 0   | 0  | 0   | 0   | 0  | 0   | 0  | 0 | 0  |    |     |
| M02255_77_000000000-ADUT3_1_1114_22211_10961                                                                                                                                                                                   |     |     |    |     |     |    |    |    |    |    |    |    |    |     |     |    |     |     |    |     |     |    |     |    |   |    |    |     |
| T---AC---GT-AG-GGG-----GCA-A-G-----C--G--T---T--GT-C-CGG-AA-----TG-A--T-T--GG-GC-----GT--A-----AA-GG-GC-GC-----G-TA-G-G-C-G-----G--C-TA-T-T-T-----                                                                             |     |     |    |     |     |    |    |    |    |    |    |    |    |     |     |    |     |     |    |     |     |    |     |    |   |    |    |     |
| -----AA---G-T-C-T-----G-G-A--G--TG--A-AA-GT--C-C-TG-C-T-----TT-C-AA-----G-G-T-G-G-G-A--A-T---T-G--C-T---T--T-----G--GA-T-A---C-----T--G-G--AT--A-G-C---T-T-G-A-G-T--G---C-AG-----GA-G-A-----G-G-T-A---AG-T-----GG--A--ATT---   |     |     |    |     |     |    |    |    |    |    |    |    |    |     |     |    |     |     |    |     |     |    |     |    |   |    |    |     |
| C-C-C-A-GT--GT-A-G-CG-GT--G---A--A-A---TG-C-GT-AG--AG-A-TT--G-G--G-A-G-G-A-AC-A-CC---AG--T--G--GC-GAA-G--G-C-G-----A--C-T-T-A---CTG--G--AC-T-G-----T-A---A-C-T--GA--CG-C-T-G--A-GG--C-G-CG-A--AA-G-T---G-TG--                  |     |     |    |     |     |    |    |    |    |    |    |    |    |     |     |    |     |     |    |     |     |    |     |    |   |    |    |     |
| GG-G--AG-C-A-AA-----CA--GG Bacteria(100);Firmicutes(100);Clostridia(100);Clostridiales(100);Lachnospiraceae(71);uncultured(71);unclassified(71);unclassified(71);unclassified(71);                                             |     |     |    |     |     |    |    |    |    |    |    |    |    |     |     |    |     |     |    |     |     |    |     |    |   |    |    |     |



|                                                                                                                                                                                                                            |    |    |     |     |   |    |     |    |     |                                                                                                                                                     |     |   |   |    |   |    |    |   |    |    |   |    |     |   |    |   |    |
|----------------------------------------------------------------------------------------------------------------------------------------------------------------------------------------------------------------------------|----|----|-----|-----|---|----|-----|----|-----|-----------------------------------------------------------------------------------------------------------------------------------------------------|-----|---|---|----|---|----|----|---|----|----|---|----|-----|---|----|---|----|
| Otu0270                                                                                                                                                                                                                    | 0  | 98 | 105 | 6   | 0 | 0  | 124 | 5  | 294 | 0                                                                                                                                                   | 0   | 0 | 0 | 0  | 1 | 0  | 0  | 0 | 0  | 0  | 0 | 3  | 0   | 0 | 0  | 0 | 0  |
|                                                                                                                                                                                                                            | 0  | 0  | 0   | 2   | 0 | 0  | 0   | 0  | 0   | 0                                                                                                                                                   | 68  | 0 | 0 | 2  | 0 | 0  | 0  | 0 | 0  | 0  | 0 | 0  | 0   | 0 | 0  | 0 | 0  |
|                                                                                                                                                                                                                            | 0  | 0  | 0   | 0   | 0 | 0  | 0   | 0  | 0   | 0                                                                                                                                                   | 0   | 0 | 0 | 0  | 0 | 0  | 0  | 0 | 0  | 0  | 0 | 0  | 0   | 0 | 0  | 0 | 0  |
|                                                                                                                                                                                                                            | 0  | 0  | 0   | 0   | 0 | 0  | 0   | 0  | 0   | 0                                                                                                                                                   | 0   | 0 | 0 | 0  | 0 | 0  | 0  | 0 | 0  | 0  | 0 | 0  | 57  | 0 | 0  |   |    |
| M02255_76_000000000-ADUNE_1_1106_26377_14763                                                                                                                                                                               |    |    |     |     |   |    |     |    |     | T---CG---GC-TA-ACT-----CCG-T-G-----C--C--A--G--CA-G-CCG-CG-----GT-A--A-T--AC-GG-----AG--G-----AT-CC-GA-GC-----GTTA-T-C-C-G-----G--ATTT-A-T-T-----   |     |   |   |    |   |    |    |   |    |    |   |    |     |   |    |   |    |
| -----AA---G-T-C-A-----G-T-T--G--TG--A-AA-GT--T-T-GC-G-G-----CT-C-AA-----C-C-G-T-A-A-A--A-T---T-G--C-A--G--T-----T--GA-T-A--C-----T--G-G--GT--G-T-C---T-T-G-A-G-T--A--C-AG---TA-G-A-----G-G-C-A--GG-C-----GG--A--ATT---C-   |    |    |     |     |   |    |     |    |     |                                                                                                                                                     |     |   |   |    |   |    |    |   |    |    |   |    |     |   |    |   |    |
| G-T-G-GT--GT-A-G-CG-GT--G---A--A-A---TG-C-TT-AG--AT-A-TC--A-C--G-A-A-G-A-AC-T-CC---GA--T--T--GC-GAA-G--G-C-A-----G--C-T-T-G---CTG--G--AC-T-G-----T-A--A-C-T--GA--CG-C-T-G--A-TG--C-T-CG-A--AA-G-T---G-TG--GG-T--           |    |    |     |     |   |    |     |    |     |                                                                                                                                                     |     |   |   |    |   |    |    |   |    |    |   |    |     |   |    |   |    |
| AT-C-A-AA-----CA--GG Bacteria(100);Bacteroidetes(100);Bacteroidia(100);Bacteroidales(100);Bacteroidaceae(100);Bacteroides(100);unclassified(100);unclassified(100);unclassified(100);                                      |    |    |     |     |   |    |     |    |     |                                                                                                                                                     |     |   |   |    |   |    |    |   |    |    |   |    |     |   |    |   |    |
| Otu0271                                                                                                                                                                                                                    | 0  | 0  | 0   | 0   | 0 | 0  | 0   | 0  | 0   | 0                                                                                                                                                   | 0   | 0 | 0 | 0  | 0 | 0  | 0  | 0 | 0  | 0  | 0 | 0  | 0   | 0 | 0  | 0 | 0  |
|                                                                                                                                                                                                                            | 0  | 0  | 0   | 0   | 0 | 0  | 49  | 17 | 0   | 0                                                                                                                                                   | 0   | 0 | 0 | 0  | 0 | 0  | 0  | 0 | 0  | 0  | 0 | 32 | 0   | 0 | 0  | 0 | 0  |
|                                                                                                                                                                                                                            | 0  | 0  | 0   | 0   | 0 | 0  | 0   | 0  | 0   | 0                                                                                                                                                   | 0   | 0 | 0 | 0  | 0 | 0  | 0  | 0 | 0  | 0  | 0 | 0  | 0   | 0 | 0  | 0 | 0  |
|                                                                                                                                                                                                                            | 0  | 0  | 0   | 0   | 0 | 0  | 0   | 0  | 0   | 0                                                                                                                                                   | 0   | 0 | 0 | 0  | 0 | 0  | 0  | 0 | 0  | 0  | 0 | 0  | 0   | 0 | 0  |   |    |
| M02255_77_000000000-ADUT3_1_1104_15415_3015                                                                                                                                                                                |    |    |     |     |   |    |     |    |     | G---AC---AG-AG-GCC-----ACG-A-G-----C--G--T---T--AG-G-CGG-AA-----TC-A--C-T--GG-GC-----TT--A---AA-GC-GT-GT-----G-TA-G-G-C-G-----G--A-CC-G-T-T-----    |     |   |   |    |   |    |    |   |    |    |   |    |     |   |    |   |    |
| AA---G-T-GCC-----C-G-C--G--TG--A-AA-TC--C-C-CC-G-G-----CT-C-AA-----C-C-G-G-G-G-A--A-C---G-G--C-C--G--G-----G--CA-T-A--C-----T--G-G--CG--G-T-C---T-T-G-A-G-C--G---A-TC---CA-G-G-----G-G-T-C---AT-C-----GG--A--ACA---A-A-    |    |    |     |     |   |    |     |    |     |                                                                                                                                                     |     |   |   |    |   |    |    |   |    |    |   |    |     |   |    |   |    |
| C-G-GT--GG-A-G-CG-GT--G---A--A-A---TG-C-GT-AG--AT-A-TC--G-T--T-T-G-G-A-AC-G-CC---GA--C--G--GT-GAA-A--A-C-A-----G--A-T-G-A---CTG--G--GG-A-T-----C-C---G-C-T--GA--CG-C-T-G--A-GA--C-A-CG-A--AA-G-C---C-AG--GG-G--            |    |    |     |     |   |    |     |    |     |                                                                                                                                                     |     |   |   |    |   |    |    |   |    |    |   |    |     |   |    |   |    |
| AG-C-A-AA-----CG--GG Bacteria(100);Planctomycetes(100);unclassified(80);unclassified(80);unclassified(80);unclassified(80);unclassified(80);unclassified(80);unclassified(80);                                             |    |    |     |     |   |    |     |    |     |                                                                                                                                                     |     |   |   |    |   |    |    |   |    |    |   |    |     |   |    |   |    |
| Otu0272                                                                                                                                                                                                                    | 0  | 0  | 0   | 0   | 0 | 0  | 0   | 0  | 0   | 0                                                                                                                                                   | 0   | 0 | 0 | 11 | 0 | 0  | 0  | 0 | 0  | 0  | 0 | 73 | 0   | 0 | 0  | 0 | 31 |
|                                                                                                                                                                                                                            | 0  | 0  | 47  | 0   | 0 | 1  | 0   | 0  | 0   | 0                                                                                                                                                   | 0   | 0 | 0 | 0  | 0 | 0  | 0  | 0 | 0  | 0  | 0 | 0  | 0   | 0 | 0  | 0 | 0  |
|                                                                                                                                                                                                                            | 0  | 0  | 0   | 0   | 0 | 0  | 0   | 0  | 0   | 0                                                                                                                                                   | 0   | 0 | 0 | 0  | 0 | 0  | 0  | 0 | 0  | 0  | 0 | 0  | 0   | 0 | 0  | 0 | 0  |
|                                                                                                                                                                                                                            | 35 | 0  | 0   | 0   | 0 | 0  | 0   | 0  | 0   | 0                                                                                                                                                   | 0   | 0 | 0 | 0  | 0 | 0  | 0  | 0 | 0  | 0  | 0 | 0  | 0   | 0 | 0  |   |    |
| M02255_77_000000000-ADUT3_1_1108_21912_12979                                                                                                                                                                               |    |    |     |     |   |    |     |    |     | T---AC---GG-AG-GGA-----GCT-A-G-----C--G--T---T--GT-T-CGG-AA-----TT-A--C-T--GG-GC-----GT--A---AA-GC-GC-AC-----G-TA-G-G-C-G-----G--C-GA-T-T-T-----    |     |   |   |    |   |    |    |   |    |    |   |    |     |   |    |   |    |
| -----AA---G-T-C-A-----G-A-G--G--TG--A-AA-GC--C-C-GG-G-G-----CT-C-AA-----C-C-C-C-G-G-A--A-C---T-G--C-C---T--T-----T--GA-G-A--C-----T--G-G--AT--T-G-C---T-A-G-A-A-T--C---T-TG---GA-G-A-----G-G-C-G---GG-T-----GG--A--ATT---  |    |    |     |     |   |    |     |    |     |                                                                                                                                                     |     |   |   |    |   |    |    |   |    |    |   |    |     |   |    |   |    |
| C-C-G-A-GT--GT-A-G-AG-GT--G---A--A-A---TT-C-GT-AG--AT-A-TT--C-G--G-A-A-G-A-AC-A-CC---AG--T--G--GC-GAA-G--G-C--G-----G--C-C-C-G---CTG--G--AC-A-A-----G-T---A-T-T--GA--CG-C-T-G--A-GG--T-G-CG-A--AA-G-C---G-TG--             |    |    |     |     |   |    |     |    |     |                                                                                                                                                     |     |   |   |    |   |    |    |   |    |    |   |    |     |   |    |   |    |
| GG-G--AG-C-A-AA-----CA--GG Bacteria(100);Proteobacteria(100);Alphaproteobacteria(100);Sphingomonadales(100);Sphingomonadaceae(100);unclassified(58);unclassified(58);unclassified(58);unclassified(58);                    |    |    |     |     |   |    |     |    |     |                                                                                                                                                     |     |   |   |    |   |    |    |   |    |    |   |    |     |   |    |   |    |
| Otu0273                                                                                                                                                                                                                    | 0  | 0  | 0   | 0   | 0 | 0  | 25  | 0  | 0   | 5                                                                                                                                                   | 0   | 0 | 0 | 0  | 0 | 0  | 0  | 0 | 0  | 0  | 0 | 0  | 0   | 0 | 0  | 0 | 0  |
|                                                                                                                                                                                                                            | 0  | 0  | 1   | 0   | 0 | 0  | 0   | 0  | 0   | 0                                                                                                                                                   | 0   | 0 | 0 | 0  | 0 | 2  | 0  | 0 | 0  | 0  | 0 | 4  | 0   | 0 | 0  | 0 | 0  |
|                                                                                                                                                                                                                            | 0  | 0  | 0   | 0   | 0 | 0  | 0   | 0  | 0   | 0                                                                                                                                                   | 0   | 0 | 0 | 11 | 0 | 0  | 0  | 0 | 0  | 0  | 0 | 0  | 11  | 0 | 0  | 0 | 0  |
|                                                                                                                                                                                                                            | 1  | 0  | 6   | 0   | 0 | 0  | 0   | 0  | 0   | 0                                                                                                                                                   | 0   | 0 | 0 | 0  | 0 | 0  | 0  | 9 | 0  | 0  | 0 | 0  | 0   | 0 | 30 |   |    |
| M02255_76_000000000-ADUNE_1_2104_10888_10766                                                                                                                                                                               |    |    |     |     |   |    |     |    |     | T---CG---GC-TA-ACT-----CCG-T-GC-----C--A--G---C--AG-C-CGC-GG-----TA-A--T-A--CG-GA-----GG--A---TG-CG-AG-CG-----T-TA-T-T-C-G-----G--A-CTCA-T-T-----   |     |   |   |    |   |    |    |   |    |    |   |    |     |   |    |   |    |
| -----AA---G-T-C-A-----G-G-G--G--TG--A-AA-GG--T-T-TC-A-G-----CT-T-AA-----C-T-G-A-G-A-A--A-T---T-G--C-C---T--T-----T--GA-T-A--C-----T--G-G--TA--G-T-C---T-T-G-A-A-T--A--T-CT---GT-G-A-----A-G-T-T---CT-T-----GG--A--ATG---T- |    |    |     |     |   |    |     |    |     |                                                                                                                                                     |     |   |   |    |   |    |    |   |    |    |   |    |     |   |    |   |    |
| G-T-A-GT--GT-A-G-CG-GT--G---A--A-A---TG-C-TT-AG--AT-A-TT--A-C--A-C-A-G-A-AC-A-CC---GA--T--T--GC-GAA-G--G-C--A-----G--G-G-G-A---CTA--A--CA-G-A-----C-A---A-T-T--GA--CG-C-T-G--A-GA--G-A-CG-A--AA-G-C---G-TG--GG-G--         |    |    |     |     |   |    |     |    |     |                                                                                                                                                     |     |   |   |    |   |    |    |   |    |    |   |    |     |   |    |   |    |
| -AG-C-G-AA-----CA--GG Bacteria(100);Bacteroidetes(100);Flavobacteria(100);Flavobacteriales(100);Flavobacteriaceae(100);Capnocytophaga(100);unclassified(100);unclassified(100);unclassified(100);                          |    |    |     |     |   |    |     |    |     |                                                                                                                                                     |     |   |   |    |   |    |    |   |    |    |   |    |     |   |    |   |    |
| Otu0274                                                                                                                                                                                                                    | 0  | 40 | 49  | 128 | 0 | 0  | 549 | 25 | 191 | 0                                                                                                                                                   | 0   | 0 | 5 | 1  | 0 | 0  | 0  | 0 | 0  | 0  | 0 | 0  | 0   | 0 | 0  | 0 | 0  |
|                                                                                                                                                                                                                            | 0  | 0  | 0   | 39  | 0 | 22 | 0   | 0  | 0   | 0                                                                                                                                                   | 130 | 0 | 0 | 0  | 0 | 0  | 0  | 0 | 32 | 0  | 0 | 0  | 0   | 0 | 0  | 0 | 0  |
|                                                                                                                                                                                                                            | 0  | 0  | 0   | 0   | 0 | 0  | 0   | 0  | 0   | 0                                                                                                                                                   | 0   | 0 | 0 | 0  | 0 | 13 | 57 | 0 | 0  | 0  | 0 | 0  | 0   | 0 | 0  | 0 | 0  |
|                                                                                                                                                                                                                            | 0  | 63 | 0   | 0   | 0 | 12 | 0   | 0  | 0   | 0                                                                                                                                                   | 0   | 0 | 0 | 0  | 0 | 0  | 0  | 0 | 0  | 21 | 0 | 9  | 212 | 0 | 0  |   |    |
| M02255_77_000000000-ADUT3_1_1104_24464_2591                                                                                                                                                                                |    |    |     |     |   |    |     |    |     | T---AC---GT-AG-GGG-----GCT-A-G-----C--G--T---T--AT-C-CGG-AA-----TT-A--C-T--GG-GC-----GT--A---AA-GG-GT-GC-----G-TA-G-G-C-G-----G--T-CT-T-T-C-----AA- |     |   |   |    |   |    |    |   |    |    |   |    |     |   |    |   |    |
| ---G-T-C-A-----G-A-A--G--TG--A-AA-GG--C-T-AC-G-G-----CT-C-AA-----C-C-G-T-A-G-T--A-----A-G--C-T---T--T-----T--GA-A-A--C-----T--G-T--AA--G-A-C---T-T-G-A-G-T--G---C-AG---GA-G-A-----G-G-A-G---AG-T-----GG--A--ATT---C-C-T-A- |    |    |     |     |   |    |     |    |     |                                                                                                                                                     |     |   |   |    |   |    |    |   |    |    |   |    |     |   |    |   |    |
| GT--GT-A-G-CG-GT--G---A--A-A---TG-C-GT-AG--AT-A-TT--A-G--G-A-G-G-A-AC-A-CC---AG--T--T--GC-GAA-G--G-C--G-----G--C-T-C-T---CTG--G--AC-T-G-----T-A--A-C-T--GA--CG-C-T-G--A-GG--C-A-CG-A--AA-G-C---G-TG--GG-G--AG-C-           |    |    |     |     |   |    |     |    |     |                                                                                                                                                     |     |   |   |    |   |    |    |   |    |    |   |    |     |   |    |   |    |
| A-AA-----CA--GG Bacteria(100);Firmicutes(100);Clostridia(100);Clostridiales(100);Peptostreptococcaceae(100);Incertae_Sedis(96);unclassified(96);unclassified(96);unclassified(96);                                         |    |    |     |     |   |    |     |    |     |                                                                                                                                                     |     |   |   |    |   |    |    |   |    |    |   |    |     |   |    |   |    |



Otu0275 155 0 0 0 0 0 0 0 0 0 0 0 0 0 0 0 0 0 0 0 0 0 0 0 0 0 0 0 0  
0 0 0 0 0 0 0 0 0 0 0 0 0 0 0 0 0 0 0 0 0 0 0 0 0 0 0 0 0  
0 0 0 0 0 0 0 0 0 0 0 0 0 0 28 0 0 24 0 0 0 0 0 0 0 0 0 0  
0 0 0 69 0 0 0 0 0 0 0 0 0 0 0 0 0 0 0 0 0 0 0 0 0 0 0 0  
M02255\_77\_000000000-ADUT3\_1\_1108\_5590\_9779 T---AC---GA-AG-GGG-----ACT-A-G-----C--G--T---T--GT-T-CGG-AA-----TC-A--C-T--GG-GC-----GT--A----AA-GC-GC-AC-----G-TA-G-G-C-G-----G--A-TT-T-G-T-----AA-  
---G-T-C-A-----G-G-G--G-TG--A-AA-TC--C-C-GG-G-G-----CT-C-AA-----C-C-T-C-G-G-A--A-C---T-G--C-C---T--T-----T--GA-T-A--C-----T--G-C--AA-G-T-C---T-T-G-A-G-T--C---C-GA----TA-G-A-----G-G-T-G---GG-T-----GG--A--ATT---C-C-T-A-  
GT--GT-A-G-AG-GT--G---A--A-A---TT-C-GT-AG--AT-A-TT--A-G--G-A-A-G-A-AC-A-CC---GG--T--G--GC-GAA-G--G-C-G-----G--C-C-C-A---CTG--G--AT-C-G-----G-T---A-C-T--GA--CG-C-T-G--A-GG--T-G-CG-A--AA-G-C---G-TG--GG-G--AG-  
C-A-AA-----CA--GG Bacteria(100);Proteobacteria(100);Alphaproteobacteria(100);Rhizobiales(100);Hyphomicrobiaceae(100);Hyphomicrobium(100);unclassified(100);unclassified(100);unclassified(100);

Otu0276 0 0 0 0 0 0 0 0 0 0 0 0 0 0 0 0 0 0 0 0 0 0 4 0 0 0 3 0 0  
0 0 0 0 0 0 0 27 0 0 0 0 0 0 0 0 0 0 0 0 0 0 0 26 21 0 0 0 0  
0 0 0 0 0 0 0 0 0 0 0 0 0 0 13 0 0 20 0 0 0 4 0 0 0 0 1 0 0  
0 0 0 0 46 0 0 0 0 0 0 0 4 1 0 0 0 0 0 0 0 0 0 0 0 0 0 0  
M02255\_77\_000000000-ADUT3\_1\_1107\_7993\_15723 T---AC---GT-AG-GCA-----GCG-A-G-----C--G--T---T--GT-T-CGG-AG-----TT-A--C-T--GG-GC-----GT--A----AA-GA-GT-GC-----G-TA-G-G-C-G-----G--T-TT-T-C-T-----AA-  
---G-T-T-T-----G-G-T--G-TG--A-AA-TC--T-C-CC-G-G-----CT-T-AA-----C-T-G-G-G-A-G--G-G---T-G--C-G---C-C-----G-AA-G-A--C-----T--G-G-AA--G-G-C---T-T-G-A-G-T--A---T-GG----GA-G-A-----G-G-T-A---AG-C-----GG--A--ATT---C-C-T-G-  
GT--GT-A-G-CG-GT--G---A--A-A---TG-C-GT-AG--AT-A-TC--A-G--G-A-G-G-A-AC-A-CC---TG--C--G--GT-GTA-G--A-C-G-----G--C-T-T-A---CTG--G--AC-C-A-----T-A---A-C-T--GA--CG-C-T-G--A-GG--C-A-CG-A--AA-G-C---G-TG--GG-T--AG-C-  
A-AA-----CA--GG Bacteria(100);Acidobacteria(100);Acidobacteria(100);Acidobacteriales(100);Acidobacteriaceae(100);unclassified(100);unclassified(100);unclassified(100);unclassified(100);

Otu0277 0 0 0 0 0 0 0 0 0 0 0 0 0 0 0 0 0 0 0 0 0 0 0 0 0 0 0 0 2  
0 0 0 0 0 0 0 0 0 0 0 0 0 0 0 0 0 0 0 0 0 0 0 0 0 0 0 0  
0 0 11 0 0 10 9 0 0 1 13 0 0 1 0 0 0 0 27 0 0 0 0 0 0 0 0 0  
33 0 0 23 0 0 0 0 0 13 0 0 0 0 0 0 0 0 0 0 0 0 0 0 0 0 0 0  
M02255\_77\_000000000-ADUT3\_1\_1115\_14772\_17958 T---AC---GA-AG-GGG-----GCT-A-G-----C--G--T---T--GT-T-CGG-AA-----TT-A--C-T--GG-GC-----GT--A----AA-GC-GC-AC-----G-TA-G-G-C-G-----G--A-CA-T-T-T-----  
-----AA---G-T-C-A-----G-G-G--G-TG--A-AA-TC--C-C-AG-A-G-----CT-C-AA-----C-T-C-T-G-G-A--A-C---T-G--C-C---T--T-----T--GA-T-A--C-----T--G-G-GT--G-T-C---T-T-G-A-G-T--G---T-GG----AA-G-A-----G-G-T-C---AG-T-----GG--A--ATT---G-  
C-G-A-GT--GT-A-G-AG-GT--G---A--A-A---TT-C-GT-AG--AT-A-TT--C-G--C-A-G-G-A-AC-A-CC---AG--T--G--GC-GAA-G--G-C-G-----G--C-T-G-A---CTG--G--TC-C-A-----C-A---A-C-T--GA--CG-C-T-G--A-GG--T-G-CG-A--AA-G-C---G-TG--GG-  
G--AG-C-A-AA-----CA--GG Bacteria(100);Proteobacteria(100);Alphaproteobacteria(100);Rhizobiales(100);unclassified(100);unclassified(100);unclassified(100);unclassified(100);unclassified(100);

Otu0278 0 0 0 0 0 0 0 0 0 0 0 0 0 0 0 0 7 1 0 0 0 0 0 0 0 0 0 0  
0 0 0 0 0 0 0 0 0 0 0 0 0 0 0 0 0 2 0 0 0 0 0 0 0 0 0 0  
0 0 0 0 0 0 1 0 0 0 0 0 0 0 0 0 0 0 0 0 0 0 0 0 0 0 0 0  
0 0 0 0 1 0 0 0 0 0 0 0 0 0 0 1 0 0 0 0 0 0 0 0 0 0 0 0  
M02255\_76\_000000000-ADUNE\_1\_1101\_24070\_4723 C---TG---TG-CC-AGC-----AGC-C-G-----C--G--G---T--AA-TACAG-AG-----GG-T--G-C--AA-GC-----GT--T----AA-TC-G--GA-----A-TT-A-C-T-G-----G--T-TT-G-T-T-----AA--  
---G-T-T-G-----A-A-T--G--TG--A-AA-TC--C-C-CG-G-G-----CT-C-AA-----C-C-T-G-G-G-A--A-C---T-G--C-A---T--C-----C-AA-A-A--C-----T--G-G--CA--A-G-C---T-A-G-A-G-T--A---T-GG----TA-G-A-----G-G-G-T---AG-T-----GG--A--ATT---T-C-C-T-  
GT--GT-A-G-CG-GT--G---A--A-A---TG-C-GT-AG--AT-A-TA--G-G--A-A-G-G-A-AC-A-CC---AG--T--G--GC-GAA-G--G-C-G-----A--C-T-A-C---CTG--G--AC-T-G-----A-T---A-C-T--GA--CA-C-T-G--A-GG--T-G-CG-A--AA-G-C---G-TG--GG-G--AG-  
C-A-AA-----CA--GG Bacteria(100);Proteobacteria(100);Gammaproteobacteria(100);Pseudomonadales(100);Pseudomonadaceae(100);Pseudomonas(54);unclassified(54);unclassified(54);unclassified(54);

Otu0279 0 0 81 0 0 0 0 0 0 0 0 0 0 0 0 0 0 0 0 0 0 0 0 0 0 0 0 0 0  
0 0 0 0 0 0 0 0 0 0 0 0 0 0 0 0 0 0 0 0 114 0 0 0 0 0 0 0  
0 25 0 0 0 0 0 0 0 0 0 0 0 0 0 0 0 0 0 0 0 0 0 0 0 0 0 0  
0 0 0 0 0 0 0 0 0 0 0 0 0 0 0 0 0 0 0 0 28 22 0 0 0 0  
M02255\_77\_000000000-ADUT3\_1\_1105\_16266\_18366 T---AC---GT-AT-GGA-----GCA-A-G-----C--G--T---T--AT-C-CGG-AT-----TT-A--C-T--GG-GT-----GT--A----AA-GG-GA-GC-----G-TA-G-G-C-G-----G--C-AG-A-G-C-----  
-----AA---G-T-C-T-----G-A-T--G--TG--A-AA-GC--C-C-GG-G-G-----CT-C-AA-----C-C-C-C-G-G-T--A-G---T-G--C-A---T--T-----G--GA-A-A--C-----T--G-T--TC--G-G-C---T-C-G-A-G-T--G---T-CG----GA-G-G-----G-G-T-A---AG-C-----GG--A--ATT---  
C-C-T-G-GT--GT-A-G-CG-GT--G---A--A-A---TG-C-GT-AG--AT-A-TC--A-G--G-A-A-G-A-AC-A-CC---GG--A--G--GC-GAA-G--G-C-G-----G--C-T-T-A---CTG--G--AC-G-A-----T-T---A-C-T--GA--CG-C-T-G--A-GG--C-T-CG-A--AA-G-C---G-TG--  
GG-G--AG-C-G-AA-----CA--GG Bacteria(100);Firmicutes(100);Clostridia(100);Clostridiales(100);Lachnospiraceae(100);Shuttleworthia(68);unclassified(68);unclassified(68);unclassified(68);



|                                                                                                                                                                                                                             |    |    |   |   |    |    |   |    |   |    |    |   |    |    |    |   |    |   |    |    |   |   |     |    |   |    |     |   |
|-----------------------------------------------------------------------------------------------------------------------------------------------------------------------------------------------------------------------------|----|----|---|---|----|----|---|----|---|----|----|---|----|----|----|---|----|---|----|----|---|---|-----|----|---|----|-----|---|
| Otu0280                                                                                                                                                                                                                     | 0  | 0  | 0 | 0 | 0  | 0  | 0 | 0  | 0 | 0  | 0  | 0 | 0  | 0  | 0  | 0 | 0  | 0 | 0  | 0  | 0 | 0 | 0   | 0  | 0 | 0  | 0   |   |
|                                                                                                                                                                                                                             | 0  | 0  | 0 | 0 | 0  | 0  | 0 | 0  | 0 | 0  | 0  | 0 | 0  | 0  | 56 | 0 | 0  | 0 | 64 | 0  | 0 | 0 | 0   | 0  | 0 | 0  | 130 |   |
|                                                                                                                                                                                                                             | 0  | 0  | 2 | 0 | 0  | 0  | 0 | 0  | 0 | 0  | 0  | 0 | 0  | 86 | 51 | 0 | 0  | 0 | 5  | 41 | 0 | 0 | 112 | 0  | 0 | 0  | 0   |   |
|                                                                                                                                                                                                                             | 0  | 0  | 0 | 0 | 19 | 0  | 0 | 0  | 0 | 0  | 0  | 0 | 0  | 0  | 10 | 0 | 0  | 0 | 0  | 0  | 0 | 0 | 1   | 0  | 0 | 0  |     |   |
| M02255_77_000000000-ADUT3_1_1101_29238_16133                                                                                                                                                                                |    |    |   |   |    |    |   |    |   |    |    |   |    |    |    |   |    |   |    |    |   |   |     |    |   |    |     |   |
| T---AC---GT-AG-GGT-----GCA-A-G-----C-A-T---T-AT-C-CGG-AG-----TG-A-C-T--GG-GC-----GT-A-----AA-GA-GTTGC-----G-TA-G-G-C-G-----G-T-TT-A-A-T-----                                                                                |    |    |   |   |    |    |   |    |   |    |    |   |    |    |    |   |    |   |    |    |   |   |     |    |   |    |     |   |
| -----AA---G-T-G-A-----A-T-A-G--TG--A-AA-CC--T-G-GT-G-G-----CT-C-AA-----C-C-A-T-ACA-G-A-C---T-A-T-T---A-T-----T-CA-A-A---C-----T-G-T-TA--A-A-C---T-C-G-A-G-A--A--T-GG-----TA-G-A-----G-G-T-A--AC-T-----GG--A--ATT---T-       |    |    |   |   |    |    |   |    |   |    |    |   |    |    |    |   |    |   |    |    |   |   |     |    |   |    |     |   |
| C-T-T-GT--GT-A-G-GA-GT--G---A-A-A---TC-C-GT-AG--AT-A-TA--A-G--A-A-G-G-A-AC-A-CC---AA-T-G--GC-GTA-G--G-C-A-----G--G-T-T-A---CTG--G--GC-C-A-----T-T---T-C-T--GA--CG-C-T-A--A-GG--C-A-CG-A--AA-G-C---G-TG--GG-G--              |    |    |   |   |    |    |   |    |   |    |    |   |    |    |    |   |    |   |    |    |   |   |     |    |   |    |     |   |
| AG-C-G-AA-----CC--GG                                                                                                                                                                                                        |    |    |   |   |    |    |   |    |   |    |    |   |    |    |    |   |    |   |    |    |   |   |     |    |   |    |     |   |
| Bacteria(100);Candidate_division_TM7(100);unclassified(100);unclassified(100);unclassified(100);unclassified(100);unclassified(100);unclassified(100);unclassified(100);                                                    |    |    |   |   |    |    |   |    |   |    |    |   |    |    |    |   |    |   |    |    |   |   |     |    |   |    |     |   |
| Otu0281                                                                                                                                                                                                                     | 0  | 0  | 0 | 0 | 0  | 0  | 0 | 0  | 0 | 0  | 0  | 0 | 0  | 0  | 0  | 0 | 0  | 0 | 0  | 0  | 0 | 0 | 0   | 3  | 0 | 0  | 0   |   |
|                                                                                                                                                                                                                             | 0  | 0  | 0 | 0 | 0  | 31 | 0 | 0  | 0 | 0  | 0  | 0 | 0  | 0  | 0  | 0 | 0  | 0 | 0  | 0  | 0 | 0 | 26  | 0  | 0 | 0  | 0   |   |
|                                                                                                                                                                                                                             | 0  | 0  | 0 | 0 | 0  | 0  | 0 | 0  | 0 | 0  | 0  | 0 | 0  | 0  | 0  | 0 | 20 | 0 | 0  | 1  | 0 | 0 | 0   | 0  | 0 | 29 | 0   |   |
|                                                                                                                                                                                                                             | 0  | 0  | 0 | 0 | 0  | 0  | 0 | 0  | 0 | 0  | 0  | 0 | 0  | 0  | 0  | 0 | 24 | 0 | 0  | 0  | 0 | 0 | 0   | 0  | 0 | 0  |     |   |
| M02255_77_000000000-ADUT3_1_1102_12123_12775                                                                                                                                                                                |    |    |   |   |    |    |   |    |   |    |    |   |    |    |    |   |    |   |    |    |   |   |     |    |   |    |     |   |
| G---AC---GA-AG-GGG-----GCT-A-G-----C-G-T---T-GT-T-CGG-AA-----TT-A-C-T--GG-GC-----GT-A-----AA-GC-GA-GT-----G-TA-G-G-T-G-----G-T-TA-T-C-C-----                                                                                |    |    |   |   |    |    |   |    |   |    |    |   |    |    |    |   |    |   |    |    |   |   |     |    |   |    |     |   |
| -----AA---G-T-T-G-----G-A-T-G--TG--A-AA-GC--C-T-TG-A-G-----CT-C-AA-----C-T-C-A-A-G-A-A-A---T-G--C-A---T-T-----C-AG-G-A---C-----T-G-G-AT--G-A-C---T-A-G-A-G-G-A--C-CG-----GA-G-A-----G-G-A-T--AG-T-----GG--A--ATT---         |    |    |   |   |    |    |   |    |   |    |    |   |    |    |    |   |    |   |    |    |   |   |     |    |   |    |     |   |
| C-C-C-A-GT--GT-A-G-TG-GT--G---A-A-A---TA-C-GT-AG--AG-A-TT--G-G--G-A-A-G-A-AC-A-CC---AG--T-G--GC-GAA-G--G-C-G-----G--C-T-A-T---CTG--G--AC-G-G-----T-T---T-C-T--GA--CA-C-T-A--A-GA--C-T-CG-A--AA-G-C---G-TG--GG-              |    |    |   |   |    |    |   |    |   |    |    |   |    |    |    |   |    |   |    |    |   |   |     |    |   |    |     |   |
| G--AG-C-A-AA-----CA--GG                                                                                                                                                                                                     |    |    |   |   |    |    |   |    |   |    |    |   |    |    |    |   |    |   |    |    |   |   |     |    |   |    |     |   |
| Bacteria(100);Proteobacteria(100);Alphaproteobacteria(100);Rhodospirillales(100);wr0007(100);unclassified(100);unclassified(100);unclassified(100);unclassified(100);                                                       |    |    |   |   |    |    |   |    |   |    |    |   |    |    |    |   |    |   |    |    |   |   |     |    |   |    |     |   |
| Otu0282                                                                                                                                                                                                                     | 0  | 0  | 0 | 0 | 0  | 0  | 0 | 40 | 0 | 0  | 0  | 0 | 0  | 0  | 0  | 0 | 0  | 0 | 0  | 0  | 0 | 0 | 20  | 0  | 0 | 0  | 0   |   |
|                                                                                                                                                                                                                             | 0  | 0  | 0 | 0 | 0  | 0  | 0 | 0  | 0 | 0  | 0  | 0 | 0  | 26 | 0  | 0 | 0  | 0 | 0  | 0  | 0 | 0 | 0   | 0  | 0 | 0  | 0   |   |
|                                                                                                                                                                                                                             | 0  | 50 | 0 | 0 | 0  | 0  | 0 | 0  | 0 | 0  | 0  | 0 | 0  | 0  | 0  | 0 | 0  | 0 | 0  | 0  | 0 | 7 | 0   | 0  | 0 | 0  | 0   |   |
|                                                                                                                                                                                                                             | 0  | 0  | 0 | 0 | 0  | 22 | 0 | 0  | 0 | 0  | 0  | 0 | 0  | 0  | 0  | 0 | 0  | 0 | 0  | 0  | 0 | 0 | 0   | 0  | 0 | 0  |     |   |
| M02255_77_000000000-ADUT3_1_1108_12649_13205                                                                                                                                                                                |    |    |   |   |    |    |   |    |   |    |    |   |    |    |    |   |    |   |    |    |   |   |     |    |   |    |     |   |
| T---AC---GA-AG-GGG-----GCT-A-G-----C-G-T---T-GT-T-CGG-AA-----TT-A-C-T--GG-GC-----GT-A-----AA-GC-GC-AC-----G-TA-G-G-C-G-----G--A-CA-T-T-T-----                                                                               |    |    |   |   |    |    |   |    |   |    |    |   |    |    |    |   |    |   |    |    |   |   |     |    |   |    |     |   |
| -----AA---G-T-C-A-----G-G-G--G--TG--A-AA-TC--C-C-GG-G-G-----CT-C-AA-----C-C-T-C-G-G-A-A-C---T-G--C-C---T-T-----T-GA-T-A---C-----T-G-G-GT--G-T-C---T-T-G-A-G-T--A--T-GG-----AA-G-A-----G-G-T-A--AG-T-----GG--A--ATT---G-     |    |    |   |   |    |    |   |    |   |    |    |   |    |    |    |   |    |   |    |    |   |   |     |    |   |    |     |   |
| C-G-A-GT--GT-A-G-AG-GT--G---A-A-A---TT-C-GT-AG--AT-A-TT--C-G--C-A-G-G-A-AC-A-CC---AG--T-G--GC-GAA-G--G-C-G-----G--C-T-T-A---CTG--G--TC-C-A-----T-T---A-C-T--GA--CG-C-T-G--A-GG--T-G-CG-A--AA-G-C---G-TG--GG-G-              |    |    |   |   |    |    |   |    |   |    |    |   |    |    |    |   |    |   |    |    |   |   |     |    |   |    |     |   |
| -AG-C-A-AA-----CA--GG                                                                                                                                                                                                       |    |    |   |   |    |    |   |    |   |    |    |   |    |    |    |   |    |   |    |    |   |   |     |    |   |    |     |   |
| Bacteria(100);Proteobacteria(100);Alphaproteobacteria(100);Rhizobiales(100);unclassified(59);unclassified(59);unclassified(59);unclassified(59);unclassified(59);                                                           |    |    |   |   |    |    |   |    |   |    |    |   |    |    |    |   |    |   |    |    |   |   |     |    |   |    |     |   |
| Otu0283                                                                                                                                                                                                                     | 0  | 0  | 0 | 0 | 0  | 0  | 0 | 0  | 0 | 0  | 0  | 0 | 0  | 0  | 0  | 0 | 2  | 0 | 0  | 0  | 0 | 0 | 0   | 0  | 0 | 4  | 0   | 0 |
|                                                                                                                                                                                                                             | 0  | 0  | 1 | 0 | 0  | 0  | 0 | 0  | 0 | 21 | 34 | 0 | 24 | 0  | 0  | 0 | 0  | 1 | 84 | 0  | 0 | 0 | 0   | 13 | 0 | 25 | 16  |   |
|                                                                                                                                                                                                                             | 28 | 0  | 0 | 0 | 0  | 0  | 0 | 0  | 0 | 0  | 0  | 8 | 0  | 0  | 0  | 0 | 0  | 0 | 0  | 4  | 0 | 0 | 0   | 0  | 0 | 0  | 0   |   |
|                                                                                                                                                                                                                             | 0  | 0  | 0 | 0 | 50 | 0  | 0 | 0  | 0 | 0  | 0  | 0 | 0  | 0  | 0  | 0 | 0  | 0 | 0  | 0  | 0 | 0 | 0   | 0  | 0 | 0  |     |   |
| M02255_77_000000000-ADUT3_1_1118_20844_16689                                                                                                                                                                                |    |    |   |   |    |    |   |    |   |    |    |   |    |    |    |   |    |   |    |    |   |   |     |    |   |    |     |   |
| T---AC---GT-AG-GGT-----GCG-A-G-----C-G-T---T-GT-T-CGG-AA-----TT-A-T-T--GG-GC-----GT-A-----AA-GA-GC-TT-----G-TA-G-G-C-G-----G--T-TT-G-T-C-----                                                                               |    |    |   |   |    |    |   |    |   |    |    |   |    |    |    |   |    |   |    |    |   |   |     |    |   |    |     |   |
| -----GC---G-T-C-T-----G-C-C--G--TG--A-AA-AC--T-C-AG-G-G-----CT-T-AA-----C-T-C-T-G-G-G--C-G---T-G--C-G---G-T-----G--GG-T-A---C-----G--G-G--CA--G-G-C---T-A-G-A-G-T--G---T-GG-----TA-G-G-----G-G-A-G---AC-T-----GG--A--ATT--- |    |    |   |   |    |    |   |    |   |    |    |   |    |    |    |   |    |   |    |    |   |   |     |    |   |    |     |   |
| C-C-T-G-GT--GT-A-G-CG-GT--G---A-A-A---TG-C-GC-AG--AT-A-TC--A-G--G-A-G-G-A-AC-A-CC---GA--T-G--GC-GAA-G--G-C-A-----G--G-T-C-T---CTG--G--GC-C-A-----T-A---A-C-T--GA--CG-C-T-G--A-GA--A-G-CG-A--AA-G-C---A-TG--                 |    |    |   |   |    |    |   |    |   |    |    |   |    |    |    |   |    |   |    |    |   |   |     |    |   |    |     |   |
| GG-G--AG-C-G-AA-----CA--GG                                                                                                                                                                                                  |    |    |   |   |    |    |   |    |   |    |    |   |    |    |    |   |    |   |    |    |   |   |     |    |   |    |     |   |
| Bacteria(100);Actinobacteria(100);Actinobacteria(100);Actinobacteridae(100);Actinomycetales(100);Micrococcineae(100);Dermatophilaceae(82);unclassified(82);unclassified(82);                                                |    |    |   |   |    |    |   |    |   |    |    |   |    |    |    |   |    |   |    |    |   |   |     |    |   |    |     |   |
| Otu0284                                                                                                                                                                                                                     | 0  | 0  | 0 | 0 | 0  | 2  | 0 | 0  | 0 | 0  | 0  | 2 | 0  | 1  | 1  | 0 | 0  | 0 | 0  | 0  | 0 | 2 | 0   | 0  | 0 | 0  | 1   |   |
|                                                                                                                                                                                                                             | 0  | 0  | 0 | 0 | 0  | 0  | 0 | 0  | 0 | 0  | 0  | 0 | 0  | 0  | 0  | 1 | 3  | 0 | 0  | 0  | 0 | 0 | 0   | 0  | 0 | 0  | 0   |   |
|                                                                                                                                                                                                                             | 0  | 0  | 0 | 0 | 0  | 0  | 0 | 0  | 0 | 0  | 0  | 0 | 0  | 0  | 0  | 0 | 0  | 0 | 0  | 3  | 0 | 4 | 0   | 0  | 0 | 0  | 0   |   |
|                                                                                                                                                                                                                             | 0  | 0  | 0 | 0 | 0  | 0  | 0 | 0  | 0 | 0  | 0  | 0 | 0  | 1  | 0  | 0 | 0  | 0 | 0  | 0  | 0 | 0 | 1   | 0  | 0 | 0  |     |   |
| M02255_76_000000000-ADUNE_1_2101_26731_17477                                                                                                                                                                                |    |    |   |   |    |    |   |    |   |    |    |   |    |    |    |   |    |   |    |    |   |   |     |    |   |    |     |   |
| T---A---AG-CA-CCG-----GCT-A-A-----C-----T---C--TG-T-GCC-AG-----CA-G--C-C--GC-GG-----TA-A-----TA-CA-GA-GG-----G-T--G-C-A-A-----G--C--G-T---T-----                                                                            |    |    |   |   |    |    |   |    |   |    |    |   |    |    |    |   |    |   |    |    |   |   |     |    |   |    |     |   |
| -AA---G-T-C-G-----G-A-A--G--TG--A-AA-TC--C-C-CG-G-G-----CT-T-AA-----C-C-T-G-G-G-A-A-C---T-G--C-A---T-C-----T-GA-A-A---C-----T-G-T--AG--A-G-C---T-A-G-A-G-T--A--T-GT-----GA-G-A-----G-G-A-A---GG-T-----AG--A--ATT---C-C-     |    |    |   |   |    |    |   |    |   |    |    |   |    |    |    |   |    |   |    |    |   |   |     |    |   |    |     |   |
| A-G-GT--GT-A-G-CG-GT--G---A-A-A---TG-C-GT-AG--AG-A-TC--T-G--G-A-G-G-A-AT-A-CC---GA--T-G--GC-GAA-G--G-C-A-----G--C-C-T-T---CTG--G--CA-T-A-----A-T---A-C-T--GA--CA-C-T-G--A-GG--C-T-CG-A--AA-G-C---G-TG--GG-T--               |    |    |   |   |    |    |   |    |   |    |    |   |    |    |    |   |    |   |    |    |   |   |     |    |   |    |     |   |
| AG-C-A-AA-----CA--GG                                                                                                                                                                                                        |    |    |   |   |    |    |   |    |   |    |    |   |    |    |    |   |    |   |    |    |   |   |     |    |   |    |     |   |
| Bacteria(100);Proteobacteria(100);Gammaproteobacteria(100);Pseudomonadales(73);Moraxellaceae(73);unclassified(73);unclassified(73);unclassified(73);unclassified(73);                                                       |    |    |   |   |    |    |   |    |   |    |    |   |    |    |    |   |    |   |    |    |   |   |     |    |   |    |     |   |



|                                                                                                                                                                                                                             |     |     |   |    |     |    |     |   |     |    |    |   |    |     |     |   |    |    |    |   |    |   |    |     |    |    |     |
|-----------------------------------------------------------------------------------------------------------------------------------------------------------------------------------------------------------------------------|-----|-----|---|----|-----|----|-----|---|-----|----|----|---|----|-----|-----|---|----|----|----|---|----|---|----|-----|----|----|-----|
| Otu0285                                                                                                                                                                                                                     | 0   | 109 | 0 | 0  | 0   | 0  | 24  | 0 | 173 | 0  | 0  | 0 | 0  | 0   | 0   | 0 | 0  | 0  | 0  | 0 | 0  | 0 | 0  | 0   | 0  | 0  | 0   |
|                                                                                                                                                                                                                             | 0   | 0   | 0 | 46 | 0   | 0  | 0   | 0 | 0   | 0  | 26 | 0 | 0  | 0   | 0   | 0 | 0  | 0  | 0  | 0 | 0  | 0 | 0  | 0   | 0  | 0  | 0   |
|                                                                                                                                                                                                                             | 0   | 0   | 0 | 0  | 0   | 0  | 0   | 0 | 0   | 0  | 5  | 0 | 0  | 0   | 0   | 0 | 0  | 0  | 0  | 0 | 1  | 0 | 0  | 466 | 0  | 0  | 23  |
|                                                                                                                                                                                                                             | 0   | 0   | 0 | 0  | 0   | 0  | 0   | 0 | 56  | 4  | 71 | 0 | 0  | 0   | 0   | 0 | 0  | 0  | 0  | 0 | 0  | 0 | 43 | 0   | 10 |    |     |
| M02255_77_000000000-ADUT3_1_1102_21530_19483 T---AC---GT-AG-GGG-----GCA-A-G-----C--G--T---T--AT-C-CGG-AT-----TT-A--C-T-GG-GT-----GT--A----AA-GG-GA-GC-----G-CA-G-A-C-G-----G--C-AC-T-G-C-----                               |     |     |   |    |     |    |     |   |     |    |    |   |    |     |     |   |    |    |    |   |    |   |    |     |    |    |     |
| -----AA---G-T-C-T-----G-A-A--G--TG--A-AA-GC--C-C-GG-G-G-----CT-C-AA-----C-C-C-C-G-G-G--A-C---T-G--C-T---T--T-----G--GA-A-A--C-----T-G-T--AG--A-G-C---T-A-G-A-G-T--G---C-TG----GA-G-A-----G-G-C-A--AG-C-----GG--A--ATT----   |     |     |   |    |     |    |     |   |     |    |    |   |    |     |     |   |    |    |    |   |    |   |    |     |    |    |     |
| C-C-T-A-GT--GT-A-G-CG-GT--G---A--A-A--TG-C-GT-AG--AT-A-TT--A-G--G-A-A-G-A-AC-A-CC---AG--T--G--GC-GAA-G--G-C-G-----G--C-T-T-G---CTG--G--AC-A-G-----T-A--A-C-T--GA--CG-T-T-C--A-GG--C-T-CG-A--AA-G-C---G-TG--GG-G--           |     |     |   |    |     |    |     |   |     |    |    |   |    |     |     |   |    |    |    |   |    |   |    |     |    |    |     |
| G--AG-C-A-AA-----CA--GG Bacteria(100);Firmicutes(100);Clostridia(100);Clostridiales(100);Lachnospiraceae(100);unclassified(100);unclassified(100);unclassified(100);unclassified(100);                                      |     |     |   |    |     |    |     |   |     |    |    |   |    |     |     |   |    |    |    |   |    |   |    |     |    |    |     |
| Otu0286                                                                                                                                                                                                                     | 0   | 0   | 0 | 0  | 0   | 42 | 0   | 0 | 0   | 0  | 0  | 0 | 0  | 0   | 0   | 0 | 0  | 0  | 0  | 0 | 0  | 0 | 0  | 0   | 0  | 0  | 0   |
|                                                                                                                                                                                                                             | 0   | 0   | 0 | 0  | 0   | 0  | 0   | 0 | 0   | 0  | 76 | 0 | 0  | 0   | 0   | 0 | 0  | 0  | 0  | 0 | 0  | 0 | 0  | 6   | 0  | 0  | 0   |
|                                                                                                                                                                                                                             | 0   | 0   | 0 | 0  | 0   | 0  | 0   | 0 | 0   | 0  | 0  | 0 | 0  | 0   | 0   | 0 | 0  | 0  | 0  | 0 | 18 | 0 | 0  | 0   | 0  | 0  | 0   |
|                                                                                                                                                                                                                             | 0   | 0   | 0 | 0  | 0   | 0  | 0   | 0 | 0   | 1  | 0  | 0 | 27 | 0   | 0   | 0 | 0  | 0  | 0  | 0 | 0  | 5 | 0  | 0   | 0  | 0  |     |
| M02255_77_000000000-ADUT3_1_1107_14616_14346 T---AC---GT-AT-GGG-----GCA-A-G-----C--G--T---T--GT-C-CGG-AA-----TT-A--T-T-GG-GC-----GT--A----AA-GG-GT-AC-----G-TA-G-G-C-G-----G--T-TT-A-A-T-----                               |     |     |   |    |     |    |     |   |     |    |    |   |    |     |     |   |    |    |    |   |    |   |    |     |    |    |     |
| -----AA---G-T-C-C-----T-A-A--T--TA--A-AA-GG--C-T-AT-G-G-----CT-C-AA-----C-C-A-T-A-G-T--A---T-G--G-T---T--A-----G--GA-A-A--C-----T-G-T--TG--A-A-C---T-T-G-A-G-T--A--G-AT----GA-G-G-----G-G-A-A--AG-T-----GG--A--ATT---C-C-   |     |     |   |    |     |    |     |   |     |    |    |   |    |     |     |   |    |    |    |   |    |   |    |     |    |    |     |
| A-T-GT--GT-A-G-CG-GT--G---A--A-A--TG-C-GT-AG--AT-A-TA--T-G--G-A-G-G-A-AC-A-CC---AA--T--G--GC-GAA-G--G-C-A-----A--C-T-T-T---CTG--G--AA-T-C-----A-A--A-C-T--GA--CG-C-T-G--A-GG--T-A-CG-A--AG-G-C---G-TG--GG-G--               |     |     |   |    |     |    |     |   |     |    |    |   |    |     |     |   |    |    |    |   |    |   |    |     |    |    |     |
| AG-C-A-AA-----CA--GG Bacteria(100);Firmicutes(100);Clostridia(100);Clostridiales(100);Family_XI_Incertae_Sedis(100);Helcococcus(100);unclassified(100);unclassified(100);unclassified(100);                                 |     |     |   |    |     |    |     |   |     |    |    |   |    |     |     |   |    |    |    |   |    |   |    |     |    |    |     |
| Otu0287                                                                                                                                                                                                                     | 123 | 0   | 0 | 99 | 0   | 0  | 0   | 0 | 0   | 0  | 0  | 0 | 0  | 0   | 0   | 0 | 0  | 0  | 0  | 0 | 0  | 0 | 0  | 10  | 0  | 0  | 0   |
|                                                                                                                                                                                                                             | 0   | 0   | 0 | 0  | 0   | 0  | 0   | 0 | 0   | 0  | 0  | 1 | 0  | 0   | 0   | 0 | 0  | 0  | 0  | 0 | 0  | 0 | 12 | 0   | 0  | 0  | 0   |
|                                                                                                                                                                                                                             | 0   | 0   | 0 | 0  | 0   | 0  | 0   | 0 | 0   | 0  | 0  | 0 | 0  | 0   | 0   | 0 | 0  | 22 | 0  | 0 | 0  | 0 | 0  | 0   | 0  | 51 | 32  |
|                                                                                                                                                                                                                             | 0   | 0   | 0 | 23 | 0   | 0  | 0   | 0 | 0   | 0  | 0  | 0 | 0  | 0   | 10  | 0 | 0  | 0  | 0  | 0 | 44 | 0 | 0  | 0   | 0  | 18 |     |
| M02255_77_000000000-ADUT3_1_1106_22050_14795 T---AC---GG-AG-GGG-----GCT-A-G-----C--G--T---T--GT-T-CGG-AA-----TT-A--C-T-GG-GC-----GT--A----AA-GC-GT-AC-----G-TA-G-G-C-G-----G--C-TT-T-G-T-----                               |     |     |   |    |     |    |     |   |     |    |    |   |    |     |     |   |    |    |    |   |    |   |    |     |    |    |     |
| -----AA---G-T-T-A-----G-A-G--G--TG--A-AA-GC--C-C-AG-A-G-----CT-C-AA-----C-T-C-T-G-G-A--A-T---T-G--C-C---T--T-----T--AA-G-A--C-----T--G-C--AT--C-G-C---T-T-G-A-A-T--C---G-TG----GA-G-A-----G-G-T-T--AG-T-----GG--A--ATT---C- |     |     |   |    |     |    |     |   |     |    |    |   |    |     |     |   |    |    |    |   |    |   |    |     |    |    |     |
| C-G-A-GT--GT-A-G-AG-GT--G---A--A-A--TT-C-GT-AG--AT-A-TT--C-G--G-A-A-G-A-AC-A-CC---AG--T--G--GC-GAA-G--G-C-G-----A--C-T-A-A---CTG--G--AC-A-C-----G-T--A-T-T--GA--CG-C-T-G--A-GG--T-A-CG-A--AA-G-C---G-TG--GG-G--             |     |     |   |    |     |    |     |   |     |    |    |   |    |     |     |   |    |    |    |   |    |   |    |     |    |    |     |
| -AG-C-A-AA-----CA--GG Bacteria(100);Proteobacteria(100);Alphaproteobacteria(100);Sphingomonadales(100);Sphingomonadaceae(100);Sphingomonas(100);unclassified(100);unclassified(100);unclassified(100);                      |     |     |   |    |     |    |     |   |     |    |    |   |    |     |     |   |    |    |    |   |    |   |    |     |    |    |     |
| Otu0288                                                                                                                                                                                                                     | 324 | 0   | 0 | 0  | 0   | 0  | 145 | 4 | 0   | 65 | 0  | 0 | 0  | 0   | 0   | 0 | 0  | 0  | 0  | 0 | 0  | 0 | 0  | 0   | 0  | 0  | 8   |
|                                                                                                                                                                                                                             | 0   | 1   | 0 | 0  | 162 | 0  | 0   | 0 | 0   | 17 | 0  | 0 | 0  | 63  | 31  | 1 | 92 | 0  | 54 | 1 | 0  | 0 | 0  | 0   | 0  | 0  | 0   |
|                                                                                                                                                                                                                             | 0   | 62  | 0 | 0  | 0   | 0  | 9   | 0 | 1   | 0  | 0  | 0 | 0  | 303 | 381 | 0 | 0  | 0  | 0  | 0 | 7  | 0 | 97 | 0   | 0  | 9  | 157 |
|                                                                                                                                                                                                                             | 0   | 68  | 0 | 0  | 0   | 0  | 8   | 0 | 0   | 0  | 0  | 0 | 38 |     |     |   |    |    |    |   |    |   |    |     |    |    |     |



|                                                                                                                                                                                                                                                                                                                                                                                                                                                                                                                                                                                                                                 |    |    |   |    |     |    |     |    |     |    |     |    |   |    |    |    |     |     |     |     |    |    |    |    |   |   |   |   |
|---------------------------------------------------------------------------------------------------------------------------------------------------------------------------------------------------------------------------------------------------------------------------------------------------------------------------------------------------------------------------------------------------------------------------------------------------------------------------------------------------------------------------------------------------------------------------------------------------------------------------------|----|----|---|----|-----|----|-----|----|-----|----|-----|----|---|----|----|----|-----|-----|-----|-----|----|----|----|----|---|---|---|---|
| Otu0290                                                                                                                                                                                                                                                                                                                                                                                                                                                                                                                                                                                                                         | 0  | 0  | 0 | 0  | 0   | 1  | 0   | 0  | 0   | 0  | 0   | 4  | 0 | 0  | 1  | 0  | 0   | 1   | 0   | 0   | 0  | 0  | 0  | 1  | 0 | 6 | 0 | 1 |
|                                                                                                                                                                                                                                                                                                                                                                                                                                                                                                                                                                                                                                 | 4  | 0  | 0 | 0  | 0   | 0  | 0   | 0  | 0   | 0  | 0   | 0  | 0 | 0  | 0  | 0  | 0   | 0   | 0   | 0   | 0  | 0  | 0  | 0  | 0 | 0 | 0 |   |
|                                                                                                                                                                                                                                                                                                                                                                                                                                                                                                                                                                                                                                 | 0  | 0  | 0 | 0  | 0   | 0  | 0   | 0  | 0   | 0  | 0   | 0  | 0 | 0  | 0  | 0  | 0   | 0   | 0   | 0   | 3  | 18 | 0  | 0  | 0 | 0 | 0 |   |
|                                                                                                                                                                                                                                                                                                                                                                                                                                                                                                                                                                                                                                 | 9  | 0  | 0 | 0  | 0   | 1  | 0   | 0  | 0   | 0  | 0   | 0  | 0 | 0  | 0  | 0  | 0   | 0   | 0   | 0   | 0  | 0  | 1  | 0  | 0 | 0 | 0 |   |
| M02255_76_000000000-ADUNE_1_1108_13257_9642 T---AA---CT-AC-GT-----GCC-A-G---C-A-G---C-CG-C-GGT-AA-----TA-C-G-T-AG-AT-----GG-C---AA-GC-G-TT-----G-TC-C-G--G-----A-T-TC-T-T-T-----AA-----G-T-C-T-----G-A-T--G--TG--A-AA-GA--C-C-CC-A-G---CT-C-AA-----C-T-G-G-G-G-A-A-----G-GT-C-A--T-T-----G--GA-A-A--C-----T-G-G--AG--A-A-C---T-T-G-A-G-T-G---C-AG---AA-G-A-----G-G-A-G--AG-T----GG--A--ATT---C-C-A-T-GT--GT-A-G-CG-GT--G---A-A-A---TG-C-GT-AG--AT-A-TA--T-G--G-A-G-G-A-AC-A-CC---AG--T-G--GC-GAA-G-G-C-G-----A-C-T-C-T---CTG--G--TC-T-G-----T-A--A-C-T-GA--CG-C-T-G--A-GG--C-T-CG-A-AA-G-C--G-TG--GG-G--AG-C-A-AA-----CA--GG    |    |    |   |    |     |    |     |    |     |    |     |    |   |    |    |    |     |     |     |     |    |    |    |    |   |   |   |   |
| Bacteria(100);Firmicutes(100);Bacilli(100);Lactobacillales(100);Carnobacteriaceae(100);Carnobacterium(71);unclassified(71);unclassified(71);unclassified(71);                                                                                                                                                                                                                                                                                                                                                                                                                                                                   |    |    |   |    |     |    |     |    |     |    |     |    |   |    |    |    |     |     |     |     |    |    |    |    |   |   |   |   |
| Otu0291                                                                                                                                                                                                                                                                                                                                                                                                                                                                                                                                                                                                                         | 0  | 0  | 0 | 0  | 0   | 0  | 87  | 71 | 201 | 0  | 0   | 0  | 0 | 0  | 0  | 0  | 0   | 0   | 0   | 2   | 16 | 0  | 0  | 0  | 0 | 0 | 0 |   |
|                                                                                                                                                                                                                                                                                                                                                                                                                                                                                                                                                                                                                                 | 0  | 3  | 0 | 0  | 0   | 0  | 0   | 0  | 36  | 2  | 141 | 0  | 0 | 0  | 0  | 0  | 0   | 0   | 0   | 0   | 0  | 0  | 0  | 0  | 0 | 0 | 0 |   |
|                                                                                                                                                                                                                                                                                                                                                                                                                                                                                                                                                                                                                                 | 0  | 0  | 0 | 0  | 0   | 0  | 0   | 0  | 0   | 0  | 0   | 0  | 0 | 0  | 4  | 0  | 0   | 0   | 0   | 0   | 0  | 0  | 0  | 0  | 0 | 0 | 0 |   |
|                                                                                                                                                                                                                                                                                                                                                                                                                                                                                                                                                                                                                                 | 0  | 0  | 0 | 0  | 0   | 0  | 0   | 0  | 0   | 0  | 0   | 0  | 0 | 0  | 0  | 0  | 0   | 0   | 0   | 0   | 0  | 0  | 0  | 32 | 0 | 0 | 0 |   |
| M02255_77_000000000-ADUT3_1_1104_13440_15137 T---AC---GT-AG-GTG-----GCA-A-G---C-G--T--T-GT-C-CGG-AT-----TT-A-C-T-GG-GT-----GT-A---AA-GG-GC-GT-----G-CA-G-C-C-G-----G--G-TC-T-G-C-----AA---G-T-C-A-----G-A-T--G--TG--A-AA-TC--C-A-TG-G-G---CT-C-AA-----C-C-C-A-T-G-A-A-C---T-G--C-A--T-T-----T-GA-A-A--C-----T-G-T--AG--A-T-C---T-T-G-A-G-T-G---T-CG---GA-G-G-----G-G-C-A--AT-C---GG--A--ATT---C-C-T-A-GT--GT-A-G-CG-GT--G---A-A-A---TG-C-GT-AG--AT-A-TT--A-G--G-A-G-G-A-AC-A-CC---AG--T-G--GC-GAA-G-G-C-G-----G--A-T-T-G---CTG--G--AC-G-A-----T-A--A-C-T-GA--CG-G-T-G--A-GG--C-G-CG-A-AA-G-T--G-TG--GG-G--AG-C-A-AA-----CA--GG  |    |    |   |    |     |    |     |    |     |    |     |    |   |    |    |    |     |     |     |     |    |    |    |    |   |   |   |   |
| Bacteria(100);Firmicutes(100);Clostridia(100);Clostridiales(100);Ruminococcaceae(100);unclassified(100);unclassified(100);unclassified(100);unclassified(100);                                                                                                                                                                                                                                                                                                                                                                                                                                                                  |    |    |   |    |     |    |     |    |     |    |     |    |   |    |    |    |     |     |     |     |    |    |    |    |   |   |   |   |
| Otu0292                                                                                                                                                                                                                                                                                                                                                                                                                                                                                                                                                                                                                         | 0  | 0  | 0 | 0  | 0   | 0  | 0   | 0  | 0   | 0  | 0   | 0  | 0 | 0  | 0  | 0  | 0   | 0   | 0   | 0   | 0  | 0  | 0  | 0  | 0 | 0 | 0 |   |
|                                                                                                                                                                                                                                                                                                                                                                                                                                                                                                                                                                                                                                 | 0  | 0  | 0 | 0  | 0   | 0  | 0   | 0  | 0   | 0  | 0   | 0  | 0 | 0  | 11 | 0  | 0   | 0   | 0   | 0   | 0  | 0  | 0  | 0  | 0 | 0 | 0 |   |
|                                                                                                                                                                                                                                                                                                                                                                                                                                                                                                                                                                                                                                 | 25 | 65 | 7 | 29 | 62  | 24 | 143 | 21 | 10  | 16 | 65  | 27 | 7 | 4  | 0  | 0  | 130 | 0   | 314 | 266 | 92 | 0  | 0  | 0  | 0 | 0 | 0 |   |
|                                                                                                                                                                                                                                                                                                                                                                                                                                                                                                                                                                                                                                 | 0  | 0  | 0 | 0  | 0   | 0  | 0   | 0  | 0   | 0  | 0   | 0  | 0 | 0  | 0  | 0  | 0   | 0   | 0   | 0   | 0  | 0  | 0  | 0  | 0 | 0 | 0 |   |
| M02255_77_000000000-ADUT3_1_1118_21701_7058 G---AC---GT-AG-GAT-----GCA-A-G---C-G--T--T-GT-C-CGG-AT-----TT-A-T-T-GG-GC-----GT-A---AA-GA-GT-TC-----G-TA-G-G-C-G-----G--T-TT-G-T-T-----AA---G-T-C-T-----G-A-T--G--TT--A-AA-GA--T-C-GG-G-G---CT-C-AA-----C-C-T-C-G-G-G--A-G---T-G--C-A--T-T-----G--GA-T-A--C-----T-G-G--CA--G-A-C---T-G-G-A-G-T-G---T-GG---TA-G-A-----G-G-T-T--AG-T----GG--A--ATT---C-C-C-A-GT--GT-A-G-CG-GT--G---A-A-A---TG-C-GT-AG--AT-A-TT--A-G--G-A-G-G-A-AC-A-CC---AG--T-G--GC-GTA-G-G-C-G-----A-C-T-A-A---CTG--G--GC-C-A-----T-A--A-C-T-GA--CG-C-T-G--A-GG--A-A-CG-A-AA-G-C--C-AG--GG-G--AG-C-G-AA-----TG--GG |    |    |   |    |     |    |     |    |     |    |     |    |   |    |    |    |     |     |     |     |    |    |    |    |   |   |   |   |
| Bacteria(100);Cyanobacteria(100);MLE1-12(100);unclassified(100);unclassified(100);unclassified(100);unclassified(100);unclassified(100);unclassified(100);                                                                                                                                                                                                                                                                                                                                                                                                                                                                      |    |    |   |    |     |    |     |    |     |    |     |    |   |    |    |    |     |     |     |     |    |    |    |    |   |   |   |   |
| Otu0293                                                                                                                                                                                                                                                                                                                                                                                                                                                                                                                                                                                                                         | 0  | 0  | 0 | 0  | 0   | 0  | 0   | 0  | 0   | 0  | 0   | 0  | 0 | 0  | 0  | 0  | 0   | 0   | 0   | 0   | 0  | 0  | 0  | 0  | 0 | 0 | 0 |   |
|                                                                                                                                                                                                                                                                                                                                                                                                                                                                                                                                                                                                                                 | 0  | 0  | 0 | 0  | 162 | 0  | 0   | 0  | 0   | 0  | 82  | 0  | 0 | 0  | 0  | 70 | 0   | 0   | 0   | 0   | 0  | 0  | 71 | 0  | 0 | 0 | 0 |   |
|                                                                                                                                                                                                                                                                                                                                                                                                                                                                                                                                                                                                                                 | 0  | 88 | 0 | 0  | 0   | 0  | 0   | 0  | 0   | 0  | 15  | 0  | 0 | 35 | 0  | 36 | 0   | 109 | 137 | 0   | 0  | 8  | 0  | 0  | 0 | 0 | 0 |   |
|                                                                                                                                                                                                                                                                                                                                                                                                                                                                                                                                                                                                                                 | 0  | 0  | 0 | 0  | 101 | 0  | 15  | 13 | 0   | 11 | 5   | 60 | 0 | 0  | 0  | 0  | 0   | 0   | 0   | 0   | 0  | 0  | 0  | 0  | 0 | 0 | 0 |   |
| M02255_77_000000000-ADUT3_1_2103_211                                                                                                                                                                                                                                                                                                                                                                                                                                                                                                                                                                                            |    |    |   |    |     |    |     |    |     |    |     |    |   |    |    |    |     |     |     |     |    |    |    |    |   |   |   |   |



[illegible]



|                                                                                                                                                                                                                            |    |     |     |    |    |   |     |    |     |   |     |    |   |    |    |   |    |   |   |   |    |    |    |     |     |   |   |   |
|----------------------------------------------------------------------------------------------------------------------------------------------------------------------------------------------------------------------------|----|-----|-----|----|----|---|-----|----|-----|---|-----|----|---|----|----|---|----|---|---|---|----|----|----|-----|-----|---|---|---|
| Otu0300                                                                                                                                                                                                                    | 0  | 0   | 0   | 0  | 0  | 0 | 0   | 0  | 0   | 0 | 0   | 0  | 0 | 0  | 0  | 0 | 0  | 0 | 0 | 0 | 0  | 0  | 0  | 0   | 0   | 0 | 0 |   |
| 3                                                                                                                                                                                                                          | 0  | 0   | 0   | 0  | 0  | 0 | 0   | 0  | 0   | 0 | 0   | 0  | 0 | 0  | 0  | 0 | 0  | 0 | 0 | 0 | 0  | 0  | 0  | 12  | 0   | 0 | 0 |   |
| 0                                                                                                                                                                                                                          | 0  | 0   | 0   | 0  | 0  | 0 | 0   | 0  | 0   | 0 | 0   | 0  | 0 | 19 | 0  | 0 | 0  | 0 | 0 | 0 | 0  | 0  | 0  | 0   | 0   | 0 | 0 |   |
| 0                                                                                                                                                                                                                          | 0  | 0   | 0   | 0  | 0  | 0 | 0   | 0  | 0   | 0 | 0   | 0  | 0 | 0  | 21 | 0 | 0  | 0 | 0 | 0 | 0  | 0  | 0  | 0   | 0   | 0 | 0 |   |
| M02255_77_000000000-ADUT3_1_1110_16850_12127 T---AC---GT-AG-GTG-----GCA-A-G-----C-G-T---T-GT-C-CGG-AT-----TT-A-C-T-GG-GT-----GT-A---AA-GG-GT-GC-----G-CA-G-G-C-G-----G--A-CC-T-T-T-----                                    |    |     |     |    |    |   |     |    |     |   |     |    |   |    |    |   |    |   |   |   |    |    |    |     |     |   |   |   |
| ----AA---G-T-A-G-----A-A-A-G-TG-A-AA-GG--T-T-GG-A-G----CT-C-AA-----C-T-C-C-G-A-C--A-C---T-G--C-T---T-C-----C-TA-T-A---C-----T-G-G--GG--G-T-C---T-T-G-A-G-T-T---T-CG----GA-G-G-----G-G-G-A---AG-C-----GG-A--ACG---A-        |    |     |     |    |    |   |     |    |     |   |     |    |   |    |    |   |    |   |   |   |    |    |    |     |     |   |   |   |
| C-A-C-GT--GT-A-G-CG-GT--G---A--A-A---TG-C-GT-TG--AT-A-TG--T-G--T-C-G-G-A-AC-A-CC---AA-T-G--GC-GAA-A-G-C-A-----G--C-T-T-C---CTG--G--AC-G-A-----A-T---A-C-T--GA-CG-C-T-C--A-GG--C-A-CG-A--AA-G-C---C-AA--GG-T--              |    |     |     |    |    |   |     |    |     |   |     |    |   |    |    |   |    |   |   |   |    |    |    |     |     |   |   |   |
| AG-C-A-AA-----CA--GG Bacteria(100);unclassified(100);unclassified(100);unclassified(100);unclassified(100);unclassified(100);unclassified(100);unclassified(100);unclassified(100);                                        |    |     |     |    |    |   |     |    |     |   |     |    |   |    |    |   |    |   |   |   |    |    |    |     |     |   |   |   |
| Otu0301                                                                                                                                                                                                                    | 0  | 0   | 0   | 0  | 0  | 0 | 0   | 0  | 0   | 0 | 0   | 0  | 0 | 0  | 0  | 0 | 0  | 0 | 0 | 0 | 0  | 0  | 0  | 0   | 0   | 0 | 0 |   |
| 0                                                                                                                                                                                                                          | 0  | 0   | 0   | 0  | 0  | 0 | 73  | 0  | 0   | 0 | 0   | 0  | 0 | 0  | 0  | 0 | 0  | 0 | 0 | 0 | 0  | 0  | 0  | 0   | 0   | 0 | 0 |   |
| 0                                                                                                                                                                                                                          | 0  | 0   | 0   | 0  | 0  | 0 | 0   | 0  | 0   | 0 | 0   | 0  | 0 | 0  | 0  | 0 | 0  | 0 | 0 | 0 | 0  | 1  | 0  | 0   | 0   | 0 | 0 |   |
| 0                                                                                                                                                                                                                          | 0  | 0   | 0   | 0  | 0  | 0 | 0   | 0  | 0   | 0 | 0   | 0  | 0 | 0  | 0  | 0 | 0  | 0 | 0 | 0 | 0  | 0  | 0  | 0   | 418 | 0 | 0 |   |
| M02255_77_000000000-ADUT3_1_1116_9154_19407 C---AC---GT-AG-GGG-----GCA-A-G-----C-G-T---T-GT-C-CGG-AT-----TT-A-T-T-GG-GC-----GT-A---AA-GA-GC-TC-----G-TA-G-G-C-G-----G--T-TT-C-G-T-----AA-                                  |    |     |     |    |    |   |     |    |     |   |     |    |   |    |    |   |    |   |   |   |    |    |    |     |     |   |   |   |
| ---G-T-C-G-----G-G-T--G--TG--A-AA-AC--T-C-TA-G-G----CT-C-AA-----C-C-T-G-G-A-G-A-----C-G-CC-A--C-C-----C-GA-T-A---C-----T-G-C--GA-TG-A-C---T-A-G-A-G-T-C---C-GG----TA-G-G-----G-G-A-G---TG-T-----GG-A--ATT---C-C-T-G-       |    |     |     |    |    |   |     |    |     |   |     |    |   |    |    |   |    |   |   |   |    |    |    |     |     |   |   |   |
| GT--GT-A-G-CG-GT--G---A--A-A---TG-C-GC-AG--AT-A-TC--A-G--G-A-G-G-A-AC-A-CC---AA-C-G--GC-GAA-G--G-C-A-----G--C-A-C-T---CTG--G--GC-C-G-----G-A---A-C-T--GA-CG-C-T-G--A-GG--A-G-CG-A--AA-G-C---G-TG--GG-T--AG-                |    |     |     |    |    |   |     |    |     |   |     |    |   |    |    |   |    |   |   |   |    |    |    |     |     |   |   |   |
| C-G-AA-----CA--GG Bacteria(100);Actinobacteria(100);Actinobacteria(100);Acidimicrobidae(100);Acidimicrobiales(100);Acidimicrobineae(100);unclassified(86);unclassified(86);unclassified(86);                               |    |     |     |    |    |   |     |    |     |   |     |    |   |    |    |   |    |   |   |   |    |    |    |     |     |   |   |   |
| Otu0302                                                                                                                                                                                                                    | 0  | 168 | 120 | 0  | 0  | 8 | 327 | 36 | 432 | 0 | 0   | 0  | 3 | 0  | 0  | 0 | 0  | 0 | 0 | 0 | 0  | 0  | 22 | 0   | 0   | 0 | 0 | 0 |
| 0                                                                                                                                                                                                                          | 0  | 0   | 55  | 0  | 0  | 0 | 0   | 19 | 0   | 0 | 179 | 33 | 0 | 24 | 0  | 0 | 0  | 0 | 0 | 0 | 0  | 3  | 0  | 0   | 0   | 0 | 0 | 0 |
| 0                                                                                                                                                                                                                          | 0  | 0   | 3   | 0  | 0  | 0 | 0   | 0  | 0   | 0 | 0   | 6  | 0 | 0  | 0  | 0 | 13 | 0 | 0 | 0 | 5  | 0  | 0  | 0   | 0   | 0 | 0 | 0 |
| 0                                                                                                                                                                                                                          | 0  | 0   | 0   | 0  | 23 | 7 | 0   | 0  | 29  | 0 | 54  | 5  | 0 | 1  | 0  | 0 | 0  | 0 | 0 | 0 | 0  | 14 | 8  | 184 | 0   | 0 | 0 | 0 |
| M02255_77_000000000-ADUT3_1_1108_10443_14249 T---AC---GT-AG-GGG-----GCA-A-G-----C-G-T---T--AT-C-CGG-AT-----TT-A-C-T-GG-GT-----GT-A---AA-GG-GA-GC-----G-TA-G-A-C-G-----G--A-TT-A-G-C-----                                   |    |     |     |    |    |   |     |    |     |   |     |    |   |    |    |   |    |   |   |   |    |    |    |     |     |   |   |   |
| ----AA---G-T-C-T-----G-A-T--G--TG--A-AA-GG--C-A-GG-G-G----CT-C-AA-----C-C-C-C-T-G-G-A-C---T-G--C-A---T-T-----G--GA-A-A---C-----T-G-C--CA-G-T-C---T-T-G-A-G-T--G---C-CG----GA-G-A-----G-G-T-A---AG-C-----GG--A--ATT---      |    |     |     |    |    |   |     |    |     |   |     |    |   |    |    |   |    |   |   |   |    |    |    |     |     |   |   |   |
| C-C-T-A-GT--GT-A-G-CG-GT--G---A--A-A---TG-C-GT-AG--AT-A-TT--A-G--G-A-G-G-A-AC-A-CC---AG--T-G--GC-GAA-G--G-C-G-----G--C-T-T-A---CTG--G--AC-G-G-----C-A---A-C-T--GA--CG-T-T-G--A-GG--C-T-CG-A--AA-G-C---G-TG--GG-            |    |     |     |    |    |   |     |    |     |   |     |    |   |    |    |   |    |   |   |   |    |    |    |     |     |   |   |   |
| G--AG-C-A-AA-----CA--GG Bacteria(100);Firmicutes(100);Clostridia(100);Clostridiales(100);Lachnospiraceae(100);Blautia(93);unclassified(93);unclassified(93);unclassified(93);                                              |    |     |     |    |    |   |     |    |     |   |     |    |   |    |    |   |    |   |   |   |    |    |    |     |     |   |   |   |
| Otu0303                                                                                                                                                                                                                    | 0  | 0   | 0   | 0  | 0  | 0 | 0   | 0  | 0   | 0 | 0   | 0  | 0 | 0  | 0  | 0 | 0  | 0 | 0 | 0 | 12 | 1  | 0  | 0   | 0   | 0 | 0 | 0 |
| 0                                                                                                                                                                                                                          | 0  | 0   | 0   | 0  | 48 | 0 | 0   | 0  | 29  | 2 | 60  | 0  | 0 | 0  | 0  | 0 | 0  | 0 | 0 | 0 | 0  | 0  | 0  | 0   | 0   | 0 | 0 | 0 |
| 0                                                                                                                                                                                                                          | 0  | 0   | 0   | 0  | 0  | 0 | 0   | 0  | 0   | 0 | 0   | 0  | 0 | 0  | 0  | 0 | 20 | 0 | 0 | 0 | 0  | 0  | 0  | 0   | 0   | 0 | 0 | 0 |
| 0                                                                                                                                                                                                                          | 0  | 0   | 0   | 0  | 0  | 0 | 0   | 0  | 0   | 0 | 0   | 0  | 0 | 0  | 0  | 0 | 0  | 0 | 0 | 0 | 0  | 0  | 0  | 0   | 0   | 0 | 0 | 0 |
| M02255_77_000000000-ADUT3_1_1106_16218_10891 T---AC---GA-AG-GGG-----GCT-A-G-----C-G-T---T--GT-T-CGG-AA-----TC-A-C-T-GG-GC-----GT-A---AA-GC-GC-AC-----G-TA-G-G-C-G-----G--A-TG-T-G-C-----                                   |    |     |     |    |    |   |     |    |     |   |     |    |   |    |    |   |    |   |   |   |    |    |    |     |     |   |   |   |
| -----CA---G-T-C-A-----G-G-G--G--TG--A-AA-TC--C-C-GG-A-G----CT-C-AA-----C-T-T-C-G-G-A--A-C---T-G--C-C---T-C-----T--GA-T-A---C-----A--G-C--AC--G-T-C---T-T-G-A-G-T--C---C-GG----AA-G-A-----G-G-T-G---GG-T-----GG--A--ATT---  |    |     |     |    |    |   |     |    |     |   |     |    |   |    |    |   |    |   |   |   |    |    |    |     |     |   |   |   |
| C-C-T-A-GT--GT-A-G-AG-GT--G---A--A-A---TT-C-GT-AG--AT-A-TT--A-G--G-A-A-G-A-AC-A-CC---GG--T--G--GC-GAA-G--G-C-G-----G--C-C-C-A---CTG--G--TC-C-G-----G-T---A-C-T--GA--CG-C-T-G--A-GG--T-G-CG-A--AA-G-C---G-TG--GG-           |    |     |     |    |    |   |     |    |     |   |     |    |   |    |    |   |    |   |   |   |    |    |    |     |     |   |   |   |
| G--AG-C-A-AA-----CA--GG Bacteria(100);Proteobacteria(100);Alphaproteobacteria(100);Rhizobiales(100);Hyphomicrobiaceae(100);unclassified(62);unclassified(62);unclassified(62);unclassified(62);                            |    |     |     |    |    |   |     |    |     |   |     |    |   |    |    |   |    |   |   |   |    |    |    |     |     |   |   |   |
| Otu0304                                                                                                                                                                                                                    | 0  | 0   | 0   | 30 | 0  | 0 | 0   | 0  | 0   | 0 | 0   | 0  | 0 | 0  | 0  | 0 | 0  | 0 | 0 | 0 | 0  | 0  | 0  | 0   | 0   | 2 | 0 | 4 |
| 0                                                                                                                                                                                                                          | 0  | 0   | 5   | 0  | 0  | 0 | 0   | 0  | 1   | 0 | 0   | 0  | 0 | 0  | 2  | 0 | 0  | 0 | 0 | 0 | 0  | 8  | 0  | 0   | 5   | 0 | 0 | 0 |
| 0                                                                                                                                                                                                                          | 0  | 0   | 0   | 0  | 0  | 0 | 0   | 0  | 0   | 0 | 0   | 0  | 0 | 0  | 0  | 0 | 1  | 0 | 0 | 0 | 0  | 1  | 0  | 0   | 0   | 0 | 0 | 0 |
| 140                                                                                                                                                                                                                        | 22 | 0   | 0   | 0  | 0  | 0 | 0   | 0  | 0   | 0 | 0   | 0  | 0 | 0  | 0  | 0 | 0  | 0 | 6 | 0 | 0  | 4  | 0  | 0   | 0   | 0 | 0 | 0 |
| M02255_77_000000000-ADUT3_1_2109_24722_9350 T----AA---AT-AC-GTG-----CC--A-G-----C--A--G---C--CG-C-GGT-AA-----TA-C--G-T--AT-GT-----CC--C----GA-GC-GT-TA-----T-CC-G----G-----A--T-TT-A-T-T-----AA----                        |    |     |     |    |    |   |     |    |     |   |     |    |   |    |    |   |    |   |   |   |    |    |    |     |     |   |   |   |
| G-T-C-T-----G-A-T--G--TG--A-AA-GC--C-C-GG-A-G----CT-C-AA-----C-T-C-C-G-G-A--A-A---G-G--C-A---T-T-----G--GA-A-A---C-----T--G-G--TT--A-A-C---T-T-G-A-G-T--G---C-AG----TA-G-A-----G-G-T-A---AG-T-----GG--A--ACT---C-C-A-T-GT- |    |     |     |    |    |   |     |    |     |   |     |    |   |    |    |   |    |   |   |   |    |    |    |     |     |   |   |   |
| -GT-A-G-CG-GT--G---G--A-A---TG-C-GT-AG--AT-A-TA--T-G--G-A-A-G-A-AC-A-CC---AG--C--G--GC-GAA-G--G-C-G-----G--C-T-T-A---CTG--G--AC-T-G-----T-A---A-C-T--GA--CG-T-T-G--A-GG--C-T-CG-A--AA-G-T---G-TG--GG-T--AG-C-A-            |    |     |     |    |    |   |     |    |     |   |     |    |   |    |    |   |    |   |   |   |    |    |    |     |     |   |   |   |
| AA-----CA--GG Bacteria(100);Firmicutes(100);Bacilli(100);Lactobacillales(100);Leuconostocaceae(100);Leuconostoc(100);unclassified(100);unclassified(100);unclassified(100);                                                |    |     |     |    |    |   |     |    |     |   |     |    |   |    |    |   |    |   |   |   |    |    |    |     |     |   |   |   |



|                                                                                                                                                                                                                              |   |    |   |   |   |    |    |   |   |    |   |   |   |    |   |    |    |    |   |   |   |    |    |   |    |   |     |
|------------------------------------------------------------------------------------------------------------------------------------------------------------------------------------------------------------------------------|---|----|---|---|---|----|----|---|---|----|---|---|---|----|---|----|----|----|---|---|---|----|----|---|----|---|-----|
| Otu0305                                                                                                                                                                                                                      | 0 | 0  | 0 | 0 | 0 | 0  | 0  | 0 | 0 | 0  | 0 | 0 | 0 | 0  | 0 | 0  | 0  | 0  | 0 | 0 | 0 | 0  | 0  | 0 | 0  | 0 | 0   |
|                                                                                                                                                                                                                              | 0 | 0  | 0 | 0 | 0 | 0  | 0  | 0 | 0 | 0  | 0 | 0 | 0 | 0  | 0 | 0  | 0  | 0  | 0 | 0 | 0 | 0  | 0  | 0 | 0  | 0 | 0   |
|                                                                                                                                                                                                                              | 0 | 0  | 0 | 0 | 0 | 0  | 0  | 0 | 0 | 0  | 0 | 0 | 0 | 0  | 0 | 20 | 25 | 0  | 0 | 0 | 0 | 0  | 0  | 0 | 0  | 0 | 0   |
|                                                                                                                                                                                                                              | 0 | 0  | 0 | 0 | 0 | 0  | 0  | 0 | 0 | 0  | 0 | 0 | 0 | 0  | 0 | 0  | 0  | 0  | 0 | 0 | 0 | 0  | 0  | 0 | 11 |   |     |
| M02255_76_000000000-ADUNE_1_1102_23645_24647 C---CG---GC-TA-ACT-----TCG-T-G-----C--C--A--G--CA-G-CCG-CG-----GT-A--A-T--AC-GA-----AG--G-----GT-GC-AA-GC-----G-TT-GTT-C-G-----G--A-TC-A-G-C-----                               |   |    |   |   |   |    |    |   |   |    |   |   |   |    |   |    |    |    |   |   |   |    |    |   |    |   |     |
| -----AA---G-T-C-A-----G-A-T--G--TG--A-AA-TC--T-C-GA-A-G-----CT-C-AA-----C-T-T-C-G-A-A--A-C---T-G--C-G---T--C-----T--GA-A-A--C-----T--G-C--TA--G-T-C---T-A-G-A-A-T--G---T-CG-----GA-G-G-----G-G-G-C--AG-G-----GG--A--ATT---T- |   |    |   |   |   |    |    |   |   |    |   |   |   |    |   |    |    |    |   |   |   |    |    |   |    |   |     |
| C-A-C-GT--GT-A-G-GG-GT--A---A--A-A---TC-C-GT-AG--AG-A-TG--T-G--A-A-G-G-A-AC-A-CC---GG--A--G--GC-GAA-G--G-C-G-----C--C-T-G-C--CTG--G--AC-G-A-----C-T--A-T-T--GA--CG-C-T-G--A-GG--C-G-CG-A--AA-G-C---G-TG--GG-                 |   |    |   |   |   |    |    |   |   |    |   |   |   |    |   |    |    |    |   |   |   |    |    |   |    |   |     |
| G--AG-C-A-AA-----CA--GG Bacteria(100);Proteobacteria(100);Deltaproteobacteria(100);Bdellovibrionales(100);Bacteriovoraceae(100);Peredibacter(100);unclassified(100);unclassified(100);unclassified(100);                     |   |    |   |   |   |    |    |   |   |    |   |   |   |    |   |    |    |    |   |   |   |    |    |   |    |   |     |
| Otu0306                                                                                                                                                                                                                      | 0 | 2  | 0 | 0 | 0 | 0  | 0  | 0 | 0 | 1  | 0 | 4 | 2 | 0  | 0 | 0  | 0  | 4  | 2 | 0 | 0 | 0  | 0  | 0 | 0  | 0 | 0   |
|                                                                                                                                                                                                                              | 0 | 0  | 0 | 0 | 0 | 0  | 0  | 0 | 0 | 0  | 0 | 0 | 0 | 0  | 0 | 4  | 0  | 0  | 0 | 0 | 0 | 0  | 0  | 0 | 0  | 0 | 0   |
|                                                                                                                                                                                                                              | 0 | 0  | 0 | 0 | 0 | 0  | 0  | 0 | 0 | 0  | 0 | 0 | 0 | 0  | 0 | 0  | 0  | 0  | 0 | 0 | 7 | 0  | 0  | 0 | 0  | 0 | 0   |
|                                                                                                                                                                                                                              | 0 | 0  | 0 | 0 | 0 | 2  | 15 | 0 | 0 | 0  | 0 | 0 | 0 | 0  | 5 | 1  | 0  | 0  | 0 | 0 | 0 | 0  | 0  | 0 | 0  | 0 | 0   |
| M02255_77_000000000-ADUT3_1_1115_19704_2920 C---TA---AC-TC-TGT-----GCC-A-G-----C---A--G--CC-G-CGG-TA-----AT-A--C-A--GA-GG-----GTG-C-----AA-GC-GT-TA-----A-TC-G-GAATT-----A--C-TT-G-A-T-----AA-                               |   |    |   |   |   |    |    |   |   |    |   |   |   |    |   |    |    |    |   |   |   |    |    |   |    |   |     |
| ---G-T-C-A-----G-A-T--G--TG--A-AA-TC--C-C-CG-G-G-----CT-T-AA-----C-C-T-G-G-G-A--A-C---T-G--C-A--T--C-----T--GA-A-A--C-----T--G-T-TA--G-G-C---T-A-G-A-G-T--A--G-GT---GA-G-A-----G-G-G-A--AG-T-----AG--A--ATT---T-C-A-G-       |   |    |   |   |   |    |    |   |   |    |   |   |   |    |   |    |    |    |   |   |   |    |    |   |    |   |     |
| GT--GT-A-G-CG-GT--G---A--A-A---TG-C-GT-AG--AG-A-TC--T-G--A-A-G-G-A-AT-A-CC---GA--T--G--GC-GAA-G--G-C-A-----G--C-T-T-C--CTG--G--CA-T-C-----A-T---A-C-T--GA--CA-C-T-G--A-GG--C-T-CG-A--AA-G-C---G-TG--GG-T--AG-C-              |   |    |   |   |   |    |    |   |   |    |   |   |   |    |   |    |    |    |   |   |   |    |    |   |    |   |     |
| A-AA-----CA--GG Bacteria(100);Proteobacteria(100);Gammaproteobacteria(100);Pseudomonadales(100);Moraxellaceae(100);Psychrobacter(92);unclassified(92);unclassified(92);unclassified(92);                                     |   |    |   |   |   |    |    |   |   |    |   |   |   |    |   |    |    |    |   |   |   |    |    |   |    |   |     |
| Otu0307                                                                                                                                                                                                                      | 0 | 0  | 0 | 0 | 0 | 0  | 0  | 0 | 0 | 0  | 0 | 0 | 0 | 0  | 0 | 0  | 0  | 0  | 0 | 0 | 0 | 0  | 0  | 0 | 0  | 0 | 0   |
|                                                                                                                                                                                                                              | 0 | 0  | 0 | 0 | 0 | 54 | 0  | 0 | 0 | 0  | 0 | 0 | 0 | 0  | 0 | 0  | 0  | 0  | 0 | 0 | 0 | 0  | 0  | 0 | 0  | 0 | 0   |
|                                                                                                                                                                                                                              | 0 | 0  | 0 | 0 | 0 | 0  | 0  | 0 | 0 | 0  | 0 | 0 | 0 | 0  | 0 | 0  | 0  | 0  | 0 | 0 | 0 | 0  | 0  | 0 | 0  | 0 | 0   |
|                                                                                                                                                                                                                              | 0 | 0  | 0 | 0 | 0 | 0  | 0  | 0 | 0 | 0  | 0 | 0 | 0 | 0  | 0 | 0  | 0  | 45 | 0 | 0 | 0 | 17 | 0  | 0 | 0  | 0 | 0   |
| M02255_77_000000000-ADUT3_1_1102_7651_10536 G---AC---GA-AG-GGG-----GCT-A-G-----C--G--T---T--GT-T-CGG-AA-----TT-A--C-T--GG-GC-----GT--A---AA-GC-GA-GT-----G-TA-G-G-T-G-----G--T-TG-T-C-G-----                                 |   |    |   |   |   |    |    |   |   |    |   |   |   |    |   |    |    |    |   |   |   |    |    |   |    |   |     |
| TA---G-T-C-A-----G-G-C--G--TG--A-AA-GC--C-T-TG-A-G-----CT-C-AA-----C-T-C-A-A-G-A--A-A---T-G--C-G---C--T-----T--GA-T-A--C-----T--G-G--GC--A-G-C---T-A-G-A-G-G--A--C-CG---GA-G-A-----G-G-A-T--AG-T-----GG--A--ATT---C-C-C-     |   |    |   |   |   |    |    |   |   |    |   |   |   |    |   |    |    |    |   |   |   |    |    |   |    |   |     |
| A-GT--GT-A-G-TG-GT--G---A--A-A---TA-C-GT-AG--AG-A-TT--G-G--G-A-A-G-A-AC-A-CC---AG--T--G--GC-GAA-G--G-C-G-----G--C-T-A-T--CTG--G--AC-G-G-----T-T---T-C-T--GA--CA-C-T-A--A-GA--C-T-CG-A--AA-G-C---G-TG--GG-G--AG-              |   |    |   |   |   |    |    |   |   |    |   |   |   |    |   |    |    |    |   |   |   |    |    |   |    |   |     |
| C-A-AA-----CA--GG Bacteria(100);Proteobacteria(100);Alphaproteobacteria(100);Rhodospirillales(100);wr0007(100);unclassified(100);unclassified(100);unclassified(100);unclassified(100);                                      |   |    |   |   |   |    |    |   |   |    |   |   |   |    |   |    |    |    |   |   |   |    |    |   |    |   |     |
| Otu0308                                                                                                                                                                                                                      | 0 | 57 | 0 | 0 | 0 | 0  | 0  | 0 | 0 | 0  | 0 | 0 | 0 | 0  | 0 | 0  | 0  | 0  | 0 | 0 | 0 | 0  | 0  | 0 | 0  | 0 | 0   |
|                                                                                                                                                                                                                              | 0 | 0  | 0 | 0 | 0 | 0  | 0  | 0 | 0 | 0  | 0 | 0 | 0 | 0  | 0 | 0  | 0  | 0  | 0 | 0 | 0 | 0  | 0  | 0 | 0  | 0 | 173 |
|                                                                                                                                                                                                                              | 0 | 0  | 0 | 0 | 0 | 0  | 0  | 0 | 0 | 0  | 0 | 0 | 0 | 0  | 0 | 0  | 0  | 0  | 0 | 0 | 0 | 0  | 0  | 0 | 0  | 0 | 0   |
|                                                                                                                                                                                                                              | 0 | 0  | 0 | 0 | 0 | 0  | 0  | 0 | 0 | 23 | 0 | 0 | 0 | 0  | 0 | 0  | 0  | 0  | 0 | 0 | 0 | 0  | 0  | 0 | 0  | 0 | 0   |
| M02255_77_000000000-ADUT3_1_1105_9047_8011 T---AC---GT-AG-GGG-----GCA-A-G-----C--G--T---T--GT-C-CGG-AT-----TC-A--T-T--GG-GC-----GT--A---AA-GA-GC-TC-----G-TA-G-G-C-G-----G--C-TT-G-G-C-----AA-                               |   |    |   |   |   |    |    |   |   |    |   |   |   |    |   |    |    |    |   |   |   |    |    |   |    |   |     |
| ---G-T-C-G-----G-G-T--G--TG--A-AA-AC--T-T-CA-G-G-----CT-C-AA-----C-C-T-G-G-A-G--C-----G-G-CC-A--C--T-----C--GA-T-A--C-----T--G-C--CA-TG-G-C---T-A-G-A-G-T--C---C-GG---TA-G-G-----G-G-A-C--CA-C-----GG--A--ATT---C-C-T-G-     |   |    |   |   |   |    |    |   |   |    |   |   |   |    |   |    |    |    |   |   |   |    |    |   |    |   |     |
| GT--GT-A-G-CG-GT--G---A--A-A---TG-C-GC-AG--AT-A-TC--A-G--G-A-G-G-A-AC-A-CC---GG--T--G--GC-GAA-G--G-C-G-----G--T-G-G-T--CTG--G--GC-C-G-----G-A--A-C-T--GA--CG-C-T-G--A-GG--A-G-CG-A--AA-G-C---G-TG--GG-G--AG-                 |   |    |   |   |   |    |    |   |   |    |   |   |   |    |   |    |    |    |   |   |   |    |    |   |    |   |     |
| C-G-AA-----CA--GG Bacteria(100);Actinobacteria(100);Actinobacteria(100);Acidimicrobidae(73);Acidimicrobiales(73);Acidimicrobineae(73);unclassified(73);unclassified(73);unclassified(73);                                    |   |    |   |   |   |    |    |   |   |    |   |   |   |    |   |    |    |    |   |   |   |    |    |   |    |   |     |
| Otu0309                                                                                                                                                                                                                      | 0 | 0  | 0 | 0 | 0 | 0  | 0  | 0 | 0 | 0  | 0 | 0 | 0 | 0  | 0 | 0  | 0  | 0  | 0 | 0 | 0 | 0  | 16 | 0 | 0  | 0 | 0   |
|                                                                                                                                                                                                                              | 0 | 0  | 0 | 0 | 0 | 0  | 0  | 0 | 0 | 0  | 0 | 0 | 0 | 61 | 0 | 0  | 0  | 0  | 0 | 0 | 0 | 0  | 19 | 0 | 0  | 0 | 0   |
|                                                                                                                                                                                                                              | 0 | 0  | 0 | 0 | 0 | 0  | 0  | 0 | 0 | 0  | 0 | 0 | 0 | 0  | 0 | 0  | 43 | 0  | 0 | 0 | 0 | 0  | 0  | 0 | 0  | 0 | 0   |
|                                                                                                                                                                                                                              | 0 | 0  | 0 | 0 | 0 | 0  | 0  | 0 | 0 | 0  | 0 | 0 | 0 | 0  | 0 | 0  | 0  | 0  | 0 | 0 | 0 | 0  | 0  | 0 | 0  | 0 | 0   |
| M02255_77_000000000-ADUT3_1_1104_8050_6830 T---AC---GA-AG-GGG-----GCT-A-G-----C--G--T---T--GC-T-CGG-AA-----TC-A--C-T--GG-GC-----GT--A---AA-GG-GC-GC-----G-TA-G-G-C-G-----G--C-CA-T-T-C-----                                  |   |    |   |   |   |    |    |   |   |    |   |   |   |    |   |    |    |    |   |   |   |    |    |   |    |   |     |
| AA---G-T-C-G-----G-A-G--G--TG--A-AA-GC--C-C-AG-G-G-----CT-C-AA-----C-C-C-T-G-G-A--A-T---T-G--C-C---T--T-----C--GA-T-A--C-----T--G-T--TT--G-G-C---T-A-G-A-G-A--C---C-GG---AA-G-A-----G-G-T-A--AG-T-----GG--A--ACT---G-C-      |   |    |   |   |   |    |    |   |   |    |   |   |   |    |   |    |    |    |   |   |   |    |    |   |    |   |     |
| G-A-GT--GT-A-G-AG-GT--G---A--A-A---TT-C-GT-AG--AT-A-TT--C-G--C-A-A-G-A-AC-A-CC---AG--T--G--GC-GAA-G--G-C-G-----G--C-T-T-A--CTG--G--TC-C-G-----G-T---T-C-T--GA--CG-C-T-G--A-GG--C-G-CG-A--AA-G-C---G-TG--GG-G--               |   |    |   |   |   |    |    |   |   |    |   |   |   |    |   |    |    |    |   |   |   |    |    |   |    |   |     |
| AG-C-A-AA-----CA--GG Bacteria(100);Proteobacteria(100);Alphaproteobacteria(100);unclassified(89);unclassified(89);unclassified(89);unclassified(89);unclassified(89);unclassified(89);                                       |   |    |   |   |   |    |    |   |   |    |   |   |   |    |   |    |    |    |   |   |   |    |    |   |    |   |     |



|                                                                                                                                                                                                                                                                                                                                                                                                                                                                                                                                                                                                                                                                                                                                                                                                                   |    |    |   |    |   |    |    |    |   |   |    |   |   |   |    |    |    |   |   |   |   |   |   |    |   |   |   |   |
|-------------------------------------------------------------------------------------------------------------------------------------------------------------------------------------------------------------------------------------------------------------------------------------------------------------------------------------------------------------------------------------------------------------------------------------------------------------------------------------------------------------------------------------------------------------------------------------------------------------------------------------------------------------------------------------------------------------------------------------------------------------------------------------------------------------------|----|----|---|----|---|----|----|----|---|---|----|---|---|---|----|----|----|---|---|---|---|---|---|----|---|---|---|---|
| Otu0310                                                                                                                                                                                                                                                                                                                                                                                                                                                                                                                                                                                                                                                                                                                                                                                                           | 0  | 0  | 0 | 0  | 0 | 0  | 0  | 0  | 0 | 0 | 0  | 0 | 0 | 0 | 0  | 0  | 0  | 0 | 0 | 0 | 0 | 0 | 0 | 0  | 1 | 0 | 0 | 8 |
|                                                                                                                                                                                                                                                                                                                                                                                                                                                                                                                                                                                                                                                                                                                                                                                                                   | 0  | 0  | 0 | 0  | 0 | 0  | 0  | 0  | 0 | 0 | 0  | 0 | 0 | 0 | 0  | 0  | 0  | 0 | 0 | 0 | 0 | 0 | 0 | 23 | 0 | 0 | 0 | 0 |
|                                                                                                                                                                                                                                                                                                                                                                                                                                                                                                                                                                                                                                                                                                                                                                                                                   | 0  | 0  | 0 | 0  | 0 | 0  | 0  | 0  | 0 | 0 | 0  | 0 | 0 | 0 | 0  | 0  | 0  | 0 | 0 | 0 | 0 | 6 | 0 | 0  | 0 | 0 | 0 | 0 |
|                                                                                                                                                                                                                                                                                                                                                                                                                                                                                                                                                                                                                                                                                                                                                                                                                   | 0  | 0  | 0 | 0  | 0 | 30 | 0  | 0  | 0 | 0 | 0  | 0 | 0 | 0 | 0  | 0  | 0  | 0 | 0 | 0 | 0 | 0 | 0 | 0  | 0 | 0 |   |   |
| M02255_77_000000000-ADUT3_1_1104_9764_15253 T---AC---GA-AG-GGG-----GCT-A-G-----C-G-T---T-GT-T-CGG-AT-----TT-A-C-T-GG-GC-----GT-A---AA-GC-GC-AC-----G-TA-G-G-C-G-----G-A-TT-G-G-T-----CA-<br>---G-T-T-A-----G-A-G-G-TG-A-AA-TC--C-C-GA-A-G---CT-C-AA-----C-T-T-C-G-G-A-A-C---T-G--C-C---T-T-----T-AA-T-A--C-----T-G-C-CA-A-T-C---T-A-G-A-G-T-C---C-GG----AA-G-A-----G-G-T-G---AG-T-----GG--A-ACT---C-C-T-A-<br>GT--GT-A-G-AG-GT-G---G--A-A---TT-C-GT-AG--AT-A-TT--A-G--G-A-A-G-A-AC-A-CC--AG--T-G--GC-GAA-G-G-C-G-----G-C-T-C-A---CTG-G-TC-C-G-----G-T--A-C-T-GA--CG-C-T-G-A-GG--T-G-CG-A-AA-G-C---G-TG--GG-G--AG-<br>C-A-AA-----CA--GG     Bacteria(100);Proteobacteria(100);Alphaproteobacteria(100);Rhizobiales(100);unclassified(100);unclassified(100);unclassified(100);unclassified(100);unclassified(100); |    |    |   |    |   |    |    |    |   |   |    |   |   |   |    |    |    |   |   |   |   |   |   |    |   |   |   |   |
| Otu0311                                                                                                                                                                                                                                                                                                                                                                                                                                                                                                                                                                                                                                                                                                                                                                                                           | 0  | 1  | 0 | 0  | 0 | 1  | 0  | 0  | 0 | 0 | 0  | 0 | 1 | 0 | 0  | 0  | 0  | 0 | 0 | 0 | 2 | 0 | 0 | 0  | 0 | 0 | 0 | 0 |
|                                                                                                                                                                                                                                                                                                                                                                                                                                                                                                                                                                                                                                                                                                                                                                                                                   | 0  | 0  | 0 | 2  | 0 | 0  | 1  | 0  | 1 | 0 | 0  | 0 | 0 | 1 | 1  | 0  | 0  | 0 | 0 | 0 | 0 | 0 | 0 | 1  | 0 | 0 | 1 | 0 |
|                                                                                                                                                                                                                                                                                                                                                                                                                                                                                                                                                                                                                                                                                                                                                                                                                   | 0  | 0  | 0 | 0  | 0 | 0  | 0  | 0  | 0 | 0 | 0  | 0 | 0 | 0 | 0  | 1  | 0  | 1 | 0 | 0 | 0 | 0 | 1 | 0  | 0 | 0 | 0 | 6 |
|                                                                                                                                                                                                                                                                                                                                                                                                                                                                                                                                                                                                                                                                                                                                                                                                                   | 0  | 0  | 0 | 0  | 5 | 0  | 0  | 0  | 0 | 0 | 0  | 0 | 0 | 0 | 0  | 0  | 0  | 0 | 0 | 4 | 0 | 0 | 0 | 0  | 0 | 0 | 4 |   |
| M02255_76_000000000-ADUNE_1_1115_19734_3075 .....CG---GT-AT-CTT-----ACC-A-G-----A-A-A--G--GG-A-CGG--C-----TA-A-C-T--AC-GT-----G--C---CA-GC-AG-CC-----G-CG-G-T-A-A-----T-A-CG-T-A-G-----GT---<br>C-C-C-G-----A-G-C--G--TT--ATCC-GG--A-T-GT-G-G---CT-T-AA-----C-C-A-T-A-G-T-A-----C-G--C-T---T-T-----G--GA-A-A--C-----T-G-T-TT--A-A-C---T-T-G-A-G-T-G--C-AA---GA-G-G-----G-G-A-G---AG-T-----GG--A-ATT---C-C-A-T-GT--<br>GT-A-G-CG-GT-G---A-A-A--TG-C-GT-AG--AT-A-TA--T-G--G-A-G-G-A-AC-A-CC--GG--T-G--GC-GAA-A-G-C-G-----G-C-T-C-T---CTG-G-CT-T-G-----T-A--A-C-T-GA--CG-C-T-G-A-GG--C-T-CG-A-AA-G-C---G-TG--GG-G--AG-C-A-<br>AA-----CA--GG     Bacteria(100);unclassified(100);unclassified(100);unclassified(100);unclassified(100);unclassified(100);unclassified(100);unclassified(100);unclassified(100);       |    |    |   |    |   |    |    |    |   |   |    |   |   |   |    |    |    |   |   |   |   |   |   |    |   |   |   |   |
| Otu0312                                                                                                                                                                                                                                                                                                                                                                                                                                                                                                                                                                                                                                                                                                                                                                                                           | 0  | 89 | 0 | 0  | 0 | 0  | 64 | 89 | 0 | 0 | 0  | 0 | 0 | 0 | 0  | 1  | 0  | 0 | 0 | 0 | 0 | 0 | 0 | 0  | 0 | 0 | 3 | 1 |
|                                                                                                                                                                                                                                                                                                                                                                                                                                                                                                                                                                                                                                                                                                                                                                                                                   | 0  | 0  | 0 | 0  | 0 | 0  | 0  | 0  | 0 | 0 | 30 | 0 | 0 | 0 | 0  | 0  | 0  | 0 | 0 | 0 | 0 | 0 | 0 | 0  | 0 | 0 | 0 | 0 |
|                                                                                                                                                                                                                                                                                                                                                                                                                                                                                                                                                                                                                                                                                                                                                                                                                   | 0  | 0  | 0 | 0  | 0 | 0  | 0  | 0  | 0 | 0 | 0  | 0 | 0 | 0 | 0  | 0  | 0  | 0 | 0 | 0 | 0 | 0 | 0 | 16 | 0 | 0 | 0 | 0 |
|                                                                                                                                                                                                                                                                                                                                                                                                                                                                                                                                                                                                                                                                                                                                                                                                                   | 0  | 0  | 0 | 0  | 0 | 0  | 0  | 0  | 0 | 0 | 0  | 0 | 0 | 0 | 0  | 0  | 0  | 0 | 0 | 0 | 0 | 0 | 3 | 22 | 0 | 0 |   |   |
| M02255_77_000000000-ADUT3_1_1108_7010_16507 T---AC---GT-AG-GGG-----GCA-A-G-----C-G-T---T--AT-C-CGG-AT-----TT-A-C-T-GG-GT-----GT-A---AA-GG-GA-GC-----G-TA-G-A-C-G-----G--C-GA-G-G-C-----<br>AA---G-T-C-T-----G-A-T--G--TG--A-AA-AC--C-C-GG-G-G---CT-C-A-----A-C-C-CCG-T-G-A-C---T-G-C-A--T-T-----G--GA-A-A--C-----T-G-T-TT--T-G-C---T-T-G-A-G-T-G--C-CG---GA-G-A-----GGT-A--AG-C-----GG--A-ATT---C-C-T-<br>A-GT--GT-A-G-CG-GT-G---A-A-A--TG-C-GT-AG--AT-A-TT--A-G--G-A-G-G-A-AC-A-CC--AG--T-G--GC-GAA-G-G-C-G-----G-C-T-T-A---CTG-G--AC-G-G-----C-A--A-C-T-GA--CG-T-T-G-A-GG--C-T-CG-A-AA-G-C---G-TG--GG-G--<br>AG-C-A-AA-----CA--GG     Bacteria(100);Firmicutes(100);Clostridia(100);Clostridiales(100);Lachnospiraceae(100);Incertae_Sedis(90);unclassified(90);unclassified(90);unclassified(90);              |    |    |   |    |   |    |    |    |   |   |    |   |   |   |    |    |    |   |   |   |   |   |   |    |   |   |   |   |
| Otu0313                                                                                                                                                                                                                                                                                                                                                                                                                                                                                                                                                                                                                                                                                                                                                                                                           | 0  | 0  | 0 | 0  | 0 | 0  | 0  | 0  | 0 | 0 | 0  | 0 | 0 | 0 | 0  | 0  | 0  | 0 | 0 | 0 | 0 | 0 | 0 | 0  | 1 | 0 | 0 | 0 |
|                                                                                                                                                                                                                                                                                                                                                                                                                                                                                                                                                                                                                                                                                                                                                                                                                   | 0  | 28 | 0 | 10 | 0 | 0  | 0  | 0  | 0 | 4 | 0  | 1 | 0 | 0 | 76 | 30 | 28 | 0 | 0 | 0 | 0 | 0 | 0 | 0  | 0 | 0 | 0 | 0 |
|                                                                                                                                                                                                                                                                                                                                                                                                                                                                                                                                                                                                                                                                                                                                                                                                                   | 0  | 0  | 0 | 0  | 0 | 0  | 0  | 0  | 0 | 0 | 0  | 0 | 0 | 0 | 0  | 0  | 0  | 0 | 0 | 0 | 0 | 0 | 0 | 0  | 0 | 0 | 0 | 0 |
|                                                                                                                                                                                                                                                                                                                                                                                                                                                                                                                                                                                                                                                                                                                                                                                                                   | 18 | 0  | 0 | 0  | 0 | 0  | 0  | 0  | 0 | 0 | 0  | 0 | 0 | 0 | 0  | 0  | 0  | 0 | 0 | 0 | 0 | 0 | 0 | 0  | 0 | 0 |   |   |
| M02255_77_000000000                                                                                                                                                                                                                                                                                                                                                                                                                                                                                                                                                                                                                                                                                                                                                                                               |    |    |   |    |   |    |    |    |   |   |    |   |   |   |    |    |    |   |   |   |   |   |   |    |   |   |   |   |



|                                                                                                                                                                                                                                                                                                                                                                                                                                                                                                                                                                                                                                                                                                                                                                                                                               |   |     |   |    |   |     |    |     |    |   |    |    |    |     |    |    |   |    |   |    |    |   |    |    |   |     |   |   |
|-------------------------------------------------------------------------------------------------------------------------------------------------------------------------------------------------------------------------------------------------------------------------------------------------------------------------------------------------------------------------------------------------------------------------------------------------------------------------------------------------------------------------------------------------------------------------------------------------------------------------------------------------------------------------------------------------------------------------------------------------------------------------------------------------------------------------------|---|-----|---|----|---|-----|----|-----|----|---|----|----|----|-----|----|----|---|----|---|----|----|---|----|----|---|-----|---|---|
| Otu0315                                                                                                                                                                                                                                                                                                                                                                                                                                                                                                                                                                                                                                                                                                                                                                                                                       | 0 | 0   | 0 | 0  | 0 | 0   | 27 | 0   | 94 | 0 | 0  | 0  | 0  | 0   | 0  | 0  | 0 | 0  | 0 | 0  | 0  | 0 | 0  | 0  | 0 | 0   | 0 |   |
|                                                                                                                                                                                                                                                                                                                                                                                                                                                                                                                                                                                                                                                                                                                                                                                                                               | 0 | 0   | 0 | 0  | 0 | 0   | 0  | 0   | 0  | 0 | 0  | 0  | 0  | 0   | 0  | 0  | 0 | 0  | 0 | 0  | 0  | 0 | 0  | 0  | 0 | 0   |   |   |
|                                                                                                                                                                                                                                                                                                                                                                                                                                                                                                                                                                                                                                                                                                                                                                                                                               | 0 | 0   | 0 | 0  | 0 | 0   | 0  | 0   | 0  | 0 | 0  | 0  | 0  | 0   | 0  | 0  | 0 | 0  | 0 | 0  | 0  | 0 | 0  | 0  | 0 | 0   |   |   |
|                                                                                                                                                                                                                                                                                                                                                                                                                                                                                                                                                                                                                                                                                                                                                                                                                               | 0 | 0   | 0 | 0  | 0 | 0   | 0  | 0   | 0  | 0 | 0  | 0  | 0  | 0   | 0  | 0  | 0 | 0  | 0 | 0  | 0  | 0 | 0  | 28 | 0 | 9   |   |   |
| M02255_77_000000000-ADUT3_1_2107_16119_16504 T---AC---GT-AG-GGG-----GCA-A-G-----C-G-T---T-AT-C-CGG-AT-----TT-A-C-T--GG-GT-----GT-A----AA-GG-GA-GC-----G-TA-G-A-C-G-----G-C-AC-A-G-C-----AA---G-T-C-T-----G-A-A-G--TG--A-AA-TC--C-C-CG-G-G----CT-C-AA-----C-C-C-G-G-G-A--A-C---T-G--C-T---T-T-----G--GA-A-A--C-----T-G-T--TG--G-G-C---T-G-G-A-G-T--G---C-TG-----GA-G-A-----G-G-C-A--AG-C-----GG--A--ATT---C-C-T-A-GT--GT-A-G-CG-GT--G---A-A-A---TG-C-GT-AG--AT-A-TT--A-G--G-A-G-G-A-AC-A-CC---AG--T--G--GC-GAA-G--G-C--G-----G--C-T-T-G---CTG--G--AC-A-G-----T-A--A-C-T-GA--CG-T-T-G--A-GG--C-T-CG-A--AA-G-C---G-TG--GG-G--AG-C-A-AA-----CA--GG Bacteria(100);Firmicutes(100);Clostridia(100);Clostridiales(100);Lachnospiraceae(66);unclassified(66);unclassified(66);unclassified(66);unclassified(66);                      |   |     |   |    |   |     |    |     |    |   |    |    |    |     |    |    |   |    |   |    |    |   |    |    |   |     |   |   |
| Otu0316                                                                                                                                                                                                                                                                                                                                                                                                                                                                                                                                                                                                                                                                                                                                                                                                                       | 0 | 0   | 0 | 0  | 0 | 0   | 0  | 0   | 0  | 0 | 0  | 0  | 0  | 0   | 0  | 4  | 0 | 0  | 0 | 1  | 0  | 6 | 0  | 0  | 0 | 0   | 1 | 0 |
|                                                                                                                                                                                                                                                                                                                                                                                                                                                                                                                                                                                                                                                                                                                                                                                                                               | 0 | 0   | 0 | 0  | 0 | 0   | 0  | 0   | 0  | 0 | 0  | 0  | 0  | 0   | 0  | 0  | 0 | 0  | 0 | 0  | 0  | 0 | 0  | 0  | 0 | 0   | 0 |   |
|                                                                                                                                                                                                                                                                                                                                                                                                                                                                                                                                                                                                                                                                                                                                                                                                                               | 0 | 0   | 0 | 0  | 0 | 0   | 0  | 0   | 0  | 4 | 0  | 12 | 4  | 0   | 0  | 0  | 1 | 0  | 0 | 0  | 0  | 0 | 0  | 0  | 0 | 0   | 0 |   |
|                                                                                                                                                                                                                                                                                                                                                                                                                                                                                                                                                                                                                                                                                                                                                                                                                               | 0 | 0   | 0 | 0  | 0 | 0   | 0  | 0   | 0  | 3 | 0  | 1  | 0  | 0   | 0  | 0  | 0 | 0  | 0 | 0  | 0  | 0 | 0  | 0  | 0 | 0   | 0 |   |
| M02255_76_000000000-ADUNE_1_1105_5786_19038 C---TA--AC-TC-CGT-----GCC-A-G-----C--A-G---C--CG-C-GGT-AA-----TA-C--G-G--AG-GA-----TC--C-----AA-GC-GT--T-----A-TC-C-G-G-A-----A--T-CA-G-A-T-----AA---G-T-C-A-----G-T-G--G--TG--A-AA-GC--C-C-AT-C-G-----CT-C-AA-----C-G-G-T-G-G-A--A-C---G-G--C-C--A--T-----T-GA-T-A--C-----T-G-T--CT--G-A-C---T-T-G-A-A-T--T--A-TT-----AG-G-A-----A-G-T-A--AC-T-----AG--A--ATA---T-G-T-A-GT--GT-A-G-CG-GT--G---A-A-A---TG-C-TT-AG--AG-A-TT--A-C--A-T-G-G-A-AT-A-CC---AA--T--T--GC-GAA-G--G-C--A-----G--G-T-T-A--CTA--C--TA-A-T-----A-T--A-T-T-GA--CG-C-T-G--A-TG--G-A-CG-A--AA-G-C---G-TG--GG-T--AG-C-G-AA-----CA--GG Bacteria(100);Bacteroidetes(100);Flavobacteria(100);Flavobacteriales(100);Flavobacteriaceae(100);Flavobacterium(100);unclassified(100);unclassified(100);unclassified(100); |   |     |   |    |   |     |    |     |    |   |    |    |    |     |    |    |   |    |   |    |    |   |    |    |   |     |   |   |
| Otu0317                                                                                                                                                                                                                                                                                                                                                                                                                                                                                                                                                                                                                                                                                                                                                                                                                       | 0 | 199 | 0 | 0  | 0 | 0   | 0  | 0   | 0  | 0 | 0  | 0  | 0  | 0   | 0  | 0  | 0 | 0  | 0 | 0  | 0  | 0 | 0  | 0  | 0 | 0   | 0 |   |
|                                                                                                                                                                                                                                                                                                                                                                                                                                                                                                                                                                                                                                                                                                                                                                                                                               | 0 | 0   | 0 | 0  | 0 | 0   | 0  | 0   | 0  | 0 | 26 | 0  | 0  | 0   | 0  | 0  | 0 | 0  | 0 | 0  | 0  | 0 | 0  | 0  | 0 | 0   | 0 |   |
|                                                                                                                                                                                                                                                                                                                                                                                                                                                                                                                                                                                                                                                                                                                                                                                                                               | 0 | 0   | 0 | 0  | 0 | 0   | 0  | 0   | 0  | 0 | 0  | 0  | 0  | 0   | 0  | 18 | 0 | 0  | 0 | 0  | 0  | 0 | 61 | 0  | 0 | 0   | 0 |   |
|                                                                                                                                                                                                                                                                                                                                                                                                                                                                                                                                                                                                                                                                                                                                                                                                                               | 0 | 0   | 0 | 0  | 0 | 0   | 0  | 0   | 0  | 0 | 0  | 0  | 0  | 0   | 0  | 0  | 0 | 0  | 0 | 0  | 0  | 0 | 70 | 0  | 0 |     |   |   |
| M02255_77_000000000-ADUT3_1_1110_17804_19278 T---AC---GT-AT-GGT-----GCA-A-G-----C--G-T---T-AT-C-CGG-AT-----TT-A-C-T--GG-GT-----GT-A----AA-GG-GA-GC-----G-CA-G-G-C-G-----G--A-AG-G-C-T-----AA---G-T-C-T-----G-A-T--G--TG--A-AA-GC--C-C-GG-G-G----CT-C-AA-----C-C-C-C-G-G-T--A-C---T-G--C-A--T--T-----G--GA-A-A--C-----T-G-G--TC--A-T-C---T-A-G-A-G-T--G---T-CG-----GA-G-G-----G-G-T-A--AG-T-----GG--A--ATT---C-C-T-A-GT--GT-A-G-CG-GT--G---A-A-A---TG-C-GT-AG--AT-A-TT--A-G--G-A-G-G-A-AC-A-CC---AG--T--G--GC-GAA-G--G-C--G-----G--C-T-T-A---CTG--G--AC-G-A-----T-A---A-C-T-GA--CG-C-T-G--A-GG--C-T-CG-A--AA-G-C---G-TG--GG-G--AG-C-A-AA-----CA--GG Bacteria(100);Firmicutes(100);Clostridia(100);Clostridiales(100);Lachnospiraceae(100);Roseburia(100);unclassified(100);unclassified(100);unclassified(100);                |   |     |   |    |   |     |    |     |    |   |    |    |    |     |    |    |   |    |   |    |    |   |    |    |   |     |   |   |
| Otu0318                                                                                                                                                                                                                                                                                                                                                                                                                                                                                                                                                                                                                                                                                                                                                                                                                       | 0 | 0   | 0 | 92 | 0 | 114 | 24 | 107 | 0  | 0 | 0  | 0  | 0  | 0   | 0  | 0  | 0 | 0  | 0 | 0  | 0  | 0 | 0  | 0  | 0 | 0   | 5 |   |
|                                                                                                                                                                                                                                                                                                                                                                                                                                                                                                                                                                                                                                                                                                                                                                                                                               | 0 | 0   | 0 | 0  | 0 | 0   | 0  | 0   | 0  | 0 | 0  | 0  | 0  | 119 | 0  | 0  | 0 | 0  | 0 | 7  | 0  | 0 | 0  | 0  | 0 | 0   | 0 |   |
|                                                                                                                                                                                                                                                                                                                                                                                                                                                                                                                                                                                                                                                                                                                                                                                                                               | 0 | 0   | 0 | 0  | 0 | 0   | 0  | 0   | 1  | 0 | 0  | 1  | 0  | 0   | 3  | 0  | 0 | 0  | 0 | 15 | 0  | 0 | 0  | 0  | 0 | 14  | 0 |   |
|                                                                                                                                                                                                                                                                                                                                                                                                                                                                                                                                                                                                                                                                                                                                                                                                                               | 0 | 0   | 0 | 14 | 0 | 0   | 0  | 0   | 10 | 0 | 0  | 1  | 0  | 0   | 0  | 29 | 0 | 55 | 0 | 0  | 16 | 0 | 0  | 0  | 0 | 187 |   |   |
| M02255_76_000000000-ADUNE_1_1101_23285_18090 T---AC---GT-AG-GGG-----GCA-A-G-----C--G-T---T-AT-C-CGG-AT-----TT-A-C-T--GG-GT-----GT-A----AA-GG-GA-GC-----G-C---A-----G-----A---G-T-C-T-----G-A-A-G--TG--A-AA-TC--C-C-GA-G-G----CT-T-AA-----C-C-A-C-G-G-G--A-C---T-G--C-T---T-T-----G--GA-A-A--C-----T-G-T--GC--G-A-C---T-T-G-A-G-T--A---T-CG-----GA-G-G-----G-G-C-A--GG-C-----GG--A--ATT---C-C-T-A-GT--GT-A-G-CG-GT--G---A-A-A---TG-C-GT-AG--AT-A-TT--A-G--G-A-A-G-A-AC-A-CC---GG--T--G--GC-GAA-G--G-C--G-----G--C-C-T-G---CTG--G--AC-G-A-----A-A---A-C-T-GA--CG-T-T-G--A-GG--C-T-CG-A--AG-G-C---G-TG--GG-G--AG-C-A-AA-----CA--GG Bacteria(100);Firmicutes(100);Clostridia(100);Clostridiales(100);Lachnospiraceae(100);Moryella(100);unclassified(100);unclassified(100);unclassified(100);                                    |   |     |   |    |   |     |    |     |    |   |    |    |    |     |    |    |   |    |   |    |    |   |    |    |   |     |   |   |
| Otu0319                                                                                                                                                                                                                                                                                                                                                                                                                                                                                                                                                                                                                                                                                                                                                                                                                       | 0 | 0   | 0 | 0  | 0 | 0   | 0  | 0   | 0  | 0 | 0  | 0  | 0  | 0   | 0  | 0  | 0 | 0  | 0 | 0  | 0  | 0 | 0  | 0  | 0 | 0   | 8 |   |
|                                                                                                                                                                                                                                                                                                                                                                                                                                                                                                                                                                                                                                                                                                                                                                                                                               | 0 | 0   | 0 | 0  | 0 | 0   | 0  | 0   | 0  | 0 | 0  | 0  | 24 | 0   | 32 | 0  | 0 | 0  | 0 | 0  | 0  | 0 | 18 | 0  | 0 | 0   | 0 |   |
|                                                                                                                                                                                                                                                                                                                                                                                                                                                                                                                                                                                                                                                                                                                                                                                                                               | 0 | 0   | 0 | 0  | 0 | 0   | 0  | 0   | 0  | 0 | 0  | 0  | 0  | 0   | 0  | 0  | 0 | 1  | 0 | 0  | 3  | 0 | 0  | 0  | 0 | 235 | 1 |   |
|                                                                                                                                                                                                                                                                                                                                                                                                                                                                                                                                                                                                                                                                                                                                                                                                                               | 0 | 17  | 0 | 0  | 0 | 3   | 0  | 0   | 0  | 0 | 0  | 0  | 0  | 0   | 47 | 0  | 0 | 0  | 0 | 0  | 0  | 0 | 0  | 0  | 0 | 0   |   |   |
| M02255_77_000000000-ADUT3_1_1101_25329_3851 T---AC---GA-AG-GGG-----GCT-A-G-----C--G--T---T-GC-T-CGG-AA-----TT-A-C-T--GG-GC-----GT-A----AA-GG-GA-GC-----G-TA-G-G-C-G-----G--A-TA-G-TTT-----A---G-T-C-A-----G-A-G--G--TG--A-AA-GC--C-C-AG-G-G----CT-C-AA-----C-C-T-T-G-G-A--A-T---T-G--C-C---T-T-----T-GA-T-A--C-----T-G-G--CT--A-T-C---T-T-G-A-G-T--A---T-GG-----AA-G-A-----G-G-T-A--TG-T-----GG--A--ACT---C-C-G-A-GT--GT-A-G-AG-GT--G---A-A-A---TT-C-GT-AG--AT-A-TT--C-G--G-A-A-G-A-AC-A-CC---AG--T--G--GC-GAA-G--G-C--G-----A--C-A-T-A---CTG--G--TC-C-A-----T-T---A-C-T-GA--CG-C-T-G--A-GG--C-T-CG-A--AA-G-C---G-TG--GG-G--AG-C-A-AA-----CA--GG Bacteria(100);Proteobacteria(100);Alphaproteobacteria(100);Caulobacterales(100);Caulobacteraceae(100);unclassified(84);unclassified(84);unclassified(84);unclassified(84);   |   |     |   |    |   |     |    |     |    |   |    |    |    |     |    |    |   |    |   |    |    |   |    |    |   |     |   |   |



|         |                                                                                                                                                                                                                 |   |   |    |   |   |   |   |   |    |    |   |    |    |                                                                                                                                            |    |   |   |   |   |   |   |   |   |   |     |   |  |                                                                                                                                                                             |  |  |  |  |  |  |  |  |  |  |  |  |  |  |  |  |  |  |  |  |  |  |  |  |  |  |  |
|---------|-----------------------------------------------------------------------------------------------------------------------------------------------------------------------------------------------------------------|---|---|----|---|---|---|---|---|----|----|---|----|----|--------------------------------------------------------------------------------------------------------------------------------------------|----|---|---|---|---|---|---|---|---|---|-----|---|--|-----------------------------------------------------------------------------------------------------------------------------------------------------------------------------|--|--|--|--|--|--|--|--|--|--|--|--|--|--|--|--|--|--|--|--|--|--|--|--|--|--|--|
| Otu0320 | 0                                                                                                                                                                                                               | 0 | 0 | 0  | 0 | 0 | 0 | 0 | 0 | 0  | 0  | 0 | 0  | 0  | 0                                                                                                                                          | 0  | 0 | 0 | 0 | 0 | 0 | 0 | 0 | 0 | 0 | 0   | 0 |  |                                                                                                                                                                             |  |  |  |  |  |  |  |  |  |  |  |  |  |  |  |  |  |  |  |  |  |  |  |  |  |  |  |
|         | 0                                                                                                                                                                                                               | 0 | 0 | 0  | 0 | 0 | 0 | 0 | 0 | 0  | 0  | 0 | 15 | 0  | 0                                                                                                                                          | 0  | 0 | 0 | 0 | 0 | 0 | 0 | 0 | 0 | 0 | 0   | 0 |  |                                                                                                                                                                             |  |  |  |  |  |  |  |  |  |  |  |  |  |  |  |  |  |  |  |  |  |  |  |  |  |  |  |
|         | 0                                                                                                                                                                                                               | 0 | 0 | 0  | 0 | 0 | 0 | 7 | 0 | 0  | 0  | 0 | 0  | 0  | 0                                                                                                                                          | 0  | 0 | 0 | 0 | 0 | 0 | 0 | 0 | 0 | 0 | 0   | 0 |  |                                                                                                                                                                             |  |  |  |  |  |  |  |  |  |  |  |  |  |  |  |  |  |  |  |  |  |  |  |  |  |  |  |
|         | 0                                                                                                                                                                                                               | 0 | 0 | 26 | 0 | 0 | 0 | 0 | 0 | 0  | 0  | 0 | 0  | 0  | 0                                                                                                                                          | 0  | 0 | 0 | 0 | 0 | 0 | 0 | 0 | 0 | 0 | 0   | 0 |  |                                                                                                                                                                             |  |  |  |  |  |  |  |  |  |  |  |  |  |  |  |  |  |  |  |  |  |  |  |  |  |  |  |
|         | M02255_77_000000000-ADUT3_1_1107_22063_14190                                                                                                                                                                    |   |   |    |   |   |   |   |   |    |    |   |    |    | T---AC---GA-GG-GGG-----GCA-A-G-----C-G-T---T-GT-T-CGG-AA-----TT-A-T-T-GG-GC-----GT-A---AA-GG-GT-GC-----G-TA-G-G-C-G-----G-T-TT-G-G-C-----  |    |   |   |   |   |   |   |   |   |   |     |   |  |                                                                                                                                                                             |  |  |  |  |  |  |  |  |  |  |  |  |  |  |  |  |  |  |  |  |  |  |  |  |  |  |  |
|         | -----AA---G-T-C-T-----T-A-T-G-TG-A-AA-TC-T-T-CG-G-G----CT-C-AA-----C-C-C-G-A-A-G-T-C---T-G-C-A---T-G-----A-GA-A-A---C-----T-G-C-CG-G-G-C---T-T-G-A-G-T-A---T-GG-----GA-G-A-----G-G-T-G---AG-T-----GG-A-ATT----- |   |   |    |   |   |   |   |   |    |    |   |    |    |                                                                                                                                            |    |   |   |   |   |   |   |   |   |   |     |   |  |                                                                                                                                                                             |  |  |  |  |  |  |  |  |  |  |  |  |  |  |  |  |  |  |  |  |  |  |  |  |  |  |  |
|         | T-C-C-G-GT-GT-A-G-CG-GT-G---A-A-A---TG-C-GT-AG-AT-A-TC-G-G-A-A-G-G-A-AC-A-CC---TG-T-G-GC-GAA-A-G-C-G-----G-C-T-C-A---CTG-G-AC-C-A-----T-A---A-C-T-GA-CG-C-T-G-A-GG-C-A-CG-A-AA-G-C---T-AG-GG-G                  |   |   |    |   |   |   |   |   |    |    |   |    |    |                                                                                                                                            |    |   |   |   |   |   |   |   |   |   |     |   |  |                                                                                                                                                                             |  |  |  |  |  |  |  |  |  |  |  |  |  |  |  |  |  |  |  |  |  |  |  |  |  |  |  |
|         | G--AG-C-A-AA-----CA--GG                                                                                                                                                                                         |   |   |    |   |   |   |   |   |    |    |   |    |    |                                                                                                                                            |    |   |   |   |   |   |   |   |   |   |     |   |  | Bacteria(100);Acidobacteria(100);Acidobacteria(100);Acidobacteriales(100);Acidobacteriaceae(100);unclassified(69);unclassified(69);unclassified(69);unclassified(69);       |  |  |  |  |  |  |  |  |  |  |  |  |  |  |  |  |  |  |  |  |  |  |  |  |  |  |  |
| Otu0321 | 0                                                                                                                                                                                                               | 0 | 0 | 0  | 0 | 0 | 0 | 0 | 0 | 0  | 0  | 0 | 0  | 8  | 0                                                                                                                                          | 0  | 0 | 0 | 0 | 0 | 0 | 0 | 0 | 0 | 0 | 0   | 2 |  |                                                                                                                                                                             |  |  |  |  |  |  |  |  |  |  |  |  |  |  |  |  |  |  |  |  |  |  |  |  |  |  |  |
|         | 0                                                                                                                                                                                                               | 0 | 0 | 0  | 0 | 0 | 1 | 0 | 0 | 0  | 20 | 0 | 0  | 0  | 0                                                                                                                                          | 0  | 0 | 0 | 0 | 0 | 0 | 0 | 0 | 0 | 0 | 7   | 0 |  |                                                                                                                                                                             |  |  |  |  |  |  |  |  |  |  |  |  |  |  |  |  |  |  |  |  |  |  |  |  |  |  |  |
|         | 0                                                                                                                                                                                                               | 0 | 0 | 0  | 0 | 0 | 0 | 0 | 0 | 0  | 0  | 0 | 0  | 0  | 0                                                                                                                                          | 0  | 0 | 0 | 0 | 0 | 0 | 0 | 0 | 0 | 0 | 0   | 0 |  |                                                                                                                                                                             |  |  |  |  |  |  |  |  |  |  |  |  |  |  |  |  |  |  |  |  |  |  |  |  |  |  |  |
|         | 0                                                                                                                                                                                                               | 0 | 0 | 0  | 0 | 0 | 0 | 0 | 0 | 0  | 0  | 0 | 0  | 0  | 0                                                                                                                                          | 0  | 0 | 0 | 0 | 0 | 0 | 0 | 0 | 0 | 0 | 0   | 0 |  |                                                                                                                                                                             |  |  |  |  |  |  |  |  |  |  |  |  |  |  |  |  |  |  |  |  |  |  |  |  |  |  |  |
|         | M02255_77_000000000-ADUT3_1_1107_18324_15189                                                                                                                                                                    |   |   |    |   |   |   |   |   |    |    |   |    |    | T---AC---GA-AG-GGG-----GCT-A-G-----C-G-T---T-GT-T-CGG-AA-----TC-A-C-T-GG-GC-----GT--A---AA-GC-GC-AC-----G-TA-G-G-C-G-----G-A-TT-G-T-T----- |    |   |   |   |   |   |   |   |   |   |     |   |  |                                                                                                                                                                             |  |  |  |  |  |  |  |  |  |  |  |  |  |  |  |  |  |  |  |  |  |  |  |  |  |  |  |
|         | -----AA---G-T-C-G-----G-G-G-G-TG-A-AA-TC-C-T-GA-G-G----CT-C-AA-----C-C-T-C-A-G-A-A-C---T-G-C-C---T-T-----C-GA-T-A---C-----T-G-G-CG-A-T-C---T-T-G-A-G-T-C---C-GG---AA-G-A-----G-G-T-T--GG-T-----GG-A-ACA---G     |   |   |    |   |   |   |   |   |    |    |   |    |    |                                                                                                                                            |    |   |   |   |   |   |   |   |   |   |     |   |  |                                                                                                                                                                             |  |  |  |  |  |  |  |  |  |  |  |  |  |  |  |  |  |  |  |  |  |  |  |  |  |  |  |
|         | C-T-A-GT-GT-A-G-AG-GT-G---A-A-A---TT-C-GT-AG-AT-A-TT-A-G-C-T-A-G-A-AC-A-CC---AG--T-G-GC-GAA-G-G-C-G-----G-C-C-A-A---CTG-G-T-C-G-----G-T---A-C-T-GA-CG-C-T-G-A-GG--T-G-CG-A-AA-G-C---G-TG--GG-G                  |   |   |    |   |   |   |   |   |    |    |   |    |    |                                                                                                                                            |    |   |   |   |   |   |   |   |   |   |     |   |  |                                                                                                                                                                             |  |  |  |  |  |  |  |  |  |  |  |  |  |  |  |  |  |  |  |  |  |  |  |  |  |  |  |
|         | -AG-C-A-AA-----CA--GG                                                                                                                                                                                           |   |   |    |   |   |   |   |   |    |    |   |    |    |                                                                                                                                            |    |   |   |   |   |   |   |   |   |   |     |   |  | Bacteria(100);Proteobacteria(100);Alphaproteobacteria(100);Rhizobiales(100);Xanthobacteraceae(100);Labrys(100);unclassified(100);unclassified(100);unclassified(100);       |  |  |  |  |  |  |  |  |  |  |  |  |  |  |  |  |  |  |  |  |  |  |  |  |  |  |  |
| Otu0322 | 0                                                                                                                                                                                                               | 0 | 0 | 0  | 0 | 0 | 0 | 0 | 0 | 0  | 0  | 0 | 0  | 0  | 0                                                                                                                                          | 0  | 0 | 0 | 0 | 0 | 0 | 0 | 0 | 0 | 0 | 0   | 0 |  |                                                                                                                                                                             |  |  |  |  |  |  |  |  |  |  |  |  |  |  |  |  |  |  |  |  |  |  |  |  |  |  |  |
|         | 0                                                                                                                                                                                                               | 0 | 0 | 0  | 0 | 0 | 0 | 0 | 0 | 0  | 0  | 0 | 0  | 0  | 0                                                                                                                                          | 0  | 0 | 0 | 0 | 0 | 0 | 0 | 0 | 0 | 0 | 0   | 0 |  |                                                                                                                                                                             |  |  |  |  |  |  |  |  |  |  |  |  |  |  |  |  |  |  |  |  |  |  |  |  |  |  |  |
|         | 0                                                                                                                                                                                                               | 0 | 0 | 0  | 0 | 0 | 0 | 0 | 0 | 0  | 0  | 0 | 0  | 0  | 0                                                                                                                                          | 38 | 0 | 0 | 0 | 0 | 0 | 0 | 0 | 0 | 0 | 686 | 0 |  |                                                                                                                                                                             |  |  |  |  |  |  |  |  |  |  |  |  |  |  |  |  |  |  |  |  |  |  |  |  |  |  |  |
|         | 0                                                                                                                                                                                                               | 0 | 0 | 0  | 0 | 0 | 0 | 0 | 0 | 0  | 0  | 0 | 0  | 0  | 28                                                                                                                                         | 0  | 0 | 0 | 0 | 0 | 0 | 0 | 0 | 0 | 0 | 29  | 0 |  |                                                                                                                                                                             |  |  |  |  |  |  |  |  |  |  |  |  |  |  |  |  |  |  |  |  |  |  |  |  |  |  |  |
|         | M02255_77_000000000-ADUT3_1_1106_11798_14333                                                                                                                                                                    |   |   |    |   |   |   |   |   |    |    |   |    |    | T---AC---GA-AG-GGG-----GCT-A-G-----C-G-T---T-GC-T-CGG-AA-----TC-A-C-T-GG-GC-----GT--A---AA-GG-GC-GC-----G-TA-G-G-C-G-----G-C-GC-C-G-C----- |    |   |   |   |   |   |   |   |   |   |     |   |  |                                                                                                                                                                             |  |  |  |  |  |  |  |  |  |  |  |  |  |  |  |  |  |  |  |  |  |  |  |  |  |  |  |
|         | -----AA---G-T-C-G-----G-G-C-G-TG-A-AA-TC-C-C-CG-G-G----CT-C-AA-----C-C-C-G-G-G-G-G-C---T-G-C-G---C-C-----C-GA-G-A---C-----T-G-C-GG-T-G-C---T-C-G-A-G-G-G---C-GG---GA-G-A-----G-G-C-T--CG-C-----GG-A-ATT-----    |   |   |    |   |   |   |   |   |    |    |   |    |    |                                                                                                                                            |    |   |   |   |   |   |   |   |   |   |     |   |  |                                                                                                                                                                             |  |  |  |  |  |  |  |  |  |  |  |  |  |  |  |  |  |  |  |  |  |  |  |  |  |  |  |
|         | -C-C-C-A-GT-GT-A-G-AG-GT-G---A-A-A---TT-C-GT-AG-AT-A-TT-G-G-G-A-A-G-A-AC-A-CC---GG--T-G-GC-GAA-G-G-C-G-----G-C-G-A-G---CTG-G-CC-C-G-----T-T---T-C-T-GA-CG-C-T-G-A-GG--C-G-CG-A-CA-G-C---G-TG--GG-G              |   |   |    |   |   |   |   |   |    |    |   |    |    |                                                                                                                                            |    |   |   |   |   |   |   |   |   |   |     |   |  |                                                                                                                                                                             |  |  |  |  |  |  |  |  |  |  |  |  |  |  |  |  |  |  |  |  |  |  |  |  |  |  |  |
|         | GG-G--AG-C-A-AA-----CA--GG                                                                                                                                                                                      |   |   |    |   |   |   |   |   |    |    |   |    |    |                                                                                                                                            |    |   |   |   |   |   |   |   |   |   |     |   |  | Bacteria(100);Proteobacteria(100);Alphaproteobacteria(100);Rhodospirillales(100);unclassified(100);unclassified(100);unclassified(100);unclassified(100);unclassified(100); |  |  |  |  |  |  |  |  |  |  |  |  |  |  |  |  |  |  |  |  |  |  |  |  |  |  |  |
| Otu0323 | 0                                                                                                                                                                                                               | 0 | 0 | 0  | 0 | 0 | 0 | 0 | 0 | 0  | 0  | 0 | 0  | 0  | 0                                                                                                                                          | 0  | 0 | 0 | 0 | 0 | 0 | 0 | 0 | 0 | 0 | 0   | 0 |  |                                                                                                                                                                             |  |  |  |  |  |  |  |  |  |  |  |  |  |  |  |  |  |  |  |  |  |  |  |  |  |  |  |
|         | 0                                                                                                                                                                                                               | 0 | 0 | 0  | 0 | 0 | 0 | 0 | 0 | 0  | 0  | 0 | 0  | 0  | 0                                                                                                                                          | 0  | 0 | 0 | 0 | 0 | 0 | 0 | 0 | 0 | 0 | 0   | 0 |  |                                                                                                                                                                             |  |  |  |  |  |  |  |  |  |  |  |  |  |  |  |  |  |  |  |  |  |  |  |  |  |  |  |
|         | 0                                                                                                                                                                                                               | 0 | 0 | 0  | 0 | 0 | 0 | 0 | 0 | 0  | 0  | 0 | 0  | 24 | 0                                                                                                                                          | 0  | 0 | 0 | 0 | 0 | 0 | 0 | 0 | 0 | 0 | 0   | 0 |  |                                                                                                                                                                             |  |  |  |  |  |  |  |  |  |  |  |  |  |  |  |  |  |  |  |  |  |  |  |  |  |  |  |
|         | 0                                                                                                                                                                                                               | 0 | 0 | 0  | 0 | 0 | 0 | 0 | 0 | 21 | 0  | 0 | 28 | 0  | 0                                                                                                                                          | 0  |   |   |   |   |   |   |   |   |   |     |   |  |                                                                                                                                                                             |  |  |  |  |  |  |  |  |  |  |  |  |  |  |  |  |  |  |  |  |  |  |  |  |  |  |  |



|                                                                                                                                                                                                                    |   |    |     |    |   |    |    |     |    |    |    |     |   |    |   |   |    |   |     |    |    |   |    |    |   |   |   |
|--------------------------------------------------------------------------------------------------------------------------------------------------------------------------------------------------------------------|---|----|-----|----|---|----|----|-----|----|----|----|-----|---|----|---|---|----|---|-----|----|----|---|----|----|---|---|---|
| Otu0325                                                                                                                                                                                                            | 0 | 0  | 0   | 0  | 0 | 0  | 0  | 0   | 0  | 0  | 0  | 0   | 0 | 0  | 0 | 0 | 0  | 0 | 0   | 3  | 4  | 2 | 0  | 0  | 0 | 0 | 0 |
|                                                                                                                                                                                                                    | 0 | 0  | 1   | 0  | 0 | 39 | 0  | 0   | 0  | 62 | 2  | 0   | 0 | 0  | 0 | 0 | 0  | 0 | 0   | 0  | 0  | 0 | 0  | 0  | 0 | 0 |   |
|                                                                                                                                                                                                                    | 0 | 0  | 0   | 0  | 0 | 0  | 0  | 0   | 0  | 0  | 0  | 0   | 0 | 0  | 0 | 0 | 0  | 0 | 0   | 0  | 0  | 0 | 0  | 0  | 0 | 0 |   |
|                                                                                                                                                                                                                    | 0 | 0  | 0   | 0  | 0 | 0  | 0  | 0   | 0  | 0  | 0  | 0   | 0 | 0  | 0 | 0 | 0  | 0 | 0   | 0  | 0  | 0 | 0  | 0  | 0 | 0 |   |
| M02255_77_000000000-ADUT3_1_2104_6870_17085 T---AC---GG-AG-GGG-----GCT-A-G----C-G-T--T--GT-T-CGG-AA-----TT-A-C-T--GG-GC-----GT-A----AA-GC-GC-AC-----G-TA-G-G-C-G-----G-A-CC-A-T-C-----                             |   |    |     |    |   |    |    |     |    |    |    |     |   |    |   |   |    |   |     |    |    |   |    |    |   |   |   |
| AA---G-T-T-G-----G-G-G--G-TG--A-AA-TC--C-C-GG-G-G----CT-C-AA-----C-C-C-C-G-G-A-A-C---T-G--C-C--T-C-----C-AA-A-A--C-----T-G-C--TG--G-T-C---T-G-G-A-G-G-T--C-GA----GA-G-A-----G-G-T-G--AG-T-----GG--A--ATT---C-C-    |   |    |     |    |   |    |    |     |    |    |    |     |   |    |   |   |    |   |     |    |    |   |    |    |   |   |   |
| G-A-GT--GT-A-G-AG-GT--G---A-A-A---TT-C-GT-AG--AT-A-TT--C-G--G-A-G-G-A-AC-A-CC--AG--T-G--GC-GAA-G-G-C-G-----G-C-T-C-A---CTG-G--CT-C-G-----A-T---A-C-T--GA--CG-C-T-G--A-GG--T-G-CG-A-AA-G-C---G-TG--GG-G--           |   |    |     |    |   |    |    |     |    |    |    |     |   |    |   |   |    |   |     |    |    |   |    |    |   |   |   |
| AG-C-A-AA-----CA--GG Bacteria(100);Proteobacteria(100);Alphaproteobacteria(100);unclassified(60);unclassified(60);unclassified(60);unclassified(60);unclassified(60);unclassified(60);                             |   |    |     |    |   |    |    |     |    |    |    |     |   |    |   |   |    |   |     |    |    |   |    |    |   |   |   |
| Otu0326                                                                                                                                                                                                            | 0 | 58 | 132 | 0  | 0 | 0  | 80 | 101 | 63 | 0  | 0  | 0   | 0 | 0  | 0 | 0 | 0  | 0 | 0   | 0  | 0  | 0 | 0  | 0  | 0 | 0 |   |
|                                                                                                                                                                                                                    | 1 | 0  | 0   | 0  | 0 | 0  | 0  | 0   | 0  | 0  | 0  | 332 | 0 | 0  | 0 | 0 | 21 | 0 | 0   | 0  | 0  | 0 | 0  | 0  | 0 | 0 |   |
|                                                                                                                                                                                                                    | 0 | 0  | 6   | 0  | 0 | 0  | 0  | 0   | 0  | 0  | 0  | 0   | 0 | 0  | 2 | 0 | 0  | 0 | 0   | 0  | 0  | 0 | 0  | 6  | 0 | 0 |   |
|                                                                                                                                                                                                                    | 0 | 0  | 0   | 0  | 0 | 0  | 0  | 0   | 0  | 0  | 0  | 43  | 0 | 0  | 0 | 0 | 0  | 0 | 0   | 0  | 0  | 0 | 4  | 62 | 0 | 0 |   |
| M02255_77_000000000-ADUT3_1_1105_16676_21127 T---AC---GT-AT-GGT-----GCA-A-G----C-G-T--T--AT-C-CGG-AT-----TT-A-C-T--GG-GT-----GT-A----AA-GG-GA-GC-----G-TA-G-A-C-G-----G-A-TG-G-G-C-----                            |   |    |     |    |   |    |    |     |    |    |    |     |   |    |   |   |    |   |     |    |    |   |    |    |   |   |   |
| -----AA---G-T-C-T-----G-A-A-G--TG--A-AA-GC--C-C-GG-G-G----CT-C-AA-----C-C-C-C-G-G-G-A-C---T-G--C-T--T-T-----G--GA-A-A--C-----T-G-T--TC--A-T-C---T-G-G-A-G-T-G--C-TG---GA-G-A-----G-G-T-A--AG-T-----GG--A--ATT---C- |   |    |     |    |   |    |    |     |    |    |    |     |   |    |   |   |    |   |     |    |    |   |    |    |   |   |   |
| C-T-A-GT--GT-A-G-CG-GT--G---A-A-A---TG-C-GT-AG--AT-A-TT--A-G--G-A-G-G-A-AC-A-CC--AG--T-G--GC-GAA-G-G-C-G-----G-C-T-T-A---CTG-G--AC-A-G-----T-A---A-C-T--GA--CG-T-T-G--A-GG--C-T-CG-A-AA-G-C---G-TG--GG-G--         |   |    |     |    |   |    |    |     |    |    |    |     |   |    |   |   |    |   |     |    |    |   |    |    |   |   |   |
| -AG-C-A-AA-----CA--GG Bacteria(100);Firmicutes(100);Clostridia(100);Clostridiales(100);Lachnospiraceae(100);Incertae_Sedis(98);unclassified(98);unclassified(98);unclassified(98);                                 |   |    |     |    |   |    |    |     |    |    |    |     |   |    |   |   |    |   |     |    |    |   |    |    |   |   |   |
| Otu0327                                                                                                                                                                                                            | 0 | 0  | 0   | 36 | 0 | 0  | 0  | 0   | 0  | 0  | 0  | 0   | 0 | 0  | 0 | 0 | 0  | 0 | 0   | 0  | 0  | 0 | 3  | 0  | 0 | 0 |   |
|                                                                                                                                                                                                                    | 0 | 0  | 3   | 0  | 0 | 0  | 26 | 0   | 0  | 30 | 0  | 38  | 0 | 0  | 0 | 0 | 0  | 0 | 0   | 0  | 0  | 0 | 0  | 0  | 0 | 0 |   |
|                                                                                                                                                                                                                    | 0 | 0  | 0   | 7  | 0 | 0  | 0  | 0   | 3  | 0  | 0  | 0   | 0 | 0  | 0 | 0 | 0  | 0 | 0   | 0  | 0  | 0 | 0  | 0  | 0 | 0 |   |
|                                                                                                                                                                                                                    | 0 | 0  | 0   | 0  | 0 | 0  | 0  | 0   | 0  | 0  | 0  | 0   | 0 | 0  | 0 | 0 | 0  | 0 | 0   | 0  | 18 | 0 | 0  | 0  | 0 | 0 |   |
| M02255_77_000000000-ADUT3_1_1117_4386_19431 T---AC---GT-AG-GGT-----CCG-A-G----C-G-T--T--GT-C-CGG-AA-----TT-A-T-T--GG-GC-----GT-A----AA-GG-GC-TC-----G-TA-G-G-C-G-----G-T-TT-G-T-C-----GC-                          |   |    |     |    |   |    |    |     |    |    |    |     |   |    |   |   |    |   |     |    |    |   |    |    |   |   |   |
| --G-T-C-G-----G-G-A-G--TG--A-AA-AC--C-A-TG-A-G-----CT-T-AA-----C-T-C-A-T-G-G-C-T---T-G--C-T--T-C-----C-GA-T-A--C-----G--G-G-CA-G-A-C---T-A-G-A-G-G-T--A-TG---CA-G-G-----G-G-A-G--AA-T-----GG--A--ATT---C-C-T-G-    |   |    |     |    |   |    |    |     |    |    |    |     |   |    |   |   |    |   |     |    |    |   |    |    |   |   |   |
| GT--GT-A-G-CG-GT--G---A-A-A---TG-C-GC-AG--AT-A-TC--A-G--G-A-G-G-A-AC-A-CC--GG--T-G--GC-GAA-G-G-C-G-----G--T-T-C-T--CTG-G--GC-A-T-----T-A---C-C-T--GA--CG-C-T-G--A-GG--A-G-CG-A-AA-G-T---G-TG--GG-G--AG-            |   |    |     |    |   |    |    |     |    |    |    |     |   |    |   |   |    |   |     |    |    |   |    |    |   |   |   |
| C-G-AA-----CA--GG Bacteria(100);Actinobacteria(100);Actinobacteria(100);Actinobacteridae(100);Actinomycetales(100);Propionibacterineae(100);Nocardiodaceae(100);Nocardioides(100);unclassified(100);               |   |    |     |    |   |    |    |     |    |    |    |     |   |    |   |   |    |   |     |    |    |   |    |    |   |   |   |
| Otu0328                                                                                                                                                                                                            | 0 | 0  | 0   | 0  | 0 | 42 | 53 | 3   | 0  | 81 | 0  | 0   | 0 | 0  | 0 | 0 | 0  | 0 | 2   | 16 | 0  | 0 | 0  | 0  | 0 | 0 |   |
|                                                                                                                                                                                                                    | 0 | 1  | 0   | 0  | 0 | 0  | 0  | 0   | 37 | 2  | 40 | 0   | 0 | 0  | 0 | 0 | 1  | 0 | 0   | 0  | 0  | 0 | 0  | 0  | 0 | 0 |   |
|                                                                                                                                                                                                                    | 0 | 0  | 6   | 0  | 0 | 0  | 7  | 0   | 0  | 5  | 8  | 0   | 0 | 19 | 0 | 0 | 0  | 0 | 197 | 64 | 8  | 0 | 0  | 0  | 0 | 0 |   |
|                                                                                                                                                                                                                    | 0 | 0  | 68  | 22 | 0 | 0  | 15 | 0   | 0  | 28 | 0  | 13  | 7 | 0  | 0 | 0 | 0  | 0 | 0   | 0  | 0  | 0 | 37 | 0  | 0 | 0 |   |
| M02255_77_000000000-ADUT3_1_1107_25179_6365 T---AC---GT-AT-GGG-----GCG-A-G----C-G-T--T--GT-C-CGG-AA-----TT                                                                                                         |   |    |     |    |   |    |    |     |    |    |    |     |   |    |   |   |    |   |     |    |    |   |    |    |   |   |   |



Otu0330 0 0 0 0 0 0 0 0 0 0 0 0 0 0 0 0 0 0 0 0 0 0 0 0 0 0 0 0  
0 0 1 0 0 1 0 71 0 0 23 0 0 0 0 0 0 0 0 0 0 0 0 0 0 0 0 0 0  
0 0 0 0 0 0 0 0 0 0 0 0 0 0 0 0 23 10 0 0 0 0 0 0 0 0 0 0 0  
0 0 0 0 0 0 0 0 0 0 0 0 7 8 0 0 0 0 0 0 0 0 0 0 0 0 0 0 0  
M02255\_77\_000000000-ADUT3\_1\_1111\_5399\_15873 G---AC---GG-AG-GGT-----GCT-A-G-----C--G--T---T-GT-T-CGG-AA-----TC-A-C-T--GG-GC-----GT--A----AA-GG-GC-GC-----G-TA-G-G-C-G-----G--C-TG-T-G-G-----  
CA---G-T-C-G-----G-G-T-G--TG--A-AA-GC--C-C-GG-A-G-----CT-C-AA-----C-T-C-C-G-G-A-A-T---G-G-C-A---C-T-----C--GA-G-A---C-----G--C-C--AC--G-G-C---T-G-G-A-G-G--C---C-GG----AA-G-A-----G-G-A-G---GG-T-----GG--A--ATA---C-C-  
C-A-GT--GT-A-G-AG-GT--G---A-A-A---TT-C-GT-AG--AT-A-TT--G-G--G-T-G-G-A-AC-A-CC---GG--T--G--GC-GAA-A-G-C--G-----G--C-T-C-T---CTG--G--TC-C-G-----G-A---C-C-T--GA--CG-C-T-G--A-GG--C-G-CG-A--AA-G-C---G-T-G-GG-G--  
AG-C-A-AA-----CA--GG Bacteria(100);Proteobacteria(100);Alphaproteobacteria(100);unclassified(71);unclassified(71);unclassified(71);unclassified(71);unclassified(71);unclassified(71);

Otu0331 0 0 0 0 0 0 0 0 0 0 0 0 0 0 0 0 0 0 0 1 9 0 10 0 0 0 0 0 0  
1 0 0 0 0 0 0 0 0 0 0 0 0 0 0 0 0 0 0 0 0 0 0 0 0 0 0 0 0  
0 0 0 2 0 0 0 0 0 0 0 0 6 0 0 0 0 0 0 0 0 0 0 0 0 0 0 0 0  
0 0 0 0 0 0 0 0 0 0 0 0 0 0 4 0 0 0 0 0 0 0 0 0 0 0 0 0 0  
M02255\_76\_000000000-ADUNE\_1\_1117\_16171\_9739 C---TC---GC-AG-AAT-----AAG-CACC-----G--G--C---T--AACTCTGT-GC-----CA-G--C-A-GCC-GC-----GG--T-----AA-TA-CA-GA-----G-GG-T-G-C-A-----A--G-CT-G-T-T-----  
AA---G-T-C-G-----G-A-T-G--TG--A-AA-TC--C-C-TG-A-G-----CT-T-AA-----C-T-T-A-G-G-A-A-T---T-G--C-A---T-A-----C--GA-T-A---C-----T--G-G--GA--G-A-C---T-A-G-A-G-T-A---T-GG----GA-G-A-----G-G-A-T---GG-T-----AG--A--ATT---C-C-A-  
G-GT--GT-A-G-CG-GT--G---A--A-A---TG-C-GT-AG--AG-A-TC--T-G--G-A-G-G-A-AT-A-CC---GA--T--G--GC-GAA-G--G-C-A-----G--C-C-A-T---CTG--G--CC-T-A-----A-T---A-C-T--GA--CA-C-T-G--A-GG--T-A-CG-A--AA-G-C---A-TG--GG-G--  
AG-C-A-AA-----CA--GG Bacteria(100);Proteobacteria(100);Gammaproteobacteria(100);unclassified(79);unclassified(79);unclassified(79);unclassified(79);unclassified(79);unclassified(79);

Otu0332 0 0 0 157 0 0 0 0 0 0 0 0 1 0 0 0 0 0 0 5 0 0 0 0 5 0 1 2 0  
0 0 1 0 0 0 0 0 0 0 0 5 0 2 183 0 0 45 46 0 57 0 0 0 0 0 95 0 0 0  
0 48 0 0 0 0 0 0 0 0 0 0 0 15 42 0 0 119 0 0 0 0 0 0 0 0 0 0  
0 0 0 26 0 0 0 0 0 0 0 0 0 0 0 31 0 0 10 0 0 0 0 0 0 0 0 0  
M02255\_76\_000000000-ADUNE\_1\_2104\_25616\_14147 T---AC---GA-AG-GGG-----GCT-A-G-----C--G--T---T--GC-T-CGG-AA-----TT-A--C-T--GG-GC-----GT--A----AA-GG-GC-GC-----G-TA-G-G-C-G-----G--T-CA-T-T-T-----  
-----TA---G-T-C-A-----G-G-C--G--TG--A-AA-TT--C-C-CG-G-G-----CT-T-AA-----C-C-T-G-G-G-G--A-C---T-G--C-G---C-T-----T--GA-T-A---C-----T--G-G--GT--G-A-C---T-A-G-A-G-G--G---T-GG----AA-G-A-----G-G-G-T---CG-T-----GG--A--ATT---  
C-C-C-A-GT--GT-A-G-AG-GT--G---A--A-A---TT-C-GT-AG--AT-A-TT--G-G--G-A-A-G-A-AC-A-CC---GG--T--G--GC-GAA-G--G-C--G-----G--C-G-A-C---CTG--G--TC-C-A-----T-T---A-C-T--GA--CG-C-T-G--A-GG--C-G-CG-A--CA-G-C---G-TG--GG-  
G--AG-C-A-AA-----CA--GG Bacteria(100);Proteobacteria(100);Alphaproteobacteria(100);Rhodospirillales(100);Acetobacteraceae(100);unclassified(100);unclassified(100);unclassified(100);unclassified(100);

Otu0333 0 0 0 0 0 0 0 0 0 0 0 0 0 0 0 0 0 0 0 0 0 0 0 0 0 0 0 0  
0 0 0 0 0 0 0 0 0 0 0 0 0 0 0 14 0 0 0 0 0 0 0 12 0 0 0 0  
0 0 0 0 0 0 0 0 0 0 0 0 0 0 0 0 0 0 0 0 0 0 0 0 0 0 0 0  
0 37 0 0 0 0 0 0 0 0 0 0 0 0 0 0 0 0 0 0 0 0 0 0 0 0 0 0  
M02255\_77\_000000000-ADUT3\_1\_1109\_18228\_18719 T---AC---GT-AG-GGT-----GCG-A-G-----C--G--T---T--GT-T-CGG-AA-----TT-A--T-T--GG-GC-----GT--A----AA-GA-GC-TC-----G-TA-G-G-C-G-----G--T-TT-G-T-C-----  
-----GC---G-T-C-G-----G-C-C--G--TG--A-AA-AC--T-T-GG-G-G-----CT-T-AA-----C-T-C-C-A-A-G--C-T---T-G--C-G---G-T-----C--GA-T-A---C-----G--G-G--CA--G-A-C---T-T-G-A-G-T--T---C-GG----CA-G-G-----G-G-A-G---AC-T-----GG--A--ATT---C-  
C-T-G-GT--GT-A-G-CG-GT--G---A--A-A---TG-C-GC-AG--AT-A-TC--A-G--G-A-G-G-A-AC-A-CC---GG--T--G--GC-GAA-G--G-C--G-----G--G-T-C-T---CTG--G--GC-C-G-----A-C---A-C-T--GA--CG-C-T-G--A-GG--A-G-CG-A--AA-G-C---G-TG--GG-  
G--AG-C-G-AA-----CA--GG Bacteria(100);Actinobacteria(100);Actinobacteria(100);Actinobacteridae(100);Actinomycetales(100);Pseudonocardineae(59);unclassified;unclassified;unclassified;

Otu0334 0 0 0 0 0 0 0 0 0 0 0 0 0 0 0 0 0 0 0 0 0 0 0 0 0 0 0 0  
0 0 0 0 0 0 0 0 0 1 1 0 0 0 0 0 0 13 0 0 0 0 0 0 0 0 0 0  
0 0 0 0 0 0 0 0 0 0 0 0 0 0 0 0 0 0 0 0 0 0 0 28 0 0 0 0  
0 0 0 0 0 0 0 0 0 0 0 0 0 0 0 0 0 0 0 0 0 0 0 0 0 0 0  
M02255\_76\_000000000-ADUNE\_1\_1103\_21469\_4931 C---CG---GC-TA-ACT-----CCG-T-G-----C--C--A---G--CA-G-CCG-CG-----GT-A--A-T--AC-GG-----AG--G----GT-GC-AA-GC-----G-TT-GTC-C-G-----G--C-CA-T-T-T-----AA-  
---T-T-C-T-----G-G-G--G--TG--A-AA-GC--C-C-GT-T-G-----CT-C-AA-----C-A-A-C-G-G-A-A-C---T-G--C-C---C-T-----G--GA-A-A---C-----T--G-G--AT--G-G-C---T-T-G-A-G-T--A---C-AG----AC-G-A-----G-G-G-T---GG-C-----GG--A--ATG---G-A-T-G-  
CT--GT-A-G-CG-GT--G---A--A-A---TG-C-AT-AG--AT-A-GC--A-T--C-C-A-G-A-AC-C-CC---GA--T--T--GC-GAA-G--G-C-A-----G--C-T-G-C---CTA--G--AC-T-G-----T-A---A-C-T--GA--CG-C-T-G--A-GG--C-A-CG-A--AA-G-C---G-TG--GG-G--AG-C-  
G-AA-----CA--GG Bacteria(100);Bacteroidetes(100);Sphingobacteria(100);Sphingobacteriales(100);Cytophagaceae(100);Hymenobacter(100);unclassified(100);unclassified(100);unclassified(100);



|                                                                                                                                                                                                                        |   |   |     |     |    |   |     |     |     |     |     |   |    |   |   |    |     |     |    |   |   |   |    |     |     |    |   |   |
|------------------------------------------------------------------------------------------------------------------------------------------------------------------------------------------------------------------------|---|---|-----|-----|----|---|-----|-----|-----|-----|-----|---|----|---|---|----|-----|-----|----|---|---|---|----|-----|-----|----|---|---|
| Otu0335                                                                                                                                                                                                                | 0 | 0 | 0   | 24  | 0  | 0 | 0   | 0   | 0   | 0   | 0   | 0 | 0  | 0 | 0 | 0  | 0   | 0   | 0  | 0 | 1 | 0 | 0  | 0   | 0   | 0  | 0 |   |
|                                                                                                                                                                                                                        | 0 | 0 | 0   | 29  | 0  | 0 | 0   | 0   | 0   | 5   | 0   | 0 | 0  | 0 | 0 | 0  | 0   | 0   | 0  | 0 | 0 | 0 | 0  | 0   | 82  | 0  | 0 | 0 |
|                                                                                                                                                                                                                        | 0 | 0 | 0   | 0   | 0  | 0 | 0   | 0   | 0   | 0   | 0   | 0 | 0  | 0 | 0 | 0  | 0   | 0   | 0  | 0 | 0 | 0 | 0  | 0   | 0   | 0  | 0 |   |
|                                                                                                                                                                                                                        | 0 | 0 | 0   | 1   | 0  | 4 | 0   | 0   | 0   | 0   | 0   | 0 | 0  | 3 | 0 | 20 | 0   | 0   | 0  | 0 | 0 | 3 | 1  | 0   | 0   | 0  |   |   |
| M02255_77_000000000-ADUT3_1_2103_29097_16057 T---AC---GT-AG-GGT-----CCG-A-G-----C-G-T---T-GT-C-CGG-AA-----TT-A-T-T-GG-GC-----GT-A-----AA-GG-GC-TT-----G-TA-G-G-C-G-----G-T-CC-G-T-C-----                               |   |   |     |     |    |   |     |     |     |     |     |   |    |   |   |    |     |     |    |   |   |   |    |     |     |    |   |   |
| ----GC---G-T-C-A-----G-G-A-G-TG--A-AA-AC--T-C-GG-G-G----CT-T-AA-----C-C-C-C-G-A-G--C-C---T-G--C-T---T-T-----T-GA-T-A---C-----G-G-G--CG--G-A-C---T-A-G-A-G-G--G--A-TG----CA-G-G-----G-G-A-G---AA-C-----GG--A-ATT----    |   |   |     |     |    |   |     |     |     |     |     |   |    |   |   |    |     |     |    |   |   |   |    |     |     |    |   |   |
| C-C-T-G-GT--GG-A-G-CG-GT--G---G--A-A---TG-C-GC-AG--AT-A-TC--A-G--G-A-G-G-A-AC-A-CC--GG--T--G--GC-GAA-G--G-C--G-----G--T-T-C-T---CTG--G--GC-A-T-----T-A---C-C-T--GA--CG-C-T-G--A-GA--A-G-CG-A--AA-G-C---G-TG--          |   |   |     |     |    |   |     |     |     |     |     |   |    |   |   |    |     |     |    |   |   |   |    |     |     |    |   |   |
| GG-G--AG-C-A-AA-----CA--GG Bacteria(100);Actinobacteria(100);Actinobacteria(100);Actinobacteridae(100);Actinomycetales(100);Propionibacterineae(100);Propionibacteriaceae(100);Friedmanniella(100);unclassified(100);  |   |   |     |     |    |   |     |     |     |     |     |   |    |   |   |    |     |     |    |   |   |   |    |     |     |    |   |   |
| Otu0336                                                                                                                                                                                                                | 0 | 0 | 0   | 276 | 0  | 0 | 117 | 4   | 0   | 105 | 0   | 0 | 0  | 0 | 0 | 0  | 0   | 0   | 0  | 0 | 0 | 0 | 0  | 0   | 0   | 0  | 0 |   |
|                                                                                                                                                                                                                        | 0 | 0 | 0   | 0   | 0  | 0 | 0   | 0   | 0   | 0   | 40  | 0 | 0  | 0 | 0 | 37 | 0   | 0   | 0  | 0 | 0 | 0 | 0  | 0   | 0   | 0  | 0 |   |
|                                                                                                                                                                                                                        | 0 | 0 | 0   | 0   | 0  | 0 | 0   | 0   | 8   | 31  | 6   | 0 | 0  | 0 | 0 | 0  | 0   | 134 | 67 | 0 | 0 | 0 | 0  | 0   | 0   | 0  | 0 |   |
|                                                                                                                                                                                                                        | 0 | 0 | 0   | 0   | 24 | 0 | 0   | 0   | 0   | 0   | 0   | 0 | 0  | 0 | 0 | 0  | 0   | 0   | 0  | 0 | 6 | 0 | 25 | 0   | 93  |    |   |   |
| M02255_77_000000000-ADUT3_1_1107_26589_12742 T---AC---GT-AT-GGT-----GCG-A-G-----C-G-T---T-GT-C-CGG-AA-----TT-A-T-T-GG-GC-----GT-A-----AA-GG-GT-AC-----G-TA-G-G-C-G-----G-T-TA-A-A-C-----                               |   |   |     |     |    |   |     |     |     |     |     |   |    |   |   |    |     |     |    |   |   |   |    |     |     |    |   |   |
| -----AA---G-T-C-A-----G-A-T-G-TA--A-AA-AC--T-T-GA-G-G----CT-C-AA-----C-C-T-C-A-T-G-T-----A-G--C-A---T-T-----T-GA-A-A---C-----T-G-T-AT--A-A-C---T-T-G-A-G-T-A--G-TG----GA-G-A-----G-G-A-A--AG-T-----GG--A-ATT----C-     |   |   |     |     |    |   |     |     |     |     |     |   |    |   |   |    |     |     |    |   |   |   |    |     |     |    |   |   |
| C-T-A-GT--GT-A-G-CG-GT--G---A--A-A---TG-C-GT-AG--AT-A-TT--A-G--G-A-G-G-A-AT-A-CC--AG--T--A--GC-GAA-G--G-C--G-----A--C-T-T-T---CTG--G--AC-A-C-----A-A--A-C-T--GA--CG-C-T-G--A-GG--T-A-CG-A--AA-G-C---G-TG--GG-G-        |   |   |     |     |    |   |     |     |     |     |     |   |    |   |   |    |     |     |    |   |   |   |    |     |     |    |   |   |
| -AG-C-A-AA-----CA--GG Bacteria(100);Firmicutes(100);Clostridia(100);Clostridiales(100);Family_XI_Incertae_Sedis(76);unclassified(76);unclassified(76);unclassified(76);unclassified(76);                               |   |   |     |     |    |   |     |     |     |     |     |   |    |   |   |    |     |     |    |   |   |   |    |     |     |    |   |   |
| Otu0337                                                                                                                                                                                                                | 0 | 0 | 0   | 0   | 0  | 0 | 0   | 0   | 0   | 0   | 0   | 0 | 1  | 0 | 0 | 4  | 0   | 0   | 0  | 0 | 0 | 0 | 0  | 0   | 0   | 11 | 1 | 0 |
|                                                                                                                                                                                                                        | 0 | 0 | 1   | 0   | 0  | 0 | 0   | 0   | 0   | 7   | 3   | 0 | 0  | 0 | 0 | 0  | 0   | 2   | 0  | 0 | 0 | 0 | 0  | 0   | 0   | 28 | 1 |   |
|                                                                                                                                                                                                                        | 0 | 0 | 2   | 0   | 0  | 0 | 0   | 39  | 0   | 0   | 0   | 0 | 0  | 0 | 0 | 0  | 0   | 0   | 0  | 0 | 0 | 0 | 0  | 0   | 0   | 0  | 0 |   |
|                                                                                                                                                                                                                        | 0 | 0 | 0   | 0   | 0  | 1 | 0   | 0   | 0   | 1   | 0   | 0 | 0  | 0 | 0 | 0  | 0   | 0   | 0  | 0 | 0 | 0 | 0  | 0   | 0   | 0  |   |   |
| M02255_77_000000000-ADUT3_1_2116_24487_13915 G---AA--GC-AC-CGG-----CTA-A-C-----T--C--C---G-TG-C-CAG-CA-----GC-C--G-C--GG-TA-----AT--A-----CG-GA-GG-GT-----GCAA-GCGTT-A-----A--T-CG-GAA-T-                              |   |   |     |     |    |   |     |     |     |     |     |   |    |   |   |    |     |     |    |   |   |   |    |     |     |    |   |   |
| -----TA---C-T-T-A-----G-A-T-G-TG--A-AA-GC--C-C-CG-G-G----CT-C-AA-----C-C-T-G-G-G-A--A-T---T-G--C-A---T-T-----T-AA-A-A---C-----T-G-T-CC--A-G-C---T-A-G-A-G-T-C---T-TG----TA-G-A-----G-G-G-G---GG-T-----AG--A-ATT----    |   |   |     |     |    |   |     |     |     |     |     |   |    |   |   |    |     |     |    |   |   |   |    |     |     |    |   |   |
| C-C-A-G-GT--GT-A-G-CG-GT--G---A--A-A---TG-C-GT-AG--AG-A-TC--T-G--G-A-G-G-A-AT-A-CC--GG--T--G--GC-GAA-G--G-C--G-----G--C-C-C-C---CTG--G--AC-A-A-----A-G---A-C-T--GA--CG-C-T-C--A-GG--T-G-CG-A--AA-G-C---G-TG--          |   |   |     |     |    |   |     |     |     |     |     |   |    |   |   |    |     |     |    |   |   |   |    |     |     |    |   |   |
| GG-G--AG-C-A-AA-----CA--GG Bacteria(100);Proteobacteria(100);Gammaproteobacteria(100);unclassified(100);unclassified(100);unclassified(100);unclassified(100);unclassified(100);unclassified(100);                     |   |   |     |     |    |   |     |     |     |     |     |   |    |   |   |    |     |     |    |   |   |   |    |     |     |    |   |   |
| Otu0338                                                                                                                                                                                                                | 0 | 0 | 285 | 0   | 0  | 0 | 438 | 160 | 609 | 0   | 0   | 0 | 0  | 0 | 0 | 0  | 0   | 0   | 0  | 0 | 0 | 0 | 0  | 0   | 0   | 6  | 0 |   |
|                                                                                                                                                                                                                        | 0 | 0 | 0   | 0   | 72 | 0 | 0   | 0   | 0   | 0   | 341 | 1 | 11 | 0 | 0 | 0  | 0   | 36  | 0  | 0 | 0 | 0 | 0  | 0   | 0   | 0  | 0 |   |
|                                                                                                                                                                                                                        | 0 | 0 | 0   | 0   | 0  | 0 | 0   | 0   | 0   | 0   | 0   | 1 | 0  | 0 | 7 | 20 | 110 | 0   | 0  | 0 | 0 | 0 | 0  | 0   | 0   | 0  | 0 |   |
|                                                                                                                                                                                                                        | 0 | 0 | 0   | 22  | 0  | 0 | 35  | 0   | 0   | 0   | 221 | 0 | 65 | 0 | 0 | 0  | 0   | 0   | 0  | 0 | 0 | 0 | 7  | 243 | 777 | 0  |   |   |
| M02255_77_000000000-ADUT3_1_1101_22941_15729 A---AC---GT-AG-GGT-----GCA-A-G-----C-G-T---T-GT-C-CGG-AA-----TT-A-C-T--GG-GT-----GT-A-----AA-GG-GA-GC-----G-CA-G-G-C-G-----G--G-AA-G-A-C---                               |   |   |     |     |    |   |     |     |     |     |     |   |    |   |   |    |     |     |    |   |   |   |    |     |     |    |   |   |
| -----AA---G-T-T-G-----G-A-A--G--TG--A-AA-AC--C-A-TG-G-G----CT-C-AA-----C-C-C-A-T-G-A--A-T---T-G--C-T---T-T-----C-AA-A-A---C-----T-G-T-TT--T-T-C---T-T-G-A-G-T--A--G-TG----CA-G-A-----G-G-T-A--GA-T-----GG--A-ATT----C- |   |   |     |     |    |   |     |     |     |     |     |   |    |   |   |    |     |     |    |   |   |   |    |     |     |    |   |   |
| C-C-G-GT--GT-A-G-CG-GT--G---G--A-A---TG-C-GT-AG--AT-A-TC--G-G--G-A-G-G-A-AC-A-CC--AG--T--G--GC-GAA-G--G-C--G-----G--T-C-T-A---CTG--G--GC-A-C-----C-A--A-C-T--GA--CG-C-T-G--A-GG--C-T-CG-A--AA-G-C---A-TG--GG-          |   |   |     |     |    |   |     |     |     |     |     |   |    |   |   |    |     |     |    |   |   |   |    |     |     |    |   |   |
| T--AG-C-A-AA-----CA--GG Bacteria(100);Firmicutes(100);Clostridia(100);Clostridiales(100);Ruminococcaceae(100);Subdoligranulum(100);unclassified(100);unclassified(100);unclassified(100);                              |   |   |     |     |    |   |     |     |     |     |     |   |    |   |   |    |     |     |    |   |   |   |    |     |     |    |   |   |
| Otu0339                                                                                                                                                                                                                | 0 | 0 | 0   | 0   | 0  | 0 | 0   | 0   | 0   | 0   | 0   | 0 | 0  | 0 | 0 | 0  | 0   | 1   | 0  | 0 | 0 | 0 | 0  | 0   | 0   | 0  | 0 |   |
|                                                                                                                                                                                                                        | 0 | 0 | 0   | 0   | 0  | 0 | 0   | 0   | 0   | 0   | 0   | 0 | 0  | 0 | 0 | 0  | 0   | 0   | 0  | 0 | 0 | 0 | 0  | 0   | 5   | 4  | 0 |   |
|                                                                                                                                                                                                                        | 0 | 0 | 0   | 1   | 0  | 0 | 0   | 0   | 0   | 0   | 0   | 0 | 0  | 0 | 0 | 0  | 0   | 0   | 0  | 0 | 0 | 0 | 0  | 0   | 0   | 0  | 0 |   |
|                                                                                                                                                                                                                        | 0 | 0 | 0   | 0   | 0  | 1 | 0   | 0   | 0   | 2   | 0   | 1 | 0  | 0 | 0 | 0  | 0   | 0   | 0  | 0 | 0 | 0 | 0  | 0   | 0   | 0  |   |   |
| M02255_76_000000000-ADUNE_1_2110_7767_22329 T---AC---CG-AC-AGA-----ATA-A-G-----C---A--C--CG-G-CTA-AC-----TC-T--G-T--GC-CA-----GC--AG---CC-GC-GG-TA-----A-TA-C-A-G-A-----G--G-GT-G-C-A-----AG-                          |   |   |     |     |    |   |     |     |     |     |     |   |    |   |   |    |     |     |    |   |   |   |    |     |     |    |   |   |
| ---C-G-T-T-----A-A-T--C--GG--A-AA-TC--C-C-CG-G-G----CT-C-AA-----C-C-T-G-G-G-A--A-C---T-G--C-A---T-T-----C-AA-A-A---C-----T-G-A-CT--G-A-C---T-A-G-A-G-T--A--T-GG----TA-G-A-----G-G-G-T---GG-T-----GG--A-ATT----T-C-C-T- |   |   |     |     |    |   |     |     |     |     |     |   |    |   |   |    |     |     |    |   |   |   |    |     |     |    |   |   |
| GT--GT-A-G-CG-GT--G---A--A-A---TG-C-GT-AG--AT-A-TA--G-G--A-A-G-G-A-AC-A-CC--AG--T--G--GC-GAA-G--G-C--G-----A--C-C-A-C---CTG--G--AC-T-A-----A-T--A-C-T--GA--CA-C-T-G--A-GG--T-G-CG-A--AA-G-C---G-TG--GG-G--AG-          |   |   |     |     |    |   |     |     |     |     |     |   |    |   |   |    |     |     |    |   |   |   |    |     |     |    |   |   |
| C-A-AA-----CA--GG Bacteria(100);Proteobacteria(100);Gammaproteobacteria(100);unclassified(100);unclassified(100);unclassified(100);unclassified(100);unclassified(100);unclassified(100);                              |   |   |     |     |    |   |     |     |     |     |     |   |    |   |   |    |     |     |    |   |   |   |    |     |     |    |   |   |



|                                                                                                                                                                                                                                                                                                                                                                                                                                                                                                                                                                                                                                                                                                                                                                                                                                                        |   |   |    |   |   |    |    |   |     |    |   |   |   |    |     |    |    |   |    |   |   |    |    |    |    |   |    |   |
|--------------------------------------------------------------------------------------------------------------------------------------------------------------------------------------------------------------------------------------------------------------------------------------------------------------------------------------------------------------------------------------------------------------------------------------------------------------------------------------------------------------------------------------------------------------------------------------------------------------------------------------------------------------------------------------------------------------------------------------------------------------------------------------------------------------------------------------------------------|---|---|----|---|---|----|----|---|-----|----|---|---|---|----|-----|----|----|---|----|---|---|----|----|----|----|---|----|---|
| Otu0340                                                                                                                                                                                                                                                                                                                                                                                                                                                                                                                                                                                                                                                                                                                                                                                                                                                | 0 | 0 | 58 | 0 | 0 | 0  | 0  | 0 | 129 | 0  | 0 | 0 | 0 | 0  | 0   | 0  | 0  | 0 | 0  | 0 | 0 | 0  | 0  | 0  | 0  | 0 | 0  |   |
|                                                                                                                                                                                                                                                                                                                                                                                                                                                                                                                                                                                                                                                                                                                                                                                                                                                        | 0 | 0 | 0  | 0 | 0 | 0  | 0  | 0 | 0   | 0  | 0 | 0 | 0 | 0  | 96  | 0  | 0  | 0 | 0  | 0 | 0 | 0  | 0  | 0  | 0  | 0 | 0  |   |
|                                                                                                                                                                                                                                                                                                                                                                                                                                                                                                                                                                                                                                                                                                                                                                                                                                                        | 0 | 0 | 26 | 0 | 0 | 0  | 0  | 0 | 0   | 0  | 0 | 0 | 0 | 0  | 19  | 0  | 0  | 0 | 0  | 0 | 0 | 0  | 0  | 0  | 0  | 0 | 0  |   |
|                                                                                                                                                                                                                                                                                                                                                                                                                                                                                                                                                                                                                                                                                                                                                                                                                                                        | 0 | 0 | 0  | 0 | 0 | 0  | 14 | 0 | 56  | 0  | 0 | 0 | 0 | 0  | 0   | 0  | 0  | 0 | 0  | 0 | 0 | 13 | 0  | 0  | 0  | 0 |    |   |
| M02255_77_000000000-ADUT3_1_1105_7056_3043 T---AC---GT-AG-GGG-----GCG-A-G-----C--G--T--T--AT-C-CGG-AA-----TT-A--T-T--GG-GC-----GT--A----AA-GA-GT-GC-----G-TA-G-G-T-G-----G--C-AC-C-T-T-----AA-<br>---G-C-G-C-----A-G-G--G--TT--T-AA-GG--C-A-AT-G-G----CT-C-AA-----C-C-A-T-T-G-T--T-----C-G--C-C---T-T-----G--CG-A-A--C-----T-G-G--GG-T-G-C---T-T-G-A-G-T--G---C-AG-----GA-G-G-----G-G-A-A--AG-T-----GG--A--ATT----C-C-T-A-<br>GT--GT-A-G-CG-GT--G---A--A---TG-C-GT-AG--AT-A-TT--A-G--G-A-G-G-A-AC-A-CC---AG--T--G--GC-GAA-G--G-C-G-----A--C-T-T-T---CTG--G--AC-T-G-----T-T---A-C-T--GA--CA-C-T-G--A-GG--C-A-CG-A--AA-G-C---G-TG--GG-G--AG-C-<br>A-AA-----CA--GG Bacteria(100);Firmicutes(100);Clostridia(100);Clostridiales(100);Family_XIII_Incertae_Sedis(100);Eubacterium(100);unclassified(100);unclassified(100);unclassified(100);               |   |   |    |   |   |    |    |   |     |    |   |   |   |    |     |    |    |   |    |   |   |    |    |    |    |   |    |   |
| Otu0341                                                                                                                                                                                                                                                                                                                                                                                                                                                                                                                                                                                                                                                                                                                                                                                                                                                | 0 | 0 | 0  | 0 | 0 | 0  | 0  | 0 | 0   | 0  | 0 | 0 | 0 | 0  | 0   | 0  | 0  | 0 | 0  | 0 | 1 | 0  | 0  | 0  | 0  | 3 | 0  | 1 |
|                                                                                                                                                                                                                                                                                                                                                                                                                                                                                                                                                                                                                                                                                                                                                                                                                                                        | 0 | 0 | 1  | 0 | 0 | 25 | 0  | 0 | 0   | 62 | 0 | 0 | 0 | 0  | 39  | 0  | 0  | 0 | 0  | 0 | 0 | 0  | 0  | 18 | 0  | 0 | 54 | 0 |
|                                                                                                                                                                                                                                                                                                                                                                                                                                                                                                                                                                                                                                                                                                                                                                                                                                                        | 0 | 0 | 0  | 0 | 0 | 0  | 7  | 0 | 0   | 0  | 0 | 0 | 0 | 72 | 474 | 0  | 0  | 0 | 27 | 0 | 0 | 0  | 0  | 0  | 0  | 0 | 0  | 0 |
|                                                                                                                                                                                                                                                                                                                                                                                                                                                                                                                                                                                                                                                                                                                                                                                                                                                        | 0 | 0 | 0  | 6 | 0 | 0  | 4  | 0 | 0   | 35 | 0 | 0 | 7 | 0  | 1   | 25 | 0  | 0 | 0  | 0 | 0 | 0  | 20 | 0  | 15 | 0 | 0  |   |
| M02255_77_000000000-ADUT3_1_2118_13956_20608 T---AC---GT-AG-GGG-----GCA-A-G-----C--G--T--T--AT-C-CGG-AA-----TA-A--C-T--GG-GC-----GT--A----AA-GG-GT-GC-----G-CA-G-G-T-G-----G--T-TT-A-A-C-----<br>-----AA---G-T-T-A-----G-T-G--G--TG--A-AA-GG--C-A-TA-G-G----CT-C-AA-----C-C-A-A-T-G-T--A-----A-G--C-C--A--T-----T-AA-A-A--C-----T-G-T--TT-A-A-C---T-T-G-A-G-T--G---C-AG-----GA-G-A-----G-G-A-A--AG-T-----GG--A--ATT----C-<br>C-T-A-GT--GT-A-G-CG-GT--G---A--A---TG-C-GT-AG--AT-A-TT--A-G--G-A-G-G-A-AT-A-CC---AG--T--G--GC-GAA-G--G-C-G-----A--C-T-T-T---CTG--G--AC-T-G-----C-A---A-C-T--GA--CA-C-T-G--A-GG--C-A-CG-A--AA-G-C---G-TG--GG-G-<br>-AG-C-A-AA-----CA--GG Bacteria(100);Firmicutes(100);Clostridia(100);Clostridiales(100);Peptostreptococcaceae(100);Filifactor(100);unclassified(100);unclassified(100);unclassified(100);                |   |   |    |   |   |    |    |   |     |    |   |   |   |    |     |    |    |   |    |   |   |    |    |    |    |   |    |   |
| Otu0342                                                                                                                                                                                                                                                                                                                                                                                                                                                                                                                                                                                                                                                                                                                                                                                                                                                | 0 | 0 | 0  | 0 | 0 | 0  | 0  | 0 | 0   | 0  | 0 | 0 | 0 | 0  | 0   | 0  | 0  | 0 | 0  | 0 | 0 | 0  | 0  | 0  | 0  | 0 | 0  | 0 |
|                                                                                                                                                                                                                                                                                                                                                                                                                                                                                                                                                                                                                                                                                                                                                                                                                                                        | 0 | 0 | 0  | 0 | 0 | 0  | 83 | 0 | 0   | 0  | 0 | 0 | 0 | 0  | 0   | 0  | 0  | 0 | 0  | 0 | 0 | 0  | 0  | 0  | 0  | 0 | 0  | 0 |
|                                                                                                                                                                                                                                                                                                                                                                                                                                                                                                                                                                                                                                                                                                                                                                                                                                                        | 0 | 0 | 0  | 0 | 0 | 0  | 0  | 0 | 0   | 0  | 0 | 0 | 0 | 0  | 0   | 0  | 0  | 0 | 0  | 0 | 0 | 0  | 0  | 0  | 0  | 0 | 0  | 0 |
|                                                                                                                                                                                                                                                                                                                                                                                                                                                                                                                                                                                                                                                                                                                                                                                                                                                        | 0 | 0 | 0  | 0 | 0 | 0  | 0  | 0 | 0   | 0  | 0 | 0 | 0 | 0  | 0   | 0  | 0  | 0 | 0  | 0 | 0 | 0  | 0  | 0  | 0  | 0 | 0  | 0 |
| M02255_77_000000000-ADUT3_1_1106_17177_14272 T---AC---GT-AG-GTG-----GCA-A-G-----C--G--T--T--GT-C-CGG-AT-----TT-A--T-T--GG-GC-----GT--A----AA-GG-GC-GC-----G-CA-G-G-T-G-----G--T-TC-G-T-T-----<br>-----AA---G-T-C-C-----G-A-G--G--TG--A-AA-TC--T-C-CC-G-G----CT-C-AA-----C-T-G-G-G-A-G--G-----G-GT-C-T---T-C-----G--GA-T-A--C-----T-G-G--CG--G-A-C---T-T-G-A-G-G--A---G-AG-----CA-G-A-----G-G-T-G---AG-C-----GG--A--ATT----<br>C-T-C-G-GT--GT-A-G-TG-GT--G---A--A---TG-C-GT-AG--AT-A-TC--G-A--G-A-G-G-A-AC-A-CC---AG--C--G--GC-GAA-G--G-C-G-----G--C-T-C-A---CTG--G--GC-T-C-----C-A---C-C-T--GA--CA-C-T-G--A-GG--C-G-CG-A--AA-G-C---G-TG--<br>GG-G--AG-C-A-AA-----CC--GG Bacteria(100);unclassified(100);unclassified(100);unclassified(100);unclassified(100);unclassified(100);unclassified(100);unclassified(100);unclassified(100);                 |   |   |    |   |   |    |    |   |     |    |   |   |   |    |     |    |    |   |    |   |   |    |    |    |    |   |    |   |
| Otu0343                                                                                                                                                                                                                                                                                                                                                                                                                                                                                                                                                                                                                                                                                                                                                                                                                                                | 0 | 0 | 0  | 0 | 0 | 0  | 0  | 0 | 0   | 3  | 0 | 0 | 0 | 0  | 0   | 0  | 0  | 0 | 0  | 0 | 0 | 0  | 9  | 0  | 0  | 0 | 0  | 0 |
|                                                                                                                                                                                                                                                                                                                                                                                                                                                                                                                                                                                                                                                                                                                                                                                                                                                        | 0 | 0 | 0  | 0 | 0 | 20 | 0  | 0 | 0   | 0  | 0 | 0 | 7 | 0  | 0   | 7  | 0  | 0 | 0  | 0 | 0 | 1  | 0  | 0  | 0  | 0 | 13 | 0 |
|                                                                                                                                                                                                                                                                                                                                                                                                                                                                                                                                                                                                                                                                                                                                                                                                                                                        | 9 | 0 | 0  | 0 | 0 | 5  | 0  | 0 | 0   | 4  | 0 | 0 | 0 | 0  | 0   | 15 | 0  | 0 | 0  | 0 | 0 | 0  | 0  | 0  | 0  | 0 | 8  | 0 |
|                                                                                                                                                                                                                                                                                                                                                                                                                                                                                                                                                                                                                                                                                                                                                                                                                                                        | 0 | 9 | 0  | 2 | 0 | 0  | 1  | 0 | 0   | 0  | 0 | 0 | 0 | 0  | 0   | 24 | 10 | 0 | 0  | 0 | 0 | 0  | 0  | 0  | 0  | 0 | 0  | 0 |
| M02255_76_000000000-ADUNE_1_1118_23203_12189 .....AC---T-AC-GT-----GCC-A-G-----C--A--G---C--CG-C-GGT-AA-----TA-C--G-T--AG-GT-----GG--C---AA-GC-G--TT-----G---T-C-C-G-----G--A-TC-G-A-T-----<br>AA---G-T-C-T-----G-A-T--G--TG--A-AA-GC--C-T-TC-G-G----CT-C-AA-----C-C-G-G-A-G-A--A-T---T-G--C-A--T--C-----A--GA-A-A--C-----T-G-T--CG--A-G-C---T-T-G-A-G-T--A---C-AG-----AA-G-A-----G-G-A-G---AG-T-----GG--A--ACT----C-C-A-<br>T-GT--GT-A-G-CG-GT--G---A--A---TG-C-GT-AG--AT-A-TA--T-G--G-A-A-G-A-AC-A-CC---GG--T--G--GC-GAA-G--G-C-G-----G--C-T-C-T---CTG--G--TC-T-G-----T-T---A-C-T--GA--CG-C-T-G--A-GG--C-T-CG-A--AA-G-C---A-TG--GG-T--AG-<br>C-G-AA-----CA--GG Bacteria(100);Firmicutes(100);Bacilli(100);Lactobacillales(100);unclassified(100);unclassified(100);unclassified(100);unclassified(100);unclassified(100);                            |   |   |    |   |   |    |    |   |     |    |   |   |   |    |     |    |    |   |    |   |   |    |    |    |    |   |    |   |
| Otu0344                                                                                                                                                                                                                                                                                                                                                                                                                                                                                                                                                                                                                                                                                                                                                                                                                                                | 0 | 0 | 0  | 0 | 0 | 0  | 0  | 0 | 0   | 0  | 0 | 0 | 0 | 0  | 0   | 0  | 0  | 3 | 0  | 4 | 0 | 16 | 0  | 0  | 0  | 0 | 0  | 1 |
|                                                                                                                                                                                                                                                                                                                                                                                                                                                                                                                                                                                                                                                                                                                                                                                                                                                        | 1 | 0 | 0  | 0 | 0 | 0  | 0  | 0 | 0   | 0  | 0 | 0 | 0 | 0  | 0   | 0  | 0  | 0 | 0  | 0 | 0 | 0  | 0  | 0  | 0  | 0 | 0  | 0 |
|                                                                                                                                                                                                                                                                                                                                                                                                                                                                                                                                                                                                                                                                                                                                                                                                                                                        | 1 | 0 | 0  | 0 | 0 | 0  | 0  | 0 | 0   | 0  | 0 | 0 | 0 | 0  | 0   | 0  | 0  | 0 | 0  | 0 | 0 | 0  | 0  | 0  | 0  | 0 | 0  | 0 |
|                                                                                                                                                                                                                                                                                                                                                                                                                                                                                                                                                                                                                                                                                                                                                                                                                                                        | 0 | 0 | 0  | 0 | 0 | 0  | 0  | 6 | 0   | 0  | 0 | 0 | 0 | 0  | 0   | 0  | 0  | 0 | 0  | 0 | 0 | 0  | 0  | 0  | 0  | 0 | 0  | 0 |
| M02255_76_000000000-ADUNE_1_2114_27851_10656 TC---GC---AG-AA-TAA-----GCA-CCGG----C-----T---A--AC-T-CTG-TG-----CC-A--G-C--AG-CC-----GC--G----GT-AA-TA-CA-----G-AG-G-G-T-GC-----A--A-GC-G-T-T---<br>-----AA---G-T-C-G-----G-A-T--G--TG--A-AA-TC--C-C-TG-A-G----CT-T-AA-----C-T-T-A-G-G-A--A-T---T-G--C-A--T--A-----C--GA-T-A--C-----T--G-G--GA--G-A-C---T-A-G-A-G-T--A---T-GG-----GA-G-A-----G-G-A-T---GG-T-----AG--A--ATT----<br>C-C-A-G-GT--GT-A-G-CG-GT--G---A--A---TG-C-GT-AG--AG-A-TC--T-G--G-A-G-G-A-AT-A-CC---GA--T--G--GC-GAA-G--G-C-A-----G--C-C-A-T---CTG--G--CC-T-A-----A-T---A-C-T--GA--CA-C-T-G--A-GG--T-A-CG-A--AA-G-C---A-TG--GG-<br>G--AG-C-A-AA-----CA--GG Bacteria(100);Proteobacteria(100);Gammaproteobacteria(100);Pseudomonadales(100);Moraxellaceae(100);Acinetobacter(100);unclassified(100);unclassified(100);unclassified(100); |   |   |    |   |   |    |    |   |     |    |   |   |   |    |     |    |    |   |    |   |   |    |    |    |    |   |    |   |



Otu0345 0 0 0 0 0 0 0 0 0 0 0 0 0 0 0 0 0 0 0 0 0 0 0 0 0 0 0 0  
0 0 0 0 98 0 0 0 0 0 0 0 0 0 0 0 0 0 0 0 0 0 0 0 0 0 0 0 0  
0 0 0 0 0 0 5 0 0 0 0 0 0 0 0 0 13 0 0 0 0 0 0 0 0 0 0 0 0  
0 0 0 0 0 0 0 0 0 0 0 0 0 0 0 0 0 0 0 0 0 0 0 0 0 0 0 0  
M02255\_77\_000000000-ADUT3\_1\_2105\_9748\_9756 T---AC---GT-AG-GGG-----GCG-A-G-----C--G--T---T-GT-C-CGG-AA-----TC-A-T-T-GG-GC-----GT--A----AA-GG-GT-TC-----G-TA-G-G-C-G-----G--A-CT-G-A-T-----  
AA---G-T-C-A-----G-A-T-G-TG--A-AA-AG--A-T-GT-G-G----CT-T-AA-----C-C-A-T-G-T-T-A-----A-G-C-A---T-T-----T--GA-A-A---C-----T--G-T-CA-G-T-C---T-T-G-A-G-T--G---A-AG----GA-G-A-----G-G-T-A---AG-T-----GG--A--ATT----C-C-T-  
A-GT--GT-A-G-CG-GT--G---A--A---TG-C-GT-AG--AT-A-TT--A-G--G-A-G-G-A-AT-A-CC--AG--T--A--GC-GAA-G--G-C-G-----A--C-T-T-A---CTG--G--CC-T-T-----T-A--A-C-T-GA--CG-C-T-G--A-GG--A-A-CG-A-AA-G-C---G-TG--GG-T--AG-  
C-A-AA-----CA--GG Bacteria(100);Firmicutes(100);Clostridia(100);Clostridiales(100);unclassified(85);unclassified(85);unclassified(85);unclassified(85);unclassified(85);

Otu0346 0 0 0 0 0 0 0 0 0 0 0 0 0 0 0 0 0 0 0 0 3 10 0 0 0 0 0 0 0  
0 0 0 0 0 0 0 0 0 24 4 0 0 0 34 0 0 0 0 0 0 0 0 0 0 0 0 0  
0 0 0 0 0 0 0 0 0 0 0 0 0 0 0 0 0 22 0 0 0 0 0 0 0 0 0 0  
0 0 0 0 0 0 0 0 0 0 0 0 0 0 0 0 0 0 0 0 0 0 0 0 0 0 0  
M02255\_77\_000000000-ADUT3\_1\_1108\_27465\_19245 C---AC---GT-AG-GGG-----GCA-A-G-----C--G--T---T-GT-C-CGG-AT-----TT-A-T-T-GG-GC-----GT--A----AA-GA-GC-TC-----G-TA-G-G-T-G-----G--T-TC-G-G-T-----  
-----AA---G-T-C-G-----G-G-T-G-TG--A-AA-AC--T-C-TG-G-G----CT-C-AA-----C-T-C-A-G-A-G-A-----C-G-CC-A--C-C-----C--GA-T-A---C-----T--G-C-TG-TG-A-C---T-T-G-A-G-T--C---T-GG-----TA-G-G-----G-G-A-G---TG-T-----GG--A--ATT---  
C-C-C-A-GT--GT-A-G-CG-GT--G---A--A---TG-C-GC-AG--AT-A-TT--G-G--G-A-G-G-A-AC-A-CC--AG--T--G--GC-GAA-G--G-C-G-----G--C-A-C-T---CTG--G--GC-C-A-----G-T--A-C-T-GA--CA-C-T-G--A-GG--A-G-CG-A-AA-G-C---G-TG--  
GG-T--AG-C-G-AA-----CA--GG Bacteria(100);Actinobacteria(65);Actinobacteria(65);Acidimicrobidae(65);Acidimicrobiales(65);Acidimicrobinaeae(65);unclassified;unclassified;unclassified;

Otu0347 0 0 0 0 0 0 20 0 0 0 0 0 0 0 0 0 0 0 0 0 0 0 0 0 0 0 0 0  
0 0 0 0 0 0 0 0 0 0 0 0 0 0 0 0 21 0 0 0 0 0 0 0 0 0 0  
0 0 0 0 0 0 0 0 0 0 0 0 0 0 0 0 9 0 0 0 0 0 0 0 0 0 0  
9 0 0 0 0 0 0 0 0 0 0 0 0 0 0 0 0 0 0 0 0 16 0 0 0 0 0  
M02255\_77\_000000000-ADUT3\_1\_1117\_6943\_18178 T---AC---GT-AG-GGG-----TCG-A-G-----C--G--T---T-GT-C-CGG-AG-----TT-A-C-T-GG-GC-----GT--A----AA-GC-GC-AT-----G-CA-G-G-C-G-----G--C-TC-A-T-T-----AC-  
---G-C-A-T-----G-G-C-G--TG--A-AA-GC--C-C-CC-G-G----CT-T-AA-----C-C-G-G-G-G-A-G-G---G-T--C-G---T-C-----G--TG-A-A---C-----G--G-G--TG--A-G-C---T-T-G-A-G-G-G---T-AT-----CA-G-G-----G-G-C-T---GG-T-----AG--A--ATT----C-C-C-G-  
GT--GT-A-G-TG-GT--G---A--A---TG-C-GT-AG--AT-A-TC--G-G--G-A-G-G-A-AT-A-CC--TG--T--G--GC-GAA-G--G-C-G-----G--C-C-A-G---CTG--G--GA-T-A-----C-A---C-C-T-GA--CG-C-T-G--A-GA--T-G-CG-A--AG-G-C---G-TG--GG-G--AG-  
C-G-AA-----CG--GG Bacteria(100);Chloroflexi(100);Thermomicrobia(100);JG30-KF-CM45(100);unclassified(100);unclassified(100);unclassified(100);unclassified(100);unclassified(100);

Otu0348 0 0 0 0 0 0 0 0 0 0 0 0 0 0 0 0 0 0 0 0 1 3 6 0 0 0 0 0 0  
0 2 5 0 0 0 0 0 0 31 1 0 0 0 0 0 0 0 0 0 0 0 0 0 0 0 0 0  
0 0 0 0 0 8 0 0 0 4 0 0 0 0 0 0 0 0 0 30 0 0 1 0 0 0 0 0  
124 0 0 0 0 771 0 83 3 0 0 418 0 0 2 0 0 0 0 0 0 0 0 0 0 0 0  
M02255\_77\_000000000-ADUT3\_1\_1113\_8236\_20090 T---AC---GT-AT-GTC-----GCA-A-G-----C--G--T---T-AT-C-CGG-AT-----TT-A-T-T-GG-GC-----GT--A----AA-GC-GC-GT-----C-TA-G-G-C-G-----G--T-CT-G-G-T-----AA---  
-G-T-C-T-----G-A-T-G--TG--A-AA-AT--G-C-GG-G-G----CT-C-AA-----C-T-C-C-G-T-A-T-----T-G--C-G---T-T-----G--GA-A-A---C-----T--G-C-CA-G-A-C---T-A-G-A-G-T--A---C-TG-----GA-G-A-----G-G-T-G---GG-C-----GG--A--ACT----A-C-A-A-GT-  
-GT-A-G-AG-GT--G---A--A---TT-C-GT-AG--AT-A-TT--T-G--T-A-G-G-A-AT-G-CC--GA--T--A--GA-GAA-G--T-C-A-----G--C-T-C-A---CTG--G--AC-A-G-----A-T--A-C-T-GA--CG-C-T-G--A-AG--C-G-CG-A-AA-G-C---A-TG--GG-G--AG-C-A-  
AA-----CA--GG Bacteria(100);Fusobacteria(100);Fusobacteria(100);Fusobacteriales(100);Fusobacteriaceae(100);unclassified(100);unclassified(100);unclassified(100);unclassified(100);

Otu0349 0 0 0 0 0 0 0 0 0 0 0 0 0 0 0 0 0 0 0 0 0 0 0 0 0 0 0 0  
0 0 0 0 0 0 0 0 0 0 0 0 0 0 0 0 0 0 0 0 0 0 0 0 0 0 0 0  
0 0 0 0 0 0 0 0 0 0 0 0 0 0 0 0 26 0 0 0 0 0 0 0 0 0 0  
9 0 0 0 0 0 0 0 0 0 0 0 0 0 0 16 0 0 0 0 0 0 0 0 0 0  
M02255\_77\_000000000-ADUT3\_1\_1115\_6185\_11159 T---AC---GT-AG-GCA-----GCG-A-G-----C--G--T---T-GT-T-CGG-AG-----TT-A-C-T-GG-GC-----GT--A----AA-GG-GT-GT-----G-TA-G-G-C-G-----G--T-TG-T-T-T-----AA-  
---G-T-T-T-----G-G-T-G--TG--A-AA-TC--T-C-CC-G-G----CT-C-AA-----C-T-G-G-G-A-G-G-G---T-G--C-G---C-C-----G--AA-T-A---C-----T--G-A-AT--G-A-C---T-A-G-A-G-T--G---C-GG-----GA-G-A-----G-G-A-G---AG-T-----GG--A--ATT----C-C-T-G-  
GT--GT-A-G-CG-GT--G---A--A---TG-C-GT-AG--AT-A-TC--A-G--G-A-G-G-A-AC-A-CC--GG--T--G--GT-GTA-G--A-C-G-----G--C-T-C-T---CTG--G--AC-C-G-----T-A--A-C-T-GA--CG-C-T-G--A-GA--C-A-CG-A-AA-G-C---G-TG--GG-T--AG-C-  
A-AA-----CA--GG Bacteria(100);Acidobacteria(100);Acidobacteria(100);Acidobacteriales(100);Acidobacteriaceae(100);unclassified(69);unclassified(69);unclassified(69);unclassified(69);



Otu0350 0 0 1 0 0 0 0 0 0 0 21 1 7 0 0 0 0 0 0 0 0 0 0 1 0 0 2 2 0  
22 0 0 0 0 0 0 0 0 0 0 0 0 0 0 0 4 0 0 0 0 0 0 0 0 0 0  
0 0 0 0 0 0 0 0 0 0 0 0 0 0 0 0 0 0 0 0 4 1 0 0 0 0 0  
3 0 0 0 0 0 3 0 2 9 1 0 0 1 0 0 0 0 9 0 1 3 4 18 0 0 0  
M02255\_77\_000000000-ADUT3\_1\_2107\_27764\_19886 T---AC--AG-AG-GGT-----GCA-A-G-----C-G-T--T--AA-T-CGG-AA-----TT-A-----C-----T-----G-G-GC-----G-TA-G-G-T-G-----G--C-TT-G-A-T-----  
AA---G-T-C-A-----G-A-T--G-TG--A-AA-TC--C-C-CG-G-G-----CT-T-AA-----C-C-T-G-G-G-A--A-C---T-G--C-A--T--C-----T--GA-T-A--C-----T--G-T--TA--G-G-C---T-A-G-A-A-T-A--G-GT----GA-G-A-----G-G-A-A--GG-T----AG--A--ATT---C-C-A-  
G-GT--GT-A-G-CG-GT--G---A--A--TG-C-GT-AG--AG-A-TC--T-G--G-A-G-G-A-AT-A-CC--GA--T--G--GC-GAA-G--G-C-A-----G--C-C-T-T---CTG--G--CA-T-C-----A-T---A-T-T--GA--CA-C-T-G--A-GG--T-T-CG-A--AA-G-C---G-TG--GG-T--AG-  
C-A-AA-----CA--GG Bacteria(100);Proteobacteria(100);Gammaproteobacteria(100);Pseudomonadales(100);Moraxellaceae(100);Psychrobacter(100);unclassified(100);unclassified(100);unclassified(100);

Otu0351 0 0 0 0 0 0 0 0 0 0 0 0 0 0 0 0 0 0 0 0 0 0 0 0 0 0 0 0  
0 0 5 0 0 0 0 0 0 0 139 0 0 0 0 0 0 0 0 0 0 0 0 14 0 0 0 0  
0 0 0 0 0 0 0 0 0 0 0 0 0 0 0 0 0 0 0 0 0 0 0 0 0 0 0  
0 0 0 0 0 0 0 0 0 0 0 0 0 0 0 0 0 0 0 0 0 0 0 0 0 0 0  
M02255\_77\_000000000-ADUT3\_1\_1114\_22460\_19846 T---AC--GG-AG-GGG-----GCT-A-G-----C-G-T--T--GT-T-CGG-AA-----TT-A--C-T--GG-GC-----GT-A---AA-GG-GC-AC-----G-TA-G-G-C-G-----G--G-CT-G-T-T---  
-----AA---G-T-C-G-----G-G-G-G-TG--A-AA-TC--C-T-GA-G-G-----CT-C-AA-----C-C-T-C-A-G-A--A-T---T-G--C-C---T-T-----C--GA-T-A--C-----T--G-G--CG--G-T-C---T-T-G-A-G-T-G---C-GG----GA-G-A-----G-G-T-G--AG-T----GG--A--ATT---  
C-C-C-A-GT--GT-A-G-AG-GT--G---A--A--TT-C-GT-AG--AT-A-TT--G-G--G-A-A-G-A-AC-A-CC--AG--T--G--GC-GAA-G--G-C-G-----G--C-T-C-A--CTG--G--CC-C-G-----C-A--A-C-T--GA--CG-C-T-G--A-GG--T-G-CG-A--AA-G-C---G-TG--GG-  
G--AG-C-A-AA-----CA--GG Bacteria(100);Proteobacteria(100);Alphaproteobacteria(100);unclassified(100);unclassified(100);unclassified(100);unclassified(100);unclassified(100);unclassified(100);

Otu0352 0 0 0 0 0 0 0 0 0 0 0 0 0 0 0 0 0 0 0 0 0 0 0 0 0 0 0 0  
0 0 0 0 0 0 0 0 0 0 0 0 0 0 0 0 0 0 0 0 0 0 0 0 0 0 0  
0 0 0 0 0 0 0 0 0 0 0 0 0 93 61 0 0 0 0 0 0 0 0 0 0 0 0  
0 0 0 0 0 0 0 0 0 0 0 0 0 0 0 0 0 0 0 0 0 0 0 0 0 0  
M02255\_77\_000000000-ADUT3\_1\_1104\_7574\_20611 T---AA--GC-AC-CGG-----CTA-A-C-----T-A-C--G--TG-C-CAG-CA-----GC-C--G-C--GG-TA-----AT-A---CG-TA-GG-GT-----G-CG-A-G-C-G-----T--TAAT-C-G-G-----  
AAT---T-A-C-T-----G-A-T--G-TG--A-AA-TC--C-C-CG-G-G-----CT-C-AA-----C-C-T-G-G-G-A--A-C---T-G--C-A--T--T-----G--GT-G-A--C-----T--G-C--GA--A-A-C---T-G-G-A-G-T-G---C-GG----CA-G-A-----G-G-G-A--GA-T----GG--A--ATT---C-C-  
G-C-GT--GT-A-G-CA-GT--G---A--A--TG-C-GT-AG--AT-A-TG--C-G--G-A-G-G-A-AC-A-CC--GA--T--G--GC-GAA-G--G-C-A-----G--T-C-T-C---CTG--G--GC-C-T-----G-C---A-C-T--GA--CG-C-T-C--A-TG--C-A-CG-A--AA-G-C---G-TG--GG-G--  
AG-C-A-AA-----CA--GG Bacteria(100);Proteobacteria(100);Betaproteobacteria(100);Burkholderiales(81);unclassified(81);unclassified(81);unclassified(81);unclassified(81);unclassified(81);

Otu0353 59 0 29 0 0 0 0 0 0 0 0 0 0 0 0 0 0 0 2 0 0 0 0 0 0 0 0  
0 0 1 0 0 15 0 0 0 0 16 13 0 0 0 0 0 0 13 0 0 0 0 0 0 0 0  
0 0 0 0 0 1 0 0 0 0 0 0 0 0 0 0 27 0 0 0 0 0 0 0 0 0 20 0  
22 0 0 0 0 0 0 0 0 0 0 0 1 45 0 37 0 85 0 0 0 54 5 0 17 0 0  
M02255\_77\_000000000-ADUT3\_1\_2118\_18518\_8232 T---AC--GT-AG-GGT-----GCG-A-G-----C-G--T--T--GT-C-CGG-AA-----TT-A--C-T--GG-GC-----GT-A---AA-GA-GC-TC-----G-TA-G-G-C-G-----G--T-TT-G-T-C-----AC-  
---G-T-C-G-----T-C-T--G--TG--A-AA-TC--C-T-CC-A-G-----CT-T-AA-----C-T-G-G-G-G-G--C-G---T-G--C-A--G-G-----C--GA-T-A--C-----G--G-G--CA--G-A-C---T-T-G-A-G-T-A--C-TA-----CA-G-G-----G-G-A-G--AC-T----GG--A--ATT---C-C-T-G-  
GT--GT-A-G-CG-GT--G---A--A--TG-C-GC-AG--AT-A-TC--A-G--G-A-G-G-A-AC-A-CC--GG--T--G--GC-GAA-G--G-C-G-----G--G-T-C-T---CTG--G--GT-A-G-----T-A---A-C-T--GA--CG-C-T-G--A-GG--A-G-CG-A--AA-G-C---A-TG--GG-T--AG-  
C-G-AA-----CA--GG Bacteria(100);Actinobacteria(100);Actinobacteria(100);Actinobacteridae(100);Actinomycetales(100);Corynebacterineae(100);Dietziaceae(89);Dietzia(89);unclassified(89);

Otu0354 155 0 0 0 0 0 0 0 0 0 0 0 0 0 0 0 0 0 0 0 0 0 0 0 0 0 0  
1 0 0 0 0 0 0 0 0 0 0 0 0 14 0 0 0 0 0 0 0 0 0 0 0 0 0  
0 0 0 0 0 0 0 0 0 0 0 0 0 0 0 0 0 0 0 0 0 0 0 0 0 0 0  
0 121 0 0 0 0 0 0 0 0 0 0 0 0 0 0 0 0 0 0 0 0 0 0 0 0 0  
M02255\_76\_000000000-ADUNE\_1\_1107\_9731\_10210 T---AC--GT-AG-GGA-----CCA-A-G-----C-G--T--T--GT-T-CGG-AT-----TT-A--C-T--GG-GC-----GT-A---AA-----G---G-G-C-----G--C-G-G-T-----AA---G-T-  
C-A-----C-T-T--G--TG--A-AA-TC--T-C-TG-A-G-----CT-T-AA-----C-T-C-A-G-A-A--C-G---G-C--C-A--A-G-----T--GA-T-A--C-----T--G-C--AG--T-G-C---T-A-G-A-G-T-G---T-GG----AA-G-G-----G-G-C-A--AT-C-----GG--A--ATT---C-T-T-G-GT--GT-  
A-G-CG-GT--G---A--A--TG-C-GT-AG--AT-A-TC--A-A--G-A-G-G-A-AC-A-CC--TG--A--G--GT-GAA-G--A-C-G-----G--G-T-T-G---CTG--G--GC-C-A-----A-C---A-C-T--GA--CG-C-T-G--A-GG--C-G-CG-A--AA-G-C---C-AG--GG-G--AG-C-A-AA--  
-----CG--GG Bacteria(100);Acidobacteria(100);Acidobacteria(100);Acidobacteriales(100);Acidobacteriaceae(100);Candidatus\_Chloroacidobacterium(100);unclassified(100);unclassified(100);unclassified(100);



Otu0355 0 0 0 0 0 0 0 0 0 0 0 0 0 0 0 0 0 0 0 0 0 0 0 0 0 0 1  
0 0 0 0 0 0 0 64 0 0 0 0 28 0 0 0 67 0 29 0 0 51 0 0 10 0 0 0  
101 0 14 0 0 0 0 0 0 0 23 24 0 2 15 0 0 0 270 847 365 0 0 0 0 0 1 84  
1 0 11 0 0 170 0 0 0 298 0 202 7 0 9 0 0 114 0 0 0 0 93 0 0 0 0  
M02255\_77\_000000000-ADUT3\_1\_2118\_25557\_9143 T---AC---GT-AG-GGG-----GCT-A-G-----C-G--T---T--GT-C-CGG-AA-----TC-A--C-T--GG-GC-----GT--A----AA-GG-GT-TC-----G-CA-G-G-C-G-----G--C-AA-T-G-C-----  
AA---G-T-C-A-----G-A-T--G-TA--A-AA-GG--C-A-AA-G-G-----CT-C-AA-----C-C-T-T-T-G-T--A-----A-G-C-A--T-C-----T--GA-A-A--C-----T--G-T--AT--A-G-C---T-T-G-A-G-A-A--G-TG-----TA-G-A-----G-G-C-A--AG-T-----GG--A--ATT----T-T-T-  
A-GT--GT-A-G-CG-GT--G---A--A--TG-C-GT-AG--AT-A-TT--A-A--A-A-G-A-AT-A-CC---GG--T--G--GC-GAA-G--G-C-G-----A-C-T-T-G---CTG--G--GC-A-C-----A-A---T-C-T--GA--CG-C-T-G--A-GG--A-A-CG-A--AA-G-C---G-TG--GG-G--  
AG-C-A-AA-----CA--GG Bacteria(100);Firmicutes(100);Clostridia(100);Clostridiales(100);Family\_XI\_Incertae\_Sedis(100);Peptoniphilus(100);unclassified(100);unclassified(100);unclassified(100);

Otu0356 0 0 0 0 0 0 0 0 0 0 0 0 0 0 0 0 0 0 0 0 1 2 0 0 0 18 0 0 16  
0 0 0 0 0 0 0 0 0 5 0 0 0 0 0 0 0 0 0 0 0 0 0 0 0 0 0  
0 0 0 0 0 0 0 0 0 0 0 0 0 0 0 0 0 0 0 0 0 0 0 0 0 0 0 0  
0 0 0 0 0 0 0 0 0 28 0 0 0 0 0 0 0 0 0 0 0 0 0 0 0 0 0  
M02255\_77\_000000000-ADUT3\_1\_2103\_27258\_15484 T---AC---GG-AG-GGG-----GCT-A-G-----C-G--T---T--GT-T-CGG-AA-----TT-A--C-T--GG-GC-----GT--A----AA-GC-GC-AC-----G-TA-G-G-C-G-----G--A-CT-G-G-A-----  
-----AA---G-T-T-G-----G-G-G--G-TG--A-AA-TC--C-C-GG-G-G-----CT-C-AA-----C-C-T-C-G-G-A--A-C---T-G--C-C---T-T-----C-AA-A-A--C-----T--A-T--CA-G-T-C---T-G-G-A-G-T--T--C-GG-----GA-G-A-----G-G-T-G--AG-T-----GG--A--ATT---  
G-C-G-A-GT--GT-A-G-AG-GT--G---A--A--TT-C-GT-AG--AT-A-TT--C-G--C-A-G-G-A-AC-A-CC--AG--T--G--GC-GAA-G--G-C-G-----G--C-T-C-A--CTG--G--CT-C-G-----A-T---A-C-T--GA--CG-C-T-G--A-GG--T-G-CG-A--AA-G-C---G-TG--GG-  
G--AG-C-A-AA-----CA--GG Bacteria(100);Proteobacteria(100);Alphaproteobacteria(100);Rhodobacterales(100);Rhodobacteraceae(100);unclassified(100);unclassified(100);unclassified(100);unclassified(100);

Otu0357 0 0 25 0 0 0 19 93 115 0 0 0 0 0 0 0 0 0 0 0 0 0 0 0 0 0 0  
0 0 0 0 0 0 28 0 0 0 0 0 0 0 0 0 0 0 0 0 0 0 0 0 0 0 0  
0 0 0 0 0 0 0 0 0 0 0 0 0 0 0 0 0 0 0 0 0 0 0 0 0 0 0  
0 0 0 0 0 0 0 0 0 0 0 0 0 0 0 0 0 0 0 0 0 0 0 61 0 0  
M02255\_77\_000000000-ADUT3\_1\_1114\_4849\_7739 T---AC---GT-AG-GGG-----GCG-A-G-----C-G--T---T--GT-C-CGG-AA-----TG-A--T-T--GG-GC-----GT--A----AA-GG-GC-GC-----G-TA-G-G-C-G-----G--C-CT-G-C-T-----  
AA---G-T-C-T-----G-A-A--G-TG--A-AA-GT--C-C-TG-C-T---TT-C-AA-----G-G-T-G-G-G-A--A-G---T-G--C-T---T-T-----G-GA-T-A--C-----T--G-G--TG--G-G-C---T-G-G-A-G-T--G--C-AG-----GA-G-A-----G-G-A-A--AG-C-----GG--A--ATT---A-C-  
C-G-GT--GT-A-G-CG-GT--G---A--A--TG-C-GT-AG--AG-A-TC--G-G--T-A-G-G-A-AC-A-CC--AG--T--G--GC-GAA-G--G-C-G-----G--C-T-T-T---CTG--G--AC-T-G-----A-A---A-C-T--GA--CG-C-T-G--A-GG--C-G-CG-A--AA-G-C---G-TG--GG-G--  
AG-C-A-AA-----CA--GG Bacteria(100);unclassified(100);unclassified(100);unclassified(100);unclassified(100);unclassified(100);unclassified(100);unclassified(100);unclassified(100);

Otu0358 0 0 0 0 0 0 0 0 0 0 0 1 0 0 0 0 0 0 0 0 0 0 0 0 0 0 0 7  
0 0 0 0 0 0 0 428 79 0 42 131 0 0 0 1 0 0 0 0 0 0 0 0 0 0  
0 0 0 0 0 0 0 0 0 0 0 0 0 0 0 0 0 0 0 0 0 0 0 0 0 0 0  
0 0 0 0 0 0 0 0 0 0 0 0 0 0 0 0 0 38 0 0 0 0 0 0 0 0  
M02255\_77\_000000000-ADUT3\_1\_1117\_13282\_11517 T---AC---GT-AG-GGG-----GCG-A-G-----C-G--T---T--GT-C-CGG-AA-----TC-A--T-T--GG-GC-----GT--A----AA-GA-GC-TC-----G-TA-G-G-C-G-----G--T-TC-A-G-T-----  
-----AA---G-T-C-G-----G-C-T--G-TG--A-AA-TT--C-C-GA-G-G-----CT-C-AA-----C-C-T-C-G-G-A--A-----C-T-GC-A--G--T-----C-GA-A-A--C-----T--A-T--TG-TG-A-C---T-C-G-A-G-T--C---C-GG-----TA-G-A-----G-G-A-G---AA-T-----GG--A--ATT---C-  
C-C-G-GT--GT-A-G-CG-GT--G---A--A--TG-C-GC-AG--AT-A-TC--G-G--G-A-G-G-A-AC-A-CC--AG--T--A--GC-GAA-G--G-C-G-----G--T-T-C-T---CTG--G--GC-C-G-----G-T---A-C-T--GA--CG-C-T-G--A-GG--A-G-CG-A--AA-G-C---G-TG--GG-  
G--AG-C-A-AA-----CA--GG Bacteria(100);unclassified(100);unclassified(100);unclassified(100);unclassified(100);unclassified(100);unclassified(100);unclassified(100);unclassified(100);

Otu0359 0 0 0 0 0 0 0 0 0 0 0 0 0 0 0 0 0 0 0 0 0 0 0 0 0 0 0  
0 0 0 1 0 0 0 0 0 0 66 3 0 0 0 0 0 0 0 0 0 0 0 0 24 0 0 0  
0 0 0 0 0 0 0 0 0 0 0 0 0 0 0 0 0 0 0 0 0 0 0 0 0 0 0  
0 0 0 0 0 0 0 0 0 0 0 0 0 0 0 0 0 0 0 0 0 0 0 0 0 0  
M02255\_77\_000000000-ADUT3\_1\_2106\_28961\_11219 T---AC---GA-AG-GGG-----GCT-A-G-----C-G--T---T--GT-T-CGG-AA-----TC-A--C-T--GG-GC-----GT--A----AA-GC-GC-AC-----G-TA-G-G-C-G-----G--A-CT-T-T-T-----  
-----AA---G-T-C-A-----G-A-G--G-TG--A-AA-TC--C-C-AA-G-G-----CT-C-AA-----C-C-T-T-G-G-A--A-C---T-G--C-C---T-T-----T--GA-T-A--C-----T--G-G--GA--G-T-C---T-T-G-A-G-T--T--C-GG-----GA-G-A-----G-G-T-G--AG-T-----GG--A--ACT---G-  
C-G-A-GT--GT-A-G-AG-GT--G---A--A--TT-C-GT-AG--AT-A-TT--C-G--C-A-A-G-A-AC-A-CC--AG--T--G--GC-GAA-G--G-C-G-----G--C-T-C-A--CTG--G--CC-C-G-----A-T---A-C-T--GA--CG-C-T-G--A-GG--T-G-CG-A--AA-G-C---G-TG--GG-G-  
-AG-C-A-AA-----CA--GG Bacteria(100);Proteobacteria(100);Alphaproteobacteria(100);Rhizobiales(100);unclassified(100);unclassified(100);unclassified(100);unclassified(100);unclassified(100);



|                                                                                                                                                                                                                                                                                                                                                                                                                                                                                                                                                                                                                                                                                                                                                                                                                              |    |    |    |    |    |   |    |   |    |   |   |    |   |   |    |   |    |   |   |    |   |   |   |    |    |   |    |   |
|------------------------------------------------------------------------------------------------------------------------------------------------------------------------------------------------------------------------------------------------------------------------------------------------------------------------------------------------------------------------------------------------------------------------------------------------------------------------------------------------------------------------------------------------------------------------------------------------------------------------------------------------------------------------------------------------------------------------------------------------------------------------------------------------------------------------------|----|----|----|----|----|---|----|---|----|---|---|----|---|---|----|---|----|---|---|----|---|---|---|----|----|---|----|---|
| Otu0360                                                                                                                                                                                                                                                                                                                                                                                                                                                                                                                                                                                                                                                                                                                                                                                                                      | 0  | 0  | 0  | 0  | 0  | 0 | 0  | 0 | 0  | 0 | 0 | 0  | 0 | 0 | 0  | 0 | 0  | 0 | 0 | 0  | 0 | 0 | 0 | 0  | 0  | 0 | 13 |   |
|                                                                                                                                                                                                                                                                                                                                                                                                                                                                                                                                                                                                                                                                                                                                                                                                                              | 0  | 0  | 0  | 0  | 0  | 0 | 0  | 0 | 0  | 0 | 0 | 0  | 0 | 0 | 0  | 0 | 0  | 0 | 0 | 0  | 0 | 0 | 0 | 0  | 0  | 0 | 0  |   |
|                                                                                                                                                                                                                                                                                                                                                                                                                                                                                                                                                                                                                                                                                                                                                                                                                              | 0  | 0  | 0  | 0  | 0  | 0 | 0  | 0 | 0  | 0 | 0 | 0  | 0 | 0 | 0  | 0 | 19 | 0 | 0 | 0  | 0 | 0 | 0 | 0  | 0  | 0 | 0  |   |
|                                                                                                                                                                                                                                                                                                                                                                                                                                                                                                                                                                                                                                                                                                                                                                                                                              | 0  | 0  | 0  | 0  | 0  | 0 | 0  | 0 | 0  | 0 | 0 | 0  | 0 | 0 | 34 | 0 | 0  | 0 | 0 | 0  | 0 | 0 | 0 | 0  | 0  | 0 | 0  |   |
| M02255_77_000000000-ADUT3_1_1110_20245_17613 T---AC---GG-AG-GGA-----GCT-A-G-----C-G--T--T--GT-T-CGG-AA-----TT-A--C-T--GG-GC-----GT--A----AA-GC-GC-AC-----G-TA-G-G-C-G-----G--C-TA-T-T-C-----AA---G-T-C-G-----G-G-G--G--TG--A-AA-GC--C-C-GG-G-G----CT-C-AA-----C-C-C-C-G-G-A-A-C---T-G--C-C--C-T-----C--GA-A-A--C-----T-A-G--GT--A-G-C---T-A-G-A-A-T--C--T-TG----GA-G-A-----G-G-T-C---AG-T----GG--A--ATT---C-C-G-A-GT--GT-A-G-AG-GT--G--A--A-A---TT-C-GT-AG--AT-A-TT--C-G--G-A-A-G-A-AC-A-CC--AG--T--G--GC-GAA-G--G-C-G-----A-C-T-G-A---CTG--G--AC-A-A-----G-T--A-T-T--GA--CG-C-T-G--A-GG--T-G-CG-A--AA-G-C---G-TG--GG-G--AG-C-A-AA-----CA--GG Bacteria(100);Proteobacteria(100);Alphaproteobacteria(100);Sphingomonadales(100);unclassified(100);unclassified(100);unclassified(100);unclassified(100);unclassified(100);    |    |    |    |    |    |   |    |   |    |   |   |    |   |   |    |   |    |   |   |    |   |   |   |    |    |   |    |   |
| Otu0361                                                                                                                                                                                                                                                                                                                                                                                                                                                                                                                                                                                                                                                                                                                                                                                                                      | 0  | 0  | 0  | 0  | 0  | 0 | 0  | 0 | 0  | 0 | 0 | 0  | 0 | 0 | 0  | 1 | 0  | 0 | 0 | 2  | 0 | 0 | 0 | 0  | 0  | 0 | 0  |   |
|                                                                                                                                                                                                                                                                                                                                                                                                                                                                                                                                                                                                                                                                                                                                                                                                                              | 0  | 0  | 0  | 0  | 0  | 0 | 0  | 0 | 0  | 0 | 0 | 0  | 0 | 0 | 0  | 0 | 0  | 0 | 0 | 0  | 0 | 0 | 0 | 0  | 46 | 0 | 0  |   |
|                                                                                                                                                                                                                                                                                                                                                                                                                                                                                                                                                                                                                                                                                                                                                                                                                              | 0  | 0  | 0  | 0  | 0  | 0 | 0  | 0 | 0  | 0 | 0 | 0  | 0 | 0 | 0  | 0 | 13 | 0 | 0 | 0  | 0 | 2 | 0 | 0  | 0  | 0 | 0  |   |
|                                                                                                                                                                                                                                                                                                                                                                                                                                                                                                                                                                                                                                                                                                                                                                                                                              | 0  | 0  | 0  | 0  | 0  | 0 | 0  | 0 | 0  | 0 | 0 | 0  | 8 | 0 | 0  | 0 | 0  | 0 | 0 | 10 | 0 | 0 | 0 | 0  | 0  | 0 | 0  |   |
| M02255_77_000000000-ADUT3_1_2114_25602_13003 T---AC---GT-AG-GGT-----GCA-A-G-----C-G--T--T--GT-C-CGG-AA-----TT-A--T-T--GG-GC-----GT--A----AA-GA-GC-TC-----G-TA-G-G-C-G-----G--T-T-C-G-T-C-----GC---G-T-C-G-----G-C-T--G--TG--A-AA-AC--C-T-GA-G-G----CT-C-AA-----C-C-T-C-A-G-G--C-C---T-G--C-A--G-T-----C--GA-T-A--C-----G--G-G--CG--G-A-C---T-T-G-A-G-T--A--C-TG---CA-G-G-----G-G-A-G---AC-T----GG--A--ATT---C---C-T-G-GT--GT-A-G-CG-GT--G--A--A-A---TG-C-GC-AG--AT-A-TC--A-G--G-A-G-G-A-AC-A-CC--GG--T--G--GC-GAA-G--G-C-G-----G-G-T-C-T---CTG--G--GC-A-G-----T-A--A-C-T--GA--CG-C-T-G--A-GG--A-G-CG-A--AA-G-C---G-TG--GG-G--AG-C-G-AA-----CA--GG Bacteria(100);Actinobacteria(100);Actinobacteria(100);Actinobacteridae(100);Actinomycetales(100);Frankineae(91);Geodermatophilaceae(91);unclassified(91);unclassified(91); |    |    |    |    |    |   |    |   |    |   |   |    |   |   |    |   |    |   |   |    |   |   |   |    |    |   |    |   |
| Otu0362                                                                                                                                                                                                                                                                                                                                                                                                                                                                                                                                                                                                                                                                                                                                                                                                                      | 0  | 0  | 0  | 0  | 0  | 0 | 0  | 0 | 0  | 0 | 0 | 0  | 0 | 0 | 0  | 0 | 0  | 0 | 0 | 0  | 0 | 0 | 0 | 12 | 0  | 5 | 0  | 4 |
|                                                                                                                                                                                                                                                                                                                                                                                                                                                                                                                                                                                                                                                                                                                                                                                                                              | 0  | 0  | 0  | 0  | 0  | 0 | 0  | 0 | 0  | 0 | 0 | 0  | 0 | 0 | 0  | 0 | 0  | 0 | 0 | 0  | 0 | 0 | 0 | 0  | 0  | 0 | 0  |   |
|                                                                                                                                                                                                                                                                                                                                                                                                                                                                                                                                                                                                                                                                                                                                                                                                                              | 0  | 41 | 5  | 0  | 0  | 0 | 0  | 0 | 0  | 0 | 0 | 0  | 0 | 0 | 1  | 0 | 0  | 0 | 0 | 0  | 0 | 0 | 0 | 0  | 0  | 0 | 0  |   |
|                                                                                                                                                                                                                                                                                                                                                                                                                                                                                                                                                                                                                                                                                                                                                                                                                              | 24 | 0  | 0  | 51 | 60 | 0 | 2  | 0 | 0  | 0 | 0 | 0  | 0 | 0 | 0  | 0 | 0  | 0 | 0 | 0  | 0 | 0 | 0 | 0  | 0  | 0 | 0  |   |
| M02255_77_000000000-ADUT3_1_1111_8278_14323 T---AC---GT-AT-GTC-----GCG-A-G-----C-G--T--T--AT-C-CGG-AA-----TT-A--T-T--GG-GC-----AT--A----AA-GG-GC-AT-----C-TA-G-G-C-G-----G--A-TA-T-A-C-----AA---G-T-C-A-----G-G-G--G--TG--A-AA-AC--T-T-AG-G-G----CT-C-AA-----C-T-C-A-A-A-G--C-T---T-G--C-C--T-T-----T--GA-A-A--C-----T--G-T--AT--A-T-C---T-A-G-A-G-T--G--C-TG---GA-G-A-----G-G-T-G--GA-C-----GG--A--ACT---A-C-A-C-GA--GT-A-G-AG-GT--G--A--A-A---TT-C-GT-AG--AT-A-TG--T-G--T-A-G-G-A-AT-G-CC--GA--T--G--AT-GAA-G--A-T-A-----G--T-C-C-A---CTG--G--AC-A-G-----C-A--A-C-T--GA--CG-C-T-G--A-AG--T-G-CG-A--AA-G-C---T-AG--GG-G--AG-C-A-AA-----CA--GG Bacteria(100);Fusobacteria(100);Fusobacteria(100);Fusobacteriales(100);Leptotrichiaceae(100);Leptotrichia(100);unclassified(100);unclassified(100);unclassified(100);         |    |    |    |    |    |   |    |   |    |   |   |    |   |   |    |   |    |   |   |    |   |   |   |    |    |   |    |   |
| Otu0363                                                                                                                                                                                                                                                                                                                                                                                                                                                                                                                                                                                                                                                                                                                                                                                                                      | 4  | 22 | 21 | 0  | 0  | 0 | 13 | 0 | 30 | 0 | 0 | 0  | 0 | 0 | 0  | 0 | 0  | 0 | 0 | 0  | 0 | 0 | 0 | 0  | 0  | 0 | 0  |   |
|                                                                                                                                                                                                                                                                                                                                                                                                                                                                                                                                                                                                                                                                                                                                                                                                                              | 0  | 0  | 0  | 0  | 0  | 0 | 4  | 0 | 0  | 0 | 0 | 20 | 0 | 0 | 0  | 0 | 0  | 0 | 0 | 0  | 0 | 0 | 0 | 0  | 0  | 0 | 0  |   |
|                                                                                                                                                                                                                                                                                                                                                                                                                                                                                                                                                                                                                                                                                                                                                                                                                              | 0  | 0  | 0  | 0  | 0  | 0 | 0  | 0 | 0  | 0 | 0 | 0  | 0 | 0 | 0  | 0 | 0  | 0 | 0 | 0  | 0 | 0 | 0 | 0  | 0  | 0 | 0  |   |
|                                                                                                                                                                                                                                                                                                                                                                                                                                                                                                                                                                                                                                                                                                                                                                                                                              | 0  | 0  | 0  | 0  | 0  | 0 | 0  | 0 | 0  | 0 | 0 | 0  | 0 | 0 | 0  | 0 | 0  | 0 | 0 | 0  | 0 | 6 | 0 | 20 | 0  | 0 | 0  |   |
| M02255_76_000000000-ADUNE_1_2105_19266_8185 T---CG---GC-TA-ACT-----CCG-T-G-----C-C--A--G--CA                                                                                                                                                                                                                                                                                                                                                                                                                                                                                                                                                                                                                                                                                                                                 |    |    |    |    |    |   |    |   |    |   |   |    |   |   |    |   |    |   |   |    |   |   |   |    |    |   |    |   |



Otu0365 0 0 0 0 0 0 0 0 0 0 0 0 0 0 0 0 0 0 0 0 0 0 0 0 0 0 0 0  
0 0 0 0 0 0 0 0 0 0 0 18 0 0 0 0 0 0 0 0 0 0 0 0 0 0 0 0  
0 0 0 0 0 0 0 0 0 0 0 0 0 17 35 0 0 0 37 0 0 0 0 0 0 0 24 0  
0 0 0 0 0 0 0 0 0 0 0 0 4 0 0 0 0 0 0 0 0 0 0 0 0 0 0  
M02255\_77\_000000000-ADUT3\_1\_2114\_5807\_16046 T---AC---GT-AG-GGG-----GCA-A-G-----C--G--T---T--GT-C-CGG-AA-----TC-A--T-T--GG-GC-----GT--A----AA-GA-GT-AC-----G-TA-G-G-C-G-----G--T-CT-G-A-T-----AA-  
---G-C-A-C-----A-A-G--G--TT--T-AA-GG--C-A-AC-A-G----CT-C-AA-----C-T-G-T-T-G-T-T-----C-G--C-C---T-T-----G--TG-A-A--C-----T-G-T--TA-G-A-C---T-T-G-A-G-T-G---C-GG----GA-G-A-----G-G-A-A--AG-C-----GG--A--ATT---C-C-T-G-  
GT--GT-A-G-CG-GT--G---A--A---TG-C-GT-AG--AT-A-TC--A-G--G-A-G-G-A-AT-A-CC---GG--T--G--GC-GAA-G--G-C-G-----G--C-T-T-T---CTG--G--AC-C-G-----T-A---A-C-T-GA--CG-C-T-G--A-GG--T-A-CG-A-AA-G-C---G-TG--GG-G--AG-  
C-A-AA-----CA--GG Bacteria(100);Firmicutes(52);Clostridia(52);Clostridiales(52);unclassified(52);unclassified(52);unclassified(52);unclassified(52);unclassified(52);

Otu0366 0 0 0 0 0 0 0 0 0 0 0 0 0 0 0 0 0 0 0 0 0 0 0 0 0 0 0 0  
0 0 0 0 59 0 0 42 0 0 0 0 0 43 0 0 0 0 0 0 0 0 0 0 0 0 0 0  
0 0 0 0 0 0 0 0 0 0 4 0 0 1 11 0 0 0 0 0 0 4 0 33 0 0 0 0 0  
0 0 0 0 0 0 0 0 2 0 0 0 0 0 18 0 0 0 0 0 0 0 0 0 0 0 0 0  
M02255\_76\_000000000-ADUNE\_1\_1116\_24883\_4572 T---AC---GT-AG-GGC-----GCA-A-G-----C--G--T---T--GT-C-CGG-AA-----TT-A--T-T--GG-GC-----GT-----AA-----A--G--G-----G--C-TT-G-T-C-----GC---G-T-  
C-T-----G-C-C--G--TG--A-AA-AC--T-C-GA-G-G-----CT-T-AA-----C-C-T-T-G-G-G--C-G---T-G--C-G--G--T-----G--GG-T-A--C-----G--G-G-CA-G-G-C---T-A-G-A-G-T-G---C-GG----TA-G-G-----G-G-A-G--AC-T-----GG--A--ATT---C-C-T-G-GT--  
GT-A-G-CG-GT--G---A--A---TG-C-GC-AG--AT-A-TC--A-G--G-A-G-G-A-AC-A-CC---GA--T--G--GC-GAA-G--G-C-A-----G--G-T-C-T---CTG--G--GC-C-G-----T-T---A-C-T-GA--CA-C-T-G--A-GA--A-G-CG-A-AA-G-C---A-TG--GG-G--AG-C-G-  
AA-----CA--GG Bacteria(100);Actinobacteria(100);Actinobacteria(100);Actinobacteridae(100);Actinomycetales(100);Micrococcineae(100);Dermabacteraceae(60);unclassified;unclassified;

Otu0367 0 3 0 1 0 0 3 0 0 0 0 0 0 0 0 0 0 0 0 0 0 0 0 0 0 0 0 0  
0 0 0 0 2 0 0 0 0 0 0 0 0 0 0 0 0 0 0 0 0 0 0 0 0 0 0 0  
0 0 0 0 0 0 0 0 0 0 0 0 0 2 0 0 0 0 0 0 0 0 0 0 0 0 0 2 6  
0 0 13 0 0 0 0 2 0 0 0 0 0 0 0 0 0 4 0 1 2 0 0 0 2 0 19  
M02255\_76\_000000000-ADUNE\_1\_2106\_9941\_18425 G---AA---GC-AC-CGG-----CTA-A-C-----T--C--C---G--TG-C-CAG-CA-----GC-C--G-C--GG-TA-----AT--A----CG-GA-GG-GT-----G-CG-A-G-C-G-----T--T-AATC-G-G-----  
AA---G-T-G-A-----G-G-T--G--TG--A-AA-GC--C-C-CG-G-G-----CT-T-AA-----C-C-T-G-G-G-A-A-T---T-G--C-A---T-T-----T--CA-T-A--C-----T--G-G--GT--C-G-C---T-A-G-A-G-T-A---C-TT-----TA-G-G-----G-A-G-G--GG-T-----AG--A--ATT---C-C-A-  
C-GT--GT-A-G-CG-GT--G---A--A---TG-C-GT-AG--AG-A-TG--T-G--G-A-G-G-A-AT-A-CC---GA--A--G--GC-GAA-G--G-C-A-----G--C-C-C-C---TTG--G--GA-A-T-----G-T---A-C-T-GA--CG-C-T-C--A-TG--T-G-CG-A-AA-G-C---G-TG--GG-G--  
AG-C-A-AA-----CA--GG Bacteria(100);Proteobacteria(100);Gammaproteobacteria(100);Pasteurellales(100);Pasteurellaceae(100);unclassified(100);unclassified(100);unclassified(100);unclassified(100);

Otu0368 0 0 0 0 0 0 81 9 175 0 0 0 0 0 0 0 0 0 0 0 0 0 0 0 0 0 0 0  
0 0 0 0 0 0 0 0 0 0 0 0 0 0 0 48 0 0 0 0 0 0 0 0 0 0 0 0  
0 0 0 0 0 0 0 0 0 0 0 0 0 0 0 0 0 0 0 0 0 0 0 0 0 0 0 0  
0 0 0 0 0 0 0 0 0 0 0 0 0 0 0 0 0 0 0 0 0 0 0 21 0 0  
M02255\_77\_000000000-ADUT3\_1\_1103\_13193\_8254 T---AC---GT-AG-GTG-----GCA-A-G-----C--G--T---T--GT-C-CGG-AT-----TT-A--C-T--GG-GT-----GT--A----AA-GG-GC-GT-----G-TA-G-G-C-G-----G--A-GA-A-G-C-----  
AA---G-T-C-A-----G-A-A--G--TG--A-AA-TC--C-A-TG-G-G-----CT-T-AA-----C-C-C-A-T-G-A--A-C---T-G--C-T---T-T-----T--GA-A-A--C-----T--G-T--TT--C-C-C---T-T-G-A-G-T-A---T-CG----GA-G-A-----G-G-C-A--GG-C-----GG--A--ATT---C-C-T-  
A-GT--GT-A-G-CG-GT--G---A--A---TG-C-GT-AG--AT-A-TT--A-G--G-A-G-G-A-AC-A-CC---AG--T--G--GC-GAA-G--G-C-G-----G--C-C-T-G---CTG--G--AC-G-A-----C-A---A-C-T-GA--CG-C-T-G--A-GG--C-G-CG-A-AA-G-C---G-TG--GG-G--  
AG-C-A-AA-----CA--GG Bacteria(100);Firmicutes(100);Clostridia(100);Clostridiales(100);unclassified(100);unclassified(100);unclassified(100);unclassified(100);unclassified(100);

Otu0369 0 0 0 0 0 0 1 0 0 0 0 0 0 0 0 0 0 0 0 0 0 0 0 0 0 0 0 0  
0 0 0 0 0 0 0 0 0 0 0 0 0 0 0 0 0 0 0 0 0 0 0 0 0 0 0 15  
0 0 0 0 0 0 0 0 0 0 0 0 0 0 0 0 0 0 5 0 0 0 0 0 0 0 0 0  
0 0 0 0 0 0 0 0 0 0 0 0 0 0 0 0 0 0 3 3 36 0 0 0 0 2  
M02255\_76\_000000000-ADUNE\_1\_2104\_16888\_9901 C---GG---CT-AA-TTC-----CGT-G-C-----C--A--G---C--AG-C-CGC-GG-----TA-A--T-A--CG-GA-----AG--G----TC-CA-GG-CG-----T-TA-T-C-C-G-----GA-T-TT-G-T-T-----AA--  
--G-C-G-T-----G-T-T--G--TG--A-AA-TT--T-A-GA-T-G-----CT-C-AA-----C-A-T-T-T-A-A--C-T---T-G--C-A--G--C-----G--CG-A-A--C-----T--G-T--CA--G-A-C---T-T-G-A-G-T-A---C-AC----GC-A-A-----C-G-T-A--TG-C-----GG--A--ATT---C-A-T-G-GT--  
GT-A-G-CG-GT--G---A--A---TG-C-TT-AG--AT-A-TC--A-T--G-A-G-A-AC-T-CC---GA--T--T--GC-GAA-G--G-C-A-----G--C-A-T-A---CGG--G--AG-T-G-----T-A---A-C-T-GA--CG-C-T-T--A-AG--C-T-CG-A--AG-G-T---G-CG--GG-T--AT-C-G-  
AA-----CA--GG Bacteria(100);Bacteroidetes(100);Bacteroidia(100);Bacteroidales(100);Prevotellaceae(100);Prevotella(100);unclassified(100);unclassified(100);unclassified(100);



|                                                                                                                                                                                                                                                                                                                                                                                                                                                                                                                                                                                                                                                                                                                                                                                                                                      |    |   |    |   |     |     |     |     |   |     |    |     |     |    |    |   |     |    |     |     |     |    |    |    |    |   |   |    |   |
|--------------------------------------------------------------------------------------------------------------------------------------------------------------------------------------------------------------------------------------------------------------------------------------------------------------------------------------------------------------------------------------------------------------------------------------------------------------------------------------------------------------------------------------------------------------------------------------------------------------------------------------------------------------------------------------------------------------------------------------------------------------------------------------------------------------------------------------|----|---|----|---|-----|-----|-----|-----|---|-----|----|-----|-----|----|----|---|-----|----|-----|-----|-----|----|----|----|----|---|---|----|---|
| Otu0370                                                                                                                                                                                                                                                                                                                                                                                                                                                                                                                                                                                                                                                                                                                                                                                                                              | 0  | 0 | 0  | 0 | 0   | 19  | 345 | 330 | 0 | 0   | 0  | 7   | 0   | 5  | 0  | 0 | 0   | 0  | 0   | 0   | 0   | 0  | 0  | 0  | 0  | 0 | 0 |    |   |
|                                                                                                                                                                                                                                                                                                                                                                                                                                                                                                                                                                                                                                                                                                                                                                                                                                      | 0  | 0 | 1  | 0 | 3   | 7   | 0   | 29  | 0 | 0   | 0  | 122 | 609 | 0  | 0  | 0 | 149 | 0  | 0   | 0   | 102 | 17 | 0  | 22 | 26 | 0 | 0 | 38 | 0 |
|                                                                                                                                                                                                                                                                                                                                                                                                                                                                                                                                                                                                                                                                                                                                                                                                                                      | 0  | 0 | 12 | 0 | 9   | 15  | 0   | 6   | 0 | 4   | 15 | 39  | 3   | 19 | 19 | 9 | 0   | 26 | 138 | 564 | 212 | 19 | 5  | 0  | 0  | 0 | 0 | 52 | 0 |
|                                                                                                                                                                                                                                                                                                                                                                                                                                                                                                                                                                                                                                                                                                                                                                                                                                      | 3  | 0 | 0  | 0 | 119 | 109 | 10  | 22  | 0 | 280 | 0  | 574 | 0   | 35 | 2  | 0 | 0   | 0  | 0   | 0   | 0   | 37 | 59 | 0  | 34 | 0 | 0 |    |   |
| M02255_77_000000000-ADUT3_1_1115_11861_2639 T---AC---GT-AT-GGA-----GCG-A-G-----C-G-T---T-GT-C-CGG-AA-----TT-A-T-T-GG-GC-----GT--A---AA-GG-GT-GC-----G-CA-G-G-C-G-----G-C-TT-T-A-C-----AA-<br>---G-T-T-G-----G-A-T-G-TG--A-AA-TA--T-T-GT-G-G-----CT-C-AA-----C-C-A-C-A-AAC--G-----T-G-C-A--T-C-----C-AA-A-A--C-----T-G-C-AA--A-G-C---T-T-G-A-G-T-T--A-AG---GA-G-A-----G-G-T-A--AG-T-----GG-A-ATT---C-C-T-G-<br>GT--GT-A-G-CG-GT--G---G--A-A---TG-C-GT-AG--AT-A-TC--A-G--G-A-G-G-A-AT-A-CC--GG--T-G--GC-GAA-G--G-C-G-----A-C-T-T-A---CTG--G--AC-T-T-----A-A--A-C-T--GA--CG-C-T-C--A-GG--C-A-CG-A-AA-G-C--G-TG--GG-G--AG-<br>C-A-AA-----CA--GG Bacteria(100);Firmicutes(100);Clostridia(100);Clostridiales(100);Family_XI_Incertae_Sedis(100);Finegoldia(100);unclassified(100);unclassified(100);unclassified(100);                    |    |   |    |   |     |     |     |     |   |     |    |     |     |    |    |   |     |    |     |     |     |    |    |    |    |   |   |    |   |
| Otu0371                                                                                                                                                                                                                                                                                                                                                                                                                                                                                                                                                                                                                                                                                                                                                                                                                              | 83 | 0 | 0  | 0 | 0   | 0   | 0   | 0   | 0 | 0   | 0  | 0   | 0   | 0  | 0  | 0 | 0   | 0  | 0   | 0   | 0   | 0  | 0  | 0  | 0  | 0 | 0 | 0  | 0 |
|                                                                                                                                                                                                                                                                                                                                                                                                                                                                                                                                                                                                                                                                                                                                                                                                                                      | 0  | 0 | 0  | 0 | 0   | 0   | 0   | 0   | 0 | 0   | 0  | 0   | 0   | 0  | 0  | 0 | 0   | 0  | 0   | 0   | 0   | 0  | 30 | 0  | 0  | 0 | 0 | 0  | 0 |
|                                                                                                                                                                                                                                                                                                                                                                                                                                                                                                                                                                                                                                                                                                                                                                                                                                      | 0  | 0 | 0  | 0 | 0   | 0   | 0   | 0   | 0 | 0   | 0  | 0   | 0   | 0  | 0  | 0 | 0   | 0  | 0   | 0   | 0   | 0  | 0  | 0  | 0  | 0 | 0 | 0  | 0 |
|                                                                                                                                                                                                                                                                                                                                                                                                                                                                                                                                                                                                                                                                                                                                                                                                                                      | 0  | 0 | 0  | 0 | 0   | 0   | 0   | 0   | 0 | 0   | 0  | 0   | 0   | 0  | 0  | 0 | 0   | 0  | 0   | 0   | 0   | 0  | 0  | 0  | 0  | 0 | 0 | 0  | 0 |
| M02255_77_000000000-ADUT3_1_2107_23800_14180 T---AC---GT-AG-GGT-----CCG-A-G-----C-G-T---T-GT-C-CGG-AA-----TT-A-T-T-GG-GC-----GT--A---AA-GG-GC-TC-----G-TA-G-G-C-G-----G--T-TC-G-T-C-----<br>-----GC---G-T-C-G-----G-G-A-G-TG--A-AA-AC--T-C-GG-A-G-----CT-C-AA-----C-T-C-C-G-A-G--C-C---T-G--C-T---T-C-----C-GA-T-A--C-----G--G-G-CA-G-A-C---T-A-G-A-G-G-T--A-AGG---CA-G-G-----G-G-A-G--AG-C-----GG-A-ACT---<br>C-C-T-G-GT--GT-A-G-CG-GT--G---G--A-A---TG-C-GC-AG--AT-A-TC--A-G--G-A-A-G-A-AC-A-CC--GG--T-G--GC-GAA-G--G-C-G-----G-C-T-C-T---CTG--G--GC-C-T-----T-A--C-C-T--GA--CG-C-T-G--A-GG--A-G-CG-A-AA-G-C--G-TG--<br>GG-T--AG-C-G-AA-----CA--GG Bacteria(100);Actinobacteria(100);Actinobacteria(100);Actinobacteridae(100);Actinomycetales(100);Propionibacterineae(100);Nocardiodaceae(100);Kribbella(100);unclassified(100); |    |   |    |   |     |     |     |     |   |     |    |     |     |    |    |   |     |    |     |     |     |    |    |    |    |   |   |    |   |
| Otu0372                                                                                                                                                                                                                                                                                                                                                                                                                                                                                                                                                                                                                                                                                                                                                                                                                              | 0  | 0 | 0  | 0 | 0   | 1   | 0   | 0   | 0 | 0   | 0  | 0   | 3   | 1  | 0  | 1 | 0   | 1  | 1   | 0   | 0   | 0  | 0  | 0  | 0  | 0 | 0 | 0  | 0 |
|                                                                                                                                                                                                                                                                                                                                                                                                                                                                                                                                                                                                                                                                                                                                                                                                                                      | 0  | 0 | 0  | 0 | 0   | 0   | 0   | 0   | 0 | 0   | 0  | 0   | 0   | 0  | 0  | 0 | 0   | 0  | 0   | 0   | 0   | 0  | 0  | 0  | 8  | 4 | 3 | 0  | 0 |
|                                                                                                                                                                                                                                                                                                                                                                                                                                                                                                                                                                                                                                                                                                                                                                                                                                      | 0  | 0 | 0  | 0 | 1   | 0   | 1   | 0   | 0 | 0   | 0  | 0   | 0   | 0  | 0  | 0 | 0   | 0  | 0   | 0   | 0   | 0  | 0  | 0  | 0  | 0 | 0 | 0  | 0 |
|                                                                                                                                                                                                                                                                                                                                                                                                                                                                                                                                                                                                                                                                                                                                                                                                                                      | 0  | 0 | 0  | 0 | 0   | 0   | 1   | 0   | 0 | 0   | 0  | 0   | 0   | 0  | 0  | 0 | 0   | 0  | 0   | 0   | 0   | 0  | 0  | 0  | 0  | 0 | 0 | 0  | 0 |
| M02255_76_000000000-ADUNE_1_2106_7591_16212 C---TG---TG-CC-AGC-----AGC-C-G-----C-G-G---T-AA-TACAG-AG-----GG-T-G-C-AA-GC-----GT--T---AA-TC-G-GA-----A-TT-A-C-T-G-----G--T-TT-G-T-T-----AA-<br>--G-T-T-G-----G-A-T-G-TG--A-AA-TC--C-C-CG-G-G-----CT-C-AA-----C-C-T-G-G-G-A-A-C---T-G--C-A--T-T-----C-AA-A-A--C-----T-G-A-CT--G-A-C---T-A-G-A-G-T-A--T-GG---TA-G-A-----G-G-G-T--GG-T-----GG-A-ATT---T-C-C-T-<br>GT--GT-A-G-CG-GT--G---A-A-A---TG-C-GT-AG--AT-A-TA--G-G--A-A-G-G-A-AC-A-CC--AG--T-G--GC-GAA-G--G-C-G-----A-C-C-A-C---CTG--G--AC-T-G-----A-T--A-C-T--GA--CA-C-T-G--A-GG--T-G-CG-A-AA-G-C--G-TG--GG-G--AG-<br>C-A-AA-----CA--GG Bacteria(100);Proteobacteria(100);Gammaproteobacteria(100);Pseudomonadales(100);Pseudomonadaceae(100);Pseudomonas(100);unclassified(100);unclassified(100);unclassified(100);              |    |   |    |   |     |     |     |     |   |     |    |     |     |    |    |   |     |    |     |     |     |    |    |    |    |   |   |    |   |
| Otu0373                                                                                                                                                                                                                                                                                                                                                                                                                                                                                                                                                                                                                                                                                                                                                                                                                              | 0  | 0 | 0  | 0 | 0   | 0   | 0   | 0   | 0 | 0   | 0  | 0   | 0   | 0  | 0  | 0 | 0   | 0  | 0   | 0   | 0   | 0  | 0  | 0  | 0  | 0 | 0 | 0  | 0 |
|                                                                                                                                                                                                                                                                                                                                                                                                                                                                                                                                                                                                                                                                                                                                                                                                                                      | 0  | 0 | 0  | 0 | 0   | 0   | 0   | 0   | 0 | 0   | 0  | 0   | 0   | 0  | 0  | 0 | 0   | 0  | 0   | 0   | 0   | 0  | 0  | 0  | 0  | 5 | 0 | 0  | 0 |
|                                                                                                                                                                                                                                                                                                                                                                                                                                                                                                                                                                                                                                                                                                                                                                                                                                      | 0  | 0 | 0  | 0 | 0   | 2   | 0   | 0   | 3 | 0   | 0  | 0   | 0   | 0  | 0  | 0 | 0   | 0  | 62  | 0   | 0   | 21 | 0  | 0  | 0  | 0 | 0 | 0  | 0 |
|                                                                                                                                                                                                                                                                                                                                                                                                                                                                                                                                                                                                                                                                                                                                                                                                                                      | 0  | 0 | 43 | 0 | 0   | 0   |     |     |   |     |    |     |     |    |    |   |     |    |     |     |     |    |    |    |    |   |   |    |   |



|                                                                                                                                                                                                                         |    |     |   |   |   |   |     |     |     |   |    |   |   |   |    |    |   |   |   |   |   |    |    |    |   |   |    |
|-------------------------------------------------------------------------------------------------------------------------------------------------------------------------------------------------------------------------|----|-----|---|---|---|---|-----|-----|-----|---|----|---|---|---|----|----|---|---|---|---|---|----|----|----|---|---|----|
| Otu0375                                                                                                                                                                                                                 | 0  | 0   | 0 | 0 | 0 | 0 | 0   | 0   | 0   | 0 | 0  | 0 | 0 | 0 | 0  | 0  | 0 | 0 | 3 | 0 | 0 | 0  | 0  | 0  | 0 | 0 | 0  |
|                                                                                                                                                                                                                         | 0  | 0   | 0 | 0 | 0 | 0 | 0   | 0   | 0   | 0 | 0  | 0 | 0 | 0 | 0  | 0  | 0 | 0 | 0 | 0 | 0 | 0  | 0  | 0  | 0 | 0 |    |
|                                                                                                                                                                                                                         | 0  | 104 | 7 | 0 | 0 | 0 | 0   | 0   | 0   | 0 | 51 | 0 | 0 | 0 | 0  | 0  | 0 | 0 | 0 | 0 | 0 | 0  | 0  | 0  | 0 | 0 |    |
|                                                                                                                                                                                                                         | 0  | 0   | 0 | 0 | 0 | 0 | 0   | 0   | 0   | 0 | 0  | 0 | 0 | 0 | 0  | 0  | 0 | 0 | 0 | 0 | 0 | 0  | 0  | 0  | 0 |   |    |
| M02255_77_000000000-ADUT3_1_1110_17525_15058                                                                                                                                                                            |    |     |   |   |   |   |     |     |     |   |    |   |   |   |    |    |   |   |   |   |   |    |    |    |   |   |    |
| T---AC---GA-AG-GGG-----GCT-A-G-----C-G-T---T-GT-T-CGG-AA-----TC-A-C-T--GG-GC-----GT-A---AA-GC-GC-AC-----G-TA-G-G-C-G-----G--A-CT-T-T-T-----                                                                             |    |     |   |   |   |   |     |     |     |   |    |   |   |   |    |    |   |   |   |   |   |    |    |    |   |   |    |
| -----AA---G-T-C-A-----G-G-G--G--TG--A-AA-TC--C-C-GG-G-G----CT-C-AA-----C-C-T-C-G-G-A-A-C---T-G-C-C---T-T-----T-GA-T-A---C-----T-G-G-AA-G-T-C---T-G-G-A-G-T-C---C-GA---GA-G-A-----G-G-T-G---AG-T-----GG-A--ACT---        |    |     |   |   |   |   |     |     |     |   |    |   |   |   |    |    |   |   |   |   |   |    |    |    |   |   |    |
| C-C-G-A-GT--GT-A-G-AG-GT--G---A--A-A---TT-C-GT-AG--AT-A-TT--C-G--G-A-A-G-A-AC-A-CC---AG--T--G--GC-GAA-G--G-C--G-----G--C-T-C-A---CTG--G--CT-C-G-----G-T---A-C-T--GA--CG-C-T-G--A-GG--T-G-CG-A-AA-G-C---G-TG--GG-        |    |     |   |   |   |   |     |     |     |   |    |   |   |   |    |    |   |   |   |   |   |    |    |    |   |   |    |
| G--AG-C-A-AA-----CA--GG                                                                                                                                                                                                 |    |     |   |   |   |   |     |     |     |   |    |   |   |   |    |    |   |   |   |   |   |    |    |    |   |   |    |
| Bacteria(100);Proteobacteria(100);Alphaproteobacteria(100);Rhodobacterales(74);Rhodobacteraceae(74);unclassified(74);unclassified(74);unclassified(74);unclassified(74);                                                |    |     |   |   |   |   |     |     |     |   |    |   |   |   |    |    |   |   |   |   |   |    |    |    |   |   |    |
| Otu0376                                                                                                                                                                                                                 | 0  | 0   | 0 | 0 | 0 | 0 | 0   | 0   | 0   | 0 | 0  | 0 | 0 | 0 | 0  | 0  | 0 | 0 | 0 | 0 | 0 | 0  | 0  | 0  | 0 | 3 | 0  |
|                                                                                                                                                                                                                         | 4  | 6   | 0 | 0 | 0 | 0 | 0   | 0   | 0   | 0 | 0  | 0 | 0 | 0 | 0  | 0  | 0 | 0 | 0 | 0 | 0 | 0  | 0  | 0  | 0 | 0 | 0  |
|                                                                                                                                                                                                                         | 0  | 0   | 0 | 0 | 0 | 0 | 0   | 0   | 0   | 0 | 0  | 0 | 0 | 0 | 0  | 0  | 0 | 0 | 0 | 0 | 1 | 23 | 0  | 0  | 0 | 0 | 0  |
|                                                                                                                                                                                                                         | 0  | 0   | 0 | 0 | 0 | 0 | 58  | 0   | 0   | 0 | 0  | 0 | 0 | 0 | 0  | 0  | 0 | 0 | 0 | 0 | 0 | 0  | 0  | 0  | 0 | 0 |    |
| M02255_76_000000000-ADUNE_1_1107_8418_16265                                                                                                                                                                             |    |     |   |   |   |   |     |     |     |   |    |   |   |   |    |    |   |   |   |   |   |    |    |    |   |   |    |
| T---AC---GG-AG-GGT-----GCA-A-G-----C-G-T---T-AC-T-CGG-AA-----TC-A-C-T--GG-GC-----GT-----A-A---A-----G-A--G-C-G-----G-G-TA-G-G-T-----AA---G-                                                                             |    |     |   |   |   |   |     |     |     |   |    |   |   |   |    |    |   |   |   |   |   |    |    |    |   |   |    |
| T-C-A-----G-A-A-G--TG--A-AA-TC--C-A-AT-A-G-----CT-C-AA-----C-T-A-T-T-G-A-A-C---T-G-C-T---T-T-----T-GA-A-A---C-----T-G-A--TT-A-C-C---T-A-G-A-A-T-A--T-GG---GA-G-A-----G-G-T-A--GA-T-----GG--A--ATT---T-C-T-G-GT--GT-     |    |     |   |   |   |   |     |     |     |   |    |   |   |   |    |    |   |   |   |   |   |    |    |    |   |   |    |
| A-G-GG-GT--A---A--A-A---TC-C-GT-AG--AG-A-TC--A-G--A-A-G-G-A-AT-A-CC---GA--T--T--GC-GAA-G--G-C--G-----A-T-C-T-A---CTG--G--AA-C-A-----T-T--A-T-T--GA--CG-C-T-G--A-GA--C-G-CG-A-AA-G-C---G-TG--GG-G--AG-C-A-AA---          |    |     |   |   |   |   |     |     |     |   |    |   |   |   |    |    |   |   |   |   |   |    |    |    |   |   |    |
| ----CA--GG                                                                                                                                                                                                              |    |     |   |   |   |   |     |     |     |   |    |   |   |   |    |    |   |   |   |   |   |    |    |    |   |   |    |
| Bacteria(100);Proteobacteria(100);Epsilonproteobacteria(100);Campylobacterales(100);Campylobacteraceae(100);Arcobacter(100);unclassified(100);unclassified(100);unclassified(100);                                      |    |     |   |   |   |   |     |     |     |   |    |   |   |   |    |    |   |   |   |   |   |    |    |    |   |   |    |
| Otu0377                                                                                                                                                                                                                 | 0  | 0   | 0 | 0 | 0 | 0 | 12  | 0   | 0   | 0 | 0  | 0 | 0 | 0 | 0  | 0  | 0 | 0 | 0 | 0 | 0 | 0  | 0  | 0  | 0 | 0 | 0  |
|                                                                                                                                                                                                                         | 0  | 0   | 0 | 0 | 0 | 0 | 16  | 2   | 0   | 0 | 0  | 0 | 0 | 3 | 0  | 0  | 0 | 0 | 0 | 0 | 0 | 4  | 0  | 0  | 0 | 0 | 0  |
|                                                                                                                                                                                                                         | 0  | 0   | 0 | 0 | 0 | 0 | 0   | 0   | 0   | 0 | 0  | 0 | 0 | 0 | 23 | 39 | 0 | 0 | 0 | 0 | 0 | 0  | 0  | 0  | 0 | 0 | 0  |
|                                                                                                                                                                                                                         | 0  | 1   | 1 | 0 | 0 | 0 | 0   | 0   | 6   | 0 | 0  | 0 | 0 | 0 | 0  | 0  | 0 | 0 | 0 | 0 | 7 | 0  | 0  | 0  | 0 | 7 | 17 |
| M02255_76_000000000-ADUNE_1_1107_10448_23341                                                                                                                                                                            |    |     |   |   |   |   |     |     |     |   |    |   |   |   |    |    |   |   |   |   |   |    |    |    |   |   |    |
| C---GG---CT-AA-TTC-----CGT-G-C-----C-A-G---C--AG-C-CGC-GG-----TA-A-T-A--CG-GA-----AG--G-----TC-CG-GG-CG-----T-TA-T-C-C-G-----GA-T-CT-G-T-T-----                                                                         |    |     |   |   |   |   |     |     |     |   |    |   |   |   |    |    |   |   |   |   |   |    |    |    |   |   |    |
| -----AA---G-C-G-T-----G-T-T-G--TG--A-AA-TT--T-A-GG-T-G-----CT-C-AA-----C-A-T-T-T-A-A-C-T---T-G--C-A---G-C-----G--CG-A-A---C-----T-G-T--CA-G-A-C---T-T-G-A-G-T--A---C-AC---GC-A-G-----C-G-C-A--GG-C-----GG--A--ATT---C-  |    |     |   |   |   |   |     |     |     |   |    |   |   |   |    |    |   |   |   |   |   |    |    |    |   |   |    |
| A-T-G-GT--GT-A-G-CG-GT--G---A--A-A---TG-C-TT-AG--AT-A-TC--A-T--G-A-G-G-A-AC-T-CC---GA--T--C--GC-GAA-G--G-C-A-----G--C-C-T-G--CGG--G--AG-T-G-----T-T--A-C-T--GA--CG-C-T-T--A-AG--C-T-CG-A--AG-G-T---G-CG--GG-T--         |    |     |   |   |   |   |     |     |     |   |    |   |   |   |    |    |   |   |   |   |   |    |    |    |   |   |    |
| AT-C-G-AA-----CA--GG                                                                                                                                                                                                    |    |     |   |   |   |   |     |     |     |   |    |   |   |   |    |    |   |   |   |   |   |    |    |    |   |   |    |
| Bacteria(100);Bacteroidetes(100);Bacteroidia(100);Bacteroidales(100);Prevotellaceae(100);unclassified(100);unclassified(100);unclassified(100);unclassified(100);                                                       |    |     |   |   |   |   |     |     |     |   |    |   |   |   |    |    |   |   |   |   |   |    |    |    |   |   |    |
| Otu0378                                                                                                                                                                                                                 | 0  | 0   | 0 | 0 | 0 | 0 | 0   | 0   | 0   | 0 | 0  | 0 | 0 | 0 | 0  | 0  | 0 | 0 | 0 | 0 | 9 | 0  | 0  | 0  | 0 | 0 | 0  |
|                                                                                                                                                                                                                         | 0  | 0   | 0 | 0 | 0 | 0 | 0   | 0   | 0   | 0 | 0  | 0 | 0 | 0 | 0  | 0  | 0 | 0 | 0 | 0 | 0 | 0  | 51 | 0  | 0 | 0 | 0  |
|                                                                                                                                                                                                                         | 0  | 0   | 0 | 0 | 0 | 0 | 0   | 0   | 0   | 0 | 0  | 0 | 0 | 0 | 0  | 0  | 0 | 0 | 0 | 0 | 0 | 0  | 0  | 0  | 0 | 0 | 0  |
|                                                                                                                                                                                                                         | 19 | 0   | 0 | 0 | 0 | 0 | 4   | 0   | 0   | 0 | 0  | 0 | 0 | 0 | 0  | 0  | 0 | 0 | 0 | 0 | 0 | 0  | 0  | 0  | 0 | 0 |    |
| M02255_77_000000000-ADUT3_1_1116_10664_15258                                                                                                                                                                            |    |     |   |   |   |   |     |     |     |   |    |   |   |   |    |    |   |   |   |   |   |    |    |    |   |   |    |
| T---AC---GA-AG-GGG-----GCT-A-G-----C-G-T---T-GT-T-CGG-AA-----TT-A-C-T--GG-GC-----GT-A---AA-GC-GC-AC-----G-TA-G-G-C-G-----G--A-TA-T-T-T-----                                                                             |    |     |   |   |   |   |     |     |     |   |    |   |   |   |    |    |   |   |   |   |   |    |    |    |   |   |    |
| -----AA---G-T-T-A-----G-G-G--G--TG--A-AA-TC--C-C-AG-G-G----CT-C-AA-----C-C-C-T-G-G-A-A-C---T-G--C-C---T-C-----T-AA-T-A---C-----T-G-G--GT--A-T-C---T-A-G-A-G-T--C---C-GA---GA-G-A-----G-G-T-G---AG-T-----GG--A--ATT---C- |    |     |   |   |   |   |     |     |     |   |    |   |   |   |    |    |   |   |   |   |   |    |    |    |   |   |    |
| C-G-A-GT--GT-A-G-AG-GT--G---A--A-A---TT-C-GT-AG--AT-A-TT--C-G--G-A-G-G-A-AC-A-CC---AG--T--G--GC-GAA-G--G-C--G-----G--C-T-C-A---CTG--G--CT-C-G-----G-T---A-C-T--GA--CG-C-T-G--A-GG--T-G-CG-A-AA-G-C---G-TG--GG-          |    |     |   |   |   |   |     |     |     |   |    |   |   |   |    |    |   |   |   |   |   |    |    |    |   |   |    |
| G--AG-C-A-AA-----CA--GG                                                                                                                                                                                                 |    |     |   |   |   |   |     |     |     |   |    |   |   |   |    |    |   |   |   |   |   |    |    |    |   |   |    |
| Bacteria(100);Proteobacteria(100);Alphaproteobacteria(100);Rhizobiales(100);unclassified(73);unclassified(73);unclassified(73);unclassified(73);unclassified(73);                                                       |    |     |   |   |   |   |     |     |     |   |    |   |   |   |    |    |   |   |   |   |   |    |    |    |   |   |    |
| Otu0379                                                                                                                                                                                                                 | 0  | 222 | 0 | 0 | 0 | 0 | 125 | 130 | 416 | 0 | 0  | 0 | 0 | 0 | 0  | 1  | 0 | 0 | 0 | 0 | 0 | 0  | 0  | 0  | 0 | 0 | 0  |
|                                                                                                                                                                                                                         | 0  | 0   | 0 | 0 | 0 | 0 | 0   | 0   | 0   | 0 | 73 | 0 | 0 | 0 | 0  | 0  | 0 | 0 | 0 | 0 | 0 | 0  | 0  | 0  | 0 | 0 | 0  |
|                                                                                                                                                                                                                         | 0  | 0   | 0 | 0 | 0 | 0 | 0   | 0   | 0   | 0 | 0  | 0 | 0 | 0 | 0  | 0  | 0 | 0 | 0 | 0 | 0 | 0  | 0  | 0  | 0 | 0 | 0  |
|                                                                                                                                                                                                                         | 0  | 0   | 0 | 0 | 0 | 0 | 0   | 0   | 0   | 0 | 0  | 0 | 0 | 0 | 0  | 0  | 0 | 0 | 0 | 0 | 0 | 0  | 0  | 57 | 0 | 0 |    |
| M02255_77_000000000-ADUT3_1_1106_24579_10771                                                                                                                                                                            |    |     |   |   |   |   |     |     |     |   |    |   |   |   |    |    |   |   |   |   |   |    |    |    |   |   |    |
| T---AC---GT-AG-GTG-----GCG-A-G-----C-G-T---T-AT-C-CGG-AT-----TT-A-C-T--GG-GT-----GT-A---AA-GG-GC-GC-----G-TA-G-G-C-G-----G--G-AA-T-G-C-----                                                                             |    |     |   |   |   |   |     |     |     |   |    |   |   |   |    |    |   |   |   |   |   |    |    |    |   |   |    |
| -----AA---G-T-C-A-----G-A-T--G--TG--A-AA-TC--C-A-GG-G-G----CT-T-AA-----C-C-C-T-T-G-A-A-C---T-G--C-A---T-T-----T-GA-A-A---C-----T-G-T--AT--T-T-C---T-T-G-A-G-T--G---T-CG---GA-G-A-----G-G-T-T---GA-C-----GG--A--ATT---C- |    |     |   |   |   |   |     |     |     |   |    |   |   |   |    |    |   |   |   |   |   |    |    |    |   |   |    |
| C-T-A-GT--GT-A-G-CG-GT--G---A--A-A---TG-C-GT-AG--AT-A-TT--A-G--G-A-G-G-A-AC-A-CC---AG--T--G--GC-GAA-G--G-C--G-----G--T-C-A-A---CTG--G--AC-G-A-----T-A--A-C-T--GA--CG-C-T-G--A-GG--C-G-CG-A-AA-G-C---G-TG--GG-           |    |     |   |   |   |   |     |     |     |   |    |   |   |   |    |    |   |   |   |   |   |    |    |    |   |   |    |
| G--AG-C-A-AA-----CA--GG                                                                                                                                                                                                 |    |     |   |   |   |   |     |     |     |   |    |   |   |   |    |    |   |   |   |   |   |    |    |    |   |   |    |
| Bacteria(100);Firmicutes(85);Clostridia(85);Clostridiales(85);unclassified(85);unclassified(85);unclassified(85);unclassified(85);unclassified(85);                                                                     |    |     |   |   |   |   |     |     |     |   |    |   |   |   |    |    |   |   |   |   |   |    |    |    |   |   |    |



[illegible]



|                                                                                                                                                                                                                  |    |     |    |   |    |    |    |    |    |    |    |    |   |    |    |    |    |    |    |   |    |   |     |     |     |   |     |     |
|------------------------------------------------------------------------------------------------------------------------------------------------------------------------------------------------------------------|----|-----|----|---|----|----|----|----|----|----|----|----|---|----|----|----|----|----|----|---|----|---|-----|-----|-----|---|-----|-----|
| Otu0385                                                                                                                                                                                                          | 0  | 22  | 0  | 0 | 0  | 0  | 3  | 34 | 26 | 0  | 0  | 0  | 0 | 0  | 0  | 0  | 0  | 0  | 0  | 0 | 0  | 0 | 0   | 0   | 0   | 0 | 0   |     |
|                                                                                                                                                                                                                  | 0  | 0   | 0  | 0 | 0  | 0  | 0  | 0  | 0  | 0  | 0  | 0  | 0 | 0  | 0  | 0  | 0  | 0  | 0  | 0 | 4  | 0 | 0   | 0   | 0   | 0 | 0   |     |
|                                                                                                                                                                                                                  | 0  | 0   | 0  | 0 | 0  | 0  | 0  | 0  | 0  | 0  | 0  | 0  | 0 | 0  | 0  | 0  | 0  | 0  | 23 | 0 | 0  | 0 | 0   | 0   | 0   | 0 | 0   |     |
|                                                                                                                                                                                                                  | 0  | 0   | 0  | 0 | 0  | 2  | 0  | 0  | 0  | 0  | 23 | 0  | 0 | 0  | 0  | 0  | 0  | 0  | 0  | 0 | 0  | 0 | 0   | 0   | 0   | 0 | 0   |     |
| M02255_76_000000000-ADUNE_1_2107_13226_22260 T---CG---GC-TA-ACT-----CCG-T-G----C-C-A--G--CA-G-CCG-CG-----GT-A-A-T-AC-GG-----AG-G----AT-CC-GA-GC-----GTTA-T-C-C-G-----G--ATTT-G-T-T-----                          |    |     |    |   |    |    |    |    |    |    |    |    |   |    |    |    |    |    |    |   |    |   |     |     |     |   |     |     |
| -----AA---G-T-C-A-----G-T-T--G--TG--A-AA-GT--T-T-GC-G-G----CT-C-AA-----C-C-G-T-A-A-A-A-T---T-G-C-A--G-T-----T-GA-A-A--C-----T-G-G-CA-G-T-C---T-T-G-A-G-T--A--C-AG----TA-G-A-----G-G-T-G--GG-C-----GG--A-ATT---C- |    |     |    |   |    |    |    |    |    |    |    |    |   |    |    |    |    |    |    |   |    |   |     |     |     |   |     |     |
| G-T-G-GT--GT-A-G-CG-GT--G---A-A-A--TG-C-TT-AG--AT-A-TC-A-C--G-A-A-G-A-AC-T-CC--GA--T-T--GC-GAA-G--G-C-A-----G-C-T-C-A--CTA-G--AC-T-G-----T-T---A-C-T-GA-CA-C-T-G--A-TG--C-T-CG-A--AA-G-T---G-TG--GG-T--          |    |     |    |   |    |    |    |    |    |    |    |    |   |    |    |    |    |    |    |   |    |   |     |     |     |   |     |     |
| AT-C-A-AA-----CA--GG Bacteria(100);Bacteroidetes(100);Bacteroidia(100);Bacteroidales(100);Bacteroidaceae(100);Bacteroides(100);unclassified(100);unclassified(100);unclassified(100);                            |    |     |    |   |    |    |    |    |    |    |    |    |   |    |    |    |    |    |    |   |    |   |     |     |     |   |     |     |
| Otu0386                                                                                                                                                                                                          | 0  | 10  | 0  | 0 | 0  | 0  | 0  | 0  | 10 | 15 | 0  | 0  | 0 | 14 | 8  | 1  | 10 | 3  | 0  | 0 | 0  | 0 | 221 | 184 | 1   | 1 | 0   | 4   |
|                                                                                                                                                                                                                  | 0  | 0   | 6  | 0 | 0  | 6  | 17 | 10 | 0  | 13 | 0  | 5  | 0 | 7  | 0  | 6  | 0  | 0  | 12 | 0 | 5  | 0 | 0   | 0   | 1   | 0 | 0   | 0   |
|                                                                                                                                                                                                                  | 0  | 0   | 1  | 0 | 7  | 0  | 1  | 1  | 0  | 1  | 3  | 0  | 0 | 2  | 2  | 0  | 0  | 27 | 4  | 0 | 11 | 3 | 29  | 25  | 139 | 0 | 134 | 105 |
|                                                                                                                                                                                                                  | 47 | 119 | 21 | 0 | 69 | 20 | 0  | 3  | 0  | 14 | 0  | 3  | 0 | 11 | 0  | 0  | 2  | 4  | 7  | 0 | 0  | 0 | 0   | 0   | 0   | 0 | 0   | 0   |
| M02255_76_000000000-ADUNE_1_2105_12237_13844 T---A---AG-CA-CCG-----GCT-A-A-----C----T---C--TG-T-GCC-AG-----CA-G--C-C-GC-GG-----TA-A---TA-CA-GA-GG-----G-TG-C--G-A-----G--C-TT-G-T-T-----                         |    |     |    |   |    |    |    |    |    |    |    |    |   |    |    |    |    |    |    |   |    |   |     |     |     |   |     |     |
| --AA---G-T-C-G-----G-A-T--G--TG--A-AA-TC--C-C-CG-A-G----CT-T-AA-----C-T-T-G-G-G-A--A-T---T-G--C-A--T-T-----C-GA-T-A--C-----T-G-G-GA-A-G-C---T-A-G-A-G-T--A--T-GG---GA-G-A-----G-G-A-T--GG-T-----AG--A-ATT---C-C- |    |     |    |   |    |    |    |    |    |    |    |    |   |    |    |    |    |    |    |   |    |   |     |     |     |   |     |     |
| A-G-GT--GT-A-G-CG-GT--G---A-A-A--TG-C-GT-AG--AG-A-TC-T-G--G-A-G-G-A-AT-A-CC--GA--T-G--GC-GAA-G--G-C-A-----G-C-C-A-T--CTG-G--CC-T-A-----A-T---A-C-T-GA-CG-C-T-G--A-GG--T-A-CG-A--AA-G-C---A-TG--GG-G--            |    |     |    |   |    |    |    |    |    |    |    |    |   |    |    |    |    |    |    |   |    |   |     |     |     |   |     |     |
| AG-C-A-AA-----CA--GG Bacteria(100);Proteobacteria(100);Gammaproteobacteria(100);Pseudomonadales(100);Moraxellaceae(100);Acinetobacter(100);unclassified(100);unclassified(100);unclassified(100);                |    |     |    |   |    |    |    |    |    |    |    |    |   |    |    |    |    |    |    |   |    |   |     |     |     |   |     |     |
| Otu0387                                                                                                                                                                                                          | 0  | 0   | 0  | 0 | 0  | 0  | 0  | 0  | 0  | 0  | 0  | 0  | 0 | 0  | 0  | 0  | 0  | 0  | 0  | 0 | 0  | 0 | 0   | 0   | 0   | 0 | 0   | 0   |
|                                                                                                                                                                                                                  | 0  | 0   | 2  | 0 | 0  | 0  | 0  | 0  | 0  | 19 | 14 | 0  | 0 | 0  | 0  | 13 | 0  | 0  | 0  | 0 | 0  | 0 | 0   | 0   | 0   | 0 | 0   | 0   |
|                                                                                                                                                                                                                  | 0  | 0   | 0  | 0 | 0  | 0  | 0  | 0  | 0  | 0  | 0  | 0  | 0 | 0  | 0  | 0  | 0  | 0  | 29 | 0 | 0  | 0 | 0   | 0   | 0   | 0 | 0   | 0   |
|                                                                                                                                                                                                                  | 0  | 0   | 0  | 0 | 0  | 0  | 0  | 0  | 0  | 0  | 0  | 0  | 0 | 0  | 0  | 0  | 0  | 0  | 0  | 0 | 0  | 0 | 0   | 0   | 0   | 0 | 0   | 0   |
| M02255_77_000000000-ADUT3_1_1112_8371_16097 C---AC---GT-AG-GGG-----GCG-A-G-----C-G--T---T--GT-C-CGG-AA-----TT-A--T-T--GG-GC-----GT-A---AA-GA-GC-TC-----G-TA-G-G-C-G-----G--C-TC-A-G-T-----                       |    |     |    |   |    |    |    |    |    |    |    |    |   |    |    |    |    |    |    |   |    |   |     |     |     |   |     |     |
| AA---G-T-C-G-----G-G-T--G--TG--A-AA-CC--C-T-CA-G-G----CT-C-AA-----C-C-T-G-G-G-GA-----C-G-CC-A--C-C-----C-GA-T-A--C-----T-G-C--TG-TG-G-C---T-A-G-A-G-T--C---C-AG----TA-G-G-----G-G-A-G--TG-T-----GG--A-ATT---C-C- |    |     |    |   |    |    |    |    |    |    |    |    |   |    |    |    |    |    |    |   |    |   |     |     |     |   |     |     |
| C-G-GT--GT-A-G-CG-GT--G---A-A-A--TG-C-GC-AG--AT-A-TC--G-G--G-A-G-G-A-AC-A-CC--AG--C-G--GC-GAA-G--G-C-G-----G-C-A-C-T--CTG-G--GC-T-G-----G-T---A-C-T-GA-CG-C-T-G--A-GG--A-G-CG-A--AA-G-C---G-TG--GG-T--           |    |     |    |   |    |    |    |    |    |    |    |    |   |    |    |    |    |    |    |   |    |   |     |     |     |   |     |     |
| AG-C-A-AA-----CA--GG Bacteria(100);Actinobacteria(100);Actinobacteria(100);Acidimicrobiae(100);Acidimicrobiales(100);Acidimicrobineae(100);unclassified(100);unclassified(100);unclassified(100);                |    |     |    |   |    |    |    |    |    |    |    |    |   |    |    |    |    |    |    |   |    |   |     |     |     |   |     |     |
| Otu0388                                                                                                                                                                                                          | 0  | 0   | 0  | 0 | 0  | 0  | 0  | 0  | 0  | 0  | 0  | 0  | 0 | 0  | 0  | 0  | 0  | 0  | 0  | 0 | 0  | 0 | 0   | 0   | 0   | 0 | 0   | 0   |
|                                                                                                                                                                                                                  | 0  | 0   | 28 | 0 | 0  | 0  | 0  | 0  | 0  | 0  | 0  | 54 | 0 | 45 | 0  | 0  | 0  | 0  | 0  | 0 | 0  | 0 | 0   | 0   | 6   | 0 | 0   | 0   |
|                                                                                                                                                                                                                  | 0  | 0   | 0  | 0 | 0  | 0  | 0  | 0  | 0  | 0  | 0  | 0  | 0 | 0  | 14 | 0  | 0  | 0  | 36 | 0 | 0  | 0 | 0   | 0   | 0   | 0 | 0   | 0   |
|                                                                                                                                                                                                                  | 21 | 0   | 0  | 0 | 0  | 0  | 7  | 4  |    |    |    |    |   |    |    |    |    |    |    |   |    |   |     |     |     |   |     |     |



|                                                                                                                                                                                                                              |    |    |    |   |     |    |    |   |    |    |   |     |    |    |    |   |   |    |    |    |   |   |   |    |     |   |   |
|------------------------------------------------------------------------------------------------------------------------------------------------------------------------------------------------------------------------------|----|----|----|---|-----|----|----|---|----|----|---|-----|----|----|----|---|---|----|----|----|---|---|---|----|-----|---|---|
| Otu0390                                                                                                                                                                                                                      | 0  | 0  | 0  | 0 | 0   | 0  | 0  | 0 | 0  | 0  | 0 | 0   | 0  | 0  | 1  | 0 | 0 | 0  | 0  | 0  | 0 | 0 | 0 | 0  | 0   | 0 | 0 |
|                                                                                                                                                                                                                              | 0  | 0  | 0  | 0 | 0   | 0  | 0  | 0 | 0  | 0  | 0 | 34  | 0  | 77 | 0  | 0 | 0 | 0  | 0  | 0  | 0 | 0 | 0 | 0  | 0   | 0 | 0 |
|                                                                                                                                                                                                                              | 0  | 0  | 0  | 0 | 0   | 0  | 0  | 0 | 0  | 0  | 0 | 0   | 0  | 6  | 0  | 0 | 0 | 0  | 0  | 0  | 0 | 0 | 0 | 0  | 0   | 0 | 0 |
|                                                                                                                                                                                                                              | 0  | 0  | 81 | 0 | 0   | 0  | 0  | 0 | 0  | 0  | 0 | 5   | 31 | 1  | 0  | 0 | 0 | 0  | 0  | 0  | 0 | 0 | 0 | 0  | 0   | 0 | 0 |
| M02255_77_000000000-ADUT3_1_1119_21401_9624 T---AC---GT-AG-GTG-----GCG-A-G-----C--G--T---T--AT-C-CGG-AA-----TT-A--C-T--GG-GT-----GT--A----AA-GG-GC-GT-----G-TA-G-G-C-G-----G--C-AC-T-G-T-----AA--                            |    |    |    |   |     |    |    |   |    |    |   |     |    |    |    |   |   |    |    |    |   |   |   |    |     |   |   |
| ---G-T-C-A-----G-A-T--G--TG--A-AA-TC--T-C-CC-G-G----CT-C-AA-----C-C-G-G-G-A-G-C-G---T-G--C-A---T-C-----T--GA-T-A---C-----T--G-C--AG--T-A-C---T-T-G-A-G-T--G---A-TA----GA-G-G-----G-G-A-A---AG-C-----GG--A--ATT---C-C-T-A-    |    |    |    |   |     |    |    |   |    |    |   |     |    |    |    |   |   |    |    |    |   |   |   |    |     |   |   |
| GT--GT-A-G-CG-GT--A---A--A---TG-C-GT-AG--AT-A-TT--A-G--G-A-G-G-A-AC-A-CC---AG--T--G--GC-GAA-G--G-C--G-----G--C-T-T-T---CTG--G--CT-A-T-----T-A---A-C-T--GA--CG-C-T-G--A-GG--C-G-CG-A--AA-G-C---G-TG--GG-G--AG-C-              |    |    |    |   |     |    |    |   |    |    |   |     |    |    |    |   |   |    |    |    |   |   |   |    |     |   |   |
| A-AA-----CA--GG Bacteria(100);Firmicutes(100);Clostridia(100);Clostridiales(100);Ruminococcaceae(100);Fastidiosipila(92);unclassified(92);unclassified(92);unclassified(92);                                                 |    |    |    |   |     |    |    |   |    |    |   |     |    |    |    |   |   |    |    |    |   |   |   |    |     |   |   |
| Otu0391                                                                                                                                                                                                                      | 0  | 0  | 0  | 0 | 0   | 0  | 0  | 0 | 0  | 0  | 0 | 0   | 0  | 0  | 0  | 0 | 0 | 0  | 0  | 0  | 0 | 0 | 0 | 0  | 0   | 0 | 0 |
|                                                                                                                                                                                                                              | 0  | 0  | 0  | 0 | 114 | 0  | 0  | 0 | 0  | 0  | 0 | 0   | 0  | 0  | 0  | 0 | 0 | 0  | 0  | 0  | 0 | 0 | 0 | 0  | 0   | 0 | 0 |
|                                                                                                                                                                                                                              | 0  | 0  | 0  | 0 | 0   | 0  | 0  | 0 | 0  | 0  | 0 | 0   | 0  | 0  | 0  | 0 | 0 | 0  | 0  | 0  | 0 | 0 | 0 | 0  | 0   | 0 | 0 |
|                                                                                                                                                                                                                              | 22 | 0  | 0  | 0 | 0   | 0  | 4  | 0 | 0  | 0  | 0 | 0   | 0  | 0  | 0  | 0 | 0 | 0  | 0  | 0  | 0 | 0 | 0 | 0  | 0   | 0 | 0 |
| M02255_77_000000000-ADUT3_1_2113_10509_17251 T---AC---GT-AG-GGG-----GCA-A-G-----C--G--T---T--AT-C-CGG-AT-----TT-A--C-T--GG-GT-----GT--A----AA-TG-GA-GC-----G-CA-G-A-C-G-----G--C-TT-G-G-C-----                               |    |    |    |   |     |    |    |   |    |    |   |     |    |    |    |   |   |    |    |    |   |   |   |    |     |   |   |
| -----AA---G-T-C-T-----G-A-A-G--TG--A-AA-GC--C-C-GG-G-G----CT-T-AA-----C-C-C-C-G-G-G--A-C---T-G--C-T---T--T-----G--GA-A-A---C-----T--G-T--GA--A-G-C---T-A-G-A-G-T--G---T-CG---GA-G-A-----G-G-T-A--AG-T-----GG--A--ATT---      |    |    |    |   |     |    |    |   |    |    |   |     |    |    |    |   |   |    |    |    |   |   |   |    |     |   |   |
| C-C-C-A-GT--GT-A-G-CG-GT--G---A--A---TG-C-GT-AG--AT-A-TT--G-G--G-A-G-G-A-AC-A-CC---GG--T--G--GC-GAA-G--G-C--G-----G--C-T-T-A---CTG--G--AC-G-A-----T-A---A-C-T--GA--CG-T-T-G--A-GG--C-T-CG-A--AG-G-C---G-TG--                 |    |    |    |   |     |    |    |   |    |    |   |     |    |    |    |   |   |    |    |    |   |   |   |    |     |   |   |
| GG-G--AG-C-A-AA-----CA--GG Bacteria(100);Firmicutes(100);Clostridia(100);Clostridiales(100);Lachnospiraceae(100);unclassified(98);unclassified(98);unclassified(98);unclassified(98);                                        |    |    |    |   |     |    |    |   |    |    |   |     |    |    |    |   |   |    |    |    |   |   |   |    |     |   |   |
| Otu0392                                                                                                                                                                                                                      | 0  | 87 | 0  | 0 | 0   | 0  | 65 | 0 | 44 | 0  | 0 | 0   | 0  | 0  | 0  | 0 | 0 | 0  | 0  | 0  | 0 | 0 | 0 | 0  | 0   | 0 | 0 |
|                                                                                                                                                                                                                              | 0  | 0  | 0  | 0 | 0   | 0  | 0  | 0 | 0  | 0  | 0 | 0   | 0  | 0  | 0  | 0 | 0 | 0  | 0  | 0  | 0 | 0 | 0 | 0  | 0   | 0 | 0 |
|                                                                                                                                                                                                                              | 0  | 0  | 0  | 0 | 0   | 0  | 0  | 0 | 0  | 0  | 0 | 0   | 0  | 0  | 0  | 0 | 0 | 0  | 0  | 0  | 0 | 0 | 0 | 0  | 0   | 0 | 0 |
|                                                                                                                                                                                                                              | 0  | 0  | 0  | 0 | 0   | 0  | 0  | 0 | 0  | 0  | 0 | 0   | 0  | 0  | 0  | 0 | 0 | 0  | 0  | 0  | 0 | 0 | 4 | 13 | 135 | 0 | 0 |
| M02255_77_000000000-ADUT3_1_1103_8204_10843 T---AC---GT-AG-GGG-----GCA-A-G-----C--G--T---T--AT-C-CGG-AT-----TT-A--C-T--GG-GT-----GT--A----AA-GG-GA-GC-----G-CA-G-G-C-G-----G--T-GC-G-G-C-----                                |    |    |    |   |     |    |    |   |    |    |   |     |    |    |    |   |   |    |    |    |   |   |   |    |     |   |   |
| AA---G-T-C-A-----G-A-T--G--TG--A-AA-AC--C-C-GG-G-G----CT-C-AA-----C-C-C-C-G-G-G--A-C---T-G--C-A---T--T-----T--GA-A-A---C-----T--G-T--CG--G-A-C---T-A-G-A-G-T--G---C-CG---GA-G-A-----G-G-T-A--AG-T-----GG--A--ATT---C-C-T-    |    |    |    |   |     |    |    |   |    |    |   |     |    |    |    |   |   |    |    |    |   |   |   |    |     |   |   |
| A-GT--GT-A-G-CG-GT--G---A--A---TG-C-GT-AG--AT-A-TT--A-G--G-A-G-G-A-AC-A-CC---AG--T--G--GC-GAA-G--G-C--G-----G--C-T-T-A---CTG--G--AC-G-G-----T-A---A-C-T--GA--CG-C-T-G--A-GG--C-T-CG-A--AA-G-C---G-TG--GG-G--                 |    |    |    |   |     |    |    |   |    |    |   |     |    |    |    |   |   |    |    |    |   |   |   |    |     |   |   |
| AG-C-A-AA-----CA--GG Bacteria(100);Firmicutes(100);Clostridia(100);Clostridiales(100);Lachnospiraceae(100);unclassified(100);unclassified(100);unclassified(100);unclassified(100);                                          |    |    |    |   |     |    |    |   |    |    |   |     |    |    |    |   |   |    |    |    |   |   |   |    |     |   |   |
| Otu0393                                                                                                                                                                                                                      | 0  | 0  | 0  | 0 | 0   | 0  | 0  | 0 | 0  | 0  | 0 | 0   | 0  | 0  | 0  | 0 | 0 | 0  | 0  | 0  | 0 | 0 | 0 | 0  | 0   | 0 | 0 |
|                                                                                                                                                                                                                              | 0  | 0  | 0  | 0 | 0   | 0  | 0  | 0 | 0  | 0  | 0 | 0   | 0  | 0  | 0  | 0 | 0 | 0  | 0  | 0  | 0 | 0 | 0 | 0  | 0   | 0 | 0 |
|                                                                                                                                                                                                                              | 0  | 0  | 0  | 0 | 0   | 0  | 0  | 0 | 0  | 0  | 0 | 0   | 0  | 0  | 28 | 0 | 0 | 0  | 0  | 0  | 0 | 0 | 0 | 0  | 0   | 0 | 0 |
|                                                                                                                                                                                                                              | 0  | 0  | 0  | 0 | 0   | 0  | 0  | 0 | 0  | 0  | 0 | 0   | 0  | 0  | 0  | 0 | 0 | 42 | 0  | 0  | 0 | 0 | 0 | 0  | 0   | 0 | 0 |
| M02255_77_000000000-ADUT3_1_1109_28563_12093 T---AC---AG-AG-GCC-----ACG-A-G-----C--G--T---T--AG-G-CGG-AA-----TC-A--C-T--GG-GC-----TT--A----AA-GC-GT-GT-----G-TA-G-G-T-G-----G--A-TG-A-G-T-----                               |    |    |    |   |     |    |    |   |    |    |   |     |    |    |    |   |   |    |    |    |   |   |   |    |     |   |   |
| -----AA---G-T-A-C-----C-T-T--G--TG--A-AA-TC--C-C-AC-G-G----CT-C-AA-----C-C-G-T-G-G-A--A-C---T-G--C-T---T--G-----G--TA-T-A---C-----T--G-C--TT--G-T-C---T-T-G-A-G-G--C---A-CT-----CA-G-G-----G-G-C-G--AG-C-----GG--A--ACA---G- |    |    |    |   |     |    |    |   |    |    |   |     |    |    |    |   |   |    |    |    |   |   |   |    |     |   |   |
| A-T-G-GT--GG-A-G-CG-GT--G---A--A---TG-C-GT-AG--AT-A-TC--A-T--C-T-G-G-A-AC-G-CC---AA--T--G--GT-GAA-G--A-C--A-----G--C-T-C-G---CTG--G--GG-G-T-----G-T---A-C-T--GA--CA-C-T-G--A-GA--C-A-CG-A--AA-G-C---C-AG--GG-                |    |    |    |   |     |    |    |   |    |    |   |     |    |    |    |   |   |    |    |    |   |   |   |    |     |   |   |
| G--AG-C-A-AA-----CG--GG Bacteria(100);Planctomycetes(100);Phycisphaerae(100);WD2101(100);unclassified(100);unclassified(100);unclassified(100);unclassified(100);unclassified(100);                                          |    |    |    |   |     |    |    |   |    |    |   |     |    |    |    |   |   |    |    |    |   |   |   |    |     |   |   |
| Otu0394                                                                                                                                                                                                                      | 0  | 0  | 0  | 0 | 0   | 15 | 0  | 0 | 0  | 0  | 0 | 0   | 0  | 0  | 0  | 0 | 0 | 0  | 0  | 0  | 0 | 0 | 0 | 0  | 0   | 0 | 0 |
|                                                                                                                                                                                                                              | 0  | 0  | 0  | 0 | 0   | 0  | 0  | 0 | 0  | 0  | 0 | 0   | 0  | 0  | 0  | 0 | 0 | 0  | 0  | 0  | 0 | 1 | 0 | 0  | 0   | 0 | 0 |
|                                                                                                                                                                                                                              | 0  | 0  | 0  | 0 | 0   | 0  | 0  | 0 | 0  | 0  | 3 | 0   | 0  | 11 | 0  | 0 | 0 | 0  | 38 | 30 | 0 | 0 | 0 | 0  | 0   | 4 | 0 |
|                                                                                                                                                                                                                              | 0  | 0  | 0  | 0 | 7   | 31 | 0  | 4 | 0  | 88 | 0 | 102 | 0  | 0  | 3  | 0 | 0 | 0  | 0  | 0  | 0 | 0 | 0 | 0  | 0   | 0 | 0 |
| M02255_76_000000000-ADUNE_1_1103_5413_15978 C---GG---CT-AA-TTC-----CGT-G-C-----C--A--G---C--AG-C-CGC-GG-----TA-A--T-A--CG-GA-----AG--G----TC-CA-GG-CG-----T-TA-T-C-C-G-----GA-T-TT-A-T-T-----AA--                            |    |    |    |   |     |    |    |   |    |    |   |     |    |    |    |   |   |    |    |    |   |   |   |    |     |   |   |
| --G-C-G-T-----G-T-T--G--TG--A-AA-TG--T-A-GA-T-G-----CT-C-AA-----C-A-T-C-T-G-A--A-T---T-G--C-A---G-C-----G--CG-A-A---C-----T--G-G--AA--G-A-C---T-T-G-A-G-T--G---C-AC-----AC-A-A-----C-G-T-A---GG-C-----GG--A--ATT---C-A-T-G-  |    |    |    |   |     |    |    |   |    |    |   |     |    |    |    |   |   |    |    |    |   |   |   |    |     |   |   |
| GT--GT-A-G-CG-GT--G---A--A---TG-C-TT-AG--AT-A-TT--A-T--G-A-A-G-A-AC-T-CC---GA--T--T--GC-GAA-G--G-C--A-----G--C-T-T-A---CGG--G--AG-T-G-----T-A---A-C-T--GA--CG-C-T-T--A-AG--C-T-CG-A--AG-G-T---G-CG--GG-T--AT-C-              |    |    |    |   |     |    |    |   |    |    |   |     |    |    |    |   |   |    |    |    |   |   |   |    |     |   |   |
| G-AA-----CA--GG Bacteria(100);Bacteroidetes(100);Bacteroidia(100);Bacteroidales(100);Prevotellaceae(100);unclassified(100);unclassified(100);unclassified(100);unclassified(100);                                            |    |    |    |   |     |    |    |   |    |    |   |     |    |    |    |   |   |    |    |    |   |   |   |    |     |   |   |



|                                                                                                                                                                                                                    |                                                                                                                                                                                |   |   |    |   |   |    |   |   |    |   |   |   |   |    |   |   |   |   |   |    |   |   |    |   |   |   |
|--------------------------------------------------------------------------------------------------------------------------------------------------------------------------------------------------------------------|--------------------------------------------------------------------------------------------------------------------------------------------------------------------------------|---|---|----|---|---|----|---|---|----|---|---|---|---|----|---|---|---|---|---|----|---|---|----|---|---|---|
| Otu0395                                                                                                                                                                                                            | 0                                                                                                                                                                              | 0 | 0 | 0  | 0 | 0 | 0  | 0 | 0 | 0  | 0 | 0 | 0 | 0 | 0  | 0 | 0 | 0 | 0 | 0 | 0  | 0 | 0 | 0  | 0 | 0 |   |
|                                                                                                                                                                                                                    | 0                                                                                                                                                                              | 0 | 0 | 0  | 0 | 0 | 0  | 0 | 0 | 0  | 1 | 0 | 1 | 0 | 0  | 0 | 1 | 0 | 0 | 2 | 17 | 0 | 3 | 2  | 0 | 0 | 0 |
|                                                                                                                                                                                                                    | 0                                                                                                                                                                              | 0 | 0 | 0  | 0 | 5 | 0  | 0 | 8 | 0  | 0 | 0 | 0 | 0 | 0  | 0 | 0 | 0 | 0 | 0 | 0  | 0 | 0 | 0  | 0 | 0 |   |
|                                                                                                                                                                                                                    | 0                                                                                                                                                                              | 0 | 0 | 0  | 0 | 0 | 0  | 0 | 0 | 0  | 0 | 0 | 0 | 0 | 0  | 0 | 0 | 0 | 0 | 0 | 0  | 0 | 0 | 0  | 0 | 0 |   |
| M02255_76_000000000-ADUNE_1_2107_23064_20238                                                                                                                                                                       | C---TA--AC-TC-CGT-----GCC-A-G----C---A--G--CC-G-CGG-TA-----AT-A--C-G--GA-GG-----GT-G---CA--A-GC-G-----T-TA-A-T-C-G-----G--T-TT-G-T-T-----                                      |   |   |    |   |   |    |   |   |    |   |   |   |   |    |   |   |   |   |   |    |   |   |    |   |   |   |
| --AA---G-T-C-A-----G-A-T--G--TG--A-AA-TC--C-C-CG-C-G----CT-T-AA-----C-G-T-G-G-G-A--A-C---T-G--C-A--T-T-----T-GA-A-A--C-----T-G-G--CA--A-G-C---T-A-G-A-G-T-C---T-TG----TA-G-A-----G-G-G-G--GG-T----AG--A-ATT---C-C- |                                                                                                                                                                                |   |   |    |   |   |    |   |   |    |   |   |   |   |    |   |   |   |   |   |    |   |   |    |   |   |   |
| A-G-GT--GT-A-G-CG-GT--G---A--A-A---TG-C-GT-AG--AG-A-TC--T-G--G-A-G-G-A-AT-A-CC--GG--T-G--GC-GAA-G-G-C-G-----G--C-C-C-C--CTG--G--AC-A-A-----A-G--A-C-T-GA--CG-C-T-C--A-GG--T-G-CG-A--AA-G-C--G-TG--GG-G--           |                                                                                                                                                                                |   |   |    |   |   |    |   |   |    |   |   |   |   |    |   |   |   |   |   |    |   |   |    |   |   |   |
| AG-C-A-AA-----CA--GG                                                                                                                                                                                               | Bacteria(100);Proteobacteria(100);Gammaproteobacteria(100);Enterobacteriales(100);Enterobacteriaceae(100);unclassified(85);unclassified(85);unclassified(85);unclassified(85); |   |   |    |   |   |    |   |   |    |   |   |   |   |    |   |   |   |   |   |    |   |   |    |   |   |   |
| Otu0396                                                                                                                                                                                                            | 0                                                                                                                                                                              | 0 | 0 | 0  | 0 | 0 | 0  | 0 | 0 | 0  | 0 | 0 | 0 | 0 | 0  | 2 | 0 | 0 | 2 | 0 | 0  | 1 | 0 | 0  | 0 | 0 |   |
|                                                                                                                                                                                                                    | 0                                                                                                                                                                              | 0 | 0 | 0  | 0 | 0 | 0  | 0 | 0 | 0  | 0 | 0 | 0 | 0 | 0  | 0 | 0 | 0 | 0 | 0 | 0  | 0 | 1 | 0  | 0 | 0 |   |
|                                                                                                                                                                                                                    | 0                                                                                                                                                                              | 0 | 0 | 4  | 0 | 0 | 1  | 0 | 0 | 3  | 0 | 0 | 0 | 0 | 0  | 0 | 0 | 0 | 0 | 0 | 0  | 0 | 0 | 0  | 0 | 0 |   |
|                                                                                                                                                                                                                    | 0                                                                                                                                                                              | 0 | 0 | 0  | 0 | 0 | 0  | 1 | 0 | 0  | 0 | 0 | 0 | 0 | 0  | 0 | 0 | 0 | 0 | 0 | 0  | 0 | 0 | 0  | 0 | 0 |   |
| M02255_77_000000000-ADUT3_1_2105_28097_13615                                                                                                                                                                       | G---CC--AG-CA-GCC-----GCG-G-T-----A--A--T--A--CA-G-AGG-GT-----GC-A--A-G--CG-TT-----AA--T---CG-GA-AT-TA-----C-TA-G-G-T-G-----G--T-TT-G-T-T-----                                 |   |   |    |   |   |    |   |   |    |   |   |   |   |    |   |   |   |   |   |    |   |   |    |   |   |   |
| ----AA---G-T-T-G-----A-A-T--G--TG--A-AA-TC--C-C-CG-G-G----CT-C-AA-----C-C-T-G-G-G-A--A-C---T-G--C-A--T-C-----C-AA-A-A--C-----T-G-G--CA--A-G-C---T-A-G-A-G-T-A--T-GG----TA-G-A-----G-G-G-T--AG-T----GG--A-ATT---T-  |                                                                                                                                                                                |   |   |    |   |   |    |   |   |    |   |   |   |   |    |   |   |   |   |   |    |   |   |    |   |   |   |
| C-C-T-GT--GT-A-G-CG-GT--G---A--A-A---TG-C-GT-AG--AT-A-TA--G-G--A-A-G-G-A-AC-A-CC--AG--T-G--GC-GAA-G-G-C-G-----A--C-T-A-C--CTG--G--AC-T-G-----A-T--A-C-T-GA--CA-C-T-G--A-GG--T-G-CG-A--AA-G-C--G-TG--GG-            |                                                                                                                                                                                |   |   |    |   |   |    |   |   |    |   |   |   |   |    |   |   |   |   |   |    |   |   |    |   |   |   |
| G--AG-C-A-AA-----CA--GG                                                                                                                                                                                            | Bacteria(100);Proteobacteria(100);Gammaproteobacteria(100);Pseudomonadales(61);Pseudomonadaceae(61);unclassified(61);unclassified(61);unclassified(61);unclassified(61);       |   |   |    |   |   |    |   |   |    |   |   |   |   |    |   |   |   |   |   |    |   |   |    |   |   |   |
| Otu0397                                                                                                                                                                                                            | 0                                                                                                                                                                              | 0 | 0 | 35 | 0 | 0 | 0  | 0 | 0 | 0  | 0 | 0 | 0 | 0 | 0  | 0 | 0 | 0 | 0 | 0 | 0  | 0 | 0 | 0  | 0 | 0 |   |
|                                                                                                                                                                                                                    | 0                                                                                                                                                                              | 0 | 0 | 0  | 0 | 0 | 0  | 0 | 0 | 0  | 0 | 0 | 0 | 0 | 11 | 0 | 0 | 0 | 0 | 0 | 0  | 0 | 0 | 0  | 0 | 0 |   |
|                                                                                                                                                                                                                    | 0                                                                                                                                                                              | 0 | 0 | 0  | 0 | 0 | 0  | 0 | 0 | 0  | 0 | 0 | 0 | 0 | 0  | 0 | 0 | 0 | 0 | 0 | 0  | 0 | 0 | 0  | 0 | 0 |   |
|                                                                                                                                                                                                                    | 0                                                                                                                                                                              | 0 | 0 | 0  | 0 | 0 | 0  | 0 | 0 | 0  | 0 | 0 | 0 | 0 | 0  | 0 | 0 | 0 | 0 | 0 | 0  | 0 | 0 | 0  | 0 | 0 |   |
| M02255_77_000000000-ADUT3_1_1115_24356_10819                                                                                                                                                                       | T---AC--GT-AG-GGT-----GCA-A-G----C--G--T--T--GT-C-CGG-AA-----TT-A--T-T--GG-GC-----GT-A---AA-GA-GC-TC-----G-TA-G-G-C-G-----G--T-CT-G-T-C-----                                   |   |   |    |   |   |    |   |   |    |   |   |   |   |    |   |   |   |   |   |    |   |   |    |   |   |   |
| ---GC---G-T-C-T-----G-C-T--G--TG--A-AA-AC--T-C-GG-G-G----CT-T-AA-----C-C-C-C-G-G-G--C-C---T-G--C-A--G--T-----G--GG-T-A--C-----G--G-G--CA--G-A-C---T-A-G-A-G-T-G--C-GG----TA-G-G-----G-G-A-G--AC-T----GG--A-ATT---  |                                                                                                                                                                                |   |   |    |   |   |    |   |   |    |   |   |   |   |    |   |   |   |   |   |    |   |   |    |   |   |   |
| C-C-T-GT--GT-A-G-CG-GT--G---A--A-A---TG-C-GC-AG--AT-A-TC--A-G--G-A-G-G-A-AC-A-CC--GG--T-G--GC-GAA-G-G-C-G-----G--G-T-C-T--CTG--G--GC-C-G-----T-A--A-C-T-GA--CG-C-T-G--A-GG--A-G-CG-A--AA-G-C--A-TG--               |                                                                                                                                                                                |   |   |    |   |   |    |   |   |    |   |   |   |   |    |   |   |   |   |   |    |   |   |    |   |   |   |
| GG-T--AG-C-G-AA-----CA--GG                                                                                                                                                                                         | Bacteria(100);Actinobacteria(100);Actinobacteria(100);Actinobacteridae(100);Actinomycetales(100);unclassified(57);unclassified(57);unclassified(57);unclassified(57);          |   |   |    |   |   |    |   |   |    |   |   |   |   |    |   |   |   |   |   |    |   |   |    |   |   |   |
| Otu0398                                                                                                                                                                                                            | 0                                                                                                                                                                              | 0 | 0 | 0  | 0 | 8 | 0  | 0 | 0 | 0  | 0 | 0 | 0 | 0 | 0  | 0 | 0 | 0 | 0 | 0 | 0  | 0 | 0 | 0  | 0 | 0 |   |
|                                                                                                                                                                                                                    | 0                                                                                                                                                                              | 0 | 0 | 0  | 0 | 0 | 12 | 0 | 0 | 13 | 0 | 0 | 0 | 0 | 0  | 0 | 0 | 0 | 0 | 0 | 0  | 0 | 0 | 13 | 0 | 0 |   |
|                                                                                                                                                                                                                    | 0                                                                                                                                                                              | 0 | 0 | 0  | 0 | 0 | 0  | 0 | 0 | 0  | 0 | 0 | 0 | 0 | 0  | 5 | 0 | 0 | 0 | 0 | 0  | 0 | 0 | 0  | 0 | 0 |   |
|                                                                                                                                                                                                                    | 0                                                                                                                                                                              | 0 | 0 | 0  | 0 | 0 | 0  | 0 | 0 | 0  | 0 | 0 | 0 | 0 | 0  | 0 | 0 | 0 | 0 | 0 | 0  | 0 | 0 | 0  | 0 | 0 |   |
| M02255_77_000000000-ADUT3_1_1119_8440_14873                                                                                                                                                                        | T---AC--GT-AG-GGT-----GCA-A-G----C--G--T--T--GT-C-CGG-AA-----TT-A--T-T--GG-GC-----GT-A---AA-GA-GC-TC-----G-TA-G-G-C-G-----G--T-CT-G-T-C-----GC-                                |   |   |    |   |   |    |   |   |    |   |   |   |   |    |   |   |   |   |   |    |   |   |    |   |   |   |



[illegible]



[illegible]



|         |                                                                                                                                                                                                                          |   |   |    |     |    |   |   |   |   |   |   |    |   |   |    |    |   |     |   |   |    |   |   |   |   |     |   |
|---------|--------------------------------------------------------------------------------------------------------------------------------------------------------------------------------------------------------------------------|---|---|----|-----|----|---|---|---|---|---|---|----|---|---|----|----|---|-----|---|---|----|---|---|---|---|-----|---|
| Otu0410 | 0                                                                                                                                                                                                                        | 0 | 0 | 0  | 0   | 0  | 1 | 6 | 0 | 0 | 0 | 0 | 0  | 0 | 0 | 0  | 0  | 0 | 0   | 0 | 0 | 0  | 0 | 0 | 0 | 0 | 2   |   |
|         | 0                                                                                                                                                                                                                        | 2 | 1 | 22 | 0   | 23 | 4 | 8 | 0 | 0 | 3 | 5 | 0  | 9 | 0 | 12 | 0  | 0 | 1   | 3 | 0 | 21 | 0 | 0 | 0 | 0 | 0   |   |
|         | 1                                                                                                                                                                                                                        | 0 | 0 | 0  | 0   | 0  | 0 | 1 | 0 | 0 | 0 | 0 | 0  | 2 | 2 | 0  | 0  | 0 | 0   | 7 | 1 | 2  | 0 | 7 | 0 | 0 | 203 | 0 |
|         | 0                                                                                                                                                                                                                        | 0 | 0 | 0  | 0   | 0  | 0 | 0 | 0 | 0 | 0 | 0 | 0  | 1 | 0 | 0  | 1  | 0 | 0   | 0 | 0 | 0  | 0 | 0 | 0 | 0 |     |   |
|         | M02255_76_000000000-ADUNE_1_1104_6490_20794 TC---GC---AG-AA-TAA-----GCA-C-C-----G-G-C---T--AACT-CTG-TG-----CC-A-G-C-AG-CC-----GC-G---GT-AA-TA-CA-----G-AG-G-G-T-GC-----G--A-GC-G-T-T-----                                |   |   |    |     |    |   |   |   |   |   |   |    |   |   |    |    |   |     |   |   |    |   |   |   |   |     |   |
|         | AA---G-T-C-G-----G-A-T--G--TG--A-AA-TC--C-C-TG-A-G----CT-T-AA-----C-T-T-A-G-G-A-A-T---T-G--C-A--T-T-----C--GA-T-A--C-----T-G-G--GA-A-G-C---T-A-G-A-G-T-A--T-GG---GA-G-A-----G-G-A-T--GG-T-----AG--A--ATT---C-C-A-        |   |   |    |     |    |   |   |   |   |   |   |    |   |   |    |    |   |     |   |   |    |   |   |   |   |     |   |
|         | G-GT--GT-A-G-CG-GT--G---A-A-A---TG-C-GT-AG--AG-A-TC--T-G--G-A-G-G-A-AT-A-CC--GA--T--G--GC-GAA-G--G-C-A-----G--C-C-A-T---CTG--G--CC-T-A-----A-T---A-C-T-GA--CG-C-T-G--A-GG--T-A-CG-A--AA-G-C---A-TG--GG-G--               |   |   |    |     |    |   |   |   |   |   |   |    |   |   |    |    |   |     |   |   |    |   |   |   |   |     |   |
|         | AG-C-A-AA-----CA--GG                                                                                                                                                                                                     |   |   |    |     |    |   |   |   |   |   |   |    |   |   |    |    |   |     |   |   |    |   |   |   |   |     |   |
|         | Bacteria(100);Proteobacteria(100);Gammaproteobacteria(100);Pseudomonadales(100);Moraxellaceae(100);Acinetobacter(100);unclassified(100);unclassified(100);unclassified(100);                                             |   |   |    |     |    |   |   |   |   |   |   |    |   |   |    |    |   |     |   |   |    |   |   |   |   |     |   |
| Otu0411 | 0                                                                                                                                                                                                                        | 0 | 0 | 0  | 0   | 0  | 0 | 0 | 0 | 0 | 0 | 0 | 0  | 0 | 0 | 0  | 0  | 0 | 0   | 0 | 0 | 0  | 0 | 0 | 0 | 0 | 0   |   |
|         | 0                                                                                                                                                                                                                        | 0 | 0 | 0  | 0   | 0  | 0 | 0 | 0 | 0 | 0 | 0 | 0  | 0 | 0 | 0  | 0  | 0 | 0   | 0 | 0 | 0  | 0 | 0 | 0 | 0 | 0   |   |
|         | 0                                                                                                                                                                                                                        | 0 | 0 | 0  | 0   | 0  | 0 | 0 | 0 | 0 | 0 | 0 | 0  | 0 | 0 | 0  | 0  | 0 | 0   | 0 | 0 | 0  | 0 | 0 | 0 | 0 | 0   |   |
|         | 0                                                                                                                                                                                                                        | 0 | 0 | 0  | 221 | 0  | 0 | 0 | 0 | 0 | 0 | 0 | 0  | 0 | 0 | 0  | 0  | 0 | 0   | 0 | 0 | 0  | 0 | 0 | 0 | 0 | 0   |   |
|         | M02255_76_000000000-ADUNE_1_1112_28738_14746                                                                                                                                                                             |   |   |    |     |    |   |   |   |   |   |   |    |   |   |    |    |   |     |   |   |    |   |   |   |   |     |   |
|         | T---AC--GA-AG-GGG-----GCT-A-G-----C-G-T---T--GC-T-CGG-AA-----TG-A--C-T--GG-GC-----GT-A---AA-GG-GC-GC-----G-TA-----GG----C-----                                                                                           |   |   |    |     |    |   |   |   |   |   |   |    |   |   |    |    |   |     |   |   |    |   |   |   |   |     |   |
|         | -----C-----G-G-C-G--TG--A-AA-GC--C-C-TG-G-G----CT-C-AA-----C-C-C-G-G-G--A-C---G-G-C-G--C-T-----G--GA-T-A--C-----G-G-C--GC-G-G-C---T-C-G-A-G-G--G--C-GG---AA-G-A-----G-G-C-T--CG-C-----GG--A--ATT---C-C-C-                |   |   |    |     |    |   |   |   |   |   |   |    |   |   |    |    |   |     |   |   |    |   |   |   |   |     |   |
|         | A-GT--GT-A-G-AG-GT--G---A-A-A---TT-C-GT-AG--AT-A-TT--G-G--G-A-A-G-A-AC-A-CC--GG--T--G--GC-GAA-G--G-C-G-----G--C-G-A-G--CTG--G--TC-C-G-----C-A---C-C-T-GA--CG-C-T-G--A-GG--C-G-CG-A--CA-G-C---G-TG--GG-G--                |   |   |    |     |    |   |   |   |   |   |   |    |   |   |    |    |   |     |   |   |    |   |   |   |   |     |   |
|         | AG-C-A-AA-----CA--GG                                                                                                                                                                                                     |   |   |    |     |    |   |   |   |   |   |   |    |   |   |    |    |   |     |   |   |    |   |   |   |   |     |   |
|         | Bacteria(100);Proteobacteria(100);Alphaproteobacteria(100);Rhodospirillales(100);unclassified(100);unclassified(100);unclassified(100);unclassified(100);unclassified(100);                                              |   |   |    |     |    |   |   |   |   |   |   |    |   |   |    |    |   |     |   |   |    |   |   |   |   |     |   |
| Otu0412 | 0                                                                                                                                                                                                                        | 0 | 0 | 0  | 0   | 0  | 0 | 0 | 0 | 0 | 0 | 0 | 25 | 0 | 0 | 0  | 0  | 0 | 0   | 0 | 0 | 0  | 0 | 0 | 0 | 0 | 0   |   |
|         | 0                                                                                                                                                                                                                        | 0 | 0 | 0  | 0   | 0  | 0 | 0 | 0 | 0 | 0 | 0 | 0  | 0 | 0 | 0  | 0  | 0 | 0   | 0 | 0 | 0  | 0 | 0 | 0 | 0 | 0   |   |
|         | 0                                                                                                                                                                                                                        | 0 | 0 | 0  | 0   | 0  | 0 | 0 | 0 | 0 | 0 | 0 | 0  | 0 | 0 | 0  | 0  | 0 | 0   | 0 | 0 | 0  | 0 | 0 | 0 | 0 | 0   |   |
|         | 0                                                                                                                                                                                                                        | 0 | 0 | 0  | 0   | 0  | 0 | 0 | 0 | 0 | 0 | 0 | 0  | 0 | 0 | 0  | 0  | 0 | 0   | 0 | 0 | 0  | 0 | 0 | 0 | 0 | 0   |   |
|         | M02255_77_000000000-ADUT3_1_2107_27875_13369                                                                                                                                                                             |   |   |    |     |    |   |   |   |   |   |   |    |   |   |    |    |   |     |   |   |    |   |   |   |   |     |   |
|         | T---AC--GT-AG-GGG-----GCA-A-G-----C-G-T---T--AT-C-CGG-AA-----TT-A--C-T--GG-GC-----GT-A---AA-GG-GT-GC-----G-TA-G-G-T-G-----G--C-CT-G-A-T-----                                                                             |   |   |    |     |    |   |   |   |   |   |   |    |   |   |    |    |   |     |   |   |    |   |   |   |   |     |   |
|         | -----AA---G-T-C-A-----G-G-G--G--TC--A-AA-GG--C-A-AC-G-G----CT-C-AA-----C-C-G-T-T-G-T-A-----A-G--C-C--C-C-----T--GA-A-A--C-----T--A-T--CG--G-G-C---T-T-G-A-G-T--T--C-AG---GA-G-A-----G-G-A-A--AG-C-----GG--A--ATT---C--C- |   |   |    |     |    |   |   |   |   |   |   |    |   |   |    |    |   |     |   |   |    |   |   |   |   |     |   |
|         | C-A-A-GT--GT-A-G-CG-GT--G---A-A-A---TG-C-GT-AG--AT-A-TT--T-G--G-A-G-G-A-AC-A-CC--AG--T--G--GC-GAA-G--G-C-G-----G--C-T-T-T--CTG--G--AC-T-G-----A-T---A-C-T-GA--CA-C-T-G--A-GG--C-A-CG-A--AA-G-C---G-TG--GG-G--            |   |   |    |     |    |   |   |   |   |   |   |    |   |   |    |    |   |     |   |   |    |   |   |   |   |     |   |
|         | -AG-C-A-AA-----CA--GG                                                                                                                                                                                                    |   |   |    |     |    |   |   |   |   |   |   |    |   |   |    |    |   |     |   |   |    |   |   |   |   |     |   |
|         | Bacteria(100);unclassified(100);unclassified(100);unclassified(100);unclassified(100);unclassified(100);unclassified(100);unclassified(100);unclassified(100);                                                           |   |   |    |     |    |   |   |   |   |   |   |    |   |   |    |    |   |     |   |   |    |   |   |   |   |     |   |
| Otu0413 | 0                                                                                                                                                                                                                        | 0 | 0 | 0  | 0   | 0  | 0 | 0 | 0 | 0 | 0 | 0 | 2  | 0 | 0 | 0  | 0  | 0 | 0   | 0 | 0 | 1  | 0 | 0 | 0 | 0 | 0   |   |
|         | 0                                                                                                                                                                                                                        | 0 | 0 | 0  | 0   | 0  | 0 | 0 | 0 | 2 | 7 | 0 | 0  | 0 | 0 | 0  | 44 | 0 | 505 | 1 | 0 | 0  | 0 | 0 | 0 | 0 | 0   |   |
|         | 0                                                                                                                                                                                                                        | 0 | 0 | 0  | 0   | 0  | 0 | 0 | 4 | 0 | 0 | 0 | 0  | 0 | 0 | 12 | 0  | 0 | 0   | 0 | 0 | 0  | 0 | 0 | 0 | 0 | 0   |   |
|         | 0                                                                                                                                                                                                                        | 0 | 0 | 0  | 0   |    |   |   |   |   |   |   |    |   |   |    |    |   |     |   |   |    |   |   |   |   |     |   |



|                                              |                                                                                                                                                                                                                                                                                                                                                                                                                                                                                                                                                                                          |                                                                                                                                                                                        |   |   |     |   |   |   |    |    |   |   |   |    |    |   |    |   |    |    |    |   |    |    |   |   |   |   |
|----------------------------------------------|------------------------------------------------------------------------------------------------------------------------------------------------------------------------------------------------------------------------------------------------------------------------------------------------------------------------------------------------------------------------------------------------------------------------------------------------------------------------------------------------------------------------------------------------------------------------------------------|----------------------------------------------------------------------------------------------------------------------------------------------------------------------------------------|---|---|-----|---|---|---|----|----|---|---|---|----|----|---|----|---|----|----|----|---|----|----|---|---|---|---|
| Otu0415                                      | 56                                                                                                                                                                                                                                                                                                                                                                                                                                                                                                                                                                                       | 0                                                                                                                                                                                      | 0 | 0 | 0   | 0 | 0 | 0 | 0  | 0  | 0 | 0 | 0 | 0  | 2  | 0 | 0  | 0 | 0  | 5  | 13 | 0 | 0  | 0  | 5 | 0 | 4 | 0 |
|                                              | 0                                                                                                                                                                                                                                                                                                                                                                                                                                                                                                                                                                                        | 3                                                                                                                                                                                      | 0 | 0 | 0   | 0 | 0 | 0 | 38 | 5  | 0 | 0 | 0 | 58 | 0  | 0 | 27 | 0 | 91 | 60 | 0  | 0 | 93 | 0  | 0 | 0 | 1 | 0 |
|                                              | 0                                                                                                                                                                                                                                                                                                                                                                                                                                                                                                                                                                                        | 0                                                                                                                                                                                      | 0 | 0 | 0   | 0 | 0 | 0 | 0  | 0  | 0 | 0 | 0 | 0  | 0  | 0 | 0  | 0 | 0  | 0  | 0  | 0 | 0  | 0  | 0 | 0 | 0 |   |
|                                              | 0                                                                                                                                                                                                                                                                                                                                                                                                                                                                                                                                                                                        | 51                                                                                                                                                                                     | 0 | 0 | 0   | 0 | 0 | 0 | 0  | 0  | 1 | 0 | 0 | 0  | 0  | 0 | 0  | 0 | 0  | 0  | 0  | 0 | 3  | 44 | 0 | 0 |   |   |
| M02255_77_000000000-ADUT3_1_1103_18099_13233 | T---AC--GT-AG-GGT-----CCG-A-G-----C-G-T--T--GT-C-CGG-AA-----TT-A--T-T-GG-GC-----GT-A----AA-GG-GC-TC-----G-TA-G-G-C-G-----G--T-CT-G-T-C-----GC---G-T-C-G-----G-G-A--G--TG--A-AA-AC--C-A-GG-T-G----CT-T-AA-----C-A-C-C-T-G-G--C-C---T-G--C-T--T--T-----C-GA-T-A--C-----G--G-G--CA-G-A-C---T-A-G-A-G-G-T--A-CT----CA-G-G-----G-G-A-G--AA-T-----GG--A-ATT---C-C-T-G-GT--GT-A-G-CG-GT--G---A-A-A---TG-C-GC-AG--AT-A-TC--A-G--G-A-G-G-A-AC-A-CC---GG--T--G--GC-GAA-G--G-C-G-----G-T-T-C-T--CTG--G--GA-G-T-----A-T--C-C-T-GA--CG-C-T-G--A-GG--A-G-CG-A-AA-G-T--G-TG--GG-G--AG-C-G-AA-----CA--GG | Bacteria(100);Actinobacteria(100);Actinobacteria(100);Actinobacteridae(100);Actinomycetales(100);Propionibacterineae(100);Nocardiodaceae(100);Nocardioides(100);unclassified(100);     |   |   |     |   |   |   |    |    |   |   |   |    |    |   |    |   |    |    |    |   |    |    |   |   |   |   |
| Otu0416                                      | 80                                                                                                                                                                                                                                                                                                                                                                                                                                                                                                                                                                                       | 0                                                                                                                                                                                      | 0 | 0 | 0   | 0 | 0 | 0 | 0  | 0  | 0 | 0 | 0 | 0  | 0  | 0 | 0  | 0 | 0  | 0  | 0  | 0 | 0  | 0  | 0 | 0 | 0 |   |
|                                              | 0                                                                                                                                                                                                                                                                                                                                                                                                                                                                                                                                                                                        | 0                                                                                                                                                                                      | 0 | 0 | 0   | 0 | 0 | 0 | 0  | 15 | 0 | 0 | 0 | 0  | 0  | 0 | 0  | 0 | 0  | 0  | 0  | 0 | 0  | 0  | 0 | 0 | 0 |   |
|                                              | 0                                                                                                                                                                                                                                                                                                                                                                                                                                                                                                                                                                                        | 0                                                                                                                                                                                      | 0 | 0 | 0   | 0 | 0 | 0 | 0  | 0  | 0 | 0 | 0 | 0  | 0  | 0 | 0  | 0 | 0  | 0  | 0  | 0 | 0  | 0  | 0 | 0 | 0 |   |
|                                              | 0                                                                                                                                                                                                                                                                                                                                                                                                                                                                                                                                                                                        | 0                                                                                                                                                                                      | 0 | 0 | 291 | 0 | 0 | 0 | 0  | 0  | 0 | 0 | 0 | 0  | 13 | 0 | 0  | 0 | 0  | 0  | 0  | 0 | 0  | 0  | 0 | 0 | 0 |   |
| M02255_76_000000000-ADUNE_1_1113_18163_19262 | C---GG--CT-AA-CTC-----CGT-G-C-----C-A-G--C--AG-C-CGC-GG-----TA-A--T-A-CG-GA-----GG--A----TC-CA-AG-CG-----T-TA-T-C-C-G-----GA-T-TT-A-T-T-----AA---G-T-C-A-----G-G-G--G--TG--A-AA-GA--C-G-GT-G-G-----CT-C-AA-----C-C-A-T-C-G-C-A-G---T-G--C-C--T-T-----T-GA-T-A--C-----T--G-A-TG--A-G-C---T-T-G-A-A-T-A--C-AC---TT-G-A-----G-G-T-A--GG-C---GG--A-ATG---T-G-A-C-AA--GT-A-G-CG-GT--G---A-A-A---TG-C-AT-AG--AT-A-TG--T-C-A-C-A-G-A-AC-A-CC--AA--T--T--GC-GAA-G--G-C-A-----G-C-T-T-A--CTA--A--GG-T-G-----C-A--A-T-T-GA--CG-C-T-G--A-GG--C-A-CG-A-AA-G-C--G-TG--GG-G--AT-C-A-AA-----CA--GG      | Bacteria(100);Bacteroidetes(100);Sphingobacteria(100);Sphingobacteriales(100);Sphingobacteriaceae(100);Sphingobacteriaceae(100);unclassified(100);unclassified(100);unclassified(100); |   |   |     |   |   |   |    |    |   |   |   |    |    |   |    |   |    |    |    |   |    |    |   |   |   |   |
| Otu0417                                      | 0                                                                                                                                                                                                                                                                                                                                                                                                                                                                                                                                                                                        | 0                                                                                                                                                                                      | 0 | 4 | 0   | 0 | 0 | 0 | 0  | 0  | 0 | 0 | 0 | 0  | 0  | 0 | 0  | 0 | 0  | 0  | 1  | 0 | 0  | 0  | 0 | 1 | 1 | 6 |
|                                              | 0                                                                                                                                                                                                                                                                                                                                                                                                                                                                                                                                                                                        | 0                                                                                                                                                                                      | 0 | 0 | 0   | 0 | 0 | 0 | 0  | 2  | 0 | 1 | 0 | 2  | 0  | 0 | 0  | 0 | 0  | 0  | 0  | 0 | 0  | 0  | 0 | 0 | 0 |   |
|                                              | 0                                                                                                                                                                                                                                                                                                                                                                                                                                                                                                                                                                                        | 0                                                                                                                                                                                      | 0 | 0 | 0   | 0 | 0 | 0 | 0  | 1  | 0 | 2 | 0 | 1  | 0  | 0 | 1  | 2 | 0  | 0  | 0  | 0 | 0  | 0  | 0 | 0 | 5 |   |
|                                              | 0                                                                                                                                                                                                                                                                                                                                                                                                                                                                                                                                                                                        | 7                                                                                                                                                                                      | 0 | 8 | 10  | 0 | 2 | 0 | 5  | 0  | 0 | 0 | 1 | 0  | 0  | 0 | 0  | 0 | 4  | 16 | 0  | 3 | 0  | 0  | 0 | 8 |   |   |
| M02255_77_000000000-ADUT3_1_2103_19733_17383 | ....AC---T-A-CGT-----GCC-A-G-----C-A-G--C--CG-C-GGT-AA-----TA-C--G-T--AG-GG-----TG--C---GA-GCGTT-AA-----T-CG-G-A-C-G-----G--T-TA-C-T-T-----AA---G-C-A-G-----G-A-T--G--TG--A-AA-TC--C-C-CG-G-G-----CT-C-AA-----C-C-T-G-G-G-A-A-C---T-G--C-G--T-T-----C-TG-A-A--C-----T--G-G--GT--G-A-C---T-A-G-A-G-T-G--T-GT---CA-G-A-----G-G-G-A--GG-T-----AG--A-ATT---C-C-A-C-GT--GT-A-G-CA-GT--G---A-A-A---TG-C-GT-AG--AG-A-TG--T-G--G-A-G-G-A-AT-A-CC--GA--T--G--GC-GAA-G--G-C-A-----G--C-C-T-C--CTG--G--GA-T-A-----A-C--A-C-T--GA--CG-T-T-C--A-TG--C-T-CG-A-AA-G-C--G-TG--GG-T--AG-C-A-AA-----CA--GG | Bacteria(100);Proteobacteria(100);Betaproteobacteria(100);Neisseriales(100);Neisseriaceae(100);Neisseria(87);unclassified(87);unclassified(87);unclassified(87);                       |   |   |     |   |   |   |    |    |   |   |   |    |    |   |    |   |    |    |    |   |    |    |   |   |   |   |
| Otu0418                                      | 0                                                                                                                                                                                                                                                                                                                                                                                                                                                                                                                                                                                        | 0                                                                                                                                                                                      | 0 | 0 | 0   | 0 | 0 | 0 | 0  | 0  | 0 | 0 | 0 | 0  | 0  | 0 | 0  | 0 | 0  | 11 | 0  | 0 | 0  | 0  | 0 | 0 | 0 |   |
|                                              | 0                                                                                                                                                                                                                                                                                                                                                                                                                                                                                                                                                                                        | 0                                                                                                                                                                                      | 0 | 0 | 0   | 0 | 0 | 0 | 0  | 0  | 0 | 0 | 0 | 0  | 11 | 0 | 0  | 0 | 0  | 0  | 0  | 0 | 0  | 0  | 0 | 0 | 0 |   |
|                                              | 29                                                                                                                                                                                                                                                                                                                                                                                                                                                                                                                                                                                       | 0                                                                                                                                                                                      | 0 | 0 | 0   | 0 | 0 | 0 | 0  | 1  | 9 | 0 | 0 | 0  | 0  | 0 | 0  | 0 | 70 | 0  | 0  | 0 | 0  | 0  | 0 | 0 | 0 |   |
|                                              | 0                                                                                                                                                                                                                                                                                                                                                                                                                                                                                                                                                                                        | 0                                                                                                                                                                                      | 0 | 0 | 0   | 0 | 0 | 0 | 88 | 0  | 0 | 0 | 0 | 0  | 0  | 0 | 0  | 0 | 0  | 0  | 0  | 0 | 0  | 0  | 0 | 0 | 0 |   |
| M02255_77_000000000-ADUT3_1_1111_15162_5982  | T---AC--GT-AT-GGG-----GCA                                                                                                                                                                                                                                                                                                                                                                                                                                                                                                                                                                |                                                                                                                                                                                        |   |   |     |   |   |   |    |    |   |   |   |    |    |   |    |   |    |    |    |   |    |    |   |   |   |   |



|         |                                                                                                                                                                                                                 |    |    |   |   |   |    |   |    |   |    |   |   |   |   |    |   |   |   |   |    |   |    |   |   |    |   |  |
|---------|-----------------------------------------------------------------------------------------------------------------------------------------------------------------------------------------------------------------|----|----|---|---|---|----|---|----|---|----|---|---|---|---|----|---|---|---|---|----|---|----|---|---|----|---|--|
| Otu0420 | 0                                                                                                                                                                                                               | 0  | 0  | 0 | 0 | 0 | 0  | 0 | 0  | 0 | 0  | 0 | 3 | 0 | 0 | 0  | 0 | 5 | 0 | 0 | 0  | 4 | 0  | 0 | 0 | 1  | 0 |  |
|         | 0                                                                                                                                                                                                               | 0  | 0  | 0 | 0 | 0 | 0  | 0 | 0  | 0 | 0  | 0 | 0 | 0 | 0 | 0  | 0 | 0 | 0 | 0 | 0  | 0 | 0  | 0 | 0 | 0  |   |  |
|         | 2                                                                                                                                                                                                               | 0  | 0  | 0 | 0 | 0 | 0  | 0 | 0  | 0 | 6  | 0 | 0 | 0 | 0 | 0  | 0 | 0 | 0 | 0 | 0  | 0 | 0  | 0 | 0 | 0  |   |  |
|         | 0                                                                                                                                                                                                               | 0  | 0  | 0 | 0 | 0 | 0  | 0 | 0  | 4 | 0  | 0 | 0 | 0 | 0 | 0  | 0 | 0 | 0 | 0 | 0  | 0 | 0  | 0 | 0 | 0  |   |  |
|         | M02255_77_000000000-ADUT3_1_2114_17186_22552 C---A---GC-A-GCC-----GCG-G-T---A-A-T---A-CG-G-AGG-AT-----CC-A-A-G-CG-TT-----AT-C---CG-GA-AT-CA-----G-TA-G-G-C-G-----G-T-CA-G-A-T-----                              |    |    |   |   |   |    |   |    |   |    |   |   |   |   |    |   |   |   |   |    |   |    |   |   |    |   |  |
|         | ---AA---G-T-C-A-----G-T-G--G-TG--A-AA-GC--C-C-AT-C-G---CT-C-AA-----C-G-G-T-G-G-A--A-C---G-G--C-C--A-T-----T-GA-T-A--C-----T-G-T-CT-G-A-C---T-T-G-A-A-T--T--A-TT---AG-G-A-----A-G-T-A--AC-T-----AG--A-ATA---T-G- |    |    |   |   |   |    |   |    |   |    |   |   |   |   |    |   |   |   |   |    |   |    |   |   |    |   |  |
|         | T-A-GT--GT-A-G-CG-GT--G---A-A-A---TG-C-TT-AG--AG-A-TT--A-C--A-T-G-G-A-AT-A-CC---AA-T-T-GC-GAA-G-G-C-A-----G-G-T-T-A---CTA-C--TA-A-T-----A-T---A-T-T-GA-CG-C-T-G--A-TG--G-A-CG-A-AA-G-C---G-TG--GG-T--           |    |    |   |   |   |    |   |    |   |    |   |   |   |   |    |   |   |   |   |    |   |    |   |   |    |   |  |
|         | AG-C-G-AA-----CA--GG Bacteria(100);Bacteroidetes(100);Flavobacteria(100);Flavobacteriales(100);Flavobacteriaceae(100);Flavobacterium(100);unclassified(100);unclassified(100);unclassified(100);                |    |    |   |   |   |    |   |    |   |    |   |   |   |   |    |   |   |   |   |    |   |    |   |   |    |   |  |
| Otu0421 | 0                                                                                                                                                                                                               | 0  | 0  | 0 | 0 | 0 | 0  | 0 | 0  | 0 | 0  | 0 | 0 | 0 | 0 | 0  | 0 | 0 | 0 | 0 | 0  | 0 | 0  | 0 | 0 | 0  |   |  |
|         | 0                                                                                                                                                                                                               | 0  | 0  | 0 | 0 | 0 | 0  | 0 | 0  | 0 | 0  | 0 | 0 | 0 | 0 | 0  | 0 | 0 | 0 | 0 | 0  | 0 | 13 | 0 | 0 | 0  |   |  |
|         | 0                                                                                                                                                                                                               | 0  | 0  | 0 | 0 | 0 | 0  | 0 | 0  | 0 | 0  | 0 | 0 | 0 | 0 | 16 | 0 | 0 | 0 | 0 | 0  | 0 | 0  | 0 | 0 | 86 |   |  |
|         | 0                                                                                                                                                                                                               | 0  | 0  | 0 | 0 | 0 | 0  | 0 | 0  | 0 | 0  | 0 | 0 | 0 | 0 | 0  | 0 | 0 | 0 | 0 | 0  | 0 | 0  | 0 | 0 | 0  |   |  |
|         | M02255_77_000000000-ADUT3_1_1113_12906_7535 T---AC--GG-AG-GGG-----ACT-A-G-----C-G-T---T-GT-T-CGG-AA-----TT-A--C-T--GG-GC-----GT-A---AA-GC-GC-AC-----G-TA-G-G-C-G-----G--A-TC-G-G-A-----                         |    |    |   |   |   |    |   |    |   |    |   |   |   |   |    |   |   |   |   |    |   |    |   |   |    |   |  |
|         | CA---G-T-C-A-----G-A-G--G-TG--A-AA-TC--C-C-GG-G-G---CT-C-AA-----C-C-C-C-G-G-A--A-C---T-G--C-C--T-T-----T-GA-A-A--C-----T-C-C-CG-G-T-C---T-T-G-A-G-T--T--C-GA---GA-G-A-----G-G-T-G--AG-T-----GG--A-ATT---C-C-G-  |    |    |   |   |   |    |   |    |   |    |   |   |   |   |    |   |   |   |   |    |   |    |   |   |    |   |  |
|         | A-GT--GT-A-G-AG-GT--G---A-A-A---TT-C-GT-AG--AT-A-TT--C-G--G-A-G-G-A-AC-A-CC---AG--T-G-GC-GAA-G-G-C-G-----G-C-T-C-A---CTG-G--CT-C-G-----A-T---A-C-T-GA-CG-C-T-G--A-GG--T-G-CG-A-AA-G-C---G-TG--GG-G--            |    |    |   |   |   |    |   |    |   |    |   |   |   |   |    |   |   |   |   |    |   |    |   |   |    |   |  |
|         | AG-C-A-AA-----CA--GG Bacteria(100);Proteobacteria(100);Alphaproteobacteria(100);Rhodobacterales(100);Rhodobacteraceae(100);unclassified(100);unclassified(100);unclassified(100);unclassified(100);             |    |    |   |   |   |    |   |    |   |    |   |   |   |   |    |   |   |   |   |    |   |    |   |   |    |   |  |
| Otu0422 | 0                                                                                                                                                                                                               | 0  | 0  | 0 | 0 | 0 | 0  | 0 | 0  | 0 | 0  | 0 | 2 | 1 | 0 | 0  | 2 | 0 | 0 | 0 | 0  | 6 | 0  | 0 | 0 | 0  |   |  |
|         | 0                                                                                                                                                                                                               | 0  | 0  | 0 | 0 | 0 | 0  | 0 | 0  | 0 | 0  | 0 | 0 | 0 | 0 | 0  | 0 | 0 | 0 | 0 | 0  | 0 | 0  | 0 | 0 | 0  |   |  |
|         | 0                                                                                                                                                                                                               | 0  | 0  | 0 | 9 | 0 | 0  | 0 | 0  | 0 | 4  | 9 | 1 | 0 | 0 | 0  | 0 | 0 | 0 | 0 | 0  | 0 | 0  | 0 | 0 | 0  |   |  |
|         | 0                                                                                                                                                                                                               | 0  | 0  | 0 | 0 | 0 | 0  | 0 | 0  | 0 | 0  | 0 | 0 | 1 | 0 | 0  | 0 | 0 | 0 | 0 | 0  | 0 | 0  | 0 | 0 | 0  |   |  |
|         | M02255_77_000000000-ADUT3_1_2113_12656_16234 G---TG--CC-AG-CAG-----CCG-C-G-----G-T---A--AT-A-CGGAGGA---TC-C--A-A-GC-GT-----TA-T---CC-GG-AA-TC-----A-TT-G-G-C-G-----G--T-CA-G-A-T-----                           |    |    |   |   |   |    |   |    |   |    |   |   |   |   |    |   |   |   |   |    |   |    |   |   |    |   |  |
|         | -----AA---G-T-C-A-----G-T-G--G-TG--A-AA-GC--C-C-AT-C-G---CT-C-AA-----C-G-G-T-G-G-A--A-C---G-G--C-C--A-T-----T-GA-T-A--C-----T-G-T-CT-G-A-C---T-T-G-A-A-T--T--A-TT---AG-G-A-----A-G-T-A--AC-T-----AG--A-ATA---T- |    |    |   |   |   |    |   |    |   |    |   |   |   |   |    |   |   |   |   |    |   |    |   |   |    |   |  |
|         | G-T-A-GT--GT-A-G-CG-GT--G---A-A-A---TG-C-TT-AG--AG-A-TT--A-C--A-T-G-G-A-AT-A-CC---AA-T-T-GC-GAA-G-G-C-A-----G-G-T-T-A---CTA-C--TA-A-T-----A-T---A-T-T-GA-CG-C-T-G--A-TG--G-A-CG-A-AA-G-C---G-TG--GG-T--         |    |    |   |   |   |    |   |    |   |    |   |   |   |   |    |   |   |   |   |    |   |    |   |   |    |   |  |
|         | AG-C-G-AA-----CA--GG Bacteria(100);Bacteroidetes(100);Flavobacteria(100);Flavobacteriales(100);Flavobacteriaceae(100);Flavobacterium(100);unclassified(100);unclassified(100);unclassified(100);                |    |    |   |   |   |    |   |    |   |    |   |   |   |   |    |   |   |   |   |    |   |    |   |   |    |   |  |
| Otu0423 | 8                                                                                                                                                                                                               | 32 | 16 | 0 | 0 | 0 | 10 | 1 | 17 | 0 | 0  | 0 | 0 | 0 | 0 | 0  | 0 | 0 | 0 | 0 | 0  | 0 | 0  | 0 | 0 | 0  |   |  |
|         | 0                                                                                                                                                                                                               | 0  | 0  | 0 | 0 | 0 | 0  | 0 | 0  | 0 | 13 | 0 | 0 | 0 | 0 | 0  | 0 | 0 | 0 | 0 | 0  | 0 | 0  | 0 | 0 | 0  |   |  |
|         | 0                                                                                                                                                                                                               | 0  | 0  | 0 | 0 | 0 | 0  | 0 | 0  | 0 | 0  | 0 | 0 | 0 | 0 | 0  | 0 | 0 | 0 | 0 | 0  | 0 | 0  | 0 | 0 | 0  |   |  |
|         | 0                                                                                                                                                                                                               | 0  | 0  | 0 | 0 | 0 | 0  | 0 | 0  | 0 | 0  | 0 | 0 | 0 | 0 | 0  | 0 | 0 | 0 | 0 | 10 | 1 | 11 | 0 | 0 | 0  |   |  |
|         | M02255_77_000000000-ADUT3                                                                                                                                                                                       |    |    |   |   |   |    |   |    |   |    |   |   |   |   |    |   |   |   |   |    |   |    |   |   |    |   |  |



|                                                                                                                                                                                                                                                                                                                                                                                                                                                                                                                                                                                                                                                         |     |    |    |    |    |   |    |   |    |   |   |   |   |   |    |    |    |    |    |    |   |   |   |   |    |    |   |   |
|---------------------------------------------------------------------------------------------------------------------------------------------------------------------------------------------------------------------------------------------------------------------------------------------------------------------------------------------------------------------------------------------------------------------------------------------------------------------------------------------------------------------------------------------------------------------------------------------------------------------------------------------------------|-----|----|----|----|----|---|----|---|----|---|---|---|---|---|----|----|----|----|----|----|---|---|---|---|----|----|---|---|
| Otu0425                                                                                                                                                                                                                                                                                                                                                                                                                                                                                                                                                                                                                                                 | 0   | 0  | 4  | 0  | 0  | 0 | 0  | 0 | 0  | 0 | 0 | 0 | 0 | 0 | 0  | 0  | 0  | 0  | 0  | 0  | 0 | 0 | 0 | 0 | 0  | 0  | 0 |   |
|                                                                                                                                                                                                                                                                                                                                                                                                                                                                                                                                                                                                                                                         | 0   | 23 | 0  | 0  | 5  | 0 | 0  | 0 | 0  | 0 | 0 | 0 | 0 | 0 | 0  | 0  | 0  | 0  | 0  | 50 | 0 | 0 | 0 | 0 | 0  | 0  | 0 |   |
|                                                                                                                                                                                                                                                                                                                                                                                                                                                                                                                                                                                                                                                         | 0   | 0  | 0  | 0  | 0  | 0 | 0  | 0 | 1  | 0 | 0 | 0 | 0 | 0 | 18 | 5  | 0  | 0  | 9  | 0  | 0 | 0 | 0 | 0 | 0  | 0  | 0 |   |
|                                                                                                                                                                                                                                                                                                                                                                                                                                                                                                                                                                                                                                                         | 10  | 0  | 0  | 0  | 0  | 0 | 0  | 0 | 0  | 0 | 0 | 0 | 0 | 0 | 2  | 0  | 0  | 0  | 0  | 0  | 0 | 0 | 0 | 0 | 0  | 0  |   |   |
| M02255_76_000000000-ADUNE_1_1111_12884_7143 T---AC---GT-AG-GGG-----GCG-A-G-----C--G--T---T-AT-C-CGG-AT-----TC-A--T-T--GG-GC-----GT-----AA-----A--G-C-G-----G--C-CT-G-T-T-----AG---G-T-C-G-----G-G-A--G--TT--A-AA-GC--C-G-GG-G-G----CT-C-AA-----C-C-C-C-C-G-T--C-----C-G--C-T--C-C-----C--GA-T-A--C-----C-G-G--CG--G-G-C---T-T-G-A-G-T--C---T-GG---TA-G-G-----G-G-A-A--GG-C-----GG--A--ATT---C-C-C-A-GT--GT-A-G-CG-GT--G---G--A-A---TG-C-GC-AG--AT-A-TT--G-G--G-A-A-G-A-AC-A-CC---GG--T--G--GC-GAA-G--G-C-G-----G--C-C-T-T--CTG--G--GC-C-A-----C-G---A-C-T-GA--CG-C-T-G--A-GG--C-G-CG-A--AA-G-C---T-AG--GG-G--AG-C-G-AA-----CA--GG                       |     |    |    |    |    |   |    |   |    |   |   |   |   |   |    |    |    |    |    |    |   |   |   |   |    |    |   |   |
| Bacteria(100);Actinobacteria(100);Actinobacteria(100);Coriobacteridae(100);Coriobacteriales(100);Coriobacterineae(100);Coriobacteriaceae(100);Olsenella(100);unclassified(100);                                                                                                                                                                                                                                                                                                                                                                                                                                                                         |     |    |    |    |    |   |    |   |    |   |   |   |   |   |    |    |    |    |    |    |   |   |   |   |    |    |   |   |
| Otu0426                                                                                                                                                                                                                                                                                                                                                                                                                                                                                                                                                                                                                                                 | 0   | 0  | 0  | 82 | 0  | 0 | 0  | 0 | 0  | 0 | 0 | 0 | 5 | 0 | 0  | 0  | 0  | 0  | 0  | 0  | 0 | 0 | 0 | 0 | 5  | 0  | 0 | 0 |
|                                                                                                                                                                                                                                                                                                                                                                                                                                                                                                                                                                                                                                                         | 0   | 0  | 0  | 0  | 0  | 0 | 0  | 0 | 0  | 0 | 0 | 0 | 0 | 0 | 0  | 0  | 0  | 0  | 0  | 0  | 0 | 0 | 0 | 0 | 71 | 0  | 0 | 0 |
|                                                                                                                                                                                                                                                                                                                                                                                                                                                                                                                                                                                                                                                         | 0   | 0  | 0  | 0  | 0  | 0 | 0  | 0 | 0  | 0 | 4 | 0 | 0 | 0 | 23 | 0  | 0  | 0  | 0  | 0  | 0 | 0 | 0 | 0 | 0  | 0  | 0 | 0 |
|                                                                                                                                                                                                                                                                                                                                                                                                                                                                                                                                                                                                                                                         | 0   | 0  | 0  | 0  | 6  | 0 | 0  | 0 | 0  | 0 | 0 | 0 | 0 | 0 | 0  | 0  | 0  | 0  | 0  | 0  | 0 | 0 | 0 | 0 | 0  | 0  | 0 |   |
| M02255_77_000000000-ADUT3_1_1102_9695_19904 T---AC---GG-AG-GGT-----GCA-A-G-----C--G--T---T-AT-C-CGG-AA-----TC-A--C-T--GG-GC-----GT--A-----AA-GG-GC-GC-----G-TA-G-G-C-G-----G--T-TT-G-T-T-----AA---G-T-C-C-----G-A-T--G--TT--A-AA-GA--C-C-GA-G-G----CT-C-AA-----C-C-T-C-G-A-C--A-C---G-G--C-G---T-T-----G--GA-T-A--C-----T--G-G--CA--A-G-C---T-G-G-A-C-G-G---T-TG---GA-G-A-----G-G-A-A--GG-T-----AG--A--ATT---A-C-C-A-GT--GT-A-G-CG-GT--G---G--A-A---TG-C-GT-AG--AT-A-CT--G-G--T-A-G-G-A-AT-A-CC---CA--T--T--GC-GAA-G--G-C-A-----G--C-C-T-T--CTG--G--AC-A-A-----C-A--C-G-T-GA--CG-C-T-G--A-GG--C-G-CG-A--AA-G-T--G-TG--GG-G--AG-C-A-AA-----CC--GG        |     |    |    |    |    |   |    |   |    |   |   |   |   |   |    |    |    |    |    |    |   |   |   |   |    |    |   |   |
| Bacteria(100);Deinococcus-Thermus(100);Deinococcales(100);Trueperaceae(100);Truepera(100);unclassified(100);unclassified(100);unclassified(100);unclassified(100);                                                                                                                                                                                                                                                                                                                                                                                                                                                                                      |     |    |    |    |    |   |    |   |    |   |   |   |   |   |    |    |    |    |    |    |   |   |   |   |    |    |   |   |
| Otu0427                                                                                                                                                                                                                                                                                                                                                                                                                                                                                                                                                                                                                                                 | 0   | 0  | 0  | 0  | 0  | 0 | 0  | 0 | 0  | 0 | 0 | 0 | 0 | 0 | 0  | 0  | 0  | 0  | 0  | 0  | 3 | 0 | 0 | 0 | 0  | 0  | 0 | 0 |
|                                                                                                                                                                                                                                                                                                                                                                                                                                                                                                                                                                                                                                                         | 0   | 1  | 0  | 0  | 0  | 0 | 19 | 0 | 20 | 0 | 0 | 0 | 0 | 0 | 0  | 0  | 0  | 0  | 0  | 0  | 0 | 0 | 0 | 0 | 0  | 0  | 0 | 0 |
|                                                                                                                                                                                                                                                                                                                                                                                                                                                                                                                                                                                                                                                         | 0   | 0  | 0  | 0  | 0  | 0 | 0  | 0 | 0  | 0 | 0 | 0 | 0 | 0 | 0  | 0  | 0  | 0  | 0  | 0  | 0 | 0 | 0 | 0 | 0  | 0  | 0 | 0 |
|                                                                                                                                                                                                                                                                                                                                                                                                                                                                                                                                                                                                                                                         | 0   | 0  | 0  | 0  | 0  | 0 | 0  | 0 | 0  | 0 | 0 | 0 | 0 | 0 | 10 | 0  | 0  | 0  | 0  | 0  | 0 | 0 | 0 | 0 | 0  | 0  | 0 |   |
| M02255_77_000000000-ADUT3_1_1118_8844_18387 T---AC---GT-AG-GGG-----CCT-A-G-----C--G--T---T-GT-C-CGG-AT-----TT-A--T-T--GG-GC-----GT--A-----AA-GA-GC-TC-----G-TA-G-G-C-G-----G--T-TC-G-G-T-----AA---G-T-C-A-----G-G-T--G--TG--A-AA-TC--T-C-CA-C-G----CT-C-AA-----C-G-T-G-G-A-G--G-----C-G-CCAC---C--T-----GA-A-A--C-----T--G-C--CG-TG-A-C---T-C-G-A-G-T--C---C-GG---TA-G-G-----G-G--AG---TG-T-----GG--A--ATT---C-C---G-GT--GT-A-G-CG-GT--G---A--A-A---TG-C-GC-AG--AT-A-TC--G-G--G-A-G-G-A-AC-A-CC---AG--T--G--GC-GAA-G--G-C-G-----G--C-A-C-T---CTGG---GC-C-G-----G-T---A-C-T-GA--CG-C-T-G--A-GG--A-G-CG-A--AA-G-C---G-TG--GG-G--AG-C-G-AA-----CA--GG      |     |    |    |    |    |   |    |   |    |   |   |   |   |   |    |    |    |    |    |    |   |   |   |   |    |    |   |   |
| Bacteria(100);Actinobacteria(82);Actinobacteria(82);unclassified(82);unclassified(82);unclassified(82);unclassified(82);unclassified(82);unclassified(82);                                                                                                                                                                                                                                                                                                                                                                                                                                                                                              |     |    |    |    |    |   |    |   |    |   |   |   |   |   |    |    |    |    |    |    |   |   |   |   |    |    |   |   |
| Otu0428                                                                                                                                                                                                                                                                                                                                                                                                                                                                                                                                                                                                                                                 | 0   | 0  | 0  | 0  | 0  | 0 | 0  | 0 | 0  | 0 | 0 | 0 | 0 | 0 | 0  | 0  | 0  | 0  | 0  | 0  | 0 | 0 | 0 | 0 | 0  | 6  | 0 | 0 |
|                                                                                                                                                                                                                                                                                                                                                                                                                                                                                                                                                                                                                                                         | 0   | 0  | 0  | 0  | 0  | 0 | 0  | 0 | 0  | 0 | 0 | 0 | 0 | 0 | 0  | 0  | 0  | 0  | 0  | 0  | 0 | 0 | 0 | 0 | 0  | 0  | 0 | 0 |
|                                                                                                                                                                                                                                                                                                                                                                                                                                                                                                                                                                                                                                                         | 0   | 0  | 0  | 0  | 0  | 0 | 0  | 0 | 0  | 0 | 0 | 0 | 0 | 0 | 0  | 10 | 0  | 0  | 0  | 0  | 0 | 0 | 0 | 0 | 0  | 0  | 0 | 0 |
|                                                                                                                                                                                                                                                                                                                                                                                                                                                                                                                                                                                                                                                         | 0   | 0  | 0  | 0  | 37 | 0 | 0  | 0 | 0  | 0 | 0 | 0 | 0 | 0 | 0  | 0  | 0  | 36 | 0  | 0  | 0 | 0 | 0 | 0 | 0  | 0  | 0 |   |
| M02255_77_000000000-ADUT3_1_2103_20969_23951 C---AC---GT-AG-GGG-----GCA-A-G-----C--G--T---T-GT-C-CGG-AT-----TT-A--T-T--GG-GC-----GT--A-----AA-GA-GC-TC-----G-TA-G-G-C-G-----G--C-TG-A-G-T-----AA---G-T-C-G-----G-A-T--G--TT--A-AA-TC--C-C-CA-G-G----CT-C-AA-----C-C-T-G-G-G-A-----C-A-CC-A--C-C-----C--GA-T-A--C-----T--G-C--TC-TG-G-C---T-A-G-A-G-T--C---C-GG---TA-G-G-----G-G-A-G---CG-T-----GG--A--ATT---C-C-T-G-GT--GT-A-G-CG-GT--G---A--A-A---TG-C-GC-AG--AT-A-TC--A-G--G-A-G-G-A-AC-A-CC---AG--C--G--GC-GAA-G--G-C-G-----G--C-G-C-T---CTG--G--GC-C-G-----G-A--A-C-T--GA--CG-C-T-G--A-GG--A-G-CG-A--AA-G-C---G-TG--GG-T--AG-C-A-AA-----CA--GG      |     |    |    |    |    |   |    |   |    |   |   |   |   |   |    |    |    |    |    |    |   |   |   |   |    |    |   |   |
| Bacteria(100);Actinobacteria(100);Actinobacteria(100);Acidimicrobidae(100);Acidimicrobiales(100);Acidimicrobineae(100);unclassified(100);unclassified(100);unclassified(100);                                                                                                                                                                                                                                                                                                                                                                                                                                                                           |     |    |    |    |    |   |    |   |    |   |   |   |   |   |    |    |    |    |    |    |   |   |   |   |    |    |   |   |
| Otu0429                                                                                                                                                                                                                                                                                                                                                                                                                                                                                                                                                                                                                                                 | 112 | 0  | 0  | 0  | 0  | 0 | 0  | 0 | 0  | 0 | 0 | 0 | 0 | 0 | 0  | 0  | 0  | 0  | 0  | 0  | 0 | 0 | 0 | 0 | 0  | 0  | 0 | 0 |
|                                                                                                                                                                                                                                                                                                                                                                                                                                                                                                                                                                                                                                                         | 0   | 0  | 66 | 0  | 0  | 0 | 0  | 0 | 0  | 0 | 0 | 0 | 0 | 0 | 65 | 19 | 0  | 0  | 0  | 0  | 0 | 0 | 0 | 0 | 0  | 0  | 0 | 0 |
|                                                                                                                                                                                                                                                                                                                                                                                                                                                                                                                                                                                                                                                         | 0   | 0  | 0  | 0  | 0  | 0 | 0  | 0 | 0  | 0 | 0 | 0 | 0 | 0 | 18 | 0  | 23 | 0  | 43 | 0  | 9 | 0 | 0 | 0 | 0  | 56 | 0 |   |
|                                                                                                                                                                                                                                                                                                                                                                                                                                                                                                                                                                                                                                                         | 18  | 0  | 29 | 0  | 0  | 0 | 0  | 0 | 0  | 0 | 0 | 4 | 0 | 0 | 0  | 0  | 21 | 0  | 0  | 0  | 0 | 0 | 0 | 0 | 0  | 0  | 0 |   |
| M02255_77_000000000-ADUT3_1_2113_20776_15051 T---AC---GG-AG-GGG-----GCT-A-G-----C--G--T---T-GT-T-CGG-AA-----TT-A--C-T--GG-GC-----GT--A-----AA-GC-GC-AC-----G-TA-G-G-C-G-----G--A-TC-A-G-T-----CA---G-T-C-A-----G-G-G--G--TG--A-AA-TC--C-C-GG-G-G----CT-C-AA-----C-C-C-C-G-G-A--A-C---T-G--C-C---T-T-----T--GA-T-A--C-----T--G-C--TG--G-T-C---T-G-G-A-G-G--T---C-GA---GA-G-A-----G-G-C-G---AG-T-----GG--A--ATT---C-C-G-A-GT--GT-A-G-AG-GT--G---A--A-A---TT-C-GT-AG--AT-A-TT--C-G--G-A-G-G-A-AC-A-CC---AG--T--G--GC-GAA-G--G-C-G-----G--C-T-C-G---CTG--G--CT-C-G-----A-T---A-C-T--GA--CG-C-T-G--A-GG--T-G-CG-A--AA-G-C---G-TG--GG-G--AG-C-A-AA-----CA--GG |     |    |    |    |    |   |    |   |    |   |   |   |   |   |    |    |    |    |    |    |   |   |   |   |    |    |   |   |
| Bacteria(100);Proteobacteria(100);Alphaproteobacteria(100);unclassified(100);unclassified(100);unclassified(100);unclassified(100);unclassified(100);unclassified(100);                                                                                                                                                                                                                                                                                                                                                                                                                                                                                 |     |    |    |    |    |   |    |   |    |   |   |   |   |   |    |    |    |    |    |    |   |   |   |   |    |    |   |   |



|                                                                                                                                                                                                                                                                                                                                                                                                                                                                                                                                                                                                                                                                                                                                                                                                                                |   |     |   |    |   |   |   |   |    |   |    |   |   |    |   |    |   |    |    |    |    |   |   |   |    |   |   |
|--------------------------------------------------------------------------------------------------------------------------------------------------------------------------------------------------------------------------------------------------------------------------------------------------------------------------------------------------------------------------------------------------------------------------------------------------------------------------------------------------------------------------------------------------------------------------------------------------------------------------------------------------------------------------------------------------------------------------------------------------------------------------------------------------------------------------------|---|-----|---|----|---|---|---|---|----|---|----|---|---|----|---|----|---|----|----|----|----|---|---|---|----|---|---|
| Otu0430                                                                                                                                                                                                                                                                                                                                                                                                                                                                                                                                                                                                                                                                                                                                                                                                                        | 0 | 0   | 0 | 0  | 0 | 0 | 0 | 0 | 91 | 0 | 0  | 0 | 0 | 0  | 0 | 0  | 0 | 0  | 0  | 0  | 0  | 0 | 0 | 0 | 0  | 0 | 0 |
|                                                                                                                                                                                                                                                                                                                                                                                                                                                                                                                                                                                                                                                                                                                                                                                                                                | 0 | 0   | 0 | 0  | 0 | 0 | 0 | 0 | 0  | 0 | 0  | 0 | 0 | 0  | 0 | 30 | 0 | 0  | 0  | 0  | 0  | 0 | 0 | 0 | 0  | 0 | 0 |
|                                                                                                                                                                                                                                                                                                                                                                                                                                                                                                                                                                                                                                                                                                                                                                                                                                | 0 | 0   | 0 | 0  | 0 | 0 | 0 | 0 | 0  | 0 | 0  | 0 | 0 | 0  | 0 | 11 | 0 | 0  | 0  | 0  | 0  | 0 | 0 | 0 | 0  | 0 | 0 |
|                                                                                                                                                                                                                                                                                                                                                                                                                                                                                                                                                                                                                                                                                                                                                                                                                                | 0 | 0   | 0 | 0  | 0 | 0 | 0 | 0 | 0  | 0 | 24 | 0 | 0 | 0  | 0 | 0  | 0 | 0  | 0  | 0  | 0  | 0 | 0 | 0 | 0  | 0 | 0 |
| M02255_77_000000000-ADUT3_1_1103_16943_14427 T---AC---GT-AG-GGG-----GCA-A-G-----C-G-T---T-AT-C-CGG-AT-----TT-A--C-T-GG-GT-----GT-A----AA-GG-GA-GC-----G-TA-G-A-C-G-----G--C-TT-T-G-C-----AA---G-T-C-T-----G-A-C--G-TG--A-AA-CT--C-C-GG-G-G----CT-C-AA-----C-T-C-C-G-G-A--A-C---T-G--C-G---T-T-----G--GA-A-A--C-----T-G-T-AA--G-G-C---T-T-G-A-G-T-G--C-CG----GA-G-A-----G-G-T-A--AG-C-----GG-A--ATT---C-C-T-A-GT--GT-A-G-CG-GT--G---A-A-A--TG-C-GT-AG--AT-A-TT--A-G--G-A-G-G-A-AC-A-CC--AG--T-G--GC-GAA-G-G-C-G-----G--C-T-T-A--CTG--G--AC-G-G-----C-A--A-C-T--GA--CG-T-T-G--A-GG--C-T-CG-A--AA-G-C---G-TG--GG-G--AG-C-A-AA-----CA--GG Bacteria(100);Firmicutes(100);Clostridia(100);Clostridiales(100);Lachnospiraceae(100);unclassified(100);unclassified(100);unclassified(100);unclassified(100);                           |   |     |   |    |   |   |   |   |    |   |    |   |   |    |   |    |   |    |    |    |    |   |   |   |    |   |   |
| Otu0431                                                                                                                                                                                                                                                                                                                                                                                                                                                                                                                                                                                                                                                                                                                                                                                                                        | 0 | 0   | 0 | 0  | 0 | 0 | 5 | 0 | 0  | 0 | 0  | 0 | 0 | 0  | 0 | 0  | 0 | 0  | 0  | 0  | 0  | 0 | 0 | 0 | 0  | 0 | 0 |
|                                                                                                                                                                                                                                                                                                                                                                                                                                                                                                                                                                                                                                                                                                                                                                                                                                | 0 | 1   | 0 | 0  | 0 | 0 | 0 | 0 | 0  | 0 | 0  | 0 | 0 | 0  | 0 | 0  | 0 | 0  | 0  | 0  | 8  | 0 | 0 | 0 | 0  | 0 | 0 |
|                                                                                                                                                                                                                                                                                                                                                                                                                                                                                                                                                                                                                                                                                                                                                                                                                                | 0 | 0   | 0 | 0  | 0 | 0 | 0 | 0 | 0  | 0 | 0  | 0 | 0 | 1  | 0 | 0  | 0 | 0  | 0  | 0  | 0  | 0 | 0 | 0 | 0  | 0 | 3 |
|                                                                                                                                                                                                                                                                                                                                                                                                                                                                                                                                                                                                                                                                                                                                                                                                                                | 1 | 0   | 0 | 0  | 0 | 0 | 0 | 0 | 0  | 0 | 0  | 0 | 3 | 0  | 0 | 0  | 0 | 0  | 0  | 0  | 0  | 0 | 0 | 0 | 27 | 0 | 0 |
| M02255_77_000000000-ADUT3_1_1106_22784_9502 T---AC---GT-AG-GGT-----GCG-A-G-----C-G-T---T--GT-C-CGG-AT-----TT-A--C-T-GG-GC-----GT-A----AA-GG-GC-TC-----G-TA-G-G-T-G-----G--T-GT-G-T-C-----GC---G-T-C-G-----G-C-T--G-TG--T-AA-TC--C-A-GG-G-G----CT-T-AA-----C-T-T-T-T-G-G--T-T---G-G--C-A--G-G-----C--GA-T-A--C-----G--G-G--CAT-T-G-C---T-T-G-A-G-T-G--C-TG----TA-G-G-----G-G-A-G--AC-T-----GG-A--ATT---C-C-T-G-GT--GT-A-G-CG-GT--G---A-A-A--TG-C-GC-AG--AT-A-TC--A-G--G-A-G-G-A-AC-A-CC--GA--T-G--GC-GAA-G-G-C-A-----G-G-T-C-T---CTG--G--GC-A-G-----T-T--A-C-T--GA--CG-C-T-G--A-GG--A-G-CG-A--GA-G-C---A-TG--GG-T--AG-C-G-AA-----CA--GG Bacteria(100);Actinobacteria(100);Actinobacteria(100);Actinobacteridae(100);Actinomycetales(100);Corynebacterineae(100);Corynebacteriaceae(100);Corynebacterium(100);unclassified(100); |   |     |   |    |   |   |   |   |    |   |    |   |   |    |   |    |   |    |    |    |    |   |   |   |    |   |   |
| Otu0432                                                                                                                                                                                                                                                                                                                                                                                                                                                                                                                                                                                                                                                                                                                                                                                                                        | 2 | 0   | 0 | 13 | 0 | 9 | 0 | 5 | 0  | 2 | 0  | 0 | 0 | 0  | 0 | 0  | 0 | 0  | 0  | 0  | 0  | 0 | 0 | 0 | 0  | 0 | 1 |
|                                                                                                                                                                                                                                                                                                                                                                                                                                                                                                                                                                                                                                                                                                                                                                                                                                | 0 | 63  | 0 | 0  | 0 | 0 | 0 | 7 | 0  | 0 | 0  | 0 | 1 | 13 | 0 | 0  | 0 | 0  | 0  | 17 | 0  | 0 | 3 | 0 | 1  | 0 | 0 |
|                                                                                                                                                                                                                                                                                                                                                                                                                                                                                                                                                                                                                                                                                                                                                                                                                                | 0 | 10  | 4 | 0  | 0 | 0 | 0 | 0 | 0  | 1 | 0  | 0 | 0 | 0  | 0 | 0  | 0 | 1  | 0  | 0  | 0  | 0 | 1 | 5 | 0  | 0 | 8 |
|                                                                                                                                                                                                                                                                                                                                                                                                                                                                                                                                                                                                                                                                                                                                                                                                                                | 0 | 2   | 0 | 2  | 1 | 0 | 0 | 0 | 12 | 0 | 0  | 0 | 0 | 0  | 1 | 0  | 0 | 0  | 10 | 0  | 0  | 0 | 1 | 0 | 9  | 0 | 0 |
| M02255_77_000000000-ADUT3_1_1112_26196_19801 C---A---GC-A-GCC-----GCG-G-T-----A--A-T---A--CG-T-AGG-GC-----GC-G--A-G-CG-TT-----GT-C----CG-GA-AT-TA-----T-TG-G-G-C-G-----G--C-TG-G-T-C-----GC---G-T-C-T-----G-T-C--G--TG--A-AA-TC--C-T-CT-G-G----CT-T-AA-----C-T-G-G-G-G-G--C-T---T-G--C-G--G-T-----G--GG-T-A--C-----G--G-G--CC--G-G-C---T-T-G-A-G-T-G--C-GG----TA-G-G-----G-G-A-G--AC-T-----GG-A--ACT---C-C-T-G-GT--GT-A-G-CG-GT--G---G--A-A--TG-C-GC-AG--AT-A-TC--A-G--G-A-A-G-A-AC-A-CC--GG--T-G--GC-GAA-G-G-C-G-----G--G-T-C-T---CTG--G--GC-C-G-----T-T--A-C-T--GA--CG-C-T-G--A-GG--A-G-CG-A--AA-G-C---G-TG--GG-G--AG-C-G-AA-----CA--GG Bacteria(100);Actinobacteria(100);Actinobacteria(100);Actinobacteridae(100);Actinomycetales(100);Actinomycineae(100);Actinomycetaceae(100);Actinomyces(100);unclassified(100);       |   |     |   |    |   |   |   |   |    |   |    |   |   |    |   |    |   |    |    |    |    |   |   |   |    |   |   |
| Otu0433                                                                                                                                                                                                                                                                                                                                                                                                                                                                                                                                                                                                                                                                                                                                                                                                                        | 0 | 146 | 0 | 0  | 0 | 0 | 0 | 0 | 0  | 0 | 0  | 0 | 0 | 0  | 0 | 0  | 0 | 0  | 0  | 0  | 0  | 0 | 0 | 0 | 0  | 0 | 0 |
|                                                                                                                                                                                                                                                                                                                                                                                                                                                                                                                                                                                                                                                                                                                                                                                                                                | 0 | 0   | 0 | 0  | 0 | 0 | 0 | 0 | 0  | 0 | 0  | 0 | 0 | 0  | 0 | 33 | 0 | 0  | 0  | 0  | 0  | 0 | 0 | 0 | 0  | 0 | 0 |
|                                                                                                                                                                                                                                                                                                                                                                                                                                                                                                                                                                                                                                                                                                                                                                                                                                | 0 | 0   | 0 | 0  | 0 | 0 | 0 | 0 | 0  | 0 | 0  | 0 | 0 | 0  | 0 | 0  | 0 | 0  | 0  | 0  | 0  | 0 | 0 | 0 | 0  | 0 | 0 |
|                                                                                                                                                                                                                                                                                                                                                                                                                                                                                                                                                                                                                                                                                                                                                                                                                                | 0 | 0   | 0 | 0  | 0 | 0 | 0 | 0 | 0  | 0 | 0  | 0 | 0 | 0  | 0 | 0  | 0 | 17 | 0  | 0  | 45 | 0 | 0 | 0 | 0  | 0 | 0 |
| M02255_77_000000000-ADUT3_1_1102_12331_20121 T---AC---GT-AG-GTT-----GCA-A-G-----C-G-T---T--GT-C-CGG-AA-----TT-A--                                                                                                                                                                                                                                                                                                                                                                                                                                                                                                                                                                                                                                                                                                              |   |     |   |    |   |   |   |   |    |   |    |   |   |    |   |    |   |    |    |    |    |   |   |   |    |   |   |



|                                                                                                                                                                                                                          |                                                                                                                                                                               |   |     |    |    |   |     |    |   |    |   |   |   |   |    |    |   |    |   |   |   |   |   |   |   |    |
|--------------------------------------------------------------------------------------------------------------------------------------------------------------------------------------------------------------------------|-------------------------------------------------------------------------------------------------------------------------------------------------------------------------------|---|-----|----|----|---|-----|----|---|----|---|---|---|---|----|----|---|----|---|---|---|---|---|---|---|----|
| Otu0435                                                                                                                                                                                                                  | 237                                                                                                                                                                           | 0 | 0   | 0  | 0  | 0 | 0   | 0  | 0 | 0  | 0 | 0 | 0 | 0 | 0  | 0  | 0 | 0  | 0 | 0 | 0 | 0 | 0 | 0 | 0 | 0  |
| 31                                                                                                                                                                                                                       | 0                                                                                                                                                                             | 0 | 0   | 0  | 0  | 0 | 115 | 0  | 0 | 0  | 0 | 0 | 0 | 0 | 0  | 0  | 0 | 0  | 0 | 0 | 0 | 0 | 0 | 0 | 0 | 0  |
| 0                                                                                                                                                                                                                        | 0                                                                                                                                                                             | 0 | 0   | 0  | 0  | 0 | 0   | 0  | 0 | 0  | 0 | 0 | 0 | 0 | 0  | 0  | 0 | 0  | 0 | 0 | 0 | 0 | 0 | 0 | 0 | 58 |
| 0                                                                                                                                                                                                                        | 0                                                                                                                                                                             | 0 | 176 | 0  | 0  | 0 | 0   | 0  | 0 | 0  | 0 | 0 | 0 | 0 | 0  | 0  | 0 | 0  | 0 | 0 | 0 | 0 | 0 | 0 | 0 | 0  |
| M02255_77_000000000-ADUT3_1_1118_25646_21427                                                                                                                                                                             | T---AC---GG-AG-GGG-----GCT-A-G-----C--G-T---T--GT-T-CGG-AA-----TT-A--C-T--GG-GC-----GT--A----AA-GC-GT-AC-----G-TA-G-G-C-G-----G--C-TT-T-G-T-----                              |   |     |    |    |   |     |    |   |    |   |   |   |   |    |    |   |    |   |   |   |   |   |   |   |    |
| -----AA---G-T-T-A-----G-A-G--G-TG--A-AA-GC--C-T-GG-T-G-----CT-C-AA-----C-A-C-C-A-G-A--A-C---T-G--C-C---T-T-----T-AA-G-A--C-----T--G-C--AT--C-G-C---T-T-G-A-A-C--G--T-CG----GA-G-A-----G-G-T-G--AG-T-----GG--A--ATT---C-  |                                                                                                                                                                               |   |     |    |    |   |     |    |   |    |   |   |   |   |    |    |   |    |   |   |   |   |   |   |   |    |
| C-G-A-GT--GT-A-G-AG-GT--G---A--A-A---TT-C-GT-AG--AT-A-TT--C-G--G-A-A-G-A-AC-A-CC--AG--T--G--GC-GAA-G--G-C--G-----G--C-T-C-A---CTG--G--AC-G-A-----C-T--G-T-T--GA--CG-C-T-G--A-GG--T-A-CG-A-AA-G-C---G-TG--GG-             |                                                                                                                                                                               |   |     |    |    |   |     |    |   |    |   |   |   |   |    |    |   |    |   |   |   |   |   |   |   |    |
| G--AG-C-A-AA-----CA--GG                                                                                                                                                                                                  | Bacteria(100);Proteobacteria(100);Alphaproteobacteria(100);Sphingomonadales(100);Sphingomonadaceae(100);Sphingomonas(100);unclassified(95);unclassified(95);unclassified(95); |   |     |    |    |   |     |    |   |    |   |   |   |   |    |    |   |    |   |   |   |   |   |   |   |    |
| Otu0436                                                                                                                                                                                                                  | 211                                                                                                                                                                           | 0 | 0   | 0  | 0  | 0 | 0   | 0  | 0 | 0  | 0 | 0 | 0 | 0 | 0  | 0  | 0 | 0  | 0 | 0 | 0 | 0 | 0 | 0 | 0 | 0  |
| 0                                                                                                                                                                                                                        | 0                                                                                                                                                                             | 0 | 0   | 0  | 0  | 0 | 0   | 0  | 0 | 0  | 0 | 0 | 0 | 0 | 0  | 0  | 0 | 0  | 0 | 0 | 0 | 0 | 0 | 0 | 0 | 0  |
| 0                                                                                                                                                                                                                        | 0                                                                                                                                                                             | 0 | 0   | 0  | 0  | 0 | 0   | 0  | 0 | 0  | 0 | 0 | 0 | 0 | 0  | 0  | 0 | 0  | 0 | 0 | 0 | 0 | 0 | 0 | 0 | 0  |
| 0                                                                                                                                                                                                                        | 0                                                                                                                                                                             | 0 | 0   | 0  | 0  | 0 | 0   | 0  | 0 | 0  | 0 | 3 | 0 | 0 | 0  | 0  | 0 | 0  | 0 | 0 | 0 | 0 | 0 | 0 | 0 | 0  |
| M02255_77_000000000-ADUT3_1_1107_8580_15783                                                                                                                                                                              | T---AC---GT-AG-GGG-----GCA-A-G-----C--G-T---T--AT-C-CGG-AA-----TT-A--T-T--GG-GC-----GT--A----AA-GG-GT-AC-----G-TA-G-G-T-G-----G--T-TA-C-C-C-----AA-                           |   |     |    |    |   |     |    |   |    |   |   |   |   |    |    |   |    |   |   |   |   |   |   |   |    |
| ---G-C-A-C-----G-A-G--G-TA--T-AA-GG--C-A-AT-G-G-----CT-T-AA-----C-C-A-T-T-G-T--T---C-G--C-C---T-T-----G-TG-A-A--C-----T--G-G--GC-T-A-C---T-T-G-A-G-T--G--C-AG----GA-G-A-----G-G-A-A--AG-C-----GG--A--ATT---C-C-T-A-      |                                                                                                                                                                               |   |     |    |    |   |     |    |   |    |   |   |   |   |    |    |   |    |   |   |   |   |   |   |   |    |
| GT--GT-A-G-CG-GT--G---A--A-A---TG-C-GT-AG--AT-A-TT--A-G--G-A-G-G-A-AC-A-CC--AG--T--G--GC-GAA-G--G-C--G-----G--C-T-T-T---CTG--G--AC-T-G-----T-A--A-C-T--GA--CA-C-T-G--A-GG--T-A-CG-A-AA-G-C---G-TG--GG-G--AG-C-           |                                                                                                                                                                               |   |     |    |    |   |     |    |   |    |   |   |   |   |    |    |   |    |   |   |   |   |   |   |   |    |
| A-AA-----CA--GG                                                                                                                                                                                                          | Bacteria(100);Firmicutes(100);Clostridia(100);Clostridiales(100);Family_XIII_Incertae_Sedis(100);unclassified(100);unclassified(100);unclassified(100);unclassified(100);     |   |     |    |    |   |     |    |   |    |   |   |   |   |    |    |   |    |   |   |   |   |   |   |   |    |
| Otu0437                                                                                                                                                                                                                  | 0                                                                                                                                                                             | 0 | 8   | 0  | 1  | 0 | 2   | 0  | 0 | 0  | 0 | 0 | 0 | 0 | 0  | 0  | 0 | 0  | 0 | 0 | 0 | 0 | 1 | 0 | 0 | 1  |
| 0                                                                                                                                                                                                                        | 1                                                                                                                                                                             | 4 | 2   | 0  | 16 | 2 | 0   | 0  | 3 | 35 | 2 | 4 | 0 | 0 | 68 | 0  | 0 | 0  | 0 | 0 | 0 | 2 | 0 | 2 | 0 | 0  |
| 0                                                                                                                                                                                                                        | 0                                                                                                                                                                             | 5 | 1   | 0  | 0  | 1 | 0   | 1  | 0 | 0  | 0 | 0 | 0 | 5 | 4  | 16 | 0 | 10 | 4 | 0 | 1 | 0 | 1 | 1 | 0 | 2  |
| 4                                                                                                                                                                                                                        | 4                                                                                                                                                                             | 0 | 14  | 57 | 0  | 2 | 2   | 0  | 7 | 0  | 0 | 0 | 1 | 0 | 1  | 0  | 2 | 0  | 0 | 0 | 0 | 0 | 0 | 1 | 2 | 0  |
| M02255_77_000000000-ADUT3_1_2118_28875_14859                                                                                                                                                                             | T---AC---GT-AG-GTC-----CCG-A-G-----C--G-T---T--AT-C-CGG-AT-----TT-A--T-T--GG-GC-----GT--A----AA-GC-GA-GC-----G-CA-G-G-C-G-----G--T-TA-G-A-T-----                              |   |     |    |    |   |     |    |   |    |   |   |   |   |    |    |   |    |   |   |   |   |   |   |   |    |
| -----AA---G-T-C-T-----G-A-A--G-TT--A-AA-GG--C-T-GT-G-G-----CT-T-AA-----C-C-A-T-A-G-T--A---C-G--C-T---T-T-----G--GA-A-A--C-----T--G-T--TT--A-A-C---T-T-G-A-G-T--G--C-AA----GA-G-G-----G-G-A-G--AG-T-----GG--A--ATT---C-C- |                                                                                                                                                                               |   |     |    |    |   |     |    |   |    |   |   |   |   |    |    |   |    |   |   |   |   |   |   |   |    |
| A-T-GT--GT-A-G-CG-GT--G---A--A-A---TG-C-GT-AG--AT-A-TA--T-G--G-A-G-G-A-AC-A-CC--GG--T--G--GC-GAA-A--G-C--G-----G--C-T-C-T---CTG--G--CT-T-G-----T-A--A-C-T--GA--CG-C-T-G--A-GG--C-T-CG-A-AA-G-C---G-TG--GG-G--            |                                                                                                                                                                               |   |     |    |    |   |     |    |   |    |   |   |   |   |    |    |   |    |   |   |   |   |   |   |   |    |
| AG-C-A-AA-----CA--GG                                                                                                                                                                                                     | Bacteria(100);Firmicutes(100);Bacilli(100);Lactobacillales(100);Streptococcaceae(100);Streptococcus(100);unclassified(100);unclassified(100);unclassified(100);               |   |     |    |    |   |     |    |   |    |   |   |   |   |    |    |   |    |   |   |   |   |   |   |   |    |
| Otu0438                                                                                                                                                                                                                  | 0                                                                                                                                                                             | 0 | 8   | 3  | 0  | 0 | 0   | 11 | 0 | 3  | 0 | 0 | 0 | 0 | 0  | 0  | 0 | 0  | 0 | 0 | 0 | 0 | 0 | 0 | 0 | 0  |
| 0                                                                                                                                                                                                                        | 0                                                                                                                                                                             | 0 | 21  | 0  | 0  | 0 | 0   | 0  | 0 | 0  | 0 | 0 | 0 | 0 | 0  | 0  | 0 | 0  | 0 | 0 | 0 | 0 | 0 | 0 | 0 | 0  |
| 0                                                                                                                                                                                                                        | 16                                                                                                                                                                            | 0 | 0   | 0  | 0  | 0 | 0   | 0  | 0 | 0  | 0 | 0 | 0 | 0 | 0  | 0  | 0 | 0  | 0 | 0 | 0 | 0 | 4 | 0 | 0 | 0  |
| 0                                                                                                                                                                                                                        | 0                                                                                                                                                                             | 0 | 0   | 0  | 0  | 0 | 0   | 0  | 0 | 0  | 0 | 0 | 0 | 0 | 0  | 0  | 0 | 0  | 0 | 0 | 0 | 0 | 0 | 0 | 0 | 0  |
| M02255_76_000000000-ADUNE_1_2106_15712_14830                                                                                                                                                                             | C---CG---GC-TA-ATT                                                                                                                                                            |   |     |    |    |   |     |    |   |    |   |   |   |   |    |    |   |    |   |   |   |   |   |   |   |    |



Otu0440 0 0 0 0 0 0 0 0 0 0 0 0 0 0 0 0 0 0 0 0 0 0 0 0 0 0 0 0 0 0  
0 0 0 0 0 0 0 0 0 0 0 0 0 0 0 0 0 0 0 0 0 0 0 0 0 0 0 4 8  
0 0 0 0 0 0 0 0 0 0 0 0 0 0 0 0 0 0 0 0 0 0 0 0 0 0 0 0 24  
0 0 0 0 16 0 0 0 0 0 0 0 0 0 0 0 0 0 0 0 0 0 0 0 0 0 0  
M02255\_77\_000000000-ADUT3\_1\_1105\_7662\_21624 C---A---GC-A-GCC-----GCG-G-T----A-A-T--A--CG-T-AGG-GC-----GC-A--A-G-CG-TT-----GT--C----CG-GA-AT-TA-----T-TG-G-G-C-G-----G--C-TG-G-T-C-----GC--  
--G-T-C-T-----G-T-C--G--TG--A-AA-AC--T-T-CC-G-G----CT-C-AA-----C-C-G-G-G-G-G--C-T---T-G--C-G--G--T-----G--GG-T-A--C-----G--G-G--CC-G-G-C---T-A-G-A-G-T--G---C-GG----TA-G-G-----G-G-T-A--AC-T-----GG--A--ACT---C-C-T-G-  
GT--GT-A-G-CG-GT--G---G--A-A---TG-C-GC-AG--AT-A-TC--A-G--G-A-A-G-A-AC-A-CC---GA--T--G--GC-GAA-G--G-C--A-----G--G-T-T-A---CTG--G--GC-C-G-----T-T---A-C-T--GA--CG-C-T-G--A-GG--A-G-CG-A--AA-G-C---G-TG--GG-G--AG-  
C-G-AA-----CA--GG Bacteria(100);Actinobacteria(100);Actinobacteria(100);Actinobacteridae(100);Actinomycetales(100);unclassified(100);unclassified(100);unclassified(100);unclassified(100);

Otu0441 0 0 0 0 0 0 0 0 0 0 0 0 0 0 0 0 26 0 0 3 0 0 1 0 0 0 1 0  
2 0 0 0 0 0 0 0 0 0 0 0 1 0 0 0 0 0 0 1 0 1 0 0 0 1 0 0 0  
0 0 1 0 0 0 1 0 0 0 0 0 0 0 0 0 0 0 0 0 0 0 0 0 0 0 0 0 0  
0 0 0 0 0 0 0 0 0 0 0 0 0 0 0 0 0 0 0 0 0 0 0 0 0 0 0 0  
M02255\_76\_000000000-ADUNE\_1\_1102\_13908\_5115 A---AG---CC-AC-G-G-----CTA-A-C-----T--A--C---G-TG-C-CAG-CA-----GC-C-G-C--GG-TA-----AT--A----CG-TA-GG-TG-----GCAA-GCG-T-G-----G--T-CT-C-G-G-----  
AA---G-T-C-T-----G-A-T--G--TG--A-AA-GC--C-C-CC-G-G----CT-C-AA-----C-C-G-G-G-G-A--G-----G-GT-C-A--T-T-----G--GA-A-A--C-----T--G-G--GA--G-A-C---T-T-G-A-G-G--A--C-AG----AA-G-A-----G-G-A-G--AG-T-----GG--A--ATT---C-C-  
A-A-GT--GT-A-G-CG-GT--G---A--A-A---TG-C-GT-AG--AT-A-TT--T-G--G-A-G-G-A-AC-A-CC--AG--T--G--GC-GAA-G--G-C--G-----G--C-T-C-T---CTG--G--TC-T-G-----T-T---A-C-T--GA--CG-C-T-G--A-GG--C-G-CG-A--AA-G-C---G-TG--GG-G--  
AG-C-A-AA-----CA--GG Bacteria(100);Firmicutes(100);Bacilli(100);Bacillales(100);unclassified(100);unclassified(100);unclassified(100);unclassified(100);unclassified(100);

Otu0442 0 0 0 0 0 0 0 0 0 0 0 0 3 0 0 0 0 0 0 0 0 0 0 0 0 0 2 6 0  
0 0 0 0 0 0 0 0 0 0 0 0 0 0 0 0 0 0 0 0 0 0 0 0 0 0 0 0  
0 0 0 0 0 0 0 0 0 0 0 0 0 0 0 0 0 0 0 0 0 0 0 5 0 0 0 0  
0 0 0 0 0 0 0 0 3 0 0 0 0 0 0 0 0 0 0 0 0 0 0 0 0 0 0  
M02255\_77\_000000000-ADUT3\_1\_2108\_9215\_14340 T---AC--GT-AG-GGT-----GCA-A-G-----C--G--T---T--GT-C-CGG-AA-----TT-A--T-T--GG-GC-----GT--A----AA-GA-GC-TC-----G-TA-G-G-C-G-----G--C-TT-G-T-C-----GC-  
---G-T-C-T-----G-C-T--G--TG--A-AA-AC--C-C-GA-G-G----CT-C-AA-----C-C-T-C-G-G-G--C-T---T-G--C-A--G--T-----G--GG-T-A--C-----G--G-G--CA--G-G-C---T-A-G-A-G-T--G---T-GG----TA-G-G-----G-G-A-G--AT-T-----GG--A--ATT---C-C-T-G-  
GT--GT-A-G-CG-GT--G---G--A-A---TG-C-GC-AG--AT-A-TC--A-G--G-A-G-G-A-AC-A-CC--GA--T--G--GC-GAA-G--G-C--A-----G--A-T-C-T---CTG--G--GC-C-A-----C-T---A-C-T--GA--CG-C-T-G--A-GG--A-G-CG-A--AA-G-C---A-TG--GG-G--AG-  
C-G-AA-----CA--GG Bacteria(100);Actinobacteria(100);Actinobacteria(100);Actinobacteridae(100);Actinomycetales(100);Micrococcineae(100);unclassified(74);unclassified(74);unclassified(74);

Otu0443 0 0 0 0 0 0 0 0 0 0 0 0 0 0 0 0 0 0 0 0 0 0 0 0 0 0 0 0  
0 0 0 0 0 0 0 0 0 0 0 0 0 0 0 0 33 0 0 0 0 0 0 0 0 0 0 0  
0 0 0 0 0 0 0 0 0 0 0 0 0 0 0 0 0 0 31 0 0 0 0 0 0 0 0  
0 0 0 0 0 0 0 0 0 0 0 0 0 0 0 0 0 0 0 0 0 69 0 0 0 0  
M02255\_77\_000000000-ADUT3\_1\_1118\_12861\_12177 T---AC--GT-AT-GTC-----GCA-A-G-----C--G--T---T--AT-C-CGG-AA-----TT-A--T-T--GG-GC-----TT--A----AA-GG-GC-AT-----C-TA-G-G-C-G-----G--T-TT-T-T-C-----  
---AA---G-T-C-A-----G-G-G--G--TG--A-AA-AC--T-T-AT-G-G----CT-C-AA-----C-T-A-T-A-A-G--C-T---T-G--C-C---T--T-----T--GA-A-A--C-----T--G-A--AA--A-A-C---T-A-G-A-G-T--A---C-TG----GA-A-A-----G-G-T-G--GG-T-----GG--A--ACT---A-C-  
A-C-GA--GT-A-G-AG-GT--G---A--A-A---TT-C-GT-AG--AT-A-TG--T-G--T-A-G-G-A-AT-G-CC--GA--T--G--AT-GAA-G--A-T--A-----A--C-T-C-A---CTG--G--AC-A-G-----A-A---A-C-T--GA--CG-C-T-G--A-AG--T-G-CG-A--AA-G-C---T-AG--GG-G--  
AG-C-A-AA-----CA--GG Bacteria(100);Fusobacteria(100);Fusobacteria(100);Fusobacteriales(100);Leptotrichiaceae(100);unclassified(100);unclassified(100);unclassified(100);unclassified(100);

Otu0444 0 0 0 0 0 0 0 0 0 0 0 0 0 0 0 0 0 0 0 0 0 0 0 0 0 0 0 0  
0 0 0 0 0 0 0 0 0 0 0 0 0 0 0 0 0 0 0 0 0 0 0 0 8 0 0 0  
0 0 0 0 0 0 0 0 0 0 0 0 0 0 0 0 0 21 0 0 0 0 0 0 0 0 0 0  
0 0 0 0 0 0 0 0 0 0 0 0 0 0 0 0 0 0 0 0 0 0 0 0 0 0  
M02255\_77\_000000000-ADUT3\_1\_1115\_13639\_23646 T---AC--GT-AG-GGT-----GCA-A-G-----C--G--T---T--GT-C-CGG-AA-----TT-A--T-T--GG-GC-----GT--A----AA-GA-GC-TC-----G-TA-G-G-C-G-----G--C-TT-G-T-C-----  
----GC---G-T-C-T-----G-C-T--G--TG--A-AA-TC--C-T-GA-G-G----CT-C-AA-----C-C-T-T-G-G-G--C-G---T-G--C-A--G--T-----G--GG-T-A--C-----G--G-G--CA--G-G-C---T-A-G-A-G-T--G---C-GG----TA-G-G-----G-G-A-G--AT-T-----GG--A--ATT---C-  
C-T-G-GT--GT-A-G-CG-GT--G---G--A-A---TG-C-GC-AG--AT-A-TC--A-G--G-A-G-G-A-AC-A-CC--GA--T--G--GC-GAA-G--G-C--A-----G--A-T-C-T---CTG--G--GC-C-G-----T-A---A-C-T--GA--CG-C-T-G--A-GG--A-G-CG-A--AA-G-C---A-TG--GG-  
G--AG-C-G-AA-----CA--GG Bacteria(100);Actinobacteria(100);Actinobacteria(100);Actinobacteridae(100);Actinomycetales(100);Micrococcineae(100);unclassified(73);unclassified(73);unclassified(73);



|                                                                                                                                                                                                                               |   |   |   |    |   |   |    |    |   |   |   |   |   |   |     |    |    |   |    |   |   |    |   |   |   |   |    |
|-------------------------------------------------------------------------------------------------------------------------------------------------------------------------------------------------------------------------------|---|---|---|----|---|---|----|----|---|---|---|---|---|---|-----|----|----|---|----|---|---|----|---|---|---|---|----|
| Otu0445                                                                                                                                                                                                                       | 0 | 0 | 0 | 0  | 0 | 0 | 0  | 0  | 0 | 0 | 0 | 0 | 0 | 0 | 0   | 0  | 0  | 0 | 0  | 0 | 0 | 0  | 0 | 0 | 0 | 0 | 0  |
|                                                                                                                                                                                                                               | 0 | 0 | 0 | 45 | 0 | 0 | 19 | 0  | 0 | 0 | 0 | 0 | 0 | 0 | 0   | 0  | 0  | 0 | 0  | 0 | 0 | 0  | 0 | 0 | 0 | 0 | 0  |
|                                                                                                                                                                                                                               | 0 | 0 | 0 | 0  | 0 | 0 | 0  | 0  | 0 | 0 | 0 | 0 | 0 | 0 | 0   | 0  | 0  | 0 | 0  | 0 | 0 | 0  | 0 | 0 | 0 | 0 | 0  |
|                                                                                                                                                                                                                               | 0 | 0 | 0 | 0  | 0 | 0 | 0  | 0  | 0 | 0 | 0 | 0 | 0 | 0 | 0   | 0  | 0  | 0 | 0  | 0 | 0 | 0  | 0 | 0 | 0 | 0 | 0  |
| M02255_77_000000000-ADUT3_1_2101_16239_10232                                                                                                                                                                                  |   |   |   |    |   |   |    |    |   |   |   |   |   |   |     |    |    |   |    |   |   |    |   |   |   |   |    |
| T---AC---AG-AG-GGG-----GCA-A-G-----C-G--T---T--GT-C-CGG-AT-----TG-A--C-T--GG-GC-----GT--A----AA-GC-GC-AC-----G-TA-G-G-T-G-----G--T-TG-G-T-T-----                                                                              |   |   |   |    |   |   |    |    |   |   |   |   |   |   |     |    |    |   |    |   |   |    |   |   |   |   |    |
| -----AC---G-T-G-G-----T-G-T--G--TG--A-AA-GC--T-C-AG-G-G-----CT-T-AA-----C-C-C-T-G-A-T--A-G---G-C--C-A---T-G-----C--CA-A-A---C-----G--A-A--TC--G-A-C---T-C-G-A-G-G--CT--G-AG---CA-G-A-----G-G-C-G---GG-T-----GG--A--ATT---     |   |   |   |    |   |   |    |    |   |   |   |   |   |   |     |    |    |   |    |   |   |    |   |   |   |   |    |
| G-C-C-G-GT--GT-A-G-TG-GT--G---A--A-A---TG-C-GT-AG--AG-A-TC--G-G--C-A-G-G-A-AC-A-CC---AA--G--G--GG-GAA-C--C-C-A-----G--C-C-C-G---CTG--G--GC-C-A-----G-T---C-C-T--GA--CA-C-T-G--A-GG--T-G-CG-A--CA-G-C---G-TG--                 |   |   |   |    |   |   |    |    |   |   |   |   |   |   |     |    |    |   |    |   |   |    |   |   |   |   |    |
| GG-G--AG-C-G-AA-----CA--GG Bacteria(100);unclassified(100);unclassified(100);unclassified(100);unclassified(100);unclassified(100);unclassified(100);unclassified(100);unclassified(100);                                     |   |   |   |    |   |   |    |    |   |   |   |   |   |   |     |    |    |   |    |   |   |    |   |   |   |   |    |
| Otu0446                                                                                                                                                                                                                       | 0 | 0 | 0 | 0  | 0 | 0 | 0  | 0  | 0 | 0 | 0 | 0 | 0 | 0 | 0   | 0  | 0  | 0 | 0  | 0 | 0 | 0  | 0 | 0 | 0 | 0 | 0  |
|                                                                                                                                                                                                                               | 0 | 0 | 0 | 0  | 0 | 1 | 0  | 7  | 0 | 2 | 0 | 0 | 0 | 0 | 0   | 0  | 0  | 1 | 15 | 0 | 0 | 0  | 0 | 0 | 0 | 0 | 35 |
|                                                                                                                                                                                                                               | 0 | 0 | 0 | 0  | 0 | 0 | 0  | 0  | 0 | 0 | 0 | 0 | 0 | 0 | 0   | 0  | 0  | 0 | 0  | 0 | 0 | 0  | 0 | 0 | 0 | 0 | 0  |
|                                                                                                                                                                                                                               | 0 | 0 | 0 | 0  | 0 | 0 | 0  | 0  | 0 | 0 | 0 | 0 | 0 | 0 | 0   | 0  | 0  | 0 | 0  | 0 | 0 | 0  | 0 | 0 | 0 | 0 | 0  |
| M02255_76_000000000-ADUNE_1_1106_27084_21255                                                                                                                                                                                  |   |   |   |    |   |   |    |    |   |   |   |   |   |   |     |    |    |   |    |   |   |    |   |   |   |   |    |
| C---TA---AC-TC-CGT-----GCC-A-G-----C---A--G--CC-G-CGG-TA-----AT-A--C-G--GA-GG-----GT--G---CA--A-GC--G-----T-TA-A-T-C-G-----G--T-TT-G-T-T-----                                                                                 |   |   |   |    |   |   |    |    |   |   |   |   |   |   |     |    |    |   |    |   |   |    |   |   |   |   |    |
| --AA---G-T-C-A-----G-A-T--G--TG--A-AA-TC--C-C-CG-G-G-----CT-C-AA-----C-C-T-G-G-G-A--A-C---T-G--C-A---T-C-----T--GA-T-A---C-----T--G-G--CA--A-G-C---T-T-G-A-G-T--C---T-CG---TA-G-A-----G-G-G-G---GG-T-----AG--A--ATT---C-C-    |   |   |   |    |   |   |    |    |   |   |   |   |   |   |     |    |    |   |    |   |   |    |   |   |   |   |    |
| A-G-GT--GT-A-G-CG-GT--G---A--A-A---TG-C-GT-AG--AG-A-TC--T-G--G-A-G-G-A-AT-A-CC---GG--T--G--GC-GAA-G--G-C-G-----G--C-C-C-C---CTG--G--AC-G-A-----A-G---A-C-T--GA--CG-C-T-C--A-GG--T-G-CG-A--AA-G-C---G-TG--GG-G--               |   |   |   |    |   |   |    |    |   |   |   |   |   |   |     |    |    |   |    |   |   |    |   |   |   |   |    |
| AG-C-A-AA-----CA--GG Bacteria(100);Proteobacteria(100);Gammaproteobacteria(100);Enterobacteriales(100);Enterobacteriaceae(100);Enteric_Bacteria_cluster(100);unclassified(100);unclassified(100);unclassified(100);           |   |   |   |    |   |   |    |    |   |   |   |   |   |   |     |    |    |   |    |   |   |    |   |   |   |   |    |
| Otu0447                                                                                                                                                                                                                       | 0 | 0 | 0 | 0  | 0 | 0 | 0  | 0  | 0 | 0 | 0 | 0 | 0 | 0 | 0   | 0  | 0  | 0 | 0  | 0 | 0 | 0  | 0 | 0 | 0 | 0 | 0  |
|                                                                                                                                                                                                                               | 0 | 0 | 0 | 0  | 0 | 0 | 0  | 79 | 0 | 0 | 0 | 0 | 0 | 0 | 0   | 0  | 0  | 0 | 0  | 0 | 0 | 0  | 0 | 0 | 0 | 0 | 0  |
|                                                                                                                                                                                                                               | 0 | 0 | 0 | 0  | 0 | 0 | 0  | 0  | 0 | 0 | 0 | 0 | 0 | 0 | 0   | 0  | 17 | 0 | 0  | 0 | 0 | 0  | 0 | 0 | 0 | 0 | 0  |
|                                                                                                                                                                                                                               | 0 | 0 | 0 | 0  | 0 | 0 | 0  | 0  | 0 | 0 | 0 | 0 | 0 | 0 | 0   | 0  | 0  | 0 | 0  | 0 | 0 | 0  | 0 | 0 | 0 | 0 | 0  |
| M02255_77_000000000-ADUT3_1_2102_14017_12727                                                                                                                                                                                  |   |   |   |    |   |   |    |    |   |   |   |   |   |   |     |    |    |   |    |   |   |    |   |   |   |   |    |
| T---AC---GA-AG-GGG-----GCT-A-G-----C-G--T---T--GT-T-CGG-AA-----TC-A--C-T--GG-GC-----GT--A----AA-GC-GC-AC-----G-TA-G-G-C-G-----G--A-TT-T-G-C-----                                                                              |   |   |   |    |   |   |    |    |   |   |   |   |   |   |     |    |    |   |    |   |   |    |   |   |   |   |    |
| -----CA---G-T-C-A-----G-G-G--G--TG--A-AA-TC--C-C-GG-G-G-----CT-C-AA-----C-C-T-C-G-G-A--A-C---T-G--C-C---T--T-----T--GA-T-A---C-----A--G-C-AA--G-T-C---T-A-G-A-G-T--C---C-GG---AA-G-A-----G-G-T-G---AG-T-----GG--A--ATT---C-C- |   |   |   |    |   |   |    |    |   |   |   |   |   |   |     |    |    |   |    |   |   |    |   |   |   |   |    |
| C-T-A-GT--GT-A-G-AG-GT--G---A--A-A---TT-C-GT-AG--AT-A-TT--A-G--G-A-G-G-A-AC-A-CC---AG--T--G--GC-GAA-G--G-C-G-----G--C-T-C-A---CTG--G--TC-C-G-----G-C---A-C-T--GA--CG-C-T-G--A-GG--T-G-CG-A--AA-G-C---G-TG--GG-G--             |   |   |   |    |   |   |    |    |   |   |   |   |   |   |     |    |    |   |    |   |   |    |   |   |   |   |    |
| G--AG-C-A-AA-----CA--GG Bacteria(100);Proteobacteria(100);Alphaproteobacteria(100);Rhizobiales(100);unclassified(100);unclassified(100);unclassified(100);unclassified(100);unclassified(100);                                |   |   |   |    |   |   |    |    |   |   |   |   |   |   |     |    |    |   |    |   |   |    |   |   |   |   |    |
| Otu0448                                                                                                                                                                                                                       | 0 | 0 | 0 | 0  | 0 | 0 | 0  | 0  | 0 | 0 | 0 | 0 | 0 | 0 | 0   | 0  | 0  | 0 | 0  | 0 | 0 | 0  | 0 | 0 | 0 | 0 | 0  |
|                                                                                                                                                                                                                               | 0 | 0 | 0 | 0  | 0 | 0 | 0  | 0  | 0 | 3 | 0 | 0 | 0 | 0 | 0   | 15 | 0  | 0 | 0  | 4 | 0 | 0  | 0 | 0 | 0 | 0 | 0  |
|                                                                                                                                                                                                                               | 0 | 0 | 0 | 0  | 0 | 0 | 0  | 0  | 0 | 0 | 0 | 0 | 0 | 0 | 0   | 0  | 0  | 0 | 0  | 0 | 0 | 0  | 0 | 0 | 0 | 0 | 0  |
|                                                                                                                                                                                                                               | 0 | 0 | 0 | 0  | 0 | 0 | 0  | 0  | 0 | 0 | 0 | 0 | 0 | 0 | 0   | 0  | 0  | 0 | 0  | 0 | 0 | 0  | 0 | 0 | 0 | 0 | 0  |
| M02255_76_000000000-ADUNE_1_1101_14237_10572                                                                                                                                                                                  |   |   |   |    |   |   |    |    |   |   |   |   |   |   |     |    |    |   |    |   |   |    |   |   |   |   |    |
| T---AA---CT-AC-GT-----GCC-A-G-----C--A--G---C--CG-C-GGT-AA-----TA-C--G-T--AG-GT-----GG--C-----AA-GC-G--TT-----G-TC-C-G---G-----A--T-GA-C-T-T-----                                                                             |   |   |   |    |   |   |    |    |   |   |   |   |   |   |     |    |    |   |    |   |   |    |   |   |   |   |    |
| --AA---G-T-C-T-----G-A-T--G--TG--A-AA-GC--C-C-AC-G-G-----CT-C-AA-----C-C-G-T-G-G-A--G-----G-GT-C-A---T--T-----G--GA-A-A---C-----T--G-G--GT--C-A-C---T-T-G-A-G-T--A---C-AG---AA-G-A-----G-G-A-A---AG-C-----GG--A--ATT---C-C-   |   |   |   |    |   |   |    |    |   |   |   |   |   |   |     |    |    |   |    |   |   |    |   |   |   |   |    |
| A-T-GT--GT-A-G-CG-GT--G---A--A-A---TG-C-GT-AG--AT-A-TA--T-G--G-A-G-G-A-AC-A-CC---AG--T--G--GC-GAA-A--G-C-G-----G--C-T-T-T---CTG--G--TC-T-G-----A-A---A-C-T--GA--CG-C-T-G--A-GG--C-T-CG-A--AA-G-C---G-TG--GG-G--               |   |   |   |    |   |   |    |    |   |   |   |   |   |   |     |    |    |   |    |   |   |    |   |   |   |   |    |
| AG-C-A-AA-----CA--GG Bacteria(100);Firmicutes(100);Bacilli(100);Lactobacillales(64);unclassified(64);unclassified(64);unclassified(64);unclassified(64);unclassified(64);                                                     |   |   |   |    |   |   |    |    |   |   |   |   |   |   |     |    |    |   |    |   |   |    |   |   |   |   |    |
| Otu0449                                                                                                                                                                                                                       | 0 | 0 | 0 | 0  | 0 | 0 | 0  | 0  | 0 | 0 | 0 | 0 | 0 | 0 | 0   | 0  | 0  | 0 | 0  | 0 | 0 | 0  | 0 | 0 | 0 | 0 | 0  |
|                                                                                                                                                                                                                               | 0 | 0 | 0 | 0  | 0 | 0 | 0  | 0  | 0 | 0 | 0 | 0 | 0 | 0 | 135 | 0  | 0  | 0 | 0  | 0 | 0 | 0  | 0 | 0 | 0 | 0 | 0  |
|                                                                                                                                                                                                                               | 0 | 0 | 0 | 0  | 0 | 0 | 0  | 0  | 0 | 0 | 0 | 0 | 0 | 0 | 0   | 0  | 69 | 0 | 0  | 0 | 0 | 37 | 0 | 0 | 0 | 0 | 0  |
|                                                                                                                                                                                                                               | 0 | 0 | 0 | 0  | 0 | 0 | 0  | 0  | 0 | 0 | 0 | 0 | 0 | 0 | 0   | 0  | 0  | 0 | 0  | 0 | 0 | 0  | 0 | 0 | 0 | 0 | 0  |
| M02255_77_000000000-ADUT3_1_1115_20036_18788                                                                                                                                                                                  |   |   |   |    |   |   |    |    |   |   |   |   |   |   |     |    |    |   |    |   |   |    |   |   |   |   |    |
| T---AC---GG-AG-GGA-----GCT-A-G-----C-G--T---T--GT-T-CGG-AA-----TT-A--C-T--GG-GC-----GT--A----AA-GA-GT-AC-----G-TA-G-G-C-G-----G--T-GA-T-T-C-----                                                                              |   |   |   |    |   |   |    |    |   |   |   |   |   |   |     |    |    |   |    |   |   |    |   |   |   |   |    |
| -----AA---G-T-C-A-----G-A-G--G--TG--A-AA-GC--C-T-GG-A-G-----CT-C-AA-----C-T-C-C-A-G-A--A-C---T-G--C-C---T--T-----T--GA-A-A---C-----T--A-G--AT--C-G-C---T-A-G-A-A-T--T--A-TG---GA-G-A-----G-G-T-T---AG-T-----GG--A--ATT---C-C- |   |   |   |    |   |   |    |    |   |   |   |   |   |   |     |    |    |   |    |   |   |    |   |   |   |   |    |
| C-G-A-GT--GT-A-G-AG-GT--G---A--A-A---TT-C-GT-AG--AT-A-TT--C-G--G-A-G-A-G-A-AC-A-CC---AG--T--G--GC-GAA-G--G-C-G-----A--C-T-A-A---CTG--G--AC-A-T-----A-T---A-T-T--GA--CG-C-T-G--A-GG--T-A-CG-A--AA-G-C---G-TG--GG-G--           |   |   |   |    |   |   |    |    |   |   |   |   |   |   |     |    |    |   |    |   |   |    |   |   |   |   |    |
| -AG-C-A-AA-----CA--GG Bacteria(100);Proteobacteria(100);Alphaproteobacteria(100);Sphingomonadales(100);unclassified(100);unclassified(100);unclassified(100);unclassified(100);unclassified(100);                             |   |   |   |    |   |   |    |    |   |   |   |   |   |   |     |    |    |   |    |   |   |    |   |   |   |   |    |



|                                                                                                                                                                                                                                                                                                                                                                                                                                                                                                                                                                                                                                                                                                                                                                                                                     |    |    |    |   |    |   |     |    |    |    |    |   |    |    |    |    |     |   |   |   |   |   |    |   |   |    |   |
|---------------------------------------------------------------------------------------------------------------------------------------------------------------------------------------------------------------------------------------------------------------------------------------------------------------------------------------------------------------------------------------------------------------------------------------------------------------------------------------------------------------------------------------------------------------------------------------------------------------------------------------------------------------------------------------------------------------------------------------------------------------------------------------------------------------------|----|----|----|---|----|---|-----|----|----|----|----|---|----|----|----|----|-----|---|---|---|---|---|----|---|---|----|---|
| Otu0450                                                                                                                                                                                                                                                                                                                                                                                                                                                                                                                                                                                                                                                                                                                                                                                                             | 0  | 0  | 0  | 0 | 0  | 0 | 0   | 0  | 0  | 0  | 1  | 2 | 4  | 1  | 1  | 0  | 0   | 1 | 2 | 0 | 0 | 1 | 0  | 0 | 0 | 0  | 0 |
|                                                                                                                                                                                                                                                                                                                                                                                                                                                                                                                                                                                                                                                                                                                                                                                                                     | 0  | 0  | 0  | 0 | 0  | 0 | 0   | 0  | 0  | 0  | 0  | 0 | 0  | 0  | 1  | 7  | 0   | 0 | 0 | 0 | 0 | 0 | 0  | 0 | 0 | 0  |   |
|                                                                                                                                                                                                                                                                                                                                                                                                                                                                                                                                                                                                                                                                                                                                                                                                                     | 0  | 0  | 0  | 0 | 0  | 0 | 0   | 0  | 0  | 0  | 0  | 0 | 0  | 0  | 0  | 0  | 0   | 0 | 0 | 0 | 1 | 0 | 0  | 0 | 0 | 0  |   |
|                                                                                                                                                                                                                                                                                                                                                                                                                                                                                                                                                                                                                                                                                                                                                                                                                     | 0  | 0  | 0  | 0 | 0  | 0 | 8   | 0  | 0  | 0  | 0  | 0 | 0  | 1  | 4  | 0  | 0   | 1 | 0 | 0 | 0 | 0 | 16 | 0 | 0 | 0  |   |
| M02255_76_000000000-ADUNE_1_2114_5933_17408 T---AC---AG-AG-GGT-----GCA-A-G-----C-G-T---T-AA-T-CGG-AA-----TT-A-C-T--GG-GC-----GT-A---AA-GC-GA-GC-----G-TA-G-G-T-G-----G-C-TT-G-A-T-----AA-<br>---G-T-C-A-----G-A-T-G--TG--A-AA-TC--C-C-CG-G-G-----CT-T-AA-----C-C-T-G-G-G-A-A-C---T-G--C-A--T-C-----T-GA-A-A--C-----T-G-T-TA-G-G-C---T-A-G-A-G-T-A--G-GT----GA-G-A-----G-G-G-A--AG-T-----AG-A--ATT---T-C-A-G-<br>GT--GT-A-G-CG-GT--G---A-A-A--TG-C-GT-AG--AG-A-TC-T-G--A-A-G-G-A-AT-A-CC--GA--T-G--GC-GAA-G-G-C-A-----G-C-T-T-C---CTG--G-CA-T-C-----A-T--A-C-T-GA-CA-C-T-G--A-GG--C-T-CG-A-AA-G-C--G-TG--GG-T--AG-C-<br>A-AA-----CA--GG Bacteria(100);Proteobacteria(100);Gammaproteobacteria(100);Pseudomonadales(100);Moraxellaceae(100);Psychrobacter(100);unclassified(100);unclassified(100);unclassified(100); |    |    |    |   |    |   |     |    |    |    |    |   |    |    |    |    |     |   |   |   |   |   |    |   |   |    |   |
| Otu0451                                                                                                                                                                                                                                                                                                                                                                                                                                                                                                                                                                                                                                                                                                                                                                                                             | 0  | 0  | 0  | 0 | 0  | 0 | 0   | 0  | 0  | 0  | 0  | 0 | 0  | 0  | 0  | 0  | 0   | 0 | 0 | 0 | 0 | 0 | 0  | 0 | 0 | 0  |   |
|                                                                                                                                                                                                                                                                                                                                                                                                                                                                                                                                                                                                                                                                                                                                                                                                                     | 0  | 0  | 7  | 0 | 0  | 0 | 103 | 0  | 0  | 10 | 18 | 0 | 0  | 0  | 68 | 0  | 187 | 0 | 0 | 0 | 0 | 0 | 0  | 0 | 1 | 1  | 0 |
|                                                                                                                                                                                                                                                                                                                                                                                                                                                                                                                                                                                                                                                                                                                                                                                                                     | 0  | 0  | 0  | 0 | 0  | 0 | 0   | 0  | 0  | 0  | 0  | 0 | 0  | 40 | 0  | 0  | 0   | 0 | 0 | 0 | 0 | 0 | 0  | 0 | 0 | 0  |   |
|                                                                                                                                                                                                                                                                                                                                                                                                                                                                                                                                                                                                                                                                                                                                                                                                                     | 38 | 14 | 0  | 0 | 0  | 0 | 0   | 0  | 61 | 0  | 0  | 0 | 0  | 0  | 0  | 0  | 18  | 0 | 0 | 0 | 0 | 0 | 0  | 0 | 0 | 0  |   |
| M02255_77_000000000-ADUT3_1_1101_13217_23345 T---AC---GT-AG-GTC-----TCA-A-G-----C-G-T---T--AT-C-CGG-AT-----TT-A-C-T--GG-GC-----GT-A---AA-GT-GT-CC-----G-TA-G-T-C-T-----G--A-AT-T-G-T-----<br>---AA---G-T-C-T-----G-T-T-T--TC--A-AA-TC--C-T-AC-G-A---CT-C-AA-----T-C-G-T-A-G-A-A-A--G-G--G-A--A-T-----G--GA-T-A--C-----T-G-C-AA-T-T-C---T-G-G-A-A-G-T--A-TC---TA-G-G-----G-G-T-T--AG-T-----GG--A--ATT---T-C-C-<br>G-GT--GG-A-G-CG-GT--G---A-A-A--TG-C-GT-TG--AT-A-TC-G-G--A-A-G-G-A-AC-G-CC--GA--A-A--GC-GAA-A-G-C-A-----G-C-T-A-A--CTA--T-AG-A-A-----T-A--C-T-T-GA-CG-A-T-G--A-GG--G-A-CG-A-CA-G-T---T-TG--GG-G--<br>AG-C-A-AA-----CA--GG Bacteria(100);unclassified(100);unclassified(100);unclassified(100);unclassified(100);unclassified(100);unclassified(100);unclassified(100);unclassified(100);            |    |    |    |   |    |   |     |    |    |    |    |   |    |    |    |    |     |   |   |   |   |   |    |   |   |    |   |
| Otu0452                                                                                                                                                                                                                                                                                                                                                                                                                                                                                                                                                                                                                                                                                                                                                                                                             | 5  | 0  | 2  | 6 | 0  | 0 | 5   | 8  | 0  | 4  | 0  | 0 | 0  | 0  | 0  | 0  | 0   | 0 | 2 | 0 | 0 | 0 | 0  | 0 | 0 | 0  |   |
|                                                                                                                                                                                                                                                                                                                                                                                                                                                                                                                                                                                                                                                                                                                                                                                                                     | 0  | 8  | 11 | 8 | 5  | 8 | 10  | 4  | 13 | 4  | 7  | 0 | 0  | 3  | 7  | 15 | 20  | 0 | 0 | 0 | 7 | 0 | 2  | 1 | 0 | 0  |   |
|                                                                                                                                                                                                                                                                                                                                                                                                                                                                                                                                                                                                                                                                                                                                                                                                                     | 0  | 3  | 0  | 0 | 0  | 0 | 0   | 0  | 0  | 0  | 0  | 0 | 0  | 0  | 1  | 3  | 3   | 0 | 3 | 5 | 0 | 0 | 5  | 0 | 5 | 0  |   |
|                                                                                                                                                                                                                                                                                                                                                                                                                                                                                                                                                                                                                                                                                                                                                                                                                     | 3  | 0  | 0  | 0 | 0  | 5 | 0   | 0  | 0  | 7  | 0  | 7 | 2  | 0  | 0  | 0  | 12  | 0 | 0 | 4 | 0 | 3 | 0  | 0 | 8 | 0  |   |
| M02255_77_000000000-ADUT3_1_2116_15911_18969 ....AC---T-AC-GT-----GCC-A-G-----C-A-G---C--CG-C-GGT-AA-----TA-C--G-T--AG-GT-----GG--C---AA-GC-G--TT-----A-TC-C-G---G-----A-A-TT-A-T-T-----<br>AA---G-T-C-T-----G-A-T-G--TG--A-AA-GC--C-C-AC-G-G---CT-C-AA-----C-C-G-T-G-G-A-G---G-GT-C-A--T-T-----G--GA-A-A--C-----T-G-G--GA--A-A-C---T-T-G-A-G-T-A--C-AG---AA-G-A-----G-G-A-A--AG-T-----GG--A--ATT---C-C-<br>A-T-GT--GT-A-G-CG-GT--G---A-A-A--TG-C-GC-AG--AG-A-TA-T-G--G-A-G-G-A-AC-A-CC--AG--T-G--GC-GAA-G-G-C-G-----A-C-T-T-T---CTG--G--TC-T-G-----T-A--A-C-T--GA--CG-C-T-G--A-TG--T-G-CG-A-AA-G-C--G-TG--GG-G--<br>AT-C-A-AA-----CA--GG Bacteria(100);Firmicutes(100);Bacilli(100);Bacillales(100);Staphylococcaceae(100);Staphylococcus(92);unclassified(92);unclassified(92);unclassified(92);                  |    |    |    |   |    |   |     |    |    |    |    |   |    |    |    |    |     |   |   |   |   |   |    |   |   |    |   |
| Otu0453                                                                                                                                                                                                                                                                                                                                                                                                                                                                                                                                                                                                                                                                                                                                                                                                             | 0  | 0  | 0  | 0 | 0  | 0 | 0   | 0  | 0  | 0  | 0  | 0 | 0  | 0  | 0  | 0  | 0   | 0 | 0 | 0 | 0 | 0 | 0  | 0 | 0 | 0  |   |
|                                                                                                                                                                                                                                                                                                                                                                                                                                                                                                                                                                                                                                                                                                                                                                                                                     | 0  | 0  | 0  | 0 | 0  | 0 | 0   | 39 | 0  | 0  | 8  | 0 | 13 | 0  | 0  | 21 | 0   | 0 | 0 | 0 | 0 | 0 | 0  | 0 | 0 | 0  |   |
|                                                                                                                                                                                                                                                                                                                                                                                                                                                                                                                                                                                                                                                                                                                                                                                                                     | 0  | 0  | 0  | 0 | 0  | 0 | 0   | 0  | 0  | 0  | 0  | 0 | 0  | 0  | 0  | 0  | 0   | 0 | 0 | 0 | 0 | 0 | 0  | 0 | 0 | 52 |   |
|                                                                                                                                                                                                                                                                                                                                                                                                                                                                                                                                                                                                                                                                                                                                                                                                                     | 0  | 0  | 7  | 0 | 76 | 0 | 0   | 3  | 0  | 0  | 0  | 0 | 0  | 0  | 0  | 0  | 0   | 0 | 0 | 9 | 0 | 0 | 0  | 0 | 0 | 0  |   |
| M02255_77_000000000-ADUT3_1_1110_23174_11741 T---AC---GT-AG-GGT-----GCG-A-G-----C-G--T---T--GT-C-AGG-AA-----TT-A-C-T--GG-GC-----GT-A---AA-GA-GC-TC-----G-TA-G-G-T-G-----G--T-TT-G-T-C-----<br>---GC---G-T-C-G-----T-T-T-G--TG--G-AA-TA-C-C-GG-G-G---CT-T-AA-----C-T-T-C-G-G-G-G-T---T-G--C-A--T-A-----C-GA-T-A--C-----G-G-G--CAT                                                                                                                                                                                                                                                                                                                                                                                                                                                                                    |    |    |    |   |    |   |     |    |    |    |    |   |    |    |    |    |     |   |   |   |   |   |    |   |   |    |   |



|                                                                                                                                                                                                                           |   |    |    |    |    |    |    |    |   |   |    |   |   |    |    |   |    |     |    |    |   |   |   |   |   |   |    |
|---------------------------------------------------------------------------------------------------------------------------------------------------------------------------------------------------------------------------|---|----|----|----|----|----|----|----|---|---|----|---|---|----|----|---|----|-----|----|----|---|---|---|---|---|---|----|
| Otu0455                                                                                                                                                                                                                   | 0 | 0  | 0  | 0  | 0  | 0  | 0  | 0  | 0 | 0 | 0  | 0 | 0 | 0  | 0  | 0 | 0  | 0   | 0  | 0  | 0 | 0 | 0 | 0 | 0 | 0 | 0  |
|                                                                                                                                                                                                                           | 0 | 0  | 0  | 0  | 0  | 0  | 0  | 0  | 0 | 0 | 18 | 0 | 0 | 0  | 0  | 0 | 0  | 0   | 0  | 0  | 0 | 0 | 0 | 0 | 0 | 0 | 0  |
|                                                                                                                                                                                                                           | 0 | 0  | 0  | 0  | 0  | 0  | 0  | 0  | 0 | 0 | 0  | 0 | 0 | 0  | 8  | 0 | 0  | 109 | 0  | 0  | 0 | 0 | 0 | 0 | 0 | 0 | 0  |
|                                                                                                                                                                                                                           | 0 | 0  | 0  | 25 | 0  | 0  | 0  | 0  | 0 | 0 | 0  | 0 | 0 | 0  | 7  | 0 | 0  | 0   | 0  | 0  | 0 | 0 | 0 | 0 | 0 | 0 | 0  |
| M02255_77_000000000-ADUT3_1_1104_20942_13462 T---AC---GG-AG-GGG-----GCT-A-G-----C-G--T---T--GT-T-CGG-AA-----TT-A--C-T--GG-GC-----GT-A----AA-GC-GC-GC-----G-TA-G-G-C-G-----G--C-TT-T-G-T-----                              |   |    |    |    |    |    |    |    |   |   |    |   |   |    |    |   |    |     |    |    |   |   |   |   |   |   |    |
| -----AA---G-T-T-A-----G-A-G--G--TG--A-AA-GC--C-C-GG-A-G----CT-C-AA-----C-T-T-C-G-G-A-A-T---T-G--C-C---T-T-----T-AA-G-A--C-----T--G-C-AT--C-G-C---T-T-G-A-A-C-A--C-GG----GA-G-A-----G-G-T-G--AG-T-----GG--A--ATT----C-     |   |    |    |    |    |    |    |    |   |   |    |   |   |    |    |   |    |     |    |    |   |   |   |   |   |   |    |
| C-G-A-GT--GT-A-G-AG-GT--G---A--A-A---TT-C-GT-AG--AT-A-TT--C-G--G-A-A-G-A-AC-A-CC---AG--T--G--GC-GAA-G--G-C-G-----A--C-T-C-A---CTG--G--AC-C-G-----T-T---G-T-T--GA--CG-C-T-G--A-GG--T-G-CG-A--AA-G-C---G-TG--GG-G-          |   |    |    |    |    |    |    |    |   |   |    |   |   |    |    |   |    |     |    |    |   |   |   |   |   |   |    |
| -AG-C-A-AA-----CA--GG Bacteria(100);Proteobacteria(100);Alphaproteobacteria(100);Sphingomonadales(100);unclassified(100);unclassified(100);unclassified(100);unclassified(100);unclassified(100);                         |   |    |    |    |    |    |    |    |   |   |    |   |   |    |    |   |    |     |    |    |   |   |   |   |   |   |    |
| Otu0456                                                                                                                                                                                                                   | 4 | 0  | 1  | 11 | 0  | 2  | 13 | 0  | 0 | 0 | 0  | 0 | 0 | 0  | 0  | 0 | 0  | 0   | 0  | 0  | 0 | 0 | 0 | 0 | 0 | 0 | 0  |
|                                                                                                                                                                                                                           | 0 | 3  | 1  | 2  | 13 | 5  | 23 | 5  | 0 | 8 | 3  | 3 | 0 | 0  | 0  | 0 | 0  | 0   | 0  | 1  | 0 | 0 | 1 | 0 | 0 | 0 | 2  |
|                                                                                                                                                                                                                           | 1 | 0  | 0  | 0  | 0  | 0  | 0  | 0  | 0 | 0 | 0  | 0 | 0 | 12 | 14 | 0 | 6  | 0   | 2  | 3  | 0 | 0 | 1 | 2 | 0 | 0 | 23 |
|                                                                                                                                                                                                                           | 4 | 12 | 14 | 19 | 17 | 3  | 0  | 0  | 0 | 0 | 0  | 0 | 0 | 3  | 0  | 0 | 5  | 0   | 21 | 25 | 0 | 0 | 0 | 0 | 0 | 0 | 33 |
| M02255_77_000000000-ADUT3_1_1116_12817_2941 C---GG---CT-A--ACT-----ACG-T-G-----C--C--A--G--CA-G-CCG-CG-----GT-A--A-T--AC-GT-----AG--G-----GT-GC-GA-GC-----GTTA-A-T-C-G-----GAAT-TA-C-T-T-----                             |   |    |    |    |    |    |    |    |   |   |    |   |   |    |    |   |    |     |    |    |   |   |   |   |   |   |    |
| AA---G-C-A-G-----G-A-T--G--TG--A-AA-TC--C-C-CG-G-G-----CT-C-AA-----C-C-T-G-G-G-A--A-C---T-G--C-G---T-T-----C--TG-A-A--C-----T--G-G-GT--A-G-C---T-A-G-A-G-T-A--T-GT---CA-G-A-----G-G-G-G---GG-T-----AG--A--ATT----C-C-A-   |   |    |    |    |    |    |    |    |   |   |    |   |   |    |    |   |    |     |    |    |   |   |   |   |   |   |    |
| C-GT--GT-A-G-CA-GT--G---A--A-A---TG-C-GT-AG--AG-A-TG--T-G--G-A-G-G-A-AT-A-CC---GA--T--G--GC-GAA-G--G-C-A-----G--C-C-C-C---CTG--G--GA-T-A-----A-T---A-C-T--GA--CG-T-T-C-A-TG--C-T-CG-A--AA-G-C---G-TG--GG-T--AG-           |   |    |    |    |    |    |    |    |   |   |    |   |   |    |    |   |    |     |    |    |   |   |   |   |   |   |    |
| C-A-AA-----CA--GG Bacteria(100);Proteobacteria(100);Betaproteobacteria(100);Neisseriales(100);Neisseriaceae(100);unclassified(100);unclassified(100);unclassified(100);unclassified(100);                                 |   |    |    |    |    |    |    |    |   |   |    |   |   |    |    |   |    |     |    |    |   |   |   |   |   |   |    |
| Otu0457                                                                                                                                                                                                                   | 0 | 0  | 0  | 0  | 0  | 0  | 0  | 0  | 0 | 0 | 0  | 0 | 0 | 0  | 0  | 0 | 0  | 0   | 0  | 0  | 0 | 0 | 0 | 0 | 0 | 0 | 0  |
|                                                                                                                                                                                                                           | 0 | 0  | 0  | 0  | 0  | 0  | 0  | 0  | 0 | 0 | 0  | 0 | 0 | 0  | 0  | 0 | 0  | 0   | 0  | 0  | 0 | 0 | 7 | 0 | 0 | 0 |    |
|                                                                                                                                                                                                                           | 0 | 0  | 0  | 0  | 0  | 0  | 0  | 0  | 0 | 0 | 0  | 0 | 0 | 0  | 0  | 0 | 0  | 0   | 0  | 1  | 0 | 0 | 0 | 0 | 0 | 0 |    |
|                                                                                                                                                                                                                           | 0 | 0  | 13 | 0  | 0  | 0  | 0  | 0  | 0 | 0 | 0  | 0 | 0 | 0  | 0  | 0 | 0  | 0   | 0  | 0  | 0 | 0 | 0 | 0 | 0 | 0 |    |
| M02255_77_000000000-ADUT3_1_2108_26013_22224 G---AC---GT-AG-GGC-----GCG-A-G-----C--G--T---T--GT-C-CGG-AT-----TT-A--T-T--GG-GC-----GT-A----AA-GA-GC-TC-----G-TA-G-G-C-G-----G--C-TT-G-T-T-----                             |   |    |    |    |    |    |    |    |   |   |    |   |   |    |    |   |    |     |    |    |   |   |   |   |   |   |    |
| -----GC---G-T-C-A-----G-C-T--G--TG--A-AA-GC--C-C-AT-G-G-----CT-T-AA-----C-T-G-T-G-G-G--T-T---G-G--C-A--G--C-----T--GA-T-A--C-----G--G-G--CA-G-G-C---T-A-G-A-G-T-T---C-GG----TA-G-G-----G-G-A-G---AC-T-----GG--A--ATT---   |   |    |    |    |    |    |    |    |   |   |    |   |   |    |    |   |    |     |    |    |   |   |   |   |   |   |    |
| C-C-T-G-GT--GT-A-G-CG-GT--G---A--A-A---TG-C-GC-AG--AT-A-TC--A-G--G-A-G-G-A-AC-A-CC---GG--T--G--GC-GAA-G--G-C-G-----G--G-T-C-T---CTG--G--GC-C-G-----A-T---A-C-T--GA--CG-C-T-G--A-GG--A-G-CG-A--AA-G-C---G-TG--             |   |    |    |    |    |    |    |    |   |   |    |   |   |    |    |   |    |     |    |    |   |   |   |   |   |   |    |
| GG-G--AG-C-G-AA-----CA--GG Bacteria(100);Actinobacteria(100);Actinobacteria(100);Actinobacteridae(100);Actinomycetales(100);Micromonosporineae(67);Micromonosporaceae(67);unclassified(67);unclassified(67);              |   |    |    |    |    |    |    |    |   |   |    |   |   |    |    |   |    |     |    |    |   |   |   |   |   |   |    |
| Otu0458                                                                                                                                                                                                                   | 0 | 0  | 0  | 0  | 0  | 0  | 0  | 0  | 0 | 0 | 0  | 0 | 0 | 0  | 0  | 0 | 0  | 0   | 0  | 0  | 0 | 0 | 0 | 0 | 0 | 0 | 0  |
|                                                                                                                                                                                                                           | 0 | 0  | 0  | 0  | 0  | 74 | 0  | 52 | 0 | 0 | 0  | 0 | 0 | 0  | 0  | 0 | 0  | 0   | 0  | 0  | 0 | 0 | 0 | 0 | 0 | 0 |    |
|                                                                                                                                                                                                                           | 0 | 0  | 0  | 0  | 0  | 0  | 0  | 0  | 0 | 0 | 0  | 0 | 0 | 0  | 0  | 0 | 0  | 0   | 0  | 0  | 0 | 0 | 0 | 0 | 0 | 0 |    |
|                                                                                                                                                                                                                           | 0 | 0  | 0  | 0  | 0  | 0  | 0  | 0  | 0 | 0 | 0  | 0 | 0 | 0  | 0  | 0 | 0  | 0   | 0  | 0  | 0 | 0 | 0 | 0 | 0 | 0 |    |
| M02255_77_000000000-ADUT3_1_1112_11043_19460 T---AC---GT-AG-GGT-----GCG-A-G-----C--G--T---T--AT-C-CGG-AA-----TC-A--T-T--GG-GC-----GT-A----AA-GA-GC-TC-----G-TA-G-G-C-G-----G--T-TC-A-A-C-----                             |   |    |    |    |    |    |    |    |   |   |    |   |   |    |    |   |    |     |    |    |   |   |   |   |   |   |    |
| -----AA---G-T-C-G-----G-C-T--G--TG--A-AA-GT--C-C-GA-G-G-----CT-C-AA-----C-C-T-C-G-G-A--A-T---T-G--C-A--G--T-----C--GA-T-A--CT-----G--T-T--GT--G-A-C---T-C-G-A-G-T-C---C-GG----TA-G-A-----G-G-A-G---AA-C-----GG--A--ATT--- |   |    |    |    |    |    |    |    |   |   |    |   |   |    |    |   |    |     |    |    |   |   |   |   |   |   |    |
| C-C-C-G-GT--GT-A-G-CG-GT--G---G--A-A---TG-C-GC-AG--AT-A-TC--G-G--G-A-G-G-A-AC-A-CC---AG--T--A--GC-GAA-G--G-C-G-----G--T-T-C-T---CTG--G--GC-C-G-----G-C---A-C-T--GA--CG-C-T-G--A-GG--A-G-CG-A--AA-G-C---G-TG--             |   |    |    |    |    |    |    |    |   |   |    |   |   |    |    |   |    |     |    |    |   |   |   |   |   |   |    |
| GG-G--AG-C-A-AA-----CA--GG Bacteria(100);unclassified(100);unclassified(100);unclassified(100);unclassified(100);unclassified(100);unclassified(100);unclassified(100);                                                   |   |    |    |    |    |    |    |    |   |   |    |   |   |    |    |   |    |     |    |    |   |   |   |   |   |   |    |
| Otu0459                                                                                                                                                                                                                   | 0 | 0  | 0  | 0  | 0  | 0  | 0  | 0  | 0 | 0 | 0  | 0 | 0 | 0  | 0  | 0 | 0  | 0   | 0  | 0  | 0 | 0 | 0 | 0 | 0 | 0 | 0  |
|                                                                                                                                                                                                                           | 0 | 0  | 0  | 0  | 0  | 0  | 0  | 0  | 0 | 0 | 0  | 0 | 0 | 0  | 0  | 0 | 0  | 0   | 0  | 0  | 0 | 0 | 0 | 0 | 0 | 0 |    |
|                                                                                                                                                                                                                           | 0 | 0  | 0  | 0  | 0  | 0  | 0  | 0  | 0 | 0 | 0  | 0 | 0 | 0  | 0  | 0 | 37 | 0   | 0  | 0  | 0 | 0 | 0 | 0 | 0 | 0 |    |
|                                                                                                                                                                                                                           | 0 | 0  | 0  | 0  | 0  | 0  | 0  | 0  | 0 | 0 | 0  | 0 | 0 | 0  | 0  | 0 | 0  | 0   | 0  | 0  | 0 | 0 | 0 | 0 | 0 | 0 |    |
| M02255_77_000000000-ADUT3_1_1116_13987_21727 T---AC---GA-AG-GGG-----GCT-A-G-----C--G--T---T--GC-T-CGG-AA-----TC-A--C-T--GG-GC-----GT-A----AA-GC-GC-AC-----G-TA-G-G-T-G-----G--G-TT-T-C-T-----                             |   |    |    |    |    |    |    |    |   |   |    |   |   |    |    |   |    |     |    |    |   |   |   |   |   |   |    |
| -----AA---G-T-C-A-----G-G-G--G--TG--A-AA-TC--C-T-GG-A-G-----CT-C-AA-----C-T-C-C-A-G-A--A-C---T-G--C-C---T-T-----T--GA-T-A--C-----T--G-G--AA--A-T-C---T-TGG-A-G-T-C---C-GG----GA-G-A-----G-G-T-G---GG-T-----GG--A--ACT---  |   |    |    |    |    |    |    |    |   |   |    |   |   |    |    |   |    |     |    |    |   |   |   |   |   |   |    |
| G-C-G-A-GT--GT-A-G-AG-GT--G---A--A-A---TT-C-GT-AG--AT-A-TT--C-G--C-A-A-G-A-AC-A-CC---AG--T--G--GC-GAA-G--G-C-G-----G--C-T-C-A---CTG--G--CC-C-G-----G-T---A-C-T--GA--CA-C-T-G--A-GG--T-G-CG-A--AA-G-C---G-TG--GG-          |   |    |    |    |    |    |    |    |   |   |    |   |   |    |    |   |    |     |    |    |   |   |   |   |   |   |    |
| G--AG-C-A-AA-----CA--GG Bacteria(100);Proteobacteria(100);Alphaproteobacteria(100);Rhizobiales(100);unclassified(100);unclassified(100);unclassified(100);unclassified(100);unclassified(100);                            |   |    |    |    |    |    |    |    |   |   |    |   |   |    |    |   |    |     |    |    |   |   |   |   |   |   |    |



|                                                                                                                                                                                                                             |   |    |    |    |   |    |   |    |   |    |   |   |   |    |    |    |    |    |   |   |    |   |    |   |   |    |    |
|-----------------------------------------------------------------------------------------------------------------------------------------------------------------------------------------------------------------------------|---|----|----|----|---|----|---|----|---|----|---|---|---|----|----|----|----|----|---|---|----|---|----|---|---|----|----|
| Otu0460                                                                                                                                                                                                                     | 0 | 0  | 0  | 46 | 0 | 0  | 0 | 0  | 0 | 0  | 0 | 0 | 0 | 0  | 0  | 0  | 0  | 0  | 0 | 0 | 0  | 0 | 0  | 0 | 0 | 0  | 0  |
|                                                                                                                                                                                                                             | 0 | 0  | 0  | 0  | 0 | 0  | 0 | 0  | 0 | 0  | 0 | 0 | 0 | 0  | 0  | 0  | 0  | 0  | 0 | 0 | 0  | 0 | 0  | 0 | 0 | 0  | 0  |
|                                                                                                                                                                                                                             | 0 | 0  | 0  | 0  | 0 | 0  | 0 | 0  | 0 | 0  | 0 | 0 | 0 | 0  | 0  | 0  | 0  | 0  | 0 | 0 | 8  | 0 | 0  | 0 | 0 | 0  | 0  |
|                                                                                                                                                                                                                             | 0 | 0  | 0  | 0  | 0 | 0  | 0 | 0  | 0 | 0  | 0 | 0 | 0 | 0  | 0  | 0  | 0  | 0  | 0 | 0 | 0  | 0 | 0  | 0 | 0 |    |    |
| M02255_77_000000000-ADUT3_1_1108_7467_8696 T---AC---GA-AG-GGG-----GCT-A-G-----C--G--T---T--GC-T-CGG-AA-----TG-A--C-T--GG-GC-----GT--A----AA-GG-GC-GC-----G-TA-G-G-C-G-----G--G-CG-G-C-A-----                                |   |    |    |    |   |    |   |    |   |    |   |   |   |    |    |    |    |    |   |   |    |   |    |   |   |    |    |
| CA---G-T-C-G-----G-G-C-G--TG--A-AA-TT--C-C-TG-G-G-----CT-T-AA-----C-C-T-G-G-G-G--G-C---T-G--C-G---T--C-----C--GA-G-A--C-----G--T-G--TT--G-C-C---T-A-G-A-G-T--G---G-GG-----AA-G-A-----G-G-G-T---CG-T-----GG--A--ATT---C-C-   |   |    |    |    |   |    |   |    |   |    |   |   |   |    |    |    |    |    |   |   |    |   |    |   |   |    |    |
| C-A-GT--GT-A-G-AG-GT--G---A--A-A---TT-C-GT-AG--AT-A-TT--G-G--G-A-A-G-A-AC-A-CC---GG--T--G--GC-GAA-G--G-C--G-----G--C-G-A-C---CTG--G--TC-C-T-----T-G---A-C-T--GA--CG-C-T-G--A-GG--C-G-CG-A--AA-G-C---G-TG--GG-G--            |   |    |    |    |   |    |   |    |   |    |   |   |   |    |    |    |    |    |   |   |    |   |    |   |   |    |    |
| AG-C-A-AA-----CA--GG Bacteria(100);Proteobacteria(100);Alphaproteobacteria(100);Rhodospirillales(100);Acetobacteraceae(100);unclassified(100);unclassified(100);unclassified(100);unclassified(100);                        |   |    |    |    |   |    |   |    |   |    |   |   |   |    |    |    |    |    |   |   |    |   |    |   |   |    |    |
| Otu0461                                                                                                                                                                                                                     | 0 | 0  | 0  | 0  | 0 | 0  | 0 | 0  | 0 | 0  | 0 | 0 | 0 | 0  | 0  | 0  | 0  | 0  | 0 | 0 | 0  | 0 | 0  | 0 | 0 | 0  | 0  |
|                                                                                                                                                                                                                             | 0 | 0  | 0  | 0  | 0 | 0  | 0 | 0  | 0 | 0  | 0 | 0 | 0 | 0  | 0  | 0  | 0  | 0  | 0 | 0 | 0  | 0 | 0  | 0 | 0 | 0  | 0  |
|                                                                                                                                                                                                                             | 0 | 0  | 0  | 0  | 0 | 0  | 0 | 0  | 0 | 0  | 0 | 0 | 0 | 0  | 0  | 0  | 0  | 32 | 0 | 0 | 5  | 0 | 0  | 0 | 0 | 0  | 0  |
|                                                                                                                                                                                                                             | 0 | 0  | 0  | 0  | 0 | 0  | 0 | 0  | 0 | 0  | 0 | 0 | 0 | 0  | 0  | 0  | 0  | 0  | 0 | 0 | 0  | 0 | 0  | 0 | 0 |    |    |
| M02255_77_000000000-ADUT3_1_2117_7960_11495 T---AC---GT-AG-GTG-----GCG-A-G-----C--G--T---T--GT-C-CGG-AA-----TT-A--C-T--GG-GC-----GT--A----AA-GG-GT-GC-----G-TA-G-G-C-G-----G--C-CT-G-G-T-----                               |   |    |    |    |   |    |   |    |   |    |   |   |   |    |    |    |    |    |   |   |    |   |    |   |   |    |    |
| AA---G-T-T-G-----A-G-C-G--TG--A-AA-TT--T-T-TG-G-G-----CT-C-AA-----C-C-C-A-A-A-G-G-G---A-G--C-G---C--T-----C--AA-T-A--C-----T--G-C--CG--G-G-C---T-T-G-A-G-T--G---C-GG---GA-G-A-----G-G-A-C---GG-C-----GG--A--ATT---C-C-      |   |    |    |    |   |    |   |    |   |    |   |   |   |    |    |    |    |    |   |   |    |   |    |   |   |    |    |
| C-G-GT--GT-A-G-CG-GT--G---A--A-A---TG-C-GT-AG--AT-A-TC--G-G--G-A-G-G-A-AC-A-CC---AG--T--G--GC-GAA-G--G-C--G-----G--C-C-G-T---CTG--G--AC-C-G-----T-A---A-C-T--GA--CG-C-T-G--A-GG--C-A-CG-A--AA-G-C---G-TG--GG-G--            |   |    |    |    |   |    |   |    |   |    |   |   |   |    |    |    |    |    |   |   |    |   |    |   |   |    |    |
| AG-C-A-AA-----CA--GG Bacteria(100);Firmicutes(100);Clostridia(100);Thermoanaerobacterales(100);Family_III_Incertae_Sedis(100);Caldicellulosiruptor(100);unclassified(100);unclassified(100);unclassified(100);              |   |    |    |    |   |    |   |    |   |    |   |   |   |    |    |    |    |    |   |   |    |   |    |   |   |    |    |
| Otu0462                                                                                                                                                                                                                     | 0 | 0  | 12 | 0  | 0 | 0  | 0 | 0  | 0 | 0  | 0 | 0 | 0 | 0  | 0  | 0  | 0  | 0  | 0 | 0 | 0  | 0 | 0  | 0 | 0 | 0  | 0  |
|                                                                                                                                                                                                                             | 0 | 0  | 0  | 0  | 0 | 35 | 0 | 46 | 0 | 0  | 0 | 0 | 0 | 0  | 0  | 0  | 0  | 0  | 0 | 0 | 0  | 0 | 0  | 0 | 0 | 11 | 0  |
|                                                                                                                                                                                                                             | 0 | 0  | 0  | 0  | 0 | 0  | 0 | 0  | 0 | 0  | 0 | 0 | 0 | 0  | 0  | 0  | 0  | 0  | 0 | 0 | 0  | 0 | 0  | 0 | 0 | 0  | 0  |
|                                                                                                                                                                                                                             | 0 | 0  | 0  | 0  | 0 | 0  | 0 | 0  | 0 | 0  | 0 | 0 | 0 | 0  | 29 | 0  | 0  | 0  | 0 | 0 | 0  | 0 | 0  | 0 | 6 | 0  | 0  |
| M02255_77_000000000-ADUT3_1_1104_25237_8885 T---AC---GT-AG-GGA-----CCA-A-G-----C--G--T---T--GT-T-CGG-AT-----TT-A--C-T--GG-GC-----GT--A----AA-GG-GA-GC-----G-TA-G-G-C-G-----G--C-AA-T-T-C-----AA-                            |   |    |    |    |   |    |   |    |   |    |   |   |   |    |    |    |    |    |   |   |    |   |    |   |   |    |    |
| ---G-T-C-A-----G-T-T--G--TG--A-AA-TC--T-C-CG-A-G-----CT-T-AA-----C-T-C-G-G-A-A--C-G---G-T--C-A--A--C-----T--GA-T-A--C-----T--G-C--TT--T-G-C---T-A-G-A-G-T--A--C-AG---AA-G-G-----G-G-C-A--AT-C-----GG--A--ATT---C-T-T-G-     |   |    |    |    |   |    |   |    |   |    |   |   |   |    |    |    |    |    |   |   |    |   |    |   |   |    |    |
| GT--GT-A-G-CG-GT--G---A--A-A---TG-C-GT-AG--AT-A-TC--A-A--G-A-G-G-A-AC-A-CC---TG--A--G--GT-GAA-G--A-C--G-----G--G-T-T-G---CTG--G--GC-T-G-----A-T---A-C-T--GA--CG-C-T-G--A-GG--C-T-CG-A--AA-G-C---T-AG--GG-G--AG-             |   |    |    |    |   |    |   |    |   |    |   |   |   |    |    |    |    |    |   |   |    |   |    |   |   |    |    |
| C-A-AA-----CG--GG Bacteria(100);Acidobacteria(100);Acidobacteria(100);Acidobacteriales(100);Acidobacteriaceae(100);Candidatus_Chloroacidobacterium(100);unclassified(100);unclassified(100);unclassified(100);              |   |    |    |    |   |    |   |    |   |    |   |   |   |    |    |    |    |    |   |   |    |   |    |   |   |    |    |
| Otu0463                                                                                                                                                                                                                     | 0 | 0  | 0  | 0  | 0 | 0  | 0 | 0  | 0 | 0  | 0 | 0 | 0 | 0  | 0  | 0  | 0  | 0  | 0 | 0 | 0  | 0 | 0  | 0 | 0 | 0  | 0  |
|                                                                                                                                                                                                                             | 0 | 0  | 0  | 0  | 0 | 0  | 0 | 0  | 0 | 0  | 0 | 0 | 0 | 0  | 0  | 0  | 0  | 52 | 0 | 0 | 0  | 0 | 0  | 0 | 0 | 0  | 0  |
|                                                                                                                                                                                                                             | 0 | 0  | 0  | 0  | 0 | 0  | 0 | 0  | 0 | 0  | 0 | 0 | 0 | 0  | 0  | 0  | 0  | 0  | 0 | 0 | 12 | 0 | 0  | 0 | 0 | 0  | 0  |
|                                                                                                                                                                                                                             | 0 | 0  | 0  | 0  | 0 | 0  | 0 | 0  | 0 | 0  | 0 | 0 | 0 | 79 | 0  | 0  | 0  | 0  | 0 | 0 | 0  | 0 | 0  | 0 | 0 | 0  | 0  |
| M02255_77_000000000-ADUT3_1_1103_27507_16166 G---AC---GG-GG-GGG-----GCT-A-G-----T--G--T---T--AT-T-CGG-AA-----TG-A--C-T--AG-GC-----GT--A----AA-GG-GC-AC-----G-TA-G-G-C-G-----G--T-GA-A-T-C----                               |   |    |    |    |   |    |   |    |   |    |   |   |   |    |    |    |    |    |   |   |    |   |    |   |   |    |    |
| -----CG---G-T-T-G-----A-A-A--G--TG--A-AA-GT--C-G-CC-A-G-----CT-C-AA-----C-T-G-G-C-G-G--A-A---T-G--C-T---T--T-----C--AA-A-A--C-----C--A-A--TT--C-A-C---T-T-G-A-G-T--A---A-GA---TA-G-A-----G-G-A-T---AG-T-----GG--A--ATT---T- |   |    |    |    |   |    |   |    |   |    |   |   |   |    |    |    |    |    |   |   |    |   |    |   |   |    |    |
| C-G-T-GT--GT-A-G-AG-AT--A---A--A-A---TT-C-AC-AG--AT-A-TA--C-G--A-A-G-G-A-AC-A-CC---AA--A--A--GC-GAA-G--G-C--A-----G--C-T-T-T---CTG--G--GT-C-T-----C-T---A-C-T--GA--CG-C-T-G--A-GG--T-G-CG-A--AA-G-C---A-TA--GG-G--          |   |    |    |    |   |    |   |    |   |    |   |   |   |    |    |    |    |    |   |   |    |   |    |   |   |    |    |
| AG-C-A-AA-----CA--GG Bacteria(100);unclassified(100);unclassified(100);unclassified(100);unclassified(100);unclassified(100);unclassified(100);unclassified(100);unclassified(100);                                         |   |    |    |    |   |    |   |    |   |    |   |   |   |    |    |    |    |    |   |   |    |   |    |   |   |    |    |
| Otu0464                                                                                                                                                                                                                     | 0 | 0  | 0  | 0  | 0 | 0  | 0 | 0  | 0 | 0  | 0 | 0 | 0 | 0  | 0  | 0  | 0  | 0  | 0 | 0 | 0  | 0 | 0  | 1 | 0 | 0  | 0  |
|                                                                                                                                                                                                                             | 1 | 0  | 0  | 1  | 0 | 0  | 0 | 0  | 0 | 10 | 0 | 0 | 0 | 0  | 69 | 14 | 38 | 0  | 0 | 0 | 0  | 0 | 0  | 0 | 0 | 0  | 0  |
|                                                                                                                                                                                                                             | 0 | 52 | 0  | 0  | 8 | 0  | 0 | 0  | 0 | 0  | 2 | 0 | 0 | 0  | 0  | 0  | 0  | 0  | 0 | 0 | 3  | 1 | 40 | 0 | 0 | 0  | 27 |
|                                                                                                                                                                                                                             | 6 | 24 | 28 | 0  | 0 | 0  | 1 | 0  | 0 | 11 | 0 | 0 | 2 | 0  | 0  | 0  | 0  | 0  | 0 | 0 | 0  | 0 | 0  | 1 | 0 | 0  | 0  |
| M02255_77_000000000-ADUT3_1_2117_21509_9922 .....AC---T-A--CGT-----GCC-A-G-----C--A--G---C--CG-C-GGT-AA-----TA-C--G-T--AG-GG-----TG--C----GA-GC-GT-TA-----A-TC-G-G---A-----A--T-TA-T-T-T-----AA----                         |   |    |    |    |   |    |   |    |   |    |   |   |   |    |    |    |    |    |   |   |    |   |    |   |   |    |    |
| G-C-C-A-----G-A-T--G--TG--A-AA-TC--C-C-CG-A-G-----CC-T-AA-----C-T-T-G-G-G-A--G-G---T-G--C-A--T--A-----T--GG-A-A--C-----T--G-G--GT--A-G-C---T-A-G-A-G-T--G---T-GT-----CA-G-A-----G-G-G-A--GG-T-----AG--A--ACT---C-C-A-C-     |   |    |    |    |   |    |   |    |   |    |   |   |   |    |    |    |    |    |   |   |    |   |    |   |   |    |    |
| GT--GT-A-G-CA-GT--G---A--A-A---TG-C-GT-AG--AG-A-TG--T-G--G-A-A-G-A-AT-A-CC---GA--T--G--GC-GAA-G--G-C--A-----G--C-C-T-C---CTG--G--GA-T-A-----A-C---A-C-T--GA--CG-T-T-G--A-GG--C-T-CG-A--AA-G-C---G-TG--GG-G--AG-             |   |    |    |    |   |    |   |    |   |    |   |   |   |    |    |    |    |    |   |   |    |   |    |   |   |    |    |
| C-A-AA-----CA--GG Bacteria(100);Proteobacteria(100);Betaproteobacteria(100);unclassified(100);unclassified(100);unclassified(100);unclassified(100);unclassified(100);unclassified(100);                                    |   |    |    |    |   |    |   |    |   |    |   |   |   |    |    |    |    |    |   |   |    |   |    |   |   |    |    |



Otu0465      0      0      0      0      0      0      0      0      0      0      0      0      0      0      0      0      0      0      0      0      0      0      0      0      0      0      0  
             0      0      0      0      0      0      0      0      0      0      0      0      0      0      15      0      0      0      0      0      0      0      0      0      0      0      0      0  
             0      0      0      0      0      0      0      0      0      0      0      0      0      0      0      0      0      16      0      0      0      0      0      0      0      0      0      0  
             0      0      0      0      0      0      0      0      0      0      0      0      0      0      0      10      0      0      0      0      0      0      0      0      0      0      0  
             M02255\_77\_000000000-ADUT3\_1\_1104\_15206\_13861      T---AC---GT-AG-GGG-----CCG-A-G-----C-G-T---T--GT-C-CGG-AG-----TT-A--T-T--GG-GC-----GT-A----AA-GC-GC-GC-----G-CA-G-G-C-G-----G--C-TT-G-G-C-----  
-----GC---G-C-C-C-----G-A-C--G-TG--A-AA-GC--C-C-CC-G-G----CT-T-AA-----C-C-G-G-G-A-G-A---G-T--C-G---T-C-----G--GG-G-A--C-----G--G-C--CG--G-G-C---T-T-G-A-G-G--G--C-GG----GA-G-A-----G-G-G-T---GG-T-----GG--A--ATT--  
---CCC-G-GT--GT-A-G-TG-GT--G---A--A-A---TG-C-GT-AG--AG-A-TC--G-G--G-A-G-G-A-AC-A-CC--TG--T--G--GC-GAA-G--G-C-G-----G--C-C-A-C---CTG--G--GC-C-G-----A-C---C-C-T--GA--CG-C-T-G--A-GG--C-G-CG-A--AG-G-C---G-TG--  
GG-G--AG-C-G-AA-----CG--GG Bacteria(100);Chloroflexi(100);Thermomicrobia(100);JG30-KF-CM45(100);unclassified(100);unclassified(100);unclassified(100);unclassified(100);unclassified(100);

Otu0466      0      0      0      0      0      0      0      0      0      0      0      0      0      0      0      0      0      0      0      0      0      0      0      0      0      0      0  
             0      0      0      0      0      0      0      0      0      0      0      33      0      0      0      0      0      0      0      0      0      0      0      16      0      0      0      0  
             0      0      0      0      0      0      0      0      0      0      0      0      3      0      31      0      0      0      80      0      125      0      1      0      0      0      0      0      0  
             0      0      0      0      0      0      0      0      0      91      0      73      0      0      1      0      0      0      0      0      0      0      0      0      0      0      0      0  
             M02255\_77\_000000000-ADUT3\_1\_1101\_21610\_23233      T---AC---AT-AT-GGG-----GCG-A-G-----C-G-T---T--GT-C-CGG-AT-----TT-A--T-T--GG-GT-----GT-A----AA-GG-GT-GC-----G-TA-G-G-C-G-----G--G-AA-A-G-T-----  
-----AA---G-T-T-A-----G-T-T--G-TG--A-AA-TC--C-C-AC-G-G----CT-T-AA-----C-C-G-T-G-G-A-C-T---T-G--C-A--A-C-----T--AA-A-A--C-----T--G-T--TT--T-T-C---T-G-G-A-G-T--A--T-CG----GA-G-A-----G-G-A-A--AG-C-----GG--A--ATT---T-  
C-T-A-GT--GT-A-G-CG-GT--G---A--A-A---TG-C-GT-AG--AT-A-TT--A-G--A-A-A-G-A-AC-A-CC--AA--A--G--GC-GAA-G--G-C-A-----G--C-T-T-T---CTG--G--AC-G-A-----T-A--A-C-T--GA--CG-C-T-G--A-GG--C-A-CG-A--AA-G-C---G-TG--GG-T-  
-AG-C-A-AA-----CA--GG      Bacteria(100);unclassified(100);unclassified(100);unclassified(100);unclassified(100);unclassified(100);unclassified(100);unclassified(100);unclassified(100);

Otu0467      0      0      0      136      0      0      0      0      0      0      0      0      0      0      0      0      0      0      0      0      0      0      0      0      0      0      0      1  
             0      0      0      0      0      0      0      0      0      0      0      0      0      0      0      0      0      0      0      0      0      0      0      0      0      0      0      0  
             0      0      0      0      0      0      0      0      0      0      0      0      0      0      0      0      0      0      0      0      0      0      0      0      0      0      0      0  
             0      0      0      0      0      0      0      0      0      0      0      0      0      0      0      0      0      0      0      0      0      0      0      0      0      0      0      0  
             M02255\_77\_000000000-ADUT3\_1\_1109\_26458\_5437      T---AC---GT-AT-GGG-----GCA-A-G-----C-G-T---T--GT-C-CGG-AA-----TT-A--T-T--GG-GC-----GT-A----AA-GG-GT-AC-----G-TA-G-G-T-G-----G--T-TA-T-T-T-----AA--  
--G-T-C-T-----G-A-A--T--TA--A-AA-GG--C-T-AT-G-G----CT-C-AA-----C-C-A-T-A-G-T--A-----A-G--G-T---T-C-----A--GA-T-A--C-----T--G-G--AT--A-A-C---T-T-G-A-G-T--A--G-AT----GA-G-G-----G-G-A-A--AA-T-----GG--A--ATT---C-C-A-T-GT-  
-GT-A-G-CG-GT--G---A--A-A---TG-C-GT-AG--AT-A-TA--T-G--G-A-G-G-A-AC-A-CC--AA--T--G--GC-GAA-G--G-C-A-----A--T-T-T-T---CTG--G--AA-T-C-----T-A--A-C-T--GA--CA-C-T-G--A-GG--T-A-CG-A--AG-G-C---G-TG--GG-T--AG-C-A-  
AA-----CA--GG      Bacteria(100);Firmicutes(100);Clostridia(100);Clostridiales(100);Family\_XI\_Incertae\_Sedis(100);Helcococcus(100);unclassified(100);unclassified(100);unclassified(100);

Otu0468      0      0      0      0      0      0      0      0      0      0      0      0      0      0      0      0      0      0      0      0      0      0      0      0      0      0      0      0  
             0      0      0      0      0      0      96      0      0      0      0      0      0      0      0      0      0      0      0      0      0      0      0      0      0      0      0      0  
             0      0      0      0      0      0      0      0      0      0      0      0      0      0      0      0      0      24      0      0      0      0      0      0      0      0      0      0  
             0      0      0      0      0      0      0      0      0      0      0      0      0      0      0      0      0      0      0      0      0      0      0      0      0      0      0      0  
             M02255\_77\_000000000-ADUT3\_1\_1115\_12808\_17728      T---AC---GT-AG-GGG-----GCG-A-G-----C-G-T---T--GT-C-CGG-AT-----TC-A--T-T--GG-GC-----GT-A----AA-GA-GC-TC-----G-TA-G-G-C-G-----G--C-TT-G-G-C-----  
-----AA---G-C-C-G-----G-G-T--G--TG--A-AA-AC--T-C-CA-G-G----CT-C-AA-----C-C-T-G-G-A-G-A-----C-G-CC-A--C-C-----C--GG-G-A--C-----T--G-C--TA-TG-G-C---T-A-G-A-G-T--C---C-GG----TA-G-G-----G-G-A-T---CA-C-----GG--A--ATT---  
C-C-T-G-GT--GT-A-G-CG-GT--G---A--A-A---TG-C-GC-AG--AT-A-TC--A-G--G-A-G-G-A-AC-A-CC--GG--T--G--GC-GAA-G--G-C-G-----G--T-G-A-T---CTG--G--GC-C-G-----G-C--A-C-T--GA--CG-C-T-G--A-GG--A-G-CG-A--AA-G-C---G-TG--  
GG-T--AG-C-A-AA-----CA--GG      Bacteria(100);Actinobacteria(100);Actinobacteria(100);unclassified(100);unclassified(100);unclassified(100);unclassified(100);unclassified(100);unclassified(100);

Otu0469      0      0      0      0      0      0      0      0      0      0      0      0      0      0      0      0      0      0      0      0      0      0      0      13      0      0      0      0      0  
             0      0      0      0      0      0      0      0      0      0      0      0      0      0      0      43      0      0      0      0      0      0      0      0      0      0      0      0  
             0      0      0      0      0      0      0      0      0      0      0      0      0      0      0      0      0      0      0      0      0      0      0      0      0      0      0      0  
             0      0      0      0      0      0      0      0      0      0      0      0      0      0      0      0      0      0      0      0      0      0      0      0      0      0      0      0  
             M02255\_77\_000000000-ADUT3\_1\_1101\_18980\_24149      G---AC---GA-GG-GAT-----CCT-A-G-----C-G-T---T--GT-T-CGG-AA-----TT-A--T-T--GG-GC-----GT-A----AA-GC-GG-GT-----G-TA-G-G-T-G-----G--C-TA-T-G-T-----  
-----AA---G-T-C-A-----G-G-T--G--TG--A-AA-GC--C-T-GG-G-G----CT-C-AA-----C-C-C-C-A-G-A--A-G---T-G--C-A--T-C-----T--GA-T-A--C-----T--G-C--GT--A-G-C---T-T-G-A-G-T--G--G-TA----GA-G-A-----G-G-A-T---AG-T-----AG--A--ATT---C-  
T-T-G-GT--GT-A-G-TG-GT--G---A--A-A---TA-C-GT-AG--AT-A-TC--A-A--G-A-G-G-A-AT-A-CC--GG--T--G--GC-GAA-G--G-C-G-----G--C-T-A-T---CTG--G--CT-A-C-----A-C--A-C-T--GA--CA-C-T-C--A-GA--C-C-CG-A--AA-G-T---G-CG--GG-G--  
AT-C-A-AA-----CA--GG      Bacteria(100);Proteobacteria(100);unclassified(77);unclassified(77);unclassified(77);unclassified(77);unclassified(77);unclassified(77);unclassified(77);



Otu0470 0 0 0 0 0 0 0 0 0 0 0 0 0 0 0 0 0 0 0 0 0 0 0 0 0 0 0 0  
0 0 0 0 0 0 0 0 0 0 0 0 0 0 0 14 0 0 0 0 0 0 0 0 11 4 0 0 0  
0 0 0 0 0 0 0 0 0 0 0 0 0 0 0 0 0 21 0 0 0 0 0 0 0 0 25 24  
0 0 0 0 0 0 0 0 0 0 0 0 0 0 0 0 0 0 0 0 0 0 0 0 0 0 0  
M02255\_76\_000000000-ADUNE\_1\_1104\_23670\_7426 C---CG---GC-TA-ACT-----CCG-T-G-----C-C-A--G--CA-G-CCG-CG-----GT-A--A-T-AC-GG-----AG--G----GT-GC-GA-GC-----G-TT-GTC-C-G-----G-A-TT-TAT-T-----  
AA---G-T-C-C-----G-G-G--G--TG--A-AA-GC--C-C-GT-T-G-----CT-C-AA-----C-A-A-C-G-G-A--A-C---T-G--C-C---C-T-----G--GA-T-A--C-----T--G-G-AA--G-G-C---T-T-G-A-G-T-A--C-AG-----AC-G-A-----G-G-T-T---GG-C-----GG--A--ATG---G-A-  
C-G-GA--GT-A-G-CG-GT--G---A-A-A---TG-C-AT-AG--AT-A-CC--G-T--C-C-A-G-A-AC-C-CC---GA--T--T--GC-GAA-G--G-C--A-----G--C-T-G-A---CTA--G--GC-T-G-----T-T---A-C-T--GA--CG-C-T-G--A-GG--C-A-CG-A--AA-G-C---G-TG--GG-G--  
AG-C-G-AA-----CA--GG Bacteria(100);Bacteroidetes(100);Sphingobacteria(100);Sphingobacteriales(100);unclassified(79);unclassified(79);unclassified(79);unclassified(79);unclassified(79);

Otu0471 0 0 0 0 0 0 0 0 0 0 0 0 0 0 0 0 0 0 0 0 0 0 0 0 0 0 0 0 0  
0 0 0 0 0 0 0 34 0 0 0 0 0 0 0 0 0 0 0 0 0 0 0 0 0 0 0 0 0  
0 0 0 0 0 0 0 0 0 0 0 0 0 0 0 0 0 26 0 0 0 0 0 0 0 0 0 0  
0 0 0 0 0 0 0 0 0 0 0 0 0 0 0 0 0 0 0 0 0 0 0 0 0 0 0  
M02255\_77\_000000000-ADUT3\_1\_1106\_26658\_13913 T---AC--GA-AG-GGG-----GCT-A-G-----C-G-T--T--GT-T-CGG-AA-----TT-A--C-T--GG-GC-----GT--A---AA-GC-GT-AT-----G-CA-G-G-C-G-----G--A-TC-G-T-T-----  
-----AA---G-T-C-G-----G-G-G--G--TG--A-AA-TC--C-C-GA-G-G----CT-C-AA-----C-C-T-C-G-G-A--A-C---T-G--C-C---T-T-----C--GA-T-A--C-----T--G-A-CG-A-T-C---T-T-G-A-G-T-C---C-GG-----GA-G-A-----G-G-T-G---AG-T-----GG--A--ACT---C-  
C-G-A-GT--GT-A-G-AG-GT--G---A-A-A---TT-C-GT-AG--AT-A-TT--C-G--G-A-A-G-A-AC-A-CC---AG--T--G--GC-GAA-G--G-C--G-----G--C-T-C-A---CTG--G--CC-C-G-----G-C---A-C-T--GA--CG-C-T-G--A-GA--T-A-CG-A--AA-G-C---G-TG--GG-  
G--AG-C-A-AA-----CA--GG Bacteria(100);Proteobacteria(100);Alphaproteobacteria(100);unclassified(100);unclassified(100);unclassified(100);unclassified(100);unclassified(100);unclassified(100);

Otu0472 0 0 0 0 0 0 0 0 0 0 0 0 0 0 0 0 0 0 0 0 0 0 0 0 0 0 0 0  
0 0 0 0 0 0 0 61 0 0 0 0 0 0 0 0 0 58 0 0 0 0 0 0 0 0 0 0 0  
0 0 0 0 0 0 0 0 0 0 0 0 0 0 0 0 0 0 0 0 0 0 0 0 0 0 0  
0 0 0 0 0 0 0 0 0 0 0 0 0 0 0 0 0 0 0 0 0 0 0 0 0 0  
M02255\_77\_000000000-ADUT3\_1\_1109\_25525\_16039 T---AC--GT-AG-GTG-----GCG-A-G-----C-G-T--T--GT-C-CGG-AT-----TT-A--C-T--GG-GC-----GT--A---AA-GA-GC-GC-----G-CA-G-G-C-G-----G--T-CA-A-T-C-----  
-----AA---G-T-C-G-----A-G-T--G--TG--A-AA-GC--C-C-CC-G-G----CT-C-AA-----C-T-G-G-G-G-A--G-G---G-T--C-A--C--T-----C--GA-T-A--C-----T--G-C--TT--G-A-C---T-C-G-A-A-G--G---C-GG-----GA-G-A-----G-G-G-A--AG-T-----GG--A--ATT---  
C-C-C-G-GT--GT-A-G-TG-GT--G---A-A-A---TG-C-GT-AG--AT-A-TC--G-G--G-A-G-G-A-AC-A-CC---AG--T--G--GC-GAA-G--G-C--G-----A--C-T-T-C---CTG--G--CC-C-G-----T-T---C-T-T--GA--CG-C-T-G--A-GG--C-G-CG-A--AA-G-C---T-AG--GG-  
G--AG-C-A-AA-----CG--GG Bacteria(100);Chloroflexi(100);KD4-96(100);unclassified(100);unclassified(100);unclassified(100);unclassified(100);unclassified(100);unclassified(100);

Otu0473 0 0 0 10 0 5 0 6 0 35 0 0 0 0 0 0 0 0 0 0 0 0 0 1 0 0 0 0 0  
0 0 22 0 83 0 96 0 0 0 14 40 0 35 0 0 0 0 0 0 0 0 0 24 0 5 0 0 124  
21 0 15 0 4 0 0 0 0 0 0 0 3 0 10 11 0 3 0 4 6 0 0 0 56 0 0 89 17  
13 84 0 30 46 46 12 1 0 50 0 0 0 22 0 14 0 117 0 0 183 0 0 1 0 0 12  
M02255\_77\_000000000-ADUT3\_1\_1108\_6786\_13362 T---AC--GT-AG-GGG-----GCA-A-G-----C-G-T--T--AT-C-CGG-AT-----TT-A--C-T--GG-GT-----GT--A---AA-GG-GA-GC-----G-TA-G-A-C-G-----G--A-AT-G-G-C-----  
AA---G-T-C-T-----G-A-A--G--TG--A-AA-AC--C-C-CG-G-G----CT-C-AA-----C-C-T-G-G-G-A--A-C---T-G--C-T---T-T-----G--GA-A-A--C-----T--G-T--TG--T-T-C---T-A-G-A-G-T--G---T-TG-----GA-G-A-----G-G-T-A--AG-T-----GG--A--ATT---C-C-T-  
G-GT--GT-A-G-CG-GT--G---A-A-A---TG-C-GT-AG--AT-A-TC--A-G--G-A-A-G-A-AC-A-CC---GG--A--G--GC-GAA-G--G-C--G-----G--C-T-T-A---CTG--G--AC-A-A-----T-A---A-C-T--GA--CG-T-T-G--A-GG--C-T-CG-A--AA-G-C---G-TG--GG-G--  
AT-C-A-AA-----CA--GG Bacteria(100);Firmicutes(100);Clostridia(100);Clostridiales(100);Lachnospiraceae(100);Oribacterium(100);unclassified(100);unclassified(100);unclassified(100);

Otu0474 0 0 0 0 0 0 0 0 0 0 0 0 0 0 0 0 0 0 0 0 0 0 0 0 0 0 0 0  
0 0 0 0 0 0 0 0 0 0 0 0 0 0 0 0 0 0 0 0 0 0 0 0 0 0 0  
0 0 0 0 0 0 0 0 0 0 0 0 0 0 0 0 45 0 0 0 0 0 0 0 0 0 0  
0 0 0 0 0 0 0 0 0 0 0 0 0 0 0 0 0 0 0 0 0 0 0 0 0  
M02255\_77\_000000000-ADUT3\_1\_1108\_2209\_11142 T---AC--GT-AG-GGG-----CCT-A-G-----C-G-T--T--GT-C-CGG-AT-----TT-A--T-T--GG-GC-----GT--A---AA-GA-GC-TC-----G-TA-G-G-C-G-----G--T-TC-G-G-C-----AA-  
---G-T-C-G-----G-A-T--G--TG--A-AA-TC--T-C-CA-C-G----CT-T-AA-----C-G-T-G-G-A-G--G-G---G-C--C-A--T-T-----C--GA-A-A--C-----T--G-C-CGT--G-A-C---T-C-G-A-G-T--C---C-GG-----TA-G-G-----G-G-A-G--TG-T-----GG--A--ATT---C-C-T-G-  
GT--GT-A-G-CG-GT--G---A-A-A---TG-C-GC-AG--AT-A-TC--A-G--G-A-G-G-A-AC-A-CC---AG--T--A--GC-GAA-G--G-C--G-----G--C-A-C-T---CTG--G--GC-C-G-----G-T---A-C-T--GA--CG-C-T-G--A-GG--A-G-CG-A--AA-G-C---G-TG--GG-G--AG-  
C-G-AA-----CA--GG Bacteria(100);Actinobacteria(100);Actinobacteria(100);unclassified(100);unclassified(100);unclassified(100);unclassified(100);unclassified(100);unclassified(100);



[illegible]



|         |                                                                                                                                                                                                                                                                                                                                                                                                                                                                                                                                                                                                                                                                                                                                                                                                                 |   |   |   |   |    |   |   |   |   |    |   |   |   |   |   |    |   |   |   |   |   |   |   |   |    |   |
|---------|-----------------------------------------------------------------------------------------------------------------------------------------------------------------------------------------------------------------------------------------------------------------------------------------------------------------------------------------------------------------------------------------------------------------------------------------------------------------------------------------------------------------------------------------------------------------------------------------------------------------------------------------------------------------------------------------------------------------------------------------------------------------------------------------------------------------|---|---|---|---|----|---|---|---|---|----|---|---|---|---|---|----|---|---|---|---|---|---|---|---|----|---|
| Otu0480 | 0                                                                                                                                                                                                                                                                                                                                                                                                                                                                                                                                                                                                                                                                                                                                                                                                               | 0 | 0 | 0 | 0 | 0  | 0 | 0 | 0 | 0 | 0  | 0 | 0 | 0 | 0 | 0 | 0  | 0 | 0 | 0 | 0 | 0 | 0 | 0 | 0 | 0  | 0 |
|         | 0                                                                                                                                                                                                                                                                                                                                                                                                                                                                                                                                                                                                                                                                                                                                                                                                               | 0 | 0 | 0 | 0 | 31 | 0 | 0 | 0 | 0 | 0  | 0 | 0 | 0 | 0 | 0 | 0  | 0 | 0 | 0 | 0 | 0 | 0 | 0 | 0 | 0  | 0 |
|         | 0                                                                                                                                                                                                                                                                                                                                                                                                                                                                                                                                                                                                                                                                                                                                                                                                               | 0 | 0 | 0 | 0 | 0  | 0 | 0 | 0 | 0 | 0  | 0 | 0 | 0 | 0 | 0 | 22 | 0 | 0 | 0 | 0 | 0 | 0 | 0 | 0 | 0  | 0 |
|         | 0                                                                                                                                                                                                                                                                                                                                                                                                                                                                                                                                                                                                                                                                                                                                                                                                               | 0 | 0 | 0 | 0 | 0  | 0 | 0 | 0 | 0 | 0  | 0 | 0 | 0 | 0 | 0 | 0  | 0 | 0 | 0 | 0 | 0 | 0 | 0 | 0 | 0  | 0 |
|         | M02255_77_000000000-ADUT3_1_1117_12614_13891 C---AC--GT-AG-GGG-----GCG-A-G----C-G-T--T-GT-C-CGG-AT-----TT-A--T-T-GG-GC-----GT--A----AA-GA-GC-TC-----G-TA-G-G-C-G-----G-T-TT-G-G-C-----AA---G-T-C-G-----G-G-T-G-TG--A-AA-GC--T-C-GA-G-G---CT-C-AA-----C-C-T-C-G-A-G--A-----C-G-CC-A--C-T-----C-GA-T-A--C-----T-G-C--CA-TG-A-C---T-G-G-A-G-T--C--C-GG---TA-G-A-----G-G-A-G---TG-T-----GG--A--ATT---C-C-T-G-GT--GT-A-G-CG-GT--G--A--A-A--TG-C-GC-AG--AT-A-TC--A-G--G-A-G-G-A-AC-A-CC--AA--C--G--GC-GAA-G--G-C-A-----G--C-A-C-T--CTG--G--GC-C-G-----G-T--A-C-T-GA--CG-C-T-G--A-GG--A-G-CG-A-AA-G-C--G-TG--GG-G--AG-C-A-AA-----CA--GG Bacteria(100);Actinobacteria(100);Actinobacteria(100);Acidimicrobiidae(100);Acidimicrobiales(100);Acidimicrobineae(100);unclassified(100);unclassified(100);unclassified(100); |   |   |   |   |    |   |   |   |   |    |   |   |   |   |   |    |   |   |   |   |   |   |   |   |    |   |
| Otu0481 | 0                                                                                                                                                                                                                                                                                                                                                                                                                                                                                                                                                                                                                                                                                                                                                                                                               | 0 | 0 | 2 | 0 | 0  | 0 | 0 | 0 | 0 | 0  | 0 | 0 | 0 | 0 | 0 | 0  | 0 | 0 | 0 | 0 | 0 | 0 | 0 | 0 | 0  | 0 |
|         | 0                                                                                                                                                                                                                                                                                                                                                                                                                                                                                                                                                                                                                                                                                                                                                                                                               | 0 | 0 | 0 | 0 | 0  | 0 | 0 | 0 | 0 | 0  | 0 | 0 | 0 | 0 | 0 | 0  | 0 | 0 | 0 | 0 | 0 | 0 | 0 | 0 | 0  | 0 |
|         | 0                                                                                                                                                                                                                                                                                                                                                                                                                                                                                                                                                                                                                                                                                                                                                                                                               | 0 | 0 | 0 | 0 | 0  | 0 | 0 | 0 | 0 | 0  | 0 | 0 | 0 | 0 | 0 | 0  | 0 | 0 | 0 | 0 | 0 | 0 | 0 | 0 | 0  | 0 |
|         | 0                                                                                                                                                                                                                                                                                                                                                                                                                                                                                                                                                                                                                                                                                                                                                                                                               | 0 | 0 | 0 | 0 | 0  | 0 | 0 | 0 | 0 | 0  | 0 | 0 | 0 | 0 | 1 | 0  | 0 | 6 | 9 | 0 | 0 | 0 | 0 | 0 | 13 | 0 |
|         | M02255_76_000000000-ADUNE_1_2107_13385_22829 C---GG--CT-AA-TTC-----CGT-G-C-----C--A--G--C--AG-C-CGC-GG-----TA-A--T-A-CG-GA-----AG--G---TC-CG-G-GC-----G-TT-A-T-C-C-----G--G-AG-A-T-T-----TA---T-T-G-T-----G-T-T-G-TG--A-AA-TG--T-A-GA-C-G---CT-C-AA-----C-G-T-C-T-G-A--C-T---T-G--C-A--G--C-----G--CA-T-A--C-----T-G-G--TT-T-C-C---T-T-G-A-G-T-A--C-GC---AC-A-A-----C-G-T-T--GG-C---GG--A--ATT---C-G-T-C-GT--GT-A-G-CG-GT--G--A--A-A--TG-C-TT-AG--AT-A-TG--A-C--G-A-G-A-G-A-AC-T-CC--GA--T--T-GC-GAA-G--G-C-A-----G--C-T-G-A--CGG--G--AG-C-G-----C-A--A-C-T-GA--CG-C-T-T--A-AG--C-T-CG-A--AG-G-T--G-CG--GG-T--AT-C-G-AA-----CA--GG Bacteria(100);Bacteroidetes(100);Bacteroidia(100);Bacteroidales(100);Prevotellaceae(100);Prevotella(100);unclassified(100);unclassified(100);unclassified(100);              |   |   |   |   |    |   |   |   |   |    |   |   |   |   |   |    |   |   |   |   |   |   |   |   |    |   |
| Otu0482 | 0                                                                                                                                                                                                                                                                                                                                                                                                                                                                                                                                                                                                                                                                                                                                                                                                               | 0 | 0 | 0 | 0 | 0  | 0 | 0 | 0 | 0 | 48 | 1 | 0 | 0 | 0 | 0 | 0  | 0 | 0 | 0 | 0 | 0 | 0 | 0 | 0 | 0  | 0 |
|         | 0                                                                                                                                                                                                                                                                                                                                                                                                                                                                                                                                                                                                                                                                                                                                                                                                               | 0 | 0 | 0 | 0 | 0  | 0 | 0 | 0 | 0 | 0  | 0 | 0 | 0 | 0 | 0 | 1  | 0 | 0 | 0 | 0 | 0 | 0 | 0 | 0 | 0  | 0 |
|         | 0                                                                                                                                                                                                                                                                                                                                                                                                                                                                                                                                                                                                                                                                                                                                                                                                               | 0 | 0 | 0 | 0 | 0  | 0 | 0 | 0 | 0 | 0  | 0 | 0 | 0 | 0 | 0 | 1  | 0 | 0 | 0 | 0 | 1 | 1 | 0 | 0 | 0  | 0 |
|         | 0                                                                                                                                                                                                                                                                                                                                                                                                                                                                                                                                                                                                                                                                                                                                                                                                               | 0 | 0 | 0 | 0 | 1  | 0 | 0 | 1 | 1 | 0  | 0 | 0 | 0 | 0 | 0 | 0  | 1 | 0 | 0 | 0 | 0 | 3 | 0 | 0 | 0  | 0 |
|         | M02255_77_000000000-ADUT3_1_1106_13712_20111 T---AC--GT-AG-GTG-----GCA-A-G-----C--G--T--T-GT-C-CGG-AT-----TT-A--T-----T-----G--G-----G-CA-G-G-C-G-----G--T-TC-T-T-T-----AA---G-T-C-T-----G-A-T-G-TG--A-AA-GC--C-C-CC-G-G---CT-C-AA-----C-C-G-G-G-G-A--G-----G-GT-C-A--T--T-----G--GA-A-A--C-----T--G-G--AG--A-A-C---T-T-G-A-G-T-G--C-AG---AA-G-A-----G-G-A-G--AG-T-----GG--A--ATT---C-C-A-C-GT--GT-A-G-CG-GT--G--A--A-A--TG-C-GT-AG--AT-A-TG--T-G--G-A-G-G-A-AC-A-CC--AG--T--G--GC-GAA-G--G-C--G-----A--C-T-C-T--CTG--G--TC-T-G-----T-A--A-C-T-GA--CG-C-T-G--A-GG--C-T-CG-A--AA-G-C--G-TG--GG-G--AG-C-A-AA-----CA--GG Bacteria(100);Firmicutes(100);Bacilli(100);Lactobacillales(67);Carnobacteriaceae(67);Carnobacterium(67);unclassified(67);unclassified(67);unclassified(67);                               |   |   |   |   |    |   |   |   |   |    |   |   |   |   |   |    |   |   |   |   |   |   |   |   |    |   |
| Otu0483 | 0                                                                                                                                                                                                                                                                                                                                                                                                                                                                                                                                                                                                                                                                                                                                                                                                               | 0 | 0 | 0 | 0 | 0  | 0 | 0 | 0 | 0 | 0  | 0 | 0 | 0 | 0 | 0 | 0  | 0 | 0 | 0 | 0 | 0 | 0 | 0 | 0 | 0  | 0 |
|         | 0                                                                                                                                                                                                                                                                                                                                                                                                                                                                                                                                                                                                                                                                                                                                                                                                               | 0 | 0 | 0 | 0 | 0  | 0 | 0 | 0 | 0 | 0  | 0 | 0 | 0 | 0 | 0 | 0  | 0 | 0 | 0 | 0 | 0 | 0 | 0 | 0 | 0  | 0 |
|         | 0                                                                                                                                                                                                                                                                                                                                                                                                                                                                                                                                                                                                                                                                                                                                                                                                               | 0 | 0 | 0 | 0 | 0  | 0 | 0 | 0 | 0 | 0  | 0 | 0 | 0 | 0 | 0 | 57 | 0 | 0 | 0 | 0 | 0 | 0 | 0 | 0 | 0  | 0 |
|         | 0                                                                                                                                                                                                                                                                                                                                                                                                                                                                                                                                                                                                                                                                                                                                                                                                               | 0 | 0 | 0 | 0 | 0  | 0 | 0 | 0 | 0 | 0  | 0 | 0 | 0 | 0 | 0 | 0  | 0 | 0 | 0 | 0 | 0 | 0 | 0 | 0 | 0  | 0 |
|         | M02255_77_000000000-ADUT3_1_2106_13885_17767 T---AC--GA-AG-GGG-----GCT-A-G-----C--G--T--T-GT-T-CGG-AA-----TT-A--C-T-GG-GC-----GT                                                                                                                                                                                                                                                                                                                                                                                                                                                                                                                                                                                                                                                                                |   |   |   |   |    |   |   |   |   |    |   |   |   |   |   |    |   |   |   |   |   |   |   |   |    |   |



Otu0485      0      0      0      0      0      0      0      0      0      0      0      0      0      0      0      0      0      0      0      0      0      0      0      0      0      0      0  
             0      0      0      0      0      97      0      0      0      0      0      0      0      0      0      0      0      0      0      0      0      0      0      0      0      0      0      0  
             0      0      0      0      0      0      0      0      0      0      0      0      0      0      0      0      17      0      0      0      0      0      0      0      0      0      0      0  
             0      0      0      0      0      0      0      0      0      0      0      0      0      0      0      0      0      0      0      0      0      0      0      0      0      0      0  
             M02255\_77\_000000000-ADUT3\_1\_1102\_7680\_5311    T---AC---GA-AG-GGG-----GCT-A-G-----C--G--T---T--GT-T-CGG-AA-----TT-A--C-T--GG-GC-----GT--A----AA-GC-GC-AC-----G-TA-G-G-C-G-----G--A-TT-G-T-T-----AA-  
---G-T-C-A-----G-G-G--G-TG--A-AA-TC--C-C-AG-A-G----CT-C-AA-----C-T-C-T-G-G-A--A-C---T-G--C-C---T--T-----T--GA-T-A--C-----T--G-G--CA-A-T-C---T-A-G-A-G-T--C---C-GG----AA-G-A-----G-G-T-T---AG-T-----GG--A--ATT---C-C-C-A-  
GT--GT-A-G-AG-GT--G---A--A-A---TT-C-GT-AG--AT-A-TT--G-G--G-A-A-G-A-AC-A-CC---AG--T--G--GC-GAA-G--G-C--G-----G--C-T-A-A---CTG--G--TC-C-G-----G-T---A-C-T--GA--CG-C-T-G--A-GG--T-G-CG-A--AA-G-C---G-TG--GG-G--AG-  
C-A-AA-----CA--GG    Bacteria(100);Proteobacteria(100);Alphaproteobacteria(100);Rhizobiales(100);unclassified(100);unclassified(100);unclassified(100);unclassified(100);unclassified(100);

Otu0486      0      0      0      0      0      0      0      0      0      0      0      0      0      0      0      0      0      0      0      0      0      0      0      0      0      0      0  
             0      0      0      0      0      0      0      0      0      0      0      0      0      0      0      0      0      0      0      0      0      0      0      0      0      0      0      0  
             0      0      0      0      181      0      0      0      0      0      0      0      0      0      0      0      0      0      0      0      0      0      0      0      0      0      0      0  
             0      0      0      0      0      0      0      0      0      0      0      0      0      0      0      0      0      0      0      0      0      0      0      0      0      0      0  
             M02255\_77\_000000000-ADUT3\_1\_2114\_16297\_10187    C---AA---AC-TC-CGT-----GCC-A-G-----C---A--G--CC-G-CGG-TA-----AT-A--C-G--GA-GG-----GT-----GC-GA-GC-GT-----TA-G-T-C-G-----G---AT-T-G-C-----  
---AA---G-C-A-T-----T-T-T-G-TG--A-AA-GA--A-C-AA-A-G----CT-T-AA-----C-T-T-T-G-T-A-G---A-G--C-A--A-A-----A-TG-G-A--C-----G-G-C-AT--C-A-C---T-A-G-A-G-T--C---T-CT----GA-G-A-----G-G-G-G--GG-T-----AG-A--ATT---T-C-  
A-A-GT--GT-A-A-CG-TT--G---A--A-A---TG-T-TT-AG--AT-A-TT--T-G--A-A-G-G-A-AT-A-CC---AG--T--G--GC-GAA-G--G-C--G-----G--C-C-C-C---CTG--G--CAGA-T-----G-T---A-C-T--GA--CG-C-T-C--A-GA--C-G-CG-A--AG-G-C---G-CG--GG-G--  
AG-C-A-AA-----CA--GG    Bacteria(100);unclassified(100);unclassified(100);unclassified(100);unclassified(100);unclassified(100);unclassified(100);unclassified(100);unclassified(100);

Otu0487      0      0      0      0      0      0      0      0      0      0      0      0      0      0      0      0      0      0      0      0      0      0      0      0      0      1      0      0  
             0      0      0      0      13      0      0      0      0      0      0      0      18      0      8      0      0      0      0      0      0      1      14      0      4      0      0      0  
             6      0      0      0      0      0      0      0      0      0      0      0      0      0      0      0      0      0      0      0      0      0      0      0      0      0      0      0  
             0      0      0      0      0      0      0      0      0      0      0      0      0      0      0      0      0      0      0      0      0      0      0      0      0      0      0      0  
             M02255\_77\_000000000-ADUT3\_1\_1102\_20083\_17199    T---AC---GT-AG-GGT-----GCA-A-G-----C--G--T---T--GT-C-CGG-AA-----TT-A--C-T--GG-GC-----GT--A----AA-GA-GC-TC-----G-TA-G-G-C-G-----G--T-TT-G-T-C-----  
----GC---G-T-C-G-----T-C-T--G--TG--A-AA-AC--C-A-GC-A-G----CT-C-AA-----C-T-G-T-T-G-G--C-T---T-G--C-A--G-G-----C--GA-T-A--C-----G-G-G--CA--G-A-C---T-T-G-A-G-T-A--T-TT----CA-G-G-----G-G-A-G--AC-T-----GG--A--ATT---C-  
C-T-G-GT--GT-A-G-CG-GT--G---A--A-A---TG-C-GC-AG--AT-A-TC--A-G--G-A-G-G-A-AC-A-CC---GG--T--G--GC-GAA-G--G-C--G-----G--G-T-C-T---CTG--T--GA-A-A-----T-A---A-C-T--GA--CG-C-T-G--A-GG--A-G-CG-A--AA-G-C---G-TG--GG-  
T--AG-C-G-AA-----CA--GG    Bacteria(100);Actinobacteria(100);Actinobacteria(100);Actinobacteridae(100);Actinomycetales(100);Corynebacterineae(100);Nocardiaceae(100);Rhodococcus(100);unclassified(100);

Otu0488      0      0      0      0      0      0      0      0      0      0      0      0      0      0      0      0      0      0      0      0      0      0      0      0      0      0      0      0  
             0      0      0      0      0      0      0      0      0      0      0      30      0      0      0      13      0      0      0      0      0      0      0      0      0      0      0      0  
             0      0      0      0      1      0      0      0      0      0      0      0      0      0      0      18      30      0      0      0      0      0      0      0      0      0      0      0      20  
             0      0      0      0      0      0      2      0      0      0      0      0      0      56      0      0      0      0      0      0      0      0      0      0      0      0      0      0  
             M02255\_76\_000000000-ADUNE\_1\_1107\_22969\_20776    A---AC---T-A--TGT-----GCC-A-G-----C--A--G---C--CG-C-GGT-AA-----AA-C--A-T--AG-GG-----GG--C---AA---GC-G-----T-TG-T-C-C-G-----G--T-AA-A-T-T-----  
-AA---G-T-C-A-----G-G-T--G--TG--A-AA-GT--T-C-GG-G-G----CT-C-AA-----C-C-C-C-G-T-G--A-T---T-G--C-A--C-C-----T--GA-T-A--C-----T--G-A--TA--A-A-C---T-A-G-A-G-T-G---T-TG----GA-G-A-----G-G-T-A--AG-T-----GG--A--ATT---C-C-T-  
A-GT--GT-A-G-CG-GT--G---G--A-A---TG-C-GT-AG--AT-A-TT--A-G--G-A-G-G-A-AC-A-CC---AG--T--G--GC-GAA-G--G-C--G-----A--C-T-T-A---CTG--G--TC-A-A-----T-A---A-C-T--GA--CG-C-T-G--A-GG--C-G-CG-A--AA-G-C---G-TG--GG-G--  
AG-C-A-AA-----CA--GG    Bacteria(100);Firmicutes(100);Clostridia(100);Clostridiales(100);Peptococcaceae(100);Peptococcus(100);unclassified(100);unclassified(100);unclassified(100);

Otu0489      0      0      0      0      0      2      0      0      0      0      0      0      0      0      0      0      0      0      0      0      0      0      0      0      0      0      0      0  
             0      0      0      0      0      0      0      0      1      1      0      0      0      0      0      0      0      0      0      0      0      0      0      0      0      0      0      0  
             0      0      3      0      0      0      0      0      0      0      0      0      0      0      0      22      0      0      0      0      0      0      0      0      0      0      0      0  
             0      3      0      0      0      0      0      0      0      3      0      0      0      0      0      0      0      0      0      0      3      0      0      0      3      0  
             M02255\_77\_000000000-ADUT3\_1\_2119\_22358\_24230    C---GG---CT-AA-CT-----ACG-T-G-----C--C--A---G--CA-G-CCG-CG-----GT-A--A-T--AC-GT-----AG--G----TC-CC-GA-GC-----G-TA-G-G-C-G-----G--T-TA-G-A-T-----  
----AA---G-T-C-T-----G-A-A--G--TT--A-AA-GG--C-T-GT-G-G----CT-T-AA-----C-C-A-T-A-G-T-A-----C-G--C-T---T--T-----G--GA-A-A--C-----T--G-T--TT--A-A-C---T-T-G-A-G-T-G---C-AA----GA-G-G-----G-G-A-G--AG-T-----GG--A--ATT---C-C-T-  
A-T-GT--GT-A-G-CG-GT--G---A--A-A---TG-C-GT-AG--AT-A-TA--T-G--G-A-G-G-A-AC-A-CC---GG--T--G--GC-GAA-A--G-C--G-----G--C-T-C-T---CTG--G--CT-T-G-----T-A---A-C-T--GA--CG-C-T-G--A-GG--C-T-CG-A--AA-G-C---G-TG--GG-G--  
AG-C-A-AA-----CA--GG    Bacteria(100);Firmicutes(100);Bacilli(100);Lactobacillales(100);Streptococcaceae(100);Streptococcus(100);unclassified(100);unclassified(100);unclassified(100);



|                                                                                                                                                                                                                                                                                                                                                                                                                                                                                                                                                                                                                                                                                                                                                                                                                                                 |   |     |    |    |   |   |    |    |    |   |   |   |   |    |   |   |   |   |   |   |   |   |    |    |   |   |   |
|-------------------------------------------------------------------------------------------------------------------------------------------------------------------------------------------------------------------------------------------------------------------------------------------------------------------------------------------------------------------------------------------------------------------------------------------------------------------------------------------------------------------------------------------------------------------------------------------------------------------------------------------------------------------------------------------------------------------------------------------------------------------------------------------------------------------------------------------------|---|-----|----|----|---|---|----|----|----|---|---|---|---|----|---|---|---|---|---|---|---|---|----|----|---|---|---|
| Otu0490                                                                                                                                                                                                                                                                                                                                                                                                                                                                                                                                                                                                                                                                                                                                                                                                                                         | 0 | 0   | 0  | 0  | 0 | 0 | 0  | 74 | 0  | 0 | 0 | 0 | 0 | 0  | 0 | 0 | 0 | 0 | 0 | 0 | 0 | 0 | 0  | 0  | 0 | 0 | 0 |
|                                                                                                                                                                                                                                                                                                                                                                                                                                                                                                                                                                                                                                                                                                                                                                                                                                                 | 0 | 0   | 0  | 0  | 0 | 0 | 0  | 0  | 0  | 0 | 0 | 0 | 0 | 0  | 0 | 0 | 0 | 0 | 0 | 0 | 0 | 0 | 0  | 0  | 0 | 0 |   |
|                                                                                                                                                                                                                                                                                                                                                                                                                                                                                                                                                                                                                                                                                                                                                                                                                                                 | 0 | 0   | 0  | 0  | 0 | 0 | 0  | 0  | 0  | 0 | 0 | 0 | 0 | 0  | 0 | 0 | 0 | 0 | 0 | 0 | 0 | 0 | 0  | 0  | 0 | 0 |   |
|                                                                                                                                                                                                                                                                                                                                                                                                                                                                                                                                                                                                                                                                                                                                                                                                                                                 | 0 | 0   | 0  | 0  | 0 | 0 | 0  | 0  | 0  | 0 | 0 | 0 | 0 | 0  | 0 | 0 | 0 | 0 | 0 | 0 | 0 | 0 | 0  | 12 | 0 | 0 |   |
| M02255_77_000000000-ADUT3_1_1117_7420_17403 T---AC---GT-AG-GGG-----GCA-A-G-----C--G--T---T--AT-C-CGG-AA-----TT-A--T-T--GG-GC-----GT--A----AA-GA-GT-GC-----G-TA-G-G-T-G-----G--T-TA-T-G-T-----AA-<br>---G-C-G-T-----G-A-G--G--TT--T-AA-GG--C-A-GT-G-G----CT-T-AA-----C-C-A-C-T-G-T--T-----C-G--C-C---T--T-----G--CG-A-A--C-----T--G-C--AT--A-A-C---T-T-G-A-G-T--G---C-AG----GA-G-G-----G-G-A-A--AG-C-----GG--A--ATT---C-C-T-A-<br>GT--GT-A-G-CG-GT--G---A--A-A---TG-C-GT-AG--AT-A-TT--A-G--G-A-G-G-A-AC-A-CC---AG--C--G--GC-GAA-G--G-C--G-----G--C-T-T-T---CTG--G--AC-T-G-----C-A---A-C-T--GA--CA-C-T-G--A-GG--C-A-CG-A--AA-G-C---G-TG--GG-G--AG-<br>C-A-AA-----CA--GG Bacteria(100);Firmicutes(100);Clostridia(100);Clostridiales(100);Family_XIII_Incertae_Sedis(100);unclassified(100);unclassified(100);unclassified(100);unclassified(100); |   |     |    |    |   |   |    |    |    |   |   |   |   |    |   |   |   |   |   |   |   |   |    |    |   |   |   |
| Otu0491                                                                                                                                                                                                                                                                                                                                                                                                                                                                                                                                                                                                                                                                                                                                                                                                                                         | 0 | 0   | 0  | 21 | 0 | 0 | 0  | 0  | 0  | 0 | 0 | 0 | 0 | 0  | 0 | 0 | 0 | 0 | 0 | 0 | 0 | 0 | 0  | 0  | 0 | 0 |   |
|                                                                                                                                                                                                                                                                                                                                                                                                                                                                                                                                                                                                                                                                                                                                                                                                                                                 | 0 | 0   | 0  | 0  | 0 | 0 | 0  | 0  | 0  | 0 | 0 | 0 | 9 | 0  | 0 | 0 | 0 | 0 | 0 | 0 | 0 | 0 | 0  | 0  | 0 | 0 |   |
|                                                                                                                                                                                                                                                                                                                                                                                                                                                                                                                                                                                                                                                                                                                                                                                                                                                 | 0 | 0   | 0  | 0  | 0 | 0 | 0  | 0  | 0  | 0 | 0 | 0 | 0 | 0  | 0 | 0 | 0 | 0 | 0 | 0 | 0 | 0 | 0  | 0  | 0 | 0 |   |
|                                                                                                                                                                                                                                                                                                                                                                                                                                                                                                                                                                                                                                                                                                                                                                                                                                                 | 0 | 0   | 0  | 0  | 0 | 0 | 0  | 0  | 0  | 0 | 0 | 0 | 0 | 0  | 0 | 0 | 0 | 0 | 0 | 0 | 0 | 0 | 0  | 0  | 0 | 0 |   |
| M02255_77_000000000-ADUT3_1_2114_18396_16354 T---AC---GT-AG-GGT-----CCG-A-G-----C--G--T---T--GT-C-CGG-AG-----TT-A--C-T--GG-GC-----GT--A----AA-GC-GC-GC-----G-CA-G-G-C-G-----G--T-CC-C-G-C-----<br>-----GC---G-C-C-C-----G-G-C--G--TG--A-AA-GC--C-C-CC-G-G----CT-C-AA-----C-C-G-G-G-G-A--G-G---G-T--C-G---T--C-----G--GG-G-A--C-----G--G-C--GG--G-A-C---T-T-G-A-G-G--G---C-GG----TA-G-G-----G-G-C-C---GG-T-----GG--A--ATC---<br>-C-C-T-G-GT--GT-A-G-TG-GT--G---A--A-A---TG-C-GT-AG--AG-A-TC--A-G--G-G-G-G-A-AC-A-CC---CG--T--G--GC-GAA-G--G-C--G-----G--C-C-G-G---CTG--G--GC-C-G-----A-C---C-C-T--GA--CG-C-T-G--A-GG--C-G-CG-A--AG-G-C---G-TG--<br>GG-G--AG-C-G-AA-----CG--GG Bacteria(100);Chloroflexi(100);Thermomicrobia(100);JG30-KF-CM45(100);unclassified(100);unclassified(100);unclassified(100);unclassified(100);unclassified(100);    |   |     |    |    |   |   |    |    |    |   |   |   |   |    |   |   |   |   |   |   |   |   |    |    |   |   |   |
| Otu0492                                                                                                                                                                                                                                                                                                                                                                                                                                                                                                                                                                                                                                                                                                                                                                                                                                         | 0 | 0   | 28 | 0  | 0 | 0 | 28 | 0  | 24 | 0 | 0 | 0 | 0 | 0  | 0 | 0 | 0 | 0 | 0 | 0 | 0 | 0 | 0  | 0  | 0 | 0 |   |
|                                                                                                                                                                                                                                                                                                                                                                                                                                                                                                                                                                                                                                                                                                                                                                                                                                                 | 0 | 0   | 0  | 0  | 0 | 0 | 0  | 0  | 0  | 0 | 0 | 0 | 0 | 0  | 0 | 0 | 0 | 0 | 0 | 0 | 0 | 0 | 0  | 0  | 0 | 0 |   |
|                                                                                                                                                                                                                                                                                                                                                                                                                                                                                                                                                                                                                                                                                                                                                                                                                                                 | 0 | 0   | 0  | 0  | 0 | 0 | 0  | 0  | 0  | 0 | 0 | 0 | 0 | 0  | 0 | 0 | 0 | 0 | 0 | 0 | 0 | 0 | 0  | 0  | 0 | 0 |   |
|                                                                                                                                                                                                                                                                                                                                                                                                                                                                                                                                                                                                                                                                                                                                                                                                                                                 | 0 | 0   | 0  | 0  | 0 | 0 | 0  | 0  | 0  | 0 | 0 | 0 | 0 | 0  | 0 | 0 | 0 | 0 | 0 | 0 | 0 | 0 | 0  | 0  | 0 | 0 |   |
| M02255_77_000000000-ADUT3_1_1102_8467_14181 T---AC---GT-AG-GGG-----GCA-A-G-----C--G--T---T--AT-C-CGG-AT-----TT-A--C-T--GG-GT-----GT--A----AA-GG-GA-GC-----G-TA-G-A-C-G-----G--C-AA-G-G-C-----<br>AA---G-T-C-T-----G-A-T--G--TG--A-AA-GG--C-T-GG-G-G----CT-C-AA-----C-C-C-C-G-G-G--A-C---T-G--C-A---T--T-----G--GA-A-A--C-----T--G-T--CC--T-G-C---T-G-G-A-G-T--G---C-CG----GA-G-A-----G-G-T-A--AG-C-----GG--A--ATT---C-C-T-<br>A-GT--GT-A-G-CG-GT--G---A--A-A---TG-C-GT-AG--AT-A-TT--A-G--G-A-G-G-A-AC-A-CC---AG--T--G--GC-GAA-G--G-C--G-----G--C-T-T-A---CTG--G--AC-G-G-----T-A---A-C-T--GA--CG-T-T-G--A-GG--C-T-CG-A--AA-G-C---G-TG--GG-G--<br>AG-C-A-AA-----CA--GG Bacteria(100);Firmicutes(100);Clostridia(100);Clostridiales(100);Lachnospiraceae(100);unclassified(100);unclassified(100);unclassified(100);unclassified(100);             |   |     |    |    |   |   |    |    |    |   |   |   |   |    |   |   |   |   |   |   |   |   |    |    |   |   |   |
| Otu0493                                                                                                                                                                                                                                                                                                                                                                                                                                                                                                                                                                                                                                                                                                                                                                                                                                         | 0 | 0   | 0  | 0  | 0 | 0 | 0  | 0  | 0  | 0 | 0 | 0 | 0 | 0  | 0 | 0 | 0 | 0 | 0 | 0 | 0 | 0 | 0  | 0  | 0 | 0 |   |
|                                                                                                                                                                                                                                                                                                                                                                                                                                                                                                                                                                                                                                                                                                                                                                                                                                                 | 0 | 186 | 0  | 0  | 0 | 0 | 0  | 0  | 0  | 0 | 0 | 0 | 0 | 91 | 0 | 0 | 0 | 0 | 0 | 0 | 0 | 0 | 0  | 0  | 0 | 0 |   |
|                                                                                                                                                                                                                                                                                                                                                                                                                                                                                                                                                                                                                                                                                                                                                                                                                                                 | 0 | 0   | 0  | 0  | 0 | 0 | 0  | 0  | 0  | 0 | 0 | 0 | 0 | 0  | 0 | 0 | 0 | 0 | 0 | 0 | 0 | 0 | 0  | 0  | 0 | 0 |   |
|                                                                                                                                                                                                                                                                                                                                                                                                                                                                                                                                                                                                                                                                                                                                                                                                                                                 | 0 | 0   | 0  | 0  | 0 | 0 | 0  | 0  | 0  | 0 | 0 | 0 | 0 | 0  | 0 | 0 | 0 | 0 | 0 | 0 | 0 | 0 | 0  | 0  | 0 | 0 |   |
| M02255_77_000000000-ADUT3_1_1102_20784_11021 T---AC---GT-AG-GTG-----GCG-A-G-----C--G--T---T--GT-C-CGG-AT-----TT-A--C-T--GG-GC-----GT--A----AA-GG-AT-GC-----G-TA-G-G-C-G-----G--A-TA-T-T-T-----<br>-----AA---G-T-G-G-----G-A-T--G--TG--A-AA-TA--C-C-CG-G-G----CT-T-AA-----C-C-T-G-G-G-T--G-C---T-G--C-A---T--T-----C--CA-A-A--C-----T--G-G--AT--A-T-C---T-A-G-A-G-T--G---C-AG----GA-G-A-----G-G-A-A--AG-C-----GG--A--ATT---C-<br>C-T-A-GT--GT-A-G-CG-GT--G---A--A-A---TG-C-GT-AG--AG-A-TT--A-G--G-A-A-G-A-AC-A-CC---AG--T--G--GC-GAA-G--G-C--G-----G--C-T-T-T---CTG--G--AC-T-G-----T-A---A-C-T--GA--CG-C-T-G--A-GG--C-A-TG-A--AA-G-C---G-TG--GG-G-<br>-AG-C-A-AA-----CA--GG Bacteria(100);Firmicutes(100);Clostridia(100);Clostridiales(100);Clostridiaceae(100);Clostridium(100);unclassified(100);unclassified(100);unclassified(100);         |   |     |    |    |   |   |    |    |    |   |   |   |   |    |   |   |   |   |   |   |   |   |    |    |   |   |   |
| Otu0494                                                                                                                                                                                                                                                                                                                                                                                                                                                                                                                                                                                                                                                                                                                                                                                                                                         | 0 | 0   | 0  | 0  | 0 | 0 | 0  | 0  | 0  | 0 | 0 | 0 | 0 | 0  | 0 | 0 | 0 | 0 | 0 | 0 | 0 | 0 | 0  | 0  | 0 | 0 |   |
|                                                                                                                                                                                                                                                                                                                                                                                                                                                                                                                                                                                                                                                                                                                                                                                                                                                 | 0 | 1   | 0  | 0  | 0 | 0 | 0  | 0  | 13 | 0 | 0 | 0 | 0 | 0  | 0 | 0 | 0 | 0 | 0 | 0 | 0 | 0 | 26 | 0  | 0 | 0 |   |
|                                                                                                                                                                                                                                                                                                                                                                                                                                                                                                                                                                                                                                                                                                                                                                                                                                                 | 0 | 0   | 0  | 0  | 0 | 0 | 0  | 0  | 0  | 0 | 0 | 0 | 0 | 0  | 0 | 0 | 0 | 0 | 0 | 0 | 0 | 0 | 0  | 0  | 0 | 0 |   |
|                                                                                                                                                                                                                                                                                                                                                                                                                                                                                                                                                                                                                                                                                                                                                                                                                                                 | 0 | 0   | 0  | 0  | 0 | 0 | 0  | 0  | 0  | 0 | 0 | 0 | 0 | 0  | 0 | 0 | 0 | 0 | 0 | 0 | 0 | 0 | 0  | 0  | 0 | 0 |   |
| M02255_77_000000000-ADUT3_1_1107_17108_13279 G---AC---AG-AG-GTG-----CCA-A-G-----C--G--T---T--AG-G-CGG-AA-----TC-A--C-T--GG-GC-----TT--A----AA-GC-GT-GT-----G-TA-G-G-C-G-----G--A-TT-G-G-T-----<br>-----AA---G-T-A-C-----C-T-T--G--TG--A-AA-TC--C-C-AC-A-G----CT-C-AA-----C-T-G-T-G-G-A--A-C---T-G--C-T---C--G-----G--TA-T-A--C-----T--G-C--TT--A-T-C---T-T-G-A-G-C--C---A-CT----TA-G-G-----G-G-C-T---GT-C-----GG--A--ACA---A-<br>A-C-G-GT--GG-A-G-CG-GT--G---A--A-A---TG-C-GT-AG--AT-A-TC--G-T--T-T-G-G-A-AC-G-CC---AA--A--G--GT-GAA-A--A-C-A-----G--A-C-A-G---CTG--G--GA-G-T-----G-T---G-C-T--GA--CG-C-T-G--A-GA--C-A-CG-A--AA-G-C---C-AG--GG-<br>G--AG-C-G-AA-----CG--GG Bacteria(100);Planctomycetes(100);Phycisphaerae(100);WD2101(100);unclassified(100);unclassified(100);unclassified(100);unclassified(100);unclassified(100);          |   |     |    |    |   |   |    |    |    |   |   |   |   |    |   |   |   |   |   |   |   |   |    |    |   |   |   |



|                                                                                                                                                                                                                   |   |   |    |    |   |   |    |   |     |    |     |   |   |   |    |    |    |     |   |   |     |   |   |     |   |   |  |
|-------------------------------------------------------------------------------------------------------------------------------------------------------------------------------------------------------------------|---|---|----|----|---|---|----|---|-----|----|-----|---|---|---|----|----|----|-----|---|---|-----|---|---|-----|---|---|--|
| Otu0495                                                                                                                                                                                                           | 1 | 1 | 56 | 0  | 0 | 0 | 82 | 4 | 268 | 0  | 0   | 0 | 0 | 0 | 0  | 0  | 0  | 0   | 0 | 0 | 0   | 0 | 0 | 0   | 0 | 0 |  |
|                                                                                                                                                                                                                   | 0 | 0 | 0  | 0  | 0 | 0 | 0  | 0 | 0   | 0  | 191 | 0 | 0 | 0 | 28 | 0  | 0  | 0   | 0 | 0 | 0   | 0 | 0 | 0   | 0 | 0 |  |
|                                                                                                                                                                                                                   | 0 | 0 | 0  | 0  | 0 | 0 | 0  | 0 | 1   | 0  | 0   | 0 | 0 | 0 | 0  | 0  | 21 | 0   | 0 | 0 | 0   | 0 | 0 | 0   | 0 | 0 |  |
|                                                                                                                                                                                                                   | 0 | 0 | 0  | 0  | 0 | 0 | 0  | 0 | 0   | 0  | 0   | 0 | 0 | 0 | 0  | 0  | 0  | 1   | 0 | 0 | 0   | 0 | 9 | 249 | 0 | 0 |  |
| M02255_77_000000000-ADUT3_1_1107_18303_16516 T---AC--GT-AT-GGA-----GCA-A-G----C-G-T--T--AT-C-CGG-AT-----TT-A-C-T-GG-GT-----GT-A----AA-GG-GA-GT-----G-TA-G-G-T-G-----G-T-AT-C-A-C-----                             |   |   |    |    |   |   |    |   |     |    |     |   |   |   |    |    |    |     |   |   |     |   |   |     |   |   |  |
| ----AA----G-T-C-A-----G-A-A--G--TG--A-AA-GC--C-C-GG-G-G----CT-C-AA-----C-C-C-C-G-G-G--A-C---T-G-C-T--T-T-----T-GA-A-A--C-----T-G-T-GG--A-A-C---T-G-G-A-G-T-G--C-AG----GA-G-A-----G-G-T-A--AG-T-----GG-A--ATT---C- |   |   |    |    |   |   |    |   |     |    |     |   |   |   |    |    |    |     |   |   |     |   |   |     |   |   |  |
| C-T-A-GT--GT-A-G-CG-GT--G---A-A-A---TG-C-GT-AG--AT-A-TT--A-G--G-A-G-G-A-AC-A-CC---AG-T-T-G-GC-GAA-G-G-C-G-----G-C-T-T-A---CTG-G--AC-T-G-----T-A--A-C-T-GA--CA-C-T-G--A-GG--C-T-CG-A--AA-G-C---G-TG--GG-G--        |   |   |    |    |   |   |    |   |     |    |     |   |   |   |    |    |    |     |   |   |     |   |   |     |   |   |  |
| -AG-C-A-AA-----CA--GG Bacteria(100);Firmicutes(100);Clostridia(100);Clostridiales(100);Lachnospiraceae(100);unclassified(100);unclassified(100);unclassified(100);unclassified(100);                              |   |   |    |    |   |   |    |   |     |    |     |   |   |   |    |    |    |     |   |   |     |   |   |     |   |   |  |
| Otu0496                                                                                                                                                                                                           | 0 | 0 | 0  | 0  | 0 | 0 | 0  | 0 | 0   | 0  | 0   | 0 | 0 | 0 | 0  | 0  | 0  | 0   | 0 | 0 | 0   | 1 | 0 | 0   | 0 | 0 |  |
|                                                                                                                                                                                                                   | 0 | 0 | 0  | 0  | 0 | 0 | 0  | 0 | 0   | 6  | 0   | 0 | 0 | 0 | 0  | 0  | 0  | 0   | 0 | 0 | 0   | 0 | 0 | 0   | 0 | 0 |  |
|                                                                                                                                                                                                                   | 0 | 0 | 0  | 11 | 0 | 0 | 0  | 0 | 0   | 0  | 0   | 0 | 0 | 7 | 0  | 0  | 0  | 0   | 0 | 0 | 0   | 0 | 0 | 0   | 0 | 0 |  |
|                                                                                                                                                                                                                   | 0 | 0 | 0  | 0  | 0 | 0 | 0  | 0 | 0   | 0  | 0   | 0 | 0 | 1 | 0  | 0  | 0  | 0   | 0 | 0 | 0   | 0 | 0 | 0   | 0 | 0 |  |
| M02255_77_000000000-ADUT3_1_1119_2714_12249 T---AC--GA-AG-GGG-----GCT-A-G----C-G-T--T--GT-T-CGG-AA-----TT-A-C-T-GG-GC-----GT-A----AA-GC-GC-GC-----G-TA-G-G-C-G-----G-T-GG-G-C-A-----                              |   |   |    |    |   |   |    |   |     |    |     |   |   |   |    |    |    |     |   |   |     |   |   |     |   |   |  |
| TA---G-T-C-A-----G-G-G--G--TG--A-AA-TC--C-C-GG-G-G----CT-C-AA-----C-C-T-C-G-G-A--A-T---T-G-C-C--T-T-----T-GA-T-A--C-----T-G-G--CA-C-G-C---T-T-G-A-A-T-C---C-GT----GA-G-A-----G-G-G-T--GG-T-----GG-A--ATG---G-C-C- |   |   |    |    |   |   |    |   |     |    |     |   |   |   |    |    |    |     |   |   |     |   |   |     |   |   |  |
| A-GT--GT-A-G-AG-GT--G---A-A-A---TT-C-GT-AG--AT-A-TT--G-G--C-C-G-G-A-AC-A-CC---AG-T-T-G-GC-GAA-G-G-C-G-----G-C-C-A-C---CTG-G--CG-C-G-----G-T--A-T-T-GA--CG-C-T-G--A-GG--C-G-CG-A--AA-G-C---G-TG--GG-G--            |   |   |    |    |   |   |    |   |     |    |     |   |   |   |    |    |    |     |   |   |     |   |   |     |   |   |  |
| AG-C-A-AA-----CA--GG Bacteria(100);Proteobacteria(100);Alphaproteobacteria(100);Rhodospirillales(100);Rhodospirillaceae(100);Caenispirillum(100);unclassified(100);unclassified(100);unclassified(100);           |   |   |    |    |   |   |    |   |     |    |     |   |   |   |    |    |    |     |   |   |     |   |   |     |   |   |  |
| Otu0497                                                                                                                                                                                                           | 0 | 0 | 0  | 0  | 0 | 0 | 0  | 0 | 0   | 0  | 0   | 0 | 0 | 0 | 0  | 0  | 0  | 0   | 0 | 0 | 0   | 0 | 0 | 0   | 0 | 0 |  |
|                                                                                                                                                                                                                   | 0 | 0 | 4  | 0  | 0 | 0 | 0  | 0 | 0   | 21 | 0   | 0 | 0 | 0 | 0  | 0  | 0  | 0   | 0 | 0 | 110 | 0 | 0 | 0   | 0 | 0 |  |
|                                                                                                                                                                                                                   | 0 | 0 | 0  | 0  | 0 | 0 | 0  | 0 | 0   | 0  | 0   | 0 | 0 | 0 | 0  | 0  | 0  | 0   | 0 | 0 | 0   | 0 | 0 | 0   | 0 | 0 |  |
|                                                                                                                                                                                                                   | 0 | 0 | 0  | 0  | 0 | 0 | 0  | 0 | 0   | 0  | 0   | 0 | 0 | 0 | 0  | 0  | 0  | 0   | 0 | 0 | 0   | 0 | 0 | 0   | 0 | 0 |  |
| M02255_76_000000000-ADUNE_1_2101_19631_14325 T---AC--GT-AG-GGG-----CCG-A-G----C-G-T--T--GT-C-CGG-AG-----TT-A-T-T-GG-GC-----GT-A----AA-GC-GC-GC-----G-CA-----G-T---C-----                                          |   |   |    |    |   |   |    |   |     |    |     |   |   |   |    |    |    |     |   |   |     |   |   |     |   |   |  |
| A---G-C-C-C-----G-A-C--G--TG--A-AA-GC--C-C-CC-G-G----CT-T-AA-----C-C-G-G-G-G-A--G-G---G-T-C-G--T-G-----G--GG-G-A--C-----G-G-C--AC--C-G-C---T-T-G-A-G-G-G---C-GG----GA-G-A-----G-G-T-C--GG-T-----GG-A--ATT---C-C-  |   |   |    |    |   |   |    |   |     |    |     |   |   |   |    |    |    |     |   |   |     |   |   |     |   |   |  |
| C-G-GT--GT-A-G-TG-GT--G---A-A-A---TG-C-GT-AG--AG-A-TC--G-G--G-A-G-G-A-AC-A-CC---TG--T-T-G-GC-GAA-G-G-C-G-----G-C-C-G-A---CTG-G--GC-C-G-----A-C---C-C-T-GA--CG-C-T-G--A-GG--C-G-CG-A--AG-G-C---G-TG--GG-G--        |   |   |    |    |   |   |    |   |     |    |     |   |   |   |    |    |    |     |   |   |     |   |   |     |   |   |  |
| -AG-C-G-AA-----CG--GG Bacteria(100);Chloroflexi(100);Thermomicrobia(100);JG30-KF-CM45(100);unclassified(100);unclassified(100);unclassified(100);unclassified(100);unclassified(100);                             |   |   |    |    |   |   |    |   |     |    |     |   |   |   |    |    |    |     |   |   |     |   |   |     |   |   |  |
| Otu0498                                                                                                                                                                                                           | 0 | 0 | 0  | 0  | 0 | 0 | 0  | 0 | 0   | 0  | 0   | 0 | 3 | 0 | 0  | 0  | 0  | 0   | 0 | 0 | 0   | 0 | 0 | 0   | 0 | 0 |  |
|                                                                                                                                                                                                                   | 0 | 0 | 0  | 0  | 0 | 0 | 0  | 0 | 0   | 4  | 0   | 0 | 0 | 0 | 0  | 29 | 0  | 303 | 0 | 0 | 0   | 0 | 0 | 0   | 0 | 0 |  |
|                                                                                                                                                                                                                   | 0 | 0 | 0  | 0  | 0 | 0 | 0  | 0 | 0   | 0  | 0   | 0 | 0 | 0 | 7  | 0  | 0  | 0   | 0 | 0 | 0   | 0 | 0 | 0   | 0 | 0 |  |
|                                                                                                                                                                                                                   | 0 | 0 | 0  | 0  | 0 | 0 | 0  | 0 | 0   | 0  | 0   | 0 | 0 | 0 | 0  | 0  | 0  | 0   | 0 | 0 | 0   | 0 | 0 | 0   | 0 | 0 |  |
| M02255_77_000000000-ADUT3_1_1108_25031_12624 T---AC--GG-AG-GAT-----CCG-A-G----C-G-T--T--AT-C-CGG-AT-----TT-A-T-T-GG-G-----TT-----GA                                                                               |   |   |    |    |   |   |    |   |     |    |     |   |   |   |    |    |    |     |   |   |     |   |   |     |   |   |  |



Otu0500 0 0 0 0 0 0 0 0 0 0 0 0 0 0 0 0 0 0 0 0 0 0 0 0 0 0 0 0 0 0  
0 0 0 0 0 0 0 0 0 0 0 0 0 0 0 0 0 0 0 0 0 0 0 28 0 0 0 0 0  
0 0 0 0 0 0 0 0 0 0 0 0 0 0 0 0 0 0 0 0 0 0 0 0 0 0 0 0 0 0  
0 0 0 0 0 0 0 0 0 0 0 0 0 0 0 0 0 0 0 0 0 0 0 0 0 0 0 0 0 0  
M02255\_77\_000000000-ADUT3\_1\_1105\_21363\_15295 T---AC---GT-AG-GAT-----GCA-A-G-----C-G-T---T-GT-C-CGG-AA-----TT-A-T-T-GG-GC-----GT-A-----AA-GA-GC-GC-----G-CA-G-G-C-G-----G-T-CG-A-T-C-----  
-----AA-----G-T-C-A-----G-A-T-G-TG-A-AA-TA-G-T-CC-G-G-----CT-T-AA-----C-C-G-G-A-A-G-G-----G-GT-C-A---T-T-----T-GA-A-A---C-----T-G-G--TC-G-A-C---T-A-G-A-G-T-A---C-AG-----CA-G-A-----G-G-A-T---AG-C-----GG-A-ATT-----  
C-C-C-G-GT--GT-A-G-TG-GT--G---A-A-A---TG-C-GT-AG--AT-A-TC--G-G--G-A-G-G-A-AC-A-CC---AG--T--G--GC-GAA-G--G-C-G-----G--C-T-A-T---CTG--G--GC-T-G-----A-A---A-C-T--GA--CG-C-T-G--A-GG--C-G-CG-A--AG-G-C---T-AG--  
GG-G--AG-C-A-AA-----CA--GG Bacteria(100);unclassified(100);unclassified(100);unclassified(100);unclassified(100);unclassified(100);unclassified(100);unclassified(100);unclassified(100);

Otu0501 0 0 0 0 0 0 0 0 0 0 0 0 0 0 0 0 0 0 0 0 0 0 0 0 0 0 0 0 0 0  
0 0 0 0 0 0 0 0 0 0 0 3 0 0 0 0 0 0 0 0 0 0 0 0 0 0 0 0 0 0  
0 0 0 0 0 6 0 0 0 0 0 0 0 0 0 0 0 0 0 59 0 0 0 0 0 0 0 0 0  
0 0 0 0 44 0 0 0 0 17 0 0 0 0 1 0 0 0 0 0 0 0 0 0 0 0 0 0 0  
M02255\_76\_000000000-ADUNE\_1\_1106\_23666\_12767 T---AC---GT-AG-GGA-----GCA-A-G-----C-G-T---T-GT-C-CGG-AA-----TC-A-C-T--GG-GC-----GT-A-----AA-GG-GT-TC-----G-CA-G-G-C-----AA-T-G-C-----  
---AA---G-T-C-T-----C-G-T--G-TG-A-AA-GG-C-A-AG-G-G-----CT-C-AA-----C-C-C-T-T-G-T-A-----A-G-C-A---C-A-----A-GA-A-A---C-----T-G-C--AT-A-G-C---T-T-G-A-G-T-A---G-TG-----GA-G-A-----G-G-C-A--AG-T-----GG-A-ATT-----C-C-  
T-A-GT--GT-A-G-CG-GT--G---A-A-A---TG-C-GT-AG--AT-A-TT-A-G--G-A-G-G-A-AT-A-CC---GG--T--G--GC-GAA-G--G-C-G-----A-C-T-T-G---CTG--G--AC-A-C-----A-A---A-C-T--GA--CG-C-T-G--A-GG--A-A-CG-A-AA-G-C---G-TG--GG-G--  
AG-C-A-AA-----CA--GG Bacteria(100);Firmicutes(100);Clostridia(100);Clostridiales(100);unclassified(100);unclassified(100);unclassified(100);unclassified(100);unclassified(100);

Otu0502 0 0 0 0 0 0 0 0 0 0 0 0 0 0 0 0 0 0 0 0 0 0 0 0 0 0 0 0 0 0  
0 0 0 0 0 0 0 0 0 0 0 0 0 0 0 0 0 0 0 0 0 0 0 0 0 0 0 0 0 0  
27 0 0 101 4 19 0 20 0 5 0 4 9 0 15 9 0 0 0 0 0 0 0 0 0 0 0 0 0  
0 0 0 0 0 0 0 0 0 0 0 0 0 0 0 0 0 0 0 0 0 0 0 0 0 0 0 0 0  
M02255\_77\_000000000-ADUT3\_1\_2110\_7383\_14236 T---AC---GG-AG-GAT-----GCA-A-G-----C-G-T---T-AT-C-CGG-AA-----TG-A-T-T-GG-GC-----GT-A-----AA-GC-GT-CC-----G-CA-G-G-T-G-----G-C-TT-T-G-C-----AA-  
---G-T-C-T-----G-C-T--G--TC-A-AA-GC-T-C-AG-G-G-----CT-T-AA-----C-C-C-T-G-A-A-T-C---G-G--C-G---G-T-----G-GA-A-A---C-----T-G-A-AA--A-G-C---T-A-G-A-G-T-G---C-GG-----TA-G-G-----G-G-T-A--GA-G-----GG-A-ATT-----C-C-C-A-  
GT--GT-A-G-CG-GT--G---A-A-A---TG-C-GT-AG--AG-A-TT-G-G--G-A-G-A-G-A-AC-G-CC---AG--T--G--GC-GAA-A--G-C-G-----C-T-C-T-G---CTA--G--AC-C-G-----C-A---A-C-T--GA--CA-C-T-C--A-TG--G-A-CG-A-AA-G-C---T-AG--GG-G--AG-  
C-G-AA-----TG--GG Bacteria(100);Cyanobacteria(100);unclassified(100);unclassified(100);unclassified(100);unclassified(100);unclassified(100);unclassified(100);unclassified(100);

Otu0503 0 0 0 0 0 0 0 0 0 0 0 0 0 0 0 0 0 0 0 0 0 0 0 0 0 0 0 0 0 0  
0 0 0 0 0 0 0 0 0 0 47 0 0 0 0 0 0 0 0 0 0 0 0 0 0 0 0 0 0  
0 0 0 0 0 0 0 0 0 0 0 0 0 0 0 0 0 0 0 0 0 0 0 0 0 0 0 0 0  
0 0 0 0 0 0 0 0 0 0 0 0 0 0 0 0 0 0 0 0 0 0 0 0 0 0 0 0 0  
M02255\_77\_000000000-ADUT3\_1\_1119\_23444\_24047 T---AC---GT-AG-GTG-----GCA-A-G-----C-G-T---T-GT-C-CGG-AT-----TT-A-T-T-GG-GC-----GT-A-----AA-GG-GC-GC-----G-CA-G-G-C-G-----G-T-CC-G-T-T-----  
-----AA-----G-T-C-T-----G-A-G--G--TG-A-AA-TC-T-C-CT-G-G-----CT-C-AA-----C-T-G-G-G-A-G--G-----G-GT-C-T---T-C-----A-GA-T-A---C-----T-G-G--CG--G-A-C---T-T-G-A-G-G--A---G-TG-----CA-G-A-----G-G-T-G---AG-T-----GG-A-ATT-----  
C-T-C-G-GT--GT-A-G-TG-GT--G---A-A-A---TG-C-GT-AG--AT-A-TC--G-A--G-A-G-G-A-AC-A-CC---AG--T--G--GC-GAA-G--G-C-G-----G--C-T-C-A---CTG--G--GC-A-C-----C-A---C-C-T--GA--CG-C-T-G--A-GG--C-G-CG-A-AA-G-C---G-TG--  
GG-G--AG-C-G-AA-----CC--GG Bacteria(100);unclassified(100);unclassified(100);unclassified(100);unclassified(100);unclassified(100);unclassified(100);unclassified(100);unclassified(100);

Otu0504 0 0 0 0 0 0 0 0 0 0 0 0 0 0 0 0 0 0 0 0 0 0 0 0 0 0 0 0 0 0  
0 0 0 0 0 0 0 0 0 0 0 0 0 0 0 0 0 0 0 0 0 0 0 0 0 0 0 0 0 0  
0 0 0 0 0 0 2 0 0 0 0 0 0 0 79 158 0 0 0 0 0 0 0 0 0 0 0 0 52 0  
0 0 0 0 0 0 0 0 0 0 0 0 0 0 0 0 0 0 0 0 0 0 0 0 0 0 0 0 0  
M02255\_77\_000000000-ADUT3\_1\_2119\_27577\_10255 T---AC---GT-AG-GGG-----GCA-A-G-----C-G-T---T-AT-C-CGG-AA-----TT-A-T-T-GG-GC-----GT-A-----AA-GA-GT-GC-----G-TA-G-G-T-G-----G-T-CT-A-C-T-----  
-----AA-----G-C-G-C-----G-A-G--G--TG-A-AA-GG-C-A-AT-G-G-----CT-C-AA-----C-C-A-T-T-G-T-T-----A-G--C-C---T-T-----G--CG-A-A---C-----T-G-G--CA--G-A-C---T-T-G-A-G-T-G---C-AA-----GA-G-A-----G-G-A-A--AG-C-----GG-A-ATT-----  
C-C-T-A-GT--GT-A-G-CG-GT--G---A-A-A---TG-C-GC-AG--AT-A-TT-A-G--G-A-G-G-A-AC-A-CC---GG--C--G--GC-GAA-G--G-C-G-----G--C-T-T-T---CTG--G--AT-T-G-----T-A---A-C-T--GA--CA-C-T-G--A-GG--C-A-CG-A-AA-G-C---G-TG--GG-  
T--AG-C-A-AA-----CA--GG Bacteria(100);Firmicutes(100);Clostridia(100);Clostridiales(100);Family\_XIII\_Incertae\_Sedis(100);unclassified(100);unclassified(100);unclassified(100);unclassified(100);



|                                              |                                                                                                                                                  |                                                                                                                                                                                                                      |                                                                                                                                                                                                           |                         |                                                                                                                                                                                          |    |    |    |    |    |    |    |    |     |    |    |   |    |   |     |     |   |   |   |   |    |
|----------------------------------------------|--------------------------------------------------------------------------------------------------------------------------------------------------|----------------------------------------------------------------------------------------------------------------------------------------------------------------------------------------------------------------------|-----------------------------------------------------------------------------------------------------------------------------------------------------------------------------------------------------------|-------------------------|------------------------------------------------------------------------------------------------------------------------------------------------------------------------------------------|----|----|----|----|----|----|----|----|-----|----|----|---|----|---|-----|-----|---|---|---|---|----|
| Otu0505                                      | 0                                                                                                                                                | 0                                                                                                                                                                                                                    | 0                                                                                                                                                                                                         | 0                       | 0                                                                                                                                                                                        | 0  | 0  | 0  | 0  | 0  | 0  | 0  | 0  | 0   | 0  | 0  | 0 | 0  | 0 | 0   | 0   | 0 | 0 | 0 | 0 | 0  |
|                                              | 0                                                                                                                                                | 0                                                                                                                                                                                                                    | 0                                                                                                                                                                                                         | 0                       | 0                                                                                                                                                                                        | 0  | 0  | 0  | 0  | 0  | 0  | 0  | 0  | 101 | 0  | 0  | 0 | 0  | 0 | 0   | 7   | 0 | 0 | 0 | 0 | 0  |
|                                              | 0                                                                                                                                                | 0                                                                                                                                                                                                                    | 0                                                                                                                                                                                                         | 0                       | 0                                                                                                                                                                                        | 0  | 0  | 0  | 0  | 0  | 0  | 0  | 0  | 28  | 89 | 0  | 0 | 0  | 0 | 0   | 0   | 0 | 0 | 0 | 0 | 38 |
|                                              | 0                                                                                                                                                | 0                                                                                                                                                                                                                    | 0                                                                                                                                                                                                         | 0                       | 0                                                                                                                                                                                        | 0  | 0  | 0  | 0  | 0  | 0  | 0  | 0  | 0   | 0  | 0  | 0 | 0  | 0 | 0   | 0   | 0 | 0 | 0 | 0 |    |
| M02255_77_000000000-ADUT3_1_1114_5334_14061  | T---AC--GT-AG-GGG-----GCA-A-G-----C-G-T--T--AT-C-CGG-AT-----TT-A-C-T--GG-GT-----GT-A----AA-GG-GA-GC-----G-TA-G-A-C-G-----G-C-GA-T-G-T-----       | AA---G-T-C-T-----G-A-A--G--TG--A-AA-GC--C-C-AC-G-G----CT-C-AA-----C-T-G-T-G-G-G--A-C---T-G--C-T--T-T-----G--GA-A-A--C-----T-A-T--GT--A-G-C---T-A-G-A-G-T-A--T-CG----GA-G-G-----G-G-C-A--AG-C-----GG-A--ATT---C-C-T-  | A-GT--GT-A-G-CG-GT--G---A-A-A---TG-C-GT-AG--AT-A-TT--A-G--G-A-G-G-A-AC-A-CC--GG--A-G--GC-GAA-G--G-C-G-----G-C-T-T-G--CTG--G--AC-G-A-----A-G--A-C-T--GA--CG-T-T-G--A-GG--C-T-CG-A--AG-G-C---G-TG--GG-G--   | AG-C-A-AA-----CA--GG    | Bacteria(100);Firmicutes(100);Clostridia(100);Clostridiales(100);Lachnospiraceae(100);unclassified(100);unclassified(100);unclassified(100);unclassified(100);                           |    |    |    |    |    |    |    |    |     |    |    |   |    |   |     |     |   |   |   |   |    |
| Otu0506                                      | 0                                                                                                                                                | 0                                                                                                                                                                                                                    | 0                                                                                                                                                                                                         | 0                       | 0                                                                                                                                                                                        | 0  | 1  | 0  | 0  | 0  | 0  | 0  | 1  | 0   | 0  | 0  | 0 | 0  | 0 | 0   | 0   | 0 | 0 | 0 | 0 | 0  |
|                                              | 2                                                                                                                                                | 0                                                                                                                                                                                                                    | 0                                                                                                                                                                                                         | 0                       | 0                                                                                                                                                                                        | 0  | 0  | 0  | 0  | 0  | 0  | 0  | 0  | 0   | 0  | 0  | 0 | 0  | 0 | 0   | 0   | 0 | 0 | 0 | 0 | 0  |
|                                              | 0                                                                                                                                                | 0                                                                                                                                                                                                                    | 0                                                                                                                                                                                                         | 0                       | 0                                                                                                                                                                                        | 0  | 0  | 0  | 0  | 0  | 0  | 0  | 0  | 11  | 11 | 0  | 0 | 0  | 0 | 0   | 0   | 0 | 0 | 0 | 0 | 4  |
|                                              | 25                                                                                                                                               | 0                                                                                                                                                                                                                    | 0                                                                                                                                                                                                         | 0                       | 0                                                                                                                                                                                        | 0  | 0  | 0  | 0  | 0  | 0  | 0  | 0  | 0   | 0  | 0  | 0 | 0  | 0 | 0   | 0   | 0 | 0 | 0 | 0 | 0  |
| M02255_77_000000000-ADUT3_1_1112_6135_9646   | T---AC--GT-AG-GGT-----GCG-A-G-----C-G-T--T--GT-C-CGG-AT-----TT-A-T-T--GG-GC-----GT-A----AA-GA-GC-TT-----G-TA-G-G-C-G-----G-T-TT-G-T-C-----GC--   | --G-T-C-G-----G-G-A--G--TG--A-AA-AC--T-T-GG-G-G----CT-T-AA-----C-C-C-T-G-A-G--C-T---T-G--C-T--T-T-----C--GA-T-A--C-----G--G-G--CT--G-A-C---T-T-G-A-G-G--G--A-GG---TA-G-G-----G-G-A-G--AA-T-----GG--A--ATT---C-C-T-G- | GT--GG-A-G-CG-GT--G---G-A-A---TG-C-GC-AG--AT-A-TC--A-G--G-A-G-G-A-AC-A-CC--GG--T-G--GC-GAA-G--G-C-G-----G-T-T-C-T--CTG--G--AC-C-T-----T-T--C-C-T--GA--CG-C-T-G--A-GA--A-G-CG-A--AA-G-C---G-TG--GG-G--AG-  | C-G-AA-----CA--GG       | Bacteria(100);Actinobacteria(100);Actinobacteria(100);Actinobacteridae(100);Actinomycetales(100);Propionibacterineae(100);Propionibacteriaceae(100);unclassified(100);unclassified(100); |    |    |    |    |    |    |    |    |     |    |    |   |    |   |     |     |   |   |   |   |    |
| Otu0507                                      | 0                                                                                                                                                | 0                                                                                                                                                                                                                    | 0                                                                                                                                                                                                         | 0                       | 0                                                                                                                                                                                        | 0  | 0  | 0  | 0  | 0  | 0  | 0  | 0  | 0   | 0  | 0  | 0 | 0  | 0 | 0   | 0   | 0 | 0 | 0 | 0 | 0  |
|                                              | 0                                                                                                                                                | 0                                                                                                                                                                                                                    | 0                                                                                                                                                                                                         | 0                       | 0                                                                                                                                                                                        | 0  | 0  | 0  | 0  | 0  | 0  | 0  | 0  | 0   | 0  | 0  | 0 | 0  | 0 | 0   | 0   | 0 | 0 | 0 | 0 | 0  |
|                                              | 221                                                                                                                                              | 0                                                                                                                                                                                                                    | 31                                                                                                                                                                                                        | 0                       | 41                                                                                                                                                                                       | 19 | 89 | 32 | 16 | 28 | 65 | 10 | 13 | 21  | 21 | 7  | 6 | 0  | 0 | 308 | 201 | 0 | 0 | 0 | 0 | 35 |
|                                              | 0                                                                                                                                                | 0                                                                                                                                                                                                                    | 0                                                                                                                                                                                                         | 0                       | 0                                                                                                                                                                                        | 0  | 0  | 0  | 0  | 0  | 0  | 0  | 0  | 0   | 13 | 84 | 0 | 18 | 0 | 0   | 0   | 0 | 0 | 0 | 0 | 0  |
| M02255_77_000000000-ADUT3_1_1105_22193_11153 | G---AC--GT-AG-GAT-----GCA-A-G-----C-G-T--T--GT-C-CGG-AA-----TT-A--T-T--GG-GC-----GT-A----AA-GA-GT-TC-----G-TA-G-G-T-G-----G--T-TT-G-T-T-----AA-- | ---AA---G-T-T-T-----G-G-T--G--TT--A-AA-GA--T-T-GG-G-G----CT-C-AA-----C-C-C-T-G-A-A--A-C---T-G--C-A--C--T-----G--AA-T-A--C-----T--G-G--CA--G-A-C---T-C-G-A-G-T-G--T-GG---TA-G-A-----G-G-C-T--AG-T-----GG--A--ATT---C- | C-C-A-GT--GT-A-G-CG-GT--G---A-A-A---TG-C-GT-AG--AT-A-TT--G-G--G-A-A-G-A-AC-A-CC--GG--T-G--GC-GTA-G--G-C-G-----A--C-T-A-G--CTG--G--GC-C-A-----T-A--A-C-T--GA--CA-C-T-G--A-GG--A-A-CG-A--AA-G-C---C-AG--GG- | G--AG-C-G-AA-----TG--GG | Bacteria(100);Cyanobacteria(100);MLE1-12(100);unclassified(100);unclassified(100);unclassified(100);unclassified(100);unclassified(100);unclassified(100);                               |    |    |    |    |    |    |    |    |     |    |    |   |    |   |     |     |   |   |   |   |    |
| Otu0508                                      | 0                                                                                                                                                | 0                                                                                                                                                                                                                    | 0                                                                                                                                                                                                         | 0                       | 0                                                                                                                                                                                        | 0  | 0  | 0  | 0  | 0  | 0  | 0  | 0  | 0   | 0  | 0  | 0 | 0  | 0 | 0   | 0   | 0 | 0 | 0 | 0 | 0  |
|                                              | 0                                                                                                                                                | 0                                                                                                                                                                                                                    | 0                                                                                                                                                                                                         | 0                       | 0                                                                                                                                                                                        | 0  | 0  | 0  | 0  | 0  | 0  | 0  | 0  | 0   | 0  | 0  | 0 | 0  | 0 | 0   | 0   | 0 | 0 | 0 | 0 | 0  |
|                                              | 0                                                                                                                                                | 0                                                                                                                                                                                                                    | 0                                                                                                                                                                                                         | 0                       | 9                                                                                                                                                                                        | 0  | 0  | 4  | 0  | 0  | 0  | 0  | 0  | 0   | 0  | 0  | 0 | 0  | 0 | 0   | 0   | 0 | 0 | 0 | 0 | 0  |
|                                              | 0                                                                                                                                                | 0                                                                                                                                                                                                                    | 0                                                                                                                                                                                                         | 0                       | 0                                                                                                                                                                                        | 0  | 0  | 0  | 0  | 0  | 0  | 0  | 0  | 0   | 0  | 0  | 0 | 0  | 0 | 0   | 0   | 0 | 0 | 0 | 0 | 0  |
| M02255_77_000000000-ADUT3_1_1108_6665_16169  | T---AC--GT-AG-GTG-----GCG-A-G-----C-G-T--T--GT-C-CGG-AA-----TT-A--T-T--GG-GC-----GT-A----AA-GG-GT-GC-----G-TA-G-G-C-G-----G--T-TT-T-T-T-----AA-- | --G-T-G-G-----G-A-T--G--                                                                                                                                                                                             |                                                                                                                                                                                                           |                         |                                                                                                                                                                                          |    |    |    |    |    |    |    |    |     |    |    |   |    |   |     |     |   |   |   |   |    |



|                                                                                                                                                                                                                                                                                                                                                                                                                                                                                                                                                                                                                                                                                                                                                                                                                                                            |   |   |    |   |   |    |    |    |   |    |   |   |   |    |   |   |   |   |   |     |   |   |   |   |   |    |     |
|------------------------------------------------------------------------------------------------------------------------------------------------------------------------------------------------------------------------------------------------------------------------------------------------------------------------------------------------------------------------------------------------------------------------------------------------------------------------------------------------------------------------------------------------------------------------------------------------------------------------------------------------------------------------------------------------------------------------------------------------------------------------------------------------------------------------------------------------------------|---|---|----|---|---|----|----|----|---|----|---|---|---|----|---|---|---|---|---|-----|---|---|---|---|---|----|-----|
| Otu0510                                                                                                                                                                                                                                                                                                                                                                                                                                                                                                                                                                                                                                                                                                                                                                                                                                                    | 0 | 0 | 0  | 0 | 0 | 0  | 0  | 0  | 0 | 0  | 0 | 0 | 0 | 0  | 0 | 0 | 0 | 0 | 0 | 0   | 0 | 0 | 0 | 0 | 0 | 0  | 0   |
|                                                                                                                                                                                                                                                                                                                                                                                                                                                                                                                                                                                                                                                                                                                                                                                                                                                            | 0 | 0 | 0  | 0 | 0 | 0  | 0  | 0  | 0 | 0  | 0 | 0 | 0 | 18 | 0 | 0 | 0 | 0 | 0 | 0   | 0 | 0 | 0 | 0 | 0 | 0  | 0   |
|                                                                                                                                                                                                                                                                                                                                                                                                                                                                                                                                                                                                                                                                                                                                                                                                                                                            | 0 | 0 | 0  | 0 | 0 | 0  | 0  | 4  | 0 | 0  | 0 | 0 | 0 | 0  | 0 | 0 | 0 | 0 | 0 | 0   | 0 | 0 | 0 | 0 | 0 | 0  | 0   |
|                                                                                                                                                                                                                                                                                                                                                                                                                                                                                                                                                                                                                                                                                                                                                                                                                                                            | 0 | 0 | 0  | 0 | 0 | 0  | 0  | 0  | 0 | 0  | 0 | 0 | 0 | 0  | 0 | 0 | 0 | 0 | 0 | 0   | 0 | 0 | 0 | 0 | 0 | 0  | 0   |
| M02255_77_000000000-ADUT3_1_2114_9484_17319 G---AC---GT-AG-GGT-----CCA-A-G-----C--G--T---T--GT-C-CGG-AT-----TT-A--C-T--GG-GC-----GT--A----AA-GA-GC-GC-----G-TA-G-G-C-G-----G--C-TC-G-T-T-----AA-<br>---G-T-G-T-----G-A-A--G--TG--A-AA-TC--C-C-CA-GGG-----CT-C-AA-----C-C-C-G-G-A-A--A-C---T-G--C-T---T--T-----A-CA-T-A--C-----T--G-G--CG--A-G-C---T-G-G-A-G-T--G---A-TG----AA-G-A-----G-G-T-T---TG-T-----GG--A--ATT---C-C-T-G-<br>GT--GT-A-G-CG-GT--G---A--A-A---TG-C-GT-TG--AT-A-TC--A-G--G-A-G-G-A-AC-A-CC---CA--T--G--GC-GAA-G--G-C--A-----G--C-A-A-A---CTG--G--TC-A-T-----C-A--A-C-T--GA--CG-C-T-G--A-GG--C-G-CG-A-AA-G-C---G-TG--GG-T--AG-C-<br>A-AA-----CA--GG Bacteria(100);unclassified(100);unclassified(100);unclassified(100);unclassified(100);unclassified(100);unclassified(100);unclassified(100);unclassified(100);                        |   |   |    |   |   |    |    |    |   |    |   |   |   |    |   |   |   |   |   |     |   |   |   |   |   |    |     |
| Otu0511                                                                                                                                                                                                                                                                                                                                                                                                                                                                                                                                                                                                                                                                                                                                                                                                                                                    | 0 | 0 | 0  | 0 | 0 | 0  | 0  | 0  | 0 | 0  | 0 | 0 | 0 | 0  | 0 | 0 | 0 | 0 | 0 | 0   | 0 | 0 | 0 | 0 | 0 | 0  | 0   |
|                                                                                                                                                                                                                                                                                                                                                                                                                                                                                                                                                                                                                                                                                                                                                                                                                                                            | 0 | 0 | 0  | 0 | 0 | 0  | 0  | 0  | 0 | 0  | 0 | 0 | 0 | 0  | 0 | 0 | 0 | 0 | 0 | 0   | 0 | 0 | 0 | 0 | 0 | 17 | 0   |
|                                                                                                                                                                                                                                                                                                                                                                                                                                                                                                                                                                                                                                                                                                                                                                                                                                                            | 0 | 0 | 0  | 0 | 0 | 0  | 0  | 16 | 0 | 0  | 0 | 0 | 0 | 0  | 0 | 0 | 0 | 0 | 0 | 0   | 0 | 0 | 0 | 0 | 0 | 0  | 0   |
|                                                                                                                                                                                                                                                                                                                                                                                                                                                                                                                                                                                                                                                                                                                                                                                                                                                            | 0 | 0 | 0  | 0 | 0 | 1  | 0  | 0  | 0 | 0  | 0 | 0 | 0 | 0  | 0 | 0 | 0 | 0 | 0 | 0   | 0 | 0 | 0 | 0 | 0 | 0  | 0   |
| M02255_76_000000000-ADUNE_1_2119_21695_14039 TC---GC---AG-AA-GAA-----GCA-C-C-----G--G--C---T--AA---C-T-CC-----GT-G--C-C--AG-CA-----GC--C-----GC-G--GT-AA-----TAC--G-G-A-G-----G--T-TG-G-A-A-----<br>----AA---G-T-T-A-----G-A-T--G--TG--A-AA-GC--C-C-CG-G-G-----CT-C-AA-----C-C-T-G-G-G-A--A-T---T-G--C-A---T--T-----T--AA-A-A---C-----T--G-T--CC--A-G-C---T-A-G-A-G-T--C---T-TG----TA-G-A-----G-G-G-G---GG-T-----AG--A--ATT---C-<br>C-A-G-GT--GT-A-G-CG-GT--G---A--A-A---TG-C-GT-AG--AG-A-TC--T-G--G-A-G-G-A-AT-A-CC---GG--T--G--GC-GAA-G--G-C--G-----G--C-C-C-C---CTG--G--AC-A-A-----A-G---A-C-T--GA--CG-C-T-C--A-GG--T-G-CG-A-AA-G-C---G-TG--GG-<br>G--AG-C-A-AA-----CA--GG Bacteria(100);Proteobacteria(100);Gammaproteobacteria(100);unclassified(100);unclassified(100);unclassified(100);unclassified(100);unclassified(100);unclassified(100);      |   |   |    |   |   |    |    |    |   |    |   |   |   |    |   |   |   |   |   |     |   |   |   |   |   |    |     |
| Otu0512                                                                                                                                                                                                                                                                                                                                                                                                                                                                                                                                                                                                                                                                                                                                                                                                                                                    | 0 | 0 | 0  | 0 | 0 | 0  | 0  | 0  | 0 | 0  | 0 | 0 | 0 | 0  | 0 | 0 | 0 | 0 | 0 | 0   | 0 | 0 | 0 | 0 | 0 | 0  | 0   |
|                                                                                                                                                                                                                                                                                                                                                                                                                                                                                                                                                                                                                                                                                                                                                                                                                                                            | 0 | 0 | 0  | 0 | 0 | 0  | 68 | 0  | 0 | 55 | 0 | 0 | 0 | 0  | 0 | 0 | 0 | 0 | 0 | 0   | 0 | 0 | 0 | 0 | 0 | 0  | 0   |
|                                                                                                                                                                                                                                                                                                                                                                                                                                                                                                                                                                                                                                                                                                                                                                                                                                                            | 0 | 0 | 0  | 0 | 0 | 0  | 0  | 0  | 0 | 0  | 0 | 0 | 0 | 0  | 0 | 0 | 0 | 0 | 0 | 0   | 0 | 0 | 0 | 0 | 0 | 0  | 0   |
|                                                                                                                                                                                                                                                                                                                                                                                                                                                                                                                                                                                                                                                                                                                                                                                                                                                            | 0 | 0 | 0  | 0 | 0 | 0  | 0  | 0  | 0 | 0  | 0 | 0 | 0 | 0  | 0 | 0 | 0 | 0 | 0 | 0   | 0 | 0 | 0 | 0 | 0 | 0  | 0   |
| M02255_77_000000000-ADUT3_1_1102_9784_15449 T---AC---GG-AG-GGG-----GCT-A-G-----C--G--T---T--GT-T-CGG-AA-----TT-A--C-T--GG-GC-----GT--A----AA-GC-GG-GT-----G-TA-G-G-C-G-----G--A-TC-T-C-T-----AA-<br>---G-T-C-G-----G-G-G--G--TG--A-AA-GC--C-C-TG-G-G-----CT-C-AA-----C-C-C-A-G-G-A--A-C---T-G--C-C---T--T-----C--GA-T-A--C-----T--G-G--AG--A-T-C---T-C-G-A-G-T--C---T-GG----GA-G-A-----G-G-T-G---AG-C-----GG--A--ATT---C-C-G-A-<br>GT--GT-A-G-AG-GT--G---A--A-A---TT-C-GT-AG--AT-A-TT--C-G--G-A-G-G-A-AC-A-CC---AG--A--G--GC-GAA-G--G-C--G-----G--C-T-C-A---CTG--G--AC-C-A-----G-T---A-C-T--GA--CG-C-T-G--A-GA--C-C-CG-A-AA-G-C---G-TG--GG-G--AG-<br>C-A-AA-----CA--GG Bacteria(100);Proteobacteria(100);unclassified(100);unclassified(100);unclassified(100);unclassified(100);unclassified(100);unclassified(100);unclassified(100);                    |   |   |    |   |   |    |    |    |   |    |   |   |   |    |   |   |   |   |   |     |   |   |   |   |   |    |     |
| Otu0513                                                                                                                                                                                                                                                                                                                                                                                                                                                                                                                                                                                                                                                                                                                                                                                                                                                    | 0 | 0 | 19 | 0 | 0 | 0  | 43 | 3  | 0 | 0  | 0 | 0 | 0 | 0  | 0 | 0 | 0 | 0 | 0 | 0   | 0 | 0 | 0 | 0 | 0 | 0  | 0   |
|                                                                                                                                                                                                                                                                                                                                                                                                                                                                                                                                                                                                                                                                                                                                                                                                                                                            | 0 | 0 | 0  | 0 | 0 | 0  | 0  | 0  | 0 | 0  | 0 | 0 | 0 | 0  | 0 | 0 | 0 | 0 | 0 | 0   | 0 | 0 | 0 | 0 | 0 | 0  | 0   |
|                                                                                                                                                                                                                                                                                                                                                                                                                                                                                                                                                                                                                                                                                                                                                                                                                                                            | 0 | 0 | 0  | 0 | 0 | 0  | 0  | 0  | 0 | 0  | 0 | 0 | 0 | 0  | 0 | 0 | 0 | 0 | 0 | 0   | 0 | 0 | 0 | 0 | 0 | 0  | 0   |
|                                                                                                                                                                                                                                                                                                                                                                                                                                                                                                                                                                                                                                                                                                                                                                                                                                                            | 0 | 0 | 0  | 0 | 0 | 21 | 0  | 0  | 0 | 0  | 0 | 0 | 0 | 0  | 0 | 0 | 0 | 0 | 0 | 40  | 0 | 0 | 0 | 0 | 0 | 54 | 0   |
| M02255_77_000000000-ADUT3_1_1116_27511_16037 T---AC---GT-AG-GAT-----CCG-A-G-----C--A--T---T--AT-C-CGG-AG-----TG-A--C-T--GG-GT-----GT--A----AA-GA-GTTGC-----G-TA-G-G-T-G-----G--C-AA-G-G-T---<br>-----AA---G-T-A-G-----A-T-A--G--TG--A-AA-TC--T--GGT-G-G-----CT-C-AA-----C-C-A-T-TCA-G--A-C---T-A--T-T---A--T-----C--TA-A-A---C-----T--A-T--CT--A-G-C---T-C-G-A-G-A--C---T-GT----TA-T-G-----G-G-T-A---AC-T-----GG--A--ATT---T-<br>C-T-A-GT--GT-A-G-GA-GT--G---A--A-A---TC-C-GT-AG--AT-A-TT--A-G--A-A-G-GA--AC-A-CC---GA--T--A--GC-GTA-G--G-C--A-----G--G-T-T-A---CTG--G--GA-C-A-----G-T---T-C-T--GA--CA-C-T-A--A-GG--C-A-CG-A-AA-G-C---G-TA--GG-G-<br>-AG-C-A-AA-----CG--GG Bacteria(100);Candidate_division_TM7(100);unclassified(100);unclassified(100);unclassified(100);unclassified(100);unclassified(100);unclassified(100);unclassified(100);        |   |   |    |   |   |    |    |    |   |    |   |   |   |    |   |   |   |   |   |     |   |   |   |   |   |    |     |
| Otu0514                                                                                                                                                                                                                                                                                                                                                                                                                                                                                                                                                                                                                                                                                                                                                                                                                                                    | 0 | 0 | 0  | 0 | 0 | 0  | 0  | 0  | 0 | 0  | 0 | 0 | 0 | 0  | 0 | 0 | 0 | 0 | 0 | 0   | 0 | 0 | 0 | 0 | 0 | 0  | 0   |
|                                                                                                                                                                                                                                                                                                                                                                                                                                                                                                                                                                                                                                                                                                                                                                                                                                                            | 0 | 0 | 0  | 0 | 0 | 0  | 0  | 0  | 0 | 0  | 0 | 0 | 0 | 0  | 0 | 0 | 0 | 0 | 0 | 110 | 0 | 0 | 0 | 0 | 0 | 0  | 119 |
|                                                                                                                                                                                                                                                                                                                                                                                                                                                                                                                                                                                                                                                                                                                                                                                                                                                            | 0 | 0 | 0  | 0 | 0 | 0  | 0  | 0  | 0 | 0  | 0 | 0 | 0 | 0  | 0 | 0 | 0 | 0 | 0 | 0   | 0 | 0 | 0 | 0 | 0 | 0  | 0   |
|                                                                                                                                                                                                                                                                                                                                                                                                                                                                                                                                                                                                                                                                                                                                                                                                                                                            | 0 | 0 | 0  | 0 | 0 | 30 | 0  | 0  | 0 | 0  | 0 | 3 | 0 | 0  | 0 | 0 | 0 | 0 | 0 | 0   | 0 | 0 | 0 | 0 | 0 | 0  | 0   |
| M02255_77_000000000-ADUT3_1_1108_25182_17694 T---AC---GG-AG-GGG-----GCT-A-G-----C--G--T---T--GT-T-CGG-AA-----TT-A--C-T--GG-GC-----GT--A----AA-GC-GC-AC-----G-TA-G-G-C-G-----G--A-TA-G-T-T-----<br>-----AA---G-T-C-G-----G-G-G--G--TG--A-AA-TC--C-C-GG-G-G-----CT-C-AA-----C-C-C-C-G-G-A--A-C---T-G--C-C---T--T-----C--GA-T-A--C-----T--G-G--CT--G-T-C---T-A-G-A-G-A--T---C-GA----GA-G-A-----G-G-T-G---AG-T-----GG--A--ATT---<br>C-C-G-A-GT--GT-A-G-AG-GT--G---A--A-A---TT-C-GT-AG--AT-A-TT--C-G--G-A-G-G-A-AC-A-CC---AG--T--G--GC-GAA-G--G-C--G-----G--C-T-C-A---CTG--G--CT-C-G-----A-T---A-C-T--GA--CG-C-T-G--A-GG--T-G-CG-A-AA-G-C---G-TG--GG-<br>G--AG-C-A-AA-----CA--GG Bacteria(100);Proteobacteria(100);Alphaproteobacteria(100);Rhodobacterales(100);Rhodobacteraceae(100);unclassified(100);unclassified(100);unclassified(100);unclassified(100); |   |   |    |   |   |    |    |    |   |    |   |   |   |    |   |   |   |   |   |     |   |   |   |   |   |    |     |



Otu0515 0 0 0 0 0 0 0 0 0 0 0 0 0 0 0 0 0 0 0 0 0 0 0 0 0 0 0 0  
0 0 0 0 0 0 0 0 0 0 0 0 0 0 0 0 12 0 0 0 0 0 0 0 7 0 0 0  
0 0 0 0 0 0 0 0 0 0 0 0 0 0 0 0 0 0 0 0 0 0 0 0 0 0 0 0  
0 0 0 0 0 0 0 0 0 0 0 0 0 0 0 0 0 0 0 0 0 0 0 0 0 0  
M02255\_77\_000000000-ADUT3\_1\_1111\_4340\_13965 T---AC---GG-AG-GGG-----GCT-A-G-----C--G--T---T-GT-T-CGG-AA-----TT-A--C-T--GG-GC-----GT--A----AA-GC-GC-AC-----G-TA-G-G-C-G-----G--A-TA-G-T-T-----  
AA---G-T-T-A-----G-A-G--G-TG--A-AA-GC--C-C-AG-G-G-----CT-C-AA-----C-C-C-T-G-G-A--A-C---T-G--C-C---T-T-----T-AA-T-A--C-----T-G-G--CT--G-T-C---T-A-G-A-G-A--T---C-GA----GA-G-A-----G-G-T-G--AG-T-----GG--A--ATT---C-C-G-  
A-GT--GT-A-G-AG-GT--G---A--A-A---TT-C-GT-AG--AT-A-TT--C-G--G-A-G-G-A-AC-A-CC---AG--T--G--GC-GAA-G--G-C-G-----G--C-T-C-A---CTG--G--CT-C-G-----A-T---A-C-T--GA--CG-C-T-G--A-GG--T-G-CG-A--AA-G-C---G-TG--GG-G--  
AG-C-A-AA-----CA--GG Bacteria(100);Proteobacteria(100);Alphaproteobacteria(100);unclassified(64);unclassified(64);unclassified(64);unclassified(64);unclassified(64);unclassified(64);

Otu0516 0 0 0 0 0 0 0 0 0 0 0 0 0 0 0 0 0 0 0 0 0 0 0 2 0 0 0 0 0 0  
0 0 0 0 0 0 0 0 0 0 0 0 0 0 0 0 0 0 0 0 0 0 0 0 0 0 47 0 0 0  
0 0 0 0 0 0 0 0 0 0 0 0 0 0 0 0 0 0 0 0 0 0 0 0 0 0 0 0 0 0  
0 0 0 0 0 0 0 0 0 0 0 0 0 0 0 0 0 0 0 0 0 0 0 0 0 0 0 0  
M02255\_77\_000000000-ADUT3\_1\_1118\_4536\_14012 T---AC---GA-AG-GGG-----GCT-A-G-----C--G--T---T-GC-T-CGG-AA-----TT-A--C-T--GG-GC-----GT--A----AA-GC-GC-GC-----G-TA-G-G-C-G-----G--A-TC-T-T-T-----AA-  
---G-T-C-A-----G-G-G--G-TG--A-AA-TC--C-C-GG-G-G-----CT-C-AA-----C-C-C-C-G-G-A--A-C---T-G--C-C---T-T-----T-GA-T-A--C-----T-G-G--GG--A-T-C---T-T-G-A-G-T--T---C-GA----GA-G-A-----G-G-T-C---GG-T-----GG--A--ACT---G-C-G-A-  
GT--GT-A-G-AG-GT--G---A--A-A---TT-C-GT-AG--AT-A-TT--C-G--C-A-A-G-A-AC-A-CC---AG--T--G--GC-GAA-G--G-C-G-----G--C-C-G-A---CTG--G--CT-C-G-----A-C---A-C-T--GA--CG-C-T-G--A-GG--C-G-CG-A--AA-G-C---G-TG--GG-G--AG-  
C-A-AA-----CA--GG Bacteria(100);Proteobacteria(100);Alphaproteobacteria(100);Rhizobiales(88);unclassified(88);unclassified(88);unclassified(88);unclassified(88);unclassified(88);

Otu0517 0 0 0 0 0 0 0 0 0 0 0 0 0 0 1 0 0 0 0 0 0 0 0 0 0 0 0 0 0  
0 0 0 0 0 0 0 0 0 0 0 0 0 0 0 0 0 0 0 0 0 0 0 0 0 0 10 0 0 0  
0 0 0 0 0 0 0 0 0 0 0 0 0 0 0 0 0 0 0 0 0 0 0 0 0 0 0 0 0  
0 0 21 0 0 0 0 0 0 0 0 0 0 0 0 0 0 0 0 0 0 0 0 0 0 0 0 0  
M02255\_77\_000000000-ADUT3\_1\_2114\_21976\_16697 T---AC---GT-AG-GGT-----GCGAG-----C--G--T---T-GT-C-CGG-AT-----TT-A--T-T--GG-GC-----GT--A----AA-GA-GC-TC-----G-TA-G-G-T-G-----G--T-TT-G-T-T-----  
----GC---G-T-C-G-----G-G-A--G-TG--A-AA-AC--A-C-GG-G-G-----CT-T-AA-----C-T-T-C-G-T-G--C-T---T-G--C-T---T-T-----C--GA-T-A--C-----G--G-G--CA--G-A-C---T-T-G-A-G-G--A--A-GG----TA-G-G-----G-G-A-G---AA-C-----GG--A--ATT---C-  
C-T-G-GT--GG-A-G-CG-GT--G---G--A-A---TG-C-GC-AG--AT-A-TC--A-G--G-A-G-G-A-AC-A-CC---GG--T--G--GC-GAA-G--G-C-G-----G--T-T-C-T---CTG--G--AC-C-T-----T-T---C-C-T--GA--CG-C-T-G--A-GG--A-G-CG-A--AA-G-C---G-TG--GG-  
G--AG-C-A-AA-----CA--GG Bacteria(100);Actinobacteria(100);Actinobacteria(100);Actinobacteridae(100);Actinomycetales(100);unclassified(100);unclassified(100);unclassified(100);unclassified(100);

Otu0518 0 100 0 0 0 0 77 5 31 0 0 0 0 0 0 0 0 0 0 0 0 0 0 0 0 0 0 0 0  
0 0 0 0 0 0 0 0 0 0 0 22 0 0 0 0 0 0 0 0 0 0 0 0 0 0 0 0  
0 0 0 0 0 0 0 0 0 0 0 0 0 0 0 0 0 0 0 0 0 0 0 0 0 0 0 0  
0 0 0 0 0 0 0 0 0 0 0 0 0 0 0 0 0 0 0 0 0 0 0 1 11 0 0  
M02255\_77\_000000000-ADUT3\_1\_2108\_20327\_11889 T---AC---GT-AG-GGG-----GCA-A-G-----C--G--T---T-AT-C-CGG-AT-----TT-A--C-T--GG-GT-----GT--A----AA-GG-GA-GC-----G-TA-G-A-C-G-----G--A-AC-A-G-C-----  
-----AA---G-T-C-T-----G-A-T--G--TG--A-AA-AC--C-C-GG-G-G-----CT-C-AA-----C-C-C-C-G-G-G--A-C---T-G--C-A--T-T-----G--GA-A-A--C-----T--G-T--TG--A-T-C---T-A-G-A-G-T--G---T-CG----GA-G-A-----G-G-T-A--AG-T-----GG--A--ATT---  
C-C-T-A-GT--GT-A-G-CG-GT--G---A--A-A---TG-C-GT-AG--AT-A-TT--A-G--G-A-G-G-A-AC-A-CC---AG--T--G--GC-GAA-G--G-C-G-----G--C-T-T-A---CTG--G--AC-G-A-----T-G---A-C-T--GA--CG-T-T-G--A-GG--C-T-CG-A--AA-G-C---G-TG--GG-  
G--AG-C-A-AA-----CA--GG Bacteria(100);Firmicutes(100);Clostridia(100);Clostridiales(100);Lachnospiraceae(100);unclassified(100);unclassified(100);unclassified(100);unclassified(100);

Otu0519 0 0 0 0 0 2 1 0 0 0 0 0 0 1 0 0 0 0 0 0 0 0 0 0 0 0 0 1 0 0  
0 0 0 0 0 0 0 0 0 0 0 0 0 0 0 0 3 0 0 0 0 0 0 0 0 0 0 0  
0 0 0 0 0 0 0 0 0 0 0 0 0 0 0 0 0 0 0 0 4 0 0 0 0 0 0 0  
1 0 0 0 0 0 0 0 0 0 0 0 0 0 0 0 1 0 0 0 0 0 0 0 0 0 0  
M02255\_77\_000000000-ADUT3\_1\_1113\_16935\_4619 C---TA---AC-TC-TGT-----GCC-A-G-----C--A--G---C--CG-C-GGT-AA-----TA-C--A-G--AG-GG-----GG--C----AA-GC-GT-TA-----A-TC-G-GAATT-----A--C-TC-T-A-T-----AA-  
---G-T-C-A-----G-A-T--G--TG--A-AA-TC--C-C-CG-G-G-----CT-T-AA-----C-C-T-G-G-G-A--A-C---T-G--C-A--T-C-----T--GA-A-A--C-----T--G-T--AG--A-G-C---T-A-G-A-G-T--A--T-GT----GA-G-A-----G-G-A-A---GG-T-----AG--A--ATT---C-C-A-G-  
GT--GT-A-G-CG-GT--G---A--A-A---TG-C-GT-AG--AG-A-TC--T-G--G-A-G-G-A-AT-A-CC---GA--T--G--GC-GAA-G--G-C-A-----G--C-C-T-T---CTG--G--CA-T-A-----A-T---A-C-T--GA--CA-C-T-G--A-GG--C-T-CG-A--AA-G-C---G-TG--GG-T--AG-C-  
A-AA-----CA--GG Bacteria(100);Proteobacteria(100);Gammaproteobacteria(100);Pseudomonadales(100);Moraxellaceae(100);Psychrobacter(65);unclassified(65);unclassified(65);unclassified(65);



|                                                                                                                                                                                                                             |    |    |    |     |   |   |     |    |     |   |    |   |    |   |   |   |    |   |   |   |   |    |     |   |    |    |   |     |
|-----------------------------------------------------------------------------------------------------------------------------------------------------------------------------------------------------------------------------|----|----|----|-----|---|---|-----|----|-----|---|----|---|----|---|---|---|----|---|---|---|---|----|-----|---|----|----|---|-----|
| Otu0520                                                                                                                                                                                                                     | 0  | 0  | 0  | 0   | 0 | 0 | 49  | 0  | 226 | 0 | 0  | 0 | 0  | 0 | 0 | 0 | 0  | 0 | 0 | 0 | 0 | 0  | 0   | 0 | 0  | 0  | 0 |     |
|                                                                                                                                                                                                                             | 0  | 0  | 0  | 1   | 0 | 0 | 0   | 0  | 0   | 0 | 0  | 0 | 0  | 0 | 0 | 0 | 0  | 0 | 0 | 0 | 0 | 0  | 0   | 0 | 0  | 0  | 0 |     |
|                                                                                                                                                                                                                             | 0  | 0  | 0  | 0   | 0 | 0 | 0   | 0  | 0   | 0 | 0  | 0 | 0  | 0 | 0 | 0 | 0  | 0 | 0 | 0 | 0 | 0  | 0   | 0 | 0  | 0  | 0 |     |
|                                                                                                                                                                                                                             | 0  | 0  | 0  | 0   | 0 | 0 | 0   | 0  | 0   | 0 | 0  | 0 | 0  | 0 | 0 | 0 | 0  | 0 | 0 | 0 | 0 | 0  | 0   | 0 | 0  | 0  | 0 |     |
| M02255_77_000000000-ADUT3_1_1106_10451_19332 T---AC---GT-AG-GGG-----GCG-A-G-----C-G--T--T--AT-C-CGG-AA-----TT-A--C-T--GG-GT-----GT-A----AA-GG-GT-GC-----G-TA-G-G-C-G-----G--T-AC-G-G-C----                                  |    |    |    |     |   |   |     |    |     |   |    |   |    |   |   |   |    |   |   |   |   |    |     |   |    |    |   |     |
| -----AA---G-T-T-T-----G-A-T--G--TG--A-AA-CC--C-G-CG-G-G----CT-T-AA-----C-C-C-G-A-G-G--C-A---T-G--C-A--T-C-----G-AA-A-A--C-----T-A-C--TG--A-A-C---T-A-G-A-G-T--G--C-AG-----GA-G-A-----G-G-A-A--AG-C-----GG--A--ATT----       |    |    |    |     |   |   |     |    |     |   |    |   |    |   |   |   |    |   |   |   |   |    |     |   |    |    |   |     |
| C-C-T-A-GT--GT-A-G-CG-GT--G---A-A-A---TG-C-GT-AG--AT-A-TT--A-G--G-A-A-G-A-AC-A-CC--AG--T--G--GC-GAA-G--G-C--G-----G--C-T-T-T---CTG--G--AC-T-G-----C-A---A-C-T--GA--CG-C-T-G--A-GG--C-A-CG-A--AA-G-C---G-TG--GG-             |    |    |    |     |   |   |     |    |     |   |    |   |    |   |   |   |    |   |   |   |   |    |     |   |    |    |   |     |
| G--AG-C-A-AA-----CA--GG Bacteria(100);unclassified(82);unclassified(82);unclassified(82);unclassified(82);unclassified(82);unclassified(82);unclassified(82);unclassified(82);                                              |    |    |    |     |   |   |     |    |     |   |    |   |    |   |   |   |    |   |   |   |   |    |     |   |    |    |   |     |
| Otu0521                                                                                                                                                                                                                     | 0  | 84 | 76 | 0   | 0 | 0 | 223 | 59 | 837 | 0 | 0  | 0 | 0  | 0 | 0 | 0 | 0  | 0 | 0 | 0 | 0 | 0  | 0   | 0 | 0  | 4  | 0 | 0   |
|                                                                                                                                                                                                                             | 0  | 0  | 0  | 59  | 0 | 0 | 0   | 0  | 0   | 0 | 69 | 0 | 0  | 0 | 0 | 0 | 0  | 0 | 0 | 0 | 0 | 0  | 0   | 0 | 0  | 0  | 0 | 0   |
|                                                                                                                                                                                                                             | 27 | 0  | 0  | 0   | 0 | 0 | 1   | 0  | 0   | 0 | 0  | 0 | 0  | 0 | 3 | 0 | 66 | 0 | 0 | 0 | 0 | 4  | 0   | 0 | 23 | 0  | 0 | 0   |
|                                                                                                                                                                                                                             | 0  | 0  | 0  | 0   | 0 | 0 | 2   | 0  | 0   | 0 | 57 | 0 | 57 | 0 | 0 | 0 | 0  | 0 | 0 | 0 | 0 | 5  | 133 | 0 | 0  | 0  | 0 | 0   |
| M02255_77_000000000-ADUT3_1_1111_15155_14051 T---AC---GT-AG-GGG-----GCG-A-G-----C-G--T--T--AT-C-CGG-AT-----TT-A--C-T--GG-GT-----GT-A----AA-GG-GA-GT-----G-TA-G-A-C-G-----G--C-GT-A-T-C----                                  |    |    |    |     |   |   |     |    |     |   |    |   |    |   |   |   |    |   |   |   |   |    |     |   |    |    |   |     |
| -----AA---G-T-C-T-----G-A-T--G--TG--A-AA-GG--C-A-GG-G-G----CT-T-AA-----C-C-C-C-T-G-G--A-C---T-G--C-A--T-T-----G--GA-A-A--C-----T--G-G--TA--T-G-C---T-T-G-A-G-T--G--C-CG-----GA-G-G-----G-G-T-A--AG-C-----GG--A--ATT----     |    |    |    |     |   |   |     |    |     |   |    |   |    |   |   |   |    |   |   |   |   |    |     |   |    |    |   |     |
| C-C-T-A-GT--GT-A-G-CG-GT--G---A-A-A---TG-C-GT-AG--AT-A-TT--A-G--G-A-G-G-A-AC-A-CC--AG--T--G--GC-GAA-G--G-C--G-----G--C-T-T-A---CTG--G--AC-G-G-----T-A---A-C-T--GA--CG-T-T-G--A-GG--C-T-CG-A--AA-G-C---G-TG--GG-             |    |    |    |     |   |   |     |    |     |   |    |   |    |   |   |   |    |   |   |   |   |    |     |   |    |    |   |     |
| G--AG-C-A-AA-----CA--GG Bacteria(100);Firmicutes(100);Clostridia(100);Clostridiales(100);Lachnospiraceae(100);Blautia(99);unclassified(99);unclassified(99);unclassified(99);                                               |    |    |    |     |   |   |     |    |     |   |    |   |    |   |   |   |    |   |   |   |   |    |     |   |    |    |   |     |
| Otu0522                                                                                                                                                                                                                     | 0  | 0  | 0  | 314 | 0 | 0 | 0   | 0  | 0   | 0 | 0  | 0 | 0  | 0 | 0 | 0 | 0  | 0 | 0 | 0 | 0 | 0  | 0   | 0 | 0  | 0  | 0 | 0   |
|                                                                                                                                                                                                                             | 0  | 0  | 0  | 0   | 0 | 0 | 0   | 0  | 0   | 0 | 0  | 0 | 0  | 0 | 0 | 0 | 0  | 0 | 0 | 0 | 0 | 0  | 0   | 0 | 0  | 19 | 0 |     |
|                                                                                                                                                                                                                             | 0  | 0  | 0  | 0   | 0 | 0 | 0   | 0  | 0   | 0 | 0  | 0 | 0  | 0 | 0 | 0 | 0  | 0 | 0 | 0 | 0 | 0  | 0   | 0 | 0  | 0  | 0 | 0   |
|                                                                                                                                                                                                                             | 0  | 0  | 0  | 0   | 0 | 0 | 0   | 0  | 0   | 0 | 0  | 0 | 0  | 0 | 0 | 0 | 0  | 0 | 0 | 0 | 0 | 0  | 0   | 0 | 0  | 0  | 0 | 0   |
| M02255_77_000000000-ADUT3_1_1115_7678_20352 T---AC---GG-AG-GGG-----GTT-A-G-----C--G--T--T--GT-T-CGG-AA-----TG-A--C-T--GG-GC-----GT--A----AA-GC-GC-GC-----G-TA-G-G-C-G-----G--A-TC-A-G-C-----                                |    |    |    |     |   |   |     |    |     |   |    |   |    |   |   |   |    |   |   |   |   |    |     |   |    |    |   |     |
| AA---G-T-C-A-----G-G-G--G--TG--A-AA-TC--C-C-GG-G-G----CT-C-AA-----C-C-C-C-G-G-C--A-C---T-G--C-C---T-T-----T--GA-G-A--C-----T--G-T--TG--G-T-C---T-G-G-A-G-T--T---C-GA-----GA-G-A-----G-G-T-G---GG-T-----GG--A--ATT----C-C-G- |    |    |    |     |   |   |     |    |     |   |    |   |    |   |   |   |    |   |   |   |   |    |     |   |    |    |   |     |
| A-GT--GT-A-G-AG-GT--G---A-A-A---TT-C-GT-AG--AT-A-TT--C-G--G-A-G-G-A-AC-A-CC--AG--T--G--GC-GAA-G--G-C--G-----G--C-C-C-A---CTG--G--CT-C-G-----A-C---A-C-T--GA--CG-C-T-G--A-GG--C-G-CG-A--AA-G-C---G-CG--GG-G--                |    |    |    |     |   |   |     |    |     |   |    |   |    |   |   |   |    |   |   |   |   |    |     |   |    |    |   |     |
| AG-C-A-AA-----CA--GG Bacteria(100);Proteobacteria(100);Alphaproteobacteria(100);Rhodobacterales(95);Rhodobacteraceae(95);unclassified(95);unclassified(95);unclassified(95);unclassified(95);                               |    |    |    |     |   |   |     |    |     |   |    |   |    |   |   |   |    |   |   |   |   |    |     |   |    |    |   |     |
| Otu0523                                                                                                                                                                                                                     | 0  | 0  | 0  | 0   | 0 | 0 | 16  | 1  | 40  | 0 | 0  | 0 | 0  | 0 | 0 | 0 | 0  | 0 | 0 | 0 | 0 | 7  | 0   | 0 | 0  | 0  | 0 | 0   |
|                                                                                                                                                                                                                             | 0  | 0  | 0  | 0   | 0 | 0 | 0   | 0  | 0   | 0 | 41 | 0 | 0  | 0 | 0 | 0 | 0  | 0 | 0 | 0 | 0 | 0  | 0   | 0 | 0  | 0  | 0 | 0   |
|                                                                                                                                                                                                                             | 0  | 0  | 0  | 0   | 0 | 0 | 0   | 0  | 0   | 0 | 0  | 0 | 0  | 0 | 6 | 0 | 23 | 0 | 0 | 0 | 0 | 0  | 0   | 0 | 0  | 0  | 0 | 203 |
|                                                                                                                                                                                                                             | 0  | 0  | 0  | 0   | 0 | 0 | 0   | 0  | 0   | 0 | 46 | 0 | 0  | 0 | 0 | 0 | 0  | 0 | 0 | 0 | 0 | 15 | 153 | 0 | 0  | 0  | 0 | 0   |
| M02255_77_000000000-ADUT3_1_1116_15727_17296 T---AC---GT-AT-GGT-----GCA-A-G-----C--G--T--T--AT-C-CGG-AT-----TT-A--C-T--GG-GT-----GT--A----AA-GG-GA-GC-----G-TA-G-G-T-G-----G--C-AA-G-G-C----                                |    |    |    |     |   |   |     |    |     |   |    |   |    |   |   |   |    |   |   |   |   |    |     |   |    |    |   |     |
| -----AA---G-C-C-A-----G-A-A--G--TG--A-AA-AC--C-C-GG-G-G----CT-C-AA-----C-C-G-C-G-G-G--A-T---T-G--C-T---T-T-----T--GG-A-A--C-----T--G-C--CA--T-G-C---T-A-G-A-G-T--G--C-AG-----GA-G-G-----G-G-T-G---AG-C-----GG--A--ATT----   |    |    |    |     |   |   |     |    |     |   |    |   |    |   |   |   |    |   |   |   |   |    |     |   |    |    |   |     |
| C-C-T-A-GT--GT-A-G-CG-GT--G---A-A-A---TG-C-GT-AG--AT-A-TT--A-G--G-A-G-G-A-AC-A-CC--AG--A--G--GC-GAA-G--G-C--G-----G--C-T-C-A---CTG--G--AC-T-G-----T-A---A-C-T--GA--CA-C-T-G--A-GG--C-T-CG-A--AA-G-C---G-TG--GG-             |    |    |    |     |   |   |     |    |     |   |    |   |    |   |   |   |    |   |   |   |   |    |     |   |    |    |   |     |
| G--AG-C-A-AA-----CA--GG Bacteria(100);Firmicutes(100);Clostridia(100);Clostridiales(100);Lachnospiraceae(100);unclassified(100);unclassified(100);unclassified(100);unclassified(100);                                      |    |    |    |     |   |   |     |    |     |   |    |   |    |   |   |   |    |   |   |   |   |    |     |   |    |    |   |     |
| Otu0524                                                                                                                                                                                                                     | 0  | 0  | 0  | 0   | 0 | 0 | 0   | 0  | 0   | 0 | 0  | 0 | 0  | 1 | 0 | 0 | 0  | 0 | 0 | 0 | 0 | 0  | 0   | 0 | 0  | 0  | 0 | 0   |
|                                                                                                                                                                                                                             | 0  | 0  | 0  | 0   | 0 | 0 | 0   | 0  | 0   | 0 | 29 | 0 | 0  | 0 | 0 | 0 | 0  | 0 | 0 | 0 | 0 | 0  | 0   | 0 | 0  | 0  | 0 | 0   |
|                                                                                                                                                                                                                             | 0  | 0  | 0  | 0   | 0 | 0 | 0   | 0  | 0   | 0 | 0  | 0 | 4  | 5 | 0 | 0 | 0  | 0 | 0 | 0 | 0 | 0  | 0   | 0 | 0  | 0  | 0 | 0   |
|                                                                                                                                                                                                                             | 0  | 0  | 0  | 0   | 0 | 0 | 0   | 0  | 0   | 0 | 86 | 0 | 0  | 0 | 9 | 0 | 0  | 0 | 0 | 0 | 0 | 0  | 0   | 0 | 0  | 0  | 0 | 0   |
| M02255_77_000000000-ADUT3_1_2110_19549_21157 T---AC---GT-AG-GGG-----GCA-A-G-----C--G--T--T--AT-C-CGG-AA-----TT-A--T-T--GG-GC-----GT--A----AA-GA-GT-GC-----G-TA-G-G-T-G-----GT---TA-T-C-T-----                               |    |    |    |     |   |   |     |    |     |   |    |   |    |   |   |   |    |   |   |   |   |    |     |   |    |    |   |     |
| -----AA---G-C-G-T-----A-A-G--G--TT--T-AA-GC--G-T-GC-A-G----CT-C-AA-----C-T-G-C-A-T-C--T-----C-G--C-C---T-T-----G--CG-A-A--C-----T--G-G--AC--T-A-C---T-T-G-A-G-T--G--C-AG-----GA-G-G-----G-G-A-A--AG-C-----GG--A--ATT----C-  |    |    |    |     |   |   |     |    |     |   |    |   |    |   |   |   |    |   |   |   |   |    |     |   |    |    |   |     |
| C-T-A-GT--GT-A-G-CG-GT--G---A-A-A---TG-C-GT-AG--AT-A-TT--A-G--G-A-G-G-A-AC-G-CC--AG--C--G--GC-GAA-G--G-C--G-----G--C-T-T-T---CTG--G--AC-T-G-----T-A---A-C-T--GA--CA-C-T-G--A-GG--C-A-CG-A--AA-G-C---G-TG--GG-G-             |    |    |    |     |   |   |     |    |     |   |    |   |    |   |   |   |    |   |   |   |   |    |     |   |    |    |   |     |
| -AG-C-A-AA-----CA--GG Bacteria(100);Firmicutes(100);Clostridia(100);Clostridiales(100);Family_XIII_Incertae_Sedis(100);unclassified(100);unclassified(100);unclassified(100);unclassified(100);                             |    |    |    |     |   |   |     |    |     |   |    |   |    |   |   |   |    |   |   |   |   |    |     |   |    |    |   |     |



|         |                                                                                                                                                                                                                             |    |    |    |    |    |    |    |    |    |   |    |    |    |    |    |   |   |     |    |   |    |    |   |   |    |   |  |
|---------|-----------------------------------------------------------------------------------------------------------------------------------------------------------------------------------------------------------------------------|----|----|----|----|----|----|----|----|----|---|----|----|----|----|----|---|---|-----|----|---|----|----|---|---|----|---|--|
| Otu0525 | 0                                                                                                                                                                                                                           | 0  | 0  | 0  | 0  | 0  | 0  | 0  | 0  | 0  | 0 | 0  | 8  | 0  | 0  | 0  | 0 | 0 | 0   | 0  | 0 | 0  | 0  | 0 | 0 | 0  | 0 |  |
|         | 0                                                                                                                                                                                                                           | 0  | 0  | 0  | 0  | 0  | 0  | 0  | 0  | 0  | 0 | 14 | 0  | 0  | 0  | 0  | 0 | 0 | 586 | 0  | 0 | 0  | 0  | 0 | 0 | 0  | 0 |  |
|         | 0                                                                                                                                                                                                                           | 0  | 0  | 0  | 0  | 0  | 0  | 0  | 0  | 0  | 0 | 0  | 0  | 0  | 0  | 0  | 0 | 0 | 0   | 0  | 0 | 16 | 0  | 0 | 0 | 0  |   |  |
|         | 35                                                                                                                                                                                                                          | 0  | 0  | 0  | 0  | 0  | 0  | 0  | 0  | 0  | 0 | 0  | 0  | 0  | 0  | 0  | 0 | 0 | 0   | 0  | 0 | 0  | 0  | 0 | 0 | 0  |   |  |
|         | M02255_77_000000000-ADUT3_1_1106_19317_18027 T---AC---GT-AG-GTG-----GCG-A-G-----C-G--T---T-GT-C-CGG-AA-----TT-A--T-T-GG-GC-----GT--A----AA-GG-AT-GC-----G-TA-G-G-T-G-----G--A-TA-T-T-T-----                                 |    |    |    |    |    |    |    |    |    |   |    |    |    |    |    |   |   |     |    |   |    |    |   |   |    |   |  |
|         | -----AA---G-T-G-G-----G-A-T--G--TG--A-AA-TC--C-C-CG-G-G-----CT-C-AA-----C-C-C-G-G-G-A-A-C---T-G--C-A--T-T-----C--CA-T-A--C-----T-G-G--AT--G-T-C---T-A-G-A-G-T--G---C-AG-----GA-G-A-----G-G-A-A--AG--C---GG--A--ATT---C-     |    |    |    |    |    |    |    |    |    |   |    |    |    |    |    |   |   |     |    |   |    |    |   |   |    |   |  |
|         | C-T-A-GT--GT-A-G-CG-GT--G---A--A-A---TG-C-GT-AG--AT-A-TT--A-G--G-A-G-G-A-AC-A-CC---AG--T--G--GC-GAA-G--G-C-G-----G--C-T-T-T---CTG--G--AC-T-G-----T-A--A-C-T--GA--CA-C-T-G--A-GG--C-A-TG-A--AA-G-C---G-TG--GG-T-             |    |    |    |    |    |    |    |    |    |   |    |    |    |    |    |   |   |     |    |   |    |    |   |   |    |   |  |
|         | -AG-C-A-AA-----CA--GG Bacteria(100);Firmicutes(100);Clostridia(100);Clostridiales(100);Clostridiaceae(98);Clostridium(98);unclassified(98);unclassified(98);unclassified(98);                                               |    |    |    |    |    |    |    |    |    |   |    |    |    |    |    |   |   |     |    |   |    |    |   |   |    |   |  |
| Otu0526 | 0                                                                                                                                                                                                                           | 0  | 0  | 0  | 0  | 0  | 0  | 0  | 0  | 0  | 0 | 0  | 0  | 0  | 0  | 0  | 0 | 0 | 0   | 0  | 0 | 0  | 0  | 0 | 0 | 0  |   |  |
|         | 0                                                                                                                                                                                                                           | 0  | 0  | 0  | 0  | 0  | 0  | 0  | 17 | 0  | 0 | 0  | 0  | 0  | 0  | 0  | 0 | 0 | 0   | 0  | 0 | 0  | 12 | 0 | 0 | 0  |   |  |
|         | 0                                                                                                                                                                                                                           | 0  | 0  | 0  | 0  | 0  | 0  | 0  | 0  | 0  | 0 | 0  | 0  | 0  | 0  | 0  | 0 | 0 | 0   | 0  | 0 | 0  | 0  | 0 | 0 | 0  |   |  |
|         | 0                                                                                                                                                                                                                           | 0  | 0  | 0  | 0  | 0  | 0  | 0  | 0  | 0  | 0 | 0  | 0  | 0  | 0  | 0  | 0 | 0 | 0   | 0  | 0 | 0  | 0  | 0 | 0 | 0  |   |  |
|         | M02255_77_000000000-ADUT3_1_2102_20632_17000 T---AC---GA-AG-GGG-----GCT-A-G-----C-G--T---T-GC-T-CGG-AA-----TC-A--C-T-GG-GC-----GT--A----AA-GG-GC-GC-----G-TA-G-G-C-G-----G--C-GG-A-C-T-----                                 |    |    |    |    |    |    |    |    |    |   |    |    |    |    |    |   |   |     |    |   |    |    |   |   |    |   |  |
|         | -----TA---G-T-C-G-----G-G-C--G--TG--A-AA-TC--C-C-CG-G-G-----CT-C-AA-----C-C-C-G-G-G-G-G--G-C---T-G--C-G--C-C-----C--GA-T-A--C-----G--G-G--TC--C-G-C---T-G-G-A-G-G--A--C-GG-----GA-G-A-----G-G-C-T--CG-C-----GG--A--ATT----- |    |    |    |    |    |    |    |    |    |   |    |    |    |    |    |   |   |     |    |   |    |    |   |   |    |   |  |
|         | C-C-C-A-GT--GT-A-G-AG-GT--G---A--A-A---TG-C-GT-AG--AT-A-TT--G-G--G-A-A-G-A-AC-A-CC---GG--T--G--GC-GAA-G--G-C-G-----G--C-G-A-G---CTG--G--CC-C-G-----T-T---T-C-T--GA--CG-C-T-G--A-GG--C-G-CG-A--CA-G-C---G-TG--               |    |    |    |    |    |    |    |    |    |   |    |    |    |    |    |   |   |     |    |   |    |    |   |   |    |   |  |
|         | GG-G--AG-C-A-AA-----CA--GG Bacteria(100);Proteobacteria(100);Alphaproteobacteria(100);Rhodospirillales(100);unclassified(100);unclassified(100);unclassified(100);unclassified(100);unclassified(100);                      |    |    |    |    |    |    |    |    |    |   |    |    |    |    |    |   |   |     |    |   |    |    |   |   |    |   |  |
| Otu0527 | 0                                                                                                                                                                                                                           | 0  | 0  | 37 | 0  | 0  | 0  | 0  | 0  | 0  | 0 | 0  | 0  | 0  | 0  | 0  | 0 | 0 | 0   | 0  | 0 | 0  | 0  | 0 | 0 | 0  |   |  |
|         | 0                                                                                                                                                                                                                           | 0  | 0  | 0  | 0  | 0  | 0  | 0  | 0  | 0  | 0 | 0  | 0  | 0  | 0  | 0  | 0 | 0 | 0   | 0  | 0 | 0  | 0  | 0 | 0 | 62 |   |  |
|         | 0                                                                                                                                                                                                                           | 0  | 0  | 0  | 0  | 0  | 0  | 0  | 0  | 0  | 0 | 0  | 0  | 0  | 0  | 0  | 0 | 0 | 0   | 0  | 0 | 0  | 0  | 0 | 0 | 0  |   |  |
|         | 0                                                                                                                                                                                                                           | 0  | 0  | 0  | 0  | 0  | 0  | 0  | 0  | 0  | 0 | 0  | 0  | 0  | 0  | 0  | 0 | 0 | 0   | 0  | 0 | 0  | 0  | 0 | 0 | 0  |   |  |
|         | M02255_77_000000000-ADUT3_1_1106_9021_22356 T---AC---GT-AG-GGT-----GCG-A-G-----C-G--T---T-GT-C-CGG-AA-----TT-A--T-T-GG-GC-----GT--A----AA-GG-GC-TT-----G-TA-G-G-C-G-----G--T-TC-G-T-C-----AC-                               |    |    |    |    |    |    |    |    |    |   |    |    |    |    |    |   |   |     |    |   |    |    |   |   |    |   |  |
|         | ---G-T-C-G-----A-A-A--G--TG--A-AA-AC--T-C-AG-G-G-----CT-T-AA-----C-C-C-T-G-A-G--C-C---T-G--C-T--T-T-----C--GA-T-A--C-----G--G-G--TG--A-A-C---T-A-G-A-G-G--A--A-TG-----CA-G-G-----G-G-A-G---AA-C-----GG--A--ATT---C-C-T-G-   |    |    |    |    |    |    |    |    |    |   |    |    |    |    |    |   |   |     |    |   |    |    |   |   |    |   |  |
|         | GT--GG-A-G-CG-GT--G---G--A-A---TG-C-GC-AG--AT-A-TC--A-G--G-A-G-G-A-AC-A-CC---GG--T--G--GC-GAA-G--G-C-G-----G--T-T-C-T---CTG--G--GC-A-T-----T-A--C-C-T--GA--CG-C-T-G--A-GA--A-G-CG-A--AA-G-C---G-TG--GG-G--AG-               |    |    |    |    |    |    |    |    |    |   |    |    |    |    |    |   |   |     |    |   |    |    |   |   |    |   |  |
|         | C-A-AA-----CA--GG Bacteria(100);Actinobacteria(100);Actinobacteria(100);Actinobacteridae(100);Actinomycetales(100);Propionibacterineae(100);Propionibacteriaceae(100);unclassified(100);unclassified(100);                  |    |    |    |    |    |    |    |    |    |   |    |    |    |    |    |   |   |     |    |   |    |    |   |   |    |   |  |
| Otu0528 | 123                                                                                                                                                                                                                         | 37 | 11 | 28 | 74 | 12 | 37 | 8  | 18 | 10 | 0 | 3  | 0  | 0  | 0  | 0  | 0 | 0 | 0   | 16 | 4 | 0  | 0  | 0 | 0 | 3  | 5 |  |
|         | 0                                                                                                                                                                                                                           | 0  | 0  | 25 | 18 | 23 | 64 | 60 | 49 | 47 | 5 | 8  | 26 | 25 | 54 | 97 | 0 | 0 | 0   | 14 | 0 | 0  | 18 | 2 | 0 | 0  | 5 |  |
|         | 0                                                                                                                                                                                                                           | 36 | 0  | 1  | 0  | 0  | 1  | 0  | 0  | 0  | 0 | 0  | 1  | 5  | 4  | 16 | 8 | 0 | 2   | 0  | 0 | 0  | 4  | 8 | 0 | 0  | 0 |  |
|         | 0                                                                                                                                                                                                                           | 0  | 0  | 0  | 2  | 3  | 0  | 0  | 6  | 0  | 4 | 0  | 16 | 0  | 5  | 0  | 0 | 4 | 71  |    |   |    |    |   |   |    |   |  |



|                                                                                                                                                                                                                      |    |     |    |   |   |   |    |    |    |   |    |   |   |    |    |   |   |   |   |   |   |   |   |   |   |    |  |
|----------------------------------------------------------------------------------------------------------------------------------------------------------------------------------------------------------------------|----|-----|----|---|---|---|----|----|----|---|----|---|---|----|----|---|---|---|---|---|---|---|---|---|---|----|--|
| Otu0530                                                                                                                                                                                                              | 0  | 0   | 0  | 0 | 0 | 0 | 0  | 0  | 0  | 0 | 0  | 0 | 0 | 0  | 0  | 0 | 0 | 0 | 0 | 0 | 0 | 0 | 0 | 0 | 0 | 0  |  |
|                                                                                                                                                                                                                      | 0  | 0   | 0  | 0 | 0 | 0 | 0  | 0  | 0  | 0 | 0  | 0 | 0 | 0  | 90 | 0 | 0 | 0 | 0 | 0 | 0 | 0 | 0 | 0 | 0 | 0  |  |
|                                                                                                                                                                                                                      | 26 | 136 | 0  | 0 | 0 | 0 | 0  | 1  | 0  | 0 | 0  | 0 | 0 | 0  | 0  | 0 | 0 | 0 | 0 | 0 | 0 | 0 | 0 | 0 | 0 | 0  |  |
|                                                                                                                                                                                                                      | 0  | 0   | 0  | 0 | 0 | 0 | 0  | 0  | 0  | 0 | 0  | 0 | 0 | 0  | 0  | 0 | 0 | 0 | 0 | 0 | 0 | 0 | 0 | 0 | 0 | 0  |  |
| M02255_77_000000000-ADUT3_1_2116_10727_22179 T---AC---GG-AG-GGT-----GCA-A-G-----C--G--T---T-AC-T-CGG-AA-----TC-A--C-T-GG-GC-----GT--A----AA-GG-AC-GC-----G-TA-G-G-C-G-----G--A-TT-A-T-C-----                         |    |     |    |   |   |   |    |    |    |   |    |   |   |    |    |   |   |   |   |   |   |   |   |   |   |    |  |
| -----AA---G-T-C-T-----C-T-T--G--TG--A-AA-TC--T-A-GT-G-G----CT-T-AA-----C-C-A-C-T-A-A--A-C---T-G--C-T--T-G-----G--GA-A-A--C-----T-G-A-TA--A-T-C---T-A-G-A-G-T-A--A-GG----GA-G-A-----G-G-C-A--GA-T----GG--A--ATT---C-  |    |     |    |   |   |   |    |    |    |   |    |   |   |    |    |   |   |   |   |   |   |   |   |   |   |    |  |
| T-T-G-GT--GT-A-G-GG-GT--A--A-A-A---TC-C-GT-AG--AG-A-TC--A-A--G-A-A-G-A-AT-A-CT--TA--T--T-GC-GAA-G--G-C-G-----A--T-C-T-G---CTA--G--AA-C-T-----T-A--A-C-T-GA--CG-C-T-A--A-TG--C-G-TG-A--AA-G-C--G-TG--GG-G--           |    |     |    |   |   |   |    |    |    |   |    |   |   |    |    |   |   |   |   |   |   |   |   |   |   |    |  |
| AG-C-A-AA-----CA--GG Bacteria(100);Proteobacteria(100);Epsilonproteobacteria(100);Campylobacterales(100);Campylobacteraceae(100);Campylobacter(100);unclassified(100);unclassified(100);unclassified(100);           |    |     |    |   |   |   |    |    |    |   |    |   |   |    |    |   |   |   |   |   |   |   |   |   |   |    |  |
| Otu0531                                                                                                                                                                                                              | 0  | 0   | 0  | 0 | 0 | 0 | 0  | 0  | 0  | 0 | 0  | 0 | 0 | 0  | 0  | 0 | 0 | 0 | 0 | 0 | 0 | 0 | 0 | 0 | 0 | 0  |  |
|                                                                                                                                                                                                                      | 0  | 0   | 0  | 0 | 0 | 0 | 0  | 0  | 0  | 0 | 0  | 0 | 0 | 0  | 10 | 0 | 0 | 0 | 0 | 0 | 0 | 0 | 0 | 0 | 0 | 0  |  |
|                                                                                                                                                                                                                      | 0  | 38  | 0  | 0 | 0 | 0 | 0  | 0  | 0  | 0 | 0  | 0 | 0 | 0  | 0  | 0 | 0 | 0 | 0 | 0 | 0 | 0 | 0 | 0 | 0 | 0  |  |
|                                                                                                                                                                                                                      | 0  | 0   | 0  | 0 | 0 | 0 | 0  | 0  | 0  | 0 | 0  | 0 | 0 | 0  | 0  | 0 | 0 | 0 | 0 | 0 | 0 | 0 | 0 | 0 | 0 | 0  |  |
| M02255_77_000000000-ADUT3_1_1102_12426_18927 T---AC---GT-AG-GAT-----GCA-A-G-----C--G--T---T--AT-C-CGG-AT-----TT-A--C-T-GG-GT-----GT--A----AA-GG-GT-GC-----G-TA-G-G-C-G-----G--A-CT-T-T-C-----                        |    |     |    |   |   |   |    |    |    |   |    |   |   |    |    |   |   |   |   |   |   |   |   |   |   |    |  |
| -----AA---G-T-T-G-----G-A-T--G--TG--A-AA-AC--C-C-GG-G-G----CT-T-AA-----C-C-C-C-G-T-G--A-T---T-G--C-A--T--C-----C--AA-A-A--C-----T-G-T-AG--G-T-C---T-T-G-A-T-T-G--G-AG----TA-G-A-----G-G-T-A--AG-T----GG--A--ATT---C- |    |     |    |   |   |   |    |    |    |   |    |   |   |    |    |   |   |   |   |   |   |   |   |   |   |    |  |
| C-G-A-GT--GT-A-G-CG-GT--G--A-A-A---TG-C-GC-AG--AT-A-TT--C-G--G-A-A-G-A-AC-A-CC---GG-T--T-GC-G-AAG-G-C-G-----A--C-T-T-A---CTG--G--GC-T-C-----T-A--A-A-T-GA--CG-C-T-G--A-GG--C-A-CG-A--AA-G-T--G-TG--GG-G--            |    |     |    |   |   |   |    |    |    |   |    |   |   |    |    |   |   |   |   |   |   |   |   |   |   |    |  |
| -AG-C-A-AA-----CA--GG Bacteria(100);unclassified(100);unclassified(100);unclassified(100);unclassified(100);unclassified(100);unclassified(100);unclassified(100);unclassified(100);                                 |    |     |    |   |   |   |    |    |    |   |    |   |   |    |    |   |   |   |   |   |   |   |   |   |   |    |  |
| Otu0532                                                                                                                                                                                                              | 0  | 0   | 0  | 0 | 0 | 0 | 0  | 0  | 0  | 0 | 0  | 0 | 0 | 0  | 0  | 0 | 0 | 0 | 0 | 0 | 0 | 0 | 0 | 0 | 0 | 0  |  |
|                                                                                                                                                                                                                      | 0  | 0   | 0  | 0 | 0 | 0 | 0  | 0  | 0  | 0 | 0  | 0 | 0 | 0  | 0  | 0 | 0 | 0 | 0 | 0 | 0 | 0 | 0 | 0 | 0 | 0  |  |
|                                                                                                                                                                                                                      | 0  | 74  | 0  | 0 | 0 | 0 | 0  | 0  | 0  | 0 | 0  | 0 | 0 | 0  | 0  | 0 | 0 | 0 | 0 | 0 | 0 | 0 | 0 | 0 | 0 | 0  |  |
|                                                                                                                                                                                                                      | 0  | 0   | 0  | 0 | 0 | 0 | 0  | 0  | 0  | 0 | 0  | 0 | 0 | 0  | 0  | 0 | 0 | 0 | 0 | 0 | 0 | 0 | 0 | 0 | 0 | 0  |  |
| M02255_77_000000000-ADUT3_1_1107_21841_17750 T---AC---GT-AT-GGG-----GCG-A-G-----C--G--T---T--AT-C-CGG-AA-----TT-A--T-T-GG-GC-----GT--A----AA-GA-GT-AC-----G-TA-G-G-T-G-----G--T-TT-C-T-T-----                        |    |     |    |   |   |   |    |    |    |   |    |   |   |    |    |   |   |   |   |   |   |   |   |   |   |    |  |
| -----AA---G-C-G-C-----A-G-G--G--TT--T-AA-GG--C-T-AC-G-G----CT-T-AA-----C-C-G-T-A-G-T-T---T-G--C-C--T--T-----G--TG-A-A--C-----T-G-G-GA--G-A-C---T-T-G-A-G-T-G--C-AG----GA-G-A-----G-G-A-A--AG-C----GG--A--ATT---C-    |    |     |    |   |   |   |    |    |    |   |    |   |   |    |    |   |   |   |   |   |   |   |   |   |   |    |  |
| C-T-A-GT--GT-A-G-CG-GT--G--A-A-A---TG-C-GT-AG--AT-A-TT--A-G--G-A-G-G-A-AC-A-CC---GG-T--G--GC-GAA-G--G-C-G-----G--C-T-T-T---CTG--G--AC-T-G-----T-A--A-C-T-GA--CA-C-T-G--A-GG--T-A-CG-A--AA-G-C--G-TG--GG-G--          |    |     |    |   |   |   |    |    |    |   |    |   |   |    |    |   |   |   |   |   |   |   |   |   |   |    |  |
| -AG-C-A-AA-----CA--GG Bacteria(100);Firmicutes(100);Clostridia(100);Clostridiales(100);unclassified(100);unclassified(100);unclassified(100);unclassified(100);unclassified(100);                                    |    |     |    |   |   |   |    |    |    |   |    |   |   |    |    |   |   |   |   |   |   |   |   |   |   |    |  |
| Otu0533                                                                                                                                                                                                              | 0  | 0   | 34 | 0 | 0 | 0 | 0  | 0  | 51 | 0 | 0  | 0 | 0 | 0  | 0  | 0 | 0 | 0 | 0 | 0 | 0 | 0 | 0 | 0 | 0 | 0  |  |
|                                                                                                                                                                                                                      | 0  | 0   | 0  | 1 | 0 | 0 | 0  | 0  | 0  | 0 | 27 | 0 | 0 | 0  | 0  | 0 | 0 | 0 | 0 | 0 | 0 | 0 | 0 | 0 | 0 | 0  |  |
|                                                                                                                                                                                                                      | 0  | 14  | 0  | 0 | 0 | 0 | 0  | 0  | 0  | 0 | 0  | 0 | 0 | 0  | 0  | 0 | 0 | 0 | 0 | 0 | 0 | 0 | 0 | 0 | 0 | 58 |  |
|                                                                                                                                                                                                                      | 0  | 0   | 0  | 0 | 0 | 0 | 0  | 0  | 0  | 0 | 0  | 0 | 0 | 0  | 0  | 0 | 0 | 0 | 0 | 0 | 0 | 0 | 7 | 0 | 0 |    |  |
| M02255_77_000000000-ADUT3_1_1111_28683_16096 T---AC---GT-AG-GTG-----GCA-A-G-----C--G--T---T--GT-C-CGG-AA-----TT-A--C-T-GG-GT-----GT--A----AA-GG-GA-GC-----G-TA-G-G-C-G-----G--G-GA-G-G-C---                          |    |     |    |   |   |   |    |    |    |   |    |   |   |    |    |   |   |   |   |   |   |   |   |   |   |    |  |
| -----AA---G-T-T-G-----A-A-T--G--TC--T-AA-AC--T-A-TG-G-G----CT-C-AA-----C-T-G-A-T-A-G---T---C-G--C-G--T--T-----C--AA-A-A--C-----T-G-C-CA--C-T-C---T-T-G-A-G-T-G--C-AG----TA-G-A-----G-G-T-A--GG-C----GG--A--ATT---C-  |    |     |    |   |   |   |    |    |    |   |    |   |   |    |    |   |   |   |   |   |   |   |   |   |   |    |  |
| C-T-A-GT--GT-A-G-CG-GT--G--A-A-A---TG-C-GT-AG--AT-A-TT--A-G--G-A-G-G-A-AC-A-CC---AG-T--G--GC-GAA-G--G-C-G-----G--C-C-T-A---CTG--G--GC-T-G-----T-A--A-C-T-GA--CG-C-T-G--A-GG--C-T-CG-A--AA-G-C--G-TG--GG-T-           |    |     |    |   |   |   |    |    |    |   |    |   |   |    |    |   |   |   |   |   |   |   |   |   |   |    |  |
| -AG-C-A-AA-----CA--GG Bacteria(100);Firmicutes(100);Clostridia(100);Clostridiales(100);unclassified(63);unclassified(63);unclassified(63);unclassified(63);unclassified(63);                                         |    |     |    |   |   |   |    |    |    |   |    |   |   |    |    |   |   |   |   |   |   |   |   |   |   |    |  |
| Otu0534                                                                                                                                                                                                              | 0  | 0   | 0  | 0 | 0 | 0 | 0  | 0  | 0  | 0 | 0  | 0 | 0 | 0  | 0  | 0 | 0 | 0 | 0 | 0 | 0 | 0 | 0 | 0 | 1 | 0  |  |
|                                                                                                                                                                                                                      | 0  | 0   | 0  | 0 | 0 | 0 | 0  | 17 | 0  | 0 | 0  | 0 | 0 | 0  | 0  | 0 | 0 | 0 | 0 | 0 | 0 | 0 | 0 | 0 | 0 | 0  |  |
|                                                                                                                                                                                                                      | 0  | 20  | 0  | 0 | 0 | 0 | 0  | 0  | 0  | 0 | 0  | 0 | 0 | 20 | 0  | 0 | 0 | 0 | 0 | 0 | 0 | 0 | 0 | 0 | 0 | 0  |  |
|                                                                                                                                                                                                                      | 0  | 0   | 0  | 0 | 0 | 0 | 19 | 0  | 0  | 0 | 0  | 0 | 0 | 0  | 0  | 0 | 0 | 0 | 0 | 0 | 0 | 0 | 0 | 0 | 0 |    |  |
| M02255_77_000000000-ADUT3_1_1117_6754_11993 T---AC---GT-AG-GGA-----GCA-A-G-----C--G--T---T--AT-C-CGG-AT-----TT-A--C-T-GG-GT-----GT--A----AA-GG-GC-GT-----G-TA-G-G-C-G-----G--G-AG-T-G-C-----                         |    |     |    |   |   |   |    |    |    |   |    |   |   |    |    |   |   |   |   |   |   |   |   |   |   |    |  |
| AA---G-T-C-A-----G-A-T--G--TG--A-AA-AC--T-A-TG-G-G----CT-C-AA-----C-C-C-A-T-A-G--C-C---T-G--C-A--T--T-----T-GA-A-A--C-----T-G-T-AC--T-T-C---T-T-G-A-G-T-A--C-TG----GA-G-A-----G-G-C-A--GG-C----GG--A--ATT---C-C-G-   |    |     |    |   |   |   |    |    |    |   |    |   |   |    |    |   |   |   |   |   |   |   |   |   |   |    |  |
| T-GT--GT-A-G-CG-GT--G--A-A-A---TG-C-GT-AG--AT-A-TA--C-G--G-A-G-G-A-AC-A-CC---AG-T--G--GC-GAA-G--G-C-G-----G--C-C-T-G---CTG--G--AC-A-G-----C-A--A-C-T--GA--CG-C-T-G--A-GG--C-G-CG-A--AA-G-C--G-TG--GG-G--             |    |     |    |   |   |   |    |    |    |   |    |   |   |    |    |   |   |   |   |   |   |   |   |   |   |    |  |
| AG-C-A-AA-----CA--GG Bacteria(100);Firmicutes(100);Clostridia(100);Clostridiales(100);Ruminococcaceae(100);Incertae_Sedis(100);unclassified(100);unclassified(100);unclassified(100);                                |    |     |    |   |   |   |    |    |    |   |    |   |   |    |    |   |   |   |   |   |   |   |   |   |   |    |  |



|                                                                                                                                                                                                                         |    |    |   |   |    |   |    |   |    |    |    |   |    |    |    |   |   |   |   |   |   |   |   |    |   |   |   |
|-------------------------------------------------------------------------------------------------------------------------------------------------------------------------------------------------------------------------|----|----|---|---|----|---|----|---|----|----|----|---|----|----|----|---|---|---|---|---|---|---|---|----|---|---|---|
| Otu0535                                                                                                                                                                                                                 | 0  | 0  | 0 | 0 | 0  | 0 | 0  | 0 | 0  | 0  | 0  | 0 | 0  | 0  | 0  | 0 | 0 | 0 | 0 | 0 | 0 | 0 | 0 | 0  | 0 | 0 | 0 |
| 2                                                                                                                                                                                                                       | 0  | 0  | 0 | 0 | 1  | 0 | 0  | 0 | 0  | 0  | 0  | 0 | 27 | 20 | 0  | 0 | 0 | 0 | 0 | 0 | 0 | 0 | 0 | 8  | 0 | 0 | 0 |
| 0                                                                                                                                                                                                                       | 0  | 0  | 0 | 0 | 0  | 0 | 0  | 0 | 0  | 0  | 0  | 0 | 0  | 0  | 0  | 0 | 0 | 0 | 0 | 0 | 0 | 0 | 0 | 0  | 0 | 0 |   |
| 0                                                                                                                                                                                                                       | 0  | 0  | 0 | 0 | 0  | 0 | 0  | 0 | 0  | 0  | 0  | 0 | 0  | 0  | 0  | 0 | 0 | 0 | 0 | 0 | 0 | 0 | 0 | 0  | 0 | 0 |   |
| M02255_77_000000000-ADUT3_1_1103_6810_21124 T---AC---GT-AG-GGG-----GCA-A-G-----C--G--T---T--AT-C-CGG-AT-----TT-A--C-T--GG-GT-----GT--A----AA-GG-GA-GC-----G-TA-G-A-C-G-----G--A-CG-G-G-C-----                           |    |    |   |   |    |   |    |   |    |    |    |   |    |    |    |   |   |   |   |   |   |   |   |    |   |   |   |
| AA---G-T-C-T-----G-A-A--G-TG--A-AA-GG--C-A-GG-G-G----CT-C-AA-----C-C-C-C-T-G-G-A-C---T-G-C-T---T-T-----G--GA-A-A--C-----T--G-T-CC--A-T-C---T-A-G-A-G-T--G---C-CG-----GA-G-A-----G-G-T-A--AG-C-----GG--A--ATT---C-C-T-   |    |    |   |   |    |   |    |   |    |    |    |   |    |    |    |   |   |   |   |   |   |   |   |    |   |   |   |
| A-GT--GT-A-G-CG-GT--G---A--A-A--TG-C-GT-AG--AT-A-TT--A-G--G-A-G-G-A-AC-A-CC--AG--T--G--GC-GAA-G--G-C--G-----G--C-T-T-A--CTG--G--AC-G-G-----T-A--A-C-T--GA--AG-T-T-G--A-GG--C-T-CG-A--AA-G-C---G-TG--GG-G--              |    |    |   |   |    |   |    |   |    |    |    |   |    |    |    |   |   |   |   |   |   |   |   |    |   |   |   |
| AG-C-A-AA-----CA--GG Bacteria(100);Firmicutes(100);Clostridia(100);Clostridiales(100);Lachnospiraceae(100);unclassified(100);unclassified(100);unclassified(100);unclassified(100);                                     |    |    |   |   |    |   |    |   |    |    |    |   |    |    |    |   |   |   |   |   |   |   |   |    |   |   |   |
| Otu0536                                                                                                                                                                                                                 | 0  | 0  | 0 | 0 | 0  | 0 | 0  | 0 | 0  | 0  | 0  | 0 | 0  | 0  | 0  | 0 | 0 | 0 | 0 | 0 | 0 | 0 | 0 | 0  | 0 | 0 |   |
| 0                                                                                                                                                                                                                       | 0  | 0  | 0 | 0 | 0  | 0 | 0  | 0 | 0  | 38 | 0  | 0 | 0  | 0  | 0  | 0 | 0 | 0 | 0 | 0 | 0 | 0 | 0 | 0  | 0 | 0 |   |
| 0                                                                                                                                                                                                                       | 19 | 0  | 0 | 0 | 0  | 0 | 0  | 0 | 0  | 0  | 0  | 0 | 0  | 0  | 0  | 0 | 0 | 0 | 0 | 0 | 0 | 0 | 0 | 0  | 0 | 0 |   |
| 0                                                                                                                                                                                                                       | 0  | 0  | 0 | 0 | 0  | 0 | 0  | 0 | 0  | 0  | 0  | 0 | 0  | 0  | 0  | 0 | 0 | 0 | 0 | 0 | 0 | 0 | 0 | 0  | 0 | 0 |   |
| M02255_77_000000000-ADUT3_1_2112_16879_10346 T---AC---GG-AG-GGG-----GCT-A-G-----C--G--T---T--GT-T-CGG-AA-----TT-A--C-T--GG-GC-----GT--A----AA-GC-GC-AC-----G-TA-G-G-C-G-----G--C-TT-G-A-A-----                          |    |    |   |   |    |   |    |   |    |    |    |   |    |    |    |   |   |   |   |   |   |   |   |    |   |   |   |
| -----AA---G-T-T-G-----G-G-G--G-TG--A-AA-GC--C-C-GG-A-G----CT-C-AA-----C-T-C-C-G-G-A-A-T---T-G-C-C---T-T-----C--AA-A-A--C-----T--C-T-CA--A-G-C---T-G-G-A-G-T--T---C-GG-----AA-G-A-----G-G-A-G--AG-T-----GG--A--ATT---    |    |    |   |   |    |   |    |   |    |    |    |   |    |    |    |   |   |   |   |   |   |   |   |    |   |   |   |
| C-C-C-A-GT--GT-A-G-AG-GT--G---A--A-A--TT-C-GT-AG--AT-A-TT--G-G--G-A-A-G-A-AC-A-CC--AG--T--G--GC-GAA-G--G-C--G-----G--C-T-C-T--CTG--G--TC-C-G-----A-T--A-C-T--GA--CG-C-T-G--A-GG--T-G-CG-A--AA-G-C---G-TG--GG-           |    |    |   |   |    |   |    |   |    |    |    |   |    |    |    |   |   |   |   |   |   |   |   |    |   |   |   |
| G--AG-C-A-AA-----CA--GG Bacteria(100);Proteobacteria(100);Alphaproteobacteria(100);unclassified(100);unclassified(100);unclassified(100);unclassified(100);unclassified(100);unclassified(100);                         |    |    |   |   |    |   |    |   |    |    |    |   |    |    |    |   |   |   |   |   |   |   |   |    |   |   |   |
| Otu0537                                                                                                                                                                                                                 | 0  | 0  | 0 | 0 | 0  | 0 | 0  | 0 | 0  | 0  | 0  | 0 | 0  | 0  | 0  | 0 | 0 | 0 | 0 | 0 | 0 | 0 | 0 | 0  | 0 | 0 |   |
| 0                                                                                                                                                                                                                       | 0  | 0  | 0 | 0 | 0  | 0 | 0  | 0 | 0  | 0  | 24 | 0 | 0  | 0  | 0  | 0 | 0 | 0 | 0 | 0 | 0 | 0 | 0 | 17 | 0 | 0 |   |
| 0                                                                                                                                                                                                                       | 0  | 0  | 0 | 0 | 0  | 0 | 0  | 0 | 0  | 0  | 0  | 0 | 0  | 0  | 0  | 0 | 0 | 0 | 0 | 0 | 0 | 0 | 0 | 0  | 0 | 0 |   |
| 0                                                                                                                                                                                                                       | 0  | 0  | 0 | 0 | 0  | 0 | 0  | 0 | 0  | 0  | 0  | 0 | 0  | 0  | 0  | 0 | 0 | 0 | 0 | 0 | 0 | 0 | 0 | 0  | 0 | 0 |   |
| M02255_77_000000000-ADUT3_1_1103_18659_19897 T---AC---GT-AG-GAC-----CCA-A-G-----C--G--T---T--AT-C-CGG-AG-----TG-A--C-T--GG-GC-----GT--A----AA-GA-GTTGC-----G-TA-G-G-C-G-----G--C-TT-A-A-T-----                          |    |    |   |   |    |   |    |   |    |    |    |   |    |    |    |   |   |   |   |   |   |   |   |    |   |   |   |
| -----AA---G-T-T-G-----A-T-A--G-TG--A-AA-CC--T-G-GT-G-G----CT-C-AA-----C-C-A-TAC-A-G-A-C---T-A-T-T--A-T-----C--CA-A-A--C-----T--G-T-TA--A-G-C---T-C-G-A-G-A--A--T-GG-----TA-G-A-----G-G-T-G--GC-T-----GG--A--ATT---T-    |    |    |   |   |    |   |    |   |    |    |    |   |    |    |    |   |   |   |   |   |   |   |   |    |   |   |   |
| C-T-A-GT--GT-A-G-GA-GT--G---A--A-A--TC-C-GT-AG--AT-A-TT--A-G--A-A-G-G-A-AC-A-CC--GA--T--G--GC-GTA-G--G-C--A-----G--G-C-C-A--CTG--G--AC-C-A-----T-T---T-C-T--GA--CG-C-T-A--A-GG--C-A-CG-A--AA-G-C---G-TG--GG-G-          |    |    |   |   |    |   |    |   |    |    |    |   |    |    |    |   |   |   |   |   |   |   |   |    |   |   |   |
| -AG-C-G-AA-----CC--GG Bacteria(100);Candidate_division_TM7(100);unclassified(100);unclassified(100);unclassified(100);unclassified(100);unclassified(100);unclassified(100);unclassified(100);                          |    |    |   |   |    |   |    |   |    |    |    |   |    |    |    |   |   |   |   |   |   |   |   |    |   |   |   |
| Otu0538                                                                                                                                                                                                                 | 0  | 94 | 0 | 0 | 0  | 0 | 32 | 1 | 0  | 0  | 0  | 0 | 0  | 0  | 0  | 0 | 0 | 0 | 0 | 0 | 0 | 0 | 0 | 0  | 0 | 0 |   |
| 0                                                                                                                                                                                                                       | 0  | 0  | 0 | 0 | 0  | 0 | 0  | 0 | 0  | 0  | 81 | 0 | 0  | 0  | 0  | 0 | 0 | 0 | 0 | 0 | 0 | 0 | 0 | 0  | 0 | 0 |   |
| 0                                                                                                                                                                                                                       | 0  | 0  | 0 | 0 | 0  | 0 | 0  | 0 | 0  | 0  | 0  | 0 | 0  | 0  | 0  | 0 | 0 | 0 | 0 | 0 | 0 | 0 | 0 | 0  | 0 | 0 |   |
| 0                                                                                                                                                                                                                       | 0  | 0  | 0 | 0 | 0  | 0 | 0  | 0 | 0  | 0  | 0  | 0 | 0  | 0  | 0  | 0 | 0 | 0 | 0 | 0 | 0 | 0 | 0 | 0  | 0 | 0 |   |
| M02255_77_000000000-ADUT3_1_1104_25878_15560 T---AC---GT-AT-GGT-----GCA-A-G-----C--G--T---T--AT-C-CGG-AT-----TT-A--C-T--GG-GT-----GT--A----AA-GG-GA-GC-----G-CA-G-G-C-G-----G--T-TT-G-G-C-----                          |    |    |   |   |    |   |    |   |    |    |    |   |    |    |    |   |   |   |   |   |   |   |   |    |   |   |   |
| -----AA---G-T-C-T-----G-A-T--G-TG--A-AA-AT--C-C-GG-G-G----CT-C-AA-----C-T-C-C-G-G-A--A-C---T-G--C-A--T-T-----G--GA-A-A--C-----T--G-T-CA--G-A-C---T-A-G-A-G-T--G---T-CG-----GA-G-A-----G-G-T-A--AG-T-----GG--A--ATT---C- |    |    |   |   |    |   |    |   |    |    |    |   |    |    |    |   |   |   |   |   |   |   |   |    |   |   |   |
| C-T-A-GT--GT-A-G-CG-GT--G---A--A-A--TG-C-GT-AG--AT-A-TT--A-G--G-A-G-G-A-AC-A-CC--AG--T--G--GC-GAA-G--G-C--G-----G--C-T-T-A--CTG--G--AC-G-A-----T-A--A-C-T--GA--CG-C-T-G--A-GG--C-T-CG-A--AA-G-C---G-TG--GG-             |    |    |   |   |    |   |    |   |    |    |    |   |    |    |    |   |   |   |   |   |   |   |   |    |   |   |   |
| G--AG-C-A-AA-----CA--GG Bacteria(100);Firmicutes(100);Clostridia(100);Clostridiales(100);Lachnospiraceae(100);unclassified(100);unclassified(100);unclassified(100);unclassified(100);                                  |    |    |   |   |    |   |    |   |    |    |    |   |    |    |    |   |   |   |   |   |   |   |   |    |   |   |   |
| Otu0539                                                                                                                                                                                                                 | 0  | 0  | 0 | 0 | 0  | 0 | 0  | 0 | 0  | 0  | 0  | 0 | 0  | 0  | 0  | 0 | 0 | 0 | 0 | 0 | 0 | 0 | 0 | 0  | 0 | 0 |   |
| 0                                                                                                                                                                                                                       | 0  | 0  | 0 | 0 | 0  | 0 | 0  | 0 | 0  | 0  | 0  | 0 | 0  | 0  | 0  | 0 | 0 | 0 | 0 | 0 | 0 | 0 | 0 | 0  | 0 | 0 |   |
| 0                                                                                                                                                                                                                       | 6  | 0  | 0 | 0 | 0  | 0 | 0  | 0 | 0  | 0  | 0  | 0 | 0  | 15 | 20 | 0 | 0 | 0 | 0 | 0 | 0 | 0 | 0 | 0  | 0 | 0 |   |
| 0                                                                                                                                                                                                                       | 0  | 0  | 0 | 6 | 18 | 0 | 0  | 0 | 31 | 0  | 5  | 0 | 0  | 0  | 0  | 0 | 0 | 0 | 0 | 0 | 0 | 0 | 0 | 0  | 0 | 0 |   |
| M02255_77_000000000-ADUT3_1_2112_14015_9545 T---AC---GT-GC-CAG-----CAGCC-G-----CG-G--T---A--AT-A-CGT-AG-----GT-G--G-C--GA-GC-----GTT--AT---CC-GGAAT-TA-----T-TG-G-G-C-G-----G--T-CT-G-T-T-----                          |    |    |   |   |    |   |    |   |    |    |    |   |    |    |    |   |   |   |   |   |   |   |   |    |   |   |   |
| AA---G-T-T-C-----A-T-G--G-TC--A-AA-TT--G-T-GG-G-G----CT-C-AA-----C-C-C-C-A-T-C--G-----C-G--C-C--A-T-----G--GA-T-A--C-----T--G-G-CA--G-A-C---T-A-G-A-G-T--A--T-TG-----GA-G-A-----G-G-C-A--AG-T-----GG--A--ATT---C-C-A-   |    |    |   |   |    |   |    |   |    |    |    |   |    |    |    |   |   |   |   |   |   |   |   |    |   |   |   |
| T-GT--GT-A-G-CG-GT--A---A--A-A--TG-C-GT-AG--AT-A-TA--T-G--G-A-G-G-A-AC-A-CC--GG--T--G--GC-GAA-G--G-C--G-----A--C-T-T-G---CTA--G--CC-A-A-----A-G--A-C-T--GA--CG-C-T-G--A-GG--C-A-CG-A--AA-G-C---G-TG--GG-G--             |    |    |   |   |    |   |    |   |    |    |    |   |    |    |    |   |   |   |   |   |   |   |   |    |   |   |   |
| AG-C-A-AA-----TA--GG Bacteria(100);Firmicutes(100);Erysipelotrichi(100);Erysipelotrichales(100);Erysipelotrichaceae(100);Bulleidia(100);unclassified(100);unclassified(100);unclassified(100);                          |    |    |   |   |    |   |    |   |    |    |    |   |    |    |    |   |   |   |   |   |   |   |   |    |   |   |   |



|                                                                                                                                                                                                                            |   |   |   |    |    |    |    |    |   |    |    |   |   |   |    |   |   |     |   |   |     |   |   |    |   |   |   |    |
|----------------------------------------------------------------------------------------------------------------------------------------------------------------------------------------------------------------------------|---|---|---|----|----|----|----|----|---|----|----|---|---|---|----|---|---|-----|---|---|-----|---|---|----|---|---|---|----|
| Otu0540                                                                                                                                                                                                                    | 0 | 0 | 0 | 0  | 0  | 0  | 0  | 0  | 0 | 0  | 0  | 0 | 0 | 0 | 0  | 0 | 0 | 0   | 0 | 0 | 0   | 0 | 0 | 9  | 0 | 0 | 0 | 0  |
|                                                                                                                                                                                                                            | 0 | 0 | 0 | 0  | 0  | 0  | 0  | 0  | 0 | 0  | 0  | 0 | 0 | 0 | 0  | 0 | 0 | 0   | 0 | 0 | 0   | 0 | 0 | 15 | 0 | 0 | 0 | 0  |
|                                                                                                                                                                                                                            | 0 | 0 | 0 | 0  | 0  | 0  | 0  | 0  | 0 | 0  | 0  | 0 | 0 | 0 | 0  | 0 | 0 | 0   | 0 | 0 | 0   | 0 | 0 | 0  | 0 | 0 | 0 | 0  |
|                                                                                                                                                                                                                            | 0 | 0 | 0 | 0  | 0  | 0  | 0  | 0  | 0 | 0  | 0  | 0 | 0 | 0 | 0  | 0 | 0 | 0   | 0 | 0 | 0   | 0 | 0 | 0  | 0 | 0 |   |    |
| M02255_77_000000000-ADUT3_1_1101_21294_12063 T---AC---GA-AG-GGG-----GCT-A-G-----C-G-T---T--GT-T-CGG-AA-----TT-A--C-T--GG-GC-----GT--A----AA-GC-GC-AC-----G-TA-G-G-C-G-----G--A-CA-T-T-T-----                               |   |   |   |    |    |    |    |    |   |    |    |   |   |   |    |   |   |     |   |   |     |   |   |    |   |   |   |    |
| -----AA---G-T-C-A-----G-G-G--G--TG--A-AA-TC--C-C-GG-G-G----CT-C-AA-----C-C-C-C-G-G-A-A-C---T-G-C-C---T-T-----T--GA-T-A--C-----T--G-G--GT--G-T-C---T-T-G-A-G-T--G---T-GG-----AA-G-A-----G-G-T-C---GG-T-----GG--A--ATT----   |   |   |   |    |    |    |    |    |   |    |    |   |   |   |    |   |   |     |   |   |     |   |   |    |   |   |   |    |
| G-C-G-A-GT--GT-A-G-AG-GT--G---A--A-A---TT-C-GT-AG--AT-A-TT--C-G--C-A-G-G-A-AC-A-CC---AG--T--G--GC-GAA-G--G-C--G-----G--C-C-G-A---CTG--G--TC-C-A-----T-T---A-C-T--GA--CG-C-T-G--A-GG--T-G-CG-A--AA-G-C---G-TG--GG-          |   |   |   |    |    |    |    |    |   |    |    |   |   |   |    |   |   |     |   |   |     |   |   |    |   |   |   |    |
| G--AG-C-A-AA-----CA--GG Bacteria(100);Proteobacteria(100);Alphaproteobacteria(100);Rhizobiales(100);unclassified(100);unclassified(100);unclassified(100);unclassified(100);unclassified(100);                             |   |   |   |    |    |    |    |    |   |    |    |   |   |   |    |   |   |     |   |   |     |   |   |    |   |   |   |    |
| Otu0541                                                                                                                                                                                                                    | 0 | 0 | 0 | 0  | 0  | 0  | 0  | 0  | 0 | 0  | 0  | 0 | 0 | 0 | 0  | 0 | 0 | 0   | 0 | 0 | 0   | 0 | 0 | 0  | 0 | 0 | 0 | 0  |
|                                                                                                                                                                                                                            | 0 | 0 | 0 | 0  | 0  | 0  | 0  | 0  | 0 | 0  | 0  | 0 | 0 | 0 | 0  | 0 | 0 | 0   | 0 | 0 | 0   | 0 | 0 | 0  | 0 | 0 | 0 | 0  |
|                                                                                                                                                                                                                            | 0 | 8 | 0 | 0  | 0  | 0  | 0  | 0  | 0 | 0  | 0  | 0 | 0 | 0 | 0  | 0 | 0 | 0   | 0 | 0 | 0   | 0 | 0 | 0  | 0 | 0 | 0 | 19 |
|                                                                                                                                                                                                                            | 0 | 0 | 0 | 0  | 0  | 0  | 0  | 0  | 0 | 0  | 12 | 0 | 0 | 0 | 0  | 0 | 0 | 0   | 0 | 0 | 0   | 0 | 0 | 0  | 0 | 0 | 0 | 0  |
| M02255_76_000000000-ADUNE_1_1103_18938_18238 C---GG---CT-AA-CT-----ACG-T-G-----C--C--A--G--CA-G-CCG-CG-----GT-A--A-T--AC-GT-----AG--G----TC-AC-AA-GC-----G-TT-GTC-C-G-----G--A-TT-G-T-T-----                               |   |   |   |    |    |    |    |    |   |    |    |   |   |   |    |   |   |     |   |   |     |   |   |    |   |   |   |    |
| ---AA---G-T-C-T-----G-A-T--G--TG--A-AA-GC--C-C-AC-G-G----CT-C-AA-----C-C-G-T-G-G-A--A---C-GG-C-A---T-T-----G--GA-A-A--C-----T--G-G--CA--A-A-C---T-T-G-A-G-T--A---T-AG-----AA-G-A-----G-G-A-A---AG-T-----GG--A--ATT---C-    |   |   |   |    |    |    |    |    |   |    |    |   |   |   |    |   |   |     |   |   |     |   |   |    |   |   |   |    |
| C-A-T-GT--GT-A-G-CG-GT--G---A--A-A---TG-C-GT-AG--AT-A-TA--T-G--G-A-G-G-A-AC-A-CC---AG--T--G--GC-GAA-G--G-C--G-----A--C-T-T-T---CTG--G--TC-T-A-----T-A---A-C-T--GA--CG-C-T-G--A-GG--C-T-CG-A--AA-G-C---G-TG--GG-G--         |   |   |   |    |    |    |    |    |   |    |    |   |   |   |    |   |   |     |   |   |     |   |   |    |   |   |   |    |
| AG-C-G-AA-----CA--GG Bacteria(100);Firmicutes(100);Bacilli(100);Lactobacillales(100);Aerococcaceae(100);Flacklamia(100);unclassified(100);unclassified(100);unclassified(100);                                             |   |   |   |    |    |    |    |    |   |    |    |   |   |   |    |   |   |     |   |   |     |   |   |    |   |   |   |    |
| Otu0542                                                                                                                                                                                                                    | 0 | 0 | 0 | 0  | 0  | 0  | 0  | 0  | 0 | 0  | 0  | 0 | 0 | 0 | 0  | 0 | 0 | 0   | 0 | 0 | 0   | 0 | 0 | 0  | 0 | 0 | 0 | 0  |
|                                                                                                                                                                                                                            | 0 | 0 | 0 | 0  | 0  | 53 | 0  | 75 | 0 | 0  | 0  | 0 | 0 | 0 | 0  | 0 | 0 | 0   | 0 | 0 | 0   | 0 | 0 | 0  | 0 | 0 | 0 | 0  |
|                                                                                                                                                                                                                            | 0 | 0 | 0 | 0  | 0  | 0  | 0  | 0  | 0 | 0  | 0  | 0 | 0 | 0 | 0  | 0 | 0 | 0   | 0 | 0 | 0   | 0 | 0 | 0  | 0 | 0 | 0 | 0  |
|                                                                                                                                                                                                                            | 0 | 0 | 0 | 0  | 0  | 0  | 0  | 0  | 0 | 0  | 0  | 0 | 0 | 0 | 0  | 0 | 0 | 0   | 0 | 0 | 0   | 0 | 0 | 0  | 0 | 0 |   |    |
| M02255_77_000000000-ADUT3_1_1111_14882_9688 T---AC---GA-AG-GGG-----GCT-A-G-----C--G-T---T--GT-T-CGG-AA-----TC-A--C-T--GG-GC-----GT--A----AA-GA-GC-AC-----G-TA-G-G-C-G-----G--A-CT-T-G-T-----TA-                            |   |   |   |    |    |    |    |    |   |    |    |   |   |   |    |   |   |     |   |   |     |   |   |    |   |   |   |    |
| ---G-T-C-A-----G-G-G--G--TG--A-AA-TC--C-C-GG-G-G----CT-C-AA-----C-C-C-C-G-G-A-A-C---T-G--C-C---C--T-----T--GA-A-A--C-----T--G-C--AA--G-T-C---T-T-G-A-G-T--C---C-GA---GA-G-A-----G-G-T-G---AG-T-----GG--A--ATT---C-C-T-A-   |   |   |   |    |    |    |    |    |   |    |    |   |   |   |    |   |   |     |   |   |     |   |   |    |   |   |   |    |
| GT--GT-A-G-AG-GT--G---A--A-A---TT-C-GT-AG--AT-A-TT--A-G--G-A-A-G-A-AC-A-CC---AG--T--G--GC-GAA-G--G-C--G-----G--C-T-C-A---CTG--G--CT-C-G-----G-T---A-C-T--GA--CG-C-T-G--A-GG--T-G-CG-A--AA-G-C---G-TG--GG-G--AG-            |   |   |   |    |    |    |    |    |   |    |    |   |   |   |    |   |   |     |   |   |     |   |   |    |   |   |   |    |
| C-A-AA-----CA--GG Bacteria(100);Proteobacteria(100);Alphaproteobacteria(100);unclassified(100);unclassified(100);unclassified(100);unclassified(100);unclassified(100);unclassified(100);                                  |   |   |   |    |    |    |    |    |   |    |    |   |   |   |    |   |   |     |   |   |     |   |   |    |   |   |   |    |
| Otu0543                                                                                                                                                                                                                    | 0 | 0 | 0 | 0  | 0  | 0  | 0  | 0  | 0 | 0  | 0  | 0 | 0 | 0 | 0  | 0 | 0 | 0   | 0 | 0 | 0   | 0 | 0 | 0  | 0 | 0 | 0 | 0  |
|                                                                                                                                                                                                                            | 0 | 0 | 0 | 0  | 0  | 0  | 20 | 0  | 0 | 9  | 14 | 0 | 0 | 0 | 0  | 0 | 0 | 0   | 0 | 0 | 0   | 0 | 0 | 0  | 0 | 0 | 0 | 0  |
|                                                                                                                                                                                                                            | 0 | 0 | 0 | 0  | 0  | 0  | 0  | 0  | 0 | 0  | 0  | 0 | 0 | 0 | 0  | 0 | 0 | 0   | 0 | 0 | 0   | 0 | 0 | 0  | 0 | 0 | 0 | 0  |
|                                                                                                                                                                                                                            | 0 | 0 | 0 | 0  | 0  | 0  | 0  | 0  | 0 | 0  | 0  | 0 | 0 | 0 | 0  | 0 | 0 | 0   | 0 | 0 | 0   | 0 | 0 | 0  | 0 | 0 |   |    |
| M02255_77_000000000-ADUT3_1_2111_24375_7657 T---AC---GG-GG-GGG-----GCA-A-G-----C--G-T---T--GT-T-CGG-AA-----TT-A--C-T--GG-GC-----GT--A----AA-GG-GT-GC-----G-TA-G-G-C-G-----G--C-TC-T-C-T-----                               |   |   |   |    |    |    |    |    |   |    |    |   |   |   |    |   |   |     |   |   |     |   |   |    |   |   |   |    |
| AA---G-T-C-G-----G-A-T--G--TG--A-AA-AC--T-C-TG-G-G----CT-C-AA-----C-C-C-A-G-A-G--C-C---T-G--C-A---T--C-----T--GA-A-A--C-----T--G-G--AG--G-G-C---T-A-G-G-G-T--T---C-TG---GA-G-G-----G-G-A-A---AG-C-----GG--A--ATT---C-C-    |   |   |   |    |    |    |    |    |   |    |    |   |   |   |    |   |   |     |   |   |     |   |   |    |   |   |   |    |
| T-G-GT--GT-A-G-CG-GT--G---A--A-A---TG-C-GT-AG--AT-A-TC--A-G--G-A-G-G-A-AC-A-CC---GG--T--G--GC-GAA-G--G-C--G-----G--C-T-T-T---CTG--G--AC-A-G-----A-T---A-C-C--GA--CG-C-T-G--A-GG--C-A-CG-A--AA-G-C---T-AG--GG-G--           |   |   |   |    |    |    |    |    |   |    |    |   |   |   |    |   |   |     |   |   |     |   |   |    |   |   |   |    |
| AG-C-A-AA-----CA--GG Bacteria(100);unclassified(54);unclassified(54);unclassified(54);unclassified(54);unclassified(54);unclassified(54);unclassified(54);unclassified(54);                                                |   |   |   |    |    |    |    |    |   |    |    |   |   |   |    |   |   |     |   |   |     |   |   |    |   |   |   |    |
| Otu0544                                                                                                                                                                                                                    | 0 | 0 | 0 | 0  | 0  | 0  | 0  | 0  | 0 | 0  | 0  | 0 | 0 | 0 | 0  | 0 | 0 | 0   | 0 | 0 | 0   | 0 | 0 | 0  | 0 | 0 | 0 | 0  |
|                                                                                                                                                                                                                            | 0 | 0 | 0 | 73 | 0  | 0  | 0  | 0  | 0 | 0  | 0  | 0 | 0 | 0 | 95 | 0 | 0 | 0   | 0 | 0 | 0   | 0 | 1 | 0  | 0 | 0 | 0 | 0  |
|                                                                                                                                                                                                                            | 0 | 0 | 0 | 0  | 0  | 0  | 0  | 0  | 0 | 8  | 4  | 0 | 0 | 0 | 0  | 0 | 0 | 116 | 0 | 0 | 0   | 0 | 0 | 0  | 0 | 0 | 0 | 0  |
|                                                                                                                                                                                                                            | 0 | 0 | 0 | 0  | 60 | 0  | 2  | 0  | 0 | 51 | 0  | 0 | 0 | 0 | 0  | 0 | 0 | 0   | 0 | 0 | 227 | 0 | 0 | 0  | 0 | 0 |   |    |
| M02255_77_000000000-ADUT3_1_1105_12267_14903 T---AC---GT-AG-GTG-----GCA-A-G-----C--G-T---T--AT-C-CGG-AT-----TT-A--C-T--GG-GT-----GT--A----AA-GG-GC-GT-----G-TA-G-G-C-G-----G--A-TT-C-T-C-----                              |   |   |   |    |    |    |    |    |   |    |    |   |   |   |    |   |   |     |   |   |     |   |   |    |   |   |   |    |
| -----AA---G-T-T-G-----G-A-T--G--TG--A-AA-CC--C-C-TT-G-G----CT-A-AA-----C-T-A-A-G-G-G--C-T---T-G--C-A---T--T-----C--AA-A-A--C-----T--G-A--GG--A-C-C---T-T-G-A-G-T--A---T-CA---GA-G-G-----G-G-A-A---AG-T-----GG--A--ATT---C- |   |   |   |    |    |    |    |    |   |    |    |   |   |   |    |   |   |     |   |   |     |   |   |    |   |   |   |    |
| C-T-G-GT--GG-A-G-CG-GT--A---A--A-A---TG-C-GT-AG--AG-A-TC--A-G--G-A-G-G-A-AC-A-CC---GG--T--G--GC-GAA-G--G-C--G-----A--C-T-T-T---CTG--G--CT-G-A-----T-A---A-C-T--GA--CG-C-T-G--A-GG--C-G-CG-A--AA-G-C---G-TG--GG-            |   |   |   |    |    |    |    |    |   |    |    |   |   |   |    |   |   |     |   |   |     |   |   |    |   |   |   |    |
| G--AG-C-A-AA-----CA--GG Bacteria(100);Firmicutes(100);Clostridia(100);Clostridiales(100);Ruminococcaceae(100);Fastidiosipila(100);unclassified(100);unclassified(100);unclassified(100);                                   |   |   |   |    |    |    |    |    |   |    |    |   |   |   |    |   |   |     |   |   |     |   |   |    |   |   |   |    |



Otu0545      0      0      0      0      0      0      0      0      0      0      0      0      0      0      0      0      0      0      0      0      0      0      0      0      0      0      7      0  
0      0      0      0      0      0      0      0      0      0      0      0      0      0      0      0      0      0      0      0      0      0      0      0      0      0      0      0      0  
0      0      0      0      0      0      0      0      0      0      0      0      0      0      14      0      0      0      0      0      0      0      0      0      0      0      0      0      0  
0      0      0      0      0      0      0      0      0      0      0      0      0      0      0      0      0      0      0      0      0      0      0      0      0      0      0      0  
M02255\_77\_000000000-ADUT3\_1\_1104\_7397\_7653    T---AC---GG-AG-AGG-----GCT-A-G-----C--G--T---T--AT-T-CGG-AA-----TT-A--T-T--GG-GC-----GT--A----AA-GG-GC-GC-----G-TA-G-G-C-G-----G--A-TT-A-G-T-----  
AA---G-T-T-A-----A-A-A--G-TG--A-AA-TC--C-C-AA-G-G-----CT-C-AA-----C-C-T-T-G-G-A--A-T---T-G--C-T---T--T-----T--AA-A-A---C-----T--G-C--TA-A-T-C---T-A-G-A-G-A--T---T-GA-----AA-G-A-----G-G-A-T---AG-A-----GG--A--ATT---C-C-T-  
A-GT--GT-A-G-AG-GT--G---A--A-A---TT-C-GT-AA--AT-A-TT--A-G--G-A-G-G-A-AC-A-CC---AG--T--G--GC-GAA-G--G-C-G-----T--C-T-A-T---CTG--G--TT-C-A-----A-A---T-C-T--GA-CG-C-T-G--A-GG--C-G-CG-A--AG-G-C---G-TG--GG-G--AG-  
C-A-AA-----CA--GG    Bacteria(100);Proteobacteria(100);Alphaproteobacteria(100);Rickettsiales(100);Anaplasmataceae(100);Wolbachia(100);unclassified(100);unclassified(100);unclassified(100);

Otu0546      0      0      0      0      0      0      0      0      0      0      0      0      0      0      0      0      0      0      0      0      0      0      0      28      0      0      0      0      0  
0      0      0      0      0      0      0      82      0      0      0      0      0      0      0      0      0      0      0      0      0      0      0      0      0      0      0      0      0      0  
0      0      0      0      0      0      0      0      0      0      0      0      0      0      13      0      0      0      0      0      0      0      0      0      0      0      0      0      0      0  
0      0      0      0      0      0      0      0      0      0      0      0      0      0      0      0      0      0      0      0      0      0      0      0      0      0      0      0  
M02255\_77\_000000000-ADUT3\_1\_1112\_13640\_14634    T---AC---GG-AG-GGG-----GCT-A-G-----C--G--T---T--GT-T-CGG-AA-----TC-A--C-T--GG-GC-----GT--A----AA-GC-GC-AC-----G-TA-G-G-C-G-----G--C-GA-T-C-T-----  
-----AA---G-T-C-A-----G-A-G--G--TG--A-AA-GC--C-C-GG-G-G-----CT-C-AA-----C-C-C-C-G-G-A--A-T---T-G--C-C---T--T-----T--GA-G-A---C-----T--G-G--AT--T-G-C---T-T-G-A-A-C--G---T-CG---GA-G-A-----G-G-T-G---GG-T-----GG--A--ATT---  
C-C-G-A-GT--GT-A-G-AG-GT--G---A--A-A---TT-C-GT-AG--AT-A-TT--C-G--G-A-A-G-A-AC-A-CC---AG--T--G--GC-GAA-G--G-C-G-----G--C-C-C-A---CTG--G--AC-G-A-----C-T---G-T-T--GA--CG-C-T-G--A-GG--T-G-CG-A--AA-G-C---G-TG--  
GG-G--AG-C-A-AA-----CA--GG    Bacteria(100);Proteobacteria(100);Alphaproteobacteria(100);Sphingomonadales(100);Sphingomonadaceae(100);Sphingobium(90);unclassified(90);unclassified(90);unclassified(90);

Otu0547      0      0      0      0      0      0      0      0      0      0      0      0      0      0      0      0      0      0      0      0      0      0      0      0      0      0      0      0      0  
0      0      0      0      0      0      0      87      0      0      0      0      0      0      0      0      0      0      0      0      0      0      0      0      0      0      0      0      0      0  
0      0      0      0      0      0      0      0      0      0      0      0      0      0      0      0      0      0      0      0      0      0      0      0      0      0      0      0      0      0  
0      0      0      0      0      0      0      0      0      0      0      0      0      0      0      0      0      0      0      0      0      0      0      0      0      0      0      0  
M02255\_77\_000000000-ADUT3\_1\_2111\_24631\_9113    C---AC---GT-AG-GCA-----CCA-A-G-----C--G--T---T--GT-C-CGG-AT-----TT-A--T-T--GG-GC-----GT--A----AA-GA-GC-TT-----G-TA-G-G-C-G-----G--T-TC-G-G-C-----AA--  
--G-T-C-G-----G-G-T--G--TG--A-AA-AC--T-C-TG-G-G-----CT-C-AA-----C-T-C-A-G-A-G--A-----T-G-CC-A--C-C-----C--GA-T-A--C-----T--G-C--TG-TG-A-C---T-A-G-A-G-T-G---C-AG---TA-G-G-----G-G-A-G---CG-G-----GG--A--ATT---C-C-T-G-  
GT--GT-A-G-CG-GT--G---A--A-A---TG-C-GC-AG--AT-A-TC--A-G--G-A-G-G-A-AC-A-CC---AG--T--G--GC-GAA-G--G-C-G-----C--C-G-C-T---CTG--G--GC-T-G-----T-A---A-C-T--GA--CG-C-T-G--A-GA--A-G-CG-A--AA-G-C---G-TG--GG-T--AG-  
C-A-AA-----CA--GG    Bacteria(100);Actinobacteria(100);Actinobacteria(100);Acidimicrobidae(100);Acidimicrobiales(100);Acidimicrobineae(100);Acidimicrobiaceae(100);unclassified(100);unclassified(100);

Otu0548      0      0      0      0      0      0      0      0      0      0      0      0      0      0      0      0      0      0      0      0      0      0      0      0      0      0      0      0      0  
0      0      0      0      0      0      0      0      104      0      0      0      0      0      0      0      0      0      0      0      0      0      0      0      0      0      0      0      0      0  
0      0      0      0      0      0      0      0      0      0      0      0      0      0      0      23      0      0      0      0      0      0      0      0      0      0      0      0      0      0  
0      0      0      0      0      0      0      5      0      0      0      0      0      0      0      0      0      0      0      0      0      0      0      0      0      0      0      0  
M02255\_77\_000000000-ADUT3\_1\_1104\_28969\_16166    T---AC---GG-AG-GGG-----GCT-A-G-----C--G--T---T--GT-T-CGG-AA-----TT-A--C-T--GG-GC-----GT--A----AA-GC-GC-AC-----G-TA-G-G-C-G-----G--T-TT-T-G-C-----  
-----AA---G-T-C-A-----G-A-G--G--TG--A-AA-GC--C-C-GG-A-G-----CT-C-AA-----C-T-C-C-G-G-A--A-T---T-G--C-C---T--T-----T--GA-G-A---C-----T--G-C--AT--C-A-C---T-T-G-A-A-C--G---T-CG---GA-G-A-----G-G-T-G---AG-T-----GG--A--ATT---C-  
C-G-A-GT--GT-A-G-AG-GT--G---A--A-A---TT-C-GT-AG--AT-A-TT--C-G--G-A-A-G-A-AC-A-CC---AG--T--G--GC-GAA-G--G-C-G-----G--C-T-C-A---CTG--G--AC-G-A-----C-T---G-T-T--GA--CG-C-T-G--A-GG--T-G-CG-A--AA-G-C---G-TG--GG-  
G--AG-C-A-AA-----CA--GG    Bacteria(100);Proteobacteria(100);Alphaproteobacteria(100);Sphingomonadales(100);Sphingomonadaceae(100);Sphingomonas(100);unclassified(100);unclassified(100);unclassified(100);

Otu0549      0      0      0      0      0      0      0      0      0      0      0      0      0      0      0      0      0      0      0      0      0      0      0      0      0      0      0      0      0  
0      0      0      0      0      0      0      0      0      0      0      0      0      0      0      0      0      0      0      0      0      0      0      0      12      0      0      0      0      0  
0      0      0      0      0      0      0      0      0      0      0      0      0      0      0      25      0      0      0      0      0      0      0      0      0      0      0      0      0      0  
0      0      0      0      0      0      0      0      0      0      0      0      0      0      0      0      0      0      0      0      0      0      0      0      0      0      0      0  
M02255\_77\_000000000-ADUT3\_1\_1106\_16871\_21111    T---AC---GT-AG-GTG-----GCA-A-G-----C--G--T---T--AT-C-CGG-AT-----TT-A--C-T--GG-GT-----GT--A----AA-GG-GC-GT-----G-TA-G-G-C-G-----G--G-TC-T-G-C-----  
-----AA---G-T-C-A-----G-A-T--G--TG--A-AA-TC--T-C-CG-G-G-----CT-T-AA-----C-T-C-G-G-A-A--G-T---G-T--C-A---T--C-----T--GA-A-A---C-----T--A-C--GG--A-T-C---T-T-G-A-G-T-A--C-TG---GA-G-A-----G-G-A-T---AG-T-----GG--A--ATT---C-  
C-T-A-GT--GT-A-G-CG-GT--A---A--A-A---TG-C-GT-AG--AT-A-TT--A-G--G-A-G-G-A-AC-A-CC---AG--T--G--GC-GAA-G--G-C-G-----G--C-T-A-T---CTG--G--AC-A-G-----T-A---A-C-T--GA--CG-C-T-G--A-GG--C-G-CG-A--AA-G-C---G-TG--GG-  
G--AG-C-A-AA-----CA--GG    Bacteria(100);Firmicutes(100);Clostridia(100);Clostridiales(100);Ruminococcaceae(100);unclassified(68);unclassified(68);unclassified(68);unclassified(68);



|                                              |   |   |   |   |   |   |   |   |    |                                                                                                                                                                                                                          |    |   |   |   |   |    |    |   |     |   |   |   |   |    |   |   |   |
|----------------------------------------------|---|---|---|---|---|---|---|---|----|--------------------------------------------------------------------------------------------------------------------------------------------------------------------------------------------------------------------------|----|---|---|---|---|----|----|---|-----|---|---|---|---|----|---|---|---|
| Otu0550                                      | 0 | 0 | 0 | 0 | 0 | 0 | 0 | 0 | 0  | 0                                                                                                                                                                                                                        | 0  | 0 | 0 | 0 | 0 | 0  | 0  | 0 | 0   | 0 | 0 | 0 | 0 | 0  | 0 | 0 | 0 |
|                                              | 0 | 0 | 0 | 0 | 0 | 0 | 0 | 0 | 0  | 0                                                                                                                                                                                                                        | 20 | 0 | 0 | 0 | 0 | 0  | 0  | 0 | 0   | 0 | 0 | 0 | 0 | 0  | 0 | 0 | 0 |
|                                              | 0 | 0 | 0 | 0 | 0 | 0 | 0 | 0 | 0  | 0                                                                                                                                                                                                                        | 0  | 0 | 0 | 0 | 0 | 30 | 0  | 0 | 0   | 0 | 0 | 0 | 0 | 0  | 0 | 0 | 0 |
|                                              | 0 | 0 | 0 | 0 | 0 | 0 | 0 | 0 | 0  | 0                                                                                                                                                                                                                        | 0  | 0 | 0 | 0 | 0 | 0  | 0  | 0 | 0   | 0 | 0 | 0 | 0 | 0  | 0 |   |   |
| M02255_77_000000000-ADUT3_1_1108_12388_19105 |   |   |   |   |   |   |   |   |    | T---AC---GT-AG-GCA-----GCG-A-G-----C-G--T---T-GT-T-CGG-AG-----TT-A--C-T--GG-GC-----GT--A----AA-GC-GT-GC-----G-TA-G-G-C-G-----G-T-GT-C-T-T-----                                                                           |    |   |   |   |   |    |    |   |     |   |   |   |   |    |   |   |   |
|                                              |   |   |   |   |   |   |   |   |    | -----AA---G-T-T-T-----G-T-T--G--TG--A-AA-TC--T-C-CC-G-G-----CT-T-AA-----C-C-G-G-G-A-G--G-G---T-G--C-G--G-C-----G--AA-T-A--C-----T--G-A-GA--T-G-C---TG-G-A-G-T-G--C-GG---GA-G-A-----G-G-T-A--AG-C-----GG--A--ATT---       |    |   |   |   |   |    |    |   |     |   |   |   |   |    |   |   |   |
|                                              |   |   |   |   |   |   |   |   |    | C-C-C-G-GT--GT-A-G-CG-GT--G---A--A---TG-C-GT-AG--AT-A-TC--G-G--G-A-G-G-A-AC-A-CC---TG--A--G--AT-GTA-G--A-T--G-----G--C-T-T-A---CTG--G--AC-C-G-----T-A---A-C-T--GA--CG-C-T-G--A-GG--C-A-CG-A-AA-G-C---G-TG--GG-           |    |   |   |   |   |    |    |   |     |   |   |   |   |    |   |   |   |
|                                              |   |   |   |   |   |   |   |   |    | T--AG-C-A-AA-----CA--GG     Bacteria(100);unclassified(100);unclassified(100);unclassified(100);unclassified(100);unclassified(100);unclassified(100);unclassified(100);unclassified(100);                               |    |   |   |   |   |    |    |   |     |   |   |   |   |    |   |   |   |
| Otu0551                                      | 0 | 0 | 0 | 0 | 0 | 0 | 0 | 0 | 0  | 0                                                                                                                                                                                                                        | 0  | 0 | 0 | 0 | 0 | 0  | 0  | 0 | 0   | 0 | 0 | 0 | 0 | 0  | 0 | 0 | 0 |
|                                              | 0 | 0 | 0 | 0 | 0 | 0 | 0 | 0 | 0  | 0                                                                                                                                                                                                                        | 0  | 0 | 0 | 0 | 0 | 0  | 0  | 0 | 0   | 0 | 0 | 0 | 0 | 0  | 0 | 0 | 0 |
|                                              | 0 | 0 | 0 | 0 | 0 | 0 | 0 | 0 | 0  | 0                                                                                                                                                                                                                        | 0  | 0 | 0 | 0 | 0 | 34 | 0  | 0 | 0   | 0 | 0 | 0 | 0 | 0  | 0 | 0 | 0 |
|                                              | 0 | 0 | 0 | 0 | 0 | 0 | 0 | 0 | 0  | 0                                                                                                                                                                                                                        | 0  | 0 | 0 | 0 | 0 | 0  | 0  | 0 | 0   | 0 | 0 | 0 | 0 | 0  | 0 |   |   |
| M02255_77_000000000-ADUT3_1_1119_7295_18738  |   |   |   |   |   |   |   |   |    | T---AC---GT-AG-GGA-----GCA-A-G-----C-G--T---T-GT-C-CGG-AT-----TT-A--T-T--GG-GC-----GT--A----AA-GA-GC-TC-----G-TA-G-G-C-G-----G--T-TA-A-G-A-----AA-                                                                       |    |   |   |   |   |    |    |   |     |   |   |   |   |    |   |   |   |
|                                              |   |   |   |   |   |   |   |   |    | ---G-T-C-A-----G-G-T-G--TG--A-AA-CC--T-C-CA-G-G-----CT-C-AA-----C-C-T-G-G-A-G--A-C---G-C--C-A--C-T-----T--GA-T-A--CT-----T--C-T--TT--G-A-C---T-T-G-A-G-T--T---C-GG---TA-G-G-----G-G-A-T--CA-C-----GG--A--ATT---C-C-T-G-  |    |   |   |   |   |    |    |   |     |   |   |   |   |    |   |   |   |
|                                              |   |   |   |   |   |   |   |   |    | GT--GT-A-G-CG-GT--G---A--A---TG-C-GC-AG--AT-A-TC--A-G--G-A-G-G-A-AC-A-CC---GA--T--G--GC-GAA-G--G-C--A-----G--T-G-A-T---CTG--G--GC-C-G-----A-T---A-C-T--GA--CG-C-T-G--A-GG--A-G-CG-A-AA-G-C---G-TG--GG-G--AG-             |    |   |   |   |   |    |    |   |     |   |   |   |   |    |   |   |   |
|                                              |   |   |   |   |   |   |   |   |    | C-G-AA-----CA--GG     Bacteria(100);Actinobacteria(100);Actinobacteria(100);unclassified(100);unclassified(100);unclassified(100);unclassified(100);unclassified(100);unclassified(100);                                 |    |   |   |   |   |    |    |   |     |   |   |   |   |    |   |   |   |
| Otu0552                                      | 0 | 0 | 0 | 0 | 0 | 0 | 0 | 0 | 97 | 0                                                                                                                                                                                                                        | 0  | 0 | 0 | 0 | 0 | 0  | 0  | 0 | 0   | 0 | 0 | 0 | 0 | 0  | 0 | 0 | 0 |
|                                              | 0 | 0 | 0 | 0 | 0 | 0 | 0 | 0 | 0  | 0                                                                                                                                                                                                                        | 0  | 0 | 0 | 0 | 0 | 0  | 0  | 0 | 219 | 0 | 0 | 0 | 0 | 0  | 0 | 0 | 0 |
|                                              | 0 | 0 | 0 | 0 | 0 | 0 | 0 | 0 | 0  | 0                                                                                                                                                                                                                        | 0  | 0 | 0 | 0 | 0 | 0  | 0  | 0 | 0   | 0 | 0 | 0 | 0 | 0  | 0 | 0 | 0 |
|                                              | 0 | 0 | 0 | 0 | 0 | 0 | 0 | 0 | 0  | 0                                                                                                                                                                                                                        | 0  | 0 | 0 | 0 | 0 | 0  | 0  | 0 | 0   | 0 | 0 | 0 | 0 | 0  | 0 |   |   |
| M02255_77_000000000-ADUT3_1_1101_14338_16919 |   |   |   |   |   |   |   |   |    | T---AC---GT-AG-GTG-----GCA-A-G-----C-G--T---T--AT-C-CGG-AT-----TT-A--C-T--GG-GT-----GT--A----AA-GG-GC-GA-----G-TA-G-G-C-G-----G--G-AC-T-G-C-----                                                                         |    |   |   |   |   |    |    |   |     |   |   |   |   |    |   |   |   |
|                                              |   |   |   |   |   |   |   |   |    | -----AA---G-T-C-A-----G-A-T-G--TG--A-AA-AC--T-A-TG-G-G-----CT-T-AA-----C-C-C-A-T-A-G--A-C---T-G--C-A--T-T-----T--GA-A-A--C-----T--G-T--GG--T-T-C---T-T-G-A-G-T-G--A-TG---GA-G-A-----G-G-C-A--GG-C-----GG--A--ATT---C-    |    |   |   |   |   |    |    |   |     |   |   |   |   |    |   |   |   |
|                                              |   |   |   |   |   |   |   |   |    | C-C-G-GT--GT-A-G-CG-GT--G---G--A-A---TG-C-GT-AG--AT-A-TC--G-G--G-A-G-G-A-AC-A-CC---AG--T--G--GC-GAA-G--G-C--G-----G--C-C-T-G---CTG--G--AC-A-T-----T-A---A-C-T--GA--CG-C-T-G--A-GG--C-G-CG-A-AA-G-T---G-TG--GG-           |    |   |   |   |   |    |    |   |     |   |   |   |   |    |   |   |   |
|                                              |   |   |   |   |   |   |   |   |    | G--AG-C-A-AA-----CA--GG     Bacteria(100);Firmicutes(100);Clostridia(100);Clostridiales(100);Ruminococcaceae(100);unclassified(100);unclassified(100);unclassified(100);unclassified(100);                               |    |   |   |   |   |    |    |   |     |   |   |   |   |    |   |   |   |
| Otu0553                                      | 0 | 0 | 0 | 0 | 0 | 0 | 0 | 0 | 0  | 0                                                                                                                                                                                                                        | 0  | 0 | 0 | 0 | 0 | 0  | 0  | 0 | 3   | 0 | 0 | 0 | 0 | 0  | 0 | 0 | 0 |
|                                              | 0 | 0 | 0 | 0 | 0 | 0 | 0 | 0 | 0  | 0                                                                                                                                                                                                                        | 0  | 0 | 0 | 0 | 0 | 0  | 0  | 0 | 0   | 0 | 0 | 0 | 0 | 17 | 0 | 0 | 0 |
|                                              | 0 | 0 | 0 | 0 | 0 | 0 | 0 | 0 | 0  | 0                                                                                                                                                                                                                        | 0  | 0 | 0 | 0 | 0 | 0  | 17 | 0 | 0   | 0 | 0 | 0 | 0 | 0  | 0 | 0 | 0 |
|                                              | 0 | 0 | 0 | 0 | 0 | 0 | 0 | 0 | 0  | 0                                                                                                                                                                                                                        | 0  | 0 | 0 | 0 | 0 | 0  | 0  | 0 | 0   | 0 | 0 | 0 | 0 | 0  | 0 |   |   |
| M02255_77_000000000-ADUT3_1_2115_27363_12144 |   |   |   |   |   |   |   |   |    | G---AC---GG-AG-GGT-----GCT-A-G-----C-G--T---T-GT-T-CGG-AA-----TC-A--C-T--GG-GC-----GT--A----AA-GG-GC-GC-----G-TA-G-G-C-G-----G--C-TT-T-G-G---                                                                            |    |   |   |   |   |    |    |   |     |   |   |   |   |    |   |   |   |
|                                              |   |   |   |   |   |   |   |   |    | -----CA---G-T-C-G-----GTT-T--G--TG--A-AA-GC--C-C-GG-G-G-----CT-C-AA-----C-C-C-C-G-G-A--G-G---T-G--C-G---G-C-----C--GA-A-A--C-----A--C-C--AA--G-G-C---T-G-G-A-G-G--C---C-GG---AA-G-A-----G-G-A-G---GG-T-----GG--A--ATA--- |    |   |   |   |   |    |    |   |     |   |   |   |   |    |   |   |   |
|                                              |   |   |   |   |   |   |   |   |    | ---C-C-C-A-GT--GT-A-G-AG-GT--G---A--A---TT-C-GT-AG--AT-A-TT--G-G--G-T-G-G-A-AC-A-CC---GG--T--G--GC-GAA-A--G-C--G-----G--C-T-C-T---CTG--G--TC-C-G-----G-T---C-C-T--GA--CG-C-T-G--A-GG--C-G-CG-A-AA-G-C---G-T-G-           |    |   |   |   |   |    |    |   |     |   |   |   |   |    |   |   |   |
|                                              |   |   |   |   |   |   |   |   |    | GG-G--AG-C-A-AA-----CA--GG     Bacteria(100);Proteobacteria(100);Alphaproteobacteria(100);Rhodospirillales(100);unclassified(100);unclassified(100);unclassified(100);unclassified(100);unclassified(100);               |    |   |   |   |   |    |    |   |     |   |   |   |   |    |   |   |   |
| Otu0554                                      | 0 | 0 | 0 | 0 | 0 | 0 | 0 | 0 | 44 | 0                                                                                                                                                                                                                        | 0  | 0 | 0 | 0 | 0 | 0  | 0  | 0 | 0   | 0 | 0 | 0 | 0 | 0  | 0 | 0 | 0 |
|                                              | 0 | 0 | 0 | 0 | 0 | 0 | 0 | 0 | 0  | 0                                                                                                                                                                                                                        | 0  | 0 | 0 | 0 | 0 | 0  | 0  | 0 | 0   | 0 | 0 | 0 | 0 | 0  | 0 | 0 | 0 |
|                                              | 0 | 0 | 0 | 0 | 0 | 0 | 0 | 0 | 0  | 0                                                                                                                                                                                                                        | 0  | 0 | 0 | 0 | 0 | 25 | 0  | 0 | 0   | 0 | 0 | 0 | 0 | 0  | 0 | 0 | 0 |
|                                              | 0 | 0 | 0 | 0 | 0 | 0 | 0 | 0 | 0  | 0                                                                                                                                                                                                                        | 0  | 0 | 0 | 0 | 0 | 0  | 0  | 0 | 0   | 0 | 0 | 0 | 0 | 0  | 0 |   |   |
| M02255_77_000000000-ADUT3_1_1104_15766_13966 |   |   |   |   |   |   |   |   |    | G---AC---AG-AG-GGT-----GCT-A-G-----C-G--T---T-GT-T-CGG-AA-----TT-A--C-T--GG-GC-----GT--A----AA-GG-GC-GC-----G-TA-G-G-C-G-----G--C-TC-G-T-T-----                                                                          |    |   |   |   |   |    |    |   |     |   |   |   |   |    |   |   |   |
|                                              |   |   |   |   |   |   |   |   |    | -----TA---G-T-C-G-----G-G-T-G--TG--A-AA-TC--C-C-AA-G-G-----CT-C-AA-----C-C-T-T-G-G-A--A-C---T-G--C-A--T-T-----C--GA-T-A--C-----T--G-G--CG--G-G-C---T-A-G-A-G-A--C---C-GG---AA-G-A-----G-G-T-G---GG-T-----GG--A--ATA---   |    |   |   |   |   |    |    |   |     |   |   |   |   |    |   |   |   |
|                                              |   |   |   |   |   |   |   |   |    | C-C-C-A-GT--GT-A-G-AG-GT--G---A--A---TT-C-GT-AG--AT-A-TT--G-G--G-T-G-G-A-AC-A-CC---GG--T--G--GC-GAA-G--G-C--G-----G--C-T-C-A---CTG--G--TC-C-G-----G-T---T-C-T--GA--CG-C-T-G--A-GG--C-G-CG-A-AA-G-C---G-TG--GG-           |    |   |   |   |   |    |    |   |     |   |   |   |   |    |   |   |   |
|                                              |   |   |   |   |   |   |   |   |    | G--AG-C-A-AA-----CA--GG     Bacteria(100);Proteobacteria(100);Alphaproteobacteria(100);unclassified(100);unclassified(100);unclassified(100);unclassified(100);unclassified(100);unclassified(100);                      |    |   |   |   |   |    |    |   |     |   |   |   |   |    |   |   |   |



[illegible]



[illegible]



|         |                                              |   |   |   |   |   |    |                                                                                                                                                                                                                                                                                                                                                                                                                                                                                                                                                                                            |   |    |   |   |   |   |    |    |   |   |   |   |   |   |    |   |                                                                                                                                                                            |   |  |  |  |  |  |  |  |  |  |  |  |  |  |  |  |
|---------|----------------------------------------------|---|---|---|---|---|----|--------------------------------------------------------------------------------------------------------------------------------------------------------------------------------------------------------------------------------------------------------------------------------------------------------------------------------------------------------------------------------------------------------------------------------------------------------------------------------------------------------------------------------------------------------------------------------------------|---|----|---|---|---|---|----|----|---|---|---|---|---|---|----|---|----------------------------------------------------------------------------------------------------------------------------------------------------------------------------|---|--|--|--|--|--|--|--|--|--|--|--|--|--|--|--|
| Otu0565 | 0                                            | 0 | 0 | 0 | 0 | 0 | 0  | 0                                                                                                                                                                                                                                                                                                                                                                                                                                                                                                                                                                                          | 0 | 0  | 0 | 0 | 0 | 0 | 0  | 0  | 0 | 0 | 0 | 0 | 0 | 0 | 0  | 0 | 0                                                                                                                                                                          | 0 |  |  |  |  |  |  |  |  |  |  |  |  |  |  |  |
|         | 0                                            | 0 | 2 | 0 | 0 | 0 | 29 | 0                                                                                                                                                                                                                                                                                                                                                                                                                                                                                                                                                                                          | 0 | 32 | 0 | 0 | 0 | 0 | 0  | 0  | 0 | 0 | 0 | 0 | 0 | 0 | 0  | 0 | 0                                                                                                                                                                          | 0 |  |  |  |  |  |  |  |  |  |  |  |  |  |  |  |
|         | 0                                            | 0 | 0 | 0 | 0 | 0 | 0  | 0                                                                                                                                                                                                                                                                                                                                                                                                                                                                                                                                                                                          | 0 | 0  | 0 | 0 | 0 | 0 | 0  | 0  | 0 | 0 | 0 | 0 | 0 | 0 | 0  | 0 | 0                                                                                                                                                                          | 0 |  |  |  |  |  |  |  |  |  |  |  |  |  |  |  |
|         | 0                                            | 0 | 0 | 0 | 0 | 0 | 0  | 0                                                                                                                                                                                                                                                                                                                                                                                                                                                                                                                                                                                          | 0 | 0  | 0 | 0 | 0 | 0 | 0  | 0  | 0 | 0 | 0 | 0 | 0 | 0 | 0  | 0 | 0                                                                                                                                                                          | 0 |  |  |  |  |  |  |  |  |  |  |  |  |  |  |  |
|         | M02255_77_000000000-ADUT3_1_1105_26738_15862 |   |   |   |   |   |    | T---AC--GT-AG-GTG-----GCG-A-G----C-G--T---T-GT-C-CGG-AT-----TT-A--C-T-GG-GC-----GT--A----AA-GG-GC-GC-----G-CA-G-G-C-G-----G--T-CT-G-T-T-----TA---G-T-C-T-----A-G-G--G--TG--A-AA-GC--T-C-CC-G-G----CT-C-AA-----C-T-G-G-G-A-G--A-G---G-T--C-C--T-T-----G--GA-T-A--C-----T-G-G--CA--G-A-C---T-C-G-A-G-G--G--A-TG----CA-G-A-----G-G-A-A--AG-T----GG--A--ATT---C-C-C-G-GT--GT-A-G-TG-GT--G--A--T-A--TG-C-GT-AG--AT-A-TC--G-G--G-A-G-G-A-AC-A-CC--AG--T--G--GC-GAA-G--G-C-G-----G--C-T-T-T---CTG--G--GC-A-T-----T-A--C-C-T-GA--CG-C-T-G--A-GG--C-G-CG-A-AA-G-C--G-TG--GG-G--AG-C-G-AA-----CC--GG |   |    |   |   |   |   |    |    |   |   |   |   |   |   |    |   | Bacteria(100);Chloroflexi(100);S085(54);unclassified(54);unclassified(54);unclassified(54);unclassified(54);unclassified(54);unclassified(54);                             |   |  |  |  |  |  |  |  |  |  |  |  |  |  |  |  |
| Otu0566 | 0                                            | 0 | 0 | 0 | 0 | 0 | 0  | 0                                                                                                                                                                                                                                                                                                                                                                                                                                                                                                                                                                                          | 0 | 0  | 0 | 0 | 0 | 0 | 0  | 0  | 0 | 0 | 0 | 0 | 0 | 0 | 0  | 0 | 0                                                                                                                                                                          | 0 |  |  |  |  |  |  |  |  |  |  |  |  |  |  |  |
|         | 0                                            | 0 | 0 | 0 | 0 | 0 | 0  | 0                                                                                                                                                                                                                                                                                                                                                                                                                                                                                                                                                                                          | 0 | 0  | 0 | 0 | 0 | 0 | 0  | 0  | 0 | 0 | 0 | 0 | 0 | 0 | 43 | 0 | 0                                                                                                                                                                          | 0 |  |  |  |  |  |  |  |  |  |  |  |  |  |  |  |
|         | 0                                            | 0 | 0 | 0 | 0 | 0 | 0  | 0                                                                                                                                                                                                                                                                                                                                                                                                                                                                                                                                                                                          | 0 | 0  | 0 | 0 | 0 | 0 | 0  | 15 | 0 | 0 | 0 | 0 | 0 | 0 | 0  | 0 | 0                                                                                                                                                                          | 0 |  |  |  |  |  |  |  |  |  |  |  |  |  |  |  |
|         | 0                                            | 0 | 0 | 0 | 0 | 0 | 0  | 0                                                                                                                                                                                                                                                                                                                                                                                                                                                                                                                                                                                          | 0 | 0  | 0 | 0 | 0 | 0 | 0  | 0  | 0 | 0 | 0 | 0 | 0 | 0 | 0  | 0 | 0                                                                                                                                                                          | 0 |  |  |  |  |  |  |  |  |  |  |  |  |  |  |  |
|         | M02255_77_000000000-ADUT3_1_1107_12603_12830 |   |   |   |   |   |    | T---AC--GT-AG-GGG-----GCA-A-G----C-G--T---T-GT-C-CGG-AT-----TT-A--T-T-GG-GC-----GT--A----AA-GA-GC-TC-----G-TA-G-G-C-G-----G--T-TC-G-A-C-----AA---G-T-C-G-----A-A-T--G--TG--A-AA-TC--T-C-CA-C-G----CT-C-AA-----C-G-T-G-G-A-G--G---G-G--TCA--T-T-----C--GA-A-A--C-----T-G-T--CG-TG-A-C---T-T-G-A-G-T-A--C-GG----TA-G-G-----G-G--AG--TG-T----GG--A--ATTC---C-C--G-GT--GT-A-G-CG-GT--G--A--A-A--TG-C-GC-AG--AG-A-TC--G-G--G-A-G-G-A-AC-A-CC--CG--T--A--GC-GAA-G--G-C-G-----G--C-A-C-T---CTGG--GC-C-G-----A-T--A-C-T-GA--CG-C-T-G--A-GG--A-G-CG-A-AA-G-C--G-TG--GG-G--AG-C-A-AA-----CA--GG      |   |    |   |   |   |   |    |    |   |   |   |   |   |   |    |   | Bacteria(100);Actinobacteria(100);Actinobacteria(100);Acidimicrobiae(100);Acidimicrobiales(100);Acidimicrobineae(100);uncultured(100);unclassified(100);unclassified(100); |   |  |  |  |  |  |  |  |  |  |  |  |  |  |  |  |
| Otu0567 | 0                                            | 0 | 0 | 0 | 0 | 0 | 0  | 0                                                                                                                                                                                                                                                                                                                                                                                                                                                                                                                                                                                          | 0 | 0  | 0 | 0 | 0 | 0 | 0  | 0  | 0 | 0 | 0 | 0 | 0 | 0 | 0  | 5 | 0                                                                                                                                                                          | 0 |  |  |  |  |  |  |  |  |  |  |  |  |  |  |  |
|         | 0                                            | 0 | 0 | 0 | 0 | 0 | 0  | 0                                                                                                                                                                                                                                                                                                                                                                                                                                                                                                                                                                                          | 0 | 0  | 0 | 0 | 0 | 0 | 11 | 0  | 0 | 0 | 0 | 0 | 0 | 0 | 0  | 0 | 0                                                                                                                                                                          | 0 |  |  |  |  |  |  |  |  |  |  |  |  |  |  |  |
|         | 0                                            | 0 | 0 | 0 | 0 | 0 | 0  | 0                                                                                                                                                                                                                                                                                                                                                                                                                                                                                                                                                                                          | 0 | 0  | 0 | 0 | 0 | 0 | 0  | 0  | 0 | 0 | 0 | 0 | 0 | 0 | 0  | 0 | 0                                                                                                                                                                          | 0 |  |  |  |  |  |  |  |  |  |  |  |  |  |  |  |
|         | 0                                            | 0 | 0 | 0 | 0 | 0 | 0  | 0                                                                                                                                                                                                                                                                                                                                                                                                                                                                                                                                                                                          | 0 | 0  | 0 | 0 | 0 | 0 | 0  | 0  | 0 | 0 | 0 | 0 | 0 | 0 | 0  | 0 | 0                                                                                                                                                                          | 0 |  |  |  |  |  |  |  |  |  |  |  |  |  |  |  |
|         | M02255_77_000000000-ADUT3_1_1117_21479_17832 |   |   |   |   |   |    | G---AC---AG-AG-GCC-----ACG-A-G----C-G--T---T-AG-G-CGG-AA-----TC-A--C-T-GG-GC-----TT-A----AA-GC-GT-GT-----G-TA-G-G-C-G-----G--A-CC-C-G-T-----AA---G-T-G-T-----C-T-T--G--TG--A-AA-TC--C-C-AC-G-G----CT-C-AA-----C-C-G-T-G-G-A-A-C---T-G--C-T--G-G-----G--CA-T-A--C-----T-G-C--GG--G-T-C---T-T-G-A-G-C-C--G-GC---CA-G-G-----G-G-T-C--AC-C-----GG--A--ACA---A-G-C-G-GT--GG-A-G-CG-GT--G---A--A-A--TG-C-GT-AG--AT-A-TC--G-C--T-T-G-G-A-AC-G-CC--GA--C--G--GT-GAA-A-A-C-A-----G--G-T-G-A--CTG--G--GG-C-C-----G-C--G-C-T-GA--CG-C-T-G--A-GA--C-A-CG-A-AA-G-C--C-AG--GG-G--AG-C-G-AA-----CG--GG    |   |    |   |   |   |   |    |    |   |   |   |   |   |   |    |   | Bacteria(100);Planctomycetes(100);Phycisphaerae(100);WD2101(100);unclassified(100);unclassified(100);unclassified(100);unclassified(100);unclassified(100);                |   |  |  |  |  |  |  |  |  |  |  |  |  |  |  |  |
| Otu0568 | 0                                            | 0 | 0 | 0 | 0 | 0 | 0  | 0                                                                                                                                                                                                                                                                                                                                                                                                                                                                                                                                                                                          | 0 | 0  | 0 | 0 | 0 | 0 | 0  | 0  | 0 | 0 | 0 | 0 | 0 | 0 | 0  | 0 | 0                                                                                                                                                                          | 0 |  |  |  |  |  |  |  |  |  |  |  |  |  |  |  |
|         | 0                                            | 0 | 0 | 0 | 0 | 0 | 88 | 0                                                                                                                                                                                                                                                                                                                                                                                                                                                                                                                                                                                          | 0 | 0  | 1 | 0 | 0 | 0 | 0  | 0  | 0 | 0 | 0 | 0 | 0 | 0 | 0  | 0 | 0                                                                                                                                                                          | 0 |  |  |  |  |  |  |  |  |  |  |  |  |  |  |  |
|         | 0                                            | 0 | 0 | 0 | 0 | 0 | 0  | 0                                                                                                                                                                                                                                                                                                                                                                                                                                                                                                                                                                                          | 0 | 0  | 0 | 0 | 0 | 0 | 0  | 0  | 0 | 0 | 0 | 0 | 0 | 0 | 0  | 0 | 0                                                                                                                                                                          | 0 |  |  |  |  |  |  |  |  |  |  |  |  |  |  |  |
|         | 0                                            | 0 | 0 | 0 | 0 | 0 | 0  | 0                                                                                                                                                                                                                                                                                                                                                                                                                                                                                                                                                                                          | 0 | 0  | 0 | 0 | 0 | 0 | 0  | 0  | 0 | 0 | 0 | 0 | 0 | 0 | 0  | 0 | 0                                                                                                                                                                          | 0 |  |  |  |  |  |  |  |  |  |  |  |  |  |  |  |
|         | M02255_77_000000000-ADUT3_1_1103_5176_13178  |   |   |   |   |   |    | T---AC--GT-AG-GGG-----GCA-A-G----C-G--T---T-GT-C-CGG-AT-----TT-A--T-T-GG-GC-----GT--A----AA-GG-GT-GC-----G-CA-G-G-C-G-----G--T-CT-A-T-T-----AA---G-T-C-A-----G-A-T                                                                                                                                                                                                                                                                                                                                                                                                                         |   |    |   |   |   |   |    |    |   |   |   |   |   |   |    |   |                                                                                                                                                                            |   |  |  |  |  |  |  |  |  |  |  |  |  |  |  |  |



|                                                                                                                                                                                                                                                                                                                                                                                                                                                                                                                                                                                                                                                                                                                                                                                                                                                              |   |   |   |   |   |   |    |   |     |   |     |   |    |     |     |   |   |     |     |     |   |    |   |   |   |   |   |
|--------------------------------------------------------------------------------------------------------------------------------------------------------------------------------------------------------------------------------------------------------------------------------------------------------------------------------------------------------------------------------------------------------------------------------------------------------------------------------------------------------------------------------------------------------------------------------------------------------------------------------------------------------------------------------------------------------------------------------------------------------------------------------------------------------------------------------------------------------------|---|---|---|---|---|---|----|---|-----|---|-----|---|----|-----|-----|---|---|-----|-----|-----|---|----|---|---|---|---|---|
| Otu0570                                                                                                                                                                                                                                                                                                                                                                                                                                                                                                                                                                                                                                                                                                                                                                                                                                                      | 0 | 0 | 0 | 0 | 0 | 0 | 0  | 0 | 0   | 0 | 0   | 0 | 0  | 0   | 0   | 0 | 0 | 0   | 0   | 0   | 0 | 0  | 0 | 0 | 0 | 0 | 0 |
|                                                                                                                                                                                                                                                                                                                                                                                                                                                                                                                                                                                                                                                                                                                                                                                                                                                              | 0 | 0 | 0 | 0 | 0 | 0 | 0  | 0 | 0   | 0 | 0   | 0 | 0  | 0   | 29  | 0 | 0 | 0   | 0   | 0   | 0 | 0  | 0 | 0 | 0 | 0 | 0 |
|                                                                                                                                                                                                                                                                                                                                                                                                                                                                                                                                                                                                                                                                                                                                                                                                                                                              | 0 | 1 | 5 | 0 | 0 | 0 | 0  | 0 | 0   | 0 | 0   | 0 | 0  | 248 | 112 | 3 | 0 | 0   | 0   | 0   | 0 | 0  | 0 | 0 | 0 | 0 | 0 |
|                                                                                                                                                                                                                                                                                                                                                                                                                                                                                                                                                                                                                                                                                                                                                                                                                                                              | 0 | 0 | 0 | 0 | 0 | 0 | 0  | 0 | 0   | 0 | 0   | 0 | 0  | 0   | 0   | 0 | 0 | 0   | 0   | 0   | 0 | 0  | 0 | 0 | 0 |   |   |
| M02255_76_000000000-ADUNE_1_1106_20145_6284 T---AC---GT-AG-GGG-----GCG-A-G-----C--G--T---T--GT-C-CGG-AA-----TT-A--C-T--GG-GC-----GT--A----AA-GG-GC-AC-----G-CA-G-G-C-T-----G--T-GC-T-T-C-----AA-<br>---G-T-C-A-----G-C-T--G--TA--A-AA-GG--A-T-GC-G-G----CT-T-AA-----C-C-G-T-G-T-T--A-----T-G--C-G---G--C-----T--GA-G-A--C-----T--G-A--GG--T-G-C---T-G-G-A-G-T--A--C-CG----GA-G-A-----G-G-C-A---AG-T-----GG--A--ATT---C-C-C-A-<br>GT--GT-A-G-CG-GT--G---A--A-A---TG-C-GT-AG--AT-A-TT--G-G--G-A-A-G-A-AC-A-TC---GG--T--G--GC-GAA-G--G-C-G-----A--C-T-T-G---CTG--G--AC-G-G-----T-A---A-C-T--GA--CG-C-T-G--A-GG--T-G-CG-A--AA-G-C---C-AG--GG-T--AG-<br>C-G-AA-----CG--GG   Bacteria(100);Synergistetes(100);Synergistia(100);Synergistales(100);Synergistaceae(100);uncultured(100);unclassified(100);unclassified(100);unclassified(100);                       |   |   |   |   |   |   |    |   |     |   |     |   |    |     |     |   |   |     |     |     |   |    |   |   |   |   |   |
| Otu0571                                                                                                                                                                                                                                                                                                                                                                                                                                                                                                                                                                                                                                                                                                                                                                                                                                                      | 0 | 0 | 0 | 0 | 0 | 0 | 0  | 0 | 0   | 0 | 0   | 0 | 0  | 0   | 0   | 0 | 0 | 0   | 0   | 0   | 0 | 0  | 0 | 0 | 0 | 0 | 0 |
|                                                                                                                                                                                                                                                                                                                                                                                                                                                                                                                                                                                                                                                                                                                                                                                                                                                              | 0 | 0 | 0 | 0 | 0 | 0 | 0  | 0 | 0   | 0 | 0   | 0 | 0  | 0   | 0   | 0 | 0 | 0   | 0   | 122 | 0 | 0  | 0 | 0 | 0 | 0 | 0 |
|                                                                                                                                                                                                                                                                                                                                                                                                                                                                                                                                                                                                                                                                                                                                                                                                                                                              | 0 | 0 | 0 | 0 | 0 | 0 | 0  | 0 | 0   | 0 | 0   | 0 | 0  | 0   | 0   | 0 | 0 | 0   | 0   | 0   | 0 | 0  | 0 | 0 | 0 | 0 | 0 |
|                                                                                                                                                                                                                                                                                                                                                                                                                                                                                                                                                                                                                                                                                                                                                                                                                                                              | 0 | 0 | 0 | 0 | 0 | 0 | 0  | 0 | 0   | 0 | 0   | 0 | 0  | 0   | 0   | 0 | 0 | 0   | 0   | 0   | 0 | 0  | 0 | 0 | 0 | 0 | 0 |
| M02255_76_000000000-ADUNE_1_2119_10318_8447 C---TA---AC-TC-CGT-----GCC-A-G-----C--A--G---C--CG-C-GGT-AA-----TA-C--G-G--AG-GG-----TC--C----GA-GC-GT-TA-----T-C--C-G--G-----A--T-CA-A-T-T-----AA---<br>G-T-C-A-----G-A-G--G--TG--A-AA-TC--C-C-AT-A-G----CT-C-AA-----C-T-A-T-G-G-A--A-C---T-G--C-C---T--T-----T--GA-T-A--C-----T--G-G--TT--G-A-C---T-T-G-A-G-T--C---A-TA----TG-G-A-----A-G-T-A--GA-T-----AG--A--ATG---T-G-T-A-GT--<br>GT-A-G-CG-GT--G---A--A-A---TG-C-AT-AG--AT-A-TT--A-C--A-C-A-G-A-AT-A-CC--GA--T--T--GC-GAA-G--G-C-A-----G--T-C-T-A--CTA--C--GT-A-T-----G-T---A-C-T--GA--CG-C-T-G--A-GG--G-A-CG-A--AA-G-C---G-TG--GG-G--AG-C-G-<br>AA-----CA--GG   Bacteria(100);Bacteroidetes(100);Flavobacteria(100);Flavobacteriales(100);Flavobacteriaceae(100);Polaribacter(100);unclassified(100);unclassified(100);unclassified(100);                 |   |   |   |   |   |   |    |   |     |   |     |   |    |     |     |   |   |     |     |     |   |    |   |   |   |   |   |
| Otu0572                                                                                                                                                                                                                                                                                                                                                                                                                                                                                                                                                                                                                                                                                                                                                                                                                                                      | 0 | 0 | 0 | 0 | 0 | 0 | 0  | 0 | 0   | 0 | 0   | 0 | 0  | 0   | 0   | 0 | 0 | 0   | 0   | 0   | 0 | 0  | 0 | 0 | 0 | 0 | 0 |
|                                                                                                                                                                                                                                                                                                                                                                                                                                                                                                                                                                                                                                                                                                                                                                                                                                                              | 0 | 0 | 0 | 0 | 0 | 0 | 0  | 0 | 0   | 0 | 0   | 0 | 0  | 44  | 0   | 0 | 0 | 0   | 0   | 0   | 0 | 35 | 0 | 0 | 0 | 0 | 0 |
|                                                                                                                                                                                                                                                                                                                                                                                                                                                                                                                                                                                                                                                                                                                                                                                                                                                              | 0 | 0 | 0 | 0 | 0 | 0 | 0  | 0 | 0   | 0 | 0   | 0 | 0  | 0   | 0   | 0 | 0 | 0   | 0   | 0   | 0 | 0  | 0 | 0 | 0 | 0 | 0 |
|                                                                                                                                                                                                                                                                                                                                                                                                                                                                                                                                                                                                                                                                                                                                                                                                                                                              | 0 | 0 | 0 | 0 | 0 | 0 | 0  | 0 | 0   | 0 | 0   | 0 | 0  | 0   | 0   | 0 | 0 | 0   | 0   | 0   | 0 | 0  | 0 | 0 | 0 | 0 | 0 |
| M02255_77_000000000-ADUT3_1_2112_25087_4149 T---AC---GT-AG-GGG-----GCG-A-G-----C--G--T---T--GT-C-CGG-AT-----TT-A--T-T--GG-GC-----GT--A----AA-GA-GC-TC-----G-TA-G-G-C-G-----G--T-TT-G-G-C-----AA-<br>---G-T-C-G-----G-G-T--G--TG--A-AA-AC--T-C-CG-G-G----CT-C-AA-----C-T-C-G-G-A-G--A-----C-G-CC-A--C--T-----C--GA-T-A--C-----T--G-C--CA-TG-A-C---T-C-G-A-G-T--C---C-GG----TA-G-G-----G-G-A-G--TG-C-----GG--A--ATT---C-C-T-G-<br>GT--GT-A-G-CG-GT--G---A--A-A---TG-C-GC-AG--AT-A-TC--A-G--G-A-G-G-A-AC-A-CC--GG--T--G--GC-GAA-G--G-C-G-----G--C-A-C-T---CTG--G--GC-C-G-----G-T---A-C-T--GA--CG-C-T-G--A-GG--A-G-CG-A--AA-G-C---G-TG--GG-G--AG-<br>C-G-AA-----CA--GG   Bacteria(100);Actinobacteria(100);Actinobacteria(100);unclassified(100);unclassified(100);unclassified(100);unclassified(100);unclassified(100);unclassified(100);                      |   |   |   |   |   |   |    |   |     |   |     |   |    |     |     |   |   |     |     |     |   |    |   |   |   |   |   |
| Otu0573                                                                                                                                                                                                                                                                                                                                                                                                                                                                                                                                                                                                                                                                                                                                                                                                                                                      | 0 | 0 | 0 | 0 | 0 | 0 | 0  | 0 | 0   | 0 | 0   | 0 | 0  | 0   | 0   | 0 | 0 | 0   | 0   | 0   | 0 | 0  | 0 | 0 | 0 | 0 | 0 |
|                                                                                                                                                                                                                                                                                                                                                                                                                                                                                                                                                                                                                                                                                                                                                                                                                                                              | 0 | 0 | 0 | 0 | 0 | 0 | 14 | 0 | 0   | 0 | 0   | 0 | 15 | 0   | 2   | 0 | 0 | 0   | 0   | 0   | 0 | 0  | 0 | 0 | 0 | 0 | 0 |
|                                                                                                                                                                                                                                                                                                                                                                                                                                                                                                                                                                                                                                                                                                                                                                                                                                                              | 0 | 0 | 0 | 0 | 0 | 0 | 0  | 0 | 0   | 0 | 1   | 0 | 0  | 0   | 0   | 0 | 0 | 0   | 0   | 70  | 0 | 0  | 0 | 0 | 0 | 0 | 0 |
|                                                                                                                                                                                                                                                                                                                                                                                                                                                                                                                                                                                                                                                                                                                                                                                                                                                              | 0 | 0 | 0 | 0 | 0 | 0 | 0  | 0 | 0   | 0 | 0   | 0 | 0  | 0   | 0   | 0 | 0 | 0   | 0   | 0   | 0 | 0  | 0 | 0 | 0 | 0 | 0 |
| M02255_77_000000000-ADUT3_1_1105_18560_23449           T---AC---GT-AG-GGG-----GCA-A-G-----C--G--T---T--GT-C-CGG-AA-----TG-A--T-T--GG-GC-----GT--A----AA-GG-GC-TC-----G-TA-G-G-T-G-----G--C-AT-G-T-C---<br>-----AA---G-T-C-T-----G-A-A--G--TG--A-AA-GT--C-C-TA-C-T----TT-T-AA-----G-G-T-G-G-G-A--A-T---T-G--C-T---T--T-----G--GA-A-A--C-----T--G-G--CA--A-G-C---T-T-G-A-G-T--A---T-AG----GA-G-A-----G-G-T-T---AG-T-----GG--A--ATT---C-C-<br>C-T-A-GT--GT-A-G-CG-GT--G---A--A-A---TG-C-GT-AG--AG-A-TT--A-G--G-A-G-G-A-AC-A-TC--AG--T--G--GC-GAA-G--G-C-G-----A--C-T-A-A---CTG--G--AC-T-A-----A-A---A-C-T--GA--CA-C-T-G--A-GG--A-G-CG-A--AA-G-T---G-TG--GG-<br>T--AG-C-A-AA-----CA--GG   Bacteria(100);unclassified(100);unclassified(100);unclassified(100);unclassified(100);unclassified(100);unclassified(100);unclassified(100);                           |   |   |   |   |   |   |    |   |     |   |     |   |    |     |     |   |   |     |     |     |   |    |   |   |   |   |   |
| Otu0574                                                                                                                                                                                                                                                                                                                                                                                                                                                                                                                                                                                                                                                                                                                                                                                                                                                      | 0 | 0 | 0 | 0 | 0 | 0 | 0  | 0 | 0   | 0 | 0   | 0 | 0  | 0   | 0   | 0 | 0 | 0   | 0   | 0   | 0 | 0  | 0 | 0 | 0 | 0 | 0 |
|                                                                                                                                                                                                                                                                                                                                                                                                                                                                                                                                                                                                                                                                                                                                                                                                                                                              | 0 | 0 | 0 | 0 | 0 | 0 | 0  | 0 | 0   | 0 | 97  | 0 | 0  | 0   | 18  | 0 | 0 | 0   | 0   | 0   | 0 | 0  | 0 | 0 | 0 | 0 | 0 |
|                                                                                                                                                                                                                                                                                                                                                                                                                                                                                                                                                                                                                                                                                                                                                                                                                                                              | 0 | 0 | 0 | 0 | 0 | 0 | 0  | 0 | 0   | 0 | 2   | 0 | 5  | 0   | 0   | 0 | 0 | 135 | 195 | 0   | 0 | 0  | 0 | 0 | 0 | 0 | 0 |
|                                                                                                                                                                                                                                                                                                                                                                                                                                                                                                                                                                                                                                                                                                                                                                                                                                                              | 0 | 0 | 0 | 0 | 0 | 0 | 0  | 2 | 114 | 0 | 121 | 0 | 0  | 5   | 0   | 0 | 0 | 0   | 0   | 0   | 0 | 0  | 0 | 0 | 0 | 0 | 0 |
| M02255_77_000000000-ADUT3_1_2119_17560_17371           T---AC---GT-AT-GGA-----CCG-A-G-----C--G--T---T--AT-C-CGG-AA-----TC-A--T-T--GG-GC-----GT--A----AA-GG-GT-AC-----G-TA-G-G-C-G-----G--T-TA-A-A-T-----<br>-----AA---G-T-T-A-----G-A-A--G--TG--A-AA-TC--C-C-AT-A-G----CT-C-AA-----C-T-A-T-A-G-T--A-----A-G--C-T---T--C-----T--AA-A-A--C-----T--G-T--AT--A-A-C---T-T-G-A-G-A--A--A-TG----AA-A-G-----G-G-A-A---AG-T-----GG--A--ATT---C-C-<br>T-A-GT--GT-A-G-CG-GT--G---A--A-A---TG-C-GC-AG--AT-A-TT--A-G--G-A-G-G-A-AT-A-CC--GG--T--G--GC-GAA-G--G-C-G-----A--C-T-T-T---CTG--G--TC-A-T-----A-T---T-C-T--GA--CG-C-T-G--A-GG--T-A-CG-A--AA-G-C---G-TG--GG-T--<br>AG-C-A-AA-----CA--GG   Bacteria(100);Firmicutes(100);Clostridia(100);Clostridiales(100);Family_XI_Incertae_Sedis(100);Anaerococcus(100);unclassified(100);unclassified(100);unclassified(100); |   |   |   |   |   |   |    |   |     |   |     |   |    |     |     |   |   |     |     |     |   |    |   |   |   |   |   |



|                                                                                                                                                                                                                            |    |   |   |   |   |   |   |   |   |                                                                                                                                                                                 |   |   |   |    |   |   |    |   |   |   |   |   |   |   |   |   |   |
|----------------------------------------------------------------------------------------------------------------------------------------------------------------------------------------------------------------------------|----|---|---|---|---|---|---|---|---|---------------------------------------------------------------------------------------------------------------------------------------------------------------------------------|---|---|---|----|---|---|----|---|---|---|---|---|---|---|---|---|---|
| Otu0575                                                                                                                                                                                                                    | 11 | 0 | 0 | 0 | 0 | 0 | 0 | 0 | 0 | 0                                                                                                                                                                               | 0 | 0 | 0 | 0  | 0 | 0 | 0  | 0 | 0 | 0 | 0 | 0 | 0 | 0 | 0 | 0 | 0 |
|                                                                                                                                                                                                                            | 0  | 0 | 0 | 0 | 0 | 0 | 0 | 0 | 0 | 0                                                                                                                                                                               | 0 | 0 | 0 | 20 | 0 | 0 | 0  | 0 | 0 | 0 | 0 | 0 | 0 | 0 | 0 | 0 | 0 |
|                                                                                                                                                                                                                            | 0  | 0 | 0 | 0 | 0 | 0 | 0 | 0 | 0 | 0                                                                                                                                                                               | 0 | 0 | 0 | 0  | 0 | 0 | 0  | 0 | 0 | 0 | 0 | 0 | 0 | 0 | 0 | 7 | 0 |
|                                                                                                                                                                                                                            | 0  | 0 | 0 | 0 | 0 | 0 | 0 | 0 | 8 | 0                                                                                                                                                                               | 0 | 0 | 0 | 0  | 0 | 0 | 0  | 0 | 0 | 0 | 0 | 0 | 0 | 0 | 0 |   |   |
| M02255_76_000000000-ADUNE_1_1106_16485_19660                                                                                                                                                                               |    |   |   |   |   |   |   |   |   | C---GG---CT-AA-CT-----ACG-T-G-----C-C-A--G--CA-G-CCG-CG-----GT-A--A-T--AC-GT-----AG--G-----TG-GC-AA-GC-----G-TT-G-T-C-G-----G--T-GA-T-T-T-----                                  |   |   |   |    |   |   |    |   |   |   |   |   |   |   |   |   |   |
| ----AA----G-T-C-T-----G-A-T-G--TG--A-AA-GC--C-C-CC-G-G-----CT-C-AA-----C-C-G-G-G-G-A-G-----G-GT-C-A--T-T-----G--GA-A-A--C-----T-G-G--AT--C-A-C---T-T-G-A-G-T-G--C-AG-----AA-G-A-----G-G-A-G--AG-T-----GG--A--ATT---C-      |    |   |   |   |   |   |   |   |   |                                                                                                                                                                                 |   |   |   |    |   |   |    |   |   |   |   |   |   |   |   |   |   |
| C-A-T-GT--GT-A-G-CG-GT--G---A--A-A---TG-C-GT-AG--AT-A-TA--T-G--G-A-G-G-A-AC-A-CC--AG--T-G--GC-GAA-G--G-C-G-----G--C-T-C-T---CTG--G--TC-T-G-----T-A--A-C-T--GA--CG-C-T-G--A-GG--C-T-CG-A--AA-G-C---G-TG--GG-T--             |    |   |   |   |   |   |   |   |   |                                                                                                                                                                                 |   |   |   |    |   |   |    |   |   |   |   |   |   |   |   |   |   |
| AG-C-A-AA-----CA--GG                                                                                                                                                                                                       |    |   |   |   |   |   |   |   |   | Bacteria(100);Firmicutes(100);Bacilli(100);Lactobacillales(100);unclassified(61);unclassified(61);unclassified(61);unclassified(61);unclassified(61);                           |   |   |   |    |   |   |    |   |   |   |   |   |   |   |   |   |   |
| Otu0576                                                                                                                                                                                                                    | 0  | 0 | 0 | 0 | 0 | 0 | 0 | 0 | 0 | 0                                                                                                                                                                               | 0 | 0 | 0 | 0  | 0 | 0 | 0  | 0 | 0 | 0 | 0 | 0 | 0 | 0 | 0 | 0 | 0 |
|                                                                                                                                                                                                                            | 0  | 0 | 6 | 0 | 0 | 0 | 0 | 0 | 0 | 102                                                                                                                                                                             | 0 | 0 | 0 | 0  | 0 | 0 | 0  | 0 | 0 | 0 | 0 | 0 | 0 | 0 | 0 | 0 | 0 |
|                                                                                                                                                                                                                            | 0  | 0 | 0 | 0 | 0 | 0 | 0 | 0 | 0 | 0                                                                                                                                                                               | 0 | 5 | 0 | 0  | 0 | 0 | 0  | 0 | 0 | 0 | 0 | 0 | 0 | 0 | 0 | 0 | 0 |
|                                                                                                                                                                                                                            | 0  | 0 | 0 | 0 | 0 | 0 | 0 | 0 | 0 | 0                                                                                                                                                                               | 0 | 0 | 0 | 0  | 0 | 0 | 0  | 0 | 0 | 0 | 0 | 0 | 0 | 0 | 0 |   |   |
| M02255_77_000000000-ADUT3_1_2101_20853_22567                                                                                                                                                                               |    |   |   |   |   |   |   |   |   | T---AC--GA-AG-GGG-----GCT-A-G-----C-G-T--T--GT-T-CGG-AA-----TT-A--C-T--GG-GC-----GT--A-----AA-GC-GC-AC-----G-TA-G-G-C-G-----G--A-CT-T-G-T-----                                  |   |   |   |    |   |   |    |   |   |   |   |   |   |   |   |   |   |
| -----CA----G-T-C-A-----G-G-G--G--TG--A-AA-TC--C-C-GA-G-G-----CT-T-AA-----C-C-T-C-G-G-A--A-C---T-G--C-C---T-T-----T-GA-T-A--C-----T-G-C--AA--G-T-C---T-T-G-A-G-G-A--T-GA----GA-G-A-----G-G-T-A--AG-T-----GG--A--ACT---G-    |    |   |   |   |   |   |   |   |   |                                                                                                                                                                                 |   |   |   |    |   |   |    |   |   |   |   |   |   |   |   |   |   |
| C-G-A-GT--GT-A-G-AG-GT--G---A--A-A---TT-C-GT-AG--AT-A-TT--C-G--C-A-A-G-A-AC-A-CC--AG--T-G--GC-GAA-G--G-C-G-----G--C-T-T-A--CTG--G--CT-C-A-----T-T--T-C-T--GA--CG-C-T-G--A-GG--T-G-CG-A--AA-G-C---G-TG--GG-G--              |    |   |   |   |   |   |   |   |   |                                                                                                                                                                                 |   |   |   |    |   |   |    |   |   |   |   |   |   |   |   |   |   |
| AG-C-A-AA-----CA--GG                                                                                                                                                                                                       |    |   |   |   |   |   |   |   |   | Bacteria(100);Proteobacteria(100);Alphaproteobacteria(100);unclassified(100);unclassified(100);unclassified(100);unclassified(100);unclassified(100);unclassified(100);         |   |   |   |    |   |   |    |   |   |   |   |   |   |   |   |   |   |
| Otu0577                                                                                                                                                                                                                    | 0  | 0 | 0 | 0 | 0 | 0 | 0 | 0 | 0 | 0                                                                                                                                                                               | 0 | 0 | 0 | 0  | 0 | 0 | 0  | 0 | 0 | 0 | 0 | 0 | 0 | 0 | 0 | 0 | 0 |
|                                                                                                                                                                                                                            | 0  | 0 | 0 | 0 | 0 | 0 | 0 | 0 | 0 | 0                                                                                                                                                                               | 0 | 0 | 0 | 58 | 0 | 0 | 0  | 0 | 0 | 0 | 0 | 0 | 0 | 0 | 0 | 0 | 0 |
|                                                                                                                                                                                                                            | 0  | 0 | 0 | 0 | 0 | 0 | 0 | 0 | 0 | 0                                                                                                                                                                               | 0 | 6 | 0 | 0  | 0 | 0 | 0  | 0 | 0 | 0 | 0 | 0 | 0 | 0 | 0 | 0 | 0 |
|                                                                                                                                                                                                                            | 0  | 0 | 0 | 0 | 0 | 0 | 0 | 0 | 0 | 0                                                                                                                                                                               | 0 | 0 | 0 | 0  | 0 | 0 | 0  | 0 | 0 | 0 | 0 | 0 | 0 | 0 | 0 |   |   |
| M02255_77_000000000-ADUT3_1_1107_21296_23386                                                                                                                                                                               |    |   |   |   |   |   |   |   |   | T---AC--GA-AG-GGG-----GCT-A-G-----C-G-T--T--GC-T-CGG-AA-----TT-A--C-T--GG-GC-----GT--A-----AA-GG-GC-GC-----G-TA-G-G-C-G-----G--C-GC-A-T-T-----                                  |   |   |   |    |   |   |    |   |   |   |   |   |   |   |   |   |   |
| -----TA---G-T-C-A-----G-G-C--G--TG--A-AA-TT--C-C-TG-G-G-----CT-T-AA-----C-C-T-G-G-G-G-A-C---T-G--C-G---C-T-----T-GA-T-A--C-----G--G-G--TG--T-G-C---T-T-G-A-G-G-A--C-GG-----AA-G-A-----G-G-C-T--CG-C-----GG--A--ATT---      |    |   |   |   |   |   |   |   |   |                                                                                                                                                                                 |   |   |   |    |   |   |    |   |   |   |   |   |   |   |   |   |   |
| C-C-C-A-GT--GT-A-G-AG-GT--G---A--A-A---TT-C-GT-AG--AT-A-TT--G-G--G-A-A-G-A-AC-A-CC--GG--T-G--GC-GAA-G--G-C-G-----G--C-G-A-G---CTG--G--TC-C-G-----T-A---T-C-T--GA--CG-C-T-G--A-GG--C-G-CG-A--CA-G-C---G-TG--                |    |   |   |   |   |   |   |   |   |                                                                                                                                                                                 |   |   |   |    |   |   |    |   |   |   |   |   |   |   |   |   |   |
| GG-G--AG-C-A-AA-----CA--GG                                                                                                                                                                                                 |    |   |   |   |   |   |   |   |   | Bacteria(100);Proteobacteria(100);Alphaproteobacteria(100);Rhodospirillales(100);Acetobacteraceae(100);unclassified(100);unclassified(100);unclassified(100);unclassified(100); |   |   |   |    |   |   |    |   |   |   |   |   |   |   |   |   |   |
| Otu0578                                                                                                                                                                                                                    | 0  | 0 | 0 | 0 | 0 | 0 | 0 | 0 | 0 | 0                                                                                                                                                                               | 0 | 0 | 0 | 0  | 0 | 0 | 0  | 0 | 0 | 0 | 0 | 0 | 0 | 0 | 0 | 0 | 0 |
|                                                                                                                                                                                                                            | 0  | 0 | 0 | 0 | 0 | 0 | 0 | 0 | 4 | 0                                                                                                                                                                               | 0 | 0 | 0 | 0  | 1 | 0 | 14 | 0 | 0 | 0 | 0 | 0 | 0 | 0 | 0 | 0 | 0 |
|                                                                                                                                                                                                                            | 0  | 0 | 0 | 0 | 0 | 0 | 0 | 0 | 0 | 0                                                                                                                                                                               | 0 | 0 | 0 | 0  | 0 | 0 | 0  | 0 | 0 | 0 | 0 | 0 | 0 | 0 | 0 | 0 | 0 |
|                                                                                                                                                                                                                            | 7  | 3 | 0 | 0 | 0 | 0 | 0 | 0 | 3 | 0                                                                                                                                                                               | 0 | 0 | 0 | 0  | 0 | 0 | 0  | 0 | 0 | 0 | 0 | 0 | 0 | 0 | 0 |   |   |
| M02255_76_000000000-ADUNE_1_1119_3185_14127                                                                                                                                                                                |    |   |   |   |   |   |   |   |   | T---AC--GT-AG-GTC-----TCA-A-G-----C-G-T--T--AT-C-CGG-AT-----TT-A--C-T--GG-GC-----GT--A-----AA---GT-----G-A-T-C-C-----G-----T-----AA---G-T-C-                                    |   |   |   |    |   |   |    |   |   |   |   |   |   |   |   |   |   |
| T-----G-T-T--T--TC--A-AA-TC--C-T-AC-G-A-----CT-C-AA-----T-C-G-T-A-G-A--A-A---G-G--G-A--A--T-----G--GA-T-A--C-----T-G-C--AG--A-T-C---T-A-G-A-A-G--T---A-TC-----TA-G-G-----G-G-T-T---AG-T-----GG--A--ATT---T-C-C-G-GT--GG-A- |    |   |   |   |   |   |   |   |   |                                                                                                                                                                                 |   |   |   |    |   |   |    |   |   |   |   |   |   |   |   |   |   |
| G-CG-GT--G---A--A-A---TG-C-GT-TG--AT-A-TC--G-G--A-A-G-G-A-AC-G-CC--GA--A--A--GC-GAA-A--G-C-A-----G--C-T-A-A---CTA--T--AG-A-A-----T-A---C-T-T--GA--CG-A-T-G--A-GG--G-A-CG-A--CA-G-T---T-TG--GG-G--AG-C-A-AA-----            |    |   |   |   |   |   |   |   |   |                                                                                                                                                                                 |   |   |   |    |   |   |    |   |   |   |   |   |   |   |   |   |   |
| --CA--GG                                                                                                                                                                                                                   |    |   |   |   |   |   |   |   |   | Bacteria(100);unclassified(100);unclassified(100);unclassified(100);unclassified(100);unclassified(100);unclassified(100);unclassified(100);unclassified(100);                  |   |   |   |    |   |   |    |   |   |   |   |   |   |   |   |   |   |
| Otu0579                                                                                                                                                                                                                    | 0  | 0 | 0 | 0 | 0 | 0 | 0 | 0 | 0 | 0                                                                                                                                                                               | 0 | 0 | 1 | 0  | 0 | 0 | 0  | 0 | 0 | 0 | 0 | 0 | 0 | 0 | 0 | 1 | 0 |
|                                                                                                                                                                                                                            | 0  | 0 | 0 | 0 | 0 | 0 | 0 | 0 | 0 | 0                                                                                                                                                                               | 0 | 0 | 0 | 0  | 0 | 0 | 0  | 0 | 0 | 0 | 0 | 0 | 0 | 0 | 0 | 0 | 0 |
|                                                                                                                                                                                                                            | 0  | 0 | 0 | 0 | 0 | 0 | 0 | 0 | 0 | 0                                                                                                                                                                               | 0 | 4 | 0 | 0  | 0 | 0 | 0  | 0 | 0 | 0 | 0 | 0 | 0 | 0 | 0 | 0 | 0 |
|                                                                                                                                                                                                                            | 0  | 0 | 0 | 0 | 0 | 0 | 0 | 0 | 0 | 0                                                                                                                                                                               | 0 | 1 | 0 | 0  | 0 | 0 | 0  | 0 | 0 | 0 | 0 | 0 | 0 | 0 | 0 |   |   |
| M02255_77_000000000-ADUT3_1_2107_6535_21828                                                                                                                                                                                |    |   |   |   |   |   |   |   |   | G---TG---CC-AG-CAG-----CCG-C-G-----G--T--A---A--GA-C-GGAGGA-----TC-C--A-A--GC-GT-----TA--T---CC-GG-AA-TC-----A-TA-G-G---G-----G--T-CA-G-A-T-----                                |   |   |   |    |   |   |    |   |   |   |   |   |   |   |   |   |   |
| AA---G-T-C-A-----G-T-G--G--TG--A-AA-GC--C-C-AT-C-G-----CT-C-AA-----C-G-G-T-G-G-A--A-C---G-G--C-C---A--T-----T-GA-T-A--C-----T-G-T--CT--G-A-C---T-T-G-A-A-T--T---A-TT-----AG-G-A-----A-G-T-A--AC-T-----AG--A--ATA---T-G-T-  |    |   |   |   |   |   |   |   |   |                                                                                                                                                                                 |   |   |   |    |   |   |    |   |   |   |   |   |   |   |   |   |   |
| A-GT--GT-A-G-CG-GT--G---A--A-A---TG-C-TT-AG--AG-A-TT--A-C--A-T-G-G-A-AT-A-CC--AA--T--T--GC-GAA-G--G-C-A-----G--G-T-T-A---CTA--C--TA-A-T-----A-T---A-T-T--GA--CG-C-T-G--A-TG--G-A-CG-A--AA-G-C---G-TG--GG-T--AG-            |    |   |   |   |   |   |   |   |   |                                                                                                                                                                                 |   |   |   |    |   |   |    |   |   |   |   |   |   |   |   |   |   |
| C-G-AA-----CA--GG                                                                                                                                                                                                          |    |   |   |   |   |   |   |   |   | Bacteria(100);Bacteroidetes(100);Flavobacteria(100);Flavobacteriales(100);Flavobacteriaceae(100);Flavobacterium(100);unclassified(100);unclassified(100);unclassified(100);     |   |   |   |    |   |   |    |   |   |   |   |   |   |   |   |   |   |



|                                                                                                                                                                                                                         |    |   |   |    |    |   |    |   |   |   |   |    |    |     |   |    |    |    |    |    |    |    |    |    |    |    |    |    |
|-------------------------------------------------------------------------------------------------------------------------------------------------------------------------------------------------------------------------|----|---|---|----|----|---|----|---|---|---|---|----|----|-----|---|----|----|----|----|----|----|----|----|----|----|----|----|----|
| Otu0580                                                                                                                                                                                                                 | 0  | 0 | 0 | 0  | 0  | 0 | 0  | 0 | 0 | 0 | 0 | 0  | 0  | 0   | 0 | 0  | 0  | 0  | 0  | 0  | 0  | 0  | 3  | 0  | 0  | 0  | 0  | 0  |
|                                                                                                                                                                                                                         | 0  | 0 | 0 | 0  | 0  | 0 | 0  | 0 | 1 | 0 | 4 | 0  | 0  | 0   | 0 | 0  | 0  | 2  | 0  | 0  | 0  | 0  | 0  | 0  | 0  | 0  | 16 |    |
|                                                                                                                                                                                                                         | 0  | 0 | 0 | 0  | 0  | 0 | 0  | 0 | 0 | 0 | 0 | 0  | 0  | 0   | 0 | 1  | 0  | 0  | 0  | 0  | 0  | 0  | 0  | 0  | 0  | 0  | 0  |    |
|                                                                                                                                                                                                                         | 0  | 0 | 0 | 0  | 0  | 0 | 0  | 0 | 0 | 0 | 0 | 0  | 0  | 0   | 0 | 0  | 2  | 0  | 0  | 0  | 1  | 0  | 0  | 0  | 23 | 0  |    |    |
| M02255_77_000000000-ADUT3_1_1117_10057_20499 T---AC---GT-AG-GGT-----GCA-A-G-----C-G-T--T-GT-C-CGG-AA-----TT-A-T-T-GG-GC-----GT-A---AA-GA-GC-TC-----G-TA-G-G-C-G-----G-T-TC-G-T-C-----                                   |    |   |   |    |    |   |    |   |   |   |   |    |    |     |   |    |    |    |    |    |    |    |    |    |    |    |    |    |
| ----GC---G-T-C-G-----G-C-T--G-TG--A-AA-AC--C-C-GG-A-G-----CT-C-AA-----C-T-C-C-G-G-G--C-C---T-G--C-A--G--T-----C-GA-T-A--C-----G-G-G-CG-G-A-C---T-T-G-A-G-T--G--T-TG-----CA-G-G-----G-G-A-G---AC-T-----GG--A--ATT---C-   |    |   |   |    |    |   |    |   |   |   |   |    |    |     |   |    |    |    |    |    |    |    |    |    |    |    |    |    |
| C-T-G-GT--GT-A-G-CG-GT--G---A--A-A--TG-C-GC-AG--AT-A-TC--A-G--G-A-G-G-A-AC-A-CC---GG--T--G--GC-GAA-G--G-C--G-----G--G-T-C-T--CTG--G--GC-A-A-----C-T--A-C-T--GA--CG-C-T-G--A-GG--A-G-CG-A--AA-G-C---G-TG--GG-            |    |   |   |    |    |   |    |   |   |   |   |    |    |     |   |    |    |    |    |    |    |    |    |    |    |    |    |    |
| G--AG-C-G-AA-----CA--GG Bacteria(100);Actinobacteria(100);Actinobacteria(100);Actinobacteridae(100);Actinomycetales(100);Frankineae(100);Geodermatophilaceae(100);Geodermatophilus(100);unclassified(100);              |    |   |   |    |    |   |    |   |   |   |   |    |    |     |   |    |    |    |    |    |    |    |    |    |    |    |    |    |
| Otu0581                                                                                                                                                                                                                 | 0  | 0 | 0 | 0  | 0  | 0 | 0  | 0 | 0 | 0 | 0 | 0  | 0  | 45  | 6 | 0  | 0  | 0  | 0  | 6  | 9  | 0  | 0  | 0  | 0  | 24 | 0  | 29 |
|                                                                                                                                                                                                                         | 21 | 0 | 0 | 0  | 0  | 0 | 0  | 0 | 0 | 0 | 0 | 0  | 0  | 157 | 0 | 47 | 0  | 0  | 0  | 0  | 0  | 0  | 0  | 0  | 0  | 0  | 0  |    |
|                                                                                                                                                                                                                         | 0  | 7 | 0 | 0  | 0  | 0 | 0  | 0 | 0 | 0 | 0 | 0  | 2  | 5   | 0 | 0  | 0  | 20 | 0  | 0  | 0  | 0  | 0  | 0  | 0  | 0  | 0  |    |
|                                                                                                                                                                                                                         | 0  | 0 | 0 | 72 | 34 | 0 | 0  | 0 | 0 | 0 | 0 | 0  | 0  | 20  | 0 | 69 | 0  | 73 | 31 | 0  | 0  | 0  | 3  | 25 | 65 | 0  |    |    |
| M02255_77_000000000-ADUT3_1_2117_12112_7260 T---AC---GG-AG-GGG-----GCT-A-G-----C--G-T--T-GT-T-CGG-AA-----TT-A--C-T-GG-GC-----GT-A---AA-GC-GC-AC-----G-TA-G-G-C-G-----G--C-TT-T-G-T-----AA-                              |    |   |   |    |    |   |    |   |   |   |   |    |    |     |   |    |    |    |    |    |    |    |    |    |    |    |    |    |
| ---G-T-C-A-----G-G-G--G-TG--A-AA-GC--C-T-GG-A-G-----CT-C-AA-----C-T-C-C-A-G-A--A-C---T-G--C-C---T-T-----T-GA-G-A--C-----T--G-C--AG--C-G-C---T-T-G-A-A-T--C---C-GG---GA-G-A-----G-G-T-A--AG-T-----GG--A--ATT---C-C-G-A-  |    |   |   |    |    |   |    |   |   |   |   |    |    |     |   |    |    |    |    |    |    |    |    |    |    |    |    |    |
| GT--GT-A-G-AG-GT--G---A--A-A--TT-C-GT-AG--AT-A-TT--C-G--G-A-A-G-A-AC-A-CC---AG--T--G--GC-GAA-G--G-C--G-----G--C-T-T-A--CTG--G--AC-C-G-----G-G--A-T-T-GA--CG-C-T-G--A-GG--T-G-CG-A--AA-G-C---G-TG--GG-G--AG-             |    |   |   |    |    |   |    |   |   |   |   |    |    |     |   |    |    |    |    |    |    |    |    |    |    |    |    |    |
| C-A-AA-----CA--GG Bacteria(100);Proteobacteria(100);Alphaproteobacteria(100);Sphingomonadales(100);unclassified(100);unclassified(100);unclassified(100);unclassified(100);unclassified(100);                           |    |   |   |    |    |   |    |   |   |   |   |    |    |     |   |    |    |    |    |    |    |    |    |    |    |    |    |    |
| Otu0582                                                                                                                                                                                                                 | 0  | 0 | 0 | 0  | 0  | 0 | 0  | 0 | 0 | 0 | 0 | 0  | 0  | 2   | 0 | 0  | 0  | 0  | 0  | 0  | 0  | 0  | 0  | 0  | 0  | 0  | 0  | 0  |
|                                                                                                                                                                                                                         | 0  | 0 | 0 | 0  | 0  | 0 | 0  | 0 | 4 | 3 | 1 | 18 | 0  | 10  | 2 | 0  | 26 | 0  | 0  | 0  | 44 | 1  | 10 | 8  | 0  | 0  | 0  | 10 |
|                                                                                                                                                                                                                         | 0  | 0 | 0 | 0  | 0  | 0 | 0  | 0 | 0 | 0 | 0 | 0  | 0  | 0   | 5 | 1  | 0  | 0  | 0  | 0  | 0  | 0  | 0  | 0  | 0  | 0  | 0  |    |
|                                                                                                                                                                                                                         | 0  | 0 | 0 | 0  | 0  | 0 | 0  | 0 | 0 | 0 | 0 | 0  | 0  | 0   | 0 | 0  | 0  | 0  | 0  | 0  | 0  | 0  | 0  | 0  | 0  | 0  |    |    |
| M02255_76_000000000-ADUNE_1_1118_11936_24395 C---A---GC-A-GCC-----GCG-G-T-----A-A-T--A--CG-G-AGG-GT-----GC-A--A-G--CG-TT-----AC--C---CG-GA-AT-CA-----C-TG-G-G-C-G-----G--A-CA-C-T-T-----                                |    |   |   |    |    |   |    |   |   |   |   |    |    |     |   |    |    |    |    |    |    |    |    |    |    |    |    |    |
| ----AA---G-T-C-T-----G-G-T--T--TT--A-AA-GA--C-C-GG-G-G-----CT-C-AA-----C-C-C-C-G-G-G--C-A---T-G--G-A--C--T-----G--GG-T-A--C-----T--G-G--GT--G-T-C---T-G-G-A-C-C--T--C-TG---GA-G-A-----G-A-G-A--AC-T-----GG--A--ATT---C- |    |   |   |    |    |   |    |   |   |   |   |    |    |     |   |    |    |    |    |    |    |    |    |    |    |    |    |    |
| C-T-G-GT--GT-A-G-CG-GT--G---G--A-A--TG-C-GT-AG--AT-A-CC--A-G--G-A-G-G-A-AC-A-CC---AA--T--G--GC-GAA-G--G-C--A-----G--G-T-T-C---TTG--G--AC-A-G-----A-A--G-G-T-GA--CG-C-T-G--A-GG--C-G-CG-A--AA-G-T---G-TG--GG-            |    |   |   |    |    |   |    |   |   |   |   |    |    |     |   |    |    |    |    |    |    |    |    |    |    |    |    |    |
| G--AG-C-G-AA-----CC--GG Bacteria(100);Deinococcus-Thermus(100);Deinococcales(100);Deinococcaceae(100);Deinococcus(100);unclassified(100);unclassified(100);unclassified(100);unclassified(100);                         |    |   |   |    |    |   |    |   |   |   |   |    |    |     |   |    |    |    |    |    |    |    |    |    |    |    |    |    |
| Otu0583                                                                                                                                                                                                                 | 0  | 0 | 0 | 0  | 0  | 0 | 0  | 0 | 0 | 0 | 0 | 0  | 0  | 0   | 0 | 0  | 0  | 0  | 0  | 23 | 0  | 15 | 0  | 0  | 0  | 0  | 0  | 0  |
|                                                                                                                                                                                                                         | 1  | 0 | 0 | 0  | 0  | 0 | 0  | 0 | 0 | 0 | 0 | 0  | 0  | 0   | 0 | 0  | 0  | 0  | 0  | 0  | 0  | 0  | 0  | 0  | 0  | 0  | 0  |    |
|                                                                                                                                                                                                                         | 0  | 0 | 0 | 0  | 0  | 0 | 0  | 0 | 0 | 0 | 0 | 0  | 16 | 5   | 1 | 0  | 0  | 0  | 0  | 0  | 0  | 0  | 0  | 0  | 0  | 0  | 0  |    |
|                                                                                                                                                                                                                         | 0  | 0 | 0 | 0  | 0  | 0 | 0  | 0 | 0 | 0 | 0 | 0  | 0  | 0   | 2 | 0  | 0  | 0  | 0  | 0  | 0  | 0  | 0  | 0  | 0  | 0  |    |    |
| M02255_76_000000000-ADUNE_1_2111_17527_23784 C---TC---GC-AG-AAT-----AAG-CACC---G--G--C--T--AACT-CTG-TG-----CC-A--G-C--AG-CC-----GC--G-----GT-AA-TA-CA-----G-AG-G-G-T-G-----C--A-AG-T-G-T---                             |    |   |   |    |    |   |    |   |   |   |   |    |    |     |   |    |    |    |    |    |    |    |    |    |    |    |    |    |
| -----TA---A-T-C-G-----G-A-T--G-TG--A-AA-TC--C-C-TG-A-G-----CT-T-AA-----C-T-T-A-G-G-A-A-T---T-G--C-A--T--A-----C--GA-T-A--C-----T--G-G--GA--G-A-C---T-A-G-A-G-T--A---T-GG---GA-G-A-----G-G-A-T---GG-T-----AG--A--ATT---  |    |   |   |    |    |   |    |   |   |   |   |    |    |     |   |    |    |    |    |    |    |    |    |    |    |    |    |    |
| C-C-A-G-GT--GT-A-G-CG-GT--G---A--A-A--TG-C-GT-AG--AG-A-TC--T-G--G-A-G-G-A-AT-A-CC---GA--T--G--GC-GAA-G--G-C--A-----G--C-C-A-T---CTG--G--CC-T-A-----A-T---A-C-T--GA--CA-C-T-G--A-GG--T-A-CG-A--AA-G-C---A-TG--GG-        |    |   |   |    |    |   |    |   |   |   |   |    |    |     |   |    |    |    |    |    |    |    |    |    |    |    |    |    |
| G--AG-C-A-AA-----CA--GG Bacteria(100);Proteobacteria(100);Gammaproteobacteria(100);Pseudomonadales(100);Moraxellaceae(100);Acinetobacter(100);unclassified(100);unclassified(100);unclassified(100);                    |    |   |   |    |    |   |    |   |   |   |   |    |    |     |   |    |    |    |    |    |    |    |    |    |    |    |    |    |
| Otu0584                                                                                                                                                                                                                 | 0  | 0 | 0 | 0  | 0  | 0 | 0  | 0 | 0 | 0 | 0 | 0  | 0  | 0   | 0 | 0  | 0  | 0  | 0  | 0  | 0  | 0  | 0  | 0  | 0  | 0  | 0  | 0  |
|                                                                                                                                                                                                                         | 0  | 0 | 0 | 0  | 0  | 0 | 42 | 0 | 0 | 0 | 0 | 0  | 0  | 0   | 0 | 0  | 0  | 0  | 0  | 0  | 0  | 0  | 0  | 0  | 0  | 0  | 0  |    |
|                                                                                                                                                                                                                         | 0  | 0 | 0 | 0  | 0  | 0 | 0  | 0 | 0 | 0 | 0 | 0  | 0  | 0   | 0 | 1  | 0  | 0  | 0  | 0  | 0  | 0  | 0  | 0  | 0  | 0  | 0  |    |
|                                                                                                                                                                                                                         | 0  | 0 | 0 | 0  | 0  | 0 | 0  | 0 | 0 | 0 | 0 | 0  | 0  | 0   | 0 | 0  | 0  | 0  | 0  | 0  | 0  | 0  | 0  | 0  | 0  | 0  |    |    |
| M02255_76_000000000-ADUNE_1_1109_15746_16540 T---AC---GT-GC-CAGC-----AGC-C-G-----CG-G--T--A--AT-A-CGT-AG-----GT-G--G-C--AA-GC-----GT--T-----GT-CC-G--GA-----T-TT-A-C-T-G-----G--G-CG-T-T-A-----                         |    |   |   |    |    |   |    |   |   |   |   |    |    |     |   |    |    |    |    |    |    |    |    |    |    |    |    |    |
| -----AA---GAG-C-G-----C-G-C--A--GG--A-AA-GC--C-C-CC-G-G-----CT-C-AA-----C-T-G-G-G-G-A--G-G---G-T--C-A--C--G-----C--GA-T-A--C-----T--G-A--TC--G-A-C---T-C-G-A-A-G--G--C-AG---GA-G-A-----G-G-G-T---AG-T-----GG--A--ATT--- |    |   |   |    |    |   |    |   |   |   |   |    |    |     |   |    |    |    |    |    |    |    |    |    |    |    |    |    |
| -C-C-C-G-GT--GT-A-G-TG-GT--G---A--A-A--TG-C-GT-AG--AT-A-TC--G-G--G-A-G-G-A-AC-A-CC---AG--T--G--GC-GAA-G--G-C--G-----A--C-T-A-C---CTG--G--CC-T-GT-----T-T---C-T-T--GA--CG-C-T-G--A-GG--C-G-CG-A--AA-G-C---T-AG--         |    |   |   |    |    |   |    |   |   |   |   |    |    |     |   |    |    |    |    |    |    |    |    |    |    |    |    |    |
| GG-G--AG-C-A-AA-----CG--GG Bacteria(100);Chloroflexi(100);KD4-96(100);unclassified(100);unclassified(100);unclassified(100);unclassified(100);unclassified(100);unclassified(100);                                      |    |   |   |    |    |   |    |   |   |   |   |    |    |     |   |    |    |    |    |    |    |    |    |    |    |    |    |    |



[illegible]



|                                                                                                                                                                                                                                                                                                                                                                                                                                                                                                                                                                                                                                                                                                                                                                                                                                                                                     |   |   |   |   |   |    |    |    |   |   |   |   |   |   |    |    |   |   |    |   |   |   |   |   |   |   |   |    |
|-------------------------------------------------------------------------------------------------------------------------------------------------------------------------------------------------------------------------------------------------------------------------------------------------------------------------------------------------------------------------------------------------------------------------------------------------------------------------------------------------------------------------------------------------------------------------------------------------------------------------------------------------------------------------------------------------------------------------------------------------------------------------------------------------------------------------------------------------------------------------------------|---|---|---|---|---|----|----|----|---|---|---|---|---|---|----|----|---|---|----|---|---|---|---|---|---|---|---|----|
| Otu0590                                                                                                                                                                                                                                                                                                                                                                                                                                                                                                                                                                                                                                                                                                                                                                                                                                                                             | 0 | 0 | 0 | 0 | 0 | 0  | 0  | 0  | 0 | 0 | 0 | 0 | 0 | 0 | 0  | 0  | 0 | 0 | 0  | 0 | 0 | 0 | 0 | 0 | 0 | 0 | 0 | 0  |
|                                                                                                                                                                                                                                                                                                                                                                                                                                                                                                                                                                                                                                                                                                                                                                                                                                                                                     | 0 | 0 | 0 | 0 | 0 | 0  | 73 | 64 | 0 | 0 | 0 | 0 | 0 | 0 | 0  | 0  | 0 | 0 | 0  | 0 | 0 | 0 | 0 | 0 | 0 | 0 | 0 | 0  |
|                                                                                                                                                                                                                                                                                                                                                                                                                                                                                                                                                                                                                                                                                                                                                                                                                                                                                     | 0 | 0 | 0 | 0 | 0 | 0  | 0  | 0  | 0 | 0 | 0 | 0 | 0 | 0 | 0  | 0  | 0 | 0 | 0  | 0 | 0 | 0 | 0 | 0 | 0 | 0 | 0 | 0  |
|                                                                                                                                                                                                                                                                                                                                                                                                                                                                                                                                                                                                                                                                                                                                                                                                                                                                                     | 0 | 0 | 0 | 0 | 0 | 0  | 0  | 0  | 0 | 0 | 0 | 0 | 0 | 0 | 0  | 0  | 0 | 0 | 0  | 0 | 0 | 0 | 0 | 0 | 0 | 0 | 0 | 0  |
| M02255_77_000000000-ADUT3_1_1119_5513_12373 T---AC---GT-AG-GGG-----GCA-A-G-----C--G--T---T--GT-C-CGG-AA-----TT-A--T-T--GG-GC-----GT--A-----AA-GA-GC-TC-----G-TA-G-G-C-G-----G--C-TC-A-G-C-----AA-<br>---G-T-C-G-----G-C-T--G--TG--A-AA-TC--C-C-GA-G-G----CT-T-AA-----C-C-T-C-G-G-A--A-C---T-G--C-A--G-T-----C--GA-T-A--C-----T--G-C--TGT-G-G-C---T-A-G-A-G-T-C---T-GG----TA-G-A-----G-G-A-G---AA-T-----GG--A--ATT---C-C-C-G-<br>GT--GT-A-G-CG-GT--G---A--A---TG-C-GC-AG--AT-A-TC--G-G--G-A-G-G-A-AC-A-CC--AG--T--A--GC-GAA-G--G-C-G-----G--T-T-C-T---CTG--G--GC-C-A-----G-T---A-C-T--GA--CG-C-T-G--A-GG--A-G-CG-A--AA-G-C---G-TG--GG-G--AG-<br>C-A-AA-----CA--GG     Bacteria(100);unclassified(100);unclassified(100);unclassified(100);unclassified(100);unclassified(100);unclassified(100);unclassified(100);unclassified(100);                                                 |   |   |   |   |   |    |    |    |   |   |   |   |   |   |    |    |   |   |    |   |   |   |   |   |   |   |   |    |
| Otu0591                                                                                                                                                                                                                                                                                                                                                                                                                                                                                                                                                                                                                                                                                                                                                                                                                                                                             | 0 | 0 | 0 | 0 | 0 | 0  | 0  | 0  | 0 | 0 | 0 | 0 | 0 | 0 | 0  | 0  | 0 | 0 | 0  | 0 | 0 | 0 | 1 | 0 | 0 | 0 | 0 | 0  |
|                                                                                                                                                                                                                                                                                                                                                                                                                                                                                                                                                                                                                                                                                                                                                                                                                                                                                     | 0 | 0 | 0 | 0 | 0 | 0  | 0  | 0  | 0 | 0 | 0 | 0 | 0 | 0 | 0  | 0  | 0 | 0 | 18 | 0 | 0 | 4 | 0 | 0 | 0 | 0 | 0 | 80 |
|                                                                                                                                                                                                                                                                                                                                                                                                                                                                                                                                                                                                                                                                                                                                                                                                                                                                                     | 0 | 0 | 0 | 0 | 0 | 0  | 0  | 0  | 0 | 0 | 0 | 0 | 0 | 0 | 0  | 0  | 0 | 0 | 0  | 0 | 0 | 0 | 0 | 0 | 0 | 0 | 0 | 0  |
|                                                                                                                                                                                                                                                                                                                                                                                                                                                                                                                                                                                                                                                                                                                                                                                                                                                                                     | 4 | 0 | 0 | 0 | 0 | 17 | 0  | 0  | 0 | 0 | 3 | 0 | 0 | 0 | 0  | 37 | 0 | 0 | 0  | 0 | 0 | 0 | 0 | 0 | 0 | 0 | 0 | 0  |
| M02255_77_000000000-ADUT3_1_1115_15462_7256 T---AC---GT-AG-GGC-----GCA-A-G-----C--G--T---T--GT-C-CGG-AA-----TT-A--T-T--GG-GC-----GT--A-----AA-GA-GC-TC-----G-TA-G-G-C-G-----G--C-TT-G-T-C-----GC-<br>---G-T-C-T-----G-C-G--G--TG--A-AA-GC--C-C-GG-G-G----CT-T-AA-----C-T-C-C-G-G-G--T-G---T-G--C-A--G-T-----G--GG-T-A--C-----G--G-G--CA-G-G-C---T-A-G-A-G-T-G---C-AG----TA-G-G-----G-G-T-A--AC-T-----GG--A--ATT---C-C-T-G-<br>GT--GT-A-G-CG-GT--G---A--A---TG-C-GC-AG--AT-A-TC--A-G--G-A-G-G-A-AC-A-CC--GA--T--G--GC-GAA-G--G-C-A-----G--G-T-T-A--CTG--G--GC-T-G-----T-T---A-C-T--GA--CG-C-T-G--A-GG--A-G-CG-A--AA-G-C---A-TG--GG-G--AG-<br>C-G-AA-----CA--GG     Bacteria(100);Actinobacteria(100);Actinobacteria(100);Actinobacteridae(100);Actinomycetales(100);Micrococcineae(100);Micrococcaceae(100);Kocuria(99);unclassified(99);                                            |   |   |   |   |   |    |    |    |   |   |   |   |   |   |    |    |   |   |    |   |   |   |   |   |   |   |   |    |
| Otu0592                                                                                                                                                                                                                                                                                                                                                                                                                                                                                                                                                                                                                                                                                                                                                                                                                                                                             | 0 | 0 | 0 | 0 | 0 | 0  | 0  | 0  | 0 | 0 | 0 | 0 | 0 | 0 | 0  | 0  | 0 | 0 | 0  | 0 | 0 | 0 | 4 | 0 | 0 | 0 | 0 | 0  |
|                                                                                                                                                                                                                                                                                                                                                                                                                                                                                                                                                                                                                                                                                                                                                                                                                                                                                     | 0 | 0 | 0 | 0 | 0 | 0  | 0  | 0  | 0 | 0 | 0 | 0 | 0 | 0 | 0  | 0  | 0 | 0 | 51 | 0 | 0 | 0 | 0 | 0 | 0 | 0 | 0 | 0  |
|                                                                                                                                                                                                                                                                                                                                                                                                                                                                                                                                                                                                                                                                                                                                                                                                                                                                                     | 0 | 0 | 0 | 0 | 0 | 0  | 0  | 0  | 0 | 0 | 0 | 0 | 0 | 0 | 0  | 0  | 0 | 0 | 0  | 0 | 0 | 7 | 0 | 0 | 0 | 0 | 0 | 0  |
|                                                                                                                                                                                                                                                                                                                                                                                                                                                                                                                                                                                                                                                                                                                                                                                                                                                                                     | 0 | 0 | 0 | 0 | 0 | 0  | 0  | 0  | 0 | 0 | 0 | 0 | 0 | 0 | 0  | 0  | 0 | 0 | 0  | 0 | 0 | 0 | 0 | 0 | 0 | 0 | 0 | 0  |
| M02255_77_000000000-ADUT3_1_1110_25175_18753                    T---AC---GT-AG-GAT-----CCA-A-G-----C--G--T---T--AT-C-CGG-AG-----TG-A--C-T--GG-GC-----GT--A-----AA-GA-GTTGC-----G-TA-G-G-T-G-----G--T-TA-T-A-T-----<br>-----AA---G-T-G-A-----A-T-A--G--TG--A-AA-TC--T-G-GC-G-G----CT-C-AA-----C-C-G-T-ACA-G--G-C---T-A--T-T--A--T-----T--CA-A-A--C-----T--G-T--AT--A-A-C---T-C-G-A-G-A--A--T-GG----TA-G-A-----G-G-T-A--AC-T-----GG--A--ATT---T-<br>C-T-T-GT--GT-A-G-GA-GT--G---A--A---TC-C-GT-AG--AT-A-TA--A-G--A-A-G-G-A-AC-A-CC--AA--T--G--GC-GTA-G--G-C-A-----G--G-T-T-A--CTG--G--AC-C-A-----T-T---T-C-T--GA--CA-C-T-G--A-GG--C-A-CG-A--AA-G-C---G-TG--GG-G--<br>AG-C-G-AA-----CC--GG                    Bacteria(100);Candidate_division_TM7(100);unclassified(100);unclassified(100);unclassified(100);unclassified(100);unclassified(100);unclassified(100);unclassified(100); |   |   |   |   |   |    |    |    |   |   |   |   |   |   |    |    |   |   |    |   |   |   |   |   |   |   |   |    |
| Otu0593                                                                                                                                                                                                                                                                                                                                                                                                                                                                                                                                                                                                                                                                                                                                                                                                                                                                             | 0 | 0 | 0 | 0 | 0 | 0  | 0  | 0  | 0 | 0 | 0 | 0 | 0 | 0 | 0  | 0  | 0 | 0 | 0  | 0 | 0 | 0 | 0 | 0 | 0 | 0 | 0 | 0  |
|                                                                                                                                                                                                                                                                                                                                                                                                                                                                                                                                                                                                                                                                                                                                                                                                                                                                                     | 0 | 0 | 0 | 0 | 0 | 0  | 0  | 0  | 0 | 0 | 0 | 0 | 0 | 0 | 0  | 0  | 0 | 0 | 0  | 0 | 0 | 0 | 0 | 0 | 0 | 0 | 0 | 0  |
|                                                                                                                                                                                                                                                                                                                                                                                                                                                                                                                                                                                                                                                                                                                                                                                                                                                                                     | 0 | 0 | 0 | 0 | 0 | 0  | 0  | 0  | 0 | 0 | 0 | 0 | 0 | 0 | 16 | 14 | 0 | 0 | 0  | 0 | 0 | 0 | 0 | 0 | 0 | 0 | 0 | 0  |
|                                                                                                                                                                                                                                                                                                                                                                                                                                                                                                                                                                                                                                                                                                                                                                                                                                                                                     | 0 | 0 | 0 | 0 | 0 | 0  | 0  | 0  | 0 | 2 | 0 | 0 | 0 | 0 | 0  | 0  | 0 | 0 | 0  | 0 | 0 | 0 | 0 | 0 | 0 | 0 | 0 | 0  |
| M02255_76_000000000-ADUNE_1_2106_9517_19446 T---CG---GC-TA-ACT-----CCG-T-GC----C--A--G---C--AG-C-CGC-GG-----TA-A--T-A--CG-GA-----GG--A-----TT-CG-AG-CG-----T-TA-T-C-C-G-----G--A-CT-C-T-T-----ACA-<br>---G-T-C-A-----G-C-G--G--TG--A-AA-TG--T-C-TG-G-G----CT-T-AC-----C-C-T-A-G-G-A--A-T---T-G--C-C---G--T-----T--GA-T-A--C-----T--G-G--GA--G-T-C---T-T-G-G-A-T--A--A-GC-----AT-A-A-----G-G-A-C---GG-C-----GG--A--ATG---C-G-T-A-<br>GT--GT-A-G-CG-GT--G---A--A---TG-C-TT-AG--AT-A-TT--A-C--G-T-A-G-A-AG-A-CC---AA--T--T--GC-GAA-G--G-C-A-----G--C-T-G-T---CTG--G--GT-C-T-----T-T---A-T-C--GA--CG-C-T-C--A-AG--C-A-CG-A--AA-G-C---G-TG--GG-G--AG-C-<br>A-AA-----CA--GG                    Bacteria(100);unclassified(100);unclassified(100);unclassified(100);unclassified(100);unclassified(100);unclassified(100);unclassified(100);unclassified(100);                             |   |   |   |   |   |    |    |    |   |   |   |   |   |   |    |    |   |   |    |   |   |   |   |   |   |   |   |    |
| Otu0594                                                                                                                                                                                                                                                                                                                                                                                                                                                                                                                                                                                                                                                                                                                                                                                                                                                                             | 0 | 0 | 0 | 0 | 0 | 0  | 0  | 0  | 0 | 0 | 0 | 0 | 0 | 0 | 0  | 0  | 0 | 0 | 0  | 0 | 0 | 0 | 0 | 0 | 0 | 0 | 0 | 0  |
|                                                                                                                                                                                                                                                                                                                                                                                                                                                                                                                                                                                                                                                                                                                                                                                                                                                                                     | 0 | 0 | 0 | 0 | 0 | 0  | 0  | 0  | 0 | 0 | 0 | 0 | 0 | 0 | 0  | 0  | 0 | 0 | 0  | 0 | 0 | 0 | 0 | 0 | 0 | 0 | 0 | 0  |
|                                                                                                                                                                                                                                                                                                                                                                                                                                                                                                                                                                                                                                                                                                                                                                                                                                                                                     | 0 | 0 | 0 | 0 | 0 | 0  | 0  | 0  | 0 | 0 | 0 | 0 | 0 | 0 | 27 | 28 | 0 | 0 | 0  | 0 | 0 | 0 | 0 | 0 | 6 | 0 | 0 | 1  |
|                                                                                                                                                                                                                                                                                                                                                                                                                                                                                                                                                                                                                                                                                                                                                                                                                                                                                     | 0 | 0 | 0 | 0 | 0 | 0  | 0  | 0  | 0 | 3 | 0 | 0 | 0 | 0 | 0  | 0  | 0 | 0 | 0  | 0 | 0 | 0 | 0 | 0 | 0 | 0 | 0 | 0  |
| M02255_77_000000000-ADUT3_1_1118_4551_18475 T---AA---GC-AC-CGG-----CTA-A-C-----T--A--C---G--TG-C-CAG-CA-----GC-C--G-C--GG-TA-----AT--A-----CG-TA-GG-GT-----G-CA-A-G-C-G-----T--TAAT-C-G-G-----<br>AAT---T-A-C-T-----G-A-T--G--TG--A-AA-TC--C-C-CG-G-G----CT-T-AA-----C-C-T-G-G-G-A--A-C---T-G--C-A--T--T-----G--GT-G-A--C-----T--G-C--AA--G-G-C---T-A-G-A-G-T--G---T-GT----CA-G-A-----G-G-G-A--GG-T-----GG--A--ATT---C-C-<br>G-C-AT--GT-A-G-CA-GT--G---A--A---TG-C-GT-AG--AT-A-TG--C-G--G-A-G-G-A-AC-A-CC--GA--T--G--GC-GAA-G--G-C-A-----G--C-C-T-C---CTG--G--GA-T-A-----A-C---A-C-T--GA--CG-C-T-C--A-TG--C-A-CG-A--AA-G-C---G-TG--GG-G--<br>AG-C-A-AA-----CA--GG                    Bacteria(100);Proteobacteria(100);Betaproteobacteria(100);Burkholderiales(100);Alcaligenaceae(54);unclassified(54);unclassified(54);unclassified(54);unclassified(54);                         |   |   |   |   |   |    |    |    |   |   |   |   |   |   |    |    |   |   |    |   |   |   |   |   |   |   |   |    |



|         |                                              |    |   |   |    |    |    |   |   |   |    |   |   |   |                                                                                                                                                                                                                                                                                                                                                                                                                                                                                                                                                                                           |   |   |   |     |   |   |   |   |   |   |   |   |  |                                                                                                                                                                            |  |  |  |  |  |  |  |  |  |  |  |  |  |
|---------|----------------------------------------------|----|---|---|----|----|----|---|---|---|----|---|---|---|-------------------------------------------------------------------------------------------------------------------------------------------------------------------------------------------------------------------------------------------------------------------------------------------------------------------------------------------------------------------------------------------------------------------------------------------------------------------------------------------------------------------------------------------------------------------------------------------|---|---|---|-----|---|---|---|---|---|---|---|---|--|----------------------------------------------------------------------------------------------------------------------------------------------------------------------------|--|--|--|--|--|--|--|--|--|--|--|--|--|
| Otu0595 | 0                                            | 0  | 0 | 0 | 0  | 0  | 0  | 0 | 0 | 0 | 0  | 0 | 0 | 0 | 0                                                                                                                                                                                                                                                                                                                                                                                                                                                                                                                                                                                         | 0 | 0 | 0 | 0   | 0 | 0 | 0 | 0 | 0 | 0 | 0 | 0 |  |                                                                                                                                                                            |  |  |  |  |  |  |  |  |  |  |  |  |  |
|         | 0                                            | 0  | 0 | 0 | 0  | 0  | 0  | 0 | 0 | 0 | 0  | 0 | 0 | 0 | 0                                                                                                                                                                                                                                                                                                                                                                                                                                                                                                                                                                                         | 0 | 0 | 0 | 137 | 0 | 0 | 0 | 0 | 0 | 0 | 0 | 0 |  |                                                                                                                                                                            |  |  |  |  |  |  |  |  |  |  |  |  |  |
|         | 0                                            | 0  | 0 | 0 | 0  | 0  | 0  | 0 | 0 | 0 | 0  | 0 | 0 | 0 | 0                                                                                                                                                                                                                                                                                                                                                                                                                                                                                                                                                                                         | 0 | 0 | 0 | 0   | 0 | 0 | 0 | 0 | 0 | 0 | 0 | 0 |  |                                                                                                                                                                            |  |  |  |  |  |  |  |  |  |  |  |  |  |
|         | 0                                            | 0  | 0 | 0 | 0  | 0  | 0  | 0 | 0 | 0 | 0  | 0 | 0 | 0 | 0                                                                                                                                                                                                                                                                                                                                                                                                                                                                                                                                                                                         | 0 | 0 | 0 | 0   | 0 | 0 | 0 | 0 | 0 | 0 | 0 | 0 |  |                                                                                                                                                                            |  |  |  |  |  |  |  |  |  |  |  |  |  |
|         | M02255_77_000000000-ADUT3_1_1110_17124_12915 |    |   |   |    |    |    |   |   |   |    |   |   |   | G---AC---GT-AG-GAT-----GCA-A-G-----C-G--T---T-GT-C-CGG-AA-----TC-A--T-T-GG-GC-----GT--A----AA-GC-GT-TC-----G-TA-G-G-C-G-----G--C-AT-G-T-C-----AA---G-T-C-T-----G-A-T--G--TT--A-AA-GC--C-C-GG-A-G----CT-C-AA-----C-T-C-C-G-G-T--T-C--G-G--C-A--T-T-----G--GA-T-A--C-----T-G-G--CA--A-G-C---T-A-G-A-G-T--G--C-AA---TA-G-A-----G-G-T-A--GG-G-----GG-A--ATT---C-T-A-GT--GT-A-G-CG-GT--G---A-A-A---TG-C-GT-AG--AT-A-TT--A-G--G-A-G-G-A-AC-A-CC---GG-T--G--GC-GAA-A-G-C-G-----C--C-C-T-A---CTG-G--GT-T-G-----T-A--A-C-T-GA--CG-C-T-G--A-GG--A-A-CG-A-AA-G-C---C-AG--GG-T--AG-C-A-AA-----TG--GG  |   |   |   |     |   |   |   |   |   |   |   |   |  | Bacteria(100);unclassified(100);unclassified(100);unclassified(100);unclassified(100);unclassified(100);unclassified(100);unclassified(100);unclassified(100);             |  |  |  |  |  |  |  |  |  |  |  |  |  |
| Otu0596 | 0                                            | 0  | 0 | 0 | 0  | 0  | 0  | 0 | 0 | 0 | 0  | 0 | 0 | 0 | 0                                                                                                                                                                                                                                                                                                                                                                                                                                                                                                                                                                                         | 0 | 0 | 0 | 0   | 0 | 0 | 0 | 0 | 0 | 0 | 0 | 0 |  |                                                                                                                                                                            |  |  |  |  |  |  |  |  |  |  |  |  |  |
|         | 0                                            | 0  | 0 | 0 | 0  | 0  | 0  | 0 | 0 | 0 | 0  | 0 | 0 | 0 | 0                                                                                                                                                                                                                                                                                                                                                                                                                                                                                                                                                                                         | 0 | 0 | 0 | 0   | 0 | 0 | 0 | 0 | 0 | 0 | 0 | 0 |  |                                                                                                                                                                            |  |  |  |  |  |  |  |  |  |  |  |  |  |
|         | 0                                            | 0  | 0 | 0 | 0  | 0  | 25 | 0 | 0 | 0 | 0  | 0 | 0 | 6 | 14                                                                                                                                                                                                                                                                                                                                                                                                                                                                                                                                                                                        | 0 | 0 | 0 | 0   | 0 | 0 | 0 | 0 | 0 | 0 | 0 | 0 |  |                                                                                                                                                                            |  |  |  |  |  |  |  |  |  |  |  |  |  |
|         | 17                                           | 15 | 0 | 0 | 10 | 0  | 0  | 0 | 0 | 0 | 0  | 0 | 0 | 0 | 0                                                                                                                                                                                                                                                                                                                                                                                                                                                                                                                                                                                         | 0 | 0 | 0 | 0   | 0 | 0 | 0 | 0 | 0 | 0 | 0 | 0 |  |                                                                                                                                                                            |  |  |  |  |  |  |  |  |  |  |  |  |  |
|         | M02255_76_000000000-ADUNE_1_1108_17572_2975  |    |   |   |    |    |    |   |   |   |    |   |   |   | C---GG---CT-AA-CT-----ACG-T-G-----C-C-A--G--CA-G-CCG-CG-----GT-A--A-T-AC-GT-----AG--G---TG-GC-GA-GC-----G-TT-GTC-C-G-----G--A-CA-T-A-T-----AA---G-T-C-C-----A-T-C--T--TA--A-AA-GT--G-C-GG-G-G----CT-C-AA-----C-C-C-C-G-T-G-A-----G-G--G-G--A-T-----G--GA-A-A--C-----T-G-T--AT--G-C-C---T-T-G-A-G-T--G--C-AG---GA-G-A-----G-G-A-A--AG-C-----GG--A--ATT---C-C-C-A-GT--GT-A-G-CG-GT--G---A-A-A---TG-C-GT-AG--AT-A-TT--G-G--G-A-G-G-A-AC-A-CC---AG--T--G--GC-GAA-G-G-C-G-----G--C-T-T-T---CTG-G--AC-T-G-----C-A--A-C-T-GA--CG-C-T-G--A-GG--C-T-CG-A-AA-G-C---C-AG--GG-G--AG-C-G-AA-----CG--GG |   |   |   |     |   |   |   |   |   |   |   |   |  | Bacteria(100);Firmicutes(100);Clostridia(100);Clostridiales(100);Veillonellaceae(100);Selenomonas(100);unclassified(100);unclassified(100);unclassified(100);              |  |  |  |  |  |  |  |  |  |  |  |  |  |
| Otu0597 | 0                                            | 0  | 0 | 0 | 0  | 0  | 0  | 0 | 0 | 0 | 0  | 0 | 0 | 0 | 0                                                                                                                                                                                                                                                                                                                                                                                                                                                                                                                                                                                         | 0 | 0 | 0 | 1   | 0 | 0 | 0 | 0 | 0 | 0 | 0 | 0 |  |                                                                                                                                                                            |  |  |  |  |  |  |  |  |  |  |  |  |  |
|         | 0                                            | 1  | 0 | 0 | 0  | 0  | 0  | 0 | 0 | 0 | 0  | 0 | 0 | 2 | 0                                                                                                                                                                                                                                                                                                                                                                                                                                                                                                                                                                                         | 0 | 0 | 0 | 0   | 0 | 0 | 0 | 0 | 0 | 0 | 0 | 0 |  |                                                                                                                                                                            |  |  |  |  |  |  |  |  |  |  |  |  |  |
|         | 0                                            | 0  | 0 | 0 | 0  | 0  | 1  | 0 | 0 | 0 | 0  | 0 | 0 | 0 | 1                                                                                                                                                                                                                                                                                                                                                                                                                                                                                                                                                                                         | 0 | 0 | 0 | 3   | 0 | 0 | 0 | 0 | 2 | 0 | 0 | 3 |  |                                                                                                                                                                            |  |  |  |  |  |  |  |  |  |  |  |  |  |
|         | 0                                            | 1  | 0 | 0 | 6  | 7  | 0  | 0 | 0 | 0 | 13 | 0 | 0 | 0 | 0                                                                                                                                                                                                                                                                                                                                                                                                                                                                                                                                                                                         | 0 | 0 | 0 | 0   | 0 | 0 | 0 | 0 | 0 | 0 | 0 | 0 |  |                                                                                                                                                                            |  |  |  |  |  |  |  |  |  |  |  |  |  |
|         | M02255_76_000000000-ADUNE_1_2111_5790_10049  |    |   |   |    |    |    |   |   |   |    |   |   |   | T---AC---GT-AG-GGG-----GCT-A-G-----C-G--T---T-AT-C-CGG-AT-----TT-A--C-T-GG-GC-----GT--A----AA-----G-T-G-G-T-----G----C-G-T-----AG---G-T-C-G-----G-T-G--G--TT--A-AA-GG--C-T-AC-G-G----CT-C-AA-----C-C-G-T-A-G-T-A-----A-G--C-C--G-C-----C-GA-A-A--C-----T-G-G--AG--G-A-C---T-T-G-A-G-T--G--C-AG---GA-G-A-----G-G-A-A--AG-T-----GG--A--ATT---C-C-C-A-GT--GT-A-G-CG-GT--G---A-A-A---TG-C-GT-AG--AT-A-TT--G-G--G-A-G-G-A-AC-A-CC---AG--T--A--GC-GAA-G-G-C-G-----G--C-T-T-T---CTG-G--AC-T-G-----C-A--A-C-T-GA--CA-C-T-G--A-GG--C-A-CG-A-AA-G-C---G-TG--GG-T--AG-C-A-AA-----CA--GG              |   |   |   |     |   |   |   |   |   |   |   |   |  | Bacteria(100);Firmicutes(100);Clostridia(100);Clostridiales(100);Peptostreptococcaceae(100);Peptostreptococcus(100);unclassified(100);unclassified(100);unclassified(100); |  |  |  |  |  |  |  |  |  |  |  |  |  |
| Otu0598 | 0                                            | 0  | 0 | 0 | 0  | 0  | 0  | 0 | 0 | 0 | 0  | 0 | 0 | 0 | 0                                                                                                                                                                                                                                                                                                                                                                                                                                                                                                                                                                                         | 0 | 0 | 0 | 0   | 0 | 0 | 0 | 0 | 0 | 0 | 0 | 0 |  |                                                                                                                                                                            |  |  |  |  |  |  |  |  |  |  |  |  |  |
|         | 0                                            | 0  | 0 | 0 | 0  | 0  | 0  | 0 | 0 | 0 | 0  | 0 | 0 | 0 | 0                                                                                                                                                                                                                                                                                                                                                                                                                                                                                                                                                                                         | 0 | 0 | 0 | 0   | 0 | 0 | 0 | 0 | 0 | 0 | 0 | 0 |  |                                                                                                                                                                            |  |  |  |  |  |  |  |  |  |  |  |  |  |
|         | 0                                            | 0  | 0 | 0 | 0  | 0  | 0  | 0 | 0 | 0 | 0  | 0 | 0 | 0 | 0                                                                                                                                                                                                                                                                                                                                                                                                                                                                                                                                                                                         | 0 | 0 | 0 | 0   | 0 | 0 | 0 | 0 | 0 | 0 | 0 | 0 |  |                                                                                                                                                                            |  |  |  |  |  |  |  |  |  |  |  |  |  |
|         | 16                                           | 0  | 0 | 0 | 0  | 21 | 0  | 0 | 0 | 0 | 0  | 0 | 0 | 0 | 0                                                                                                                                                                                                                                                                                                                                                                                                                                                                                                                                                                                         | 0 | 0 | 0 | 0   | 0 | 0 | 0 | 0 | 0 | 0 | 0 | 0 |  |                                                                                                                                                                            |  |  |  |  |  |  |  |  |  |  |  |  |  |
|         | M02255_77_000000000-ADUT3_1_2114_25434_15603 |    |   |   |    |    |    |   |   |   |    |   |   |   |                                                                                                                                                                                                                                                                                                                                                                                                                                                                                                                                                                                           |   |   |   |     |   |   |   |   |   |   |   |   |  |                                                                                                                                                                            |  |  |  |  |  |  |  |  |  |  |  |  |  |



|                                                                                                                                                                                                                                                                                                                                                                                                                                                                                                                                                                                                                                                                                                                                                                                                                                                            |   |   |   |   |    |    |    |   |    |    |    |   |   |   |   |   |    |   |   |   |    |   |    |   |    |   |   |   |
|------------------------------------------------------------------------------------------------------------------------------------------------------------------------------------------------------------------------------------------------------------------------------------------------------------------------------------------------------------------------------------------------------------------------------------------------------------------------------------------------------------------------------------------------------------------------------------------------------------------------------------------------------------------------------------------------------------------------------------------------------------------------------------------------------------------------------------------------------------|---|---|---|---|----|----|----|---|----|----|----|---|---|---|---|---|----|---|---|---|----|---|----|---|----|---|---|---|
| Otu0600                                                                                                                                                                                                                                                                                                                                                                                                                                                                                                                                                                                                                                                                                                                                                                                                                                                    | 0 | 0 | 0 | 0 | 0  | 0  | 0  | 0 | 0  | 0  | 0  | 0 | 0 | 0 | 0 | 0 | 0  | 0 | 0 | 0 | 0  | 0 | 13 | 0 | 0  | 0 | 0 | 0 |
| 33                                                                                                                                                                                                                                                                                                                                                                                                                                                                                                                                                                                                                                                                                                                                                                                                                                                         | 0 | 0 | 0 | 0 | 0  | 0  | 0  | 0 | 0  | 0  | 0  | 0 | 0 | 0 | 0 | 0 | 0  | 0 | 0 | 0 | 0  | 0 | 0  | 0 | 0  | 0 | 0 |   |
| 0                                                                                                                                                                                                                                                                                                                                                                                                                                                                                                                                                                                                                                                                                                                                                                                                                                                          | 0 | 0 | 0 | 0 | 0  | 0  | 0  | 0 | 0  | 0  | 0  | 0 | 0 | 0 | 0 | 0 | 0  | 0 | 0 | 0 | 36 | 0 | 0  | 0 | 0  | 0 | 0 |   |
| 0                                                                                                                                                                                                                                                                                                                                                                                                                                                                                                                                                                                                                                                                                                                                                                                                                                                          | 0 | 0 | 0 | 0 | 0  | 0  | 0  | 0 | 0  | 0  | 0  | 0 | 0 | 0 | 0 | 0 | 0  | 0 | 0 | 0 | 0  | 0 | 0  | 0 | 0  |   |   |   |
| M02255_77_000000000-ADUT3_1_1103_7219_8491 T---AC---GG-AG-GAT-----GCA-A-G-----C--G--T---T--AT-C-CGG-AA-----TT-A--T-T--GG-GC-----GT--A----AA-GC-GT-CC-----G-CA-G-G-T-G-----G--C-AA-T-T-C-----AA-<br>---G-T-C-T-----G-C-T--G--TT--A-AA-GG--T-T-CT-G-G-----CT-C-AA-----C-C-A-G-A-G-A--C-A---G-G--C-A--G--T-----G--GA-A-A--C-----T--G-A--AT--A-G-C---T-A-G-A-G-T--G---C-GG-----TA-G-G-----G-G-C-A--GA-G-----GG--A--ATT---C-C-C-A-<br>GT--GT-A-G-CG-GT--G---A--A---TG-C-GT-AG--AG-A-TT--G-G--G-A-A-G-A-AC-A-CC---GG--T--G--GC-GAA-A--G-C--G-----C--T-C-T-G---CTA--G--GC-C-G-----T-A---A-C-T--GA--CA-C-T-C--A-TG--G-A-CG-A--AA-G-C---T-AG--GG-G--AG-<br>C-G-AA-----TG--GG Bacteria(100);Cyanobacteria(100);unclassified(100);unclassified(100);unclassified(100);unclassified(100);unclassified(100);unclassified(100);unclassified(100);                        |   |   |   |   |    |    |    |   |    |    |    |   |   |   |   |   |    |   |   |   |    |   |    |   |    |   |   |   |
| Otu0601                                                                                                                                                                                                                                                                                                                                                                                                                                                                                                                                                                                                                                                                                                                                                                                                                                                    | 0 | 0 | 0 | 0 | 0  | 0  | 0  | 0 | 22 | 0  | 0  | 0 | 0 | 0 | 0 | 0 | 0  | 0 | 0 | 0 | 7  | 0 | 0  | 0 | 0  | 0 | 0 | 0 |
| 0                                                                                                                                                                                                                                                                                                                                                                                                                                                                                                                                                                                                                                                                                                                                                                                                                                                          | 0 | 0 | 0 | 0 | 26 | 0  | 60 | 0 | 18 | 10 | 0  | 0 | 0 | 0 | 0 | 0 | 0  | 0 | 0 | 0 | 0  | 0 | 0  | 0 | 0  | 0 | 0 |   |
| 0                                                                                                                                                                                                                                                                                                                                                                                                                                                                                                                                                                                                                                                                                                                                                                                                                                                          | 0 | 0 | 0 | 0 | 0  | 0  | 0  | 0 | 0  | 0  | 0  | 0 | 0 | 0 | 0 | 0 | 65 | 0 | 0 | 0 | 0  | 0 | 0  | 0 | 0  | 0 | 0 |   |
| 0                                                                                                                                                                                                                                                                                                                                                                                                                                                                                                                                                                                                                                                                                                                                                                                                                                                          | 0 | 0 | 0 | 0 | 0  | 0  | 0  | 0 | 0  | 0  | 0  | 0 | 0 | 0 | 0 | 0 | 0  | 0 | 0 | 0 | 0  | 0 | 0  | 0 | 0  | 0 | 0 |   |
| M02255_77_000000000-ADUT3_1_1105_25942_10977 C---AC---GT-AG-GCA-----CCA-A-G-----C--G--T---T--GT-C-CGG-AT-----TT-A--T-T--GG-GC-----GT--A----AA-GA-GC-TC-----G-TA-G-G-C-G-----G--T-TC-A-G-T-----<br>----AA---G-T-C-G-----G-G-T--G--TG--A-AA-AC--T-C-TG-G-G-----CT-C-AA-----C-C-C-A-G-A-G--A-----C-G-CC-A--C-C-----C-GA-T-A--C-----T--G-C--TG-TG-A-C---T-T-G-A-G-T--A--C-GG-----TA-G-G-----G-G-A-G---TG-G-----GG--A--ATT---<br>C-C-T-G-GT--GT-A-G-CG-GT--G---A--A---TG-C-GC-AG--AT-A-TC--A-G--G-A-G-G-A-AC-A-CC---AG--T--G--GC-GAA-G--G-C--G-----C--C-A-C-T---CTG--G--GC-C-G-----T-A---A-C-T--GA--CG-C-T-G--A-GG--A-G-CG-A--AA-G-C---G-TG--<br>GG-T--AG-C-A-AA-----CA--GG Bacteria(100);Actinobacteria(100);Actinobacteria(100);Acidimicrobiae(100);Acidimicrobiales(100);Acidimicrobinaeae(100);Acidimicrobiaceae(100);unclassified(100);unclassified(100);  |   |   |   |   |    |    |    |   |    |    |    |   |   |   |   |   |    |   |   |   |    |   |    |   |    |   |   |   |
| Otu0602                                                                                                                                                                                                                                                                                                                                                                                                                                                                                                                                                                                                                                                                                                                                                                                                                                                    | 0 | 0 | 0 | 0 | 0  | 0  | 0  | 0 | 0  | 0  | 0  | 0 | 0 | 0 | 0 | 0 | 0  | 0 | 0 | 0 | 0  | 0 | 0  | 0 | 4  | 3 | 0 | 9 |
| 0                                                                                                                                                                                                                                                                                                                                                                                                                                                                                                                                                                                                                                                                                                                                                                                                                                                          | 0 | 0 | 0 | 0 | 0  | 0  | 0  | 0 | 0  | 0  | 0  | 0 | 0 | 0 | 0 | 0 | 0  | 0 | 0 | 0 | 0  | 0 | 0  | 0 | 0  | 0 | 0 |   |
| 0                                                                                                                                                                                                                                                                                                                                                                                                                                                                                                                                                                                                                                                                                                                                                                                                                                                          | 0 | 0 | 0 | 0 | 0  | 0  | 0  | 0 | 0  | 0  | 0  | 0 | 0 | 0 | 0 | 0 | 0  | 0 | 0 | 0 | 10 | 0 | 0  | 0 | 0  | 0 | 0 |   |
| 0                                                                                                                                                                                                                                                                                                                                                                                                                                                                                                                                                                                                                                                                                                                                                                                                                                                          | 0 | 0 | 0 | 0 | 0  | 0  | 0  | 0 | 0  | 0  | 0  | 0 | 0 | 0 | 0 | 0 | 0  | 0 | 0 | 0 | 0  | 0 | 0  | 0 | 0  |   |   |   |
| M02255_76_000000000-ADUNE_1_1106_15060_17325 T---AC---GG-AG-GGG-----GCT-A-G-----C--G--T---T--AT-T-CGG-AA-----TT-A--C-T--GG-GC-----GT--A----AA-GC-GC-AC-----G-TA-G-G-C-G-----G--G-TC-A-G-C-----<br>-----AA---G-T-T-G-----G-G-G--G--TG--A-AA-TC--C-C-GG-G-G-----CT-C-AA-----C-C-C-C-G-G-A--A-C---G-G--C-C---C--T-----C--AA-A-A--C-----T--G-T--TG--G-T-C---T-T-G-A-G-T--T--C-GA---GA-G-A-----G-G-T-G--AG-T-----GG--A--ATT---<br>C-C-G-A-GT--GT-A-G-AG-GT--G---A--A---TT-C-GT-AG--AT-A-TT--C-G--G-A-G-G-A-AC-A-CC---AG--T--G--GC-GAA-G--G-C--G-----G--C-T-C-A---CTG--G--CT-C-G-----A-T---A-C-T--GA--CG-C-T-G--A-GG--T-G-CG-A--AA-G-C---G-TG--GG-<br>G--AG-C-A-AA-----CA--GG Bacteria(100);Proteobacteria(100);Alphaproteobacteria(100);Rhodobacterales(100);Rhodobacteraceae(100);unclassified(100);unclassified(100);unclassified(100);unclassified(100);     |   |   |   |   |    |    |    |   |    |    |    |   |   |   |   |   |    |   |   |   |    |   |    |   |    |   |   |   |
| Otu0603                                                                                                                                                                                                                                                                                                                                                                                                                                                                                                                                                                                                                                                                                                                                                                                                                                                    | 0 | 0 | 0 | 0 | 0  | 0  | 0  | 0 | 0  | 0  | 0  | 0 | 0 | 0 | 0 | 0 | 0  | 0 | 0 | 0 | 0  | 0 | 0  | 0 | 0  | 0 | 0 | 0 |
| 0                                                                                                                                                                                                                                                                                                                                                                                                                                                                                                                                                                                                                                                                                                                                                                                                                                                          | 0 | 0 | 0 | 0 | 19 | 35 | 46 | 0 | 0  | 0  | 44 | 0 | 0 | 0 | 0 | 0 | 0  | 0 | 0 | 0 | 0  | 0 | 0  | 0 | 0  | 0 | 0 |   |
| 0                                                                                                                                                                                                                                                                                                                                                                                                                                                                                                                                                                                                                                                                                                                                                                                                                                                          | 0 | 0 | 0 | 0 | 0  | 0  | 0  | 0 | 0  | 0  | 0  | 0 | 0 | 0 | 0 | 0 | 0  | 0 | 0 | 0 | 0  | 0 | 0  | 0 | 0  | 0 | 0 |   |
| 19                                                                                                                                                                                                                                                                                                                                                                                                                                                                                                                                                                                                                                                                                                                                                                                                                                                         | 0 | 0 | 0 | 0 | 0  | 0  | 0  | 0 | 0  | 0  | 0  | 0 | 0 | 0 | 0 | 0 | 0  | 0 | 0 | 0 | 0  | 0 | 0  | 0 | 0  | 0 | 0 |   |
| M02255_77_000000000-ADUT3_1_2101_12360_13769 T---AC---GT-AG-GGT-----GCG-A-G-----C--G--T---T--GT-C-CGG-AA-----TT-A--T-T--GG-GC-----GT--A----AA-GG-GC-TC-----G-TA-G-G-C-G-----G--T-TA-G-T-C-----<br>-----GC---G-T-C-G-----G-G-A--G--TG--A-AA-AC--T-C-GG-A-G-----CT-T-AA-----C-T-C-C-G-A-G--C-T---T-G--C-T---T--C-----T--GA-T-A--C-----G--G-G--CT--G-A-C---T-A-G-A-G-G--T--A-TG---CA-G-G-----G-G-A-G---AA-T-----GG--A--ATT---<br>C-C-T-G-GT--GT-A-G-CG-GT--G---A--A---TG-C-GC-AG--AT-A-TC--A-G--G-A-G-G-A-AC-A-CC---GG--T--G--GC-GAA-G--G-C--G-----G--T-T-C-T---CTG--G--GC-A-T-----T-A---C-C-T--GA--CG-C-T-G--A-GG--A-G-CG-A--AA-G-T---G-TG--<br>GG-G--AG-C-G-AA-----CA--GG Bacteria(100);Actinobacteria(100);Actinobacteria(100);Actinobacteridae(100);Actinomycetales(100);Propionibacterineae(100);Nocardioidaceae(100);unclassified(89);unclassified(89); |   |   |   |   |    |    |    |   |    |    |    |   |   |   |   |   |    |   |   |   |    |   |    |   |    |   |   |   |
| Otu0604                                                                                                                                                                                                                                                                                                                                                                                                                                                                                                                                                                                                                                                                                                                                                                                                                                                    | 0 | 0 | 3 | 1 | 8  | 1  | 0  | 0 | 3  | 0  | 0  | 0 | 0 | 0 | 0 | 0 | 0  | 0 | 0 | 1 | 0  | 0 | 0  | 0 | 0  | 0 | 0 | 0 |
| 12                                                                                                                                                                                                                                                                                                                                                                                                                                                                                                                                                                                                                                                                                                                                                                                                                                                         | 8 | 0 | 0 | 1 | 0  | 0  | 0  | 0 | 0  | 0  | 0  | 0 | 0 | 0 | 0 | 0 | 7  | 0 | 0 | 0 | 4  | 0 | 0  | 0 | 0  | 0 | 8 |   |
| 0                                                                                                                                                                                                                                                                                                                                                                                                                                                                                                                                                                                                                                                                                                                                                                                                                                                          | 0 | 0 | 0 | 0 | 0  | 0  | 0  | 0 | 0  | 0  | 0  | 0 | 0 | 2 | 0 | 0 | 0  | 6 | 2 | 0 | 0  | 0 | 1  | 0 | 9  | 0 | 0 |   |
| 0                                                                                                                                                                                                                                                                                                                                                                                                                                                                                                                                                                                                                                                                                                                                                                                                                                                          | 0 | 0 | 0 | 0 | 0  | 0  | 0  | 0 | 0  | 0  | 0  | 0 | 0 | 0 | 0 | 0 | 0  | 1 | 0 | 5 | 1  | 0 | 0  | 0 | 12 | 0 |   |   |
| M02255_76_000000000-ADUNE_1_2101_23595_12818 T---AA---GC-AC-CGG-----CTA-A-C-----T--A--C---G--TG-C-CAG-CA-----GC-C--G-C--GG-TA-----AT--A----CG-TA-GG-GT-----G-CA-A-G-C-GT-----T--A-AT-C-G-G-----<br>-----AA---G-A-C-A-----G-A-T--G--TG--A-AA-TC--C-C-CG-G-G-----CT-C-AA-----C-C-T-G-G-G-A--A-C---T-G--C-A--T--T-----T--GT-G-A--C-----T--G-C--AT--G-G-C---T-A-G-A-G-T--G---C-GG---CA-G-A-----G-G-G-G---GA-T-----GG--A--ATT---<br>C-C-G-C-GT--GT-A-G-CA-GT--G---A--A---TG-C-GT-AG--AT-A-TG--C-G--G-A-G-G-A-AC-A-CC---GA--T--G--GC-GAA-G--G-C--A-----A--T-C-C-C---CTG--G--GC-C-T-----G-C---A-C-T--GA--CG-C-T-C--A-TG--C-A-CG-A--AA-G-C---G-TG--GG-<br>G--AG-C-A-AA-----CA--GG Bacteria(100);Proteobacteria(100);Betaproteobacteria(100);Burkholderiales(100);Comamonadaceae(100);unclassified(100);unclassified(100);unclassified(100);unclassified(100);      |   |   |   |   |    |    |    |   |    |    |    |   |   |   |   |   |    |   |   |   |    |   |    |   |    |   |   |   |



|                                                                                                                                                                                                                              |    |   |   |   |   |    |   |    |    |   |     |   |   |   |    |   |   |   |   |   |   |   |    |   |   |   |   |
|------------------------------------------------------------------------------------------------------------------------------------------------------------------------------------------------------------------------------|----|---|---|---|---|----|---|----|----|---|-----|---|---|---|----|---|---|---|---|---|---|---|----|---|---|---|---|
| Otu0605                                                                                                                                                                                                                      | 0  | 0 | 0 | 0 | 0 | 0  | 0 | 0  | 0  | 0 | 0   | 0 | 0 | 0 | 0  | 0 | 0 | 0 | 0 | 0 | 0 | 0 | 0  | 0 | 0 | 0 | 0 |
|                                                                                                                                                                                                                              | 0  | 0 | 0 | 0 | 0 | 0  | 0 | 22 | 0  | 0 | 0   | 0 | 0 | 0 | 0  | 0 | 0 | 0 | 0 | 0 | 0 | 0 | 0  | 0 | 0 | 0 | 0 |
|                                                                                                                                                                                                                              | 0  | 0 | 0 | 0 | 0 | 0  | 0 | 0  | 0  | 0 | 0   | 0 | 0 | 0 | 0  | 0 | 0 | 0 | 0 | 0 | 0 | 0 | 0  | 0 | 0 | 0 | 0 |
|                                                                                                                                                                                                                              | 14 | 0 | 0 | 0 | 0 | 0  | 0 | 0  | 0  | 0 | 0   | 0 | 0 | 0 | 0  | 0 | 0 | 0 | 0 | 0 | 0 | 0 | 0  | 0 | 0 | 0 | 0 |
| M02255_77_000000000-ADUT3_1_1111_23892_16904 T---AC---GT-AG-GGA-----GCG-A-G-----C-G-T---T-GT-C-CGG-AT-----TT-A-C-T--GG-GT-----GT-A----AA-GG-GT-GC-----G-TA-G-G-C-G-----G--A-TT-G-G-C----                                     |    |   |   |   |   |    |   |    |    |   |     |   |   |   |    |   |   |   |   |   |   |   |    |   |   |   |   |
| -----AA---G-T-C-A-----G-A-A--G-TG--A-AA-TC--C-A-TG-G-G----CT-T-AA-----C-C-C-A-T-G-A--A-C---T-G-C-T---T-T-----T--GA-A-A--C-----T--G-T--TA--G-T-C---T-T-G-A-G-T--G---A-AG-----TA-G-A-----G-G-T-A--GG-C-----GG--A--ATT---C-     |    |   |   |   |   |    |   |    |    |   |     |   |   |   |    |   |   |   |   |   |   |   |    |   |   |   |   |
| C-C-G-GT--GT-A-G-CG-GT--G---A--A-A---TG-C-GT-AG--AG-A-TC--G-G--G-A-G-G-A-AC-A-CC---AG--T--G--GC-GAA-G--G-C--G-----G--C-C-T-A--CTG--G--GC-T-T-----T-A---A-C-T--GA--CG-C-T-G--A-GG--C-A-CG-A--AA-G-T---G-TG--GG-               |    |   |   |   |   |    |   |    |    |   |     |   |   |   |    |   |   |   |   |   |   |   |    |   |   |   |   |
| T--AG-C-A-AA-----CA--GG Bacteria(100);Firmicutes(62);Clostridia(62);Clostridiales(62);unclassified(62);unclassified(62);unclassified(62);unclassified(62);unclassified(62);                                                  |    |   |   |   |   |    |   |    |    |   |     |   |   |   |    |   |   |   |   |   |   |   |    |   |   |   |   |
| Otu0606                                                                                                                                                                                                                      | 0  | 0 | 0 | 0 | 1 | 0  | 0 | 0  | 0  | 0 | 0   | 0 | 0 | 0 | 0  | 0 | 0 | 0 | 0 | 0 | 0 | 0 | 0  | 0 | 1 | 0 | 0 |
|                                                                                                                                                                                                                              | 0  | 0 | 0 | 0 | 0 | 0  | 0 | 0  | 0  | 0 | 0   | 0 | 0 | 0 | 0  | 1 | 0 | 0 | 0 | 0 | 0 | 0 | 0  | 0 | 0 | 0 | 0 |
|                                                                                                                                                                                                                              | 0  | 0 | 0 | 0 | 0 | 0  | 0 | 0  | 0  | 0 | 0   | 0 | 0 | 0 | 0  | 0 | 0 | 0 | 0 | 0 | 0 | 0 | 0  | 0 | 0 | 0 | 0 |
|                                                                                                                                                                                                                              | 2  | 0 | 0 | 0 | 0 | 0  | 0 | 3  | 0  | 0 | 0   | 1 | 2 | 0 | 0  | 0 | 0 | 0 | 0 | 0 | 4 | 1 | 4  | 0 | 0 | 0 | 0 |
| M02255_77_000000000-ADUT3_1_2103_29305_10373 C---TG---TG-CC-AGC-----AGC-C-G-----C--G--G---T-AA-TACAG-AG-----GG-T--G-C--AA-GC-----GT--T-----AATCGGAATTA-----C-TG-G-G-T-G-----G--C-TT-G-A-T--                                  |    |   |   |   |   |    |   |    |    |   |     |   |   |   |    |   |   |   |   |   |   |   |    |   |   |   |   |
| -----AA---G-T-C-A-----G-A-T--G--TG--A-AA-TC--C-C-CG-G-G----CT-T-AA-----C-C-T-G-G-G-A--A-C---T-G--C-A---T-C-----T--GA-T-A--C-----T--G-T--TA--G-G-C---T-A-G-A-A-T--A--G-GT---GA-G-A-----G-G-A-A--GG-T-----AG--A--ATT---        |    |   |   |   |   |    |   |    |    |   |     |   |   |   |    |   |   |   |   |   |   |   |    |   |   |   |   |
| C-C-A-G-GT--GT-A-G-CG-GT--G---A--A-A---TG-C-GT-AG--AG-A-TC--T-G--G-A-G-G-A-AT-A-CC---GA--T--G--GC-GAA-G--G-C--A-----G--C-C-T-T---CTG--G--CA-T-C-----A-T---A-T-T--GA--CA-C-T-G--A-GG--T-T-CG-A--AA-G-C---G-TG--GG-            |    |   |   |   |   |    |   |    |    |   |     |   |   |   |    |   |   |   |   |   |   |   |    |   |   |   |   |
| T--AG-C-A-AA-----CA--GG Bacteria(100);Proteobacteria(100);Gammaproteobacteria(100);Pseudomonadales(100);Moraxellaceae(100);Psychrobacter(100);unclassified(100);unclassified(100);unclassified(100);                         |    |   |   |   |   |    |   |    |    |   |     |   |   |   |    |   |   |   |   |   |   |   |    |   |   |   |   |
| Otu0607                                                                                                                                                                                                                      | 0  | 0 | 0 | 0 | 0 | 0  | 0 | 0  | 0  | 0 | 0   | 0 | 0 | 0 | 0  | 0 | 0 | 0 | 0 | 0 | 0 | 0 | 0  | 0 | 0 | 0 | 0 |
|                                                                                                                                                                                                                              | 0  | 0 | 0 | 0 | 0 | 0  | 1 | 0  | 0  | 0 | 0   | 0 | 0 | 0 | 0  | 0 | 0 | 0 | 0 | 0 | 0 | 0 | 66 | 0 | 0 | 0 | 0 |
|                                                                                                                                                                                                                              | 0  | 0 | 0 | 0 | 0 | 0  | 0 | 0  | 0  | 0 | 0   | 0 | 0 | 0 | 0  | 0 | 0 | 0 | 0 | 0 | 0 | 0 | 0  | 0 | 0 | 0 | 0 |
|                                                                                                                                                                                                                              | 0  | 0 | 0 | 0 | 0 | 0  | 0 | 0  | 0  | 0 | 0   | 0 | 0 | 0 | 12 | 0 | 0 | 0 | 0 | 0 | 0 | 0 | 0  | 0 | 0 | 0 | 0 |
| M02255_77_000000000-ADUT3_1_1116_7460_13336 T---AC---GT-AG-GAC-----CCA-A-G-----C-G-T---T--AT-C-CGG-AG-----TG-A--C-T--GG-GC-----GT--A----AA-GA-GTTGC-----G-TA-G-G-C-G-----G--C-TC-G-T-T-----                                  |    |   |   |   |   |    |   |    |    |   |     |   |   |   |    |   |   |   |   |   |   |   |    |   |   |   |   |
| AA---G-C-G-A-----G-T-A--G--TG--A-AA-TC--G-T-GT-G-G----CT-C-AA-----C-C-A-T-AC--G--G-C---T-A--T-T---A--C-----T--CG-A-A--C-----T--G-G--CG--A-G-C---T-C-G-A-G-A--A---T-GG---TA-G-A-----G-G-T-A--GC-T-----GG--A--ATT---T-C-T-     |    |   |   |   |   |    |   |    |    |   |     |   |   |   |    |   |   |   |   |   |   |   |    |   |   |   |   |
| A-GT--GT-A-G-GA-GT--G---A--A-A---TC-C-GT-AG--AT-A-TT--A-G--A-A-G-G-A-AC-A-CC---AA--T--G--GC-GTA-G--G-C--A-----G--G-C-T-A---CTG--G--AC-C-A-----T-T---T-C-T--GA--CG-C-T-A--A-GG--C-A-CG-A--AA-G-C---G-TG--GG-G--AG-            |    |   |   |   |   |    |   |    |    |   |     |   |   |   |    |   |   |   |   |   |   |   |    |   |   |   |   |
| C-G-AA-----CC--GG Bacteria(100);Candidate_division_TM7(100);unclassified(100);unclassified(100);unclassified(100);unclassified(100);unclassified(100);unclassified(100);unclassified(100);                                   |    |   |   |   |   |    |   |    |    |   |     |   |   |   |    |   |   |   |   |   |   |   |    |   |   |   |   |
| Otu0608                                                                                                                                                                                                                      | 0  | 0 | 0 | 0 | 0 | 0  | 0 | 0  | 0  | 0 | 0   | 0 | 0 | 0 | 0  | 0 | 0 | 0 | 0 | 0 | 0 | 0 | 13 | 0 | 0 | 0 | 0 |
|                                                                                                                                                                                                                              | 0  | 0 | 0 | 0 | 0 | 0  | 0 | 0  | 0  | 0 | 141 | 0 | 0 | 0 | 0  | 0 | 0 | 0 | 0 | 0 | 0 | 0 | 0  | 0 | 0 | 0 | 0 |
|                                                                                                                                                                                                                              | 0  | 0 | 0 | 0 | 0 | 0  | 0 | 0  | 0  | 0 | 0   | 0 | 0 | 0 | 15 | 0 | 0 | 0 | 0 | 0 | 0 | 0 | 0  | 0 | 0 | 0 | 0 |
|                                                                                                                                                                                                                              | 0  | 0 | 0 | 0 | 0 | 4  | 0 | 0  | 0  | 0 | 14  | 0 | 0 | 0 | 0  | 0 | 0 | 0 | 0 | 0 | 0 | 0 | 0  | 0 | 0 | 0 | 0 |
| M02255_77_000000000-ADUT3_1_1110_27725_18600 T---AC---GT-AG-GTG-----GCA-A-G-----C--G--T---T-GT-C-CGG-AA-----TT-A--C-T--GG-GT-----GT--A----AA-GG-GA-GC-----G-TA-G-G-C-G-----G--G-AT-G-C-C----                                 |    |   |   |   |   |    |   |    |    |   |     |   |   |   |    |   |   |   |   |   |   |   |    |   |   |   |   |
| -----AA---G-T-C-A-----G-C-T--G--TG--A-AA-AC--T-A-TG-G-G----CT-T-AA-----C-C-C-G-T-A-G--A-C---T-G--C-A---G--T-----T--GA-A-A--C-----T--G-G--TA--T-T-C---T-T-G-A-G-T--G---A-AG-----TA-G-A-----G-G-T-T---GG-C-----GG--A--ATT---C- |    |   |   |   |   |    |   |    |    |   |     |   |   |   |    |   |   |   |   |   |   |   |    |   |   |   |   |
| C-G-A-GT--GT-A-G-CG-GT--G---A--A-A---TT-C-GT-AG--AT-A-TT--C-G--G-A-G-G-A-AC-A-CC---GG--T--G--GC-GAA-G--G-C--G-----G--C-C-A-A---CTG--G--GC-T-T-----T-A---A-C-T--GA--CG-C-T-G--A-GG--C-T-CG-A--AA-G-T---G-TG--GG-              |    |   |   |   |   |    |   |    |    |   |     |   |   |   |    |   |   |   |   |   |   |   |    |   |   |   |   |
| G--AG-C-A-AA-----CA--GG Bacteria(100);Firmicutes(100);unclassified(91);unclassified(91);unclassified(91);unclassified(91);unclassified(91);unclassified(91);unclassified(91);                                                |    |   |   |   |   |    |   |    |    |   |     |   |   |   |    |   |   |   |   |   |   |   |    |   |   |   |   |
| Otu0609                                                                                                                                                                                                                      | 0  | 0 | 0 | 0 | 0 | 0  | 0 | 0  | 0  | 0 | 0   | 0 | 0 | 0 | 0  | 0 | 0 | 0 | 0 | 0 | 0 | 0 | 0  | 0 | 0 | 0 | 0 |
|                                                                                                                                                                                                                              | 0  | 0 | 0 | 0 | 0 | 0  | 0 | 0  | 0  | 0 | 0   | 0 | 0 | 0 | 19 | 0 | 0 | 0 | 0 | 0 | 0 | 0 | 0  | 0 | 0 | 0 | 0 |
|                                                                                                                                                                                                                              | 0  | 0 | 0 | 0 | 0 | 0  | 0 | 0  | 0  | 0 | 0   | 0 | 0 | 0 | 0  | 0 | 0 | 0 | 0 | 0 | 0 | 0 | 0  | 0 | 0 | 0 | 0 |
|                                                                                                                                                                                                                              | 15 | 0 | 0 | 0 | 0 | 15 | 0 | 0  | 25 | 0 | 0   | 0 | 0 | 0 | 0  | 0 | 0 | 0 | 0 | 0 | 0 | 0 | 0  | 0 | 0 | 0 | 0 |
| M02255_77_000000000-ADUT3_1_1115_22438_8104 T----AC---GG-AG-GGT-----GCT-A-G-----C--G--T---T-GT-T-CGG-AA-----TT-A--C-T--GG-GC-----GT--A----AA-GG-GC-GC-----G-TA-G-G-C-G-----G--C-CG-T-T-T-----GC-                             |    |   |   |   |   |    |   |    |    |   |     |   |   |   |    |   |   |   |   |   |   |   |    |   |   |   |   |
| ---G-T-C-G-----G-A-T--G--TG--A-AA-GC--C-C-GG-G-G----CT-C-AA-----C-C-T-C-G-G-A--A-C---G-G--C-A---T--C-----C--GA-T-A--C-----G--G-G--GC--G-G-C---T-G-G-A-G-A--C---C-GG---GA-G-A-----G-G-A-G---GG-T-----GG--A--ATA---G-C-C-      |    |   |   |   |   |    |   |    |    |   |     |   |   |   |    |   |   |   |   |   |   |   |    |   |   |   |   |
| A-GT--GT-A-G-AG-GT--G---A--A-A---TT-C-GT-AG--AT-A-TT--G-G--C-T-G-G-A-AC-A-CC---GG--T--G--GC-GAA-A--G-C--G-----G--C-T-C-T---CTG--G--CC-C-G-----G-A---T-C-T--GA--CG-C-T-G--A-GG--C-G-CG-A--AA-G-C---G-T-G-GG-G--               |    |   |   |   |   |    |   |    |    |   |     |   |   |   |    |   |   |   |   |   |   |   |    |   |   |   |   |
| AG-C-A-AA-----CA--GG Bacteria(100);Proteobacteria(100);Alphaproteobacteria(100);unclassified(100);unclassified(100);unclassified(100);unclassified(100);unclassified(100);unclassified(100);                                 |    |   |   |   |   |    |   |    |    |   |     |   |   |   |    |   |   |   |   |   |   |   |    |   |   |   |   |



Otu0610 0 0 0 0 0 0 0 0 0 0 0 0 0 0 0 0 0 0 0 0 2 14 0 0 0 0 0 0 1  
0 1 0 0 0 0 0 0 0 0 26 0 0 0 0 0 0 0 0 0 0 0 0 0 0 0 0 0 0  
0 0 0 0 0 0 0 0 0 0 0 0 0 0 0 0 0 0 0 0 0 0 0 0 0 0 0 0 0  
0 0 0 0 0 0 0 0 0 0 0 0 0 0 0 11 0 0 0 0 0 0 0 0 0 0 0 0  
M02255\_76\_000000000-ADUNE\_1\_1109\_16403\_8442 .....AC---T-AC-GTG-----CC-A-G---C-A-G---C-CG-C-GGT-AA-----TA-C-G-T--AG-GT-----GA-C---AA-GC-G--TT-----G-TC-C-G---G-----A-T-CT-T-T-T-----AA---G-  
T-C-T-----G-A-T--G--TG--A-AA-GC--C-C-AC-G-G-----CT-C-AA-----C-C-G-T-G-G-A-T-----G-GT-C-A---T-T-----G--GA-A-A---C-----T--G-G--AA-G-A-C---T-T-G-A-A-T--G--C-AG-----AA-G-A-----G-G-A-A---AG-T-----GG--A--ATT---C-C-A-T-GT--  
GT-A-G-CG-GT--G---A--A-A---TG-C-GT-AG--AT-A-TA--T-G--G-A-G-G-A-AC-A-CC---AG--T--G--GC-GAA-G--G-C-G-----A--C-T-T-T---CTG--G--TC-T-G-----T-A---A-T-T--GA--CG-C-T-G--A-GG--C-T-CG-A--AA-G-C---G-TG--GG-G--AG-C-G-  
AA-----CA--GG Bacteria(100);Firmicutes(100);Bacilli(100);Lactobacillales(100);Carnobacteriaceae(100);unclassified(79);unclassified(79);unclassified(79);unclassified(79);

Otu0611 0 0 0 0 0 0 0 0 0 0 0 0 0 0 0 0 0 0 0 0 1 0 0 0 0 0 0 0 0 28  
0 0 1 0 0 0 0 0 0 0 28 1 0 0 0 0 0 0 0 0 0 0 0 0 0 0 0 0 0  
0 0 0 0 0 0 0 0 0 0 0 0 0 0 0 0 0 0 0 0 0 0 0 0 0 0 0 0 0  
0 0 0 0 0 0 0 0 0 0 0 0 0 0 0 0 0 0 0 0 0 0 0 0 0 0 0 0  
M02255\_77\_000000000-ADUT3\_1\_1115\_10312\_10472 T---AC--GA-AG-GGG-----GCT-A-G---C-G--T---T--GC-T-CGG-AA-----TC-A--C-T--GG-GC-----GT--A---AA-GG-GC-GC-----G-TA-G-G-C-G-----G--C-CC-T-G-T---  
-----TG---G-T-C-G-----G-G-C--G--TG--A-AA-TC--C-C-CG-G-G-----CT-C-AA-----C-C-C-G-G-G-G-G-C---T-G--C-G---C-C-----C--GA-A-A---C-----G--G-C--GG--G-G-C---T-G-G-A-G-G--C---A-AG---GA-G-A-----G-G-C-T---CG-C-----GG--A--ATT--  
--C-C-C-A-GT--GT-A-G-AG-GT--G---A--A-A---TT-C-GT-AG--AT-A-TT--G-G--G-A-A-G-A-AC-A-CC---GG--T--G--GC-GAA-G--G-C-G-----G--C-G-A-G---CTG--G--CC-T-T-----G-A---A-C-T--GA--CG-C-T-G--A-GG--C-G-CG-A--CA-G-C---G-TG--  
GG-G--AG-C-A-AA-----CA--GG Bacteria(100);Proteobacteria(100);Alphaproteobacteria(100);Rhodospirillales(100);unclassified(100);unclassified(100);unclassified(100);unclassified(100);unclassified(100);

Otu0612 0 0 0 0 0 0 0 0 0 0 0 0 0 0 0 0 0 0 0 0 2 0 0 0 0 0 0 0 0  
0 1 0 0 0 0 0 0 0 0 4 1 0 0 0 0 0 0 0 0 0 0 0 0 0 0 0 0 0  
0 0 0 0 0 0 0 0 0 0 0 0 0 0 0 0 0 0 0 0 0 0 0 0 0 0 0 0 0  
0 24 0 0 0 0 0 0 0 0 0 0 0 0 0 0 0 0 0 0 4 0 0 0 0 0 0 0 29  
M02255\_77\_000000000-ADUT3\_1\_1103\_18593\_16365 T---AC--GT-AG-GAT-----CCG-A-G---C-G--T---T--AT-C-CGG-AG-----TG-A--C-T--GG-GC-----GT--A---AA-GA-GTTGC-----G-TA-G-G-T-G-----G--T-TT-A-A-T---  
-----AA---G-C-G-A-----A-T-A--G--TG--A-AA-TC--T-G-GT-G-G-----CT-C-AA-----C-C-A-T-TCA-G--A-C---T-A-T-T--A-T-----T--CG-A-A---C-----T--G-T--TA--A-A-C---T-C-G-A-G-A--G---C-AG-----AA-G-A-----G-G-T-A---GC-T-----GG--A--ATT---T-  
C-T-A-GT--GT-A-G-GA-GT--G---A--A-A---TC-C-GT-AG--AT-A-TT--A-G--A-A-G-G-A-AC-A-CC---GA--T--G--GC-GTA-G--G-C-A-----G--G-C-T-A---CTG--G--GC-T-G-----T-T---T-C-T--GA--CA-C-T-G--A-GG--C-A-CG-A--AA-G-C---G-TG--GG-G-  
-AG-C-G-AA-----CC--GG Bacteria(100);Candidate\_division\_TM7(100);unclassified(100);unclassified(100);unclassified(100);unclassified(100);unclassified(100);unclassified(100);unclassified(100);

Otu0613 0 309 108 0 0 0 225 4 117 0 0 0 0 0 0 1 0 0 0 0 0 0 0 0 0 0 0 0 0  
0 0 0 0 0 0 0 0 0 0 0 0 0 0 0 0 0 0 0 0 0 0 0 0 0 0 0 0  
0 0 0 0 0 0 0 0 0 0 0 0 0 0 0 0 0 0 0 0 0 0 0 0 0 0 0 0  
0 0 0 0 0 0 0 0 0 0 0 0 0 0 0 0 0 0 0 0 0 0 0 0 50 0 0  
M02255\_77\_000000000-ADUT3\_1\_1101\_19843\_7140 T---AC--GT-AG-GGA-----GCA-A-G---C-G--T---T--AT-C-CGG-AT-----TT-A--C-T--GG-GT-----GT--A---AA-GG-GC-GC-----G-CA-G-G-C-G-----G--G-CC-G-G-C-----  
AA---G-T-T-G-----G-G-A--G--TG--A-AA-TC--C-C-GG-G-G-----CT-T-AA-----C-C-C-C-G-G-A--A-C---T-G--C-T---T-T-----C--AA-A-A---C-----T--G-C--TG--G-T-C---T-T-G-A-G-T--G---A-TG---GA-G-A-----G-G-C-A---GG-C-----GG--A--ATT---C-C-G-  
T-GT--GT-A-G-CG-GT--G---A--A-A---TG-C-GT-AG--AT-A-TA--C-G--G-A-G-G-A-AC-A-CC---AG--T--G--GC-GAA-G--G-C-G-----G--C-C-T-G---CTG--G--AC-A-T-----T-A---A-C-T--GA--CG-C-T-G--A-GG--C-G-CG-A--AA-G-C---G-TG--GG-G--  
AG-C-A-AA-----CA--GG Bacteria(100);Firmicutes(100);Clostridia(100);Clostridiales(100);Ruminococcaceae(100);Incertae\_Sedis(100);unclassified(100);unclassified(100);unclassified(100);

Otu0614 0 0 0 0 0 0 0 0 0 0 0 0 0 0 0 0 0 0 0 0 3 0 0 0 0 0 0 0 18 0 35  
0 0 0 0 0 0 0 0 0 0 0 0 0 0 0 0 0 0 0 0 0 86 0 0 0 0 0 0 0 0  
0 272 0 0 0 0 0 0 0 0 0 0 0 0 0 0 0 0 0 0 0 0 0 0 0 0 0 0 0  
0 0 0 15 0 0 0 0 0 0 0 0 31 3 0 0 0 0 0 0 0 0 0 0 0 0 0 0 0  
M02255\_77\_000000000-ADUT3\_1\_1103\_17751\_9172 T---AC--GT-AT-GTC-----GCG-A-G---C-G--T---T--AT-C-CGG-AA-----TT-A--T-T--GG-GC-----AT--A---AA-GG-GC-AT-----C-TA-G-G-C-G-----G--C-CC-T-G-T-----AA--  
--G-T-C-T-----A-G-G--G--TG--A-AA-AC--C-T-GC-G-G-----CT-C-AA-----C-C-G-C-A-G-G--C-C---T-G--C-C---C-C-----G--GA-A-A---C-----T--A-C--AG--G-G-C---T-A-G-A-G-T--G---C-TG---GA-G-A-----G-G-T-G---GA-C-----GG--A--ACT---G-C-A-C-  
GA--GT-A-G-AG-GT--G---A--A-A---TT-C-GT-AG--AT-A-TG--T-G--C-A-G-G-A-AT-G-CC---GA--T--G--AT-GAA-G--A-T-A-----G--T-T-C-A---CTG--G--AC-G-G-----C-A---A-C-T--GA--CG-C-T-G--A-AG--T-G-CG-A--AA-G-C---T-AG--GG-G--AG-C-  
A-AA-----CA--GG Bacteria(100);Fusobacteria(100);Fusobacteria(100);Fusobacteriales(100);Leptotrichiaceae(100);Leptotrichia(100);unclassified(100);unclassified(100);unclassified(100);



Otu0615 0 0 0 0 96 0 0 0 0 0 0 0 0 0 0 0 0 0 0 0 0 0 0 0 0 0 0 0  
0 0 0 0 0 0 0 0 0 0 0 0 0 0 0 0 0 0 0 0 0 0 0 0 0 0 0 0  
0 0 0 0 0 0 0 0 0 0 0 0 0 0 0 0 0 0 0 0 0 0 0 0 15 0 0 0 0  
0 0 0 0 0 0 0 0 0 0 0 0 0 0 0 0 0 0 29 0 0 0 0 0 0 0 0  
M02255\_77\_000000000-ADUT3\_1\_1101\_2986\_10392 T---AC---GA-GT-GCC-----TCA-A-G-----C-G-T---T-AT-C-CGG-AA-----TC-A-T-T-GG-GC-----GT-A---AA-GG-TT-GT-----G-TA-G-G-T-G-----G-T-TA-T-A-T-----TA---  
-G-T-C-T-----T-T-T-G--TT--A-AA-TT--C-T-TC-G-G----CT-T-AA-----C-C-G-G-G-G-G-C-A---T-G-C-A---A-A-----G-GA-A-A---C-----G-G-T-AT--G-AC----T-A-G-A-G-G-A---T-GC----GA-G-G-----G-G-T-C---TG-C-----GG--A--ACT---C-A-T-A-GT-  
-GT-A-G-CG-GT--G---A-A-A---TG-C-GT-TG--AT-A-TT--A-T-G-G-G-G-A-AC-A-CC---AA-A-A--GC-GAA-G--G-C-A-----G-C-A-G-A---CTG-G--AG-C-A-----C-T---C-C-T--GA--CA-C-T-G--A-AA--C-A-AG-A--AA-G-C---G-TG--GG-T--CG-C-G-  
AA-----TG--GG Bacteria(100);unclassified(100);unclassified(100);unclassified(100);unclassified(100);unclassified(100);unclassified(100);unclassified(100);unclassified(100);

Otu0616 0 200 0 0 0 0 2 0 0 0 0 0 0 0 0 0 0 0 0 0 0 0 0 0 0 0 0 0  
0 0 0 0 0 0 0 0 0 0 0 0 0 0 0 0 0 0 0 0 0 0 0 0 0 4 0 0 0  
0 0 0 0 0 0 0 0 0 0 0 0 0 0 0 0 0 0 0 0 0 0 0 0 0 0 0 0  
0 0 0 0 0 0 0 0 0 0 0 0 0 0 0 0 0 0 0 0 0 0 0 0 0 0 0  
M02255\_77\_000000000-ADUT3\_1\_1105\_20390\_9750 T---AC---GT-AG-GGG-----GCA-A-G-----C-G-T---T-AT-C-CGG-AA-----TT-A-T-T-GG-GC-----GT-A---AA-GA-GT-AC-----G-TA-G-G-T-G-----G-T-TT-T-C-T-----AA---  
--G-C-A-C-----G-G-G-G--TT--T-AA-GG--C-A-AT-G-G----CT-T-AA-----C-C-A-T-T-G-T-T-----C-G-C-C---T-T-----G-TG-A-A---C-----T-G-G-AA-G-A-C---T-T-G-A-G-T-G---C-AG---GA-G-A-----G-G-A-A---AG-C-----GG--A--ATT---C-C-T-A-  
GT--GT-A-G-CG-GT--G---A-A-A---TG-C-GT-AG--AT-A-TT--A-G--G-A-G-G-A-AC-A-CC---AG--T-G--GC-GAA-G--G-C-G-----G-C-T-T-T---CTG-G--AC-T-G-----T-A---A-C-T-GA--CA-C-T-G--A-GG--T-A-CG-A--AA-G-C---G-TG--GG-G--AG-C-  
A-AA-----CA--GG Bacteria(100);Firmicutes(100);Clostridia(100);Clostridiales(100);Family\_XIII\_Incertae\_Sedis(100);unclassified(100);unclassified(100);unclassified(100);unclassified(100);

Otu0617 0 0 0 0 0 0 0 0 0 0 0 0 0 0 0 0 0 0 0 0 0 0 0 8 0 0 0 0 0  
0 0 0 0 0 0 0 0 0 0 0 0 0 0 0 0 0 0 0 0 0 0 0 0 0 0 0 0  
0 0 0 0 0 0 0 0 0 0 0 0 0 0 0 0 0 0 0 0 0 0 0 0 0 0 0 0  
0 0 0 0 0 16 0 0 0 0 0 0 0 0 0 0 0 0 0 0 0 0 0 0 0 0 0  
M02255\_77\_000000000-ADUT3\_1\_2108\_27630\_7402 T---AC---GT-AG-GGT-----GCA-A-G-----C-G-T---T-GT-C-CGG-AT-----TT-A-T-T-GG-GC-----GT-A---AA-GA-GC-TC-----G-TA-G-G-C-G-----G-T-TT-G-T-C-----GC--  
--G-T-C-G-----A-C-T-G--TG--A-AA-GC--C-C-GG-G-G----CT-C-AA-----C-T-C-C-G-G-G-T-C---T-G--C-A---G-T-----C-GA-T-A---C-----G-G-G--CA-G-A-C---T-A-G-A-G-T-T---C-GG---TA-G-G-----G-G-A-G---AC-T-----GG--A--ATT---C-C-T-G-  
GT--GT-A-G-CG-GT--G---A-A-A---TG-C-GC-AG--AT-A-TC--A-G--G-A-G-G-A-AC-A-CC---GG--T-G--GC-GAA-G--G-C-G-----G-G-T-C-T---CTG-G--GC-C-G-----A-T---A-C-T-GA--CG-C-T-G--A-GG--A-G-CG-A--AA-G-C---G-TG--GG-G--AG-  
C-A-AA-----CA--GG Bacteria(100);Actinobacteria(100);Actinobacteria(100);Actinobacteridae(100);Actinomycetales(100);unclassified(67);unclassified(67);unclassified(67);unclassified(67);

Otu0618 0 8 0 0 0 0 0 0 13 0 0 0 0 0 0 0 0 0 0 0 0 0 0 0 0 0 0 0  
0 0 0 0 0 0 0 0 0 0 0 0 0 0 0 0 0 0 0 0 0 0 0 0 0 0 0 0  
0 0 0 0 0 0 0 0 0 0 0 0 0 0 0 0 0 0 0 0 0 0 0 0 0 0 0 0  
0 0 0 0 0 0 3 0 0 0 0 13 0 0 0 0 0 0 0 0 0 0 0 0 0 0 0  
M02255\_77\_000000000-ADUT3\_1\_2115\_6016\_15235 G---TG---CC-AG-CAG-----CCG-C-G-----G-T---A--AT-A-CGG-AG-----GA-T-C-C-GA-GC-----GT-T---AT-CC-GG-AT-----T-TA-G-G-T-G-----G--G-TT-G-T-T-----AA--  
--G-T-C-A-----G-T-T-G--TG--A-AA-GT--T-T-GC-G-G----CT-C-AA-----C-C-G-T-A-A-A-A-T---T-G--C-A---G-T-----T-GA-A-A---C-----T-G-G--CA-G-T-C---T-T-G-A-G-T-A---C-AG---TA-G-A-----G-G-T-G---GG-C-----GG--A--ATT---C-G-T-G-  
GT--GT-A-G-CG-GT--G---A-A-A---TG-C-TT-AG--AT-A-TC--A-C--G-A-A-G-A-AC-T-CC---GA--T--T--GC-GAA-G--G-C-A-----G-C-T-C-A---CTA--G--AC-T-G-----T-T---A-C-T-GA--CA-C-T-G--A-TG--C-T-CG-A--AA-G-T---G-TG--GG-T--AT-C-A-  
AA-----CA--GG Bacteria(100);Bacteroidetes(100);Bacteroidia(100);Bacteroidales(100);Bacteroidaceae(100);Bacteroides(100);unclassified(100);unclassified(100);unclassified(100);

Otu0619 0 0 0 0 0 59 0 0 0 0 0 0 0 0 0 0 0 0 0 0 0 0 0 49 0 0 0 0 0  
0 0 0 0 0 0 0 0 0 0 0 0 0 0 0 0 0 0 0 0 0 0 0 0 0 0 0 0  
0 0 0 0 0 0 0 0 0 0 0 0 0 0 0 0 0 0 0 0 0 0 0 0 0 0 0 0  
0 0 0 0 0 0 0 0 0 0 0 0 0 0 0 0 0 0 0 0 0 0 0 0 0 0 0  
M02255\_77\_000000000-ADUT3\_1\_2119\_18293\_22835 T---AC---GA-AG-GGG-----GCT-A-G-----C-G-T---T-GC-T-CGG-AA-----TT-A-C-T-GG-GC-----GT-A---AA-GG-GA-GC-----G-TA-G-G-C-G-----G--G-TT-A-T-C---  
-----AA---G-T-T-G-----G-A-G--G--TG--A-AA-GC--C-C-AG-G-G----CT-C-AA-----C-C-T-T-G-G-A-A-T---T-G--C-C---T-T-----C-AA-A-A---C-----T-G-A-TA--G-C-C---T-A-G-A-G-T-A---T-GA---TA-G-A-----G-G-T-A---AG-T-----GG--A--ACT---  
C-C-G-A-GT--GT-A-G-AG-GT--G---A-A-A---TT-C-GT-AG--AT-A-TT--C-G--G-A-A-G-A-AC-A-CC---AG--T-G--GC-GAA-G--G-C-G-----A-C-T-T-A---CTG-G--AT-C-A-----T-G---A-C-T-GA--CG-C-T-G--A-GG--C-T-CG-A--AA-G-C---G-TG--GG-  
G--AG-C-A-AA-----CA--GG Bacteria(100);Proteobacteria(100);Alphaproteobacteria(100);Caulobacterales(100);Caulobacteraceae(100);unclassified(55);unclassified(55);unclassified(55);unclassified(55);



Otu0620 0 0 0 0 0 0 0 0 0 0 0 0 0 0 0 0 0 0 0 0 0 0 0 2 0 0 0 0  
0 0 0 0 0 0 0 0 0 0 0 0 0 0 0 0 0 0 0 0 0 0 0 0 0 0 0  
0 0 0 0 0 0 0 0 0 0 0 0 0 0 0 0 0 0 0 0 0 0 0 0 0 0 0 18  
0 0 0 0 0 0 0 0 0 0 0 0 0 0 0 0 0 0 0 0 0 0 0 0 0 0  
M02255\_77\_000000000-ADUT3\_1\_1117\_25241\_18621 G---AC--GA-AC-CGT-----GCG-A-A----C-G-T--T--AT-T-CGG-AA-----TT-A--C-T--GG-GC-----TT-A----AA-GC-GC-GT-----G-TA-G-G-C-G-----G--G-CC-G-G-C-----  
-----AC---G-T-C-C-----GAC-G--C--TG--A-AA-TC--C-C-CC-G-G----CT-C-AA-----C-C-G-G-G-G-A-A-G---T-G--G-C--G--G-----G--GA-T-A--C-----G--A-C--CG--G-C-C---T-C-G-A-G-G--G--G-GG----TA-G-G-----G-G-G-A--CC-T-----GG--A--ACT---  
-T-C-C-G-GT--GG-A-G-CG-GT--G---A--A-A---TG-C-GT-TG--AG-A-TC--G-G--A-A-G-G-A-AC-G-CC---CG--T--G--GC-GAA-A-G-C--G-----A--G-G-T-C---CTG--G--AC-C-C-----T-T---T-C-T--GA--CG-C-T-G--A-GA--C-G-CG-A--AA-G-C---C-AG--  
GG-G--AG-C-G-AA-----CG--GG Bacteria(100);Planctomycetes(100);Planctomycetacia(100);Planctomycetales(100);Planctomycetaceae(100);Singulisphaera(100);unclassified(100);unclassified(100);unclassified(100);

Otu0621 0 0 0 0 0 0 0 0 0 0 0 0 0 0 0 0 0 0 0 0 0 0 0 0 0 0 0 0  
0 0 0 0 0 0 0 0 0 0 0 0 0 0 0 0 0 0 0 0 0 0 0 0 0 0 0  
0 0 0 0 0 0 0 0 0 0 0 0 0 0 0 0 0 0 0 0 0 0 0 0 0 0 0  
0 0 0 0 0 0 0 0 0 0 0 0 0 0 0 46 0 0 0 0 0 0 0 0 0 0 0  
M02255\_76\_000000000-ADUNE\_1\_1119\_7158\_8330 .....AC---T-AC-GTG-----CC-A-G-----C-A-G---C--CG-C-GGT-AA-----TA-C--G-T--AG-GT-----GA--C-----AA-GC-G--TT-----G---T-C-C-G-----G--T-CT-T-T-T-----AA---G-  
T-C-T-----G-A-T--G--TG--A-AA-GC--C-C-AC-G-G----CT-C-AA-----C-C-G-T-G-G-A--T-----G-GT-C-A--T--T-----G--GA-A-A--C-----T--G-G--AG--G-A-C---T-T-G-A-A-T-A--C-AG-----AA-G-A-----G-G-T-A--AG-T-----GG--A--ATT---C-C-A-T-GT--  
GT-A-G-CG-GT--G---A--A-A---TG-C-GT-AG--AT-A-TA--T-G--G-A-G-G-A-AC-A-CC---AG--T--G--GC-GAA-G--G-C--G-----A--C-T-T-A---CTG--G--TC-T-G-----T-T---A-T-T--GA--CG-C-T-G--A-GG--C-T-CG-A--AA-G-C---G-TG--GG-G--AG-C-G-  
AA-----CA--GG Bacteria(100);Firmicutes(100);Bacilli(100);Lactobacillales(100);Carnobacteriaceae(100);unclassified(100);unclassified(100);unclassified(100);unclassified(100);

Otu0622 0 0 0 0 0 0 0 0 0 0 0 0 0 0 0 0 0 0 0 0 0 0 0 0 0 0 0  
0 0 0 0 0 0 0 0 0 0 0 0 0 0 0 0 0 0 0 0 0 0 0 0 0 0 0  
0 0 0 0 0 0 0 0 0 0 0 0 0 0 0 0 0 0 0 0 0 0 0 0 0 0 0  
0 0 0 0 0 0 6 0 0 0 0 0 0 0 0 0 0 0 0 0 0 0 174 0 0 0 0  
M02255\_77\_000000000-ADUT3\_1\_1102\_16413\_22482 T---AC--GA-AG-GGG-----GCT-A-G-----C-G-T--T--GC-T-CGG-AA-----TT-A--C-T--GG-GC-----GT--A-----AA-GG-GC-GC-----G-TA-G-G-C-G-----G--G-TC-G-T-T-----  
-----AA---G-T-T-A-----G-A-G--G--TG--A-AA-GC--C-C-AG-G-G----CT-C-AA-----C-C-C-T-G-G-A--A-T---T-G--C-C---T--T-----T--GA-T-A--C-----T--G-G--CG--A-C-C---T-T-G-A-G-T-A--T-GG-----CA-G-A-----G-G-T-G---TG-T-----GG--A--ACT---  
C-C-G-A-GT--GT-A-G-AG-GT--G---A--A-A---TT-C-GT-AG--AT-A-TT--C-G--G-A-A-G-A-AC-A-CC---AG--T--G--GC-GAA-G--G-C--G-----A--C-A-C-A---CTG--G--GC-C-A-----T-T---A-C-T--GA--CG-C-T-G--A-GG--C-G-CG-A--AA-G-C---G-TG--GG-  
G--AG-C-A-AA-----CA--GG Bacteria(100);Proteobacteria(100);Alphaproteobacteria(100);Caulobacterales(100);Caulobacteraceae(100);unclassified(100);unclassified(100);unclassified(100);unclassified(100);

Otu0623 0 0 0 0 0 0 0 0 0 0 0 0 0 0 0 0 0 0 0 0 0 0 0 0 13 0 0 0  
0 0 0 0 0 0 1 0 0 0 0 0 0 0 0 0 0 0 0 0 0 0 0 0 0 0 0  
0 0 0 0 0 0 0 0 0 0 0 0 0 0 0 0 0 0 0 0 0 0 0 0 0 0 0  
2 0 0 0 0 0 0 0 0 0 0 0 0 0 0 0 0 0 0 0 0 2 0 0 0 0 0  
M02255\_77\_000000000-ADUT3\_1\_2118\_23697\_6859 C---CG---TG-CC-AGC-----AGC-C-G-----C--G--G---T--AA-TACGG-AG-----GG-T--G-C--GA-GC-----GT--T-----AA-TCGGAATT-----ACTG-G-G-C-G-----G--T-CT-G-T-T-----  
AA---G-C-A-A-----G-A-T--G--TG--A-AA-GC--C-C-GG-G-G----CT-C-AA-----C-C-T-C-G-G-A--A-C---A-G--C-A--T--T-----T--TG-A-A--C-----T--G-G--CA--G-A-C---T-A-G-A-G-T--C---T-TG-----TA-G-A-----G-G-G-G---GG-T-----AG--A--ATT---T-C-A-  
G-GT--GT-A-G-CG-GT--G---A--A-A---TG-C-GT-AG--AG-A-TC--T-G--A-A-G-G-A-AT-A-CC---GG--T--G--GC-GAA-G--G-C--G-----G--C-C-C-C---CTG--G--AC-A-A-----A-G---A-C-T--GA--CG-C-T-C--A-GA--T-G-CG-A--AA-G-C---G-TG--GG-G--  
AG-C-A-AA-----CA--GG Bacteria(100);Proteobacteria(100);Gammaproteobacteria(100);Vibrionales(100);Vibrionaceae(100);Photobacterium(100);unclassified(100);unclassified(100);unclassified(100);

Otu0624 0 0 0 0 0 0 0 0 0 0 0 0 0 0 0 0 0 0 0 0 0 0 0 0 0 0 0  
0 0 0 0 0 0 0 0 0 0 0 0 0 0 0 0 0 0 0 0 0 0 0 0 0 0 0  
0 0 0 0 0 0 0 0 0 0 0 0 0 0 0 0 0 0 0 0 0 0 0 0 0 0 0  
0 0 0 0 0 0 0 0 0 0 0 0 0 0 0 0 0 0 0 0 0 0 0 0 0 10  
M02255\_76\_000000000-ADUNE\_1\_1106\_23524\_22293 .....AC---T-AC-GT-----GCC-A-G-----C-A--G---C--CG-C-GGT-AA-----TA-C--G-T--AG-GT-----GG--C-----AA--G-CG-TT-----G---T-C-C-G-----G--A-TT-C-T-T-----  
AA---G-T-C-T-----G-A-T--G--TG--A-AA-GC--C-C-AC-G-G----CT-T-AA-----C-C-G-T-G-G-A--A-G---T-G--C-A--T--T-----G--GA-A-A--C-----T--G-G--GG--A-A-C---T-T-G-A-G-T-A--C-AG-----AA-G-A-----G-G-A-A--AG-T-----GG--A--ACT---C-C-  
A-T-GT--GT-A-G-CG-GT--G---G--A-A---TG-C-GT-AG--AT-A-TA--T-G--G-A-A-G-A-AC-A-CC---AG--T--G--GC-GAA-G--G-C--G-----A--C-T-T-T---CTG--G--TC-T-G-----T-C---A-C-T--GA--CG-C-T-G--A-GG--C-C-CG-A--AA-G-C---G-TG--GG-T--  
AG-C-A-AA-----CA--GG Bacteria(100);Firmicutes(100);Bacilli(100);Lactobacillales(100);Aerococcaceae(100);Aerococcus(100);unclassified(100);unclassified(100);unclassified(100);



|                                                                                                                                                                                                                                                                                                                                                                                                                                                                                                                                                                                                                                                                                                                                                                                                       |   |    |   |    |   |    |    |   |   |    |   |   |   |   |   |    |   |   |   |     |    |   |   |   |   |   |    |
|-------------------------------------------------------------------------------------------------------------------------------------------------------------------------------------------------------------------------------------------------------------------------------------------------------------------------------------------------------------------------------------------------------------------------------------------------------------------------------------------------------------------------------------------------------------------------------------------------------------------------------------------------------------------------------------------------------------------------------------------------------------------------------------------------------|---|----|---|----|---|----|----|---|---|----|---|---|---|---|---|----|---|---|---|-----|----|---|---|---|---|---|----|
| Otu0625                                                                                                                                                                                                                                                                                                                                                                                                                                                                                                                                                                                                                                                                                                                                                                                               | 0 | 0  | 0 | 0  | 0 | 0  | 0  | 0 | 0 | 0  | 0 | 0 | 0 | 0 | 0 | 0  | 0 | 0 | 0 | 0   | 0  | 0 | 0 | 0 | 0 | 0 | 0  |
|                                                                                                                                                                                                                                                                                                                                                                                                                                                                                                                                                                                                                                                                                                                                                                                                       | 0 | 0  | 0 | 0  | 0 | 0  | 0  | 0 | 0 | 0  | 0 | 0 | 0 | 0 | 0 | 0  | 0 | 0 | 0 | 0   | 0  | 0 | 0 | 0 | 0 | 0 | 0  |
|                                                                                                                                                                                                                                                                                                                                                                                                                                                                                                                                                                                                                                                                                                                                                                                                       | 0 | 0  | 0 | 0  | 0 | 0  | 0  | 0 | 0 | 0  | 0 | 0 | 0 | 0 | 0 | 0  | 0 | 0 | 0 | 0   | 0  | 0 | 0 | 0 | 0 | 0 | 0  |
|                                                                                                                                                                                                                                                                                                                                                                                                                                                                                                                                                                                                                                                                                                                                                                                                       | 0 | 0  | 0 | 0  | 0 | 14 | 0  | 0 | 0 | 0  | 0 | 0 | 0 | 0 | 0 | 0  | 0 | 0 | 0 | 112 | 0  | 0 | 0 | 0 | 0 | 0 | 0  |
| M02255_77_000000000-ADUT3_1_1114_22034_7545 T---AC---GA-AG-GGG-----GCT-A-G-----C-G-T---T-GC-T-CGG-AA-----TG-A-C-T-GG-GC-----GT-A---AA-GG-GC-GC-----G-TA-G-G-C-G-----G-A-TT-G-G-T-----CA---G-T-C-G-----G-G-C--G-TG-A-AA-TT--C-C-TG-G-G----CT-C-AA-----C-C-T-G-G-G-G-A-C---T-G-C-G---T-T-----C-GA-G-A--C-----G-G-C-TG-G-T-C---T-A-G-A-G-T-G---G-GG---AA-G-A-----G-G-G-T--CG-T-----GG-A-ATT---C-C-C-A-GT--GT-A-G-AG-GT--G---A-A-A---TT-C-GT-AG--AT-A-TT--G-G--G-A-G-A-AC-A-CC--GG--T-G-GC-GAA-G-G-C-G-----G-C-G-A-C--CTG--G--TC-C-T-----T-G---A-C-T-GA-CG-C-T-G--A-GG--C-G-CG-A-AA-G-C--G-TG--GG-G--AG-C-A-AA-----CA--GG Bacteria(100);Proteobacteria(100);Alphaproteobacteria(100);Rhodospirillales(100);Acetobacteraceae(100);unclassified(100);unclassified(100);unclassified(100);unclassified(100); |   |    |   |    |   |    |    |   |   |    |   |   |   |   |   |    |   |   |   |     |    |   |   |   |   |   |    |
| Otu0626                                                                                                                                                                                                                                                                                                                                                                                                                                                                                                                                                                                                                                                                                                                                                                                               | 0 | 0  | 0 | 0  | 0 | 0  | 0  | 0 | 0 | 0  | 0 | 0 | 0 | 0 | 0 | 0  | 0 | 0 | 0 | 0   | 0  | 0 | 0 | 0 | 0 | 0 | 0  |
|                                                                                                                                                                                                                                                                                                                                                                                                                                                                                                                                                                                                                                                                                                                                                                                                       | 1 | 0  | 0 | 0  | 0 | 0  | 29 | 0 | 0 | 10 | 0 | 0 | 0 | 0 | 0 | 0  | 0 | 0 | 0 | 0   | 0  | 0 | 0 | 0 | 0 | 0 | 0  |
|                                                                                                                                                                                                                                                                                                                                                                                                                                                                                                                                                                                                                                                                                                                                                                                                       | 0 | 0  | 0 | 0  | 0 | 0  | 0  | 0 | 0 | 0  | 0 | 0 | 0 | 0 | 0 | 11 | 0 | 0 | 0 | 0   | 0  | 0 | 0 | 0 | 0 | 0 | 0  |
|                                                                                                                                                                                                                                                                                                                                                                                                                                                                                                                                                                                                                                                                                                                                                                                                       | 0 | 0  | 0 | 0  | 0 | 0  | 0  | 0 | 0 | 0  | 0 | 0 | 0 | 0 | 0 | 0  | 0 | 0 | 0 | 0   | 0  | 0 | 0 | 0 | 4 | 0 | 0  |
| M02255_77_000000000-ADUT3_1_1113_10399_7307 C---AC---GT-AG-GGG-----GCA-A-G-----C-G-T---T-GT-C-CGG-AT-----TT-A--T-T-GG-GC-----GT-A---AA-GA-GC-TC-----G-TA-G-G-T-G-----G--T-TC-A-G-T-----AA---G-T-C-G-----G-G-T-G--TG-A-AA-CC--T-C-CA-G-G----CT-C-AA-----C-C-T-G-GAG-A-----C-G-CC-A--C-C-----C-GA-T-A--C-----T-G-C-TG-TG-A-C---T-A-G-A-G-T-C--C-AG---TA-G-G-----G-G-A-G--CG-T-----GG-A-ATT---C-C-T-G-GT--GT-A-G-CG-GT--G---A-A-A---TG-C-GC-AG--AT-A-TC--A-G--G-A-G-G-A-AC-A-CC--AG--T-G-GC-GAA-G-G-C-G-----G-C-G-C-T--CTG--G--GC-T-G-----G-A--A-C-T-GA--CA-C-T-G--A-GG--A-G-CG-A-AA-G-C--G-TG--GG-G--AG-C-G-AA-----CA--GG Bacteria(100);Actinobacteria(100);Actinobacteria(100);Acidimicrobidae(100);Acidimicrobiales(100);Acidimicrobineae(100);unclassified(100);unclassified(100);unclassified(100); |   |    |   |    |   |    |    |   |   |    |   |   |   |   |   |    |   |   |   |     |    |   |   |   |   |   |    |
| Otu0627                                                                                                                                                                                                                                                                                                                                                                                                                                                                                                                                                                                                                                                                                                                                                                                               | 0 | 0  | 0 | 0  | 0 | 0  | 0  | 0 | 0 | 0  | 0 | 0 | 0 | 0 | 0 | 0  | 0 | 0 | 0 | 0   | 0  | 0 | 0 | 0 | 0 | 0 | 0  |
|                                                                                                                                                                                                                                                                                                                                                                                                                                                                                                                                                                                                                                                                                                                                                                                                       | 0 | 0  | 0 | 0  | 0 | 0  | 0  | 0 | 0 | 0  | 0 | 0 | 0 | 0 | 0 | 0  | 0 | 0 | 0 | 0   | 18 | 0 | 0 | 0 | 0 | 0 | 0  |
|                                                                                                                                                                                                                                                                                                                                                                                                                                                                                                                                                                                                                                                                                                                                                                                                       | 0 | 0  | 0 | 0  | 0 | 0  | 0  | 0 | 0 | 0  | 0 | 0 | 0 | 0 | 0 | 0  | 0 | 0 | 0 | 0   | 0  | 0 | 0 | 0 | 0 | 0 | 12 |
|                                                                                                                                                                                                                                                                                                                                                                                                                                                                                                                                                                                                                                                                                                                                                                                                       | 0 | 0  | 0 | 0  | 0 | 0  | 0  | 0 | 0 | 0  | 0 | 0 | 0 | 0 | 0 | 0  | 0 | 0 | 0 | 0   | 0  | 0 | 0 | 0 | 0 | 0 | 0  |
| M02255_76_000000000-ADUNE_1_2112_26976_5287 C---GG---CT-AA-CT-----ACG-T-G-----C-C-A--G--CA-G-CCG-CG-----GT-A--A-T-AC-GT-----AG--G---TG-GC-GA-GC-----G-TT-G-T-C-G-----G--G-AA-A-G-T-----AA---G-T-C-A-----G-T-C-T--TA--A-AA-GT--G-C-GG-G-G----CT-C-AA-----C-C-C-C-G-T-G--A---G-G--G-G--A-T-----T-GA-A-A--C-----T-A-C--TT--T-T-C---T-T-G-A-G-T-G--C-AG---GA-G-A-----G-G-A-A--AG-C-----GG-A-ATT---C-C-T-A-GT--GT-A-G-CG-GT--G---A-A-A---TG-C-GT-AG--AT-A-TT--A-G--G-A-G-G-A-AC-A-CC--AG--T-G-GC-GAA-G-G-C-G-----G--C-T-T-T--CTG--G--AC-T-G-----T-A--A-C-T-GA--CA-C-T-G--A-GG--C-T-CG-A-AA-G-C--C-AG--GG-G--AG-C-G-AA-----CG--GG Bacteria(100);Firmicutes(100);Clostridia(100);Clostridiales(100);Veillonellaceae(100);unclassified(100);unclassified(100);unclassified(100);unclassified(100);            |   |    |   |    |   |    |    |   |   |    |   |   |   |   |   |    |   |   |   |     |    |   |   |   |   |   |    |
| Otu0628                                                                                                                                                                                                                                                                                                                                                                                                                                                                                                                                                                                                                                                                                                                                                                                               | 0 | 0  | 0 | 0  | 0 | 0  | 0  | 0 | 0 | 0  | 0 | 0 | 0 | 0 | 0 | 0  | 0 | 0 | 0 | 0   | 0  | 0 | 0 | 0 | 0 | 0 | 0  |
|                                                                                                                                                                                                                                                                                                                                                                                                                                                                                                                                                                                                                                                                                                                                                                                                       | 0 | 0  | 0 | 0  | 0 | 0  | 0  | 0 | 0 | 0  | 0 | 0 | 0 | 0 | 0 | 0  | 0 | 0 | 0 | 0   | 0  | 0 | 0 | 0 | 0 | 0 | 0  |
|                                                                                                                                                                                                                                                                                                                                                                                                                                                                                                                                                                                                                                                                                                                                                                                                       | 0 | 0  | 0 | 0  | 0 | 0  | 0  | 0 | 0 | 0  | 0 | 0 | 0 | 0 | 0 | 0  | 0 | 0 | 0 | 0   | 0  | 0 | 0 | 0 | 0 | 0 | 0  |
|                                                                                                                                                                                                                                                                                                                                                                                                                                                                                                                                                                                                                                                                                                                                                                                                       | 0 | 89 | 0 | 35 | 0 | 0  | 0  | 0 | 0 | 0  | 0 | 0 | 0 | 0 | 0 | 0  | 0 | 0 | 0 | 0   | 0  | 0 | 0 | 0 | 0 | 0 | 0  |
| M02255_77_000000000-ADUT3_1_1114_23985_15860 T---AC---GT-AG-GGG-----GCA-A-G-----C-G-T---T-GT-C-CGG-AA-----TA-A--T-T-GG-GC-----GT-A---AA-GG-GC-GC-----G-TA-G-G-C-G-----G--C-TC-G-G-T-----AA---G-T-C-T-----G                                                                                                                                                                                                                                                                                                                                                                                                                                                                                                                                                                                            |   |    |   |    |   |    |    |   |   |    |   |   |   |   |   |    |   |   |   |     |    |   |   |   |   |   |    |



|                                                                                                                                                                                                                                                                                                                                                                                                                                                                                                                                                                                                                                                                                                                                                                                                                      |     |   |   |   |   |   |   |   |   |   |   |   |   |   |   |    |    |   |   |   |   |   |   |   |   |   |   |   |
|----------------------------------------------------------------------------------------------------------------------------------------------------------------------------------------------------------------------------------------------------------------------------------------------------------------------------------------------------------------------------------------------------------------------------------------------------------------------------------------------------------------------------------------------------------------------------------------------------------------------------------------------------------------------------------------------------------------------------------------------------------------------------------------------------------------------|-----|---|---|---|---|---|---|---|---|---|---|---|---|---|---|----|----|---|---|---|---|---|---|---|---|---|---|---|
| Otu0630                                                                                                                                                                                                                                                                                                                                                                                                                                                                                                                                                                                                                                                                                                                                                                                                              | 0   | 0 | 0 | 0 | 0 | 0 | 0 | 0 | 0 | 0 | 0 | 0 | 0 | 0 | 0 | 0  | 0  | 0 | 0 | 1 | 5 | 0 | 2 | 0 | 0 | 0 | 0 | 0 |
|                                                                                                                                                                                                                                                                                                                                                                                                                                                                                                                                                                                                                                                                                                                                                                                                                      | 0   | 0 | 0 | 0 | 0 | 0 | 0 | 0 | 0 | 0 | 0 | 0 | 0 | 0 | 0 | 0  | 0  | 0 | 0 | 0 | 0 | 0 | 0 | 0 | 0 | 0 | 0 |   |
|                                                                                                                                                                                                                                                                                                                                                                                                                                                                                                                                                                                                                                                                                                                                                                                                                      | 0   | 0 | 0 | 0 | 0 | 0 | 0 | 0 | 0 | 0 | 0 | 3 | 0 | 0 | 0 | 0  | 0  | 0 | 0 | 0 | 0 | 0 | 0 | 0 | 0 | 0 | 0 |   |
|                                                                                                                                                                                                                                                                                                                                                                                                                                                                                                                                                                                                                                                                                                                                                                                                                      | 0   | 0 | 0 | 0 | 0 | 0 | 0 | 0 | 0 | 0 | 0 | 0 | 0 | 1 | 0 | 0  | 0  | 0 | 0 | 0 | 0 | 0 | 0 | 0 | 0 | 0 | 0 |   |
| M02255_76_000000000-ADUNE_1_2107_17385_14870 C---TC---GC-AG-AAT-----AAG-CACC---G-G-C---T--AACTCTGT-GC-----CA-G-C-A-GCC-GCG-----GT--A----AT-AC-AG-AG-----G-GT-G-C-A-G-----G--T-CT-G-T-T-----AA---G-T-C-G-----G-A-T-G--TG--A-AA-TC--C-C-TG-A-G----CT-T-AA-----C-T-T-A-G-G-A-A-T---T-G-C-A--T-A-----C-GA-T-A--C-----T-G-G-GA-G-A-C---T-A-G-A-G-T-A--T-GG----GA-G-A-----G-G-A-T--GG-T----AG-A-ATT---C-C-A-G-GT--GT-A-G-CG-GT--G---A-A-A---TG-C-GT-AG--AG-A-TC--T-G--G-A-G-G-A-AT-A-CC--GA--T-G--GC-GAA-G--G-C-A-----G-C-C-A-T--CTG--G--CC-T-A-----A-T--A-C-T-GA-CA-C-T-G--A-GG--T-A-CG-A-AA-G-C--A-TG--GG-G--AG-C-A-AA-----CA--GG Bacteria(100);Proteobacteria(100);Gammaproteobacteria(100);Pseudomonadales(100);Moraxellaceae(100);Acinetobacter(59);unclassified(59);unclassified(59);unclassified(59);               |     |   |   |   |   |   |   |   |   |   |   |   |   |   |   |    |    |   |   |   |   |   |   |   |   |   |   |   |
| Otu0631                                                                                                                                                                                                                                                                                                                                                                                                                                                                                                                                                                                                                                                                                                                                                                                                              | 0   | 0 | 0 | 0 | 0 | 0 | 0 | 0 | 0 | 0 | 0 | 0 | 0 | 0 | 0 | 0  | 0  | 0 | 0 | 0 | 0 | 0 | 0 | 0 | 0 | 0 | 0 |   |
|                                                                                                                                                                                                                                                                                                                                                                                                                                                                                                                                                                                                                                                                                                                                                                                                                      | 0   | 0 | 0 | 0 | 0 | 0 | 0 | 0 | 0 | 0 | 0 | 0 | 0 | 0 | 0 | 0  | 0  | 0 | 0 | 0 | 0 | 0 | 0 | 0 | 0 | 0 | 0 |   |
|                                                                                                                                                                                                                                                                                                                                                                                                                                                                                                                                                                                                                                                                                                                                                                                                                      | 0   | 7 | 0 | 0 | 0 | 0 | 0 | 0 | 0 | 0 | 0 | 0 | 0 | 0 | 0 | 0  | 0  | 0 | 0 | 0 | 0 | 0 | 0 | 0 | 0 | 0 | 0 |   |
|                                                                                                                                                                                                                                                                                                                                                                                                                                                                                                                                                                                                                                                                                                                                                                                                                      | 68  | 0 | 0 | 0 | 0 | 0 | 0 | 0 | 0 | 0 | 0 | 0 | 0 | 0 | 0 | 0  | 0  | 0 | 0 | 0 | 0 | 0 | 0 | 0 | 0 | 0 | 0 |   |
| M02255_77_000000000-ADUT3_1_1101_15626_10296 T---AC---GT-AG-GGT-----CCG-A-G-----C--G--T---T--GT-C-CGG-AA-----TT-A--T-T-GG-GC-----GT--A----AA-GG-GC-TC-----G-TA-G-G-C-G-----G--T-TT-G-T-C-----GC---G-T-C-G-----G-G-A--G--TG--A-AA-AC--T-C-AG-G-G----CT-T-AA-----C-T-C-T-G-A-G--C-G---T-G--C-T---T-T-----C-GA-T-A--C-----G--G-G-CA-G-A-C---T-T-G-A-G-G--G--A-TG---CA-G-G-----G-G-A-G--AA-T-----GG--A-ATT---C-C-T-G-GT--GT-A-G-CG-GT--G---G-A-A---TG-C-GC-AG--AT-A-TC--A-G--G-A-G-G-A-AC-A-CC--GG--T-G--GC-GAA-G--G-C-G-----G-T-T-C-T--CTG--G--GC-A-T-----T-T--C-C-T-GA-CG-C-T-G--A-GG--A-G-CG-A-AA-G-C--A-TG--GG-G--AG-C-G-AA-----CA--GG Bacteria(100);Actinobacteria(100);Actinobacteria(100);Actinobacteridae(100);Actinomycetales(100);Propionibacterineae(100);unclassified(91);unclassified(91);unclassified(91); |     |   |   |   |   |   |   |   |   |   |   |   |   |   |   |    |    |   |   |   |   |   |   |   |   |   |   |   |
| Otu0632                                                                                                                                                                                                                                                                                                                                                                                                                                                                                                                                                                                                                                                                                                                                                                                                              | 0   | 0 | 0 | 0 | 0 | 0 | 0 | 0 | 0 | 0 | 0 | 0 | 0 | 0 | 0 | 0  | 0  | 0 | 0 | 0 | 0 | 0 | 0 | 0 | 0 | 0 | 0 |   |
|                                                                                                                                                                                                                                                                                                                                                                                                                                                                                                                                                                                                                                                                                                                                                                                                                      | 0   | 0 | 0 | 0 | 0 | 0 | 0 | 0 | 0 | 0 | 0 | 0 | 0 | 0 | 0 | 0  | 0  | 0 | 0 | 0 | 0 | 0 | 0 | 0 | 0 | 0 | 0 |   |
|                                                                                                                                                                                                                                                                                                                                                                                                                                                                                                                                                                                                                                                                                                                                                                                                                      | 0   | 0 | 0 | 0 | 0 | 0 | 0 | 0 | 0 | 0 | 0 | 0 | 0 | 0 | 0 | 0  | 18 | 0 | 0 | 0 | 0 | 0 | 0 | 0 | 0 | 0 | 0 |   |
|                                                                                                                                                                                                                                                                                                                                                                                                                                                                                                                                                                                                                                                                                                                                                                                                                      | 0   | 0 | 0 | 0 | 0 | 0 | 4 | 0 | 0 | 0 | 0 | 0 | 0 | 0 | 0 | 0  | 0  | 0 | 0 | 0 | 0 | 0 | 0 | 0 | 0 | 0 | 0 |   |
| M02255_77_000000000-ADUT3_1_1111_27549_18897 T---AC---GT-AG-GCA-----GCG-A-G-----C--G--T---T--GT-T-CGG-AG-----TT-A--C-T-GG-GC-----GT--A----AA-GA-GT-GC-----G-TA-G-G-C-G-----G--T-GG-C-C-C-----AA---G-T-C-T-----G-G-T--G--TG--A-AA-TC--T-C-CC-G-G----CT-C-AA-----C-C-G-G-G-A-G--G-G---T-G--C-G--C-C-----G--GA-A-A--C-----T--G-G--GT--T-G-C---T-T-G-A-G-T-A--C-TG---GA-G-A-----G-G-C-A--AG-C-----GG--A-ATT---C-C-T-G-GT--GT-A-G-CG-GT--G---A-A-A---TG-C-GT-AG--AT-A-TC--A-G--G-A-G-G-A-AC-A-CC--CG--T-G--GT-GTA-G--A-C-G-----G--C-T-T-G--CTG--G--AC-A-G-----T-C--A-C-T-GA-CG-C-T-G--A-GG--C-A-CG-A-AA-G-C--G-TG--GG-G--AG-C-A-AA-----CA--GG Bacteria(100);unclassified(100);unclassified(100);unclassified(100);unclassified(100);unclassified(100);unclassified(100);unclassified(100);unclassified(100);              |     |   |   |   |   |   |   |   |   |   |   |   |   |   |   |    |    |   |   |   |   |   |   |   |   |   |   |   |
| Otu0633                                                                                                                                                                                                                                                                                                                                                                                                                                                                                                                                                                                                                                                                                                                                                                                                              | 0   | 0 | 0 | 0 | 0 | 0 | 0 | 0 | 0 | 0 | 0 | 0 | 0 | 0 | 0 | 0  | 0  | 0 | 0 | 0 | 0 | 0 | 0 | 0 | 0 | 0 | 0 |   |
|                                                                                                                                                                                                                                                                                                                                                                                                                                                                                                                                                                                                                                                                                                                                                                                                                      | 0   | 0 | 0 | 0 | 0 | 0 | 0 | 0 | 0 | 0 | 0 | 0 | 0 | 0 | 0 | 46 | 0  | 0 | 0 | 0 | 0 | 0 | 0 | 0 | 0 | 0 | 0 |   |
|                                                                                                                                                                                                                                                                                                                                                                                                                                                                                                                                                                                                                                                                                                                                                                                                                      | 0   | 0 | 0 | 0 | 0 | 0 | 0 | 0 | 0 | 0 | 0 | 0 | 0 | 0 | 0 | 0  | 0  | 0 | 0 | 0 | 0 | 0 | 0 | 0 | 0 | 0 | 0 |   |
|                                                                                                                                                                                                                                                                                                                                                                                                                                                                                                                                                                                                                                                                                                                                                                                                                      | 316 | 0 | 0 | 0 | 0 | 0 | 0 | 0 | 0 | 0 | 0 | 0 | 0 | 0 | 0 | 0  | 0  | 0 | 0 | 0 | 0 | 0 | 0 | 0 | 0 | 0 | 0 |   |
| M02255_77_000000000-ADUT3_1_1105_6715_19018 T---AC---GG-AG-GAT-----GCA-A-G-----C--G--T---T--AT-C-CGG-AA-----TG-A--T-T-GG-GC-----GT--A----AA-GC-GT-CC-----G-CA-G-G-T-G-----G--C-AA-T-G                                                                                                                                                                                                                                                                                                                                                                                                                                                                                                                                                                                                                                |     |   |   |   |   |   |   |   |   |   |   |   |   |   |   |    |    |   |   |   |   |   |   |   |   |   |   |   |



Otu0635 0 0 0 0 0 0 0 0 0 0 0 0 0 5 0 0 0 0 0 0 3 7 0 0 0 0 0 0  
0 1 0 0 0 0 0 0 0 0 35 0 0 0 0 0 0 0 0 0 0 0 0 0 0 0 0 0  
0 0 0 0 0 0 0 0 0 0 0 0 0 0 0 0 0 0 0 0 0 0 0 0 0 0 0 0  
0 0 0 0 0 0 0 0 0 0 0 0 0 0 0 0 0 0 0 0 0 0 0 0 0 0 0  
M02255\_77\_000000000-ADUT3\_1\_1119\_2882\_9488 T---AC---GA-AG-GGG-----GCT-A-G-----C--G--T---T--GT-T-CGG-AA-----TC-A--C-T--GG-GC-----GT--A----AA-GC-GT-AC-----G-TA-G-G-C-G-----G--A-TC-G-T-T-----AA-  
---G-T-C-A-----G-G-G--G-TG--A-AA-TC--C-C-GA-G-G----CT-C-AA-----C-C-T-C-G-G-A--A-C---T-G--C-C---T-T-----T--GA-T-A---C-----T--G-G--CG--A-T-C---T-T-G-A-G-T--C---C-GG----GA-G-A-----G-G-T-G---AG-T-----GG--A--ACT---C-C-T-A-  
GT--GT-A-G-AG-GT--G---A--A-A---TT-C-GT-AG--AT-A-TT--A-G--G-A-A-G-A-AC-A-CC---AG--T--G--GC-GAA-G--G-C--G-----G--C-T-C-A---CTG--G--CC-C-G-----G-A---A-C-T--GA--CG-C-T-G--A-GG--T-A-CG-A-AA-G-C---G-TG--GG-G--AG-  
C-A-AA-----CA--GG Bacteria(100);Proteobacteria(100);Alphaproteobacteria(100);Rhizobiales(100);unclassified(91);unclassified(91);unclassified(91);unclassified(91);unclassified(91);

Otu0636 0 0 0 0 0 0 0 0 0 0 0 0 0 0 0 0 0 0 0 0 0 0 0 0 0 0 0 0  
0 0 0 0 0 0 0 0 0 0 0 0 0 0 0 0 0 0 0 0 0 0 0 0 0 0 0 0  
0 0 0 0 0 0 0 0 0 0 0 0 0 0 0 0 0 0 40 0 0 0 0 0 0 0 0 0  
0 0 24 0 0 0 6 0 0 0 0 0 0 0 0 0 0 0 0 0 0 0 0 0 0 0 0 0  
M02255\_77\_000000000-ADUT3\_1\_1114\_16288\_13793 T---AC---GG-AG-GGG-----GCT-A-G-----C--G--T---T--GT-T-CGG-AA-----TT-A--C-T--GG-GC-----GT--A----AA-GC-GC-AC-----G-TA-G-G-C-G-----G--C-TT-T-A-C-----  
-----AA---G-T-C-A-----G-A-G--G-TG--A-AA-GC--C-C-GG-A-G----CT-C-AA-----C-T-C-C-G-G-A--A-T---T-G--C-C---T-T-----T--GA-G-A---C-----T--G-T--AT--C-G-C---T-T-G-A-A-C--A---C-GG----GA-G-A-----G-G-T-G---AG-T-----GG--A--ATT---C-  
C-G-A-GT--GT-A-G-AG-GT--G---A--A-A---TT-C-GT-AG--AT-A-TT--C-G--G-A-A-G-A-AC-A-CC---AG--T--G--GC-GAA-G--G-C--G-----G--C-T-C-A---CTG--G--AC-C-G-----T-T---G-T-T--GA--CG-C-T-G--A-GG--T-G-CG-A-AA-G-C---G-TG--GG-G-  
-AG-C-A-AA-----CA--GG Bacteria(100);Proteobacteria(100);Alphaproteobacteria(100);unclassified(92);unclassified(92);unclassified(92);unclassified(92);unclassified(92);unclassified(92);

Otu0637 0 0 0 0 0 0 0 0 0 0 0 0 0 0 0 0 0 0 0 0 0 0 0 0 0 0 0 0  
0 0 0 0 0 0 0 0 0 0 0 0 0 0 0 0 0 0 0 0 0 0 0 0 0 0 0 0  
0 0 0 0 0 0 0 0 0 0 0 0 0 0 0 0 0 0 0 0 0 0 4 0 0 0 0 0  
0 0 0 0 0 0 0 0 0 0 0 0 0 0 0 16 0 0 0 0 0 0 0 0 0 0 0  
M02255\_77\_000000000-ADUT3\_1\_1108\_19390\_22270 T---AC---GA-AG-GGG-----GCT-A-G-----C--G--T---T--GC-T-CGG-AA-----TG-A--C-T--GG-GC-----GT--A----AA-GG-GC-GC-----G-TA-G-G-C-G-----G--C-AC-G-G-A---  
-----CA---G-T-C-A-----G-G-C--G-TG--A-AA-TT--C-C-TG-G-T----CT-T-AA-----C-C-T-G-G-G-G--G-C---T-G--C-G---T-T-----T--GA-T-A---C-----G--T-T--CG--A-G-C---T-A-G-A-G-G--A---T-GG----AA-G-A-----G-G-C-T---CG-T-----GG--A--ATT---  
C-C-C-A-GT--GT-A-G-AG-GT--G---A--A-A---TT-C-GT-AG--AT-A-TT--G-G--G-A-A-G-A-AC-A-CC---GG--T--G--GC-GAA-G--G-C--G-----G--C-G-A-G---CTG--G--TC-C-A-----T-T---A-C-T--GA--CG-C-T-G--A-GG--C-G-CG-A-AA-G-C---G-TG--  
GG-G--AG-C-A-AA-----CA--GG Bacteria(100);Proteobacteria(100);Alphaproteobacteria(100);Rhodospirillales(100);Acetobacteraceae(100);unclassified(100);unclassified(100);unclassified(100);unclassified(100);

Otu0638 0 0 0 0 0 0 0 0 0 0 0 0 0 0 2 0 0 0 0 0 2 10 0 2 0 0 0 0 2  
0 8 6 26 0 0 0 12 0 20 8 13 4 18 0 3 3 0 0 41 22 0 0 46 0 0 0 0 1  
1 0 0 0 0 0 0 0 0 0 0 0 0 0 0 0 0 0 0 0 1 0 0 0 0 0 10 0  
5 0 0 10 0 0 1 0 0 1 0 0 2 11 0 0 0 0 0 0 0 0 0 0 0 0 0 0  
M02255\_77\_000000000-ADUT3\_1\_2102\_15172\_9536 G---AC---GG-GG-GGG-----GCA-A-G-----T--G--T---T--AT-T-CGG-AA-----TG-A--C-T--AG-GC-----GT--A----AA-GG-GC-AC-----G-TA-G-G-C-G-----G---TG-A-A-T-----  
CT---G-C-A-G-----G-G-T--T--GG-AAGGGAAA--G-T-CG-C-C---AA-C-AA-----T-T-G-G-C-G-G--G-G---T-G--C-T---T-T-----C--GG-A-A---C-----C--A-A--TT--C-A-C---T-T-G-A-G-T--G---A-GA----TA-G-G-----G-G-A-G---AG-T-----GG--A--ATT---T-  
C-G-T-GT--GT-A-G-GG-AT--C---A--A-A---TC-C-GG-AG--AT-C-TA--C-G--A-A-G-G-A-AC-G-CC---AA--A--A--GC-GAA-G--G-C--A-----G--C-T-C-T---CTG--G--GT-C-T-----A-C---A-C-T--GA--CG-C-T-G--G-GG--T-G-CG-A-AA-G-C---A-TG--GG-G-  
-AG-C-A-AA-----CA--GG Bacteria(100);unclassified(100);unclassified(100);unclassified(100);unclassified(100);unclassified(100);unclassified(100);unclassified(100);

Otu0639 0 0 0 0 0 0 0 0 0 0 0 0 0 0 0 0 0 0 0 0 0 0 0 0 0 0 0 12 0  
0 0 0 0 0 0 0 0 0 0 0 0 0 0 0 0 0 0 0 0 0 0 0 0 0 0 0 0  
0 0 0 0 0 0 0 0 0 0 0 0 0 0 0 0 0 0 0 0 0 0 0 0 0 0 0 0  
0 0 46 0 0 0 0 0 0 0 0 0 0 0 0 0 0 0 0 0 0 0 0 0 0 0 0  
M02255\_77\_000000000-ADUT3\_1\_1112\_19727\_7325 T---AC---GA-AG-GGG-----GCT-A-G-----C--G--T---T--GC-T-CGG-AA-----TG-A--C-T--GG-GC-----GT--A----AA-GG-GC-GC-----G-TA-G-G-C-G-----G--A-TC-A-C-G-----  
CA---G-T-C-A-----G-A-T--G-TG--A-AA-TT--C-C-TG-G-G----CT-T-AA-----C-C-T-G-G-G-G--G-C---T-G--C-A---T-T-----T--GA-G-A---C-----G--T-G--TG--G-T-C---T-A-G-A-G-T--G---T-GA----AA-G-A-----G-G-G-T---CG-T-----GG--A--ATT---C-C-C-  
A-GT--GT-A-G-AG-GT--G---A--A-A---TT-C-GT-AG--AT-A-TT--G-G--G-A-A-G-A-AC-A-CC---GG--T--G--GC-GAA-G--G-C--G-----G--C-G-A-C---CTG--G--TT-C-A-----T-A---A-C-T--GA--CG-C-T-G--A-GG--C-G-CG-A-AA-G-C---G-TG--GG-G-  
AG-C-A-AA-----CA--GG Bacteria(100);Proteobacteria(100);Alphaproteobacteria(100);Rhodospirillales(100);Acetobacteraceae(100);unclassified(100);unclassified(100);unclassified(100);unclassified(100);



|                                                                                                                                                                                                                                                                                                                                                                                                                                                                                                                                                                                                                                                                                                                                                                                                                                                             |   |    |      |   |   |   |     |   |     |   |   |   |   |    |   |    |    |   |   |   |   |   |    |   |   |    |   |
|-------------------------------------------------------------------------------------------------------------------------------------------------------------------------------------------------------------------------------------------------------------------------------------------------------------------------------------------------------------------------------------------------------------------------------------------------------------------------------------------------------------------------------------------------------------------------------------------------------------------------------------------------------------------------------------------------------------------------------------------------------------------------------------------------------------------------------------------------------------|---|----|------|---|---|---|-----|---|-----|---|---|---|---|----|---|----|----|---|---|---|---|---|----|---|---|----|---|
| Otu0640                                                                                                                                                                                                                                                                                                                                                                                                                                                                                                                                                                                                                                                                                                                                                                                                                                                     | 0 | 0  | 0    | 0 | 0 | 0 | 0   | 0 | 76  | 0 | 0 | 0 | 0 | 0  | 0 | 0  | 0  | 0 | 0 | 0 | 0 | 0 | 0  | 0 | 0 | 0  | 0 |
|                                                                                                                                                                                                                                                                                                                                                                                                                                                                                                                                                                                                                                                                                                                                                                                                                                                             | 0 | 0  | 0    | 0 | 0 | 0 | 0   | 0 | 0   | 0 | 0 | 0 | 0 | 0  | 0 | 0  | 0  | 0 | 0 | 0 | 0 | 0 | 0  | 0 | 0 | 0  |   |
|                                                                                                                                                                                                                                                                                                                                                                                                                                                                                                                                                                                                                                                                                                                                                                                                                                                             | 0 | 0  | 0    | 0 | 0 | 0 | 0   | 0 | 0   | 0 | 0 | 0 | 0 | 0  | 0 | 0  | 0  | 0 | 0 | 0 | 0 | 0 | 0  | 0 | 0 | 0  |   |
|                                                                                                                                                                                                                                                                                                                                                                                                                                                                                                                                                                                                                                                                                                                                                                                                                                                             | 0 | 0  | 138  | 0 | 0 | 0 | 0   | 0 | 0   | 0 | 0 | 0 | 0 | 0  | 0 | 0  | 0  | 0 | 0 | 0 | 0 | 0 | 0  | 0 | 0 |    |   |
| M02255_77_000000000-ADUT3_1_1112_4712_19514 T---AC---GT-AG-GGG-----GCA-A-G-----C--G--T---T-AT-C-CGG-AT-----TT-A--C-T--GG-GT-----GT--A----AA-GG-GA-GT-----G-TA-G-G-T-G-----G--T-CT-G-G-C-----AA-<br>---G-T-C-A-----G-A-T--G--TG--A-AA-GC--C-C-GG-G-G----CT-C-AA-----C-T-C-C-G-G-G--A-C---T-G--C-A--T--T-----T-GA-A-A--C-----T--G-T--CA--G-A-C---T-A-G-A-G-T--G---C-AG----GA-G-A-----G-G-A-A--AG-T-----GG--A--ATT---C-C-T-A-<br>GT--GT-A-G-CG-GT--G---A--A-A---TG-C-GT-AG--AT-A-TT--A-G--G-A-A-G-A-AC-A-CC---AG--T--G--GC-GAA-G--G-C--G-----G--C-T-T-T---CTG--G--AC-T-G-----T-A---A-C-T--GA--CA-C-T-G--A-GG--C-T-CG-A--AA-G-C--G-TG--GG-G--AG-C-<br>A-AA-----CA--GG Bacteria(100);Firmicutes(100);Clostridia(100);Clostridiales(100);Lachnospiraceae(100);unclassified(100);unclassified(100);unclassified(100);unclassified(100);                            |   |    |      |   |   |   |     |   |     |   |   |   |   |    |   |    |    |   |   |   |   |   |    |   |   |    |   |
| Otu0641                                                                                                                                                                                                                                                                                                                                                                                                                                                                                                                                                                                                                                                                                                                                                                                                                                                     | 0 | 0  | 0    | 0 | 0 | 0 | 0   | 0 | 0   | 0 | 0 | 0 | 0 | 0  | 0 | 0  | 0  | 0 | 0 | 0 | 0 | 0 | 0  | 0 | 0 | 0  |   |
|                                                                                                                                                                                                                                                                                                                                                                                                                                                                                                                                                                                                                                                                                                                                                                                                                                                             | 0 | 0  | 0    | 0 | 0 | 0 | 0   | 0 | 0   | 0 | 0 | 0 | 0 | 0  | 0 | 0  | 0  | 0 | 0 | 0 | 0 | 0 | 0  | 0 | 0 | 27 |   |
|                                                                                                                                                                                                                                                                                                                                                                                                                                                                                                                                                                                                                                                                                                                                                                                                                                                             | 0 | 0  | 0    | 0 | 0 | 0 | 0   | 0 | 0   | 0 | 0 | 0 | 0 | 0  | 0 | 0  | 0  | 0 | 0 | 0 | 0 | 0 | 0  | 0 | 0 | 18 |   |
|                                                                                                                                                                                                                                                                                                                                                                                                                                                                                                                                                                                                                                                                                                                                                                                                                                                             | 0 | 0  | 57   | 0 | 0 | 0 | 0   | 0 | 0   | 0 | 0 | 0 | 0 | 0  | 0 | 0  | 0  | 0 | 0 | 0 | 0 | 0 | 0  | 0 | 0 |    |   |
| M02255_77_000000000-ADUT3_1_1113_18640_16642 G---AC---GT-AG-GGC-----GCG-A-G-----C--G--T---T--GT-C-CGG-AT-----TT-A--T-T--GG-GC-----GT--A----AA-GA-GC-TC-----G-TA-G-G-C-G-----G--C-TC-G-T-T-----<br>-----GC---G-T-C-G-----G-C-T-G--TG--A-AA-AC--C-C-GC-A-G----CT-C-AA-----C-T-G-T-G-G-G--C-T---T-G--C-A--G--C-----C--GA-T-A--C-----G--G-G--CG--G-G-C---T-G-G-A-G-T--T---C-GG----TA-G-G-----G-G-A-G--AC-T-----GG--A--ATT---<br>C-C-T-G-GT--GT-A-G-CG-GT--G---A--A-A---TG-C-GC-AG--AT-A-TC--A-G--G-A-G-G-A-AC-A-CC---GG--T--G--GC-GAA-G--G-C--G-----G--G-T-C-T---CTG--G--GC-C-G-----A-T---A-C-T--GA--CG-C-T-G--A-GG--A-G-CG-A--AA-G-C--G-TG--<br>GG-G--AG-C-G-AA-----CA--GG Bacteria(100);Actinobacteria(100);Actinobacteria(100);Actinobacteridae(100);Actinomycetales(100);Micromonosporineae(100);Micromonosporaceae(100);unclassified(56);unclassified(56); |   |    |      |   |   |   |     |   |     |   |   |   |   |    |   |    |    |   |   |   |   |   |    |   |   |    |   |
| Otu0642                                                                                                                                                                                                                                                                                                                                                                                                                                                                                                                                                                                                                                                                                                                                                                                                                                                     | 0 | 97 | 1882 | 0 | 0 | 0 | 107 | 6 | 258 | 0 | 0 | 0 | 0 | 0  | 0 | 0  | 0  | 1 | 0 | 0 | 0 | 0 | 0  | 0 | 0 | 0  |   |
|                                                                                                                                                                                                                                                                                                                                                                                                                                                                                                                                                                                                                                                                                                                                                                                                                                                             | 0 | 0  | 0    | 0 | 0 | 0 | 0   | 0 | 0   | 0 | 0 | 0 | 0 | 0  | 0 | 0  | 0  | 0 | 0 | 0 | 0 | 0 | 0  | 0 | 0 | 0  |   |
|                                                                                                                                                                                                                                                                                                                                                                                                                                                                                                                                                                                                                                                                                                                                                                                                                                                             | 0 | 0  | 0    | 0 | 0 | 0 | 0   | 0 | 0   | 0 | 0 | 3 | 0 | 0  | 2 | 15 | 39 | 0 | 0 | 0 | 0 | 0 | 0  | 0 | 0 | 0  |   |
|                                                                                                                                                                                                                                                                                                                                                                                                                                                                                                                                                                                                                                                                                                                                                                                                                                                             | 0 | 0  | 0    | 0 | 0 | 0 | 0   | 0 | 0   | 0 | 0 | 0 | 0 | 0  | 0 | 0  | 0  | 0 | 0 | 0 | 0 | 7 | 99 | 0 | 0 |    |   |
| M02255_77_000000000-ADUT3_1_2111_7601_16394 T---AC---GT-AG-GGA-----GCG-A-G-----C--G--T---T--GT-C-CGG-AA-----TT-A--C-T--GG-GT-----GT--A----AA-GG-GA-GC-----G-TA-G-G-C-G-----G--G-AT-G-G-C-----<br>AA---G-T-C-A-----G-A-T--G--TG--A-AA-AC--T-A-TG-G-G----CT-C-AA-----C-C-C-A-T-A-G--A-C---T-G--C-A--T--T-----T-GA-A-A--C-----T--G-T--TG--T-G-C---T-T-G-A-G-T--G---A-GG----TA-G-A-----G-G-T-A--AG-C-----GG--A--ATT---C-C-T-<br>G-GT--GT-A-G-CG-GT--G---A--A-A---TG-C-GT-AG--AG-A-TC--A-G--G-A-G-G-A-AC-A-TC---GG--T--G--GC-GAA-G--G-C--G-----G--C-T-T-A---CTG--G--GC-C-T-----T-T---A-C-T--GA--CG-C-T-G--A-GG--C-T-CG-A--AA-G-C--G-TG--GG-G--<br>AG-C-A-AA-----CA--GG Bacteria(100);Firmicutes(100);Clostridia(100);Clostridiales(100);Ruminococcaceae(100);Ruminococcus(100);unclassified(100);unclassified(100);unclassified(100);                            |   |    |      |   |   |   |     |   |     |   |   |   |   |    |   |    |    |   |   |   |   |   |    |   |   |    |   |
| Otu0643                                                                                                                                                                                                                                                                                                                                                                                                                                                                                                                                                                                                                                                                                                                                                                                                                                                     | 0 | 0  | 0    | 0 | 0 | 0 | 0   | 0 | 0   | 0 | 0 | 0 | 0 | 0  | 0 | 0  | 0  | 0 | 0 | 0 | 0 | 0 | 0  | 0 | 0 | 0  |   |
|                                                                                                                                                                                                                                                                                                                                                                                                                                                                                                                                                                                                                                                                                                                                                                                                                                                             | 0 | 0  | 0    | 0 | 0 | 0 | 0   | 0 | 0   | 0 | 0 | 0 | 0 | 18 | 0 | 0  | 0  | 0 | 0 | 0 | 0 | 0 | 0  | 0 | 0 | 0  |   |
|                                                                                                                                                                                                                                                                                                                                                                                                                                                                                                                                                                                                                                                                                                                                                                                                                                                             | 0 | 0  | 0    | 0 | 0 | 0 | 0   | 0 | 0   | 0 | 0 | 0 | 0 | 0  | 0 | 0  | 0  | 0 | 0 | 0 | 0 | 0 | 0  | 0 | 0 | 0  |   |
|                                                                                                                                                                                                                                                                                                                                                                                                                                                                                                                                                                                                                                                                                                                                                                                                                                                             | 0 | 0  | 12   | 0 | 0 | 0 | 0   | 0 | 0   | 0 | 0 | 0 | 0 | 0  | 0 | 0  | 0  | 0 | 0 | 0 | 0 | 0 | 0  | 0 | 0 |    |   |
| M02255_77_000000000-ADUT3_1_2116_18700_16534 C---TC---CG-TG-CCA-----GCAGCCG-----CG-G--T---A--AT-A-CGG-AG-----GG-T--G-C--AA-GC-----GT--T-----AT-CC-GG-AT-----T-TA-G-C-T-G-----G--G-TC-T-G-T----<br>-----AA---G-T-C-A-----G-T-G--G--TG--A-AA-TC--T-C-CG-A-G----CT-T-AA-----C-T-C-G-G-A-A--A-C---T-G--C-C---A--T-----T--GA-T-A--C-----T--A-T--AG--A-T-C---T-T-G-A-A-T--T---A-TC---TG-G-A-----G-G-T-A--AG-C-----GG--A--ATA---T-<br>G-T-C-AT--GT-A-G-CG-GT--G---A--A-A---TG-C-TT-AG--AT-A-TG--A-C--A-T-A-G-A-AC-A-CC---AA--T--T--GC-GAA-G--G-C--A-----G--C-T-T-A---CTA--C--GG-A-T-----C-G---A-T-T--GA--CA-C-T-G--A-GG--C-A-CG-A--AA-G-C--G-TG--GG-G--<br>AT-C-A-AA-----CA--GG Bacteria(100);Bacteroidetes(100);Sphingobacteria(100);Sphingobacteriales(100);Chitinophagaceae(100);unclassified(100);unclassified(100);unclassified(100);unclassified(100);       |   |    |      |   |   |   |     |   |     |   |   |   |   |    |   |    |    |   |   |   |   |   |    |   |   |    |   |
| Otu0644                                                                                                                                                                                                                                                                                                                                                                                                                                                                                                                                                                                                                                                                                                                                                                                                                                                     | 0 | 0  | 0    | 0 | 0 | 0 | 0   | 0 | 0   | 0 | 0 | 0 | 0 | 0  | 0 | 0  | 0  | 0 | 0 | 0 | 0 | 0 | 0  | 0 | 0 | 0  |   |
|                                                                                                                                                                                                                                                                                                                                                                                                                                                                                                                                                                                                                                                                                                                                                                                                                                                             | 0 | 0  | 0    | 0 | 0 | 0 | 0   | 0 | 0   | 0 | 0 | 0 | 0 | 0  | 0 | 0  | 0  | 0 | 0 | 0 | 0 | 0 | 0  | 0 | 0 | 0  |   |
|                                                                                                                                                                                                                                                                                                                                                                                                                                                                                                                                                                                                                                                                                                                                                                                                                                                             | 0 | 0  | 0    | 0 | 0 | 0 | 0   | 0 | 0   | 0 | 0 | 0 | 0 | 0  | 0 | 0  | 0  | 0 | 0 | 0 | 0 | 0 | 0  | 0 | 0 | 0  |   |
|                                                                                                                                                                                                                                                                                                                                                                                                                                                                                                                                                                                                                                                                                                                                                                                                                                                             | 0 | 0  | 90   | 0 | 0 | 0 | 0   | 0 | 0   | 0 | 0 | 0 | 0 | 0  | 0 | 0  | 0  | 0 | 0 | 0 | 0 | 0 | 0  | 0 | 0 |    |   |
| M02255_76_000000000-ADUNE_1_2115_21736_8913 C---AC---GT-AG-GGG-----GCG-A-G-----C--G--T---T--GT-C-CGG-AT-----TT-A--T-T--GG-GC-----GT--A----AA-GA-GC-TC-----G-TA-----G-----G---TC-G-G-----A-----<br>-----T--G--TG--A-AA-AC--T-C-CA-G-G----CT-C-AA-----C-T-T-G-G-A-G--A-----C-G-CC-A--T--T-----C--GA-T-A--C-----T--G-C--GA-TG-A-C---T-T-G-A-G-T--C---C-GG----TA-G-G-----G-G-A-G--TG-T-----GG--A--ATT---C-C-T-G-GT--GT-<br>A-G-CG-GT--G---A--A-A---TG-C-GC-AG--AT-A-TC--A-G--G-A-G-G-A-AC-A-CC---GG--C--G--GC-GAA-G--G-C--G-----G--C-A-C-T---CTG--G--GC-C-G-----G-T---A-C-T--GA--CG-C-T-G--A-GG--A-G-CG-A--AA-G-C--G-TG--GG-T--AG-C-A-AA-<br>-----CA--GG Bacteria(100);Actinobacteria(100);Actinobacteria(100);unclassified(100);unclassified(100);unclassified(100);unclassified(100);unclassified(100);unclassified(100);                                     |   |    |      |   |   |   |     |   |     |   |   |   |   |    |   |    |    |   |   |   |   |   |    |   |   |    |   |



|                                              |                                                                                                                                              |                                                                                                                                                                                                                  |                                                                                                                                                                                                          |                       |                                                                                                                                                                        |    |     |    |     |    |     |   |   |   |   |     |     |   |   |   |   |   |   |     |     |   |   |   |
|----------------------------------------------|----------------------------------------------------------------------------------------------------------------------------------------------|------------------------------------------------------------------------------------------------------------------------------------------------------------------------------------------------------------------|----------------------------------------------------------------------------------------------------------------------------------------------------------------------------------------------------------|-----------------------|------------------------------------------------------------------------------------------------------------------------------------------------------------------------|----|-----|----|-----|----|-----|---|---|---|---|-----|-----|---|---|---|---|---|---|-----|-----|---|---|---|
| Otu0645                                      | 0                                                                                                                                            | 338                                                                                                                                                                                                              | 60                                                                                                                                                                                                       | 0                     | 0                                                                                                                                                                      | 1  | 313 | 14 | 481 | 0  | 0   | 0 | 0 | 0 | 0 | 0   | 0   | 1 | 0 | 0 | 1 | 0 | 0 | 0   | 1   | 0 | 0 |   |
|                                              | 0                                                                                                                                            | 5                                                                                                                                                                                                                | 67                                                                                                                                                                                                       | 0                     | 0                                                                                                                                                                      | 0  | 0   | 0  | 5   | 16 | 60  | 0 | 0 | 0 | 0 | 0   | 105 | 0 | 1 | 0 | 0 | 0 | 0 | 0   | 0   | 0 | 0 |   |
|                                              | 0                                                                                                                                            | 0                                                                                                                                                                                                                | 0                                                                                                                                                                                                        | 0                     | 0                                                                                                                                                                      | 0  | 0   | 0  | 0   | 0  | 3   | 0 | 0 | 0 | 4 | 33  | 27  | 0 | 0 | 0 | 0 | 0 | 0 | 0   | 1   | 0 | 0 |   |
|                                              | 0                                                                                                                                            | 0                                                                                                                                                                                                                | 0                                                                                                                                                                                                        | 0                     | 0                                                                                                                                                                      | 11 | 0   | 0  | 35  | 0  | 189 | 0 | 0 | 1 | 0 | 0   | 0   | 0 | 0 | 0 | 0 | 0 | 0 | 148 | 161 | 0 |   |   |
| M02255_77_000000000-ADUT3_1_2113_24365_8959  | T---AC--GT-AG-GGG-----GCA-A-G-----C-G-T--T--AT-C-CGG-AT-----TT-A-C-T-GG-GT-----GT--A----AA-GG-GA-GC-----G-TA-G-A-C-G-----G-C-AA-G-G-C-----   | AA---G-T-C-T-----G-A-T--G--TG--A-A-AGC--C-C-AG-G-G----CT-T-AA-----C-C-C-T-G-G-G-A-C---T-G-C-A--T-T-----G--GA-A-A--C-----T-G-T-CT--G-G-C---T-C-G-A-G-T-G--C-CG---GA-G-A-----G-G-T-A--AG-C-----GG-A-ATT---C-C-T-   | A-GT--GT-A-G-CG-GT--G---A-A-A---TG-C-GT-AG--AT-A-TT--AG--G-A-A-G-A-AC-A-CC--AG--T-G-GC-GAA-G-G-C-G-----G--C-T-TA---CTG-G--AC-G-G-----TA---A-C-T-GA--CG-T-T-G--A-GG--C-T-CG-A-AA-G-C--G-TG--GG-G--        | AG-C-A-AA-----CA--GG  | Bacteria(100);Firmicutes(100);Clostridia(100);Clostridiales(100);Lachnospiraceae(100);Incertae_Sedis(100);unclassified(100);unclassified(100);unclassified(100);       |    |     |    |     |    |     |   |   |   |   |     |     |   |   |   |   |   |   |     |     |   |   |   |
| Otu0646                                      | 0                                                                                                                                            | 0                                                                                                                                                                                                                | 0                                                                                                                                                                                                        | 0                     | 0                                                                                                                                                                      | 0  | 0   | 0  | 0   | 0  | 0   | 0 | 0 | 0 | 0 | 0   | 0   | 0 | 0 | 0 | 0 | 0 | 0 | 0   | 0   | 0 | 0 |   |
|                                              | 0                                                                                                                                            | 0                                                                                                                                                                                                                | 0                                                                                                                                                                                                        | 0                     | 0                                                                                                                                                                      | 0  | 0   | 0  | 0   | 0  | 0   | 0 | 0 | 0 | 0 | 0   | 0   | 0 | 0 | 0 | 0 | 0 | 0 | 0   | 0   | 0 | 0 |   |
|                                              | 0                                                                                                                                            | 0                                                                                                                                                                                                                | 0                                                                                                                                                                                                        | 0                     | 0                                                                                                                                                                      | 0  | 0   | 0  | 0   | 0  | 0   | 0 | 0 | 0 | 0 | 0   | 0   | 0 | 0 | 0 | 0 | 0 | 0 | 0   | 0   | 0 | 0 |   |
|                                              | 0                                                                                                                                            | 0                                                                                                                                                                                                                | 63                                                                                                                                                                                                       | 0                     | 0                                                                                                                                                                      | 0  | 0   | 0  | 0   | 0  | 0   | 0 | 0 | 0 | 0 | 0   | 0   | 0 | 0 | 0 | 0 | 0 | 0 | 0   | 0   | 0 | 0 |   |
| M02255_76_000000000-ADUNE_1_1110_23710_13030 | .....AC---T-AC-GT-----GCC-A-G-----C--A-G---C-CG-C-GGT-AA-----TA-C-G-T-AG-GT-----GG--C---AA-GC-G-TT-----G---T-C-C-G-----G--T-CT-T-T-T-----    | AA---G-T-C-T-----G-A-T--G--TG--A-AA-GC--C-C-CC-G-G----CT-T-AA-----C-C-G-G-G-G-A-G---G-GT-C-A--T-T-----G--GA-A-A--C-----T-G-G-AA--G-A-C---T-G-G-A-G-T-G--C-AG---AA-G-A-----G-G-A-G--AG-T-----GG--A-ATT---C-C-     | A-C-GT--GT-A-G-CG-GT--G---A-A-A---TG-C-GT-AG--AT-A-TG--T-G--G-A-G-G-A-AC-A-CC--AG--T-G-GC-GAA-G-G-C-G-----A-C-T-C-T---CTG-G--TC-T-G-----T-A---A-C-T-GA--CG-C-T-G--A-GG--C-G-CG-A-AA-G-C--G-TG--GG-G--    | AG-C-A-AA-----CA--GG  | Bacteria(100);Firmicutes(100);Bacilli(100);Bacillales(100);Listeriaceae(100);Listeria(100);unclassified(100);unclassified(100);unclassified(100);                      |    |     |    |     |    |     |   |   |   |   |     |     |   |   |   |   |   |   |     |     |   |   |   |
| Otu0647                                      | 0                                                                                                                                            | 0                                                                                                                                                                                                                | 0                                                                                                                                                                                                        | 0                     | 0                                                                                                                                                                      | 0  | 0   | 0  | 0   | 0  | 0   | 0 | 0 | 0 | 0 | 0   | 0   | 0 | 0 | 0 | 0 | 0 | 0 | 12  | 0   | 0 | 3 | 0 |
| 61                                           | 0                                                                                                                                            | 0                                                                                                                                                                                                                | 0                                                                                                                                                                                                        | 0                     | 0                                                                                                                                                                      | 0  | 0   | 0  | 0   | 0  | 0   | 0 | 0 | 0 | 0 | 0   | 0   | 0 | 0 | 0 | 0 | 0 | 0 | 0   | 0   | 0 | 0 |   |
|                                              | 0                                                                                                                                            | 0                                                                                                                                                                                                                | 0                                                                                                                                                                                                        | 0                     | 0                                                                                                                                                                      | 0  | 0   | 0  | 0   | 0  | 0   | 0 | 0 | 0 | 0 | 0   | 0   | 0 | 0 | 0 | 0 | 0 | 0 | 0   | 0   | 0 | 0 |   |
|                                              | 0                                                                                                                                            | 0                                                                                                                                                                                                                | 0                                                                                                                                                                                                        | 0                     | 0                                                                                                                                                                      | 0  | 0   | 0  | 0   | 0  | 0   | 0 | 0 | 0 | 0 | 139 | 0   | 0 | 0 | 0 | 0 | 0 | 0 | 0   | 0   | 0 | 0 |   |
| M02255_77_000000000-ADUT3_1_1115_11278_14352 | T---AC--GG-AG-GGG-----GCT-A-G-----C--G-T--T--GT-T-CGG-AA-----TT-A-C-T-GG-GC-----GT--A----AA-GC-GC-AC-----G-TA-G-G-C-G-----G--C-TT-T-G-T----- | -----AA---G-T-T-A-----G-A-G--G--TG--A-AA-GC--C-T-GG-A-G----CT-T-AA-----C-T-C-C-A-G-A-A-T---T-G-C-C--T-T-----T-AA-G-A--C-----T-G-C-AT--C-G-C---T-T-G-A-A-T-C---C-GA---GA-G-A-----G-G-T-G--AG-T-----GG--A-ATT---C- | C-G-A-GT--GT-A-G-AG-GT--G---A-A-A---TT-C-GT-AG--AT-A-TT--C-G--G-A-A-G-A-AC-A-CC--AG--T-G-GC-GAA-G-G-C-G-----G--C-T-C-A---CTG-G--CT-C-G-----G-T---A-T-T-GA--CG-C-T-G--A-GG--T-G-CG-A-AA-G-C--G-TG--GG-G-- | -AG-C-A-AA-----CA--GG | Bacteria(100);Proteobacteria(100);Alphaproteobacteria(100);Sphingomonadales(100);unclassified(95);unclassified(95);unclassified(95);unclassified(95);unclassified(95); |    |     |    |     |    |     |   |   |   |   |     |     |   |   |   |   |   |   |     |     |   |   |   |
| Otu0648                                      | 0                                                                                                                                            | 0                                                                                                                                                                                                                | 0                                                                                                                                                                                                        | 0                     | 0                                                                                                                                                                      | 0  | 0   | 0  | 0   | 0  | 0   | 3 | 0 | 0 | 0 | 0   | 0   | 0 | 0 | 8 | 0 | 0 | 0 | 0   | 0   | 0 | 2 |   |
|                                              | 0                                                                                                                                            | 0                                                                                                                                                                                                                | 0                                                                                                                                                                                                        | 0                     | 0                                                                                                                                                                      | 0  | 0   | 0  | 0   | 0  | 0   | 0 | 0 | 0 | 0 | 0   | 0   | 0 | 0 | 0 | 0 | 0 | 0 | 0   | 0   | 0 | 0 |   |
|                                              | 0                                                                                                                                            | 0                                                                                                                                                                                                                | 16                                                                                                                                                                                                       | 0                     | 0                                                                                                                                                                      | 0  | 46  | 0  | 0   | 0  | 0   | 0 | 0 | 0 | 0 | 0   | 0   | 0 | 0 | 0 | 0 | 0 | 0 | 13  | 0   | 0 | 0 |   |
|                                              | 0                                                                                                                                            | 0                                                                                                                                                                                                                | 0                                                                                                                                                                                                        | 0                     | 0                                                                                                                                                                      | 0  | 0   | 0  | 6   | 0  | 0   | 0 | 0 | 0 | 0 | 0   | 0   | 0 | 0 | 0 | 0 | 0 | 0 | 0   | 0   | 0 | 0 |   |
| M02255_77_000000000-ADUT3_1_2115_19867_16474 | T---AC--GT                                                                                                                                   |                                                                                                                                                                                                                  |                                                                                                                                                                                                          |                       |                                                                                                                                                                        |    |     |    |     |    |     |   |   |   |   |     |     |   |   |   |   |   |   |     |     |   |   |   |



|                                                                                                                                                                                                                                                                                                                                                                                                                                                                                                                                                                                                                                                                                                                                                                                                           |   |   |    |   |   |    |   |   |    |   |   |   |   |    |   |     |   |   |   |   |   |   |   |   |   |   |   |   |
|-----------------------------------------------------------------------------------------------------------------------------------------------------------------------------------------------------------------------------------------------------------------------------------------------------------------------------------------------------------------------------------------------------------------------------------------------------------------------------------------------------------------------------------------------------------------------------------------------------------------------------------------------------------------------------------------------------------------------------------------------------------------------------------------------------------|---|---|----|---|---|----|---|---|----|---|---|---|---|----|---|-----|---|---|---|---|---|---|---|---|---|---|---|---|
| Otu0650                                                                                                                                                                                                                                                                                                                                                                                                                                                                                                                                                                                                                                                                                                                                                                                                   | 0 | 0 | 0  | 0 | 0 | 0  | 0 | 0 | 0  | 0 | 0 | 0 | 0 | 0  | 7 | 0   | 0 | 0 | 0 | 0 | 0 | 0 | 0 | 0 | 0 | 0 | 3 | 6 |
| 11                                                                                                                                                                                                                                                                                                                                                                                                                                                                                                                                                                                                                                                                                                                                                                                                        | 0 | 0 | 0  | 0 | 0 | 0  | 0 | 0 | 0  | 0 | 0 | 0 | 0 | 0  | 0 | 0   | 0 | 0 | 0 | 0 | 0 | 0 | 0 | 0 | 0 | 0 | 0 |   |
| 0                                                                                                                                                                                                                                                                                                                                                                                                                                                                                                                                                                                                                                                                                                                                                                                                         | 0 | 0 | 0  | 0 | 0 | 0  | 0 | 0 | 0  | 0 | 0 | 0 | 0 | 0  | 0 | 14  | 0 | 0 | 0 | 0 | 0 | 0 | 0 | 0 | 0 | 0 | 0 |   |
| 0                                                                                                                                                                                                                                                                                                                                                                                                                                                                                                                                                                                                                                                                                                                                                                                                         | 0 | 0 | 0  | 0 | 0 | 0  | 0 | 0 | 0  | 0 | 0 | 0 | 0 | 0  | 0 | 0   | 0 | 0 | 0 | 0 | 0 | 0 | 0 | 0 | 0 | 0 | 0 |   |
| M02255_77_000000000-ADUT3_1_2105_10814_8506 T---AC---GA-GG-GAT-----CCT-A-G-----C-G-T---T-GT-T-CGG-AA-----TC-A-T-T-GG-GC-----GT-A---AA-GG-GT-GT-----G-TA-G-G-C-G-----G-C-CT-T-G-T-----AA-<br>---G-T-C-A-----G-T-T-G-TG-A-AA-GC-C-C-CG-G-G-----CT-C-AA-----C-C-C-G-G-G-A-A-G---T-G-C-T---T-C-----T-GA-T-A--C-----T-G-C-TT-G-G-C---T-T-G-A-G-T-A--T-TG---GA-T-A-----G-G-G-G--AG-T-----GG-A-ATT---C-C-A-G-<br>GT--GT-A-G-TG-GT--G---A-A-A---TA-C-GT-AG--AT-A-TC--T-G-G-A-G-G-A-AC-A-CC--GG--C-G--GC-GAA-G-G-C-G-----G-C-T-C-A---CTG-G-CC-A-T-----A-T---A-C-T-GA--CG-C-T-G-A-AA-C-A-CG-A-AA-G-C--G-TG--GG-T--AG-C-<br>A-AA-----CA--GG Bacteria(100);unclassified(100);unclassified(100);unclassified(100);unclassified(100);unclassified(100);unclassified(100);unclassified(100);unclassified(100);           |   |   |    |   |   |    |   |   |    |   |   |   |   |    |   |     |   |   |   |   |   |   |   |   |   |   |   |   |
| Otu0651                                                                                                                                                                                                                                                                                                                                                                                                                                                                                                                                                                                                                                                                                                                                                                                                   | 0 | 0 | 0  | 0 | 0 | 0  | 0 | 0 | 0  | 0 | 0 | 0 | 0 | 0  | 0 | 0   | 0 | 0 | 0 | 0 | 0 | 0 | 0 | 0 | 0 | 0 | 0 |   |
| 0                                                                                                                                                                                                                                                                                                                                                                                                                                                                                                                                                                                                                                                                                                                                                                                                         | 0 | 0 | 0  | 0 | 0 | 0  | 0 | 0 | 0  | 0 | 0 | 0 | 0 | 55 | 0 | 0   | 0 | 0 | 0 | 0 | 0 | 0 | 0 | 0 | 0 | 0 | 0 |   |
| 0                                                                                                                                                                                                                                                                                                                                                                                                                                                                                                                                                                                                                                                                                                                                                                                                         | 0 | 0 | 0  | 0 | 0 | 0  | 0 | 0 | 0  | 0 | 0 | 0 | 0 | 0  | 0 | 0   | 0 | 0 | 0 | 0 | 0 | 0 | 0 | 0 | 0 | 0 | 0 |   |
| 0                                                                                                                                                                                                                                                                                                                                                                                                                                                                                                                                                                                                                                                                                                                                                                                                         | 0 | 0 | 34 | 0 | 0 | 0  | 0 | 0 | 0  | 0 | 0 | 0 | 0 | 0  | 0 | 0   | 0 | 0 | 0 | 0 | 0 | 0 | 0 | 0 | 0 | 0 | 0 |   |
| M02255_77_000000000-ADUT3_1_1104_17470_22577 T---AC---GA-GG-GGG-----GCA-A-G-----C-G-T---T-GT-T-CGG-AA-----TT-A-T-T-GG-GC-----GT-A---AA-GG-GT-GC-----G-TA-G-G-C-G-----G-T-TT-G-A-T---<br>-----AA---G-T-T-T-----G-A-T-G-TG-A-AA-TC--T-A-TG-G-G-----CT-C-AA-----C-C-C-A-T-A-G-T-C---T-G-C-A--T-C-----G-AA-A-A--C-----T-G-T-CG-G-G-C---T-T-G-A-G-T-A--T-GG---GA-G-A-----G-G-T-G--AG-T-----GG-A-ATT---T-<br>C-C-G-GT--GT-A-G-CG-GT--G---A-A-A---TG-C-GT-AG--AT-A-TC--G-G-A-A-G-G-A-AC-A-CC--TG-T-G--GC-GAA-A-G-C-G-----G-C-T-C-A---CTG-G-AC-C-A-----T-T---A-C-T-GA--CG-C-T-G-A-TG--C-A-CG-A-AA-G-C--T-AG--GG-G-<br>-AG-C-A-AA-----CA--GG Bacteria(100);Acidobacteria(100);Acidobacteria(100);Acidobacteriales(100);Acidobacteriaceae(100);Edaphobacter(62);unclassified(62);unclassified(62);unclassified(62); |   |   |    |   |   |    |   |   |    |   |   |   |   |    |   |     |   |   |   |   |   |   |   |   |   |   |   |   |
| Otu0652                                                                                                                                                                                                                                                                                                                                                                                                                                                                                                                                                                                                                                                                                                                                                                                                   | 0 | 0 | 0  | 0 | 0 | 0  | 0 | 0 | 0  | 0 | 0 | 0 | 0 | 0  | 0 | 0   | 0 | 0 | 0 | 0 | 6 | 0 | 0 | 0 | 0 | 0 | 0 |   |
| 0                                                                                                                                                                                                                                                                                                                                                                                                                                                                                                                                                                                                                                                                                                                                                                                                         | 1 | 1 | 0  | 0 | 0 | 0  | 0 | 0 | 16 | 0 | 0 | 0 | 0 | 0  | 0 | 0   | 0 | 0 | 0 | 0 | 0 | 0 | 0 | 0 | 0 | 0 | 0 |   |
| 0                                                                                                                                                                                                                                                                                                                                                                                                                                                                                                                                                                                                                                                                                                                                                                                                         | 0 | 0 | 0  | 0 | 0 | 0  | 0 | 0 | 0  | 0 | 0 | 0 | 0 | 0  | 0 | 0   | 0 | 0 | 0 | 0 | 0 | 0 | 0 | 0 | 0 | 0 | 0 |   |
| 0                                                                                                                                                                                                                                                                                                                                                                                                                                                                                                                                                                                                                                                                                                                                                                                                         | 0 | 0 | 0  | 0 | 0 | 0  | 0 | 0 | 0  | 0 | 0 | 0 | 0 | 0  | 0 | 0   | 0 | 0 | 0 | 0 | 0 | 0 | 0 | 0 | 0 | 0 | 0 |   |
| M02255_77_000000000-ADUT3_1_2106_23184_12869 T---AC---GT-AG-GGG-----GCG-A-G-----C-G-T---T-AT-C-CGG-AT-----TT-A-C-T-GG-GC-----GT-A---AA-GC-GC-GC-----T-AA-G-G-C-G-----G--C-CG-G-C-T-----<br>-----AA---G-T-T-G-----G-T-G--G-TG-A-AA-TT--T-C-GG-G-G-----CT-C-AA-----C-C-C-C-G-A-A-A-C---T-G-C-C--T-C-----C-AA-T-A--C-----T-G-G-TC-G-G-C---T-C-G-A-G-T-G--C-GG---GA-G-A-----G-G-A-A--GG-T-----GG-A-ATT---<br>C-C-C-G-GT--GT-A-G-TA-GT--G---A-A-A---TG-C-GT-AG--AT-A-TC--G-G-G-A-G-G-A-AC-A-CC--AG--T-G--GC-GAA-G-G-C-G-----G-C-C-T-T---CTG-G-CC-C-G-----C-A--A-C-T-GA--CG-C-T-G-T-AG--C-G-CG-A-AA-G-C--G-TG--GG-G-<br>G--AG-C-G-AA-----CG--GG Bacteria(100);unclassified(100);unclassified(100);unclassified(100);unclassified(100);unclassified(100);unclassified(100);unclassified(100);unclassified(100);  |   |   |    |   |   |    |   |   |    |   |   |   |   |    |   |     |   |   |   |   |   |   |   |   |   |   |   |   |
| Otu0653                                                                                                                                                                                                                                                                                                                                                                                                                                                                                                                                                                                                                                                                                                                                                                                                   | 0 | 0 | 0  | 0 | 0 | 0  | 0 | 0 | 0  | 0 | 0 | 0 | 0 | 0  | 0 | 0   | 0 | 0 | 0 | 0 | 0 | 0 | 0 | 0 | 0 | 0 | 0 |   |
| 0                                                                                                                                                                                                                                                                                                                                                                                                                                                                                                                                                                                                                                                                                                                                                                                                         | 0 | 0 | 0  | 0 | 0 | 90 | 0 | 0 | 0  | 0 | 0 | 0 | 0 | 0  | 0 | 0   | 0 | 0 | 0 | 0 | 0 | 0 | 0 | 0 | 0 | 0 | 0 |   |
| 0                                                                                                                                                                                                                                                                                                                                                                                                                                                                                                                                                                                                                                                                                                                                                                                                         | 0 | 0 | 0  | 0 | 0 | 0  | 0 | 0 | 0  | 0 | 0 | 0 | 0 | 0  | 0 | 0   | 0 | 0 | 0 | 0 | 0 | 0 | 0 | 0 | 0 | 0 | 0 |   |
| 0                                                                                                                                                                                                                                                                                                                                                                                                                                                                                                                                                                                                                                                                                                                                                                                                         | 0 | 0 | 2  | 0 | 0 | 0  | 0 | 0 | 0  | 0 | 0 | 0 | 0 | 0  | 0 | 130 | 0 | 0 | 0 | 0 | 0 | 0 | 0 | 0 | 0 | 0 | 0 |   |
| M02255_77_000000000-ADUT3_1_1106_7690_8296 T---AC---GT-AG-GTG-----GCA-A-G-----C-G-T---T-GT-C-CGG-AT-----TT-A-C-T-GG-GC-----GT-A---AA-GG-AT-GC-----G-TA-G-G-C-G-----G--A-CA                                                                                                                                                                                                                                                                                                                                                                                                                                                                                                                                                                                                                                |   |   |    |   |   |    |   |   |    |   |   |   |   |    |   |     |   |   |   |   |   |   |   |   |   |   |   |   |



[illegible]



|         |                                              |       |         |                                                                                                                                        |                                                                                                                                                                  |                                                                                                                                                                                                                                                                               |                                                                                                                                                                                 |   |   |    |   |   |   |   |    |     |   |   |   |    |   |    |    |   |   |   |   |
|---------|----------------------------------------------|-------|---------|----------------------------------------------------------------------------------------------------------------------------------------|------------------------------------------------------------------------------------------------------------------------------------------------------------------|-------------------------------------------------------------------------------------------------------------------------------------------------------------------------------------------------------------------------------------------------------------------------------|---------------------------------------------------------------------------------------------------------------------------------------------------------------------------------|---|---|----|---|---|---|---|----|-----|---|---|---|----|---|----|----|---|---|---|---|
| Otu0660 | 0                                            | 0     | 0       | 0                                                                                                                                      | 0                                                                                                                                                                | 0                                                                                                                                                                                                                                                                             | 0                                                                                                                                                                               | 0 | 0 | 0  | 0 | 0 | 0 | 0 | 0  | 0   | 0 | 0 | 0 | 0  | 0 | 0  | 0  | 0 | 0 | 0 |   |
|         | 0                                            | 0     | 0       | 0                                                                                                                                      | 0                                                                                                                                                                | 0                                                                                                                                                                                                                                                                             | 0                                                                                                                                                                               | 0 | 0 | 0  | 0 | 0 | 0 | 0 | 0  | 0   | 0 | 0 | 0 | 0  | 0 | 0  | 0  | 0 | 0 | 0 |   |
|         | 0                                            | 0     | 0       | 0                                                                                                                                      | 0                                                                                                                                                                | 0                                                                                                                                                                                                                                                                             | 0                                                                                                                                                                               | 0 | 0 | 0  | 0 | 0 | 0 | 0 | 0  | 0   | 0 | 0 | 0 | 0  | 0 | 0  | 0  | 0 | 0 | 0 |   |
|         | 0                                            | 132   | 0       | 0                                                                                                                                      | 0                                                                                                                                                                | 0                                                                                                                                                                                                                                                                             | 0                                                                                                                                                                               | 0 | 0 | 0  | 0 | 0 | 0 | 0 | 0  | 0   | 0 | 0 | 0 | 0  | 0 | 0  | 0  | 0 | 0 | 0 |   |
|         | M02255_77_000000000-ADUT3_1_2112_17732_15896 | T---- | AC--GG- | AG-GGG-----GCT-A-G-----C-G-T---T-AT-T-CGG-AA-----TT-A--C-T-GG-GC-----GT--A----AA-GC-GC-AC-----G-TA-G-G-C-G-----G--A-CC-A-G-A-----AA--- | G-T-T-A-----G-G-G--G-TG--A-AA-TC--C-C-GG-G-G----CT-C-AA-----C-C-T-C-G-G-A-A-C---T-G--C-C---T-C-----T-AA-A-A--C-----G--C-C-TG--G-T-C---T-T-G-A-G-G--T--C-GA----   | GA-G-A-----G-G-T-G---AG-T-----GG-A--ATT---C-C-G-A-GT--GT-A-G-AG-GT--G---A-A-A---TT-C-GT-AG--AT-A-TT--C-G--G-A-G-G-A-AC-A-CC--AG--T--G--GC-GAA-G--G-C-G-----G--C-T-C-A---CTG--G--CT-C-G-----A-T---A-C-T-GA--CG-C-T-G--A-GG--T-G-CG-A-AA-G-C---G-TG--GG-G--AG-C-A-AA-----CA--GG | Bacteria(100);Proteobacteria(100);Alphaproteobacteria(100);unclassified(100);unclassified(100);unclassified(100);unclassified(100);unclassified(100);                           |   |   |    |   |   |   |   |    |     |   |   |   |    |   |    |    |   |   |   |   |
| Otu0661 | 0                                            | 117   | 0       | 0                                                                                                                                      | 0                                                                                                                                                                | 0                                                                                                                                                                                                                                                                             | 0                                                                                                                                                                               | 0 | 0 | 0  | 0 | 0 | 0 | 0 | 0  | 0   | 0 | 0 | 0 | 16 | 0 | 0  | 0  | 0 | 1 | 0 | 0 |
|         | 0                                            | 0     | 0       | 0                                                                                                                                      | 0                                                                                                                                                                | 0                                                                                                                                                                                                                                                                             | 77                                                                                                                                                                              | 0 | 0 | 0  | 0 | 0 | 0 | 0 | 0  | 0   | 0 | 0 | 0 | 0  | 0 | 0  | 16 | 0 | 0 | 0 | 0 |
|         | 0                                            | 0     | 0       | 0                                                                                                                                      | 0                                                                                                                                                                | 0                                                                                                                                                                                                                                                                             | 0                                                                                                                                                                               | 0 | 0 | 0  | 0 | 0 | 0 | 0 | 0  | 0   | 0 | 0 | 0 | 0  | 0 | 0  | 0  | 0 | 0 | 0 | 0 |
|         | 0                                            | 0     | 0       | 0                                                                                                                                      | 0                                                                                                                                                                | 0                                                                                                                                                                                                                                                                             | 2                                                                                                                                                                               | 0 | 0 | 0  | 0 | 0 | 0 | 0 | 54 | 148 | 0 | 0 | 0 | 0  | 0 | 17 | 0  | 0 | 0 | 0 | 0 |
|         | M02255_77_000000000-ADUT3_1_1105_11619_18899 | T---- | AC--GA- | AG-GGG-----GCT-A-G-----C-G-T---T-GC-T-CGG-AA-----TG-A--C-T-GG-GC-----GT--A----AA-GG-GC-GC-----G-TA-G-G-C-G-----G--T-AT-G-G-A-----CA--- | G-T-C-A-----G-G-T--G-TG--A-AA-TT--C-C-CG-G-G----CT-T-AA-----C-C-T-G-G-G-G-A-C---T-G--C-A---T-T-----T-GA-T-A--C-----G--T-T-CA-A-A-C---T-A-G-A-G-T--G---T-GG----   | AA-G-A-----G-G-G-T---CG-T-----GG-A--ATT---C-C-C-A-GT--GT-A-G-AG-GT--G---A-A-A---TT-C-GT-AG--AT-A-TT--G-G--G-A-A-G-A-AC-A-CC--GG--T--G--GC-GAA-G--G-C-G-----G--C-G-A-C---CTG--G--TC-C-A-----T-T---A-C-T-GA--CG-C-T-G--A-GG--C-G-CG-A-AA-G-C---G-TG--GG-G--AG-C-A-AA-----CA--GG | Bacteria(100);Proteobacteria(100);Alphaproteobacteria(100);Rhodospirillales(100);Acetobacteraceae(100);unclassified(100);unclassified(100);unclassified(100);unclassified(100); |   |   |    |   |   |   |   |    |     |   |   |   |    |   |    |    |   |   |   |   |
| Otu0662 | 0                                            | 0     | 0       | 0                                                                                                                                      | 0                                                                                                                                                                | 0                                                                                                                                                                                                                                                                             | 15                                                                                                                                                                              | 0 | 0 | 0  | 0 | 0 | 1 | 0 | 0  | 0   | 0 | 0 | 0 | 3  | 5 | 0  | 0  | 0 | 0 | 0 | 0 |
|         | 0                                            | 0     | 48      | 0                                                                                                                                      | 0                                                                                                                                                                | 0                                                                                                                                                                                                                                                                             | 0                                                                                                                                                                               | 0 | 7 | 14 | 0 | 0 | 0 | 8 | 0  | 0   | 0 | 0 | 0 | 0  | 0 | 18 | 6  | 0 | 0 | 0 | 0 |
|         | 0                                            | 0     | 0       | 0                                                                                                                                      | 0                                                                                                                                                                | 0                                                                                                                                                                                                                                                                             | 0                                                                                                                                                                               | 0 | 0 | 0  | 0 | 0 | 0 | 0 | 0  | 0   | 0 | 0 | 0 | 0  | 0 | 70 | 0  | 0 | 0 | 0 | 0 |
|         | 0                                            | 80    | 0       | 0                                                                                                                                      | 0                                                                                                                                                                | 30                                                                                                                                                                                                                                                                            | 1                                                                                                                                                                               | 0 | 0 | 7  | 0 | 0 | 2 | 0 | 0  | 0   | 0 | 0 | 0 | 0  | 0 | 0  | 0  | 0 | 0 | 0 | 0 |
|         | M02255_77_000000000-ADUT3_1_2117_22324_16347 | T---- | AC--GT- | AG-GGC-----GCA-A-G-----C-G-T---T-GT-C-CGG-AA-----TT-A--T-T-GG-GC-----GT--A----AA-GA-GC-TC-----G-TA-G-G-C-G-----G--T-TT-G-T-C-----GC--- | G-T-C-T-----G-C-T--G-TG--A-AA-TC--C-C-GA-G-G----CT-C-AA-----C-C-T-C-G-G-G--C-T---T-G--C-A---G-T-----G--GG-T-A--C-----G--G-G-CA-G-A-C---T-A-G-A-G-T--G---C-GG---- | TA-G-G-----G-G-A-G---AC-T-----GG-A--ACT---C-T-G-GT--GT-A-G-CG-GT--G---G--A-A---TG-C-GC-AG--AT-A-TC--A-G--G-A-A-G-A-AC-A-CC--GA--T--G--GC-GAA-G--G-C-A-----G--G-T-C-T---CTG--G--GC-C-G-----T-A---A-C-T-GA--CG-C-T-G--A-GG--A-G-CG-A-AA-G-C---A-TG--GG-G--AG-C-G-AA-----CA--GG  | Bacteria(100);Actinobacteria(100);Actinobacteria(100);Actinobacteridae(100);Actinomycetales(100);Micrococcineae(100);Microbacteriaceae(89);unclassified(89);unclassified(89);   |   |   |    |   |   |   |   |    |     |   |   |   |    |   |    |    |   |   |   |   |
| Otu0663 | 0                                            | 0     | 0       | 0                                                                                                                                      | 0                                                                                                                                                                | 0                                                                                                                                                                                                                                                                             | 0                                                                                                                                                                               | 0 | 0 | 0  | 0 | 0 | 0 | 0 | 0  | 0   | 0 | 0 | 0 | 0  | 0 | 0  | 0  | 0 | 0 | 0 | 0 |
|         | 0                                            | 0     | 0       | 0                                                                                                                                      | 0                                                                                                                                                                | 0                                                                                                                                                                                                                                                                             | 0                                                                                                                                                                               | 0 | 0 | 0  | 0 | 0 | 0 | 0 | 0  | 0   | 0 | 0 | 0 | 0  | 0 | 0  | 0  | 0 | 0 | 0 | 0 |
|         | 0                                            | 0     | 0       | 0                                                                                                                                      | 0                                                                                                                                                                | 0                                                                                                                                                                                                                                                                             | 0                                                                                                                                                                               | 0 | 0 | 0  | 0 | 0 | 0 | 0 | 0  | 0   | 0 | 0 | 0 | 0  | 0 | 0  | 0  | 0 | 0 | 0 | 0 |
|         | 0                                            | 0     | 0       | 0                                                                                                                                      | 0                                                                                                                                                                | 37                                                                                                                                                                                                                                                                            | 0                                                                                                                                                                               | 0 | 0 | 0  | 0 | 0 | 0 | 0 | 0  | 0   | 0 | 0 | 0 | 0  | 0 | 0  | 0  | 0 | 0 | 0 | 0 |
|         | M02255_77_000000000-ADUT3_1_1105_22468_9812  | T---- |         |                                                                                                                                        |                                                                                                                                                                  |                                                                                                                                                                                                                                                                               |                                                                                                                                                                                 |   |   |    |   |   |   |   |    |     |   |   |   |    |   |    |    |   |   |   |   |



|                                                                                                                                                                                                                             |   |    |    |     |   |   |    |   |   |   |    |   |    |    |    |     |    |    |   |     |     |   |    |    |   |    |   |    |   |
|-----------------------------------------------------------------------------------------------------------------------------------------------------------------------------------------------------------------------------|---|----|----|-----|---|---|----|---|---|---|----|---|----|----|----|-----|----|----|---|-----|-----|---|----|----|---|----|---|----|---|
| Otu0665                                                                                                                                                                                                                     | 0 | 0  | 0  | 0   | 0 | 0 | 0  | 0 | 0 | 0 | 0  | 0 | 0  | 0  | 14 | 0   | 0  | 0  | 0 | 0   | 0   | 0 | 0  | 15 | 0 | 0  | 0 | 0  | 0 |
| 7                                                                                                                                                                                                                           | 0 | 0  | 0  | 0   | 0 | 0 | 0  | 0 | 0 | 0 | 0  | 0 | 0  | 0  | 0  | 0   | 0  | 0  | 0 | 0   | 0   | 0 | 0  | 0  | 0 | 0  | 0 | 0  | 0 |
| 0                                                                                                                                                                                                                           | 0 | 0  | 0  | 0   | 0 | 0 | 0  | 0 | 0 | 0 | 0  | 0 | 0  | 0  | 0  | 0   | 0  | 0  | 0 | 0   | 0   | 0 | 0  | 0  | 0 | 0  | 0 | 0  | 0 |
| 0                                                                                                                                                                                                                           | 0 | 0  | 0  | 21  | 0 | 0 | 0  | 0 | 0 | 0 | 0  | 0 | 0  | 0  | 0  | 0   | 0  | 0  | 0 | 0   | 0   | 0 | 0  | 0  | 0 | 0  | 0 | 0  | 0 |
| M02255_77_000000000-ADUT3_1_1111_7146_13032 T---AC---GA-AG-GGG-----GCT-A-G-----C-G-T---T-GT-T-CGG-AA-----TT-A--C-T--GG-GC-----GT--A----AA-GG-GC-GC-----G-TA-G-G-C-G-----G--C-CT-G-T-T-----                                  |   |    |    |     |   |   |    |   |   |   |    |   |    |    |    |     |    |    |   |     |     |   |    |    |   |    |   |    |   |
| AA---G-T-T-G-----G-A-A-G--TG--A-AA-GC--C-C-CG-G-G-----CT-C-AA-----C-C-T-G-G-G-A-A-T---T-G-C-T---T-T-----C-GA-T-A--C-----T-G-G-CA--G-G-C---T-T-G-A-G-T--T---C-CG-----GA-G-A-----G-G-A-T---GG-T-----GG--A--ATT---C-C-C-       |   |    |    |     |   |   |    |   |   |   |    |   |    |    |    |     |    |    |   |     |     |   |    |    |   |    |   |    |   |
| A-GT--GT-A-G-AG-GT--G---A-A-A---TT-C-GT-AG--AT-A-TT--G-G--G-A-A-G-A-AC-A-CC---GG--T--G--GC-GAA-G--G-C-G-----G--C-C-A-T---CTG--G--AC-G-G-----A-C--A-C-T--GA--CG-C-T-G--A-GG--C-G-CG-A--AA-G-C---G-TG--GG-G--                 |   |    |    |     |   |   |    |   |   |   |    |   |    |    |    |     |    |    |   |     |     |   |    |    |   |    |   |    |   |
| AG-C-A-AA-----CA--GG Bacteria(100);Proteobacteria(100);Alphaproteobacteria(100);Rhodospirillales(100);Rhodospirillaceae(100);Azospirillum(100);unclassified(100);unclassified(100);unclassified(100);                       |   |    |    |     |   |   |    |   |   |   |    |   |    |    |    |     |    |    |   |     |     |   |    |    |   |    |   |    |   |
| Otu0666                                                                                                                                                                                                                     | 0 | 52 | 0  | 144 | 1 | 0 | 0  | 0 | 0 | 0 | 0  | 0 | 0  | 0  | 0  | 0   | 0  | 0  | 0 | 2   | 0   | 0 | 0  | 0  | 0 | 0  | 1 | 0  | 0 |
| 0                                                                                                                                                                                                                           | 0 | 0  | 0  | 0   | 0 | 0 | 0  | 1 | 0 | 0 | 0  | 0 | 3  | 0  | 0  | 0   | 0  | 0  | 1 | 0   | 0   | 0 | 3  | 6  | 2 | 0  | 0 | 0  | 0 |
| 6                                                                                                                                                                                                                           | 0 | 0  | 0  | 0   | 0 | 0 | 0  | 0 | 0 | 0 | 0  | 2 | 0  | 1  | 50 | 10  | 0  | 0  | 0 | 0   | 0   | 1 | 0  | 0  | 0 | 0  | 0 | 0  | 0 |
| 0                                                                                                                                                                                                                           | 0 | 5  | 0  | 41  | 0 | 0 | 0  | 0 | 0 | 0 | 0  | 3 | 0  | 0  | 2  | 0   | 0  | 18 | 0 | 0   | 0   | 0 | 0  | 0  | 0 | 21 | 0 | 0  | 0 |
| M02255_76_000000000-ADUNE_1_1112_6284_9083 C---A---GC-A-GCC-----GCG-G-T-----A-A-T---A-CG-T-AGG-GC-----GC-A-A-G--CG-TT-----AT-C---CG-GA-AT-TA-----T-TG-G-G-C-G-----G-T-TT-G-T-C-----GC---                                    |   |    |    |     |   |   |    |   |   |   |    |   |    |    |    |     |    |    |   |     |     |   |    |    |   |    |   |    |   |
| -G-T-C-T-----G-C-C-G--TG--A-AA-GT--C-C-GG-G-G-----CT-T-AA-----C-G-C-C-G-G-A-T-C---T-G-C-G--G-T-----G--GG-T-A--C-----G-G-G-CA--G-A-C---T-A-G-A-G-T--G---C-AG-----TA-G-G-----G-G-A-G---AC-T-----GG--A--ATT---C-C-T-G-         |   |    |    |     |   |   |    |   |   |   |    |   |    |    |    |     |    |    |   |     |     |   |    |    |   |    |   |    |   |
| GT--GT-A-G-CG-GT--G---A-A-A---TG-C-GC-AG--AT-A-TC--A-G--G-A-G-G-A-AC-A-CC---GA-T--G--GC-GAA-G--G-C-A-----G-G-T-C-T---CTG--G--GC-T-G-----T-A--A-C-T--GA--CG-C-T-G--A-GG--A-G-CG-A--AA-G-C---A-TG--GG-G--AG-                  |   |    |    |     |   |   |    |   |   |   |    |   |    |    |    |     |    |    |   |     |     |   |    |    |   |    |   |    |   |
| C-G-AA-----CA--GG Bacteria(100);Actinobacteria(100);Actinobacteria(100);Actinobacteridae(100);Actinomycetales(100);Micrococcineae(100);Micrococcaceae(100);unclassified(100);unclassified(100);                             |   |    |    |     |   |   |    |   |   |   |    |   |    |    |    |     |    |    |   |     |     |   |    |    |   |    |   |    |   |
| Otu0667                                                                                                                                                                                                                     | 0 | 0  | 0  | 0   | 0 | 0 | 0  | 0 | 0 | 0 | 0  | 0 | 0  | 0  | 9  | 0   | 0  | 0  | 0 | 0   | 0   | 0 | 36 | 0  | 0 | 0  | 6 | 11 |   |
| 0                                                                                                                                                                                                                           | 0 | 0  | 0  | 0   | 0 | 0 | 0  | 0 | 0 | 0 | 0  | 0 | 54 | 39 | 0  | 0   | 0  | 0  | 0 | 0   | 0   | 0 | 0  | 0  | 0 | 0  | 0 | 0  |   |
| 0                                                                                                                                                                                                                           | 0 | 0  | 0  | 0   | 0 | 0 | 0  | 0 | 0 | 0 | 0  | 0 | 0  | 0  | 0  | 0   | 65 | 0  | 0 | 0   | 0   | 0 | 0  | 0  | 0 | 0  | 0 | 0  |   |
| 0                                                                                                                                                                                                                           | 1 | 0  | 0  | 0   | 0 | 0 | 0  | 0 | 0 | 0 | 0  | 0 | 0  | 0  | 8  | 165 | 0  | 52 | 0 | 102 | 121 | 0 | 0  | 0  | 0 | 0  | 0 | 0  |   |
| M02255_77_000000000-ADUT3_1_1102_17940_16164 T---AC---GA-AG-GGG-----GCT-A-G-----C-G-T---T--GT-T-CGG-AA-----TC-A--C-T--GG-GC-----GT--A----AA-GC-GC-AC-----G-TA-G-G-C-G-----G--A-CT-T-T-T-----                                |   |    |    |     |   |   |    |   |   |   |    |   |    |    |    |     |    |    |   |     |     |   |    |    |   |    |   |    |   |
| -----AA---G-T-C-G-----G-A-G--G--TG--A-AA-TC--C-C-AA-G-G-----CT-C-AA-----C-C-T-T-G-G-A-A-C---T-G--C-C---C-C-----C-GA-T-A--C-----T-G-G-GA--G-T-C---T-T-G-A-G-T--A---T-GG-----TA-G-A-----G-G-T-T---AG-T-----GG--A--ACT---G-    |   |    |    |     |   |   |    |   |   |   |    |   |    |    |    |     |    |    |   |     |     |   |    |    |   |    |   |    |   |
| C-G-A-GT--GT-A-G-AG-GT--G---A-A-A---TT-C-GT-AG--AT-A-TT--C-G--C-A-A-G-A-AC-A-CC---AG--T--G--GC-GAA-G--G-C-G-----G--C-T-A-A---CTG--G--AC-C-A-----T-T--A-C-T--GA--CG-C-T-G--A-GG--T-G-CG-A--AA-G-C---G-TG--GG-G--             |   |    |    |     |   |   |    |   |   |   |    |   |    |    |    |     |    |    |   |     |     |   |    |    |   |    |   |    |   |
| -AG-C-A-AA-----CA--GG Bacteria(100);Proteobacteria(100);Alphaproteobacteria(100);Rhizobiales(100);unclassified(100);unclassified(100);unclassified(100);unclassified(100);unclassified(100);                                |   |    |    |     |   |   |    |   |   |   |    |   |    |    |    |     |    |    |   |     |     |   |    |    |   |    |   |    |   |
| Otu0668                                                                                                                                                                                                                     | 0 | 0  | 0  | 0   | 0 | 0 | 0  | 0 | 0 | 0 | 0  | 0 | 0  | 0  | 0  | 0   | 0  | 0  | 0 | 0   | 0   | 0 | 0  | 0  | 0 | 0  | 0 | 3  |   |
| 2                                                                                                                                                                                                                           | 0 | 0  | 0  | 0   | 0 | 0 | 0  | 0 | 0 | 0 | 0  | 0 | 0  | 0  | 0  | 0   | 0  | 0  | 0 | 0   | 0   | 0 | 0  | 0  | 0 | 0  | 0 | 0  |   |
| 0                                                                                                                                                                                                                           | 0 | 0  | 0  | 0   | 0 | 0 | 17 | 0 | 0 | 0 | 0  | 0 | 0  | 0  | 0  | 0   | 0  | 0  | 0 | 0   | 0   | 0 | 0  | 0  | 0 | 0  | 0 | 0  |   |
| 0                                                                                                                                                                                                                           | 0 | 0  | 45 | 0   | 5 | 0 | 0  | 0 | 0 | 0 | 17 | 0 | 0  | 0  | 0  | 0   | 0  | 0  | 0 | 0   | 0   | 0 | 0  | 0  | 0 | 0  | 0 | 0  |   |
| M02255_77_000000000-ADUT3_1_1110_6026_19815 T---AC---GT-AG-GGG-----GCA-A-G-----C-G-T---T--AT-C-CGG-AT-----TT-A--C-T--GG-GT-----GT--A----AA-GG-GA-GC-----G-TA-G-A-C-G-----G--A-AG-A-G-C-----                                 |   |    |    |     |   |   |    |   |   |   |    |   |    |    |    |     |    |    |   |     |     |   |    |    |   |    |   |    |   |
| AA---G-T-C-T-----G-A-T--G--TG--A-AA-GG--C-T-GG-G-G-----CT-T-AA-----C-C-C-C-A-G-G--A-C---T-G--C-A---T-T-----G--GA-A-A--C-----T--G-T--TT--T-T-C---T-A-G-A-G-T--G---C-CG-----GA-G-A-----G-G-T-A---AG-C-----GG--A--ATT---C-C-T- |   |    |    |     |   |   |    |   |   |   |    |   |    |    |    |     |    |    |   |     |     |   |    |    |   |    |   |    |   |
| A-GT--GT-A-G-CG-GT--G---A-A-A---TG-C-GT-AG--AT-A-TT--A-G--G-A-G-G-A-AC-A-CC---AG--T--G--GC-GAA-G--G-C-G-----G--C-T-T-A---CTG--G--AC-G-G-----T-A--A-C-T--GA--CG-T-T-G--A-GG--C-T-CG-A--AA-G-C---G-TG--GG-G--                 |   |    |    |     |   |   |    |   |   |   |    |   |    |    |    |     |    |    |   |     |     |   |    |    |   |    |   |    |   |
| AG-C-A-AA-----CA--GG Bacteria(100);Firmicutes(100);Clostridia(100);Clostridiales(100);Lachnospiraceae(100);Blautia(100);unclassified(100);unclassified(100);unclassified(100);unclassified(100);unclassified(100);          |   |    |    |     |   |   |    |   |   |   |    |   |    |    |    |     |    |    |   |     |     |   |    |    |   |    |   |    |   |
| Otu0669                                                                                                                                                                                                                     | 0 | 0  | 0  | 0   | 0 | 0 | 0  | 0 | 0 | 0 | 0  | 0 | 0  | 0  | 0  | 0   | 0  | 0  | 0 | 0   | 0   | 0 | 0  | 0  | 0 | 0  | 0 | 21 |   |
| 0                                                                                                                                                                                                                           | 0 | 0  | 0  | 0   | 0 | 0 | 0  | 0 | 0 | 0 | 0  | 0 | 0  | 0  | 0  | 0   | 0  | 0  | 0 | 0   | 0   | 0 | 0  | 0  | 0 | 0  | 0 | 0  |   |
| 0                                                                                                                                                                                                                           | 0 | 0  | 0  | 0   | 0 | 0 | 0  | 0 | 0 | 0 | 0  | 0 | 0  | 0  | 0  | 0   | 0  | 0  | 0 | 0   | 0   | 0 | 0  | 0  | 0 | 0  | 0 | 0  |   |
| 0                                                                                                                                                                                                                           | 0 | 0  | 0  | 0   | 0 | 0 | 0  | 0 | 0 | 0 | 0  | 0 | 0  | 0  | 0  | 0   | 0  | 0  | 0 | 0   | 0   | 0 | 0  | 0  | 0 | 0  | 0 | 0  |   |
| M02255_77_000000000-ADUT3_1_1117_20207_24273 T---AC---GG-AG-GGG-----GCT-A-G-----C-G-T---T--GT-T-CGG-AA-----TT-A--C-T--GG-GC-----GT--A----AA-GC-GC-AC-----G-TA-G-G-C-G-----G--A-TG-C-T-C-----                                |   |    |    |     |   |   |    |   |   |   |    |   |    |    |    |     |    |    |   |     |     |   |    |    |   |    |   |    |   |
| -----AA---G-T-C-G-----G-G-G--G--TG--A-AA-TC--C-C-GG-G-G-----CT-C-AA-----C-C-C-C-G-G-A-A-C---T-G--C-C---T-C-----C-GA-T-A--C-----T--G-G--GT--G-T-C---T-G-G-A-G-G-A---T-GG-----GA-G-A-----G-G-C-G---AG-T-----GG--A--ATT---     |   |    |    |     |   |   |    |   |   |   |    |   |    |    |    |     |    |    |   |     |     |   |    |    |   |    |   |    |   |
| C-C-G-A-GT--GT-A-G-AG-GT--G---A-A-A---TT-C-GT-AG--AT-A-TT--C-G--G-A-G-G-A-AC-A-CC---AG--T--G--GC-GAA-G--G-C-G-----G--C-T-C-G---CTG--G--CC-C-A-----T-T--A-C-T--GA--CG-C-T-G--A-GG--T-G-CG-A--AA-G-C---G-TG--GG-G--           |   |    |    |     |   |   |    |   |   |   |    |   |    |    |    |     |    |    |   |     |     |   |    |    |   |    |   |    |   |
| G--AG-C-A-AA-----CA--GG Bacteria(100);Proteobacteria(100);Alphaproteobacteria(100);unclassified(100);unclassified(100);unclassified(100);unclassified(100);unclassified(100);unclassified(100);                             |   |    |    |     |   |   |    |   |   |   |    |   |    |    |    |     |    |    |   |     |     |   |    |    |   |    |   |    |   |



[illegible]



|                                                                                                                                                                                                                                                                                                                                                                                                                                                                                                                                                                                                                                                                                                                                                                                                                    |   |    |    |    |   |   |   |   |   |   |   |   |   |    |   |   |   |    |   |   |    |   |   |   |   |    |   |   |
|--------------------------------------------------------------------------------------------------------------------------------------------------------------------------------------------------------------------------------------------------------------------------------------------------------------------------------------------------------------------------------------------------------------------------------------------------------------------------------------------------------------------------------------------------------------------------------------------------------------------------------------------------------------------------------------------------------------------------------------------------------------------------------------------------------------------|---|----|----|----|---|---|---|---|---|---|---|---|---|----|---|---|---|----|---|---|----|---|---|---|---|----|---|---|
| Otu0675                                                                                                                                                                                                                                                                                                                                                                                                                                                                                                                                                                                                                                                                                                                                                                                                            | 0 | 95 | 17 | 31 | 0 | 0 | 0 | 6 | 0 | 0 | 0 | 0 | 0 | 0  | 0 | 0 | 0 | 0  | 0 | 0 | 0  | 0 | 0 | 0 | 0 | 0  | 0 |   |
|                                                                                                                                                                                                                                                                                                                                                                                                                                                                                                                                                                                                                                                                                                                                                                                                                    | 0 | 0  | 0  | 0  | 0 | 0 | 0 | 0 | 0 | 0 | 0 | 0 | 0 | 0  | 0 | 0 | 0 | 0  | 0 | 0 | 0  | 0 | 0 | 0 | 0 | 0  |   |   |
|                                                                                                                                                                                                                                                                                                                                                                                                                                                                                                                                                                                                                                                                                                                                                                                                                    | 0 | 0  | 0  | 0  | 0 | 0 | 0 | 0 | 0 | 0 | 0 | 0 | 0 | 0  | 0 | 0 | 0 | 0  | 0 | 0 | 0  | 0 | 0 | 0 | 0 | 37 |   |   |
|                                                                                                                                                                                                                                                                                                                                                                                                                                                                                                                                                                                                                                                                                                                                                                                                                    | 0 | 0  | 0  | 0  | 0 | 4 | 0 | 0 | 0 | 0 | 0 | 0 | 0 | 0  | 0 | 0 | 0 | 70 | 0 | 0 | 0  | 0 | 0 | 0 | 0 |    |   |   |
| M02255_77_000000000-ADUT3_1_1112_11715_11048 G---AC---GG-GG-GGG-----GCA-A-G-----T-G-T---T-CT-T-CGG-AA-----TG-A-C-T--GG-GC-----GT-A----AA-GG-GC-AC-----G-TA-G-G-C-G-----G-G-GA-A-T-C-----GG---G-T-T-T-----C-A-A-G--TT--C-AA-G---T-C-GC-C-A-----AA-A-AG-----A-G-G-C-G-G-A-A-----T-G--C-T---C-T-----C--GA-A-A--C-----C-A-A--TT--C-A-C---T-T-G-A-G-T-G--A-GA-----CA-G-A-----G-G-A-G--AG-T-----TT--C--ATT---T-C-G-T-GT--GT-A-G-GG-GT--G---A-A-A---TC-C-TC-AT--AT-C-TA--C-G--A-A-G-G-A-AG-G-CC--AA--A-T--GC-GAA-G--G-C-A-----G--C-T-C-T---CTG--G--GT-C-C-----C-T---A-C-C--GA--CG-C-T-G--G-GG--T-G-CG-A--AA-G-C--A-TG--GG-G--AG-C-G-AA-----CG--GG Bacteria(100);unclassified(100);unclassified(100);unclassified(100);unclassified(100);unclassified(100);unclassified(100);unclassified(100);unclassified(100);          |   |    |    |    |   |   |   |   |   |   |   |   |   |    |   |   |   |    |   |   |    |   |   |   |   |    |   |   |
| Otu0676                                                                                                                                                                                                                                                                                                                                                                                                                                                                                                                                                                                                                                                                                                                                                                                                            | 0 | 0  | 0  | 0  | 0 | 0 | 0 | 0 | 0 | 0 | 0 | 0 | 0 | 0  | 0 | 0 | 0 | 0  | 0 | 0 | 1  | 0 | 0 | 0 | 0 | 1  | 0 | 0 |
|                                                                                                                                                                                                                                                                                                                                                                                                                                                                                                                                                                                                                                                                                                                                                                                                                    | 0 | 0  | 0  | 0  | 0 | 1 | 0 | 0 | 5 | 1 | 0 | 0 | 0 | 6  | 0 | 0 | 8 | 0  | 0 | 0 | 22 | 1 | 0 | 6 | 0 | 0  | 0 | 2 |
|                                                                                                                                                                                                                                                                                                                                                                                                                                                                                                                                                                                                                                                                                                                                                                                                                    | 0 | 0  | 0  | 0  | 0 | 0 | 0 | 0 | 0 | 0 | 0 | 0 | 0 | 0  | 0 | 1 | 0 | 0  | 0 | 0 | 0  | 0 | 0 | 0 | 0 | 0  | 0 |   |
|                                                                                                                                                                                                                                                                                                                                                                                                                                                                                                                                                                                                                                                                                                                                                                                                                    | 0 | 0  | 0  | 0  | 0 | 0 | 0 | 0 | 0 | 0 | 0 | 0 | 0 | 0  | 0 | 0 | 0 | 0  | 0 | 0 | 0  | 0 | 0 | 0 | 0 | 0  | 0 |   |
| M02255_76_000000000-ADUNE_1_2106_15826_24272 T---AC---GG-AG-GGT-----GCA-A-G-----C--G-T---T-AC-C-CGG-AA-----TC-A-----C-----T-----GG-GC-----G-T-----A-CA-C-T-T-----AA---G-T-C-T-----G-G-T-T-TT--A-AA-GA--C-C-GG-G-G---CT-C-AA-----C-C-C-C-G-G-G--C-A---T-G--G-A--C-T-----G--GG-T-A--C-----T--G-G--GT--G-T-C---T-G-G-A-C-C-T---C-TG---GA-G-A-----G-A-G-A--AC-T---GG--A--ATT---C-C-T-G-GT--GT-A-G-CG-GT--G---G-A-A---TG-C-GT-AG--AT-A-CC--A-G--G-A-G-G-A-AC-A-CC--AA--T-G--GC-GAA-G--G-C-A-----G--G-T-T-C---TTG--G--AC-A-G-----A-A--G-G-T-GA--CG-C-T-G--A-GG--C-G-CG-A--AA-G-T---G-TG--GG-G--AG-C-G-AA-----CC--GG Bacteria(100);Deinococcus-Thermus(100);Deinococcales(100);Deinococcaceae(100);Deinococcus(100);unclassified(100);unclassified(100);unclassified(100);unclassified(100);                              |   |    |    |    |   |   |   |   |   |   |   |   |   |    |   |   |   |    |   |   |    |   |   |   |   |    |   |   |
| Otu0677                                                                                                                                                                                                                                                                                                                                                                                                                                                                                                                                                                                                                                                                                                                                                                                                            | 0 | 0  | 0  | 0  | 0 | 0 | 0 | 0 | 0 | 0 | 0 | 0 | 0 | 0  | 0 | 0 | 0 | 0  | 0 | 0 | 0  | 0 | 0 | 0 | 0 | 0  | 0 |   |
|                                                                                                                                                                                                                                                                                                                                                                                                                                                                                                                                                                                                                                                                                                                                                                                                                    | 0 | 0  | 0  | 0  | 0 | 0 | 0 | 0 | 0 | 0 | 0 | 0 | 0 | 24 | 0 | 0 | 0 | 0  | 0 | 0 | 0  | 0 | 0 | 0 | 0 | 0  | 0 |   |
|                                                                                                                                                                                                                                                                                                                                                                                                                                                                                                                                                                                                                                                                                                                                                                                                                    | 0 | 0  | 0  | 0  | 0 | 0 | 0 | 0 | 0 | 0 | 0 | 0 | 0 | 0  | 0 | 0 | 0 | 0  | 0 | 0 | 0  | 0 | 0 | 0 | 0 | 0  | 0 |   |
|                                                                                                                                                                                                                                                                                                                                                                                                                                                                                                                                                                                                                                                                                                                                                                                                                    | 0 | 0  | 0  | 42 | 0 | 0 | 6 | 0 | 0 | 0 | 0 | 0 | 0 | 0  | 0 | 0 | 0 | 0  | 0 | 0 | 0  | 0 | 0 | 0 | 0 | 0  | 0 |   |
| M02255_77_000000000-ADUT3_1_1102_13280_16706 T---AC---GA-AG-GGG-----GCT-A-G-----C--G-T---T-GC-T-CGG-AA-----TG-A-C-T--GG-GC-----GT-A----AA-GG-GC-GC-----G-TA-G-G-C-G-----G--T-TT-G-T-A-----CA---G-T-C-A-----G-A-T-G--TG--A-AA-TT--C-C-TG-G-G---CT-T-AA-----C-C-T-G-G-G-G--G-C---T-G--C-A--T-T-----T--GA-T-A--C-----G--T-G--CG--A-G-C---T-T-G-A-G-T-G--T-GA---AA-G-A-----G-G-G-T---CG-T---GG--A--ATT---C-C-C-A-GT--GT-A-G-AG-GT--G---A-A-A---TT-C-GT-AG--AT-A-TT--G-G--G-A-A-G-A-AC-A-CC--GG--T-G--GC-GAA-G--G-C-G-----G--C-G-A-C---CTG--G--TT-C-A-----T-T---A-C-T-GA--CG-C-T-G--A-GG--C-G-CG-A--AA-G-C---G-TG--GG-G--AG-C-A-AA-----CA--GG Bacteria(100);Proteobacteria(100);Alphaproteobacteria(100);Rhodospirillales(100);Acetobacteraceae(100);uncultured(77);unclassified(77);unclassified(77);unclassified(77); |   |    |    |    |   |   |   |   |   |   |   |   |   |    |   |   |   |    |   |   |    |   |   |   |   |    |   |   |
| Otu0678                                                                                                                                                                                                                                                                                                                                                                                                                                                                                                                                                                                                                                                                                                                                                                                                            | 0 | 0  | 0  | 0  | 0 | 0 | 0 | 0 | 0 | 0 | 0 | 0 | 0 | 0  | 0 | 0 | 1 | 0  | 0 | 0 | 0  | 0 | 5 | 4 | 0 | 0  | 0 | 0 |
|                                                                                                                                                                                                                                                                                                                                                                                                                                                                                                                                                                                                                                                                                                                                                                                                                    | 0 | 0  | 0  | 0  | 0 | 0 | 0 | 0 | 0 | 0 | 0 | 0 | 0 | 0  | 0 | 0 | 0 | 0  | 0 | 0 | 0  | 0 | 0 | 0 | 0 | 0  | 0 |   |
|                                                                                                                                                                                                                                                                                                                                                                                                                                                                                                                                                                                                                                                                                                                                                                                                                    | 0 | 0  | 0  | 0  | 0 | 0 | 0 | 0 | 0 | 0 | 0 | 0 | 0 | 0  | 0 | 0 | 0 | 0  | 0 | 0 | 0  | 0 | 0 | 0 | 0 | 0  | 0 |   |
|                                                                                                                                                                                                                                                                                                                                                                                                                                                                                                                                                                                                                                                                                                                                                                                                                    | 2 | 0  | 0  | 0  | 0 | 0 | 0 | 0 | 0 | 0 | 0 | 0 | 0 | 0  | 0 | 0 | 0 | 0  | 0 | 0 | 0  | 0 | 0 | 0 | 0 | 0  | 0 |   |
| M02255_76_000000000-ADUNE_1_2112_6585_8141 C---TA---AC-TC-TGT-----GCC-A-G-----C---A--G--CC-G-CGG-TA-----AT-A-C-A-GA-GG-----GT-----GC-GA-GC-GT-----T-AA-T---C-G-----G--C-TT-T-T-T-----AA---G-T-C-G-----G-A-T--G--TG--A-AA-GC--C-C-CG-A-G                                                                                                                                                                                                                                                                                                                                                                                                                                                                                                                                                                            |   |    |    |    |   |   |   |   |   |   |   |   |   |    |   |   |   |    |   |   |    |   |   |   |   |    |   |   |



[illegible]



[illegible]



|                                                                                                                                                                                                                              |   |   |   |   |   |    |   |   |   |    |    |   |   |    |   |   |   |   |   |   |   |   |   |   |    |    |   |   |
|------------------------------------------------------------------------------------------------------------------------------------------------------------------------------------------------------------------------------|---|---|---|---|---|----|---|---|---|----|----|---|---|----|---|---|---|---|---|---|---|---|---|---|----|----|---|---|
| Otu0690                                                                                                                                                                                                                      | 0 | 0 | 0 | 0 | 0 | 0  | 0 | 0 | 0 | 0  | 0  | 0 | 0 | 0  | 0 | 0 | 0 | 0 | 0 | 0 | 0 | 0 | 0 | 0 | 0  | 0  | 0 |   |
|                                                                                                                                                                                                                              | 0 | 0 | 0 | 0 | 0 | 0  | 0 | 0 | 0 | 0  | 0  | 0 | 0 | 0  | 0 | 0 | 0 | 0 | 0 | 0 | 0 | 0 | 0 | 0 | 0  | 0  | 0 |   |
|                                                                                                                                                                                                                              | 0 | 0 | 0 | 0 | 0 | 0  | 0 | 0 | 0 | 0  | 0  | 0 | 0 | 0  | 0 | 0 | 0 | 0 | 0 | 0 | 0 | 0 | 0 | 0 | 43 | 51 | 0 | 0 |
|                                                                                                                                                                                                                              | 0 | 0 | 0 | 0 | 0 | 0  | 0 | 0 | 0 | 0  | 0  | 0 | 0 | 0  | 0 | 0 | 0 | 0 | 0 | 0 | 0 | 0 | 0 | 0 | 0  | 0  |   |   |
| M02255_77_000000000-ADUT3_1_2106_3192_11017 T---AC---GG-AG-GGT-----GCA-A-G-----C--G--T--T--AT-C-CGG-AT-----TC-A--C-T--GG-G-----TT-----A---G--GC-----G---G-A-C-----TT--G-T-----AA---G-T-                                      |   |   |   |   |   |    |   |   |   |    |    |   |   |    |   |   |   |   |   |   |   |   |   |   |    |    |   |   |
| C-C-----G-T-G--G--TG--A-AA-TC--T-C-CG-A-G-----CT-T-AA-----C-T-C-G-G-A-A--A-C---T-G--C-C---A-T-----G--GA-T-A--C-----T--A-T--AG--G-T-C---T-T-G-A-A-T--G--T-TG----TG-G-A-----G-G-T-T--AG-C-----GG--A--ATA---G-T-T-C-AT--GT-     |   |   |   |   |   |    |   |   |   |    |    |   |   |    |   |   |   |   |   |   |   |   |   |   |    |    |   |   |
| A-G-CG-GT--G---A--A-A---TG-C-TT-AG--AT-A-TG--A-C--C-T-A-G-A-AC-A-CC---GA--T--T--GC-GAA-G--G-C-A-----G--C-T-G-G---CTA--C--AC-A-A-----C-G---A-T-T--GA--CG-C-T-G--A-GG--C-A-CG-A--AA-G-C---G-TG--GG-G--AT-C-A-AA----            |   |   |   |   |   |    |   |   |   |    |    |   |   |    |   |   |   |   |   |   |   |   |   |   |    |    |   |   |
| ---CA--GG Bacteria(100);Bacteroidetes(100);Sphingobacteria(100);Sphingobacteriales(100);Chitinophagaceae(100);unclassified(100);unclassified(100);unclassified(100);unclassified(100);                                       |   |   |   |   |   |    |   |   |   |    |    |   |   |    |   |   |   |   |   |   |   |   |   |   |    |    |   |   |
| Otu0691                                                                                                                                                                                                                      | 0 | 0 | 0 | 0 | 0 | 0  | 0 | 0 | 0 | 0  | 0  | 0 | 0 | 0  | 0 | 0 | 0 | 0 | 0 | 0 | 0 | 0 | 0 | 0 | 0  | 0  | 0 |   |
|                                                                                                                                                                                                                              | 0 | 0 | 0 | 0 | 0 | 0  | 0 | 0 | 0 | 0  | 0  | 0 | 0 | 23 | 0 | 0 | 0 | 0 | 0 | 0 | 0 | 0 | 0 | 0 | 0  | 0  | 0 |   |
|                                                                                                                                                                                                                              | 0 | 0 | 0 | 0 | 0 | 0  | 0 | 0 | 0 | 0  | 0  | 0 | 0 | 0  | 0 | 0 | 0 | 0 | 0 | 0 | 0 | 0 | 0 | 0 | 0  | 0  | 0 |   |
|                                                                                                                                                                                                                              | 0 | 0 | 0 | 0 | 0 | 0  | 0 | 0 | 0 | 0  | 0  | 0 | 0 | 0  | 0 | 0 | 0 | 0 | 0 | 0 | 0 | 0 | 0 | 6 | 0  | 0  | 0 |   |
| M02255_77_000000000-ADUT3_1_1113_3639_17456 T---AC---GT-AG-GGT-----GCA-A-G-----C--G--T--T--GT-C-CGG-AA-----TT-A--T-T--GG-GC-----GT--A-----AA-GA-GC-TC-----G-TA-G-G-C-G-----G--T-CT-G-T-C-----GC-                             |   |   |   |   |   |    |   |   |   |    |    |   |   |    |   |   |   |   |   |   |   |   |   |   |    |    |   |   |
| ---G-T-C-T-----G-G-T--G--TG--A-AA-AT--C-C-AG-G-G-----CT-T-AA-----C-C-C-T-G-G-A--C-C---T-G--C-A---T--T-----G--GG-T-A--C-----G--G-G--CA--G-A-C---T-A-G-A-G-T--G--C-GG-----TA-G-G-----G-G-A-G---AT-C-----GG--A--ATT---C-C-T-G-  |   |   |   |   |   |    |   |   |   |    |    |   |   |    |   |   |   |   |   |   |   |   |   |   |    |    |   |   |
| GT--GT-A-G-CG-GT--G---A--A-A---TG-C-GC-AG--AT-A-TC--A-G--G-A-G-G-A-AC-A-CC---GG--T--G--GC-GAA-G--G-C-G-----G--A-T-C-T---CTG--G--GC-C-G-----T-A---A-C-T--GA--CG-C-T-G--A-GG--A-G-CG-A--AA-G-C---A-TG--GG-G--AG-               |   |   |   |   |   |    |   |   |   |    |    |   |   |    |   |   |   |   |   |   |   |   |   |   |    |    |   |   |
| C-G-AA-----CA--GG Bacteria(100);Actinobacteria(100);Actinobacteria(100);Actinobacteridae(100);Actinomycetales(100);unclassified(100);unclassified(100);unclassified(100);unclassified(100);                                  |   |   |   |   |   |    |   |   |   |    |    |   |   |    |   |   |   |   |   |   |   |   |   |   |    |    |   |   |
| Otu0692                                                                                                                                                                                                                      | 0 | 0 | 0 | 0 | 0 | 0  | 0 | 0 | 0 | 42 | 0  | 0 | 0 | 0  | 0 | 0 | 0 | 0 | 0 | 0 | 0 | 0 | 0 | 2 | 0  | 0  | 0 | 0 |
|                                                                                                                                                                                                                              | 0 | 0 | 0 | 0 | 0 | 21 | 0 | 0 | 0 | 0  | 18 | 0 | 0 | 0  | 0 | 0 | 0 | 0 | 0 | 0 | 0 | 0 | 0 | 0 | 0  | 0  | 0 |   |
|                                                                                                                                                                                                                              | 0 | 0 | 0 | 0 | 0 | 0  | 0 | 0 | 0 | 0  | 0  | 0 | 0 | 0  | 0 | 0 | 0 | 0 | 0 | 0 | 0 | 0 | 0 | 0 | 0  | 0  | 0 |   |
|                                                                                                                                                                                                                              | 0 | 0 | 0 | 0 | 0 | 0  | 0 | 0 | 0 | 0  | 0  | 0 | 0 | 0  | 0 | 0 | 0 | 0 | 0 | 0 | 0 | 0 | 0 | 0 | 0  | 0  |   |   |
| M02255_77_000000000-ADUT3_1_1111_11898_20548 T---AC---GT-AG-GGT-----GCG-A-G-----C--G--T--T--GT-C-CGG-AA-----TT-A--C-T--GG-GC-----GT--A-----AA-GA-GC-TC-----G-TA-G-G-C-G-----G--T-TT-G-T-C-----                               |   |   |   |   |   |    |   |   |   |    |    |   |   |    |   |   |   |   |   |   |   |   |   |   |    |    |   |   |
| ----GC---G-T-C-G-----T-T-C--G--TG--A-AA-AC--T-T-GG-G-G-----CT-T-AA-----C-T-C-C-A-A-G--C-G---T-G--C-G---G-G-----C--GA-T-A--C-----G--G-G--CA--G-A-C---T-T-G-A-G-T--A---C-TA---CA-G-G-----G-G-A-G---AC-T-----GG--A--ATT---C-    |   |   |   |   |   |    |   |   |   |    |    |   |   |    |   |   |   |   |   |   |   |   |   |   |    |    |   |   |
| C-T-G-GT--GT-A-G-CG-GT--G---A--A-A---TG-C-GC-AG--AT-A-TC--A-G--G-A-G-G-A-AC-A-CC---GG--T--G--GC-GAA-G--G-C-G-----G--G-T-C-T---CTG--G--GT-A-G-----T-A---A-C-T--GA--CG-C-T-G--A-GG--A-G-CG-A--AA-G-C---G-TG--GG-               |   |   |   |   |   |    |   |   |   |    |    |   |   |    |   |   |   |   |   |   |   |   |   |   |    |    |   |   |
| T--AG-C-G-AA-----CA--GG Bacteria(100);Actinobacteria(100);Actinobacteria(100);Actinobacteridae(100);Actinomycetales(100);Corynebacterineae(76);unclassified(76);unclassified(76);unclassified(76);                           |   |   |   |   |   |    |   |   |   |    |    |   |   |    |   |   |   |   |   |   |   |   |   |   |    |    |   |   |
| Otu0693                                                                                                                                                                                                                      | 0 | 0 | 0 | 0 | 0 | 0  | 0 | 0 | 0 | 0  | 0  | 0 | 0 | 0  | 1 | 0 | 0 | 0 | 0 | 0 | 0 | 0 | 0 | 7 | 0  | 1  | 0 | 0 |
|                                                                                                                                                                                                                              | 6 | 0 | 0 | 0 | 0 | 0  | 0 | 0 | 0 | 0  | 0  | 1 | 0 | 0  | 0 | 0 | 0 | 0 | 0 | 0 | 0 | 0 | 0 | 0 | 0  | 0  | 0 |   |
|                                                                                                                                                                                                                              | 0 | 0 | 0 | 0 | 0 | 0  | 0 | 0 | 0 | 0  | 0  | 0 | 0 | 0  | 0 | 0 | 0 | 0 | 0 | 0 | 0 | 0 | 0 | 0 | 0  | 0  | 0 |   |
|                                                                                                                                                                                                                              | 0 | 0 | 0 | 0 | 0 | 0  | 0 | 0 | 0 | 0  | 0  | 0 | 0 | 0  | 0 | 0 | 0 | 0 | 0 | 0 | 0 | 0 | 1 | 0 | 3  | 0  | 0 |   |
| M02255_76_000000000-ADUNE_1_2114_21873_23625 T---GC---AG-AA-TAA-----GCA-C-C-----G--G--C---T-AACT-CTG-TG-----CC-A--G-C--AG-CC-----GC--G-----GT-AA-TA-CA-----G-AG-G-G-T-GC-----A--A-GC-G-T-T----                               |   |   |   |   |   |    |   |   |   |    |    |   |   |    |   |   |   |   |   |   |   |   |   |   |    |    |   |   |
| -----AA---G-T-C-G-----G-A-A--G--TG--A-AA-TC--C-C-CG-G-G-----CT-C-AA-----C-C-T-G-G-G-A--A-C---T-G--C-A---T--C-----T--GA-T-A--C-----T--G-T--TG--A-G-C---T-A-G-A-G-T--A---T-GT-----GA-G-A-----G-G-A-A---GG-T-----AG--A--ATT---- |   |   |   |   |   |    |   |   |   |    |    |   |   |    |   |   |   |   |   |   |   |   |   |   |    |    |   |   |
| C-C-A-G-GT--GG-A-G-CG-GT--G---A--A-A---TG-C-GT-AG--AG-A-TC--T-G--G-A-G-G-A-AT-A-CC---GA--T--G--GC-GAA-G--G-C--A-----G--C-C-T-T---CTG--G--CA-T-A-----A-T---A-C-T--GA--CA-C-T-G--A-GG--C-T-CG-A--AA-G-C---G-TG--GG-            |   |   |   |   |   |    |   |   |   |    |    |   |   |    |   |   |   |   |   |   |   |   |   |   |    |    |   |   |
| T--AG-C-A-AA-----CA--GG Bacteria(100);Proteobacteria(100);Gammaproteobacteria(100);Pseudomonadales(85);Moraxellaceae(85);unclassified(85);unclassified(85);unclassified(85);unclassified(85);                                |   |   |   |   |   |    |   |   |   |    |    |   |   |    |   |   |   |   |   |   |   |   |   |   |    |    |   |   |
| Otu0694                                                                                                                                                                                                                      | 0 | 0 | 0 | 0 | 0 | 0  | 0 | 0 | 0 | 0  | 0  | 0 | 0 | 0  | 0 | 0 | 0 | 0 | 0 | 0 | 0 | 0 | 0 | 0 | 0  | 0  | 0 |   |
|                                                                                                                                                                                                                              | 0 | 0 | 0 | 0 | 0 | 0  | 0 | 0 | 0 | 0  | 0  | 0 | 0 | 0  | 0 | 0 | 0 | 0 | 0 | 0 | 0 | 0 | 0 | 0 | 0  | 0  | 0 |   |
|                                                                                                                                                                                                                              | 0 | 0 | 0 | 0 | 0 | 0  | 0 | 0 | 4 | 0  | 0  | 0 | 0 | 0  | 0 | 0 | 0 | 0 | 0 | 0 | 0 | 0 | 0 | 0 | 0  | 0  | 0 |   |
|                                                                                                                                                                                                                              | 0 | 0 | 0 | 0 | 0 | 0  | 0 | 0 | 0 | 1  | 0  | 1 | 0 | 0  | 0 | 0 | 0 | 0 | 0 | 0 | 0 | 0 | 0 | 0 | 0  | 0  |   |   |
| M02255_76_000000000-ADUNE_1_1113_8994_21177 G---AC---AG-AA-TAA-----G-C-A-C-----CG-G--C---T-AACT-CTG-TG-----CC-A--G-C--AG-CC-----GC--G-----GT-AA-TA-CA-----G-AG-G-G-T-G-----A--A-GC-G-T-T-----                                |   |   |   |   |   |    |   |   |   |    |    |   |   |    |   |   |   |   |   |   |   |   |   |   |    |    |   |   |
| AA---G-T-C-G-----G-A-A--G--TG--A-AA-TC--C-C-CG-G-G-----CT-C-AA-----C-C-T-G-G-G-A--A-C---T-G--C-A---T--T-----C--AA-A-A--C-----T--G-T--CG--A-G-C---T-A-G-A-G-T--A---T-GG-----TA-G-A-----G-G-G-T--GG-T-----GG--A--ATT---T-C-C-  |   |   |   |   |   |    |   |   |   |    |    |   |   |    |   |   |   |   |   |   |   |   |   |   |    |    |   |   |
| T-GT--GT-A-G-CG-GT--G---A--A-A---TG-C-GT-AG--AT-A-TA--G-G--A-A-G-G-A-AC-A-CC---AG--T--G--GC-GAA-G--G-C-G-----A--C-C-A-C---CTG--G--AC-T-A-----A-T---A-C-T--GA--CA-C-T-G--A-GG--T-G-CG-A--AA-G-C---G-TG--GG-G--                |   |   |   |   |   |    |   |   |   |    |    |   |   |    |   |   |   |   |   |   |   |   |   |   |    |    |   |   |
| AG-C-A-AA-----CA--GG Bacteria(100);Proteobacteria(100);Gammaproteobacteria(100);unclassified(100);unclassified(100);unclassified(100);unclassified(100);unclassified(100);unclassified(100);                                 |   |   |   |   |   |    |   |   |   |    |    |   |   |    |   |   |   |   |   |   |   |   |   |   |    |    |   |   |



|                                                                                                                                                                                                                      |   |   |   |   |   |   |   |   |   |   |   |   |   |   |    |   |   |   |    |    |    |     |    |   |   |   |   |
|----------------------------------------------------------------------------------------------------------------------------------------------------------------------------------------------------------------------|---|---|---|---|---|---|---|---|---|---|---|---|---|---|----|---|---|---|----|----|----|-----|----|---|---|---|---|
| Otu0695                                                                                                                                                                                                              | 0 | 0 | 0 | 0 | 0 | 0 | 0 | 0 | 0 | 0 | 0 | 0 | 0 | 0 | 0  | 0 | 0 | 0 | 5  | 0  | 0  | 0   | 0  | 0 | 0 | 0 | 0 |
|                                                                                                                                                                                                                      | 0 | 0 | 0 | 0 | 0 | 0 | 0 | 0 | 0 | 0 | 0 | 0 | 0 | 0 | 0  | 0 | 0 | 0 | 0  | 0  | 0  | 0   | 0  | 0 | 0 | 0 | 0 |
|                                                                                                                                                                                                                      | 0 | 0 | 0 | 0 | 0 | 0 | 0 | 0 | 0 | 0 | 0 | 0 | 0 | 0 | 0  | 0 | 0 | 0 | 0  | 0  | 0  | 0   | 0  | 0 | 0 | 0 | 0 |
|                                                                                                                                                                                                                      | 0 | 0 | 0 | 0 | 0 | 0 | 0 | 0 | 0 | 0 | 0 | 0 | 0 | 0 | 74 | 0 | 0 | 0 | 0  | 0  | 0  | 0   | 10 | 0 | 0 | 0 | 0 |
| M02255_77_000000000-ADUT3_1_2104_17621_13932 T---AC---GG-AG-GGA-----GCT-A-G-----C-G-T---T-GT-T-CGG-AA-----TT-A-C-T-GG-GC-----GT--A-----AA-GC-GT-AC-----G-TA-G-G-C-G-----G--T-TA-T-T-C-----                           |   |   |   |   |   |   |   |   |   |   |   |   |   |   |    |   |   |   |    |    |    |     |    |   |   |   |   |
| -----AA---G-T-C-A-----G-A-G--G--TG--A-AA-GC--C-C-GG-G-G-----CT-C-AA-----C-C-C-C-G-G-A-A-C---G-G--C-C--T-T-----T--GA-A-A--C-----T-A-G--AT--A-G-C---T-A-G-A-G-T-C---T-TG---GA-G-A-----G-G-T-T--AG-T-----GG--A-ATT---C- |   |   |   |   |   |   |   |   |   |   |   |   |   |   |    |   |   |   |    |    |    |     |    |   |   |   |   |
| C-G-A-GT--GT-A-G-AG-GT--G---A-A-A---TT-C-GT-AG--AT-A-TT--C-G--G-A-A-G-A-AC-A-CC--AG--T-G--GC-GAA-G--G-C-G-----A-C-T-A-A---CTG--G--AC-A-A-----G-T--A-C-T-GA--CG-C-T-G--A-GG--T-A-CG-A-AA-G-C--G-TG--GG-               |   |   |   |   |   |   |   |   |   |   |   |   |   |   |    |   |   |   |    |    |    |     |    |   |   |   |   |
| G--AG-C-A-AA-----CA--GG Bacteria(100);Proteobacteria(100);Alphaproteobacteria(100);Sphingomonadales(100);Sphingomonadaceae(100);Novosphingobium(100);unclassified(100);unclassified(100);unclassified(100);          |   |   |   |   |   |   |   |   |   |   |   |   |   |   |    |   |   |   |    |    |    |     |    |   |   |   |   |
| Otu0696                                                                                                                                                                                                              | 0 | 0 | 0 | 0 | 0 | 0 | 0 | 0 | 0 | 0 | 0 | 0 | 0 | 0 | 0  | 0 | 0 | 0 | 0  | 0  | 0  | 0   | 16 | 0 | 0 | 0 | 0 |
|                                                                                                                                                                                                                      | 0 | 0 | 0 | 0 | 0 | 0 | 0 | 0 | 0 | 0 | 0 | 0 | 0 | 0 | 0  | 0 | 0 | 0 | 0  | 0  | 0  | 0   | 0  | 0 | 0 | 0 |   |
|                                                                                                                                                                                                                      | 0 | 0 | 0 | 0 | 0 | 0 | 0 | 0 | 0 | 0 | 0 | 0 | 0 | 0 | 0  | 0 | 0 | 0 | 0  | 0  | 0  | 0   | 0  | 0 | 0 | 0 |   |
|                                                                                                                                                                                                                      | 0 | 0 | 0 | 0 | 0 | 0 | 0 | 0 | 0 | 0 | 0 | 0 | 0 | 0 | 0  | 0 | 0 | 0 | 0  | 0  | 0  | 5   | 0  | 0 | 0 | 0 |   |
| M02255_77_000000000-ADUT3_1_2101_23598_7201 T---AC---GG-AG-GGG-----GCT-A-G-----C-G-T---T-GT-T-CGG-AA-----TT-A-C-T-GG-GC-----GT--A-----AA-GC-GC-AC-----G-TA-G-G-C-G-----G--A-CT-G-G-A-----                            |   |   |   |   |   |   |   |   |   |   |   |   |   |   |    |   |   |   |    |    |    |     |    |   |   |   |   |
| AA---G-T-T-A-----G-A-G--G--TG--A-AA-TC--C-C-GG-G-G-----CT-C-AA-----C-C-C-C-G-G-A-A-C---T-G--C-C--T-T-----T--AA-A-A--C-----T--C-T--CA--G-T-C---T-T-G-A-G-T-T--C-GA---GA-G-A-----G-G-T-G--AG-T-----GG--A-ATT---C-C-G-  |   |   |   |   |   |   |   |   |   |   |   |   |   |   |    |   |   |   |    |    |    |     |    |   |   |   |   |
| A-GT--GT-A-G-AG-GT--G---A-A-A---TT-C-GT-AG--AT-A-TT--C-G--G-A-G-G-A-AC-A-CC--AG--T-G--GC-GAA-G--G-C-G-----G--C-T-C-A---CTG--G--CT-C-G-----A-T--A-C-T-GA--CG-C-T-G--A-GG--T-G-CG-A-AA-G-C--G-TG--GG-G-                |   |   |   |   |   |   |   |   |   |   |   |   |   |   |    |   |   |   |    |    |    |     |    |   |   |   |   |
| AG-C-A-AA-----CA--GG Bacteria(100);Proteobacteria(100);Alphaproteobacteria(100);Rhodobacterales(77);Rhodobacteraceae(77);unclassified(77);unclassified(77);unclassified(77);unclassified(77);                        |   |   |   |   |   |   |   |   |   |   |   |   |   |   |    |   |   |   |    |    |    |     |    |   |   |   |   |
| Otu0697                                                                                                                                                                                                              | 0 | 0 | 0 | 0 | 0 | 0 | 0 | 0 | 0 | 0 | 0 | 0 | 0 | 0 | 0  | 0 | 0 | 0 | 0  | 0  | 0  | 0   | 0  | 0 | 6 | 0 | 0 |
|                                                                                                                                                                                                                      | 0 | 0 | 0 | 0 | 0 | 0 | 0 | 0 | 0 | 0 | 0 | 0 | 0 | 0 | 0  | 0 | 0 | 0 | 0  | 0  | 0  | 0   | 0  | 0 | 0 | 0 |   |
|                                                                                                                                                                                                                      | 0 | 0 | 0 | 0 | 0 | 0 | 0 | 0 | 0 | 0 | 0 | 0 | 0 | 0 | 0  | 0 | 0 | 0 | 0  | 0  | 0  | 112 | 0  | 0 | 0 | 0 |   |
|                                                                                                                                                                                                                      | 0 | 0 | 0 | 0 | 0 | 0 | 0 | 0 | 0 | 0 | 0 | 0 | 0 | 0 | 0  | 0 | 0 | 0 | 0  | 0  | 0  | 0   | 0  | 0 | 0 | 0 |   |
| M02255_77_000000000-ADUT3_1_1101_17052_22306 T---AC---GA-AG-GGG-----GCT-A-G-----C-G-T---T-GT-T-CGG-AA-----TT-A-C-T-GG-GC-----GT--A-----AA-GC-GC-AC-----G-TA-G-G-C-G-----G--G-TG-G-T-T---                             |   |   |   |   |   |   |   |   |   |   |   |   |   |   |    |   |   |   |    |    |    |     |    |   |   |   |   |
| -----AA---G-T-T-A-----G-G-G--G--TG--A-AA-TC--C-C-GG-A-G---CT-C-AA-----C-T-C-C-G-G-A-A-C---T-G--C-C--T-T-----T--GA-T-A--C-----T--G-G--CC--A-T-C---T-A-G-A-G-A-T--C-GG---AA-G-A-----G-G-T-G--AG-T-----GG--A-ATT---     |   |   |   |   |   |   |   |   |   |   |   |   |   |   |    |   |   |   |    |    |    |     |    |   |   |   |   |
| C-C-C-A-GT--GT-A-G-AG-GT--G---A-A-A---TT-C-GT-AG--AT-A-TT--G-G--G-A-A-G-A-AC-A-CC--GG--T-G--GC-GAA-G--G-C-G-----G--C-T-C-A---CTG--G--TC-C-G-----A-T--A-C-T-GA--CG-C-T-G--A-GG--T-G-CG-A-AA-G-C--G-TG--GG-            |   |   |   |   |   |   |   |   |   |   |   |   |   |   |    |   |   |   |    |    |    |     |    |   |   |   |   |
| G--AG-C-A-AA-----CA--GG Bacteria(100);Proteobacteria(100);Alphaproteobacteria(100);Rhizobiales(100);unclassified(100);unclassified(100);unclassified(100);unclassified(100);unclassified(100);                       |   |   |   |   |   |   |   |   |   |   |   |   |   |   |    |   |   |   |    |    |    |     |    |   |   |   |   |
| Otu0698                                                                                                                                                                                                              | 0 | 0 | 0 | 0 | 0 | 0 | 0 | 0 | 0 | 0 | 0 | 0 | 0 | 0 | 0  | 0 | 0 | 0 | 0  | 0  | 0  | 13  | 12 | 1 | 0 | 0 | 6 |
|                                                                                                                                                                                                                      | 2 | 0 | 0 | 0 | 0 | 0 | 0 | 0 | 0 | 0 | 0 | 0 | 0 | 0 | 0  | 0 | 0 | 0 | 14 | 14 | 0  | 0   | 0  | 0 | 0 | 0 | 0 |
|                                                                                                                                                                                                                      | 0 | 0 | 0 | 0 | 0 | 0 | 0 | 0 | 0 | 0 | 0 | 0 | 0 | 0 | 0  | 0 | 0 | 0 | 0  | 0  | 92 | 18  | 0  | 0 | 0 | 0 | 0 |
|                                                                                                                                                                                                                      | 0 | 0 | 0 | 0 | 0 | 0 | 0 | 0 | 0 | 0 | 0 | 0 | 0 | 0 | 0  | 0 | 0 | 0 | 0  | 0  | 0  | 0   | 17 | 0 | 0 | 0 |   |
| M02255_76_000000000-ADUNE_1_1116_14770_13985 G---AA---GC-AC-CGG-----CTA-A-C-----T-C-C---G--TG-C-CAG-CA-----GC-C--G-C--GG-TA-----AT--A-----CG-GA-GG-GT-----G-CG-A-G-C-G-----G--T-TA-A-TGT---                          |   |   |   |   |   |   |   |   |   |   |   |   |   |   |    |   |   |   |    |    |    |     |    |   |   |   |   |
| -----AA---G-T-C-A-----G-A-T--G--TG--A-AA-TC--C-C-AG-G-G---CT-C-AA-----C-C-T-T-G-G-A-A-C---T-G--C-A--T-T-----T--GA-A-A--C-----T--G-G--TT--A-A-C---T-A-G-A-G-T-T--T-TG---TA-G-A-----G-G-G-T--GG-T-----AG--A-ATT---T-   |   |   |   |   |   |   |   |   |   |   |   |   |   |   |    |   |   |   |    |    |    |     |    |   |   |   |   |
| C-A-G-GT--GT-A-G-CG-GT--G---A-A-A---TG-C-GT-AG--AG-A-TC--T-G--A-A-G-G-A-AT-A-CC--AG--T-G--GC-GAA-G--G-C-G-----G--C-C-A-C---CTG--G--AC-A-A-----A-G--A-C-T--GA--CG-C-T-G--A-GG--C-G-CG-A--AG-G-C--G-TG--GG-            |   |   |   |   |   |   |   |   |   |   |   |   |   |   |    |   |   |   |    |    |    |     |    |   |   |   |   |
| G--AG-C-G-AA-----CG--GG Bacteria(100);Proteobacteria(100);Gammaproteobacteria(100);Alteromonadales(100);Psychromonadaceae(100);Psychromonas(100);unclassified(100);unclassified(100);unclassified(100);              |   |   |   |   |   |   |   |   |   |   |   |   |   |   |    |   |   |   |    |    |    |     |    |   |   |   |   |
| Otu0699                                                                                                                                                                                                              | 0 | 0 | 0 | 0 | 0 | 2 | 0 | 0 | 0 | 0 | 0 | 1 | 0 | 0 | 0  | 0 | 1 | 0 | 0  | 0  | 0  | 0   | 5  | 0 | 0 | 0 | 0 |
|                                                                                                                                                                                                                      | 1 | 0 | 0 | 0 | 0 | 0 | 0 | 0 | 0 | 0 | 0 | 0 | 0 | 0 | 0  | 0 | 0 | 0 | 0  | 0  | 0  | 0   | 0  | 0 | 0 | 0 |   |
|                                                                                                                                                                                                                      | 0 | 0 | 0 | 0 | 0 | 0 | 0 | 0 | 0 | 0 | 0 | 0 | 0 | 0 | 0  | 0 | 0 | 0 | 0  | 0  | 1  | 4   | 0  | 0 | 0 | 0 |   |
|                                                                                                                                                                                                                      | 0 | 0 | 0 | 0 | 0 | 0 | 0 | 5 | 0 | 0 | 0 | 0 | 0 | 0 | 0  | 0 | 3 | 0 | 0  | 0  | 3  | 0   | 1  | 0 | 0 | 0 |   |
| M02255_76_000000000-ADUNE_1_1115_28438_17513 T---AA---GC-AC-CGG-----CTA-A-C-----T-C-T---G--TG-C-CAG-CA-----GC-C--G-C--GG-TA-----AT--A-----CA-GA-GG-GT-----G-CA-A-G-C-GT-----T--A-AT-C-G-G-----                       |   |   |   |   |   |   |   |   |   |   |   |   |   |   |    |   |   |   |    |    |    |     |    |   |   |   |   |
| -----AA---G-T-C-A-----G-A-T--G--TG--A-AA-TC--C-C-CG-G-G---CT-C-AA-----C-C-T-T-G-G-A-A-C---T-G--C-A--T-C-----T--GA-T-A--C-----T--G-T--TG--A-G-C---T-A-G-A-G-T-A--T-GT---GA-G-A-----G-G-A-A--GG-T-----AG--A-ATT---C-   |   |   |   |   |   |   |   |   |   |   |   |   |   |   |    |   |   |   |    |    |    |     |    |   |   |   |   |
| C-A-G-GT--GT-A-G-CG-GT--G---A-A-A---TG-C-GT-AG--AG-A-TC--T-G--G-A-G-G-A-AT-A-CC--GA--T-G--GC-GAA-G--G-C-A-----G--C-C-T-T---CTG--G--CA-T-A-----A-T--A-C-T--GA--CA-C-T-G--A-GG--C-T-CG-A-AA-G-C--G-TG--GG-T-           |   |   |   |   |   |   |   |   |   |   |   |   |   |   |    |   |   |   |    |    |    |     |    |   |   |   |   |
| -AG-C-A-AA-----CA--GG Bacteria(100);Proteobacteria(100);Gammaproteobacteria(100);Pseudomonadales(100);Moraxellaceae(100);unclassified(100);unclassified(100);unclassified(100);unclassified(100);                    |   |   |   |   |   |   |   |   |   |   |   |   |   |   |    |   |   |   |    |    |    |     |    |   |   |   |   |



|                                                                                                                                                                                                                                                                                                                                                                                                                                                                                                                                                                                                                                                                                                                                                                                                                                                  |    |   |   |   |   |   |   |    |    |    |   |   |    |    |   |   |   |   |     |   |   |    |   |   |   |   |    |   |
|--------------------------------------------------------------------------------------------------------------------------------------------------------------------------------------------------------------------------------------------------------------------------------------------------------------------------------------------------------------------------------------------------------------------------------------------------------------------------------------------------------------------------------------------------------------------------------------------------------------------------------------------------------------------------------------------------------------------------------------------------------------------------------------------------------------------------------------------------|----|---|---|---|---|---|---|----|----|----|---|---|----|----|---|---|---|---|-----|---|---|----|---|---|---|---|----|---|
| Otu0700                                                                                                                                                                                                                                                                                                                                                                                                                                                                                                                                                                                                                                                                                                                                                                                                                                          | 0  | 0 | 0 | 0 | 0 | 0 | 0 | 0  | 0  | 0  | 0 | 0 | 0  | 0  | 0 | 0 | 0 | 0 | 0   | 0 | 0 | 0  | 0 | 0 | 0 | 0 | 12 |   |
|                                                                                                                                                                                                                                                                                                                                                                                                                                                                                                                                                                                                                                                                                                                                                                                                                                                  | 0  | 0 | 0 | 1 | 0 | 0 | 0 | 0  | 0  | 29 | 1 | 0 | 0  | 0  | 0 | 0 | 0 | 0 | 0   | 0 | 0 | 0  | 0 | 0 | 0 | 0 | 0  |   |
|                                                                                                                                                                                                                                                                                                                                                                                                                                                                                                                                                                                                                                                                                                                                                                                                                                                  | 0  | 0 | 0 | 0 | 0 | 0 | 0 | 0  | 0  | 0  | 0 | 0 | 0  | 0  | 0 | 0 | 0 | 0 | 0   | 0 | 0 | 0  | 0 | 0 | 0 | 0 | 0  |   |
|                                                                                                                                                                                                                                                                                                                                                                                                                                                                                                                                                                                                                                                                                                                                                                                                                                                  | 0  | 0 | 0 | 0 | 0 | 0 | 0 | 0  | 0  | 0  | 0 | 0 | 0  | 0  | 0 | 0 | 0 | 0 | 0   | 0 | 0 | 0  | 0 | 0 | 0 |   |    |   |
| M02255_77_000000000-ADUT3_1_1109_14054_20139 G---AC---GG-AG-GGT-----GCT-A-G-----C-G--T---T--GT-T-CGG-AA-----TG-A--C-T--GG-GC-----GT--A----AA-GG-GC-GC-----G-TA-G-G-C-G-----G--C-CG-C-T-T-----GC---G-T-C-G-----G-A-T--G--TG--A-AA-GC--C-C-GG-G-G-----CT-C-AA-----C-C-C-C-G-G-A--A-C---T-G--C-A--T--C-----C-GA-T-A--C-----G--G-G--GC-G-G-C---T-C-G-A-G-A-C--C-GA---GA-G-A-----G-G-T-G--AG-T-----GG--A--ATA---C-C-C-A-GT--GT-A-G-AG-GT--G---A--A-A---TT-C-GT-AG--AT-A-TT--G-G--G-T-G-G-A-AC-A-CC---GG--T--G--GC-GAA-A--G-C-G-----G--C-T-C-A---CTG--G--CT-C-G-----G-T---T-C-T--GA--CG-C-T-G--A-GG--C-G-CG-A--AA-G-C---G-T-G-GG-G--AG-C-A-AA-----CA--GG Bacteria(100);Proteobacteria(100);Alphaproteobacteria(100);unclassified(100);unclassified(100);unclassified(100);unclassified(100);unclassified(100);unclassified(100);                       |    |   |   |   |   |   |   |    |    |    |   |   |    |    |   |   |   |   |     |   |   |    |   |   |   |   |    |   |
| Otu0701                                                                                                                                                                                                                                                                                                                                                                                                                                                                                                                                                                                                                                                                                                                                                                                                                                          | 0  | 0 | 0 | 0 | 0 | 0 | 0 | 0  | 0  | 0  | 0 | 0 | 1  | 0  | 0 | 0 | 0 | 0 | 0   | 1 | 0 | 0  | 0 | 2 | 0 | 0 | 0  | 0 |
|                                                                                                                                                                                                                                                                                                                                                                                                                                                                                                                                                                                                                                                                                                                                                                                                                                                  | 0  | 0 | 0 | 0 | 0 | 0 | 0 | 0  | 0  | 0  | 0 | 0 | 0  | 0  | 0 | 0 | 0 | 0 | 0   | 0 | 0 | 0  | 0 | 0 | 0 | 0 | 0  |   |
|                                                                                                                                                                                                                                                                                                                                                                                                                                                                                                                                                                                                                                                                                                                                                                                                                                                  | 0  | 0 | 0 | 0 | 0 | 0 | 0 | 0  | 0  | 0  | 0 | 0 | 0  | 0  | 0 | 0 | 0 | 0 | 0   | 0 | 4 | 0  | 0 | 0 | 0 | 0 | 0  |   |
|                                                                                                                                                                                                                                                                                                                                                                                                                                                                                                                                                                                                                                                                                                                                                                                                                                                  | 3  | 0 | 0 | 0 | 0 | 0 | 0 | 0  | 3  | 0  | 0 | 1 | 3  | 0  | 0 | 0 | 0 | 0 | 1   | 0 | 6 | 15 | 1 | 0 | 0 |   |    |   |
| M02255_76_000000000-ADUNE_1_2112_4534_7687 T---GC--AG-AA-TAA-----GCA-C-C-----G--G--C---T-AA--C-T-CT-----GT-G--C-C--AG-CA-----GC--C---GC-GG-TA-AT-----A-CA--G-A-G-----G--G-TG-C-A-A-----GC---G-T-T-A-----G-A-T--C--GG--A-AA-TC--C-C-CG-G-G-----CT-T-AA-----C-C-T-G-G-G-A--A-C---T-G--C-A--T--C-----T-GA-A-A--C-----T--G-T-AG--A-G-C---T-A-G-A-G-T-A--T-GT---GA-G-A-----G-G-A-A--GG-T-----AG--A--ATT---C-C-A-G-GT--GT-A-G-CG-GT--G---A--A-A---TG-C-GT-AG--AG-A-TC--T-G--G-A-G-G-A-AT-A-CC--GA--T--G--GC-GAA-G--G-C-A-----G--C-C-T-T---CTG--G--CA-T-A-----A-T---A-C-T--GA--CA-C-T-G--A-GG--C-T-CG-A--AA-G-C---G-TG--GG-T--AG-C-A-AA-----CA--GG Bacteria(100);Proteobacteria(100);Gammaproteobacteria(100);Pseudomonadales(100);Moraxellaceae(100);unclassified(100);unclassified(100);unclassified(100);unclassified(100);                          |    |   |   |   |   |   |   |    |    |    |   |   |    |    |   |   |   |   |     |   |   |    |   |   |   |   |    |   |
| Otu0702                                                                                                                                                                                                                                                                                                                                                                                                                                                                                                                                                                                                                                                                                                                                                                                                                                          | 0  | 0 | 0 | 0 | 0 | 0 | 1 | 29 | 0  | 0  | 0 | 0 | 0  | 0  | 0 | 0 | 0 | 0 | 0   | 0 | 0 | 0  | 0 | 0 | 0 | 0 | 0  |   |
|                                                                                                                                                                                                                                                                                                                                                                                                                                                                                                                                                                                                                                                                                                                                                                                                                                                  | 0  | 0 | 0 | 0 | 0 | 0 | 0 | 0  | 0  | 0  | 0 | 0 | 0  | 0  | 0 | 0 | 0 | 0 | 0   | 0 | 0 | 0  | 0 | 0 | 0 | 0 | 0  |   |
|                                                                                                                                                                                                                                                                                                                                                                                                                                                                                                                                                                                                                                                                                                                                                                                                                                                  | 0  | 0 | 0 | 0 | 0 | 0 | 0 | 0  | 0  | 0  | 0 | 0 | 0  | 0  | 0 | 0 | 0 | 0 | 0   | 0 | 8 | 0  | 0 | 0 | 0 | 0 | 0  |   |
|                                                                                                                                                                                                                                                                                                                                                                                                                                                                                                                                                                                                                                                                                                                                                                                                                                                  | 0  | 0 | 0 | 0 | 0 | 0 | 0 | 0  | 0  | 0  | 0 | 0 | 0  | 0  | 0 | 0 | 0 | 0 | 0   | 0 | 0 | 0  | 0 | 0 | 0 |   |    |   |
| M02255_77_000000000-ADUT3_1_1116_9980_13623 T---AC--GT-AG-GGA-----GCA-A-G-----C--G--T---T--AT-C-CGG-AT-----TT-A--T-T--GG-GT-----GT--A----AA-GG-GT-GC-----G-TA-G-A-C-G-----G--G-AA-G-G-T-----AA---G-T-T-A-----G-T-T--G--TG--A-AA-TC--C-C-TC-G-G-----CT-C-AA-----C-T-G-A-G-G-A--A-C---T-G--C-G--A--C-----T-AA-A-A--C-----T--G-C--TT--T-T-C---T-T-G-A-G-T--G---C-TG---GA-G-A-----G-G-A-A--AG-T-----GG--A--ATT---C-C-T-A-GT--GT-A-G-CG-GT--G---A--A-A---TG-C-GT-AG--AT-A-TT--A-G--G-A-G-G-A-AC-A-CC--AG--T--G--GC-GAA-G--G-C--G-----A--C-T-T-T---CTG--G--AC-A-G-----T-A---A-C-T--GA--CG-T-T-G--A-GG--C-A-CG-A--AA-G-T---G-TG--GG-G--AG-C-A-AA-----CA--GG Bacteria(100);Firmicutes(100);Clostridia(100);Clostridiales(100);Ruminococcaceae(100);uncultured(100);unclassified(100);unclassified(100);unclassified(100);                                |    |   |   |   |   |   |   |    |    |    |   |   |    |    |   |   |   |   |     |   |   |    |   |   |   |   |    |   |
| Otu0703                                                                                                                                                                                                                                                                                                                                                                                                                                                                                                                                                                                                                                                                                                                                                                                                                                          | 0  | 0 | 0 | 0 | 0 | 0 | 0 | 0  | 0  | 0  | 0 | 0 | 0  | 0  | 0 | 0 | 0 | 0 | 2   | 2 | 0 | 0  | 0 | 0 | 0 | 0 | 0  |   |
|                                                                                                                                                                                                                                                                                                                                                                                                                                                                                                                                                                                                                                                                                                                                                                                                                                                  | 0  | 0 | 0 | 0 | 0 | 0 | 0 | 0  | 20 | 0  | 0 | 0 | 20 | 0  | 0 | 0 | 0 | 0 | 140 | 0 | 0 | 0  | 0 | 0 | 0 | 0 | 0  |   |
|                                                                                                                                                                                                                                                                                                                                                                                                                                                                                                                                                                                                                                                                                                                                                                                                                                                  | 0  | 0 | 0 | 0 | 0 | 0 | 0 | 0  | 0  | 0  | 0 | 0 | 0  | 0  | 0 | 0 | 0 | 0 | 0   | 0 | 0 | 0  | 0 | 0 | 0 | 0 | 0  |   |
|                                                                                                                                                                                                                                                                                                                                                                                                                                                                                                                                                                                                                                                                                                                                                                                                                                                  | 18 | 0 | 0 | 0 | 0 | 0 | 0 | 0  | 0  | 0  | 0 | 3 | 0  | 0  | 0 | 0 | 0 | 0 | 0   | 0 | 0 | 0  | 0 | 0 | 0 |   |    |   |
| M02255_77_000000000-ADUT3_1_2116_25388_18113 T---AC--GT-AG-GGT-----ACT-A-G-----C--G--T---T--GT-C-CGG-AA-----TT-A--T-T--GG-GC-----GT--A----AA-GA-GC-TC-----G-TA-G-G-T-G-----G--T-TT-G-T-C-----GC---G-T-C-T-----G-C-T--G--TG--G-AA-AG--G-T-GC-C-G-----CT-T-AA-----C-G-G-T-G-C-G--C-G---T-G--C-A--G--T-----G--GG-T-A--C-----G--G-G--CG--G-A-C---T-A-G-A-G-T--G---C-AG---TA-G-G-----G-G-A-G---TC-T-----GG--A--ATT---C-C-T-G-GT--GT-A-G-CG-GT--G---A--A-A---TG-C-GC-AG--AT-A-TC--A-G--G-A-G-G-A-AC-A-CC--GG--T--G--GC-GAA-G--G-C--G-----G--G-A-C-T---CTG--G--GC-T-G-----T-T---A-C-T--GA--CG-C-T-G--A-GG--A-G-CG-A--AA-G-C---A-TG--GG-G--AG-C-G-AA-----CA--GG Bacteria(100);Actinobacteria(100);Actinobacteria(100);Actinobacteridae(100);Actinomycetales(100);Micrococcineae(100);unclassified(100);unclassified(100);unclassified(100);              |    |   |   |   |   |   |   |    |    |    |   |   |    |    |   |   |   |   |     |   |   |    |   |   |   |   |    |   |
| Otu0704                                                                                                                                                                                                                                                                                                                                                                                                                                                                                                                                                                                                                                                                                                                                                                                                                                          | 0  | 0 | 0 | 0 | 0 | 0 | 0 | 2  | 0  | 0  | 0 | 0 | 0  | 0  | 0 | 0 | 0 | 0 | 0   | 0 | 0 | 0  | 0 | 0 | 0 | 0 | 0  |   |
|                                                                                                                                                                                                                                                                                                                                                                                                                                                                                                                                                                                                                                                                                                                                                                                                                                                  | 0  | 0 | 0 | 4 | 0 | 0 | 0 | 0  | 0  | 0  | 0 | 6 | 0  | 11 | 0 | 0 | 0 | 0 | 0   | 0 | 0 | 0  | 1 | 0 | 0 | 0 | 9  |   |
|                                                                                                                                                                                                                                                                                                                                                                                                                                                                                                                                                                                                                                                                                                                                                                                                                                                  | 0  | 0 | 0 | 0 | 5 | 0 | 0 | 0  | 0  | 0  | 0 | 0 | 0  | 0  | 0 | 0 | 0 | 0 | 3   | 0 | 0 | 0  | 0 | 0 | 0 | 4 | 0  |   |
|                                                                                                                                                                                                                                                                                                                                                                                                                                                                                                                                                                                                                                                                                                                                                                                                                                                  | 0  | 0 | 3 | 0 | 0 | 0 | 0 | 0  | 0  | 0  | 0 | 0 | 0  | 0  | 0 | 0 | 0 | 0 | 0   | 0 | 0 | 0  | 0 | 0 | 0 |   |    |   |
| M02255_76_000000000-ADUNE_1_2106_26449_5125 G---AA--GC-AC-CG-----GCT-A-A-----C-----T--C--CG-T--GC-CA-----GC-A--G-C--CG-CG-----GT--A----AT-AC-GG-A-----G-GG-T-G-C-A-----A--G-CT-G-T-T-----AA---G-T-C-G-----G-A-A--G--TG--A-AA-TC--C-C-CG-G-G-----CT-T-AA-----C-C-T-G-G-G-A--A-C---T-G--C-A--T--T-----T-GA-A-A--C-----T--G-G--CA--G-G-C---T-T-G-A-G-T--C---T-TG---TA-G-A-----G-G-G-G--GG-T-----AG--A--ATT---C-C-A-G-GT--GT-A-G-CG-GT--G---A--A-A---TG-C-GT-AG--AG-A-TC--T-G--G-A-G-G-A-AT-A-CC--GG--T--G--GC-GAA-G--G-C--G-----G--C-C-C-C---CTG--G--AC-A-A-----A-G---A-C-T--GA--CG-C-T-C--A-GG--T-G-CG-A--AA-G-C---G-TG--GG-G--AG-C-A-AA-----CA--GG Bacteria(100);Proteobacteria(100);Gammaproteobacteria(100);Enterobacteriales(100);Enterobacteriaceae(100);Enteric_Bacteria_cluster(100);unclassified(100);unclassified(100);unclassified(100); |    |   |   |   |   |   |   |    |    |    |   |   |    |    |   |   |   |   |     |   |   |    |   |   |   |   |    |   |



|                                                                                                                                                                                                                            |   |   |   |    |   |   |   |   |   |   |   |   |                                                                                                                                                                                     |    |    |   |    |   |   |   |   |   |    |   |   |    |   |
|----------------------------------------------------------------------------------------------------------------------------------------------------------------------------------------------------------------------------|---|---|---|----|---|---|---|---|---|---|---|---|-------------------------------------------------------------------------------------------------------------------------------------------------------------------------------------|----|----|---|----|---|---|---|---|---|----|---|---|----|---|
| Otu0705                                                                                                                                                                                                                    | 0 | 0 | 0 | 0  | 0 | 0 | 0 | 0 | 0 | 0 | 0 | 0 | 0                                                                                                                                                                                   | 0  | 0  | 0 | 0  | 0 | 0 | 0 | 0 | 0 | 0  | 0 | 0 | 0  | 0 |
|                                                                                                                                                                                                                            | 0 | 0 | 0 | 0  | 0 | 0 | 0 | 0 | 0 | 0 | 0 | 0 | 38                                                                                                                                                                                  | 79 | 30 | 0 | 0  | 0 | 0 | 0 | 0 | 0 | 31 | 9 | 0 | 0  | 0 |
|                                                                                                                                                                                                                            | 0 | 0 | 0 | 0  | 0 | 0 | 0 | 0 | 0 | 0 | 0 | 0 | 0                                                                                                                                                                                   | 0  | 0  | 0 | 0  | 0 | 0 | 0 | 0 | 0 | 0  | 0 | 0 | 0  |   |
|                                                                                                                                                                                                                            | 0 | 0 | 0 | 0  | 0 | 0 | 0 | 0 | 0 | 0 | 0 | 0 | 24                                                                                                                                                                                  | 0  | 0  | 0 | 25 | 0 | 2 | 0 | 0 | 0 | 0  | 0 | 0 |    |   |
| M02255_77_000000000-ADUT3_1_1114_10222_13542                                                                                                                                                                               |   |   |   |    |   |   |   |   |   |   |   |   | G---AC---GG-AG-GGG-----GCT-A-G-----C--G--T---T--GT-T-CGG-AA-----TG-A--C-T--GG-GC-----GT--A----AA-GG-GC-GC-----G-TA-G-G-C-G-----G--T-TT-T-T-T----                                    |    |    |   |    |   |   |   |   |   |    |   |   |    |   |
| -----AA---G-T-G-A-----G-G-C-G-TG--A-AA-GC--C-C-TG-G-G-----CT-T-AA-----C-C-C-A-G-G-A--G-G---T-G--C-G---T-T-----T--CA-T-A--C-----T--G-G-AA--G-A-C---T-T-G-A-G-T--A---C-GA-----GA-G-A-----G-G-A-A--AG-C-----GG--A--ATT----    |   |   |   |    |   |   |   |   |   |   |   |   |                                                                                                                                                                                     |    |    |   |    |   |   |   |   |   |    |   |   |    |   |
| C-C-T-A-GT--GT-A-G-AG-GT--G---A--A---TT-C-GT-AG--AT-A-TT--A-G--G-A-A-G-A-AC-A-CC--AG--T--G--GC-GAA-G--G-C--G-----G--C-T-T-T---CTG--G--CT-C-G-----T-A---A-C-T--GA--CG-C-T-G--A-GG--C-G-CG-A--AA-G-C---G-TG--GG-             |   |   |   |    |   |   |   |   |   |   |   |   |                                                                                                                                                                                     |    |    |   |    |   |   |   |   |   |    |   |   |    |   |
| G--AG-C-A-AA-----CA--GG                                                                                                                                                                                                    |   |   |   |    |   |   |   |   |   |   |   |   | Bacteria(100);Proteobacteria(79);unclassified(79);unclassified(79);unclassified(79);unclassified(79);unclassified(79);unclassified(79);unclassified(79);                            |    |    |   |    |   |   |   |   |   |    |   |   |    |   |
| Otu0706                                                                                                                                                                                                                    | 0 | 0 | 0 | 0  | 0 | 0 | 0 | 0 | 0 | 0 | 0 | 0 | 0                                                                                                                                                                                   | 0  | 0  | 0 | 0  | 0 | 0 | 0 | 0 | 0 | 0  | 0 | 0 | 0  |   |
|                                                                                                                                                                                                                            | 0 | 0 | 0 | 0  | 0 | 0 | 0 | 0 | 0 | 0 | 0 | 0 | 0                                                                                                                                                                                   | 0  | 0  | 0 | 0  | 0 | 0 | 0 | 0 | 0 | 0  | 0 | 0 | 0  |   |
|                                                                                                                                                                                                                            | 0 | 0 | 0 | 0  | 0 | 0 | 0 | 0 | 0 | 0 | 0 | 0 | 0                                                                                                                                                                                   | 0  | 0  | 0 | 0  | 0 | 0 | 0 | 0 | 0 | 0  | 0 | 0 | 52 |   |
|                                                                                                                                                                                                                            | 0 | 0 | 0 | 0  | 0 | 0 | 0 | 0 | 0 | 0 | 0 | 0 | 0                                                                                                                                                                                   | 0  | 0  | 0 | 0  | 0 | 0 | 0 | 0 | 0 | 0  | 0 | 0 |    |   |
| M02255_77_000000000-ADUT3_1_1106_4216_6191                                                                                                                                                                                 |   |   |   |    |   |   |   |   |   |   |   |   | T---AC---GT-AT-GGT-----GCA-A-G-----C--G--T---T--AT-C-CGG-AT-----TT-A--C-T--GG-GT-----GT--A----AA-GG-GT-GC-----G-TA-G-G-T-G-----G--T-AT-G-G-C-----AA-                                |    |    |   |    |   |   |   |   |   |    |   |   |    |   |
| ---G-T-C-A-----G-A-A-G--TG--A-AA-GG--C-T-GG-G-G-----CT-C-AA-----C-C-C-C-G-G-G--A-C---T-G--C-T---T-T-----T--GA-A-A--C-----T--G-T-CA--A-A-C---T-A-G-A-G-T--A---C-AG-----GA-G-A-----G-G-A-A--AG-C-----GG--A--ATT---C-C-T-A-   |   |   |   |    |   |   |   |   |   |   |   |   |                                                                                                                                                                                     |    |    |   |    |   |   |   |   |   |    |   |   |    |   |
| GT--GT-A-G-CG-GT--G---A--A---TG-C-GT-AG--AT-A-TT--A-G--G-A-G-G-A-AC-A-CC--AG--T--G--GC-GAA-G--G-C--G-----G--C-T-T-T---CTG--G--AC-T-G-----A-A---A-C-T--GA--CA-C-T-G--A-GG--C-A-CG-A--AA-G-C---G-TG--GG-G--AG-               |   |   |   |    |   |   |   |   |   |   |   |   |                                                                                                                                                                                     |    |    |   |    |   |   |   |   |   |    |   |   |    |   |
| C-A-AA-----CA--GG                                                                                                                                                                                                          |   |   |   |    |   |   |   |   |   |   |   |   | Bacteria(100);Firmicutes(100);Clostridia(100);Clostridiales(100);Lachnospiraceae(100);unclassified(100);unclassified(100);unclassified(100);unclassified(100);                      |    |    |   |    |   |   |   |   |   |    |   |   |    |   |
| Otu0707                                                                                                                                                                                                                    | 0 | 0 | 0 | 0  | 0 | 0 | 0 | 0 | 0 | 0 | 0 | 0 | 0                                                                                                                                                                                   | 0  | 0  | 0 | 0  | 0 | 0 | 0 | 0 | 0 | 0  | 0 | 0 | 0  |   |
|                                                                                                                                                                                                                            | 0 | 0 | 1 | 22 | 0 | 0 | 0 | 0 | 0 | 0 | 0 | 0 | 0                                                                                                                                                                                   | 0  | 0  | 0 | 9  | 0 | 0 | 0 | 0 | 0 | 0  | 0 | 0 | 0  |   |
|                                                                                                                                                                                                                            | 0 | 0 | 0 | 0  | 0 | 0 | 0 | 0 | 0 | 0 | 0 | 0 | 0                                                                                                                                                                                   | 0  | 0  | 0 | 0  | 0 | 0 | 0 | 0 | 0 | 0  | 0 | 0 | 0  |   |
|                                                                                                                                                                                                                            | 0 | 0 | 0 | 0  | 0 | 0 | 0 | 0 | 0 | 0 | 0 | 0 | 0                                                                                                                                                                                   | 0  | 0  | 0 | 0  | 0 | 0 | 0 | 0 | 0 | 0  | 0 |   |    |   |
| M02255_77_000000000-ADUT3_1_1111_18620_14640                                                                                                                                                                               |   |   |   |    |   |   |   |   |   |   |   |   | G---AC---GT-AG-GGC-----GCG-A-G-----C--G--T---T--GT-C-CGG-AT-----TT-A--T-T--GG-GC-----GT--A----AA-GA-GC-TC-----G-TA-G-G-C-G-----G--C-TT-G-T-C-----                                   |    |    |   |    |   |   |   |   |   |    |   |   |    |   |
| -----GC---G-T-C-G-----G-C-T-G--TG--A-AA-TC--C-C-GT-G-G-----CT-C-AA-----C-T-G-C-G-G-G--C-T---T-G--C-A--G--C-----C--GA-T-A--C-----G--G-G--CA-G-G-C---T-A-G-A-G-T--T---C-GG-----TA-G-G-----G-G-A-G--AC-T-----GG--A--ATT---    |   |   |   |    |   |   |   |   |   |   |   |   |                                                                                                                                                                                     |    |    |   |    |   |   |   |   |   |    |   |   |    |   |
| C-C-T-G-GT--GT-A-G-CG-GT--G---A--A---TG-C-GC-AG--AT-A-TC--A-G--G-A-G-G-A-AC-A-CC--GG--T--G--GC-GAA-G--G-C--G-----G--G-T-C-T---CTG--G--GC-C-G-----A-T---A-C-T--GA--CG-C-T-G--A-GG--A-G-CG-A--AA-G-C---G-TG--                |   |   |   |    |   |   |   |   |   |   |   |   |                                                                                                                                                                                     |    |    |   |    |   |   |   |   |   |    |   |   |    |   |
| GG-G--AG-C-G-AA-----CA--GG                                                                                                                                                                                                 |   |   |   |    |   |   |   |   |   |   |   |   | Bacteria(100);Actinobacteria(100);Actinobacteria(100);Actinobacteridae(100);Actinomycetales(100);Micromonosporineae(100);Micromonosporaceae(100);unclassified(69);unclassified(69); |    |    |   |    |   |   |   |   |   |    |   |   |    |   |
| Otu0708                                                                                                                                                                                                                    | 0 | 0 | 0 | 0  | 0 | 0 | 0 | 0 | 0 | 0 | 0 | 4 | 0                                                                                                                                                                                   | 0  | 1  | 0 | 0  | 4 | 0 | 0 | 0 | 0 | 0  | 0 | 0 | 0  |   |
|                                                                                                                                                                                                                            | 0 | 0 | 0 | 0  | 0 | 0 | 0 | 0 | 0 | 0 | 0 | 0 | 0                                                                                                                                                                                   | 0  | 0  | 0 | 0  | 0 | 0 | 0 | 0 | 0 | 0  | 0 | 0 | 0  |   |
|                                                                                                                                                                                                                            | 0 | 0 | 0 | 0  | 0 | 0 | 0 | 0 | 0 | 0 | 0 | 0 | 0                                                                                                                                                                                   | 0  | 0  | 0 | 0  | 0 | 0 | 0 | 0 | 0 | 0  | 0 | 0 | 0  |   |
|                                                                                                                                                                                                                            | 0 | 0 | 0 | 0  | 0 | 2 | 0 | 0 | 0 | 0 | 0 | 0 | 0                                                                                                                                                                                   | 0  | 0  | 0 | 0  | 0 | 0 | 0 | 0 | 0 | 0  | 0 |   |    |   |
| M02255_77_000000000-ADUT3_1_1108_19997_5721                                                                                                                                                                                |   |   |   |    |   |   |   |   |   |   |   |   | C---TA---AC-TC-TGT-----GCC-A-G-----C----A--G--CC-G-CGG-TA-----AT-A--C-A--GA-GG-----GTG-C----AA-GC-GT-TA-----A-TC-G-GAT-G-----G--C-CA-A-T-T-----AA-                                  |    |    |   |    |   |   |   |   |   |    |   |   |    |   |
| ---G-T-C-A-----A-A-T--G--TG--A-AA-TC--C-C-CG-A-G-----CT-T-AA-----C-T-T-G-G-G-A--A-T---T-G--C-A--T-T-----C--GA-T-A--C-----T--G-G--TT--G-G-C---T-A-G-A-G-T--A---T-GG-----GA-G-A-----G-G-A-T---GG-T-----AG--A--ATT---C-C-A-G- |   |   |   |    |   |   |   |   |   |   |   |   |                                                                                                                                                                                     |    |    |   |    |   |   |   |   |   |    |   |   |    |   |
| GT--GT-A-G-CG-GT--G---A--A---TG-C-GT-AG--AG-A-TC--T-G--G-A-G-G-A-AT-A-CC--GA--T--G--GC-GAA-G--G-C--A-----G--C-C-A-T---CTG--G--CC-T-A-----A-T---A-C-T--GA--CA-C-T-G--A-GG--T-A-CG-A--AA-G-C---A-TG--GG-G--AG-C-             |   |   |   |    |   |   |   |   |   |   |   |   |                                                                                                                                                                                     |    |    |   |    |   |   |   |   |   |    |   |   |    |   |
| A-AA-----CA--GG                                                                                                                                                                                                            |   |   |   |    |   |   |   |   |   |   |   |   | Bacteria(100);Proteobacteria(100);Gammaproteobacteria(100);Pseudomonadales(100);Moraxellaceae(100);Acinetobacter(100);unclassified(100);unclassified(100);unclassified(100);        |    |    |   |    |   |   |   |   |   |    |   |   |    |   |
| Otu0709                                                                                                                                                                                                                    | 0 | 0 | 0 | 0  | 0 | 0 | 0 | 0 | 0 | 0 | 0 | 0 | 0                                                                                                                                                                                   | 0  | 0  | 0 | 0  | 0 | 0 | 0 | 0 | 0 | 0  | 0 | 0 | 0  |   |
|                                                                                                                                                                                                                            | 0 | 0 | 0 | 0  | 0 | 0 | 0 | 0 | 0 | 0 | 0 | 0 | 0                                                                                                                                                                                   | 0  | 0  | 0 | 0  | 0 | 0 | 0 | 0 | 0 | 12 | 0 | 0 | 0  |   |
|                                                                                                                                                                                                                            | 0 | 0 | 0 | 0  | 0 | 0 | 0 | 0 | 0 | 0 | 0 | 0 | 0                                                                                                                                                                                   | 0  | 0  | 0 | 0  | 0 | 0 | 0 | 0 | 0 | 0  | 0 | 0 | 0  |   |
|                                                                                                                                                                                                                            | 0 | 0 | 0 | 0  | 0 | 0 | 0 | 0 | 0 | 0 | 0 | 4 | 0                                                                                                                                                                                   | 0  | 0  | 0 | 0  | 0 | 0 | 0 | 0 | 0 | 0  | 0 |   |    |   |
| M02255_77_000000000-ADUT3_1_2115_24363_5982                                                                                                                                                                                |   |   |   |    |   |   |   |   |   |   |   |   | T---AC---GA-AG-GGG-----GCT-A-G-----C--G--T---T--GC-T-CGG-AA-----TG-A--C-T--GG-GC-----GT--A----AA-GG-GC-GC-----G-TA-G-G-C-G-----G--T-TT-A-C-A-----                                   |    |    |   |    |   |   |   |   |   |    |   |   |    |   |
| CA---G-T-C-A-----G-G-T--G--TG--A-AA-TT--C-C-CG-G-G-----CT-T-AA-----C-C-T-G-G-G-G--G-C---T-G--C-A--T-T-----T--GA-T-A--C-----G--T-G--TA--G-A-C---T-A-G-A-G-T--G---T-GA-----GA-G-A-----G-G-G-T---TG-T-----GG--A--ATT---C-T-C- |   |   |   |    |   |   |   |   |   |   |   |   |                                                                                                                                                                                     |    |    |   |    |   |   |   |   |   |    |   |   |    |   |
| A-GT--GT-A-G-AG-GT--G---A--A---TT-C-GT-AG--AT-A-TT--G-G--G-A-A-G-A-AC-A-CC--GG--T--G--GC-GAA-G--G-C--G-----G--C-A-A-C---CTG--G--CT-C-A-----T-C---A-C-T--GA--CG-C-T-G--A-GG--C-G-CG-A--AA-G-C---G-TG--GG-G--                |   |   |   |    |   |   |   |   |   |   |   |   |                                                                                                                                                                                     |    |    |   |    |   |   |   |   |   |    |   |   |    |   |
| AG-C-A-AA-----CA--GG                                                                                                                                                                                                       |   |   |   |    |   |   |   |   |   |   |   |   | Bacteria(100);Proteobacteria(100);Alphaproteobacteria(100);Rhodospirillales(100);Acetobacteraceae(100);unclassified(100);unclassified(100);unclassified(100);unclassified(100);     |    |    |   |    |   |   |   |   |   |    |   |   |    |   |



|                                                                                                                                                                                                                                                                                                                                                                                                                                                                                                                                                                                                                                                                                                                                                                                                                                  |   |   |   |    |   |   |   |   |   |   |    |   |   |   |   |    |   |   |   |   |   |   |   |   |   |   |   |
|----------------------------------------------------------------------------------------------------------------------------------------------------------------------------------------------------------------------------------------------------------------------------------------------------------------------------------------------------------------------------------------------------------------------------------------------------------------------------------------------------------------------------------------------------------------------------------------------------------------------------------------------------------------------------------------------------------------------------------------------------------------------------------------------------------------------------------|---|---|---|----|---|---|---|---|---|---|----|---|---|---|---|----|---|---|---|---|---|---|---|---|---|---|---|
| Otu0710                                                                                                                                                                                                                                                                                                                                                                                                                                                                                                                                                                                                                                                                                                                                                                                                                          | 0 | 0 | 0 | 0  | 0 | 0 | 0 | 0 | 0 | 0 | 16 | 0 | 0 | 0 | 0 | 3  | 0 | 0 | 0 | 0 | 0 | 0 | 0 | 0 | 0 | 0 | 0 |
|                                                                                                                                                                                                                                                                                                                                                                                                                                                                                                                                                                                                                                                                                                                                                                                                                                  | 0 | 0 | 0 | 0  | 0 | 0 | 0 | 0 | 0 | 0 | 0  | 0 | 0 | 0 | 0 | 0  | 0 | 0 | 0 | 0 | 0 | 0 | 0 | 0 | 0 | 0 |   |
|                                                                                                                                                                                                                                                                                                                                                                                                                                                                                                                                                                                                                                                                                                                                                                                                                                  | 0 | 0 | 0 | 0  | 0 | 0 | 0 | 0 | 0 | 0 | 0  | 0 | 0 | 0 | 0 | 0  | 0 | 0 | 0 | 0 | 0 | 0 | 0 | 0 | 0 | 0 |   |
|                                                                                                                                                                                                                                                                                                                                                                                                                                                                                                                                                                                                                                                                                                                                                                                                                                  | 0 | 0 | 0 | 0  | 0 | 0 | 0 | 0 | 0 | 0 | 0  | 0 | 0 | 0 | 0 | 0  | 0 | 0 | 0 | 0 | 0 | 0 | 0 | 0 | 0 |   |   |
| M02255_76_000000000-ADUNE_1_1117_16642_9063 C---GG---CT-AA-CTC-----TGT-G-C-----C--A--G---C--AG-C-CGC-GG-----TA-A--T-A--CG-TA-----G---G----TG-GC-AA-GC-----G-TT-GTC-C-G-----G--T-TT-T-T-T-----AA---G-T-C-T-----G-A-T--G--TG--A-AA-GC--C-C-CC-G-G-----CT-C-AA-----C-C-G-G-G-G-A--G-----G-GT-C-A---T--T-----G--GA-A-A---C-----T--G-G--AG--A-A-C---T-T-G-A-G-T--G---C-AG-----AA-G-A-----G-G-A-G---AG-T-----GG--A--ATT---C-C-A-C-GT--GT-A-G-CG-GT--G---A--A-A---TG-C-GT-AG--AT-A-TG--T-G--G-A-G-G-A-AC-A-CC---AG--T--G--GC-GAA-G--G-C-G-----A--C-T-C-T---CTG--G--TC-T-G-----T-A---A-C-T--GA--CG-C-T-G--A-GG--C-T-CG-A--AA-G-C---G-TG--GG-G--AG-C-A-AA-----CA--GG Bacteria(100);Firmicutes(100);Bacilli(100);unclassified(100);unclassified(100);unclassified(100);unclassified(100);unclassified(100);unclassified(100);              |   |   |   |    |   |   |   |   |   |   |    |   |   |   |   |    |   |   |   |   |   |   |   |   |   |   |   |
| Otu0711                                                                                                                                                                                                                                                                                                                                                                                                                                                                                                                                                                                                                                                                                                                                                                                                                          | 0 | 0 | 0 | 0  | 0 | 0 | 0 | 0 | 0 | 0 | 0  | 0 | 0 | 1 | 0 | 18 | 0 | 0 | 1 | 0 | 0 | 1 | 0 | 0 | 0 | 0 | 0 |
|                                                                                                                                                                                                                                                                                                                                                                                                                                                                                                                                                                                                                                                                                                                                                                                                                                  | 0 | 0 | 0 | 0  | 0 | 0 | 0 | 0 | 0 | 0 | 0  | 0 | 0 | 0 | 0 | 0  | 0 | 0 | 0 | 0 | 0 | 0 | 0 | 0 | 0 | 1 |   |
|                                                                                                                                                                                                                                                                                                                                                                                                                                                                                                                                                                                                                                                                                                                                                                                                                                  | 0 | 0 | 0 | 0  | 0 | 0 | 0 | 0 | 0 | 0 | 0  | 0 | 0 | 0 | 0 | 0  | 0 | 0 | 0 | 0 | 0 | 0 | 0 | 0 | 0 | 0 |   |
|                                                                                                                                                                                                                                                                                                                                                                                                                                                                                                                                                                                                                                                                                                                                                                                                                                  | 0 | 0 | 0 | 0  | 0 | 0 | 0 | 0 | 0 | 0 | 0  | 0 | 0 | 0 | 0 | 0  | 0 | 0 | 0 | 0 | 0 | 0 | 0 | 0 | 0 |   |   |
| M02255_77_000000000-ADUT3_1_1110_27116_9784 A---AG---CC-AC-G-G-----CTA-A-C-----T--A--C---G--TG-C-CAG-CA-----GC-C--G-C--GG-TA-----AT--A---CG-TA-GG-TG-----G-CA-A-G-C-G-----G--T--T-G-T-C-----CG---G-A-C-T-----G-A-T--G--TG--A-AA-GC--C-C-CC-G-G-----CT-C-AA-----C-C-G-G-G-G-A--G-----G-GT-C-A---T--T-----G--GA-A-A---C-----T--G-G--GA--G-A-C---T-T-G-A-G-G-A--C-AG-----AA-G-A-----G-G-A-G---AG-T-----GG--A--ATT---C-C-A-A-GT--GT-A-G-CG-GT--G---A--A-A---TG-C-GT-AG--AT-A-TT--T-G--G-A-G-G-A-AC-A-CC---AG--T--G--GC-GAA-G--G-C-G-----G--C-T-C-T---CTG--G--TC-T-G-----T-T---A-C-T--GA--CG-C-T-G--A-GG--C-G-CG-A--AA-G-C---G-TG--GG-G--AG-C-A-AA-----CA--GG Bacteria(100);Firmicutes(100);Bacilli(100);Bacillales(100);unclassified(100);unclassified(100);unclassified(100);unclassified(100);unclassified(100);unclassified(100); |   |   |   |    |   |   |   |   |   |   |    |   |   |   |   |    |   |   |   |   |   |   |   |   |   |   |   |
| Otu0712                                                                                                                                                                                                                                                                                                                                                                                                                                                                                                                                                                                                                                                                                                                                                                                                                          | 0 | 0 | 0 | 0  | 0 | 0 | 0 | 0 | 0 | 0 | 55 | 1 | 0 | 0 | 0 | 0  | 0 | 0 | 0 | 0 | 0 | 0 | 1 | 0 | 0 | 0 | 0 |
|                                                                                                                                                                                                                                                                                                                                                                                                                                                                                                                                                                                                                                                                                                                                                                                                                                  | 0 | 0 | 1 | 0  | 0 | 0 | 0 | 0 | 0 | 1 | 0  | 0 | 0 | 0 | 0 | 0  | 0 | 0 | 0 | 0 | 0 | 0 | 0 | 0 | 0 | 0 |   |
|                                                                                                                                                                                                                                                                                                                                                                                                                                                                                                                                                                                                                                                                                                                                                                                                                                  | 0 | 0 | 0 | 0  | 0 | 0 | 0 | 5 | 0 | 0 | 0  | 0 | 0 | 1 | 0 | 0  | 0 | 0 | 0 | 0 | 0 | 0 | 0 | 0 | 0 | 0 |   |
|                                                                                                                                                                                                                                                                                                                                                                                                                                                                                                                                                                                                                                                                                                                                                                                                                                  | 0 | 0 | 0 | 0  | 0 | 0 | 1 | 1 | 0 | 0 | 0  | 0 | 0 | 0 | 0 | 0  | 0 | 3 | 0 | 0 | 0 | 0 | 0 | 0 | 0 |   |   |
| M02255_76_000000000-ADUNE_1_2101_25339_5746 A---AG---CC-AC-G-G-----CTA-A-C-----T--A--C---G--TG-C-CAG-CA-----GC-C--G-C--GG-TA-----AT--A---CG-TA-GG-TG-----G-CA-A-G-C-G-----T--TGTC-C-G-G-----AA---G-T-C-T-----G-A-T--G--TG--A-AA-GC--C-C-CC-G-G-----CT-C-AA-----C-C-G-G-G-G-A--G-----G-GT-C-A---T--T-----G--GA-A-A---C-----T--G-G--AG--A-A-C---T-T-G-A-G-T--G---C-AG-----AA-G-A-----G-G-A-G---AG-T-----GG--A--ATT---C-C-A-C-GT--GT-A-G-CG-GT--G---A--A-A---TG-C-GT-AG--AT-A-TG--T-G--G-A-G-G-A-AC-A-CC---AG--T--G--GC-GAA-G--G-C-G-----A--C-T-C-T---CTG--G--TC-T-G-----T-A---A-C-T--GA--CG-C-T-G--A-GG--C-T-CG-A--AA-G-C---G-TG--GG-G--AG-C-A-AA-----CA--GG Bacteria(100);Firmicutes(100);Bacilli(100);unclassified(100);unclassified(100);unclassified(100);unclassified(100);unclassified(100);unclassified(100);               |   |   |   |    |   |   |   |   |   |   |    |   |   |   |   |    |   |   |   |   |   |   |   |   |   |   |   |
| Otu0713                                                                                                                                                                                                                                                                                                                                                                                                                                                                                                                                                                                                                                                                                                                                                                                                                          | 0 | 0 | 0 | 0  | 0 | 0 | 0 | 0 | 0 | 0 | 0  | 0 | 0 | 0 | 0 | 0  | 0 | 0 | 0 | 0 | 0 | 0 | 0 | 0 | 0 | 0 |   |
|                                                                                                                                                                                                                                                                                                                                                                                                                                                                                                                                                                                                                                                                                                                                                                                                                                  | 0 | 0 | 0 | 85 | 0 | 0 | 0 | 0 | 0 | 0 | 0  | 0 | 0 | 0 | 0 | 0  | 0 | 0 | 0 | 0 | 0 | 0 | 0 | 0 | 0 | 0 |   |
|                                                                                                                                                                                                                                                                                                                                                                                                                                                                                                                                                                                                                                                                                                                                                                                                                                  | 0 | 0 | 0 | 0  | 0 | 0 | 0 | 0 | 0 | 0 | 0  | 0 | 0 | 0 | 0 | 0  | 0 | 0 | 0 | 0 | 0 | 0 | 0 | 0 | 0 | 0 |   |
|                                                                                                                                                                                                                                                                                                                                                                                                                                                                                                                                                                                                                                                                                                                                                                                                                                  | 0 | 0 | 0 | 0  | 0 | 0 | 0 | 0 | 0 | 0 | 0  | 0 | 0 | 0 | 0 | 0  | 0 | 0 | 0 | 0 | 0 | 0 | 0 | 0 | 0 |   |   |
| M02255_77_000000000-ADUT3_1_2105_14360_10388 G---AC---GG-AG-GGC-----GCG-A-G-----C--G--T---T--AT-T-CGT-TT-----TG-A--T-T--GG-GT-----GT--A---AA-GG-GT-AT-----G-TA-G-G-C-G-----GCCC-CT-A-G-T-----TT---T-T-T-G-----G-C-T--A--AA--A-AA-GC--G-G-AG-T-G-----TT-C-CT-----A-T-G-C-T-A-T--A-T---G-G--C-C---T--T-----T--GA-A-A-----A--A-G--GG--G-G-C---T-T-G-T-G-T--T---G-AT-----GA-T-A-----G-G-T-C---GG-G-----GC--A--AGT---T-C-T-T-AT--GT-A-G-GG-GT--A---G--A-A---TC-C-CA-CC--AT-A-TG--A-G--A-A-C-G-A-AC-G-AC---AGC-T--G--GC-GAA-G--G-C-G-----C--C-C-T-T---CCC--G---C-T-T-----C-A---A-C-A--GA--CG-C-T-A--A-GG--T-A-CG-G--AA-G-C---T-TA--GG-T--AG-C-A-AA-----CG--GG Bacteria(100);unclassified(100);unclassified(100);unclassified(100);unclassified(100);unclassified(100);unclassified(100);unclassified(100);unclassified(100);           |   |   |   |    |   |   |   |   |   |   |    |   |   |   |   |    |   |   |   |   |   |   |   |   |   |   |   |
| Otu0714                                                                                                                                                                                                                                                                                                                                                                                                                                                                                                                                                                                                                                                                                                                                                                                                                          | 0 | 0 | 0 | 0  | 0 | 0 | 0 | 0 | 0 | 0 | 44 | 5 | 0 | 0 | 1 | 1  | 0 | 0 | 0 | 0 | 0 | 3 | 0 | 0 | 0 | 0 | 0 |
|                                                                                                                                                                                                                                                                                                                                                                                                                                                                                                                                                                                                                                                                                                                                                                                                                                  | 0 | 0 | 0 | 0  | 0 | 0 | 0 | 0 | 0 | 0 | 0  | 0 | 0 | 0 | 0 | 0  | 1 | 0 | 0 | 0 | 0 | 0 | 0 | 0 | 0 | 0 |   |
|                                                                                                                                                                                                                                                                                                                                                                                                                                                                                                                                                                                                                                                                                                                                                                                                                                  | 0 | 0 | 0 | 0  | 0 | 0 | 0 | 3 | 0 | 1 | 0  | 0 | 0 | 0 | 0 | 0  | 0 | 0 | 0 | 0 | 0 | 0 | 0 | 0 | 0 | 0 |   |
|                                                                                                                                                                                                                                                                                                                                                                                                                                                                                                                                                                                                                                                                                                                                                                                                                                  | 0 | 0 | 0 | 0  | 0 | 0 | 0 | 0 | 0 | 0 | 0  | 0 | 0 | 0 | 0 | 0  | 0 | 0 | 0 | 0 | 0 | 0 | 0 | 0 | 0 |   |   |
| M02255_76_000000000-ADUNE_1_2106_27273_12167 .....AC---T-AC-GTG-----CCA-G-C-----A--G--C---T--G--C-GGT-AA-----TA-C--G-T--AG-GT-----GG--C---AA-GC-G--TT-----G---T-C-C-G-----G--A-TC-T-T-T-----AA---G-T-C-T-----G-A-T--G--TG--A-AA-GC--C-C-CC-G-G-----CT-C-AA-----C-C-G-G-G-G-A--G-----G-GT-C-A---T--T-----G--GA-A-A---C-----T--G-G--AG--A-A-C---T-T-G-A-G-T--G---C-AG-----AA-G-A-----G-G-A-G---AG-T-----GG--A--ATT---C-C-A-C-GT--GT-A-G-CG-GT--G---A--A-A---TG-C-GT-AG--AT-A-TG--T-G--G-A-G-G-A-AC-A-CC---AG--T--G--GC-GAA-G--G-C-G-----A--C-T-C-T---CTG--G--TC-T-G-----T-A---A-C-T--GA--CG-C-T-G--A-GG--C-T-CG-A--AA-G-C---G-TG--GG-G--AG-C-A-AA-----CA--GG Bacteria(100);Firmicutes(100);Bacilli(100);unclassified(100);unclassified(100);unclassified(100);unclassified(100);unclassified(100);unclassified(100);               |   |   |   |    |   |   |   |   |   |   |    |   |   |   |   |    |   |   |   |   |   |   |   |   |   |   |   |



|                                             |                                                                                                                                                 |                                                                                                                                                                                                                       |                                                                                                                                                                                                      |                                                   |                                                                                                                                                                                                        |                 |                                                                                                                                                                             |   |   |   |   |   |   |   |   |   |   |   |   |   |     |   |   |   |   |   |    |   |
|---------------------------------------------|-------------------------------------------------------------------------------------------------------------------------------------------------|-----------------------------------------------------------------------------------------------------------------------------------------------------------------------------------------------------------------------|------------------------------------------------------------------------------------------------------------------------------------------------------------------------------------------------------|---------------------------------------------------|--------------------------------------------------------------------------------------------------------------------------------------------------------------------------------------------------------|-----------------|-----------------------------------------------------------------------------------------------------------------------------------------------------------------------------|---|---|---|---|---|---|---|---|---|---|---|---|---|-----|---|---|---|---|---|----|---|
| Otu0715                                     | 0                                                                                                                                               | 0                                                                                                                                                                                                                     | 0                                                                                                                                                                                                    | 0                                                 | 0                                                                                                                                                                                                      | 0               | 22                                                                                                                                                                          | 0 | 0 | 0 | 0 | 0 | 0 | 0 | 0 | 0 | 0 | 0 | 0 | 0 | 0   | 0 | 0 | 0 | 0 | 0 | 0  |   |
|                                             | 0                                                                                                                                               | 0                                                                                                                                                                                                                     | 0                                                                                                                                                                                                    | 0                                                 | 0                                                                                                                                                                                                      | 0               | 0                                                                                                                                                                           | 0 | 0 | 0 | 0 | 0 | 0 | 0 | 0 | 0 | 0 | 0 | 0 | 0 | 0   | 0 | 0 | 0 | 0 | 0 | 0  |   |
|                                             | 0                                                                                                                                               | 0                                                                                                                                                                                                                     | 0                                                                                                                                                                                                    | 0                                                 | 0                                                                                                                                                                                                      | 0               | 0                                                                                                                                                                           | 0 | 0 | 0 | 0 | 0 | 0 | 0 | 0 | 0 | 0 | 0 | 0 | 0 | 0   | 0 | 0 | 0 | 0 | 0 | 0  |   |
|                                             | 0                                                                                                                                               | 0                                                                                                                                                                                                                     | 0                                                                                                                                                                                                    | 0                                                 | 0                                                                                                                                                                                                      | 0               | 8                                                                                                                                                                           | 0 | 0 | 0 | 0 | 0 | 0 | 0 | 0 | 0 | 0 | 0 | 0 | 0 | 0   | 0 | 0 | 0 | 0 | 0 | 0  |   |
| M02255_77_000000000-ADUT3_1_1107_3904_10302 | T---AC--GG-AG-GGA-----GCT-A-G-----C-G-T--T--GT-T-CGG-AA-----TT-A-C-T--GG-GC-----GT-A----AA-GC-GT-AC-----G-TA-G-G-C-G-----G--T-TA-T-T-C-----AA-  | ---                                                                                                                                                                                                                   | G-T-C-A-----G-A-G--G--TG--A-AA-GC--C-T-GG-A-G----CT-C-AA-----C-T-C-C-A-G-A--A-C---T-G--C-C---T-T-----T--GA-A-A--C-----T-A-G-AT--A-G-C---T-A-G-A-A-T-C---T-TG----                                     | GA-G-A-----G-G-T-G--AG-T-----GG-A--ATT---C-C-G-A- | GT--GT-A-G-AG-GT--G--A-A-A---TT-C-GT-AG--AT-A-TT--C-G--G-A-A-G-A-AC-A-CC--AG--T-G--GC-GAA-G--G-C-G-----A-C-T-C-A--CTG--G--AC-A-A-----G-T--A-T-T-GA--CG-C-T-G--A-GG--T-A-CG-A-AA-G-C--G-TG--GG-G--AG-C- | A-AA-----CA--GG | Bacteria(100);Proteobacteria(100);Alphaproteobacteria(100);Sphingomonadales(100);unclassified(100);unclassified(100);unclassified(100);unclassified(100);unclassified(100); |   |   |   |   |   |   |   |   |   |   |   |   |   |     |   |   |   |   |   |    |   |
| Otu0716                                     | 0                                                                                                                                               | 0                                                                                                                                                                                                                     | 0                                                                                                                                                                                                    | 0                                                 | 0                                                                                                                                                                                                      | 0               | 0                                                                                                                                                                           | 0 | 0 | 0 | 0 | 0 | 0 | 0 | 0 | 0 | 0 | 0 | 0 | 0 | 0   | 0 | 0 | 0 | 0 | 0 | 0  |   |
|                                             | 0                                                                                                                                               | 0                                                                                                                                                                                                                     | 0                                                                                                                                                                                                    | 0                                                 | 0                                                                                                                                                                                                      | 0               | 0                                                                                                                                                                           | 0 | 0 | 0 | 0 | 0 | 0 | 0 | 0 | 0 | 0 | 0 | 0 | 0 | 0   | 0 | 0 | 0 | 0 | 0 | 0  |   |
|                                             | 0                                                                                                                                               | 0                                                                                                                                                                                                                     | 0                                                                                                                                                                                                    | 0                                                 | 0                                                                                                                                                                                                      | 0               | 0                                                                                                                                                                           | 0 | 0 | 0 | 0 | 0 | 0 | 0 | 0 | 0 | 0 | 0 | 0 | 0 | 0   | 0 | 0 | 0 | 0 | 0 | 0  |   |
|                                             | 0                                                                                                                                               | 0                                                                                                                                                                                                                     | 0                                                                                                                                                                                                    | 0                                                 | 0                                                                                                                                                                                                      | 0               | 0                                                                                                                                                                           | 0 | 0 | 0 | 0 | 0 | 0 | 0 | 0 | 0 | 0 | 0 | 0 | 0 | 131 | 6 | 0 | 5 | 0 | 0 | 0  |   |
| M02255_76_000000000-ADUNE_1_2104_4629_10581 | .....AC---T-AC-GT-----GCC-A-G-----C-A-G--C--CG-C-GGT-AA-----TA-C--G-T-AG-GT-----GG-C---AA-GC-G-TT-----G---T-C-C-G-----G--T-CC-G-T-T-----AA---G- | T-C-T-----G-A-T--G--TG--A-AA-GC--C-C-CC-G-G----CT-C-AA-----C-C-G-G-G-G-A--G-----G-GT-C-A--T-T-----G--GA-A-A--C-----T--G-G--CG--A-A-C---T-T-G-A-G-T--G--C-AG---AA-G-A-----G-G-A-G--AG-T-----GG--A--ATT---C-C-A-T-GT--  | GT-A-G-CG-GT--G--A-A-A---TG-C-GT-AG--AT-A-TA--T-G--G-A-G-G-A-AC-A-CC--AG--T-G--GC-GAA-G--G-C-G-----G-C-T-C-T--CTG--G--TC-T-G-----T-A--A-C-T-GA--CG-C-T-G--A-GG--C-T-CG-A-AA-G-C--G-TG--GG-T--AG-C-A- | AA-----CA--GG                                     | Bacteria(100);Firmicutes(100);Bacilli(100);unclassified(85);unclassified(85);unclassified(85);unclassified(85);unclassified(85);unclassified(85);                                                      |                 |                                                                                                                                                                             |   |   |   |   |   |   |   |   |   |   |   |   |   |     |   |   |   |   |   |    |   |
| Otu0717                                     | 0                                                                                                                                               | 0                                                                                                                                                                                                                     | 0                                                                                                                                                                                                    | 0                                                 | 0                                                                                                                                                                                                      | 0               | 0                                                                                                                                                                           | 0 | 0 | 0 | 0 | 0 | 0 | 1 | 0 | 0 | 0 | 0 | 0 | 0 | 2   | 0 | 0 | 0 | 3 | 2 | 0  | 0 |
|                                             | 0                                                                                                                                               | 0                                                                                                                                                                                                                     | 0                                                                                                                                                                                                    | 0                                                 | 0                                                                                                                                                                                                      | 0               | 0                                                                                                                                                                           | 0 | 0 | 1 | 1 | 0 | 0 | 0 | 0 | 1 | 0 | 0 | 0 | 1 | 0   | 0 | 0 | 0 | 0 | 0 | 0  |   |
|                                             | 0                                                                                                                                               | 0                                                                                                                                                                                                                     | 0                                                                                                                                                                                                    | 0                                                 | 0                                                                                                                                                                                                      | 0               | 0                                                                                                                                                                           | 0 | 0 | 0 | 0 | 0 | 0 | 0 | 0 | 0 | 0 | 0 | 0 | 0 | 0   | 1 | 0 | 0 | 0 | 0 | 0  |   |
|                                             | 3                                                                                                                                               | 0                                                                                                                                                                                                                     | 0                                                                                                                                                                                                    | 0                                                 | 0                                                                                                                                                                                                      | 0               | 0                                                                                                                                                                           | 0 | 0 | 0 | 0 | 0 | 0 | 0 | 0 | 0 | 0 | 0 | 0 | 0 | 0   | 0 | 0 | 0 | 0 | 0 | 0  |   |
| M02255_76_000000000-ADUNE_1_2114_21549_9896 | G---AA--GA-AG-CAC-----CGG-C-T-----A-A-C---T--CC-G-TGC-CA-----GC-A-G-C--CG-CG-----GT-A----AT-AC-GG-AG-----G-GT-G-C-G-A-----G--C-GT-T-A-A-----    | TC---G-G-A-A-----G-A-T--G--TG--A-AA-GC--C-C-GG-G-G----CT-C-AA-----C-C-T-C-G-G-A--A-C---A-G--C-A--T-T-----T--TG-A-A--C-----T--G-G--CA--G-A-C---T-A-G-A-G-T-C---T-TG---TA-G-A-----G-G-G-G--GG-T-----AG--A--ATT---T-C-A- | G-GT--GT-A-G-CG-GT--G--A-A-A---TG-C-GT-AG--AG-A-TC--T-G--A-A-G-G-A-AT-A-CC--GG--T-G--GC-GAA-G--G-C-G-----G-C-C-C-C--CTG--G--AC-A-A-----A-G--A-C-T-GA--CG-C-T-C--A-GA--T-G-CG-A-AA-G-C--G-TG--GG-G--  | AG-C-A-AA-----CA--GG                              | Bacteria(100);Proteobacteria(100);Gammaproteobacteria(100);Vibrionales(100);Vibrionaceae(100);unclassified(100);unclassified(100);unclassified(100);unclassified(100);                                 |                 |                                                                                                                                                                             |   |   |   |   |   |   |   |   |   |   |   |   |   |     |   |   |   |   |   |    |   |
| Otu0718                                     | 0                                                                                                                                               | 0                                                                                                                                                                                                                     | 0                                                                                                                                                                                                    | 0                                                 | 0                                                                                                                                                                                                      | 0               | 0                                                                                                                                                                           | 0 | 0 | 0 | 0 | 0 | 0 | 0 | 0 | 0 | 0 | 0 | 0 | 4 | 0   | 0 | 5 | 0 | 0 | 0 | 0  |   |
|                                             | 0                                                                                                                                               | 0                                                                                                                                                                                                                     | 0                                                                                                                                                                                                    | 0                                                 | 0                                                                                                                                                                                                      | 0               | 0                                                                                                                                                                           | 0 | 0 | 0 | 0 | 0 | 0 | 3 | 0 | 0 | 0 | 0 | 0 | 0 | 0   | 0 | 0 | 0 | 0 | 0 | 0  |   |
|                                             | 0                                                                                                                                               | 0                                                                                                                                                                                                                     | 0                                                                                                                                                                                                    | 0                                                 | 0                                                                                                                                                                                                      | 0               | 0                                                                                                                                                                           | 0 | 0 | 0 | 0 | 0 | 0 | 0 | 0 | 0 | 0 | 0 | 0 | 0 | 0   | 0 | 0 | 0 | 0 | 0 | 24 |   |
|                                             | 0                                                                                                                                               | 0                                                                                                                                                                                                                     | 17                                                                                                                                                                                                   | 0                                                 | 0                                                                                                                                                                                                      | 0               | 0                                                                                                                                                                           | 0 | 0 | 0 | 0 | 0 | 0 | 0 | 0 | 0 | 0 | 0 | 0 | 0 | 0   | 0 | 0 | 0 | 0 | 0 | 0  |   |
| M02255_77_000000000-ADUT3_1_1108_24720_4276 | T---AC--GT-AG-GGG-----TCG-A-G-----C-G-T--T--GT-C-CGG-                                                                                           |                                                                                                                                                                                                                       |                                                                                                                                                                                                      |                                                   |                                                                                                                                                                                                        |                 |                                                                                                                                                                             |   |   |   |   |   |   |   |   |   |   |   |   |   |     |   |   |   |   |   |    |   |



Otu0720 0 35 0 0 0 0 14 0 9 0 0 0 0 0 0 0 0 0 0 0 0 0 0 0 0 0 0 0  
0 0 0 0 0 0 0 0 0 0 0 0 0 0 0 0 0 0 0 0 0 0 0 0 0 0 0 0  
0 0 0 0 0 0 0 0 0 0 0 0 0 0 0 0 0 0 0 0 3 0 0 0 0 0 0 0  
0 0 0 0 0 0 0 0 0 0 0 0 0 0 0 0 0 0 0 0 0 0 0 0 0 0 0  
M02255\_76\_000000000-ADUNE\_1\_1117\_8307\_6013 T---AC---GT-AG-GGA-----GCA-A-G-----C--G--T---T--AT-C-CGG-AT-----TT-A--C-T--GG-GT-----GT--A---AA---G--G-----G-C---G-C-----G-C-----AA---G-T-  
T-G-----G-A-A--G--TG--A-AA-TC--T-A-TG-G-G----CT-T-AA-----C-C-C-A-T-A-A-A-C---T-G--C-T---T-T-----C--AA-A-A--C-----T--G-C--TG--G-T-C---T-T-G-A-G-T--G---A-TG----GA-G-A-----G-G-C-A--GG-C-----GG--A--ATT---C-C-G-T-GT--GT-  
A-G-CG-GT--G---A--A-A--TG-C-GT-AG--AT-A-TA--C-G--G-A-G-G-A-AC-A-CC--AG--T--G--GC-GAA-G--G-C--G-----G--C-C-T-G---CTG--G--AC-A-T-----T-A---A-C-T--GA--CG-C-T-G--A-GG--C-G-CG-A-AA-G-C---G-TG--GG-G--AG-C-A-AA--  
-----CA--GG Bacteria(100);Firmicutes(100);Clostridia(100);Clostridiales(100);Ruminococcaceae(100);Incertae\_Sedis(100);unclassified(100);unclassified(100);unclassified(100);

Otu0721 0 0 0 0 0 0 1 20 0 0 0 0 0 0 0 0 0 0 0 0 0 0 0 0 0 0 0 0  
0 0 0 0 0 0 0 0 0 0 0 0 0 0 0 0 0 0 0 0 0 0 0 0 0 2 0 13 0  
0 0 0 0 0 0 0 0 0 0 0 0 0 0 0 0 0 2 0 0 0 0 0 0 0 0 0 27 0  
0 0 0 13 0 0 0 0 0 0 0 0 0 0 0 0 0 17 0 0 0 0 0 0 0 0 0 0  
M02255\_76\_000000000-ADUNE\_1\_1102\_9679\_13523 T---GG---CT-A--ACT-----ACG-T-G-----C--C--A--G--CA-G-CCG-CG-----GT-A--A-T--AC-GT-----AG--A---TG-GC-AA-GC-----G-TT-GTC-C-G-----G--T-TC-T-T-T-----AA---  
-G-T-C-T-----G-A-T--G--TG--A-AA-GC--C-C-CT-G-G----CT-T-AA-----C-C-A-G-G-G-A--G-----G-GT-C-A--T-T-----G--GA-A-A--C-----T--G-G--AG--A-A-C---T-T-G-A-G-T--G---C-AG-----AA-G-A-----G-G-A-A--AG-T-----GG--A--ATT---C-C-A-T-  
GT--GT-A-G-CG-GT--G---A--A-A--TG-C-GT-AG--AT-A-TA--T-G--G-A-G-G-A-AC-A-CC--AG--T--G--GC-GAA-G--G-C--G-----A--C-T-T-T--CTG--G--TC-T-G-----T-A---A-C-T--GA--CG-C-T-G--A-GG--C-T-CG-A-AA-G-C---A-TG--GG-G--AG-C-  
A-AA-----CA--GG Bacteria(100);Firmicutes(100);Bacilli(100);Lactobacillales(100);Carnobacteriaceae(100);Desemzia(100);unclassified(100);unclassified(100);unclassified(100);

Otu0722 0 0 0 0 0 12 0 0 0 0 0 0 0 0 0 0 0 0 0 0 0 0 0 0 0 0 0 0 25  
10 0 0 0 0 0 0 0 0 0 67 24 0 0 0 0 18 0 0 0 0 0 0 0 0 16 0 0 0  
0 0 0 0 0 0 0 0 0 0 0 0 0 0 3 0 5 0 0 0 0 0 0 0 0 0 0 0 60  
25 0 0 0 0 0 0 0 0 0 0 0 0 0 0 0 0 0 0 0 0 0 0 0 0 0 0 0  
M02255\_77\_000000000-ADUT3\_1\_1118\_20060\_18242 T---AC---GG-AG-GGG-----GTT-A-G-----C--G--T---T--GT-T-CGG-AA-----TG-A--C-T--GG-GC-----GT--A---AA-GC-GC-GC-----G-TA-G-G-C-G-----G--G-CT-G-G-A---  
-----AA---G-T-C-A-----G-A-G--G--TG--A-AA-GC--C-C-GG-G-G----CT-C-AA-----C-C-C-C-G-G-A--A-T---G-G--C-C---T-T-----T--GA-A-A--C-----T--C-C--CA-G-C-C---T-T-G-A-G-T--T---C-GA---GA-G-A-----G-G-T-G--AG-T-----GG--A--ATT---  
C-C-G-A-GT--GT-A-G-AG-GT--G---A--A-A--TT-C-GT-AG--AT-A-TT--C-G--G-A-G-G-A-AC-A-CC--AG--T--G--GC-GAA-G--G-C--G-----G--C-T-C-A--CTG--G--CT-C-G-----A-C---A-C-T--GA--CG-C-T-G--A-GG--T-G-CG-A-AA-G-C---G-TG--GG-  
G--AG-C-A-AA-----CA--GG Bacteria(100);Proteobacteria(100);Alphaproteobacteria(100);Rhodobacterales(100);Rhodobacteraceae(100);unclassified(100);unclassified(100);unclassified(100);unclassified(100);

Otu0723 0 0 0 0 0 0 0 0 0 0 0 0 0 0 0 0 0 0 0 0 0 0 0 0 0 0 0 0  
0 0 0 0 0 0 0 0 0 0 0 0 0 0 0 0 0 0 0 0 8 0 0 0 0 0 0 0  
0 0 0 0 0 0 0 0 0 0 0 0 0 0 0 0 0 0 0 0 0 0 0 0 0 0 0 0  
0 0 0 0 0 0 0 0 0 0 0 0 0 0 0 0 0 0 0 0 10 0 0 0 0 0 0  
M02255\_77\_000000000-ADUT3\_1\_2115\_26550\_11434 T---AC---GT-AG-GGG-----CCG-A-G-----C--G--T---T--GT-T-CGG-AG-----TT-A--C-T--GG-GC-----GT--A---AA-GC-GT-GC-----G-CA-G-G-C-G-----G--C-GC-G-T-T---  
-----CT---G-C-C-C-----G-G-C--G--TG--A-AA-GC--C-C-CC-G-G----CT-C-AA-----C-C-G-G-G-G-A--A-C---G-T--C-G---T-C-----G--GG-G-A--C-----G--G-G--CG--C-G-C---T-T-G-A-G-G--G---C-GG---CA-G-G-----G-G-C-T---GG-T-----GG--A--ACT---  
---CCC-G-GT--GT-A-G-TG-GT--G---A--A-A--TG-C-GT-AG--AG-A-TC--G-G--G-A-A-G-A-AC-A-CC--TG--T--G--GC-GAA-G--G-C--G-----G--C-C-A-G---CTG--G--GC-C-G-----G-C---C-C-T--GA--CG-C-T-G--A-GG--C-A-CG-A--AG-G-C---G-TG--  
GG-G--AG-C-G-AA-----CG--GG Bacteria(100);Chloroflexi(100);Thermomicrobia(100);JG30-KF-CM45(100);unclassified(100);unclassified(100);unclassified(100);unclassified(100);unclassified(100);

Otu0724 0 0 0 0 0 0 0 0 0 0 0 0 0 0 0 0 0 0 0 0 0 0 0 0 0 0 0 0  
0 0 0 0 0 0 0 0 0 0 0 0 0 0 0 0 0 0 0 0 0 0 0 0 0 0 0 0  
0 0 0 0 0 0 0 0 0 0 0 0 0 0 0 0 0 0 0 0 0 0 0 0 0 0 0 0  
0 46 0 0 0 0 0 0 0 0 0 0 0 0 0 0 0 0 0 0 38 0 0 0 0 0  
M02255\_77\_000000000-ADUT3\_1\_2113\_20797\_20817 T---AC---GA-AG-GGG-----GCT-A-G-----C--G--T---T--GT-T-CGG-AA-----TT-A--C-T--GG-GC-----GT--A---AA-GC-GC-AC-----G-TA-G-G-C-G-----G--A-TT-G-G-T-----  
-----CA---G-T-T-A-----G-G-G--G--TG--A-AA-TC--C-C-GG-A-G----CT-C-AA-----C-T-C-C-G-G-A--A-C---T-G--C-C---T-T-----T--AA-T-A--C-----T--G-C--CA--G-T-C---T-A-G-A-G-A--C---C-GA---GA-G-A-----G-G-T-A--AG-T-----GG--A--ACT---C-  
C-T-A-GT--GT-A-G-AG-GT--G---G--A-A--TT-C-GT-AG--AT-A-TT--A-G--G-A-A-G-A-AC-A-CC--AG--T--G--GC-GAA-G--G-C--G-----G--C-T-T-A--CTG--G--CT-C-G-----G-A---A-C-T--GA--CG-C-T-G--A-GG--T-G-CG-A-AA-G-C---G-TG--GG-  
G--AG-C-A-AA-----CA--GG Bacteria(100);Proteobacteria(100);Alphaproteobacteria(100);Rhizobiales(100);Hyphomicrobiaceae(100);Devosia(100);unclassified(100);unclassified(100);unclassified(100);



|         |                                                                                                                                                                                                                                                                                                                                                                                                                                                                                                                                                                                                                                                                                                                                                                                                                       |   |   |   |   |   |   |   |   |   |   |   |   |   |    |   |    |   |   |   |   |   |   |   |   |    |   |  |
|---------|-----------------------------------------------------------------------------------------------------------------------------------------------------------------------------------------------------------------------------------------------------------------------------------------------------------------------------------------------------------------------------------------------------------------------------------------------------------------------------------------------------------------------------------------------------------------------------------------------------------------------------------------------------------------------------------------------------------------------------------------------------------------------------------------------------------------------|---|---|---|---|---|---|---|---|---|---|---|---|---|----|---|----|---|---|---|---|---|---|---|---|----|---|--|
| Otu0725 | 0                                                                                                                                                                                                                                                                                                                                                                                                                                                                                                                                                                                                                                                                                                                                                                                                                     | 0 | 0 | 0 | 0 | 0 | 0 | 0 | 0 | 0 | 0 | 0 | 0 | 0 | 0  | 0 | 0  | 0 | 0 | 0 | 0 | 0 | 0 | 0 | 0 | 0  | 0 |  |
|         | 0                                                                                                                                                                                                                                                                                                                                                                                                                                                                                                                                                                                                                                                                                                                                                                                                                     | 0 | 0 | 0 | 0 | 0 | 0 | 0 | 0 | 0 | 0 | 0 | 0 | 0 | 0  | 0 | 0  | 0 | 0 | 0 | 0 | 0 | 0 | 0 | 0 | 0  | 0 |  |
|         | 0                                                                                                                                                                                                                                                                                                                                                                                                                                                                                                                                                                                                                                                                                                                                                                                                                     | 0 | 0 | 0 | 0 | 0 | 0 | 0 | 0 | 0 | 0 | 0 | 0 | 0 | 0  | 0 | 35 | 0 | 0 | 0 | 0 | 0 | 0 | 0 | 0 | 0  | 0 |  |
|         | 0                                                                                                                                                                                                                                                                                                                                                                                                                                                                                                                                                                                                                                                                                                                                                                                                                     | 0 | 0 | 0 | 0 | 0 | 4 | 0 | 0 | 0 | 0 | 0 | 0 | 0 | 0  | 0 | 0  | 0 | 0 | 0 | 0 | 0 | 0 | 0 | 0 | 0  | 0 |  |
|         | M02255_77_000000000-ADUT3_1_2114_17653_20849 T---AC--GT-AG-GGG-----GCG-A-G-----C-G-T--T-GT-C-CGT-AT-----TT-A--T-T-GG-GC-----GT-A----AA-GG-GT-TC-----G-CA-G-G-T-G-----G-C-CT-G-T-T-----AA---G-T-C-A-----G-A-T--G-TG--A-AA-GA--T-C-AC-A-G----CT-C-AA-----C-T-G-T-G-G-T-A-----A-G--C-A--T-T-----T-GA-A-A--C-----T-G-A-AA--G-G-C---T-T-G-A-G-T-T--A-AG----GA-G-A-----G-G-A-A--AG-T-----GG-A-ATT---C-T-A-GT--GT-A-G-CG-GT--G---A-A-A---TG-C-GT-AG--AT-A-TT--A-G--G-A-G-G-A-AT-A-CC--AG--T-G--GC-GAA-G--G-C-G-----A-C-T-T-T---CTG-G--AC-T-T-----A-T--A-C-T-GA--CA-C-T-G--A-GG--A-A-CG-A-AA-G-C---G-TG--GG-G--AG-C-A-AA-----CA--GG Bacteria(100);Firmicutes(100);Clostridia(100);Clostridiales(100);unclassified(90);unclassified(90);unclassified(90);unclassified(90);unclassified(90);                                    |   |   |   |   |   |   |   |   |   |   |   |   |   |    |   |    |   |   |   |   |   |   |   |   |    |   |  |
| Otu0726 | 0                                                                                                                                                                                                                                                                                                                                                                                                                                                                                                                                                                                                                                                                                                                                                                                                                     | 0 | 0 | 0 | 0 | 0 | 0 | 0 | 0 | 0 | 0 | 0 | 0 | 0 | 0  | 0 | 0  | 0 | 0 | 0 | 0 | 0 | 0 | 0 | 0 | 0  | 0 |  |
|         | 0                                                                                                                                                                                                                                                                                                                                                                                                                                                                                                                                                                                                                                                                                                                                                                                                                     | 0 | 0 | 0 | 0 | 0 | 0 | 0 | 0 | 0 | 0 | 0 | 0 | 0 | 0  | 0 | 0  | 0 | 0 | 0 | 0 | 0 | 0 | 0 | 0 | 0  | 0 |  |
|         | 0                                                                                                                                                                                                                                                                                                                                                                                                                                                                                                                                                                                                                                                                                                                                                                                                                     | 0 | 0 | 0 | 0 | 0 | 0 | 0 | 0 | 0 | 0 | 0 | 0 | 0 | 0  | 0 | 0  | 0 | 0 | 0 | 0 | 0 | 0 | 0 | 0 | 30 | 0 |  |
|         | 0                                                                                                                                                                                                                                                                                                                                                                                                                                                                                                                                                                                                                                                                                                                                                                                                                     | 0 | 0 | 0 | 0 | 0 | 0 | 0 | 0 | 0 | 0 | 0 | 0 | 0 | 0  | 0 | 0  | 0 | 0 | 0 | 0 | 0 | 0 | 0 | 0 | 0  | 0 |  |
|         | M02255_77_000000000-ADUT3_1_2103_17387_17374 T---AC--GT-AG-GGG-----GCA-A-G-----C-G-T--T-AT-C-CGG-AT-----TT-A--C-T-GG-GT-----GT-A----AA-GG-GA-GC-----G-CA-G-G-C-G-----G--C-GA-G-G-C-----AA---G-T-C-T-----G-A-T--G-TG--A-AA-GC--C-C-GG-G-G----CT-C-AA-----C-C-C-C-G-G-G--A-C---T-G--C-A--T-T-----G--GA-A-A--C-----T-G-T-CT--T-G-C---T-T-G-A-G-T-G--T-CG----GA-G-A-----G-G-T-A--AG-T-----GG-A-ATT---C-C-T-A-GT--GT-A-G-CG-GT--G---A-A-A---TG-C-GT-AG--AT-A-TT--A-G--G-A-G-G-A-AC-A-CC--AG--T-G--GC-GAA-G--G-C-G-----G-C-T-T-A---CTG-G--AC-G-A-----C-A--A-C-T-GA--CG-C-T-G--A-GG--C-T-CG-A-AA-G-C---G-TG--GG-G--AG-C-A-AA-----CA--GG Bacteria(100);Firmicutes(100);Clostridia(100);Clostridiales(100);Lachnospiraceae(100);unclassified(100);unclassified(100);unclassified(100);unclassified(100);                       |   |   |   |   |   |   |   |   |   |   |   |   |   |    |   |    |   |   |   |   |   |   |   |   |    |   |  |
| Otu0727 | 0                                                                                                                                                                                                                                                                                                                                                                                                                                                                                                                                                                                                                                                                                                                                                                                                                     | 0 | 0 | 0 | 0 | 0 | 0 | 0 | 0 | 0 | 0 | 0 | 0 | 0 | 0  | 0 | 0  | 0 | 0 | 0 | 0 | 0 | 0 | 0 | 0 | 0  | 0 |  |
|         | 0                                                                                                                                                                                                                                                                                                                                                                                                                                                                                                                                                                                                                                                                                                                                                                                                                     | 0 | 0 | 0 | 0 | 0 | 0 | 0 | 0 | 0 | 0 | 0 | 0 | 0 | 0  | 0 | 0  | 0 | 0 | 0 | 0 | 0 | 0 | 0 | 0 | 0  | 0 |  |
|         | 17                                                                                                                                                                                                                                                                                                                                                                                                                                                                                                                                                                                                                                                                                                                                                                                                                    | 0 | 0 | 0 | 0 | 0 | 0 | 0 | 0 | 0 | 0 | 0 | 0 | 0 | 0  | 0 | 0  | 0 | 0 | 0 | 0 | 0 | 0 | 0 | 0 | 60 | 1 |  |
|         | 0                                                                                                                                                                                                                                                                                                                                                                                                                                                                                                                                                                                                                                                                                                                                                                                                                     | 0 | 0 | 0 | 0 | 0 | 0 | 0 | 0 | 0 | 0 | 0 | 0 | 0 | 0  | 0 | 0  | 0 | 0 | 0 | 0 | 0 | 0 | 0 | 0 | 0  | 0 |  |
|         | M02255_77_000000000-ADUT3_1_1101_12180_17483 T---AC--GA-AG-GGG-----GCT-A-G-----C-G-T--T-GT-T-CGG-AA-----TT-A--C-T-GG-GC-----GT-A----AA-GC-GC-AC-----G-CA-G-G-C-G-----G--T-CC-G-A-T-----TA---G-T-C-A-----G-A-A--G-TG--A-AA-GC--C-C-CG-G-G----CT-C-AA-----C-C-T-G-G-G-A--A-C---T-G--C-T--T-T-----T-GA-T-A--C-----T-G-T-CG--G-G-C---T-T-G-A-A-T--C--A-CG----GA-G-A-----G-G-G-T--AG-T-----GG-A-ATT---C-C-G-A-GT--GT-A-G-AG-GT--G---A-A-A---TT-C-GT-AG--AT-A-TT--C-G--G-A-A-G-A-AC-A-CC--AG--T-G--GC-GAA-G--G-C-G-----A-C-T-A-C---CTG-G--CC-G-T-----C-G--A-T-T-GA--CG-C-T-C--A-TG--T-G-CG-A-AA-G-C---G-TG--GG-G--AG-C-A-AA-----CA--GG Bacteria(100);Proteobacteria(100);Alphaproteobacteria(100);Rhodospirillales(100);Rhodospirillaceae(100);Magnetospirillum(100);unclassified(100);unclassified(100);unclassified(100); |   |   |   |   |   |   |   |   |   |   |   |   |   |    |   |    |   |   |   |   |   |   |   |   |    |   |  |
| Otu0728 | 0                                                                                                                                                                                                                                                                                                                                                                                                                                                                                                                                                                                                                                                                                                                                                                                                                     | 0 | 0 | 0 | 0 | 0 | 0 | 0 | 0 | 0 | 0 | 0 | 0 | 0 | 0  | 0 | 0  | 0 | 0 | 0 | 0 | 0 | 0 | 0 | 0 | 0  | 0 |  |
|         | 0                                                                                                                                                                                                                                                                                                                                                                                                                                                                                                                                                                                                                                                                                                                                                                                                                     | 0 | 0 | 0 | 0 | 0 | 0 | 0 | 0 | 0 | 0 | 0 | 0 | 0 | 0  | 0 | 0  | 0 | 0 | 0 | 0 | 0 | 0 | 0 | 0 | 0  | 0 |  |
|         | 0                                                                                                                                                                                                                                                                                                                                                                                                                                                                                                                                                                                                                                                                                                                                                                                                                     | 0 | 0 | 0 | 0 | 0 | 0 | 0 | 0 | 0 | 0 | 0 | 0 | 0 | 0  | 0 | 16 | 0 | 0 | 0 | 0 | 0 | 0 | 0 | 0 | 0  | 0 |  |
|         | 0                                                                                                                                                                                                                                                                                                                                                                                                                                                                                                                                                                                                                                                                                                                                                                                                                     | 0 | 0 | 0 | 0 | 0 | 0 | 0 | 0 | 0 | 0 | 0 | 0 | 0 | 19 | 0 | 0  | 0 | 0 | 0 | 0 | 0 | 0 | 0 | 0 | 0  | 0 |  |
|         | M02255_76_000000000-ADUNE_1_1106_20003_9249 C---TA---AC-TA-CGT-----GCC-A-G-----C-A-G---C-CG-C-GGT-AA-----TA-C--G-T--AG-GG-----GG-C----AA-GC-G--TT-----G-TC-C-G---G-----A-T-TA-G-G                                                                                                                                                                                                                                                                                                                                                                                                                                                                                                                                                                                                                                     |   |   |   |   |   |   |   |   |   |   |   |   |   |    |   |    |   |   |   |   |   |   |   |   |    |   |  |



|                                                                                                                                                                                                                              |   |    |     |   |   |   |    |    |     |                                                                                                                                                                                                                   |   |    |   |    |   |   |   |   |   |   |    |   |   |    |   |     |   |  |
|------------------------------------------------------------------------------------------------------------------------------------------------------------------------------------------------------------------------------|---|----|-----|---|---|---|----|----|-----|-------------------------------------------------------------------------------------------------------------------------------------------------------------------------------------------------------------------|---|----|---|----|---|---|---|---|---|---|----|---|---|----|---|-----|---|--|
| Otu0730                                                                                                                                                                                                                      | 0 | 73 | 150 | 0 | 0 | 0 | 77 | 11 | 59  | 0                                                                                                                                                                                                                 | 0 | 0  | 0 | 0  | 0 | 0 | 0 | 0 | 0 | 0 | 0  | 0 | 0 | 0  | 0 | 0   | 0 |  |
|                                                                                                                                                                                                                              | 0 | 0  | 0   | 0 | 0 | 7 | 0  | 0  | 0   | 0                                                                                                                                                                                                                 | 0 | 49 | 0 | 0  | 0 | 3 | 0 | 0 | 0 | 0 | 0  | 0 | 0 | 0  | 1 | 0   | 0 |  |
|                                                                                                                                                                                                                              | 0 | 0  | 0   | 0 | 0 | 0 | 0  | 0  | 0   | 0                                                                                                                                                                                                                 | 0 | 0  | 0 | 0  | 0 | 3 | 9 | 0 | 0 | 0 | 0  | 0 | 0 | 0  | 0 | 0   | 0 |  |
|                                                                                                                                                                                                                              | 0 | 0  | 0   | 0 | 0 | 0 | 2  | 0  | 0   | 0                                                                                                                                                                                                                 | 0 | 1  | 0 | 0  | 0 | 0 | 0 | 0 | 0 | 0 | 13 | 0 | 0 | 95 | 0 | 0   |   |  |
| M02255_76_000000000-ADUNE_1_2112_11984_23285                                                                                                                                                                                 |   |    |     |   |   |   |    |    |     | T---AC---GT-AG-GGA-----GCG-A-G-----C--G--T---T--GT-C-CGG-AA-----TT-A--C-T--GG-GT-----GT--A---AA---G-G-----G--A--G-C-----G---T-----                                                                                |   |    |   |    |   |   |   |   |   |   |    |   |   |    |   |     |   |  |
| AA---G-T-C-A-----G-A-T--G--TG--A-AA-AC--T-A-TG-G-G----CT-T-AA-----C-C-C-A-T-A-A--A-C---T-G--C-A---T-T-----T--GA-A-A---C-----T--G-T--GG--T-T-C---T-T-G-A-G-T--G---A-AG---TA-G-A-----G-G-T-A---AG-C-----GG--A--ATT---C-C-T-    |   |    |     |   |   |   |    |    |     | A-GT--GT-A-G-CG-GT--G---A--A-A---TG-C-GT-AG--AT-A-TT--A-G--G-A-G-G-A-AC-A-TC---AG--T--G--GC-GAA-G--G-C--G-----G--C-T-T-A---CTG--G--GC-T-T-----T-A---A-C-T--GA--CG-C-T-G--A-GG--C-T-CG-A--AA-G-C---G-TG--GG-G--AG- |   |    |   |    |   |   |   |   |   |   |    |   |   |    |   |     |   |  |
| C-A-AA-----CA--GG                                                                                                                                                                                                            |   |    |     |   |   |   |    |    |     | Bacteria(100);Firmicutes(100);Clostridia(100);Clostridiales(100);Ruminococcaceae(100);unclassified(70);unclassified(70);unclassified(70);unclassified(70);                                                        |   |    |   |    |   |   |   |   |   |   |    |   |   |    |   |     |   |  |
| Otu0731                                                                                                                                                                                                                      | 0 | 0  | 0   | 0 | 0 | 0 | 0  | 0  | 0   | 0                                                                                                                                                                                                                 | 0 | 0  | 0 | 0  | 0 | 0 | 3 | 0 | 0 | 0 | 0  | 0 | 0 | 0  | 0 | 0   | 0 |  |
|                                                                                                                                                                                                                              | 0 | 0  | 0   | 0 | 0 | 0 | 0  | 0  | 0   | 0                                                                                                                                                                                                                 | 0 | 0  | 0 | 0  | 0 | 0 | 0 | 0 | 0 | 0 | 0  | 0 | 0 | 0  | 0 | 0   | 0 |  |
|                                                                                                                                                                                                                              | 0 | 0  | 0   | 0 | 0 | 0 | 0  | 0  | 0   | 0                                                                                                                                                                                                                 | 0 | 0  | 0 | 0  | 0 | 0 | 0 | 0 | 0 | 0 | 0  | 0 | 0 | 9  | 0 | 0   | 0 |  |
|                                                                                                                                                                                                                              | 0 | 0  | 0   | 0 | 0 | 0 | 0  | 0  | 0   | 0                                                                                                                                                                                                                 | 0 | 0  | 0 | 0  | 0 | 0 | 0 | 0 | 0 | 0 | 0  | 7 | 0 | 0  | 0 | 0   |   |  |
| M02255_77_000000000-ADUT3_1_1115_11387_16571                                                                                                                                                                                 |   |    |     |   |   |   |    |    |     | T---AC---GT-AG-GGT-----GCA-A-G-----C--G--T---T--GT-C-CGG-AA-----TT-A--T-T--GG-GC-----GT--A---AA-GA-GC-TC-----G-TA-G-G-C-G-----G--T-GT-G-T-C-----                                                                  |   |    |   |    |   |   |   |   |   |   |    |   |   |    |   |     |   |  |
| -----GC---G-T-C-T-----G-C-T--G--TG--A-AA-AC--T-C-AG-G-G----CT-C-AA-----C-T-C-T-G-A-G--C-T---T-G--C-A---G-T-----G--GG-T-A---C-----G--G-G--CA-C-A-C---T-A-G-A-G-T--G---C-TG---TA-G-G-----G-G-A-G---AC-T-----GG--A--ATT---C-    |   |    |     |   |   |   |    |    |     | C-T-G-GT--GT-A-G-CG-GT--G---A--A-A---TG-C-GC-AG--AT-A-TC--A-G--G-A-G-G-A-AC-A-CC--GG--T--G--GC-GAA-G--G-C--G-----G--G-T-C-T---CTG--G--GC-A-G-----T-T---A-C-T--GA--CG-C-T-G--A-GG--A-G-CG-A--AA-G-C---A-TG--GG-    |   |    |   |    |   |   |   |   |   |   |    |   |   |    |   |     |   |  |
| G--AG-C-G-AA-----CA--GG                                                                                                                                                                                                      |   |    |     |   |   |   |    |    |     | Bacteria(100);Actinobacteria(100);Actinobacteria(100);Actinobacteridae(100);Actinomycetales(100);Kineosporiineae(100);Kineosporiaceae(100);Kineococcus(100);unclassified(100);                                    |   |    |   |    |   |   |   |   |   |   |    |   |   |    |   |     |   |  |
| Otu0732                                                                                                                                                                                                                      | 0 | 0  | 0   | 0 | 0 | 0 | 0  | 0  | 0   | 0                                                                                                                                                                                                                 | 0 | 0  | 0 | 0  | 0 | 0 | 0 | 0 | 0 | 0 | 0  | 0 | 0 | 0  | 0 | 0   | 0 |  |
|                                                                                                                                                                                                                              | 0 | 0  | 0   | 0 | 0 | 0 | 0  | 0  | 0   | 0                                                                                                                                                                                                                 | 0 | 0  | 0 | 0  | 0 | 0 | 0 | 0 | 0 | 0 | 0  | 0 | 0 | 0  | 0 | 0   | 0 |  |
|                                                                                                                                                                                                                              | 0 | 0  | 0   | 0 | 0 | 0 | 0  | 0  | 0   | 0                                                                                                                                                                                                                 | 0 | 0  | 0 | 32 | 0 | 0 | 0 | 0 | 0 | 0 | 0  | 0 | 0 | 0  | 0 | 0   | 0 |  |
|                                                                                                                                                                                                                              | 0 | 0  | 0   | 0 | 0 | 0 | 0  | 0  | 0   | 0                                                                                                                                                                                                                 | 0 | 0  | 6 | 0  | 0 | 0 | 0 | 0 | 0 | 0 | 0  | 0 | 0 | 0  | 0 | 0   |   |  |
| M02255_76_000000000-ADUNE_1_1119_23344_14748                                                                                                                                                                                 |   |    |     |   |   |   |    |    |     | C---TA---AC-TC-TGT-----GCC-A-G-----C---A--G--CC-G-CGG-TA-----AT-A--C-A--GA-GG-----GT-----GC-TA-GC-G-----T-TA-A-T-C-G-----G--A-TT-G-T-T-----                                                                       |   |    |   |    |   |   |   |   |   |   |    |   |   |    |   |     |   |  |
| --AA---G-T-C-G-----G-T-T--G--TG--A-AA-GC--C-C-CG-G-G----CT-C-AA-----C-C-T-G-G-G-A--A-T---T-G--C-A---G-T-----C--GA-T-A---C-----T--G-G--CA-G-A-C---T-A-G-A-G-A--A--C-GG---TA-G-A-----G-G-G-A---GG-C-----GG--A--ACT---C-        |   |    |     |   |   |   |    |    |     | C-A-G-GT--GT-A-G-CG-GT--G---A--A-A---TG-C-GT-AG--AT-A-TC--T-G--G-A-A-G-A-AC-A-CC--GA--T--G--GC-GAA-G--G-C--A-----A--C-C-T-C---CTG--G--GC-C-T-----G-T---T-C-T--GA--CG-C-T-G--A-GG--C-A-CG-A--AA-G-C---G-TG--GG-T-  |   |    |   |    |   |   |   |   |   |   |    |   |   |    |   |     |   |  |
| -AG-C-A-AA-----CA--GG                                                                                                                                                                                                        |   |    |     |   |   |   |    |    |     | Bacteria(100);Proteobacteria(100);Gammaproteobacteria(100);Xanthomonadales(100);Sinobacteraceae(100);Nevskia(100);unclassified(100);unclassified(100);unclassified(100);                                          |   |    |   |    |   |   |   |   |   |   |    |   |   |    |   |     |   |  |
| Otu0733                                                                                                                                                                                                                      | 0 | 0  | 0   | 0 | 0 | 0 | 0  | 0  | 0   | 0                                                                                                                                                                                                                 | 0 | 0  | 0 | 0  | 0 | 0 | 0 | 0 | 0 | 0 | 0  | 0 | 0 | 0  | 0 | 0   | 0 |  |
|                                                                                                                                                                                                                              | 0 | 0  | 0   | 0 | 0 | 0 | 0  | 0  | 0   | 0                                                                                                                                                                                                                 | 0 | 0  | 0 | 0  | 0 | 0 | 0 | 0 | 0 | 0 | 0  | 0 | 0 | 0  | 0 | 0   | 0 |  |
|                                                                                                                                                                                                                              | 0 | 0  | 0   | 0 | 0 | 0 | 0  | 0  | 0   | 0                                                                                                                                                                                                                 | 0 | 0  | 0 | 0  | 0 | 7 | 0 | 0 | 0 | 0 | 0  | 0 | 0 | 0  | 0 | 190 | 0 |  |
|                                                                                                                                                                                                                              | 0 | 0  | 0   | 0 | 0 | 0 | 0  | 0  | 0   | 0                                                                                                                                                                                                                 | 0 | 0  | 0 | 0  | 0 | 0 | 0 | 0 | 0 | 0 | 0  | 0 | 0 | 0  | 0 | 10  |   |  |
| M02255_76_000000000-ADUNE_1_1114_24283_9653                                                                                                                                                                                  |   |    |     |   |   |   |    |    |     | T---AC---GA-AG-GGG-----GCT-A-G-----C-G--T---T--GC-T-CGG-AA-----TC-A--C-T--GG-GC-----GT--A---AA-G--G--GC-----G-C-----C-G-----T-----AG---G-T-                                                                       |   |    |   |    |   |   |   |   |   |   |    |   |   |    |   |     |   |  |
| C-G-----G-G-C--G--TG--A-AA-TC--C-C-CG-G-G----CT-C-AA-----C-C-C-G-G-G-G--G-C---T-G--C-G---C--C-----C--GA-G-A---C-----T--G-C--GG--T-G-C---T-C-G-A-G-G--G---C-GG---GA-G-A-----G-G-C-T---CG-C-----GG--A--ATT---C-C-C-A-GT--      |   |    |     |   |   |   |    |    |     | GT-A-G-AG-GT--G---A--A-A---TT-C-GT-AG--AT-A-TT--G-G--G-A-A-G-A-AC-A-CC--GG--T--G--GC-GAA-G--G-C--G-----G--C-G-A-G---CTG--G--CC-C-G-----T-T---T-C-T--GA--CG-C-T-G--A-GG--C-G-CG-A--CA-G-C---G-TA--GG-G--AG-C-A-    |   |    |   |    |   |   |   |   |   |   |    |   |   |    |   |     |   |  |
| AA-----CA--GG                                                                                                                                                                                                                |   |    |     |   |   |   |    |    |     | Bacteria(100);Proteobacteria(100);Alphaproteobacteria(100);Rhodospirillales(100);unclassified(100);unclassified(100);unclassified(100);unclassified(100);unclassified(100);                                       |   |    |   |    |   |   |   |   |   |   |    |   |   |    |   |     |   |  |
| Otu0734                                                                                                                                                                                                                      | 0 | 0  | 101 | 0 | 0 | 0 | 9  | 0  | 169 | 0                                                                                                                                                                                                                 | 0 | 0  | 0 | 0  | 0 | 0 | 0 | 0 | 0 | 0 | 0  | 0 | 0 | 0  | 0 | 0   | 0 |  |
|                                                                                                                                                                                                                              | 0 | 0  | 0   | 0 | 0 | 0 | 0  | 0  | 0   | 0                                                                                                                                                                                                                 | 0 | 0  | 0 | 0  | 0 | 0 | 0 | 0 | 0 | 0 | 0  | 0 | 0 | 0  | 0 | 0   | 0 |  |
|                                                                                                                                                                                                                              | 0 | 0  | 0   | 0 | 0 | 0 | 0  | 0  | 0   | 0                                                                                                                                                                                                                 | 0 | 0  | 0 | 0  | 0 | 0 | 0 | 0 | 0 | 0 | 0  | 0 | 0 | 0  | 0 | 0   | 0 |  |
|                                                                                                                                                                                                                              | 0 | 0  | 0   | 0 | 0 | 0 | 0  | 0  | 0   | 0                                                                                                                                                                                                                 | 0 | 0  | 0 | 0  | 0 | 0 | 0 | 0 | 0 | 0 | 0  | 0 | 0 | 0  | 0 | 0   |   |  |
| M02255_76_000000000-ADUNE_1_2106_24242_13935                                                                                                                                                                                 |   |    |     |   |   |   |    |    |     | T---AC---GT-AG-GTG-----GCA-A-G-----C--G--T---T--GT-C-CGG-AT-----TT-A--C-T--GG-GT-----GT--A---AA-GG-GC-----G-T--G---C-----AA-                                                                                      |   |    |   |    |   |   |   |   |   |   |    |   |   |    |   |     |   |  |
| ---G-T-C-A-----G-A-T--G--TG--A-AA-TC--T-C-AG-G-G----CT-T-AA-----C-C-C-T-G-A-A--A-C---T-G--C-A---T-T-----T--GA-A-A---C-----T--G-T--AT--G-T-C---T-T-G-A-G-T--G---C-CG---GA-G-A-----G-G-T-A---AT-C-----GG--A--ATT---C-C-T-T-GT- |   |    |     |   |   |   |    |    |     | -GT-A-G-CG-GT--G---A--A-A---TG-C-GT-AG--AT-A-TA--A-G--G-A-A-G-A-AC-A-CC--AG--T--G--GC-GAA-G--G-C--G-----G--A-T-T-A---CTG--G--AC-G-G-----T-A---A-C-T--GA--CG-G-T-G--A-GG--C-G-CG-A--AA-G-C---G-TG--GG-G--AG-C-     |   |    |   |    |   |   |   |   |   |   |    |   |   |    |   |     |   |  |
| G-AA-----CA--GG                                                                                                                                                                                                              |   |    |     |   |   |   |    |    |     | Bacteria(100);Firmicutes(100);Clostridia(100);Clostridiales(100);Ruminococcaceae(100);unclassified(100);unclassified(100);unclassified(100);unclassified(100);                                                    |   |    |   |    |   |   |   |   |   |   |    |   |   |    |   |     |   |  |



|                                                                                                                                                                                                                     |                                                                                                                                                                                                                 |                                                                                                                                            |     |   |   |   |    |   |   |    |    |   |   |     |     |     |    |    |    |   |    |    |   |   |    |    |  |
|---------------------------------------------------------------------------------------------------------------------------------------------------------------------------------------------------------------------|-----------------------------------------------------------------------------------------------------------------------------------------------------------------------------------------------------------------|--------------------------------------------------------------------------------------------------------------------------------------------|-----|---|---|---|----|---|---|----|----|---|---|-----|-----|-----|----|----|----|---|----|----|---|---|----|----|--|
| Otu0735                                                                                                                                                                                                             | 0                                                                                                                                                                                                               | 0                                                                                                                                          | 0   | 0 | 0 | 0 | 0  | 0 | 0 | 0  | 0  | 0 | 0 | 0   | 0   | 0   | 0  | 0  | 0  | 0 | 0  | 0  | 0 | 0 | 0  | 0  |  |
|                                                                                                                                                                                                                     | 0                                                                                                                                                                                                               | 0                                                                                                                                          | 0   | 0 | 0 | 0 | 0  | 0 | 0 | 0  | 0  | 0 | 0 | 0   | 0   | 0   | 0  | 0  | 0  | 0 | 0  | 0  | 0 | 0 | 0  | 0  |  |
|                                                                                                                                                                                                                     | 0                                                                                                                                                                                                               | 0                                                                                                                                          | 0   | 0 | 0 | 0 | 0  | 0 | 0 | 0  | 0  | 0 | 0 | 0   | 4   | 0   | 0  | 0  | 0  | 0 | 0  | 84 | 0 | 0 | 0  | 47 |  |
|                                                                                                                                                                                                                     | 0                                                                                                                                                                                                               | 0                                                                                                                                          | 0   | 0 | 0 | 0 | 0  | 0 | 0 | 0  | 0  | 0 | 0 | 0   | 0   | 0   | 0  | 58 | 0  | 0 | 0  | 0  | 0 | 0 |    |    |  |
| M02255_77_000000000-ADUT3_1_1105_12733_11765                                                                                                                                                                        | T---                                                                                                                                                                                                            | AC--GT-AG-GGA-----GCG-A-G-----C--G-T---T--AT-C-CGG-AT-----TT-A--T-T-GG-GT-----GT--A----AA-GG-GT-GC-----G-TA-G-A-C-G-----G--A-AA-T-A-C----- |     |   |   |   |    |   |   |    |    |   |   |     |     |     |    |    |    |   |    |    |   |   |    |    |  |
| ----                                                                                                                                                                                                                | AA---G-T-T-A-----G-T-T--G--TG--A-AA-TA--C-C-TC-G-G----CT-T-AA-----C-T-G-G-G-G-A--A-C---T-G--C-A--A-C-----T-AA-A-A--C-----T-A-T-AT--T-T-C---T-T-G-A-G-T-A--T-CG---GA-G-G-----G-G-T-T--TG-T-----GG--A--ATT---C-T- |                                                                                                                                            |     |   |   |   |    |   |   |    |    |   |   |     |     |     |    |    |    |   |    |    |   |   |    |    |  |
| T-A-GT--GT-A-G-CG-GT--G--A--A-A--TG-C-GT-AG--AT-A-TT--A-G--G-A-A-G-A-AC-A-CC--GG--T--G--GC-GAA-G--G-C-G-----A-C-A-A-A--CTG--G--AC-G-A-----T-A--A-C-T-GA--CG-T-T-G--A-GG--C-A-CG-A--AA-G-T--G-TG--GG-G--             |                                                                                                                                                                                                                 |                                                                                                                                            |     |   |   |   |    |   |   |    |    |   |   |     |     |     |    |    |    |   |    |    |   |   |    |    |  |
| AG-C-A-AA-----CA--GG                                                                                                                                                                                                | Bacteria(100);Firmicutes(100);Clostridia(100);Clostridiales(100);Ruminococcaceae(100);uncultured(100);unclassified(100);unclassified(100);unclassified(100);                                                    |                                                                                                                                            |     |   |   |   |    |   |   |    |    |   |   |     |     |     |    |    |    |   |    |    |   |   |    |    |  |
| Otu0736                                                                                                                                                                                                             | 0                                                                                                                                                                                                               | 0                                                                                                                                          | 0   | 0 | 0 | 0 | 0  | 0 | 0 | 0  | 0  | 0 | 0 | 0   | 0   | 0   | 0  | 2  | 0  | 0 | 0  | 0  | 0 | 0 | 0  | 0  |  |
|                                                                                                                                                                                                                     | 0                                                                                                                                                                                                               | 0                                                                                                                                          | 3   | 0 | 0 | 0 | 32 | 0 | 0 | 2  | 2  | 0 | 0 | 21  | 100 | 0   | 87 | 53 | 0  | 0 | 59 | 0  | 0 | 0 | 0  | 99 |  |
|                                                                                                                                                                                                                     | 0                                                                                                                                                                                                               | 0                                                                                                                                          | 0   | 0 | 0 | 0 | 0  | 0 | 0 | 0  | 0  | 0 | 0 | 0   | 0   | 0   | 0  | 0  | 0  | 0 | 0  | 0  | 0 | 0 | 32 | 0  |  |
|                                                                                                                                                                                                                     | 4                                                                                                                                                                                                               | 0                                                                                                                                          | 0   | 0 | 0 | 0 | 0  | 0 | 0 | 4  | 0  | 0 | 4 | 0   | 0   | 0   | 0  | 11 | 0  | 0 | 29 | 5  | 0 | 0 | 0  | 0  |  |
| M02255_76_000000000-ADUNE_1_1118_17072_9809                                                                                                                                                                         | ....AC---                                                                                                                                                                                                       | T-AC-GT-----GCC-A-G-----C-A-G--C--CG-C-GGT-AA-----TA-C--G-T-AG-GT-----GG--C---AA-GC-G--TT-----G---T-C-C-G-----G--A-AT-G-A-T-----AA---G-    |     |   |   |   |    |   |   |    |    |   |   |     |     |     |    |    |    |   |    |    |   |   |    |    |  |
| T-C-T-----G-A-T--G--TG--A-AA-GC--C-C-AC-G-G----CT-C-AA-----C-C-G-T-G-G-A--A-C---T-G--C-A--T-C-----G--GA-A-A--C-----T-G-T--CA--T-T-C---T-T-G-A-G-T--G--C-AG---AA-G-A-----G-G-A-G--AG-T-----GG--A--ACT---C-C-A-T-GT-- |                                                                                                                                                                                                                 |                                                                                                                                            |     |   |   |   |    |   |   |    |    |   |   |     |     |     |    |    |    |   |    |    |   |   |    |    |  |
| GT-A-G-CG-GT--G--G--A-A--TG-C-GT-AG--AT-A-TA--T-G--G-A-A-G-A-AC-A-CC--AG--T--G--GC-GAA-G--G-C-G-----G--C-T-C-T--CTG--G--TC-T-G-----C-A--A-C-T-GA--CG-C-T-G--A-GG--C-T-CG-A--AA-G-C--A-TG--GG-T--AG-C-G-             |                                                                                                                                                                                                                 |                                                                                                                                            |     |   |   |   |    |   |   |    |    |   |   |     |     |     |    |    |    |   |    |    |   |   |    |    |  |
| AA-----CA--GG                                                                                                                                                                                                       | Bacteria(100);Firmicutes(100);Bacilli(100);Lactobacillales(100);unclassified(57);unclassified(57);unclassified(57);unclassified(57);unclassified(57);                                                           |                                                                                                                                            |     |   |   |   |    |   |   |    |    |   |   |     |     |     |    |    |    |   |    |    |   |   |    |    |  |
| Otu0737                                                                                                                                                                                                             | 0                                                                                                                                                                                                               | 0                                                                                                                                          | 0   | 0 | 0 | 0 | 0  | 0 | 0 | 0  | 0  | 0 | 0 | 0   | 0   | 0   | 0  | 3  | 0  | 0 | 0  | 0  | 0 | 0 | 0  | 0  |  |
|                                                                                                                                                                                                                     | 0                                                                                                                                                                                                               | 2                                                                                                                                          | 0   | 0 | 0 | 0 | 0  | 0 | 9 | 19 | 1  | 0 | 0 | 0   | 0   | 104 | 0  | 1  | 0  | 0 | 0  | 0  | 0 | 0 | 1  | 0  |  |
|                                                                                                                                                                                                                     | 0                                                                                                                                                                                                               | 0                                                                                                                                          | 0   | 0 | 0 | 0 | 0  | 0 | 0 | 0  | 0  | 0 | 0 | 0   | 0   | 0   | 0  | 0  | 0  | 0 | 0  | 0  | 0 | 0 | 0  | 0  |  |
|                                                                                                                                                                                                                     | 0                                                                                                                                                                                                               | 0                                                                                                                                          | 0   | 0 | 0 | 0 | 0  | 0 | 0 | 0  | 0  | 0 | 0 | 0   | 0   | 0   | 0  | 0  | 0  | 0 | 0  | 0  | 0 | 0 | 0  | 0  |  |
| M02255_77_000000000-ADUT3_1_1110_14104_17809                                                                                                                                                                        | T---                                                                                                                                                                                                            | AC--GG-AG-GAG-----GCA-A-G-----C--G-T---T--AT-C-CGG-AA-----TT-A--T-T-GG-GC-----GT--A----AA-GA-GT-CC-----G-TA-G-G-T-G-----G--G-TA-A-C-C----- |     |   |   |   |    |   |   |    |    |   |   |     |     |     |    |    |    |   |    |    |   |   |    |    |  |
| ----                                                                                                                                                                                                                | AA---G-T-T-A-----G-T-T--G--TT--A-AA-TA--G-T-GA-A-G----CT-T-AA-----C-T-T-C-A-T-A--G-A--G-G--C-G--A-C-----T-GA-A-A--C-----T-G-G-TT--A-T-C---T-A-G-A-G-T--G--T-GG---TA-G-G-----G-G-T-A--GA-G-----GG--A--ATT---T-   |                                                                                                                                            |     |   |   |   |    |   |   |    |    |   |   |     |     |     |    |    |    |   |    |    |   |   |    |    |  |
| C-C-A-GT--GT-A-G-CG-GT--G--A--A-A--TG-C-GT-AG--AT-A-TT--G-G--A-A-A-G-A-AC-A-CC--GG--T--G--GC-GAA-A-G-C-G-----C--T-C-T-A--CTG--G--GC-C-T-----G-C--A-C-T-GA--CA-C-T-G--A-GG--G-A-CG-A--AA-G-C--T-AG--GG-G-            |                                                                                                                                                                                                                 |                                                                                                                                            |     |   |   |   |    |   |   |    |    |   |   |     |     |     |    |    |    |   |    |    |   |   |    |    |  |
| -AG-C-G-AA-----AG--GG                                                                                                                                                                                               | Bacteria(100);Cyanobacteria(100);unclassified(98);unclassified(98);unclassified(98);unclassified(98);unclassified(98);unclassified(98);unclassified(98);                                                        |                                                                                                                                            |     |   |   |   |    |   |   |    |    |   |   |     |     |     |    |    |    |   |    |    |   |   |    |    |  |
| Otu0738                                                                                                                                                                                                             | 0                                                                                                                                                                                                               | 0                                                                                                                                          | 0   | 0 | 0 | 0 | 0  | 0 | 0 | 0  | 0  | 0 | 0 | 0   | 0   | 0   | 0  | 0  | 0  | 0 | 1  | 0  | 0 | 0 | 0  | 0  |  |
|                                                                                                                                                                                                                     | 0                                                                                                                                                                                                               | 0                                                                                                                                          | 119 | 0 | 0 | 0 | 0  | 0 | 0 | 51 | 10 | 0 | 0 | 153 | 0   | 0   | 0  | 0  | 49 | 0 | 0  | 0  | 0 | 0 | 49 | 0  |  |
|                                                                                                                                                                                                                     | 0                                                                                                                                                                                                               | 0                                                                                                                                          | 0   | 0 | 0 | 0 | 0  | 0 | 1 | 0  | 0  | 0 | 2 | 0   | 0   | 236 | 0  | 0  | 0  | 0 | 0  | 0  | 0 | 0 | 0  | 0  |  |
|                                                                                                                                                                                                                     | 0                                                                                                                                                                                                               | 0                                                                                                                                          | 0   | 0 | 0 | 0 | 0  | 0 | 0 | 0  | 0  | 0 | 0 | 0   | 0   | 0   | 11 | 51 | 0  | 0 | 0  | 0  | 0 | 0 | 58 |    |  |



|                                                                                                                                                                                                                                                                                                                                                                                                                                                                                                                                                                                                                                                                                                                                                                                                                       |   |   |   |   |   |   |   |   |   |   |    |   |   |   |   |   |   |   |   |   |   |    |    |   |   |   |  |
|-----------------------------------------------------------------------------------------------------------------------------------------------------------------------------------------------------------------------------------------------------------------------------------------------------------------------------------------------------------------------------------------------------------------------------------------------------------------------------------------------------------------------------------------------------------------------------------------------------------------------------------------------------------------------------------------------------------------------------------------------------------------------------------------------------------------------|---|---|---|---|---|---|---|---|---|---|----|---|---|---|---|---|---|---|---|---|---|----|----|---|---|---|--|
| Otu0740                                                                                                                                                                                                                                                                                                                                                                                                                                                                                                                                                                                                                                                                                                                                                                                                               | 0 | 0 | 0 | 0 | 0 | 0 | 0 | 0 | 0 | 0 | 0  | 0 | 0 | 0 | 0 | 0 | 0 | 0 | 0 | 0 | 0 | 0  | 0  | 0 | 0 | 0 |  |
|                                                                                                                                                                                                                                                                                                                                                                                                                                                                                                                                                                                                                                                                                                                                                                                                                       | 0 | 0 | 0 | 0 | 0 | 0 | 0 | 0 | 0 | 0 | 20 | 0 | 0 | 0 | 0 | 0 | 0 | 0 | 0 | 0 | 0 | 0  | 0  | 0 | 0 | 0 |  |
|                                                                                                                                                                                                                                                                                                                                                                                                                                                                                                                                                                                                                                                                                                                                                                                                                       | 0 | 0 | 0 | 0 | 0 | 0 | 0 | 0 | 0 | 0 | 0  | 0 | 0 | 0 | 0 | 0 | 0 | 0 | 0 | 0 | 0 | 0  | 0  | 0 | 0 | 0 |  |
|                                                                                                                                                                                                                                                                                                                                                                                                                                                                                                                                                                                                                                                                                                                                                                                                                       | 0 | 0 | 0 | 0 | 0 | 0 | 0 | 0 | 0 | 0 | 0  | 0 | 0 | 0 | 0 | 0 | 0 | 0 | 0 | 0 | 0 | 0  | 0  | 0 | 0 | 0 |  |
| M02255_77_000000000-ADUT3_1_2108_16554_9942 T---AC--GA-AG-GGG-----GCT-A-G----C-G-T--T--GC-T-CGG-AA-----TG-A-C-T--GG-GC-----GT-A---AA-GG-GC-GC-----G-TA-G-G-C-G-----G-A-TG-G-C-T-----TT---G-T-C-G-----G-G-C--G--TG--A-AA-TT--C-C-AG-G-G----CT-T-AA-----C-C-T-T-G-G-G--G-C---T-G--C-G--T-T-----C--GA-G-A--C-----G-G-G--TT-G-T-C---T-T-G-A-G-T--T--C-GG----AA-G-A-----G-G-G-T--CG-T-----GG--A--ATT---C-C-C-A-GT--GT-A-G-AG-GT--G---A-A-A---TT-C-GT-AG--AT-A-TT--G-G--G-A-A-G-A-AC-A-CC--GG--T-G--GC-GAA-G--G-C-G-----G--C-G-A-C---CTG--G--TC-C-G-----A-G--A-C-T--GA--CG-C-T-G--A-GG--C-G-CG-A--AA-G-C---G-TG--GG-G--AG-C-A-AA-----CA--GG Bacteria(100);Proteobacteria(100);Alphaproteobacteria(100);Rhodospirillales(100);Acetobacteraceae(100);unclassified(100);unclassified(100);unclassified(100);unclassified(100); |   |   |   |   |   |   |   |   |   |   |    |   |   |   |   |   |   |   |   |   |   |    |    |   |   |   |  |
| Otu0741                                                                                                                                                                                                                                                                                                                                                                                                                                                                                                                                                                                                                                                                                                                                                                                                               | 0 | 0 | 0 | 0 | 0 | 0 | 0 | 0 | 0 | 0 | 0  | 0 | 0 | 0 | 0 | 0 | 0 | 0 | 0 | 0 | 0 | 18 | 0  | 0 | 0 | 0 |  |
|                                                                                                                                                                                                                                                                                                                                                                                                                                                                                                                                                                                                                                                                                                                                                                                                                       | 0 | 0 | 0 | 0 | 0 | 0 | 0 | 0 | 0 | 0 | 0  | 0 | 0 | 0 | 0 | 0 | 0 | 0 | 0 | 0 | 0 | 0  | 0  | 0 | 0 | 0 |  |
|                                                                                                                                                                                                                                                                                                                                                                                                                                                                                                                                                                                                                                                                                                                                                                                                                       | 0 | 0 | 0 | 0 | 0 | 0 | 0 | 0 | 0 | 0 | 0  | 0 | 0 | 0 | 0 | 0 | 0 | 0 | 0 | 0 | 0 | 0  | 0  | 0 | 0 | 0 |  |
|                                                                                                                                                                                                                                                                                                                                                                                                                                                                                                                                                                                                                                                                                                                                                                                                                       | 0 | 0 | 0 | 0 | 0 | 0 | 0 | 0 | 0 | 0 | 0  | 0 | 0 | 0 | 0 | 0 | 0 | 0 | 0 | 0 | 0 | 0  | 0  | 0 | 0 | 0 |  |
| M02255_77_000000000-ADUT3_1_2115_18474_18035 G---AC--GG-AG-GAG-----GCT-A-G----C-G-T--T--GT-T-CGG-AA-----TT-A-C-T--GG-GC-----GT-A---AA-GC-GT-GC-----G-CA-G-G-T-T-----G--T-GA-G-T-T-----CA---G-T-T-G-----G-A-T--G--TG--A-AA-GC--C-C-GG-G-G----CT-T-AA-----C-C-T-C-G-G-A--T-G---T-G--C-A--T-C-----C--AA-T-A--C-----T--G-G--CT--C-G-C---T-G-G-A-G-G--T--T-GG----AA-G-A-----G-G-A-G--AG-T-----GG--A--ATT---C-C-C-A-AGT--GT-A-G-AG-GT--G---A-A-A---TT-C-GT-AG--AT-A-TT--G-G--G-A-A-G-A-AC-A-CC--AG--T-G--GC-GAA-G--G-C-G-----G--C-T-C-T---CTG--G--TC-C-A-----T-A--C-C-T--GA--CA-C-T-C--A-TG--C-A-CG-A--AA-G-C---G-TG--GG-G--AG-C-A-AA-----CA--GG Bacteria(100);Proteobacteria(100);Alphaproteobacteria(100);MNG3(100);unclassified(100);unclassified(100);unclassified(100);unclassified(100);unclassified(100);            |   |   |   |   |   |   |   |   |   |   |    |   |   |   |   |   |   |   |   |   |   |    |    |   |   |   |  |
| Otu0742                                                                                                                                                                                                                                                                                                                                                                                                                                                                                                                                                                                                                                                                                                                                                                                                               | 0 | 0 | 0 | 0 | 0 | 0 | 0 | 0 | 0 | 0 | 0  | 0 | 0 | 0 | 0 | 0 | 0 | 0 | 0 | 0 | 0 | 0  | 0  | 0 | 0 | 0 |  |
|                                                                                                                                                                                                                                                                                                                                                                                                                                                                                                                                                                                                                                                                                                                                                                                                                       | 0 | 0 | 0 | 0 | 0 | 0 | 0 | 0 | 0 | 0 | 16 | 0 | 0 | 0 | 0 | 0 | 0 | 0 | 0 | 0 | 0 | 0  | 0  | 0 | 0 | 0 |  |
|                                                                                                                                                                                                                                                                                                                                                                                                                                                                                                                                                                                                                                                                                                                                                                                                                       | 0 | 0 | 0 | 0 | 0 | 0 | 0 | 0 | 0 | 0 | 0  | 0 | 0 | 0 | 0 | 0 | 0 | 0 | 0 | 0 | 0 | 0  | 0  | 0 | 0 | 0 |  |
|                                                                                                                                                                                                                                                                                                                                                                                                                                                                                                                                                                                                                                                                                                                                                                                                                       | 0 | 0 | 0 | 0 | 0 | 0 | 0 | 0 | 0 | 0 | 0  | 0 | 0 | 0 | 0 | 0 | 0 | 0 | 0 | 0 | 0 | 0  | 21 | 0 | 0 | 0 |  |
| M02255_77_000000000-ADUT3_1_1108_19712_10930 T---AC--GT-AG-GTG-----GCA-A-G----C-G--T--T--GT-C-CGG-AT-----TT-A--C-T--GG-GT-----GT-A---AA-GG-GC-GT-----G-CA-G-C-C-G-----G--G-CC-G-G-C-----AA---G-T-C-A-----G-A-T--G--TG--A-AA-TC--C-A-CG-G-G----CT-T-AA-----C-C-C-G-T-G-A--A-C---T-G--C-A--T-T-----T--GA-A-A--C-----T--G-T--TG--G-T-C---T-T-G-A-G-T-A--T-CG----GA-G-A-----G-G-T-A--AT-C-----GG--A--ATT---C-C-T-T-GT--GT-A-G-CG-GT--G---A-A-A---TG-C-GT-AG--AT-A-TA--A-G--G-A-A-G-A-AC-A-CC--AG--T-G--GC-GAA-G--G-C-G-----G--A-T-T-A---CTG--G--AC-G-A-----C-A--A-C-T--GA--CG-G-T-G--A-GG--C-G-CG-A--AA-G-C---G-TG--GG-G--AG-C-A-AA-----CA--GG Bacteria(100);Firmicutes(100);Clostridia(100);Clostridiales(100);Ruminococcaceae(100);unclassified(100);unclassified(100);unclassified(100);unclassified(100);             |   |   |   |   |   |   |   |   |   |   |    |   |   |   |   |   |   |   |   |   |   |    |    |   |   |   |  |
| Otu0743                                                                                                                                                                                                                                                                                                                                                                                                                                                                                                                                                                                                                                                                                                                                                                                                               | 0 | 0 | 0 | 0 | 0 | 0 | 0 | 0 | 0 | 0 | 0  | 0 | 0 | 0 | 0 | 0 | 0 | 0 | 0 | 0 | 0 | 0  | 0  | 0 | 0 | 0 |  |
|                                                                                                                                                                                                                                                                                                                                                                                                                                                                                                                                                                                                                                                                                                                                                                                                                       | 0 | 0 | 0 | 0 | 0 | 0 | 0 | 0 | 0 | 0 | 17 | 0 | 0 | 0 | 0 | 0 | 0 | 0 | 0 | 0 | 0 | 0  | 0  | 0 | 0 | 0 |  |
|                                                                                                                                                                                                                                                                                                                                                                                                                                                                                                                                                                                                                                                                                                                                                                                                                       | 0 | 0 | 0 | 0 | 0 | 0 | 0 | 0 | 0 | 0 | 0  | 0 | 0 | 0 | 0 | 0 | 0 | 0 | 0 | 0 | 0 | 0  | 0  | 0 | 0 | 0 |  |
|                                                                                                                                                                                                                                                                                                                                                                                                                                                                                                                                                                                                                                                                                                                                                                                                                       | 0 | 0 | 0 | 0 | 0 | 0 | 0 | 0 | 0 | 0 | 0  | 0 | 0 | 0 | 0 | 0 | 0 | 0 | 0 | 0 | 0 | 0  | 0  | 0 | 0 | 0 |  |
| M02255_77_000000000-ADUT3_1_1105_16395_10343 T---AC--GT-AG-GGC-----GCG-A-G----C-G--T--T--GT-C-CGG-AA-----TT-A--T-T--GG-GC-----GT-A---AA-GA-GC-TC-----G-TA-G-G-C-G-----G--C-TG-G-T-C-----GC---G-T-C-T-----G-C-C--G--TG--A-AA-G-G-C-C-TG-G-G----CT-T-AA-----C-T-C-G-G-G-T--T-T---T-G--C-G--G-T-----G--GA-T-A--C-----G-G-G--CC--G-G-C---T-A-G-A-G-G--T--A-GG----TA-G-G-----G-G                                                                                                                                                                                                                                                                                                                                                                                                                                           |   |   |   |   |   |   |   |   |   |   |    |   |   |   |   |   |   |   |   |   |   |    |    |   |   |   |  |



|                                                                                                                                                                                                                  |   |   |   |   |    |   |   |   |   |   |    |   |   |    |     |   |   |   |   |   |   |   |   |   |   |   |   |
|------------------------------------------------------------------------------------------------------------------------------------------------------------------------------------------------------------------|---|---|---|---|----|---|---|---|---|---|----|---|---|----|-----|---|---|---|---|---|---|---|---|---|---|---|---|
| Otu0745                                                                                                                                                                                                          | 0 | 0 | 0 | 0 | 0  | 0 | 0 | 0 | 0 | 0 | 0  | 0 | 0 | 0  | 0   | 0 | 0 | 0 | 0 | 0 | 0 | 4 | 0 | 0 | 0 | 0 | 0 |
|                                                                                                                                                                                                                  | 0 | 0 | 0 | 0 | 0  | 0 | 0 | 0 | 0 | 0 | 0  | 0 | 0 | 0  | 0   | 0 | 0 | 0 | 0 | 0 | 0 | 0 | 0 | 0 | 0 | 0 |   |
|                                                                                                                                                                                                                  | 0 | 0 | 0 | 0 | 0  | 0 | 0 | 0 | 0 | 0 | 0  | 0 | 0 | 0  | 0   | 0 | 0 | 0 | 0 | 0 | 0 | 0 | 0 | 0 | 0 | 0 |   |
|                                                                                                                                                                                                                  | 0 | 0 | 0 | 0 | 0  | 0 | 0 | 0 | 0 | 0 | 0  | 0 | 0 | 0  | 29  | 0 | 0 | 0 | 0 | 0 | 0 | 0 | 0 | 0 | 0 | 0 |   |
| M02255_77_000000000-ADUT3_1_2103_9602_10556 T---AC---GG-AG-GGT-----GCA-A-G-----C-G-T---T-AA-T-CGG-AA-----TA-A-C-T-GG-GC-----GT-A---AA-GG-GC-AT-----G-CA-G-G-C-G-----G-T-TA-T-A-C-----                            |   |   |   |   |    |   |   |   |   |   |    |   |   |    |     |   |   |   |   |   |   |   |   |   |   |   |   |
| AA---G-T-A-G-----G-A-T-G-TG--A-AA-GC--C-T-GG-G-G----CT-C-AA-----C-C-T-C-A-G-A-A-C---T-G-C-A--T-T-----C-TA-A-A--C-----T-G-T-GT-G-A-C---T-A-G-A-G-T-A--T-TG----CA-G-G-----G-G-G-A--GA-C-----GG-A-ATT---T-C-A-      |   |   |   |   |    |   |   |   |   |   |    |   |   |    |     |   |   |   |   |   |   |   |   |   |   |   |   |
| G-GT--GT-A-G-CG-GT--G---G-A-A--TG-C-GT-AG--AT-A-TC--T-G--A-A-A-G-A-AC-A-CC--AA-A-G-GC-GAA-G-G-C-A-----G-T-C-T-C--CTG-G-G-GC-A-A-----A-T--A-C-T-GA-CG-C-T-C-A-TA-T-G-CG-A-AA-G-C--G-TG--GG-T-AG-                  |   |   |   |   |    |   |   |   |   |   |    |   |   |    |     |   |   |   |   |   |   |   |   |   |   |   |   |
| C-A-AA-----CA--GG Bacteria(100);Proteobacteria(100);Gammaproteobacteria(100);Aeromonadales(100);Succinivibrionaceae(100);Succinivibrio(100);unclassified(100);unclassified(100);unclassified(100);               |   |   |   |   |    |   |   |   |   |   |    |   |   |    |     |   |   |   |   |   |   |   |   |   |   |   |   |
| Otu0746                                                                                                                                                                                                          | 0 | 0 | 0 | 0 | 0  | 0 | 0 | 0 | 0 | 0 | 0  | 0 | 0 | 0  | 0   | 0 | 0 | 0 | 0 | 0 | 0 | 0 | 0 | 0 | 0 | 0 |   |
|                                                                                                                                                                                                                  | 0 | 0 | 0 | 0 | 0  | 0 | 0 | 0 | 0 | 0 | 14 | 0 | 0 | 0  | 0   | 0 | 0 | 0 | 0 | 0 | 0 | 0 | 0 | 0 | 0 | 0 |   |
|                                                                                                                                                                                                                  | 0 | 0 | 0 | 0 | 0  | 0 | 0 | 0 | 0 | 0 | 0  | 0 | 0 | 0  | 109 | 0 | 0 | 0 | 0 | 0 | 0 | 0 | 0 | 0 | 0 | 0 |   |
|                                                                                                                                                                                                                  | 0 | 0 | 0 | 0 | 0  | 0 | 0 | 0 | 0 | 0 | 0  | 0 | 0 | 0  | 0   | 0 | 0 | 0 | 0 | 0 | 0 | 0 | 0 | 0 | 0 | 0 |   |
| M02255_77_000000000-ADUT3_1_1105_17467_16662 T---AC---GA-AG-GGG-----GCT-A-G-----C-G-T---T-GT-T-CGG-AA-----TT-A--C-T-GG-GC-----GT-A---AA-GC-GC-AC-----G-TA-G-G-C-G-----G-A-TC-A-T-T-----                          |   |   |   |   |    |   |   |   |   |   |    |   |   |    |     |   |   |   |   |   |   |   |   |   |   |   |   |
| -----TA---G-T-C-A-----G-G-G--G-TG--A-AA-TC--C-C-GG-G-G----CT-C-AA-----C-C-T-C-G-G-A-A-C---T-G--C-C--T-T-----T-GA-T-A--C-----T-G-A-TG-G-T-C---T-C-G-A-G-T-C--C-GA---TA-G-A-----G-G-T-G--AG-T-----GG-A-ATT---C-    |   |   |   |   |    |   |   |   |   |   |    |   |   |    |     |   |   |   |   |   |   |   |   |   |   |   |   |
| C-T-A-GT--GT-A-G-AG-GT--G---A-A-A--TT-C-GT-AG--AT-A-TT-A-G--G-A-A-G-A-AC-A-CC--AG--T-G--GC-GAA-G-G-C-G-----G-C-T-C-A--CTG-G-AT-C-G-----G-T--A-C-T-GA-CG-C-T-G--A-GG--T-G-CG-A-AA-G-C--G-TG--GG-G-                |   |   |   |   |    |   |   |   |   |   |    |   |   |    |     |   |   |   |   |   |   |   |   |   |   |   |   |
| -AG-C-A-AA-----CA--GG Bacteria(100);Proteobacteria(100);Alphaproteobacteria(100);Rhizobiales(100);Hyphomicrobiaceae(100);unclassified(100);unclassified(100);unclassified(100);unclassified(100);                |   |   |   |   |    |   |   |   |   |   |    |   |   |    |     |   |   |   |   |   |   |   |   |   |   |   |   |
| Otu0747                                                                                                                                                                                                          | 0 | 0 | 0 | 0 | 0  | 0 | 0 | 0 | 0 | 0 | 0  | 0 | 0 | 0  | 0   | 0 | 0 | 0 | 0 | 0 | 0 | 0 | 0 | 0 | 0 | 0 |   |
|                                                                                                                                                                                                                  | 0 | 0 | 0 | 0 | 0  | 0 | 0 | 0 | 0 | 0 | 7  | 0 | 0 | 0  | 0   | 0 | 0 | 0 | 0 | 0 | 0 | 0 | 0 | 0 | 0 | 0 |   |
|                                                                                                                                                                                                                  | 0 | 0 | 0 | 0 | 0  | 0 | 0 | 0 | 0 | 0 | 0  | 0 | 0 | 0  | 0   | 0 | 0 | 0 | 0 | 0 | 0 | 0 | 0 | 0 | 0 | 0 |   |
|                                                                                                                                                                                                                  | 0 | 0 | 0 | 0 | 12 | 0 | 0 | 0 | 0 | 0 | 0  | 0 | 0 | 0  | 21  | 0 | 0 | 0 | 0 | 0 | 0 | 0 | 0 | 0 | 0 | 0 |   |
| M02255_77_000000000-ADUT3_1_2112_21036_22412 T---AC---GT-AG-GGT-----GCG-A-G-----C-G-T---T-GT-C-CGG-AA-----TT-A--T-T-GG-GC-----GT-A---AA-GA-GC-TT-----G-TA-G-G-C-G-----G--T-TT-G-T-T-----                         |   |   |   |   |    |   |   |   |   |   |    |   |   |    |     |   |   |   |   |   |   |   |   |   |   |   |   |
| -----GC---G-T-C-A-----G-A-A--G-TG--A-AA-AC--T-C-AG-G-G----CT-T-AA-----C-C-C-T-G-A-G--C-C---T-G--C-T--T-C-----T-GA-T-A--C-----G-G-G-CA--G-A-C---T-A-G-A-G-G--A--A-GT---TA-G-G-----G-G-A-G--AA-C-----GG-A-ATT---C- |   |   |   |   |    |   |   |   |   |   |    |   |   |    |     |   |   |   |   |   |   |   |   |   |   |   |   |
| C-T-G-GT--GG-A-G-CG-GT--G---G-A-A--TG-C-GC-AG--AT-A-TC--A-G--G-A-G-G-A-AC-A-CC--GG--T-G--GC-GAA-G-G-C-G-----G-T-T-C-T--CTG-G-GA-C-T-----T-T--C-C-T-GA-CG-C-T-G--A-GA--A-G-CG-A-AA-G-C--G-TG--GG-                 |   |   |   |   |    |   |   |   |   |   |    |   |   |    |     |   |   |   |   |   |   |   |   |   |   |   |   |
| G--AG-C-A-AA-----CA--GG Bacteria(100);Actinobacteria(100);Actinobacteria(100);Actinobacteridae(100);Actinomycetales(100);Propionibacterineae(100);Propionibacteriaceae(100);unclassified(100);unclassified(100); |   |   |   |   |    |   |   |   |   |   |    |   |   |    |     |   |   |   |   |   |   |   |   |   |   |   |   |
| Otu0748                                                                                                                                                                                                          | 0 | 0 | 0 | 0 | 0  | 0 | 0 | 0 | 0 | 0 | 0  | 0 | 0 | 0  | 0   | 0 | 0 | 0 | 0 | 0 | 0 | 0 | 0 | 0 | 0 | 0 |   |
|                                                                                                                                                                                                                  | 0 | 0 | 0 | 0 | 0  | 0 | 0 | 0 | 0 | 0 | 1  | 0 | 0 | 0  | 0   | 0 | 0 | 0 | 0 | 0 | 0 | 0 | 0 | 0 | 0 | 0 |   |
|                                                                                                                                                                                                                  | 0 | 0 | 0 | 0 | 0  | 0 | 0 | 0 | 0 | 0 | 0  | 0 | 0 | 19 | 0   | 0 | 0 | 0 | 0 | 0 | 0 | 0 | 0 | 0 | 0 | 0 |   |
|                                                                                                                                                                                                                  | 0 | 0 | 0 | 0 | 0  | 0 | 0 | 0 | 0 | 0 | 0  | 0 | 0 | 0  | 0   | 0 | 0 | 0 | 0 | 0 | 0 | 0 | 0 | 0 | 0 | 0 |   |
| M02255_77_000000000-ADUT3_1_2104_25730_7401 T---AC---AG-AG-GGT-----GCA-A-G-----C-G-T---T-AA-T-CGG-AA-----TT-A--C-T-GG-GC-----GT-A                                                                                |   |   |   |   |    |   |   |   |   |   |    |   |   |    |     |   |   |   |   |   |   |   |   |   |   |   |   |



|                                              |                                                                                                                                                                                                          |   |   |   |   |   |   |   |   |   |    |    |                                                                                                                                                                                                                       |   |   |   |   |   |   |   |   |    |   |   |                                                                                                                                                                          |    |   |  |  |  |  |  |  |  |  |  |
|----------------------------------------------|----------------------------------------------------------------------------------------------------------------------------------------------------------------------------------------------------------|---|---|---|---|---|---|---|---|---|----|----|-----------------------------------------------------------------------------------------------------------------------------------------------------------------------------------------------------------------------|---|---|---|---|---|---|---|---|----|---|---|--------------------------------------------------------------------------------------------------------------------------------------------------------------------------|----|---|--|--|--|--|--|--|--|--|--|
| Otu0750                                      | 0                                                                                                                                                                                                        | 0 | 0 | 0 | 0 | 0 | 0 | 0 | 0 | 0 | 0  | 0  | 0                                                                                                                                                                                                                     | 0 | 0 | 0 | 0 | 0 | 0 | 0 | 0 | 0  | 0 | 0 | 0                                                                                                                                                                        | 0  |   |  |  |  |  |  |  |  |  |  |
|                                              | 0                                                                                                                                                                                                        | 0 | 0 | 0 | 0 | 0 | 0 | 0 | 0 | 0 | 0  | 19 | 0                                                                                                                                                                                                                     | 0 | 0 | 0 | 0 | 0 | 0 | 0 | 0 | 0  | 0 | 0 | 0                                                                                                                                                                        | 0  |   |  |  |  |  |  |  |  |  |  |
|                                              | 0                                                                                                                                                                                                        | 0 | 0 | 0 | 0 | 0 | 0 | 0 | 0 | 0 | 0  | 0  | 0                                                                                                                                                                                                                     | 0 | 0 | 0 | 0 | 0 | 0 | 0 | 0 | 0  | 0 | 0 | 0                                                                                                                                                                        | 0  |   |  |  |  |  |  |  |  |  |  |
|                                              | 0                                                                                                                                                                                                        | 0 | 0 | 0 | 0 | 0 | 0 | 0 | 0 | 0 | 0  | 0  | 0                                                                                                                                                                                                                     | 0 | 0 | 0 | 0 | 0 | 0 | 0 | 0 | 0  | 0 | 0 | 0                                                                                                                                                                        | 0  |   |  |  |  |  |  |  |  |  |  |
| M02255_76_000000000-ADUNE_1_1113_25735_20100 | C---TA--AC-TC-TGT-----GCC-A-G----C---A--G-CC-G-CGG-TA-----AT-A--C-A-GA-GG-----GT-G---CA--A-GC-G-----T-TG-T-T-C-G-----G--ATCC-T-G-C-----                                                                  |   |   |   |   |   |   |   |   |   |    |    | ---AA---G-T-C-A-----G-A-A-G--TG--A-AA-TC--T-C-AT-T-G----CT-C-AA-----C-G-A-T-G-A-G--G-C---T-G--C-T--T-T-----T-GA-T-A--C-----T-G-C--GG--A-T-C---T-G-G-A-G-A-C---C-GG-----TA-G-A-----G-G-C-T--GG-T-----AG--A--ATT---G-C- |   |   |   |   |   |   |   |   |    |   |   |                                                                                                                                                                          |    |   |  |  |  |  |  |  |  |  |  |
|                                              | A-G-GT--GT-A-G-CG-GT--G--G--A-A--TG-C-GT-AG--AG-A-TC--T-G--C-A-A-G-A-AT-A-CC--CG--T-G--GC-GAA-G-G-C-G-----G--C-C-A-G--CTG-G--GC-C-G-----G-T--T-C-T--GA-CG-C-T-G--A-GG--C-G-CG-A-AA-G-C--G-TG--GG-G--     |   |   |   |   |   |   |   |   |   |    |    | AG-C-A-AA-----CA--GG                                                                                                                                                                                                  |   |   |   |   |   |   |   |   |    |   |   | Bacteria(100);unclassified(100);unclassified(100);unclassified(100);unclassified(100);unclassified(100);unclassified(100);unclassified(100);unclassified(100);           |    |   |  |  |  |  |  |  |  |  |  |
| Otu0751                                      | 0                                                                                                                                                                                                        | 0 | 0 | 0 | 0 | 0 | 0 | 0 | 0 | 0 | 0  | 0  | 0                                                                                                                                                                                                                     | 0 | 0 | 0 | 0 | 0 | 0 | 0 | 0 | 1  | 0 | 2 | 0                                                                                                                                                                        | 0  | 0 |  |  |  |  |  |  |  |  |  |
|                                              | 0                                                                                                                                                                                                        | 0 | 0 | 0 | 0 | 0 | 2 | 0 | 0 | 0 | 0  | 0  | 0                                                                                                                                                                                                                     | 0 | 0 | 0 | 0 | 0 | 0 | 0 | 0 | 0  | 0 | 0 | 39                                                                                                                                                                       | 0  | 0 |  |  |  |  |  |  |  |  |  |
|                                              | 0                                                                                                                                                                                                        | 0 | 0 | 0 | 0 | 0 | 0 | 0 | 0 | 0 | 0  | 0  | 0                                                                                                                                                                                                                     | 0 | 0 | 0 | 0 | 0 | 0 | 0 | 0 | 0  | 0 | 0 | 0                                                                                                                                                                        | 0  |   |  |  |  |  |  |  |  |  |  |
|                                              | 0                                                                                                                                                                                                        | 0 | 0 | 0 | 0 | 0 | 0 | 0 | 0 | 0 | 0  | 0  | 0                                                                                                                                                                                                                     | 0 | 0 | 0 | 0 | 0 | 0 | 0 | 0 | 0  | 0 | 0 | 0                                                                                                                                                                        | 0  |   |  |  |  |  |  |  |  |  |  |
| M02255_77_000000000-ADUT3_1_2108_22084_23328 | T---AC--GA-AG-GGG-----GCT-A-G----C--G--T--T-GT-T-CGG-AT-----TT-A--C-T--GG-GC-----GT--A---AA-GC-GC-AC-----G-TA-G-G-C-G-----G--A-CT-A-T-T-----                                                             |   |   |   |   |   |   |   |   |   |    |    | -----AA---G-T-C-A-----G-G-G--G-TG--A-AA-TC--C-C-GG-G-G----CT-C-AA-----C-C-C-C-G-G-A-A-C---T-G--C-C--T-T-----T-GA-T-A--C-----T-G-G--TA-G-T-C---T-T-G-A-G-T-T--C-GA---GA-G-A-----G-G-T-G--AG-T-----GG--A--ATT---C-      |   |   |   |   |   |   |   |   |    |   |   |                                                                                                                                                                          |    |   |  |  |  |  |  |  |  |  |  |
|                                              | C-G-A-GT--GT-A-G-AG-GT--G--A--A-A--TT-C-GT-AG--AT-A-TT-C-G--G-A-G-G-A-AC-A-CC--AG--T-G--GC-GAA-G-G-C-G-----A--C-C-A-C--CTG-G--AC-T-A-----A-T--A-C-T--GA-CA-C-T-G--A-GG--T-G-CG-A-AA-G-C--G-TG--GG-G--    |   |   |   |   |   |   |   |   |   |    |    | -AG-C-A-AA-----CA--GG                                                                                                                                                                                                 |   |   |   |   |   |   |   |   |    |   |   | Bacteria(100);Proteobacteria(100);Alphaproteobacteria(100);Rhizobiales(100);unclassified(100);unclassified(100);unclassified(100);unclassified(100);unclassified(100);   |    |   |  |  |  |  |  |  |  |  |  |
| Otu0752                                      | 0                                                                                                                                                                                                        | 0 | 0 | 0 | 0 | 0 | 0 | 0 | 0 | 0 | 0  | 0  | 0                                                                                                                                                                                                                     | 0 | 0 | 0 | 0 | 0 | 0 | 0 | 0 | 19 | 0 | 0 | 0                                                                                                                                                                        | 0  | 0 |  |  |  |  |  |  |  |  |  |
|                                              | 0                                                                                                                                                                                                        | 0 | 0 | 0 | 0 | 0 | 0 | 0 | 0 | 0 | 0  | 0  | 0                                                                                                                                                                                                                     | 0 | 0 | 0 | 0 | 0 | 0 | 0 | 0 | 0  | 0 | 0 | 0                                                                                                                                                                        | 0  |   |  |  |  |  |  |  |  |  |  |
|                                              | 0                                                                                                                                                                                                        | 0 | 0 | 0 | 0 | 0 | 0 | 0 | 0 | 0 | 0  | 0  | 0                                                                                                                                                                                                                     | 0 | 0 | 0 | 0 | 0 | 0 | 0 | 0 | 0  | 0 | 0 | 0                                                                                                                                                                        | 0  |   |  |  |  |  |  |  |  |  |  |
|                                              | 0                                                                                                                                                                                                        | 0 | 0 | 0 | 0 | 0 | 0 | 0 | 0 | 0 | 0  | 0  | 0                                                                                                                                                                                                                     | 0 | 0 | 0 | 0 | 0 | 0 | 0 | 0 | 0  | 0 | 0 | 0                                                                                                                                                                        | 0  |   |  |  |  |  |  |  |  |  |  |
| M02255_77_000000000-ADUT3_1_2119_20634_13659 | T---AC--GA-AG-GGA-----GCG-A-G----C--G--T--T-GT-T-CGG-AA-----TC-A--C-T--GG-GC-----TT--A---AA-GC-GT-GT-----G-TA-G-G-T-G-----G--T-CA-T-G-T-----                                                             |   |   |   |   |   |   |   |   |   |    |    | -----AA---G-T-A-A-----G-A-A-G--TG--A-AA-GC--C-C-CG-G-G----CT-T-AA-----C-C-T-G-G-G-A-A-T---T-G--C-T--T-T-----T-TA-G-A--C-----T-G-C--AT-G-G-C---T-G-G-A-G-T-T--C-TG---GA-G-A-----G-G-T-T--AG-G-----AG--A--ATT---C-      |   |   |   |   |   |   |   |   |    |   |   |                                                                                                                                                                          |    |   |  |  |  |  |  |  |  |  |  |
|                                              | C-G-A-GT--GT-A-G-AG-GT--G--A--A-A--TT-C-GC-AG--AT-A-TT-C-G--G-A-G-G-A-AT-A-CC--AG--T-G--GC-GAA-G-G-C-G-----C--C-T-A-A--CTG-G--AC-A-G-----A-T--A-C-T--GA-CA-C-T-G--A-AA--C-A-CG-A-AA-G-C--G-TG--GG-T-     |   |   |   |   |   |   |   |   |   |    |    | -AG-C-A-AA-----CA--GG                                                                                                                                                                                                 |   |   |   |   |   |   |   |   |    |   |   | Bacteria(100);Proteobacteria(100);unclassified(100);unclassified(100);unclassified(100);unclassified(100);unclassified(100);unclassified(100);unclassified(100);         |    |   |  |  |  |  |  |  |  |  |  |
| Otu0753                                      | 0                                                                                                                                                                                                        | 0 | 0 | 0 | 0 | 0 | 0 | 0 | 0 | 0 | 0  | 0  | 0                                                                                                                                                                                                                     | 0 | 0 | 0 | 0 | 0 | 0 | 0 | 0 | 0  | 0 | 0 | 0                                                                                                                                                                        | 0  | 0 |  |  |  |  |  |  |  |  |  |
|                                              | 0                                                                                                                                                                                                        | 0 | 0 | 0 | 0 | 0 | 0 | 0 | 0 | 0 | 45 | 0  | 0                                                                                                                                                                                                                     | 0 | 0 | 0 | 0 | 0 | 0 | 0 | 0 | 0  | 0 | 0 | 0                                                                                                                                                                        | 0  | 0 |  |  |  |  |  |  |  |  |  |
|                                              | 0                                                                                                                                                                                                        | 0 | 0 | 0 | 0 | 0 | 0 | 0 | 0 | 0 | 0  | 0  | 0                                                                                                                                                                                                                     | 0 | 0 | 0 | 0 | 0 | 0 | 0 | 0 | 0  | 0 | 0 | 0                                                                                                                                                                        | 24 |   |  |  |  |  |  |  |  |  |  |
|                                              | 0                                                                                                                                                                                                        | 0 | 0 | 0 | 0 | 0 | 0 | 0 | 0 | 0 | 0  | 0  | 0                                                                                                                                                                                                                     | 0 | 0 | 0 | 0 | 0 | 0 | 0 | 0 | 0  | 0 | 0 | 0                                                                                                                                                                        | 0  |   |  |  |  |  |  |  |  |  |  |
| M02255_77_000000000-ADUT3_1_1107_19114_20543 | T---AC--GT-AG-GTG-----GCA-A-G----C--G--T--T-GT-C-CGG-AA-----TT-A--C-T--GG-GT-----GT--A---AA-GG-GA-GT-----G-TA-G-G-C-G-----G--G-AT-A-T-C-----                                                             |   |   |   |   |   |   |   |   |   |    |    | -----AA---G-T-C-A-----G-A-A-G--TG--A-AA-AT--T-A-CG-G-G----CT-C-AA-----C-T-C-G-T-A-A-C-C---T-G--C-T--T-T-----T-GA-A-A--C-----T-G-A-CA--T-T-C---T-T-G-A-G-T-G--A-AG---TA-G-A-----G-G-C-A--AG-C-----GG--A--ATT---C-      |   |   |   |   |   |   |   |   |    |   |   |                                                                                                                                                                          |    |   |  |  |  |  |  |  |  |  |  |
|                                              | C-T-A-GT--GT-A-G-CG-GT--G--A--A-A--TG-C-GT-AG--AT-A-TT-A-G--G-A-G-G-A-AC-A-CC--AG--T-G--GC-GAA-G-G-C-G-----G--C-T-T-G--CTG-G--GC-T-T-----T-T--A-C-T--GA-CG-C-T-G--A-GG--C-T-CG-A-AA-G-C--G-TG--GG-G--    |   |   |   |   |   |   |   |   |   |    |    | -AG-C-A-AA-----CA--GG                                                                                                                                                                                                 |   |   |   |   |   |   |   |   |    |   |   | Bacteria(100);Firmicutes(100);Clostridia(100);Clostridiales(100);unclassified(100);unclassified(100);unclassified(100);unclassified(100);unclassified(100);              |    |   |  |  |  |  |  |  |  |  |  |
| Otu0754                                      | 0                                                                                                                                                                                                        | 0 | 0 | 0 | 0 | 0 | 0 | 0 | 0 | 0 | 0  | 0  | 0                                                                                                                                                                                                                     | 0 | 0 | 0 | 0 | 0 | 0 | 0 | 0 | 0  | 0 | 0 | 0                                                                                                                                                                        | 0  | 0 |  |  |  |  |  |  |  |  |  |
|                                              | 0                                                                                                                                                                                                        | 0 | 0 | 0 | 0 | 0 | 0 | 0 | 0 | 0 | 35 | 0  | 0                                                                                                                                                                                                                     | 0 | 0 | 0 | 0 | 0 | 0 | 0 | 0 | 0  | 0 | 0 | 0                                                                                                                                                                        | 0  | 0 |  |  |  |  |  |  |  |  |  |
|                                              | 0                                                                                                                                                                                                        | 0 | 0 | 0 | 0 | 0 | 0 | 0 | 0 | 0 | 0  | 0  | 0                                                                                                                                                                                                                     | 0 | 0 | 0 | 0 | 0 | 0 | 0 | 0 | 0  | 0 | 0 | 0                                                                                                                                                                        | 0  |   |  |  |  |  |  |  |  |  |  |
|                                              | 0                                                                                                                                                                                                        | 0 | 0 | 0 | 0 | 0 | 0 | 0 | 0 | 0 | 0  | 0  | 0                                                                                                                                                                                                                     | 0 | 0 | 0 | 0 | 0 | 0 | 0 | 0 | 0  | 0 | 0 | 0                                                                                                                                                                        | 0  |   |  |  |  |  |  |  |  |  |  |
| M02255_77_000000000-ADUT3_1_1116_14690_15130 | T---AC--GT-AG-GAC-----CCA-A-G----C--G--T--T-AT-C-CGG-AG-----TG-A--C-T--GG-GC-----GT--A---AA-GA-GTTGC-----G-TA-G-G-T-G-----G--T-TT-G-T-T-----                                                             |   |   |   |   |   |   |   |   |   |    |    | -----AA---G-C-G-A-----A-T-G--G-TG--A-AA-TC--T-G-GC-G-G----CT-C-AA-----C-C-G-T-ACA-G--A-C---T-A--T-T--A-T-----T-CG-A-A--C-----T-G-G--CA--A-A-C---T-C-G-A-G-A--A--C-AG---CA-G-A-----G-G-T-A--AC-T-----GG--A--ATT---T-   |   |   |   |   |   |   |   |   |    |   |   |                                                                                                                                                                          |    |   |  |  |  |  |  |  |  |  |  |
|                                              | C-T-G-AA--GT-A-G-GG-GT--A--A--T-A--TC-C-GT-AG--AT-A-TC--A-G--A-A-G-G-A-AC-A-CC--AA--T-G--GC-GTA-G--G-C-A-----G--G-T-T-A--CTG-G--GC-T-G-----T-T--T-C-T--GA--CA-C-T-G--A-GG--C-A-CG-A-AA-G-C--G-TG--GG-G-- |   |   |   |   |   |   |   |   |   |    |    | AG-C-G-AA-----CC--GG                                                                                                                                                                                                  |   |   |   |   |   |   |   |   |    |   |   | Bacteria(100);Candidate_division_TM7(100);unclassified(100);unclassified(100);unclassified(100);unclassified(100);unclassified(100);unclassified(100);unclassified(100); |    |   |  |  |  |  |  |  |  |  |  |



|         |                                                                                                                                                                                                                                                                                                                                                                                                                                                                                                                                                                                                                                                                                                                                                                                                                        |   |   |   |   |   |   |   |    |   |    |   |   |   |   |   |   |   |   |   |   |   |   |   |   |   |   |  |
|---------|------------------------------------------------------------------------------------------------------------------------------------------------------------------------------------------------------------------------------------------------------------------------------------------------------------------------------------------------------------------------------------------------------------------------------------------------------------------------------------------------------------------------------------------------------------------------------------------------------------------------------------------------------------------------------------------------------------------------------------------------------------------------------------------------------------------------|---|---|---|---|---|---|---|----|---|----|---|---|---|---|---|---|---|---|---|---|---|---|---|---|---|---|--|
| Otu0755 | 0                                                                                                                                                                                                                                                                                                                                                                                                                                                                                                                                                                                                                                                                                                                                                                                                                      | 0 | 0 | 0 | 0 | 0 | 0 | 0 | 0  | 0 | 0  | 0 | 0 | 0 | 0 | 0 | 0 | 0 | 0 | 0 | 0 | 0 | 0 | 0 | 0 | 0 | 0 |  |
|         | 0                                                                                                                                                                                                                                                                                                                                                                                                                                                                                                                                                                                                                                                                                                                                                                                                                      | 0 | 0 | 0 | 0 | 0 | 0 | 0 | 0  | 0 | 57 | 0 | 0 | 0 | 0 | 0 | 0 | 0 | 0 | 0 | 0 | 0 | 0 | 0 | 0 | 0 | 0 |  |
|         | 0                                                                                                                                                                                                                                                                                                                                                                                                                                                                                                                                                                                                                                                                                                                                                                                                                      | 0 | 0 | 0 | 0 | 0 | 0 | 0 | 0  | 0 | 0  | 0 | 0 | 0 | 0 | 0 | 0 | 0 | 0 | 0 | 0 | 0 | 0 | 0 | 0 | 0 | 0 |  |
|         | 0                                                                                                                                                                                                                                                                                                                                                                                                                                                                                                                                                                                                                                                                                                                                                                                                                      | 0 | 0 | 0 | 0 | 0 | 0 | 0 | 0  | 0 | 0  | 0 | 0 | 0 | 0 | 0 | 0 | 0 | 0 | 0 | 0 | 0 | 0 | 0 | 0 | 0 | 0 |  |
|         | M02255_77_000000000-ADUT3_1_1117_7675_23689 G---AC---GT-AG-GAG-----GCG-A-G-----C-G-T---T--AT-C-CGG-AT-----TC-A-C-T--GG-GC-----GT--A---AA-GC-GC-AT-----G-TA-G-G-C-G-----G--T-TT-G-T-T-----AA-<br>---G-T-C-C-----G-G-T-G--TT-A-AA-GC-C-C-CT-G-G---CT-C-AA-----C-T-G-G-G-G-G-A-G---G-T-C-A---T-T-----G--GA-G-A--C-----T-A-A-CA-G-A-C---T-T-G-A-G-G-G---C-AA---CA-G-A-----G-G-C-A--CG-T-----GG-A-ACT---C-C-C-G-<br>GT--GT-A-G-CG-GT-G---G-A-A--TG-C-GT-AG--AG-A-TC--G-G-G-A-A-G-A-AC-A-CC---AG--T-G--GC-GAA-G--G-C-G-----A-C-G-T-G---CTG-G-GT-T-G-----C-A---A-C-T-GA-CG-C-T-G--A-GA--T-G-CG-A-AA-G-T--G-TG--GG-G--AG-<br>C-A-AA-----CG--GG Bacteria(100);unclassified(100);unclassified(100);unclassified(100);unclassified(100);unclassified(100);unclassified(100);unclassified(100);unclassified(100);                  |   |   |   |   |   |   |   |    |   |    |   |   |   |   |   |   |   |   |   |   |   |   |   |   |   |   |  |
| Otu0756 | 0                                                                                                                                                                                                                                                                                                                                                                                                                                                                                                                                                                                                                                                                                                                                                                                                                      | 0 | 0 | 0 | 0 | 0 | 0 | 0 | 0  | 0 | 0  | 0 | 0 | 0 | 0 | 0 | 0 | 0 | 0 | 0 | 0 | 0 | 0 | 0 | 0 | 0 | 0 |  |
|         | 0                                                                                                                                                                                                                                                                                                                                                                                                                                                                                                                                                                                                                                                                                                                                                                                                                      | 3 | 0 | 0 | 0 | 0 | 0 | 0 | 16 | 3 | 0  | 0 | 0 | 0 | 0 | 0 | 0 | 0 | 0 | 0 | 0 | 0 | 0 | 0 | 0 | 0 | 0 |  |
|         | 0                                                                                                                                                                                                                                                                                                                                                                                                                                                                                                                                                                                                                                                                                                                                                                                                                      | 0 | 0 | 0 | 0 | 0 | 0 | 0 | 0  | 0 | 0  | 0 | 0 | 0 | 0 | 0 | 0 | 0 | 0 | 0 | 0 | 0 | 0 | 0 | 0 | 0 | 0 |  |
|         | 0                                                                                                                                                                                                                                                                                                                                                                                                                                                                                                                                                                                                                                                                                                                                                                                                                      | 0 | 0 | 0 | 0 | 0 | 0 | 0 | 0  | 0 | 0  | 0 | 0 | 0 | 0 | 0 | 0 | 0 | 0 | 0 | 0 | 0 | 0 | 0 | 0 | 0 | 0 |  |
|         | M02255_77_000000000-ADUT3_1_2111_23617_16176 T---AC---AG-AG-GGC-----TCG-A-G-----C-G-T---T--AA-T-CGG-AA-----TC-A-C-T--GG-GC-----TT--A---AA-GC-GT-GC-----G-TA-G-G-C-G-----G--A-TT-T-G-A-----<br>-----AG---G-C-G-C-----T-T-T--G--TG--A-AA-TC--C-C-TC-G-G---CT-C-AA-----C-C-G-A-G-G-A-A-C---T-G--C-T---T-G-----G--CG-A-A--C-----C-A-C-AA-A-T-C---T-T-G-A-G-G-C---T-GG---TA-G-A-----G-G-T-G---GT-C-----GG--A-ACA---A-<br>T-A-G-GT--GG-A-G-CG-GT-G---A-A-A--TG-C-GT-AG--AT-A-TC--T-A-T-T-G-G-A-AC-A-CC---GA-A-A-G-GT-GAA-G--A-C-A-----G-G-C-C-A--CTG-G--GC-C-A-----G-T---C-C-T-GA-CG-C-T-G--A-GG--C-A-CG-A-AA-G-C---G-TG--GG-T-<br>-AG-C-A-AA-----CG--GG Bacteria(100);Planctomycetes(100);Phycisphaerae(100);Phycisphaerales(100);Phycisphaeraceae(100);CL500-3(100);unclassified(100);unclassified(100);unclassified(100); |   |   |   |   |   |   |   |    |   |    |   |   |   |   |   |   |   |   |   |   |   |   |   |   |   |   |  |
| Otu0757 | 0                                                                                                                                                                                                                                                                                                                                                                                                                                                                                                                                                                                                                                                                                                                                                                                                                      | 0 | 0 | 0 | 0 | 0 | 0 | 0 | 0  | 0 | 0  | 0 | 0 | 0 | 0 | 0 | 0 | 0 | 0 | 0 | 0 | 0 | 9 | 0 | 0 | 0 | 0 |  |
|         | 0                                                                                                                                                                                                                                                                                                                                                                                                                                                                                                                                                                                                                                                                                                                                                                                                                      | 0 | 0 | 0 | 0 | 0 | 0 | 0 | 0  | 0 | 0  | 0 | 0 | 0 | 0 | 0 | 0 | 0 | 0 | 0 | 0 | 0 | 0 | 0 | 0 | 0 | 0 |  |
|         | 0                                                                                                                                                                                                                                                                                                                                                                                                                                                                                                                                                                                                                                                                                                                                                                                                                      | 0 | 0 | 0 | 0 | 0 | 0 | 0 | 0  | 0 | 0  | 0 | 0 | 0 | 0 | 6 | 0 | 0 | 0 | 0 | 0 | 0 | 0 | 0 | 0 | 0 | 0 |  |
|         | 0                                                                                                                                                                                                                                                                                                                                                                                                                                                                                                                                                                                                                                                                                                                                                                                                                      | 0 | 0 | 0 | 0 | 0 | 0 | 0 | 0  | 0 | 0  | 0 | 0 | 0 | 0 | 0 | 0 | 0 | 0 | 0 | 0 | 0 | 0 | 0 | 0 | 0 | 0 |  |
|         | M02255_76_000000000-ADUNE_1_1112_17353_22182 .....AC---T-AC-GT-----GCC-A-G-----C-A-G---C-CG-C-GGT-AA-----TA-C-G-T--AG-GT-----GG--C---AA-GC-G-TT-----G---T-C-C-G-----G--A-CG-A-T-T-----<br>AA---G-T-C-T-----G-A-T--G--TG--A-AA-TC--C-C-AC-G-G---CT-T-AA-----C-C-G-T-G-G-A-A-----G-GT-C-A---T-T-----G--GA-A-A--C-----T-G-A-TT--G-G-C---T-T-G-A-G-T-G---C-AG---AA-G-A-----G-G-A-G--AG-T-----GG--A-ATT---C-C-A-<br>C-GT--GT-A-G-CG-GT-G---A-A-A--TG-C-GT-AG--AT-A-TG--T-G--G-A-G-G-A-AC-A-CC---AG--T-G--GC-GAA-G--G-C-G-----G-C-T-C-T---CTG-G--TC-T-G-----C-A---A-C-T-GA-CG-C-T-G--A-GG--C-G-CG-A-AA-G-C---G-TG--GA-T-AG-<br>C-A-AA-----CA--GG Bacteria(100);Firmicutes(100);unclassified(100);unclassified(100);unclassified(100);unclassified(100);unclassified(100);unclassified(100);unclassified(100);                |   |   |   |   |   |   |   |    |   |    |   |   |   |   |   |   |   |   |   |   |   |   |   |   |   |   |  |
| Otu0758 | 0                                                                                                                                                                                                                                                                                                                                                                                                                                                                                                                                                                                                                                                                                                                                                                                                                      | 0 | 0 | 0 | 0 | 0 | 0 | 0 | 0  | 0 | 0  | 0 | 0 | 0 | 0 | 0 | 0 | 0 | 0 | 0 | 0 | 0 | 0 | 0 | 0 | 0 | 0 |  |
|         | 0                                                                                                                                                                                                                                                                                                                                                                                                                                                                                                                                                                                                                                                                                                                                                                                                                      | 0 | 0 | 0 | 0 | 0 | 0 | 0 | 0  | 0 | 23 | 0 | 0 | 0 | 0 | 0 | 0 | 0 | 0 | 0 | 0 | 0 | 0 | 0 | 0 | 0 | 0 |  |
|         | 0                                                                                                                                                                                                                                                                                                                                                                                                                                                                                                                                                                                                                                                                                                                                                                                                                      | 0 | 0 | 0 | 0 | 0 | 0 | 0 | 0  | 0 | 0  | 0 | 0 | 0 | 0 | 0 | 0 | 0 | 0 | 0 | 0 | 0 | 0 | 0 | 0 | 0 | 0 |  |
|         | 0                                                                                                                                                                                                                                                                                                                                                                                                                                                                                                                                                                                                                                                                                                                                                                                                                      | 0 | 0 | 0 | 0 | 0 | 0 | 0 | 0  | 0 | 0  | 0 | 0 | 0 | 0 | 0 | 0 | 0 | 0 | 0 | 0 | 0 | 0 | 0 | 0 | 0 | 0 |  |
|         | M02255_77_000000000-ADUT3_1_1116_8450_20867 T---AC---GG-AG-GGG-----GCT-A-G-----C-G-T---T--GT-T-CGG-AA-----TT-A-C-T--GG-GC-----GT--A---AA-GC-GC-AC-----G-TA-G                                                                                                                                                                                                                                                                                                                                                                                                                                                                                                                                                                                                                                                           |   |   |   |   |   |   |   |    |   |    |   |   |   |   |   |   |   |   |   |   |   |   |   |   |   |   |  |



|                                                                                                                                                                                                                                                                                                                                                                                                                                                                                                                                                                                                                                                                                                                                                                                                                            |   |   |   |    |   |   |   |   |   |   |    |   |   |   |   |   |   |   |   |   |   |   |    |   |   |   |   |
|----------------------------------------------------------------------------------------------------------------------------------------------------------------------------------------------------------------------------------------------------------------------------------------------------------------------------------------------------------------------------------------------------------------------------------------------------------------------------------------------------------------------------------------------------------------------------------------------------------------------------------------------------------------------------------------------------------------------------------------------------------------------------------------------------------------------------|---|---|---|----|---|---|---|---|---|---|----|---|---|---|---|---|---|---|---|---|---|---|----|---|---|---|---|
| Otu0760                                                                                                                                                                                                                                                                                                                                                                                                                                                                                                                                                                                                                                                                                                                                                                                                                    | 0 | 0 | 0 | 0  | 0 | 0 | 0 | 0 | 0 | 0 | 0  | 0 | 0 | 1 | 0 | 0 | 0 | 0 | 0 | 0 | 0 | 0 | 0  | 0 | 0 | 0 | 0 |
|                                                                                                                                                                                                                                                                                                                                                                                                                                                                                                                                                                                                                                                                                                                                                                                                                            | 0 | 0 | 0 | 97 | 0 | 0 | 0 | 0 | 0 | 0 | 0  | 0 | 0 | 0 | 0 | 0 | 0 | 0 | 0 | 0 | 0 | 0 | 0  | 0 | 0 | 0 | 0 |
|                                                                                                                                                                                                                                                                                                                                                                                                                                                                                                                                                                                                                                                                                                                                                                                                                            | 0 | 0 | 0 | 0  | 0 | 0 | 0 | 0 | 0 | 0 | 0  | 0 | 0 | 0 | 0 | 0 | 0 | 0 | 0 | 0 | 0 | 0 | 0  | 0 | 0 | 0 | 0 |
|                                                                                                                                                                                                                                                                                                                                                                                                                                                                                                                                                                                                                                                                                                                                                                                                                            | 0 | 0 | 0 | 0  | 0 | 0 | 0 | 0 | 0 | 0 | 0  | 0 | 0 | 0 | 0 | 0 | 0 | 0 | 0 | 0 | 0 | 0 | 0  | 0 | 0 | 0 | 0 |
| M02255_77_000000000-ADUT3_1_2109_6445_15208 T---AC---GT-AG-GTG-----GCA-A-G-----C-G-T---T-GT-C-CGG-AT-----TT-A-C-T-GG-GT-----GT-A---AA-GG-GC-GT-----G-TA-G-G-C-G-----G-G-AC-T-G-C-----AA-<br>---G-T-C-T-----G-A-T-G-TG--T-AA-TC--T-G-GT-G-G-----CT-C-AA-----C-C-A-C-C-A-A-A-C---T-G-C-A---T-T-----G-GA-A-A---C-----T-G-T-AG--T-T-C---T-T-G-A-G-T-A---T-CG---GA-G-A-----G-G-C-A--GG-C-----GG--A--ATT---C-C-T-A-<br>GT--GT-A-G-CG-GT-G---A-A-A---TG-C-GT-AG--AT-A-TT--A-G--G-A-A-G-A-AC-A-CC--AG--T--G--GC-GAA-G-G-C--G-----G-C-C-T-G---CTG-G--AC-G-A-----C-A---A-C-T-GA--CG-C-T-G--A-GG--C-G-CG-A-AA-G-C---G-TG--GG-G--AG-<br>C-A-AA-----CA--GG     Bacteria(100);Firmicutes(100);Clostridia(100);Clostridiales(100);unclassified(100);unclassified(100);unclassified(100);unclassified(100);unclassified(100);              |   |   |   |    |   |   |   |   |   |   |    |   |   |   |   |   |   |   |   |   |   |   |    |   |   |   |   |
| Otu0761                                                                                                                                                                                                                                                                                                                                                                                                                                                                                                                                                                                                                                                                                                                                                                                                                    | 0 | 0 | 0 | 0  | 0 | 0 | 0 | 0 | 0 | 0 | 0  | 0 | 0 | 0 | 0 | 0 | 0 | 0 | 0 | 0 | 0 | 0 | 24 | 0 | 0 | 0 | 0 |
|                                                                                                                                                                                                                                                                                                                                                                                                                                                                                                                                                                                                                                                                                                                                                                                                                            | 0 | 0 | 0 | 0  | 0 | 0 | 0 | 0 | 0 | 0 | 0  | 0 | 0 | 0 | 0 | 0 | 0 | 0 | 0 | 0 | 0 | 0 | 0  | 0 | 0 | 0 | 0 |
|                                                                                                                                                                                                                                                                                                                                                                                                                                                                                                                                                                                                                                                                                                                                                                                                                            | 0 | 0 | 0 | 0  | 0 | 0 | 0 | 0 | 0 | 0 | 0  | 0 | 0 | 0 | 0 | 0 | 0 | 0 | 0 | 0 | 0 | 0 | 0  | 0 | 0 | 0 | 0 |
|                                                                                                                                                                                                                                                                                                                                                                                                                                                                                                                                                                                                                                                                                                                                                                                                                            | 0 | 0 | 0 | 0  | 0 | 0 | 0 | 0 | 0 | 0 | 0  | 0 | 0 | 0 | 0 | 0 | 0 | 0 | 0 | 0 | 0 | 0 | 0  | 0 | 0 | 0 | 0 |
| M02255_77_000000000-ADUT3_1_1102_6528_19327 T---AC---AG-AG-GGA-----GCT-A-G-----C-G-T---T-GT-T-CGG-AA-----TC-A-C-T-GG-GC-----GT-A---AA-GC-GC-GC-----G-TA-G-G-T-G-----G--C-TT-A-G-T-----AA-<br>---G-T-T-A-----G-G-A-G-TG--A-AA-TC--C-T-GG-G-G-----CT-T-AA-----C-C-T-C-A-G-A-A-T---T-G--C-T--C-T-----T-AA-G-A---C-----T-G-C--TA--A-G-C---T-A-G-A-G-G-T--A-GG---CA-G-A-----G-G-A-T--GG-T-----GG--A--ATT---C-T-T-A-<br>GT--GT-A-G-CG-GT-G---A-A-A---TG-C-GT-AG--AT-A-TT--A-A-G-A-G-G-A-AC-A-CC--AG--T--G--GC-GAA-A-G-C--G-----G-C-C-A-T---CTG-G--GC-C-T-----A-T---T-C-T-GA--CA-C-T-A-A-AG--C-G-CG-A-AA-G-C---G-TG--GG-G--AG-C-<br>A-AA-----CA--GG     Bacteria(100);unclassified(100);unclassified(100);unclassified(100);unclassified(100);unclassified(100);unclassified(100);unclassified(100);unclassified(100);            |   |   |   |    |   |   |   |   |   |   |    |   |   |   |   |   |   |   |   |   |   |   |    |   |   |   |   |
| Otu0762                                                                                                                                                                                                                                                                                                                                                                                                                                                                                                                                                                                                                                                                                                                                                                                                                    | 0 | 0 | 0 | 0  | 0 | 0 | 0 | 0 | 0 | 0 | 0  | 0 | 0 | 0 | 0 | 0 | 0 | 0 | 0 | 0 | 0 | 0 | 0  | 0 | 0 | 0 | 0 |
|                                                                                                                                                                                                                                                                                                                                                                                                                                                                                                                                                                                                                                                                                                                                                                                                                            | 0 | 0 | 0 | 0  | 0 | 0 | 0 | 0 | 0 | 0 | 57 | 0 | 0 | 0 | 0 | 0 | 0 | 0 | 0 | 0 | 0 | 0 | 0  | 0 | 0 | 0 | 0 |
|                                                                                                                                                                                                                                                                                                                                                                                                                                                                                                                                                                                                                                                                                                                                                                                                                            | 0 | 0 | 0 | 0  | 0 | 0 | 0 | 0 | 0 | 0 | 0  | 0 | 0 | 0 | 0 | 0 | 0 | 0 | 0 | 0 | 0 | 0 | 0  | 0 | 0 | 0 | 0 |
|                                                                                                                                                                                                                                                                                                                                                                                                                                                                                                                                                                                                                                                                                                                                                                                                                            | 0 | 0 | 0 | 0  | 0 | 0 | 0 | 0 | 0 | 0 | 0  | 0 | 0 | 0 | 0 | 0 | 0 | 0 | 0 | 0 | 0 | 0 | 0  | 0 | 0 | 0 | 0 |
| M02255_77_000000000-ADUT3_1_1118_17544_10868 T---AC---GT-AG-GGA-----GCA-A-G-----C-G-T---T-AT-C-CGG-AT-----TT-A-C-T-GG-GT-----GT-A---AA-GG-GC-GT-----G-TA-G-G-C-G-----G--G-AT-T-G-C-----<br>-----AA---G-T-C-A-----G-A-T-G-TG--A-AA-AC--T-C-GG-A-G-----CT-C-AA-----C-T-C-C-G-A-G--C-C---T-G--C-A---T-T-----T--GA-A-A---C-----T-G-T-AG--T-T-C---T-T-G-A-G-T-G---G-TG---GA-G-A-----G-G-C-A--AA-T-----GG--A--ATT---C-<br>C-T-A-GT--GT-A-G-CG-GT-G---A-A-A---TG-C-GT-AG--AT-A-TT--A-G--G-A-A-G-A-AC-A-CC--AG--T--G--GC-GAA-G-G-C--G-----A--T-T-T-G---CTG-G--AC-A-C-----T-A---A-C-T-GA--CG-C-T-G--A-GG--C-G-CG-A-AA-G-C---G-TG--GG-G-<br>-AG-C-A-AA-----CA--GG     Bacteria(100);unclassified(100);unclassified(100);unclassified(100);unclassified(100);unclassified(100);unclassified(100);unclassified(100);unclassified(100); |   |   |   |    |   |   |   |   |   |   |    |   |   |   |   |   |   |   |   |   |   |   |    |   |   |   |   |
| Otu0763                                                                                                                                                                                                                                                                                                                                                                                                                                                                                                                                                                                                                                                                                                                                                                                                                    | 0 | 0 | 0 | 0  | 0 | 0 | 0 | 0 | 0 | 0 | 0  | 0 | 0 | 0 | 0 | 0 | 0 | 0 | 0 | 0 | 0 | 0 | 24 | 0 | 0 | 0 | 0 |
|                                                                                                                                                                                                                                                                                                                                                                                                                                                                                                                                                                                                                                                                                                                                                                                                                            | 0 | 0 | 0 | 0  | 0 | 0 | 0 | 0 | 0 | 0 | 0  | 0 | 0 | 0 | 0 | 0 | 0 | 0 | 0 | 0 | 0 | 0 | 0  | 0 | 0 | 0 | 0 |
|                                                                                                                                                                                                                                                                                                                                                                                                                                                                                                                                                                                                                                                                                                                                                                                                                            | 0 | 0 | 0 | 0  | 0 | 0 | 0 | 0 | 0 | 0 | 0  | 0 | 0 | 0 | 0 | 0 | 0 | 0 | 0 | 0 | 0 | 0 | 0  | 0 | 0 | 0 | 0 |
|                                                                                                                                                                                                                                                                                                                                                                                                                                                                                                                                                                                                                                                                                                                                                                                                                            | 0 | 0 | 0 | 0  | 0 | 0 | 0 | 0 | 0 | 0 | 0  | 0 | 0 | 0 | 0 | 0 | 0 | 0 | 0 | 0 | 0 | 0 | 0  | 0 | 0 | 0 | 0 |
| M02255_77_000000000-ADUT3_1_1112_22480_12476 T---AC---GT-AG-GGT-----CCA-A-G-----C-G-T---T-AT-C-CGG-AA-----TC-A-C-T-GG-GC-----GT-A---AA-GC-GT-GC-----G-TA-G-G-T-G-----G--A-TT-G-T-T-----<br>                                                                                                                                                                                                                                                                                                                                                                                                                                                                                                                                                                                                                                |   |   |   |    |   |   |   |   |   |   |    |   |   |   |   |   |   |   |   |   |   |   |    |   |   |   |   |



|         |                                                                                                                                                                                                                                                                                                                                                                                                                                                                                                                                                                                                                                                                                                                                                                                                                              |   |   |   |   |   |   |   |   |   |    |   |   |   |   |   |   |   |   |   |   |   |    |   |   |   |   |   |
|---------|------------------------------------------------------------------------------------------------------------------------------------------------------------------------------------------------------------------------------------------------------------------------------------------------------------------------------------------------------------------------------------------------------------------------------------------------------------------------------------------------------------------------------------------------------------------------------------------------------------------------------------------------------------------------------------------------------------------------------------------------------------------------------------------------------------------------------|---|---|---|---|---|---|---|---|---|----|---|---|---|---|---|---|---|---|---|---|---|----|---|---|---|---|---|
| Otu0765 | 0                                                                                                                                                                                                                                                                                                                                                                                                                                                                                                                                                                                                                                                                                                                                                                                                                            | 0 | 0 | 0 | 0 | 0 | 0 | 0 | 0 | 0 | 0  | 0 | 0 | 0 | 0 | 0 | 0 | 0 | 0 | 0 | 0 | 0 | 19 | 0 | 0 | 0 | 0 | 0 |
|         | 0                                                                                                                                                                                                                                                                                                                                                                                                                                                                                                                                                                                                                                                                                                                                                                                                                            | 0 | 0 | 0 | 0 | 0 | 0 | 0 | 0 | 0 | 0  | 0 | 0 | 0 | 0 | 0 | 0 | 0 | 0 | 0 | 0 | 0 | 0  | 0 | 0 | 0 | 0 |   |
|         | 0                                                                                                                                                                                                                                                                                                                                                                                                                                                                                                                                                                                                                                                                                                                                                                                                                            | 0 | 0 | 0 | 0 | 0 | 0 | 0 | 0 | 0 | 0  | 0 | 0 | 0 | 0 | 0 | 0 | 0 | 0 | 0 | 0 | 0 | 0  | 0 | 0 | 0 | 0 |   |
|         | 0                                                                                                                                                                                                                                                                                                                                                                                                                                                                                                                                                                                                                                                                                                                                                                                                                            | 0 | 0 | 0 | 0 | 0 | 0 | 0 | 0 | 0 | 0  | 0 | 0 | 0 | 0 | 0 | 0 | 0 | 0 | 0 | 0 | 0 | 0  | 0 | 0 | 0 | 0 |   |
|         | M02255_77_000000000-ADUT3_1_1112_12071_11125 T---AC---GG-AG-GAT-----CCA-A-G-----C-G--T---T--AT-C-CGG-AA-----TT-A--C-T-GG-GC-----GT-A----AA-GA-GTTGC-----G-TA-G-G-C-G-----G--C-AA-A-G-T-----AA---G-C-A-G-----G-T-A--G--TG--A-AA-GC--G-T-GT-G-G----CT-C-AA-----C-C-A-T-A-C-T--C-A---C-A--T-T--A--T-----C--TG-A-A--C-----T-G-C--TT--A-G-C---T-A-G-A-G-G--A--T-GA----GA-G-A-----G-G-T-C--AC-T-----GG-A--ATT---C-T-T-GT--GT-A-G-GA-GT--G---A--A-A---TC-C-GT-AG--AT-A-TA--A-G--G-A-G-G-A-AC-A-CC--GA--T--G--GC-GTA-G--G-C-A-----G--G-T-G-A--CTG--G--CT-C-A-----T-T--C-C-T-GA--CG-C-T-C--A-GG--C-A-CG-A--AA-G-C---G-TG--GG-G--AG-C-A-AA-----CG--GG Bacteria(100);Candidate_division_TM7(100);unclassified(100);unclassified(100);unclassified(100);unclassified(100);unclassified(100);unclassified(100);unclassified(100);         |   |   |   |   |   |   |   |   |   |    |   |   |   |   |   |   |   |   |   |   |   |    |   |   |   |   |   |
| Otu0766 | 0                                                                                                                                                                                                                                                                                                                                                                                                                                                                                                                                                                                                                                                                                                                                                                                                                            | 0 | 0 | 0 | 0 | 0 | 0 | 0 | 0 | 0 | 0  | 0 | 0 | 0 | 0 | 0 | 0 | 0 | 0 | 0 | 0 | 0 | 1  | 0 | 0 | 0 | 0 | 6 |
|         | 1                                                                                                                                                                                                                                                                                                                                                                                                                                                                                                                                                                                                                                                                                                                                                                                                                            | 0 | 0 | 0 | 0 | 0 | 0 | 0 | 0 | 0 | 0  | 0 | 0 | 0 | 0 | 0 | 0 | 0 | 0 | 0 | 0 | 0 | 0  | 0 | 0 | 0 | 0 |   |
|         | 0                                                                                                                                                                                                                                                                                                                                                                                                                                                                                                                                                                                                                                                                                                                                                                                                                            | 0 | 0 | 0 | 0 | 0 | 0 | 0 | 0 | 0 | 0  | 0 | 0 | 0 | 0 | 0 | 0 | 0 | 0 | 0 | 0 | 0 | 0  | 0 | 0 | 0 | 0 |   |
|         | 0                                                                                                                                                                                                                                                                                                                                                                                                                                                                                                                                                                                                                                                                                                                                                                                                                            | 0 | 0 | 0 | 0 | 0 | 0 | 0 | 0 | 0 | 0  | 0 | 0 | 0 | 0 | 0 | 0 | 0 | 0 | 0 | 0 | 0 | 0  | 0 | 0 | 0 | 0 |   |
|         | M02255_76_000000000-ADUNE_1_2101_16763_16254 TG---AC---AG-AA-GAA-----GCA-C-C-----G-G-C---T-AACT-CCG-TG-----CC-A--G-C-AG-CC-----GC--G----GT-AA-TA-CG-----G-AG-G-G-T-GC-----G--A-GC-G-T-T-----AA---T-C-G-A-----G-A-A--G--TG--A-AA-GC--C-C-CG-G-G----CT-C-AA-----C-C-T-G-G-G-A--A-C---T-G--C-A--T-T-----T--CG-A-A--C-----T--G-G--CA--A-A-C---T-A-G-A-G-T--G--T-GA----TA-G-A-----G-G-G-T--GG-T-----AG--A--ATT---T-C-A-G-GT--GT-A-G-CG-GT--G---A--A-A---TG-C-GT-AG--AG-A-TC--T-G--A-A-G-G-A-AT-A-CC--GA--T--G--GC-GAA-G--G-C-A-----G--C-C-A-C---CTG--G--GT-C-A-----A-C--A-C-T-GA--CG-C-T-C--A-TG--T-A-CG-A--AA-G-C---G-TG--GG-G--AG-C-A-AA-----CG--GG Bacteria(100);Proteobacteria(100);Gammaproteobacteria(100);Alteromonadales(100);unclassified(100);unclassified(100);unclassified(100);unclassified(100);unclassified(100);  |   |   |   |   |   |   |   |   |   |    |   |   |   |   |   |   |   |   |   |   |   |    |   |   |   |   |   |
| Otu0767 | 0                                                                                                                                                                                                                                                                                                                                                                                                                                                                                                                                                                                                                                                                                                                                                                                                                            | 0 | 0 | 0 | 0 | 0 | 0 | 0 | 0 | 0 | 0  | 0 | 0 | 0 | 0 | 0 | 0 | 0 | 0 | 0 | 0 | 0 | 0  | 0 | 0 | 0 | 0 |   |
|         | 0                                                                                                                                                                                                                                                                                                                                                                                                                                                                                                                                                                                                                                                                                                                                                                                                                            | 0 | 0 | 0 | 0 | 0 | 0 | 0 | 0 | 0 | 0  | 0 | 0 | 0 | 0 | 0 | 0 | 0 | 0 | 0 | 0 | 0 | 0  | 0 | 0 | 0 | 0 |   |
|         | 0                                                                                                                                                                                                                                                                                                                                                                                                                                                                                                                                                                                                                                                                                                                                                                                                                            | 0 | 0 | 0 | 0 | 0 | 0 | 0 | 0 | 0 | 0  | 0 | 0 | 0 | 0 | 0 | 0 | 0 | 0 | 0 | 0 | 0 | 0  | 0 | 0 | 0 | 0 |   |
|         | 0                                                                                                                                                                                                                                                                                                                                                                                                                                                                                                                                                                                                                                                                                                                                                                                                                            | 0 | 0 | 0 | 0 | 0 | 0 | 2 | 0 | 0 | 0  | 1 | 0 | 0 | 0 | 0 | 0 | 0 | 0 | 0 | 0 | 0 | 0  | 0 | 0 | 0 | 0 |   |
|         | M02255_77_000000000-ADUT3_1_2109_8979_20201 T---AA---GC-AC-CGG-----CTA-A-C-----T--A--C---G-TG-C-CAG-CA-----GC-C--G-C--GG-TA-----AT--A----CG-TA-GG-GT-----G-CA-A-G-C-G-----T--T-AA-T-C-G-----GA-----A-T-T-----A-C-T--G--TG--A-AA-TC--C-C-CG-G-G----CT-C-AA-----C-C-T-G-G-G-A--A-C---T-G--C-A--T-T-----T--GT-G-A--C-----T--G-T--AT--A-G-C---T-A-G-A-G-T--A--C-GG---TA-G-A-----G-G-G-G--GA-T-----GG--A--ATT---C-C-G-C-GT--GT-A-G-CA-GT--G---A--A-A---TG-C-GT-AG--AT-A-TG--C-G--G-A-G-G-A-AC-A-CC--GA--T--G--GC-GAA-G--G-C-A-----A--T-C-C-C---CTG--G--AC-C-T-----G-T--A-C-T--GA--CG-C-T-C--A-TG--C-A-CG-A--AA-G-C---G-TG--GG-G--AG-C-A-AA-----CA--GG Bacteria(100);Proteobacteria(100);Betaproteobacteria(100);Burkholderiales(100);Comamonadaceae(100);unclassified(100);unclassified(100);unclassified(100);unclassified(100); |   |   |   |   |   |   |   |   |   |    |   |   |   |   |   |   |   |   |   |   |   |    |   |   |   |   |   |
| Otu0768 | 0                                                                                                                                                                                                                                                                                                                                                                                                                                                                                                                                                                                                                                                                                                                                                                                                                            | 0 | 0 | 0 | 0 | 0 | 0 | 0 | 0 | 0 | 0  | 0 | 0 | 0 | 0 | 0 | 0 | 0 | 0 | 0 | 0 | 0 | 0  | 0 | 0 | 0 | 0 |   |
|         | 0                                                                                                                                                                                                                                                                                                                                                                                                                                                                                                                                                                                                                                                                                                                                                                                                                            | 0 | 0 | 0 | 0 | 0 | 0 | 0 | 0 | 0 | 24 | 0 | 0 | 0 | 0 | 0 | 0 | 0 | 0 | 0 | 0 | 0 | 0  | 0 | 0 | 0 | 0 |   |
|         | 0                                                                                                                                                                                                                                                                                                                                                                                                                                                                                                                                                                                                                                                                                                                                                                                                                            | 0 | 0 | 0 | 0 | 0 | 0 | 0 | 0 | 0 | 0  | 0 | 0 | 0 | 0 | 0 | 0 | 0 | 0 | 0 | 0 | 0 | 0  | 0 | 0 | 0 | 0 |   |
|         | 0                                                                                                                                                                                                                                                                                                                                                                                                                                                                                                                                                                                                                                                                                                                                                                                                                            | 0 | 0 | 0 | 0 | 0 | 0 | 0 | 0 | 0 | 0  | 0 | 0 | 0 | 0 | 0 | 0 | 0 | 0 | 0 | 0 | 0 | 0  | 0 | 0 | 0 | 0 |   |
|         | M02255_77_000000000-ADUT3_1_1112_3979_11475 T---AC---GT-AG-GGG-----GCG-A-G-----C-G--T---T--AT-C-CGG-AA-----TT-A--T-T--GG-G                                                                                                                                                                                                                                                                                                                                                                                                                                                                                                                                                                                                                                                                                                   |   |   |   |   |   |   |   |   |   |    |   |   |   |   |   |   |   |   |   |   |   |    |   |   |   |   |   |



Otu0770      0      0      0      0      0      0      0      0      0      0      0      0      0      0      0      0      0      0      0      0      0      0      0      0      0      0      0  
             0      0      0      0      0      0      0      0      0      0      0      34      0      0      0      0      0      0      0      0      0      0      0      0      0      0      0  
             0      0      0      0      0      0      0      0      0      0      0      0      0      0      0      0      0      0      0      0      0      0      0      0      0      0      0      0  
             0      0      0      0      0      0      0      0      0      0      0      0      0      0      0      0      0      0      0      0      0      0      0      0      0      0      0  
             M02255\_77\_000000000-ADUT3\_1\_1111\_23758\_5762 T---AC---GT-AG-GTG-----GCG-A-G-----C--G--T---T--AT-C-CGG-AT-----TT-A--C-T--GG-GC-----GT--A-----AA-GC-GC-GC-----G-CA-G-G-C-G-----G--C-TG-T-T-C-----AA-  
---G-T-C-C-----G-A-T--G--TG--A-AA-TC--T-T-CC-G-G-----CT-T-AA-----C-T-G-G-A-A-A--A-C---G-G--C-A--T--C-----G--GA-T-A--C-----T--G-G--AC-G-G-C---T-G-G-A-A-G--G---T-GG-----GA-G-A-----G-G-G-T--AG-C-----GG--A--ATT---C-C-C-G-  
GT--GT-A-G-TG-GT--G---A--A---TG-C-GT-AG--AT-A-TC--G-G--G-A-G-G-A-AC-A-CC---AG--T--G--GC-GAA-A--G-C-G-----G--C-T-A-C---CTG--G--CC-C-A-----C-T---C-T-T--GA--CG-C-T-G--A-GG--C-G-CG-A-AA-G-C---T-AG--GG-G--AG-  
C-A-AA-----CG--GG      Bacteria(100);unclassified(100);unclassified(100);unclassified(100);unclassified(100);unclassified(100);unclassified(100);unclassified(100);unclassified(100);

Otu0771      0      0      0      0      0      0      0      0      0      0      0      0      0      0      0      0      0      0      0      0      0      0      0      0      0      0      0  
             0      0      0      0      0      0      0      0      0      0      0      35      0      0      0      0      0      0      0      0      0      0      0      0      0      0      0  
             0      0      0      0      0      0      0      0      0      0      0      0      0      0      0      0      0      0      0      0      0      0      0      0      0      0      0      0  
             0      0      0      0      0      0      0      0      0      0      0      0      0      0      0      0      0      0      0      0      0      0      0      0      0      0      0  
             M02255\_77\_000000000-ADUT3\_1\_2111\_6066\_10438 T---AC---GT-AG-GGG-----GCG-A-G-----C--G--T---T--GT-C-CGG-AA-----TT-A--C-T--GG-GC-----GT--A-----AA-GG-GT-GC-----G-TA-G-G-C-G-----G--C-CA-T-T-T-----  
AA---G-T-C-C-----T-G-T--G--TG--A-AA-GG--C-C-CC-G-G-----CT-T-AA-----C-C-G-G-G-G-A--G-----G-GC-C-A--T--G-----G--GA-A-A--C-----T--G-G--AT--G-G-C---T-T-G-A-G-T--G---C-CG-----GA-G-A-----G-G-G-T--GG-C-----GG--A--ATT---C-C-  
C-G-GT--GT-A-G-CG-GT--G---A--A---TG-C-GT-AG--AT-A-TC--G-G--G-A-G-G-A-AC-A-CC---AG--T--G--GC-GAA-G--G-C-G-----G--C-C-A-C---CTG--G--AC-G-G-----T-A--A-C-T--GA--CG-C-T-G--A-GG--C-A-CG-A--CA-G-C---T-GG--GG-G--  
AG-C-A-AA-----CA--GG      Bacteria(100);unclassified(100);unclassified(100);unclassified(100);unclassified(100);unclassified(100);unclassified(100);unclassified(100);unclassified(100);

Otu0772      0      0      0      0      0      0      0      0      0      0      0      0      0      0      0      0      0      0      0      0      0      0      0      0      0      0      0  
             0      0      0      0      0      0      0      0      0      0      0      21      0      0      0      0      0      0      0      0      0      0      0      0      0      0      0  
             0      0      0      0      0      0      0      0      0      0      0      0      0      0      0      0      0      0      0      0      0      0      0      0      0      0      0      0  
             0      0      0      0      0      0      0      0      0      0      0      0      0      0      0      0      0      0      0      0      0      0      0      0      0      0      0  
             M02255\_77\_000000000-ADUT3\_1\_1115\_25201\_8853 T---AC---GG-AG-GGG-----GCT-A-G-----C--G--T---T--GT-T-CGG-AA-----TT-A--C-T--GG-GC-----GT--A-----AA-GC-GC-GC-----G-TA-G-G-C-G-----G--A-TC-T-G-C-----  
AA---G-T-C-A-----G-G-G--G--TG--A-AA-TC--C-C-GA-G-G-----CT-C-AA-----C-C-T-C-G-G-A--A-C---T-G--C-C---T--T-----T--GA-T-A--C-----T--G-C--GG--A-T-C---T-T-G-A-G-T--C---C-GA-----GA-G-A-----G-G-T-G--AG-T-----GG--A--ATT---C-C-T-  
A-GT--GT-A-G-AG-GT--G---A--A---TT-C-GT-AG--AT-A-TT--A-G--G-A-A-G-A-AC-A-CC---AG--T--G--GC-GAA-G--G-C-G-----G--C-T-C-A---CTG--G--CT-C-G-----G-T---A-C-T--GA--CG-C-T-G--A-GG--C-G-CG-A-AA-G-C---G-TG--GG-G--  
AG-C-A-AA-----CA--GG      Bacteria(100);Proteobacteria(100);Alphaproteobacteria(100);unclassified(100);unclassified(100);unclassified(100);unclassified(100);unclassified(100);unclassified(100);

Otu0773      0      0      0      0      0      0      0      0      0      0      0      0      0      0      0      0      0      0      0      0      0      0      0      12      0      0      0      0      0  
             0      0      0      0      0      0      0      0      0      0      0      0      0      0      0      0      0      0      0      0      0      0      0      0      0      0      0      0  
             0      0      0      0      0      0      0      0      0      0      0      0      0      0      0      0      0      0      0      0      0      0      0      0      0      0      0      0  
             0      0      0      0      0      0      0      0      0      0      0      0      0      0      0      0      0      0      0      0      0      0      0      0      0      0      0  
             M02255\_77\_000000000-ADUT3\_1\_1106\_7183\_20466 T---AC---AG-AG-ACC-----TCA-A-G-----C--G--T---T--AT-C-CGG-AT-----TT-A--T-T--GG-GC-----GT--A-----AA-GG-GT-CC-----G-CA-G-G-T-G-----G--C-TG-T-G-T-----AA--  
--G-T-C-A-----T-G-C--G--TC--A-AA-TC--T-C-TG-G-G-----CT-C-AA-----C-C-C-A-G-A-A--A-C---C-G--C-G---T--G-----T--GA-T-A--C-----T--G-C--GC--A-G-C---T-A-G-A-G-G--C---T-GG-----GA-G-A-----G-G-T-G--CA-C-----GG--A--ATT---A-C-T-G-  
GT--GT-A-G-CG-GT--A---A--A---TG-C-GT-TA--AT-A-TC--A-G--T-A-A-G-A-AC-A-CC---AA--A--G--GC-GAA-G--G-C--A-----G--T-G-C-A---CTG--G--AA-C-A-----G-T---C-C-T--GA--CA-C-T-C--A-GG--G-A-CG-A-AA-G-C---G-TG--GG-G--AG-C-  
G-AA-----AG--GG      Bacteria(100);unclassified(100);unclassified(100);unclassified(100);unclassified(100);unclassified(100);unclassified(100);unclassified(100);unclassified(100);

Otu0774      0      0      0      0      0      0      0      0      0      0      0      0      0      0      0      0      0      0      0      0      0      0      0      21      0      0      0      0      0  
             0      0      0      0      0      0      0      0      0      0      0      0      0      0      0      0      0      0      0      0      0      0      0      0      0      0      0      0  
             0      0      0      0      0      0      0      0      0      0      0      0      0      0      0      0      0      0      0      0      0      0      0      0      0      0      0      0  
             0      0      0      0      0      0      0      0      0      0      0      0      0      0      0      0      0      0      0      0      0      0      0      0      0      0      0  
             M02255\_77\_000000000-ADUT3\_1\_1109\_5524\_12893 T---AC---AG-AG-GTC-----TCA-A-G-----C--G--T---T--GT-T-CGG-AT-----TC-A--T-T--GG-GC-----GT--A-----AA-GG-GT-GC-----G-TA-G-G-T-G-----G--T-CA-T-G-T-----AA--  
--G-T-C-T-----A-A-T--G--TG--A-AA-TC--T-C-GG-G-G-----CT-T-AA-----C-C-C-C-G-A-A--A-T---T-G--C-A--T--C-----G--GA-T-A--C-----T--G-C--GT--G-A-C---T-A-G-A-G-G--A--T-TG-----TA-G-A-----G-G-A-G--AT-T-----GG--A--ATT---C-A-C-G-  
GT--GT-A-G-CA-GT--G---A--A---TG-C-GT-AG--AT-A-TC--G-T--G-A-G-G-A-AG-A-CC---AG--T--T--GC-GAA-G--G-C-G-----A--A-T-C-T---CTG--G--GC-A-A-----T-T---C-C-T--GA--CA-C-T-G--A-GG--C-A-CG-A--AG-G-C---C-AG--GG-G--AG-C-  
A-AA-----CG--GG      Bacteria(100);Verrucomicrobia(100);Spartobacteria(100);unclassified(100);unclassified(100);unclassified(100);unclassified(100);unclassified(100);unclassified(100);



|         |                                                                                                                                                                                                                                                                                                                                                                                                                                                                                                                                                                                                                                                                                                                                                                                                                        |   |   |   |   |   |   |   |   |   |    |   |   |     |   |   |   |   |   |   |   |   |   |   |   |   |   |  |
|---------|------------------------------------------------------------------------------------------------------------------------------------------------------------------------------------------------------------------------------------------------------------------------------------------------------------------------------------------------------------------------------------------------------------------------------------------------------------------------------------------------------------------------------------------------------------------------------------------------------------------------------------------------------------------------------------------------------------------------------------------------------------------------------------------------------------------------|---|---|---|---|---|---|---|---|---|----|---|---|-----|---|---|---|---|---|---|---|---|---|---|---|---|---|--|
| Otu0775 | 0                                                                                                                                                                                                                                                                                                                                                                                                                                                                                                                                                                                                                                                                                                                                                                                                                      | 0 | 0 | 0 | 0 | 0 | 0 | 0 | 0 | 0 | 0  | 0 | 0 | 0   | 0 | 0 | 0 | 0 | 0 | 0 | 0 | 0 | 0 | 0 | 0 | 0 | 0 |  |
|         | 0                                                                                                                                                                                                                                                                                                                                                                                                                                                                                                                                                                                                                                                                                                                                                                                                                      | 0 | 0 | 0 | 0 | 0 | 0 | 0 | 0 | 0 | 25 | 0 | 0 | 0   | 0 | 0 | 0 | 0 | 0 | 0 | 0 | 0 | 0 | 0 | 0 | 0 | 0 |  |
|         | 0                                                                                                                                                                                                                                                                                                                                                                                                                                                                                                                                                                                                                                                                                                                                                                                                                      | 0 | 0 | 0 | 0 | 0 | 0 | 0 | 0 | 0 | 0  | 0 | 0 | 0   | 0 | 0 | 0 | 0 | 0 | 0 | 0 | 0 | 0 | 0 | 0 | 0 | 0 |  |
|         | 0                                                                                                                                                                                                                                                                                                                                                                                                                                                                                                                                                                                                                                                                                                                                                                                                                      | 0 | 0 | 0 | 0 | 0 | 0 | 0 | 0 | 0 | 0  | 0 | 0 | 0   | 0 | 0 | 0 | 0 | 0 | 0 | 0 | 0 | 0 | 0 | 0 | 0 | 0 |  |
|         | M02255_77_000000000-ADUT3_1_2101_20932_16178 G---AC---GG-AG-GGT-----GCT-A-G-----C-G-T---T-GT-T-CGG-AA-----TC-A-C-T-GG-GC-----GT--A---AA-GG-GC-GC-----G-TA-G-G-C-G-----G-C-CA-A-G-G-----AA-G-T-C-G-----G-A-T-G-TG--A-AA-GC--C-C-GG-G-G-----CT-C-AA-----C-C-T-C-G-G-A--G-G---T-G-C-A--T-C-----C-GA-G-A--C-----T-C-T-TT--G-G-C---T-G-G-A-G-G--C---C-GG---AA-G-A-----G-G-A-G--GG-T-----GG-A-ATA---C-C-C-A-GT--GT-A-G-AG-GT--G--A-A-A---TT-C-GT-AG--AT-A-TT--G-G--G-T-G-G-A-AC-A-CC---GG--T--G--GC-GAA-A--G-C-G-----G-C-T-C-T---CTG--G--TC-C-G-----G-A--C-C-T--GA--CG-C-T-G--A-GG--C-G-CG-A-AA-G-C---G-T-G-GG-G--AG-C-A-AA-----CA--GG Bacteria(100);Proteobacteria(100);Alphaproteobacteria(100);unclassified(100);unclassified(100);unclassified(100);unclassified(100);unclassified(100);unclassified(100);               |   |   |   |   |   |   |   |   |   |    |   |   |     |   |   |   |   |   |   |   |   |   |   |   |   |   |  |
| Otu0776 | 0                                                                                                                                                                                                                                                                                                                                                                                                                                                                                                                                                                                                                                                                                                                                                                                                                      | 0 | 0 | 0 | 0 | 0 | 0 | 0 | 0 | 0 | 0  | 0 | 0 | 0   | 0 | 0 | 0 | 0 | 0 | 0 | 0 | 0 | 6 | 0 | 0 | 0 | 0 |  |
|         | 0                                                                                                                                                                                                                                                                                                                                                                                                                                                                                                                                                                                                                                                                                                                                                                                                                      | 0 | 0 | 0 | 0 | 0 | 0 | 0 | 0 | 0 | 0  | 0 | 0 | 0   | 0 | 0 | 0 | 0 | 0 | 0 | 0 | 0 | 0 | 0 | 0 | 0 | 0 |  |
|         | 4                                                                                                                                                                                                                                                                                                                                                                                                                                                                                                                                                                                                                                                                                                                                                                                                                      | 0 | 0 | 0 | 0 | 0 | 0 | 0 | 6 | 1 | 0  | 2 | 0 | 0   | 0 | 0 | 0 | 0 | 0 | 0 | 0 | 0 | 0 | 0 | 0 | 0 | 0 |  |
|         | 0                                                                                                                                                                                                                                                                                                                                                                                                                                                                                                                                                                                                                                                                                                                                                                                                                      | 0 | 0 | 0 | 0 | 0 | 0 | 0 | 0 | 0 | 0  | 0 | 0 | 0   | 0 | 0 | 0 | 0 | 0 | 0 | 0 | 0 | 0 | 0 | 0 | 0 | 0 |  |
|         | M02255_77_000000000-ADUT3_1_2114_4055_16501 T---AC---GT-AG-GGT-----CCG-A-G-----C-G-T---T-GT-C-CGG-AA-----TT-A-T-T-GG-GC-----GT--A---AA-GG-GC-TC-----G-TA-G-G-C-G-----G-T-CT-G-T-T-----GC---G-T-C-G-----G-G-A-G-TG--A-AA-AC--C-C-AG-G-G-----CT-T-AA-----C-C-C-T-G-G-G--C-C---T-G-C-T---T-T-----C-GA-T-A--C-----G-G-G--CA-G-A-C---T-A-G-A-G-G--C---A-TT---CA-G-G-----G-G-A-G--AA-C-----GG--A-ATT---C-C-T-G-GT--GT-A-G-CG-GT--G--A-A-A---TG-C-GC-AG--AT-A-TC--A-G--G-A-G-G-A-AC-A-CC---GG--T--G--GC-GAA-G--G-C-G-----G-T-T-C-T---CTG--G--GA-A-T-----G-T---T-C-T-GA--CG-C-T-G--A-GG--A-G-CG-A-AA-G-T---G-TG--GG-G--AG-C-G-AA-----CA--GG Bacteria(100);Actinobacteria(100);Actinobacteria(100);Actinobacteridae(100);Actinomycetales(100);Propionibacterineae(100);Nocardiodaceae(100);Nocardioides(100);unclassified(100); |   |   |   |   |   |   |   |   |   |    |   |   |     |   |   |   |   |   |   |   |   |   |   |   |   |   |  |
| Otu0777 | 0                                                                                                                                                                                                                                                                                                                                                                                                                                                                                                                                                                                                                                                                                                                                                                                                                      | 0 | 0 | 0 | 0 | 0 | 0 | 0 | 0 | 0 | 0  | 0 | 0 | 0   | 0 | 0 | 0 | 0 | 0 | 0 | 0 | 0 | 8 | 0 | 0 | 0 | 0 |  |
|         | 0                                                                                                                                                                                                                                                                                                                                                                                                                                                                                                                                                                                                                                                                                                                                                                                                                      | 0 | 0 | 0 | 0 | 0 | 0 | 0 | 0 | 0 | 0  | 0 | 0 | 0   | 0 | 0 | 0 | 0 | 0 | 0 | 0 | 0 | 0 | 0 | 0 | 0 | 0 |  |
|         | 0                                                                                                                                                                                                                                                                                                                                                                                                                                                                                                                                                                                                                                                                                                                                                                                                                      | 0 | 0 | 0 | 0 | 0 | 0 | 0 | 0 | 0 | 0  | 0 | 0 | 0   | 0 | 0 | 0 | 0 | 0 | 0 | 0 | 0 | 0 | 0 | 0 | 0 | 0 |  |
|         | 0                                                                                                                                                                                                                                                                                                                                                                                                                                                                                                                                                                                                                                                                                                                                                                                                                      | 0 | 0 | 0 | 0 | 0 | 0 | 0 | 0 | 0 | 0  | 0 | 0 | 0   | 0 | 0 | 0 | 0 | 0 | 0 | 0 | 0 | 0 | 0 | 0 | 0 | 0 |  |
|         | M02255_77_000000000-ADUT3_1_1110_17222_7181 T---AC---GG-AG-GGG-----GTT-A-G-----C-G-T---T-GT-T-CGG-AA-----TT-A-C-T-GG-GC-----GT--A---AA-GC-GC-AC-----G-TA-G-G-C-G-----G--A-TC-A-A-T-----AA---G-T-T-A-----G-A-G-G-TG--A-AA-TC--C-C-GG-G-G-----CT-C-AA-----C-C-C-C-G-G-A--A-C---T-G-C-C---T-T-----T-AA-T-A--C-----T-G-T-TG--A-T-C---T-A-G-A-G-T-T---C-GA---GA-G-A-----G-G-T-A--AG-T-----GG--A-ATT---C-C-G-A-GT--GT-A-G-AG-GT--G--A-A-A---TT-C-GT-AG--AT-A-TT--C-G--G-A-G-G-A-AC-A-CC---AG--T--G--GC-GAA-G--G-C-G-----G-C-T-T-A---CTG--G--CT-C-G-----A-T---A-C-T-GA--CG-C-T-G--A-GG--T-G-CG-A-AA-G-T---G-TG--GG-G--AG-C-A-AA-----CA--GG Bacteria(100);Proteobacteria(100);Alphaproteobacteria(100);Rhodobacterales(100);Rhodobacteraceae(100);unclassified(100);unclassified(100);unclassified(100);unclassified(100);     |   |   |   |   |   |   |   |   |   |    |   |   |     |   |   |   |   |   |   |   |   |   |   |   |   |   |  |
| Otu0778 | 0                                                                                                                                                                                                                                                                                                                                                                                                                                                                                                                                                                                                                                                                                                                                                                                                                      | 0 | 0 | 0 | 0 | 0 | 0 | 0 | 0 | 0 | 0  | 0 | 0 | 0   | 0 | 0 | 0 | 0 | 0 | 0 | 0 | 0 | 0 | 0 | 0 | 0 | 0 |  |
|         | 0                                                                                                                                                                                                                                                                                                                                                                                                                                                                                                                                                                                                                                                                                                                                                                                                                      | 0 | 0 | 0 | 0 | 0 | 0 | 0 | 0 | 0 | 37 | 0 | 0 | 123 | 0 | 0 | 0 | 0 | 0 | 0 | 0 | 0 | 0 | 0 | 0 | 0 | 0 |  |
|         | 0                                                                                                                                                                                                                                                                                                                                                                                                                                                                                                                                                                                                                                                                                                                                                                                                                      | 0 | 0 | 0 | 0 | 0 | 0 | 0 | 0 | 0 | 0  | 0 | 0 | 0   | 0 | 0 | 0 | 0 | 0 | 0 | 0 | 0 | 0 | 0 | 0 | 0 | 0 |  |
|         | 0                                                                                                                                                                                                                                                                                                                                                                                                                                                                                                                                                                                                                                                                                                                                                                                                                      | 0 | 0 | 0 | 0 | 0 | 0 | 0 | 0 | 0 | 0  | 0 | 0 | 0   | 0 | 0 | 0 | 0 | 0 | 0 | 0 | 0 | 0 | 0 | 0 | 0 | 0 |  |
|         | M02255_77_000000000-ADUT3_1_1108_2297_12960 T---AC---GT-AG-GCA-----GCG-A-G-----C-G-T---T-GT-T-CGG-AG-----TT-A-C-T-GG-GC-----GT--A---AA-GC-GT-GC-----G-TA-G                                                                                                                                                                                                                                                                                                                                                                                                                                                                                                                                                                                                                                                             |   |   |   |   |   |   |   |   |   |    |   |   |     |   |   |   |   |   |   |   |   |   |   |   |   |   |  |



|                                                                                                                                                                                                                                                                                                                                                                                                                                                                                                                                                                                                                                                                                                                                                                                                                  |   |   |   |   |   |   |   |   |   |   |    |   |   |   |   |   |    |   |   |   |   |   |   |   |   |   |   |
|------------------------------------------------------------------------------------------------------------------------------------------------------------------------------------------------------------------------------------------------------------------------------------------------------------------------------------------------------------------------------------------------------------------------------------------------------------------------------------------------------------------------------------------------------------------------------------------------------------------------------------------------------------------------------------------------------------------------------------------------------------------------------------------------------------------|---|---|---|---|---|---|---|---|---|---|----|---|---|---|---|---|----|---|---|---|---|---|---|---|---|---|---|
| Otu0780                                                                                                                                                                                                                                                                                                                                                                                                                                                                                                                                                                                                                                                                                                                                                                                                          | 0 | 0 | 0 | 0 | 0 | 0 | 0 | 0 | 0 | 0 | 0  | 0 | 0 | 0 | 0 | 0 | 0  | 0 | 0 | 0 | 0 | 0 | 0 | 0 | 0 | 0 | 0 |
|                                                                                                                                                                                                                                                                                                                                                                                                                                                                                                                                                                                                                                                                                                                                                                                                                  | 0 | 0 | 0 | 0 | 0 | 0 | 0 | 0 | 0 | 0 | 26 | 0 | 0 | 0 | 0 | 0 | 0  | 0 | 0 | 0 | 0 | 0 | 0 | 0 | 0 | 0 | 0 |
|                                                                                                                                                                                                                                                                                                                                                                                                                                                                                                                                                                                                                                                                                                                                                                                                                  | 0 | 0 | 0 | 0 | 0 | 0 | 0 | 0 | 0 | 0 | 0  | 0 | 0 | 0 | 0 | 0 | 21 | 0 | 0 | 0 | 0 | 0 | 0 | 0 | 0 | 0 | 0 |
|                                                                                                                                                                                                                                                                                                                                                                                                                                                                                                                                                                                                                                                                                                                                                                                                                  | 0 | 0 | 0 | 0 | 0 | 0 | 0 | 0 | 0 | 0 | 0  | 0 | 0 | 0 | 0 | 0 | 0  | 0 | 0 | 0 | 0 | 0 | 0 | 0 | 0 | 0 | 0 |
| M02255_76_000000000-ADUNE_1_1111_8402_15885 C---TA---AC-TC-TGT-----GCC-A-G-----C---A---G--CC-G-CGG-TA-----AT-A-C-A-GA-GA-----CT-G---CA--A-GC-GT-----T-AT-T-C-G-G-----A--T-TG-G-G-T-----GT-----G-T-C-A-----G-A-T--G--TG--A-AA-TC--C-C-GA-G-G----CT-C-AA-----C-C-T-C-G-G-A-A-C---T-G--C-G---T-C-----T--GA-A-A--C-----T-A-C--TC--G-A-C---T-A-G-A-G-T--A--C-TG---GA-G-A-----G-G-G-T--AA-C-----GG--A--ATT---C-A-C-G-GT---GT-A-G-CA-GT--G---A--A-A---TG-C-GT-AG--AT-A-TC--G-T--G-A-G-G-A-AC-A-CC--AG--A--G--GC-GAA-G-G-C-G-----G--T-T-A-C---CTG--G--AC-A-G-----T-T--A-C-T-GA--CG-C-T-C--A-GG--C-A-CG-A-AA-G-C--A-TG--GG-G--AG-C-A-AA-----AG--GG Bacteria(100);Verrucomicrobia(100);Opitutae(100);Opitutales(100);Opitutaceae(100);Opitutus(100);unclassified(100);unclassified(100);unclassified(100);                 |   |   |   |   |   |   |   |   |   |   |    |   |   |   |   |   |    |   |   |   |   |   |   |   |   |   |   |
| Otu0781                                                                                                                                                                                                                                                                                                                                                                                                                                                                                                                                                                                                                                                                                                                                                                                                          | 0 | 0 | 0 | 0 | 0 | 0 | 0 | 0 | 0 | 0 | 0  | 0 | 0 | 0 | 0 | 0 | 0  | 0 | 0 | 0 | 0 | 0 | 0 | 0 | 0 | 0 | 0 |
|                                                                                                                                                                                                                                                                                                                                                                                                                                                                                                                                                                                                                                                                                                                                                                                                                  | 0 | 0 | 0 | 0 | 0 | 0 | 0 | 0 | 0 | 0 | 19 | 0 | 0 | 0 | 0 | 0 | 0  | 0 | 0 | 0 | 0 | 0 | 0 | 0 | 0 | 0 | 0 |
|                                                                                                                                                                                                                                                                                                                                                                                                                                                                                                                                                                                                                                                                                                                                                                                                                  | 0 | 0 | 0 | 0 | 0 | 0 | 0 | 0 | 0 | 0 | 0  | 0 | 0 | 0 | 0 | 0 | 0  | 0 | 0 | 0 | 0 | 0 | 0 | 0 | 0 | 0 | 0 |
|                                                                                                                                                                                                                                                                                                                                                                                                                                                                                                                                                                                                                                                                                                                                                                                                                  | 0 | 0 | 0 | 0 | 0 | 0 | 0 | 0 | 0 | 0 | 0  | 0 | 0 | 0 | 0 | 0 | 0  | 0 | 0 | 0 | 0 | 0 | 0 | 0 | 0 | 0 | 0 |
| M02255_77_000000000-ADUT3_1_1110_26460_11965 T---AC---GT-AG-GGA-----GCA-A-G-----C--G--T---T--GT-C-CGG-AA-----TT-A--C-T-GG-GT-----GT--A---AA-GG-GT-GC-----G-TA-G-G-C-G-----G--C-CC-T-G-C-----AA---G-T-C-A-----G-G-C--G--TG--A-AA-AC--C-A-TG-G-G----CT-C-AA-----C-C-C-G-T-G-G--A-C---T-G--C-G---T-T-----T--GA-A-A--C-----T--G-T--GG--G-G-C---T-T-G-A-G-T--G--A-AG---TA-G-A-----G-G-T-A--GG-C-----GG--A--ATT---C-C-C-G-GT--GT-A-G-CG-GT--G---A--A-A---TG-C-GT-AG--AG-A-TC--G-G--G-A-G-G-A-AC-A-CC--AG--T--G--GC-GAA-G-G-C-G-----G--C-C-T-A---CTG--G--GC-T-T-----T-A--A-C-T-GA--CG-C-T-G--A-GG--C-A-CG-A-AA-G-C--A-TG--GG-T--AG-C-A-AA-----CA--GG Bacteria(100);unclassified(100);unclassified(100);unclassified(100);unclassified(100);unclassified(100);unclassified(100);unclassified(100);                       |   |   |   |   |   |   |   |   |   |   |    |   |   |   |   |   |    |   |   |   |   |   |   |   |   |   |   |
| Otu0782                                                                                                                                                                                                                                                                                                                                                                                                                                                                                                                                                                                                                                                                                                                                                                                                          | 0 | 0 | 0 | 0 | 0 | 0 | 0 | 0 | 0 | 0 | 0  | 0 | 0 | 0 | 0 | 0 | 0  | 0 | 0 | 0 | 0 | 0 | 0 | 0 | 0 | 0 | 0 |
|                                                                                                                                                                                                                                                                                                                                                                                                                                                                                                                                                                                                                                                                                                                                                                                                                  | 0 | 0 | 0 | 0 | 0 | 0 | 0 | 0 | 0 | 0 | 0  | 0 | 0 | 0 | 0 | 0 | 0  | 0 | 0 | 0 | 0 | 0 | 0 | 0 | 0 | 3 | 0 |
|                                                                                                                                                                                                                                                                                                                                                                                                                                                                                                                                                                                                                                                                                                                                                                                                                  | 0 | 0 | 0 | 0 | 0 | 0 | 0 | 0 | 0 | 0 | 0  | 0 | 0 | 0 | 0 | 3 | 0  | 0 | 0 | 3 | 0 | 0 | 0 | 0 | 0 | 0 | 0 |
|                                                                                                                                                                                                                                                                                                                                                                                                                                                                                                                                                                                                                                                                                                                                                                                                                  | 0 | 0 | 0 | 0 | 0 | 7 | 0 | 0 | 0 | 0 | 0  | 0 | 0 | 0 | 0 | 0 | 0  | 0 | 0 | 0 | 0 | 0 | 0 | 0 | 0 | 0 | 0 |
| M02255_76_000000000-ADUNE_1_2112_13852_20996 C---GG---CT-AA-TTC-----CGT-G-C-----C--A--G---C--AG-C-CGC-GG-----TA-A--T-A-CG-GA-----AG--G---TC-CA-GG-CG-----T-TA-T-C-C-G-----GA-T-TG-G-T-T-----AA---G-C-G-T-----G-T-T--G--TG--A-AA-TG--T-A-GA-T-G----CT-C-AA-----C-A-T-C-T-G-A--C-T---T-G--C-A--G--C-----G--CG-A-A--C-----T--G-G--CT--G-A-C---T-T-G-A-G-T--A--C-AC---AC-A-A-----C-G-T-A--GG-C-----GG--A--ATT---C-A-T-G-GT--GT-A-G-CG-GT--G---A--A-A---TG-C-TT-AG--AT-A-TC--A-T--G-A-A-G-A-AC-T-CC--GA--T--T--GC-GAA-G-G-C-A-----G--C-T-T-A---CGG--G--AG-T-G-----T-T--A-C-T-GA--CG-C-T-T--A-AG--C-T-CG-A--AG-G-T--G-CG--GG-T--AT-C-G-AA-----CA--GG Bacteria(100);Bacteroidetes(100);Bacteroidia(100);Bacteroidales(100);Prevotellaceae(100);unclassified(100);unclassified(100);unclassified(100);unclassified(100); |   |   |   |   |   |   |   |   |   |   |    |   |   |   |   |   |    |   |   |   |   |   |   |   |   |   |   |
| Otu0783                                                                                                                                                                                                                                                                                                                                                                                                                                                                                                                                                                                                                                                                                                                                                                                                          | 0 | 0 | 0 | 0 | 0 | 0 | 0 | 0 | 0 | 0 | 0  | 0 | 0 | 0 | 0 | 0 | 0  | 0 | 0 | 0 | 0 | 6 | 0 | 0 | 0 | 0 | 0 |
|                                                                                                                                                                                                                                                                                                                                                                                                                                                                                                                                                                                                                                                                                                                                                                                                                  | 0 | 0 | 0 | 0 | 0 | 0 | 0 | 0 | 0 | 0 | 0  | 0 | 0 | 0 | 0 | 0 | 0  | 0 | 0 | 0 | 0 | 0 | 0 | 0 | 0 | 0 | 0 |
|                                                                                                                                                                                                                                                                                                                                                                                                                                                                                                                                                                                                                                                                                                                                                                                                                  | 0 | 0 | 0 | 0 | 0 | 0 | 0 | 0 | 0 | 0 | 0  | 0 | 0 | 0 | 0 | 0 | 0  | 0 | 0 | 0 | 0 | 0 | 0 | 0 | 0 | 0 | 0 |
|                                                                                                                                                                                                                                                                                                                                                                                                                                                                                                                                                                                                                                                                                                                                                                                                                  | 0 | 0 | 0 | 0 | 0 | 0 | 0 | 0 | 0 | 0 | 0  | 0 | 0 | 0 | 0 | 0 | 0  | 0 | 0 | 0 | 0 | 0 | 0 | 0 | 0 | 0 | 0 |
| M02255_77_000000000-ADUT3_1_2102_18731_14552 G---AC---GG-AG-GAT-----CCA-A-G-----C--G--T---T--AT-C-CGG-AG-----TG-A--C-T--GG-GC-----GT--A---AA-GA-GTTGC-----G-TA-G-G-C-G-----G--T-TT-G-T-T-----AA---G-T-A-G                                                                                                                                                                                                                                                                                                                                                                                                                                                                                                                                                                                                        |   |   |   |   |   |   |   |   |   |   |    |   |   |   |   |   |    |   |   |   |   |   |   |   |   |   |   |



|                                             |                                                                                                                                                                                                |                                                                                                                                                                                                                                                                                                                                                                                      |                                                                                                                                                                                                      |                                                                                                                                                                              |                                                                                                |   |   |   |   |   |   |   |    |   |   |   |    |    |   |   |   |    |   |   |   |   |
|---------------------------------------------|------------------------------------------------------------------------------------------------------------------------------------------------------------------------------------------------|--------------------------------------------------------------------------------------------------------------------------------------------------------------------------------------------------------------------------------------------------------------------------------------------------------------------------------------------------------------------------------------|------------------------------------------------------------------------------------------------------------------------------------------------------------------------------------------------------|------------------------------------------------------------------------------------------------------------------------------------------------------------------------------|------------------------------------------------------------------------------------------------|---|---|---|---|---|---|---|----|---|---|---|----|----|---|---|---|----|---|---|---|---|
| Otu0785                                     | 0                                                                                                                                                                                              | 0                                                                                                                                                                                                                                                                                                                                                                                    | 0                                                                                                                                                                                                    | 0                                                                                                                                                                            | 0                                                                                              | 0 | 0 | 0 | 0 | 0 | 0 | 0 | 0  | 0 | 0 | 0 | 0  | 0  | 0 | 0 | 0 | 0  | 0 | 0 | 0 | 0 |
|                                             | 0                                                                                                                                                                                              | 0                                                                                                                                                                                                                                                                                                                                                                                    | 0                                                                                                                                                                                                    | 0                                                                                                                                                                            | 0                                                                                              | 0 | 0 | 0 | 0 | 0 | 0 | 0 | 49 | 0 | 0 | 0 | 0  | 0  | 0 | 0 | 0 | 0  | 0 | 0 | 0 | 0 |
|                                             | 0                                                                                                                                                                                              | 0                                                                                                                                                                                                                                                                                                                                                                                    | 0                                                                                                                                                                                                    | 0                                                                                                                                                                            | 0                                                                                              | 0 | 0 | 0 | 4 | 0 | 0 | 0 | 0  | 0 | 0 | 0 | 0  | 0  | 0 | 0 | 0 | 0  | 0 | 0 | 0 | 0 |
|                                             | 0                                                                                                                                                                                              | 0                                                                                                                                                                                                                                                                                                                                                                                    | 0                                                                                                                                                                                                    | 0                                                                                                                                                                            | 0                                                                                              | 0 | 0 | 0 | 0 | 0 | 0 | 0 | 0  | 0 | 0 | 0 | 14 | 0  | 0 | 0 | 0 | 0  | 0 | 0 | 0 | 0 |
| M02255_77_00000000-ADUT3_1_1116_23193_14043 | G---                                                                                                                                                                                           | AC--GG-                                                                                                                                                                                                                                                                                                                                                                              | AG-GAT-----GCA-A-G----                                                                                                                                                                               | C-G-T--T--                                                                                                                                                                   | AT-C-CGG-AA-----TG-A-T-T--GG-GC-----GT--A----AA-GC-GT-CT-----G-TA-G-G-T-G-----G--TT-A-T-T----- |   |   |   |   |   |   |   |    |   |   |   |    |    |   |   |   |    |   |   |   |   |
| ----                                        | AA---G-T-C-T-----G-C-T--G--TT--A-AA-GC--A-C-AG-G-G----                                                                                                                                         | CT-C-AA-----C-C-C-T-G-T-A--T-A---                                                                                                                                                                                                                                                                                                                                                    | G-G--C-G--G--T-----A-GA-A-A--C-----T-G-G--TA--G-G-C---                                                                                                                                               | T-T-G-A-G-T--A--T-GG----                                                                                                                                                     | TA-G-G-----G-G-T-A--GA-G-----GG--A--ATT---C-                                                   |   |   |   |   |   |   |   |    |   |   |   |    |    |   |   |   |    |   |   |   |   |
| C-C-G-AT--GT-A-G-TG-GT--G---                | A-A-A--TG-C-GT-TG--AT-A-TC-G-G--G-A-A-G-A-AC-A-CC--AA--A-G--GC-GAA-A-G-C-A-----C-T-C-T-G--CTG-G--GC-C-A-----A-T--A-C-T--GA--CA-C-T-G--A-GA--G-A-CG-A--AA-G-C--T-AG--GG-G--AG-C-A-AA-----TG--GG | Bacteria(100);Cyanobacteria(100);unclassified(100);unclassified(100);unclassified(100);unclassified(100);unclassified(100);unclassified(100);unclassified(100);                                                                                                                                                                                                                      |                                                                                                                                                                                                      |                                                                                                                                                                              |                                                                                                |   |   |   |   |   |   |   |    |   |   |   |    |    |   |   |   |    |   |   |   |   |
| Otu0786                                     | 0                                                                                                                                                                                              | 0                                                                                                                                                                                                                                                                                                                                                                                    | 0                                                                                                                                                                                                    | 0                                                                                                                                                                            | 0                                                                                              | 0 | 0 | 0 | 0 | 0 | 0 | 0 | 0  | 0 | 0 | 0 | 0  | 0  | 0 | 0 | 0 | 2  | 1 | 0 | 0 | 0 |
|                                             | 0                                                                                                                                                                                              | 0                                                                                                                                                                                                                                                                                                                                                                                    | 0                                                                                                                                                                                                    | 0                                                                                                                                                                            | 0                                                                                              | 0 | 0 | 0 | 0 | 0 | 0 | 0 | 0  | 7 | 0 | 0 | 0  | 0  | 0 | 0 | 0 | 0  | 0 | 0 | 0 | 0 |
|                                             | 0                                                                                                                                                                                              | 0                                                                                                                                                                                                                                                                                                                                                                                    | 0                                                                                                                                                                                                    | 0                                                                                                                                                                            | 0                                                                                              | 3 | 0 | 0 | 0 | 0 | 0 | 0 | 0  | 0 | 0 | 0 | 0  | 0  | 0 | 0 | 0 | 0  | 0 | 0 | 0 | 0 |
|                                             | 7                                                                                                                                                                                              | 0                                                                                                                                                                                                                                                                                                                                                                                    | 0                                                                                                                                                                                                    | 0                                                                                                                                                                            | 0                                                                                              | 0 | 0 | 0 | 0 | 0 | 0 | 0 | 0  | 0 | 0 | 0 | 0  | 0  | 0 | 0 | 0 | 0  | 0 | 0 | 0 | 0 |
| M02255_76_00000000-ADUNE_1_1113_16414_22687 | C---                                                                                                                                                                                           | GG--CT-AA-CTC-----CGT-G-C-----C-A-G--C--AG-C-CGC-GG-----TA-A--T-A-CG-GA-----GG--G----TG-CA-AG-CG-----T-TA-T-C-C-G-----G--A-TT-A-A-T-----CA---G-T-C-A-----G-T-G--G--TG--A-AA-TC--T-C-AT-A-G----CT-T-AA-----C-T-A-T-G-A-A--A-C---T-G--C-C--A--T-----T-GA-T-A--C-----T-G-T--TA--G-T-C---T-T-G-A-G-T--G--A-TG---TT-G-A-----A-G-T-T--GC-T-----GG--A--ATG---T-G-T-A-GT--GT-A-G-CG-GT--G--- | A-A-A--TG-C-TT-AG--AT-A-TT--A-C-G-C-A-G-A-AC-A-CC--AA--T-T--GC-GAA-G--G-C-A-----G-G-T-G-A--CTA-A-AC-A-T-----T-A--A-C-T--GA--CG-C-T-G--A-TG--G-A-CG-A--AA-G-C--G-TG--GG-G--AG-C-G-AA-----CA--GG       | Bacteria(100);Bacteroidetes(100);Flavobacteria(100);Flavobacteriales(100);Flavobacteriaceae(100);Wautersiella(100);unclassified(100);unclassified(100);unclassified(100);    |                                                                                                |   |   |   |   |   |   |   |    |   |   |   |    |    |   |   |   |    |   |   |   |   |
| Otu0787                                     | 0                                                                                                                                                                                              | 0                                                                                                                                                                                                                                                                                                                                                                                    | 0                                                                                                                                                                                                    | 0                                                                                                                                                                            | 0                                                                                              | 0 | 0 | 0 | 0 | 0 | 0 | 0 | 0  | 0 | 0 | 0 | 0  | 0  | 0 | 0 | 0 | 24 | 0 | 0 | 0 | 0 |
|                                             | 0                                                                                                                                                                                              | 0                                                                                                                                                                                                                                                                                                                                                                                    | 0                                                                                                                                                                                                    | 0                                                                                                                                                                            | 0                                                                                              | 0 | 0 | 0 | 0 | 0 | 0 | 0 | 0  | 0 | 0 | 0 | 0  | 0  | 0 | 0 | 0 | 0  | 0 | 0 | 0 | 0 |
|                                             | 0                                                                                                                                                                                              | 0                                                                                                                                                                                                                                                                                                                                                                                    | 0                                                                                                                                                                                                    | 0                                                                                                                                                                            | 0                                                                                              | 0 | 0 | 0 | 0 | 0 | 0 | 0 | 0  | 0 | 0 | 0 | 0  | 0  | 0 | 0 | 0 | 0  | 0 | 0 | 0 | 0 |
|                                             | 0                                                                                                                                                                                              | 0                                                                                                                                                                                                                                                                                                                                                                                    | 0                                                                                                                                                                                                    | 0                                                                                                                                                                            | 0                                                                                              | 0 | 0 | 0 | 0 | 0 | 0 | 0 | 0  | 0 | 0 | 0 | 0  | 0  | 0 | 0 | 0 | 0  | 0 | 0 | 0 | 0 |
| M02255_77_00000000-ADUT3_1_1119_14071_16889 | C---                                                                                                                                                                                           | AC--GT-AG-GGG-----CCA-A-G-----C-G-T--T--GT-C-CGG-AT-----TT-A--T-T--GG-GC-----GT--A----AA-GA-GC-TC-----G-TA-G-G-C-G-----G--T-TC-A-G-T-----CA---G-T-C-G-----G-G-T--G--TG--A-AA-AC--T-C-TG-G-G----CT-C-AA-----C-T-C-G-G-A-G-A-----C-G-CC-A--C-C-----C-GA-T-A--C-----T-G-C--TG-TG-A-C---T-T-G-A-G-T--C--C-GG---TA-G-G-----G-G-A-G--CA-G-----GG--A--ATT---C-C-A-G-GT--GT-A-G-CG-GT--G---  | A-A-A--TG-C-GC-AG--AT-A-TC--T-G--G-A-G-G-A-AC-A-CC--GG--T-G--GC-GAA-G--G-C-G-----C-T-G-C-T--CTG--G--GC-C-G-----G-T--A-C-T--GA--CG-C-T-G--A-GG--A-G-CG-A--AA-G-C--G-TG--GG-G--T--AG-C-A-AA-----CA--GG | Bacteria(100);Actinobacteria(100);Actinobacteria(100);Acidimicrobiae(100);Acidimicrobiales(100);Acidimicrobineae(100);unclassified(100);unclassified(100);unclassified(100); |                                                                                                |   |   |   |   |   |   |   |    |   |   |   |    |    |   |   |   |    |   |   |   |   |
| Otu0788                                     | 0                                                                                                                                                                                              | 0                                                                                                                                                                                                                                                                                                                                                                                    | 0                                                                                                                                                                                                    | 0                                                                                                                                                                            | 0                                                                                              | 0 | 0 | 0 | 0 | 0 | 0 | 0 | 0  | 0 | 0 | 0 | 0  | 0  | 0 | 0 | 0 | 0  | 0 | 0 | 0 | 0 |
|                                             | 0                                                                                                                                                                                              | 0                                                                                                                                                                                                                                                                                                                                                                                    | 0                                                                                                                                                                                                    | 0                                                                                                                                                                            | 0                                                                                              | 0 | 0 | 0 | 0 | 0 | 0 | 0 | 0  | 0 | 0 | 0 | 0  | 71 | 0 | 0 | 0 | 0  | 0 | 0 | 0 | 0 |
|                                             | 0                                                                                                                                                                                              | 0                                                                                                                                                                                                                                                                                                                                                                                    | 0                                                                                                                                                                                                    | 0                                                                                                                                                                            | 0                                                                                              | 0 | 0 | 0 | 0 | 0 | 0 | 0 | 0  | 0 | 0 | 0 | 0  | 0  | 0 | 0 | 0 | 0  | 0 | 0 | 0 | 0 |
|                                             | 0                                                                                                                                                                                              | 0                                                                                                                                                                                                                                                                                                                                                                                    | 0                                                                                                                                                                                                    | 0                                                                                                                                                                            | 0                                                                                              | 0 | 0 | 0 | 0 | 0 | 0 | 0 | 0  | 0 | 0 | 0 | 0  | 0  | 0 | 0 | 0 | 0  | 0 | 0 | 0 | 0 |
| M02255_77_00000000-ADUT3_1_1107_5376_11481  | T---                                                                                                                                                                                           | AC--GT-AG-GGG-----GCA-A-G-----C-G-T--T--GT-T-CGG-AA-----TT-A--C-T--GG-GC-----GT--A----AA-GG-GT-GC-----G-TA-G-G-C-G-----G--T-TT-A-T-C-----AA---G-T-C-A-----G-G-G--G--TG--                                                                                                                                                                                                             |                                                                                                                                                                                                      |                                                                                                                                                                              |                                                                                                |   |   |   |   |   |   |   |    |   |   |   |    |    |   |   |   |    |   |   |   |   |



[illegible]



Otu0795 0 0 0 0 0 0 0 0 0 0 0 0 0 0 0 0 0 0 0 0 0 0 0 0 0 0 0 0  
0 0 0 0 0 0 0 0 0 0 0 0 0 0 0 66 0 0 0 0 0 0 0 0 1 0 0 0 0  
0 0 0 0 0 0 0 0 0 0 0 0 0 0 0 0 0 0 0 0 0 0 0 0 0 0 0 0 0  
0 0 0 0 0 0 0 0 0 0 0 0 0 0 0 0 0 0 0 0 0 0 0 0 0 0 0 0 0  
M02255\_77\_000000000-ADUT3\_1\_1102\_15282\_3459 T---AC---GT-AG-GGA-----GCA-A-G-----C--G--T---T--GT-C-CGG-AT-----TT-A--T-T--GG-GC-----GT--A----AA-GG-GT-GC-----G-TA-G-G-C-G-----G--C-CT-G-A-T-----AA-  
---G-T-C-A-----G-A-T--G--TG--A-AA-GG--C-G-GA-G-G-----CT-C-AA-----C-C-T-C-C-G-T--T-----A-G--C-A--T--C-----T--GA-A-A--C-----T--G-T--CA--G-G-C---T-T-G-A-G-T--G---A-AG---GA-G-A-----G-G-A-A---AG-T-----GG--A--ATT---C-C-T-A-  
GT--GT-A-G-CG-GT--G---A--A-A---TG-C-GT-AG--AT-A-TT--A-G--G-A-G-G-A-AT-A-CC---GG--T--G--GC-GAA-G--G-C-G-----A--C-T-T-T---CTG--G--AC-T-T-----A-A--A-C-T--GA--CG-C-T-G--A-GG--C-A-CG-A-AA-G-T---G-TG--GG-G--AG-C-  
A-AA-----CA--GG Bacteria(100);Firmicutes(100);Clostridia(100);Clostridiales(100);Family\_XI\_Incertae\_Sedis(100);Finegoldia(100);unclassified(100);unclassified(100);unclassified(100);

Otu0796 0 0 0 0 0 0 0 0 0 0 0 0 0 0 0 0 0 0 0 0 0 0 0 0 0 0 0 0  
0 0 0 0 0 0 0 0 0 0 0 0 0 0 0 87 0 0 0 0 0 0 0 0 0 0 0 0 0  
0 0 0 0 0 0 0 0 0 0 0 0 0 0 0 0 0 0 0 0 0 0 0 0 0 0 0 0 0  
0 0 0 0 0 0 0 0 0 0 0 0 0 0 0 0 0 0 0 0 0 0 0 0 0 0 0 0 0  
M02255\_77\_000000000-ADUT3\_1\_1101\_17178\_12006 T---AC---GA-AG-GGG-----GCT-A-G-----C--G--T---T--GC-T-CGG-AA-----TG-A--C-T--GG-GC-----GT--A----AA-GG-GC-GT-----G-TA-G-G-C-G-----G--T-TT-G-C-A----  
-----CA---G-T-T-A-----G-A-T--G--TG--A-AA-TC--C-C-CG-G-G-----CT-T-AA-----C-C-T-G-G-G-A--G-C---T-G--C-A--T--T-----T--AA-T-A--C-----G--T-G--CA--G-A-C---T-A-G-A-G-T--G---T-GA---GA-G-A-----G-G-G-T---TG-T-----GG--A--ATT---  
C-C-C-A-GT--GT-A-G-AG-GT--G---A--A-A---TT-C-GT-AG--AT-A-TT--G-G--G-A-A-G-A-AC-A-CC---GG--T--G--GC-GAA-G--G-C-G-----G--C-A-A-C---CTG--G--CT-C-A-----T-G--A-C-T--GA--CG-C-T-G--A-GG--C-G-CG-A-AA-G-C---G-TG--  
GG-G--AG-C-A-AA-----CA--GG Bacteria(100);Proteobacteria(100);Alphaproteobacteria(100);Rhodospirillales(100);Acetobacteraceae(100);Acetobacter(100);unclassified(100);unclassified(100);unclassified(100);

Otu0797 0 0 0 0 0 0 0 0 0 0 0 0 0 0 0 0 0 2 0 0 0 0 0 0 0 0 0 0  
0 0 0 0 0 0 0 0 0 0 0 0 0 0 0 0 0 0 0 0 0 0 0 0 0 0 0 0  
0 0 0 0 0 0 0 0 0 0 0 0 0 0 0 0 0 0 0 0 0 0 0 0 0 0 0 0  
0 0 0 0 0 0 0 0 0 0 0 0 0 0 0 0 0 0 0 0 0 0 0 0 0 0 0 0  
M02255\_77\_000000000-ADUT3\_1\_1113\_2732\_15178 T---AC---GT-AT-GTT-----GCG-A-G-----C--G--T---T--AT-C-CGG-AA-----TT-A--T-T--GG-GC-----TT--A----AA-GG-GC-AT-----C-TA-G-G-C-G-----G--T-AA-G-A-C-----AA--  
--G-T-T-G-----A-A-G--G--TG--A-AA-AC--C-T-GT-G-G-----CT-C-AA-----C-C-A-T-A-G-G--C-T---T-G--C-C---T-A-----C-AA-A-A--C-----T--G-T--TG--A-A-C---T-A-G-A-G-T-A--C-TG---GA-A-A-----G-G-T-G---GG-T-----GG--A--ACT---A-C-A-C-  
GA--GT-A-G-AG-GT--G---A--A-A---TT-C-GT-AG--AT-A-TG--T-G--T-A-G-G-A-AT-G-CC---GA--T--G--AT-GAA-G--A-T-A-----A--C-T-C-A---CTG--G--AC-A-G-----A-A--A-C-T--GA--CG-C-T-G--A-AG--T-G-CG-A-AA-G-C---T-AG--GG-G--AG-C-  
A-AA-----CA--GG Bacteria(100);Fusobacteria(100);Fusobacteria(100);Fusobacteriales(100);Leptotrichiaceae(100);Sneathia(100);unclassified(100);unclassified(100);unclassified(100);

Otu0798 0 0 0 0 0 0 0 0 0 0 0 0 0 0 0 0 0 3 0 0 0 0 0 0 0 0 0 0  
0 0 0 0 0 0 0 0 0 0 0 0 0 0 0 0 0 0 0 0 0 0 0 0 0 0 0 0  
0 0 0 0 0 0 0 0 0 0 0 0 0 0 0 0 0 0 0 0 0 0 0 0 0 0 0 0  
0 0 0 0 0 0 0 0 0 0 0 0 0 0 0 0 0 0 0 0 0 0 0 0 0 0 0 0  
M02255\_77\_000000000-ADUT3\_1\_2117\_23107\_8474 T---AC---GT-AG-GCA-----GCA-A-G-----C--G--T---T--GT-T-CGG-AA-----TT-A--C-T--GG-GC-----GT--A----AC-GA-GT-GT-----G-TA-G-G-C-G-----G--T-GA-A-C-T-----AA-  
---G-T-T-C-----G-G-T--G--TG--A-AA-TC--T-C-CC-G-G-----CT-C-AA-----C-T-G-G-G-A-G--G-G---T-G--C-G---C--C-----G--GA-A-A--C-----T--G-G--TT--T-G-C---T-G-G-A-G-C--G---T-GG---GA-G-A-----G-G-A-A---AG-C-----GG--A--ATT---C-C-T-G-  
GT--GT-A-G-CG-GT--G---A--A-A---TG-C-GT-AG--AT-A-TC--A-G--G-A-G-G-A-AC-A-CC---TG--T--G--GT-GTA-G--A-C--A-----G--C-T-T-T---CTG--G--AC-C-A-----T-A--G-C-T--GA--CG-C-T-G--A-GA--C-A-CG-A-AA-G-C---G-TG--GG-T--AG-C-  
A-AA-----CA--GG Bacteria(100);unclassified(100);unclassified(100);unclassified(100);unclassified(100);unclassified(100);unclassified(100);unclassified(100);unclassified(100);

Otu0799 0 0 0 0 0 0 0 0 0 0 0 0 0 0 0 0 0 1 0 0 0 0 0 0 0 0 0 0  
0 0 0 0 0 0 0 0 0 0 0 0 0 0 0 0 0 0 0 0 0 0 0 0 0 0 0 0  
0 0 0 1 0 0 0 0 0 0 0 0 0 0 0 0 0 0 0 0 0 0 0 0 0 0 0 0  
0 0 0 0 0 0 0 0 0 0 0 0 0 0 0 0 0 0 0 0 0 0 0 0 0 0 0 0  
M02255\_76\_000000000-ADUNE\_1\_1113\_4513\_20301 G---AC---AG-AA-TAA-----GCA-C-C-----G--G--C---T--AA---C-T-CT-----GT-G--C-C--AG-CA-----GC--C----GC-GG-TA-AT-----A-CA-G-A-T-G-----G--T-TT-G-T-C-----AA---  
GCG-T-T-----A-A-T--C--GG--A-AA-TC--C-C-CG-G-G-----CT-C-AA-----C-C-T-G-G-G-A--A-C---T-G--C-A--T--C-----C-AA-A-A--C-----T--G-G--CA--A-G-C---T-A-G-A-G-T-A--T-GG---TA-G-A-----G-G-G-T---AG-T-----GG--A--ATT---T-C-C-T-GT-  
-GT-A-G-CG-GT--G---A--A-A---TG-C-GT-AG--AT-A-TA--G-G--A-A-G-G-A-AC-A-CC---AG--T--G--GC-GAA-G--G-C-G-----A--C-T-A-C---CTG--G--AC-T-G-----A-T--A-C-T--GA--CA-C-T-G--A-GG--T-G-CG-A-AA-G-C---G-TG--GG-G--AG-C-A-  
AA-----CA--GG Bacteria(100);Proteobacteria(100);Gammaproteobacteria(100);unclassified(100);unclassified(100);unclassified(100);unclassified(100);unclassified(100);unclassified(100);



|                                                                                                                                                                                                                         |   |   |   |    |    |   |   |   |   |   |   |   |   |    |   |   |   |   |    |   |   |   |   |   |   |   |   |
|-------------------------------------------------------------------------------------------------------------------------------------------------------------------------------------------------------------------------|---|---|---|----|----|---|---|---|---|---|---|---|---|----|---|---|---|---|----|---|---|---|---|---|---|---|---|
| Otu0800                                                                                                                                                                                                                 | 0 | 0 | 0 | 0  | 0  | 0 | 0 | 0 | 0 | 0 | 0 | 0 | 0 | 0  | 0 | 0 | 0 | 0 | 38 | 0 | 0 | 0 | 0 | 0 | 0 | 0 | 0 |
|                                                                                                                                                                                                                         | 0 | 0 | 0 | 0  | 0  | 0 | 0 | 0 | 0 | 0 | 0 | 0 | 0 | 0  | 0 | 0 | 0 | 0 | 0  | 0 | 0 | 0 | 0 | 0 | 0 | 0 |   |
|                                                                                                                                                                                                                         | 0 | 0 | 0 | 0  | 0  | 0 | 0 | 0 | 0 | 0 | 0 | 0 | 0 | 0  | 0 | 0 | 0 | 0 | 0  | 0 | 0 | 0 | 0 | 0 | 0 | 0 |   |
|                                                                                                                                                                                                                         | 0 | 0 | 0 | 0  | 0  | 0 | 0 | 0 | 0 | 0 | 0 | 0 | 0 | 0  | 0 | 0 | 0 | 0 | 0  | 0 | 0 | 0 | 0 | 0 | 0 | 0 |   |
| M02255_76_000000000-ADUNE_1_2119_19617_13887 C---GG---CT-AA-CTC-----CGT-G-C-----C-A-A-G---C-AG-C-CGC-GG-----TA-A--T-A-CG-GA-----GG-G---TG-CA-AG-CG-----T-TA-T-C-C-G-----G-A-CT-G-A-T-----                               |   |   |   |    |    |   |   |   |   |   |   |   |   |    |   |   |   |   |    |   |   |   |   |   |   |   |   |
| -----CA---G-T-C-A-----G-T-G--G--TG--A-AA-TC--C-T-AT-C-G----CT-T-AA-----C-G-A-T-A-G-A--A-C---T-G--C-C---A-T-----T-GA-T-A--C-----T-G-T--TA--G-T-C---T-T-G-A-A-T--T--A-GT----TT-G-A-----A-G-T-G--GC-T-----GG-A--ATG---T-G- |   |   |   |    |    |   |   |   |   |   |   |   |   |    |   |   |   |   |    |   |   |   |   |   |   |   |   |
| T-A-GT--GT-A-G-CG-GT--G---A--A-A---TG-C-TT-AG--AT-A-TT--A-C--G-C-A-G-A-AC-A-CC---AA--T-T--GC-GAA-G--G-C--A-----G-G-T-C-A---CTA-A-A-GT-C-T-----A-T---A-T-T-GA--CG-C-T-G--A-TG--G-A-CG-A--AA-G-C---G-TG--GG-G--           |   |   |   |    |    |   |   |   |   |   |   |   |   |    |   |   |   |   |    |   |   |   |   |   |   |   |   |
| AG-C-G-AA-----CA--GG Bacteria(100);Bacteroidetes(100);Flavobacteria(100);Flavobacteriales(100);Flavobacteriaceae(100);unclassified(100);unclassified(100);unclassified(100);unclassified(100);                          |   |   |   |    |    |   |   |   |   |   |   |   |   |    |   |   |   |   |    |   |   |   |   |   |   |   |   |
| Otu0801                                                                                                                                                                                                                 | 0 | 0 | 0 | 0  | 0  | 0 | 0 | 0 | 0 | 0 | 0 | 0 | 0 | 0  | 0 | 0 | 0 | 0 | 1  | 0 | 0 | 0 | 0 | 0 | 0 | 0 | 0 |
|                                                                                                                                                                                                                         | 0 | 0 | 0 | 0  | 0  | 0 | 0 | 0 | 0 | 0 | 0 | 0 | 0 | 0  | 0 | 0 | 0 | 0 | 0  | 0 | 0 | 0 | 0 | 0 | 0 | 0 |   |
|                                                                                                                                                                                                                         | 0 | 0 | 0 | 0  | 0  | 0 | 0 | 0 | 0 | 0 | 0 | 0 | 0 | 0  | 0 | 0 | 0 | 0 | 0  | 0 | 0 | 0 | 0 | 0 | 0 | 0 |   |
|                                                                                                                                                                                                                         | 0 | 0 | 0 | 23 | 0  | 0 | 0 | 0 | 0 | 0 | 0 | 0 | 0 | 0  | 0 | 0 | 0 | 0 | 0  | 0 | 0 | 0 | 0 | 0 | 0 | 0 |   |
| M02255_77_000000000-ADUT3_1_1110_10330_20197 T---AC---GT-AT-GGT-----GCA-A-G-----C-G--T---T--AT-C-CGG-AT-----TT-A--C-T--GG-GT-----GT--A---AA-GG-GA-GC-----G-TA-G-A-C-G-----G--A-CT-T-G-C-----                            |   |   |   |    |    |   |   |   |   |   |   |   |   |    |   |   |   |   |    |   |   |   |   |   |   |   |   |
| -----AA---G-T-C-T-----G-A-A--G--TG--A-AA-GC--C-C-GG-G-G----CT-C-AA-----C-C-C-C-G-G-G--A-C---T-G--C-T---T-T-----G--GA-A-A--C-----T--G-T--AG--G-T-C---T-A-G-A-G-T--G--C-TG---GA-G-A-----G-G-T-A--AG-T-----GG--A--ATT---C- |   |   |   |    |    |   |   |   |   |   |   |   |   |    |   |   |   |   |    |   |   |   |   |   |   |   |   |
| C-T-A-GT--GT-A-G-CG-GT--G---A--A-A---TG-C-GT-AG--AT-A-TT--A-G--G-A-G-G-A-AC-A-CC---AG--T-G--GC-GAA-G--G-C--G-----G--C-T-T-A---CTG-G--AC-A-G-----T-A--A-C-T-GA--CG-T-T-G--A-GG--C-T-CG-A--AA-G-C---G-TG--GG-G--          |   |   |   |    |    |   |   |   |   |   |   |   |   |    |   |   |   |   |    |   |   |   |   |   |   |   |   |
| -AG-C-A-AA-----CA--GG Bacteria(100);Firmicutes(100);Clostridia(100);Clostridiales(100);Lachnospiraceae(100);unclassified(100);unclassified(100);unclassified(100);unclassified(100);                                    |   |   |   |    |    |   |   |   |   |   |   |   |   |    |   |   |   |   |    |   |   |   |   |   |   |   |   |
| Otu0802                                                                                                                                                                                                                 | 0 | 0 | 0 | 0  | 0  | 0 | 0 | 0 | 0 | 0 | 0 | 0 | 0 | 0  | 0 | 0 | 0 | 0 | 1  | 0 | 0 | 0 | 0 | 0 | 0 | 0 | 0 |
|                                                                                                                                                                                                                         | 0 | 0 | 0 | 0  | 0  | 0 | 0 | 0 | 0 | 0 | 0 | 0 | 0 | 0  | 0 | 0 | 0 | 0 | 0  | 0 | 0 | 0 | 0 | 0 | 0 | 0 |   |
|                                                                                                                                                                                                                         | 0 | 0 | 0 | 0  | 0  | 0 | 0 | 0 | 0 | 0 | 0 | 0 | 0 | 15 | 0 | 0 | 0 | 0 | 0  | 0 | 0 | 0 | 0 | 0 | 0 | 0 |   |
|                                                                                                                                                                                                                         | 0 | 0 | 0 | 0  | 44 | 0 | 0 | 0 | 0 | 0 | 0 | 0 | 0 | 0  | 0 | 0 | 0 | 0 | 0  | 0 | 0 | 0 | 0 | 0 | 0 | 0 |   |
| M02255_77_000000000-ADUT3_1_2109_11343_9850 T---AC---GT-AG-GGG-----ACG-A-G-----C-G--T---T--GT-C-CGG-AA-----TC-A--C-T--GG-GC-----GT--A---AA-GG-GC-GC-----G-TA-G-G-C-G-----G--T-TT-T-A-T-----AA-                          |   |   |   |    |    |   |   |   |   |   |   |   |   |    |   |   |   |   |    |   |   |   |   |   |   |   |   |
| ---G-T-C-A-----G-A-T--G--TG--A-AA-GG--T-A-CC-G-G----CT-C-AA-----C-C-G-G-T-G-A--C-G---T-G--C-A--T-T-----T--GA-A-A--C-----T--G-T--AA--G-A-C---T-T-G-A-G-T--A--C-TG---AA-G-A-----G-G-C-A--AG-C-----GG--A--ATT---C-C-T-A-   |   |   |   |    |    |   |   |   |   |   |   |   |   |    |   |   |   |   |    |   |   |   |   |   |   |   |   |
| GT--GT-A-G-CG-GT--G---A--A-A---TG-C-GT-AG--AT-A-TT--A-G--G-A-A-G-A-AC-A-CC---GG--T-G--GC-GAA-G--G-C--G-----G--C-T-T-G---CTG-G--GC-A-G-----A-T---A-C-T-GA--CG-C-T-G--A-GG--T-G-CG-A--AA-G-C---G-TG--GG-G--AG-            |   |   |   |    |    |   |   |   |   |   |   |   |   |    |   |   |   |   |    |   |   |   |   |   |   |   |   |
| C-G-AA-----CA--GG Bacteria(100);Firmicutes(100);Clostridia(100);Clostridiales(100);Eubacteriaceae(100);Eubacterium(100);unclassified(100);unclassified(100);unclassified(100);unclassified(100);                        |   |   |   |    |    |   |   |   |   |   |   |   |   |    |   |   |   |   |    |   |   |   |   |   |   |   |   |
| Otu0803                                                                                                                                                                                                                 | 0 | 0 | 0 | 0  | 0  | 0 | 0 | 0 | 0 | 0 | 0 | 0 | 0 | 0  | 0 | 0 | 0 | 0 | 0  | 0 | 0 | 0 | 0 | 0 | 0 | 0 | 0 |
|                                                                                                                                                                                                                         | 0 | 0 | 0 | 0  | 0  | 0 | 0 | 0 | 0 | 0 | 0 | 0 | 0 | 23 | 0 | 0 | 0 | 0 | 0  | 0 | 0 | 0 | 0 | 0 | 2 | 0 | 0 |
|                                                                                                                                                                                                                         | 0 | 0 | 0 | 0  | 0  | 0 | 0 | 0 | 0 | 0 | 0 | 0 | 0 | 0  | 0 | 0 | 0 | 0 | 0  | 0 | 0 | 0 | 0 | 0 | 0 | 0 |   |
|                                                                                                                                                                                                                         | 0 | 0 | 0 | 0  | 0  | 0 | 0 | 0 | 0 | 0 | 0 | 0 | 0 | 0  | 0 | 0 | 0 | 0 | 0  | 0 | 0 | 0 | 0 | 0 | 0 | 0 |   |
| M02255_77_000000000-ADUT3_1_2119_22764_18095 G---AC---AG-GA-GAT-----GCA-A-G-----T--G--T---T--AT-C-CGG-AA-----TG-A--T-T--GG-GC-----GT--A---AA-GG-GT-CT-----G-TA-G-G-T-G-----G--T-TT-G-A-A-----                           |   |   |   |    |    |   |   |   |   |   |   |   |   |    |   |   |   |   |    |   |   |   |   |   |   |   |   |
| -----AA---G-T-C-T-----G-T-T--G--TT--A-AA-TA--C-T-AG-G-G----CT-T-AA-----C-C-C-T-G-G-T--C-A--G-G--C-A--A-T-----A-GA-A-A--C-----T--A-T--TA--G-A-C---T-A-G-A-G-T--A--C-GG---TA-G-A-----G-G-C-A--GA-G-----GG--A--ATT---T-    |   |   |   |    |    |   |   |   |   |   |   |   |   |    |   |   |   |   |    |   |   |   |   |   |   |   |   |
| T-C-G-GT--GG-A-G-TG-GT--G---A--A-A---TG-C-GT-AG--AT-C-TC--G-A--A-A-A-G-A-AC-A-CC---AA--T-G--GC-GAA-G--G-C--A-----C--T-C-T-G---CTG-G--GC-C-G-----A-T---A-C-T-GA--CA-T-T-G--A-GA--G-A-CG-A--AA-G-C---T-AG--GG-G--         |   |   |   |    |    |   |   |   |   |   |   |   |   |    |   |   |   |   |    |   |   |   |   |   |   |   |   |
| -AG-C-A-AA-----AG--GG Bacteria(100);Cyanobacteria(100);unclassified(100);unclassified(100);unclassified(100);unclassified(100);unclassified(100);unclassified(100);unclassified(100);                                   |   |   |   |    |    |   |   |   |   |   |   |   |   |    |   |   |   |   |    |   |   |   |   |   |   |   |   |
| Otu0804                                                                                                                                                                                                                 | 0 | 0 | 0 | 0  | 0  | 0 | 0 | 0 | 0 | 0 | 0 | 0 | 0 | 0  | 0 | 0 | 0 | 0 | 0  | 0 | 0 | 0 | 0 | 0 | 0 | 0 | 0 |
|                                                                                                                                                                                                                         | 0 | 0 | 0 | 0  | 0  | 0 | 0 | 0 | 0 | 0 | 0 | 0 | 0 | 33 | 0 | 0 | 0 | 0 | 0  | 0 | 0 | 0 | 0 | 0 | 0 | 0 |   |
|                                                                                                                                                                                                                         | 0 | 0 | 0 | 0  | 0  | 0 | 0 | 0 | 0 | 0 | 0 | 0 | 0 | 0  | 0 | 0 | 0 | 0 | 0  | 0 | 0 | 0 | 0 | 0 | 0 | 0 |   |
|                                                                                                                                                                                                                         | 0 | 0 | 0 | 0  | 0  | 0 | 0 | 0 | 0 | 0 | 0 | 0 | 0 | 0  | 0 | 0 | 0 | 0 | 0  | 0 | 0 | 0 | 0 | 0 | 0 | 0 |   |
| M02255_77_000000000-ADUT3_1_2113_9565_19962 G---AC---GG-AG-GGG-----GCT-A-G-----C--G--T---T--GT-T-CGG-AA-----TT-A--C-T--GG-GC-----GT--A---AA-GA-GT-GC-----G-TA-G-G-T-G-----G--T-TT-A-G-T-----                            |   |   |   |    |    |   |   |   |   |   |   |   |   |    |   |   |   |   |    |   |   |   |   |   |   |   |   |
| AA---G-T-T-G-----G-A-A--G--TG--A-AA-GC--C-C-GG-G-G----CT-T-AA-----C-C-T-C-G-G-A--A-T---T-G--C-T---T-T-----C--AA-A-A--C-----T--A-C--TA--A-T-C---T-A-G-A-G-T--G---T-AG---TA-G-G-----G-G-A-T--GA-T-----GG--A--ATT---C-C-T- |   |   |   |    |    |   |   |   |   |   |   |   |   |    |   |   |   |   |    |   |   |   |   |   |   |   |   |
| A-GT--GT-A-G-AG-GT--G---A--A-A---TT-C-TT-AG--AT-A-TT--A-G--G-A-G-G-A-AC-A-CC---GG--T-G--GC-GAA-G--G-C--G-----G--T-C-A-T---CTG-G--GC-T-A-----C-A--A-C-T-GA--CG-C-T-G--A-TG--C-A-CG-A--AA-G-C---G-TG--GG-G--AG-           |   |   |   |    |    |   |   |   |   |   |   |   |   |    |   |   |   |   |    |   |   |   |   |   |   |   |   |
| C-A-AA-----CA--GG Bacteria(100);Proteobacteria(100);Alphaproteobacteria(100);Rickettsiales(100);Rickettsiaceae(100);Rickettsia(100);unclassified(100);unclassified(100);unclassified(100);unclassified(100);            |   |   |   |    |    |   |   |   |   |   |   |   |   |    |   |   |   |   |    |   |   |   |   |   |   |   |   |



Otu0805      0      0      0      0      0      0      0      0      0      0      0      0      0      0      0      0      0      0      5      0      0      0      0      0      0      0      0  
0      0      0      0      0      0      0      0      0      0      0      0      0      0      0      0      0      0      0      0      0      0      0      0      0      0      0  
0      0      0      0      0      0      0      0      0      0      0      0      0      0      0      0      0      0      0      0      0      0      0      0      0      0      0  
0      0      0      0      0      0      0      0      0      0      0      0      0      0      0      0      0      0      0      0      0      0      0      0      0      0      0  
M02255\_77\_000000000-ADUT3\_1\_2112\_17525\_9790 T---AC---GT-AG-GGG-----GCA-A-G-----C--G--T---T-AT-C-CGG-AA-----TC-A--T-T--GG-GC-----GT--A----AA-GC-GT-GC-----G-TA-G-G-C-G-----G--T-TT-G-A-A-----  
GG---G-T-C-A-----G-A-G--G--TG--A-AA-GG--T-C-GG-G-G----CT-T-AA-----C-C-C-C-G-G-T-T-----A-G--C-C--T--T-----T-GA-A-A--C-----C--G-G-CA-G-A-C---T-T-G-A-G-T--A---C-AG----GA-G-G-----G-G-A-A--AG-T-----GG--A--ATT---T-C-T-  
A-GT--GT-A-G-CG-GT--G---G--A-A---TG-C-GT-AG--AT-A-TT--A-G--A-A-G-G-A-AC-A-CC--AG--T--G--GC-GAA-G--G-C--G-----A--C-T-T-T---CTG--G--AC-T-G-----T-A---A-C-T--GA--CG-C-T-G--A-GG--C-A-CG-A--AA-G-C---G-TG--GG-T--AG-  
C-G-AA-----CA--GG      Bacteria(100);Firmicutes(100);Clostridia(100);Clostridiales(100);unclassified(100);unclassified(100);unclassified(100);unclassified(100);unclassified(100);

Otu0806      0      0      0      0      0      0      0      0      0      0      0      0      0      0      0      0      0      0      0      0      0      0      0      0      0      0      0  
0      0      0      0      0      0      0      0      0      0      0      0      0      55      0      0      0      0      0      0      0      0      0      0      0      0      0      0  
0      0      0      0      0      0      0      0      0      0      0      0      0      0      0      0      0      0      0      0      0      0      0      0      0      0      0  
0      0      0      0      0      0      0      0      0      0      0      0      0      0      0      0      0      0      0      0      0      0      0      0      0      0      0  
M02255\_77\_000000000-ADUT3\_1\_1117\_4791\_12506 T---AC---GT-AG-GTG-----GCG-A-G-----C--G--T---T-GT-C-CGG-AT-----TT-A--C-T--GG-GT-----GT--A----AA-GG-GC-GT-----G-TA-G-G-C-G-----G--G-CA-G-T-C-----  
AA---G-T-C-A-----G-A-T--G--TG--A-AA-TA--C-C-GG-G-G----CT-T-AA-----C-C-C-C-G-G-A--G-C---T-G--C-A--T--T-----T-GA-A-A--C-----T--G-A-CA--G-T-C---T-T-G-A-G-T--G---C-CG----GA-G-A-----G-G-A-A--AG-C-----GG--A--ATT---C-C-T-  
A-GT--GT-A-G-CG-GT--G---A--A---TG-C-GT-AG--AT-A-TT--A-G--G-A-G-G-A-AC-A-CC--AG--T--G--GC-GAA-G--G-C--G-----G--C-T-T-T---CTG--G--AC-G-G-----T-A---A-C-T--GA--CG-C-T-G--A-GG--C-G-CG-A--AA-G-C---A-TG--GG-G--  
AG-C-A-AA-----CA--GG      Bacteria(100);Firmicutes(100);Clostridia(100);Clostridiales(100);Ruminococcaceae(100);unclassified(100);unclassified(100);unclassified(100);unclassified(100);

Otu0807      0      0      0      0      0      0      0      0      0      0      0      0      0      0      0      0      1      0      0      0      0      0      0      0      0      0      0  
0      0      1      0      0      0      0      0      0      0      0      0      0      0      0      0      0      0      0      5      0      0      0      0      0      0      0      0  
0      5      0      0      0      0      0      0      1      0      0      0      0      0      0      0      0      0      0      0      0      0      0      0      0      0      0  
0      0      0      0      0      0      0      0      0      2      0      10      0      0      0      0      0      0      0      0      0      0      0      0      0      0      0  
M02255\_76\_000000000-ADUNE\_1\_1115\_7306\_18567 .....AC---T-AC-GTG-----CC-A-G-----C--A--G---C--CG-C-GGT-AA-----TA-C--G-T--AG-GT-----GA--C----AA-GC-G--TT-----G-TC-C-G---G-----T-CT-G-T-T-----TA---G-  
T-C-T-----A-A-T--G--TG--A-AA-GC--C-C-AC-G-G----CT-T-AA-----C-C-G-T-G-G-A--A-----C-GG-C-A--T--T-----G--GA-A-A--C-----T--G-A-CA--G-A-C---T-T-G-A-A-T--G---T-AG----AA-G-A-----G-G-A-A--AA-T-----GG--A--ATT---C-C-A-A-GT--  
GT-A-G-CG-GT--G---G--A-A---TG-C-GT-AG--AT-A-TT--T-G--G-A-G-G-A-AC-A-CC--AG--T--G--GC-GAA-G--G-C--G-----A--T-T-T-T---CTG--G--TC-T-A-----A-C---A-T-T--GA--CG-C-T-G--A-GG--C-T-CG-A--AA-G-C---G-TG--GG-G--AG-C-G-  
AA-----CA--GG      Bacteria(100);Firmicutes(100);Bacilli(100);Lactobacillales(100);Carnobacteriaceae(100);Dolosigranulum(100);unclassified(100);unclassified(100);unclassified(100);

Otu0808      0      0      0      0      0      0      0      0      0      0      0      0      0      0      0      0      0      0      2      3      0      0      0      0      0      0      0  
0      0      0      0      0      0      0      0      0      0      0      0      0      0      0      0      0      0      0      0      0      0      0      0      0      0      0  
0      0      0      0      0      0      0      0      0      0      0      0      0      0      0      0      0      0      0      0      0      0      0      0      0      0      0  
0      0      0      0      0      0      0      1      0      0      0      0      0      0      0      0      0      0      0      0      0      0      0      0      0      0      0  
M02255\_76\_000000000-ADUNE\_1\_2107\_15756\_15592      C---TA---AC-TC-TGT-----GC--CAGC-----A--G--C---C--GC-G-GTA-AT-----AC-A--G-A--GG-GT-----G---C----AA-GC-GT-----TA-A-T-C-G-----G--T-CT-T-T-T-----  
-AA---G-T-C-G-----G-A-T--G--TG--A-AA-TC--C-C-TG-A-G----CT-T-AA-----C-T-T-A-G-G-A--A-T---T-G--C-A--T--A-----C-GA-T-A--C-----T--G-G-GA--G-A-C---T-A-G-A-G-T--A---T-GG----GA-G-A-----G-G-A-T---GG-T-----AG--A--ATT---C-C-  
A-G-GT--GT-A-G-CG-GT--G---A--A---TT-C-GT-AG--AG-A-TC--T-G--G-A-G-G-A-AT-A-CC--GA--T--G--GC-GAA-G--G-C--A-----G--C-C-A-T---CTG--G--CC-T-A-----A-T---A-C-T--GA--CA-C-T-G--A-GG--T-A-CG-A--AA-G-C---A-TG--GG-G--  
AG-C-A-AA-----CA--GG      Bacteria(100);Proteobacteria(100);Gammaproteobacteria(100);Pseudomonadales(100);Moraxellaceae(100);Acinetobacter(100);unclassified(100);unclassified(100);unclassified(100);

Otu0809      0      0      0      0      0      0      0      0      0      0      0      0      0      0      0      0      0      0      0      0      0      0      0      0      0      0      0  
0      0      0      0      0      0      0      0      0      0      0      0      0      62      0      0      0      0      0      0      0      0      0      0      0      0      0      0  
0      0      0      0      0      0      0      0      0      0      0      0      0      0      0      0      0      0      0      0      0      0      0      0      0      0      0  
0      0      0      0      0      0      0      0      0      0      0      0      0      0      0      0      0      0      0      0      0      0      0      0      0      0      0  
M02255\_77\_000000000-ADUT3\_1\_1112\_9911\_5900      T---AC---GA-AG-GGG-----GCG-A-G-----C--G--T---T-GT-T-CGG-AT-----TT-A--C-T--GG-GC-----GT--A----AA-GG-GC-GC-----G-TA-G-G-C-G-----G--C-CC-T-C-T-----TT-  
---G-T-C-G-----C-G-T--G--TG--A-AA-GC--C-C-CG-G-G----CT-C-AA-----C-C-T-G-G-G-A--A-T---T-G--C-G---C--G-----C-GA-A-A--C-----G--G-G-GG--G-G-C---T-T-G-A-G-T--T---C-GG----GA-G-A-----G-G-A-G---CG-T-----GG--A--ATT---C-C-C-A-  
GT--GT-A-G-AG-GT--G---A--A---TT-C-GT-AG--AT-A-TT--G-G--G-A-A-G-A-AC-A-CC--GG--T--G--GC-GAA-G--G-C--G-----G--C-G-C-T---CTG--G--AC-C-G-----A-G---A-C-T--GA--CG-C-T-G--A-GG--C-G-CG-A--AA-G-C---G-TG--GG-G--AG-  
C-A-AA-----CA--GG      Bacteria(100);Proteobacteria(100);Alphaproteobacteria(100);Rhodospirillales(100);unclassified(100);unclassified(100);unclassified(100);unclassified(100);unclassified(100);



[illegible]



Otu0815 0 0 0 0 0 0 0 0 0 0 0 0 0 0 0 0 0 0 0 0 3 0 0 0 0 0 0 0 0  
0 0 1 0 0 0 0 0 0 17 1 0 0 0 0 0 0 0 0 0 0 0 0 0 0 0 0 0 0  
0 0 0 0 0 0 0 0 0 0 0 0 0 0 0 0 0 0 0 0 0 0 0 0 0 0 0 0 0  
0 0 15 0 0 0 0 0 0 0 0 0 0 0 0 0 0 0 0 0 0 0 0 0 0 0 0 0 0  
M02255\_77\_000000000-ADUT3\_1\_1108\_8539\_15257 G---AC---GG--G-GGG-----GCA-A-G-----T--G--T---T--CT-T-CGG-AA-----TG-A--C-T--AG-GT-----GT--A-----AA-GG-GC-AC-----G-TA-G-G-C-G-----G--T-GA-A-T-C-----  
GG---G-T-T-G-----A-A-A--G--CG--A-AA-----G-T-CG-C-C-----AA-A-AA-----T-T-G-G-T-G-G--A-A---T-G--C-T---C-T-----C--GA-A-A--C-----C-A-A--TT--C-A-C---T-T-G-A-G-T--G---A-GA-----CA-G-A-----G-G-A-G---AG-T-----GG--A--ATT---T-C-G-  
T-GTG-GC-A-T-GG-GT--G---A--A---TC-C-TA-AG--AT-C-TA--C-G--A-A-G-G-A-AA-G-CC---AA--A--A--GC-GAA-G--G-C-A-----G--C-T-C-T---CTG--G--GT-C-C-----C-T---A-C-C--GA--CG-C-T-G--G-AG--T-G-CG-A--AA-G-C---A-TG--GG-G--  
AG-C-G-AA-----CG--GG Bacteria(100);unclassified(100);unclassified(100);unclassified(100);unclassified(100);unclassified(100);unclassified(100);unclassified(100);unclassified(100);

Otu0816 0 0 0 0 0 0 0 0 0 0 0 0 0 0 0 0 0 0 0 0 0 0 0 0 0 0 0 0 0  
0 0 0 0 0 0 0 0 0 0 0 0 0 0 28 0 0 0 0 0 0 0 0 0 0 0 0 0  
0 0 0 0 0 0 0 0 0 0 0 0 0 0 0 0 0 0 0 0 0 0 0 0 0 0 0 0 0  
0 0 0 0 0 0 0 0 0 0 0 0 0 0 0 0 0 0 0 0 0 0 0 0 0 0 0 0 0  
M02255\_77\_000000000-ADUT3\_1\_1109\_25304\_16706 T---AC---GG-AG-GGG-----GCA-A-G-----C--G--T---T--GT-T-CGG-AA-----TT-A--C-T--GG-GC-----GT--A-----AA-GG-GC-GC-----G-TA-G-G-C-G-----G--A-AC-A-T-T---  
-----AA---G-T-T-A-----G-G-G--G--TG--A-AA-GG--C-C-TG-G-G-----CT-C-AA-----C-C-T-G-G-G-A--A-C---G-G--C-C---T-C-----T-AA-G-A--C-----T--G-A--TG--A-T-C---T-G-G-A-G-T--C---C-GG---AA-G-A-----G-G-A-T---GG-C-----GG--A--ATT---  
C-C-C-A-GT--GT-A-G-AG-GT--G---A--A---TT-C-GT-AG--AT-A-TT--G-G--G-A-A-G-A-AC-A-CC---GG--T--G--GC-GAA-G--G-C-G-----G--C-C-A-T---CTG--G--TC-C-G-----G-C---A-C-T--GA--CG-C-T-G--A-GG--C-G-CG-A--AA-G-CG---TG--  
GG-G--AG-C-A-AA-----CA--GG Bacteria(100);Proteobacteria(100);unclassified(100);unclassified(100);unclassified(100);unclassified(100);unclassified(100);unclassified(100);unclassified(100);

Otu0817 0 0 0 0 0 0 0 0 0 0 0 0 0 0 0 0 0 0 0 0 2 0 0 0 0 0 0 0 0  
0 0 1 0 0 0 0 0 0 20 0 0 0 0 0 0 0 0 0 0 0 0 0 0 0 0 0 0  
0 0 0 0 0 0 0 0 0 0 0 0 0 0 0 0 0 5 0 0 0 0 0 0 0 0 0  
0 0 0 0 0 0 0 0 0 0 0 0 0 0 0 0 0 0 0 0 0 0 0 0 0 0 0  
M02255\_77\_000000000-ADUT3\_1\_1111\_5162\_14501 T---AC---GT-AG-GGG-----TCG-A-G-----C--G--T---T--GT-C-CGG-AG-----TT-A--C-T--GG-GC-----GT--A-----AA-GC-GC-AT-----G-CA-G-G-C-G-----G--C-TC-A-T-T-----AC-  
---G-C-A-T-----G-G-C--G--TG--A-AA-GC--C-C-CC-G-G-----CT-C-AA-----C-C-G-G-G-G-A--G-G---G-T--C-G---T-C-----G--TG-A-A--C-----G--G-G--TG--A-G-C---T-T-G-A-G-G--G---T-AT---CA-G-G-----G-G-C-T---GG-T-----GG--A--ATT---C-C-C-G-  
GT--GT-A-G-TG-GT--G---A--A---TG-C-GT-AG--AG-A-TC--G-G--G-A-G-G-A-AC-A-CC---TG--T---GGC-GAA-G--G-C-G-----G--C-C-A-G---CTG--G--GA-T-A-----C-A---C-C-T--GA--CG-C-T-G--A-GA--T-G-CG-A--AG-G-C---GTGG--G--G--AG-  
C-G-AA-----CG--GG Bacteria(100);Chloroflexi(100);Thermomicrobia(100);JG30-KF-CM45(100);unclassified(100);unclassified(100);unclassified(100);unclassified(100);unclassified(100);

Otu0818 0 0 0 0 0 0 0 0 0 0 0 0 0 0 0 0 0 0 0 0 0 0 0 0 0 0 0 0  
0 0 0 0 0 0 0 0 0 0 0 0 0 0 114 0 0 0 0 0 0 0 0 0 0 0 0 0  
0 0 0 0 0 0 0 0 0 0 0 0 0 0 0 0 0 0 0 0 0 0 0 0 0 0 0 0  
0 0 0 0 0 0 0 0 0 0 0 0 0 0 0 0 0 0 0 0 0 0 0 0 0 0 0  
M02255\_77\_000000000-ADUT3\_1\_1109\_13260\_6368 T---AC---GG-AG-GGG-----GCT-A-G-----C--G--T---T--GT-T-CGG-AA-----TT-A--C-T--GG-GC-----GT--A-----AA-GC-GC-AC-----G-TA-G-G-C-G-----G--T-TG-C-T-C-----AA-  
---G-T-C-A-----G-A-G--G--TG--A-AA-GC--C-T-GG-A-G-----CT-C-AA-----C-T-C-C-A-G-A--A-C---T-G--C-C---T-T-----T--GA-A-A--C-----T--A-G--GC--A-A-C---T-T-G-A-A-C--G---T-CG---GA-G-A-----G-G-T-G---AG-T-----GG--A--ATT---C-C-G-A-  
GT--GT-A-G-AG-GT--G---A--A---TT-C-GT-AG--AT-A-TT--C-G--G-A-A-G-A-AC-A-CC---AG--T--G--GC-GAA-G--G-C-G-----G--C-T-C-A---CTG--G--AC-G-A-----C-T---G-T-T--GA--CG-C-T-G--A-GG--T-G-CG-A--AA-G-C---G-TG--GG-G--AG-  
C-A-AA-----CA--GG Bacteria(100);Proteobacteria(100);Alphaproteobacteria(100);Sphingomonadales(100);unclassified(100);unclassified(100);unclassified(100);unclassified(100);unclassified(100);

Otu0819 0 0 0 0 0 0 0 0 0 0 0 0 0 0 0 0 0 0 0 0 3 0 0 0 0 0 0 0 0  
0 4 0 0 0 0 0 0 0 28 0 0 0 0 0 0 0 0 0 0 0 0 0 0 0 0 0 0  
0 0 0 0 0 0 0 0 0 0 0 0 0 0 0 0 0 0 0 0 0 0 0 0 0 0 0  
0 0 0 0 0 0 0 0 0 0 0 0 0 0 0 0 0 0 0 0 0 0 0 0 0 0 0  
M02255\_77\_000000000-ADUT3\_1\_1119\_12401\_20327 T---AC---GA-AG-GGG-----GCT-A-G-----C--G--T---T--GC-T-CGG-AA-----TT-A--C-T--GG-GC-----GT--A-----AA-GG-GC-GC-----G-TA-G-G-C-G-----G--A-TA-T-T-T-----  
-----AA---G-T-C-G-----G-G-G--G--TG--A-AA-GC--C-C-AG-G-G-----CT-C-AA-----C-C-C-T-G-G-A--A-C---A-G--C-C---T-T-----C--GA-T-A--C-----T--G-G--AT--A-T-C---T-T-G-A-G-T--A---C-GG---GA-G-A-----G-G-T-G---TG-T-----GG--A--ACT---  
C-C-G-A-GT--GT-A-G-AG-GT--G---A--A---TT-C-GT-AG--AT-A-TT--C-G--G-A-A-G-A-AC-A-CC---AG--T--G--GC-GAA-G--G-C-G-----A--C-A-C-A---CTG--G--CC-C-G-----T-T---A-C-T--GA--CG-C-T-G--A-GG--C-G-CG-A--AA-G-C---G-TG--GG-G--AG-  
G--AG-C-A-AA-----CA--GG Bacteria(100);Proteobacteria(100);Alphaproteobacteria(100);Caulobacterales(100);Caulobacteraceae(100);unclassified(100);unclassified(100);unclassified(100);unclassified(100);



|         |                                              |   |    |   |   |   |   |   |   |    |                                                                                                                                                                                                                                                                                                                                                                                                                                                                                                                                                                                                   |   |   |   |   |   |   |   |   |   |   |   |   |   |   |                                                                                                                                                                         |   |   |  |  |  |  |  |  |  |
|---------|----------------------------------------------|---|----|---|---|---|---|---|---|----|---------------------------------------------------------------------------------------------------------------------------------------------------------------------------------------------------------------------------------------------------------------------------------------------------------------------------------------------------------------------------------------------------------------------------------------------------------------------------------------------------------------------------------------------------------------------------------------------------|---|---|---|---|---|---|---|---|---|---|---|---|---|---|-------------------------------------------------------------------------------------------------------------------------------------------------------------------------|---|---|--|--|--|--|--|--|--|
| Otu0820 | 0                                            | 0 | 0  | 0 | 0 | 0 | 0 | 0 | 0 | 0  | 0                                                                                                                                                                                                                                                                                                                                                                                                                                                                                                                                                                                                 | 0 | 0 | 0 | 0 | 0 | 0 | 1 | 0 | 0 | 0 | 0 | 0 | 0 | 0 | 0                                                                                                                                                                       | 0 |   |  |  |  |  |  |  |  |
|         | 0                                            | 0 | 0  | 0 | 0 | 0 | 0 | 0 | 0 | 0  | 0                                                                                                                                                                                                                                                                                                                                                                                                                                                                                                                                                                                                 | 0 | 0 | 0 | 0 | 0 | 0 | 0 | 0 | 0 | 0 | 0 | 0 | 0 | 0 | 0                                                                                                                                                                       | 0 |   |  |  |  |  |  |  |  |
|         | 0                                            | 0 | 0  | 1 | 0 | 0 | 0 | 0 | 1 | 0  | 0                                                                                                                                                                                                                                                                                                                                                                                                                                                                                                                                                                                                 | 0 | 0 | 0 | 0 | 0 | 0 | 0 | 0 | 0 | 0 | 0 | 0 | 0 | 0 | 0                                                                                                                                                                       | 0 |   |  |  |  |  |  |  |  |
|         | 0                                            | 0 | 0  | 0 | 0 | 0 | 0 | 0 | 0 | 0  | 0                                                                                                                                                                                                                                                                                                                                                                                                                                                                                                                                                                                                 | 0 | 0 | 0 | 0 | 0 | 0 | 0 | 0 | 0 | 0 | 0 | 0 | 0 | 0 | 0                                                                                                                                                                       | 0 |   |  |  |  |  |  |  |  |
|         | M02255_76_000000000-ADUNE_1_2101_12372_24548 |   |    |   |   |   |   |   |   |    | T---AC---CG-AC-AGA-----ATA-A-G---C---A---C-CG-G-CTA-AC-----TC-T--G-T--GC-CA-----GC--AG---CC-GC-GG-TA-----A-TACA-G-A-G-----G--T-GT-G-C-A-----AGC---G-T-T-G-----A-A-T--C--GG--A-AA-TC--C-C-CG-G-G---CT-C-AA-----C-C-T-G-G-G-A-A-C---T-G--C-A---T--C-----C-AA-A-A--C-----T-G-G--CA--A-G-C---T-A-G-A-G-T-A--T-GG---TA-G-A-----G-G-G-T--AG-T-----GG--A--ATT---T-C-C-T-GT--GT-A-G-CG-GT--G---A-A-A---TG-C-GT-AG--AT-A-TA--G-G--A-A-G-G-A-AC-A-CC--AG--T--G--GC-GAA-G--G-C-G-----A-C-T-A-C---CTG--G--AC-T-G-----A-T--A-C-T--GA--CA-C-T-G--A-GG--T-G-CG-A--AA-G-C--G-TG--GG-G--AG-C-A-AA-----CA--GG       |   |   |   |   |   |   |   |   |   |   |   |   |   |   | Bacteria(100);Proteobacteria(100);Gammaproteobacteria(100);unclassified(100);unclassified(100);unclassified(100);unclassified(100);unclassified(100);unclassified(100); |   |   |  |  |  |  |  |  |  |
| Otu0821 | 0                                            | 0 | 0  | 0 | 0 | 0 | 0 | 0 | 0 | 0  | 0                                                                                                                                                                                                                                                                                                                                                                                                                                                                                                                                                                                                 | 0 | 0 | 0 | 0 | 0 | 0 | 0 | 0 | 0 | 0 | 0 | 0 | 0 | 0 | 0                                                                                                                                                                       | 0 |   |  |  |  |  |  |  |  |
|         | 0                                            | 0 | 3  | 0 | 0 | 0 | 0 | 0 | 1 | 28 | 0                                                                                                                                                                                                                                                                                                                                                                                                                                                                                                                                                                                                 | 0 | 0 | 0 | 0 | 0 | 0 | 0 | 0 | 0 | 0 | 0 | 0 | 0 | 0 | 0                                                                                                                                                                       | 0 |   |  |  |  |  |  |  |  |
|         | 0                                            | 0 | 0  | 0 | 0 | 0 | 0 | 0 | 0 | 0  | 0                                                                                                                                                                                                                                                                                                                                                                                                                                                                                                                                                                                                 | 0 | 0 | 0 | 0 | 0 | 0 | 0 | 0 | 0 | 0 | 0 | 0 | 0 | 0 | 0                                                                                                                                                                       | 0 |   |  |  |  |  |  |  |  |
|         | 0                                            | 0 | 0  | 0 | 0 | 0 | 0 | 0 | 0 | 0  | 0                                                                                                                                                                                                                                                                                                                                                                                                                                                                                                                                                                                                 | 0 | 0 | 0 | 0 | 0 | 0 | 0 | 0 | 0 | 0 | 0 | 0 | 0 | 0 | 0                                                                                                                                                                       | 0 |   |  |  |  |  |  |  |  |
|         | M02255_77_000000000-ADUT3_1_2119_19219_10339 |   |    |   |   |   |   |   |   |    | T---AC---GT-AG-GTG-----TCA-A-G---C-G--T---T--GT-C-CGG-AT-----TT-A--T-T--GG-GC-----GT--A---AA-GC-GC-CC-----G-CA-G-G-C-G-----G--C-TT-G-G-C-----AA---G-T-T-C-----G-A-G--G--TG--A-AA-TC--T-C-CC-G-G---CT-C-AA-----C-T-G-G-G-A-G--G-C---T-G--C-C---T--C-----G-AA-A-A--C-----T-G-C--TA--G-G-C---T-T-G-A-G-G--C---A-GG---GA-G-A-----G-G-G-A--TG-T-----GG--A--ATT---C-C-C-G-GT--GT-A-G-TG-GT--G---A-A-A---TG-C-GT-AG--AT-A-TC--G-G--G-A-G-G-A-AC-A-CC--AG--T--G--GC-GAA-G--G-C-G-----G--C-A-T-C---CTG--GC-CC---T-----G-T--C-C-T--GA--CG-C-T-C--A-GG--G-G-CG-A--AA-G-C--G-TG--GG-G--AG-C-A-AA-----CC--GG   |   |   |   |   |   |   |   |   |   |   |   |   |   |   | Bacteria(100);Chloroflexi(100);TK10(100);unclassified(100);unclassified(100);unclassified(100);unclassified(100);unclassified(100);unclassified(100);                   |   |   |  |  |  |  |  |  |  |
| Otu0822 | 0                                            | 0 | 0  | 0 | 0 | 0 | 0 | 0 | 0 | 0  | 0                                                                                                                                                                                                                                                                                                                                                                                                                                                                                                                                                                                                 | 0 | 0 | 1 | 0 | 0 | 0 | 0 | 0 | 0 | 0 | 0 | 0 | 0 | 0 | 8                                                                                                                                                                       | 0 | 0 |  |  |  |  |  |  |  |
|         | 0                                            | 0 | 0  | 0 | 0 | 0 | 0 | 0 | 0 | 0  | 0                                                                                                                                                                                                                                                                                                                                                                                                                                                                                                                                                                                                 | 0 | 0 | 0 | 0 | 0 | 0 | 0 | 0 | 0 | 0 | 0 | 0 | 0 | 0 | 0                                                                                                                                                                       | 0 |   |  |  |  |  |  |  |  |
|         | 0                                            | 0 | 0  | 0 | 0 | 0 | 0 | 0 | 0 | 0  | 0                                                                                                                                                                                                                                                                                                                                                                                                                                                                                                                                                                                                 | 0 | 0 | 0 | 0 | 0 | 7 | 0 | 0 | 0 | 0 | 0 | 0 | 0 | 0 | 0                                                                                                                                                                       | 0 |   |  |  |  |  |  |  |  |
|         | 0                                            | 0 | 0  | 0 | 0 | 0 | 0 | 0 | 0 | 0  | 0                                                                                                                                                                                                                                                                                                                                                                                                                                                                                                                                                                                                 | 0 | 0 | 0 | 0 | 0 | 0 | 0 | 0 | 0 | 0 | 0 | 0 | 0 | 0 | 0                                                                                                                                                                       | 0 |   |  |  |  |  |  |  |  |
|         | M02255_76_000000000-ADUNE_1_1110_27402_11160 |   |    |   |   |   |   |   |   |    | C---A---GC-A-GCC-----GCG-G-T-----A--A--T---A--CG-G-AGG-GT-----GC-A--A-G-CG-TT-----AC--C---CG-GA-AT-CA-----C-TG-G-G-C-G-----G--C-CT-G-C-C-----AA---G-T-C-T-----G-G-T--T--TT--A-AA-GC--C-T-GC-G-G---CT-C-AA-----C-C-G-C-A-G-A--G-A---T-G--G-A--C--T-----G--GA-G-A--C-----T-G-G--TA--G-G-C---T-A-G-A-C-C--T---C-TG---GA-G-A-----G-A-G-A--AC-T-----GG--A--ATT---C-C-T-G-GT--GT-A-G-CG-GT--G---G--A-A---TG-C-GT-AG--AT-A-CC--A-G--G-A-G-G-A-AC-A-CC--GA--T--G--GC-GAA-G--G-C-A-----G--G-T-T-C---TTG--G--AC-A-G-----A-A---G-G-T--GA--CG-C-T-G--A-GG--C-G-CG-A--AA-G-T--G-TG--GG-G--AG-C-A-AA-----CC--GG |   |   |   |   |   |   |   |   |   |   |   |   |   |   | Bacteria(100);Deinococcus-Thermus(100);Deinococcales(100);Deinococcaceae(100);Deinococcus(100);unclassified(100);unclassified(100);unclassified(100);unclassified(100); |   |   |  |  |  |  |  |  |  |
| Otu0823 | 0                                            | 0 | 0  | 0 | 0 | 0 | 0 | 0 | 0 | 0  | 0                                                                                                                                                                                                                                                                                                                                                                                                                                                                                                                                                                                                 | 0 | 0 | 1 | 0 | 0 | 0 | 0 | 0 | 0 | 0 | 0 | 0 | 0 | 0 | 0                                                                                                                                                                       | 0 |   |  |  |  |  |  |  |  |
|         | 0                                            | 0 | 58 | 0 | 0 | 0 | 0 | 0 | 0 | 0  | 24                                                                                                                                                                                                                                                                                                                                                                                                                                                                                                                                                                                                | 0 | 0 | 0 | 0 | 0 | 0 | 0 | 0 | 0 | 0 | 0 | 0 | 0 | 0 | 0                                                                                                                                                                       | 0 |   |  |  |  |  |  |  |  |
|         | 0                                            | 0 | 0  | 0 | 0 | 0 | 0 | 0 | 0 | 0  | 0                                                                                                                                                                                                                                                                                                                                                                                                                                                                                                                                                                                                 | 0 | 0 | 0 | 0 | 0 | 0 | 0 | 0 | 0 | 0 | 0 | 0 | 0 | 0 | 0                                                                                                                                                                       | 0 |   |  |  |  |  |  |  |  |
|         | 0                                            | 0 | 0  | 0 | 0 | 0 | 0 | 0 | 0 | 0  | 0                                                                                                                                                                                                                                                                                                                                                                                                                                                                                                                                                                                                 | 0 | 0 | 0 | 0 | 0 | 0 | 0 | 0 | 0 | 0 | 0 | 0 | 0 | 0 | 0                                                                                                                                                                       | 0 |   |  |  |  |  |  |  |  |
|         | M02255_77_000000000-ADUT                     |   |    |   |   |   |   |   |   |    |                                                                                                                                                                                                                                                                                                                                                                                                                                                                                                                                                                                                   |   |   |   |   |   |   |   |   |   |   |   |   |   |   |                                                                                                                                                                         |   |   |  |  |  |  |  |  |  |



[illegible]



|                                                                                                                                                                                                                            |   |     |   |   |   |   |   |   |   |                                                                                                                                                        |   |    |   |    |    |    |   |    |   |   |    |    |    |    |   |   |   |   |   |
|----------------------------------------------------------------------------------------------------------------------------------------------------------------------------------------------------------------------------|---|-----|---|---|---|---|---|---|---|--------------------------------------------------------------------------------------------------------------------------------------------------------|---|----|---|----|----|----|---|----|---|---|----|----|----|----|---|---|---|---|---|
| Otu0830                                                                                                                                                                                                                    | 0 | 0   | 0 | 0 | 0 | 0 | 0 | 0 | 0 | 0                                                                                                                                                      | 0 | 0  | 0 | 0  | 0  | 0  | 4 | 0  | 0 | 0 | 0  | 0  | 0  | 1  | 0 | 0 | 0 | 0 | 0 |
|                                                                                                                                                                                                                            | 0 | 0   | 0 | 0 | 0 | 0 | 0 | 0 | 0 | 0                                                                                                                                                      | 0 | 0  | 0 | 0  | 0  | 0  | 0 | 0  | 0 | 0 | 0  | 0  | 0  | 0  | 0 | 0 | 0 | 0 | 0 |
|                                                                                                                                                                                                                            | 0 | 0   | 0 | 0 | 0 | 0 | 0 | 0 | 0 | 0                                                                                                                                                      | 0 | 0  | 0 | 0  | 0  | 0  | 0 | 0  | 0 | 0 | 0  | 0  | 0  | 0  | 0 | 0 | 0 | 0 | 0 |
|                                                                                                                                                                                                                            | 0 | 0   | 0 | 0 | 0 | 0 | 0 | 0 | 0 | 0                                                                                                                                                      | 0 | 0  | 0 | 0  | 0  | 0  | 0 | 0  | 0 | 0 | 0  | 0  | 0  | 0  | 0 | 0 | 0 | 0 | 0 |
| M02255_76_000000000-ADUNE_1_1109_14064_10115                                                                                                                                                                               |   |     |   |   |   |   |   |   |   | T---AT---CT-AA-CCA-----GAA-A-G-----C--C--A--C--G--G-C-T-AA-----CT-A--C-G--TG-CC-----AG--C----AG-CC-GC-GG-----T-AA-T-A-C-GT-----A--G-GT-G-G-C-----      |   |    |   |    |    |    |   |    |   |   |    |    |    |    |   |   |   |   |   |
| ----AA----GCG-T-T-----G-T-C--C--GG--A-AA-GC--C-C-CC-G-G----CT-C-AA-----C-C-G-G-G-G-A--G-----G-GG-C-A--T--T-----G--GA-A-A--C-----T--G-G--GA--G-A-C---T-T-G-A-G-G--A--C-AG-----AA-G-A-----G-G-A-G---AG-T-----GG--A--ATT----  |   |     |   |   |   |   |   |   |   |                                                                                                                                                        |   |    |   |    |    |    |   |    |   |   |    |    |    |    |   |   |   |   |   |
| C-C-A-A-GT--GT-A-G-CG-GT--G---A--A---TG-C-GT-AG--AT-A-TT--T-G--G-A-G-G-A-AC-A-CC--AG--T--G--GC-GAA-G--G-C--G-----G--C-T-C-T--CTG--G--TC-T-G-----T-T---A-C-T--GA--CG-C-T-G--A-GG--C-G-CG-A--AA-G-C--G-TG--GG-               |   |     |   |   |   |   |   |   |   |                                                                                                                                                        |   |    |   |    |    |    |   |    |   |   |    |    |    |    |   |   |   |   |   |
| G--AG-C-A-AA-----CA--GG     Bacteria(100);Firmicutes(100);Bacilli(100);Bacillales(100);unclassified(100);unclassified(100);unclassified(100);unclassified(100);unclassified(100);                                          |   |     |   |   |   |   |   |   |   |                                                                                                                                                        |   |    |   |    |    |    |   |    |   |   |    |    |    |    |   |   |   |   |   |
| Otu0831                                                                                                                                                                                                                    | 0 | 0   | 0 | 0 | 0 | 0 | 0 | 0 | 0 | 0                                                                                                                                                      | 0 | 0  | 0 | 0  | 0  | 0  | 0 | 0  | 0 | 0 | 0  | 0  | 0  | 0  | 0 | 0 | 0 | 0 | 0 |
|                                                                                                                                                                                                                            | 0 | 0   | 0 | 0 | 0 | 0 | 0 | 0 | 0 | 0                                                                                                                                                      | 0 | 0  | 0 | 0  | 0  | 42 | 0 | 0  | 0 | 0 | 0  | 0  | 0  | 0  | 0 | 0 | 0 | 0 | 0 |
|                                                                                                                                                                                                                            | 0 | 0   | 0 | 0 | 0 | 0 | 0 | 0 | 0 | 0                                                                                                                                                      | 0 | 0  | 0 | 0  | 0  | 0  | 0 | 0  | 0 | 0 | 0  | 0  | 0  | 0  | 0 | 0 | 0 | 0 | 0 |
|                                                                                                                                                                                                                            | 0 | 0   | 0 | 0 | 0 | 0 | 0 | 0 | 0 | 0                                                                                                                                                      | 0 | 0  | 0 | 0  | 0  | 0  | 0 | 0  | 0 | 0 | 0  | 0  | 0  | 0  | 0 | 0 | 0 | 0 | 0 |
| M02255_77_000000000-ADUT3_1_2101_23042_11302                                                                                                                                                                               |   |     |   |   |   |   |   |   |   | T---AC--GT-AG-GAT-----CCG-A-G-----C--G--T--T--AT-C-CGG-AG-----TG-A--C-T--GG-GC-----GT--A----AA-GA-GTTGC-----G-TA-G-G-T-G-----G--T-TA-G-T-A----         |   |    |   |    |    |    |   |    |   |   |    |    |    |    |   |   |   |   |   |
| -----AA---G-C-G-A-----A-T-A--G--TG--A-AA-TC--T-G-GC-G-G----CT-C-AA-----C-C-G-T-ACA-G--G-C---T-A--T-T--A--T-----T--CG-A-A--C-----T--C-A--CT--A-A-C---T-C-G-A-G-A--A--T-GG-----TA-G-A-----G-G-T-T--AC-T-----GG--A--ATT---T-  |   |     |   |   |   |   |   |   |   |                                                                                                                                                        |   |    |   |    |    |    |   |    |   |   |    |    |    |    |   |   |   |   |   |
| C-T-T-GT--GT-A-G-GA-GT--G---A--A---TC-C-GT-AG--AT-A-TA--A-G--A-A-G-G-A-AC-A-CC--AA--T--G--GC-GTA-G--G-C-A-----G--G-T-A-A--CTG--G--AC-C-A-----T-T---T-C-T--GA--CA-C-T-A--A-GG--C-A-CG-A--AA-G-C--G-TG--GG-G--               |   |     |   |   |   |   |   |   |   |                                                                                                                                                        |   |    |   |    |    |    |   |    |   |   |    |    |    |    |   |   |   |   |   |
| AG-C-G-AA-----CC--GG     Bacteria(100);Candidate_division_TM7(100);unclassified(100);unclassified(100);unclassified(100);unclassified(100);unclassified(100);unclassified(100);unclassified(100);                          |   |     |   |   |   |   |   |   |   |                                                                                                                                                        |   |    |   |    |    |    |   |    |   |   |    |    |    |    |   |   |   |   |   |
| Otu0832                                                                                                                                                                                                                    | 0 | 0   | 0 | 0 | 0 | 0 | 0 | 0 | 0 | 0                                                                                                                                                      | 0 | 0  | 0 | 0  | 0  | 1  | 0 | 0  | 1 | 0 | 0  | 0  | 0  | 0  | 0 | 0 | 0 | 0 | 0 |
|                                                                                                                                                                                                                            | 0 | 0   | 0 | 0 | 0 | 0 | 0 | 0 | 0 | 0                                                                                                                                                      | 0 | 0  | 0 | 0  | 0  | 0  | 0 | 0  | 0 | 0 | 0  | 0  | 0  | 0  | 0 | 0 | 0 | 0 | 0 |
|                                                                                                                                                                                                                            | 0 | 0   | 0 | 0 | 0 | 0 | 0 | 0 | 0 | 0                                                                                                                                                      | 0 | 0  | 0 | 0  | 0  | 0  | 0 | 0  | 0 | 0 | 0  | 0  | 0  | 0  | 0 | 0 | 0 | 0 | 0 |
|                                                                                                                                                                                                                            | 0 | 0   | 0 | 0 | 0 | 0 | 0 | 0 | 0 | 0                                                                                                                                                      | 0 | 0  | 0 | 0  | 11 | 0  | 0 | 0  | 0 | 0 | 0  | 0  | 0  | 0  | 0 | 0 | 0 | 0 | 0 |
| M02255_76_000000000-ADUNE_1_2112_19484_8441                                                                                                                                                                                |   |     |   |   |   |   |   |   |   | C---TA--AC-TC-TGT-----GCC-A-G-----C----A--G--CC-G-CGG-TA-----AT-A--C-A--GA-GG-----GT--G----CA--A-GC-G-----T-TA-A-T-C-G-----G--A-TT-T-G-T-----AA----    |   |    |   |    |    |    |   |    |   |   |    |    |    |    |   |   |   |   |   |
| G-T-C-T-----G-A-T--G--TG--A-AA-TC--C-C-CG-G-G----CT-C-AA-----C-C-T-G-G-G-A--A-T---T-G--C-A--T--T-----G--GA-G-A--C-----T--G-C--AA--G-G-C---T-A-G-A-A-T--C---T-GG-----CA-G-A-----G-G-G-G---GG-T-----AG--A--ATT---C-C-A-C-GT- |   |     |   |   |   |   |   |   |   |                                                                                                                                                        |   |    |   |    |    |    |   |    |   |   |    |    |    |    |   |   |   |   |   |
| -GT-A-G-CA-GT--G---A--A---TG-C-GT-AG--AT-A-TG--T-G--G-A-G-G-A-AC-A-CC--GA--T--G--GC-GAA-G--G-C-A-----G--C-C-C-C---CTG--G--GT-C-A-----A-G--A-T-T--GA--CG-C-T-C--A-TG--C-A-CG-A--AA-G-C--G-TG--GG-G--AG-C-A-                 |   |     |   |   |   |   |   |   |   |                                                                                                                                                        |   |    |   |    |    |    |   |    |   |   |    |    |    |    |   |   |   |   |   |
| AA-----CA--GG     Bacteria(100);Proteobacteria(100);Betaproteobacteria(100);Burkholderiales(100);Oxalobacteraceae(100);Janthinobacterium(100);unclassified(100);unclassified(100);unclassified(100);                       |   |     |   |   |   |   |   |   |   |                                                                                                                                                        |   |    |   |    |    |    |   |    |   |   |    |    |    |    |   |   |   |   |   |
| Otu0833                                                                                                                                                                                                                    | 0 | 0   | 0 | 0 | 0 | 0 | 0 | 0 | 0 | 0                                                                                                                                                      | 0 | 0  | 0 | 0  | 0  | 0  | 0 | 0  | 0 | 3 | 6  | 0  | 0  | 0  | 0 | 0 | 0 | 0 | 0 |
|                                                                                                                                                                                                                            | 0 | 2   | 0 | 0 | 0 | 0 | 0 | 0 | 0 | 40                                                                                                                                                     | 2 | 0  | 0 | 0  | 0  | 0  | 0 | 0  | 0 | 0 | 0  | 0  | 0  | 0  | 0 | 0 | 0 | 0 | 0 |
|                                                                                                                                                                                                                            | 0 | 0   | 0 | 0 | 0 | 0 | 0 | 0 | 0 | 0                                                                                                                                                      | 0 | 0  | 0 | 0  | 0  | 0  | 0 | 0  | 0 | 0 | 0  | 0  | 0  | 0  | 0 | 0 | 0 | 0 | 0 |
|                                                                                                                                                                                                                            | 0 | 0   | 0 | 0 | 0 | 0 | 0 | 0 | 0 | 0                                                                                                                                                      | 0 | 0  | 0 | 0  | 0  | 0  | 0 | 0  | 0 | 0 | 0  | 0  | 0  | 0  | 0 | 0 | 0 | 0 | 0 |
| M02255_77_000000000-ADUT3_1_2119_23057_9922                                                                                                                                                                                |   |     |   |   |   |   |   |   |   | T---AC--GG-AG-GAG-----GCA-A-G-----C--G--T--T--AT-C-CGG-AA-----TT-A--T-T--GG-GC-----GT--A----AA-GC-GT-CC-----G-TA-G-G-T-G-----G--C-TG-C-T-C-----AA----  |   |    |   |    |    |    |   |    |   |   |    |    |    |    |   |   |   |   |   |
| ---G-T-C-T-----G-C-G--G--TC--A-AA-GA--C-C-GG-G-G----CT-T-AA-----C-C-C-T-G-G-A--A-A---G-G--C-C--G--T-----G--GA-A-A--C-----T--G-A--GC--A-G-C---T-A-G-A-G-T--G---C-AG-----TA-G-G-----G-G-T-A---GA-G-----GG--A--ATT---C-C-C-G- |   |     |   |   |   |   |   |   |   |                                                                                                                                                        |   |    |   |    |    |    |   |    |   |   |    |    |    |    |   |   |   |   |   |
| GT--GT-A-G-CG-GT--G---A--A---TG-C-GT-AG--AG-C-TC--G-G--G-A-A-G-A-AC-A-TC--GG--T--G--GC-GAA-A--G-C--G-----C--T-C-T-A---CTG--G--AC-T-G-----C-A---A-C-T--GA--CG-C-T-G--A-GG--G-A-CG-A--AA-G-C---T-AG--GG-G--AG-               |   |     |   |   |   |   |   |   |   |                                                                                                                                                        |   |    |   |    |    |    |   |    |   |   |    |    |    |    |   |   |   |   |   |
| C-G-AA-----TG--GG     Bacteria(100);Cyanobacteria(100);SubsectionIII(100);unclassified(100);unclassified(100);unclassified(100);unclassified(100);unclassified(100);unclassified(100);                                     |   |     |   |   |   |   |   |   |   |                                                                                                                                                        |   |    |   |    |    |    |   |    |   |   |    |    |    |    |   |   |   |   |   |
| Otu0834                                                                                                                                                                                                                    | 0 | 0   | 0 | 0 | 0 | 0 | 0 | 0 | 0 | 0                                                                                                                                                      | 0 | 0  | 0 | 0  | 0  | 0  | 9 | 0  | 0 | 0 | 0  | 0  | 0  | 12 | 0 | 0 | 0 | 0 | 0 |
|                                                                                                                                                                                                                            | 0 | 0   | 0 | 0 | 0 | 0 | 0 | 0 | 0 | 0                                                                                                                                                      | 0 | 0  | 0 | 0  | 0  | 0  | 0 | 0  | 0 | 0 | 0  | 0  | 0  | 0  | 0 | 0 | 0 | 0 | 0 |
|                                                                                                                                                                                                                            | 0 | 299 | 0 | 0 | 0 | 0 | 0 | 0 | 0 | 8                                                                                                                                                      | 0 | 0  | 0 | 17 | 0  | 0  | 0 | 13 | 0 | 0 | 87 | 12 | 14 | 0  | 0 | 0 | 0 | 0 | 0 |
|                                                                                                                                                                                                                            | 0 | 0   | 0 | 0 | 0 | 0 | 0 | 0 | 0 | 0                                                                                                                                                      | 2 | 62 | 5 | 0  | 0  | 0  | 0 | 0  | 0 | 0 | 0  | 0  | 0  | 0  | 0 | 1 | 0 | 0 | 0 |
| M02255_77_000000000-ADUT3_1_1112_4415_10453                                                                                                                                                                                |   |     |   |   |   |   |   |   |   | T---AC--GT-AT-GTC-----GCA-A-G-----C--G--T---T--AT-C-CGG-AA-----TT-A--T-T--GG-GC-----TT--A----AA-GG-GC-AT-----C-TA-G-G-C-G-----G--T-AT-A-A-C-----AA---- |   |    |   |    |    |    |   |    |   |   |    |    |    |    |   |   |   |   |   |
| -G-T-T-G-----A-A-G--G--TG--A-AA-AG--C-T-GT-A-G----CT-C-AA-----C-T-A-T-A-G-T--C-T---T-G--C-C---T--A-----C--AA-A-A--C-----T--G-T-AA--T-A-C---T-A-G-A-G-T-A--C-TG-----GA-A-A-----G-G-T-G---GG-T-----GG--A--ACT---A-C-A-C-GA-  |   |     |   |   |   |   |   |   |   |                                                                                                                                                        |   |    |   |    |    |    |   |    |   |   |    |    |    |    |   |   |   |   |   |
| -GT-A-G-AG-GT--G---A--A---TT-C-GT-AG--AT-A-TG--T-G--T-A-G-G-A-AT-G-CC--GA--T--G--AT-GAA-G--A-T-A-----A--C-T-C-A---CTG--G--AC-A-G-----A-A---A-C-T--GA--CG-C-T-G--A-AG--T-G-CG-A--AA-G-C---T-AG--GG-G--AG-C-A-               |   |     |   |   |   |   |   |   |   |                                                                                                                                                        |   |    |   |    |    |    |   |    |   |   |    |    |    |    |   |   |   |   |   |
| AA-----CA--GG     Bacteria(100);Fusobacteria(100);Fusobacteria(100);Fusobacteriales(100);Leptotrichiaceae(100);unclassified(100);unclassified(100);unclassified(100);unclassified(100);                                    |   |     |   |   |   |   |   |   |   |                                                                                                                                                        |   |    |   |    |    |    |   |    |   |   |    |    |    |    |   |   |   |   |   |



Otu0835      0      0      0      0      0      0      0      0      0      0      0      0      0      0      0      0      10      0      0      0      0      0      0      0      0      0      0  
0      0      0      0      0      0      0      0      0      0      0      0      0      0      0      0      0      0      0      0      0      0      0      0      0      0      0      0  
0      0      0      0      0      0      0      0      0      0      0      0      0      0      0      0      0      0      0      0      0      0      0      0      0      0      0      0  
0      0      0      0      0      0      0      0      0      0      0      0      0      0      0      0      0      0      0      0      0      0      0      0      0      0      0      0  
M02255\_77\_000000000-ADUT3\_1\_2102\_25699\_4028 T---AC---GA-AG-GGG-----GCT-A-G-----C--G--T---T--GC-T-CGG-AA-----TG-A-C-T--GG-GC-----GT--A----AA-GG-GC-GC-----G-TA-G-G-C-G-----G--T-TT-G-C-C-----  
AA---G-T-T-A-----G-A-T--G--TG--A-AA-TT--C-C-TG-G-G----CT-T-AA-----C-C-T-G-G-G-G--G-C---T-G--C-A---T--T-----T--GA-T-A---C-----T--G-G--CA--G-G-C---T-T-G-A-G-T-A---T-GG-----AA-G-A-----G-G-G-T--CG-T-----GG--A--ATT---C-C-C-  
A-GT--GT-A-G-AG-GT--G---A--A-A---TT-C-GT-AG--AT-A-TT--G-G--G-A-A-G-A-AC-A-CC---GG--T--G--GC-GAA-G--G-C--G-----G--C-G-A-C---CTG--G--TC-C-A-----T-A---A-C-T--GA--CG-C-T-G--A-GG--C-G-CG-A--AA-G-C---G-TG--GG-G--  
AG-C-A-AA-----CA--GG      Bacteria(100);Proteobacteria(100);Alphaproteobacteria(100);Rhodospirillales(100);Acetobacteraceae(100);unclassified(100);unclassified(100);unclassified(100);unclassified(100);

Otu0836      0      0      0      0      0      0      0      0      0      0      0      0      0      0      0      0      0      0      0      0      0      0      0      0      0      0      0      0  
0      0      0      0      0      0      0      0      0      0      0      0      0      0      33      0      0      0      0      0      0      0      0      0      0      0      0      0      0  
0      0      0      0      0      0      0      0      0      0      0      0      0      0      0      0      0      0      0      16      0      0      0      0      0      0      0      0      0  
0      0      0      0      0      0      0      0      0      0      0      0      0      0      19      0      0      0      0      0      0      0      0      0      0      0      0      0      0  
M02255\_77\_000000000-ADUT3\_1\_1114\_20016\_19866      T---AC---GT-AG-GGT-----GCG-A-G-----C--G--T---T--GT-C-CGG-AA-----TT-A-T-T--GG-GC-----GT--A----AA-GA-GC-TC-----G-TA-G-G-C-G-----G--T-CT-G-T-C-----  
-----GC---G-T-C-G-----A-A-T--G--TG--A-AA-AC--C-C-GG-G-G----CT-C-AA-----C-T-C-C-G-G-G--C-T---T-G--C-A---T--T-----C--GA-T-A---C-----G--G-G--CA--G-G-C---T-A-G-A-G-T-T---C-GG-----TA-G-G-----G-G-A-G---TC-T-----GG--A--ATT---C-  
C-T-G-GT--GT-A-G-CG-GT--G---A--A-A---TG-C-GC-AG--AT-A-TC--A-G--G-A-G-G-A-AC-A-CC---GG--T--G--GC-GAA-G--G-C--G-----G--G-A-C-T---CTG--G--GC-C-G-----A-T---A-C-T--GA--CG-C-T-G--A-GG--A-G-CG-A--AA-G-C---G-TG--GG-  
G--AG-C-G-AA-----CA--GG      Bacteria(100);Actinobacteria(100);Actinobacteria(100);Actinobacteridae(100);Actinomycetales(100);Frankineae(100);unclassified(100);unclassified(100);unclassified(100);

Otu0837      0      0      0      0      0      0      0      0      0      0      0      0      0      0      0      0      0      0      0      0      0      0      0      0      0      0      0      0  
0      0      0      0      0      0      0      0      0      0      0      0      0      0      19      0      0      0      0      0      0      0      0      0      0      0      0      0      0  
0      0      0      0      0      0      0      0      0      0      0      0      0      0      0      0      0      0      0      0      0      0      0      0      0      0      0      0      0  
0      0      0      0      0      0      0      0      0      0      0      0      0      0      0      0      0      0      0      0      0      0      0      0      0      0      0      0      0  
M02255\_77\_000000000-ADUT3\_1\_1113\_25546\_15628      T---AC---GT-AG-GGG-----TCG-A-G-----C--G--T---T--GT-C-CGG-AG-----TT-A-C-T--GG-GC-----GT--A----AA-GC-GT-GC-----G-CA-G-G-C-G-----G--C-GG-T-C-T-----  
-----GC---G-C-C-C-----G-G-C--G--TG--A-AA-GC--C-C-CC-G-G----CT-C-AA-----C-C-G-G-G-G-A--G-G---G-T--C-G---T--C-----G--GG-G-A---C-----G--G-G--AC--C-G-C---T-T-G-A-G-G-G---T-AT-----CA-G-G-----G-G-C-T---GG-T-----GG--A--ATT---  
-C-C-C-G-GT--GT-A-G-TG-GT--G---A--A-A---TG-C-GT-AG--AG-A-TC--G-G--G-A-G-G-A-AC-A-CC---CG--T--G--GC-GAA-G--G-C--G-----G--C-C-A-G---CTG--G--GA-T-A-----C-A---C-C-T--GA--CG-C-T-G--A-GG--C-A-CG-A--AG-G-C---G-TG--  
GG-G--AG-C-G-AA-----CG--GG Bacteria(100);Chloroflexi(100);Thermomicrobia(100);JG30-KF-CM45(100);unclassified(100);unclassified(100);unclassified(100);unclassified(100);unclassified(100);

Otu0838      0      0      0      0      0      0      0      0      0      0      0      0      0      0      0      0      0      0      0      0      0      0      0      0      0      0      0      0  
0      0      0      0      0      0      0      0      0      0      0      0      0      0      22      0      0      0      0      0      0      0      0      0      0      0      0      0      0  
0      0      0      0      0      0      0      0      0      0      0      0      0      0      0      0      0      0      0      0      0      0      0      0      0      0      0      0      0  
0      0      0      0      0      0      0      0      0      0      0      0      0      0      0      0      0      0      0      0      0      0      0      0      0      0      0      0      0  
M02255\_77\_000000000-ADUT3\_1\_1113\_5925\_6452      T---AC---GA-AG-GGG-----GCT-A-G-----C--G--T---T--GC-T-CGG-AA-----TG-A-C-T--GG-GC-----GT--A----AA-GG-GC-GC-----G-TA-G-G-C-G-----G--T-TT-G-G-A-----  
CA---G-T-C-A-----G-A-T--G--TG--A-AA-TT--C-C-CG-G-G----CT-T-AA-----C-C-T-G-G-G-G--G-C---T-G--C-A---T--T-----T--GA-G-A---C-----G--T-C--CA--G-G-C---T-T-G-A-G-T-G---T-GA----GA-G-A-----G-G-G-T---TG-T-----GG--A--ATT---C-C-C-  
A-GT--GT-A-G-AG-GT--G---A--A-A---TT-C-GT-AG--AT-A-TT--G-G--G-A-A-G-A-AC-A-CC---GG--T--G--GC-GAA-G--G-C--G-----G--C-A-A-C---CTG--G--CT-C-A-----T-G---A-C-T--GA--CG-C-T-G--A-GG--C-G-CG-A--AA-G-C---G-TG--GG-G--  
AG-C-A-AA-----CA--GG      Bacteria(100);Proteobacteria(100);Alphaproteobacteria(100);Rhodospirillales(100);Acetobacteraceae(100);unclassified(100);unclassified(100);unclassified(100);unclassified(100);

Otu0839      0      0      0      0      0      0      0      0      0      0      0      0      0      0      0      0      0      0      0      0      0      0      0      0      0      0      0      0  
0      0      0      0      0      0      0      0      0      0      0      0      0      0      61      0      0      0      0      0      0      0      0      0      0      0      0      0      0  
0      0      0      0      0      0      0      0      0      0      0      0      0      0      0      0      0      0      0      0      0      0      0      0      0      0      0      0      0  
0      0      0      0      0      0      0      0      0      0      0      0      0      0      0      0      0      0      0      0      0      0      0      0      0      0      0      0      0  
M02255\_77\_000000000-ADUT3\_1\_1110\_26846\_14999      T---AC---GA-AG-GGG-----GCT-A-G-----C--G--T---T--AC-T-CGG-AA-----TG-A--C-T--GG-GC-----GT--A----AA-GG-GC-GC-----G-TA-G-G-C-G-----G--T-TT-G-T-A-----  
-----CA---G-T-C-A-----G-G-C--G--TG--A-AA-TT--C-C-TG-G-G----CT-T-AA-----C-C-T-G-G-G-G--G-C---T-G--C-G---T--T-----T--GA-T-A---C-----G--T-G--CA--G-A-C---T-A-G-A-G-T-G---G-GG-----AA-G-A-----G-G-G-T---CG-T-----GG--A--ATT---  
C-C-C-A-GT--GT-A-G-AG-GT--G---A--A-A---TT-C-GT-AG--AT-A-TT--G-G--G-A-A-G-A-AC-A-CC---GG--T--G--GC-GAA-G--G-C--G-----G--C-G-A-C---CTG--G--TC-C-T-----T-G---A-C-T--GA--CG-C-T-G--A-GG--C-G-CG-A--AA-G-C---G-TG--  
GG-G--AG-C-A-AA-----CA--GG Bacteria(100);Proteobacteria(100);Alphaproteobacteria(100);Rhodospirillales(100);Acetobacteraceae(100);unclassified(100);unclassified(100);unclassified(100);unclassified(100);



|                                                                                                                                                                                                                          |   |   |   |   |   |   |   |   |    |   |   |   |   |   |    |   |   |   |   |   |   |   |   |     |   |   |  |  |
|--------------------------------------------------------------------------------------------------------------------------------------------------------------------------------------------------------------------------|---|---|---|---|---|---|---|---|----|---|---|---|---|---|----|---|---|---|---|---|---|---|---|-----|---|---|--|--|
| Otu0840                                                                                                                                                                                                                  | 0 | 0 | 0 | 0 | 0 | 0 | 0 | 0 | 0  | 0 | 0 | 0 | 0 | 0 | 0  | 0 | 0 | 0 | 0 | 0 | 0 | 0 | 0 | 0   | 0 | 0 |  |  |
|                                                                                                                                                                                                                          | 0 | 0 | 0 | 0 | 0 | 0 | 0 | 0 | 0  | 0 | 0 | 0 | 0 | 0 | 24 | 0 | 0 | 0 | 0 | 0 | 0 | 0 | 0 | 0   | 0 | 0 |  |  |
|                                                                                                                                                                                                                          | 0 | 0 | 0 | 0 | 0 | 0 | 0 | 0 | 0  | 0 | 0 | 0 | 0 | 0 | 0  | 0 | 0 | 0 | 0 | 0 | 0 | 0 | 0 | 0   | 0 | 0 |  |  |
|                                                                                                                                                                                                                          | 0 | 0 | 0 | 0 | 0 | 0 | 0 | 0 | 0  | 0 | 0 | 0 | 0 | 0 | 0  | 0 | 0 | 0 | 0 | 0 | 0 | 0 | 0 | 0   | 0 | 0 |  |  |
| M02255_77_000000000-ADUT3_1_1110_12416_11681 T---AC--GT-AG-GGG-----ACA-A-G----C--G--T---T-GT-C-CGG-AA-----TG-A--C-T--GG-GC-----GT--A----AA-GG-GC-GC-----G-TA-G-G-C-G-----G--T-CT-A-T-T-----                              |   |   |   |   |   |   |   |   |    |   |   |   |   |   |    |   |   |   |   |   |   |   |   |     |   |   |  |  |
| -----AA---G-T-C-T-----G-A-T--G--TG--A-AA-GG--T-A-CC-G-G----CT-C-AA-----C-C-G-G-T-G-A--A-G---T-G--C-A--T-T-----G--GA-A-A--C-----T-G-G--TA--G-A-C---T-T-G-A-G-T--A--T-TG-----GA-G-A-----G-G-C-A--AG-T-----GG--A--ATT----   |   |   |   |   |   |   |   |   |    |   |   |   |   |   |    |   |   |   |   |   |   |   |   |     |   |   |  |  |
| C-C-T-A-GT--GT-A-G-CG-GT--G---A--A-A--TG-C-GT-AG--AT-A-TT--A-G--G-A-G-G-A-AC-A-CC--AG--T--G--GC-GAA-G--G-C-G-----G--C-T-T-G---CTG--G--AC-A-A-----A-T--A-C-T--GA--CG-C-T-G--A-GG--T-G-CG-A--AA-G-C---G-TG--               |   |   |   |   |   |   |   |   |    |   |   |   |   |   |    |   |   |   |   |   |   |   |   |     |   |   |  |  |
| GG-G--AG-C-G-AA-----CA--GG Bacteria(100);Firmicutes(100);Clostridia(100);Clostridiales(100);Eubacteriaceae(100);Eubacterium(100);unclassified(100);unclassified(100);unclassified(100);                                  |   |   |   |   |   |   |   |   |    |   |   |   |   |   |    |   |   |   |   |   |   |   |   |     |   |   |  |  |
| Otu0841                                                                                                                                                                                                                  | 0 | 0 | 0 | 0 | 0 | 0 | 0 | 0 | 0  | 0 | 0 | 0 | 0 | 0 | 0  | 0 | 2 | 0 | 0 | 0 | 0 | 0 | 0 | 0   | 0 | 0 |  |  |
|                                                                                                                                                                                                                          | 0 | 0 | 0 | 0 | 0 | 0 | 0 | 0 | 0  | 0 | 0 | 0 | 0 | 0 | 0  | 0 | 0 | 0 | 0 | 0 | 0 | 0 | 0 | 0   | 0 | 0 |  |  |
|                                                                                                                                                                                                                          | 0 | 0 | 0 | 0 | 0 | 0 | 0 | 0 | 0  | 0 | 0 | 0 | 0 | 0 | 0  | 0 | 0 | 0 | 0 | 0 | 0 | 0 | 0 | 0   | 0 | 0 |  |  |
|                                                                                                                                                                                                                          | 0 | 0 | 0 | 0 | 0 | 0 | 0 | 0 | 0  | 0 | 0 | 0 | 0 | 0 | 0  | 0 | 0 | 0 | 0 | 0 | 0 | 0 | 0 | 0   | 0 | 0 |  |  |
| M02255_76_000000000-ADUNE_1_1110_24335_9534 C---GG---CT-AA-TTC-----CGT-G-C-----C--A--G---C--AG-C-CGC-GG-----TA-A-T-A--CG-GA-----AG--G---TC-CA-G--GC-----G-TT-A-T-C-C-----G--G-GG-A-T-T-----TA-----                       |   |   |   |   |   |   |   |   |    |   |   |   |   |   |    |   |   |   |   |   |   |   |   |     |   |   |  |  |
| -G-T-G-T-----G-T-T--G--TG--A-AA-TG--T-A-GA-C-G----CT-C-AA-----C-G-T-C-T-G-A--C-T---T-G--C-A--G--C-----G--CA-T-A--C-----T--G-G--TT--C-C-C---T-T-G-A-G-T--A--C-GC---AC-A-A-----C-G-T-C--GG-C-----GG--A--ATT---C-G-T-C-GT-- |   |   |   |   |   |   |   |   |    |   |   |   |   |   |    |   |   |   |   |   |   |   |   |     |   |   |  |  |
| GT-A-G-CG-GT--G---A--A-A--TG-C-TT-AG--AT-A-TG--A-C--G-A-A-G-A-AC-T-CC--AA--T-T--GC-GAA-G--G-C-A-----G--C-T-G-A--CGG--G--GG-C-G-----C-A--A-C-T--GA--CG-C-T-T--A-AG--C-T-CG-A--AG-G-T--G-CG--GG-T--AT-C-G-                 |   |   |   |   |   |   |   |   |    |   |   |   |   |   |    |   |   |   |   |   |   |   |   |     |   |   |  |  |
| AA-----CA--GG Bacteria(100);Bacteroidetes(100);Bacteroidia(100);Bacteroidales(100);Prevotellaceae(100);Prevotella(100);unclassified(100);unclassified(100);unclassified(100);                                            |   |   |   |   |   |   |   |   |    |   |   |   |   |   |    |   |   |   |   |   |   |   |   |     |   |   |  |  |
| Otu0842                                                                                                                                                                                                                  | 0 | 0 | 0 | 0 | 0 | 0 | 0 | 0 | 0  | 0 | 0 | 0 | 0 | 0 | 0  | 0 | 0 | 0 | 0 | 0 | 0 | 0 | 0 | 0   | 0 | 0 |  |  |
|                                                                                                                                                                                                                          | 0 | 0 | 0 | 0 | 0 | 0 | 0 | 0 | 0  | 0 | 0 | 0 | 0 | 0 | 0  | 0 | 0 | 0 | 0 | 0 | 0 | 0 | 0 | 0   | 0 | 0 |  |  |
|                                                                                                                                                                                                                          | 0 | 0 | 0 | 0 | 0 | 0 | 0 | 0 | 0  | 0 | 0 | 0 | 0 | 0 | 0  | 0 | 0 | 0 | 0 | 0 | 0 | 0 | 0 | 681 | 0 | 0 |  |  |
|                                                                                                                                                                                                                          | 0 | 0 | 0 | 0 | 0 | 0 | 0 | 0 | 38 | 1 | 0 | 0 | 0 | 0 | 0  | 0 | 0 | 0 | 0 | 0 | 0 | 0 | 0 | 0   | 0 | 0 |  |  |
| M02255_77_000000000-ADUT3_1_1105_23085_17063 T---AC--GT-AG-GGG-----GCA-A-G----C--G--T---T-GT-C-CGG-AA-----TC-A--C-T--GG-GC-----GT--A----AA-GG-GT-TC-----G-CA-G-G-C-G-----G--A-AA-T-G-C-----                              |   |   |   |   |   |   |   |   |    |   |   |   |   |   |    |   |   |   |   |   |   |   |   |     |   |   |  |  |
| -----AA---G-T-C-A-----G-T-T--G--TG--A-AA-GG--C-A-GA-G-G----CT-C-AA-----C-C-T-C-T-G-T--A-----A-G--C-A--A-T-----T--GA-A-A--C-----T--G-T--AT--T-T-C---T-T-G-A-G-A--T--G-TG-----GA-G-A-----G-G-C-A--AG-T-----GG--A--ATT---C- |   |   |   |   |   |   |   |   |    |   |   |   |   |   |    |   |   |   |   |   |   |   |   |     |   |   |  |  |
| C-T-A-GT--GT-A-G-CG-GT--G---A--A-A--TG-C-GT-AG--AT-A-TT--A-G--G-A-A-G-A-AT-A-CC--GG--T--G--GC-GAA-G--G-C-G-----A--C-T-T-G---CTG--G--AC-A-C-----A-A--A-C-T--GA--CG-C-T-G--A-GG--A-A-CG-A--AA-G-C---G-TG--GG-T--           |   |   |   |   |   |   |   |   |    |   |   |   |   |   |    |   |   |   |   |   |   |   |   |     |   |   |  |  |
| -AG-C-A-AA-----CA--GG Bacteria(100);Firmicutes(100);Clostridia(100);Clostridiales(100);Family_XI_Incertae_Sedis(100);Peptoniphilus(100);unclassified(100);unclassified(100);unclassified(100);                           |   |   |   |   |   |   |   |   |    |   |   |   |   |   |    |   |   |   |   |   |   |   |   |     |   |   |  |  |
| Otu0843                                                                                                                                                                                                                  | 0 | 0 | 0 | 0 | 0 | 0 | 0 | 0 | 0  | 0 | 0 | 0 | 0 | 0 | 0  | 0 | 0 | 0 | 0 | 0 | 0 | 0 | 0 | 0   | 0 | 0 |  |  |
|                                                                                                                                                                                                                          | 0 | 0 | 0 | 0 | 0 | 0 | 0 | 0 | 0  | 0 | 0 | 0 | 0 | 0 | 51 | 0 | 0 | 0 | 0 | 0 | 0 | 0 | 0 | 0   | 0 | 0 |  |  |
|                                                                                                                                                                                                                          | 0 | 0 | 0 | 0 | 0 | 0 | 0 | 0 | 0  | 0 | 0 | 0 | 0 | 0 | 0  | 0 | 0 | 0 | 0 | 0 | 0 | 0 | 0 | 0   | 0 | 0 |  |  |
|                                                                                                                                                                                                                          | 0 | 0 | 0 | 0 | 0 | 0 | 0 | 0 | 0  | 0 | 0 | 0 | 0 | 0 | 0  | 0 | 0 | 0 | 0 | 0 | 0 | 0 | 0 | 0   | 0 | 0 |  |  |
| M02255_77_000000000-ADUT3_1_1104_22614_17422 T---AC--GT-AG-GTG-----G                                                                                                                                                     |   |   |   |   |   |   |   |   |    |   |   |   |   |   |    |   |   |   |   |   |   |   |   |     |   |   |  |  |



|                                                                                                                                                                                                                             |   |   |   |   |   |   |   |   |    |   |   |   |    |   |   |   |   |   |   |   |   |   |   |   |   |   |   |
|-----------------------------------------------------------------------------------------------------------------------------------------------------------------------------------------------------------------------------|---|---|---|---|---|---|---|---|----|---|---|---|----|---|---|---|---|---|---|---|---|---|---|---|---|---|---|
| Otu0845                                                                                                                                                                                                                     | 0 | 0 | 0 | 0 | 0 | 0 | 0 | 0 | 0  | 0 | 0 | 0 | 0  | 0 | 0 | 0 | 0 | 0 | 0 | 0 | 6 | 0 | 0 | 0 | 0 | 0 | 0 |
|                                                                                                                                                                                                                             | 0 | 2 | 0 | 0 | 0 | 0 | 0 | 0 | 17 | 1 | 0 | 0 | 0  | 0 | 0 | 0 | 0 | 0 | 0 | 0 | 0 | 0 | 0 | 0 | 0 | 0 |   |
|                                                                                                                                                                                                                             | 0 | 0 | 0 | 0 | 0 | 0 | 0 | 0 | 0  | 0 | 0 | 0 | 0  | 0 | 0 | 0 | 0 | 0 | 0 | 0 | 0 | 0 | 0 | 0 | 0 | 0 |   |
|                                                                                                                                                                                                                             | 0 | 0 | 0 | 0 | 0 | 0 | 0 | 0 | 0  | 0 | 0 | 0 | 0  | 0 | 0 | 0 | 0 | 0 | 0 | 0 | 0 | 0 | 0 | 0 | 0 |   |   |
| M02255_77_000000000-ADUT3_1_2117_9410_16626 T---AC---GA-AG-GGG-----GCT-A-G-----C--G--T---T--GT-T-CGG-AA-----TT-A--C-T--GG-GC-----GT--A----AA-GC-GC-AC-----G-TA-G-G-C-G-----G--G-TT-T-G-T-----AA--                           |   |   |   |   |   |   |   |   |    |   |   |   |    |   |   |   |   |   |   |   |   |   |   |   |   |   |   |
| ---G-T-A-A-----G-G-G--G--TG--A-AA-TC--C-C-AG-G-G-----CT-C-AA-----C-C-C-T-G-G-A--A-C---T-G--C-C---T--C-----T--TA-G-A--C-----T--G-C--AA--G-C-C---T-G-G-A-G-G--T---C-AG-----GA-G-A-----G-G-C-G--AG-T-----GG--A--ATT---C-C-G-A- |   |   |   |   |   |   |   |   |    |   |   |   |    |   |   |   |   |   |   |   |   |   |   |   |   |   |   |
| GT--GT-A-G-AG-GT--G---A--A-A---TT-C-GT-AG--AT-A-TT--C-G--G-A-G-G-A-AC-A-CC---AG--T--G--GC-GAA-G--G-C--G-----A--C-T-C-G---CTG--G--AC-T-G-----A-T---A-C-T--GA--CG-C-T-G--A-GG--T-G-CG-A--AA-G-C---G-TG--GG-G--AG-             |   |   |   |   |   |   |   |   |    |   |   |   |    |   |   |   |   |   |   |   |   |   |   |   |   |   |   |
| C-A-AA-----CA--GG    Bacteria(100);Proteobacteria(100);Alphaproteobacteria(100);unclassified(100);unclassified(100);unclassified(100);unclassified(100);unclassified(100);unclassified(100);                                |   |   |   |   |   |   |   |   |    |   |   |   |    |   |   |   |   |   |   |   |   |   |   |   |   |   |   |
| Otu0846                                                                                                                                                                                                                     | 0 | 0 | 0 | 0 | 0 | 0 | 0 | 0 | 0  | 0 | 0 | 0 | 0  | 0 | 0 | 0 | 0 | 0 | 0 | 0 | 0 | 0 | 0 | 0 | 0 | 0 |   |
|                                                                                                                                                                                                                             | 0 | 0 | 0 | 0 | 0 | 0 | 0 | 0 | 0  | 0 | 0 | 0 | 18 | 0 | 0 | 0 | 0 | 0 | 0 | 0 | 0 | 0 | 0 | 0 | 0 | 0 |   |
|                                                                                                                                                                                                                             | 0 | 0 | 0 | 0 | 0 | 0 | 0 | 0 | 0  | 0 | 0 | 0 | 0  | 0 | 0 | 0 | 0 | 0 | 0 | 0 | 0 | 0 | 0 | 0 | 0 | 0 |   |
|                                                                                                                                                                                                                             | 0 | 0 | 0 | 0 | 0 | 0 | 0 | 0 | 0  | 0 | 0 | 0 | 0  | 0 | 0 | 0 | 0 | 0 | 0 | 0 | 0 | 0 | 0 | 0 | 0 |   |   |
| M02255_77_000000000-ADUT3_1_1115_13208_20472            T---AC---GT-AT-GGG-----GCA-A-G-----C--G--T---T--GT-C-CGG-AA-----TT-A--T-T--GG-GC-----GT--A----AA-GG-GT-AC-----G-TA-G-G-C-G-----G--T-TA-A-T-T-----                   |   |   |   |   |   |   |   |   |    |   |   |   |    |   |   |   |   |   |   |   |   |   |   |   |   |   |   |
| ----AA---G-T-C-T-----G-A-A--T--TA--A-AA-GG--C-T-GT-G-G-----CT-C-AA-----C-C-A-T-G-G-T-A-----A-G--G-T---T--T-----A-GA-T-A--C-----T--G-G--TT--A-A-C---T-T-G-A-G-T-A--G-AT----GA-G-G-----G-G-A-A--AG-T-----GG--A--ATT---C-      |   |   |   |   |   |   |   |   |    |   |   |   |    |   |   |   |   |   |   |   |   |   |   |   |   |   |   |
| C-A-T-GT--GT-A-G-CG-GT--G---A--A-A---TG-C-GT-AG--AT-A-TA--T-G--G-A-G-G-A-AC-A-CC---TG--T--G--GC-GAA-G--G-C--G-----A--C-T-T-T---CTA--G--AA-T-C-----T-A--A-C-T--GA--CG-C-T-G--A-GG--T-A-CG-A--AG-G-C---G-TG--GG-G-            |   |   |   |   |   |   |   |   |    |   |   |   |    |   |   |   |   |   |   |   |   |   |   |   |   |   |   |
| -AG-C-A-AA-----CA--GG    Bacteria(100);Firmicutes(100);Clostridia(100);Clostridiales(100);Family_XI_Incertae_Sedis(100);Helcococcus(100);unclassified(100);unclassified(100);unclassified(100);                             |   |   |   |   |   |   |   |   |    |   |   |   |    |   |   |   |   |   |   |   |   |   |   |   |   |   |   |
| Otu0847                                                                                                                                                                                                                     | 0 | 0 | 0 | 0 | 0 | 0 | 0 | 0 | 0  | 0 | 0 | 0 | 0  | 0 | 0 | 0 | 0 | 0 | 0 | 0 | 4 | 0 | 0 | 0 | 0 | 0 |   |
|                                                                                                                                                                                                                             | 0 | 4 | 0 | 0 | 0 | 0 | 0 | 0 | 18 | 1 | 0 | 0 | 0  | 0 | 0 | 0 | 0 | 0 | 0 | 0 | 0 | 0 | 0 | 0 | 0 | 0 |   |
|                                                                                                                                                                                                                             | 0 | 0 | 0 | 0 | 0 | 0 | 0 | 0 | 0  | 0 | 0 | 0 | 0  | 0 | 0 | 9 | 0 | 0 | 0 | 0 | 0 | 0 | 0 | 0 | 0 | 0 |   |
|                                                                                                                                                                                                                             | 0 | 0 | 0 | 0 | 0 | 0 | 0 | 0 | 0  | 0 | 0 | 0 | 0  | 0 | 0 | 0 | 0 | 0 | 0 | 0 | 0 | 0 | 0 | 0 | 0 |   |   |
| M02255_76_000000000-ADUNE_1_2110_15964_8041 C---CG---GC-TA-ACT-----CCG-T-G-----C--C--A---G--CA-G-CCG-CG-----GT-A--A-T--AC-GG-----AG--G---GT-GC-AA-GC-----G-TT-GTT-C-G-----G--T-TT-C-T-T-----AA--                            |   |   |   |   |   |   |   |   |    |   |   |   |    |   |   |   |   |   |   |   |   |   |   |   |   |   |   |
| --G-T-C-T-----G-A-T--G--TG--A-AA-GC--C-C-TG-G-G-----CT-C-AA-----C-C-C-A-G-G-A--A-G---T-G--C-A--T--T-----G--GA-T-A--C-----T--G-G--GA--G-A-C---T-T-G-A-A-T-A--C-GG-----GA-G-A-----G-G-G-T---AG-T-----GG--A--ATT---C-C-T-A-    |   |   |   |   |   |   |   |   |    |   |   |   |    |   |   |   |   |   |   |   |   |   |   |   |   |   |   |
| GT--GT-A-G-GA-GT--G---A--A-A---TC-C-GT-AG--AT-A-TT--A-G--G-A-G-G-A-AC-A-CC---GG--T--G--GC-GAA-G--G-C--G-----G--C-T-A-C---CTG--G--AC-C-G-----A-T---A-T-T--GA--CG-C-T-G--A-GA--C-G-CG-A--AA-G-C---G-TG--GG-G--AG-             |   |   |   |   |   |   |   |   |    |   |   |   |    |   |   |   |   |   |   |   |   |   |   |   |   |   |   |
| C-A-AA-----CA--GG    Bacteria(100);Proteobacteria(100);Deltaproteobacteria(100);Desulfuromonadales(100);Geobacteraceae(100);Geobacter(100);unclassified(100);unclassified(100);unclassified(100);                           |   |   |   |   |   |   |   |   |    |   |   |   |    |   |   |   |   |   |   |   |   |   |   |   |   |   |   |
| Otu0848                                                                                                                                                                                                                     | 0 | 0 | 0 | 0 | 0 | 0 | 0 | 0 | 0  | 0 | 0 | 0 | 0  | 0 | 0 | 0 | 0 | 0 | 0 | 0 | 0 | 0 | 0 | 0 | 0 | 0 |   |
|                                                                                                                                                                                                                             | 0 | 0 | 0 | 0 | 0 | 0 | 0 | 0 | 0  | 0 | 0 | 0 | 18 | 0 | 0 | 0 | 0 | 0 | 0 | 0 | 0 | 0 | 0 | 0 | 0 | 0 |   |
|                                                                                                                                                                                                                             | 0 | 0 | 0 | 0 | 0 | 0 | 0 | 0 | 0  | 0 | 0 | 0 | 0  | 0 | 0 | 0 | 0 | 0 | 0 | 0 | 0 | 0 | 0 | 0 | 0 | 0 |   |
|                                                                                                                                                                                                                             | 0 | 0 | 0 | 0 | 0 | 0 | 0 | 0 | 0  | 0 | 0 | 0 | 0  | 0 | 0 | 0 | 0 | 0 | 0 | 0 | 0 | 0 | 0 | 0 | 0 |   |   |
| M02255_77_000000000-ADUT3_1_1113_19557_19577            T---AC---GT-AG-GTG-----GCA-A-G-----C--G--T---T--AT-C-CGG-AT-----TT-A--C-T--GG-GT-----GT--A----AA-GG-GC-GT-----G-TA-G-A-C-G-----G--G-TT-T-G-A-----                   |   |   |   |   |   |   |   |   |    |   |   |   |    |   |   |   |   |   |   |   |   |   |   |   |   |   |   |
| ----AA---G-T-C-A-----G-G-C--G--TG--A-AA-TA--C-C-GC-A-G-----CT-T-AA-----C-T-G-C-G-G-G--G-C---T-G--C-G---C--T-----T--GA-A-A--C-----T--T-C-AA--A-T-C---T-T-G-A-G-T--G---C-TG-----GA-G-A-----G-G-A-A--AG-C-----GG--A--ATT---C-  |   |   |   |   |   |   |   |   |    |   |   |   |    |   |   |   |   |   |   |   |   |   |   |   |   |   |   |
| C-T-A-GT--GT-A-G-CG-GT--G---A--A-A---TG-C-GT-AG--AT-A-TT--A-G--G-A-G-G-A-AC-A-CC---AG--T--G--GC-GAA-G--G-C--G-----G--C-T-T-T---CTG--G--AC-A-G-----T-A---A-C-T--GA--CG-T-T-G--A-GG--C-G-CG-A--AA-G-T---G-TG--GG-G-           |   |   |   |   |   |   |   |   |    |   |   |   |    |   |   |   |   |   |   |   |   |   |   |   |   |   |   |
| -AG-C-A-AA-----CA--GG    Bacteria(100);Firmicutes(100);Clostridia(100);Clostridiales(100);unclassified(100);unclassified(100);unclassified(100);unclassified(100);unclassified(100);                                        |   |   |   |   |   |   |   |   |    |   |   |   |    |   |   |   |   |   |   |   |   |   |   |   |   |   |   |
| Otu0849                                                                                                                                                                                                                     | 0 | 0 | 0 | 0 | 0 | 0 | 0 | 0 | 0  | 0 | 0 | 0 | 0  | 0 | 0 | 0 | 0 | 0 | 0 | 0 | 0 | 0 | 0 | 0 | 0 | 0 |   |
|                                                                                                                                                                                                                             | 0 | 0 | 0 | 0 | 0 | 0 | 0 | 0 | 0  | 0 | 0 | 0 | 19 | 0 | 0 | 0 | 0 | 0 | 0 | 0 | 0 | 0 | 0 | 0 | 0 | 0 |   |
|                                                                                                                                                                                                                             | 0 | 0 | 0 | 0 | 0 | 0 | 0 | 0 | 0  | 0 | 0 | 0 | 0  | 0 | 0 | 0 | 0 | 0 | 0 | 0 | 0 | 0 | 0 | 0 | 0 | 0 |   |
|                                                                                                                                                                                                                             | 0 | 0 | 0 | 0 | 0 | 0 | 0 | 0 | 0  | 0 | 0 | 0 | 0  | 0 | 0 | 0 | 0 | 0 | 0 | 0 | 0 | 0 | 0 | 0 | 0 |   |   |
| M02255_77_000000000-ADUT3_1_1112_8165_7019    T---AC---GT-AG-GGG-----GCA-A-G-----C--G--T---T--AT-C-CGG-AT-----TT-A--C-T--GG-GT-----GT--A----AA-GG-GA-GC-----G-TA-G-A-C-G-----G--T-TA-A-T-C-----AA-                          |   |   |   |   |   |   |   |   |    |   |   |   |    |   |   |   |   |   |   |   |   |   |   |   |   |   |   |
| ---G-T-C-A-----G-A-T--G--TG--A-AA-GC--C-C-GG-G-G-----CT-T-AA-----C-C-G-C-G-G-G--A-C---T-G--C-A--T--T-----T--GA-A-A--C-----T--G-G--AG--A-A-C---T-G-G-A-G-T--G---T-CG-----GA-G-A-----G-G-T-A--AG-C-----GG--A--ATT---C-C-T-A-  |   |   |   |   |   |   |   |   |    |   |   |   |    |   |   |   |   |   |   |   |   |   |   |   |   |   |   |
| GT--GT-A-G-CG-GT--G---A--A-A---TG-C-GT-AG--AT-A-TT--A-G--G-A-G-G-A-AC-A-CC---AG--T--G--GC-GAA-G--G-C--G-----G--C-T-T-A---CTG--G--AC-G-A-----T-G---A-C-T--GA--CG-T-T-G--A-GG--C-T-CG-A--AA-G-C---G-TG--GG-G--AG-             |   |   |   |   |   |   |   |   |    |   |   |   |    |   |   |   |   |   |   |   |   |   |   |   |   |   |   |
| C-A-AA-----CA--GG    Bacteria(100);Firmicutes(100);Clostridia(100);Clostridiales(100);Lachnospiraceae(100);unclassified(100);unclassified(100);unclassified(100);unclassified(100);                                         |   |   |   |   |   |   |   |   |    |   |   |   |    |   |   |   |   |   |   |   |   |   |   |   |   |   |   |



|         |                                                                                                                                                                                                                                                                                                                                                                                                                                                                                                                                                                                                                                                                                                                                                                                                    |    |   |   |     |   |   |    |    |     |    |   |    |    |   |    |   |   |   |   |    |   |   |   |   |   |   |  |
|---------|----------------------------------------------------------------------------------------------------------------------------------------------------------------------------------------------------------------------------------------------------------------------------------------------------------------------------------------------------------------------------------------------------------------------------------------------------------------------------------------------------------------------------------------------------------------------------------------------------------------------------------------------------------------------------------------------------------------------------------------------------------------------------------------------------|----|---|---|-----|---|---|----|----|-----|----|---|----|----|---|----|---|---|---|---|----|---|---|---|---|---|---|--|
| Otu0850 | 0                                                                                                                                                                                                                                                                                                                                                                                                                                                                                                                                                                                                                                                                                                                                                                                                  | 0  | 0 | 0 | 0   | 0 | 0 | 0  | 0  | 0   | 0  | 0 | 0  | 0  | 0 | 0  | 0 | 0 | 0 | 0 | 6  | 0 | 0 | 0 | 0 | 0 | 0 |  |
|         | 0                                                                                                                                                                                                                                                                                                                                                                                                                                                                                                                                                                                                                                                                                                                                                                                                  | 0  | 0 | 0 | 0   | 0 | 0 | 0  | 20 | 0   | 44 | 0 | 0  | 0  | 0 | 89 | 0 | 0 | 0 | 0 | 0  | 0 | 0 | 0 | 0 | 0 | 0 |  |
|         | 34                                                                                                                                                                                                                                                                                                                                                                                                                                                                                                                                                                                                                                                                                                                                                                                                 | 45 | 0 | 0 | 0   | 1 | 0 | 0  | 0  | 1   | 26 | 0 | 0  | 59 | 0 | 0  | 0 | 0 | 0 | 0 | 0  | 0 | 0 | 0 | 0 | 0 | 0 |  |
|         | 0                                                                                                                                                                                                                                                                                                                                                                                                                                                                                                                                                                                                                                                                                                                                                                                                  | 0  | 0 | 0 | 160 | 0 | 0 | 23 | 0  | 173 | 0  | 4 | 0  | 0  | 0 | 0  | 0 | 0 | 0 | 0 | 0  | 0 | 0 | 0 | 0 | 0 | 0 |  |
|         | M02255_76_000000000-ADUNE_1_2111_24374_12348 T---AC---GT-AG-GGG-----GCG-A-A---C-G-T---T-AT-C-CGG-AA-----TG-A-T-T-GG-GC-----GT--A---AA-GG-GT-AC-----G-TA-G-G-C-G-----G-C-GC-T-T-T-----AA---G-T-C-A-----G-G-T-G--TG--A-AA-GG--C-A-TG-G-G---CT-C-AA-----C-C-C-A-T-G-T-A---A-G-C-A--C-T-----T-GA-A-A--C-----T-G-G-AG--C-G-C---T-T-G-A-G-G-G--A-AG---GA-G-A-----G-G-A-A--AG-T----GG-A--ATT---C-C-T-A-GT--GT-A-G-CG-GT--G---A-A-A---TG-C-GT-AG--AT-A-TT--A-G--G-A-G-G-A-AT-A-CC--GG--T-G--GC-GAA-G-G-C-G-----A-C-T-T-T--CTG--G--AC-T-T-----T-T---T-C-T--GA--CG-C-T-G--A-GG--T-A-CG-A-AA-G-C---G-TG--GG-G--AG-C-A-AA-----CA--GG Bacteria(100);Firmicutes(100);Clostridia(100);Clostridiales(100);Family_XI_Incertae_Sedis(100);uncultured(100);unclassified(100);unclassified(100);unclassified(100);     |    |   |   |     |   |   |    |    |     |    |   |    |    |   |    |   |   |   |   |    |   |   |   |   |   |   |  |
| Otu0851 | 0                                                                                                                                                                                                                                                                                                                                                                                                                                                                                                                                                                                                                                                                                                                                                                                                  | 0  | 0 | 0 | 0   | 0 | 0 | 0  | 0  | 0   | 0  | 0 | 0  | 0  | 0 | 0  | 0 | 0 | 0 | 0 | 0  | 0 | 0 | 0 | 0 | 0 | 0 |  |
|         | 0                                                                                                                                                                                                                                                                                                                                                                                                                                                                                                                                                                                                                                                                                                                                                                                                  | 0  | 0 | 0 | 0   | 0 | 0 | 0  | 0  | 0   | 0  | 0 | 42 | 0  | 0 | 0  | 0 | 0 | 0 | 0 | 0  | 0 | 0 | 0 | 0 | 0 | 0 |  |
|         | 0                                                                                                                                                                                                                                                                                                                                                                                                                                                                                                                                                                                                                                                                                                                                                                                                  | 0  | 0 | 0 | 0   | 0 | 0 | 0  | 0  | 0   | 0  | 0 | 0  | 0  | 0 | 0  | 0 | 0 | 0 | 0 | 0  | 0 | 0 | 0 | 0 | 0 | 0 |  |
|         | 0                                                                                                                                                                                                                                                                                                                                                                                                                                                                                                                                                                                                                                                                                                                                                                                                  | 0  | 0 | 0 | 0   | 0 | 0 | 0  | 0  | 0   | 0  | 0 | 0  | 0  | 0 | 0  | 0 | 0 | 0 | 0 | 0  | 0 | 0 | 0 | 0 | 0 | 0 |  |
|         | M02255_77_000000000-ADUT3_1_1110_24589_5811 T---AC---AG-AG-GTC-----TCA-A-G---C-G-T---T-GT-T-CGG-AT-----TT-A--C-T-GG-GC-----GT--A---AA-GG-GT-GC-----G-TA-G-G-C-G-----G--C-GG-C-G-T-----AA---G-T-C-G-----A-G-T-G--TG--A-AA-TC--T-T-CC-G-G---CT-C-AA-----C-C-G-G-A-A-A--A-T---T-G--C-A--C-T-----T-GA-T-A--C-----T-G-T-GT--C-G-C---T-A-G-A-G-G-A--C-TG---TA-G-A-----G-G-A-G--AC-T----GG-A--ATT---C-A-C-G-GT--GT-A-G-CA-GT--G---A-A-A---TG-C-GT-AG--AT-A-TC--G-T--G-A-G-G-A-AG-A-CC--GG--T-G--GC-GAA-A-G-C-G-----A-G-T-C-T--CTG--G--GC-A-G-----T-T---C-C-T--GA--CG-C-T-G--A-GG--C-A-CG-A--AG-G-C---T-AG--GG-G--AG-C-A-AA-----CG--GG Bacteria(100);Verrucomicrobia(100);Spartobacteria(100);unclassified(100);unclassified(100);unclassified(100);unclassified(100);unclassified(100);unclassified(100); |    |   |   |     |   |   |    |    |     |    |   |    |    |   |    |   |   |   |   |    |   |   |   |   |   |   |  |
| Otu0852 | 0                                                                                                                                                                                                                                                                                                                                                                                                                                                                                                                                                                                                                                                                                                                                                                                                  | 0  | 0 | 0 | 0   | 0 | 0 | 0  | 0  | 0   | 0  | 0 | 0  | 0  | 0 | 0  | 0 | 0 | 0 | 0 | 13 | 1 | 0 | 0 | 0 | 0 | 0 |  |
|         | 0                                                                                                                                                                                                                                                                                                                                                                                                                                                                                                                                                                                                                                                                                                                                                                                                  | 0  | 0 | 1 | 0   | 0 | 0 | 0  | 23 | 3   | 0  | 0 | 0  | 0  | 0 | 0  | 0 | 0 | 0 | 0 | 0  | 0 | 0 | 0 | 0 | 0 | 0 |  |
|         | 0                                                                                                                                                                                                                                                                                                                                                                                                                                                                                                                                                                                                                                                                                                                                                                                                  | 0  | 0 | 0 | 0   | 0 | 0 | 0  | 0  | 0   | 0  | 0 | 0  | 0  | 0 | 0  | 0 | 0 | 0 | 0 | 0  | 0 | 0 | 0 | 0 | 0 | 0 |  |
|         | 0                                                                                                                                                                                                                                                                                                                                                                                                                                                                                                                                                                                                                                                                                                                                                                                                  | 0  | 0 | 0 | 0   | 0 | 0 | 0  | 0  | 0   | 0  | 0 | 0  | 0  | 0 | 0  | 0 | 0 | 0 | 0 | 0  | 0 | 0 | 0 | 0 | 0 | 0 |  |
|         | M02255_77_000000000-ADUT3_1_1107_26294_10594 T---AC---GT-AG-GGG-----GCA-A-G---C-G-T---T-AT-C-CGG-AT-----TT-A--C-T-GG-GT-----GT--A---AA-GG-GA-GC-----G-TA-G-G-T-G-----G--C-TC-G-A-T-----AA---G-T-C-A-----G-A-A-G--TG--A-AA-GC--C-C-AA-G-G---CT-C-AA-----C-C-T-T-G-G-G--A-C---T-G--C-T--T-T-----T-GA-A-A--C-----T-A-T-CG--G-G-C---T-A-G-A-G-T-G--C-AG---GA-G-A-----G-G-T-A--AG-T----GG-A--ATT---C-T-A-GT--GT-A-G-CG-GT--G---A-A-A---TG-C-GT-AG--AT-A-TT--A-G--G-A-G-G-A-AC-A-CC--AG--T-G--GC-GAA-G-G-C-G-----A-C-T-T-A--CTG--G--AC-T-G-----T-A--A-C-T--GA--CA-C-T-G--A-GG--C-T-CG-A--AA-G-C---G-TG--GG-G--AG-C-A-AA-----CA--GG Bacteria(100);Firmicutes(100);Clostridia(100);Clostridiales(100);Lachnospiraceae(100);unclassified(100);unclassified(100);unclassified(100);unclassified(100);        |    |   |   |     |   |   |    |    |     |    |   |    |    |   |    |   |   |   |   |    |   |   |   |   |   |   |  |
| Otu0853 | 0                                                                                                                                                                                                                                                                                                                                                                                                                                                                                                                                                                                                                                                                                                                                                                                                  | 0  | 0 | 0 | 0   | 0 | 0 | 0  | 0  | 0   | 0  | 0 | 0  | 0  | 0 | 0  | 0 | 0 | 0 | 0 | 0  | 0 | 0 | 0 | 0 | 0 | 0 |  |
|         | 0                                                                                                                                                                                                                                                                                                                                                                                                                                                                                                                                                                                                                                                                                                                                                                                                  | 0  | 0 | 0 | 0   | 0 | 0 | 0  | 0  | 0   | 0  | 0 | 31 | 0  | 0 | 0  | 0 | 0 | 0 | 0 | 0  | 0 | 0 | 0 | 0 | 0 | 0 |  |
|         | 0                                                                                                                                                                                                                                                                                                                                                                                                                                                                                                                                                                                                                                                                                                                                                                                                  | 0  | 0 | 0 | 0   | 0 | 0 | 0  | 0  | 0   | 0  | 0 | 0  | 0  | 0 | 0  | 0 | 0 | 0 | 0 | 0  | 0 | 0 | 0 | 0 | 0 | 0 |  |
|         | 0                                                                                                                                                                                                                                                                                                                                                                                                                                                                                                                                                                                                                                                                                                                                                                                                  | 0  | 0 | 0 | 0   | 0 | 0 | 0  | 0  | 0   | 0  | 0 | 0  | 0  | 0 | 0  | 0 | 0 | 0 | 0 | 0  | 0 | 0 | 0 | 0 | 0 | 0 |  |
|         | M02255_77_000000000-ADUT3_1_1108_7814_4546 T---AC---GT-AG-GTG-----GCA-A-G---C-G-T---T-GT-C-CGG-AA-----TT-A--C-T-GG-GT-----GT--A---AA-GG-GA-GC-----G-CA-G                                                                                                                                                                                                                                                                                                                                                                                                                                                                                                                                                                                                                                           |    |   |   |     |   |   |    |    |     |    |   |    |    |   |    |   |   |   |   |    |   |   |   |   |   |   |  |



Otu0855 0 0 0 0 0 0 0 0 0 0 0 0 0 0 0 0 0 0 0 0 0 0 0 0 0 0 0 0 0 0  
0 0 0 0 0 0 0 0 0 0 0 0 0 30 0 0 0 0 0 0 0 0 0 0 0 0 0 0 0  
0 0 0 0 0 0 0 0 0 0 0 0 0 0 0 0 0 0 0 0 0 0 0 0 0 0 0 0 0 0  
0 0 0 0 0 0 0 0 0 0 0 0 0 0 0 0 0 0 0 0 0 0 0 0 0 0 0 0 0 0  
M02255\_77\_000000000-ADUT3\_1\_1105\_17302\_23191 T---AC---GT-AG-GGG-----GCA-A-G-----C-G-T---T--GT-C-CGG-AA-----TG-A--T-T--GG-GC-----GT--A----AA-GG-GC-GC-----G-TA-G-G-C-G-----G--C-CC-G-T-T-----  
-----AA---G-T-C-T-----G-G-A--G-TG--A-AA-GT--C-C-TG-C-T----TT-T-AA-----G-G-T-G-G-G-A-A-T---T-G-C-T---T-T-----G--GA-T-A---C-----T--G-A-TG--G-G-C---T-T-G-A-G-T--G--C-AG----GA-G-A-----G-G-T-T---AT-C-----GG--A--ATT----C-  
C-C-G-GT--GT-A-G-CG-GT--G---A--A-A---TG-C-GT-AG--AG-A-TC--G-G--G-A-G-G-A-AC-A-CC---AG--T--G--GC-GAA-G--G-C--G-----G--G-T-A-A---CTG--G--AC-T-G-----C-A---A-C-T--GA--CG-C-T-G--A-GG--C-G-CG-A--AA-G-T---G-TG--GG-  
G--AG-C-A-AA-----CA--GG Bacteria(100);Firmicutes(100);unclassified(100);unclassified(100);unclassified(100);unclassified(100);unclassified(100);unclassified(100);unclassified(100);

Otu0856 0 0 0 0 0 0 0 0 0 0 0 0 0 0 0 0 0 0 0 0 0 3 0 0 0 0 0 0 0 5  
0 0 0 0 0 0 0 0 0 0 0 0 0 0 0 0 0 0 0 0 0 0 0 0 0 0 0 0 0 0  
0 0 0 0 0 0 0 0 0 0 0 0 0 0 0 0 0 0 0 0 0 0 0 0 0 0 0 0 0 0  
0 0 0 0 0 0 0 0 0 0 0 0 0 0 0 0 0 0 0 0 0 0 0 0 0 0 0 0 0 0  
M02255\_77\_000000000-ADUT3\_1\_1119\_26354\_17042 T---AC---GA-AG-GGG-----GCT-A-G-----C-G-T---T--GT-T-CGG-AT-----TT-A--C-T--GG-GC-----GT--A----AA-GC-GC-AC-----G-TA-G-G-C-G-----G--A-TT-G-T-T-----  
-----AA---G-T-C-G-----G-G-G--G-TG--A-AA-TC--C-T-GG-A-G----CT-C-AA-----C-T-C-C-A-G-A-A-T---T-G-C-C---T-T-----C--GA-T-A---C-----T--G-G-CT--T-T-C---T-A-G-A-G-G-C---T-GG----AA-G-A-----G-G-T-T---AG-T-----GG--A--ATT----C-  
C-C-A-GT--GT-A-G-AG-GT--G---A--A-A---TT-C-GT-AG--AT-A-TT--G-G--G-A-A-G-A-AC-A-CC---AG--T--G--GC-GAA-G--G-C--G-----G--C-T-A-A---CTG--G--TC-C-A-----G-A---T-C-T--GA--CG-C-T-G--A-GG--T-G-CG-A--AA-G-C---G-TG--GG-  
G--AG-C-A-AA-----CA--GG Bacteria(100);Proteobacteria(100);Alphaproteobacteria(100);Rhizobiales(100);unclassified(100);unclassified(100);unclassified(100);unclassified(100);unclassified(100);

Otu0857 0 0 0 0 0 0 0 0 0 0 0 0 0 0 0 0 0 0 0 0 0 0 0 0 0 0 0 0 0 0  
0 0 0 0 0 0 0 0 0 0 0 0 0 63 0 0 0 0 0 0 0 0 0 0 0 0 0 0 0  
0 0 0 0 0 0 0 0 0 0 0 0 0 0 0 0 0 0 0 0 0 0 0 0 0 0 0 0 0 0  
0 0 0 0 0 0 0 0 0 0 0 0 0 0 0 0 0 0 0 0 0 0 0 0 0 0 0 0 0 0  
M02255\_77\_000000000-ADUT3\_1\_1105\_25479\_18455 T---AC---GTA-G-GGG-----GCG-A-G-----C-G-T---T--GT-C-CGG-AT-----TT-A--C-T--GG-GC-----GT--A----AA-GG-GT-GA-----G-TA-G-G-C-G-----G--T-TA-T-A-T-----  
-----AT---G-T-C-A-----G-A-T--G-TA--A-AA-GG--C-T-AT-G-G----CT-T-AA-----C-C-A-T-A-G-T-T-----A-G--C-A---T-T-----T--GA-A-A---C-----T--G-T--AT--G-A-C---T-T-G-A-G-T--G--C-AG----GA-G-A-----G-G-T-A--AG-T-----GG--A--ATT----C-  
C-T-A-GT--GT-A-G-CG-GT--G---A--A-A---TG-C-GT-AG--AT-A-TT--A-G--G-A-G-G-A-AC-A-CC---AG--T--G--GC-GAA-G--G-C--G-----A--C-T-T-A---CTG--G--AC-T-G-----T-A---A-C-T--GA--CG-C-T-G--A-GT--C-A-CG-A--AA-G-C---G-TG--GG-T--  
AG-C-A-AA-----CA--GG Bacteria(100);Firmicutes(100);Clostridia(100);Clostridiales(100);Family\_XI\_Incertae\_Sedis(100);Sedimentibacter(100);unclassified(100);unclassified(100);unclassified(100);

Otu0858 0 0 0 0 0 0 0 0 0 0 0 0 0 0 0 0 0 0 0 0 0 0 0 0 0 0 0 0 0 0  
0 0 0 0 0 0 0 0 0 0 0 0 0 9 0 0 0 0 0 0 0 0 0 0 0 0 0 0 0 0  
0 0 0 0 0 0 0 0 0 0 0 0 0 0 0 0 0 0 0 0 0 0 0 0 0 0 0 0 0 0  
0 0 0 0 0 0 0 0 0 0 0 0 0 0 0 0 0 0 0 0 0 0 0 0 0 0 0 0 0 0  
M02255\_77\_000000000-ADUT3\_1\_2111\_7392\_15478 T---AC---GT-AG-GGG-----GCA-A-G-----C-G-T---T--GT-C-CGG-AA-----TC-A--T-T--GG-GC-----GT--A----AA-GA-GC-GT-----G-TA-G-G-C-G-----G--T-CC-G-G-T-----  
AA---G-T-C-G-----G-C-T--G-TG--A-AA-GT--C-C-AG-G-G----CT-C-AA-----C-T-C-T-G-G-G--A-----T-G-CC-G---G-T-----C--GA-T-A---C-----T--G-C-CG--G-A-C---T-A-G-A-G-T--T---C-GG----AA-G-A-----G-G-C-G---AG-T-----GG--A--ATT----C-C-  
C-G-GT--GT-A-G-CG-GT--G---A--A-A---TG-C-GC-AG--AT-A-TC--G-G--G-A-G-G-A-AC-A-CC---TA--T--G--GC-GAA-G--G-C--A-----G--C-T-C-G---CTG--G--GA-C-G-----T-T---A-C-T--GA--CG-C-T-G--A-GA--C-G-CG-A--AA-G-C---G-TG--GG-G--  
AG-C-A-AA-----CA--GG Bacteria(100);Actinobacteria(100);Actinobacteria(100);unclassified(100);unclassified(100);unclassified(100);unclassified(100);unclassified(100);unclassified(100);

Otu0859 0 0 0 0 0 0 0 0 0 0 0 0 0 0 0 0 0 0 0 0 0 0 0 0 0 0 0 0 0 0  
0 0 0 0 0 0 0 0 0 0 0 0 8 0 0 12 7 0 0 0 0 15 0 0 0 0 0 0 0 0  
0 0 0 0 0 0 0 0 0 0 0 0 0 0 0 0 0 0 0 0 0 0 0 0 0 0 0 0 0 0  
0 0 0 0 20 0 0 0 0 0 0 0 0 0 0 0 0 0 0 0 0 0 0 0 0 0 0 0 0  
M02255\_76\_000000000-ADUNE\_1\_1110\_20838\_21457 T---AC---GTGCC-AGCA-----GCC-G-C-----G--G-T---A--AT-A-CGT-AG-----GG-C--G-C--GA-GC-----GT--T-----GT-CC-GG-AT-----T-TA---T-T-G-----G--G-TC-G-T-C-----  
-----GC---G-T-C-T-----G-T-C--G-TG--A-AA-GC--C-A-GC-A-G----CT-T-AA-----C-T-G-T-T-G-G--T-C---T-G--C-G---G-T-----G--GG-T-A---C-----G--G-G-CG--G-G-C---T-T-G-A-G-T--G--C-GG----TA-G-G-----G-G-T-G---AC-T-----GG--A--ATT----  
C-C-T-G-GT--GT-A-G-CG-GT--G---G--A-A---TG-C-GC-AG--AT-A-TC--A-G--G-A-G-G-A-AC-A-CC---GA--T--G--GC-GAA-G--G-C--A-----G--G-T-C-A---CTG--G--GC-C-G-----T-T---A-C-T--GA--CA-C-T-G--A-GG--A-G-CG-A--AA-G-C---G-TG--  
GG-G--AG-C-G-AA-----CA--GG Bacteria(100);Actinobacteria(100);Actinobacteria(100);Actinobacteridae(100);Actinomycetales(100);Actinomycineae(100);Actinomycetaceae(100);Mobiluncus(100);unclassified(100);



|                                              |   |                                                                                                                                                                                                                                                                                                                                                                                                                                                                                                                                                                                                                                                                                                                                                                                                                        |   |   |    |   |   |   |    |   |   |    |   |   |   |   |   |   |   |   |   |   |   |   |   |    |   |  |  |
|----------------------------------------------|---|------------------------------------------------------------------------------------------------------------------------------------------------------------------------------------------------------------------------------------------------------------------------------------------------------------------------------------------------------------------------------------------------------------------------------------------------------------------------------------------------------------------------------------------------------------------------------------------------------------------------------------------------------------------------------------------------------------------------------------------------------------------------------------------------------------------------|---|---|----|---|---|---|----|---|---|----|---|---|---|---|---|---|---|---|---|---|---|---|---|----|---|--|--|
| Otu0860                                      | 0 | 0                                                                                                                                                                                                                                                                                                                                                                                                                                                                                                                                                                                                                                                                                                                                                                                                                      | 0 | 0 | 0  | 0 | 0 | 0 | 0  | 0 | 0 | 0  | 0 | 0 | 0 | 0 | 0 | 0 | 0 | 0 | 0 | 0 | 0 | 0 | 0 | 0  | 0 |  |  |
|                                              | 0 | 0                                                                                                                                                                                                                                                                                                                                                                                                                                                                                                                                                                                                                                                                                                                                                                                                                      | 0 | 0 | 0  | 0 | 0 | 0 | 0  | 0 | 0 | 1  | 0 | 0 | 0 | 0 | 0 | 0 | 0 | 0 | 0 | 0 | 0 | 0 | 0 | 0  | 0 |  |  |
|                                              | 0 | 0                                                                                                                                                                                                                                                                                                                                                                                                                                                                                                                                                                                                                                                                                                                                                                                                                      | 0 | 0 | 0  | 0 | 0 | 0 | 0  | 0 | 0 | 0  | 0 | 0 | 0 | 0 | 0 | 0 | 0 | 0 | 1 | 0 | 0 | 0 | 0 | 21 | 0 |  |  |
|                                              | 0 | 0                                                                                                                                                                                                                                                                                                                                                                                                                                                                                                                                                                                                                                                                                                                                                                                                                      | 0 | 0 | 0  | 0 | 0 | 0 | 0  | 0 | 0 | 0  | 1 | 0 | 0 | 0 | 0 | 0 | 0 | 0 | 0 | 0 | 0 | 0 | 0 |    |   |  |  |
| M02255_76_000000000-ADUNE_1_2112_27195_16751 |   | TC---GC---AG-AA-TAA-----GCA-C-C-----G--G--C--T--AACT-CTG-TG-----CC-A--G-C--AG-CC-----GC--G----GT-AA-TA-CA-----G-AG-G-G-T-G-----C--G-AG-C-G-T---<br>-----TA---A-T-C-G-----G-A-T--G-TG--A-AA-TC--C-C-TG-A-G----CT-T-AA-----C-T-T-A-G-G-A--A-T---T-G-C-A--T-T-----C--GA-T-A--C-----T--G-G--GA--A-G-C---T-A-G-A-G-T--A--T-GG----GA-G-A-----G-G-A-T--GG-T-----AG--A--ATT---<br>C-C-A-G-GT--GT-A-G-CG-GT--G---A--A-A---TG-C-GT-AG--AG-A-TC--T-G--G-A-G-G-A-AT-A-CC---GA-T--G--GC-GAA-G--G-C-A-----G--C-C-A-T---CTG--G--CC-T-A-----A-T---A-C-T--GA--CG-C-T-G--A-GG--T-A-CG-A--AA-G-C---A-TG--GG-<br>G--AG-C-A-AA-----CA--GG     Bacteria(100);Proteobacteria(100);Gammaproteobacteria(100);Pseudomonadales(100);Moraxellaceae(100);Acinetobacter(100);unclassified(100);unclassified(100);unclassified(100);                  |   |   |    |   |   |   |    |   |   |    |   |   |   |   |   |   |   |   |   |   |   |   |   |    |   |  |  |
| Otu0861                                      | 0 | 0                                                                                                                                                                                                                                                                                                                                                                                                                                                                                                                                                                                                                                                                                                                                                                                                                      | 0 | 0 | 0  | 0 | 0 | 0 | 0  | 0 | 0 | 0  | 0 | 0 | 0 | 0 | 0 | 0 | 0 | 0 | 3 | 0 | 0 | 0 | 0 | 0  | 0 |  |  |
|                                              | 0 | 0                                                                                                                                                                                                                                                                                                                                                                                                                                                                                                                                                                                                                                                                                                                                                                                                                      | 0 | 0 | 0  | 0 | 0 | 0 | 16 | 3 | 0 | 0  | 0 | 0 | 0 | 0 | 0 | 0 | 0 | 0 | 0 | 0 | 0 | 0 | 0 | 0  | 0 |  |  |
|                                              | 0 | 0                                                                                                                                                                                                                                                                                                                                                                                                                                                                                                                                                                                                                                                                                                                                                                                                                      | 0 | 0 | 0  | 0 | 0 | 0 | 0  | 0 | 0 | 0  | 0 | 0 | 0 | 0 | 0 | 0 | 0 | 0 | 0 | 0 | 0 | 0 | 0 | 0  | 0 |  |  |
|                                              | 0 | 0                                                                                                                                                                                                                                                                                                                                                                                                                                                                                                                                                                                                                                                                                                                                                                                                                      | 0 | 0 | 18 | 0 | 0 | 0 | 0  | 0 | 0 | 0  | 0 | 0 | 0 | 0 | 0 | 0 | 0 | 0 | 0 | 0 | 0 | 0 | 0 | 0  | 0 |  |  |
| M02255_76_000000000-ADUNE_1_2110_21079_10138 |   | C---GG---CT-AA-ATA-----CGT-G-C-----C--A--G---C--AG-C-C-G-CG-----GT-A--A-T--AC-GT-----AT--G----TT-CC-AA-GC-----GTTA-T-C-C-G-----G--T-TA-T-T-T-----<br>---AA---G-T-C-C-----G-A-A--G-TG--A-AA-GC--C-C-AC-A-G----CT-T-AA-----C-T-G-T-G-G-A--A-G---T-G-C-T---T-T-----G--GA-A-A--C-----T--G-G--AT--A-A-C---T-T-G-A-G-T--G--C-AG----TA-G-A-----G-G-A-G--AG-T-----GG--A--ACT---C-C-<br>A-T-GT--GT-A-G-CG-GT--G---A--A-A---TG-C-GT-AG--AT-A-TA--T-G--G-A-A-G-A-AC-A-CC--AG--T--G--GC-GAA-G--G-C-G-----G--C-T-C-T---CTG--G--AC-T-G-----T-A--A-C-T--GA--CG-T-T-G--A-GG--C-T-CG-A--AA-G-T---G-TG--GG-T--<br>AG-C-A-AA-----CA--GG     Bacteria(100);Firmicutes(100);Bacilli(100);Lactobacillales(100);Leuconostocaceae(100);unclassified(100);unclassified(100);unclassified(100);unclassified(100);                                |   |   |    |   |   |   |    |   |   |    |   |   |   |   |   |   |   |   |   |   |   |   |   |    |   |  |  |
| Otu0862                                      | 0 | 0                                                                                                                                                                                                                                                                                                                                                                                                                                                                                                                                                                                                                                                                                                                                                                                                                      | 0 | 0 | 0  | 0 | 0 | 0 | 0  | 0 | 0 | 0  | 0 | 0 | 0 | 0 | 0 | 0 | 0 | 0 | 7 | 0 | 0 | 0 | 0 | 0  | 0 |  |  |
|                                              | 0 | 0                                                                                                                                                                                                                                                                                                                                                                                                                                                                                                                                                                                                                                                                                                                                                                                                                      | 0 | 0 | 0  | 0 | 0 | 0 | 0  | 0 | 0 | 0  | 0 | 0 | 0 | 0 | 0 | 0 | 0 | 0 | 0 | 0 | 0 | 0 | 0 | 0  |   |  |  |
|                                              | 0 | 0                                                                                                                                                                                                                                                                                                                                                                                                                                                                                                                                                                                                                                                                                                                                                                                                                      | 0 | 0 | 0  | 0 | 0 | 0 | 0  | 0 | 0 | 0  | 0 | 0 | 0 | 0 | 0 | 0 | 0 | 0 | 0 | 0 | 0 | 0 | 0 | 0  |   |  |  |
|                                              | 0 | 0                                                                                                                                                                                                                                                                                                                                                                                                                                                                                                                                                                                                                                                                                                                                                                                                                      | 0 | 0 | 0  | 0 | 0 | 0 | 0  | 0 | 0 | 0  | 0 | 0 | 0 | 0 | 0 | 0 | 0 | 0 | 0 | 0 | 0 | 0 | 0 | 0  |   |  |  |
| M02255_77_000000000-ADUT3_1_1103_6104_20140  |   | T---AC---GG-AG-GGG-----GCT-A-G-----C--G--T---T--GT-T-CGG-AA-----TT-A--C-T--GG-GC-----GT--A---AA-GA-GT-AC-----G-TA-G-G-C-G-----G--T-TT-T-T-T-----AA-<br>---G-T-C-A-----G-A-G--G-TG--A-AA-TC--C-C-GG-A-G----CT-C-AA-----C-T-C-C-G-G-A--A-C---T-G-C-C---T-T-----T--GA-A-A--C-----T--G-G--AA--A-G-C---T-A-G-A-A-T--C---A-TG----GA-G-A-----G-G-T-T---AG-T-----GG--A--ATT---C-C-G-A-<br>GT--GT-A-G-AG-GT--G---A--A-A---TT-C-GT-AG--AT-A-TT--C-G--G-A-A-G-A-AC-A-CC--AG--T--G--GC-GAA-G--G-C-G-----A--C-T-G-A---CTG--G--AC-A-T-----G-T---A-T-T--GA--CG-C-T-G--A-GG--T-A-CG-A--AA-G-C---G-TG--GG-G--AG-C-<br>A-AA-----CA--GG     Bacteria(100);Proteobacteria(100);Alphaproteobacteria(100);Sphingomonadales(100);GOBB3-C201(100);unclassified(100);unclassified(100);unclassified(100);unclassified(100);                     |   |   |    |   |   |   |    |   |   |    |   |   |   |   |   |   |   |   |   |   |   |   |   |    |   |  |  |
| Otu0863                                      | 0 | 0                                                                                                                                                                                                                                                                                                                                                                                                                                                                                                                                                                                                                                                                                                                                                                                                                      | 0 | 0 | 0  | 0 | 0 | 0 | 0  | 0 | 0 | 0  | 0 | 0 | 0 | 0 | 0 | 0 | 0 | 0 | 6 | 0 | 0 | 0 | 0 | 0  | 0 |  |  |
|                                              | 0 | 0                                                                                                                                                                                                                                                                                                                                                                                                                                                                                                                                                                                                                                                                                                                                                                                                                      | 0 | 0 | 0  | 0 | 0 | 0 | 0  | 0 | 0 | 0  | 0 | 0 | 0 | 0 | 0 | 0 | 0 | 0 | 0 | 0 | 0 | 0 | 0 | 0  |   |  |  |
|                                              | 0 | 0                                                                                                                                                                                                                                                                                                                                                                                                                                                                                                                                                                                                                                                                                                                                                                                                                      | 0 | 0 | 0  | 0 | 0 | 0 | 0  | 0 | 0 | 0  | 0 | 0 | 0 | 0 | 0 | 0 | 0 | 0 | 0 | 0 | 0 | 0 | 0 | 0  |   |  |  |
|                                              | 0 | 0                                                                                                                                                                                                                                                                                                                                                                                                                                                                                                                                                                                                                                                                                                                                                                                                                      | 0 | 0 | 0  | 0 | 0 | 0 | 0  | 0 | 0 | 0  | 0 | 0 | 0 | 0 | 0 | 0 | 0 | 0 | 0 | 0 | 0 | 0 | 0 | 0  |   |  |  |
| M02255_77_000000000-ADUT3_1_2112_14429_13204 |   | T---AC---GG-AG-GGT-----GCA-A-G-----C--G--T---T--AC-T-CGG-AA-----TC-A--C-T--GG-GC-----GT--A---AA-GG-AC-GC-----G-TA-G-G-C-G-----G--A-TT-A-T-C-----<br>-----AA---G-T-C-T-----T-T-T--G--TG--A-AA-TC--T-A-AT-G-G----CT-C-AA-----C-C-A-T-T-A-A--A-C---T-G--C-T---T-G-----A--GA-A-A--C-----T--G-A--TA--A-T-C---T-A-G-A-G-T--G---A-GG----GA-G-A-----G-G-C-A---GA-T-----GG--A--ATT---G-<br>G-T-G-GT--GT-A-G-GG-GT--A---A--A-A---TC-C-GT-AG--AG-A-TC--A-C--C-A-G-G-A-AT-A-CC---CA--T--T--GC-GAA-G--G-C-G-----A--T-C-T-G---CTG--G--AA-C-T-----T-A---A-C-T--GA--CG-C-T-A--A-TG--C-G-TG-A--AA-G-C---G-TG--GG-G--<br>AG-C-A-AA-----CA--GG     Bacteria(100);Proteobacteria(100);Epsilonproteobacteria(100);Campylobacteriales(100);Campylobacteraceae(100);Campylobacter(100);unclassified(100);unclassified(100);unclassified(100); |   |   |    |   |   |   |    |   |   |    |   |   |   |   |   |   |   |   |   |   |   |   |   |    |   |  |  |
| Otu0864                                      | 0 | 0                                                                                                                                                                                                                                                                                                                                                                                                                                                                                                                                                                                                                                                                                                                                                                                                                      | 0 | 0 | 0  | 0 | 0 | 0 | 0  | 0 | 0 | 0  | 0 | 0 | 0 | 0 | 0 | 0 | 0 | 0 | 0 | 0 | 0 | 0 | 0 | 0  | 0 |  |  |
|                                              | 0 | 0                                                                                                                                                                                                                                                                                                                                                                                                                                                                                                                                                                                                                                                                                                                                                                                                                      | 0 | 0 | 0  | 0 | 0 | 0 | 0  | 0 | 0 | 23 | 0 | 0 | 0 | 0 | 0 | 0 | 0 | 0 | 0 | 0 | 0 | 0 | 0 | 0  |   |  |  |
|                                              | 0 | 0                                                                                                                                                                                                                                                                                                                                                                                                                                                                                                                                                                                                                                                                                                                                                                                                                      | 0 | 0 | 0  | 0 | 0 | 0 | 0  | 0 | 0 | 0  | 0 | 0 | 0 | 0 | 0 | 0 | 0 | 0 | 0 | 0 | 0 | 0 | 0 | 0  |   |  |  |
|                                              | 0 | 0                                                                                                                                                                                                                                                                                                                                                                                                                                                                                                                                                                                                                                                                                                                                                                                                                      | 0 | 0 | 0  | 0 | 0 | 0 | 0  | 0 | 0 | 0  | 0 | 0 | 0 | 0 | 0 | 0 | 0 | 0 | 0 | 0 | 0 | 0 | 0 | 0  |   |  |  |
| M02255_77_000000000-ADUT3_1_1109_25994_12864 |   | T---AC---GT-AG-GGT-----GCA-A-G-----C--G--T---T--GT-C-CGG-AA-----TT-A--T-T--GG-GC-----GT--A---AA-GA-GC-TC-----G-TA-G-G-T-G-----G--C-TT-G-T-T-----<br>----GC---G-T-C-G-----C-C-T--G--TG--A-AA-GC--C-C-GG-G-G----CT-T-AA-----C-T-C-C-G-G-G--T-C---T-G--C-A--G--G-----C--GA-T-A--C-----G--G-G--CA--G-G-C---T-T-G-A-G-G--G--C-AG----CA-G-G-----G-G-A-G--AC-T-----GG--A--ATT---<br>C-C-T-G-GT--GT-A-G-CG-GT--G---A--A-A---TG-C-GC-AG--AT-A-TC--A-G--G-A-G-G-A-AC-A-CC---GG--T--G--GC-GAA-G--G-C-G-----G--G-T-C-T---CTG--G--GC-T-G-----T-A---C-C-T--GA--CA-C-T-G--A-GG--A-G-CG-A--AA-G-C---G-TG--<br>GG-G--AG-C-A-AA-----CA--GG     Bacteria(100);Actinobacteria(100);Actinobacteria(100);Actinobacteridae(100);Actinomycetales(100);unclassified(100);unclassified(100);unclassified(100);unclassified(100);                 |   |   |    |   |   |   |    |   |   |    |   |   |   |   |   |   |   |   |   |   |   |   |   |    |   |  |  |



Otu0865 0 0 0 0 0 0 0 0 0 0 0 0 0 0 0 0 0 0 0 0 0 0 0 0 0 0 0 0 0 0  
0 0 0 0 0 0 0 0 0 0 0 0 33 0 0 0 0 0 0 0 0 0 0 0 0 0 0 0 0  
0 0 0 0 0 0 0 0 0 0 0 0 0 0 0 0 0 0 0 0 0 0 0 0 0 0 0 0 0 0  
0 0 0 0 0 0 0 0 0 0 0 0 0 0 0 0 0 0 0 0 0 0 0 0 0 0 0 0 0 0  
M02255\_77\_000000000-ADUT3\_1\_2102\_28047\_6699 T---AC---GG-AG-GAT-----GCA-A-G-----C--G--T---T--AT-C-CGG-AC-----TG-A--T-T--GG-GT-----GT--A----AA-GC-AT-CT-----G-TA-G-G-C-G-----G--T-TT-T-G-G-----AA-  
---G-T-C-T-----A-C-G--G--TT--A-AA-TC--C-C-AG-A-G-----CT-T-AA-----C-T-T-T-G-GTT--C-A---G-C--C-G--T--A-----G--AG-T-A--C-----T--T-C-AA--A-G-C---T-T-G-A-G-T--A---T-GG-----TA-G-G-----G-G-T-A--GA-G-----GG--A--ACT---T-C-T-C-  
GT--GG-A-G-CG-GT--G---A--A-A---TG-C-AC-AG--AG-A-TG--A-G--A-A-G-G-A-AC-A-CC--AG--T--G--GC-GAA-A-G-C--G-----C-T-C-T-A---CTG--G--GC-C-A-----T-G---A-C-T--GA--CG-C-T-G--AGAG---A-TG-A--CA-G-C---T-GA--GG-G--AG-  
C-G-AA-----TA--GG Bacteria(100);unclassified(100);unclassified(100);unclassified(100);unclassified(100);unclassified(100);unclassified(100);unclassified(100);unclassified(100);

Otu0866 0 0 0 0 0 0 0 0 0 0 0 0 0 0 0 0 0 0 0 0 0 10 0 0 0 0 0 0 0 0  
0 0 0 0 0 0 0 0 0 0 0 0 0 0 0 0 0 0 0 0 0 0 0 0 0 0 0 0 0 0  
0 0 0 0 0 0 0 0 0 0 0 0 0 0 0 0 0 0 0 0 0 0 0 0 0 0 0 0 0 0  
0 0 0 0 0 0 0 0 0 0 0 0 0 0 0 0 0 0 0 0 0 0 0 0 0 0 0 0 0 0  
M02255\_77\_000000000-ADUT3\_1\_1109\_13514\_8790 T---AC---GA-AG-GGG-----GCT-A-G-----C--G--T---T--GC-T-CGG-AA-----TG-A--C-T--GG-GC-----GT--A----AA-GG-GC-GC-----G-TA-G-G-C-G-----G--T-TT-A-T-G-----  
CA---G-T-C-A-----G-A-T--G--TG--A-AA-TC--C-C-CG-G-G-----CT-T-AA-----C-C-T-G-G-G-A--A-C---T-G--C-A---T--T-----T--GA-G-A--C-----G--C-A--TA--G-A-C---T-A-G-A-G-G--T---C-GA---GA-G-A-----G-G-G-T---TG-T-----GG--A--ATT---C-C-C-  
A-GT--GT-A-G-AG-GT--G---A--A-A---TT-C-GT-AG--AT-A-TT--G-G--G-A-A-G-A-AC-A-CC--GG--T--G--GC-GAA-G--G-C--G-----G--C-A-A-C---CTG--G--CT-C-G-----A-T---A-C-T--GA--CG-C-T-G--A-GG--C-G-CG-A--AA-G-C---G-TG--GG-G--  
AG-C-A-AA-----CA--GG Bacteria(100);Proteobacteria(100);Alphaproteobacteria(100);Rhodospirillales(100);Acetobacteraceae(100);Gluconobacter(100);unclassified(100);unclassified(100);unclassified(100);

Otu0867 0 0 0 0 0 0 0 0 0 0 0 0 0 0 0 0 0 0 0 0 0 1 0 0 0 0 0 0 0 0  
0 0 0 0 0 0 0 0 0 0 20 0 0 0 0 0 0 0 0 0 0 0 0 0 0 0 0 0 0  
0 0 0 0 0 0 0 0 0 0 0 0 0 0 0 0 0 0 0 0 0 0 0 0 0 0 0 0 0  
0 0 0 0 0 0 0 0 0 0 0 0 0 0 0 0 0 0 0 0 0 0 0 0 0 0 0 0 0  
M02255\_77\_000000000-ADUT3\_1\_1112\_7152\_22009 T---AC---GA-AG-GGT-----GCT-A-G-----C--G--T---T--GT-T-CGG-AA-----TC-A--C-T--GG-GC-----GT--A----AA-GC-GC-AC-----G-TA-G-G-C-G-----G--T-CC-G-CAC-----  
CA---G-T-C-A-----G-G-C--G--TG--A-AA-GC--C-C-CA-G-G-----CT-C-AA-----C-C-T-G-G-G-A--A-T---T-G--C-G---C--T-----T--GA-T-A--C-----T--A-G--CG--G-G-C---T-A-G-A-G-G--C---C-GG---GA-G-A-----G-G-G-T---AG-T-----GG--A--ATT---C-C-  
C-A-GT--GT-A-G-AG-GT--G---A--A-A---TT-C-GT-AG--AT-A-TT--G-G--G-A-A-G-A-AC-A-CC--AG--T--G--GC-GAA-G--G-C--G-----G--C-T-A-C---CTG--G--AC-C-G-----G-T---T-C-T--GA--CG-C-T-G--A-GG--T-G-CG-A--AA-G-C---G-TG--GG-G--  
AG-C-A-AA-----CA--GG Bacteria(100);Proteobacteria(100);Alphaproteobacteria(100);Rhodospirillales(100);unclassified(100);unclassified(100);unclassified(100);unclassified(100);unclassified(100);

Otu0868 0 0 0 0 0 0 0 0 0 0 0 0 0 0 0 0 0 0 0 0 0 0 0 0 0 0 0 0 0 0  
0 0 0 0 0 0 0 0 0 0 0 0 30 0 0 0 0 0 0 0 0 0 0 0 0 0 0 0 0  
0 0 0 0 0 0 0 0 0 0 0 0 0 0 0 0 0 0 0 0 0 0 0 0 0 0 0 0 0  
0 0 0 0 0 0 0 0 0 0 0 0 0 0 0 0 0 0 0 0 0 0 0 0 0 0 0 0 0  
M02255\_77\_000000000-ADUT3\_1\_1118\_23401\_20327 T---AC---GG-AG-GGG-----GCA-A-G-----C--G--T---T--GT-T-CGG-AA-----TT-A--C-T--GG-GC-----GT--A----AA-GG-GC-GC-----G-TA-G-G-C-G-----G---TA-T-G-T-----  
----CGC---G-T-C-A-----G-G-T--G--TG--A-AA-GC--C-C-CG-G-G-----CT-C-AA-----C-C-T-G-G-G-A--T-G---T-G--C-A---C--T-----T--GA-T-A--C-----G--G-G--CA--T-G-C---T-T-G-A-G-T--T---C-GA---GA-G-A-----G-G-T-G---AG-T-----GG--A--ATT---  
C-C-C-A-GT--GT-A-G-AG-GT--G---A--A-A---TT-C-GT-AG--AT-A-TT--G-G--G-A-A-G-A-AC-A-CC--AG--C--G--GC-GAA-G--G-C--G-----G--C-T-C-A---CTG--G--CT-C-G-----A-A---A-C-T--GA--CG-C-T-G--A-GG--C-G-CG-A--AA-G-C---G-TG--  
GG-G--AG-C-A-AA-----CA--GG Bacteria(100);unclassified(100);unclassified(100);unclassified(100);unclassified(100);unclassified(100);unclassified(100);unclassified(100);unclassified(100);

Otu0869 0 0 0 0 0 0 0 0 0 0 0 0 0 0 0 0 0 0 0 0 0 0 0 0 0 0 0 0 0 0  
0 0 0 0 0 0 0 0 0 0 0 0 18 0 0 0 0 0 0 0 0 0 0 0 0 0 0 0 0  
0 0 8 0 0 0 0 0 0 0 0 0 0 0 0 0 0 0 0 0 0 0 0 0 0 0 0 0 0  
0 0 0 0 0 0 0 0 0 0 0 0 0 0 0 0 0 0 0 0 0 0 0 0 0 0 0 0 0  
M02255\_77\_000000000-ADUT3\_1\_1118\_14342\_16961 T---AC---GT-AG-GGA-----GCG-A-G-----C--G--T---T--GT-C-CGG-AA-----TT-A--C-T--GG-GC-----GT--A----AA-GG-GC-GC-----G-TA-G-G-T-G-----G--T-CC-A-T-T-----  
-----AA---G-T-T-A-----C-T-G--G--TG--A-AA-GT--T-C-GG-G-G-----CT-T-AA-----C-C-C-C-G-T-G--AT---T-G--C-C---T-G-----T--AA-T-A--C-----T--G-G--TG--G-A-C---T-T-G-A-G-T--G---C-AG---GA-G-A-----G-G-G-G---AG-T-----GG--A--ATT---C-  
C-C-A-GT--GT-A-G-CG-GT--G---A--A-A---TG-C-GT-AG--AT-A-TT--G-G--G-A-G-G-A-AC-A-CC--AG--T--G--GC-GAA-G--G-C--G-----G--C-T-C-T---CTG--G--AC-T-G-----T-A---A-C-T--GA--CA-C-T-G--A-GG--C-G-CG-A--AA-G-C---G-TG--GG-  
G--AG-C-A-AA-----CA--GG Bacteria(100);Firmicutes(100);Clostridia(100);Clostridiales(100);unclassified(100);unclassified(100);unclassified(100);unclassified(100);unclassified(100);



|                                                                                                                                                                                                                                                                                                                                                                                                                                                                                                                                                                                                                          |   |   |   |   |   |   |   |   |    |   |   |   |   |    |   |   |   |   |   |   |   |   |   |   |   |   |   |
|--------------------------------------------------------------------------------------------------------------------------------------------------------------------------------------------------------------------------------------------------------------------------------------------------------------------------------------------------------------------------------------------------------------------------------------------------------------------------------------------------------------------------------------------------------------------------------------------------------------------------|---|---|---|---|---|---|---|---|----|---|---|---|---|----|---|---|---|---|---|---|---|---|---|---|---|---|---|
| Otu0870                                                                                                                                                                                                                                                                                                                                                                                                                                                                                                                                                                                                                  | 0 | 0 | 0 | 0 | 0 | 0 | 0 | 0 | 0  | 0 | 0 | 0 | 0 | 0  | 0 | 0 | 0 | 0 | 0 | 0 | 0 | 0 | 0 | 0 | 0 | 0 | 0 |
|                                                                                                                                                                                                                                                                                                                                                                                                                                                                                                                                                                                                                          | 0 | 0 | 0 | 0 | 0 | 0 | 0 | 0 | 0  | 0 | 0 | 0 | 0 | 0  | 0 | 0 | 0 | 0 | 0 | 0 | 0 | 0 | 0 | 0 | 0 | 0 | 0 |
|                                                                                                                                                                                                                                                                                                                                                                                                                                                                                                                                                                                                                          | 0 | 0 | 0 | 0 | 1 | 0 | 0 | 0 | 0  | 0 | 0 | 0 | 0 | 0  | 0 | 0 | 0 | 0 | 0 | 0 | 0 | 0 | 9 | 0 | 0 | 0 | 0 |
|                                                                                                                                                                                                                                                                                                                                                                                                                                                                                                                                                                                                                          | 0 | 0 | 0 | 0 | 0 | 0 | 0 | 0 | 0  | 0 | 0 | 0 | 0 | 0  | 0 | 0 | 0 | 0 | 0 | 0 | 0 | 0 | 0 | 0 | 0 |   |   |
| M02255_77_000000000-ADUT3_1_1117_25030_13456                                                                                                                                                                                                                                                                                                                                                                                                                                                                                                                                                                             |   |   |   |   |   |   |   |   |    |   |   |   |   |    |   |   |   |   |   |   |   |   |   |   |   |   |   |
| G---AC---GG-GG-GGG-----GCA-A-G-----T--G--T---T-CT-T-CGG-AA-----TG-A--C-T--GG-GC-----GT--A----AA-GG-GC-AC-----G-TA-G-G-C-G-----G--T-GA-A-T-C---<br>-----GG---G-T-T-G-----A-A-A--G--TG--A-AA-G---T-C-G--C-C---AA-A-AA-----C-T-G-G-G-G-G--A-A---T-G--C-T--C--T-----C-GA-A-A--C-----C--A-A--TT--C-A-C---T-T-G-A-G-T--G--A-GA-----CA-G-A-----G-G-A-G--AG-T-----GG--A--ATT---<br>T-C-G-T-GT--GT-A-G-GG-GT--G---A--A---TC-C-GG-AG--AT-C-TA--C-G--A-A-G-G-A-AC-G-CC---AA--A--A--GC-GAA-G--G-C--A-----G--C-T-C-T--CTG--G--GT-C-C-----C-T---A-C-C--GA--CG-C-T-G--G-AG--T-G-CG-A--AA-G-C---A-TG--GG-<br>G--AG-C-G-AA-----CG--GG     |   |   |   |   |   |   |   |   |    |   |   |   |   |    |   |   |   |   |   |   |   |   |   |   |   |   |   |
| Bacteria(100);unclassified(100);unclassified(100);unclassified(100);unclassified(100);unclassified(100);unclassified(100);unclassified(100);unclassified(100);                                                                                                                                                                                                                                                                                                                                                                                                                                                           |   |   |   |   |   |   |   |   |    |   |   |   |   |    |   |   |   |   |   |   |   |   |   |   |   |   |   |
| Otu0871                                                                                                                                                                                                                                                                                                                                                                                                                                                                                                                                                                                                                  | 0 | 0 | 0 | 0 | 0 | 0 | 0 | 0 | 0  | 0 | 0 | 0 | 0 | 0  | 0 | 0 | 0 | 0 | 0 | 0 | 0 | 0 | 0 | 0 | 0 | 0 | 0 |
|                                                                                                                                                                                                                                                                                                                                                                                                                                                                                                                                                                                                                          | 0 | 0 | 0 | 0 | 0 | 0 | 0 | 0 | 0  | 0 | 0 | 0 | 0 | 60 | 0 | 0 | 0 | 0 | 0 | 0 | 0 | 0 | 0 | 0 | 0 | 0 | 0 |
|                                                                                                                                                                                                                                                                                                                                                                                                                                                                                                                                                                                                                          | 0 | 0 | 0 | 0 | 0 | 0 | 0 | 0 | 0  | 0 | 0 | 0 | 0 | 0  | 0 | 0 | 0 | 0 | 0 | 0 | 0 | 0 | 0 | 0 | 0 | 0 | 0 |
|                                                                                                                                                                                                                                                                                                                                                                                                                                                                                                                                                                                                                          | 0 | 0 | 0 | 0 | 0 | 0 | 0 | 0 | 0  | 0 | 0 | 0 | 0 | 0  | 0 | 0 | 0 | 0 | 0 | 0 | 0 | 0 | 0 | 0 | 0 | 0 | 0 |
| M02255_77_000000000-ADUT3_1_1101_14138_3640                                                                                                                                                                                                                                                                                                                                                                                                                                                                                                                                                                              |   |   |   |   |   |   |   |   |    |   |   |   |   |    |   |   |   |   |   |   |   |   |   |   |   |   |   |
| T---AC---GT-AG-GGG-----GCA-A-G-----C--G--T---T--AT-C-CGG-AA-----TC-A--T-T--GG-GC-----GT--A----AA-GG-GT-GC-----G-TA-G-G-C-T-----G--C-CC-T-A-T-----AG-<br>---G-T-C-A-----G-A-G--G--TC--A-AA-GG--C-T-AC-G-G---CT-C-AA-----C-C-G-T-A-G-T-A-----A-G--C-C---T--T-----T-GA-A-A--C-----T-G-T-AG--G-G-C---T-T-G-A-G-T--G--C-AG---GA-G-A-----G-G-A-G--AG-T-----GG--A--ATT---C-C-T-A-<br>GT--GT-A-G-CG-GT--G---A--A---TG-C-GT-AG--AT-A-TT--A-G--G-A-G-G-A-AC-A-CC---AG--T--G--GC-GAA-G--G-C--G-----A--C-T-C-T--CTG--G--AC-T-G-----C-A---A-C-T--GA--CG-C-T-G--A-GG--C-A-CG-A--AA-G-C---G-TG--GG-T--AG-C-<br>G-AA-----CA--GG          |   |   |   |   |   |   |   |   |    |   |   |   |   |    |   |   |   |   |   |   |   |   |   |   |   |   |   |
| Bacteria(100);Firmicutes(100);Clostridia(100);Clostridiales(100);unclassified(100);unclassified(100);unclassified(100);unclassified(100);unclassified(100);                                                                                                                                                                                                                                                                                                                                                                                                                                                              |   |   |   |   |   |   |   |   |    |   |   |   |   |    |   |   |   |   |   |   |   |   |   |   |   |   |   |
| Otu0872                                                                                                                                                                                                                                                                                                                                                                                                                                                                                                                                                                                                                  | 0 | 0 | 0 | 0 | 0 | 0 | 0 | 0 | 0  | 0 | 0 | 0 | 0 | 0  | 0 | 0 | 0 | 0 | 0 | 2 | 6 | 0 | 0 | 0 | 0 | 0 | 0 |
|                                                                                                                                                                                                                                                                                                                                                                                                                                                                                                                                                                                                                          | 0 | 0 | 0 | 0 | 0 | 0 | 0 | 0 | 12 | 0 | 0 | 0 | 0 | 0  | 0 | 0 | 0 | 0 | 0 | 0 | 0 | 0 | 0 | 0 | 0 | 0 | 0 |
|                                                                                                                                                                                                                                                                                                                                                                                                                                                                                                                                                                                                                          | 0 | 0 | 0 | 0 | 0 | 0 | 0 | 0 | 0  | 0 | 0 | 0 | 0 | 0  | 0 | 0 | 0 | 0 | 0 | 0 | 0 | 0 | 0 | 0 | 0 | 0 | 0 |
|                                                                                                                                                                                                                                                                                                                                                                                                                                                                                                                                                                                                                          | 0 | 0 | 0 | 0 | 0 | 0 | 0 | 0 | 0  | 0 | 0 | 0 | 0 | 0  | 0 | 0 | 0 | 0 | 0 | 0 | 0 | 0 | 0 | 0 | 0 | 0 | 0 |
| M02255_77_000000000-ADUT3_1_2118_4938_8350                                                                                                                                                                                                                                                                                                                                                                                                                                                                                                                                                                               |   |   |   |   |   |   |   |   |    |   |   |   |   |    |   |   |   |   |   |   |   |   |   |   |   |   |   |
| T---AC---GG-AG-GAT-----CCA-A-G-----C--G--T---T--AT-C-CGG-AA-----TT-A--C-T--GG-GC-----GT--A----AA-GA-GTTGC-----G-TA-G-G-T-G-----G--C-AT-A-G-T-----<br>AA---G-T-A-A-----G-T-A--G--TG--A-AA-GC--C-T-GG-G-G---CT-C-AA-----C-C-C-T-T-T-A--A-A---C-A--T-T--A--T-----T--TA-A-A--C-----T-G-C--TA--A-G-C---T-A-G-A-G-G--G--C-GA---GA-G-A-----G-G-T-T---AC-T-----AG--A--ATT---C-C-T-<br>T-GT--GT-A-G-GA-GT--G---A--A---TC-C-GT-AG--AT-A-TA--A-G--G-A-G-G-A-AT-A-CC---GA--T--G--GC-GTA-G--G-C--A-----G--G-T-A-A---CTG--G--CT-C-G-----T-C---C-C-T--GA--CA-C-T-A--A-GG--C-A-CG-A--AA-G-C---G-TG--GG-T--AG-<br>C-A-AA-----CG--GG       |   |   |   |   |   |   |   |   |    |   |   |   |   |    |   |   |   |   |   |   |   |   |   |   |   |   |   |
| Bacteria(100);Candidate_division_TM7(100);unclassified(100);unclassified(100);unclassified(100);unclassified(100);unclassified(100);unclassified(100);unclassified(100);                                                                                                                                                                                                                                                                                                                                                                                                                                                 |   |   |   |   |   |   |   |   |    |   |   |   |   |    |   |   |   |   |   |   |   |   |   |   |   |   |   |
| Otu0873                                                                                                                                                                                                                                                                                                                                                                                                                                                                                                                                                                                                                  | 0 | 0 | 0 | 0 | 0 | 0 | 0 | 0 | 0  | 0 | 0 | 0 | 0 | 0  | 0 | 0 | 0 | 0 | 0 | 0 | 0 | 0 | 0 | 0 | 0 | 0 | 0 |
|                                                                                                                                                                                                                                                                                                                                                                                                                                                                                                                                                                                                                          | 0 | 0 | 0 | 0 | 0 | 0 | 0 | 0 | 0  | 0 | 0 | 0 | 0 | 31 | 0 | 0 | 0 | 0 | 0 | 0 | 0 | 0 | 0 | 0 | 0 | 0 | 0 |
|                                                                                                                                                                                                                                                                                                                                                                                                                                                                                                                                                                                                                          | 0 | 0 | 0 | 0 | 0 | 0 | 0 | 0 | 0  | 0 | 0 | 0 | 0 | 0  | 0 | 0 | 0 | 0 | 0 | 0 | 0 | 0 | 0 | 0 | 0 | 0 | 0 |
|                                                                                                                                                                                                                                                                                                                                                                                                                                                                                                                                                                                                                          | 0 | 0 | 0 | 0 | 0 | 0 | 0 | 0 | 0  | 0 | 0 | 0 | 0 | 0  | 0 | 0 | 0 | 0 | 0 | 0 | 0 | 0 | 0 | 0 | 0 | 0 | 0 |
| M02255_77_000000000-ADUT3_1_1108_12315_24609                                                                                                                                                                                                                                                                                                                                                                                                                                                                                                                                                                             |   |   |   |   |   |   |   |   |    |   |   |   |   |    |   |   |   |   |   |   |   |   |   |   |   |   |   |
| T---AC---GT-AG-GGC-----GCA-A-G-----C--G--T---T--GT-C-CGG-AA-----TT-A--T-T--GG-GC-----GT--A----AA-GA-GC-TC-----G-TA-G-G-C-G-----G--T-CT-G-T-C-----<br>----AC---G-T-C-T-----G-C-T--G--TG--A-AA-AC--C-C-GA-G-G---CT-C-AA-----C-C-T-C-G-G-G--C-T---T-G--C-A--G--T-----G--GG-T-A--C-----G--G-G--CA--G-A-C---T-A-G-A-G-T--G---C-GG---TA-G-G-----G-G-A-G---AC-T-----GG--A--ATT---C-<br>C-T-G-GT--GT-A-G-CG-GT--A---A--A---TG-C-AC-AG--AT-A-TC--A-G--G-A-G-G-A-AC-A-CC---GA--T--G--GC-GAA-G--G-C--A-----G--G-T-C-T---CTG--G--GC-C-G-----C-A---A-C-T--GA--CG-C-T-G--A-GG--A-G-CG-A--AA-G-C---G-TG--GG-<br>T--AG-C-A-AA-----CA--GG |   |   |   |   |   |   |   |   |    |   |   |   |   |    |   |   |   |   |   |   |   |   |   |   |   |   |   |
| Bacteria(100);Actinobacteria(100);Actinobacteria(100);Actinobacteridae(100);Actinomycetales(100);Micrococcineae(100);unclassified(100);unclassified(100);unclassified(100);                                                                                                                                                                                                                                                                                                                                                                                                                                              |   |   |   |   |   |   |   |   |    |   |   |   |   |    |   |   |   |   |   |   |   |   |   |   |   |   |   |
| Otu0874                                                                                                                                                                                                                                                                                                                                                                                                                                                                                                                                                                                                                  | 0 | 0 | 0 | 0 | 0 | 0 | 0 | 0 | 0  | 0 | 0 | 0 | 0 | 0  | 0 | 0 | 0 | 0 | 0 | 0 | 0 | 0 | 0 | 0 | 0 | 0 | 0 |
|                                                                                                                                                                                                                                                                                                                                                                                                                                                                                                                                                                                                                          | 0 | 0 | 0 | 0 | 0 | 0 | 0 | 0 | 0  | 0 | 0 | 0 | 0 | 46 | 0 | 0 | 0 | 0 | 0 | 0 | 0 | 0 | 0 | 0 | 0 | 0 | 0 |
|                                                                                                                                                                                                                                                                                                                                                                                                                                                                                                                                                                                                                          | 0 | 0 | 0 | 0 | 0 | 0 | 0 | 0 | 0  | 0 | 0 | 0 | 0 | 0  | 0 | 0 | 0 | 0 | 0 | 0 | 0 | 0 | 0 | 0 | 0 | 0 | 0 |
|                                                                                                                                                                                                                                                                                                                                                                                                                                                                                                                                                                                                                          | 0 | 0 | 0 | 0 | 0 | 0 | 0 | 0 | 0  | 0 | 0 | 0 | 0 | 0  | 0 | 0 | 0 | 0 | 0 | 0 | 0 | 0 | 0 | 0 | 0 | 0 | 0 |
| M02255_77_000000000-ADUT3_1_1105_17420_11769                                                                                                                                                                                                                                                                                                                                                                                                                                                                                                                                                                             |   |   |   |   |   |   |   |   |    |   |   |   |   |    |   |   |   |   |   |   |   |   |   |   |   |   |   |
| C---AC---GT-AG-GCA-----CCA-A-G-----C--G--T---T--GT-C-CGG-AT-----TT-A--T-T--GG-GC-----GT--A----AA-GA-GC-TC-----G-TA-G-G-C-G-----G--T-TC-G-A-T-----<br>----AA---G-T-C-G-----G-G-T--G--TG--A-AA-AC--T-T-TG-G-G---CT-C-AA-----C-C-C-A-A-A-G--C-----G-T-GC-A--T--T-----C--GA-T-A--C-----T--G-T--TG-TG-A-C---T-A-G-A-G-T--T---C-GG---TA-G-G-----G-G-A-G---TG-G-----GG--A--ATT---C-<br>C-T-A-GT--GT-A-G-CG-GT--G---A--A---TG-C-GC-AG--AT-A-TT--A-G--G-A-G-G-A-AC-A-CC---GG--T--G--GC-GAA-G--G-C--G-----C--C-A-C-T---CTG--G--GC-C-G-----A-A---A-C-T--GA--CG-C-T-G--A-GG--A-G-CG-A--AA-G-C---G-TG--GG-<br>T--AG-C-A-AA-----CA--GG |   |   |   |   |   |   |   |   |    |   |   |   |   |    |   |   |   |   |   |   |   |   |   |   |   |   |   |
| Bacteria(100);Actinobacteria(100);Actinobacteria(100);Acidimicrobidae(100);Acidimicrobiales(100);Acidimicrobinae(100);unclassified(100);unclassified(100);unclassified(100);                                                                                                                                                                                                                                                                                                                                                                                                                                             |   |   |   |   |   |   |   |   |    |   |   |   |   |    |   |   |   |   |   |   |   |   |   |   |   |   |   |



|                                                                                                                                                                                                                          |   |   |   |   |   |   |   |   |    |   |   |   |   |     |   |   |   |   |   |   |   |   |   |   |   |   |   |
|--------------------------------------------------------------------------------------------------------------------------------------------------------------------------------------------------------------------------|---|---|---|---|---|---|---|---|----|---|---|---|---|-----|---|---|---|---|---|---|---|---|---|---|---|---|---|
| Otu0875                                                                                                                                                                                                                  | 0 | 0 | 0 | 0 | 0 | 0 | 0 | 0 | 0  | 0 | 0 | 0 | 0 | 0   | 0 | 0 | 0 | 0 | 0 | 0 | 0 | 0 | 0 | 0 | 0 | 0 | 0 |
|                                                                                                                                                                                                                          | 0 | 0 | 0 | 0 | 0 | 0 | 0 | 0 | 0  | 0 | 0 | 0 | 0 | 64  | 0 | 0 | 0 | 0 | 0 | 0 | 0 | 0 | 0 | 0 | 0 | 0 | 0 |
|                                                                                                                                                                                                                          | 0 | 0 | 0 | 0 | 0 | 0 | 0 | 0 | 0  | 0 | 0 | 0 | 0 | 0   | 0 | 0 | 0 | 0 | 0 | 0 | 0 | 0 | 0 | 0 | 0 | 0 | 0 |
|                                                                                                                                                                                                                          | 0 | 0 | 0 | 0 | 0 | 0 | 0 | 0 | 0  | 0 | 0 | 0 | 0 | 0   | 0 | 0 | 0 | 0 | 0 | 0 | 0 | 0 | 0 | 0 | 0 |   |   |
| M02255_77_000000000-ADUT3_1_1105_7977_9509 G---AC---AG-AG-GGT-----GCT-A-G-----C--G--T---T--GT-T-CGG-AA-----TT-A--C-T--GG-GC-----GT--A----AA-GG-GC-GC-----G-TA-G-G-C-G-----G--C-CA-T-G-T-----                             |   |   |   |   |   |   |   |   |    |   |   |   |   |     |   |   |   |   |   |   |   |   |   |   |   |   |   |
| AA---G-T-C-G-----G-A-T--G--TG--A-AA-TC--C-C-GG-G-G-----CT-C-AA-----C-C-C-C-G-G-A--A-C---T-G--C-A---T--T-----C--GA-T-A--C-----T--G-T--GT--G-G-C---T-A-G-A-G-A--C---C-GG---AA-G-A-----G-G-T-G---GG-T-----GG--A--ATA---C-C- |   |   |   |   |   |   |   |   |    |   |   |   |   |     |   |   |   |   |   |   |   |   |   |   |   |   |   |
| C-A-GT--GT-A-G-AG-GT--G---A--A---TT-C-GT-AG--AT-A-TT--G-G--G-T-G-G-A-AC-A-CC---GG--T--G--GC-GAA-G--G-C--G-----G--C-T-C-A--CTG--G--TC-C-G-----G-T---T-C-T--GA--CG-C-T-G--A-GG--C-G-CG-A--AA-G-C---G-T-G-GG-G--            |   |   |   |   |   |   |   |   |    |   |   |   |   |     |   |   |   |   |   |   |   |   |   |   |   |   |   |
| AG-C-A-AA-----CA--GG Bacteria(100);Proteobacteria(100);Alphaproteobacteria(100);unclassified(100);unclassified(100);unclassified(100);unclassified(100);unclassified(100);unclassified(100);                             |   |   |   |   |   |   |   |   |    |   |   |   |   |     |   |   |   |   |   |   |   |   |   |   |   |   |   |
| Otu0876                                                                                                                                                                                                                  | 0 | 0 | 0 | 0 | 0 | 0 | 0 | 0 | 0  | 0 | 0 | 0 | 0 | 0   | 0 | 0 | 0 | 0 | 0 | 0 | 0 | 0 | 0 | 0 | 0 | 0 | 0 |
|                                                                                                                                                                                                                          | 0 | 0 | 0 | 0 | 0 | 0 | 0 | 0 | 0  | 0 | 0 | 0 | 0 | 84  | 0 | 0 | 0 | 0 | 0 | 0 | 0 | 0 | 0 | 0 | 0 | 0 | 0 |
|                                                                                                                                                                                                                          | 0 | 0 | 0 | 0 | 0 | 0 | 0 | 0 | 0  | 0 | 0 | 0 | 0 | 0   | 0 | 0 | 0 | 0 | 0 | 0 | 0 | 0 | 0 | 0 | 0 | 0 | 0 |
|                                                                                                                                                                                                                          | 0 | 0 | 0 | 0 | 0 | 0 | 0 | 0 | 0  | 0 | 0 | 0 | 0 | 0   | 0 | 0 | 0 | 0 | 0 | 0 | 0 | 0 | 0 | 0 | 0 |   |   |
| M02255_77_000000000-ADUT3_1_1105_21288_9159 T---AC---GT-AG-GGG-----GCT-A-G-----C--G--T---T--AT-C-CGG-AA-----TT-A--T-T--GG-GC-----GT--A----AA-GG-GT-GC-----G-TA-G-G-C-G-----G--T-CC-T-A-C-----AA-                         |   |   |   |   |   |   |   |   |    |   |   |   |   |     |   |   |   |   |   |   |   |   |   |   |   |   |   |
| ---G-T-C-A-----G-A-G--G--TG--A-AA-GG--C-T-AC-G-G-----CT-C-AA-----C-C-G-T-A-G-T-A-----A-G--C-C---T--T-----T--GA-A-A--C-----T--G-T--AG--G-A-C---T-T-G-A-G-T--G---C-AG---GA-G-A-----G-G-A-G--AG-T-----GG--A--ATT---C-C-C-A- |   |   |   |   |   |   |   |   |    |   |   |   |   |     |   |   |   |   |   |   |   |   |   |   |   |   |   |
| GT--GT-A-G-CG-GT--G---A--A---TG-C-GT-AG--AT-A-TT--G-G--G-A-G-G-A-AC-A-CC---AG--T--T--GC-GAA-G--G-C--G-----G--C-T-C-T--CTG--G--AC-T-G-----T-A---A-C-T--GA--CG-C-T-G--A-GG--C-A-CG-A--AA-G-C---G-TG--GG-G--AG-             |   |   |   |   |   |   |   |   |    |   |   |   |   |     |   |   |   |   |   |   |   |   |   |   |   |   |   |
| C-G-AA-----CA--GG Bacteria(100);Firmicutes(100);Clostridia(100);Clostridiales(100);Peptostreptococcaceae(100);Sporacetigenium(100);unclassified(100);unclassified(100);unclassified(100);                                |   |   |   |   |   |   |   |   |    |   |   |   |   |     |   |   |   |   |   |   |   |   |   |   |   |   |   |
| Otu0877                                                                                                                                                                                                                  | 0 | 0 | 0 | 0 | 0 | 0 | 0 | 0 | 0  | 0 | 0 | 0 | 0 | 0   | 0 | 0 | 0 | 0 | 0 | 3 | 9 | 0 | 0 | 0 | 0 | 0 | 0 |
|                                                                                                                                                                                                                          | 0 | 0 | 0 | 0 | 0 | 0 | 0 | 0 | 30 | 1 | 0 | 0 | 0 | 0   | 0 | 0 | 0 | 0 | 0 | 0 | 0 | 0 | 0 | 0 | 0 | 0 | 0 |
|                                                                                                                                                                                                                          | 0 | 0 | 0 | 0 | 0 | 0 | 0 | 0 | 0  | 0 | 0 | 0 | 0 | 0   | 0 | 0 | 0 | 0 | 0 | 0 | 0 | 0 | 0 | 0 | 0 | 0 | 0 |
|                                                                                                                                                                                                                          | 0 | 0 | 0 | 0 | 0 | 0 | 0 | 0 | 0  | 0 | 0 | 0 | 0 | 0   | 0 | 0 | 0 | 0 | 0 | 0 | 0 | 0 | 0 | 0 | 0 |   |   |
| M02255_77_000000000-ADUT3_1_1110_19519_10174 T---AC---GT-AG-GTG-----GCA-A-G-----C--G--T---T--GT-C-CGG-AT-----TT-A--C-T--GG-GC-----GT--A----AA-GG-GC-GT-----G-CA-G-G-C-G-----G--T-TT-G-T-T-----                           |   |   |   |   |   |   |   |   |    |   |   |   |   |     |   |   |   |   |   |   |   |   |   |   |   |   |   |
| ----AA---G-T-C-T-----A-G-G--G--TG--A-AA-GC--T-C-CC-G-G-----CT-C-AA-----C-T-G-G-G-A-G--A-G---G-T--C-C---T--T-----G--GA-T-A--C-----T--G-G--CA--G-A-C---T-T-G-A-G-G--A--G-AG---TA-G-A-----G-G-A-G--AG-T-----GG--A--ATT---   |   |   |   |   |   |   |   |   |    |   |   |   |   |     |   |   |   |   |   |   |   |   |   |   |   |   |   |
| C-C-C-G-GT--GT-A-G-TG-GT--G---A--T-A---TG-C-GT-AG--AT-A-TC--G-G--G-A-G-G-A-AC-A-CC---AG--T--G--GC-GAA-G--G-C--G-----G--C-T-C-T--CTG--G--GC-T-C-----T-A---C-C-T--GA--CG-C-T-G--A-GA--C-G-CG-A--AA-G-C---G-TG--GG-         |   |   |   |   |   |   |   |   |    |   |   |   |   |     |   |   |   |   |   |   |   |   |   |   |   |   |   |
| G--AG-C-G-AA-----CC--GG Bacteria(100);Chloroflexi(100);S085(100);unclassified(100);unclassified(100);unclassified(100);unclassified(100);unclassified(100);unclassified(100);                                            |   |   |   |   |   |   |   |   |    |   |   |   |   |     |   |   |   |   |   |   |   |   |   |   |   |   |   |
| Otu0878                                                                                                                                                                                                                  | 0 | 0 | 0 | 0 | 0 | 0 | 0 | 0 | 0  | 0 | 0 | 0 | 0 | 0   | 0 | 0 | 0 | 0 | 0 | 0 | 0 | 0 | 0 | 0 | 0 | 0 | 0 |
|                                                                                                                                                                                                                          | 0 | 0 | 0 | 0 | 0 | 0 | 0 | 0 | 0  | 0 | 0 | 0 | 0 | 112 | 0 | 0 | 0 | 0 | 0 | 0 | 0 | 0 | 0 | 0 | 0 | 0 | 0 |
|                                                                                                                                                                                                                          | 0 | 0 | 0 | 0 | 0 | 0 | 0 | 0 | 0  | 0 | 0 | 0 | 0 | 0   | 0 | 0 | 0 | 0 | 0 | 0 | 0 | 0 | 0 | 0 | 0 | 0 | 0 |
|                                                                                                                                                                                                                          | 0 | 0 | 0 | 0 | 0 | 0 | 0 | 0 | 0  | 0 | 0 | 0 | 0 | 0   | 0 | 0 | 0 | 0 | 0 | 0 | 0 | 0 | 0 | 0 | 0 |   |   |
| M02255_77_000000000-ADUT3_1_1102_24387_21281 T---AC---GA-AG-GGG-----GCA-A-G-----C--G--T---T--GT-T-CGG-AT-----TT-A--C-T--GG-GC-----GT--A----AA-GG-GC-GC-----G-CA-G-G-C-G-----G--C-TC-T-T-C-----                           |   |   |   |   |   |   |   |   |    |   |   |   |   |     |   |   |   |   |   |   |   |   |   |   |   |   |   |
| ----AA---G-T-C-A-----G-A-T--G--TG--A-AA-GC--C-C-CG-G-G-----CT-C-AA-----C-C-T-G-G-G-A-A-C---T-G--C-A---T--T-----T--GA-G-A--C-----T--G-A--AG--A-A-C---T-C-G-A-G-T--T---C-GG---GA-G-A-----G-G-A-T---GG-C-----GG--A--ATT---  |   |   |   |   |   |   |   |   |    |   |   |   |   |     |   |   |   |   |   |   |   |   |   |   |   |   |   |
| C-C-C-A-GT--GT-A-G-AG-GT--G---A--A---TT-C-GT-AG--AT-A-TT--G-G--G-A-A-G-A-AC-A-CC---GG--T--G--GC-GAA-G--G-C--G-----G--C-C-A-T---CTG--G--AC-C-G-----A-G---A-C-T--GA--CG-C-T-G--A-GG--C-G-CG-A--AA-G-C---G-TG--GG-          |   |   |   |   |   |   |   |   |    |   |   |   |   |     |   |   |   |   |   |   |   |   |   |   |   |   |   |
| GG-G--AG-C-A-AA-----CA--GG Bacteria(100);Proteobacteria(100);Alphaproteobacteria(100);Rhodospirillales(100);unclassified(100);unclassified(100);unclassified(100);unclassified(100);unclassified(100);                   |   |   |   |   |   |   |   |   |    |   |   |   |   |     |   |   |   |   |   |   |   |   |   |   |   |   |   |
| Otu0879                                                                                                                                                                                                                  | 0 | 0 | 0 | 0 | 0 | 0 | 0 | 0 | 0  | 0 | 0 | 0 | 0 | 0   | 0 | 0 | 0 | 0 | 0 | 0 | 0 | 0 | 0 | 0 | 0 | 0 | 0 |
|                                                                                                                                                                                                                          | 0 | 0 | 0 | 0 | 0 | 0 | 0 | 0 | 0  | 0 | 0 | 0 | 0 | 53  | 0 | 0 | 0 | 0 | 0 | 0 | 0 | 0 | 0 | 0 | 0 | 0 | 0 |
|                                                                                                                                                                                                                          | 0 | 0 | 0 | 0 | 0 | 0 | 0 | 0 | 0  | 0 | 0 | 0 | 0 | 0   | 0 | 0 | 0 | 0 | 0 | 0 | 0 | 0 | 0 | 0 | 0 | 0 | 0 |
|                                                                                                                                                                                                                          | 0 | 0 | 0 | 0 | 0 | 0 | 0 | 0 | 0  | 0 | 0 | 0 | 0 | 0   | 0 | 0 | 0 | 0 | 0 | 0 | 0 | 0 | 0 | 0 | 0 |   |   |
| M02255_77_000000000-ADUT3_1_1102_13661_17734 C---AC---GT-AG-GCA-----CCA-A-G-----C--G--T---T--GT-C-CGG-AT-----TT-A--T-T--GG-GC-----GT--A----AA-GA-GC-TC-----G-TA-G-G-C-G-----G--T-TC-G-G-T-----                           |   |   |   |   |   |   |   |   |    |   |   |   |   |     |   |   |   |   |   |   |   |   |   |   |   |   |   |
| ----AA---G-T-C-G-----G-G-T--G--TG--A-AA-AC--C-T-TG-G-G-----CT-C-AA-----C-C-C-A-A-G-G--A-----C-T-GC-A--C--T-----C--GA-T-A--C-----T--G-C--TG-TG-A-C---T-T-G-A-G-T--C---C-GG---TA-G-G-----G-G-A-G--TG-G-----GG--A--ATT---   |   |   |   |   |   |   |   |   |    |   |   |   |   |     |   |   |   |   |   |   |   |   |   |   |   |   |   |
| C-T-G-GT--GT-A-G-CG-GT--G---G--A-A---TG-C-GC-AG--AT-A-TC--A-G--G-A-G-G-A-AC-A-CC---GG--T--G--GC-GAA-G--G-C--G-----C--C-A-C-T---CTG--G--GC-C-G-----G-T---A-C-T--GA--CG-C-T-G--A-GG--A-G-CG-A--AA-G-C---G-TG--GG-          |   |   |   |   |   |   |   |   |    |   |   |   |   |     |   |   |   |   |   |   |   |   |   |   |   |   |   |
| G--AG-C-G-AA-----CA--GG Bacteria(100);Actinobacteria(100);Actinobacteria(100);Acidimicrobidae(100);Acidimicrobiales(100);Acidimicrobinaeae(100);unclassified(100);unclassified(100);unclassified(100);                   |   |   |   |   |   |   |   |   |    |   |   |   |   |     |   |   |   |   |   |   |   |   |   |   |   |   |   |



Otu0880 0 0 0 0 0 0 0 0 0 0 0 0 0 0 0 0 0 0 0 0 1 0 0 0 0 0 0 0 0  
0 0 0 0 0 0 0 0 0 0 12 0 0 0 0 0 0 0 0 0 0 0 0 0 0 0 0 0 0  
0 0 0 0 0 0 0 0 0 0 0 0 0 0 0 0 0 0 0 0 0 0 0 0 0 0 0 0 0  
0 0 0 0 0 0 0 0 0 0 0 0 0 0 0 0 0 0 0 0 0 0 0 0 0 0 0 0 0  
M02255\_77\_000000000-ADUT3\_1\_2109\_23326\_6892 T---AC---GT-AG-GGT-----GCG-A-G-----C-G--T---T--GT-C-CGG-AT-----TT-A--T-T--GG-GC-----GT-A----AA-GA-GC-TT-----G-TA-G-G-C-G-----G--T-TT-G-T-C-----AC--  
--G-T-C-G-----A-A-A--G--TG--A-AA-AC--C-T-GG-G-C-----CT-T-AA-----T-C-C-C-G-G-G--C-T---T-G--C-T---T-T-----C-GA-T-A--C-----G-G-G--CT--G-A-C---T-G-G-A-G-G--A--A-GG----TA-G-G-----G-G-A-G---AA-C-----GG--A--ATT---C-C-T-G-  
GT--GG-A-G-CG-GT--G---G--A-A---TG-C-GC-AG--AT-A-TC--A-G--G-A-G-G-A-AC-A-CC---GG--T--G--GC-GAA-G--G-C--G-----G--T-T-C-T---CTG--G--AC-C-T-----T-T---C-C-T--GA--CG-C-T-G--A-GA--A-G-CG-A--AA-G-C---G-TG--GG-G--AG-  
C-A-AA-----CA--GG Bacteria(100);Actinobacteria(100);Actinobacteria(100);Actinobacteridae(100);Actinomycetales(100);Propionibacterineae(100);Propionibacteriaceae(100);unclassified(100);unclassified(100);

Otu0881 0 0 0 0 0 0 0 0 0 0 0 0 0 0 0 0 0 0 0 0 1 0 0 0 0 0 0 0 0  
0 0 1 0 0 0 0 0 0 0 7 0 8 0 0 0 0 0 0 0 0 0 0 0 0 48 0 0 0 0  
0 0 0 0 0 0 0 10 0 0 0 12 0 0 0 0 0 0 23 234 73 0 0 0 0 667 0 0 306  
41 0 0 0 0 21 1 18 0 171 5 662 3 28 4 0 34 0 22 0 0 0 0 0 0 0 0  
M02255\_77\_000000000-ADUT3\_1\_1110\_17783\_15269 T---AC---GG-AG-GGT-----GCA-A-G-----C-G--T---T--AA-T-CGG-AA-----TA-A--C-T--GG-GC-----GT-A----AA-GG-GC-AT-----G-CA-G-G-C-G-----G--T-TC-A-T-C-----  
-----AA---G-T-A-G-----G-A-T--G--TG--A-AA-TC--C-C-CG-G-G-----CT-C-AA-----C-C-T-G-G-G-A--A-C---A-G--C-A--T-A-----C--TA-A-A--C-----T-G-G--TG--G-A-C---T-A-G-A-G-T-A--T-TG---CA-G-G-----G-G-G-A--GA-C-----GG--A--ATT---  
C-C-A-G-GT--GT-A-G-CG-GT--G---G--A-A---TG-C-GT-AG--AT-A-TC--T-G--G-A-A-G-A-AC-A-CC---AA-A--G--GC-GAA-G--G-C--A-----G--T-C-T-C---CTG--G--GC-A-A-----A-T---A-C-T--GA--CG-C-T-C--A-TA--T-G-CG-A--AA-G-C---G-TG--GG-  
T--AG-C-A-AA-----CA--GG Bacteria(100);Proteobacteria(100);Gammaproteobacteria(100);Aeromonadales(100);Succinivibrionaceae(100);Succinivibrio(100);unclassified(100);unclassified(100);unclassified(100);

Otu0882 0 0 0 0 0 0 0 0 0 0 0 0 0 0 0 0 0 0 0 0 1 0 0 0 0 0 0 0 0  
0 0 0 0 0 0 0 0 0 0 0 0 0 0 0 0 0 0 0 0 1 7 0 0 0 0 0 0 0  
0 0 0 0 0 0 0 0 0 0 0 0 0 0 0 0 0 0 0 0 0 0 0 0 0 0 0 0 0  
0 0 0 0 0 0 0 0 0 0 0 0 0 0 0 0 0 0 0 0 0 0 0 0 0 0 0 0 0  
M02255\_76\_000000000-ADUNE\_1\_2107\_6475\_4912 C---GT--GC-CA-GCA-----GCC-G-C-----G--G--T---A--AT-A-CGT-AT-----GG-A--G-C--GA-GC-----GTT--G----TC-CG-GA-AT-----T-AT-T-G-C-G-----G--C-GT-A-A-A-----  
GG---G-TAC-G-----C-A-G--G--TT--A-AA-GA--T-C-GG-G-G-----CT-C-AA-----C-C-C-C-G-T-A--A-----A-G--C-A--T-T-----G--GA-A-A--C-----T-G-A--TA--A-A-C---T-T-G-A-G-T--A--G-TG---GA-G-A-----G-G-A-A--AG-T-----GG--A--ATT---C-C-  
T-A-GT--GT-A-G-TG-GT--G---A--A---TA-C-GT-AG--AT-A-TT--A-G--G-A-G-G-A-AT-A-CC---AG--T--A--GC-GAA-G--G-C--G-----A--C-T-T-T---CTG--G--AC-A-C-----A-A---A-C-T--GA--CG-C-T-G--A-GG--T-A-CG-A--AA-G-C---G-TG--GG-G--  
AG-C-A-AA-----CA--GG Bacteria(100);Firmicutes(100);Clostridia(100);Clostridiales(100);Family\_XI\_Incertae\_Sedis(100);Finegoldia(100);unclassified(100);unclassified(100);unclassified(100);

Otu0883 0 0 0 0 0 0 0 0 0 0 0 0 0 0 0 0 0 0 0 0 0 0 0 0 0 0 0 0 0  
0 0 0 0 0 0 0 0 0 0 0 0 0 0 30 69 37 0 0 0 0 0 0 0 0 0 0 0  
0 0 0 0 0 0 0 0 0 0 0 0 0 0 0 0 0 0 0 0 0 0 0 0 0 0 0 0 0  
0 0 0 0 0 0 0 0 0 0 0 0 48 0 12 0 0 0 0 0 0 0 0 0 0 0 0 0  
M02255\_77\_000000000-ADUT3\_1\_1101\_9878\_23086 T---AC---GT-AG-GGG-----GCT-A-G-----C-G--T---T--AT-C-CGG-AT-----TT-A--C-T--GG-GC-----GT-A----AA-GG-GT-GC-----G-TA-G-G-C-G-----G--T-CT-T-T-C-----AA--  
--G-T-C-A-----G-G-A--G--TT--A-AA-GG--C-T-AC-G-G-----CT-C-AA-----C-C-G-T-A-G-T--A-----A-G--C-T---C-C-----T--GA-T-A--C-----T--G-T--CT--G-A-C---T-T-G-A-G-T--G---C-AG---GA-G-A-----G-G-A-A--AG-C-----GG--A--ATT---C-C-C-A-  
GT--GT-A-G-CG-GT--G---A--A---TG-C-GT-AG--AT-A-TT--G-G--G-A-G-G-A-AC-A-CC---AG--T--A--GC-GAA-G--G-C--G-----G--C-T-T-T---CTG--G--AC-T-G-----T-A---A-C-T--GA--CG-C-T-G--A-GG--C-A-CG-A--AA-G-C---G-TG--GG-G--AG-  
C-A-AA-----CA--GG Bacteria(100);Firmicutes(100);Clostridia(100);Clostridiales(100);Peptostreptococcaceae(100);unclassified(100);unclassified(100);unclassified(100);unclassified(100);

Otu0884 0 0 0 0 0 0 0 0 0 0 0 0 0 0 0 0 0 0 0 0 0 0 0 0 0 0 0 0 0  
0 0 0 0 0 0 0 0 0 0 0 0 35 0 0 0 0 0 0 0 0 0 0 0 0 0 0 0  
0 0 0 0 0 0 0 0 0 0 0 0 0 0 0 0 0 0 0 0 0 0 0 0 0 0 0 0 0  
0 0 0 0 0 0 0 0 0 0 0 0 0 0 0 0 0 0 0 0 0 0 0 5 0 0  
M02255\_77\_000000000-ADUT3\_1\_1110\_10390\_16595 T---AC---GT-AG-GGA-----GCA-A-G-----C-G--T---T--GT-T-CGG-AT-----TT-A--C-T--GG-GC-----GT-A----AA-GG-GC-GC-----G-TA-G-G-C-G-----G--C-GT-G-T-T-----  
-----AA---G-T-C-A-----G-C-T--G--TG--A-AA-TC--T-C-CA-A-G-----CT-C-AA-----C-T-T-G-G-A-A--C-G---G-C--C-A--G--C-----T--GA-T-A--C-----T--G-A--TG--T-G-C---T-A-G-A-G-T--G---C-AG---AA-G-G-----G-G-C-A--AT-C-----GG--A--ATT---C-  
T-T-G-GT--GT-A-G-CG-GT--G---A--A---TG-C-GT-AG--AT-A-TC--A-A--G-A-G-G-A-AC-A-CC---TG--A--G--GT-GAA-G--A-C--G-----G--G-T-T-G---CTG--G--GC-T-G-----A-C---A-C-T--GA--CG-C-T-G--A-GG--C-G-CG-A--AA-G-C---C-AG--GG-  
G--AG-C-A-AA-----CG--GG Bacteria(100);Acidobacteria(100);Acidobacteria(100);Acidobacteriales(100);Acidobacteriaceae(100);Candidatus\_Chloroacidobacterium(100);unclassified(100);unclassified(100);unclassified(100);



|                                              |                                                                                                                                                                                                                         |   |   |   |    |   |   |   |    |   |   |   |   |   |    |   |   |   |   |    |   |   |    |    |    |   |  |  |
|----------------------------------------------|-------------------------------------------------------------------------------------------------------------------------------------------------------------------------------------------------------------------------|---|---|---|----|---|---|---|----|---|---|---|---|---|----|---|---|---|---|----|---|---|----|----|----|---|--|--|
| Otu0885                                      | 0                                                                                                                                                                                                                       | 0 | 0 | 0 | 0  | 0 | 0 | 0 | 0  | 0 | 0 | 0 | 0 | 0 | 0  | 0 | 0 | 0 | 0 | 0  | 0 | 0 | 0  | 0  | 0  | 0 |  |  |
|                                              | 0                                                                                                                                                                                                                       | 0 | 0 | 0 | 0  | 0 | 0 | 0 | 0  | 0 | 0 | 0 | 0 | 0 | 17 | 0 | 0 | 0 | 0 | 0  | 0 | 0 | 0  | 0  | 0  | 0 |  |  |
|                                              | 0                                                                                                                                                                                                                       | 0 | 0 | 0 | 0  | 0 | 0 | 0 | 0  | 0 | 0 | 0 | 0 | 0 | 0  | 0 | 0 | 0 | 0 | 0  | 0 | 0 | 0  | 0  | 0  | 0 |  |  |
|                                              | 0                                                                                                                                                                                                                       | 0 | 0 | 0 | 0  | 0 | 0 | 0 | 0  | 0 | 0 | 0 | 0 | 0 | 0  | 0 | 0 | 0 | 0 | 0  | 0 | 0 | 0  | 0  | 0  | 0 |  |  |
| M02255_76_000000000-ADUNE_1_1113_17346_25056 | C---TA--AC-TC-CGT-----GCC-A-G----C---A--G--CC-G-CGG-TA-----AT-A--C-G--GA-GG-----GT-G----CA--A-GC-G-----T-TA-A-T-C-G-----G--A-TT-G-G-T-----                                                                              |   |   |   |    |   |   |   |    |   |   |   |   |   |    |   |   |   |   |    |   |   |    |    |    |   |  |  |
|                                              | ---CA---G-T-C-A-----G-A-T-G--TG--A-AA-GC--C-C-TC-G-G-----CT-T-AA-----C-C-G-G-G-G-A--A-C---T-G--C-A---T-T-----T--GA-T-A--C-----T-G-C--CA--G-G-C---T-T-G-A-G-T-G--T-CG----GA-G-A-----G-G-G-T--GG-C-----GG--A--ATT---C-C-  |   |   |   |    |   |   |   |    |   |   |   |   |   |    |   |   |   |   |    |   |   |    |    |    |   |  |  |
|                                              | A-G-GT--GT-A-G-GA-GT--G---A--A---TC-C-GT-AG--AT-A-TC--T-G--G-A-G-G-A-AC-A-CC--AG--T-G--GC-GAA-G--G-C--G-----G--C-C-A-C---CTG--G--AC-G-A-----C-A--A-C-T-GA--CG-C-T-G--A-GG--A-G-CG-A-AA-G-C--G-TG--GG-T--                |   |   |   |    |   |   |   |    |   |   |   |   |   |    |   |   |   |   |    |   |   |    |    |    |   |  |  |
|                                              | AG-C-A-AA-----CA--GG                                                                                                                                                                                                    |   |   |   |    |   |   |   |    |   |   |   |   |   |    |   |   |   |   |    |   |   |    |    |    |   |  |  |
|                                              | Bacteria(100);Proteobacteria(100);Deltaproteobacteria(100);Desulfovibrionales(100);Desulfovibrionaceae(100);unclassified(100);unclassified(100);unclassified(100);unclassified(100);                                    |   |   |   |    |   |   |   |    |   |   |   |   |   |    |   |   |   |   |    |   |   |    |    |    |   |  |  |
| Otu0886                                      | 0                                                                                                                                                                                                                       | 0 | 0 | 0 | 0  | 0 | 0 | 0 | 0  | 0 | 0 | 0 | 0 | 0 | 0  | 0 | 0 | 0 | 0 | 0  | 0 | 0 | 0  | 0  | 0  | 0 |  |  |
|                                              | 0                                                                                                                                                                                                                       | 0 | 0 | 0 | 0  | 0 | 0 | 0 | 0  | 0 | 0 | 0 | 0 | 0 | 0  | 5 | 5 | 0 | 0 | 0  | 0 | 0 | 0  | 0  | 0  | 0 |  |  |
|                                              | 0                                                                                                                                                                                                                       | 0 | 0 | 0 | 0  | 0 | 0 | 0 | 0  | 0 | 0 | 0 | 0 | 0 | 0  | 0 | 0 | 0 | 0 | 0  | 0 | 0 | 0  | 0  | 0  | 0 |  |  |
|                                              | 0                                                                                                                                                                                                                       | 0 | 0 | 0 | 0  | 0 | 0 | 0 | 0  | 0 | 0 | 0 | 0 | 0 | 0  | 0 | 0 | 0 | 0 | 0  | 0 | 0 | 0  | 0  | 0  | 0 |  |  |
| M02255_76_000000000-ADUNE_1_1106_15785_17092 | C---ACG--GC-TA-ACT-----ACG-T-G----C--C--A--G--CA-G-CCG-CG-----GT-A--A-T--AC-GT-----AG--G----TG-GC-AA-GC-----G-TT-G-T-C-C-----G--G-AT-G-A-T-----                                                                         |   |   |   |    |   |   |   |    |   |   |   |   |   |    |   |   |   |   |    |   |   |    |    |    |   |  |  |
|                                              | -----AA---G-T-C-T-----G-A-T-G--TG--A-AA-GC--C-C-AC-G-G-----CT-C-AA-----C-C-G-T-G-G-A--A-C---T-G--C-A---T-C-----G--GA-A-A--C-----T-G-T--CA--T-T-C---T-T-G-A-G-T-G--C-AG----AA-G-A-----G-G-A-G--AG-T-----GG--A--ATT---C-  |   |   |   |    |   |   |   |    |   |   |   |   |   |    |   |   |   |   |    |   |   |    |    |    |   |  |  |
|                                              | C-A-T-GT--GT-A-G-CG-GT--G---G--A-A---TG-C-GT-AG--AT-A-TA--T-G--G-A-A-G-A-AC-A-CC--AG--T-G--GC-GAA-G--G-C--G-----G--C-T-C-T---CTG--G--TC-T-G-----C-A--A-C-T-GA--CG-C-T-G--A-GG--C-T-CG-A-AA-G-C--A-TG--GG-T--            |   |   |   |    |   |   |   |    |   |   |   |   |   |    |   |   |   |   |    |   |   |    |    |    |   |  |  |
|                                              | AG-C-G-AA-----CA--GG                                                                                                                                                                                                    |   |   |   |    |   |   |   |    |   |   |   |   |   |    |   |   |   |   |    |   |   |    |    |    |   |  |  |
|                                              | Bacteria(100);Firmicutes(100);Bacilli(100);Lactobacillales(100);unclassified(100);unclassified(100);unclassified(100);unclassified(100);unclassified(100);                                                              |   |   |   |    |   |   |   |    |   |   |   |   |   |    |   |   |   |   |    |   |   |    |    |    |   |  |  |
| Otu0887                                      | 0                                                                                                                                                                                                                       | 0 | 0 | 0 | 0  | 0 | 0 | 0 | 0  | 0 | 0 | 0 | 0 | 0 | 0  | 0 | 0 | 0 | 0 | 0  | 0 | 0 | 0  | 0  | 0  | 0 |  |  |
|                                              | 0                                                                                                                                                                                                                       | 0 | 0 | 0 | 0  | 0 | 0 | 0 | 0  | 0 | 0 | 0 | 2 | 0 | 0  | 0 | 0 | 0 | 0 | 0  | 0 | 0 | 0  | 0  | 0  | 0 |  |  |
|                                              | 0                                                                                                                                                                                                                       | 0 | 0 | 0 | 0  | 0 | 0 | 0 | 0  | 0 | 0 | 0 | 2 | 0 | 0  | 0 | 0 | 0 | 0 | 0  | 0 | 0 | 0  | 0  | 0  | 6 |  |  |
|                                              | 0                                                                                                                                                                                                                       | 0 | 0 | 0 | 0  | 0 | 0 | 0 | 0  | 0 | 0 | 0 | 0 | 0 | 0  | 0 | 0 | 0 | 0 | 0  | 0 | 0 | 0  | 0  | 0  | 0 |  |  |
| M02255_76_000000000-ADUNE_1_2112_28395_18425 | T---CG--GC-TA-ACT-----CCG-T-GC----C--A--G--C--AG-C-CGC-GG-----TA-A--T-A--CG-GA-----GG--A----TC-CG-AG-CG-----T-TA-T-C-C-G-----G--C-AC-T-T-T-----                                                                         |   |   |   |    |   |   |   |    |   |   |   |   |   |    |   |   |   |   |    |   |   |    |    |    |   |  |  |
|                                              | -----AA---G-T-C-A-----G-G-G--G--TG--A-AA-GA--C-G-GC-A-G-----CT-C-AA-----C-T-G-T-C-G-C--A-G---T-G--C-C--C-T-----T--GA-T-A--C-----T--G-A--AG--T-G-C---T-T-G-A-A-T--G--C-GG---TT-G-A-----A-G-A-C--GG-C-----GG--A--ATG---A- |   |   |   |    |   |   |   |    |   |   |   |   |   |    |   |   |   |   |    |   |   |    |    |    |   |  |  |
|                                              | G-A-C-AA--GT-A-G-CG-GT--G---A--A---TG-C-AT-AG--AT-A-TG--T-C--T-C-A-G-A-AC-A-CC--GA--T--T--GC-GAA-G--G-C--A-----G--C-T-G-T---CTA--A--GC-C-G-----T-T--A-T-T--GA--CG-C-T-G--A-TG--C-A-CG-A-AA-G-C--G-TG--GG-G--            |   |   |   |    |   |   |   |    |   |   |   |   |   |    |   |   |   |   |    |   |   |    |    |    |   |  |  |
|                                              | AT-C-G-AA-----CA--GG                                                                                                                                                                                                    |   |   |   |    |   |   |   |    |   |   |   |   |   |    |   |   |   |   |    |   |   |    |    |    |   |  |  |
|                                              | Bacteria(100);Bacteroidetes(100);Sphingobacteria(100);Sphingobacteriales(100);Sphingobacteriaceae(100);Sphingobacteriaceae(100);Sphingobacterium(100);unclassified(100);unclassified(100);                              |   |   |   |    |   |   |   |    |   |   |   |   |   |    |   |   |   |   |    |   |   |    |    |    |   |  |  |
| Otu0888                                      | 0                                                                                                                                                                                                                       | 0 | 0 | 0 | 0  | 0 | 0 | 0 | 0  | 0 | 0 | 0 | 0 | 0 | 0  | 0 | 0 | 0 | 1 | 10 | 0 | 0 | 0  | 11 | 0  | 0 |  |  |
|                                              | 0                                                                                                                                                                                                                       | 2 | 0 | 0 | 0  | 0 | 0 | 0 | 27 | 0 | 0 | 0 | 0 | 0 | 0  | 0 | 0 | 0 | 0 | 0  | 0 | 0 | 0  | 0  | 0  | 0 |  |  |
|                                              | 0                                                                                                                                                                                                                       | 0 | 0 | 0 | 0  | 0 | 0 | 0 | 0  | 0 | 0 | 0 | 0 | 0 | 0  | 0 | 0 | 0 | 0 | 0  | 0 | 0 | 50 | 0  | 0  | 0 |  |  |
|                                              | 0                                                                                                                                                                                                                       | 0 | 0 | 0 | 17 | 0 | 0 | 0 | 0  | 0 | 0 | 0 | 0 | 0 | 0  | 0 | 0 | 0 | 0 | 0  | 0 | 0 | 0  | 0  | 41 | 0 |  |  |
| M02255_77_000000000-ADUT3_1_1117_22532_19561 | G---AC--GG-AG-GAG-----GCT-A-G----C--G--T---T--GT-T-CGG-AA-----TT-A--C-T--GG-GC-----GT--A----AA-GC-GC-GC-----G-CA-G-G-C-G-----G--C-TT-A-G-C-----                                                                         |   |   |   |    |   |   |   |    |   |   |   |   |   |    |   |   |   |   |    |   |   |    |    |    |   |  |  |
|                                              | -----AA---G-T-C-A-----G-G-G--G--TG--A-AA-GC--C-C-GG-G-G-----CT-C-AA-----C-C-T-C-G-G-A--A-C---T-G--C-C--T-T-----T--GA-G-A--C-----T--G-C--TA--G-G-C---T-C-G-A-G-A--C--C-GA---GA-G-A-----G-G-A-G--AG-T-----GG--A--ATT---   |   |   |   |    |   |   |   |    |   |   |   |   |   |    |   |   |   |   |    |   |   |    |    |    |   |  |  |
|                                              | C-C-C-A-GT--GT-A-G-AG-GT--G---A--A---TT-C-GT-AG--AT-A-TT--G-G--G-A-A-G-A-AC-A-CC--AG--T-G--GC-GAA-G--G-C--G-----G--C-T-C-T---CTG--G--CT-C-G-----G-T---A-C-T--GA--CG-C-T-G--A-GG--C-G-CG-A-AA-G-C--G-TG--GG-G--          |   |   |   |    |   |   |   |    |   |   |   |   |   |    |   |   |   |   |    |   |   |    |    |    |   |  |  |
|                                              | G--AG-C-A-AA-----CA--GG                                                                                                                                                                                                 |   |   |   |    |   |   |   |    |   |   |   |   |   |    |   |   |   |   |    |   |   |    |    |    |   |  |  |
|                                              | Bacteria(100);Proteobacteria(100);Alphaproteobacteria(100);unclassified(100);unclassified(100);unclassified(100);unclassified(100);unclassified(100);unclassified(100);                                                 |   |   |   |    |   |   |   |    |   |   |   |   |   |    |   |   |   |   |    |   |   |    |    |    |   |  |  |
| Otu0889                                      | 0                                                                                                                                                                                                                       | 0 | 0 | 0 | 0  | 0 | 0 | 0 | 0  | 0 | 0 | 0 | 0 | 0 | 0  | 0 | 0 | 0 | 1 | 0  | 0 | 0 | 4  | 0  | 0  | 5 |  |  |
|                                              | 0                                                                                                                                                                                                                       | 0 | 0 | 0 | 0  | 0 | 0 | 0 | 0  | 0 | 0 | 0 | 0 | 0 | 0  | 0 | 0 | 0 | 0 | 0  | 0 | 0 | 0  | 0  | 0  | 0 |  |  |
|                                              | 0                                                                                                                                                                                                                       | 0 | 0 | 0 | 0  | 0 | 0 | 0 | 0  | 0 | 0 | 0 | 0 | 0 | 0  | 0 | 0 | 0 | 0 | 0  | 0 | 0 | 0  | 0  | 0  | 0 |  |  |
|                                              | 0                                                                                                                                                                                                                       | 0 | 0 | 0 | 0  | 0 | 0 | 0 | 0  | 0 | 0 | 0 | 0 | 0 | 0  | 0 | 0 | 0 | 0 | 0  | 0 | 0 | 0  | 0  | 0  | 0 |  |  |
| M02255_76_000000000-ADUNE_1_2115_6530_20338  | C---GG--CT-AA-CTC-----CGT-G-C----C--A--G--C--AG-C-CGC-GG-----TA-A--T-A--CG-GA-----GG--A----TC-CA-AG-CG-----T-TA-T-C-C-G-----GA-C-CC-T-G-T-----AA-                                                                       |   |   |   |    |   |   |   |    |   |   |   |   |   |    |   |   |   |   |    |   |   |    |    |    |   |  |  |
|                                              | ---G-T-C-A-----G-C-G--G--TG--A-AA-TC--T-C-CC-G-G-----CT-C-AA-----C-C-G-G-G-A-A--A-T---G-G--C-C--G--T-----T--GA-T-A--C-----T--G-C--AG--G-G-C---T-T-G-A-A-T--T--A-GT---AG-G-A-----A-G-T-A--AC-T-----AG--A--ATA---T-G-T-A- |   |   |   |    |   |   |   |    |   |   |   |   |   |    |   |   |   |   |    |   |   |    |    |    |   |  |  |
|                                              | GT--GT-A-G-CG-GT--G---A--A---TG-C-TT-AG--AG-A-TT--A-C--A-T-G-G-A-AT-A-CC--AA--T--T--GC-GAA-G--G-C--A-----G--G-T-T-A--CTA--C--TA-C-T-----A-T---A-T-T--GA--CG-C-T-G--A-GG--G-A-CG-A-AA-G-C--G-TG--GG-T--AG-C-             |   |   |   |    |   |   |   |    |   |   |   |   |   |    |   |   |   |   |    |   |   |    |    |    |   |  |  |
|                                              | G-AA-----CA--GG                                                                                                                                                                                                         |   |   |   |    |   |   |   |    |   |   |   |   |   |    |   |   |   |   |    |   |   |    |    |    |   |  |  |
|                                              | Bacteria(100);Bacteroidetes(100);Flavobacteria(100);Flavobacteriales(100);Flavobacteriaceae(100);unclassified(100);unclassified(100);unclassified(100);unclassified(100);                                               |   |   |   |    |   |   |   |    |   |   |   |   |   |    |   |   |   |   |    |   |   |    |    |    |   |  |  |



[illegible]



[illegible]



[illegible]



|                                                                                                                                                                                                                                |   |   |   |   |   |   |     |                                                                                                                                                    |   |   |   |   |   |   |   |   |   |   |   |   |   |   |   |   |   |    |   |  |  |  |  |  |  |  |
|--------------------------------------------------------------------------------------------------------------------------------------------------------------------------------------------------------------------------------|---|---|---|---|---|---|-----|----------------------------------------------------------------------------------------------------------------------------------------------------|---|---|---|---|---|---|---|---|---|---|---|---|---|---|---|---|---|----|---|--|--|--|--|--|--|--|
| Otu0905                                                                                                                                                                                                                        | 0 | 0 | 0 | 0 | 0 | 0 | 0   | 0                                                                                                                                                  | 0 | 0 | 0 | 0 | 0 | 0 | 0 | 0 | 0 | 0 | 0 | 0 | 0 | 0 | 0 | 0 | 0 | 0  | 0 |  |  |  |  |  |  |  |
|                                                                                                                                                                                                                                | 0 | 0 | 0 | 0 | 0 | 0 | 41  | 0                                                                                                                                                  | 0 | 0 | 0 | 0 | 0 | 0 | 0 | 0 | 0 | 0 | 0 | 0 | 0 | 0 | 0 | 0 | 0 | 0  | 0 |  |  |  |  |  |  |  |
|                                                                                                                                                                                                                                | 0 | 0 | 0 | 0 | 0 | 0 | 0   | 0                                                                                                                                                  | 0 | 0 | 0 | 0 | 0 | 0 | 0 | 0 | 0 | 0 | 0 | 0 | 0 | 0 | 0 | 0 | 0 | 0  | 0 |  |  |  |  |  |  |  |
|                                                                                                                                                                                                                                | 0 | 0 | 0 | 0 | 0 | 0 | 0   | 0                                                                                                                                                  | 0 | 0 | 0 | 0 | 0 | 0 | 0 | 0 | 0 | 0 | 0 | 0 | 0 | 0 | 0 | 0 | 0 | 0  | 0 |  |  |  |  |  |  |  |
| M02255_76_000000000-ADUNE_1_1105_26108_17627                                                                                                                                                                                   |   |   |   |   |   |   |     | C---GG---CT-AA-TTC-----CGT-G-C-----C--A--G---C--AG-C-CGC-GG-----TA-A--TAC--GG-AA-----GG--G---GC-AA-GC-GT-----TG-T-T-C-G-----G--T-CG-C-G-T-----     |   |   |   |   |   |   |   |   |   |   |   |   |   |   |   |   |   |    |   |  |  |  |  |  |  |  |
| -----AT---G-T-C-T-----G-C-T--G--TG--A-AA-GC--A-C-AC-G-G----CT-T-AA-----C-T-G-T-G-T-G---A---A-GT-C-G--G--T-----A--GA-A-A--C-----T--G-C-GA--G-A-C---T-T-G-A-G-G--C--T-GG-----GA-G-A-----G-G-T-T---GG-T-----GG--A--ATT----        |   |   |   |   |   |   |     |                                                                                                                                                    |   |   |   |   |   |   |   |   |   |   |   |   |   |   |   |   |   |    |   |  |  |  |  |  |  |  |
| C-C-C-T-GT--GT-A-G-CG-GT--G---A--A-A---TG-C-GT-AG--AT-A-TA--G-G--G-G-A-G-A-AC-A-CT---CG--T--G--GC-GAA-G--G-C--G-----G--C-C-A-G---CTG--G--AC-C-A-----G-C---C-C-T--GA--CG-C-T-G--A-GG--C-G-CG-A--CA-G-C---G-TG--                 |   |   |   |   |   |   |     |                                                                                                                                                    |   |   |   |   |   |   |   |   |   |   |   |   |   |   |   |   |   |    |   |  |  |  |  |  |  |  |
| GG-G--AG-C-A-AA-----CA--GG Bacteria(100);unclassified(100);unclassified(100);unclassified(100);unclassified(100);unclassified(100);unclassified(100);unclassified(100);unclassified(100);                                      |   |   |   |   |   |   |     |                                                                                                                                                    |   |   |   |   |   |   |   |   |   |   |   |   |   |   |   |   |   |    |   |  |  |  |  |  |  |  |
| Otu0906                                                                                                                                                                                                                        | 0 | 0 | 0 | 0 | 0 | 0 | 0   | 0                                                                                                                                                  | 0 | 0 | 0 | 0 | 0 | 0 | 0 | 0 | 0 | 0 | 0 | 0 | 0 | 0 | 0 | 0 | 0 | 0  | 0 |  |  |  |  |  |  |  |
|                                                                                                                                                                                                                                | 0 | 0 | 0 | 0 | 0 | 0 | 163 | 0                                                                                                                                                  | 0 | 0 | 0 | 0 | 0 | 0 | 0 | 0 | 0 | 0 | 0 | 0 | 0 | 0 | 0 | 0 | 0 | 0  | 0 |  |  |  |  |  |  |  |
|                                                                                                                                                                                                                                | 0 | 0 | 0 | 0 | 0 | 0 | 0   | 0                                                                                                                                                  | 0 | 0 | 0 | 0 | 0 | 0 | 0 | 0 | 0 | 0 | 0 | 0 | 0 | 0 | 0 | 0 | 0 | 0  | 0 |  |  |  |  |  |  |  |
|                                                                                                                                                                                                                                | 0 | 0 | 0 | 0 | 0 | 0 | 0   | 0                                                                                                                                                  | 0 | 0 | 0 | 0 | 0 | 0 | 0 | 0 | 0 | 0 | 0 | 0 | 0 | 0 | 0 | 0 | 0 | 0  | 0 |  |  |  |  |  |  |  |
| M02255_76_000000000-ADUNE_1_1104_21714_16964                                                                                                                                                                                   |   |   |   |   |   |   |     | T---AC---GT-AG-GCG-----GCA-A-G-----C--G--T---T--AC-C-CGG-AT-----TT-A--T-T--GG-GC-----GT--A---AA-GC-GT-GC-----G-CA-G-G-C-G-----G--T-TT-T-G-A-----   |   |   |   |   |   |   |   |   |   |   |   |   |   |   |   |   |   |    |   |  |  |  |  |  |  |  |
| -----AA---G-T-C-A-----T-C-A--T--TG--A-AA-TC--T-T-GG-G-G----CT-C-AA-----C-C-C-C-A-A-G--C-C---T-G--G-T---G--G-----T--GA-T-A--C-----T--T-C--AA--G-A-C---T-A-G-G-T-T--G---T-TT-----GA-G-G-----G-G-G-T--AC-C-----GG--A--ACA---G-    |   |   |   |   |   |   |     |                                                                                                                                                    |   |   |   |   |   |   |   |   |   |   |   |   |   |   |   |   |   |    |   |  |  |  |  |  |  |  |
| T-T-G-GT--GG-A-G-CA-GT--G---A--A-A---TG-C-GT-TG--AT-A-TC--A-A--C-T-G-G-A-AC-A-CC---AA--A--G--GC-GAA-G--G-C--A-----G--G-T-A-C---CTG--G--CA-A-A-----C-T---A-A-C--GA--CG-C-T-G--T-TG--C-A-CG-A--AA-G-C---G-TG--GG-G--             |   |   |   |   |   |   |     |                                                                                                                                                    |   |   |   |   |   |   |   |   |   |   |   |   |   |   |   |   |   |    |   |  |  |  |  |  |  |  |
| -AG-C-A-AA-----AC--GG Bacteria(100);unclassified(100);unclassified(100);unclassified(100);unclassified(100);unclassified(100);unclassified(100);unclassified(100);unclassified(100);                                           |   |   |   |   |   |   |     |                                                                                                                                                    |   |   |   |   |   |   |   |   |   |   |   |   |   |   |   |   |   |    |   |  |  |  |  |  |  |  |
| Otu0907                                                                                                                                                                                                                        | 0 | 0 | 0 | 0 | 0 | 0 | 0   | 0                                                                                                                                                  | 0 | 0 | 0 | 0 | 0 | 0 | 0 | 0 | 0 | 0 | 0 | 0 | 0 | 0 | 0 | 0 | 0 | 0  | 0 |  |  |  |  |  |  |  |
|                                                                                                                                                                                                                                | 1 | 0 | 0 | 0 | 0 | 0 | 2   | 0                                                                                                                                                  | 0 | 0 | 0 | 0 | 0 | 0 | 0 | 0 | 0 | 0 | 0 | 0 | 0 | 0 | 0 | 0 | 0 | 20 | 0 |  |  |  |  |  |  |  |
|                                                                                                                                                                                                                                | 0 | 0 | 0 | 0 | 0 | 0 | 0   | 0                                                                                                                                                  | 0 | 0 | 0 | 0 | 0 | 0 | 0 | 0 | 0 | 0 | 0 | 0 | 0 | 0 | 0 | 0 | 0 | 0  | 0 |  |  |  |  |  |  |  |
|                                                                                                                                                                                                                                | 0 | 0 | 0 | 0 | 0 | 0 | 0   | 0                                                                                                                                                  | 0 | 0 | 0 | 0 | 0 | 0 | 0 | 0 | 0 | 0 | 0 | 0 | 0 | 0 | 0 | 0 | 0 | 0  | 0 |  |  |  |  |  |  |  |
| M02255_76_000000000-ADUNE_1_2111_25601_17402                                                                                                                                                                                   |   |   |   |   |   |   |     | C---TA---AC-TC-CGT-----GCC-A-G-----C--A--G---C--CG-C-GGT-AA-----TA-C--G-G--AG-GG-----TG--C---AA-GC-GT-TA-----T-CC-G-GAT-T-----T--A-TT-T-G-T-----   |   |   |   |   |   |   |   |   |   |   |   |   |   |   |   |   |   |    |   |  |  |  |  |  |  |  |
| -----AA---G-T-C-A-----G-T-G--G--TG--A-AA-TC--T-C-AC-A-G-----CT-T-AA-----C-T-G-T-G-A-A--A-C---T-G--C-C---A--T-----T--GA-T-A--C-----T--G-C--AA--G-T-C---T-T-G-A-G-T--G---T-TG-----TT-G-A-----A-G-T-A--GC-T-----GG--A--ATA---A-G- |   |   |   |   |   |   |     |                                                                                                                                                    |   |   |   |   |   |   |   |   |   |   |   |   |   |   |   |   |   |    |   |  |  |  |  |  |  |  |
| T-A-GT--GT-A-G-CG-GT--G---A--A-A---TT-C-GT-AG--AT-A-TT--A-C--T-T-A-G-A-AC-A-CC---AA--T--T--GC-GAA-G--G-C--A-----G--G-T-T-A---CTA--A--GC-A-A-----C-A---A-C-T--GA--CG-C-T-G--A-TG--G-A-CG-A--AA-G-C---G-TG--GG-G--               |   |   |   |   |   |   |     |                                                                                                                                                    |   |   |   |   |   |   |   |   |   |   |   |   |   |   |   |   |   |    |   |  |  |  |  |  |  |  |
| AG-C-G-AA-----CA--GG Bacteria(100);Bacteroidetes(100);Flavobacteria(100);Flavobacteriales(100);Flavobacteriaceae(100);Chryseobacterium(100);unclassified(100);unclassified(100);unclassified(100);                             |   |   |   |   |   |   |     |                                                                                                                                                    |   |   |   |   |   |   |   |   |   |   |   |   |   |   |   |   |   |    |   |  |  |  |  |  |  |  |
| Otu0908                                                                                                                                                                                                                        | 0 | 0 | 0 | 0 | 0 | 0 | 0   | 0                                                                                                                                                  | 0 | 0 | 0 | 0 | 0 | 0 | 0 | 0 | 0 | 0 | 0 | 0 | 0 | 0 | 0 | 0 | 0 | 0  | 0 |  |  |  |  |  |  |  |
|                                                                                                                                                                                                                                | 0 | 0 | 0 | 0 | 0 | 0 | 17  | 0                                                                                                                                                  | 0 | 0 | 0 | 0 | 0 | 0 | 0 | 0 | 0 | 0 | 0 | 0 | 0 | 0 | 0 | 0 | 0 | 0  | 0 |  |  |  |  |  |  |  |
|                                                                                                                                                                                                                                | 0 | 0 | 0 | 0 | 0 | 0 | 0   | 0                                                                                                                                                  | 0 | 0 | 0 | 0 | 0 | 0 | 0 | 0 | 0 | 0 | 0 | 0 | 0 | 0 | 0 | 0 | 0 | 0  | 0 |  |  |  |  |  |  |  |
|                                                                                                                                                                                                                                | 0 | 0 | 0 | 0 | 0 | 0 | 0   | 0                                                                                                                                                  | 0 | 0 | 0 | 0 | 0 | 0 | 0 | 0 | 0 | 0 | 0 | 0 | 0 | 0 | 0 | 0 | 0 | 0  | 0 |  |  |  |  |  |  |  |
| M02255_76_000000000-ADUNE_1_1103_23005_13506                                                                                                                                                                                   |   |   |   |   |   |   |     | C---CG---GC-TA-ACT-----TCG-T-G-----C--C--A---G--CA-G-CCG-CG-----GT-A--A-T--AC-GA-----AG--G-----GT-GC-AA-AC-----G-TT-GCT-C-G-----G--C-AT-T-G-C----- |   |   |   |   |   |   |   |   |   |   |   |   |   |   |   |   |   |    |   |  |  |  |  |  |  |  |
| -----AA---G-T-C-G-----G-A-T--G--TG--A-AA-TC--C-C-TC-G-G----CT-T-AA-----C-C-A-A-G-G-A--A-G---T-G--C-A--T--C-----C--GA-A-A--C-----T--G-C--CG--T-G-C---T-T-G-A-G-T--A---C-TT-----AA-G-A-----G-G-A-T---CG-C-----GG--A--ATT---C-    |   |   |   |   |   |   |     |                                                                                                                                                    |   |   |   |   |   |   |   |   |   |   |   |   |   |   |   |   |   |    |   |  |  |  |  |  |  |  |
| C-C-G-GT--GT-A-G-AG-GT--G---A--A-A---TT-C-GT-AG--AT-A-TC--G-G--G-A-G-G-A-AC-A-CC---AG--T--G--GC-GAA-G--G-C--G-----G--C-G-A-T---CTG--G--GA-A-G-----A-T---A-C-T--GA--CG-C-T-G--A-GG--T-G-CG-A--AA-G-C---G-TG--GG-                |   |   |   |   |   |   |     |                                                                                                                                                    |   |   |   |   |   |   |   |   |   |   |   |   |   |   |   |   |   |    |   |  |  |  |  |  |  |  |
| G--AG-C-A-AA-----CA--GG Bacteria(100);Proteobacteria(100);Deltaproteobacteria(100);Myxococcales(100);Nannocystineae(100);Haliangiaceae(100);Haliangium(100);unclassified(100);unclassified(100);                               |   |   |   |   |   |   |     |                                                                                                                                                    |   |   |   |   |   |   |   |   |   |   |   |   |   |   |   |   |   |    |   |  |  |  |  |  |  |  |
| Otu0909                                                                                                                                                                                                                        | 0 | 0 | 0 | 0 | 0 | 0 | 0   | 0                                                                                                                                                  | 0 | 0 | 0 | 0 | 0 | 0 | 0 | 0 | 0 | 0 | 0 | 0 | 0 | 0 | 0 | 0 | 0 | 0  | 0 |  |  |  |  |  |  |  |
|                                                                                                                                                                                                                                | 0 | 0 | 0 | 0 | 0 | 0 | 20  | 0                                                                                                                                                  | 0 | 0 | 0 | 0 | 0 | 0 | 0 | 0 | 0 | 0 | 0 | 0 | 0 | 0 | 0 | 0 | 0 | 0  | 0 |  |  |  |  |  |  |  |
|                                                                                                                                                                                                                                | 0 | 0 | 0 | 0 | 0 | 0 | 0   | 0                                                                                                                                                  | 0 | 0 | 0 | 0 | 0 | 0 | 0 | 0 | 0 | 0 | 0 | 0 | 0 | 0 | 0 | 0 | 0 | 0  | 0 |  |  |  |  |  |  |  |
|                                                                                                                                                                                                                                | 0 | 0 | 0 | 0 | 0 | 0 | 0   | 0                                                                                                                                                  | 0 | 0 | 0 | 0 | 0 | 0 | 0 | 0 | 0 | 0 | 0 | 0 | 0 | 0 | 0 | 0 | 0 | 0  | 0 |  |  |  |  |  |  |  |
| M02255_77_000000000-ADUT3_1_1101_23575_14385                                                                                                                                                                                   |   |   |   |   |   |   |     | A----AC---GT-AG-GAG-----GCG-A-G-----C--G--T---T--AT-C-CGG-AG-----TT-A--C-T--GG-GC-----GT--A---AA-GC-GT-GC-----G-TA-G-G-C-G-----G--G-TC-G-G-T---    |   |   |   |   |   |   |   |   |   |   |   |   |   |   |   |   |   |    |   |  |  |  |  |  |  |  |
| -----AA---G-T-G-G-----G-T-C--G--TG--A-AA-GC--G-C-CG-G-G----CT-A-AA-----C-C-G-G-G-C-G--A-G---G-A--C-G--A--A-----C--TA-G-A--C-----T--G-C--CG--G-T-C---T-A-G-A-G-G--C---G-GA-----TA-G-A-----G-G-G-G---TG-C-----GG--A--ATT---      |   |   |   |   |   |   |     |                                                                                                                                                    |   |   |   |   |   |   |   |   |   |   |   |   |   |   |   |   |   |    |   |  |  |  |  |  |  |  |
| --C-C-G-G-GT--GT-A-G-CG-GT--G---A--A-A---TG-T-GT-AG--AG-A-TC--C-G--G-A-G-G-A-AC-A-CC---AG--T--G--GT-GCA-A--A-C-G-----G--C-G-C-C---CTG--G--GT-C-C-----G-A---A-C-T--GA--CG-C-T-G--A-GG--C-A-CG-A--AA-G-C---G-TG--                |   |   |   |   |   |   |     |                                                                                                                                                    |   |   |   |   |   |   |   |   |   |   |   |   |   |   |   |   |   |    |   |  |  |  |  |  |  |  |
| GG-G--AG-C-G-AA-----CG--GG Bacteria(100);Chloroflexi(100);Anaerolineae(100);Anaerolineales(100);Anaerolineaceae(100);uncultured(100);unclassified(100);unclassified(100);unclassified(100);                                    |   |   |   |   |   |   |     |                                                                                                                                                    |   |   |   |   |   |   |   |   |   |   |   |   |   |   |   |   |   |    |   |  |  |  |  |  |  |  |



|                                                                                                                                                                                                                                                                                                                                                                                                                                                                                                                                                                                                                                                                                                                                                                                                            |   |     |   |   |   |   |    |   |    |   |   |   |   |   |   |   |   |   |   |   |   |   |   |   |   |   |   |
|------------------------------------------------------------------------------------------------------------------------------------------------------------------------------------------------------------------------------------------------------------------------------------------------------------------------------------------------------------------------------------------------------------------------------------------------------------------------------------------------------------------------------------------------------------------------------------------------------------------------------------------------------------------------------------------------------------------------------------------------------------------------------------------------------------|---|-----|---|---|---|---|----|---|----|---|---|---|---|---|---|---|---|---|---|---|---|---|---|---|---|---|---|
| Otu0910                                                                                                                                                                                                                                                                                                                                                                                                                                                                                                                                                                                                                                                                                                                                                                                                    | 0 | 0   | 0 | 0 | 0 | 0 | 0  | 0 | 0  | 0 | 0 | 0 | 0 | 0 | 0 | 0 | 0 | 0 | 0 | 0 | 0 | 0 | 0 | 0 | 0 | 0 | 0 |
|                                                                                                                                                                                                                                                                                                                                                                                                                                                                                                                                                                                                                                                                                                                                                                                                            | 0 | 181 | 0 | 0 | 0 | 0 | 0  | 0 | 0  | 0 | 0 | 0 | 0 | 0 | 0 | 0 | 0 | 0 | 0 | 0 | 0 | 0 | 0 | 0 | 0 | 0 | 0 |
|                                                                                                                                                                                                                                                                                                                                                                                                                                                                                                                                                                                                                                                                                                                                                                                                            | 0 | 0   | 0 | 0 | 0 | 0 | 0  | 0 | 0  | 0 | 0 | 0 | 0 | 0 | 0 | 0 | 0 | 0 | 0 | 0 | 0 | 0 | 0 | 0 | 0 | 0 | 0 |
|                                                                                                                                                                                                                                                                                                                                                                                                                                                                                                                                                                                                                                                                                                                                                                                                            | 0 | 0   | 0 | 0 | 0 | 0 | 3  | 0 | 32 | 0 | 0 | 0 | 0 | 0 | 0 | 0 | 0 | 0 | 0 | 0 | 0 | 0 | 0 | 0 | 0 | 0 | 0 |
| M02255_77_000000000-ADUT3_1_1101_18351_12947 T---AC---GT-AG-GTG-----GCA-A-G-----C-G-T--T--AT-C-CGG-AT-----TT-A-C-T-GG-GT-----GT-A---AA-GG-GC-GT-----G-TA-G-G-C-G-----G-G-AT-C-G-C-----AA---G-T-C-A-----G-A-T-G-TG-A-AA-AC-T-G-GA-G-G----CT-C-AA-----C-C-T-C-C-A-G--C-C---T-G--C-A--T--T-----T-GA-A-A--C-----T-G-T-GG-T-T-C---T-T-G-A-G-T-A--C-TG---GA-G-A-----G-G-C-A--GA-C-----GG-A-ATT---C-C-T-A-GT--GT-A-G-CG-GT--G---A-A-A---TG-C-GT-AG--AT-A-TT--A-G--G-A-G-G-A-AC-A-CC--AG--T-G--GC-GAA-G--G-C-G-----G-T-C-T-G---CTG--G--AC-A-G-----C-A--A-C-T-GA-CG-C-T-G--A-GG--C-G-CG-A-AA-G-C---G-TG--GG-G--AG-C-A-AA-----CA--GG Bacteria(100);Firmicutes(100);Clostridia(100);Clostridiales(100);unclassified(100);unclassified(100);unclassified(100);unclassified(100);unclassified(100);                     |   |     |   |   |   |   |    |   |    |   |   |   |   |   |   |   |   |   |   |   |   |   |   |   |   |   |   |
| Otu0911                                                                                                                                                                                                                                                                                                                                                                                                                                                                                                                                                                                                                                                                                                                                                                                                    | 0 | 0   | 0 | 0 | 0 | 0 | 0  | 0 | 0  | 0 | 0 | 0 | 0 | 0 | 0 | 0 | 0 | 0 | 0 | 0 | 0 | 0 | 0 | 0 | 0 | 0 | 0 |
|                                                                                                                                                                                                                                                                                                                                                                                                                                                                                                                                                                                                                                                                                                                                                                                                            | 0 | 0   | 0 | 0 | 0 | 0 | 36 | 0 | 0  | 0 | 0 | 0 | 0 | 0 | 0 | 0 | 0 | 0 | 0 | 0 | 0 | 0 | 0 | 0 | 0 | 0 | 0 |
|                                                                                                                                                                                                                                                                                                                                                                                                                                                                                                                                                                                                                                                                                                                                                                                                            | 0 | 0   | 0 | 0 | 0 | 0 | 0  | 0 | 0  | 0 | 0 | 0 | 0 | 0 | 0 | 0 | 5 | 0 | 0 | 0 | 0 | 0 | 0 | 0 | 0 | 0 | 0 |
|                                                                                                                                                                                                                                                                                                                                                                                                                                                                                                                                                                                                                                                                                                                                                                                                            | 0 | 0   | 0 | 0 | 0 | 0 | 0  | 0 | 0  | 0 | 0 | 0 | 0 | 0 | 0 | 0 | 0 | 0 | 0 | 0 | 0 | 0 | 0 | 0 | 0 | 0 | 0 |
| M02255_76_000000000-ADUNE_1_1102_20855_12687 G---AC---GT-AG-GAT-----CCG-A-G-----C-G-T--T--GT-C-CGG-AG-----TT-A-C-T-GG-GC-----GT-A---AA-----GC-----G-C---G-C-----G---C-----G---G---G---G-TG-A-AA-GC-C-C-CC-C-G----CT-C-AA-----C-G-G-G-G-A-G-G---G-T-C-C--G-T-----C-GA-G-A--T-----G-G-C-GT-G-T-C---T-G-G-A-G-G-C--A-GG---GA-G-A-----G-G-C-C--AG-T-----GG-A-ATT---C-C-G-G-GT--GT-A-G-TG-GT--G---A-A-A---TG-C-GT-AG--AG-A-TC-C-G--G-A-G-G-A-AC-A-CC--AG--T-G--GC-GAA-G--G-C-G-----G-C-T-G-G---CTG--G--AC-C-T-----G-A--C-C-T-GA-CG-C-T-GA-G--G--C-G-CG-A-AG-G-C---G-TG--GG-G-AG-C-G-AA-----CG--GG Bacteria(100);Chloroflexi(100);unclassified(100);unclassified(100);unclassified(100);unclassified(100);unclassified(100);unclassified(100);unclassified(100);                                                 |   |     |   |   |   |   |    |   |    |   |   |   |   |   |   |   |   |   |   |   |   |   |   |   |   |   |   |
| Otu0912                                                                                                                                                                                                                                                                                                                                                                                                                                                                                                                                                                                                                                                                                                                                                                                                    | 0 | 0   | 0 | 0 | 0 | 0 | 0  | 0 | 0  | 0 | 0 | 0 | 0 | 0 | 0 | 0 | 0 | 0 | 0 | 0 | 0 | 0 | 0 | 0 | 0 | 0 | 0 |
|                                                                                                                                                                                                                                                                                                                                                                                                                                                                                                                                                                                                                                                                                                                                                                                                            | 0 | 0   | 0 | 0 | 0 | 0 | 25 | 0 | 0  | 0 | 0 | 0 | 0 | 0 | 0 | 0 | 0 | 0 | 0 | 0 | 0 | 0 | 0 | 0 | 0 | 0 | 0 |
|                                                                                                                                                                                                                                                                                                                                                                                                                                                                                                                                                                                                                                                                                                                                                                                                            | 0 | 0   | 0 | 0 | 0 | 0 | 0  | 0 | 0  | 0 | 0 | 0 | 0 | 0 | 0 | 0 | 0 | 0 | 0 | 0 | 0 | 0 | 0 | 0 | 0 | 0 | 0 |
|                                                                                                                                                                                                                                                                                                                                                                                                                                                                                                                                                                                                                                                                                                                                                                                                            | 0 | 0   | 0 | 0 | 0 | 0 | 0  | 0 | 0  | 0 | 0 | 0 | 0 | 0 | 0 | 0 | 0 | 0 | 0 | 0 | 0 | 0 | 0 | 0 | 0 | 0 | 0 |
| M02255_76_000000000-ADUNE_1_1101_24422_23499 T---AA---CT-A--CGT-----GCC-A-G-----C-A-G---C--CG-C-GGT-AA-----TA-C--G-T--AG-GG-----GG-C---AA-GC-G--TT-----G---T-C-C-G-----G--A-CT-T-T-T-----AA---G-T-C-T-----G-A-T-G--TG-A-AA-GC-C-C-AC-G-G----CT-T-AA-----C-C-G-T-G-G-A-G---G-GT-C-A--T--T-----G-GA-A-A--C-----T-G-G--AG--G-A-C---T-T-G-A-G-T-A--C-AG---AA-G-A-----G-G-A-G--AG-T-----GG-A-ATT---C-C-A-C-GT--GT-A-G-CG-GT--G---A-A-A---TG-C-GT-AG--AG-A-TG--T-G--G-A-G-G-A-AC-A-CC--AG--T-G--GC-GAA-G--G-C-G-----A-C-T-C-T---CTG--G--TC-T-G-----T-A--A-C-T-GA-CG-C-T-G--A-GG--T-G-CG-A-AA-G-C---G-TG--GG-G--AG-C-G-AA-----CA--GG Bacteria(100);Firmicutes(100);Bacilli(100);Bacillales(100);Bacillaceae(100);unclassified(100);unclassified(100);unclassified(100);unclassified(100);                         |   |     |   |   |   |   |    |   |    |   |   |   |   |   |   |   |   |   |   |   |   |   |   |   |   |   |   |
| Otu0913                                                                                                                                                                                                                                                                                                                                                                                                                                                                                                                                                                                                                                                                                                                                                                                                    | 0 | 0   | 0 | 0 | 0 | 0 | 0  | 0 | 0  | 0 | 0 | 0 | 0 | 0 | 0 | 0 | 0 | 0 | 0 | 0 | 0 | 0 | 0 | 0 | 0 | 0 | 0 |
|                                                                                                                                                                                                                                                                                                                                                                                                                                                                                                                                                                                                                                                                                                                                                                                                            | 0 | 12  | 5 | 7 | 0 | 0 | 0  | 0 | 0  | 0 | 0 | 0 | 0 | 0 | 0 | 0 | 0 | 0 | 0 | 0 | 0 | 0 | 0 | 0 | 0 | 0 | 0 |
|                                                                                                                                                                                                                                                                                                                                                                                                                                                                                                                                                                                                                                                                                                                                                                                                            | 0 | 0   | 0 | 0 | 0 | 0 | 0  | 0 | 0  | 0 | 0 | 0 | 0 | 0 | 0 | 0 | 0 | 0 | 0 | 0 | 0 | 0 | 0 | 0 | 0 | 0 | 0 |
|                                                                                                                                                                                                                                                                                                                                                                                                                                                                                                                                                                                                                                                                                                                                                                                                            | 0 | 0   | 0 | 0 | 0 | 0 | 0  | 0 | 0  | 0 | 0 | 0 | 0 | 0 | 0 | 0 | 0 | 0 | 0 | 0 | 0 | 0 | 0 | 0 | 0 | 0 | 0 |
| M02255_77_000000000-ADUT3_1_1113_20927_7747 C---AA---AC-TC-TGT-----GCC-A-G-----C---A--G--CC-G-CGG-TA-----AT-A-C-A-GA-GG-----GT--G---CA-A-GC-GT-----TG-T-T-C-G-----G--A-AT-T-G-A-----CA---G-T-C-A-----C-G-G--G--TG-A-AA-TC-C-C-CA-A-G----CT-T-AA-----C-T-T-G-G-G-A--A-C---T-G--C-C--T--G-----T-GA-G-A--C-----C-T-C--AG--T-A-C---T-A-G-A-G-T--G--T-GA---GA-G-G-----G-G-A-T--AG-T-----GG-A-ATA---C-C-C-A-GT--GT-A-G-CG-GT--G---A-A-A---TG-C-GT-AG--AG-A-TT--G-G--G-T-G-G-A-AC-A-CC--GG--T-G--GC-GAA-G--G-C-G-----G--C-T-A-T---CTG--G--CT-C-A-----C-A--A-C-T-GA-CG-A-T-C--A-GG--C-A-CG-A-AA-G-C---G-TG--GG-G--AG-C-A-AA-----CA--GG Bacteria(100);unclassified(100);unclassified(100);unclassified(100);unclassified(100);unclassified(100);unclassified(100);unclassified(100);unclassified(100);              |   |     |   |   |   |   |    |   |    |   |   |   |   |   |   |   |   |   |   |   |   |   |   |   |   |   |   |
| Otu0914                                                                                                                                                                                                                                                                                                                                                                                                                                                                                                                                                                                                                                                                                                                                                                                                    | 0 | 0   | 0 | 0 | 0 | 0 | 0  | 0 | 0  | 0 | 0 | 0 | 0 | 0 | 0 | 0 | 0 | 0 | 0 | 0 | 0 | 0 | 0 | 0 | 0 | 0 | 0 |
|                                                                                                                                                                                                                                                                                                                                                                                                                                                                                                                                                                                                                                                                                                                                                                                                            | 0 | 47  | 0 | 0 | 0 | 0 | 0  | 0 | 0  | 0 | 0 | 0 | 0 | 0 | 0 | 0 | 0 | 0 | 0 | 0 | 0 | 0 | 0 | 0 | 0 | 0 | 0 |
|                                                                                                                                                                                                                                                                                                                                                                                                                                                                                                                                                                                                                                                                                                                                                                                                            | 0 | 0   | 0 | 0 | 0 | 0 | 0  | 0 | 0  | 0 | 0 | 0 | 0 | 0 | 0 | 0 | 0 | 0 | 0 | 0 | 0 | 0 | 0 | 0 | 0 | 0 | 0 |
|                                                                                                                                                                                                                                                                                                                                                                                                                                                                                                                                                                                                                                                                                                                                                                                                            | 0 | 0   | 0 | 0 | 0 | 0 | 0  | 0 | 0  | 0 | 0 | 0 | 0 | 0 | 0 | 0 | 0 | 0 | 0 | 0 | 0 | 0 | 0 | 0 | 0 | 0 | 0 |
| M02255_77_000000000-ADUT3_1_2106_26558_12956 C---GT---GC-CA-GCA-----GCC-G-C-----G--G--T---A--AT-A-CGG-AG-----GA-T--G-C--GA-GC-----GT--T---AT-CC-GG-AT-----T-TA-G-G-T-G-----G--G-TT-G-T-T-----AA---G-T-C-A-----G-C-G--G--TG-A-AA-TG--T-T-TA-A-G----CT-C-AA-----C-T-T-A-G-A-C--A-C---T-G--C-C--G--T-----T-GA-A-A--C-----T-G-G--CG--A-G-C---T-T-G-A-G-T--G--C-AA---AG-G-A-----G-G-T-A--GG-C-----GG--A-ATT---C-G-T-G-GT--GT-A-G-CG-GT--G---A-A-A---TG-C-AT-AG--AT-A-TC--A-C--G-A-G-G-A-AC-T-CC--GA--T--T--GC-GTA-G--G-C-A-----G--C-T-T-A---CTA--T--CA-T-G-----C-A--A-C-T-GA-CA-C-T-G--A-AG--C-A-CG-A-AA-G-C---G-TG--GG-T--AT-C-A-AA-----CA--GG Bacteria(100);Bacteroidetes(100);Bacteroidia(100);Bacteroidales(100);unclassified(100);unclassified(100);unclassified(100);unclassified(100);unclassified(100); |   |     |   |   |   |   |    |   |    |   |   |   |   |   |   |   |   |   |   |   |   |   |   |   |   |   |   |



|                                                                                                                                                                                                                |   |   |   |   |   |    |   |   |   |   |   |   |   |   |   |   |   |   |   |   |   |   |   |   |   |   |  |
|----------------------------------------------------------------------------------------------------------------------------------------------------------------------------------------------------------------|---|---|---|---|---|----|---|---|---|---|---|---|---|---|---|---|---|---|---|---|---|---|---|---|---|---|--|
| Otu0915                                                                                                                                                                                                        | 0 | 0 | 0 | 0 | 0 | 0  | 0 | 0 | 0 | 0 | 0 | 0 | 0 | 0 | 0 | 0 | 0 | 0 | 0 | 0 | 0 | 0 | 0 | 0 | 0 | 0 |  |
|                                                                                                                                                                                                                | 0 | 0 | 0 | 0 | 0 | 53 | 0 | 0 | 0 | 0 | 0 | 0 | 0 | 0 | 0 | 0 | 0 | 0 | 0 | 0 | 0 | 0 | 0 | 0 | 0 | 0 |  |
|                                                                                                                                                                                                                | 0 | 0 | 0 | 0 | 0 | 0  | 0 | 0 | 0 | 0 | 0 | 0 | 0 | 0 | 0 | 0 | 0 | 0 | 0 | 0 | 0 | 0 | 0 | 0 | 0 | 0 |  |
|                                                                                                                                                                                                                | 0 | 0 | 0 | 0 | 0 | 0  | 0 | 0 | 0 | 0 | 0 | 0 | 0 | 0 | 0 | 0 | 0 | 0 | 0 | 0 | 0 | 0 | 0 | 0 | 0 | 0 |  |
| M02255_77_000000000-ADUT3_1_1114_5051_17539 T---AC--GA-AG-GGG-----GCT-A-G----C-G-T---T-GC-T-CGG-AA-----TC-A-C-T--GG-GC-----GT-A----AA-GG-GC-GC-----G-TA-G-G-C-G-----G--A-TG-A-T-T-----                         |   |   |   |   |   |    |   |   |   |   |   |   |   |   |   |   |   |   |   |   |   |   |   |   |   |   |  |
| AA---G-T-C-G-----G-A-G--G-TG--A-AA-GC--C-C-AG-G-G----CT-C-AA-----C-C-C-T-G-G-A-A-T---T-G--C-C--T-T-----C-GA-T-A--C-----T-G-A-TC-G-T-C---T-C-G-A-G-A-A--T-GG----AA-G-A-----G-G-T-A--AG-T-----GG--A-ATA---C-C-G- |   |   |   |   |   |    |   |   |   |   |   |   |   |   |   |   |   |   |   |   |   |   |   |   |   |   |  |
| A-GT--GT-A-G-AG-GT--G---A-A-A---TT-C-GT-AG--AT-A-TT--C-G--G-T-G-G-A-AC-A-CC--AG--T-G--GC-GAA-G-G-C-G-----A-C-T-T-A---CTG-G--TC-C-A-----T-T---T-C-T--GA--CG-C-T-G--A-GG--C-G-CG-A-AA-G-C--G-TG--GG-G--AT-       |   |   |   |   |   |    |   |   |   |   |   |   |   |   |   |   |   |   |   |   |   |   |   |   |   |   |  |
| C-A-AA-----CA--GG Bacteria(100);Proteobacteria(100);Alphaproteobacteria(100);unclassified(100);unclassified(100);unclassified(100);unclassified(100);unclassified(100);unclassified(100);                      |   |   |   |   |   |    |   |   |   |   |   |   |   |   |   |   |   |   |   |   |   |   |   |   |   |   |  |
| Otu0916                                                                                                                                                                                                        | 0 | 0 | 0 | 0 | 0 | 0  | 0 | 0 | 0 | 0 | 0 | 0 | 0 | 0 | 0 | 0 | 0 | 0 | 0 | 0 | 0 | 0 | 0 | 0 | 0 | 0 |  |
|                                                                                                                                                                                                                | 0 | 0 | 0 | 0 | 0 | 21 | 0 | 0 | 0 | 0 | 0 | 0 | 0 | 0 | 0 | 0 | 0 | 0 | 0 | 0 | 0 | 0 | 0 | 0 | 0 | 0 |  |
|                                                                                                                                                                                                                | 0 | 0 | 0 | 0 | 0 | 0  | 0 | 0 | 0 | 0 | 0 | 0 | 0 | 0 | 0 | 0 | 0 | 0 | 0 | 0 | 0 | 0 | 0 | 0 | 0 | 0 |  |
|                                                                                                                                                                                                                | 0 | 0 | 0 | 0 | 0 | 0  | 0 | 0 | 0 | 0 | 0 | 0 | 0 | 0 | 0 | 0 | 0 | 0 | 0 | 0 | 0 | 0 | 0 | 0 | 0 | 0 |  |
| M02255_77_000000000-ADUT3_1_1112_6996_10726 T---AC--GT-AG-GGG-----GCA-A-G----C-G-T---T-GT-C-CGG-AT-----TT-A-T-T--GG-GC-----GT-A----AA-GA-GC-TC-----G-TA-G-G-C-G-----G--T-TT-G-G-T-----AA-                      |   |   |   |   |   |    |   |   |   |   |   |   |   |   |   |   |   |   |   |   |   |   |   |   |   |   |  |
| ---G-T-C-G-----G-A-T-G--TG--A-AA-TC--T-C-CA-G-G----CT-C-AA-----C-T-T-G-G-A-G-G---G-G-TC-A--T-T-----C-GA-T-A--C-----T-G-C--CA-TG-A-C---T-A-G-A-G-T-T--T-GG----TA-G-G-----G-G-A-G--TG-T-----GG--A-ATT---T-C-T-G- |   |   |   |   |   |    |   |   |   |   |   |   |   |   |   |   |   |   |   |   |   |   |   |   |   |   |  |
| GT--GG-A-G-CG-GT--G---A-A-A---TG-C-GC-AG--AT-A-TC--A-G--A-A-G-G-A-AC-A-CC--CG--T-A--GC-GAA-G-G-C-G-----G-C-A-C-T---CTG-G--GC-C-A-----T-A--A-C-T--GA--CG-C-T-G--A-GG--A-G-CG-A-AA-G-C--G-TG--GG-G--AG-          |   |   |   |   |   |    |   |   |   |   |   |   |   |   |   |   |   |   |   |   |   |   |   |   |   |   |  |
| C-G-AA-----CA--GG Bacteria(100);Actinobacteria(100);Actinobacteria(100);unclassified(100);unclassified(100);unclassified(100);unclassified(100);unclassified(100);unclassified(100);                           |   |   |   |   |   |    |   |   |   |   |   |   |   |   |   |   |   |   |   |   |   |   |   |   |   |   |  |
| Otu0917                                                                                                                                                                                                        | 0 | 0 | 0 | 0 | 0 | 0  | 0 | 0 | 0 | 0 | 0 | 0 | 0 | 0 | 0 | 0 | 0 | 0 | 0 | 0 | 0 | 0 | 0 | 0 | 0 | 0 |  |
|                                                                                                                                                                                                                | 0 | 0 | 0 | 0 | 0 | 34 | 0 | 0 | 0 | 0 | 0 | 0 | 0 | 0 | 0 | 0 | 0 | 0 | 0 | 0 | 0 | 0 | 0 | 0 | 0 | 0 |  |
|                                                                                                                                                                                                                | 0 | 0 | 0 | 0 | 0 | 0  | 0 | 0 | 0 | 0 | 0 | 0 | 0 | 0 | 0 | 0 | 0 | 0 | 0 | 0 | 0 | 0 | 0 | 0 | 0 | 0 |  |
|                                                                                                                                                                                                                | 0 | 0 | 0 | 0 | 0 | 0  | 0 | 0 | 0 | 0 | 0 | 0 | 0 | 0 | 0 | 0 | 0 | 0 | 0 | 0 | 0 | 0 | 0 | 0 | 0 | 0 |  |
| M02255_77_000000000-ADUT3_1_1103_6476_20314 T---AC--GT-AG-GGG-----GCG-A-G----C-G-T---T-GT-C-CGG-AT-----TT-A-T-T--GG-GC-----GT-A----AA-GA-GC-TC-----G-TA-G-G-C-G-----G--C-TT-A-G-C-----AA-                      |   |   |   |   |   |    |   |   |   |   |   |   |   |   |   |   |   |   |   |   |   |   |   |   |   |   |  |
| ---G-T-C-A-----G-G-T-G--TG--A-AA-AC--T-C-CA-G-G----CT-C-AA-----C-C-T-G-GAG-A-----C-G-CC-A--C-T-----T-GA-G-A--C-----T-G-C--TA-TG-G-C---T-A-G-A-G-T-C--C-GG----TA-G-G-----G-G-A-C--CA-C-----GG--A-ATT---C-C-T-G- |   |   |   |   |   |    |   |   |   |   |   |   |   |   |   |   |   |   |   |   |   |   |   |   |   |   |  |
| GT--GT-A-G-CG-GT--G---A-A-A---TG-C-GC-AG--AT-A-TC--A-G--G-A-G-G-A-AC-A-CC--AG--T-G--GC-GAA-G-G-C-G-----G--T-G-G-T---CTG-G--GC-C-G-----G-A--A-C-T--GA--CG-C-T-G--A-GG--A-G-CG-A-AA-G-C--G-TG--GG-T--AG-         |   |   |   |   |   |    |   |   |   |   |   |   |   |   |   |   |   |   |   |   |   |   |   |   |   |   |  |
| C-A-AA-----CA--GG Bacteria(100);Actinobacteria(100);Actinobacteria(100);unclassified(100);unclassified(100);unclassified(100);unclassified(100);unclassified(100);unclassified(100);                           |   |   |   |   |   |    |   |   |   |   |   |   |   |   |   |   |   |   |   |   |   |   |   |   |   |   |  |
| Otu0918                                                                                                                                                                                                        | 0 | 0 | 0 | 0 | 0 | 0  | 0 | 0 | 0 | 0 | 0 | 0 | 0 | 0 | 0 | 0 | 0 | 0 | 0 | 0 | 0 | 0 | 0 | 0 | 0 | 0 |  |
|                                                                                                                                                                                                                | 0 | 0 | 0 | 0 | 0 | 20 | 0 | 0 | 0 | 0 | 0 | 0 | 0 | 0 | 0 | 0 | 0 | 0 | 0 | 0 | 0 | 0 | 0 | 0 | 0 | 0 |  |
|                                                                                                                                                                                                                | 0 | 0 | 0 | 0 | 0 | 0  | 0 | 0 | 0 | 0 | 0 | 0 | 0 | 0 | 0 | 0 | 0 | 0 | 0 | 0 | 0 | 0 | 0 | 0 | 0 | 0 |  |
|                                                                                                                                                                                                                | 0 | 0 | 0 | 0 | 0 | 0  | 0 | 0 | 0 | 0 | 0 | 0 | 0 | 0 | 0 | 0 | 0 | 0 | 0 | 0 | 0 | 0 | 0 | 0 | 0 | 0 |  |
| M02255_77_000000000-ADUT3_1_2106_19145_10695 G---AC--GA-GG-GAT-----CCT-A-G----C-G--T---T-GC-T-CGG-AA-----TC-A--T-T--GG-GC-----GT-A----AA-GC-GG-GT-----G-TA-G-G-G-G-----G--C-TT-G-A-T---                        |   |   |   |   |   |    |   |   |   |   |   |   |   |   |   |   |   |   |   |   |   |   |   |   |   |   |  |
| -----AA---                                                                                                                                                                                                     |   |   |   |   |   |    |   |   |   |   |   |   |   |   |   |   |   |   |   |   |   |   |   |   |   |   |  |



|                                                                                                                                                                                                                   |   |   |   |   |   |   |    |   |   |   |    |   |   |   |   |   |   |   |   |   |   |   |   |   |    |   |   |
|-------------------------------------------------------------------------------------------------------------------------------------------------------------------------------------------------------------------|---|---|---|---|---|---|----|---|---|---|----|---|---|---|---|---|---|---|---|---|---|---|---|---|----|---|---|
| Otu0920                                                                                                                                                                                                           | 0 | 0 | 0 | 0 | 0 | 0 | 0  | 0 | 0 | 0 | 0  | 0 | 0 | 0 | 0 | 0 | 0 | 0 | 0 | 0 | 0 | 0 | 0 | 0 | 0  | 0 | 0 |
|                                                                                                                                                                                                                   | 0 | 1 | 4 | 0 | 0 | 0 | 0  | 0 | 0 | 0 | 79 | 0 | 0 | 0 | 0 | 0 | 0 | 0 | 0 | 0 | 0 | 0 | 0 | 0 | 0  | 0 | 0 |
|                                                                                                                                                                                                                   | 0 | 0 | 0 | 0 | 0 | 0 | 0  | 0 | 0 | 0 | 0  | 0 | 0 | 0 | 0 | 0 | 0 | 0 | 0 | 0 | 0 | 0 | 0 | 0 | 0  | 0 | 0 |
|                                                                                                                                                                                                                   | 0 | 0 | 0 | 0 | 0 | 0 | 0  | 0 | 0 | 0 | 0  | 0 | 0 | 0 | 0 | 0 | 0 | 0 | 0 | 0 | 0 | 0 | 0 | 0 | 0  | 0 | 0 |
| M02255_77_000000000-ADUT3_1_1115_6901_19873 T---AC---GA-AG-GGG-----GCT-A-G-----C-G-T---T-GT-T-CGG-AA-----TT-A-C-T--GG-GC-----GT-A---AA-GC-GC-AC-----G-TA-G-G-C-G-----G-A-CC-C-G-T-----                            |   |   |   |   |   |   |    |   |   |   |    |   |   |   |   |   |   |   |   |   |   |   |   |   |    |   |   |
| AA---G-T-C-A-----G-A-G--G-TG-A-AA-GC-C-T-GG-A-G-----CT-T-AA-----C-T-C-C-A-G-A-A-C---T-G-C-C---T-T-----T-GA-T-A--C-----T-G-C-GG-G-T-C---T-T-G-A-G-G-A--T-GG---GA-G-A-----G-G-T-G---AG-T-----GG-A-ACT---G-C-        |   |   |   |   |   |   |    |   |   |   |    |   |   |   |   |   |   |   |   |   |   |   |   |   |    |   |   |
| G-A-GT--GT-A-G-AG-GT--G---A-A-A---TT-C-GT-AG--AT-A-TT--C-G--C-A-A-G-A-AC-A-CC---AG--T-G--GC-GAA-G--G-C-G-----G-C-T-C-A--CTG--G--CC-C-A-----T-T---A-C-T-GA-CG-C-T-G--A-GG--T-G-CG-A-AA-G-C--G-TG--GG-G--           |   |   |   |   |   |   |    |   |   |   |    |   |   |   |   |   |   |   |   |   |   |   |   |   |    |   |   |
| AG-C-A-AA-----CA--GG Bacteria(100);Proteobacteria(100);Alphaproteobacteria(100);Rhizobiales(100);unclassified(100);unclassified(100);unclassified(100);unclassified(100);unclassified(100);                       |   |   |   |   |   |   |    |   |   |   |    |   |   |   |   |   |   |   |   |   |   |   |   |   |    |   |   |
| Otu0921                                                                                                                                                                                                           | 0 | 0 | 0 | 0 | 0 | 0 | 0  | 0 | 0 | 0 | 0  | 0 | 0 | 0 | 0 | 0 | 0 | 0 | 0 | 0 | 0 | 0 | 0 | 0 | 0  | 0 | 0 |
|                                                                                                                                                                                                                   | 0 | 0 | 0 | 0 | 0 | 0 | 62 | 0 | 0 | 0 | 0  | 0 | 0 | 0 | 0 | 0 | 0 | 0 | 0 | 0 | 0 | 0 | 0 | 0 | 14 | 0 | 0 |
|                                                                                                                                                                                                                   | 0 | 0 | 0 | 0 | 0 | 0 | 0  | 0 | 0 | 0 | 0  | 0 | 0 | 0 | 0 | 0 | 0 | 0 | 0 | 0 | 0 | 0 | 0 | 0 | 0  | 0 | 0 |
|                                                                                                                                                                                                                   | 0 | 0 | 0 | 0 | 0 | 0 | 0  | 0 | 0 | 0 | 0  | 0 | 0 | 0 | 0 | 0 | 0 | 0 | 0 | 0 | 0 | 0 | 0 | 0 | 0  | 0 | 0 |
| M02255_77_000000000-ADUT3_1_1109_8036_4281 G---AC---GG-AG-GAT-----GCA-A-G-----C-G-T---T-AT-C-CGG-AA-----TG-A--T-T--GG-GC-----GT-A---AA-GC-GT-CT-----G-TA-G-G-T-G-----G-A-TT-G-T-A-----AA-                         |   |   |   |   |   |   |    |   |   |   |    |   |   |   |   |   |   |   |   |   |   |   |   |   |    |   |   |
| ---G-T-C-C-----T-C-T--G--TT-A-AA-GA--T-C-GG-G-G-----CT-T-AA-----C-C-C-A-G-T-T--C-A---A-G--C-A--G-T-----G--GA-A-A--C-----T-T-A-TA-A-T-C---T-A-G-A-G-T-A--C-GG---TA-G-G-----G-G-C-A--GA-G-----GG--A--ATT---C-C-C-G- |   |   |   |   |   |   |    |   |   |   |    |   |   |   |   |   |   |   |   |   |   |   |   |   |    |   |   |
| GT--GT-A-G-CG-GT--G---A-A-A---TG-C-GT-AG--AT-A-TC--G-G--G-A-A-G-A-AC-A-CC--GA--C--A--GC-GAA-A-G-C-A-----C-T-C-T-G---CTG--G--GC-C-G-----A-A--A-C-T-GA-CA-C-T-A-A-GA--G-A-CG-A-AA-G-C--T-AG--GG-G--AG-              |   |   |   |   |   |   |    |   |   |   |    |   |   |   |   |   |   |   |   |   |   |   |   |   |    |   |   |
| C-A-AA-----AA--GG Bacteria(100);Cyanobacteria(100);unclassified(100);unclassified(100);unclassified(100);unclassified(100);unclassified(100);unclassified(100);unclassified(100);                                 |   |   |   |   |   |   |    |   |   |   |    |   |   |   |   |   |   |   |   |   |   |   |   |   |    |   |   |
| Otu0922                                                                                                                                                                                                           | 0 | 0 | 0 | 0 | 0 | 0 | 0  | 0 | 0 | 0 | 0  | 0 | 0 | 0 | 0 | 0 | 0 | 0 | 0 | 0 | 0 | 0 | 0 | 0 | 0  | 0 | 2 |
|                                                                                                                                                                                                                   | 0 | 0 | 0 | 0 | 0 | 0 | 0  | 0 | 0 | 0 | 0  | 0 | 0 | 0 | 0 | 0 | 0 | 0 | 0 | 0 | 0 | 0 | 0 | 0 | 2  | 0 | 0 |
|                                                                                                                                                                                                                   | 0 | 0 | 0 | 0 | 0 | 0 | 0  | 0 | 0 | 0 | 0  | 0 | 0 | 0 | 0 | 0 | 0 | 0 | 0 | 0 | 0 | 0 | 0 | 0 | 0  | 0 | 0 |
|                                                                                                                                                                                                                   | 0 | 0 | 0 | 0 | 0 | 0 | 0  | 0 | 0 | 0 | 0  | 0 | 0 | 0 | 0 | 0 | 0 | 0 | 0 | 0 | 0 | 0 | 0 | 0 | 0  | 0 | 0 |
| M02255_77_000000000-ADUT3_1_2101_10529_11214 T---AC---GT-AG-GTG-----TCA-A-G-----C-G-T---T-GT-C-CGG-AT-----TT-A-T-T--GG-GC-----GT-A---AA-GC-GC-CC-----G-CA-G-G-C-G-----G-C-TT-G-C-C-----                           |   |   |   |   |   |   |    |   |   |   |    |   |   |   |   |   |   |   |   |   |   |   |   |   |    |   |   |
| ---AA---G-T-T-C-----G-A-T--G--TG-A-AA-GC-T-C-CC-G-G-----CT-T-AA-----C-T-G-G-G-A-G--G-G---T-G--C-A--T-C-----G--AA-A-A--C-----T-G-G--CA-G-G-C---T-T-G-A-G-G-C--A-GG---GA-G-A-----G-G-G-A--TG-T-----GG--A--ATT---    |   |   |   |   |   |   |    |   |   |   |    |   |   |   |   |   |   |   |   |   |   |   |   |   |    |   |   |
| C-C-A-G-GT--GT-A-G-TG-GT--G---A-A-A---TG-C-GT-AG--AT-A-TC--T-G--G-A-G-G-A-AC-A-CC--AG--T-G--GC-GAA-G--G-C-G-----G--C-A-T-C---CTG--GC-CC--T-----G-T---C-C-T-GA-CG-C-T-C--A-GG--G-G-CG-A-AA-G-C--G-TG--GG-          |   |   |   |   |   |   |    |   |   |   |    |   |   |   |   |   |   |   |   |   |   |   |   |   |    |   |   |
| G--AG-C-A-AA-----CC--GG Bacteria(100);Chloroflexi(100);unclassified(100);unclassified(100);unclassified(100);unclassified(100);unclassified(100);unclassified(100);unclassified(100);                             |   |   |   |   |   |   |    |   |   |   |    |   |   |   |   |   |   |   |   |   |   |   |   |   |    |   |   |
| Otu0923                                                                                                                                                                                                           | 0 | 0 | 0 | 0 | 0 | 0 | 0  | 0 | 0 | 0 | 0  | 0 | 0 | 0 | 0 | 0 | 0 | 0 | 0 | 0 | 0 | 0 | 0 | 0 | 0  | 0 | 2 |
|                                                                                                                                                                                                                   | 0 | 0 | 0 | 0 | 0 | 0 | 0  | 0 | 0 | 0 | 0  | 0 | 0 | 0 | 0 | 0 | 0 | 0 | 0 | 0 | 0 | 0 | 0 | 0 | 0  | 0 | 0 |
|                                                                                                                                                                                                                   | 0 | 0 | 0 | 0 | 0 | 0 | 0  | 0 | 0 | 0 | 0  | 0 | 0 | 0 | 0 | 0 | 8 | 0 | 0 | 0 | 0 | 0 | 0 | 0 | 0  | 0 | 0 |
|                                                                                                                                                                                                                   | 0 | 0 | 0 | 0 | 0 | 0 | 0  | 0 | 0 | 0 | 0  | 0 | 0 | 0 | 0 | 0 | 0 | 0 | 0 | 0 | 0 | 0 | 0 | 0 | 0  | 0 | 0 |
| M02255_77_000000000-ADUT3_1_21                                                                                                                                                                                    |   |   |   |   |   |   |    |   |   |   |    |   |   |   |   |   |   |   |   |   |   |   |   |   |    |   |   |



[illegible]



|                                                                                                                                                                                                                   |                                                                                                                                                                                                              |   |   |   |   |   |    |   |   |   |   |   |   |   |   |   |   |   |   |   |   |   |   |   |   |   |
|-------------------------------------------------------------------------------------------------------------------------------------------------------------------------------------------------------------------|--------------------------------------------------------------------------------------------------------------------------------------------------------------------------------------------------------------|---|---|---|---|---|----|---|---|---|---|---|---|---|---|---|---|---|---|---|---|---|---|---|---|---|
| Otu0930                                                                                                                                                                                                           | 0                                                                                                                                                                                                            | 0 | 0 | 0 | 0 | 0 | 0  | 0 | 0 | 0 | 0 | 0 | 0 | 0 | 0 | 0 | 0 | 0 | 0 | 0 | 0 | 0 | 0 | 0 | 0 | 0 |
|                                                                                                                                                                                                                   | 0                                                                                                                                                                                                            | 0 | 0 | 0 | 0 | 0 | 18 | 0 | 0 | 0 | 0 | 0 | 0 | 0 | 0 | 0 | 0 | 0 | 0 | 0 | 0 | 0 | 0 | 0 | 0 | 0 |
|                                                                                                                                                                                                                   | 0                                                                                                                                                                                                            | 0 | 0 | 0 | 0 | 0 | 0  | 0 | 0 | 0 | 0 | 0 | 0 | 0 | 0 | 0 | 0 | 0 | 0 | 0 | 0 | 0 | 0 | 0 | 0 | 0 |
|                                                                                                                                                                                                                   | 0                                                                                                                                                                                                            | 0 | 0 | 0 | 0 | 0 | 0  | 0 | 0 | 0 | 0 | 0 | 0 | 0 | 0 | 0 | 0 | 0 | 0 | 0 | 0 | 0 | 0 | 0 | 0 | 0 |
| M02255_77_000000000-ADUT3_1_1109_13693_20753                                                                                                                                                                      | C---AC--GT-AG-GGA-----CCA-A-G-----C-G-T--T--GT-C-CGG-AT-----TC-A--T-T-GG-GC-----GT--A----AA-GA-GC-TC-----G-TA-G-G-C-G-----G--T-TC-G-A-T-----                                                                 |   |   |   |   |   |    |   |   |   |   |   |   |   |   |   |   |   |   |   |   |   |   |   |   |   |
| ----                                                                                                                                                                                                              | AA---G-T-C-G-----G-G-T--G--TG--A-AA-CC--T-C-CA-G-G---CT-C-AA-----C-C-T-G-GAG-A-----C-G-CC-A--C-C-----C-GA-T-A--C-----T-G-T-CG-TG-A-C---T-A-G-A-G-T-C--C-AG---TA-G-G-----G-G-A-G---CG-T-----GG--A--ATT---C-   |   |   |   |   |   |    |   |   |   |   |   |   |   |   |   |   |   |   |   |   |   |   |   |   |   |
| C-T-G-GT--GT-A-G-CG-GT--G---                                                                                                                                                                                      | A-A-A--TG-C-GC-AG--AT-A-TC--A-G-G-A-G-G-A-AC-A-CC---AG--C--G--GC-GAA-G--G-C-G-----G-C-G-C-T--CTG--G--GC-T-G-----G-A--A-C-T-GA--CG-C-T-G--A-GG--A-G-CG-A-AA-G-C---G-TG--GG-                                   |   |   |   |   |   |    |   |   |   |   |   |   |   |   |   |   |   |   |   |   |   |   |   |   |   |
| G--AG-C-G-AA-----CA--GG                                                                                                                                                                                           | Bacteria(100);Actinobacteria(100);Actinobacteria(100);Acidimicrobiadae(100);Acidimicrobiales(100);Acidimicrobineae(100);unclassified(100);unclassified(100);unclassified(100);                               |   |   |   |   |   |    |   |   |   |   |   |   |   |   |   |   |   |   |   |   |   |   |   |   |   |
| Otu0931                                                                                                                                                                                                           | 0                                                                                                                                                                                                            | 0 | 0 | 0 | 0 | 0 | 0  | 0 | 0 | 0 | 0 | 0 | 0 | 0 | 0 | 0 | 0 | 0 | 0 | 0 | 0 | 0 | 0 | 0 | 0 | 6 |
|                                                                                                                                                                                                                   | 0                                                                                                                                                                                                            | 0 | 0 | 0 | 0 | 0 | 0  | 0 | 0 | 0 | 0 | 0 | 0 | 0 | 0 | 0 | 0 | 0 | 0 | 0 | 0 | 0 | 0 | 0 | 0 | 0 |
|                                                                                                                                                                                                                   | 0                                                                                                                                                                                                            | 0 | 0 | 0 | 0 | 0 | 0  | 0 | 0 | 0 | 0 | 0 | 0 | 0 | 0 | 0 | 0 | 0 | 0 | 0 | 0 | 0 | 0 | 0 | 0 | 0 |
|                                                                                                                                                                                                                   | 0                                                                                                                                                                                                            | 0 | 0 | 0 | 0 | 0 | 0  | 0 | 0 | 0 | 0 | 0 | 0 | 0 | 0 | 0 | 0 | 0 | 0 | 0 | 0 | 0 | 0 | 0 | 0 | 0 |
| M02255_77_000000000-ADUT3_1_1114_10619_20633                                                                                                                                                                      | G---AC--GT-AG-GAT-----GCA-A-G-----C-G-T--T--GT-C-CGG-AA-----TT-A--T-T-GG-GC-----GT--A----AA-GA-GT-TC-----G-TA-G-G-C-G-----G--T-TT-G-T-T-----                                                                 |   |   |   |   |   |    |   |   |   |   |   |   |   |   |   |   |   |   |   |   |   |   |   |   |   |
| ----                                                                                                                                                                                                              | AA---G-T-C-T-----G-G-T--G--TT--A-AA-GA--C-G-GG-A-G---CT-C-AA-----C-T-C-C-C-G-C-A--T--G-G--C-A--T--C-----G-GA-T-A--C-----T-G-G-CA--G-G-C---T-A-G-A-G-T-G--T-GG---TA-G-A-----G-G-T-C--TC-G-----GG--A--ATT---C- |   |   |   |   |   |    |   |   |   |   |   |   |   |   |   |   |   |   |   |   |   |   |   |   |   |
| C-A-G-GT--GT-A-G-CG-GT--G---                                                                                                                                                                                      | A-A-A--TG-C-GT-AG--AT-A-TC--T-G--G-A-G-G-A-AC-A-CC---GG--T--G--GC-GAA-A--G-C-G-----C-G-A-G-A--CTG--G--GC-C-A-----T-A--A-C-T-GA--CG-C-T-G--A-GG--A-A-CG-A-AA-G-C---C-AG--GG-                                  |   |   |   |   |   |    |   |   |   |   |   |   |   |   |   |   |   |   |   |   |   |   |   |   |   |
| G--AG-C-A-AA-----AG--GG                                                                                                                                                                                           | Bacteria(100);unclassified(100);unclassified(100);unclassified(100);unclassified(100);unclassified(100);unclassified(100);unclassified(100);unclassified(100);                                               |   |   |   |   |   |    |   |   |   |   |   |   |   |   |   |   |   |   |   |   |   |   |   |   |   |
| Otu0932                                                                                                                                                                                                           | 0                                                                                                                                                                                                            | 0 | 0 | 0 | 0 | 0 | 0  | 0 | 0 | 0 | 0 | 0 | 0 | 0 | 0 | 0 | 0 | 0 | 0 | 0 | 0 | 0 | 0 | 0 | 0 | 6 |
|                                                                                                                                                                                                                   | 0                                                                                                                                                                                                            | 0 | 0 | 0 | 0 | 0 | 0  | 0 | 0 | 0 | 0 | 0 | 0 | 0 | 0 | 0 | 0 | 0 | 0 | 0 | 0 | 0 | 0 | 0 | 0 | 0 |
|                                                                                                                                                                                                                   | 0                                                                                                                                                                                                            | 0 | 0 | 0 | 0 | 0 | 0  | 0 | 0 | 0 | 0 | 0 | 0 | 0 | 0 | 0 | 0 | 0 | 0 | 0 | 0 | 0 | 0 | 0 | 0 | 0 |
|                                                                                                                                                                                                                   | 0                                                                                                                                                                                                            | 0 | 0 | 0 | 0 | 0 | 0  | 0 | 0 | 0 | 0 | 0 | 0 | 0 | 0 | 0 | 0 | 0 | 0 | 0 | 0 | 0 | 0 | 0 | 0 | 0 |
| M02255_77_000000000-ADUT3_1_2104_7652_4899                                                                                                                                                                        | T---AC--GA-AG-GGG-----GCT-A-G-----C-G-T--T--GT-T-CGG-AA-----TT-A--C-T-GG-GC-----GT--A----AA-GC-GC-GC-----G-CA-G-G-C-G-----G--T-CC-G-T-C-----                                                                 |   |   |   |   |   |    |   |   |   |   |   |   |   |   |   |   |   |   |   |   |   |   |   |   |   |
| AA---G-T-C-A-----G-G-G--G--TG--A-AA-GC--C-C-AG-A-G---CT-C-AA-----C-T-C-T-G-G-A--A-C---T-G--C-C---T--T-----T-GA-G-A--C-----T-G-T--AG--G-A-C---T-T-G-G-G-T-A--C-GG---GA-G-A-----G-G-T-G--AG-T-----GG--A--ATT---C-C- |                                                                                                                                                                                                              |   |   |   |   |   |    |   |   |   |   |   |   |   |   |   |   |   |   |   |   |   |   |   |   |   |
| G-A-GT--GT-A-G-AG-GT--G---                                                                                                                                                                                        | A-A-A--TT-C-GT-AG--AT-A-TT--C-G--G-A-G-A-G-A-AC-A-CC---AG--T--G--GC-GAA-G--G-C-G-----G-C-T-C-A--CTG--G--CC-C-G-----T-T--A-C-C--GA--CG-C-T-C-A-GG--C-G-CG-A--CA-G-C---G-TG--GG-G--                            |   |   |   |   |   |    |   |   |   |   |   |   |   |   |   |   |   |   |   |   |   |   |   |   |   |
| AG-C-A-AA-----CA--GG                                                                                                                                                                                              | Bacteria(100);Proteobacteria(100);Alphaproteobacteria(100);unclassified(100);unclassified(100);unclassified(100);unclassified(100);unclassified(100);unclassified(100);                                      |   |   |   |   |   |    |   |   |   |   |   |   |   |   |   |   |   |   |   |   |   |   |   |   |   |
| Otu0933                                                                                                                                                                                                           | 0                                                                                                                                                                                                            | 0 | 0 | 0 | 0 | 0 | 0  | 0 | 0 | 0 | 0 | 0 | 0 | 0 | 0 | 0 | 0 | 0 | 0 | 0 | 0 | 0 | 0 | 0 | 0 | 0 |
|                                                                                                                                                                                                                   | 0                                                                                                                                                                                                            | 0 | 0 | 0 | 0 | 0 | 63 | 0 | 0 | 0 | 0 | 0 | 0 | 0 | 0 | 0 | 0 | 0 | 0 | 0 | 0 | 0 | 0 | 0 | 0 | 0 |
|                                                                                                                                                                                                                   | 0                                                                                                                                                                                                            | 0 | 0 | 0 | 0 | 0 | 0  | 0 | 0 | 0 | 0 | 0 | 0 | 0 | 0 | 0 | 0 | 0 | 0 | 0 | 0 | 0 | 0 | 0 | 0 | 0 |
|                                                                                                                                                                                                                   | 0                                                                                                                                                                                                            | 0 | 0 | 0 | 0 | 0 | 0  | 0 | 0 | 0 | 0 | 0 | 0 | 0 | 0 | 0 | 0 | 0 | 0 | 0 | 0 | 0 | 0 | 0 | 0 | 0 |
| M02255_77_000000000-ADUT3_1_1109_7369_18530                                                                                                                                                                       | T---AC--GA-AG-GGG-----GCT-A-G-----C-G-T--T--GT-T-CGG-AT-----TT-A--C-T-GG-GC-----GT--A----AA-GC-GC-GC-----G-TA-G-G-C-G-----G--G-TC-G-T-T                                                                      |   |   |   |   |   |    |   |   |   |   |   |   |   |   |   |   |   |   |   |   |   |   |   |   |   |



[illegible]



Otu0940 0 0 0 0 0 0 0 0 0 0 0 0 0 0 0 0 0 0 0 0 0 0 0 0 0 0 0 0 0 0  
0 0 0 0 0 0 0 36 0 0 0 0 0 0 0 0 0 0 0 0 0 0 0 0 0 0 0 0 0 0  
0 0 0 0 0 0 0 0 0 0 0 0 0 0 0 0 0 0 0 0 0 0 0 0 0 0 0 0 0 0  
0 0 0 0 0 0 0 0 0 0 0 0 0 0 0 0 0 0 0 0 0 0 0 0 0 0 0 0 0 0  
M02255\_77\_000000000-ADUT3\_1\_1103\_9123\_13953 G---AC---AG-AG-GTG-----CCA-A-G-----C--G--T---T--AG-G-CGG-AA-----TC-A--C-T--GG-GC-----TT--A----AA-GC-GT-GT-----G-TA-G-G-C-G-----G--A-CG-G-C-T-----  
AA---G-T-G-T-----C-T-T--G--TG--A-AA-TC--C-C-AC-A-G-----CT-T-AA-----C-T-G-T-G-G-A--A-C---T-G--C-T---C--G-----A--CA-T-A---C-----T--G-G--TC-G-T-C---T-T-G-A-G-C--A---A-CC---TA-G-G-----G-G-C-G--AG-C-----GG--A--ACA---A-G-T-  
G-GT--GG-A-G-CG-GT--G---A--A---TG-C-GT-AG--AT-A-TC--A-C--T-T-G-G-A-AC-G-CC--AA--T--G--GT-GAA-A--A-C--A-----G--C-T-C-G---CTG--G--GG-G-T-----T-T---G-C-T--GA--CG-C-T-G--A-GA--C-A-CG-A--AA-G-C---C-AG--GG-G--  
AG-C-A-AA-----CG--GG Bacteria(100);Planctomycetes(100);Phycisphaerae(100);WD2101(100);unclassified(100);unclassified(100);unclassified(100);unclassified(100);unclassified(100);

Otu0941 0 0 0 0 0 0 0 0 0 0 0 0 0 0 0 0 0 0 0 0 0 0 0 0 0 0 0 0 0 0  
2 0 0 0 0 0 0 0 0 0 0 0 0 0 0 0 0 0 0 0 0 0 0 0 0 0 0 0 0 0  
0 0 0 0 0 0 0 0 0 0 0 0 0 0 0 0 0 0 0 0 0 0 0 0 0 0 0 0 0 0  
0 0 0 0 0 0 0 0 0 0 0 0 0 0 0 0 0 0 0 0 0 0 0 0 1 0 0 0 0  
M02255\_76\_000000000-ADUNE\_1\_2115\_2556\_16708 T---GC--AG-AA-TAA-----GCA-C-C-----G--G--C---T--AA---C-T-CT-----GT-G--C-C--AG-CA-----GC--C-----GC-GG-TA-AT-----A-CA-G-A-G-G-----G--T-GC-T-A-A-----GC---  
-G-T-T-A-----G-A-T--G--GG--A-AA-TC--C-C-CG-G-G-----CT-T-AA-----C-C-T-G-G-G-A--A-C---T-G--C-A---T-C-----T--GA-A-A---C-----T--G-T--AG-A-G-C---T-A-G-A-G-T-A---T-GT---GA-G-A-----G-G-A-A---GG-T-----AG--A--ATT---C-C-A-G-  
GT--GT-A-G-CG-GT--G---A--A---TG-C-GT-AG--AG-A-TC--T-G--G-A-G-G-A-AT-A-CC--GA--T--G--GC-GAA-G--G-C--A-----G--C-C-T-T---CTG--G--CA-T-A-----A-T---A-C-T--GA--CA-C-T-G--A-GG--C-T-CG-A--AA-G-C---G-TG--GG-T--AG-C-  
A-AA-----CA--GG Bacteria(100);Proteobacteria(100);Gammaproteobacteria(100);Pseudomonadales(100);Moraxellaceae(100);unclassified(100);unclassified(100);unclassified(100);unclassified(100);

Otu0942 0 0 0 0 0 0 0 0 0 0 0 0 0 0 0 0 0 0 0 0 0 0 0 0 0 0 0 0 0 0  
27 0 0 0 0 0 0 0 0 0 0 0 0 0 0 0 0 0 0 0 0 0 0 0 0 0 0 0 0 0  
0 0 0 0 0 0 0 0 0 0 0 0 0 0 0 0 0 0 0 0 0 0 0 0 0 0 0 0 0 0  
6 0 0 0 0 0 0 8 0 0 0 0 0 34 0 0 0 0 0 0 0 0 0 0 0 0 0 0 0 0  
M02255\_77\_000000000-ADUT3\_1\_1104\_17099\_16574 T---AC--GT-AG-GGG-----GCA-A-G-----C--G--T---T--AT-C-CGG-AT-----TT-A--C-T--GG-GT-----GT--A----AA-GG-GA-GC-----G-TA-G-A-C-G-----G--C-AG-T-G-C---  
-----AA---G-T-C-T-----G-A-A--G--TG--A-AA-GC--C-C-GG-G-G-----CT-C-AA-----C-C-C-C-G-G-G--A-C---T-G--C-T---T--T-----G--GA-A-A---C-----T--G-T--GC--A-G-C---T-A-G-A-G-T-G---T-CG---GA-G-A-----G-G-C-A--AG-C-----GG--A--ATT---  
C-C-T-A-GT--GT-A-G-CG-GT--G---A--A---TG-C-GT-AG--AT-A-TT--A-G--G-A-G-G-A-AC-A-CC--AG--T--G--GC-GAA-G--G-C--G-----G--C-T-T-G---CTG--G--AC-G-A-----T-G---A-C-T--GA--CG-T-T-G--A-GG--C-T-CG-A--AA-G-C---G-TG--GG-  
G--AG-C-A-AA-----CA--GG Bacteria(100);Firmicutes(100);Clostridia(100);Clostridiales(100);Lachnospiraceae(100);unclassified(100);unclassified(100);unclassified(100);unclassified(100);

Otu0943 0 0 0 0 0 0 0 0 0 0 0 0 0 0 0 0 0 0 0 0 0 0 0 0 0 0 0 0 0 0  
0 0 0 0 0 0 0 50 0 0 0 0 0 0 0 0 0 0 0 0 0 0 0 0 0 0 0 0 0 0  
0 0 0 0 0 0 0 0 0 0 0 0 0 0 0 0 0 0 0 0 0 0 0 0 0 0 0 0 0 0  
0 0 0 0 0 0 0 0 0 0 0 0 0 0 0 0 0 0 0 0 0 0 0 0 0 0 0 0 0 0  
M02255\_77\_000000000-ADUT3\_1\_1102\_7831\_12093 T---AC--GA-AG-GGG-----GCT-A-G-----C--G--T---T--GT-T-CGG-AT-----TT-A--C-T--GG-GC-----GT--A----AA-GC-GC-GC-----G-TA-G-G-C-G-----G--G-CA-T-T-T-----AA-  
---G-T-C-A-----G-G-G--G--TG--A-AA-TC--C-C-AG-G-G-----CT-C-AA-----C-C-C-T-G-G-A--A-C---G-G--C-C---T--T-----T--GA-T-A---C-----T--G-G--AT--G-C-C---T-G-G-A-G-A--T---C-GG---GA-G-A-----G-G-T-T---GG-T-----GG--A--ATT---C-C-G-A-  
GT--GT-A-G-AG-GT--G---A--A---TT-C-GT-AG--AT-A-TT--C-G--G-A-G-G-A-AC-A-CC--AG--A--A--GC-GAA-G--G-C--G-----G--C-C-A-A---CTG--G--CC-C-G-----A-T---A-C-T--GA--CG-C-T-G--A-GG--C-G-CG-A--AA-G-C---G-TG--GG-G--AG-  
C-A-AA-----CA--GG Bacteria(100);Proteobacteria(100);Alphaproteobacteria(100);unclassified(100);unclassified(100);unclassified(100);unclassified(100);unclassified(100);unclassified(100);

Otu0944 0 0 0 0 0 0 0 0 0 0 0 0 0 0 0 0 0 0 0 0 0 0 0 0 0 0 0 0 0 0  
0 0 0 0 0 0 0 145 0 0 0 0 0 0 0 0 0 0 0 0 0 0 0 0 0 0 0 0 0  
0 0 0 0 0 0 0 0 0 0 0 0 0 0 0 0 0 0 0 0 0 0 0 0 0 0 0 0 0 0  
0 0 0 0 0 0 0 0 0 0 0 0 0 0 0 0 0 0 0 0 0 0 0 0 0 0 0 0 0 0  
M02255\_77\_000000000-ADUT3\_1\_1102\_7130\_8250 T---AC--GG-AG-GGG-----ACT-A-G-----C--G--T---T--GT-T-CGG-AA-----TT-A--C-T--GG-GC-----GT--A----AA-GC-GC-GC-----G-TA-G-G-C-G-----G--A-TT-T-G-C-----AA-  
---G-T-C-G-----G-G-G--G--TG--A-AA-GC--C-C-GA-G-G-----CT-C-AA-----C-C-T-C-G-G-A--A-C---T-G--C-C---T--T-----C--GA-T-A---C-----T--G-C--AA--A-T-C---T-C-G-A-G-T-C---C-GA---GA-G-A-----G-G-T-G---AG-T-----GG--A--ATT---C-C-T-A-  
GT--GT-A-G-AG-GT--G---A--A---TT-C-GT-AG--AT-A-TT--A-G--G-A-A-G-A-AC-A-CC--AG--T--G--GC-GAA-G--G-C--G-----G--C-T-C-A---CTG--G--CT-C-G-----G-T---A-C-T--GA--CG-C-T-G--A-GG--C-G-CG-A--AA-G-C---G-TG--GG-G--AG-  
C-A-AA-----CA--GG Bacteria(100);Proteobacteria(100);Alphaproteobacteria(100);Rhizobiales(100);Rhodobiaceae(100);Rhodobium(100);unclassified(100);unclassified(100);unclassified(100);



[illegible]



|         |                                              |   |   |     |    |     |     |   |   |    |                                                                                                                                                                                                                                                                                                                                                                                                                                                                                                                                                                                                   |   |   |   |   |   |   |   |   |   |   |   |   |   |   |                                                                                                                                                                               |   |  |  |  |  |  |  |  |  |  |  |  |  |  |
|---------|----------------------------------------------|---|---|-----|----|-----|-----|---|---|----|---------------------------------------------------------------------------------------------------------------------------------------------------------------------------------------------------------------------------------------------------------------------------------------------------------------------------------------------------------------------------------------------------------------------------------------------------------------------------------------------------------------------------------------------------------------------------------------------------|---|---|---|---|---|---|---|---|---|---|---|---|---|---|-------------------------------------------------------------------------------------------------------------------------------------------------------------------------------|---|--|--|--|--|--|--|--|--|--|--|--|--|--|
| Otu0950 | 0                                            | 0 | 0 | 0   | 0  | 0   | 0   | 0 | 0 | 0  | 0                                                                                                                                                                                                                                                                                                                                                                                                                                                                                                                                                                                                 | 0 | 0 | 0 | 0 | 0 | 0 | 0 | 0 | 0 | 0 | 0 | 0 | 0 | 0 | 0                                                                                                                                                                             | 0 |  |  |  |  |  |  |  |  |  |  |  |  |  |
|         | 0                                            | 0 | 1 | 2   | 0  | 0   | 0   | 0 | 0 | 75 | 0                                                                                                                                                                                                                                                                                                                                                                                                                                                                                                                                                                                                 | 0 | 0 | 0 | 0 | 0 | 0 | 0 | 0 | 0 | 0 | 0 | 0 | 0 | 0 | 0                                                                                                                                                                             | 0 |  |  |  |  |  |  |  |  |  |  |  |  |  |
|         | 0                                            | 0 | 0 | 0   | 0  | 0   | 0   | 0 | 0 | 0  | 0                                                                                                                                                                                                                                                                                                                                                                                                                                                                                                                                                                                                 | 0 | 0 | 0 | 0 | 0 | 0 | 0 | 0 | 0 | 0 | 0 | 0 | 0 | 0 | 0                                                                                                                                                                             | 0 |  |  |  |  |  |  |  |  |  |  |  |  |  |
|         | 0                                            | 0 | 0 | 0   | 0  | 0   | 0   | 0 | 0 | 0  | 0                                                                                                                                                                                                                                                                                                                                                                                                                                                                                                                                                                                                 | 0 | 0 | 0 | 0 | 0 | 0 | 0 | 0 | 0 | 0 | 0 | 0 | 0 | 0 | 0                                                                                                                                                                             | 0 |  |  |  |  |  |  |  |  |  |  |  |  |  |
|         | M02255_77_000000000-ADUT3_1_2113_21773_11991 |   |   |     |    |     |     |   |   |    | T---AC---GG-AG-GGG-----GCT-A-G-----C-G-T---T-GT-T-CGG-AA-----TT-A--C-T-GG-GC-----GT--A---AA-GG-GC-GT-----G-TA-G-G-C-G-----G-T-TT-G-C-C-----GA---G-T-C-A-----G-A-T--G-TG--A-AA-GC--C-C-CG-G-G-----CT-T-AA-----C-C-T-G-G-G-A--A-C---T-G--C-A--T-T-----T--GA-G-A--C-----T-G-G--CA--G-G-C---T-A-G-A-G-G--T---T-GG----AA-G-A-----G-G-A-G--AG-T-----GG--A--ATT-----C-C-C-A-GT--GT-A-G-AG-GT--G---A--A-A---TT-C-GT-AG--AT-A-TT--G-G--G-A-A-G-A-AC-A-CC---AG--T--G--GC-GAA-G--G-C-G-----G--C-T-C-T---CTG--G--TC-C-A-----C-A--C-C-T-GA--CG-C-T-G--A-GG--C-G-CG-A--AA-G-C--G-TG--GG-G--AG-C-A-AA-----CA--GG |   |   |   |   |   |   |   |   |   |   |   |   |   |   | Bacteria(100);Proteobacteria(100);unclassified(100);unclassified(100);unclassified(100);unclassified(100);unclassified(100);unclassified(100);unclassified(100);              |   |  |  |  |  |  |  |  |  |  |  |  |  |  |
| Otu0951 | 0                                            | 0 | 0 | 0   | 0  | 0   | 0   | 0 | 0 | 0  | 0                                                                                                                                                                                                                                                                                                                                                                                                                                                                                                                                                                                                 | 0 | 0 | 0 | 0 | 0 | 0 | 0 | 0 | 0 | 0 | 0 | 0 | 0 | 0 | 0                                                                                                                                                                             | 0 |  |  |  |  |  |  |  |  |  |  |  |  |  |
|         | 0                                            | 0 | 1 | 0   | 0  | 0   | 0   | 0 | 9 | 1  | 0                                                                                                                                                                                                                                                                                                                                                                                                                                                                                                                                                                                                 | 0 | 0 | 0 | 0 | 0 | 0 | 0 | 0 | 0 | 0 | 0 | 0 | 0 | 0 | 0                                                                                                                                                                             | 0 |  |  |  |  |  |  |  |  |  |  |  |  |  |
|         | 0                                            | 0 | 0 | 0   | 0  | 0   | 0   | 0 | 0 | 0  | 0                                                                                                                                                                                                                                                                                                                                                                                                                                                                                                                                                                                                 | 0 | 0 | 0 | 0 | 0 | 0 | 0 | 0 | 0 | 0 | 0 | 0 | 0 | 0 | 0                                                                                                                                                                             | 0 |  |  |  |  |  |  |  |  |  |  |  |  |  |
|         | 0                                            | 0 | 0 | 0   | 0  | 0   | 0   | 0 | 0 | 0  | 0                                                                                                                                                                                                                                                                                                                                                                                                                                                                                                                                                                                                 | 0 | 0 | 0 | 0 | 0 | 0 | 0 | 0 | 0 | 0 | 0 | 0 | 0 | 0 | 0                                                                                                                                                                             | 0 |  |  |  |  |  |  |  |  |  |  |  |  |  |
|         | M02255_77_000000000-ADUT3_1_2113_15047_19035 |   |   |     |    |     |     |   |   |    | T---AC---GT-AG-GGC-----GCA-A-G-----C-G--T---T-GT-C-CGG-AA-----TT-A--T-T-GG-GC-----GT--A---AA-GA-GC-TC-----G-TA-G-G-C-G-----G--T-TT-G-T-C-----GC---G-T-C-T-----G-C-C-G-TG--A-AA-AC--C-T-AG-T-G-----CT-T-AA-----C-A-C-T-G-G-G--C-G---T-G--C-G--G-T-----G--GG-T-A--C-----G--G-G--CA--G-G-C---T-A-G-A-G-T-G--T-GG----TA-G-G-----G-G-A-G--AC-T-----GG--A--ATT-----C-C-T-G-GT--GT-A-G-CG-GT--G---G--A-A---TG-C-GC-AG--AT-A-TC--A-G--G-A-G-G-A-AC-A-CC---GA--T--G--GC-GAA-G--G-C-A-----G--G-T-C-T---CTG--G--GC-C-A-----T-T--A-C-T-GA--CG-C-T-G--A-GG--A-G-CG-A--AA-G-C--A-TG--GG-T--AG-C-G-AA-----CA--GG |   |   |   |   |   |   |   |   |   |   |   |   |   |   | Bacteria(100);Actinobacteria(100);Actinobacteria(100);Actinobacteridae(100);Actinomycetales(100);Micrococcineae(100);unclassified(100);unclassified(100);unclassified(100);   |   |  |  |  |  |  |  |  |  |  |  |  |  |  |
| Otu0952 | 0                                            | 0 | 0 | 0   | 0  | 0   | 0   | 0 | 0 | 0  | 0                                                                                                                                                                                                                                                                                                                                                                                                                                                                                                                                                                                                 | 0 | 0 | 0 | 0 | 0 | 0 | 0 | 0 | 0 | 0 | 0 | 0 | 0 | 0 | 0                                                                                                                                                                             | 0 |  |  |  |  |  |  |  |  |  |  |  |  |  |
|         | 0                                            | 0 | 1 | 0   | 0  | 0   | 0   | 0 | 0 | 36 | 0                                                                                                                                                                                                                                                                                                                                                                                                                                                                                                                                                                                                 | 0 | 0 | 0 | 0 | 0 | 0 | 0 | 0 | 0 | 0 | 0 | 0 | 0 | 0 | 0                                                                                                                                                                             | 0 |  |  |  |  |  |  |  |  |  |  |  |  |  |
|         | 0                                            | 0 | 0 | 0   | 0  | 0   | 0   | 0 | 0 | 0  | 0                                                                                                                                                                                                                                                                                                                                                                                                                                                                                                                                                                                                 | 0 | 0 | 0 | 0 | 0 | 0 | 0 | 0 | 0 | 0 | 0 | 0 | 0 | 0 | 0                                                                                                                                                                             | 0 |  |  |  |  |  |  |  |  |  |  |  |  |  |
|         | 0                                            | 0 | 0 | 0   | 0  | 0   | 0   | 0 | 0 | 0  | 0                                                                                                                                                                                                                                                                                                                                                                                                                                                                                                                                                                                                 | 0 | 0 | 0 | 0 | 0 | 0 | 0 | 0 | 0 | 0 | 0 | 0 | 0 | 0 | 0                                                                                                                                                                             | 0 |  |  |  |  |  |  |  |  |  |  |  |  |  |
|         | M02255_77_000000000-ADUT3_1_2118_10573_17407 |   |   |     |    |     |     |   |   |    | T---AC---GT-AG-GAG-----GCA-A-G-----C-G--T---T-AT-C-CGG-AT-----TA-A--C-T-GG-GC-----GT--A---AA-GC-GT-GC-----G-TA-G-G-C-G-----G--T-TG-T-C-T-----AA---G-T-C-G-----C-C-T--T--TT--A-AA-GC--C-T-GG-G-G-----CT-T-AA-----C-C-C-A-G-A--T-T---T-G--G-A--G-G-----T-GA-T-A--C-----T-G-G--AT--T-A-C---T-T-G-AGG-A--T--C-GT----TC-G-G-----G-G-T-A--TC-----GG--A--ACA---G-T-T-G-GT--GT-A-G-CG-GT--G---A--A-A---TG-C-GT-TG--AT-A-TC--A-A--C-T-G-G-A-AC-A-CC---GA--A--G--GC-GAA-G--G-C-A-----G--A-T-A-C---CTG--G--AA-T-T-----T-T--C-C-T-GA--CG-C-T-G--A-GG--T-A-CG-A--AA-G-C--T-AG--GG-T--AG-C-G-AA-----AG--GG      |   |   |   |   |   |   |   |   |   |   |   |   |   |   | Bacteria(100);unclassified(100);unclassified(100);unclassified(100);unclassified(100);unclassified(100);unclassified(100);unclassified(100);unclassified(100);                |   |  |  |  |  |  |  |  |  |  |  |  |  |  |
| Otu0953 | 0                                            | 0 | 0 | 0   | 0  | 0   | 0   | 0 | 0 | 0  | 0                                                                                                                                                                                                                                                                                                                                                                                                                                                                                                                                                                                                 | 0 | 0 | 0 | 0 | 0 | 0 | 0 | 0 | 0 | 0 | 0 | 0 | 0 | 0 | 0                                                                                                                                                                             | 0 |  |  |  |  |  |  |  |  |  |  |  |  |  |
|         | 0                                            | 0 | 0 | 26  | 0  | 0   | 0   | 0 | 0 | 0  | 0                                                                                                                                                                                                                                                                                                                                                                                                                                                                                                                                                                                                 | 0 | 0 | 0 | 0 | 0 | 0 | 0 | 0 | 0 | 0 | 0 | 0 | 0 | 0 | 0                                                                                                                                                                             | 0 |  |  |  |  |  |  |  |  |  |  |  |  |  |
|         | 0                                            | 0 | 0 | 0   | 0  | 0   | 0   | 0 | 0 | 0  | 0                                                                                                                                                                                                                                                                                                                                                                                                                                                                                                                                                                                                 | 0 | 0 | 0 | 0 | 0 | 0 | 0 | 0 | 0 | 0 | 0 | 0 | 0 | 0 | 0                                                                                                                                                                             | 0 |  |  |  |  |  |  |  |  |  |  |  |  |  |
|         | 0                                            | 0 | 0 | 0   | 0  | 0   | 0   | 0 | 0 | 0  | 0                                                                                                                                                                                                                                                                                                                                                                                                                                                                                                                                                                                                 | 0 | 0 | 0 | 0 | 0 | 0 | 0 | 0 | 0 | 0 | 0 | 0 | 0 | 0 | 0                                                                                                                                                                             | 0 |  |  |  |  |  |  |  |  |  |  |  |  |  |
|         | M02255_77_000000000-ADUT3_1_1103_7402_7106   |   |   |     |    |     |     |   |   |    | T---AC---GT-AG-GTG-----GCA-A-G-----C-G--T---T-GT-C-CGG-AT-----TT-A--C-T-GG-GT-----GT--A---AA-GG-GC-GT-----G-TA-G-G-C-G-----G--G-AT-T-G-C-----AA---G-T-C-A-----G-G-C-G-TG--A-AA-AC--C-A-GG-G-G-----CT-C-AA-----C-C-T-C-T-G-G--C-C---T-G--C-G--T-T-----T--GA-A-A--C-----T-G-T-AG--T-T-C---T-T-G-A-G-T-A--C-TG---GA-G-A-----G-G-T-T--GA-C-----GG--A--ATT---C-C-T-A-GT--GT-A-G-CG-GT--G---A--A-A---TG-C-GT-AG--AT-A-TT--A-G--G-A-G-G-A-AC-A-CC---AG--T--G--GC-GAA-G--G-C-G-----G--T-C-A-A---CTG--G--AC-A-G-----C-A--A-C-T-GA--CG-C-T-G--A-GG--C-G-CG-A--AA-G-C--G-TG--GG-G--AG-C-A-AA-----CA--GG      |   |   |   |   |   |   |   |   |   |   |   |   |   |   | Bacteria(100);Firmicutes(100);Clostridia(100);Clostridiales(100);unclassified(100);unclassified(100);unclassified(100);unclassified(100);unclassified(100);unclassified(100); |   |  |  |  |  |  |  |  |  |  |  |  |  |  |
| Otu0954 | 0                                            | 0 | 0 | 0   | 0  | 0   | 0   | 0 | 0 | 0  | 0                                                                                                                                                                                                                                                                                                                                                                                                                                                                                                                                                                                                 | 0 | 0 | 0 | 0 | 0 | 0 | 0 | 0 | 0 | 0 | 0 | 0 | 0 | 0 | 0                                                                                                                                                                             | 0 |  |  |  |  |  |  |  |  |  |  |  |  |  |
|         | 0                                            | 0 | 0 | 130 | 87 | 169 | 262 | 0 | 0 | 0  | 34                                                                                                                                                                                                                                                                                                                                                                                                                                                                                                                                                                                                | 0 | 0 | 0 | 0 | 0 | 0 | 0 | 0 | 0 | 0 | 0 | 0 | 0 | 0 | 0                                                                                                                                                                             | 0 |  |  |  |  |  |  |  |  |  |  |  |  |  |
|         | 0                                            | 0 | 0 | 0   | 0  | 0   | 0   | 0 | 0 | 0  | 0                                                                                                                                                                                                                                                                                                                                                                                                                                                                                                                                                                                                 | 0 | 0 | 0 | 0 | 0 | 0 | 0 | 0 | 0 | 0 | 0 | 0 | 0 | 0 | 0                                                                                                                                                                             | 0 |  |  |  |  |  |  |  |  |  |  |  |  |  |
|         | 0                                            | 0 | 0 | 0   | 0  | 0   | 0   | 0 | 0 | 0  | 0                                                                                                                                                                                                                                                                                                                                                                                                                                                                                                                                                                                                 | 0 | 0 | 0 | 0 | 0 | 0 | 0 | 0 | 0 | 0 | 0 | 0 | 0 | 0 | 0                                                                                                                                                                             | 0 |  |  |  |  |  |  |  |  |  |  |  |  |  |
|         | M02255_77_000000000-ADUT3_1_1108_10557_11837 |   |   |     |    |     |     |   |   |    | T---AC---GT-AG-GCA-----GCA-A-G-----C-G--T---T-GT-T-CGG-AA-----TT-A--C-T-GG-GC-----GT--A---AA-GA-GT-TC-----G-TA-G-G-C-G-----G--T-GC-G-G-C-----AA---G-T-T-C-----G-G-T--G-TG--A-AA-TC--T-C-CC-G-G-----CT-C-AA-----C-T-G-G-G-A-G--G-G---T-G--C-G--C-T-----A-AA-T-A--C-----T-G-C--CG--T-G-C---T-C-G-A-G-T-A--T-AG---GA-G-A-----G-G-T-A--AG-C-----GG--A--ATT---C-C-T-G-GT--GT-A-G-CG-GT--G---A--A-A---TG-C-GT-AG--AT-A-TC--A-G--G-A-G-G-A-AC-A-CC---TG--T--G--GT-GTA-G--A-C--G-----G--C-T-T-A---CTG--G--AC-T-A-----T-A--A-C-T-GA--CG-C-T-G--A-GG--A-A-CG-A--AA-G-C--G-TG--GG-T--AG-C-A-AA-----CA--GG    |   |   |   |   |   |   |   |   |   |   |   |   |   |   | Bacteria(100);unclassified(100);unclassified(100);unclassified(100);unclassified(100);unclassified(100);unclassified(100);unclassified(100);unclassified(100);                |   |  |  |  |  |  |  |  |  |  |  |  |  |  |



Otu0955      0      0      0      0      0      0      0      0      0      0      0      0      0      0      0      0      0      0      0      0      0      0      0      0      0      0      0  
            0      0      0      33      0      0      0      0      0      0      0      0      0      0      0      0      0      0      0      0      0      0      0      0      0      0      0      0  
            0      0      0      0      0      0      0      0      0      0      0      0      0      0      0      0      0      0      0      0      0      0      0      0      0      0      0      0  
            0      0      0      0      0      0      0      0      0      0      0      0      0      0      0      0      0      0      0      0      0      0      0      0      0      0      0      0  
            M02255\_77\_000000000-ADUT3\_1\_1109\_5320\_16278 T---AC---GT-AG-GGT-----CCG-A-G-----C-G--T--T--GT-C-CGG-AG-----TT-A--C-T--GG-GC-----GT--A----AA-GC-GC-GC-----G-CA-G-G-C-G-----G-C-CG-T-T-C-----AA-  
---G-T-C-T-----G-G-C--G--TG--A-AA-GC--C-C-CC-G-G----CT-C-AA-----C-C-G-G-G-G-A--G-G---G-T--C-G--T--C-----G--GA-G-A--C-----T--G-G--GC--G-G-C---T-T-G-A-G-A-G---T-GG----CA-G-G-----G-G-C-T--GG-T-----GG--A--ATT-----CCC-  
G-GT--GT-A-G-TG-GT--G---A--A-A--TG-C-GT-AG--AG-A-TC--G-G--G-A-G-G-A-AC-A-CC---CG--T--G--GC-GAA-G--G-C-G-----G--C-C-A-G---CTG--G--GC-C-A-----C-C---T-C-T--GA--CG-C-T-G--A-GG--C-G-CG-A--AG-G-C---G-TG--GG-G--  
AG-C-G-AA-----CG--GG      Bacteria(100);Chloroflexi(100);Thermomicrobia(100);JG30-KF-CM45(100);unclassified(100);unclassified(100);unclassified(100);unclassified(100);unclassified(100);

Otu0956      0      0      0      0      0      0      0      0      0      0      0      0      0      0      0      0      0      0      0      0      0      0      0      0      0      0      0  
            0      0      0      0      0      85      0      0      0      0      0      0      0      0      0      0      0      0      0      0      0      0      0      0      0      0      0      0  
            0      0      0      0      0      0      0      0      0      0      0      0      0      0      0      0      0      0      0      0      0      0      0      0      0      0      0      0  
            0      0      0      0      0      0      0      0      0      0      0      0      0      0      0      0      0      0      0      0      0      0      0      0      0      0      0      0  
            M02255\_77\_000000000-ADUT3\_1\_1102\_16737\_8378 G---AC---GA-AG-GGC-----GCG-G-G-----T--G--T--T--AT-T-CGT-GT-----TG-A--T-T--GG-GT-----GT--A----AA-GG-GT-AG-----G-TA-G-G-C-G-----G--A-TT-C-T-A-----TT-  
---T-T-T-T-----T-T-G--G--AC--A-AA-AG--CGC-GG-A-G----TG-T-TC-----C-T-A-C-GCG-A--A-G---T-T-C-T--T--T-----T--AT-T-A--A-----A--T-G--A--G-T-C---T-T-G-T-G-T-T--A-AG----GG-G-A-----G-G-T-T---AA-G-----AC--A--ATT-----CTG-T-G-  
AG--TT-A-G-GA-GT--A---G--A-A---TC-C-TT-AT--AG-C-CA--C-G--G-A-G-G-AATG-T-CG---AT--C--G--GC-GAA-G--G-C-----A--C-T-T-T--TCC--A--AC-T-T-----T-A--A-C-A-GA--CG-C-T-G--A-GC--T-A-CG-G-AA-G-C---T-TA--GG-G--AG-C-  
A-AA-----CA--GG      Bacteria(100);unclassified(100);unclassified(100);unclassified(100);unclassified(100);unclassified(100);unclassified(100);unclassified(100);unclassified(100);

Otu0957      0      0      0      0      0      0      0      0      0      0      0      0      0      0      0      0      0      0      0      0      0      0      0      0      0      0      0  
            0      0      0      33      0      0      0      0      0      0      0      0      0      0      0      0      0      0      0      0      0      0      0      0      0      0      0      0  
            0      0      0      0      0      0      0      0      0      0      0      0      0      0      0      0      0      0      0      0      0      0      0      0      0      0      0      0  
            0      0      0      0      0      0      0      0      0      0      0      0      0      0      0      0      0      0      0      0      0      0      0      0      0      0      0      0  
            M02255\_77\_000000000-ADUT3\_1\_1112\_16452\_19966      T---AC---GT-AG-GGG-----GCA-A-G-----C-G--T--T--GT-C-CGG-AT-----TT-A--T-T--GG-GC-----GT--A----AA-GC-GC-TC-----G-CA-G-G-T-G-----G--C-TC-G-T-C-----  
-----GC---G-T-C-G-----T-G-C--G--T--GA-AA-GA--C-C-CC-G-G----CT-C-AA-----C-T-G-G-G-G-A--G-----G-GT-C-G--T--G-----C--GA-T-A--C-----G--G-G--CG--A-G-C---T-G-G-A-G-G--C---C-AG----TA-G-G-----G-G-G-A--TG-C-----GG--A--ATT-----  
C-C-G-G-GT--GT-A-G-TG-GT--G---G--A-A---TG-C-GT-AG--AG-A-TC--C-G--G-A-G-G-A-AC-A-CC---AG--C--G--GC-GAA-G--G-C-G-----G--C-A-T-C---CTG--G--AC-T-G-----G-T---C-C-T--GA--CA-C-T-C--A-GG--A-G-CG-A--AA-G-C---G-TG--  
GG-G--AG-C-G-AT-----CC--GG      Bacteria(100);unclassified(100);unclassified(100);unclassified(100);unclassified(100);unclassified(100);unclassified(100);unclassified(100);unclassified(100);

Otu0958      0      0      0      0      0      0      0      0      0      0      0      0      0      0      0      0      0      0      0      0      0      0      0      0      0      0      0  
            0      0      0      0      0      92      0      0      0      0      0      0      0      0      0      0      0      0      0      0      0      0      0      0      0      0      0      0  
            0      0      0      0      0      0      0      0      0      0      0      0      0      0      0      0      0      0      0      0      0      0      0      0      0      0      0      0  
            0      0      0      0      0      0      0      0      0      0      0      0      0      0      0      0      0      0      0      0      0      0      0      0      0      0      0      0  
            M02255\_77\_000000000-ADUT3\_1\_1101\_24443\_15950      T---AC---GA-AG-GGG-----GCG-A-G-----C-G--T--T--GT-T-CGG-AT-----TT-A--C-T--GG-GC-----GT--A----AA-GG-GC-GC-----G-CA-G-G-C-G-----G--C-GA-C-A-T----  
-----TT---G-T-C-G-----G-G-C--G--TG--A-AA-GC--C-C-CG-G-G----CT-T-AA-----C-C-T-G-G-G-A--A-C---T-G--C-G--T--T-----T--GA-T-A--C-----G--G-T--GT--G-G-C---T-A-G-A-G-T-T---C-GG----GA-G-A-----G-G-A-G--AG-T-----GG--A--ATT-----  
C-C-C-A-GT--GT-A-G-AG-GT--G---A--A-A---TT-C-GT-AG--AT-A-TT--G-G--G-A-A-G-A-AC-A-CC---GG--T--G--GC-GAA-G--G-C-G-----G--C-T-C-T---CTG--G--AC-C-G-----A-G---A-C-T--GA--CG-C-T-G--A-GG--C-G-CG-A--AA-G-C---G-TG--  
GG-G--AG-C-A-AA-----CA--GG      Bacteria(100);Proteobacteria(100);Alphaproteobacteria(100);Rhodospirillales(100);unclassified(100);unclassified(100);unclassified(100);unclassified(100);unclassified(100);

Otu0959      0      0      0      0      0      0      0      0      0      0      0      0      0      0      0      0      0      0      0      0      0      0      0      0      0      0      0  
            0      0      1      0      0      0      0      0      0      0      0      28      0      0      0      0      0      0      0      0      0      0      0      0      0      0      0      0  
            0      0      0      0      0      0      0      0      0      0      0      0      0      0      0      0      0      0      0      0      0      0      0      0      0      0      0      0  
            0      0      0      0      0      0      0      0      0      0      0      0      0      0      0      0      0      0      0      0      0      0      0      0      0      0      0      0  
            M02255\_77\_000000000-ADUT3\_1\_2109\_19306\_13180      T---AC---GT-AG-GGG-----GCA-A-G-----C-G--T--T--AT-C-CGG-AT-----TT-A--C-T--GG-GT-----GT--A----AA-GG-GA-GC-----G-TA-G-A-C-G-----G--C-GA-A-G-C----  
-----AA---G-T-C-T-----G-A-A--G--TG--A-AA-GC--C-C-GG-G-G----CT-C-AA-----C-C-G-C-G-G-G--A-C---T-G--C-T--T--T-----G--GA-A-A--C-----T--G-T--TT--T-G-C---T-G-G-A-G-T-G---C-TG----GA-G-A-----G-G-C-A--GG-C-----GG--A--ATT-----  
C-C-T-A-GT--GT-A-G-CG-GT--G---A--A-A---TG-C-GT-AG--AT-A-TT--A-G--G-A-G-G-A-AC-A-CC---AG--T--G--GC-GAA-G--G-C-G-----G--C-C-T-G---CTG--G--AC-A-G-----T-A--A-C-T--GA--CG-T-T-G--A-GG--C-T-CG-A--AA-G-C---G-TG--GG-  
G--AG-C-A-AA-----CA--GG      Bacteria(100);Firmicutes(100);Clostridia(100);Clostridiales(100);Lachnospiraceae(100);unclassified(100);unclassified(100);unclassified(100);unclassified(100);



[illegible]



|                                                                                                                                                                                                                        |   |   |   |   |     |   |   |   |   |   |    |   |   |   |   |   |    |   |   |   |   |   |   |   |   |   |   |
|------------------------------------------------------------------------------------------------------------------------------------------------------------------------------------------------------------------------|---|---|---|---|-----|---|---|---|---|---|----|---|---|---|---|---|----|---|---|---|---|---|---|---|---|---|---|
| Otu0965                                                                                                                                                                                                                | 0 | 0 | 0 | 0 | 0   | 0 | 0 | 0 | 0 | 0 | 0  | 0 | 0 | 0 | 0 | 0 | 0  | 0 | 0 | 0 | 0 | 0 | 0 | 0 | 0 | 0 | 0 |
|                                                                                                                                                                                                                        | 0 | 0 | 0 | 4 | 0   | 0 | 0 | 0 | 0 | 0 | 79 | 0 | 0 | 0 | 0 | 0 | 0  | 0 | 0 | 0 | 0 | 0 | 0 | 0 | 0 | 0 | 0 |
|                                                                                                                                                                                                                        | 0 | 0 | 0 | 0 | 0   | 0 | 0 | 0 | 0 | 0 | 0  | 0 | 0 | 0 | 0 | 0 | 0  | 0 | 0 | 0 | 0 | 0 | 0 | 0 | 0 | 0 | 0 |
|                                                                                                                                                                                                                        | 0 | 0 | 0 | 0 | 0   | 0 | 0 | 0 | 0 | 0 | 0  | 0 | 0 | 0 | 0 | 0 | 0  | 0 | 0 | 0 | 0 | 0 | 0 | 0 | 0 | 0 | 0 |
| M02255_77_000000000-ADUT3_1_1117_25795_4194 T---AC---GG-AG-GGG-----GCT-A-G-----C--G--T---T-GT-T-CGG-AA-----TT-A--C-T--GG-GC-----GT--A----AA-GC-GC-GC-----G-TA-G-G-C-G-----G--A-CC-T-G-C-----                           |   |   |   |   |     |   |   |   |   |   |    |   |   |   |   |   |    |   |   |   |   |   |   |   |   |   |   |
| AA---G-T-C-G-----G-G-G--G--TG--A-AA-GC--C-C-GA-G-G----CT-C-AA-----C-C-T-C-G-G-A-A-C---T-G-C-C---T-T-----C-GA-T-A--C-----T--G-C-GG--G-T-C---T-C-G-A-G-T-C---C-GG----GA-G-A-----G-G-T-G---AG-T-----GG--A--ATT---C-C-     |   |   |   |   |     |   |   |   |   |   |    |   |   |   |   |   |    |   |   |   |   |   |   |   |   |   |   |
| T-A-GT--GT-A-G-AG-GT--G---A--A---TT-C-GT-AG--AT-A-TT--A-G--G-A-A-G-A-AC-A-CC--AG--T--G--GC-GAA-G--G-C--G-----G--C-T-C-A--CTG--G--CC-C-G-----G-T---A-C-T--GA--CG-C-T-G--A-GG--C-G-CG-A--AA-G-C---G-TG--GG-G--           |   |   |   |   |     |   |   |   |   |   |    |   |   |   |   |   |    |   |   |   |   |   |   |   |   |   |   |
| AG-C-A-AA-----CA--GG Bacteria(100);Proteobacteria(100);Alphaproteobacteria(100);Rhizobiales(100);Rhodobiaceae(100);Rhodobium(100);unclassified(100);unclassified(100);unclassified(100);                               |   |   |   |   |     |   |   |   |   |   |    |   |   |   |   |   |    |   |   |   |   |   |   |   |   |   |   |
| Otu0966                                                                                                                                                                                                                | 0 | 0 | 0 | 0 | 0   | 0 | 0 | 0 | 0 | 0 | 0  | 0 | 0 | 0 | 0 | 0 | 0  | 0 | 0 | 0 | 0 | 0 | 0 | 0 | 0 | 0 | 0 |
|                                                                                                                                                                                                                        | 0 | 0 | 0 | 9 | 0   | 0 | 0 | 0 | 0 | 0 | 0  | 0 | 0 | 0 | 0 | 0 | 0  | 0 | 0 | 0 | 0 | 0 | 0 | 0 | 0 | 0 | 0 |
|                                                                                                                                                                                                                        | 0 | 0 | 0 | 0 | 0   | 0 | 0 | 0 | 0 | 0 | 0  | 0 | 0 | 0 | 0 | 0 | 0  | 0 | 5 | 0 | 0 | 0 | 0 | 0 | 0 | 0 | 0 |
|                                                                                                                                                                                                                        | 0 | 0 | 0 | 8 | 0   | 0 | 0 | 0 | 0 | 0 | 0  | 0 | 0 | 0 | 0 | 0 | 0  | 0 | 0 | 0 | 0 | 0 | 0 | 0 | 0 | 0 | 0 |
| M02255_76_000000000-ADUNE_1_2111_6601_12928 C---GG---CT-AA-TTC-----CGT-G-C-----C--A--G---C--AG-C-CGC-GG-----TA-A--T-A--CG-GA-----AG--G----TC-CG-GG-CG-----T-TA-T-C-C-G-----GA-T-CT-A-T-T-----AA-                       |   |   |   |   |     |   |   |   |   |   |    |   |   |   |   |   |    |   |   |   |   |   |   |   |   |   |   |
| ---G-C-G-T-----G-T-T--G--TG--A-AA-TT--T-A-CC-G-G----CT-C-AA-----C-C-G-G-T-G-G--C-T---T-G--C-A--G--C-----G--CG-A-A--C-----T--G-G--TC--G-A-C---T-T-G-A-G-T-A--T-GC---AG-G-A-----A-G-T-A--GG-C-----GG--A--ATT---C-A-T-G-  |   |   |   |   |     |   |   |   |   |   |    |   |   |   |   |   |    |   |   |   |   |   |   |   |   |   |   |
| GT--GT-A-G-CG-GT--G---A--A---TG-C-TT-AG--AT-A-TC--A-T--G-A-C-G-A-AC-T-CC--GA--T--T--GC-GCA-G--G-C-A-----G--C-T-T-A--CTG--T--AG-C-A-----T-A--A-C-T--GA--CG-C-T-G--A-TG--C-T-CG-A--AA-G-T---G-CG--GG-T--AT-C-A-          |   |   |   |   |     |   |   |   |   |   |    |   |   |   |   |   |    |   |   |   |   |   |   |   |   |   |   |
| AA-----CA--GG Bacteria(100);Bacteroidetes(100);Bacteroidia(100);Bacteroidales(100);Prevotellaceae(100);Prevotella(100);unclassified(100);unclassified(100);unclassified(100);                                          |   |   |   |   |     |   |   |   |   |   |    |   |   |   |   |   |    |   |   |   |   |   |   |   |   |   |   |
| Otu0967                                                                                                                                                                                                                | 0 | 0 | 0 | 0 | 0   | 0 | 0 | 0 | 0 | 0 | 0  | 0 | 0 | 0 | 0 | 0 | 0  | 0 | 0 | 0 | 0 | 0 | 0 | 0 | 0 | 0 | 0 |
|                                                                                                                                                                                                                        | 0 | 0 | 0 | 1 | 0   | 0 | 0 | 0 | 0 | 0 | 1  | 1 | 0 | 0 | 0 | 0 | 21 | 0 | 0 | 0 | 0 | 0 | 0 | 0 | 0 | 0 | 0 |
|                                                                                                                                                                                                                        | 0 | 0 | 0 | 0 | 0   | 0 | 0 | 0 | 0 | 0 | 0  | 0 | 0 | 0 | 0 | 0 | 0  | 0 | 0 | 0 | 0 | 0 | 0 | 0 | 0 | 0 | 0 |
|                                                                                                                                                                                                                        | 0 | 0 | 0 | 0 | 0   | 0 | 0 | 0 | 0 | 0 | 0  | 0 | 0 | 0 | 0 | 0 | 0  | 0 | 0 | 0 | 0 | 0 | 0 | 0 | 0 | 0 | 0 |
| M02255_77_000000000-ADUT3_1_1108_10465_18961 G---AC---GT-AG-GAT-----GCA-A-G-----C--G--T---T-GT-C-CGG-AT-----TT-A--T-T--GG-GC-----GT--A----AA-GA-GT-TC-----G-TA-G-G-T-G-----G--T-TT-G-T-T-----                          |   |   |   |   |     |   |   |   |   |   |    |   |   |   |   |   |    |   |   |   |   |   |   |   |   |   |   |
| ----AA---G-T-C-T-----G-A-T--G--TT--A-AA-GA--C-T-GA-G-G----CT-C-AA-----C-C-T-C-G-G-G--A-G---T-G--C-A--T-T-----G--GA-T-A--C-----T--G-G--CA--G-A-C---T-A-G-A-G-T-A--T-GG----TA-G-A-----G-G-C-A--AG-C-----GG--A--ATT---C-  |   |   |   |   |     |   |   |   |   |   |    |   |   |   |   |   |    |   |   |   |   |   |   |   |   |   |   |
| C-C-A-GT--GT-A-G-CG-GT--G---A--A---TG-C-GT-AG--AT-A-TT--G-G--G-A-A-G-A-AC-A-CC--GG--T--G--GC-GTA-G--G-C--G-----G--C-T-T-G---CTG--G--GC-C-A-----T-A--A-C-T--GA--CA-C-T-G--A-GG--A-A-CG-A--AA-G-C---C-AG--GG-            |   |   |   |   |     |   |   |   |   |   |    |   |   |   |   |   |    |   |   |   |   |   |   |   |   |   |   |
| G--AG-C-G-AA-----TG--GG Bacteria(100);Cyanobacteria(100);MLE1-12(100);unclassified(100);unclassified(100);unclassified(100);unclassified(100);unclassified(100);unclassified(100);                                     |   |   |   |   |     |   |   |   |   |   |    |   |   |   |   |   |    |   |   |   |   |   |   |   |   |   |   |
| Otu0968                                                                                                                                                                                                                | 0 | 0 | 0 | 0 | 0   | 0 | 0 | 0 | 0 | 0 | 0  | 0 | 0 | 0 | 0 | 0 | 0  | 0 | 0 | 0 | 0 | 0 | 0 | 0 | 0 | 0 | 0 |
|                                                                                                                                                                                                                        | 0 | 0 | 0 | 0 | 25  | 0 | 0 | 0 | 0 | 0 | 0  | 0 | 0 | 0 | 0 | 0 | 0  | 0 | 0 | 0 | 0 | 0 | 0 | 0 | 0 | 0 | 0 |
|                                                                                                                                                                                                                        | 0 | 0 | 0 | 0 | 0   | 0 | 0 | 0 | 0 | 0 | 0  | 0 | 0 | 0 | 0 | 0 | 0  | 0 | 0 | 0 | 0 | 0 | 0 | 0 | 0 | 0 | 0 |
|                                                                                                                                                                                                                        | 0 | 0 | 0 | 0 | 0   | 0 | 0 | 0 | 0 | 0 | 0  | 0 | 0 | 0 | 0 | 0 | 0  | 0 | 0 | 0 | 0 | 0 | 0 | 0 | 0 | 0 | 0 |
| M02255_76_000000000-ADUNE_1_1109_19496_9232 C---TA---AC-TC-CGT-----GCC-A-G-----C----A--G--CC-G-CGG-TA-----AT-A--C-G--GA-GG-----GT--G----CA--A-GC--G-----T-TA-T-T-C-G-----G--C-AA-T-T-T-----AA----                      |   |   |   |   |     |   |   |   |   |   |    |   |   |   |   |   |    |   |   |   |   |   |   |   |   |   |   |
| G-T-C-A-----G-A-T--G--TG--A-AA-GC--C-C-CG-G-G----CT-T-AA-----C-C-T-G-G-G-A-A-C---T-G--C-A--T-T-----T--GA-A-A--C-----T--G-G--AT--A-G-C---T-A-G-A-G-T-A--T-GT----TA-G-A-----G-G-A-A--GG-C-----GG--A--ATT---T-C-C-A-GT--  |   |   |   |   |     |   |   |   |   |   |    |   |   |   |   |   |    |   |   |   |   |   |   |   |   |   |   |
| GT-A-G-CA-GT--G---A--A---TG-C-GT-AG--AT-A-TT--G-G--A-A-G-G-A-AC-A-CC--GA--T--G--GC-GAA-G--G-C-A-----G--C-C-T-T---CTG--G--GG-C-A-----A-T---A-C-T--GA--CG-C-T-C--A-TG--T-G-CG-A--AA-G-C---G-TG--GG-T--AG-C-A-            |   |   |   |   |     |   |   |   |   |   |    |   |   |   |   |   |    |   |   |   |   |   |   |   |   |   |   |
| AA-----CA--GG Bacteria(100);Proteobacteria(100);Gammaproteobacteria(100);Cardiobacteriales(100);Cardiobacteriaceae(100);unclassified(100);unclassified(100);unclassified(100);unclassified(100);                       |   |   |   |   |     |   |   |   |   |   |    |   |   |   |   |   |    |   |   |   |   |   |   |   |   |   |   |
| Otu0969                                                                                                                                                                                                                | 0 | 0 | 0 | 0 | 0   | 0 | 0 | 0 | 0 | 0 | 0  | 0 | 0 | 0 | 0 | 0 | 0  | 0 | 0 | 0 | 0 | 0 | 0 | 0 | 0 | 0 | 0 |
|                                                                                                                                                                                                                        | 0 | 0 | 0 | 0 | 130 | 0 | 0 | 0 | 0 | 0 | 0  | 0 | 0 | 0 | 0 | 0 | 0  | 0 | 0 | 0 | 0 | 0 | 0 | 0 | 0 | 0 | 0 |
|                                                                                                                                                                                                                        | 0 | 0 | 0 | 0 | 0   | 0 | 0 | 0 | 0 | 0 | 0  | 0 | 0 | 0 | 0 | 0 | 0  | 0 | 0 | 0 | 0 | 0 | 0 | 0 | 0 | 0 | 0 |
|                                                                                                                                                                                                                        | 0 | 0 | 0 | 0 | 0   | 0 | 0 | 0 | 0 | 0 | 0  | 0 | 0 | 0 | 0 | 0 | 0  | 0 | 0 | 0 | 0 | 0 | 0 | 0 | 0 | 0 | 0 |
| M02255_77_000000000-ADUT3_1_1102_10338_10670 T---AC---GG-AG-GGG-----GCT-A-G-----C--G--T---T-GT-T-CGG-AA-----TT-A--C-T--GG-GC-----GT--A----AA-GC-GC-AC-----G-TA-G-G-C-G-----G--C-TT-T-G-T-----                          |   |   |   |   |     |   |   |   |   |   |    |   |   |   |   |   |    |   |   |   |   |   |   |   |   |   |   |
| -----AA---G-T-C-A-----G-A-G--G--TG--A-AA-GC--C-C-AG-G-G----CT-C-AA-----C-C-T-T-G-G-A-A-C---T-G--C-C---T-T-----T--GA-G-A--C-----T--G-C--AG--A-G-C---T-T-G-A-A-T-C---A-CG----GA-G-A-----G-G-T-G---GG-T-----GG--A--ATT--- |   |   |   |   |     |   |   |   |   |   |    |   |   |   |   |   |    |   |   |   |   |   |   |   |   |   |   |
| C-C-G-A-GT--GT-A-G-AG-GT--G---A--A---TT-C-GT-AG--AT-A-TT--C-G--G-A-A-G-A-AC-A-CC--AG--T--G--GC-GAA-G--G-C--G-----G--C-C-C-A--CTG--G--AC-G-T-----G-T---A-T-T--GA--CG-C-T-G--A-GG--T-G-CG-A--AA-G-C---G-TG--GG-          |   |   |   |   |     |   |   |   |   |   |    |   |   |   |   |   |    |   |   |   |   |   |   |   |   |   |   |
| G--AG-C-A-AA-----CA--GG Bacteria(100);Proteobacteria(100);Alphaproteobacteria(100);unclassified(100);unclassified(100);unclassified(100);unclassified(100);unclassified(100);unclassified(100);                        |   |   |   |   |     |   |   |   |   |   |    |   |   |   |   |   |    |   |   |   |   |   |   |   |   |   |   |



|                                              |                                                                                                                                                 |                                                                                                                                                                                                                          |                                                                                                                                                                                                            |                         |                                                                                                                                                                |    |    |   |   |    |   |   |   |   |   |   |   |   |   |   |   |   |   |   |   |   |
|----------------------------------------------|-------------------------------------------------------------------------------------------------------------------------------------------------|--------------------------------------------------------------------------------------------------------------------------------------------------------------------------------------------------------------------------|------------------------------------------------------------------------------------------------------------------------------------------------------------------------------------------------------------|-------------------------|----------------------------------------------------------------------------------------------------------------------------------------------------------------|----|----|---|---|----|---|---|---|---|---|---|---|---|---|---|---|---|---|---|---|---|
| Otu0970                                      | 0                                                                                                                                               | 0                                                                                                                                                                                                                        | 0                                                                                                                                                                                                          | 0                       | 0                                                                                                                                                              | 0  | 0  | 0 | 0 | 0  | 0 | 0 | 0 | 0 | 0 | 0 | 0 | 0 | 0 | 0 | 0 | 0 | 0 | 0 | 0 | 0 |
|                                              | 0                                                                                                                                               | 0                                                                                                                                                                                                                        | 0                                                                                                                                                                                                          | 0                       | 60                                                                                                                                                             | 0  | 0  | 0 | 0 | 0  | 0 | 0 | 0 | 0 | 0 | 0 | 0 | 0 | 0 | 0 | 0 | 0 | 0 | 0 | 0 | 0 |
|                                              | 0                                                                                                                                               | 0                                                                                                                                                                                                                        | 0                                                                                                                                                                                                          | 0                       | 0                                                                                                                                                              | 0  | 0  | 0 | 0 | 0  | 0 | 0 | 0 | 0 | 0 | 0 | 0 | 0 | 0 | 0 | 0 | 0 | 0 | 0 | 0 | 0 |
|                                              | 0                                                                                                                                               | 0                                                                                                                                                                                                                        | 0                                                                                                                                                                                                          | 0                       | 0                                                                                                                                                              | 0  | 0  | 0 | 0 | 0  | 0 | 0 | 0 | 0 | 0 | 0 | 0 | 0 | 0 | 0 | 0 | 0 | 0 | 0 | 0 | 0 |
| M02255_77_000000000-ADUT3_1_1106_28560_8182  | G---AC---GA-GG-GGT-----CCT-A-G-----C-G-T--T--GT-T-CGG-AA-----TT-A-C-T--GG-GC-----GT-A----AA-GC-GC-AT-----G-TA-G-G-T-T-----G--T-TT-G-A-C-----AA- | --G-T-C-A-----G-G-T--G--TG--A-AA-GC--C-T-CG-G-G----CT-T-AA-----C-C-C-G-A-G-A--A-G---T-G--C-A--T-T-----T--GA-T-A--C-----T--G-T--CA--A-T-C---T-T-G-A-A-T--A--T-GG----GA-G-A-----G-G-G-T--AG-T-----AG--A--ATT---C-C-T-G-    | GT--GT-A-G-TG-GT--G---A-A-A--TA-C-GT-AG--AT-A-TC--A-G--G-A-G-G-A-AT-A-CC--GG--A-G--GC-GAA-G-G-C-G-----G--C-T-A-C---CTG-G--CC-T-A-----A-T--A-T-T--GA--CA-C-T-G--A-GA--T-G-CG-A--AA-G-C---G-TG--GG-G--AT-C-  | A-AA-----CA--GG         | Bacteria(100);unclassified(100);unclassified(100);unclassified(100);unclassified(100);unclassified(100);unclassified(100);unclassified(100);unclassified(100); |    |    |   |   |    |   |   |   |   |   |   |   |   |   |   |   |   |   |   |   |   |
| Otu0971                                      | 0                                                                                                                                               | 0                                                                                                                                                                                                                        | 0                                                                                                                                                                                                          | 0                       | 0                                                                                                                                                              | 0  | 0  | 0 | 0 | 0  | 0 | 0 | 0 | 0 | 0 | 0 | 0 | 0 | 0 | 0 | 0 | 0 | 0 | 0 | 0 | 0 |
|                                              | 0                                                                                                                                               | 0                                                                                                                                                                                                                        | 1                                                                                                                                                                                                          | 0                       | 0                                                                                                                                                              | 0  | 0  | 0 | 0 | 29 | 0 | 0 | 0 | 0 | 0 | 0 | 0 | 0 | 0 | 0 | 0 | 0 | 0 | 0 | 0 | 0 |
|                                              | 0                                                                                                                                               | 0                                                                                                                                                                                                                        | 0                                                                                                                                                                                                          | 0                       | 0                                                                                                                                                              | 0  | 0  | 0 | 0 | 0  | 0 | 0 | 0 | 0 | 0 | 0 | 0 | 0 | 0 | 0 | 0 | 0 | 0 | 0 | 0 | 0 |
|                                              | 0                                                                                                                                               | 0                                                                                                                                                                                                                        | 0                                                                                                                                                                                                          | 0                       | 0                                                                                                                                                              | 0  | 0  | 0 | 0 | 0  | 0 | 0 | 0 | 0 | 0 | 0 | 0 | 0 | 0 | 0 | 0 | 0 | 0 | 0 | 0 | 0 |
| M02255_77_000000000-ADUT3_1_1102_18616_11835 | T---AC---GT-AG-GTG-----GCA-A-G-----C-G--T--T--GT-C-CGG-AT-----TT-A-C-T--GG-GT-----GT-A----AA-GG-GC-GT-----G-TA-G-G-C-G-----G--A-TA-A-A-T-----   | -----AA---G-T-T-G-----G-G-T--G--TG--A-AA-TAC-C--AC-G-G-----CT-C-AA-----C-C-G-T-G-G-G--G-G---T-G--C-A--T-T-----C--AA-A-A--C-----T--A-T--TT-A-C-C---T-T-G-A-G-T--G--C-TG----GA-G-A-----G-G-A-A--AG-C-----GG--A--ATT---C-   | C-T-A-GT--GT-A-G-CG-GT--G---A-A-A--TG-C-GT-AG--AT-A-TT--A-G--G-A-G-G-A-AC-A-CC--AG--T--G--GC-GAA-G-G-C-G-----G--C-T-T-T---CTG-G--AC-A-G-----T-A--A-C-T--GA--CG-C-T-G--A-GG--C-G-CG-A--AA-G-C---G-TG--GG-   | G--AG-C-A-AA-----CA--GG | Bacteria(100);unclassified(100);unclassified(100);unclassified(100);unclassified(100);unclassified(100);unclassified(100);unclassified(100);unclassified(100); |    |    |   |   |    |   |   |   |   |   |   |   |   |   |   |   |   |   |   |   |   |
| Otu0972                                      | 0                                                                                                                                               | 0                                                                                                                                                                                                                        | 0                                                                                                                                                                                                          | 0                       | 0                                                                                                                                                              | 0  | 0  | 0 | 0 | 0  | 0 | 0 | 0 | 0 | 0 | 0 | 0 | 0 | 0 | 0 | 0 | 0 | 0 | 0 | 0 | 0 |
|                                              | 0                                                                                                                                               | 0                                                                                                                                                                                                                        | 16                                                                                                                                                                                                         | 0                       | 20                                                                                                                                                             | 16 | 25 | 0 | 0 | 0  | 0 | 0 | 0 | 0 | 0 | 0 | 0 | 0 | 0 | 0 | 0 | 0 | 0 | 0 | 0 | 0 |
|                                              | 0                                                                                                                                               | 0                                                                                                                                                                                                                        | 0                                                                                                                                                                                                          | 0                       | 0                                                                                                                                                              | 0  | 0  | 0 | 0 | 0  | 0 | 0 | 0 | 0 | 0 | 0 | 0 | 0 | 0 | 0 | 0 | 0 | 0 | 0 | 0 | 0 |
|                                              | 0                                                                                                                                               | 0                                                                                                                                                                                                                        | 0                                                                                                                                                                                                          | 0                       | 0                                                                                                                                                              | 0  | 0  | 0 | 0 | 0  | 0 | 0 | 0 | 0 | 0 | 0 | 0 | 0 | 0 | 0 | 0 | 0 | 0 | 7 | 0 | 0 |
| M02255_77_000000000-ADUT3_1_1107_24657_20368 | G---AC---GT-AG-GAT-----GCA-A-G-----C-G--T--T--GT-C-CGG-AT-----TC-A--T-T--GG-GC-----GT-A----AA-GA-GT-TC-----G-TA-G-G-T-G-----G--T-TT-G-T-T-----  | -----AA---G-T-T-T-----G-G-T--G--TT--A-AA-GA--A-C-GG-G-G-----CC-T-AA-----C-C-C-C-G-G-T--A-G---T-G--C-A--C-T-----G--AA-T-A--C-----T--G-G--CA--G-A-C---T-T-G-A-G-T--G--C-GG----TA-G-A-----G-G-T-A--AG-T-----GG--A--ATT---C- | C-A-A-GT--GT-A-G-CG-GT--G---A-A-A--TG-C-AT-AG--AT-A-TT--T-G--G-A-A-G-A-AC-A-CC--GG--T--G--GC-GTA-A--G-C-G-----A-C-T-T-A---CTG-G--GC-C-G-----T-A--A-C-T--GA--CA-C-T-G--A-GG--A-A-CG-A--AA-G-C---C-GG--GG-T- | -AG-C-G-AA-----TG--GG   | Bacteria(100);unclassified(100);unclassified(100);unclassified(100);unclassified(100);unclassified(100);unclassified(100);unclassified(100);unclassified(100); |    |    |   |   |    |   |   |   |   |   |   |   |   |   |   |   |   |   |   |   |   |
| Otu0973                                      | 0                                                                                                                                               | 0                                                                                                                                                                                                                        | 0                                                                                                                                                                                                          | 0                       | 0                                                                                                                                                              | 0  | 0  | 0 | 0 | 0  | 0 | 0 | 0 | 0 | 0 | 0 | 0 | 0 | 0 | 0 | 0 | 0 | 0 | 0 | 0 | 0 |
|                                              | 0                                                                                                                                               | 0                                                                                                                                                                                                                        | 0                                                                                                                                                                                                          | 0                       | 0                                                                                                                                                              | 37 | 0  | 0 | 0 | 0  | 0 | 0 | 0 | 0 | 0 | 0 | 0 | 0 | 0 | 0 | 0 | 0 | 0 | 0 | 0 | 0 |
|                                              | 0                                                                                                                                               | 0                                                                                                                                                                                                                        | 0                                                                                                                                                                                                          | 0                       | 0                                                                                                                                                              | 0  | 0  | 0 | 0 | 0  | 0 | 0 | 0 | 0 | 0 | 0 | 0 | 0 | 0 | 0 | 0 | 0 | 0 | 0 | 0 | 0 |
|                                              | 0                                                                                                                                               | 0                                                                                                                                                                                                                        | 0                                                                                                                                                                                                          | 0                       | 0                                                                                                                                                              | 0  | 0  | 0 | 0 | 0  | 0 | 0 | 0 | 0 | 0 | 0 | 0 | 0 | 0 | 0 | 0 | 0 | 0 | 0 | 0 | 0 |
| M02255_77_000000000-ADUT3_1_1107_18083_16279 | T---AC---GT-AG-GTG-----GCA-A-G-----C-G--T--T--GT-C-CGG-AT-----TT-A--T-T--GG-GC-----GT-A----AA-GC-GC-GC-----G-CA-G-G-T-G-----G----TTCG-T-T-----  | -----GC---G-T-C-C-----G-A-G--G--TG--A-AA-TC--T-C-CC-G-G-----CT-C-AA-----C-T-G-G-G-A-G--G-----G-GT-C-T--T--C-----G--GA-T-A--C-----G--G-G                                                                                  |                                                                                                                                                                                                            |                         |                                                                                                                                                                |    |    |   |   |    |   |   |   |   |   |   |   |   |   |   |   |   |   |   |   |   |



|                                              |   |   |   |   |   |    |   |    |   |                                                                                                                                                                                                                            |   |   |   |   |   |   |    |   |   |   |   |   |   |   |   |   |   |
|----------------------------------------------|---|---|---|---|---|----|---|----|---|----------------------------------------------------------------------------------------------------------------------------------------------------------------------------------------------------------------------------|---|---|---|---|---|---|----|---|---|---|---|---|---|---|---|---|---|
| Otu0975                                      | 0 | 0 | 0 | 0 | 0 | 0  | 0 | 0  | 0 | 0                                                                                                                                                                                                                          | 0 | 0 | 0 | 0 | 0 | 0 | 0  | 0 | 0 | 0 | 0 | 0 | 0 | 0 | 0 | 0 | 0 |
|                                              | 0 | 0 | 0 | 0 | 0 | 0  | 0 | 0  | 0 | 33                                                                                                                                                                                                                         | 0 | 0 | 0 | 0 | 0 | 0 | 0  | 0 | 0 | 0 | 0 | 0 | 0 | 0 | 0 | 0 | 0 |
|                                              | 0 | 0 | 0 | 0 | 0 | 0  | 0 | 0  | 0 | 0                                                                                                                                                                                                                          | 0 | 0 | 0 | 0 | 0 | 0 | 0  | 0 | 0 | 0 | 0 | 0 | 0 | 0 | 0 | 0 | 0 |
|                                              | 0 | 0 | 0 | 0 | 0 | 0  | 0 | 0  | 0 | 0                                                                                                                                                                                                                          | 0 | 0 | 0 | 0 | 0 | 0 | 0  | 0 | 0 | 0 | 0 | 0 | 0 | 0 | 0 |   |   |
| M02255_77_000000000-ADUT3_1_1119_12795_18069 |   |   |   |   |   |    |   |    |   | T---AC---GG-AG-GGG-----GCT-A-G-----C-G--T--T--GT-T-CGG-AG-----TT-A--C-T--GG-GC-----GT--A----AA-GG-GC-GC-----G-TA-G-G-C-G-----G--C-TG-T-G-C----                                                                             |   |   |   |   |   |   |    |   |   |   |   |   |   |   |   |   |   |
|                                              |   |   |   |   |   |    |   |    |   | -----AA---G-T-C-A-----G-G-T--G--TG--A-AA-GG--C-C-CG-G-G-----CT-C-AA-----C-C-C-G-G-G--A-C---G-G--C-G--C--T-----T--GC-G-A--C-----T--G-C--AC--G-G-CT---T-G-G-A-G-T--C---C-GG----GA-G-A-----G-G-A-T---GG-T-----GG--A--ATT--    |   |   |   |   |   |   |    |   |   |   |   |   |   |   |   |   |   |
|                                              |   |   |   |   |   |    |   |    |   | --C-C-C-A-GT--GT-A-G-AG-GT--G---A--A---TT-C-GT-AG--AT-A-TT--G-G--G-A-A-G-A-AC-A-CC---GG--T--G--GC-GAA-G--G-C--G-----G--C-C-A-T--CTG--G--AC-C-G-----G-T---A-C-T--GA--CG-C-T-G--A-GG--C-G-CG-A--AA-G-C---GTGG--              |   |   |   |   |   |   |    |   |   |   |   |   |   |   |   |   |   |
|                                              |   |   |   |   |   |    |   |    |   | GG---AG-C-A-AA-----CA--GG Bacteria(100);Proteobacteria(100);Alphaproteobacteria(100);Rhodospirillales(100);unclassified(100);unclassified(100);unclassified(100);unclassified(100);unclassified(100);                      |   |   |   |   |   |   |    |   |   |   |   |   |   |   |   |   |   |
| Otu0976                                      | 0 | 0 | 0 | 0 | 0 | 0  | 0 | 0  | 0 | 0                                                                                                                                                                                                                          | 0 | 0 | 0 | 0 | 0 | 0 | 0  | 0 | 0 | 0 | 0 | 0 | 0 | 0 | 0 | 0 | 0 |
|                                              | 0 | 0 | 0 | 0 | 0 | 57 | 0 | 0  | 0 | 0                                                                                                                                                                                                                          | 0 | 0 | 0 | 0 | 0 | 0 | 0  | 0 | 0 | 0 | 0 | 0 | 0 | 0 | 0 | 0 | 0 |
|                                              | 0 | 0 | 0 | 0 | 0 | 0  | 0 | 0  | 0 | 0                                                                                                                                                                                                                          | 0 | 0 | 0 | 0 | 0 | 0 | 0  | 0 | 0 | 0 | 0 | 0 | 0 | 0 | 0 | 0 | 0 |
|                                              | 0 | 0 | 0 | 0 | 0 | 0  | 0 | 0  | 0 | 0                                                                                                                                                                                                                          | 0 | 0 | 0 | 0 | 0 | 0 | 0  | 0 | 0 | 0 | 0 | 0 | 0 | 0 | 0 | 0 | 0 |
| M02255_77_000000000-ADUT3_1_1102_6631_12227  |   |   |   |   |   |    |   |    |   | T---AC---GG-AG-GAT-----CCA-A-G-----C-G--T--T--AT-C-CGG-AA-----TT-A--C-T--GG-GC-----GT--A----AA-GA-GTTGC-----G-TA-G-G-T-G-----G--C-AT-A-G-T-----                                                                            |   |   |   |   |   |   |    |   |   |   |   |   |   |   |   |   |   |
|                                              |   |   |   |   |   |    |   |    |   | AA---G-T-A-G-----A-T-A--G--TG--A-AA-GC--G-T-GT-G-G-----CT-C-AA-----C-C-A-T-A-C-A--T-A---C-A--T-T---A--T-----C--TA-A-A--C-----T--G-C--TA--A-G-C---T-A-G-A-A-G-A--T-GA----GA-G-A-----G-G-T-A--GA-T-----GG--A--ATT---C-C-C-   |   |   |   |   |   |   |    |   |   |   |   |   |   |   |   |   |   |
|                                              |   |   |   |   |   |    |   |    |   | T-GT--GT-A-G-GA-GT--G---A--A---TC-C-GT-AG--AT-A-TA--G-G--G-A-G-G-A-AC-A-CC---GA--T--G--GC-GTA-G--G-C--A-----G--T-C-T-A--CTG--G--CT-C-A-----T-T---C-T-T--GA--CA-C-T-A--A-GG--C-A-CG-A--AA-G-C---G-TG--GG-T--AG-             |   |   |   |   |   |   |    |   |   |   |   |   |   |   |   |   |   |
|                                              |   |   |   |   |   |    |   |    |   | C-A-AA-----CG--GG Bacteria(100);unclassified(100);unclassified(100);unclassified(100);unclassified(100);unclassified(100);unclassified(100);unclassified(100);unclassified(100);                                           |   |   |   |   |   |   |    |   |   |   |   |   |   |   |   |   |   |
| Otu0977                                      | 0 | 0 | 0 | 0 | 0 | 0  | 0 | 0  | 0 | 0                                                                                                                                                                                                                          | 0 | 0 | 0 | 0 | 0 | 0 | 0  | 0 | 0 | 0 | 0 | 0 | 0 | 0 | 0 | 0 | 0 |
|                                              | 0 | 0 | 0 | 0 | 0 | 17 | 0 | 0  | 0 | 0                                                                                                                                                                                                                          | 0 | 0 | 0 | 0 | 0 | 0 | 0  | 0 | 0 | 0 | 0 | 0 | 0 | 0 | 0 | 0 | 0 |
|                                              | 0 | 0 | 0 | 0 | 0 | 0  | 0 | 0  | 0 | 0                                                                                                                                                                                                                          | 0 | 0 | 0 | 0 | 0 | 0 | 0  | 0 | 0 | 0 | 0 | 0 | 0 | 0 | 0 | 0 | 0 |
|                                              | 0 | 0 | 0 | 0 | 0 | 0  | 0 | 0  | 0 | 0                                                                                                                                                                                                                          | 0 | 0 | 0 | 0 | 0 | 0 | 0  | 0 | 0 | 0 | 0 | 0 | 0 | 0 | 0 | 0 | 0 |
| M02255_77_000000000-ADUT3_1_1102_12098_10428 |   |   |   |   |   |    |   |    |   | G---AT---AG-AG-AAT-----GCA-A-G-----T--G--T--T--AT-C-CAG-AA-----TG-A--T-T--GG-GT-----GT--A----AA-GC-AT-CT-----G-TA-G-G-T-G-----G--C-TT-T-T-T-----                                                                           |   |   |   |   |   |   |    |   |   |   |   |   |   |   |   |   |   |
|                                              |   |   |   |   |   |    |   |    |   | ---AA---G-T-C-C-----G-T-T--G--TC--A-AA-TC--C-C-AG-G-G-----CT-C-AA-----C-C-C-T-G-G-A--C-A---G-G--C-G--G--T-----G--GA-A-A--C-----T--A-C--CA--A-G-C---T-G-G-A-G-T--A--T-GG----TA-G-G-----G-A-C-A--GA-G-----GG--A--ATT---T-    |   |   |   |   |   |   |    |   |   |   |   |   |   |   |   |   |   |
|                                              |   |   |   |   |   |    |   |    |   | T-C-G-AT--AA-A-G-CG-AT--G---A--A---TG-C-GT-AG--AG-A-TC--G-A--A-A-A-G-A-AC-A-CC---AA--C--G--AT-GAA-A--G-C--A-----C--T--T-G---CTA--G--GT-C-G-----A-C---A-C-T--GA--CA-C-T-G--A-GA--G-A-TG-A--AA-G-C---T-AG--AG-G--            |   |   |   |   |   |   |    |   |   |   |   |   |   |   |   |   |   |
|                                              |   |   |   |   |   |    |   |    |   | AG-C-G-AA-----TG--GG Bacteria(100);unclassified(100);unclassified(100);unclassified(100);unclassified(100);unclassified(100);unclassified(100);unclassified(100);unclassified(100);                                        |   |   |   |   |   |   |    |   |   |   |   |   |   |   |   |   |   |
| Otu0978                                      | 0 | 0 | 0 | 0 | 0 | 0  | 0 | 0  | 0 | 0                                                                                                                                                                                                                          | 0 | 0 | 0 | 0 | 0 | 0 | 0  | 0 | 0 | 0 | 0 | 0 | 0 | 0 | 0 | 0 | 0 |
|                                              | 0 | 0 | 1 | 0 | 0 | 0  | 0 | 0  | 0 | 6                                                                                                                                                                                                                          | 0 | 0 | 0 | 0 | 0 | 0 | 21 | 0 | 0 | 0 | 0 | 0 | 0 | 0 | 0 | 0 | 0 |
|                                              | 0 | 0 | 0 | 0 | 0 | 0  | 0 | 0  | 0 | 0                                                                                                                                                                                                                          | 0 | 0 | 0 | 0 | 0 | 0 | 0  | 0 | 0 | 0 | 0 | 0 | 0 | 0 | 0 | 0 | 0 |
|                                              | 0 | 0 | 0 | 0 | 0 | 0  | 0 | 0  | 0 | 0                                                                                                                                                                                                                          | 0 | 0 | 0 | 0 | 0 | 0 | 0  | 0 | 0 | 0 | 0 | 0 | 0 | 0 | 0 | 0 | 0 |
| M02255_77_000000000-ADUT3_1_2102_9073_15933  |   |   |   |   |   |    |   |    |   | T---AC---GT-AG-GGG-----GCA-A-G-----C-G--T--T--AT-C-CGG-AT-----TT-A--C-T--GG-GT-----GT--A----AA-GG-GA-GC-----G-TA-G-A-C-G-----G--C-AT-G-G-C-----                                                                            |   |   |   |   |   |   |    |   |   |   |   |   |   |   |   |   |   |
|                                              |   |   |   |   |   |    |   |    |   | AA---G-T-C-T-----G-A-T--G--TG--A-AA-AC--T-T-GG-G-G-----CT-C-AA-----C-C-C-C-A-A-G--A-C---T-G--C-A--T--T-----G--GA-A-A--C-----T--G-T--TA--A-G-C---T-A-G-A-G-T--G---C-AG----GA-G-A-----G-G-T-A--AG-C-----GG--A--ATT---C-C-T-  |   |   |   |   |   |   |    |   |   |   |   |   |   |   |   |   |   |
|                                              |   |   |   |   |   |    |   |    |   | A-GT--GT-A-G-CG-GT--G---A--A---TG-C-GT-AG--AT-A-TT--A-G--G-A-G-G-A-AC-A-CC---AG--T--G--GC-GAA-G--G-C--G-----G--C-T-T-A--CTG--G--AC-T-G-----T-A---A-C-T--GA--CG-T-T-G--A-GG--C-T-CG-A--AA-G-C---G-TG--GG-G--                |   |   |   |   |   |   |    |   |   |   |   |   |   |   |   |   |   |
|                                              |   |   |   |   |   |    |   |    |   | AG-C-A-AA-----CA--GG Bacteria(100);Firmicutes(100);Clostridia(100);Clostridiales(100);Lachnospiraceae(100);Incertae_Sedis(100);unclassified(100);unclassified(100);unclassified(100);                                      |   |   |   |   |   |   |    |   |   |   |   |   |   |   |   |   |   |
| Otu0979                                      | 0 | 0 | 0 | 0 | 0 | 0  | 0 | 0  | 0 | 0                                                                                                                                                                                                                          | 0 | 0 | 0 | 0 | 0 | 0 | 0  | 0 | 0 | 0 | 0 | 0 | 0 | 0 | 0 | 0 | 0 |
|                                              | 0 | 0 | 0 | 0 | 0 | 0  | 0 | 22 | 0 | 0                                                                                                                                                                                                                          | 0 | 0 | 0 | 0 | 0 | 0 | 0  | 0 | 0 | 0 | 0 | 0 | 0 | 0 | 0 | 0 | 0 |
|                                              | 0 | 0 | 0 | 0 | 0 | 0  | 0 | 0  | 0 | 0                                                                                                                                                                                                                          | 0 | 0 | 0 | 0 | 0 | 0 | 0  | 0 | 0 | 0 | 0 | 0 | 0 | 0 | 0 | 0 | 0 |
|                                              | 0 | 0 | 0 | 0 | 0 | 0  | 0 | 0  | 0 | 0                                                                                                                                                                                                                          | 0 | 0 | 0 | 0 | 0 | 0 | 0  | 0 | 0 | 0 | 0 | 0 | 0 | 0 | 0 |   |   |
| M02255_76_000000000-ADUNE_1_1108_11237_24940 |   |   |   |   |   |    |   |    |   | C---GG---CT-AA-CTC-----CGT-G-C-----C--A--G---C--AG-C-CGC-GG-----TA-A--T-A--CG-GA-----GG--G----TG-CA-AG-CG-----T-TA-T-C-C-G-----G--A-TTCT-G-T-----                                                                          |   |   |   |   |   |   |    |   |   |   |   |   |   |   |   |   |   |
|                                              |   |   |   |   |   |    |   |    |   | -----AA---G-T-C-A-----G-T-G--G--TG--A-AA-TC--T-C-CG-G-G-----CT-T-AA-----C-C-C-G-G-A-A--A-C---T-G--C-C--G--T-----T--GA-T-A--C-----T--A-T--AG--A-T-C---T-T-G-A-A-T--G---T-TG----TG-G-A-----G-G-T-T--AG-C-----GG--A--ATA---T- |   |   |   |   |   |   |    |   |   |   |   |   |   |   |   |   |   |
|                                              |   |   |   |   |   |    |   |    |   | G-T-C-AT--GT-A-G-CG-GT--G---A--A---TG-C-AT-AG--AT-A-TG--A-C--A-T-A-G-A-AC-A-CC---AA--T--T--GC-GAA-G--G-C--A-----G--C-T-G-G---CTA--C--AC-A-A-----A-T---A-T-T--GA--CG-C-T-G--A-GG--C-A-CG-A--AA-G-C---G-TG--GG-G--           |   |   |   |   |   |   |    |   |   |   |   |   |   |   |   |   |   |
|                                              |   |   |   |   |   |    |   |    |   | AT-C-A-AA-----CA--GG Bacteria(100);Bacteroidetes(100);Sphingobacteria(100);Sphingobacteriales(100);Chitinophagaceae(100);Chitinophaga(100);unclassified(100);unclassified(100);unclassified(100);                          |   |   |   |   |   |   |    |   |   |   |   |   |   |   |   |   |   |



|                                                                                                                                                                                                                                                                                                                                                                                                                                                                                                                                                                                                                                                                                                                                                                                                                                |   |   |   |   |   |    |   |   |   |   |   |   |   |   |   |   |   |   |   |   |   |   |   |   |   |   |   |
|--------------------------------------------------------------------------------------------------------------------------------------------------------------------------------------------------------------------------------------------------------------------------------------------------------------------------------------------------------------------------------------------------------------------------------------------------------------------------------------------------------------------------------------------------------------------------------------------------------------------------------------------------------------------------------------------------------------------------------------------------------------------------------------------------------------------------------|---|---|---|---|---|----|---|---|---|---|---|---|---|---|---|---|---|---|---|---|---|---|---|---|---|---|---|
| Otu0980                                                                                                                                                                                                                                                                                                                                                                                                                                                                                                                                                                                                                                                                                                                                                                                                                        | 0 | 0 | 0 | 0 | 0 | 0  | 0 | 0 | 0 | 0 | 0 | 0 | 0 | 0 | 0 | 0 | 0 | 0 | 0 | 0 | 0 | 0 | 0 | 0 | 0 | 0 | 0 |
|                                                                                                                                                                                                                                                                                                                                                                                                                                                                                                                                                                                                                                                                                                                                                                                                                                | 0 | 0 | 0 | 0 | 0 | 70 | 0 | 0 | 0 | 0 | 0 | 0 | 0 | 0 | 0 | 0 | 0 | 0 | 0 | 0 | 0 | 0 | 0 | 0 | 0 | 0 | 0 |
|                                                                                                                                                                                                                                                                                                                                                                                                                                                                                                                                                                                                                                                                                                                                                                                                                                | 0 | 0 | 0 | 0 | 0 | 0  | 0 | 0 | 0 | 0 | 0 | 0 | 0 | 0 | 0 | 0 | 0 | 0 | 0 | 0 | 0 | 0 | 0 | 0 | 0 | 0 | 0 |
|                                                                                                                                                                                                                                                                                                                                                                                                                                                                                                                                                                                                                                                                                                                                                                                                                                | 0 | 0 | 0 | 0 | 0 | 0  | 0 | 0 | 0 | 0 | 0 | 0 | 0 | 0 | 0 | 0 | 0 | 0 | 0 | 0 | 0 | 0 | 0 | 0 | 0 | 0 | 0 |
| M02255_77_000000000-ADUT3_1_1101_6792_3894 T---AC---GT-AG-GGG-----GCG-A-G-----C-G-T---T-AT-C-CGG-AA-----TT-A-T-T-T-GG-GC-----GT-A-----AA-GC-GC-GC-----G-CA-G-G-C-G-----G-T-CA-T-T-T-----AA-<br>---G-T-C-A-----G-G-T-G--TG--A-AA-GG--C-T-GC-G-G----CT-C-AA-----C-C-G-C-A-G-A-G-----C-GG-C-A--C-C-----T-GA-A-A--C-----T-G-G-AT--G-A-C---T-T-G-A-G-T-G---C-AG---GA-G-A-----G-G-A-G--AG-C-----GG-A-ATT---C-C-C-G-<br>GT--GT-A-G-CG-GT--G--G--A-A---TG-C-GT-AG--AG-A-TC--G-G--G-A-G-G-A-AC-A-CC---AG-T-G--GC-GAA-G--G-C-G-----G-C-T-C-T--CTG--G--CC-T-G-----T-T---T-C-T-GA--CG-C-T-G--A-GG--C-G-CG-A-AA-G-C--G-TG--GG-G--AG-<br>C-A-AA-----CA--GG Bacteria(100);Firmicutes(100);Bacilli(100);Bacillales(100);Thermoactinomycetaceae(100);Laceyella(100);unclassified(100);unclassified(100);unclassified(100);                      |   |   |   |   |   |    |   |   |   |   |   |   |   |   |   |   |   |   |   |   |   |   |   |   |   |   |   |
| Otu0981                                                                                                                                                                                                                                                                                                                                                                                                                                                                                                                                                                                                                                                                                                                                                                                                                        | 0 | 0 | 0 | 0 | 0 | 0  | 0 | 0 | 0 | 0 | 0 | 0 | 0 | 0 | 0 | 0 | 0 | 0 | 0 | 0 | 0 | 0 | 0 | 0 | 0 | 0 | 0 |
|                                                                                                                                                                                                                                                                                                                                                                                                                                                                                                                                                                                                                                                                                                                                                                                                                                | 0 | 0 | 0 | 0 | 0 | 25 | 0 | 0 | 0 | 0 | 0 | 0 | 0 | 0 | 0 | 0 | 0 | 0 | 0 | 0 | 0 | 0 | 0 | 0 | 0 | 0 | 0 |
|                                                                                                                                                                                                                                                                                                                                                                                                                                                                                                                                                                                                                                                                                                                                                                                                                                | 0 | 0 | 0 | 0 | 0 | 0  | 0 | 0 | 0 | 0 | 0 | 0 | 0 | 0 | 0 | 0 | 0 | 0 | 0 | 0 | 0 | 0 | 0 | 0 | 0 | 0 | 0 |
|                                                                                                                                                                                                                                                                                                                                                                                                                                                                                                                                                                                                                                                                                                                                                                                                                                | 0 | 0 | 0 | 0 | 0 | 0  | 0 | 0 | 0 | 0 | 0 | 0 | 0 | 0 | 0 | 0 | 0 | 0 | 0 | 0 | 0 | 0 | 0 | 0 | 0 | 0 | 0 |
| M02255_76_000000000-ADUNE_1_1116_24723_21577 C---CG---GC-TA-ACT-----TCG-T-G-----C-C-A--G--CA-G-CCG-CG-----GT-A--A-T-AC-GA-----AG-G---GT-CC-AA-GC-----G-TT-GTT-C-G-----G-A-TC-A-G-C-----<br>-----AA---G-T-C-A-----G-A-T-G--TG--A-AA-TC--T-C-GA-A-G---CT-C-AA-----C-T-T-C-G-A-A-A-C---T-G--C-G---T-C-----T-GA-A-A--C-----T-G-C-TA--G-T-C---T-A-G-A-A-T-G---T-CG---GA-G-G-----G-G-A-T--AG-G-----GG-A-ATT---T-<br>C-A-C-GT--GT-A-G-GG-GT--A--A-A-A---TC-C-GT-AG--AG-A-TG--T-G--A-A-G-G-A-AC-A-CC---GG-A-G--GC-GAA-G--G-C-G-----C-C-T-A-T--CTG--G--AC-G-A-----C-T--A-T-T-GA--CG-C-T-G--A-GG--C-T-CG-A-AA-G-C--G-TG--GG-<br>G--AG-C-A-AA-----CA--GG Bacteria(100);Proteobacteria(100);Deltaproteobacteria(100);Bdellovibrionales(100);Bacteriovoraceae(100);Peredibacter(100);unclassified(100);unclassified(100);unclassified(100); |   |   |   |   |   |    |   |   |   |   |   |   |   |   |   |   |   |   |   |   |   |   |   |   |   |   |   |
| Otu0982                                                                                                                                                                                                                                                                                                                                                                                                                                                                                                                                                                                                                                                                                                                                                                                                                        | 0 | 0 | 0 | 0 | 0 | 0  | 0 | 0 | 0 | 0 | 0 | 0 | 0 | 0 | 0 | 0 | 0 | 0 | 0 | 0 | 0 | 0 | 0 | 0 | 0 | 0 | 0 |
|                                                                                                                                                                                                                                                                                                                                                                                                                                                                                                                                                                                                                                                                                                                                                                                                                                | 0 | 0 | 0 | 0 | 0 | 0  | 0 | 0 | 0 | 0 | 0 | 0 | 0 | 0 | 0 | 0 | 0 | 0 | 0 | 0 | 0 | 0 | 1 | 0 | 0 | 0 | 0 |
|                                                                                                                                                                                                                                                                                                                                                                                                                                                                                                                                                                                                                                                                                                                                                                                                                                | 0 | 0 | 0 | 0 | 0 | 0  | 0 | 0 | 0 | 0 | 0 | 0 | 0 | 0 | 0 | 0 | 0 | 0 | 0 | 0 | 0 | 0 | 0 | 0 | 0 | 0 | 0 |
|                                                                                                                                                                                                                                                                                                                                                                                                                                                                                                                                                                                                                                                                                                                                                                                                                                | 0 | 8 | 0 | 0 | 0 | 0  | 0 | 0 | 0 | 0 | 0 | 0 | 3 | 0 | 0 | 0 | 0 | 0 | 0 | 0 | 0 | 0 | 0 | 0 | 0 | 0 | 0 |
| M02255_76_000000000-ADUNE_1_2110_12608_23643 C---GG---CT-AA-TTC-----CGT-G-C-----C-A-G--C--AG-C-CGC-GG-----TA-A--T-A-CG-GA-----AG-G---TC-CA-GG-CG-----T-TA-T-C-C-G-----G-A-TT-T-A-T-----<br>---TA---G-C-G-T-----G-C-T-G--TG--A-AA-TA--T-A-GT-G-G---CT-C-AA-----C-C-T-C-T-A-T-C-G---T-G--C-A--G-C-----G--CG-A-A--C-----T-G-T-CG--A-A-C---T-T-G-A-G-T-G---C-GT---AG-T-A-----G-G-T-A--GG-C-----GG-A-ATT---C-G-<br>T-G-GT--GT-A-G-CG-GT--G--A-A-A---TG-C-TT-AG--AT-A-TC--A-C-G-A-A-G-A-AC-T-CC---GA-T-T--GC-GAA-G--G-C-A-----G-C-T-T-A---CCG-T-AA-C-G-----T-T--A-C-T-GA--CG-C-T-T--A-AG--C-A-CG-A--AG-G-T--G-CG--GG-T-AT-<br>C-G-AA-----CA--GG Bacteria(100);Bacteroidetes(100);Bacteroidia(100);Bacteroidales(100);unclassified(100);unclassified(100);unclassified(100);unclassified(100);unclassified(100);                      |   |   |   |   |   |    |   |   |   |   |   |   |   |   |   |   |   |   |   |   |   |   |   |   |   |   |   |
| Otu0983                                                                                                                                                                                                                                                                                                                                                                                                                                                                                                                                                                                                                                                                                                                                                                                                                        | 0 | 0 | 0 | 0 | 0 | 0  | 0 | 0 | 0 | 0 | 0 | 0 | 0 | 0 | 0 | 0 | 0 | 0 | 0 | 0 | 0 | 0 | 0 | 0 | 0 | 0 | 7 |
|                                                                                                                                                                                                                                                                                                                                                                                                                                                                                                                                                                                                                                                                                                                                                                                                                                | 0 | 0 | 0 | 0 | 0 | 0  | 0 | 0 | 0 | 0 | 0 | 0 | 0 | 0 | 0 | 0 | 0 | 0 | 0 | 0 | 0 | 0 | 0 | 0 | 0 | 0 | 0 |
|                                                                                                                                                                                                                                                                                                                                                                                                                                                                                                                                                                                                                                                                                                                                                                                                                                | 0 | 0 | 0 | 0 | 0 | 0  | 0 | 0 | 0 | 0 | 0 | 0 | 0 | 0 | 0 | 0 | 0 | 0 | 0 | 0 | 0 | 0 | 0 | 0 | 0 | 0 | 0 |
|                                                                                                                                                                                                                                                                                                                                                                                                                                                                                                                                                                                                                                                                                                                                                                                                                                | 0 | 0 | 0 | 0 | 0 | 0  | 0 | 0 | 0 | 0 | 0 | 0 | 0 | 0 | 0 | 0 | 0 | 0 | 0 | 0 | 0 | 0 | 0 | 0 | 0 | 0 | 0 |
| M02255_77_000000000-ADUT3_1_1115_13081_19849 T---AC---GG-AG-GGG-----GCT-A-G-----C-G-T---T-GT-T-CGG-AA-----TT-A-C-T-T-GG-GC-----GT-A-----AA-GG-GC-GC-----G                                                                                                                                                                                                                                                                                                                                                                                                                                                                                                                                                                                                                                                                      |   |   |   |   |   |    |   |   |   |   |   |   |   |   |   |   |   |   |   |   |   |   |   |   |   |   |   |



|                                                                                                                                                                                                                          |   |   |   |    |   |    |   |   |   |    |   |   |    |   |   |   |   |   |   |   |   |   |   |   |   |   |   |
|--------------------------------------------------------------------------------------------------------------------------------------------------------------------------------------------------------------------------|---|---|---|----|---|----|---|---|---|----|---|---|----|---|---|---|---|---|---|---|---|---|---|---|---|---|---|
| Otu0985                                                                                                                                                                                                                  | 0 | 0 | 0 | 0  | 0 | 0  | 0 | 0 | 0 | 0  | 0 | 0 | 0  | 0 | 0 | 0 | 0 | 0 | 0 | 0 | 0 | 0 | 0 | 0 | 0 | 0 | 0 |
|                                                                                                                                                                                                                          | 0 | 0 | 1 | 0  | 0 | 0  | 0 | 0 | 0 | 28 | 0 | 0 | 0  | 0 | 0 | 0 | 0 | 0 | 0 | 0 | 0 | 0 | 0 | 0 | 0 | 0 | 0 |
|                                                                                                                                                                                                                          | 0 | 0 | 0 | 0  | 0 | 0  | 0 | 0 | 0 | 0  | 0 | 0 | 0  | 0 | 0 | 0 | 0 | 0 | 0 | 0 | 0 | 0 | 0 | 0 | 0 | 0 | 0 |
|                                                                                                                                                                                                                          | 0 | 0 | 0 | 0  | 0 | 0  | 0 | 0 | 0 | 0  | 0 | 0 | 0  | 0 | 0 | 0 | 0 | 0 | 0 | 0 | 0 | 0 | 0 | 0 | 0 | 0 | 0 |
| M02255_77_000000000-ADUT3_1_1111_10354_21173 G---AC--AG-AG-GTG-----CCA-A-G-----C-G-T--T--AG-G-CGG-AA-----TC-A--C-T--GG-GC-----TT--A----AA-GC-GT-GT-----G-TA-G-G-C-G-----G--A-CT-T-C-T-----                               |   |   |   |    |   |    |   |   |   |    |   |   |    |   |   |   |   |   |   |   |   |   |   |   |   |   |   |
| -----AA----G-T-A-C-----C-T-T--G--TG--A-AA-TC--C-C-AC-G-G----CT-C-AA-----C-C-G-T-G-G-A--A-C---T-G--C-T--C-G-----G--TA-T-A--C-----T-G-G--TT--G-T-C---T-T-G-A-G-C--C--A-CT----TA-G-G-----G-G-C-T--AC-C-----GG--A--ACA---A-  |   |   |   |    |   |    |   |   |   |    |   |   |    |   |   |   |   |   |   |   |   |   |   |   |   |   |   |
| A-T-G-GT--GG-A-G-CG-GT--G---A--A-A---TG-C-GT-AG--AT-A-TC--A-T--T-T-G-G-A-AC-G-CC---AA--T--G--GT-GAA-A--A-C--A-----G--G-T-A-G---CTG--G--GA-G-T-----G-T--G-C-T--GA--CG-C-T-G--A-GA--C-A-CG-A--AA-G-C---C-AG--GG-           |   |   |   |    |   |    |   |   |   |    |   |   |    |   |   |   |   |   |   |   |   |   |   |   |   |   |   |
| G--AG-C-G-AA-----CG--GG Bacteria(100);Planctomycetes(100);Phycisphaerae(100);WD2101(100);unclassified(100);unclassified(100);unclassified(100);unclassified(100);unclassified(100);                                      |   |   |   |    |   |    |   |   |   |    |   |   |    |   |   |   |   |   |   |   |   |   |   |   |   |   |   |
| Otu0986                                                                                                                                                                                                                  | 0 | 0 | 0 | 0  | 0 | 0  | 0 | 0 | 0 | 0  | 0 | 0 | 0  | 0 | 0 | 0 | 0 | 0 | 0 | 0 | 0 | 0 | 0 | 0 | 0 | 0 | 0 |
|                                                                                                                                                                                                                          | 0 | 0 | 0 | 0  | 0 | 8  | 0 | 0 | 8 | 0  | 0 | 0 | 0  | 0 | 0 | 0 | 0 | 0 | 0 | 0 | 0 | 0 | 0 | 0 | 0 | 0 | 0 |
|                                                                                                                                                                                                                          | 0 | 0 | 0 | 0  | 0 | 0  | 0 | 0 | 0 | 0  | 0 | 0 | 0  | 0 | 0 | 0 | 0 | 0 | 0 | 0 | 0 | 0 | 0 | 0 | 0 | 0 | 0 |
|                                                                                                                                                                                                                          | 0 | 0 | 0 | 0  | 0 | 0  | 0 | 0 | 0 | 0  | 0 | 0 | 0  | 0 | 0 | 0 | 0 | 0 | 0 | 0 | 0 | 0 | 0 | 0 | 0 | 0 | 0 |
| M02255_76_000000000-ADUNE_1_1116_21605_9074 T---CC--AG-AA-GAA-----GCC-C-C-----G-G-C--T--AA-C-TAC-GT-----GC-C--A-G--CA-GC-----CG-C----GG-TA-AT-AC-----G-TA-G-G-G-G-----G--C-AA-GCG-T-----                                 |   |   |   |    |   |    |   |   |   |    |   |   |    |   |   |   |   |   |   |   |   |   |   |   |   |   |   |
| TG---T-C-C-G-----GAT-T--G--TG--A-AA-AC--T-G-GA-G-G----CT-C-AA-----C-C-T-T-C-A-G--A-G---G-T--C-G--A-C-----C--GA-A-A--C-----C-A-T--CT--G-G-C---T-A-G-A-G-T--C--C-GG---GA-G-A-----G-G-A-G--AG-T-----GG--A--ATT---C-C-       |   |   |   |    |   |    |   |   |   |    |   |   |    |   |   |   |   |   |   |   |   |   |   |   |   |   |   |
| T-G-GT--GT-A-G-CG-GT--G---A--A-A---TG-C-GC-AG--AT-A-TC--A-G--G-A-A-G-A-AC-A-CC--CG--T--G--GC-GAA-A--G-C-G-----G--C-T-C-T---CTG--G--AA-C-G-----G-T--A-C-T--GA--CG-C-T-G--A-GA--C-G-CG-A--AA-G-C---G-TG--GG-G--            |   |   |   |    |   |    |   |   |   |    |   |   |    |   |   |   |   |   |   |   |   |   |   |   |   |   |   |
| AG-C-G-AA-----CA--GG Bacteria(100);Actinobacteria(100);Actinobacteria(100);Rubrobacteridae(100);AKIW543(100);unclassified(100);unclassified(100);unclassified(100);unclassified(100);                                    |   |   |   |    |   |    |   |   |   |    |   |   |    |   |   |   |   |   |   |   |   |   |   |   |   |   |   |
| Otu0987                                                                                                                                                                                                                  | 0 | 0 | 0 | 0  | 0 | 0  | 0 | 0 | 0 | 0  | 0 | 0 | 0  | 0 | 0 | 0 | 0 | 0 | 0 | 0 | 0 | 0 | 0 | 0 | 0 | 0 | 0 |
|                                                                                                                                                                                                                          | 0 | 0 | 0 | 0  | 0 | 0  | 0 | 0 | 0 | 0  | 0 | 0 | 0  | 0 | 0 | 0 | 0 | 0 | 0 | 0 | 0 | 0 | 0 | 0 | 0 | 0 | 0 |
|                                                                                                                                                                                                                          | 0 | 0 | 0 | 0  | 0 | 0  | 0 | 0 | 0 | 0  | 0 | 0 | 0  | 0 | 0 | 0 | 0 | 0 | 0 | 0 | 0 | 0 | 0 | 0 | 0 | 9 | 0 |
|                                                                                                                                                                                                                          | 0 | 0 | 0 | 0  | 0 | 0  | 0 | 0 | 0 | 0  | 0 | 1 | 2  | 0 | 0 | 0 | 0 | 0 | 0 | 0 | 0 | 0 | 0 | 0 | 0 | 0 | 0 |
| M02255_76_000000000-ADUNE_1_1111_13896_7608 T---A---AG-CA-CCG-----GCT-A-A-----C-----T--C--TG-T-GCC-AG-----CA-G--C-C--GC-G-----GT--A---AT-AC--A-GA-----G-GG-T-G-C-G-----A--G-CT-G-T-T-----AA---                           |   |   |   |    |   |    |   |   |   |    |   |   |    |   |   |   |   |   |   |   |   |   |   |   |   |   |   |
| G-T-C-G-----G-A-T--G--TG--A-AA-TC--C-C-TG-A-G----CT-T-AA-----C-T-T-A-G-G-A--A-T---T-G--C-A--T--T-----C--GA-T-A--C-----T--G-G--GA--A-G-C---T-A-G-A-G-T--A--T-GG---GA-G-A-----G-G-A-T--GG-T-----AG--A--ATT---C-C-A-G-GT--  |   |   |   |    |   |    |   |   |   |    |   |   |    |   |   |   |   |   |   |   |   |   |   |   |   |   |   |
| GT-A-G-CG-GT--G---A--A-A---TG-C-GT-AG--AG-A-TC--T-G--G-A-G-G-A-AT-A-CC--GA--T--G--GC-GAA-G--G-C-A-----G--C-C-A-T---CTG--G--CC-T-A-----A-T--A-C-T--GA--CG-C-T-G--A-GG--T-A-CG-A--AA-G-C---A-TG--GG-G--AG-C-A-             |   |   |   |    |   |    |   |   |   |    |   |   |    |   |   |   |   |   |   |   |   |   |   |   |   |   |   |
| AA-----CA--GG Bacteria(100);Proteobacteria(100);Gammaproteobacteria(100);Pseudomonadales(100);Moraxellaceae(100);Acinetobacter(100);unclassified(100);unclassified(100);unclassified(100);                               |   |   |   |    |   |    |   |   |   |    |   |   |    |   |   |   |   |   |   |   |   |   |   |   |   |   |   |
| Otu0988                                                                                                                                                                                                                  | 0 | 0 | 0 | 0  | 0 | 0  | 0 | 0 | 0 | 0  | 0 | 0 | 0  | 0 | 0 | 0 | 0 | 0 | 0 | 0 | 0 | 0 | 0 | 0 | 0 | 0 | 0 |
|                                                                                                                                                                                                                          | 0 | 0 | 0 | 0  | 0 | 17 | 0 | 0 | 0 | 0  | 0 | 0 | 0  | 0 | 0 | 0 | 0 | 0 | 0 | 0 | 0 | 0 | 0 | 0 | 0 | 0 | 0 |
|                                                                                                                                                                                                                          | 0 | 0 | 0 | 0  | 0 | 0  | 0 | 0 | 0 | 0  | 0 | 0 | 0  | 0 | 0 | 0 | 0 | 0 | 0 | 0 | 0 | 0 | 0 | 0 | 0 | 0 | 0 |
|                                                                                                                                                                                                                          | 0 | 0 | 0 | 24 | 0 | 0  | 0 | 0 | 0 | 0  | 0 | 0 | 32 | 0 | 0 | 0 | 0 | 0 | 0 | 0 | 0 | 0 | 0 | 0 | 0 | 0 | 0 |
| M02255_77_000000000-ADUT3_1_1117_11204_14635 T---AC--GT-AG-GGA-----CCA-A-G-----C-G--T--T--GT-T-CGG-AT-----TT-A--C-T--GG-GC-----GT--A---AA-GG-GC-GC-----G-TA-G-G-C-G-----G--C-AT-G-A-C-----                               |   |   |   |    |   |    |   |   |   |    |   |   |    |   |   |   |   |   |   |   |   |   |   |   |   |   |   |
| -----AA----G-T-C-A-----C-T-T--G--TG--A-AA-TC--T-C-CG-G-G----CT-T-AA-----C-T-C-G-G-A-A--C-G---G-C--C-A--A-G-----T--GA-T-A--C-----T--G-T--CG--C-G-C---T-A-G-A-G-T--G---C-AG---AA-G-G-----G-G-C-A--AT-C-----GG--A--ATT---C- |   |   |   |    |   |    |   |   |   |    |   |   |    |   |   |   |   |   |   |   |   |   |   |   |   |   |   |
| T-T-G-GT--GT-A-G-CG-GT--G---A--A-A---TG-C-GT-AG--AT-A-TC--A-A--G-A-G-G-A-AC-A-CC--TG--A--G--GT-GAA-G--A-C-G-----G--G-T-T-G---CTG--G--GC-T-G-----A-C---A-C-T--GA--CG-C-T-G--A-GG--C-G-CG-A--AA-G-C---T-AG--GG-            |   |   |   |    |   |    |   |   |   |    |   |   |    |   |   |   |   |   |   |   |   |   |   |   |   |   |   |
| T--AG-C-A-AA-----CG--GG Bacteria(100);Acidobacteria(100);Acidobacteria(100);Acidobacteriales(100);Acidobacteriaceae(100);Candidatus_Chloroacidobacterium(100);unclassified(100);unclassified(100);unclassified(100);     |   |   |   |    |   |    |   |   |   |    |   |   |    |   |   |   |   |   |   |   |   |   |   |   |   |   |   |
| Otu0989                                                                                                                                                                                                                  | 0 | 0 | 0 | 0  | 0 | 0  | 0 | 0 | 0 | 0  | 0 | 0 | 0  | 0 | 0 | 0 | 0 | 0 | 0 | 0 | 0 | 0 | 0 | 0 | 0 | 0 | 0 |
|                                                                                                                                                                                                                          | 0 | 0 | 0 | 0  | 0 | 21 | 0 | 0 | 0 | 0  | 0 | 0 | 0  | 0 | 0 | 0 | 0 | 0 | 0 | 0 | 0 | 0 | 0 | 0 | 0 | 0 | 0 |
|                                                                                                                                                                                                                          | 0 | 0 | 0 | 0  | 0 | 0  | 0 | 0 | 0 | 0  | 0 | 0 | 0  | 0 | 0 | 0 | 0 | 0 | 0 | 0 | 0 | 0 | 0 | 0 | 0 | 0 | 0 |
|                                                                                                                                                                                                                          | 0 | 0 | 0 | 0  | 0 | 0  | 0 | 0 | 0 | 0  | 0 | 0 | 0  | 0 | 0 | 0 | 0 | 0 | 0 | 0 | 0 | 0 | 0 | 0 | 0 | 0 | 0 |
| M02255_77_000000000-ADUT3_1_2116_8294_6558 T---AC--GT-AG-GTG-----GCA-A-G-----C-G--T--T--GT-T-CGG-AT-----TT-A--C-T--GG-GC-----GT--A---AA-GA-GC-GC-----G-CA-G-G-C-G-----G--T-CG-G-A-T-----CA-                              |   |   |   |    |   |    |   |   |   |    |   |   |    |   |   |   |   |   |   |   |   |   |   |   |   |   |   |
| ---G-T-C-G-----A-A-T--G--TG--A-AA-GC--C-C-CC-G-G----CT-C-AA-----C-T-G-G-G-G-A--G-G---G-T--C-A--T--T-----C--GA-T-A--C-----T--G-T--CC--G-A-C---T-C-G-A-A-G--G---C-AG---GA-G-A-----G-G-G-A--AG-C-----GG--A--ATT---C-C-C-G-  |   |   |   |    |   |    |   |   |   |    |   |   |    |   |   |   |   |   |   |   |   |   |   |   |   |   |   |
| GT--GT-A-G-TG-GT--G---A--A-A---TG-C-GT-AG--AT-A-TC--G-G--G-A-G-G-A-AC-A-CC--AG--T--G--GC-GAA-G--G-C-G-----G--C-T-T-T---CTG--G--CC-T-G-----T-T---C-T-T--GA--CG-C-T-G--A-GG--C-G-CG-A--AA-G-C---T-AG--GG-G--AG-C-          |   |   |   |    |   |    |   |   |   |    |   |   |    |   |   |   |   |   |   |   |   |   |   |   |   |   |   |
| G-AA-----CG--GG Bacteria(100);Chloroflexi(100);KD4-96(100);unclassified(100);unclassified(100);unclassified(100);unclassified(100);unclassified(100);unclassified(100);                                                  |   |   |   |    |   |    |   |   |   |    |   |   |    |   |   |   |   |   |   |   |   |   |   |   |   |   |   |



|                                                                                                                                                                                                                                                                                                                                                                                                                                                                                                                                                                                                                                                                                                                                                                                                                      |   |   |   |   |   |    |   |   |   |    |   |   |   |   |   |   |   |   |   |   |   |   |   |   |   |   |   |
|----------------------------------------------------------------------------------------------------------------------------------------------------------------------------------------------------------------------------------------------------------------------------------------------------------------------------------------------------------------------------------------------------------------------------------------------------------------------------------------------------------------------------------------------------------------------------------------------------------------------------------------------------------------------------------------------------------------------------------------------------------------------------------------------------------------------|---|---|---|---|---|----|---|---|---|----|---|---|---|---|---|---|---|---|---|---|---|---|---|---|---|---|---|
| Otu0990                                                                                                                                                                                                                                                                                                                                                                                                                                                                                                                                                                                                                                                                                                                                                                                                              | 0 | 0 | 0 | 0 | 0 | 0  | 0 | 0 | 0 | 0  | 0 | 0 | 0 | 0 | 0 | 0 | 0 | 0 | 0 | 0 | 0 | 0 | 0 | 0 | 0 | 0 | 0 |
|                                                                                                                                                                                                                                                                                                                                                                                                                                                                                                                                                                                                                                                                                                                                                                                                                      | 0 | 0 | 0 | 0 | 0 | 31 | 0 | 0 | 0 | 0  | 0 | 0 | 0 | 0 | 0 | 0 | 0 | 0 | 0 | 0 | 0 | 0 | 0 | 0 | 0 | 0 | 0 |
|                                                                                                                                                                                                                                                                                                                                                                                                                                                                                                                                                                                                                                                                                                                                                                                                                      | 0 | 0 | 0 | 0 | 0 | 0  | 0 | 0 | 0 | 0  | 0 | 0 | 0 | 0 | 0 | 0 | 0 | 0 | 0 | 0 | 0 | 0 | 0 | 0 | 0 | 0 | 0 |
|                                                                                                                                                                                                                                                                                                                                                                                                                                                                                                                                                                                                                                                                                                                                                                                                                      | 0 | 0 | 0 | 0 | 0 | 0  | 0 | 0 | 0 | 0  | 0 | 0 | 0 | 0 | 0 | 0 | 0 | 0 | 0 | 0 | 0 | 0 | 0 | 0 | 0 | 0 | 0 |
| M02255_77_000000000-ADUT3_1_2113_26940_9890 T---AC---GT-AG-GAC-----CCA-A-G-----C-G-T---T-AT-C-CGG-AG-----TG-A-C-T-GG-GT-----GT-A---AA-GA-GTTGC-----G-TA-G-G-T-G-----G-C-TC-G-T-T-----AA-<br>---G-T-A-G-----A-T-A-G--TG--A-AA-TC--G-T-GT-G-G-----CT-C-AA-----C-C-A-T-TAC-G--G-C---T-A-T-T--A-T-----C-TA-A-A--C-----T-G-G--CG--G-G-C---T-C-G-A-G-A--A--T-GG----TA-G-A-----G-G-T-A--GC-T-----GG--A--ATT---T-C-T-A-<br>GT--GT-A-G-GA-GT--G--A-A-A--TC-C-GT-AG--AT-A-TT--A-G--A-A-G-G-A-AC-A-CC--AA--T-G--GC-GTA-G--G-C-A-----G-G-C-T-A--CTG--G--AC-C-A-----T-T--T-C-T-GA-CA-C-T-G--A-GG--C-A-CG-A--AA-G-C--G-TG--GG-G--AG-C-<br>G-AA-----CC--GG Bacteria(100);Candidate_division_TM7(100);unclassified(100);unclassified(100);unclassified(100);unclassified(100);unclassified(100);unclassified(100);unclassified(100); |   |   |   |   |   |    |   |   |   |    |   |   |   |   |   |   |   |   |   |   |   |   |   |   |   |   |   |
| Otu0991                                                                                                                                                                                                                                                                                                                                                                                                                                                                                                                                                                                                                                                                                                                                                                                                              | 0 | 0 | 0 | 0 | 0 | 0  | 0 | 0 | 0 | 0  | 0 | 0 | 0 | 0 | 0 | 0 | 0 | 0 | 0 | 0 | 0 | 0 | 0 | 0 | 0 | 0 | 0 |
|                                                                                                                                                                                                                                                                                                                                                                                                                                                                                                                                                                                                                                                                                                                                                                                                                      | 0 | 0 | 4 | 0 | 0 | 0  | 0 | 0 | 0 | 54 | 1 | 0 | 0 | 0 | 0 | 0 | 0 | 0 | 0 | 0 | 0 | 0 | 0 | 0 | 0 | 0 | 0 |
|                                                                                                                                                                                                                                                                                                                                                                                                                                                                                                                                                                                                                                                                                                                                                                                                                      | 0 | 0 | 0 | 0 | 0 | 0  | 0 | 0 | 0 | 0  | 0 | 0 | 0 | 0 | 0 | 0 | 0 | 0 | 0 | 0 | 0 | 0 | 0 | 0 | 0 | 0 | 0 |
|                                                                                                                                                                                                                                                                                                                                                                                                                                                                                                                                                                                                                                                                                                                                                                                                                      | 0 | 0 | 0 | 0 | 0 | 0  | 0 | 0 | 0 | 0  | 0 | 0 | 0 | 0 | 0 | 0 | 0 | 0 | 0 | 0 | 0 | 0 | 0 | 0 | 0 | 0 | 0 |
| M02255_76_000000000-ADUNE_1_1118_14683_6626 .....AC---T-A--CGT-----GCC-A-G-----C-A--G--C--CG-C-GGT-AA-----TA-C--G-T-AG-GG-----GG--C---AA---GC-G-----T-TG-T-C-C-G-----G--A-TA-G-T-T-----AA---G-<br>T-C-C-----G-G-T--G--TG--A-AA-GA-T-C-AG-G-G-----CT-C-AA-----C-C-C-T-G-A-G--A-G---T-G--C-A--T-C-----G-GA-A-A--C-----T-G-G--TT--A-T-C---T-T-G-A-G-G--A--C-AG----GA-G-A-----G-G-A-A--AG-T-----GG--A--ATT---C-C-T-A-GT--<br>GT-A-G-CG-GT--G--A-A-A--TG-C-GT-AG--AT-A-TT--A-G--G-A-G-G-A-AC-A-CC--AG--T-G--GC-GAA-G--G-C-G-----A-C-T-T-T--CTG--G--AC-T-G-----T-A--A-C-T-GA--CG-C-T-G--A-GG--C-G-CG-A--AA-G-C--G-TG--GG-G--AG-C-A-<br>AA-----CA--GG Bacteria(100);Firmicutes(100);Clostridia(100);Clostridiales(100);Peptococcaceae(100);Desulfosporosinus(100);unclassified(100);unclassified(100);unclassified(100);    |   |   |   |   |   |    |   |   |   |    |   |   |   |   |   |   |   |   |   |   |   |   |   |   |   |   |   |
| Otu0992                                                                                                                                                                                                                                                                                                                                                                                                                                                                                                                                                                                                                                                                                                                                                                                                              | 0 | 0 | 0 | 0 | 0 | 0  | 0 | 0 | 0 | 0  | 0 | 0 | 0 | 0 | 0 | 0 | 0 | 0 | 0 | 0 | 0 | 0 | 0 | 0 | 0 | 0 | 0 |
|                                                                                                                                                                                                                                                                                                                                                                                                                                                                                                                                                                                                                                                                                                                                                                                                                      | 0 | 0 | 0 | 0 | 0 | 23 | 0 | 0 | 0 | 0  | 0 | 0 | 0 | 0 | 0 | 0 | 0 | 0 | 0 | 0 | 0 | 0 | 0 | 0 | 0 | 0 | 0 |
|                                                                                                                                                                                                                                                                                                                                                                                                                                                                                                                                                                                                                                                                                                                                                                                                                      | 0 | 0 | 0 | 0 | 0 | 0  | 0 | 0 | 0 | 0  | 0 | 0 | 0 | 0 | 0 | 0 | 0 | 0 | 0 | 0 | 0 | 0 | 0 | 0 | 0 | 0 | 0 |
|                                                                                                                                                                                                                                                                                                                                                                                                                                                                                                                                                                                                                                                                                                                                                                                                                      | 0 | 0 | 0 | 0 | 0 | 0  | 0 | 0 | 0 | 0  | 0 | 0 | 0 | 0 | 0 | 0 | 0 | 0 | 0 | 0 | 0 | 0 | 0 | 0 | 0 | 0 | 0 |
| M02255_77_000000000-ADUT3_1_1116_23965_23976 T---AC---AG-AG-ACC-----TCA-A-G-----C-G-T---T-AT-C-CGG-AT-----TT-A-T-T-GG-GC-----GT-A---AA-GC-GT-GT-----G-TA-G-G-C-G-----G--T-CT-G-A-T-----<br>---TA---G-T-C-A-----G-A-T--G--TT--A-AA-TA-T-C-AG-G-G-----CT-C-AA-----C-C-C-T-G-A-A--C-C---A-G--C-A--T-T-----T-GA-A-A--C-----G-G-T-CA--G-A-C---T-A-G-A-G-A--A--T-GT----GA-G-A-----G-A-T-C--AG-T-----GG--A--ATT---T-A-<br>T-G-GT--GT-A-G-TA-GT--G--A-A-A--TG-C-GT-TG--AT-A-TC--A-T--A-A-A-G-A-AC-A-CC--CA--A--G--GC-GAA-G--G-C-A-----A-C-T-G-A--TTG--G--CA-C-A-----T-T--T-C-T-GA--CG-C-T-G--A-GA--C-A-CG-A--AA-G-C--G-TG--GG-G--<br>AG-C-G-AA-----TG--GG Bacteria(100);unclassified(100);unclassified(100);unclassified(100);unclassified(100);unclassified(100);unclassified(100);unclassified(100);unclassified(100);     |   |   |   |   |   |    |   |   |   |    |   |   |   |   |   |   |   |   |   |   |   |   |   |   |   |   |   |
| Otu0993                                                                                                                                                                                                                                                                                                                                                                                                                                                                                                                                                                                                                                                                                                                                                                                                              | 0 | 0 | 0 | 0 | 0 | 0  | 0 | 0 | 0 | 0  | 0 | 0 | 0 | 0 | 0 | 0 | 0 | 0 | 0 | 0 | 0 | 0 | 0 | 0 | 0 | 0 | 0 |
|                                                                                                                                                                                                                                                                                                                                                                                                                                                                                                                                                                                                                                                                                                                                                                                                                      | 0 | 0 | 0 | 0 | 0 | 49 | 0 | 0 | 0 | 0  | 0 | 0 | 0 | 0 | 0 | 0 | 0 | 0 | 0 | 0 | 0 | 0 | 0 | 0 | 0 | 0 | 0 |
|                                                                                                                                                                                                                                                                                                                                                                                                                                                                                                                                                                                                                                                                                                                                                                                                                      | 0 | 0 | 0 | 0 | 0 | 0  | 0 | 0 | 0 | 0  | 0 | 0 | 0 | 0 | 0 | 0 | 0 | 0 | 0 | 0 | 0 | 0 | 0 | 0 | 0 | 0 | 0 |
|                                                                                                                                                                                                                                                                                                                                                                                                                                                                                                                                                                                                                                                                                                                                                                                                                      | 0 | 0 | 0 | 0 | 0 | 0  | 0 | 0 | 0 | 0  | 0 | 0 | 0 | 0 | 0 | 0 | 0 | 0 | 0 | 0 | 0 | 0 | 0 | 0 | 0 | 0 | 0 |
| M02255_77_000000000-ADUT3_1_1113_12620_3061 G---AC---GG-AG-GGT-----GCT-A-G-----C-G-T---T-GT-T-CGG-AA-----TC-A--C-T-GG-GC-----GT-A---AA-GG-GC-GC-----G-TA-G-G-C                                                                                                                                                                                                                                                                                                                                                                                                                                                                                                                                                                                                                                                       |   |   |   |   |   |    |   |   |   |    |   |   |   |   |   |   |   |   |   |   |   |   |   |   |   |   |   |



|                                                                                                                                                                                                                          |   |   |   |     |   |   |   |   |   |   |    |   |   |   |    |   |    |   |   |   |   |   |   |   |   |   |   |   |
|--------------------------------------------------------------------------------------------------------------------------------------------------------------------------------------------------------------------------|---|---|---|-----|---|---|---|---|---|---|----|---|---|---|----|---|----|---|---|---|---|---|---|---|---|---|---|---|
| Otu0995                                                                                                                                                                                                                  | 0 | 0 | 0 | 0   | 0 | 0 | 0 | 0 | 0 | 0 | 0  | 0 | 0 | 0 | 0  | 0 | 0  | 0 | 0 | 0 | 0 | 0 | 0 | 0 | 0 | 0 | 0 |   |
|                                                                                                                                                                                                                          | 0 | 0 | 0 | 0   | 0 | 0 | 0 | 0 | 0 | 0 | 0  | 0 | 0 | 0 | 17 | 0 | 0  | 0 | 0 | 0 | 0 | 0 | 0 | 0 | 0 | 0 | 0 |   |
|                                                                                                                                                                                                                          | 0 | 0 | 0 | 0   | 0 | 0 | 0 | 0 | 0 | 0 | 0  | 0 | 0 | 0 | 0  | 0 | 0  | 0 | 0 | 0 | 0 | 0 | 0 | 0 | 0 | 0 | 0 |   |
|                                                                                                                                                                                                                          | 0 | 0 | 0 | 0   | 0 | 0 | 0 | 0 | 0 | 0 | 0  | 0 | 0 | 0 | 0  | 0 | 0  | 0 | 0 | 0 | 0 | 0 | 0 | 0 | 0 |   |   |   |
| M02255_77_000000000-ADUT3_1_1111_14200_12363 T---AC--GT-AG-GGT-----GCA-A-G-----C-G-T--T-GT-C-CGG-AA-----TT-A-T-T-GG-GC-----GT-A---AA-GA-GC-TC-----G-TA-G-G-C-G-----G-T-TT-G-T-C-----                                     |   |   |   |     |   |   |   |   |   |   |    |   |   |   |    |   |    |   |   |   |   |   |   |   |   |   |   |   |
| ----GC---G-T-C-G-----G-A-T--G-TG--A-AA-AC--C-C-AA-G-G----CT-C-AA-----C-C-T-T-G-G-G--C-C---T-G--C-A---T-T-----C--GA-T-A---C-----G-G-G--CA-G-A-C---T-A-G-A-G-T--T--C-GG----TA-G-G-----G-G-A-G--AC-T-----GG--A--ATT---C-    |   |   |   |     |   |   |   |   |   |   |    |   |   |   |    |   |    |   |   |   |   |   |   |   |   |   |   |   |
| C-T-G-GT--GT-A-G-CG-GT--G---A--A-A---TG-C-GC-AG--AT-A-TC--A-G--G-A-G-G-A-AC-A-CC---GG--T--G--GC-GAA-G--G-C--G-----G--G-T-C-T--CTG--G--GC-C-G-----A-T--A-C-T--GA--CG-C-T-G--A-GG--A-G-CG-A--AA-G-C---G-TG--GG-            |   |   |   |     |   |   |   |   |   |   |    |   |   |   |    |   |    |   |   |   |   |   |   |   |   |   |   |   |
| G--AG-C-G-AA-----CA--GG Bacteria(100);Actinobacteria(100);Actinobacteria(100);Actinobacteridae(100);Actinomycetales(100);unclassified(100);unclassified(100);unclassified(100);unclassified(100);                        |   |   |   |     |   |   |   |   |   |   |    |   |   |   |    |   |    |   |   |   |   |   |   |   |   |   |   |   |
| Otu0996                                                                                                                                                                                                                  | 0 | 0 | 0 | 0   | 0 | 0 | 0 | 0 | 0 | 0 | 0  | 0 | 0 | 0 | 0  | 0 | 0  | 0 | 0 | 0 | 0 | 0 | 0 | 0 | 0 | 0 | 0 |   |
|                                                                                                                                                                                                                          | 0 | 0 | 0 | 0   | 0 | 0 | 0 | 0 | 0 | 0 | 23 | 0 | 0 | 0 | 0  | 0 | 0  | 0 | 0 | 0 | 0 | 0 | 0 | 0 | 0 | 0 | 0 |   |
|                                                                                                                                                                                                                          | 0 | 0 | 0 | 0   | 0 | 0 | 0 | 0 | 0 | 0 | 0  | 0 | 0 | 0 | 0  | 0 | 0  | 0 | 0 | 0 | 0 | 0 | 0 | 0 | 0 | 0 | 0 |   |
|                                                                                                                                                                                                                          | 0 | 0 | 0 | 0   | 0 | 0 | 0 | 0 | 0 | 0 | 0  | 0 | 0 | 0 | 0  | 0 | 0  | 0 | 0 | 0 | 0 | 0 | 0 | 0 | 0 |   |   |   |
| M02255_76_000000000-ADUNE_1_1103_4841_10400 C---TA--AC-TC-CGT-----GCC-A-G-----C---A--G--CC-G-CGG-TA-----AT-A-C-G--GA-GG-----GT-G---CA-AG-CG-TT-----A-TC-C-G-G-A-----T--T-CA-C-T-T-----AA---                              |   |   |   |     |   |   |   |   |   |   |    |   |   |   |    |   |    |   |   |   |   |   |   |   |   |   |   |   |
| -G-T-C-A-----G-T-G--G--TG--A-AA-TC--T-C-CG-G-G----CT-C-AA-----C-C-C-GGA-A-A-C---T-G--C-C--A-T-----T-GA-T-A---C-----T-A-T-TT-A-T-C---T-T-G-A-A-T--T--C-TG----TT-G-A-----G-G-T-G--GG-C-----GG--A--ATA---C-A-T-C-AT--       |   |   |   |     |   |   |   |   |   |   |    |   |   |   |    |   |    |   |   |   |   |   |   |   |   |   |   |   |
| GT-A-G-CG-GT--G---A--A-A---TG-C-TT-AG--AT-A-TG--A-T--G-T-A-G-A-AC-A-CC---GA--T--T--GC-GAA-G--G-C-A-----G--C-T-C-A---CTA--A--GC-A-G-----C-G--A-T-T--GA--CG-C-T-G--A-GG--C-A-CG-A--AA-G-C---G-TG--GG-G--AT-C-A-            |   |   |   |     |   |   |   |   |   |   |    |   |   |   |    |   |    |   |   |   |   |   |   |   |   |   |   |   |
| AA-----CA--GG Bacteria(100);Bacteroidetes(100);Sphingobacteria(100);Sphingobacteriales(100);Chitinophagaceae(100);uncultured(100);unclassified(100);unclassified(100);unclassified(100);                                 |   |   |   |     |   |   |   |   |   |   |    |   |   |   |    |   |    |   |   |   |   |   |   |   |   |   |   |   |
| Otu0997                                                                                                                                                                                                                  | 0 | 0 | 0 | 0   | 0 | 0 | 0 | 0 | 0 | 0 | 0  | 0 | 0 | 0 | 0  | 0 | 0  | 0 | 0 | 0 | 0 | 0 | 0 | 0 | 0 | 0 | 0 |   |
|                                                                                                                                                                                                                          | 0 | 0 | 0 | 0   | 0 | 0 | 0 | 0 | 0 | 0 | 4  | 0 | 0 | 0 | 0  | 0 | 0  | 0 | 0 | 0 | 0 | 0 | 1 | 0 | 0 | 0 | 0 |   |
|                                                                                                                                                                                                                          | 0 | 0 | 0 | 0   | 0 | 0 | 0 | 0 | 0 | 0 | 0  | 0 | 0 | 0 | 0  | 1 | 0  | 0 | 4 | 0 | 0 | 0 | 0 | 0 | 0 | 0 | 0 |   |
|                                                                                                                                                                                                                          | 0 | 0 | 0 | 0   | 3 | 0 | 0 | 0 | 0 | 0 | 1  | 0 | 0 | 0 | 1  | 0 | 0  | 0 | 0 | 0 | 0 | 0 | 0 | 0 | 0 |   |   |   |
| M02255_76_000000000-ADUNE_1_1102_24296_16857 T---AC--GT-AG-GGG-----GCA-A-G-----C-G-T--T--AT-C-CGG-AA-----TT-A-T-T-GG-GC-----GT-----AA-A---GC-----G-T-G-G-T-A-----A-T-T-----T-----                                        |   |   |   |     |   |   |   |   |   |   |    |   |   |   |    |   |    |   |   |   |   |   |   |   |   |   |   |   |
| AA---G-C-G-C-----A-A-G--G--TT--T-AA-AC--T-A-AC-G-G----CT-C-AA-----C-C-G-T-T-A-A-A---T-G--C-C--A-T-----G--CG-A-A---C-----T-G-G-GT--T-A-C---T-T-G-A-G-T--G--C-TG----GA-G-G-----G-G-A-A--AG-C-----GG--A--ATT---C-C-T-       |   |   |   |     |   |   |   |   |   |   |    |   |   |   |    |   |    |   |   |   |   |   |   |   |   |   |   |   |
| A-GT--GT-A-G-CG-GT--G---A--A-A---TG-C-GT-AG--AT-A-TT--A-G--G-A-G-G-A-AC-A-CC---GG--C--G--GC-GAA-G--G-C--G-----G--C-T-T-T--CTG--G--AC-A-G-----C-A--A-C-T--GA--CA-C-T-G--A-GG--C-A-CG-A--AA-G-T---G-TG--GG-T--             |   |   |   |     |   |   |   |   |   |   |    |   |   |   |    |   |    |   |   |   |   |   |   |   |   |   |   |   |
| AG-C-A-AA-----CA--GG Bacteria(100);Firmicutes(100);Clostridia(100);Clostridiales(100);unclassified(100);unclassified(100);unclassified(100);unclassified(100);unclassified(100);                                         |   |   |   |     |   |   |   |   |   |   |    |   |   |   |    |   |    |   |   |   |   |   |   |   |   |   |   |   |
| Otu0998                                                                                                                                                                                                                  | 0 | 0 | 0 | 0   | 0 | 0 | 0 | 0 | 0 | 0 | 0  | 0 | 0 | 0 | 0  | 0 | 0  | 0 | 0 | 0 | 0 | 0 | 0 | 0 | 2 | 0 | 0 | 0 |
|                                                                                                                                                                                                                          | 0 | 0 | 0 | 0   | 0 | 0 | 0 | 0 | 0 | 0 | 0  | 0 | 0 | 0 | 0  | 0 | 0  | 0 | 0 | 0 | 0 | 0 | 0 | 0 | 0 | 0 | 0 |   |
|                                                                                                                                                                                                                          | 0 | 0 | 0 | 0   | 0 | 0 | 0 | 0 | 0 | 0 | 0  | 0 | 0 | 0 | 0  | 0 | 0  | 0 | 0 | 0 | 0 | 0 | 0 | 0 | 0 | 0 | 0 |   |
|                                                                                                                                                                                                                          | 0 | 0 | 0 | 679 | 0 | 0 | 0 | 0 | 0 | 0 | 0  | 0 | 0 | 0 | 0  | 0 | 0  | 0 | 0 | 0 | 0 | 0 | 0 | 0 | 0 |   |   |   |
| M02255_77_000000000-ADUT3_1_2113_18291_6674 T---AC--GA-AG-GGG-----GCT-A-G-----C--G--T--T--GT-T-CGG-AA-----TT-A-C-T--GG-GC-----GT-A---AA-GC-GC-AC-----G-CA-G-G-C-G-----G--C-TC-G-A-T-----                                 |   |   |   |     |   |   |   |   |   |   |    |   |   |   |    |   |    |   |   |   |   |   |   |   |   |   |   |   |
| AA---A-T-T-A-----G-A-A--G--TG--A-AA-GC--C-T-TG-G-G----CT-T-AA-----C-C-T-G-A-G-A--A-T---T-G--C-T--T-T-----T--AA-G-A---C-----T-G-T--CG--A-G-C---T-A-G-A-A-T--C---C-AG----AA-G-A-----G-G-G-T---AG-T-----GG--A--ATT---C-C-G- |   |   |   |     |   |   |   |   |   |   |    |   |   |   |    |   |    |   |   |   |   |   |   |   |   |   |   |   |
| A-GT--GT-A-G-AG-GT--G---A--A-A---TT-C-GT-AG--AT-A-TT--C-G--G-A-A-G-A-AC-A-CC---AG--T--G--GC-GAA-G--G-C--G-----A--C-T-A-C---CTG--G--TC-T-G-----G-C---A-T-T--GA--CG-C-T-C--A-TG--T-G-CG-A--AA-G-C---G-TG--GG-G--AG-        |   |   |   |     |   |   |   |   |   |   |    |   |   |   |    |   |    |   |   |   |   |   |   |   |   |   |   |   |
| C-A-AA-----CA--GG Bacteria(100);Proteobacteria(100);Alphaproteobacteria(100);Rhodospirillales(100);Rhodospirillaceae(100);unclassified(100);unclassified(100);unclassified(100);unclassified(100);                       |   |   |   |     |   |   |   |   |   |   |    |   |   |   |    |   |    |   |   |   |   |   |   |   |   |   |   |   |
| Otu0999                                                                                                                                                                                                                  | 0 | 0 | 0 | 0   | 0 | 0 | 0 | 0 | 0 | 0 | 0  | 0 | 0 | 0 | 0  | 0 | 0  | 0 | 0 | 0 | 0 | 0 | 0 | 0 | 0 | 0 | 0 |   |
|                                                                                                                                                                                                                          | 0 | 0 | 0 | 0   | 0 | 0 | 0 | 0 | 0 | 5 | 0  | 0 | 0 | 0 | 8  | 0 | 29 | 0 | 0 | 0 | 0 | 0 | 0 | 0 | 0 | 0 | 0 |   |
|                                                                                                                                                                                                                          | 0 | 0 | 0 | 0   | 0 | 0 | 0 | 0 | 0 | 0 | 0  | 0 | 0 | 0 | 0  | 0 | 0  | 0 | 0 | 0 | 0 | 0 | 0 | 0 | 0 | 0 | 0 |   |
|                                                                                                                                                                                                                          | 0 | 0 | 0 | 0   | 0 | 0 | 0 | 0 | 0 | 0 | 0  | 0 | 0 | 0 | 0  | 0 | 0  | 0 | 0 | 0 | 0 | 0 | 0 | 0 | 0 |   |   |   |
| M02255_76_000000000-ADUNE_1_1119_3026_12801 .....AC---T-AC-GT-----GCC-A-G-----C--A--G---C--CG-C-GGT-AA-----TA-C-G-T--AG-GT-----GG--C---AA-GC-G--TT-----G---T-C-C-G-----G--T-TT-T-T-T-----AA---G-                         |   |   |   |     |   |   |   |   |   |   |    |   |   |   |    |   |    |   |   |   |   |   |   |   |   |   |   |   |
| T-C-T-----G-A-T--G--TG--A-AA-GC--C-T-TC-G-G----CT-T-AA-----C-C-G-G-A-G-A--T-G---T-G--C-A---T-T-----G--GA-A-A---C-----T-G-G-AA--G-A-C---T-T-G-A-G-T--G--C-AG----AA-G-A-----G-G-A-G---AG-T-----GG--A--ACT---C-C-A-T-GT--   |   |   |   |     |   |   |   |   |   |   |    |   |   |   |    |   |    |   |   |   |   |   |   |   |   |   |   |   |
| GT-A-G-CG-GT--G---A--A-A---TG-C-GT-AG--AT-A-TA--T-G--G-A-A-G-A-AC-A-CC---AG--T--G--GC-GAA-A--G-C--G-----G--C-T-C-T--CTG--G--TC-T-G-----T-A---A-C-T--GA--CG-C-T-G--A-GG--T-T-CG-A--AA-G-C---A-TG--GG-T--AG-C-G-           |   |   |   |     |   |   |   |   |   |   |    |   |   |   |    |   |    |   |   |   |   |   |   |   |   |   |   |   |
| AA-----CA--GG Bacteria(100);Firmicutes(100);Bacilli(100);Lactobacillales(100);Lactobacillaceae(100);Lactobacillus(100);unclassified(100);unclassified(100);unclassified(100);                                            |   |   |   |     |   |   |   |   |   |   |    |   |   |   |    |   |    |   |   |   |   |   |   |   |   |   |   |   |



|         |                                                                                                                                                                                                                                                                                                                                                                                                                                                                                                                                                                                                                                                                                                                                                                                                                             |   |   |   |   |    |   |   |    |   |    |   |   |   |   |   |    |   |   |   |   |   |   |   |   |   |   |   |
|---------|-----------------------------------------------------------------------------------------------------------------------------------------------------------------------------------------------------------------------------------------------------------------------------------------------------------------------------------------------------------------------------------------------------------------------------------------------------------------------------------------------------------------------------------------------------------------------------------------------------------------------------------------------------------------------------------------------------------------------------------------------------------------------------------------------------------------------------|---|---|---|---|----|---|---|----|---|----|---|---|---|---|---|----|---|---|---|---|---|---|---|---|---|---|---|
| Otu1000 | 0                                                                                                                                                                                                                                                                                                                                                                                                                                                                                                                                                                                                                                                                                                                                                                                                                           | 0 | 0 | 0 | 0 | 0  | 0 | 0 | 0  | 0 | 0  | 0 | 0 | 0 | 0 | 0 | 0  | 0 | 0 | 0 | 0 | 0 | 0 | 0 | 0 | 0 | 0 |   |
|         | 0                                                                                                                                                                                                                                                                                                                                                                                                                                                                                                                                                                                                                                                                                                                                                                                                                           | 0 | 0 | 0 | 0 | 0  | 0 | 0 | 0  | 5 | 0  | 0 | 0 | 0 | 7 | 0 | 25 | 0 | 0 | 0 | 0 | 0 | 0 | 0 | 0 | 0 | 0 |   |
|         | 0                                                                                                                                                                                                                                                                                                                                                                                                                                                                                                                                                                                                                                                                                                                                                                                                                           | 0 | 0 | 0 | 0 | 0  | 0 | 0 | 0  | 0 | 0  | 0 | 0 | 0 | 0 | 0 | 0  | 0 | 0 | 0 | 0 | 0 | 0 | 0 | 0 | 0 | 0 |   |
|         | 0                                                                                                                                                                                                                                                                                                                                                                                                                                                                                                                                                                                                                                                                                                                                                                                                                           | 0 | 0 | 0 | 0 | 0  | 0 | 0 | 0  | 0 | 0  | 0 | 0 | 0 | 0 | 0 | 0  | 0 | 0 | 0 | 0 | 0 | 0 | 0 | 0 | 0 | 0 |   |
|         | M02255_77_000000000-ADUT3_1_1105_6963_14042 G---AC---GT-AG-GGT-----CCG-A-G-----C-G-T---T-GT-C-CGG-AT-----TT-A-C-T-GG-GC-----GT-A-----AA-GA-GC-GC-----G-TA-G-G-C-G-----G-C-CC-G-T-T-----AA-<br>---G-T-G-A-----G-G-A-G--TG--A-AA-GC-T-C-C-GGG-----CT-C-AA-----C-C-C-G-G-A-A-A-T---C-G-C-T---T-T-----T-CA-T-A---C-----T-G-G-CG-G-G-C---T-A-G-A-G-G-G---T-GG-----CA-G-A-----G-G-C-T---TG-T-----GG-A-ATT---C-C-T-G-<br>GT--GT-A-G-CG-GT-G---A-A-A---TG-C-GT-AG--AT-A-TC--A-G--G-A-G-G-A-AC-A-CC---CA--T--G--GC-GAA-G-G-C--A-----G-C-A-A-G---CTG--G--GC-C-G-----C-A---T-C-T-GA--CG-C-T-G--A-GG--C-G-CG-A-AA-G-C---G-TG--GG-T--AG-<br>C-A-AA-----CA--GG Bacteria(100);unclassified(100);unclassified(100);unclassified(100);unclassified(100);unclassified(100);unclassified(100);unclassified(100);unclassified(100);             |   |   |   |   |    |   |   |    |   |    |   |   |   |   |   |    |   |   |   |   |   |   |   |   |   |   |   |
| Otu1001 | 0                                                                                                                                                                                                                                                                                                                                                                                                                                                                                                                                                                                                                                                                                                                                                                                                                           | 0 | 0 | 0 | 0 | 0  | 0 | 0 | 0  | 0 | 0  | 0 | 0 | 0 | 0 | 0 | 0  | 0 | 0 | 0 | 0 | 0 | 0 | 0 | 6 | 0 | 0 | 0 |
|         | 0                                                                                                                                                                                                                                                                                                                                                                                                                                                                                                                                                                                                                                                                                                                                                                                                                           | 0 | 0 | 0 | 0 | 0  | 0 | 0 | 0  | 0 | 0  | 0 | 0 | 0 | 0 | 0 | 0  | 0 | 0 | 0 | 0 | 0 | 0 | 0 | 0 | 0 | 0 |   |
|         | 0                                                                                                                                                                                                                                                                                                                                                                                                                                                                                                                                                                                                                                                                                                                                                                                                                           | 0 | 0 | 0 | 0 | 0  | 0 | 0 | 0  | 0 | 0  | 0 | 0 | 0 | 0 | 0 | 21 | 0 | 0 | 0 | 0 | 0 | 0 | 0 | 0 | 0 | 0 |   |
|         | 0                                                                                                                                                                                                                                                                                                                                                                                                                                                                                                                                                                                                                                                                                                                                                                                                                           | 0 | 1 | 0 | 0 | 72 | 0 | 0 | 31 | 0 | 58 | 0 | 0 | 0 | 0 | 0 | 0  | 0 | 0 | 0 | 0 | 0 | 0 | 0 | 0 | 0 | 0 |   |
|         | M02255_77_000000000-ADUT3_1_2114_20544_15063 T---AC---GT-AG-GGG-----ACA-A-G-----C-G-T---T-AT-C-CGG-AA-----TT-A-C-T-GG-GC-----GT-A-----AA-GG-GT-GC-----G-CA-G-G-T-G-----G-T-CA-G-A-T-----<br>-----AA---G-T-T-A-----G-A-G--G--TT--A-AA-AG--C-A-GA-G-G---CT-C-AA-----C-C-A-C-T-G-T-C---A-G-C-C---T-T-----T-AA-A-A---C-----T-A-T-CT--G-A-C---T-T-G-A-G-T-G---C-AG---GA-G-A-----G-G-A-A--AG-A---GG-A-ATT---C-<br>C-C-G-GT--GT-A-G-CG-GT-G---A-A-A---TG-C-GT-AG--AT-A-TC--G-G--G-A-G-G-A-AT-A-CC--GG--T--G--GC-GAA-G-G-C-G-----C-C-T-T-T---CTG--G--AC-T-G-----T-A---A-C-T-GA--CA-C-T-G--A-GG--C-A-CG-A-AA-G-C---G-TG--GG-G-<br>-AG-C-A-AA-----CA--GG Bacteria(100);unclassified(100);unclassified(100);unclassified(100);unclassified(100);unclassified(100);unclassified(100);unclassified(100);unclassified(100);               |   |   |   |   |    |   |   |    |   |    |   |   |   |   |   |    |   |   |   |   |   |   |   |   |   |   |   |
| Otu1002 | 0                                                                                                                                                                                                                                                                                                                                                                                                                                                                                                                                                                                                                                                                                                                                                                                                                           | 0 | 0 | 0 | 0 | 0  | 0 | 0 | 0  | 0 | 0  | 0 | 0 | 0 | 0 | 0 | 0  | 0 | 0 | 0 | 0 | 0 | 0 | 0 | 0 | 0 | 0 |   |
|         | 0                                                                                                                                                                                                                                                                                                                                                                                                                                                                                                                                                                                                                                                                                                                                                                                                                           | 0 | 0 | 0 | 0 | 0  | 0 | 0 | 0  | 4 | 0  | 0 | 0 | 0 | 0 | 0 | 0  | 0 | 0 | 0 | 0 | 0 | 0 | 0 | 0 | 0 | 0 |   |
|         | 0                                                                                                                                                                                                                                                                                                                                                                                                                                                                                                                                                                                                                                                                                                                                                                                                                           | 0 | 0 | 0 | 0 | 0  | 0 | 7 | 0  | 0 | 0  | 0 | 0 | 0 | 0 | 0 | 0  | 0 | 0 | 0 | 0 | 0 | 0 | 0 | 0 | 0 | 0 |   |
|         | 0                                                                                                                                                                                                                                                                                                                                                                                                                                                                                                                                                                                                                                                                                                                                                                                                                           | 0 | 0 | 0 | 0 | 0  | 0 | 0 | 0  | 0 | 0  | 0 | 0 | 0 | 0 | 0 | 0  | 0 | 0 | 0 | 0 | 0 | 0 | 0 | 0 | 0 | 0 |   |
|         | M02255_77_000000000-ADUT3_1_2115_12166_10948 T---AC---GG-AG-GGT-----GCA-A-G-----C-G-T---T-AA-T-CGG-AA-----TT-A-C-T-GG-GC-----GT-A-----AA-GC-GC-AC-----G-CA-G-G-C-G-----G-T-TG-G-A-T-----<br>-----AA---G-T-T-A-----G-A-T--G--TG--A-AA-GC--C-C-CG-G-G---CT-C-AA-----C-C-T-G-G-G-A-A-T---T-G-C-A---T-T-----T-AA-A-A---C-----T-G-T-CC--A-G-C---T-A-G-A-G-T-C---T-TG---TA-G-A-----G-G-G-G---GG-T-----AG-A-ATT---C-<br>C-A-G-GT--GT-A-G-CG-GT-G---A-A-A---TG-C-GT-AG--AG-A-TC--T-G--G-A-G-G-A-AT-A-CC--GG--T--G--GC-GAA-G-G-C-G-----G-C-C-C-C---CTG--G--AC-A-A-----A-G---A-C-T-GA--CG-C-T-C--A-GG--T-G-CG-A-AA-G-C---G-TG--GG-<br>G--AG-C-A-AA-----CA--GG Bacteria(100);Proteobacteria(100);Gammaproteobacteria(100);Aeromonadales(100);Aeromonadaceae(100);Aeromonas(100);unclassified(100);unclassified(100);unclassified(100); |   |   |   |   |    |   |   |    |   |    |   |   |   |   |   |    |   |   |   |   |   |   |   |   |   |   |   |
| Otu1003 | 0                                                                                                                                                                                                                                                                                                                                                                                                                                                                                                                                                                                                                                                                                                                                                                                                                           | 0 | 0 | 0 | 0 | 0  | 0 | 0 | 0  | 0 | 0  | 0 | 0 | 0 | 0 | 0 | 0  | 0 | 0 | 0 | 0 | 0 | 0 | 0 | 0 | 0 | 0 |   |
|         | 0                                                                                                                                                                                                                                                                                                                                                                                                                                                                                                                                                                                                                                                                                                                                                                                                                           | 0 | 0 | 0 | 0 | 0  | 0 | 0 | 0  | 2 | 0  | 0 | 0 | 0 | 0 | 0 | 0  | 0 | 0 | 0 | 0 | 0 | 0 | 0 | 0 | 0 | 0 |   |
|         | 0                                                                                                                                                                                                                                                                                                                                                                                                                                                                                                                                                                                                                                                                                                                                                                                                                           | 9 | 0 | 0 | 0 | 0  | 0 | 0 | 0  | 0 | 0  | 0 | 0 | 0 | 0 | 0 | 0  | 0 | 0 | 0 | 0 | 0 | 0 | 0 | 0 | 0 | 0 |   |
|         | 0                                                                                                                                                                                                                                                                                                                                                                                                                                                                                                                                                                                                                                                                                                                                                                                                                           | 0 | 0 | 0 | 0 | 0  | 0 | 0 | 0  | 0 | 0  | 0 | 0 | 0 | 0 | 0 | 0  | 0 | 0 | 0 | 0 | 0 | 0 | 0 | 0 | 0 | 0 |   |
|         | M02255_76_000000000-ADUNE_1_2106_15640_12702 C---GG---CT-AA-TTC-----CGT-G-C-----C-A-G---C--AG-C-CGC-GG-----TA-A-T-A-CG-GA-----AG-G---TC-CT-G-GC-----G-TT-A-T                                                                                                                                                                                                                                                                                                                                                                                                                                                                                                                                                                                                                                                                |   |   |   |   |    |   |   |    |   |    |   |   |   |   |   |    |   |   |   |   |   |   |   |   |   |   |   |



|                                                                                                                                                                                                                                                                                                                                                                                                                                                                                                                                                                                                                                                                                                                                                                                                                                                |   |   |    |   |   |   |   |   |   |    |   |   |   |   |   |   |    |   |   |   |   |   |   |    |   |   |   |   |
|------------------------------------------------------------------------------------------------------------------------------------------------------------------------------------------------------------------------------------------------------------------------------------------------------------------------------------------------------------------------------------------------------------------------------------------------------------------------------------------------------------------------------------------------------------------------------------------------------------------------------------------------------------------------------------------------------------------------------------------------------------------------------------------------------------------------------------------------|---|---|----|---|---|---|---|---|---|----|---|---|---|---|---|---|----|---|---|---|---|---|---|----|---|---|---|---|
| Otu1005                                                                                                                                                                                                                                                                                                                                                                                                                                                                                                                                                                                                                                                                                                                                                                                                                                        | 0 | 0 | 0  | 0 | 0 | 0 | 0 | 0 | 0 | 0  | 0 | 0 | 0 | 0 | 0 | 0 | 0  | 0 | 0 | 0 | 0 | 0 | 0 | 0  | 4 | 0 | 0 | 0 |
|                                                                                                                                                                                                                                                                                                                                                                                                                                                                                                                                                                                                                                                                                                                                                                                                                                                | 0 | 0 | 0  | 0 | 0 | 0 | 0 | 0 | 0 | 0  | 0 | 0 | 0 | 0 | 0 | 0 | 0  | 0 | 0 | 0 | 0 | 0 | 0 | 0  | 0 | 0 | 0 | 0 |
|                                                                                                                                                                                                                                                                                                                                                                                                                                                                                                                                                                                                                                                                                                                                                                                                                                                | 0 | 0 | 0  | 0 | 0 | 0 | 0 | 0 | 0 | 0  | 0 | 0 | 0 | 0 | 0 | 0 | 0  | 0 | 0 | 0 | 0 | 0 | 0 | 0  | 0 | 0 | 0 | 0 |
|                                                                                                                                                                                                                                                                                                                                                                                                                                                                                                                                                                                                                                                                                                                                                                                                                                                | 0 | 0 | 0  | 0 | 0 | 0 | 0 | 0 | 0 | 0  | 0 | 0 | 0 | 0 | 0 | 0 | 0  | 0 | 0 | 0 | 0 | 0 | 0 | 0  | 0 | 0 |   |   |
| M02255_77_000000000-ADUT3_1_2112_18070_8917 T---AC---GT-AG-GTT-----GCG-A-G-----C-G--T--T--GT-C-CGG-AT-----TT-A--C-T--GG-GT-----GT-A----AA-GC-GC-GC-----G-CA-G-G-C-G-----G--T-CT-C-G-A-----AA-<br>---G-T-C-T-----A-C-G--G--TG--A-AA-GC--T-C-CC-G-----GC-C-CA-----A-C-T-G-G-G-A--G-A---G-G-C-C--C-G-----C--GG-A-A--A-----C-T-T--CGA-G-A-C---T-T-G-A-AGG-----C-GG-----GA-G-A-----G-GCA-A--A--T-----GG--A--ATT---T-C-C-G-<br>GT--GT-A-G-CG-GT--A---A-A---TG-C-GT-AG--AT-A-CC--G-G--A-A-G-G-A-AC-A-CC---AG--T--G--GC-GAA-G--G-C-G-----A-T-T-T-G---CTG--G--CC-C-G-----C-C--C-T-T--GA--CG-C-T-C--A-GG--C-G-CG-A-AA-G-C---T-AG--GG-G--AG-C-<br>G-AC-----CG--GG Bacteria(100);unclassified(100);unclassified(100);unclassified(100);unclassified(100);unclassified(100);unclassified(100);unclassified(100);unclassified(100);                          |   |   |    |   |   |   |   |   |   |    |   |   |   |   |   |   |    |   |   |   |   |   |   |    |   |   |   |   |
| Otu1006                                                                                                                                                                                                                                                                                                                                                                                                                                                                                                                                                                                                                                                                                                                                                                                                                                        | 0 | 0 | 0  | 0 | 0 | 0 | 0 | 0 | 0 | 0  | 0 | 0 | 0 | 0 | 0 | 0 | 0  | 0 | 0 | 0 | 0 | 0 | 0 | 0  | 3 | 0 | 0 | 0 |
|                                                                                                                                                                                                                                                                                                                                                                                                                                                                                                                                                                                                                                                                                                                                                                                                                                                | 0 | 0 | 0  | 0 | 0 | 0 | 0 | 0 | 0 | 0  | 0 | 0 | 0 | 0 | 0 | 0 | 0  | 0 | 0 | 0 | 0 | 0 | 0 | 10 | 0 | 0 | 0 | 0 |
|                                                                                                                                                                                                                                                                                                                                                                                                                                                                                                                                                                                                                                                                                                                                                                                                                                                | 0 | 0 | 0  | 0 | 0 | 0 | 0 | 0 | 0 | 0  | 0 | 0 | 0 | 0 | 0 | 0 | 0  | 0 | 0 | 0 | 0 | 0 | 0 | 0  | 0 | 0 | 0 | 0 |
|                                                                                                                                                                                                                                                                                                                                                                                                                                                                                                                                                                                                                                                                                                                                                                                                                                                | 0 | 0 | 0  | 0 | 0 | 0 | 0 | 0 | 0 | 0  | 0 | 0 | 0 | 0 | 0 | 0 | 0  | 0 | 0 | 0 | 0 | 0 | 0 | 0  | 0 | 0 |   |   |
| M02255_77_000000000-ADUT3_1_2108_23824_13018 T---AC---GT-AG-GGT-----GCA-A-G-----C-G--T--T--GT-C-CGG-AA-----TT-A--T-T--GG-GC-----GT-A----AA-GA-GC-TC-----G-TA-G-G-C-G-----G--T-CT-G-T-C-----<br>-----GC---G-T-C-G-----G-A-C--G--TG--A-AA-AT--C-C-AG-G-G-----CT-C-AA-----C-C-C-T-G-G-A-C-C---T-G--C-G---T-T-----C--GA-T-A--C-----G--G-G--CA--G-A-C---T-A-G-A-G-T--T--C-GG-----TA-G-G-----G-G-A-G---AC-T-----GG--A--ATT---C-<br>C-T-G-GT--GT-A-G-CG-GT--G---A-A-A---TG-C-GC-AG--AT-A-TC--A-G--G-A-G-G-A-AC-A-CC---GG--T--G--GC-GAA-G--G-C-G-----G--G-T-C-T---CTG--G--GC-C-G-----A-A--A-C-T--GA--CG-C-T-G--A-GG--A-G-CG-A-AA-G-C---G-TG--GG-<br>G--AG-C-A-AA-----CA--GG Bacteria(100);Actinobacteria(100);Actinobacteria(100);Actinobacteridae(100);Actinomycetales(100);unclassified(100);unclassified(100);unclassified(100);unclassified(100);  |   |   |    |   |   |   |   |   |   |    |   |   |   |   |   |   |    |   |   |   |   |   |   |    |   |   |   |   |
| Otu1007                                                                                                                                                                                                                                                                                                                                                                                                                                                                                                                                                                                                                                                                                                                                                                                                                                        | 0 | 0 | 0  | 0 | 0 | 0 | 0 | 0 | 0 | 0  | 0 | 0 | 0 | 0 | 0 | 0 | 0  | 0 | 0 | 0 | 0 | 0 | 0 | 0  | 0 | 0 | 0 | 0 |
|                                                                                                                                                                                                                                                                                                                                                                                                                                                                                                                                                                                                                                                                                                                                                                                                                                                | 0 | 0 | 0  | 0 | 0 | 0 | 0 | 0 | 0 | 21 | 0 | 0 | 0 | 0 | 0 | 0 | 0  | 0 | 0 | 0 | 0 | 0 | 0 | 0  | 0 | 0 | 0 | 0 |
|                                                                                                                                                                                                                                                                                                                                                                                                                                                                                                                                                                                                                                                                                                                                                                                                                                                | 0 | 0 | 0  | 0 | 0 | 0 | 0 | 0 | 0 | 0  | 0 | 0 | 0 | 0 | 0 | 0 | 0  | 0 | 0 | 0 | 0 | 0 | 0 | 0  | 0 | 0 | 0 | 0 |
|                                                                                                                                                                                                                                                                                                                                                                                                                                                                                                                                                                                                                                                                                                                                                                                                                                                | 0 | 0 | 0  | 0 | 0 | 0 | 0 | 0 | 0 | 0  | 0 | 0 | 0 | 0 | 0 | 0 | 0  | 0 | 0 | 0 | 0 | 0 | 0 | 0  | 0 | 0 |   |   |
| M02255_77_000000000-ADUT3_1_1110_17680_5998 T---AC---GA-AG-GGG-----GCT-A-G-----C-G--T--T--GT-T-CGG-AA-----TC-A--C-T--GG-GC-----GT-A----AA-GC-GC-AC-----G-TA-G-G-C-G-----G--A-CA-T-T-T-----AA-<br>---G-T-C-A-----G-G-G--G--TG--A-AA-GC--C-T-GG-A-G-----CT-C-AA-----C-T-C-C-A-G-A-A-C---T-G--C-C--C-T-----T--GA-T-A--C-----T--G-G--GT--G-T-C---T-C-G-A-G-T--C---C-GG-----AA-G-A-----G-G-T-A---AG-T-----GG--A--ACT---G-C-G-A-<br>GT--GT-A-G-AG-GT--G---A-A-A---TT-C-GT-AG--AT-A-TT--C-G--C-A-A-G-A-AC-A-CC---AG--T--G--GC-GAA-G--G-C-G-----G--C-T-T-A---CTG--G--TC-C-G-----G-T---A-C-T--GA--CG-C-T-G--A-GG--T-G-CG-A-AA-G-C---G-TG--GG-G--AG-C-<br>A-AA-----CA--GG Bacteria(100);Proteobacteria(100);Alphaproteobacteria(100);Rhizobiales(100);Hyphomicrobiaceae(100);Angulomicrobium(100);unclassified(100);unclassified(100);unclassified(100); |   |   |    |   |   |   |   |   |   |    |   |   |   |   |   |   |    |   |   |   |   |   |   |    |   |   |   |   |
| Otu1008                                                                                                                                                                                                                                                                                                                                                                                                                                                                                                                                                                                                                                                                                                                                                                                                                                        | 0 | 0 | 0  | 0 | 0 | 0 | 0 | 0 | 0 | 0  | 0 | 0 | 0 | 0 | 0 | 0 | 0  | 0 | 0 | 0 | 0 | 0 | 0 | 0  | 6 | 0 | 0 | 0 |
|                                                                                                                                                                                                                                                                                                                                                                                                                                                                                                                                                                                                                                                                                                                                                                                                                                                | 0 | 0 | 0  | 0 | 0 | 0 | 0 | 0 | 0 | 0  | 0 | 0 | 0 | 0 | 0 | 0 | 0  | 0 | 0 | 0 | 0 | 0 | 0 | 0  | 0 | 0 | 0 | 0 |
|                                                                                                                                                                                                                                                                                                                                                                                                                                                                                                                                                                                                                                                                                                                                                                                                                                                | 0 | 0 | 0  | 0 | 0 | 0 | 0 | 0 | 0 | 0  | 0 | 0 | 0 | 0 | 0 | 0 | 0  | 0 | 0 | 0 | 0 | 0 | 0 | 0  | 0 | 0 | 0 | 0 |
|                                                                                                                                                                                                                                                                                                                                                                                                                                                                                                                                                                                                                                                                                                                                                                                                                                                | 0 | 0 | 0  | 0 | 0 | 0 | 0 | 0 | 0 | 0  | 0 | 0 | 0 | 0 | 0 | 0 | 15 | 0 | 0 | 0 | 0 | 0 | 0 | 0  | 0 | 0 |   |   |
| M02255_77_000000000-ADUT3_1_1111_20978_16249 T---AC---GT-AG-GTG-----GCA-A-G-----C-G--T--T--GT-C-CGG-AA-----TT-A--C-T--GG-GT-----GT-A----AA-GG-GT-GC-----G-CA-G-G-C-G-----G--G-AT-G-G-C---<br>-----AA---G-T-T-G-----G-A-T--G--TG--A-AA-AC--T-C-CG-G-G-----CT-C-AA-----C-C-C-G-G-A-G--C-C---T-G--C-A--T-T-----C--AA-A-A--C-----T--G-C--TG--T-T-C---T-T-G-A-G-T--G---A-AG-----TA-G-A-----G-G-C-A---GG-C-----GG--A--ATT---<br>C-C-C-G-GT--GT-A-G-CG-GT--G---A-A-A---TG-C-GT-AGA-T--A-TC--G-G--G-A-G-G-A-AC-A-CC---AG--T--G--GC-GAA-G--G-C-G-----G--C-C-T-G---CTG--G--GC-T-T-----T-T---A-C-T--GA--CG-C-T-G--A-GG--C-A-CG-A-AA-G-C---A-TG--GG-<br>T--AG-C-A-AA-----CA--GG Bacteria(100);Firmicutes(100);Clostridia(100);Clostridiales(100);Ruminococcaceae(100);Ethanoligenens(100);unclassified(100);unclassified(100);unclassified(100);           |   |   |    |   |   |   |   |   |   |    |   |   |   |   |   |   |    |   |   |   |   |   |   |    |   |   |   |   |
| Otu1009                                                                                                                                                                                                                                                                                                                                                                                                                                                                                                                                                                                                                                                                                                                                                                                                                                        | 0 | 0 | 0  | 0 | 0 | 0 | 0 | 0 | 0 | 0  | 0 | 0 | 0 | 0 | 0 | 0 | 0  | 0 | 0 | 0 | 0 | 0 | 0 | 0  | 0 | 6 | 0 | 0 |
|                                                                                                                                                                                                                                                                                                                                                                                                                                                                                                                                                                                                                                                                                                                                                                                                                                                | 0 | 0 | 0  | 0 | 0 | 0 | 0 | 0 | 0 | 0  | 0 | 0 | 0 | 0 | 0 | 0 | 0  | 0 | 0 | 0 | 0 | 0 | 0 | 0  | 0 | 0 | 0 | 0 |
|                                                                                                                                                                                                                                                                                                                                                                                                                                                                                                                                                                                                                                                                                                                                                                                                                                                | 0 | 0 | 0  | 0 | 0 | 0 | 0 | 0 | 0 | 0  | 0 | 0 | 0 | 0 | 0 | 0 | 0  | 0 | 0 | 0 | 0 | 0 | 0 | 0  | 0 | 0 | 0 | 0 |
|                                                                                                                                                                                                                                                                                                                                                                                                                                                                                                                                                                                                                                                                                                                                                                                                                                                | 0 | 0 | 17 | 0 | 0 | 0 | 0 | 0 | 0 | 0  | 0 | 0 | 0 | 0 | 0 | 0 | 0  | 0 | 0 | 0 | 0 | 0 | 0 | 0  | 0 | 0 |   |   |
| M02255_76_000000000-ADUNE_1_2107_24759_9643 C---GT---GC-CA-GCA-----GCC-G-C-----G--G--T--A--AT-A-CGG-AG-----GG-T--G-C--AA-GC-----GT--T-----AC-CC-G--GA-----A-T--C-A-C-G-----G--G-AG-C-G-T-----AA--<br>--G-T-C-T-----G-G-T--T--TT--A-AA-GA--C-T-GA-G-G-----CT-C-AA-----C-C-T-C-A-G-G--A-G---T-G--G-A--C--T-----G--GA-T-A--C-----T--G-C--GA--T-C-C---T-T-G-A-C-C--T---C-TG-----GA-G-A-----G-G-C-A---AC-C-----GG--A--ATT---C-C-T-G-GT-<br>-GT-A-G-CG-GT--G---G--A-A---TG-C-GT-AG--AT-A-CC--A-G--G-A-G-G-A-AC-A-CC---AA--T--G--GC-GAA-G--G-C-A-----G--G-T-T-G---CTG--G--AC-A-G-----A-A---G-G-T--GA--CG-C-T-G--A-GG--C-G-CG-A-AA-G-T---G-TG--GG-G--AG-C-<br>A-AA-----CC--GG Bacteria(100);Deinococcus-Thermus(100);Deinococcales(100);Deinococcaceae(100);Deinococcus(100);unclassified(100);unclassified(100);unclassified(100);unclassified(100);  |   |   |    |   |   |   |   |   |   |    |   |   |   |   |   |   |    |   |   |   |   |   |   |    |   |   |   |   |



Otu1010 0 0 0 0 0 0 0 0 0 0 0 0 0 0 0 0 0 0 0 0 0 0 0 0 0 5 0 0  
0 0 0 0 0 0 0 0 0 0 0 0 0 0 0 0 0 0 0 0 0 0 0 0 0 0 0 0  
0 0 0 0 0 0 0 0 0 0 0 0 0 0 0 0 0 0 0 0 0 0 0 0 0 0 0 0  
0 0 0 0 0 0 0 0 0 0 0 0 0 0 0 0 0 0 0 0 0 0 0 0 0 0 0 0  
M02255\_77\_000000000-ADUT3\_1\_2106\_20511\_19618 T---AC--GT-AG-GTG-----GCG-A-G-----C-G-T--T--GT-C-CGG-AA-----TG-A--C-T--GG-GC-----GT--A-----AA-GG-GC-GT-----G-TA-G-G-T-G-----G--A-CT-G-A-T-----  
-----CA---G-T-C-G-----G-A-T--G--GG--A-AA-GC--C-C-CA-G-G-----CT-T-AA-----C-C-T-G-G-G-A--A-C---C-G--C-A--T--C-----C-GA-T-A--C-----G--G-T--CA--G-T-C---T-T-G-A-G-T--G---C-GG-----GA-G-A-----G-G-G-C---AG-T-----GG--A--ATT-----  
C-C-C-A-GT--GT-A-G-CG-GT--G---A--A---TG-C-GT-AG--AG-A-TT--G-G--G-A-G-G-A-AC-A-CC---AG--T--G--GC-GAA-G--G-C-G-----G--C-T-G-C---CTG--G--AC-C-G-----T-A---A-C-T--GA--CA-C-T-G--A-GG--C-G-CG-A--AA-G-C---G-TG--  
GG-G--AG-C-A-AA-----CA--GG Bacteria(100);unclassified(100);unclassified(100);unclassified(100);unclassified(100);unclassified(100);unclassified(100);unclassified(100);unclassified(100);

Otu1011 0 0 0 0 0 0 0 0 0 0 0 0 0 0 0 0 0 0 0 0 0 0 0 0 0 5 0 0  
0 0 0 0 0 0 0 0 0 0 0 0 0 0 0 0 0 0 0 0 0 0 0 0 0 0 0 0  
0 0 0 0 0 0 0 0 0 0 0 0 0 0 0 0 0 0 0 0 0 0 0 0 0 0 0 0  
0 0 0 0 0 0 0 0 0 0 0 0 0 0 0 0 0 0 0 0 0 0 0 0 0 0 0 0  
M02255\_77\_000000000-ADUT3\_1\_2112\_17512\_13554 T---AC--GA-AG-GGG-----GCT-A-G-----C-G-T--T--GC-T-CGG-AT-----TT-A--C-T--GG-GC-----GT--A-----AA-GG-GC-GC-----G-TA-G-G-C-G-----G--A-TG-A-C-C-----  
-----AA---G-T-T-G-----G-G-G--G--TG--A-AA-TC--C-C-GG-G-G-----CT-C-AA-----C-C-T-C-G-G-A--A-C---T-G--C-C---T--C-----C-AA-A-A--C-----T-G-G--TG--A-T-C---T-T-G-A-G-T--A--T-GA---GA-G-A-----G-G-T-G--TG-T-----GG--A--ACT-----  
C-C-G-A-GT--GT-A-G-AG-GT--G---A--A---TT-C-GT-AG--AT-A-TT--C-G--G-A-A-G-A-AC-A-CC---AG--T--G--GC-GAAG--G-C-G-----A--C-A-C-A--CTG--G--CT-C-A-----T-T--A-C-T--GA--CG-C-T-G--A-GG--C-G-CG-A--AA-G-C---G-TG--GG--  
G--AG-C-A-AA-----CA--GG Bacteria(100);Proteobacteria(100);Alphaproteobacteria(100);unclassified(100);unclassified(100);unclassified(100);unclassified(100);unclassified(100);unclassified(100);

Otu1012 0 0 0 0 0 0 0 0 0 0 0 0 0 0 0 0 0 0 0 0 0 0 0 0 0 2 0 0  
0 0 0 0 0 0 0 0 0 0 0 0 0 0 0 0 0 0 1 0 0 0 0 0 0 0 0 0  
0 0 0 0 0 0 0 0 2 0 0 0 0 0 0 0 0 0 0 0 0 0 0 0 0 0 0 0  
0 0 0 0 0 0 0 0 0 0 0 0 0 0 0 0 0 0 0 0 0 0 0 0 0 0 0 0  
M02255\_77\_000000000-ADUT3\_1\_2115\_17938\_15504 A---AG--CA-CC-GGC-----TAA-C-T-----C--C-G--T--GC-C-AGC-A-----GC-C--G-C--GG-TA-----AT--A-----CG-GA-GG-GT-----G-CA-A-G-C-G-----T-TAATCGG-A-T-----  
-----TA---C-T-T-A-----G-A-T--G--TG--A-AA-GC--C-C-CG-G-G-----CT-C-AA-----C-C-T-G-G-G-A--A-T---T-G--C-A--T--T-----T-AA-A-A--C-----T-G-T--CC--A-G-C---T-A-G-A-G-T--C---T-TG---TA-G-A-----G-G-G-G---GG-T-----AG--A--ATT-----C-C-A-  
C-C-A-G-GT--GT-A-G-CG-GT--G---A--A---TG-C-GT-AG--AG-A-TC--T-G--G-A-G-G-A-AT-A-CC---GG--T--G--GC-GAA-G--G-C-G-----G--C-C-C-C---CTG--G--AC-A-A-----A-G---A-C-T--GA--CG-C-T-C--A-GG--T-G-CG-A--AA-G-C---G-TG--  
GG-G--AG-C-A-AA-----CA--GG Bacteria(100);Proteobacteria(100);Gammaproteobacteria(100);unclassified(100);unclassified(100);unclassified(100);unclassified(100);unclassified(100);unclassified(100);

Otu1013 0 0 0 0 0 0 0 0 0 0 0 0 0 0 0 0 0 0 0 0 0 0 0 0 0 2 0 10  
0 0 0 0 0 0 0 0 0 0 0 0 0 0 0 0 0 0 0 0 0 0 0 0 0 0 0 0  
0 0 0 0 0 0 0 0 0 0 0 0 0 0 0 0 0 0 0 0 0 0 0 0 0 0 0 0  
0 0 0 0 0 0 0 0 0 0 0 0 0 0 0 0 0 0 0 0 0 0 0 0 0 0 0 0  
M02255\_76\_000000000-ADUNE\_1\_2115\_4070\_18462 G---AA---GC-AC-CGG-----CTA-A-C-----T--T--C---G--TG-C-CAG-CA-----GC-C--G-C--GG-TA-----AT--A-----CG-AG-GG-GT-----G-CA-A-G-C-G-----G--TTAATC-G-G-----  
AA---G-T-T-G-----G-A-T--G--TG--A-AA-GC--C-C-CG-G-G-----CT-C-AA-----C-C-T-G-G-G-A--A-T---T-G--C-A--T--T-----C-AA-A-A--C-----T-G-G--TT--G-A-C---T-A-G-A-G-T--A---T-GT---GA-G-A-----G-G-G-G---GG-T-----AG--A--ATT-----C-C-A-  
A-GT--GT-A-G-CG-GT--G---A--A---TG-C-GT-AG--AG-A-TT--T-G--G-A-G-G-A-AT-A-CC---AG--T--G--GC-GAA-G--G-C-G-----G--C-C-C-C---CTG--G--CA-C-A-----A-T---A-C-T--GA--CG-C-T-G--A-GG--T-A-CG-A--AA-G-C---G-TG--GG-G--  
AG-C-A-AA-----CA--GG Bacteria(100);Proteobacteria(100);Gammaproteobacteria(100);Chromatiales(100);Chromatiaceae(100);unclassified(100);unclassified(100);unclassified(100);unclassified(100);

Otu1014 0 0 0 0 0 0 0 0 0 0 0 0 0 0 0 0 0 0 0 0 0 0 0 0 0 0 0 0  
0 0 0 0 0 0 0 0 0 0 28 0 0 0 0 0 0 0 0 0 0 0 0 0 0 0 0  
0 0 0 0 0 0 0 0 0 0 0 0 0 0 0 0 0 0 0 0 0 0 0 0 0 0 0 0  
0 0 0 0 0 0 0 0 0 0 0 0 0 0 0 0 0 0 0 0 0 0 0 0 0 0 0 0  
M02255\_77\_000000000-ADUT3\_1\_1105\_17835\_21152 T---AC--GT-AG-GGG-----GCG-A-G-----C-G-T--T--GT-C-CGG-AA-----TT-A--C-T--GG-GC-----GT--A-----AA-GG-GT-AC-----G-TA-G-G-C-G-----G--C-TA-G-G-T-----  
-----AA---G-T-C-A-----G-G-T--G--TG--A-AA-TC--C-A-TG-G-G-----CT-C-AA-----C-C-C-A-T-G-T--A-----A-G--C-A--C--T-----T-GA-A-A--C-----T-G-C--TT--A-G-C---T-T-G-A-G-T--T--A-AG---GA-G-A-----G-G-A-A--AG-C-----GG--A--ATT-----C-  
C-T-G-GT--GT-A-G-CG-GT--G---A--A---TG-C-GT-AG--AT-A-TC--A-G--G-A-G-G-A-AC-A-CC---AG--T--G--GC-GAA-G--G-C-G-----G--C-T-T-T---CTG--G--CC-T-T-----G-G---A-C-T--GA--CG-C-T-G--A-GG--T-A-CG-A--AA-G-C---G-TG--GG-G--  
-AG-C-A-AA-----CA--GG Bacteria(100);Firmicutes(100);Clostridia(100);Clostridiales(100);unclassified(100);unclassified(100);unclassified(100);unclassified(100);unclassified(100);



|                                                                                                                                                                                                                                                                                                                                                                                                                                                                                                                                                                                                                                                                                                                                                                                                                                                               |   |   |   |   |   |   |   |   |   |   |    |   |   |    |   |    |   |   |   |   |    |    |   |   |   |   |   |   |
|---------------------------------------------------------------------------------------------------------------------------------------------------------------------------------------------------------------------------------------------------------------------------------------------------------------------------------------------------------------------------------------------------------------------------------------------------------------------------------------------------------------------------------------------------------------------------------------------------------------------------------------------------------------------------------------------------------------------------------------------------------------------------------------------------------------------------------------------------------------|---|---|---|---|---|---|---|---|---|---|----|---|---|----|---|----|---|---|---|---|----|----|---|---|---|---|---|---|
| Otu1015                                                                                                                                                                                                                                                                                                                                                                                                                                                                                                                                                                                                                                                                                                                                                                                                                                                       | 0 | 0 | 0 | 0 | 0 | 0 | 0 | 0 | 0 | 0 | 0  | 0 | 0 | 0  | 0 | 0  | 0 | 0 | 0 | 0 | 0  | 0  | 0 | 0 | 0 | 2 | 0 | 2 |
|                                                                                                                                                                                                                                                                                                                                                                                                                                                                                                                                                                                                                                                                                                                                                                                                                                                               | 0 | 0 | 0 | 0 | 0 | 0 | 0 | 0 | 0 | 0 | 0  | 0 | 0 | 0  | 0 | 0  | 0 | 0 | 0 | 0 | 0  | 0  | 0 | 0 | 0 | 0 | 0 | 0 |
|                                                                                                                                                                                                                                                                                                                                                                                                                                                                                                                                                                                                                                                                                                                                                                                                                                                               | 0 | 0 | 0 | 0 | 0 | 0 | 0 | 0 | 0 | 0 | 0  | 0 | 0 | 0  | 0 | 0  | 0 | 0 | 0 | 0 | 0  | 0  | 0 | 0 | 0 | 0 | 0 | 0 |
|                                                                                                                                                                                                                                                                                                                                                                                                                                                                                                                                                                                                                                                                                                                                                                                                                                                               | 0 | 0 | 0 | 0 | 0 | 0 | 0 | 0 | 0 | 0 | 0  | 0 | 0 | 0  | 0 | 0  | 0 | 0 | 0 | 0 | 0  | 0  | 0 | 0 | 0 | 0 |   |   |
| M02255_77_000000000-ADUT3_1_1115_5308_18657 T---AC--GA-AG-GGA-----GCT-A-G-----C--G--T---T--GT-T-CGG-AA-----TT-A--C-T--GG-GC-----GT--A----AA-GG-GC-GC-----G-TA-G-G-CGG-----C-TT-T-G-T-----AA-<br>---G-T-C-A-----G-A-T--G--TG--A-AA-TC--C-C-CG-G-G----CT-T-AA-----C-C-T-G-G-G-A--A-C---T-G--C-A---T-T-----T--GA-T-A--C-----T--G-C-AA--G-G-C---T-A-G-A-G-A-T---T-GA----GA-G-A-----G-G-T-A---AG-T-----GG--A--ATTA----T-G-A-<br>GT--GT-A-G-AG-GT--G---A--A-A---TT-C-GT-AG--AT-A-TT--C-A--T-A-A-G-A-AC-A-TC---AG--T--G--GC-GAA-G--G-C-G-----G--C-T-T-A---CTG--G--CT-C-A-----A-T---A-C-T--GA--CG-C-T-A--A-GG--C-G-CG-A--AA-G-C---G-TG--GG-G--AG-C-<br>A-AA-----CA--GG     Bacteria(100);Proteobacteria(100);unclassified(100);unclassified(100);unclassified(100);unclassified(100);unclassified(100);unclassified(100);unclassified(100);                           |   |   |   |   |   |   |   |   |   |   |    |   |   |    |   |    |   |   |   |   |    |    |   |   |   |   |   |   |
| Otu1016                                                                                                                                                                                                                                                                                                                                                                                                                                                                                                                                                                                                                                                                                                                                                                                                                                                       | 0 | 0 | 0 | 0 | 0 | 0 | 0 | 0 | 0 | 0 | 0  | 0 | 0 | 0  | 0 | 0  | 0 | 0 | 0 | 0 | 0  | 0  | 0 | 0 | 0 | 1 | 0 | 0 |
|                                                                                                                                                                                                                                                                                                                                                                                                                                                                                                                                                                                                                                                                                                                                                                                                                                                               | 0 | 0 | 0 | 0 | 0 | 0 | 0 | 0 | 0 | 0 | 0  | 0 | 0 | 38 | 0 | 0  | 0 | 0 | 0 | 0 | 0  | 0  | 0 | 0 | 0 | 0 | 0 | 0 |
|                                                                                                                                                                                                                                                                                                                                                                                                                                                                                                                                                                                                                                                                                                                                                                                                                                                               | 0 | 0 | 0 | 0 | 0 | 0 | 0 | 0 | 0 | 0 | 0  | 0 | 0 | 0  | 0 | 0  | 0 | 0 | 0 | 0 | 0  | 0  | 0 | 0 | 0 | 0 | 0 | 0 |
|                                                                                                                                                                                                                                                                                                                                                                                                                                                                                                                                                                                                                                                                                                                                                                                                                                                               | 0 | 0 | 0 | 0 | 0 | 0 | 0 | 0 | 0 | 0 | 0  | 0 | 0 | 0  | 0 | 76 | 0 | 0 | 0 | 0 | 0  | 0  | 0 | 0 | 0 | 0 |   |   |
| M02255_77_000000000-ADUT3_1_1115_10045_20545            T---AC--GA-AG-GGG-----GCT-A-G-----C--G--T---T--GT-T-CGG-AA-----TT-A--C-T--GG-GC-----GT--A----AA-GC-GC-AC-----G-TA-G-G-C-G-----G--A-TT-A-G-C-----<br>-----AA---G-T-C-A-----G-G-G--G--TG--A-AA-TC--C-C-GG-G-G----CT-C-AA-----C-C-T-C-G-G-A--A-C---T-G--C-C---T-T-----T--GA-T-A--C-----T--G-C-TA--G-T-C---T-A-G-A-G-T-C---C-GG----AA-G-A-----G-G-T-G---GG-T-----GG--A--ATT---C-<br>C-T-A-GT--GT-A-G-AG-GT--G---A--A-A---TT-C-GC-AG--AT-A-TT--A-G--G-A-A-G-A-AC-A-CC---AG--T--G--GC-GAA-G--G-C-G-----G--C-C-C-A---CTG--G--TC-C-G-----G-A---A-C-T--GA--CG-C-T-G--A-GG--T-G-CG-A--AA-G-C---G-TG--GG-<br>G--AG-C-A-AA-----CA--GG     Bacteria(100);Proteobacteria(100);Alphaproteobacteria(100);Rhizobiales(100);unclassified(100);unclassified(100);unclassified(100);unclassified(100);unclassified(100);  |   |   |   |   |   |   |   |   |   |   |    |   |   |    |   |    |   |   |   |   |    |    |   |   |   |   |   |   |
| Otu1017                                                                                                                                                                                                                                                                                                                                                                                                                                                                                                                                                                                                                                                                                                                                                                                                                                                       | 0 | 0 | 0 | 0 | 0 | 0 | 0 | 0 | 0 | 0 | 0  | 0 | 0 | 0  | 0 | 0  | 0 | 0 | 0 | 0 | 0  | 0  | 0 | 0 | 0 | 0 | 0 | 0 |
|                                                                                                                                                                                                                                                                                                                                                                                                                                                                                                                                                                                                                                                                                                                                                                                                                                                               | 0 | 0 | 0 | 0 | 0 | 0 | 0 | 0 | 0 | 0 | 31 | 1 | 0 | 0  | 0 | 0  | 0 | 0 | 0 | 0 | 0  | 0  | 0 | 0 | 0 | 0 | 0 | 0 |
|                                                                                                                                                                                                                                                                                                                                                                                                                                                                                                                                                                                                                                                                                                                                                                                                                                                               | 0 | 0 | 0 | 0 | 0 | 0 | 0 | 0 | 0 | 0 | 0  | 0 | 0 | 0  | 0 | 0  | 0 | 0 | 0 | 0 | 0  | 0  | 0 | 0 | 0 | 0 | 0 | 0 |
|                                                                                                                                                                                                                                                                                                                                                                                                                                                                                                                                                                                                                                                                                                                                                                                                                                                               | 0 | 0 | 0 | 0 | 0 | 0 | 0 | 0 | 0 | 0 | 0  | 0 | 0 | 0  | 0 | 0  | 0 | 0 | 0 | 0 | 0  | 0  | 0 | 0 | 0 | 0 |   |   |
| M02255_77_000000000-ADUT3_1_1104_3043_17971 T---AC--GT-AG-GTG-----GCA-A-G-----C--G--T---T--GT-C-CGG-AT-----TT-A--C-T--GG-GC-----GT--A----AA-GG-GC-GT-----G-CA-G-G-C-G-----G--T-TT-G-C-T-----AA-<br>---G-T-C-T-----A-G-G--G--TG--A-AA-GC--T-C-CC-G-G----CT-C-AA-----C-T-G-G-G-A-G--A-G---G-T--C-C---T-T-----G--GA-T-A--C-----T--G-G--CG--A-A-C---T-T-G-A-G-G--G---A-TG----CA-G-A-----G-G-A-A---AG-T-----GG--A--ATT---C-C-C-G-<br>GT--GT-A-G-TG-GT--G---A--T-A---TG-C-GT-AG--AT-A-TC--G-G--G-A-G-G-A-AC-A-CC---AG--T--G--GC-GAA-G--G-C-G-----G--C-T-T-T---CTG--G--GC-A-T-----T-T---C-C-T--GA--CG-C-T-G--A-GA--C-G-CG-A--AA-G-C---G-TG--GG-G--AG-C-<br>G-AA-----CC--GG     Bacteria(100);Chloroflexi(100);unclassified(100);unclassified(100);unclassified(100);unclassified(100);unclassified(100);unclassified(100);unclassified(100);                         |   |   |   |   |   |   |   |   |   |   |    |   |   |    |   |    |   |   |   |   |    |    |   |   |   |   |   |   |
| Otu1018                                                                                                                                                                                                                                                                                                                                                                                                                                                                                                                                                                                                                                                                                                                                                                                                                                                       | 0 | 0 | 0 | 0 | 0 | 0 | 0 | 0 | 0 | 0 | 0  | 0 | 0 | 0  | 0 | 0  | 0 | 0 | 0 | 0 | 0  | 0  | 0 | 0 | 0 | 7 | 0 | 0 |
|                                                                                                                                                                                                                                                                                                                                                                                                                                                                                                                                                                                                                                                                                                                                                                                                                                                               | 0 | 0 | 0 | 0 | 0 | 0 | 0 | 0 | 0 | 0 | 0  | 0 | 0 | 0  | 0 | 0  | 0 | 0 | 0 | 0 | 0  | 0  | 0 | 0 | 0 | 0 | 0 | 0 |
|                                                                                                                                                                                                                                                                                                                                                                                                                                                                                                                                                                                                                                                                                                                                                                                                                                                               | 0 | 0 | 0 | 0 | 0 | 0 | 0 | 0 | 0 | 0 | 0  | 0 | 0 | 0  | 0 | 0  | 0 | 0 | 0 | 0 | 0  | 0  | 0 | 0 | 0 | 0 | 0 | 0 |
|                                                                                                                                                                                                                                                                                                                                                                                                                                                                                                                                                                                                                                                                                                                                                                                                                                                               | 0 | 0 | 0 | 0 | 0 | 0 | 0 | 0 | 0 | 0 | 0  | 0 | 0 | 0  | 0 | 0  | 0 | 0 | 0 | 0 | 0  | 0  | 0 | 0 | 0 | 0 |   |   |
| M02255_77_000000000-ADUT3_1_1117_8620_17358 T---AC--GG-AG-GGG-----GCT-A-G-----C--G--T---T--GT-T-CGG-AA-----TT-A--C-T--GG-GC-----GT--A----AA-GC-GC-AC-----G-TA-G-G-C-G-----G--C-TT-T-A-C-----AA-<br>---G-T-C-A-----G-A-G--G--TG--A-AA-GC--C-C-GG-A-G----CT-C-AA-----C-T-C-C-G-G-A--A-T---T-G--C-C---T-T-----T--GA-G-A--C-----T--G-T--AT--C-G-C---T-T-G-A-A-T--C---A-TG----GA-G-A-----G-G-C-G---GG-T-----GG--A--ATT---C-C-G-A-<br>GT--GT-A-G-AG-GT--G---A--A-A---TT-C-GT-AG--AT-A-TT--C-G--G-A-A-G-A-AC-A-CC---AG--T--G--GC-GAA-G--G-C-G-----G--C-C-C-G---CTG--G--AC-A-T-----G-T---A-T-T--GA--CG-C-T-G--A-GG--T-G-CG-A--AA-G-C---G-TG--GG-G--AG-<br>C-A-AA-----CA--GG     Bacteria(100);Proteobacteria(100);Alphaproteobacteria(100);Sphingomonadales(100);Sphingomonadaceae(100);unclassified(100);unclassified(100);unclassified(100);unclassified(100);      |   |   |   |   |   |   |   |   |   |   |    |   |   |    |   |    |   |   |   |   |    |    |   |   |   |   |   |   |
| Otu1019                                                                                                                                                                                                                                                                                                                                                                                                                                                                                                                                                                                                                                                                                                                                                                                                                                                       | 0 | 0 | 0 | 0 | 0 | 0 | 0 | 0 | 0 | 0 | 0  | 0 | 0 | 0  | 0 | 0  | 0 | 0 | 0 | 0 | 0  | 0  | 0 | 0 | 0 | 0 | 0 | 0 |
|                                                                                                                                                                                                                                                                                                                                                                                                                                                                                                                                                                                                                                                                                                                                                                                                                                                               | 0 | 0 | 0 | 0 | 0 | 0 | 0 | 0 | 0 | 0 | 8  | 0 | 0 | 0  | 0 | 0  | 0 | 0 | 0 | 0 | 0  | 0  | 0 | 0 | 0 | 0 | 1 | 0 |
|                                                                                                                                                                                                                                                                                                                                                                                                                                                                                                                                                                                                                                                                                                                                                                                                                                                               | 0 | 0 | 0 | 0 | 0 | 0 | 0 | 0 | 0 | 0 | 0  | 0 | 0 | 0  | 0 | 0  | 0 | 0 | 0 | 0 | 0  | 0  | 0 | 0 | 0 | 0 | 0 | 0 |
|                                                                                                                                                                                                                                                                                                                                                                                                                                                                                                                                                                                                                                                                                                                                                                                                                                                               | 0 | 0 | 0 | 0 | 0 | 0 | 0 | 0 | 0 | 0 | 0  | 0 | 0 | 0  | 0 | 0  | 0 | 0 | 0 | 0 | 17 | 34 | 0 | 0 | 0 | 0 |   |   |
| M02255_77_000000000-ADUT3_1_1102_2995_14389 G---AC--GT-AG-GGC-----GCG-A-G-----C--G--T---T--GT-C-CGG-AT-----TT-A--T-T--GG-GC-----GT--A----AA-GA-GC-TC-----G-TA-G-G-C-G-----G--C-TT-G-T-C-----GC-<br>---G-T-C-G-----A-A-T--G--TG--A-AA-TC--T-C-AG-G-G----CT-C-AA-----C-T-C-T-G-A-C--A-T---T-G--C-A---T-T-----C--GA-T-A--C-----G--G-G--CA--G-G-C---T-A-G-A-G-T--T---C-GG----TA-G-G-----G-G-A-G---AC-T-----GG--A--ATT---C-C-T-G-<br>GT--GT-A-G-CG-GT--G---A--A-A---TG-C-GC-AG--AT-A-TC--A-G--G-A-G-G-A-AC-A-CC---GG--T--G--GC-GAA-G--G-C-G-----G--G-T-C-T---CTG--G--GC-C-G-----A-T---A-C-T--GA--CG-C-T-G--A-GG--A-G-CG-A--AA-G-C---G-TG--GG-G--AG-<br>C-G-AA-----CA--GG     Bacteria(100);Actinobacteria(100);Actinobacteria(100);Actinobacteridae(100);Actinomycetales(100);Micromonosporineae(100);Micromonosporaceae(100);Actinoplanes(100);unclassified(100); |   |   |   |   |   |   |   |   |   |   |    |   |   |    |   |    |   |   |   |   |    |    |   |   |   |   |   |   |



|                                                                                                                                                                                                                      |    |   |   |   |    |   |   |   |   |     |    |    |    |   |   |   |   |    |   |   |   |   |    |   |   |    |   |
|----------------------------------------------------------------------------------------------------------------------------------------------------------------------------------------------------------------------|----|---|---|---|----|---|---|---|---|-----|----|----|----|---|---|---|---|----|---|---|---|---|----|---|---|----|---|
| Otu1020                                                                                                                                                                                                              | 0  | 0 | 0 | 0 | 0  | 0 | 0 | 0 | 0 | 0   | 0  | 0  | 0  | 0 | 0 | 0 | 0 | 0  | 0 | 0 | 0 | 0 | 0  | 0 | 0 | 0  |   |
|                                                                                                                                                                                                                      | 0  | 0 | 0 | 0 | 0  | 0 | 0 | 0 | 0 | 0   | 50 | 0  | 0  | 0 | 0 | 0 | 0 | 0  | 0 | 0 | 0 | 0 | 0  | 0 | 0 | 0  |   |
|                                                                                                                                                                                                                      | 0  | 0 | 0 | 0 | 0  | 0 | 0 | 0 | 0 | 0   | 0  | 0  | 0  | 0 | 0 | 0 | 0 | 0  | 0 | 0 | 0 | 0 | 0  | 0 | 0 | 0  |   |
|                                                                                                                                                                                                                      | 0  | 0 | 0 | 0 | 0  | 0 | 0 | 0 | 0 | 0   | 0  | 0  | 0  | 0 | 0 | 0 | 0 | 0  | 0 | 0 | 0 | 0 | 0  | 0 | 0 | 0  |   |
| M02255_77_000000000-ADUT3_1_1103_6886_12447 T---AC--GT-AG-GGG-----GCG-A-G----C-G-T--T--GT-C-CGG-AA-----TT-A-C-T--GG-GC-----GT-A----AA-GG-GT-GC-----G-TA-G-G-C-G-----G-C-TT-A-G-T-----                                |    |   |   |   |    |   |   |   |   |     |    |    |    |   |   |   |   |    |   |   |   |   |    |   |   |    |   |
| AA---G-T-C-A-----G-G-T--G--TG--A-AA-GG--C-A-TG-G-G----CT-C-AA-----C--C-C-A-T-G--T-A---A-G--C-A--C-T-----T-GA-A-A--C-----T-G-C--TT-A-G-C---T-T-G-A-G-T--T--A-AG----GA-G-A-----G-G-G-A--AG-C-----GG--A--ATT---C-C-T-   |    |   |   |   |    |   |   |   |   |     |    |    |    |   |   |   |   |    |   |   |   |   |    |   |   |    |   |
| G-GT--GT-A-G-CG-GT--G---A-A-A---TG-C-GT-AG--AT-A-TC--A-G--G-A-G-G-A-AC-A-CC--AG--T--G--GC-GAA-G--G-C-G-----G--C-T-T-C--CTG--G--CC-T-T-----G-G--A-C-T-GA--CG-C-T-G--A-GG--C-A-CG-A--AA-G-C--G-TG--GG-G--              |    |   |   |   |    |   |   |   |   |     |    |    |    |   |   |   |   |    |   |   |   |   |    |   |   |    |   |
| AG-C-A-AA-----CA--GG Bacteria(100);Firmicutes(100);Clostridia(100);Clostridiales(100);unclassified(100);unclassified(100);unclassified(100);unclassified(100);unclassified(100);                                     |    |   |   |   |    |   |   |   |   |     |    |    |    |   |   |   |   |    |   |   |   |   |    |   |   |    |   |
| Otu1021                                                                                                                                                                                                              | 0  | 0 | 0 | 0 | 0  | 0 | 0 | 0 | 0 | 0   | 0  | 0  | 0  | 0 | 0 | 0 | 0 | 0  | 0 | 0 | 0 | 0 | 27 | 0 | 0 | 0  | 0 |
|                                                                                                                                                                                                                      | 0  | 0 | 0 | 0 | 0  | 0 | 0 | 0 | 0 | 0   | 0  | 0  | 0  | 0 | 0 | 0 | 0 | 0  | 0 | 0 | 0 | 0 | 0  | 0 | 0 | 0  |   |
|                                                                                                                                                                                                                      | 0  | 0 | 0 | 0 | 0  | 0 | 0 | 0 | 0 | 0   | 0  | 0  | 0  | 0 | 0 | 0 | 0 | 0  | 0 | 0 | 0 | 0 | 0  | 0 | 0 | 0  |   |
|                                                                                                                                                                                                                      | 0  | 0 | 0 | 0 | 0  | 0 | 0 | 0 | 0 | 0   | 0  | 0  | 0  | 0 | 0 | 0 | 0 | 0  | 0 | 0 | 0 | 0 | 0  | 0 | 0 | 0  |   |
| M02255_77_000000000-ADUT3_1_1106_5860_16419 T---AC--GG-AG-GGG-----GCT-A-G----C-G-T--T--GT-T-CGG-AA-----TT-A-C-T--GG-GC-----GT-A----AA-GC-GC-GC-----G-TA-G-G-C-G-----G-C-CA-T-T-T-----AA-                             |    |   |   |   |    |   |   |   |   |     |    |    |    |   |   |   |   |    |   |   |   |   |    |   |   |    |   |
| ---G-T-C-A-----G-A-G--G--TG--A-AA-GC--C-C-GG-T-G----CT-C-AA-----C-A-T-C-G-G-A--A-T---A-G--C-C--T-T-----T-GA-G-A--C-----T-G-G--GT--G-G-C---T-A-G-A-A-T-C--C-AG----GA-G-A-----G-G-T-G--AG-T-----GG--A--ATT---C-C-G-A-  |    |   |   |   |    |   |   |   |   |     |    |    |    |   |   |   |   |    |   |   |   |   |    |   |   |    |   |
| GT--GT-A-G-AG-GT--G---A--A-A---TT-C-GT-AG--AT-A-TT--C-G--G-A-A-G-A-AC-A-CC--AG--T--G--GC-GAA-G--G-C-G-----G--C-T-C-A--CTG--G--AC-T-G-----G-T--A-T-T-GA--CG-C-T-G--A-GG--T-G-CG-A--AA-G-C--G-TG--GG-G--AG-            |    |   |   |   |    |   |   |   |   |     |    |    |    |   |   |   |   |    |   |   |   |   |    |   |   |    |   |
| C-A-AA-----CA--GG Bacteria(100);Proteobacteria(100);Alphaproteobacteria(100);unclassified(100);unclassified(100);unclassified(100);unclassified(100);unclassified(100);unclassified(100);                            |    |   |   |   |    |   |   |   |   |     |    |    |    |   |   |   |   |    |   |   |   |   |    |   |   |    |   |
| Otu1022                                                                                                                                                                                                              | 0  | 0 | 0 | 0 | 0  | 0 | 0 | 0 | 0 | 0   | 0  | 0  | 0  | 0 | 0 | 0 | 0 | 0  | 0 | 0 | 0 | 0 | 18 | 0 | 0 | 0  | 0 |
|                                                                                                                                                                                                                      | 0  | 0 | 0 | 0 | 0  | 0 | 0 | 0 | 0 | 0   | 0  | 0  | 0  | 0 | 0 | 0 | 0 | 0  | 0 | 0 | 0 | 0 | 0  | 0 | 0 | 0  |   |
|                                                                                                                                                                                                                      | 0  | 0 | 0 | 0 | 0  | 0 | 0 | 0 | 0 | 0   | 0  | 0  | 0  | 0 | 0 | 0 | 0 | 0  | 0 | 0 | 0 | 0 | 0  | 0 | 0 | 0  |   |
|                                                                                                                                                                                                                      | 0  | 0 | 0 | 0 | 0  | 0 | 0 | 0 | 0 | 0   | 0  | 0  | 0  | 0 | 0 | 0 | 0 | 0  | 0 | 0 | 0 | 0 | 0  | 0 | 0 | 0  |   |
| M02255_77_000000000-ADUT3_1_1112_19263_11399 T---AC--GT-AG-GGG-----CCA-A-G----C-G-T--T--GT-C-CGG-AG-----TT-A-C-T--GG-GC-----GT-A----AA-GC-GT-GC-----G-CA-G-G-C-G-----G-C-TC-G-T-T-----                               |    |   |   |   |    |   |   |   |   |     |    |    |    |   |   |   |   |    |   |   |   |   |    |   |   |    |   |
| -----GC---G-C-C-C-----G-A-C--G--TG--A-AA-GC--C-C-CC-G-G----CT-C-AA-----C-C-G-G-G-G-A--G-G---G-T--C-G--T-C-----G--GG-G-A--C-----G--G-G--CG--A-G-C---T-T-G-A-G-G--G--T-AT---CA-G-G-----G-G-C-T--GG-T-----GG--A--ACT--- |    |   |   |   |    |   |   |   |   |     |    |    |    |   |   |   |   |    |   |   |   |   |    |   |   |    |   |
| -C-C-C-G-GT--GT-A-G-TG-GT--G---A--A-A---TG-C-GT-AG--AG-A-TC--G-G--G-A-A-G-A-AC-A-CC--CG--T--G--GC-GAA-G--G-C-G-----G--C-C-A-G---CTG--G--GA-T-A-----C-A---C-C-T-GA--CG-C-T-G--A-GG--C-A-CG-A--AG-G-C--G-TG--          |    |   |   |   |    |   |   |   |   |     |    |    |    |   |   |   |   |    |   |   |   |   |    |   |   |    |   |
| GG-G--AG-C-G-AA-----CG--GG Bacteria(100);Chloroflexi(100);Thermomicrobia(100);JG30-KF-CM45(100);unclassified(100);unclassified(100);unclassified(100);unclassified(100);unclassified(100);                           |    |   |   |   |    |   |   |   |   |     |    |    |    |   |   |   |   |    |   |   |   |   |    |   |   |    |   |
| Otu1023                                                                                                                                                                                                              | 0  | 0 | 0 | 0 | 0  | 0 | 0 | 0 | 0 | 0   | 0  | 0  | 0  | 0 | 0 | 0 | 0 | 0  | 0 | 0 | 0 | 0 | 6  | 0 | 0 | 0  | 0 |
|                                                                                                                                                                                                                      | 0  | 0 | 0 | 0 | 0  | 0 | 0 | 0 | 0 | 0   | 0  | 0  | 0  | 0 | 0 | 0 | 0 | 0  | 0 | 0 | 0 | 0 | 0  | 0 | 0 | 0  |   |
|                                                                                                                                                                                                                      | 0  | 0 | 0 | 0 | 0  | 0 | 0 | 0 | 0 | 0   | 5  | 0  | 0  | 0 | 0 | 0 | 0 | 22 | 0 | 0 | 0 | 0 | 0  | 0 | 0 | 23 |   |
|                                                                                                                                                                                                                      | 32 | 0 | 0 | 0 | 86 | 0 | 7 | 7 | 0 | 155 | 0  | 91 | 12 | 0 | 3 | 0 | 0 | 0  | 0 | 0 | 0 | 0 | 0  | 0 | 0 | 0  |   |
| M02255_77_000000000-ADUT3_1_1115_15344_15735 T---AC--GT-AG-GGG-----GCG-A-G----C-G-T--T                                                                                                                               |    |   |   |   |    |   |   |   |   |     |    |    |    |   |   |   |   |    |   |   |   |   |    |   |   |    |   |



[illegible]



|                                                                                                                                                                                                                         |   |   |   |   |   |   |   |   |   |    |    |   |   |   |   |   |   |   |   |   |   |   |   |   |   |   |   |   |
|-------------------------------------------------------------------------------------------------------------------------------------------------------------------------------------------------------------------------|---|---|---|---|---|---|---|---|---|----|----|---|---|---|---|---|---|---|---|---|---|---|---|---|---|---|---|---|
| Otu1030                                                                                                                                                                                                                 | 0 | 0 | 0 | 0 | 0 | 0 | 0 | 0 | 0 | 0  | 0  | 0 | 0 | 0 | 0 | 0 | 0 | 0 | 0 | 0 | 0 | 0 | 0 | 1 | 0 | 0 | 3 | 0 |
|                                                                                                                                                                                                                         | 0 | 0 | 0 | 0 | 0 | 0 | 0 | 0 | 0 | 0  | 0  | 0 | 0 | 0 | 0 | 0 | 0 | 0 | 0 | 0 | 0 | 0 | 0 | 0 | 0 | 0 | 0 | 0 |
|                                                                                                                                                                                                                         | 0 | 0 | 0 | 0 | 0 | 0 | 0 | 0 | 0 | 0  | 0  | 0 | 0 | 0 | 0 | 0 | 0 | 0 | 0 | 0 | 0 | 0 | 0 | 0 | 0 | 0 | 0 | 0 |
|                                                                                                                                                                                                                         | 0 | 0 | 0 | 0 | 0 | 0 | 0 | 0 | 0 | 0  | 0  | 0 | 0 | 0 | 0 | 0 | 0 | 0 | 0 | 0 | 0 | 0 | 0 | 0 | 0 | 0 |   |   |
| M02255_76_000000000-ADUNE_1_2110_28238_7836 C---GG---CT-AA-CTC-----CGT-G-C-----C-A-G---C-AG-C-CGC-GG-----TA-A-T-A-CG-GA-----GG--G---TC-CA-AG-CG-----T-TA-T-C-C-G-----G--C-CT-T-A-T-----AA--                             |   |   |   |   |   |   |   |   |   |    |    |   |   |   |   |   |   |   |   |   |   |   |   |   |   |   |   |   |
| --G-T-C-A-----G-T-G--G-TG--A-AA-TC--T-C-CT-A-G----CT-C-AA-----C-T-A-G-G-A-A-A-C---T-G--C-C---A-T-----T-GA-T-A---C-----T--G-T-AG--G-G-C---T-T-G-A-A-T-T---T-TT----GT-G-A-----A-G-T-A---AC-T-----AG--A-ATA---T-G-T-A-GT-- |   |   |   |   |   |   |   |   |   |    |    |   |   |   |   |   |   |   |   |   |   |   |   |   |   |   |   |   |
| GT-A-G-CG-GT--G---A-A-A---TG-C-TT-AG--AT-A-TT--A-C--A-T-G-G-A-AT-A-CC---AA-T-T--GC-GAA-G--G-C-A-----G--G-T-T-A---CTA--A--CA-A-A-----C-G---A-T-T-GA--CG-C-T-G--A-TG--G-A-CG-A-AA-G-C---G-TG--GG-G--AG-C-G-               |   |   |   |   |   |   |   |   |   |    |    |   |   |   |   |   |   |   |   |   |   |   |   |   |   |   |   |   |
| AA-----CA--GG      Bacteria(100);Bacteroidetes(100);Flavobacteria(100);Flavobacteriales(100);Flavobacteriaceae(100);unclassified(100);unclassified(100);unclassified(100);unclassified(100);                            |   |   |   |   |   |   |   |   |   |    |    |   |   |   |   |   |   |   |   |   |   |   |   |   |   |   |   |   |
| Otu1031                                                                                                                                                                                                                 | 0 | 0 | 0 | 0 | 0 | 0 | 0 | 0 | 0 | 0  | 0  | 0 | 0 | 0 | 0 | 0 | 0 | 0 | 0 | 0 | 0 | 0 | 0 | 0 | 0 | 0 | 0 | 0 |
|                                                                                                                                                                                                                         | 0 | 0 | 0 | 0 | 0 | 0 | 0 | 0 | 0 | 0  | 30 | 0 | 0 | 0 | 0 | 0 | 0 | 0 | 0 | 0 | 0 | 0 | 0 | 0 | 0 | 0 | 0 | 0 |
|                                                                                                                                                                                                                         | 0 | 0 | 0 | 0 | 0 | 0 | 0 | 0 | 0 | 0  | 0  | 0 | 0 | 0 | 0 | 0 | 0 | 0 | 0 | 0 | 0 | 0 | 0 | 0 | 0 | 0 | 0 | 0 |
|                                                                                                                                                                                                                         | 0 | 0 | 0 | 0 | 0 | 0 | 0 | 0 | 0 | 0  | 0  | 0 | 0 | 0 | 0 | 0 | 0 | 0 | 0 | 0 | 0 | 0 | 0 | 0 | 0 | 0 |   |   |
| M02255_77_000000000-ADUT3_1_1103_19656_19942      A---AC--GT-AG-GTG-----GCA-A-G-----C-G--T---T-GT-C-CGG-AA-----TT-A-C-T--GG-GT-----GT--A---AA-GG-GA-GC-----G-CA-G-G-C-G-----G--A-TT-T-G-C----                           |   |   |   |   |   |   |   |   |   |    |    |   |   |   |   |   |   |   |   |   |   |   |   |   |   |   |   |   |
| -----AA---G-T-T-G-----G-A-A--G-TG--A-AA-CT--C-A-TG-G-G----CT-C-AA-----C-C-C-A-T-G-A-A-C---T-G--C-T---T-T-----C-AA-A-A---C-----T-G-C-AG--A-T-C---T-T-G-A-G-T-G---G-TG---TA-G-A-----G-G-T-A---GG-C-----GG--A--ATT---C-    |   |   |   |   |   |   |   |   |   |    |    |   |   |   |   |   |   |   |   |   |   |   |   |   |   |   |   |   |
| C-C-G-GT--GT-A-G-CG-GT--G---G--A-A---TG-C-GT-AG--AT-A-TC--G-G--G-A-G-G-A-AC-A-CC--AG--T-G--GC-GAA-G--G-C-G-----G--C-C-T-A---CTG--G--GC-A-C-----T-A---A-C-T--GA--CG-C-T-G--A-GG--C-T-CG-A-AA-G-C---A-TG--GG-             |   |   |   |   |   |   |   |   |   |    |    |   |   |   |   |   |   |   |   |   |   |   |   |   |   |   |   |   |
| T--AG-C-A-AA-----CA--GG      Bacteria(100);Firmicutes(100);Clostridia(100);Clostridiales(100);Ruminococcaceae(100);unclassified(100);unclassified(100);unclassified(100);unclassified(100);                             |   |   |   |   |   |   |   |   |   |    |    |   |   |   |   |   |   |   |   |   |   |   |   |   |   |   |   |   |
| Otu1032                                                                                                                                                                                                                 | 0 | 0 | 0 | 0 | 0 | 0 | 0 | 0 | 0 | 0  | 0  | 0 | 0 | 0 | 0 | 0 | 0 | 0 | 0 | 0 | 0 | 0 | 0 | 0 | 0 | 0 | 0 | 0 |
|                                                                                                                                                                                                                         | 0 | 0 | 0 | 0 | 0 | 0 | 0 | 0 | 0 | 21 | 0  | 0 | 0 | 0 | 0 | 0 | 0 | 0 | 0 | 0 | 0 | 0 | 0 | 0 | 0 | 0 | 0 | 0 |
|                                                                                                                                                                                                                         | 0 | 0 | 0 | 0 | 0 | 0 | 0 | 0 | 0 | 0  | 0  | 0 | 0 | 0 | 0 | 0 | 0 | 0 | 0 | 0 | 0 | 0 | 0 | 0 | 0 | 0 | 0 | 0 |
|                                                                                                                                                                                                                         | 0 | 0 | 0 | 0 | 0 | 0 | 0 | 0 | 0 | 0  | 0  | 0 | 0 | 0 | 0 | 0 | 0 | 0 | 0 | 0 | 0 | 0 | 0 | 0 | 0 | 0 |   |   |
| M02255_76_000000000-ADUNE_1_1108_18387_10675      T---AC--CA-GC-ACC-----CCG-A-G-----T-G--G---T-CG-G-GAC-GA-----TT-A-T-T--GG-GC-----CT--A---AA-GC-AT-CC-----G-TA-G-C-C-G-----G--T-CC-T-G-C-----                          |   |   |   |   |   |   |   |   |   |    |    |   |   |   |   |   |   |   |   |   |   |   |   |   |   |   |   |   |
| -----AA---G-T-C-C-----T-C-C--G--TT--A-AA-TC--C-A-CC-C-G----CT-C-AA-----C-G-G-T-T-G-G--G-C---C-G--C-G---G-G-----G-GA-T-A---C-----T-A-C-AG--G-G-C---T-A-G-G-A-G-G---C-GG---GA-G-A-----G-G-C-A---AG-C-----GG--T--ACT---C-  |   |   |   |   |   |   |   |   |   |    |    |   |   |   |   |   |   |   |   |   |   |   |   |   |   |   |   |   |
| G-A-T-GG--GT-A-G-GG-GT--A---A-A-A---TC-C-AC-TG--AT-C-CA--T-T--G-A-A-G-A-CC-A-CC--AG--T-G--GC-GAA-G--G-C-G-----G--C-T-T-G---CCA--G--AA-C-G-----C-G---C-T-C-GA--CG-G-T-G--A-GG--G-A-TG-A-AA-G-C---T-GG--GG-               |   |   |   |   |   |   |   |   |   |    |    |   |   |   |   |   |   |   |   |   |   |   |   |   |   |   |   |   |
| G--AG-C-A-AA-----CC--GG      Bacteria(100);unclassified(100);unclassified(100);unclassified(100);unclassified(100);unclassified(100);unclassified(100);unclassified(100);unclassified(100);                             |   |   |   |   |   |   |   |   |   |    |    |   |   |   |   |   |   |   |   |   |   |   |   |   |   |   |   |   |
| Otu1033                                                                                                                                                                                                                 | 0 | 0 | 0 | 0 | 0 | 0 | 0 | 0 | 0 | 0  | 0  | 0 | 0 | 0 | 0 | 0 | 0 | 0 | 0 | 0 | 0 | 0 | 0 | 0 | 0 | 0 | 0 | 0 |
|                                                                                                                                                                                                                         | 0 | 0 | 0 | 0 | 0 | 0 | 0 | 0 | 0 | 0  | 27 | 0 | 0 | 0 | 0 | 0 | 0 | 0 | 0 | 0 | 0 | 0 | 0 | 0 | 0 | 0 | 0 | 0 |
|                                                                                                                                                                                                                         | 0 | 0 | 0 | 0 | 0 | 0 | 0 | 0 | 0 | 0  | 0  | 0 | 0 | 0 | 0 | 0 | 0 | 0 | 0 | 0 | 0 | 0 | 0 | 0 | 0 | 0 | 0 | 0 |
|                                                                                                                                                                                                                         | 0 | 0 | 0 | 0 | 0 | 0 | 0 | 0 | 0 | 0  | 0  | 0 | 0 | 0 | 0 | 0 | 0 | 0 | 0 | 0 | 0 | 0 | 0 | 0 | 0 | 0 |   |   |
| M02255_77_000000000-ADUT3_1_1102_17943_22346      T---AC--GG-AG-GAT-----GCA-A-G-----C-G--T---T-AT-C-CGG-AA-----TT-A-T-T--GG-GC-----GT--A---AA-GC-GT-CC-----G-CA-G-G-T-G-----G--C-AT-T-T-C-----                          |   |   |   |   |   |   |   |   |   |    |    |   |   |   |   |   |   |   |   |   |   |   |   |   |   |   |   |   |
| -----AA---G-T-C-T-----G-C-T--G--TC--A-AA-GA--C-C-GG-G-G----CT-T-AA-----C-C-C-T-G-G-A-A-A---G-G--C-A---G--T-----G-GA-A-A---C-----T--G-A-AA--C-G-C---T-A-G-A-G-T-G---T-CG---TA-G-G-----G-G-T-A---GA-G-----GG--A--ATT---   |   |   |   |   |   |   |   |   |   |    |    |   |   |   |   |   |   |   |   |   |   |   |   |   |   |   |   |   |
| C-C-T-G-GT--GT-A-G-CG-GT--G---A-A-A---TG-C-GT-AG--AG-A-TC--A-G--G-A-A-G-A-AC-A-TC--GG--T-G--GC-GAA-A-G-C-G-----C--T-C-T-A---CTG--G--AC-G-A-----C-A---A-C-T--GA--CA-C-T-C-A-GG--G-A-CG-A-AA-G-C---T-AG--                 |   |   |   |   |   |   |   |   |   |    |    |   |   |   |   |   |   |   |   |   |   |   |   |   |   |   |   |   |
| GG-G--AG-C-G-AA-----TG--GG      Bacteria(100);Cyanobacteria(100);SubsectionIII(100);unclassified(100);unclassified(100);unclassified(100);unclassified(100);unclassified(100);unclassified(100);                        |   |   |   |   |   |   |   |   |   |    |    |   |   |   |   |   |   |   |   |   |   |   |   |   |   |   |   |   |
| Otu1034                                                                                                                                                                                                                 | 0 | 0 | 0 | 0 | 0 | 0 | 0 | 0 | 0 | 0  | 0  | 0 | 0 | 0 | 0 | 0 | 0 | 0 | 0 | 0 | 0 | 0 | 0 | 2 | 0 | 0 | 0 | 0 |
|                                                                                                                                                                                                                         | 0 | 0 | 0 | 0 | 0 | 0 | 0 | 0 | 0 | 0  | 0  | 0 | 0 | 0 | 0 | 0 | 0 | 0 | 0 | 0 | 0 | 0 | 0 | 0 | 0 | 0 | 0 | 0 |
|                                                                                                                                                                                                                         | 0 | 0 | 0 | 0 | 0 | 0 | 0 | 0 | 0 | 0  | 0  | 0 | 0 | 0 | 0 | 0 | 0 | 0 | 0 | 0 | 0 | 0 | 0 | 0 | 0 | 0 | 0 | 0 |
|                                                                                                                                                                                                                         | 0 | 0 | 0 | 0 | 0 | 3 | 0 | 0 | 0 | 0  | 0  | 0 | 0 | 0 | 0 | 0 | 0 | 0 | 0 | 0 | 0 | 0 | 0 | 0 | 0 | 0 |   |   |
| M02255_77_000000000-ADUT3_1_2107_7832_20233 T---AC--GA-AG-GGG-----GCG-A-G-----C-G--T---T-GT-T-CGG-AA-----TT-A-C-T--GG-GC-----GT--A---AA-GG-GT-GT-----G-TA-G-G-C-G-----G--T-TA-A-G-T-----                                |   |   |   |   |   |   |   |   |   |    |    |   |   |   |   |   |   |   |   |   |   |   |   |   |   |   |   |   |
| AA---G-A-T-A-----G-T-G--G-TG--A-AA-TG--C-C-GG-G-G----CT-C-AA-----C-C-T-C-G-G-A-A-T---T-G--C-C---A-T-----T-AT-G-A---C-----T-A-T--TT--A-G-C---T-A-G-A-A-T-G---A-TG---CA-G-A-----G-G-A-T---AG-C-----GG--A--ATA---C-C-C-    |   |   |   |   |   |   |   |   |   |    |    |   |   |   |   |   |   |   |   |   |   |   |   |   |   |   |   |   |
| A-GT--GT-A-G-AG-GT--G---A-A-A---TT-C-GT-AG--AT-A-TT--G-G--G-T-A-G-A-AC-A-CC--AG--A--G--GC-GAA-G--G-C-G-----G--C-T-A-T---CTG--G--GC-A-T-----T-G---A-T-T-GA--CG-C-T-G--A-GG--C-A-CG-A-AA-G-C---A-TG--GG-G--AT-            |   |   |   |   |   |   |   |   |   |    |    |   |   |   |   |   |   |   |   |   |   |   |   |   |   |   |   |   |
| C-A-AA-----CA--GG      Bacteria(100);Proteobacteria(100);Alphaproteobacteria(100);unclassified(100);unclassified(100);unclassified(100);unclassified(100);unclassified(100);unclassified(100);                          |   |   |   |   |   |   |   |   |   |    |    |   |   |   |   |   |   |   |   |   |   |   |   |   |   |   |   |   |



|                                                                                                                                                                                                                           |   |   |   |   |    |   |   |   |    |   |    |   |   |   |   |   |    |    |    |   |   |   |   |   |    |    |   |   |
|---------------------------------------------------------------------------------------------------------------------------------------------------------------------------------------------------------------------------|---|---|---|---|----|---|---|---|----|---|----|---|---|---|---|---|----|----|----|---|---|---|---|---|----|----|---|---|
| Otu1035                                                                                                                                                                                                                   | 0 | 0 | 0 | 0 | 0  | 0 | 0 | 0 | 0  | 0 | 0  | 0 | 0 | 0 | 0 | 0 | 0  | 0  | 0  | 0 | 0 | 0 | 0 | 2 | 0  | 0  | 0 | 0 |
|                                                                                                                                                                                                                           | 0 | 0 | 0 | 3 | 0  | 0 | 0 | 0 | 0  | 0 | 7  | 0 | 0 | 0 | 2 | 9 | 0  | 0  | 0  | 0 | 0 | 0 | 0 | 0 | 0  | 0  | 1 | 0 |
|                                                                                                                                                                                                                           | 0 | 5 | 0 | 0 | 0  | 0 | 0 | 0 | 0  | 2 | 0  | 0 | 0 | 0 | 0 | 0 | 6  | 39 | 16 | 0 | 0 | 0 | 0 | 0 | 0  | 22 | 0 | 0 |
|                                                                                                                                                                                                                           | 0 | 5 | 0 | 0 | 16 | 2 | 0 | 0 | 17 | 0 | 21 | 0 | 0 | 0 | 0 | 0 | 0  | 0  | 0  | 0 | 4 | 0 | 0 | 0 | 0  |    |   |   |
| M02255_77_000000000-ADUT3_1_2110_11611_21365 T---AC---GT-AA-GGG-----GCG-A-G-----C-G-T---T-GT-C-CGG-AA-----TT-A-T-T--GG-GC-----GT-A---AA-GA-GT-GC-----G-TA-G-G-C-G-----G-C-AA-A-T-T-----                                   |   |   |   |   |    |   |   |   |    |   |    |   |   |   |   |   |    |    |    |   |   |   |   |   |    |    |   |   |
| -----AA---G-T-C-A-----G-A-T-G--TG--A-AA-AC--T-A-AG-G-G-----CT-C-AA-----C-C-C-A-T-A-G--A-T---T-G--C-A---T-C-----T-GA-A-A---C-----T-G-A-TA-T-G-C---T-T-G-A-G-T-C---A-AG-----GA-G-A-----G-G-A-A---AG-T-----GG--A--ATT---C-   |   |   |   |   |    |   |   |   |    |   |    |   |   |   |   |   |    |    |    |   |   |   |   |   |    |    |   |   |
| C-T-A-GT--GT-A-G-CG-GT--G---G--A-A---TG-C-GT-AG--AT-A-TT--A-G--G-A-G-G-A-AT-G-CC---GG--T--G--GC-GAA-G--G-C--G-----A-C-T-T-T---CTG--G--AC-T-T-----G-A---A-C-T--GA--CG-C-T-G--A-GG--C-A-CG-A--AA-G-C---G-TG--GG-G-          |   |   |   |   |    |   |   |   |    |   |    |   |   |   |   |   |    |    |    |   |   |   |   |   |    |    |   |   |
| -AG-C-A-AA-----CA--GG Bacteria(100);unclassified(100);unclassified(100);unclassified(100);unclassified(100);unclassified(100);unclassified(100);unclassified(100);unclassified(100);                                      |   |   |   |   |    |   |   |   |    |   |    |   |   |   |   |   |    |    |    |   |   |   |   |   |    |    |   |   |
| Otu1036                                                                                                                                                                                                                   | 0 | 0 | 0 | 0 | 0  | 0 | 0 | 0 | 0  | 0 | 0  | 0 | 0 | 0 | 0 | 0 | 0  | 0  | 0  | 0 | 0 | 0 | 0 | 0 | 0  | 0  | 0 | 0 |
|                                                                                                                                                                                                                           | 0 | 0 | 0 | 0 | 0  | 0 | 0 | 0 | 0  | 0 | 32 | 0 | 0 | 0 | 0 | 0 | 0  | 0  | 0  | 0 | 0 | 0 | 0 | 0 | 0  | 0  | 0 | 0 |
|                                                                                                                                                                                                                           | 0 | 0 | 0 | 0 | 0  | 0 | 0 | 0 | 0  | 0 | 0  | 0 | 0 | 0 | 0 | 0 | 0  | 0  | 0  | 0 | 0 | 0 | 0 | 0 | 0  | 0  | 0 | 0 |
|                                                                                                                                                                                                                           | 0 | 0 | 0 | 0 | 0  | 0 | 0 | 0 | 0  | 0 | 0  | 0 | 0 | 0 | 0 | 0 | 0  | 0  | 0  | 0 | 0 | 0 | 0 | 0 | 0  | 0  | 0 | 0 |
| M02255_77_000000000-ADUT3_1_1102_20964_21329 T---AC---GT-AG-GGC-----GCA-A-G-----C-G-T---T-GT-C-CGG-AA-----TT-A-T-T--GG-GC-----GT-A---AA-GA-GC-TC-----G-TA-G-G-C-G-----G-T-TT-A-T-C-----                                   |   |   |   |   |    |   |   |   |    |   |    |   |   |   |   |   |    |    |    |   |   |   |   |   |    |    |   |   |
| -----AC---G-T-C-G-----G-C-T-G--TG--A-AA-TC--C-C-GA-G-G-----CT-T-AA-----C-C-T-C-G-G-G--C-C---T-G--C-A---G-T-----C--GA-T-A---C-----G-G-G--TT-G-A-C---T-A-G-A-G-T-G---A-AG-----CA-G-G-----G-G-A-G---AC-T-----GG--A--ATT---C- |   |   |   |   |    |   |   |   |    |   |    |   |   |   |   |   |    |    |    |   |   |   |   |   |    |    |   |   |
| C-T-G-GT--GT-A-G-CG-GT--G---A--A-A---TG-C-GC-AG--AT-A-TC--A-G--G-A-G-G-A-AC-A-CC---GG--T--G--GC-GAA-G--G-C--G-----G--G-T-C-T---CTG--G--GC-T-T-----T-A---A-C-T--GA--CG-C-T-G--A-GG--A-G-CG-A--AA-G-C---G-TG--GG-           |   |   |   |   |    |   |   |   |    |   |    |   |   |   |   |   |    |    |    |   |   |   |   |   |    |    |   |   |
| T--AG-C-A-AA-----CA--GG Bacteria(100);Actinobacteria(100);Actinobacteria(100);Actinobacteridae(100);Actinomycetales(100);unclassified(100);unclassified(100);unclassified(100);unclassified(100);                         |   |   |   |   |    |   |   |   |    |   |    |   |   |   |   |   |    |    |    |   |   |   |   |   |    |    |   |   |
| Otu1037                                                                                                                                                                                                                   | 0 | 0 | 0 | 0 | 0  | 0 | 0 | 0 | 0  | 0 | 0  | 0 | 0 | 0 | 0 | 0 | 0  | 0  | 0  | 0 | 0 | 0 | 0 | 0 | 7  | 0  | 0 | 0 |
|                                                                                                                                                                                                                           | 0 | 0 | 0 | 0 | 0  | 0 | 0 | 0 | 0  | 0 | 0  | 0 | 0 | 0 | 0 | 0 | 0  | 0  | 0  | 0 | 0 | 0 | 0 | 0 | 0  | 0  | 0 | 0 |
|                                                                                                                                                                                                                           | 0 | 0 | 0 | 0 | 0  | 0 | 0 | 0 | 0  | 0 | 0  | 0 | 0 | 0 | 0 | 0 | 0  | 0  | 0  | 0 | 0 | 0 | 0 | 0 | 0  | 0  | 0 | 0 |
|                                                                                                                                                                                                                           | 0 | 0 | 0 | 0 | 0  | 0 | 0 | 0 | 0  | 0 | 0  | 0 | 0 | 0 | 1 | 0 | 10 | 0  | 0  | 0 | 0 | 0 | 0 | 0 | 0  | 0  |   |   |
| M02255_76_000000000-ADUNE_1_1110_28552_13713 T---AC---GT-AG-GTG-----GCA-A-G-----C-G-T---T-GT-C-CGG-AA-----TT-A-C-T--GG-GT-----GT-A---AA---G--G-----G-A-----T-GC--G-C-----                                                 |   |   |   |   |    |   |   |   |    |   |    |   |   |   |   |   |    |    |    |   |   |   |   |   |    |    |   |   |
| AA---G-T-T-G-----G-A-T-G--TG--A-AA-AC--T-C-CG-G-G-----CT-C-AA-----C-C-C-G-G-A-G--C-C---T-G--C-A---T-T-----C-AA-A-A---C-----T-G-C--TG--T-T-C---T-T-G-A-G-T-G---A-AG-----TA-G-A-----G-G-C-A---GG-C-----GG--A--ATT---C-C-C-  |   |   |   |   |    |   |   |   |    |   |    |   |   |   |   |   |    |    |    |   |   |   |   |   |    |    |   |   |
| G-GT--GT-A-G-CG-GT--G---A--A-A---TG-C-GT-AGA-T--A-TC--G-G--G-A-G-G-A-AC-A-CC---AG--T--G--GC-GAA-G--G-C--G-----G--C-C-T-G---CTG--G--GC-T-T-----T-T---A-C-T--GA--CG-C-T-G--A-GG--C-A-CG-A--AA-G-C---A-TG--GG-T--            |   |   |   |   |    |   |   |   |    |   |    |   |   |   |   |   |    |    |    |   |   |   |   |   |    |    |   |   |
| AG-C-A-AA-----CA--GG Bacteria(100);Firmicutes(100);Clostridia(100);Clostridiales(100);Ruminococcaceae(100);Ethanoligenens(100);unclassified(100);unclassified(100);unclassified(100);                                     |   |   |   |   |    |   |   |   |    |   |    |   |   |   |   |   |    |    |    |   |   |   |   |   |    |    |   |   |
| Otu1038                                                                                                                                                                                                                   | 0 | 0 | 0 | 0 | 0  | 0 | 0 | 0 | 0  | 0 | 0  | 0 | 0 | 0 | 0 | 0 | 0  | 0  | 0  | 0 | 0 | 0 | 0 | 0 | 14 | 0  | 0 | 0 |
|                                                                                                                                                                                                                           | 0 | 0 | 0 | 0 | 0  | 0 | 0 | 0 | 0  | 0 | 0  | 0 | 0 | 0 | 0 | 0 | 0  | 0  | 0  | 0 | 0 | 0 | 0 | 0 | 0  | 0  | 0 | 0 |
|                                                                                                                                                                                                                           | 0 | 0 | 0 | 0 | 0  | 0 | 0 | 0 | 0  | 0 | 0  | 0 | 0 | 0 | 0 | 0 | 0  | 0  | 0  | 0 | 0 | 0 | 0 | 0 | 0  | 0  | 0 | 0 |
|                                                                                                                                                                                                                           | 0 | 0 | 0 | 0 | 0  | 0 | 0 | 0 | 0  | 0 | 0  | 0 | 0 | 0 | 0 | 0 | 0  | 0  | 0  | 0 | 0 | 0 | 0 | 0 | 0  | 0  |   |   |
| M02255_77_000000000-ADUT3_1_1102_9137_9211 G---AC---GG-AG-GGT-----GCT-A-G-----C-G-T---T-GT-T-CGG-AA-----TT-A-C-T--GG-GC-----GT-A---AA-GG-GC-GC-----G-TA-G-G-C-G-----G-C-TC-T-T-T-----CA-                                  |   |   |   |   |    |   |   |   |    |   |    |   |   |   |   |   |    |    |    |   |   |   |   |   |    |    |   |   |
| ---G-T-C-G-----G-A-T-G--TG--A-AA-GC--C-C-GG-G-G-----CT-C-AA-----C-C-C-C-G-G-A--A-C---G-G--C-A---T-C-----C-GA-G-A---C-----G-G-G--AG--G-G-C---T-C-G-A-G-A---C---C-GG-----GA-G-A-----G-G-A-G---GG-T-----GG--A--ATA---G-C-C-  |   |   |   |   |    |   |   |   |    |   |    |   |   |   |   |   |    |    |    |   |   |   |   |   |    |    |   |   |
| A-GT--GT-A-G-AG-GT--G---A--A-A---TT-C-GT-AG--AT-A-TT--G-G--C-T-G-G-A-AC-A-CC---GG--T--G--GC-GAA-A--G-C--G-----G--C-T-C-T---CTG--G--CC-C-G-----G-T---T-C-T--GA--CG-C-T-G--A-GG--C-G-CG-A--AA-G-C---G-T-G-GG-G--AG-         |   |   |   |   |    |   |   |   |    |   |    |   |   |   |   |   |    |    |    |   |   |   |   |   |    |    |   |   |
| C-A-AA-----CA--GG Bacteria(100);Proteobacteria(100);Alphaproteobacteria(100);Rhodospirillales(100);Candidatus_Alysiosphaera(100);unclassified(100);unclassified(100);unclassified(100);unclassified(100);                 |   |   |   |   |    |   |   |   |    |   |    |   |   |   |   |   |    |    |    |   |   |   |   |   |    |    |   |   |
| Otu1039                                                                                                                                                                                                                   | 0 | 0 | 0 | 0 | 0  | 0 | 0 | 0 | 0  | 0 | 0  | 0 | 0 | 0 | 0 | 0 | 0  | 0  | 0  | 0 | 0 | 0 | 0 | 0 | 10 | 0  | 0 | 0 |
|                                                                                                                                                                                                                           | 0 | 0 | 0 | 0 | 0  | 0 | 0 | 0 | 0  | 0 | 0  | 0 | 0 | 0 | 0 | 0 | 0  | 0  | 0  | 0 | 0 | 0 | 0 | 0 | 0  | 0  | 0 | 0 |
|                                                                                                                                                                                                                           | 0 | 0 | 0 | 0 | 0  | 0 | 0 | 0 | 0  | 0 | 0  | 0 | 0 | 0 | 0 | 0 | 0  | 0  | 0  | 0 | 0 | 0 | 0 | 0 | 0  | 0  | 0 | 0 |
|                                                                                                                                                                                                                           | 0 | 0 | 0 | 0 | 0  | 0 | 0 | 0 | 0  | 0 | 0  | 0 | 0 | 0 | 0 | 0 | 0  | 0  | 0  | 0 | 0 | 0 | 0 | 0 | 0  | 0  |   |   |
| M02255_77_000000000-ADUT3_1_1107_5276_18246 T---AC---GT-AG-GTG-----GCA-A-G-----C-G--T---T-GT-C-CGG-AA-----TT-A-T-T--GG-GC-----GT--A---AA-GG-GC-GC-----G-TA-G-G-C-G-----G-C-CT-T-C-T-----AA-                               |   |   |   |   |    |   |   |   |    |   |    |   |   |   |   |   |    |    |    |   |   |   |   |   |    |    |   |   |
| ---G-T-C-A-----G-A-T-G--TG--A-AA-TC--C-C-TG-G-G-----CT-T-AA-----C-C-T-G-G-G-T--A-G---T-G--C-A---T-T-----T-GA-A-A---C-----T-G-G--AG--G-G-C---T-T-G-A-G-T-G---C-AG-----GA-G-A-----G-G-T-A---AG-T-----GG--A--ATT---C-C-T-A-  |   |   |   |   |    |   |   |   |    |   |    |   |   |   |   |   |    |    |    |   |   |   |   |   |    |    |   |   |
| GT--GT-A-G-CG-GT--G---A--A-A---TG-C-GT-AG---ATA-TT--A-G--G-A-G-G-A-AC-A-CC---AG--T--G--GC-GAA-G--G-C--G-----A-C-T-T-A---CTG--G--AC-T-G-----T-A---A-C-T--GA--CG-C-T-G--A-GG--C-G-CG-A--AA-G-C---G-TG--GG-G--AG-            |   |   |   |   |    |   |   |   |    |   |    |   |   |   |   |   |    |    |    |   |   |   |   |   |    |    |   |   |
| C-A-AA-----CA--GG Bacteria(100);Firmicutes(100);Clostridia(100);Clostridiales(100);unclassified(100);unclassified(100);unclassified(100);unclassified(100);unclassified(100);                                             |   |   |   |   |    |   |   |   |    |   |    |   |   |   |   |   |    |    |    |   |   |   |   |   |    |    |   |   |



Otu1040 0 0 0 0 0 0 0 0 0 0 0 0 0 0 0 0 0 0 0 0 0 0 0 0 5 0 0 0  
0 0 0 0 0 0 0 0 0 0 0 0 0 0 0 0 0 0 0 0 0 0 0 0 0 0 0 0  
0 0 0 0 0 0 0 0 0 0 0 0 0 0 0 0 0 0 0 0 0 0 0 0 0 0 0 0  
0 0 0 0 0 0 0 0 0 0 0 0 0 0 0 0 0 0 0 0 0 0 0 0 0 0  
M02255\_77\_000000000-ADUT3\_1\_2117\_20533\_9161 T---AC---GT-AG-GGG-----GCG-A-G-----C--G--T---T--GT-C-CGA-AG-----TT-A--C-T--GG-GC-----GT--A----AA-GA-GC-GC-----G-TA-G-G-C-G-----G--G-TT-C-T-T-----  
AA---G-T-G-A-----G-G-G--G--TG--A-AA-GG--T-TCAG-G-G-----CT-C-AA-----C-C-C-G-G-A-C--A-C---T-G--C-C---T--T-----T--CA-T-A--C-----T--G-G--GA--A-C-C---T-T-G-A-G-T--G---C-GG-----GA-G-A-----G-G-C-G---AG-T-----GG--A--ATG---G-C-  
T-G-GT--GT-A-G-CG-GT--G---A--A---TG-C-GT-AG--AT-A-TC--A-G--T-C-G-G-A-AC-A-CC---CA--T--G--GC-GAA-G--G-C--A-----G--C-T-C-G---CTG--G--CC-T-G-----C-A---A-C-T--GA--CG-C-T-G--A-GG--C-G-CG-A--AA-G-C---G-TG--GG-G--  
AG-C-A-AA-----CA--GG Bacteria(100);unclassified(100);unclassified(100);unclassified(100);unclassified(100);unclassified(100);unclassified(100);unclassified(100);unclassified(100);

Otu1041 0 0 0 0 0 0 0 0 0 0 0 0 0 0 0 0 0 0 0 0 0 0 0 0 0 0 0 0  
0 0 0 0 0 0 0 0 0 0 0 30 0 0 0 0 0 0 0 0 0 0 0 0 0 0 0 0  
0 0 0 0 0 0 0 0 0 0 0 0 0 0 0 0 0 0 0 0 0 0 0 0 0 0 0 0  
0 0 0 0 0 0 0 0 0 0 0 0 0 0 0 0 0 0 0 0 0 0 0 0 0 0  
M02255\_77\_000000000-ADUT3\_1\_1101\_4213\_10105 T---AC---GA-AG-GGG-----GCT-A-G-----C--G--T---T--GT-T-CGG-AA-----TT-A--C-T--GG-GC-----GT--A----AA-GC-GC-AC-----G-TA-G-G-C-G-----G--A-TT-G-T-T-----AA-  
---G-T-G-A-----G-G-G--G--TG--A-AA-TC--C-C-AG-G-G-----CT-C-AA-----C-C-C-T-G-G-A--A-C---T-G--C-C---T--C-----T--CA-T-A--C-----T--G-G--CA--A-T-C---T-T-G-A-G-T--A---T-GG-----AA-G-A-----G-G-T-G---AG-T-----GG--A--ATT---C-C-G-A-  
GT--GT-A-G-AG-GT--G---A--A---TT-C-GT-AG--AT-A-TT--C-G--G-A-G-G-A-AC-A-CC---AG--T--G--GC-GAA-G--G-C--G-----G--C-T-C-A---CTG--G--TC-C-A-----T-T--A-C-T--GA--CG-C-T-G--A-GG--T-G-CG-A--AA-G-C---G-TG--GG-G--AG-C-  
A-AA-----CA--GG Bacteria(100);Proteobacteria(100);Alphaproteobacteria(100);Rhizobiales(100);unclassified(100);unclassified(100);unclassified(100);unclassified(100);unclassified(100);

Otu1042 0 0 0 0 0 0 0 0 0 0 0 0 0 0 0 0 0 0 0 0 0 0 0 0 0 8 0 6 0  
0 0 0 0 0 0 0 0 0 0 0 0 0 0 0 0 0 0 0 0 0 0 0 0 0 0 0 0  
0 0 0 0 0 0 0 0 0 0 0 0 0 0 0 14 0 8 0 0 0 0 0 0 0 0 0 0  
0 0 0 115 0 0 0 0 0 0 0 0 0 0 0 0 0 0 0 0 0 0 0 0 9 0 0  
M02255\_77\_000000000-ADUT3\_1\_2118\_14877\_11874 T---AC---GG-AG-GGG-----GCT-A-G-----C--G--T---T--GT-T-CGG-AA-----AT-A--C-T--GG-GC-----GT--A----AA-GC-GA-AC-----G-TA-G-G-C-G-----G--C-TT-G-G-C---  
-----AA---G-T-C-A-----G-G-G--G--TG--A-AA-TC--C-C-AG-T-G-----CT-C-AA-----C-A-C-T-G-G-A--A-C---T-G--C-C---T--T-----T--GA-A-A--C-----T--G-C--CA--G-G-C---T-T-G-A-A-T--C---C-TG-----GA-G-A-----G-G-C-G---AG-T-----GG--A--ATT---  
C-C-G-A-GT--GT-A-G-AG-GT--G---A--A---TT-C-GT-AG--AT-A-TT--C-G--G-A-A-G-A-AC-A-CC---AG--T--G--GC-GAA-G--G-C--G-----A--C-T-C-G---CTG--G--AC-A-G-----G-T--A-T-T--GA--CG-C-T-G--A-GG--T-T-CG-A--AA-G-C---G-TG--GG-  
G--AG-C-A-AA-----CA--GG Bacteria(100);Proteobacteria(100);Alphaproteobacteria(100);Sphingomonadales(100);unclassified(100);unclassified(100);unclassified(100);unclassified(100);unclassified(100);

Otu1043 0 0 0 0 0 0 0 0 0 0 0 0 0 0 0 0 0 0 0 0 0 0 0 0 0 0 0 0  
0 0 0 0 0 0 0 0 0 0 0 18 0 0 0 0 0 0 0 0 0 0 0 0 0 0 0 0  
0 0 0 0 0 0 0 0 0 0 0 0 0 0 0 0 0 0 0 0 0 0 0 0 0 0 0 0  
0 0 0 0 0 0 0 0 0 0 0 0 0 0 0 0 0 0 0 0 0 0 0 0 0 0  
M02255\_76\_000000000-ADUNE\_1\_1105\_19166\_19700 T---A---AC-TC-TGT-----GCC-A-G-----C---A---G--CC-G-CGG-TA-----AG-A--C-A--GA-GG-----GT--G---CA--A-AC-GT-----TG-C-T-C-G-----G--G-AC-T-T-T-----  
--AA---G-T-C-G-----G-G-T--G--TG--A-AA-TC--C-C-TG-G-G-----CT-C-AA-----C-C-T-A-G-G-A--A-C---T-G--C-A---T--C-----C--GA-A-A--C-----T--G-A--GG--T-T-C---T-G-G-A-G-T--A---G-TG-----GA-G-A-----G-G-A-A---AG-C-----GG--A--ATT---C-C-  
G-G-GT--GT-A-G-AG-GT--G---A--A---TT-C-GT-AG--AT-A-TC--C-G--G-A-G-G-A-AC-A-CC---AG--T--G--GC-GAA-G--G-C--G-----G--C-T-T-T---CTG--G--AC-A-C-----T-A---A-C-T--GA--CG-C-T-G--A-GA--T-G-CG-A--AA-G-C---G-TG--GG-G--  
AG-C-A-AA-----CA--GG Bacteria(100);Proteobacteria(100);unclassified(100);unclassified(100);unclassified(100);unclassified(100);unclassified(100);unclassified(100);unclassified(100);

Otu1044 0 0 0 0 0 0 0 0 0 0 0 0 0 0 0 0 0 0 0 0 0 0 0 0 0 0 0 0  
0 0 0 0 0 0 0 0 0 0 0 0 0 0 0 0 0 0 0 0 0 0 0 0 0 0 0 0  
0 0 0 0 0 0 0 0 0 0 0 0 0 0 0 0 0 0 75 0 0 0 0 0 0 0 0 0  
0 0 0 0 0 0 0 0 0 0 0 0 0 0 0 0 0 0 0 0 0 0 0 0 0  
M02255\_77\_000000000-ADUT3\_1\_1119\_18609\_17999 T---AC---GA-AG-GGG-----GCT-A-G-----C--G--T---T--GT-T-CGG-AA-----TT-A--C-T--GG-GC-----GT--A----AA-GC-GC-AC-----G-TA-G-G-C-G-----G--A-TT-G-T-T-----  
-----AA---G-T-G-A-----G-G-G--G--TG--A-AA-TC--C-C-AG-G-G-----CT-C-AA-----C-C-C-T-G-G-A--A-C---T-G--C-C---T--T-----T--CA-T-A--C-----T--G-G--CA--A-T-C---T-A-G-A-G-T--C---C-AG-----AA-G-A-----G-G-T-G---AG-T-----GG--A--ATT---C-C-  
C-G-A-GT--GT-A-G-AG-GT--G---A--A---TT-C-GT-AG--AT-A-TT--C-G--G-A-G-G-A-AC-A-CC---AG--T--G--GC-GAA-G--G-C--G-----G--C-T-C-A---CTG--G--TC-T-G-----G-A---A-C-T--GA--CG-C-T-G--A-GG--T-G-CG-A--AA-G-C---G-TG--GG-  
G--AG-C-A-AA-----CA--GG Bacteria(100);Proteobacteria(100);Alphaproteobacteria(100);Rhizobiales(100);unclassified(100);unclassified(100);unclassified(100);unclassified(100);unclassified(100);



[illegible]



|                                                                                                                                                                                                                                                                                                                                                                                                                                                                                                                                                                                                                                                                                                                                                                                                                                                |   |   |   |   |   |   |    |    |    |   |   |   |   |   |   |    |    |   |   |    |   |   |   |   |    |   |    |
|------------------------------------------------------------------------------------------------------------------------------------------------------------------------------------------------------------------------------------------------------------------------------------------------------------------------------------------------------------------------------------------------------------------------------------------------------------------------------------------------------------------------------------------------------------------------------------------------------------------------------------------------------------------------------------------------------------------------------------------------------------------------------------------------------------------------------------------------|---|---|---|---|---|---|----|----|----|---|---|---|---|---|---|----|----|---|---|----|---|---|---|---|----|---|----|
| Otu1050                                                                                                                                                                                                                                                                                                                                                                                                                                                                                                                                                                                                                                                                                                                                                                                                                                        | 0 | 0 | 0 | 0 | 0 | 0 | 0  | 0  | 0  | 0 | 0 | 0 | 0 | 0 | 0 | 0  | 0  | 0 | 0 | 0  | 0 | 0 | 0 | 0 | 0  | 0 | 0  |
|                                                                                                                                                                                                                                                                                                                                                                                                                                                                                                                                                                                                                                                                                                                                                                                                                                                | 0 | 0 | 0 | 0 | 0 | 0 | 0  | 12 | 0  | 0 | 0 | 0 | 0 | 0 | 0 | 0  | 0  | 0 | 0 | 0  | 0 | 0 | 0 | 0 | 0  | 0 | 0  |
|                                                                                                                                                                                                                                                                                                                                                                                                                                                                                                                                                                                                                                                                                                                                                                                                                                                | 0 | 0 | 0 | 0 | 0 | 0 | 0  | 0  | 0  | 0 | 0 | 0 | 0 | 0 | 0 | 0  | 0  | 0 | 0 | 0  | 0 | 0 | 0 | 0 | 0  | 0 | 0  |
|                                                                                                                                                                                                                                                                                                                                                                                                                                                                                                                                                                                                                                                                                                                                                                                                                                                | 0 | 0 | 0 | 0 | 0 | 0 | 0  | 0  | 0  | 0 | 0 | 0 | 0 | 0 | 0 | 0  | 0  | 0 | 0 | 0  | 0 | 0 | 0 | 0 | 0  | 0 |    |
| M02255_76_000000000-ADUNE_1_1119_26109_9337 C---TA--AC-TC-CGT-----GCC-A-G-----C---A--G--CC-G-CGG-TA-----AT-A-C-G--GG-GG-----GG--G---CA-AG-CG-TT-----G-T---T-C-G-----G--A-CA-A-C-T-----AA---<br>-G-T-C-A-----G-A-C--G--TG--A-AA-TC--C-C-CA-G-G-----CT-C-AA-----C-C-T-G-G-G-A-A-C---T-G-C-G---T-C-----T--GA-T-A--C-----T--G-G--AT--G-G-C---T-T-G-A-A-T--T---C-GG----GA-G-A-----G-G-G-A--TG-C-----AG--A--ATT---C-C-A-G-<br>GT--GT-A-G-CG-GT--G---A--A---TG-C-GT-AG--AT-A-TC--T-G--G-A-G-G-A-AT-A-CC---GG--T--G--GC-GAA-G--G-C-G-----G--C-A-T-C---CTG--G--AC-C-G-----A-C---A-T-T--GA--CG-C-T-G--A-GG--A-G-CG-A--AA-G-C---T-AG--GG-G--AG-<br>C-A-AA-----CG--GG Bacteria(100);Acidobacteria(100);Acidobacteria(100);Acidobacteriales(100);Acidobacteriaceae(100);uncultured(100);unclassified(100);unclassified(100);unclassified(100);              |   |   |   |   |   |   |    |    |    |   |   |   |   |   |   |    |    |   |   |    |   |   |   |   |    |   |    |
| Otu1051                                                                                                                                                                                                                                                                                                                                                                                                                                                                                                                                                                                                                                                                                                                                                                                                                                        | 0 | 0 | 0 | 0 | 0 | 0 | 0  | 0  | 0  | 0 | 0 | 0 | 0 | 0 | 0 | 0  | 0  | 0 | 0 | 0  | 0 | 0 | 0 | 0 | 0  | 0 | 30 |
|                                                                                                                                                                                                                                                                                                                                                                                                                                                                                                                                                                                                                                                                                                                                                                                                                                                | 0 | 0 | 0 | 0 | 0 | 0 | 0  | 0  | 5  | 9 | 0 | 0 | 0 | 0 | 0 | 51 | 50 | 0 | 0 | 0  | 0 | 0 | 0 | 0 | 0  | 0 | 0  |
|                                                                                                                                                                                                                                                                                                                                                                                                                                                                                                                                                                                                                                                                                                                                                                                                                                                | 0 | 0 | 0 | 0 | 0 | 0 | 0  | 0  | 0  | 0 | 0 | 0 | 0 | 0 | 0 | 0  | 0  | 0 | 0 | 23 | 0 | 0 | 0 | 0 | 0  | 0 | 0  |
|                                                                                                                                                                                                                                                                                                                                                                                                                                                                                                                                                                                                                                                                                                                                                                                                                                                | 0 | 0 | 0 | 0 | 0 | 0 | 0  | 0  | 71 | 0 | 0 | 0 | 0 | 0 | 0 | 0  | 0  | 0 | 0 | 0  | 0 | 0 | 0 | 0 | 0  | 0 |    |
| M02255_77_000000000-ADUT3_1_1107_11172_15391 T---AC--GT-AT-GTC-----GCA-A-G-----C--G--T---T--AT-C-CGG-AT-----TT-A--T-T--GG-GC-----GT--A---AA-GC-GC-GT-----C-TA-G-G-C-G-----G--G-AA-A-G-C-----<br>----AA---G-T-C-T-----G-A-T--G--TG--A-AA-AT--G-C-GG-G-G-----CT-C-AA-----C-T-C-C-G-T-A--T-----T-G--C-G---T-T-----G--GA-A-A--C-----T--A-C--TT--T-T-C---T-A-G-A-G-T--A--T-CA---GA-G-A-----G-G-T-G--GG-C-----GG--A--ACT---A-C-<br>A-A-GT--GT-A-G-AG-GT--G---A--A---TT-C-GT-AG--AT-A-TT--T-G--T-A-G-G-A-AT-G-CC--GA--T--G--GA-GAA-G--T-C-A-----G--C-T-C-A--CTG--G--AT-G-A-----A-T---A-C-T--GA--CG-C-T-A--A-AG--C-G-CG-A--AA-G-C---G-TG--GG-G--<br>AG-C-A-AA-----CA--GG Bacteria(100);Fusobacteria(100);Fusobacteria(100);Fusobacteriales(100);Fusobacteriaceae(100);unclassified(100);unclassified(100);unclassified(100);unclassified(100);         |   |   |   |   |   |   |    |    |    |   |   |   |   |   |   |    |    |   |   |    |   |   |   |   |    |   |    |
| Otu1052                                                                                                                                                                                                                                                                                                                                                                                                                                                                                                                                                                                                                                                                                                                                                                                                                                        | 0 | 0 | 0 | 0 | 0 | 0 | 0  | 0  | 0  | 0 | 0 | 0 | 0 | 0 | 0 | 0  | 0  | 0 | 0 | 0  | 0 | 0 | 0 | 0 | 0  | 0 | 15 |
|                                                                                                                                                                                                                                                                                                                                                                                                                                                                                                                                                                                                                                                                                                                                                                                                                                                | 0 | 0 | 0 | 0 | 0 | 0 | 0  | 0  | 0  | 0 | 0 | 0 | 0 | 0 | 0 | 0  | 0  | 0 | 0 | 0  | 0 | 0 | 0 | 0 | 0  | 0 |    |
|                                                                                                                                                                                                                                                                                                                                                                                                                                                                                                                                                                                                                                                                                                                                                                                                                                                | 0 | 0 | 0 | 0 | 0 | 0 | 0  | 0  | 0  | 0 | 0 | 0 | 0 | 0 | 0 | 0  | 0  | 0 | 0 | 0  | 0 | 0 | 0 | 0 | 0  | 0 |    |
|                                                                                                                                                                                                                                                                                                                                                                                                                                                                                                                                                                                                                                                                                                                                                                                                                                                | 0 | 0 | 0 | 0 | 0 | 0 | 0  | 0  | 0  | 0 | 0 | 0 | 0 | 0 | 0 | 0  | 0  | 0 | 0 | 0  | 0 | 0 | 0 | 0 | 0  | 0 |    |
| M02255_77_000000000-ADUT3_1_1107_7750_22606 T---AC--GA-GT-GCC-----CCA-A-G-----C--G--T---T--AT-C-CGG-AA-----TT-A--T-T--GG-GC-----GT--A---AA-GG-GT-GT-----G-TA-G-G-T-G-----G--T-TT-C-G-T-----TA--<br>--G-T-C-T-----T-C-T--G--TC--A-AA-TT--C-T-TC-G-G-----CT-T-AA-----C-C-G-G-G-G-G--C-A---T-G--C-A--G--G-----G--GA-A-A--C-----G--G-C--GG--A-AC---T-A-G-A-G-G-A--T-GC---GA-G-A-----G-G-T-A--AA-T-----GG--A--ACT---C-A-T-G-<br>GA--GT-A-G-GG-GT--G---A--A---TC-C-GT-TG--AT-A-TC--A-T--G-G-G-G-A-AC-A-CC---AA--A--A--GC-GAA-G--G-C-A-----A--T-T-T-A---CTG--G--CG-C-A-----C-T---C-C-T--GA--CA-C-T-G--A-GA--C-A-CG-A--AA-G-C---G-TA--GG-T--AG-C-<br>G-AA-----TG--GG Bacteria(100);unclassified(100);unclassified(100);unclassified(100);unclassified(100);unclassified(100);unclassified(100);unclassified(100);unclassified(100);                    |   |   |   |   |   |   |    |    |    |   |   |   |   |   |   |    |    |   |   |    |   |   |   |   |    |   |    |
| Otu1053                                                                                                                                                                                                                                                                                                                                                                                                                                                                                                                                                                                                                                                                                                                                                                                                                                        | 0 | 0 | 0 | 0 | 0 | 0 | 0  | 0  | 0  | 0 | 0 | 0 | 0 | 0 | 0 | 0  | 0  | 0 | 0 | 0  | 0 | 0 | 0 | 0 | 0  | 0 | 0  |
|                                                                                                                                                                                                                                                                                                                                                                                                                                                                                                                                                                                                                                                                                                                                                                                                                                                | 0 | 0 | 0 | 0 | 0 | 0 | 17 | 0  | 0  | 0 | 0 | 0 | 0 | 0 | 0 | 0  | 0  | 0 | 0 | 0  | 0 | 0 | 0 | 0 | 0  | 0 |    |
|                                                                                                                                                                                                                                                                                                                                                                                                                                                                                                                                                                                                                                                                                                                                                                                                                                                | 0 | 0 | 0 | 0 | 0 | 0 | 0  | 0  | 0  | 0 | 0 | 0 | 0 | 0 | 0 | 0  | 0  | 0 | 0 | 0  | 0 | 0 | 0 | 0 | 0  | 0 |    |
|                                                                                                                                                                                                                                                                                                                                                                                                                                                                                                                                                                                                                                                                                                                                                                                                                                                | 0 | 0 | 0 | 0 | 0 | 0 | 0  | 0  | 0  | 0 | 0 | 0 | 0 | 0 | 0 | 0  | 0  | 0 | 0 | 0  | 0 | 0 | 0 | 0 | 0  | 0 |    |
| M02255_77_000000000-ADUT3_1_1110_16453_19855 C---AC--GT-AG-GGG-----GCA-A-G-----C--G--T---T--GT-C-CGG-AT-----TT-A--T-T--GG-GC-----GT--A---AA-GC-GC-TC-----G-TA-G-G-C-G-----G--C-TC-A-G-T-----<br>----AA---G-T-C-G-----G-G-T--G--TG--A-AA-TC--T-C-TG-G-G-----CT-C-AAC-----C-C-A-G-A-G-A-----A-G-CC-G---C-C-----C--GA-T-A--C-----T--G-C--TG-TG-G-C---T-A-G-A-G-T--C---C-GG----TA-G-G-----G-G-A-G--CG-T-----GG--A--ATT---<br>C-C-C-G-GT--GT-A-G-CG-GT--G---A--A---TG-C-GC-AG--AT-A-TC--G-G--G-A-G-G-A-AC-A-CC--AG--C--G--GC-GAA-G--G-C-G-----G--C-G-C-T--CTG--G--GC-C-G-----G-A---A-C-T--GA--CG-C-T-G--A-GG--A-G-CG-A--AA-G-C---G-TG--<br>GG-G--AG-C-A-AA-----CA--GG Bacteria(100);Actinobacteria(100);Actinobacteria(100);Acidimicrobidae(100);Acidimicrobiales(100);Acidimicrobineae(100);unclassified(100);unclassified(100);unclassified(100); |   |   |   |   |   |   |    |    |    |   |   |   |   |   |   |    |    |   |   |    |   |   |   |   |    |   |    |
| Otu1054                                                                                                                                                                                                                                                                                                                                                                                                                                                                                                                                                                                                                                                                                                                                                                                                                                        | 0 | 0 | 0 | 0 | 0 | 0 | 0  | 0  | 0  | 0 | 0 | 0 | 0 | 0 | 0 | 0  | 0  | 0 | 0 | 0  | 0 | 0 | 0 | 0 | 0  | 0 | 0  |
|                                                                                                                                                                                                                                                                                                                                                                                                                                                                                                                                                                                                                                                                                                                                                                                                                                                | 0 | 0 | 0 | 0 | 0 | 0 | 3  | 0  | 0  | 0 | 0 | 0 | 0 | 0 | 0 | 0  | 0  | 0 | 0 | 0  | 0 | 0 | 0 | 0 | 13 | 1 | 0  |
|                                                                                                                                                                                                                                                                                                                                                                                                                                                                                                                                                                                                                                                                                                                                                                                                                                                | 0 | 0 | 0 | 0 | 0 | 0 | 0  | 0  | 0  | 0 | 0 | 0 | 0 | 0 | 0 | 0  | 0  | 0 | 0 | 0  | 0 | 0 | 0 | 0 | 0  | 0 |    |
|                                                                                                                                                                                                                                                                                                                                                                                                                                                                                                                                                                                                                                                                                                                                                                                                                                                | 0 | 0 | 0 | 0 | 0 | 0 | 0  | 0  | 0  | 0 | 0 | 0 | 0 | 0 | 0 | 0  | 0  | 0 | 0 | 0  | 0 | 0 | 0 | 0 | 0  | 0 |    |
| M02255_77_000000000-ADUT3_1_1108_13375_16637 T---AC--GG-AG-GGT-----GCA-A-G-----C--G--T---T--AT-C-CGG-AT-----TT-A-----TT-----GG-G-----G-TA-G-G-C-T-----G--A-TT-T-G-T-----AA--<br>--G-T-C-A-----G-T-G--G--TG--A-AA-TC--T-C-AC-A-G-----CT-T-AA-----C-T-G-T-G-A-A-A-C---T-G--C-C---A-T-----T--GA-T-A--C-----T--G-C--AA--G-T-C---T-T-G-A-G-T--G---T-TG-----TT-G-A-----A-G-T-A--GC-T-----GG--A--ATA---A-G-T-A-GT--<br>GT-A-G-CG-GT--G---A--A---TG-C-AT-AG--AT-A-TT--A-C--T-T-A-G-A-AC-A-CC--AA--T--T--GC-GAA-G--G-C-A-----G--G-T-T-A---CTA--A--GC-A-A-----C-A---A-C-T--GA--CG-C-T-G--A-TG--G-A-CG-A--AA-G-C---G-TG--GG-G--AG-C-G-<br>AA-----CA--GG Bacteria(100);Bacteroidetes(100);Flavobacteria(100);Flavobacteriales(100);Flavobacteriaceae(100);Chryseobacterium(100);unclassified(100);unclassified(100);unclassified(100);                     |   |   |   |   |   |   |    |    |    |   |   |   |   |   |   |    |    |   |   |    |   |   |   |   |    |   |    |



|         |                                              |   |   |   |   |   |    |    |                                                                                                                                                                                                                                                                                                                                                                                                                                                                                                                                                                                |   |   |   |   |   |   |   |   |   |   |   |   |   |   |   |   |   |    |                                                                                                                                                                    |
|---------|----------------------------------------------|---|---|---|---|---|----|----|--------------------------------------------------------------------------------------------------------------------------------------------------------------------------------------------------------------------------------------------------------------------------------------------------------------------------------------------------------------------------------------------------------------------------------------------------------------------------------------------------------------------------------------------------------------------------------|---|---|---|---|---|---|---|---|---|---|---|---|---|---|---|---|---|----|--------------------------------------------------------------------------------------------------------------------------------------------------------------------|
| Otu1055 | 0                                            | 0 | 0 | 0 | 0 | 0 | 0  | 0  | 0                                                                                                                                                                                                                                                                                                                                                                                                                                                                                                                                                                              | 0 | 0 | 0 | 0 | 0 | 0 | 0 | 0 | 0 | 0 | 0 | 0 | 0 | 0 | 0 | 0 | 0 | 11 |                                                                                                                                                                    |
|         | 0                                            | 0 | 0 | 0 | 0 | 0 | 0  | 0  | 0                                                                                                                                                                                                                                                                                                                                                                                                                                                                                                                                                                              | 0 | 0 | 0 | 0 | 0 | 0 | 0 | 0 | 0 | 0 | 0 | 0 | 0 | 0 | 0 | 0 | 0 | 0  |                                                                                                                                                                    |
|         | 0                                            | 0 | 0 | 0 | 0 | 0 | 0  | 0  | 0                                                                                                                                                                                                                                                                                                                                                                                                                                                                                                                                                                              | 0 | 0 | 0 | 0 | 0 | 0 | 0 | 0 | 0 | 0 | 0 | 0 | 0 | 0 | 0 | 0 | 0 | 0  |                                                                                                                                                                    |
|         | 0                                            | 0 | 0 | 0 | 0 | 0 | 0  | 0  | 0                                                                                                                                                                                                                                                                                                                                                                                                                                                                                                                                                                              | 0 | 0 | 0 | 0 | 0 | 0 | 0 | 0 | 0 | 0 | 0 | 0 | 0 | 0 | 0 | 0 | 0 | 0  |                                                                                                                                                                    |
|         | M02255_77_000000000-ADUT3_1_1101_14667_11060 |   |   |   |   |   |    |    | T---AC---GG-AG-GGT-----CCA-A-G----C-G-T--T--GT-C-CGG-AA-----TC-A-C-----T-----G-G--GT-----G-TA-G-G-C-G-----G-A-TT-T-G-T-----AA---G-T-C-A-----G-A-G--G-TG--A-AA-GC--C-C-AC-G-G----CT-T-AA-----C-C-G-T-G-G-A-A-C---T-G--C-C--T-T-----T-GA-T-A--C-----T-G-C-AA-G-T-C---T-T-G-A-G-T-C--C-TG---GA-G-G-----G-G-C-T--GG-C----GG--A-ATT---C-G-T-G-GT--GT-A-G-CG-GT--G---A-A-A---TG-C-GT-AG--AT-A-TC--A-C-G-A-G-G-A-AC-A-CC--GG--A-G--GT-GTA-G--A-C-G-----G--C-C-A-G---CTG--G-AC-A-G-----G-T---A-C-T-GA--CG-C-T-G--A-GG--C-A-CG-A-AA-G-C--G-TG--GG-G--AG-C-G-AA-----CA--GG               |   |   |   |   |   |   |   |   |   |   |   |   |   |   |   |   |   |    | Bacteria(100);unclassified(100);unclassified(100);unclassified(100);unclassified(100);unclassified(100);unclassified(100);unclassified(100);unclassified(100);     |
| Otu1056 | 0                                            | 0 | 0 | 0 | 0 | 0 | 0  | 0  | 0                                                                                                                                                                                                                                                                                                                                                                                                                                                                                                                                                                              | 0 | 0 | 0 | 0 | 0 | 0 | 0 | 0 | 0 | 0 | 0 | 0 | 0 | 0 | 0 | 0 | 0 | 7  |                                                                                                                                                                    |
|         | 0                                            | 0 | 0 | 0 | 0 | 0 | 0  | 0  | 0                                                                                                                                                                                                                                                                                                                                                                                                                                                                                                                                                                              | 0 | 0 | 0 | 0 | 0 | 0 | 0 | 0 | 0 | 0 | 0 | 0 | 0 | 0 | 0 | 0 | 0 | 0  |                                                                                                                                                                    |
|         | 0                                            | 0 | 0 | 0 | 0 | 0 | 0  | 0  | 0                                                                                                                                                                                                                                                                                                                                                                                                                                                                                                                                                                              | 0 | 0 | 0 | 0 | 0 | 0 | 0 | 0 | 0 | 0 | 0 | 0 | 0 | 0 | 0 | 0 | 0 | 0  |                                                                                                                                                                    |
|         | 0                                            | 0 | 0 | 0 | 0 | 0 | 0  | 0  | 0                                                                                                                                                                                                                                                                                                                                                                                                                                                                                                                                                                              | 0 | 0 | 0 | 0 | 0 | 0 | 0 | 0 | 0 | 0 | 0 | 0 | 0 | 0 | 0 | 0 | 0 | 0  |                                                                                                                                                                    |
|         | M02255_77_000000000-ADUT3_1_1108_6276_3454   |   |   |   |   |   |    |    | T---AC---GT-AG-GGA-----GCA-A-G----C-G-T--T--GT-C-CGG-AT-----TT-A-T-T-GG-GC-----GT-A---AA-GA-GC-TC-----G-TA-G-G-C-G-----G-C-TT-A-G-C-----AA---G-T-C-A-----G-G-T-G-TG--A-AA-AC--T-C-CA-G-G----CT-C-AA-----C-C-T-G-G-A-G-A---C-G-CC-A--C-T-----T-GA-T-A--C-----T-G-C-TA-TG-G-C---T-T-G-A-G-T-T--T-GG---TA-G-G-----G-G-T-A--AG-C----GG--A-ATT---C-C-T-G-GT--GT-A-G-CG-GT--G---A-A-A---TG-C-GC-AG--AT-A-TC--A-G--G-A-G-G-A-AC-A-CC--GA--T-G--GC-GAA-G-G-C-A-----G-C-T-T-A---CTG--G-GC-C-A-----A-T---A-C-T-GA--CG-C-T-G--A-GG--A-G-CG-A-AA-G-C--G-TG--GG-G--AG-C-G-AA-----CA--GG     |   |   |   |   |   |   |   |   |   |   |   |   |   |   |   |   |   |    | Bacteria(100);Actinobacteria(100);Actinobacteria(100);unclassified(100);unclassified(100);unclassified(100);unclassified(100);unclassified(100);unclassified(100); |
| Otu1057 | 0                                            | 0 | 0 | 0 | 0 | 0 | 0  | 0  | 0                                                                                                                                                                                                                                                                                                                                                                                                                                                                                                                                                                              | 0 | 0 | 0 | 0 | 0 | 0 | 0 | 0 | 0 | 0 | 0 | 0 | 0 | 0 | 0 | 0 | 0 | 0  |                                                                                                                                                                    |
|         | 0                                            | 0 | 0 | 0 | 0 | 0 | 0  | 27 | 0                                                                                                                                                                                                                                                                                                                                                                                                                                                                                                                                                                              | 0 | 0 | 0 | 0 | 0 | 0 | 0 | 0 | 0 | 0 | 0 | 0 | 0 | 0 | 0 | 0 | 0 | 0  |                                                                                                                                                                    |
|         | 0                                            | 0 | 0 | 0 | 0 | 0 | 0  | 0  | 0                                                                                                                                                                                                                                                                                                                                                                                                                                                                                                                                                                              | 0 | 0 | 0 | 0 | 0 | 0 | 0 | 0 | 0 | 0 | 0 | 0 | 0 | 0 | 0 | 0 | 0 | 0  |                                                                                                                                                                    |
|         | 0                                            | 0 | 0 | 0 | 0 | 0 | 0  | 0  | 0                                                                                                                                                                                                                                                                                                                                                                                                                                                                                                                                                                              | 0 | 0 | 0 | 0 | 0 | 0 | 0 | 0 | 0 | 0 | 0 | 0 | 0 | 0 | 0 | 0 | 0 | 0  |                                                                                                                                                                    |
|         | M02255_77_000000000-ADUT3_1_1109_6081_8861   |   |   |   |   |   |    |    | T---AC---GT-AG-GTG-----GCA-A-G----C-G-T--T--GT-C-CGG-AA-----TT-A-T-T-GG-GC-----GT-A---AA-GC-GC-GC-----G-CA-G-G-C-G-----G--T-TC-T-T-T-----AA---G-T-T-G-----G-G-T-G-TT--A-AA-GG--C-A-GC-G-G----CT-C-AA-----C-C-G-C-T-G-T-T-----C-G--C-A--C-C-----C-AA-A-A--C-----T-G-G-GG--A-A-C---T-T-G-A-G-T-G--C-AG---GA-G-A-----G-G-A-T--AG-T-----GG--A-ATT---C-C-C-G-GT--GT-A-G-CG-GT--G---G-A-A---TG-C-GT-AG--AG-A-TC--G-G--G-A-G-G-A-AC-A-CC--AG--T-G--GC-GAA-G-G-C-G-----A--C-T-G-T--CTG--G--CC-T-G-----C-A--A-C-T-GA--CG-C-T-G--A-GG--C-G-CG-A-AA-G-C--G-TG--GG-G--AG-C-A-AA-----CA--GG |   |   |   |   |   |   |   |   |   |   |   |   |   |   |   |   |   |    | Bacteria(100);Firmicutes(100);unclassified(100);unclassified(100);unclassified(100);unclassified(100);unclassified(100);unclassified(100);unclassified(100);       |
| Otu1058 | 0                                            | 0 | 0 | 0 | 0 | 0 | 0  | 0  | 0                                                                                                                                                                                                                                                                                                                                                                                                                                                                                                                                                                              | 0 | 0 | 0 | 0 | 0 | 0 | 0 | 0 | 0 | 0 | 0 | 0 | 0 | 0 | 0 | 0 | 0 | 0  |                                                                                                                                                                    |
|         | 0                                            | 0 | 0 | 0 | 0 | 0 | 38 | 0  | 0                                                                                                                                                                                                                                                                                                                                                                                                                                                                                                                                                                              | 0 | 0 | 0 | 0 | 0 | 0 | 0 | 0 | 0 | 0 | 0 | 0 | 0 | 0 | 0 | 0 | 0 | 0  |                                                                                                                                                                    |
|         | 0                                            | 0 | 0 | 0 | 0 | 0 | 0  | 0  | 0                                                                                                                                                                                                                                                                                                                                                                                                                                                                                                                                                                              | 0 | 0 | 0 | 0 | 0 | 0 | 0 | 0 | 0 | 0 | 0 | 0 | 0 | 0 | 0 | 0 | 0 | 0  |                                                                                                                                                                    |
|         | 0                                            | 0 | 0 | 0 | 0 | 0 | 0  | 0  | 0                                                                                                                                                                                                                                                                                                                                                                                                                                                                                                                                                                              | 0 | 0 | 0 | 0 | 0 | 0 | 0 | 0 | 0 | 0 | 0 | 0 | 0 | 0 | 0 | 0 | 0 | 0  |                                                                                                                                                                    |
|         | M02255_76_000000000-ADUNE_1_1111_20928_23726 |   |   |   |   |   |    |    | T---AC---GG-AA-GGC-----CCG-A-G----C-G-T--T--AA-T-CGG-AA-----TT-A-C-T-GG-GC-----TT-A---AA-GC-GT-GC-----G-TA-G-G-C-G-----G-A-TC-G-A-A                                                                                                                                                                                                                                                                                                                                                                                                                                            |   |   |   |   |   |   |   |   |   |   |   |   |   |   |   |   |   |    |                                                                                                                                                                    |



|                                                                                                                                                                                                                          |   |   |   |    |    |   |    |   |   |   |   |   |   |   |   |   |    |   |   |   |   |   |   |   |   |   |   |
|--------------------------------------------------------------------------------------------------------------------------------------------------------------------------------------------------------------------------|---|---|---|----|----|---|----|---|---|---|---|---|---|---|---|---|----|---|---|---|---|---|---|---|---|---|---|
| Otu1060                                                                                                                                                                                                                  | 0 | 0 | 0 | 0  | 0  | 0 | 0  | 0 | 0 | 0 | 0 | 0 | 0 | 0 | 0 | 0 | 0  | 0 | 0 | 0 | 0 | 0 | 0 | 0 | 0 | 0 | 0 |
|                                                                                                                                                                                                                          | 0 | 0 | 0 | 0  | 0  | 0 | 15 | 0 | 0 | 0 | 0 | 0 | 0 | 0 | 0 | 0 | 0  | 0 | 0 | 0 | 0 | 0 | 0 | 0 | 0 | 0 | 0 |
|                                                                                                                                                                                                                          | 0 | 0 | 0 | 0  | 0  | 0 | 0  | 0 | 0 | 0 | 0 | 0 | 0 | 0 | 0 | 0 | 0  | 0 | 0 | 0 | 0 | 0 | 0 | 0 | 0 | 0 | 0 |
|                                                                                                                                                                                                                          | 0 | 0 | 0 | 0  | 0  | 0 | 0  | 0 | 0 | 0 | 0 | 0 | 0 | 0 | 0 | 0 | 0  | 0 | 0 | 0 | 0 | 0 | 0 | 0 | 0 | 0 | 0 |
| M02255_77_000000000-ADUT3_1_2108_21480_11212 C---AC---GT-AG-GGT-----CCG-A-G-----C-G-T---T-GT-C-CGG-AA-----TT-A-C-T--GG-GC-----GT-A-----AA-GC-GC-GC-----G-CA-G-G-C-G-----G-T-CC-A-T-T-----                                |   |   |   |    |    |   |    |   |   |   |   |   |   |   |   |   |    |   |   |   |   |   |   |   |   |   |   |
| -----CA---G-T-C-G-----C-T-G-G--TG--A-AA-GC--C-C-CA-C-G-----CT-C-AA-----C-G-T-G-G-G-A--A-G---G-T-C-C--G-G-----C-GA-G-A--C-----G--G-G-TG--G-A-C---T-G-G-A-G-G-C--A-GG---GA-G-A-----G-G-T-C--GG-T-----GG--A--ATT---         |   |   |   |    |    |   |    |   |   |   |   |   |   |   |   |   |    |   |   |   |   |   |   |   |   |   |   |
| -C-C-G-G-GT--GT-A-G-TG-GT--G---A--A-A---TG-C-GT-AG--AG-A-TC--C-G--G-A-G-G-A-AC-A-CC--AG--A--G--GC-GAA-G--G-C-G-----G--C-C-G-A--CTG--G--AC-C-T-----G-A---C-C-T--GA--CG-C-T-G--A-GG--C-G-CG-A--AG-G-C--G-TG--              |   |   |   |    |    |   |    |   |   |   |   |   |   |   |   |   |    |   |   |   |   |   |   |   |   |   |   |
| GG-G--AG-C-G-AA-----CG--GG Bacteria(100);unclassified(100);unclassified(100);unclassified(100);unclassified(100);unclassified(100);unclassified(100);unclassified(100);unclassified(100);                                |   |   |   |    |    |   |    |   |   |   |   |   |   |   |   |   |    |   |   |   |   |   |   |   |   |   |   |
| Otu1061                                                                                                                                                                                                                  | 0 | 0 | 0 | 0  | 0  | 0 | 0  | 0 | 0 | 0 | 0 | 0 | 0 | 0 | 0 | 0 | 0  | 0 | 0 | 0 | 0 | 0 | 0 | 0 | 0 | 0 | 2 |
|                                                                                                                                                                                                                          | 0 | 0 | 0 | 0  | 0  | 0 | 0  | 0 | 0 | 0 | 0 | 0 | 0 | 0 | 0 | 0 | 0  | 0 | 0 | 0 | 0 | 2 | 0 | 0 | 0 | 0 | 0 |
|                                                                                                                                                                                                                          | 0 | 0 | 0 | 0  | 0  | 0 | 0  | 0 | 0 | 0 | 0 | 0 | 0 | 0 | 0 | 0 | 0  | 0 | 0 | 0 | 0 | 0 | 0 | 0 | 0 | 0 | 0 |
|                                                                                                                                                                                                                          | 0 | 0 | 0 | 30 | 21 | 0 | 0  | 0 | 0 | 0 | 0 | 0 | 0 | 0 | 0 | 0 | 0  | 0 | 0 | 0 | 0 | 0 | 0 | 0 | 0 | 0 | 0 |
| M02255_76_000000000-ADUNE_1_2112_20876_15478 C---CG--GC-TA-ACT-----TCG-T-G-----C-C-A--G--CA-G-CCG-CG-----GT-A-A-T--AC-GA-----AG--G---GT-GC-AA-GC-----GTTA-A-T-C-G-----G--A-GA-G-T-T-----                                 |   |   |   |    |    |   |    |   |   |   |   |   |   |   |   |   |    |   |   |   |   |   |   |   |   |   |   |
| -----AA---G-T-C-T-----G-C-T-G--TG--A-AA-TC--C-C-CG-G-G-----CT-C-AA-----C-C-T-G-G-G-A--A-T---G-G-C-A--G-T-----G--GA-T-A--C-----T-G-G-CT--C-G-C---T-A-G-A-G-T-G---T-GT---CA-G-A-----G-G-A-T--GG-T-----GG--A--ATT---C-      |   |   |   |    |    |   |    |   |   |   |   |   |   |   |   |   |    |   |   |   |   |   |   |   |   |   |   |
| C-C-G-GT--GT-A-G-CG-GT--G---A--A-A---TG-C-GT-AG--AG-A-TC--G-G--G-A-G-G-A-AC-A-TC--AG--T--G--GC-GAA-G--G-C-G-----G--C-C-A-T--CTG--G--GA-C-A-----A-C---A-C-T--GA--CG-C-T-G--A-GG--C-A-CG-A--AA-G-C--G-TG--GG-              |   |   |   |    |    |   |    |   |   |   |   |   |   |   |   |   |    |   |   |   |   |   |   |   |   |   |   |
| G--AG-C-A-AA-----CA--GG Bacteria(100);Proteobacteria(100);Gammaproteobacteria(100);Xanthomonadales(100);Xanthomonadaceae(100);unclassified(100);unclassified(100);unclassified(100);unclassified(100);                   |   |   |   |    |    |   |    |   |   |   |   |   |   |   |   |   |    |   |   |   |   |   |   |   |   |   |   |
| Otu1062                                                                                                                                                                                                                  | 0 | 0 | 0 | 0  | 0  | 0 | 0  | 0 | 0 | 0 | 0 | 0 | 0 | 0 | 0 | 0 | 0  | 0 | 0 | 0 | 0 | 0 | 0 | 0 | 0 | 0 | 0 |
|                                                                                                                                                                                                                          | 0 | 0 | 0 | 0  | 0  | 0 | 61 | 0 | 0 | 0 | 0 | 0 | 0 | 0 | 0 | 0 | 0  | 0 | 0 | 0 | 0 | 0 | 0 | 0 | 0 | 0 | 0 |
|                                                                                                                                                                                                                          | 0 | 0 | 0 | 0  | 0  | 0 | 0  | 0 | 0 | 0 | 0 | 0 | 0 | 0 | 0 | 0 | 13 | 0 | 0 | 0 | 0 | 0 | 0 | 0 | 0 | 0 | 0 |
|                                                                                                                                                                                                                          | 0 | 0 | 0 | 0  | 0  | 0 | 0  | 0 | 0 | 0 | 0 | 0 | 0 | 0 | 0 | 0 | 0  | 0 | 0 | 0 | 0 | 0 | 0 | 0 | 0 | 0 | 0 |
| M02255_77_000000000-ADUT3_1_2107_17364_14687 G---AC---GT-AG-GAT-----CCG-A-G-----C-G-T---T-GT-C-CGG-AG-----TT-A-C-T--GG-GC-----GT-A-----AA-GC-GC-GC-----G-CA-G-G-C-G-----G--A-CA-C-G-C-----                               |   |   |   |    |    |   |    |   |   |   |   |   |   |   |   |   |    |   |   |   |   |   |   |   |   |   |   |
| -----GC---A-T-C-G-----G-C-G--G--TG--A-AA-GC--C-C-CC-C-G-----CT-C-AA-----C-G-G-G-G-G-A--G-G---G-T-C-C--G-T-----C-GA-G-A--T-----G--G-C--GT--G-T-C---T-G-G-A-G-G-C--A-GG---GA-G-A-----G-G-C-C--AG-T-----GG--A--ATT---       |   |   |   |    |    |   |    |   |   |   |   |   |   |   |   |   |    |   |   |   |   |   |   |   |   |   |   |
| -C-C-G-G-GT--GT-A-G-TG-GT--G---A--A-A---TG-C-GT-AG--AG-A-TC--C-G--G-A-G-G-A-AC-A-CC--AG--T--G--GC-GAA-G--G-C-G-----G--C-T-G-G---CTG--G--AC-C-T-----G-A---C-C-T--GA--CG-C-T-GA-G--G--C-G-CG-A--AG-G-C--G-TG--GG-          |   |   |   |    |    |   |    |   |   |   |   |   |   |   |   |   |    |   |   |   |   |   |   |   |   |   |   |
| GG-G--AG-C-G-AA-----CG--GG Bacteria(100);Chloroflexi(100);unclassified(100);unclassified(100);unclassified(100);unclassified(100);unclassified(100);unclassified(100);unclassified(100);                                 |   |   |   |    |    |   |    |   |   |   |   |   |   |   |   |   |    |   |   |   |   |   |   |   |   |   |   |
| Otu1063                                                                                                                                                                                                                  | 0 | 0 | 0 | 0  | 0  | 0 | 0  | 0 | 0 | 0 | 0 | 0 | 0 | 0 | 0 | 0 | 0  | 0 | 0 | 0 | 0 | 0 | 0 | 0 | 0 | 0 | 2 |
|                                                                                                                                                                                                                          | 0 | 0 | 0 | 0  | 0  | 0 | 0  | 0 | 0 | 0 | 0 | 0 | 0 | 0 | 0 | 0 | 0  | 0 | 0 | 0 | 0 | 0 | 0 | 0 | 0 | 0 | 0 |
|                                                                                                                                                                                                                          | 0 | 0 | 0 | 0  | 0  | 0 | 0  | 0 | 0 | 0 | 0 | 0 | 0 | 0 | 0 | 0 | 0  | 0 | 0 | 0 | 0 | 0 | 0 | 0 | 0 | 0 | 0 |
|                                                                                                                                                                                                                          | 0 | 0 | 0 | 0  | 0  | 0 | 0  | 0 | 0 | 0 | 0 | 0 | 0 | 0 | 0 | 0 | 56 | 0 | 0 | 0 | 0 | 0 | 0 | 0 | 0 | 0 | 0 |
| M02255_77_000000000-ADUT3_1_1114_22384_18854 T---AC---GA-AG-GGG-----GCT-A-G-----C-G-T---T-GT-T-CGG-AA-----TT-A-C-T--GG-GC-----GT-A-----AA-GC-GC-AC-----G-TA-G-G-C-G-----G--G-TT-G-T-T-----                               |   |   |   |    |    |   |    |   |   |   |   |   |   |   |   |   |    |   |   |   |   |   |   |   |   |   |   |
| -----AA---G-T-C-A-----G-G-G--G--TG--A-AA-TC--C-C-GG-A-G-----CT-C-AA-----C-T-C-C-G-G-A--A-C---T-G--C-C---T--T-----T-GA-T-A--C-----T-G-G-CA--A-T-C---T-A-G-A-G-A--C---T-GG---AA-G-A-----G-G-T-T---AG-T-----GG--A--ATT---C- |   |   |   |    |    |   |    |   |   |   |   |   |   |   |   |   |    |   |   |   |   |   |   |   |   |   |   |
| C-C-A-GT--GT-A-G-AG-GT--G---A--A-A---TT-C-GT-AG--AT-A-TT--G-G--G-A-G-A-AC-A-CC--AG--T--G--GC-GAA-G--G-C-G-----G--C-T-A-A---CTG--G--TC-C-A-----G-T---A-C-T--GA--CG-C-T-G--A-GG--T-G-CG-A--AA-G-C--G-TG--GG-               |   |   |   |    |    |   |    |   |   |   |   |   |   |   |   |   |    |   |   |   |   |   |   |   |   |   |   |
| G--AG-C-A-AA-----CA--GG Bacteria(100);Proteobacteria(100);Alphaproteobacteria(100);Rhizobiales(100);unclassified(100);unclassified(100);unclassified(100);unclassified(100);unclassified(100);                           |   |   |   |    |    |   |    |   |   |   |   |   |   |   |   |   |    |   |   |   |   |   |   |   |   |   |   |
| Otu1064                                                                                                                                                                                                                  | 0 | 0 | 0 | 0  | 0  | 0 | 0  | 0 | 0 | 0 | 0 | 0 | 0 | 0 | 0 | 0 | 0  | 0 | 0 | 0 | 0 | 0 | 0 | 0 | 0 | 0 | 0 |
|                                                                                                                                                                                                                          | 0 | 0 | 0 | 0  | 0  | 0 | 29 | 0 | 0 | 0 | 0 | 0 | 0 | 0 | 0 | 0 | 0  | 0 | 0 | 0 | 0 | 0 | 0 | 0 | 0 | 0 | 0 |
|                                                                                                                                                                                                                          | 0 | 0 | 0 | 0  | 0  | 0 | 0  | 0 | 0 | 0 | 0 | 0 | 0 | 0 | 0 | 0 | 0  | 0 | 0 | 0 | 0 | 0 | 0 | 0 | 0 | 0 | 0 |
|                                                                                                                                                                                                                          | 0 | 0 | 0 | 0  | 0  | 0 | 0  | 0 | 0 | 0 | 0 | 0 | 0 | 0 | 0 | 0 | 0  | 0 | 0 | 0 | 0 | 0 | 0 | 0 | 0 | 0 | 0 |
| M02255_77_000000000-ADUT3_1_2104_11116_14423 T---AC---GA-AG-GGG-----GCT-A-G-----C-G-T---T-GT-T-CGG-AT-----TT-A-C-T--GG-GC-----GT-A-----AA-GC-GC-GT-----G-TA-G-G-C-G-----G--G-TC-G-T-T-----                               |   |   |   |    |    |   |    |   |   |   |   |   |   |   |   |   |    |   |   |   |   |   |   |   |   |   |   |
| -----AA---G-T-T-G-----G-G-G--G--TG--A-AA-TC--C-C-GA-G-G-----CT-C-AA-----C-C-T-C-G-G-A--A-C---T-G--C-C---T--T-----C-AA-A-A--C-----T-G-G-CG--A-C-C---T-G-G-A-C-T--C---A-AG---CA-G-A-----G-G-C-A--AG-T-----GG--A--ATT---    |   |   |   |    |    |   |    |   |   |   |   |   |   |   |   |   |    |   |   |   |   |   |   |   |   |   |   |
| G-C-G-A-GT--GT-A-G-AG-GT--G---A--A-A---TT-C-GT-AG--AT-A-TT--C-G--C-A-G-G-A-AC-A-CC--AG--T--G--GC-GAA-G--G-C-G-----A--C-T-T-G---CTG--G--GC-T-T-----G-T---A-G-T--GA--CG-C-T-G--A-GA--C-G-CG-A--AA-G-C--G-TG--GG-           |   |   |   |    |    |   |    |   |   |   |   |   |   |   |   |   |    |   |   |   |   |   |   |   |   |   |   |
| G--AG-C-A-AA-----CA--GG Bacteria(100);Proteobacteria(100);Alphaproteobacteria(100);unclassified(100);unclassified(100);unclassified(100);unclassified(100);unclassified(100);unclassified(100);                          |   |   |   |    |    |   |    |   |   |   |   |   |   |   |   |   |    |   |   |   |   |   |   |   |   |   |   |



|         |                                                                                                                                                                                                                                                                                                                                                                                                                                                                                                                                                                                                                                                                                                                                                                                                                                |   |   |   |   |   |    |   |   |   |   |   |   |   |   |   |   |   |   |   |   |   |   |   |   |   |    |  |
|---------|--------------------------------------------------------------------------------------------------------------------------------------------------------------------------------------------------------------------------------------------------------------------------------------------------------------------------------------------------------------------------------------------------------------------------------------------------------------------------------------------------------------------------------------------------------------------------------------------------------------------------------------------------------------------------------------------------------------------------------------------------------------------------------------------------------------------------------|---|---|---|---|---|----|---|---|---|---|---|---|---|---|---|---|---|---|---|---|---|---|---|---|---|----|--|
| Otu1065 | 0                                                                                                                                                                                                                                                                                                                                                                                                                                                                                                                                                                                                                                                                                                                                                                                                                              | 0 | 0 | 0 | 0 | 0 | 0  | 0 | 0 | 0 | 0 | 0 | 0 | 0 | 0 | 0 | 0 | 0 | 0 | 0 | 0 | 0 | 0 | 0 | 0 | 0 | 13 |  |
|         | 0                                                                                                                                                                                                                                                                                                                                                                                                                                                                                                                                                                                                                                                                                                                                                                                                                              | 0 | 0 | 0 | 0 | 0 | 0  | 0 | 0 | 0 | 0 | 0 | 0 | 0 | 0 | 0 | 0 | 0 | 0 | 0 | 0 | 0 | 0 | 0 | 0 | 0 | 0  |  |
|         | 0                                                                                                                                                                                                                                                                                                                                                                                                                                                                                                                                                                                                                                                                                                                                                                                                                              | 0 | 0 | 0 | 0 | 0 | 0  | 0 | 0 | 0 | 0 | 0 | 0 | 0 | 0 | 0 | 0 | 0 | 0 | 0 | 0 | 0 | 0 | 0 | 0 | 0 | 0  |  |
|         | 0                                                                                                                                                                                                                                                                                                                                                                                                                                                                                                                                                                                                                                                                                                                                                                                                                              | 0 | 0 | 0 | 0 | 0 | 0  | 0 | 0 | 0 | 0 | 0 | 0 | 0 | 0 | 0 | 0 | 0 | 0 | 0 | 0 | 0 | 0 | 0 | 0 |   |    |  |
|         | M02255_77_000000000-ADUT3_1_2106_18670_10312 T---AC---AG-AG-GTG-----CCG-A-G-----C-G-T---T-AG-G-CGG-AA-----TC-A-C-T--GG-GC-----TT-A-----AA-GC-GT-GT-----G-TA-G-G-C-G-----G--A-GG-C-C-T-----AA---G-T-A-C-----C-T-T--G--TG--A-AA-TC--C-C-AC-A-G----CT-C-AA-----C-T-G-T-G-G-A--A-C---T-G--C-T---T-G-----G--TA-T-A--C-----T-G-G--GT--C-T-C---T-T-G-A-G-C-C---A-CT-----TA-G-G-----G-G-C-A---AT-C-----GG--A--ACA---A-A-C-G-GT--GG-A-G-CG-GT--G---A--A-A---TG-C-GT-AG--AT-A-TC--G-T--T-T-G-G-A-AC-G-CC---AA--T-G--GT-GAA-A--A-C--A-----G--A-T-T-G---CTG--G--GA-G-T-----G-T---G-C-T--GA--CG-C-T-G--A-GA--C-A-CG-A--AA-G-C---C-AG--GG-G--AG-C-G-AA-----CG--GG Bacteria(100);Planctomycetes(100);Phycisphaerae(100);WD2101(100);unclassified(100);unclassified(100);unclassified(100);unclassified(100);unclassified(100);                |   |   |   |   |   |    |   |   |   |   |   |   |   |   |   |   |   |   |   |   |   |   |   |   |   |    |  |
| Otu1066 | 0                                                                                                                                                                                                                                                                                                                                                                                                                                                                                                                                                                                                                                                                                                                                                                                                                              | 0 | 0 | 0 | 0 | 0 | 0  | 0 | 0 | 0 | 0 | 0 | 0 | 0 | 0 | 0 | 0 | 0 | 0 | 0 | 0 | 0 | 0 | 0 | 0 | 0 | 0  |  |
|         | 0                                                                                                                                                                                                                                                                                                                                                                                                                                                                                                                                                                                                                                                                                                                                                                                                                              | 0 | 0 | 0 | 0 | 0 | 27 | 0 | 0 | 0 | 0 | 0 | 0 | 0 | 0 | 0 | 0 | 0 | 0 | 0 | 0 | 0 | 0 | 0 | 0 | 0 | 0  |  |
|         | 0                                                                                                                                                                                                                                                                                                                                                                                                                                                                                                                                                                                                                                                                                                                                                                                                                              | 0 | 0 | 0 | 0 | 0 | 0  | 0 | 0 | 0 | 0 | 0 | 0 | 0 | 0 | 0 | 0 | 0 | 0 | 0 | 0 | 0 | 0 | 0 | 0 | 0 | 0  |  |
|         | 0                                                                                                                                                                                                                                                                                                                                                                                                                                                                                                                                                                                                                                                                                                                                                                                                                              | 0 | 0 | 0 | 0 | 0 | 0  | 0 | 0 | 0 | 0 | 0 | 0 | 0 | 0 | 0 | 0 | 0 | 0 | 0 | 0 | 0 | 0 | 0 | 0 | 0 | 0  |  |
|         | M02255_77_000000000-ADUT3_1_1119_14708_19047 A---AC---GT-AG-GAG-----GCA-A-G-----C-G-T---T-AT-C-CGG-AT-----TC-A-C-T--GG-GC-----GT--A-----AA-GC-GC-GT-----G-CA-G-G-C-G-----G--T-GC-G-G-T-----AA---G-T-T-G-----G-G-T--G--TG--A-AA-TC--T-C-CC-G-G----CT-C-AA-----C-T-G-G-G-A-G--A-G---G-T-C-A---T-T-----C-AA-T-A--C-----T-A-C--CG--T-A-C---T-T-G-A-G-A--G---C-AG-----AA-G-A-----G-G-A-A---GA-T-----GG--A--ATT---C-C-C-G-GT--GT-A-G-TG-GT--G---A--A-A---TG-C-GT-AG--AT-A-TC--G-G--G-A-G-G-A-AC-A-CC---AG--T--G--GC-GAA-G--G-C-G-----A--T-C-T-T---CTG--G--TC-T-G-----T-T---T-C-T--GA--CG-C-T-C--A-GA--C-G-CG-A--CA-G-C---T-AG--GG-T--AG-T-A-AA-----CG--GG Bacteria(100);Chloroflexi(100);Anaerolineae(100);Anaerolineales(100);Anaerolineaceae(100);uncultured(100);unclassified(100);unclassified(100);unclassified(100);           |   |   |   |   |   |    |   |   |   |   |   |   |   |   |   |   |   |   |   |   |   |   |   |   |   |    |  |
| Otu1067 | 0                                                                                                                                                                                                                                                                                                                                                                                                                                                                                                                                                                                                                                                                                                                                                                                                                              | 0 | 0 | 0 | 0 | 0 | 0  | 0 | 0 | 0 | 0 | 0 | 0 | 0 | 0 | 0 | 0 | 0 | 0 | 0 | 0 | 0 | 0 | 0 | 0 | 0 | 9  |  |
|         | 0                                                                                                                                                                                                                                                                                                                                                                                                                                                                                                                                                                                                                                                                                                                                                                                                                              | 0 | 0 | 0 | 0 | 0 | 0  | 0 | 0 | 0 | 0 | 0 | 0 | 0 | 0 | 0 | 0 | 0 | 0 | 0 | 0 | 0 | 0 | 0 | 0 | 0 | 0  |  |
|         | 0                                                                                                                                                                                                                                                                                                                                                                                                                                                                                                                                                                                                                                                                                                                                                                                                                              | 0 | 0 | 0 | 0 | 0 | 0  | 0 | 0 | 0 | 0 | 0 | 0 | 0 | 0 | 0 | 0 | 0 | 0 | 0 | 0 | 0 | 0 | 0 | 0 | 0 | 0  |  |
|         | 0                                                                                                                                                                                                                                                                                                                                                                                                                                                                                                                                                                                                                                                                                                                                                                                                                              | 0 | 0 | 0 | 0 | 0 | 0  | 0 | 0 | 0 | 0 | 0 | 0 | 0 | 0 | 0 | 0 | 0 | 0 | 0 | 0 | 0 | 0 | 0 | 0 | 0 | 0  |  |
|         | M02255_77_000000000-ADUT3_1_1110_6818_14666 T---AC---GA-AG-GGA-----GCT-A-G-----C-G-T---T-GT-T-CGG-AA-----TT-A-C-T--GG-GC-----GT--A-----AA-GG-GC-GC-----G-TA-G-G-CGG-----C-CT-T-G-T-----AA---G-T-C-A-----G-A-T--G--TG--A-AA-GC--C-C-CG-G-G----CT-T-AA-----C-C-T-G-G-G-A-A-C---T-G--C-A---T-T-----T--GA-T-A--C-----T-G-C-AA-G-G-C---T-A-G-A-G-A--T---C-GA-----GA-G-A-----G-G-A-A---AG-T-----GG--A--ATTA---C-G-A-GT--GT-A-G-AA-GT--G---A--A-A---TT-C-GT-AG--AT-A-TT--C-G--T-A-G-G-A-AC-A-CC---AG--T--G--GC-GAA-G--G-C-G-----A--C-T-T-T---CTG--G--CT-C-G-----A-T---A-C-T--GA--CG-C-T-A--A-AG--C-G-CG-A--AA-G-C---G-TG--GG-G--AG-C-A-AA-----CA--GG Bacteria(100);Proteobacteria(100);Alphaproteobacteria(100);Rickettsiales(100);Candidatus_Odyssella(100);unclassified(100);unclassified(100);unclassified(100);unclassified(100); |   |   |   |   |   |    |   |   |   |   |   |   |   |   |   |   |   |   |   |   |   |   |   |   |   |    |  |
| Otu1068 | 0                                                                                                                                                                                                                                                                                                                                                                                                                                                                                                                                                                                                                                                                                                                                                                                                                              | 0 | 0 | 0 | 0 | 0 | 0  | 0 | 0 | 0 | 0 | 0 | 0 | 0 | 0 | 0 | 0 | 0 | 0 | 0 | 0 | 0 | 0 | 0 | 0 | 0 | 0  |  |
|         | 0                                                                                                                                                                                                                                                                                                                                                                                                                                                                                                                                                                                                                                                                                                                                                                                                                              | 0 | 0 | 0 | 0 | 0 | 28 | 0 | 0 | 0 | 0 | 0 | 0 | 0 | 0 | 0 | 0 | 0 | 0 | 0 | 0 | 0 | 0 | 0 | 0 | 0 | 0  |  |
|         | 0                                                                                                                                                                                                                                                                                                                                                                                                                                                                                                                                                                                                                                                                                                                                                                                                                              | 0 | 0 | 0 | 0 | 0 | 0  | 0 | 0 | 0 | 0 | 0 | 0 | 0 | 0 | 0 | 0 | 0 | 0 | 0 | 0 | 0 | 0 | 0 | 0 | 0 | 0  |  |
|         | 0                                                                                                                                                                                                                                                                                                                                                                                                                                                                                                                                                                                                                                                                                                                                                                                                                              | 0 | 0 | 0 | 0 | 0 | 0  | 0 | 0 | 0 | 0 | 0 | 0 | 0 | 0 | 0 | 0 | 0 | 0 | 0 | 0 | 0 | 0 | 0 | 0 | 0 | 0  |  |
|         | M02255_77_000000000-ADUT3_1_1117_17029_8980 T---AC---GT-AG-GTG-----GCA-A-G-----C-G-T---T-GT-C-CGG-AT-----TT-A-C-T--GG-GC-----GT--A-----AA-GG-GC-GT-----G-CA-G-G-C-G-----G--T-TT-G-T-C-----TA---G-T-C-T-----A-G-G--G--TG--A-AA-GC--C-C-CC-G-G----CT-T-AA-----C-T-G-G-G-G-G--A-G---G-T--C-C---T-T-----G--GA-T-A--C-----T-G-G--CA--A-A-C---T-T-G-A-G-G--G---A-GG-----CA-G-A-----G-G-A-A---AG-T-----GG--A--ATT---C-C-C-G-GT--GT-A-G-TG-GT--G---A--T-A---TG-C-GT-AG--AT-A-TC--G-G--G-A-G-G-A-AC-A-CC---AG--T--G--GC-GAA-G--G-C-G-----G--C-T-T-T---CTG--G--GC-C-T-----T-A---C-C-T--GA--CG-C-T-G--A-GA--C-G-CG-A--AA-G-C---G-TG--GG-G--AG-C-G-AA-----CC--GG Bacteria(100);unclassified(100);unclassified(100);unclassified(100);unclassified(100);unclassified(100);unclassified(100);unclassified(100);unclassified(100);            |   |   |   |   |   |    |   |   |   |   |   |   |   |   |   |   |   |   |   |   |   |   |   |   |   |    |  |
| Otu1069 | 0                                                                                                                                                                                                                                                                                                                                                                                                                                                                                                                                                                                                                                                                                                                                                                                                                              | 0 | 0 | 0 | 0 | 0 | 0  | 0 | 0 | 0 | 0 | 0 | 0 | 0 | 0 | 0 | 0 | 0 | 0 | 0 | 0 | 0 | 0 | 0 | 0 | 1 | 0  |  |
|         | 0                                                                                                                                                                                                                                                                                                                                                                                                                                                                                                                                                                                                                                                                                                                                                                                                                              | 0 | 0 | 0 | 0 | 0 | 0  | 0 | 0 | 0 | 0 | 0 | 0 | 0 | 0 | 0 | 1 | 0 | 0 | 0 | 0 | 0 | 0 | 0 | 0 | 0 | 0  |  |
|         | 0                                                                                                                                                                                                                                                                                                                                                                                                                                                                                                                                                                                                                                                                                                                                                                                                                              | 0 | 0 | 0 | 0 | 0 | 0  | 0 | 0 | 0 | 0 | 0 | 0 | 0 | 0 | 0 | 0 | 0 | 0 | 0 | 0 | 0 | 0 | 0 | 0 | 0 | 0  |  |
|         | 0                                                                                                                                                                                                                                                                                                                                                                                                                                                                                                                                                                                                                                                                                                                                                                                                                              | 0 | 0 | 0 | 0 | 0 | 0  | 0 | 0 | 0 | 0 | 0 | 0 | 0 | 0 | 0 | 0 | 0 | 0 | 0 | 0 | 0 | 0 | 0 | 0 |   |    |  |
|         | M02255_76_000000000-ADUNE_1_2119_28522_18282 A---AA---GC-CC-CGG-----CTA-A-C-----T--A--C---G--TG-C-CAG-CA-----GC-C--G-C--GG-TA-----AT--A-----CG-TA-GG-TG-----G-CA-A-G-C-G-----T--T-GTCC-G-G-----AA---G-T-C-T-----G-A-T--G--TG--A-AA-GC--C-C-CC-G-G----CT-C-AA-----C-C-G-G-G-G-A-G-----G-GG-C-A---T-T-----G--GA-A-A--C-----T-G-G--GA--G-A-C---T-T-G-A-G-G--A---C-AG-----AA-G-A-----G-G-A-G---AG-T-----GG--A--ATT---C-C-A-A-GT--GT-A-G-CG-GT--G---A--A-A---TG-C-GT-AG--AT-A-TT--T-G--G-A-G-G-A-AC-A-CC---AG--T--G--GC-GAA-G--G-C-G-----G--C-T-C-T---CTG--G--TC-T-G-----T-T---A-C-T--GA--CG-C-T-G--A-GG--C-G-CG-A--AA-G-C---G-TG--GG-G--AG-C-GG-G--AG-C-A-AA-----CA--GG Bacteria(100);Firmicutes(100);Bacilli(100);Bacillales(100);unclassified(100);unclassified(100);unclassified(100);unclassified(100);unclassified(100);      |   |   |   |   |   |    |   |   |   |   |   |   |   |   |   |   |   |   |   |   |   |   |   |   |   |    |  |



|         |                                              |   |    |   |   |   |   |   |   |    |                                                                                                                                                                                                                                                                                                                                                                                                                                                                                                                                                                                                  |   |   |   |    |   |   |   |   |   |   |   |   |   |   |                                                                                                                                                                                    |   |  |  |  |  |  |  |  |  |  |  |  |  |  |
|---------|----------------------------------------------|---|----|---|---|---|---|---|---|----|--------------------------------------------------------------------------------------------------------------------------------------------------------------------------------------------------------------------------------------------------------------------------------------------------------------------------------------------------------------------------------------------------------------------------------------------------------------------------------------------------------------------------------------------------------------------------------------------------|---|---|---|----|---|---|---|---|---|---|---|---|---|---|------------------------------------------------------------------------------------------------------------------------------------------------------------------------------------|---|--|--|--|--|--|--|--|--|--|--|--|--|--|
| Otu1070 | 0                                            | 0 | 0  | 0 | 0 | 0 | 0 | 0 | 0 | 0  | 0                                                                                                                                                                                                                                                                                                                                                                                                                                                                                                                                                                                                | 0 | 0 | 0 | 0  | 0 | 0 | 0 | 0 | 0 | 0 | 0 | 0 | 0 | 0 | 0                                                                                                                                                                                  | 0 |  |  |  |  |  |  |  |  |  |  |  |  |  |
|         | 0                                            | 0 | 0  | 0 | 0 | 0 | 0 | 0 | 0 | 51 | 75                                                                                                                                                                                                                                                                                                                                                                                                                                                                                                                                                                                               | 0 | 0 | 0 | 0  | 0 | 0 | 0 | 0 | 0 | 0 | 0 | 0 | 0 | 0 | 0                                                                                                                                                                                  | 0 |  |  |  |  |  |  |  |  |  |  |  |  |  |
|         | 0                                            | 0 | 0  | 0 | 0 | 0 | 0 | 0 | 0 | 0  | 0                                                                                                                                                                                                                                                                                                                                                                                                                                                                                                                                                                                                | 0 | 0 | 0 | 0  | 0 | 0 | 0 | 0 | 0 | 0 | 0 | 0 | 0 | 0 | 0                                                                                                                                                                                  | 0 |  |  |  |  |  |  |  |  |  |  |  |  |  |
|         | 0                                            | 0 | 0  | 0 | 0 | 0 | 0 | 0 | 0 | 0  | 0                                                                                                                                                                                                                                                                                                                                                                                                                                                                                                                                                                                                | 0 | 0 | 0 | 0  | 0 | 0 | 0 | 0 | 0 | 0 | 0 | 0 | 0 | 0 | 0                                                                                                                                                                                  | 0 |  |  |  |  |  |  |  |  |  |  |  |  |  |
|         | M02255_76_000000000-ADUNE_1_1104_15368_21290 |   |    |   |   |   |   |   |   |    | T---AC---GG-AG-GGT-----GCA-A-G-----C-G-T---T-AC-C-CGG-AT-----TT-A--C-T-GG-GT-----GT--A---AA-GG-GC-GT-----G-TA-G-G-C-G-----G--T-CT-C-T-C-----AA---G-T-C-C-----G-A-T--G--CT--A-AA-GA--C-C-AA-G-G----CT-C-AA-----C-C-T-C-G-G-G--A-G---T-G--C-G---T-T-----G--GA-T-A--C-----T-G-T--GA--G-G-C---T-A-G-A-C-G--G---T-CG----GA-G-A-----G-G-G-T--AG-C-----GG--A--ATT---T-C-C-G-GA--GT-A-G-CG-GT--G---A--A-A--TG-C-GC-AG--AT-A-CC--G-G--A-A-G-G-A-AC-G-CC--AA-T--A--GC-GAA-A-G-C-A-----G--C-T-A-C---CTG--G--AC-G-A-----T-T---T-G-T--GA--CG-C-T-G--A-GG--C-G-CG-A--AA-G-C---G-TG--GG-G--AG-C-A-AA-----CC--GG |   |   |   |    |   |   |   |   |   |   |   |   |   |   | Bacteria(100);Deinococcus-Thermus(100);Thermales(100);Thermaceae(100);Meiothermus(100);unclassified(100);unclassified(100);unclassified(100);unclassified(100);                    |   |  |  |  |  |  |  |  |  |  |  |  |  |  |
| Otu1071 | 0                                            | 0 | 0  | 0 | 0 | 0 | 0 | 0 | 0 | 0  | 0                                                                                                                                                                                                                                                                                                                                                                                                                                                                                                                                                                                                | 0 | 0 | 0 | 0  | 0 | 0 | 0 | 0 | 0 | 0 | 0 | 0 | 0 | 8 | 0                                                                                                                                                                                  | 0 |  |  |  |  |  |  |  |  |  |  |  |  |  |
|         | 0                                            | 0 | 0  | 0 | 0 | 0 | 0 | 0 | 0 | 0  | 0                                                                                                                                                                                                                                                                                                                                                                                                                                                                                                                                                                                                | 0 | 0 | 0 | 0  | 0 | 0 | 0 | 0 | 0 | 0 | 0 | 0 | 0 | 0 | 0                                                                                                                                                                                  | 0 |  |  |  |  |  |  |  |  |  |  |  |  |  |
|         | 0                                            | 0 | 0  | 0 | 0 | 0 | 0 | 0 | 0 | 0  | 0                                                                                                                                                                                                                                                                                                                                                                                                                                                                                                                                                                                                | 0 | 0 | 0 | 0  | 0 | 0 | 0 | 0 | 0 | 0 | 0 | 0 | 0 | 0 | 0                                                                                                                                                                                  | 0 |  |  |  |  |  |  |  |  |  |  |  |  |  |
|         | 0                                            | 0 | 0  | 0 | 0 | 0 | 0 | 0 | 0 | 0  | 0                                                                                                                                                                                                                                                                                                                                                                                                                                                                                                                                                                                                | 0 | 0 | 0 | 0  | 0 | 0 | 0 | 0 | 0 | 0 | 0 | 0 | 0 | 0 | 0                                                                                                                                                                                  | 0 |  |  |  |  |  |  |  |  |  |  |  |  |  |
|         | M02255_77_000000000-ADUT3_1_1103_13736_12274 |   |    |   |   |   |   |   |   |    | T---AC---GA-AG-GGG-----GCT-A-G-----C-G-T---T-GT-T-CGG-AT-----TT-A--C-T-GG-GC-----GT--A---AA-GC-GC-GC-----G-TA-G-G-C-G-----G--A-TA-A-A-T-----TA---G-T-T-A-----G-A-G--G--TG--A-AA-TC--C-C-AG-G-G----CT-C-AA-----C-C-C-T-G-G-A--A-C---T-G--C-C---T-T-----T-AA-T-A--C-----T-G-T--TT--A-T-C---T-A-G-A-G-T--A--T-GA---AA-G-A-----G-G-T-G--AG-T-----GG--A--ATT---C-C-G-A-GT--GT-A-G-AG-GT--G---A--A-A--TT-C-GT-AG--AT-A-TT--C-G--G-A-G-G-A-AC-A-TC--AG--T--G--GC-GAA-G-G-C-G-----G--C-T-C-A---CTG--G--TT-C-A-----T-T--A-C-T--GA--CG-C-T-G--A-GG--T-G-CG-A--AA-G-C---G-TG--GG-G--AG-C-A-AA-----CA--GG    |   |   |   |    |   |   |   |   |   |   |   |   |   |   | Bacteria(100);Proteobacteria(100);Alphaproteobacteria(100);unclassified(100);unclassified(100);unclassified(100);unclassified(100);unclassified(100);unclassified(100);            |   |  |  |  |  |  |  |  |  |  |  |  |  |  |
| Otu1072 | 0                                            | 0 | 0  | 0 | 0 | 0 | 0 | 0 | 0 | 0  | 0                                                                                                                                                                                                                                                                                                                                                                                                                                                                                                                                                                                                | 0 | 0 | 0 | 0  | 0 | 0 | 0 | 0 | 0 | 0 | 0 | 0 | 0 | 2 | 1                                                                                                                                                                                  | 0 |  |  |  |  |  |  |  |  |  |  |  |  |  |
|         | 0                                            | 0 | 0  | 0 | 0 | 0 | 0 | 0 | 0 | 0  | 0                                                                                                                                                                                                                                                                                                                                                                                                                                                                                                                                                                                                | 0 | 0 | 0 | 0  | 0 | 0 | 0 | 0 | 0 | 0 | 0 | 0 | 0 | 0 | 0                                                                                                                                                                                  | 0 |  |  |  |  |  |  |  |  |  |  |  |  |  |
|         | 0                                            | 0 | 0  | 0 | 0 | 0 | 0 | 0 | 0 | 0  | 0                                                                                                                                                                                                                                                                                                                                                                                                                                                                                                                                                                                                | 0 | 0 | 0 | 0  | 0 | 0 | 0 | 0 | 0 | 0 | 0 | 0 | 0 | 0 | 0                                                                                                                                                                                  | 0 |  |  |  |  |  |  |  |  |  |  |  |  |  |
|         | 0                                            | 0 | 0  | 0 | 0 | 0 | 0 | 0 | 0 | 0  | 0                                                                                                                                                                                                                                                                                                                                                                                                                                                                                                                                                                                                | 0 | 0 | 0 | 0  | 0 | 0 | 0 | 0 | 0 | 0 | 0 | 0 | 0 | 0 | 0                                                                                                                                                                                  | 0 |  |  |  |  |  |  |  |  |  |  |  |  |  |
|         | M02255_76_000000000-ADUNE_1_2114_26021_18835 |   |    |   |   |   |   |   |   |    | T---GG---CT-AA-CTA-----CGT-T-C-----C--A--G--C--AG-C-CGC-GG-----TA-A--T-A--CG-TA-----G--A---TG-GC-AA-GC-----G-TT-GTC-C-G-----G--A-TC-T-T-T-----AA---G-T-C-T-----G-A-T--G--TG--A-AA-GA--C-C-CC-A-G----CT-C-AA-----C-T-G-G-G-G-A--A---G-GT-C-A--T-T-----G--GA-A-A--C-----T-G-G--AG--A-A-C---T-T-G-A-G-T--G--C-AG---AA-G-A-----G-G-A-G--AG-T-----GG--A--ATT---C-C-A-T-GT--GT-A-G-CG-GT--G---A--A-A--TG-C-GT-AG--AT-A-TA--T-G--G-A-G-G-A-AC-A-CC--AG--T--G--GC-GAA-G-G-C-G-----A--C-T-C-T---CTG--G--TC-T-G-----T-A--A-C-T--GA--CG-C-T-G--A-GG--C-T-CG-A--AA-G-C---G-TG--GG-G--AG-C-A-AA-----CA--GG    |   |   |   |    |   |   |   |   |   |   |   |   |   |   | Bacteria(100);Firmicutes(100);Bacilli(100);Lactobacillales(100);Carnobacteriaceae(100);unclassified(100);unclassified(100);unclassified(100);unclassified(100);                    |   |  |  |  |  |  |  |  |  |  |  |  |  |  |
| Otu1073 | 0                                            | 0 | 0  | 0 | 0 | 0 | 0 | 0 | 0 | 0  | 0                                                                                                                                                                                                                                                                                                                                                                                                                                                                                                                                                                                                | 0 | 0 | 0 | 0  | 0 | 0 | 0 | 0 | 0 | 0 | 0 | 0 | 0 | 2 | 0                                                                                                                                                                                  | 0 |  |  |  |  |  |  |  |  |  |  |  |  |  |
|         | 0                                            | 0 | 0  | 0 | 0 | 0 | 0 | 0 | 0 | 0  | 0                                                                                                                                                                                                                                                                                                                                                                                                                                                                                                                                                                                                | 0 | 0 | 0 | 0  | 0 | 0 | 0 | 0 | 0 | 0 | 0 | 0 | 0 | 0 | 0                                                                                                                                                                                  | 0 |  |  |  |  |  |  |  |  |  |  |  |  |  |
|         | 0                                            | 0 | 0  | 0 | 0 | 0 | 0 | 0 | 0 | 0  | 0                                                                                                                                                                                                                                                                                                                                                                                                                                                                                                                                                                                                | 0 | 0 | 0 | 0  | 0 | 0 | 0 | 0 | 0 | 0 | 0 | 0 | 0 | 0 | 0                                                                                                                                                                                  | 0 |  |  |  |  |  |  |  |  |  |  |  |  |  |
|         | 0                                            | 0 | 0  | 0 | 0 | 0 | 0 | 0 | 0 | 0  | 0                                                                                                                                                                                                                                                                                                                                                                                                                                                                                                                                                                                                | 0 | 0 | 0 | 9  | 0 | 0 | 0 | 0 | 0 | 0 | 0 | 0 | 0 | 0 | 0                                                                                                                                                                                  | 0 |  |  |  |  |  |  |  |  |  |  |  |  |  |
|         | M02255_77_000000000-ADUT3_1_1106_17027_16655 |   |    |   |   |   |   |   |   |    | T---AC---GT-AG-GGG-----GCA-A-G-----C-G-T---T-AT-C-CGG-AT-----TC-A--T-T-GG-GC-----GT--A---AA-GC-GC-GC-----G-TA-G-G-C-G-----G--T-CT-G-T-T-----AG---G-T-C-A-----G-G-A-G--TT--A-AA-TC--T-G-GG-G-G----CT-C-AA-----C-C-C-C-T-A-T-C-----C-G--C-T---C-C-----T-GA-T-A--C-----C-G-G--CA--G-G-C---T-T-G-A-G-T--C---T-GG---TA-G-G-----G-G-A-A--GA-T-----GG--A--ATT---C-C-A-A-GT--GT-A-G-CG-GT--G---A--A-A--TG-C-GC-AG--AG-A-TG--T-G--G-A-A-G-A-AT-A-CC--GA--T--G--GC-GAA-G-G-C-A-----G--T-C-T-T---CTG--G--GC-C-A-----T-G--A-C-T--GA--CG-C-T-G--A-GG--C-G-CG-A--AA-G-C---T-AG--GG-G--AG-C-G-AA-----CA--GG     |   |   |   |    |   |   |   |   |   |   |   |   |   |   | Bacteria(100);Actinobacteria(100);Actinobacteria(100);Coriobacteridae(100);Coriobacteriales(100);Coriobacterineae(100);Coriobacteriaceae(100);unclassified(100);unclassified(100); |   |  |  |  |  |  |  |  |  |  |  |  |  |  |
| Otu1074 | 0                                            | 0 | 0  | 0 | 0 | 0 | 0 | 0 | 0 | 0  | 0                                                                                                                                                                                                                                                                                                                                                                                                                                                                                                                                                                                                | 0 | 0 | 0 | 0  | 0 | 0 | 0 | 0 | 0 | 0 | 0 | 0 | 0 | 0 | 0                                                                                                                                                                                  | 0 |  |  |  |  |  |  |  |  |  |  |  |  |  |
|         | 0                                            | 0 | 0  | 0 | 0 | 0 | 0 | 0 | 1 | 0  | 0                                                                                                                                                                                                                                                                                                                                                                                                                                                                                                                                                                                                | 0 | 0 | 0 | 25 | 2 | 8 | 0 | 0 | 0 | 0 | 0 | 0 | 0 | 0 | 1                                                                                                                                                                                  | 0 |  |  |  |  |  |  |  |  |  |  |  |  |  |
|         | 0                                            | 9 | 0  | 0 | 0 | 0 | 0 | 0 | 0 | 0  | 0                                                                                                                                                                                                                                                                                                                                                                                                                                                                                                                                                                                                | 0 | 0 | 0 | 0  | 0 | 0 | 0 | 0 | 0 | 0 | 8 | 0 | 0 | 0 | 8                                                                                                                                                                                  | 2 |  |  |  |  |  |  |  |  |  |  |  |  |  |
|         | 0                                            | 6 | 10 | 0 | 0 | 0 | 0 | 0 | 3 | 0  | 0                                                                                                                                                                                                                                                                                                                                                                                                                                                                                                                                                                                                | 0 | 0 | 0 | 0  | 0 | 0 | 0 | 0 | 0 | 0 | 0 | 0 | 0 | 0 | 0                                                                                                                                                                                  | 0 |  |  |  |  |  |  |  |  |  |  |  |  |  |
|         | M02255_77_000000000-ADUT3_1_1113_19220_17537 |   |    |   |   |   |   |   |   |    | C---GG---CT-A--ACT-----ACG-T-G-----C--C--A--G--CA-G-CCG-CG-----GT-A--A-T-AC-GT-----AG--G---GT-GC-GA-GC-----GTTA-A-T-C-G-----GA-T-TA-T-T-T-----AA---G-C-C-A-----G-A-T--G--TG--A-AA-TA--C-C-CG-A-G----CC-T-AA-----C-T-T-G-G-G-A--G-G---T-G--C-A--T-A-----T-GG-A-A--C-----T-G-G--GT--A-G-C---T-A-G-A-G-T--G---T-GT---CA-G-A-----G-G-G-A--GG-T-----AG--A--ACT---C-C-A-C-GT--GT-A-G-CA-GT--G---A--A-A--TG-C-GT-AG--AG-A-TG--T-G--G-A-A-G-A-AT-A-CC--GA--T--G--GC-GAA-G-G-C-A-----G--C-C-T-C---CTG--G--GA-T-A-----A-C--A-C-T--GA--CG-T-T-G--A-GG--C-T-CG-A--AA-G-C---G-TG--GG-G--AG-C-A-AA-----CA--GG  |   |   |   |    |   |   |   |   |   |   |   |   |   |   | Bacteria(100);Proteobacteria(100);Betaproteobacteria(100);unclassified(100);unclassified(100);unclassified(100);unclassified(100);unclassified(100);unclassified(100);             |   |  |  |  |  |  |  |  |  |  |  |  |  |  |



|                                                                                                                                                                                                                        |   |   |   |    |   |   |   |   |   |   |   |   |   |   |   |   |   |   |   |   |   |   |   |   |   |    |   |   |
|------------------------------------------------------------------------------------------------------------------------------------------------------------------------------------------------------------------------|---|---|---|----|---|---|---|---|---|---|---|---|---|---|---|---|---|---|---|---|---|---|---|---|---|----|---|---|
| Otu1075                                                                                                                                                                                                                | 0 | 0 | 0 | 0  | 0 | 0 | 0 | 0 | 0 | 0 | 0 | 0 | 0 | 0 | 0 | 0 | 0 | 0 | 0 | 0 | 0 | 0 | 0 | 0 | 0 | 4  | 0 | 0 |
|                                                                                                                                                                                                                        | 0 | 0 | 0 | 0  | 0 | 0 | 0 | 0 | 0 | 0 | 0 | 0 | 0 | 0 | 0 | 0 | 0 | 0 | 0 | 0 | 0 | 0 | 0 | 0 | 0 | 0  | 0 | 0 |
|                                                                                                                                                                                                                        | 0 | 0 | 0 | 0  | 0 | 0 | 0 | 0 | 0 | 0 | 0 | 0 | 0 | 0 | 0 | 0 | 0 | 0 | 0 | 0 | 0 | 0 | 0 | 0 | 0 | 0  | 0 | 0 |
|                                                                                                                                                                                                                        | 0 | 0 | 0 | 61 | 0 | 0 | 0 | 0 | 0 | 0 | 0 | 0 | 0 | 0 | 0 | 0 | 0 | 0 | 0 | 0 | 0 | 0 | 0 | 0 | 0 | 0  |   |   |
| M02255_77_000000000-ADUT3_1_1111_17220_10208 T---AC---GA-AG-GGG-----GCT-A-G-----C-G-T---T-GT-T-CGG-AT-----TT-A-C-T--GG-GC-----GT-A-----AA-GC-GC-AC-----G-TA-G-G-C-G-----G--A-AA-T-T-T-----                             |   |   |   |    |   |   |   |   |   |   |   |   |   |   |   |   |   |   |   |   |   |   |   |   |   |    |   |   |
| -----AA---G-T-C-A-----G-G-G--G--TG--A-AA-TC--C-C-GA-G-G----CT-C-AA-----C-C-T-C-G-G-A-A-C---T-G-C-C---T-T-----T-GA-T-A--C-----T-G-G-GT--T-T-C---T-T-G-A-G-T-C---C-GG----AA-G-A-----G-G-T-G---AG-T-----GG--A--ACT---G-   |   |   |   |    |   |   |   |   |   |   |   |   |   |   |   |   |   |   |   |   |   |   |   |   |   |    |   |   |
| C-G-A-GT--GT-A-G-AG-GT--G---A--A-A---TT-C-GT-AG--AT-A-TT--C-G--C-A-A-G-A-AC-A-CC---AG--T--G--GC-GAA-G--G-C-G-----G--C-T-C-A---CTG--G--TC-C-G-----G-A---A-C-T--GA--CG-C-T-G--A-GG--T-G-CG-A--AA-G-C---G-TG--GG-         |   |   |   |    |   |   |   |   |   |   |   |   |   |   |   |   |   |   |   |   |   |   |   |   |   |    |   |   |
| G--AG-C-A-AA-----CA--GG Bacteria(100);Proteobacteria(100);Alphaproteobacteria(100);Rhizobiales(100);unclassified(100);unclassified(100);unclassified(100);unclassified(100);unclassified(100);                         |   |   |   |    |   |   |   |   |   |   |   |   |   |   |   |   |   |   |   |   |   |   |   |   |   |    |   |   |
| Otu1076                                                                                                                                                                                                                | 0 | 0 | 0 | 0  | 0 | 0 | 0 | 0 | 0 | 0 | 0 | 0 | 0 | 0 | 0 | 0 | 0 | 0 | 0 | 0 | 0 | 0 | 0 | 0 | 0 | 6  | 0 |   |
|                                                                                                                                                                                                                        | 0 | 0 | 0 | 0  | 0 | 0 | 0 | 0 | 0 | 0 | 0 | 0 | 0 | 0 | 0 | 0 | 0 | 0 | 0 | 0 | 0 | 0 | 0 | 4 | 0 | 0  | 0 |   |
|                                                                                                                                                                                                                        | 0 | 0 | 0 | 0  | 0 | 0 | 0 | 0 | 0 | 0 | 0 | 0 | 0 | 0 | 0 | 0 | 0 | 0 | 0 | 0 | 0 | 0 | 0 | 0 | 0 | 0  | 0 |   |
|                                                                                                                                                                                                                        | 0 | 0 | 0 | 0  | 0 | 0 | 0 | 0 | 0 | 0 | 0 | 0 | 0 | 0 | 0 | 0 | 0 | 0 | 0 | 0 | 0 | 0 | 0 | 0 | 0 | 0  | 0 |   |
| M02255_77_000000000-ADUT3_1_1101_9280_11182 T---AC---GT-AG-GAT-----GCA-A-G-----C-G-T---T-GT-C-CGG-AA-----TT-A--T-T--GG-GC-----GT-A-----AA-GC-GA-AC-----G-TA-G-G-C-G-----G--T-TA-C-T-T-----AA--                         |   |   |   |    |   |   |   |   |   |   |   |   |   |   |   |   |   |   |   |   |   |   |   |   |   |    |   |   |
| --G-T-T-T-----G-G-T-C--TT--A-AA-GA--C-C-GG-G-G----CT-C-AA-----C-T-C-C-G-G-G-A-----A-TG-G-A--C--T-----G-AA-T-A--C-----T-G-G-GT--G-A-C---T-A-G-A-G-G-A--T-GT----CA-G-A-----G-G-A-A--AG-T-----GG--A--ATT---C-C-A-A-       |   |   |   |    |   |   |   |   |   |   |   |   |   |   |   |   |   |   |   |   |   |   |   |   |   |    |   |   |
| GT--GT-A-G-CG-GT--G---A--A-A---TG-C-GT-AG--AT-A-TT--T-G--G-A-G-G-A-AC-A-CC---AG--T--G--GC-GAA-A-G-C-G-----G--C-T-T-T--CTG--G--GA-C-A-----T-T---C-C-T--GA--CG-C-T-G--A-GG--T-T-CG-A--AA-G-C---T-CG--GG-G--AG-C-         |   |   |   |    |   |   |   |   |   |   |   |   |   |   |   |   |   |   |   |   |   |   |   |   |   |    |   |   |
| A-AA-----CA--GG Bacteria(100);unclassified(100);unclassified(100);unclassified(100);unclassified(100);unclassified(100);unclassified(100);unclassified(100);unclassified(100);                                         |   |   |   |    |   |   |   |   |   |   |   |   |   |   |   |   |   |   |   |   |   |   |   |   |   |    |   |   |
| Otu1077                                                                                                                                                                                                                | 0 | 0 | 0 | 0  | 0 | 0 | 0 | 0 | 0 | 0 | 0 | 0 | 0 | 0 | 0 | 0 | 0 | 0 | 0 | 0 | 0 | 0 | 0 | 0 | 0 | 4  | 0 |   |
|                                                                                                                                                                                                                        | 0 | 0 | 0 | 0  | 0 | 0 | 0 | 0 | 0 | 0 | 0 | 0 | 0 | 0 | 0 | 0 | 0 | 0 | 0 | 0 | 0 | 0 | 0 | 0 | 0 | 0  | 0 |   |
|                                                                                                                                                                                                                        | 0 | 0 | 0 | 0  | 0 | 0 | 0 | 0 | 0 | 0 | 0 | 0 | 0 | 0 | 0 | 0 | 0 | 0 | 0 | 0 | 0 | 0 | 0 | 0 | 0 | 0  | 0 |   |
|                                                                                                                                                                                                                        | 0 | 0 | 0 | 0  | 0 | 0 | 0 | 0 | 0 | 0 | 0 | 0 | 0 | 0 | 0 | 0 | 0 | 0 | 0 | 0 | 0 | 0 | 0 | 0 | 0 | 0  | 0 |   |
| M02255_77_000000000-ADUT3_1_1105_28471_10798 G---AC---GA-GG-GAC-----CCT-A-G-----C-G-T---T-GT-T-CGG-AA-----TC-A--T-T--GG-GC-----GT-A-----AA-GC-GG-AG-----G-TA-G-G-T-G-----G--C-TT-G-G-T----                             |   |   |   |    |   |   |   |   |   |   |   |   |   |   |   |   |   |   |   |   |   |   |   |   |   |    |   |   |
| -----AA---G-T-C-G-----A-G-T--G--TG--A-AA-GC--C-C-AG-G-G----CT-C-AA-----C-C-C-T-G-G-A-A-G---T-G--C-A--T--T-----C-GA-A-A--C-----T-G-C--TG--A-G-C---T-T-G-A-G-T--G---C-TA---GA-G-A-----G-G-T-T--AC-T-----AG--A--ATG---    |   |   |   |    |   |   |   |   |   |   |   |   |   |   |   |   |   |   |   |   |   |   |   |   |   |    |   |   |
| C-C-T-G-GT--GT-A-G-TG-GT--G---A--A-A---TA-C-GT-AG--AT-A-TC--A-G--G-C-G-G-A-AT-A-CC---GG--A--G--GC-GAA-G--G-C-G-----G--G-T-A-A---CTG--G--CT-A-G-----A-C---A-C-T--GA--CA-C-T-C--A-AT--T-C-CG-A--AA-G-C---G-TG--GG-       |   |   |   |    |   |   |   |   |   |   |   |   |   |   |   |   |   |   |   |   |   |   |   |   |   |    |   |   |
| G--AT-C-A-AA-----CA--GG Bacteria(100);Proteobacteria(100);Deltaproteobacteria(100);Bdellovibrionales(100);Bdellovibrionaceae(100);Bdellovibrio(100);unclassified(100);unclassified(100);unclassified(100);             |   |   |   |    |   |   |   |   |   |   |   |   |   |   |   |   |   |   |   |   |   |   |   |   |   |    |   |   |
| Otu1078                                                                                                                                                                                                                | 0 | 0 | 0 | 0  | 0 | 0 | 0 | 0 | 0 | 0 | 0 | 0 | 0 | 0 | 0 | 0 | 0 | 0 | 0 | 0 | 0 | 0 | 0 | 0 | 0 | 25 | 0 |   |
|                                                                                                                                                                                                                        | 3 | 0 | 0 | 0  | 0 | 0 | 0 | 0 | 0 | 0 | 0 | 0 | 0 | 0 | 0 | 0 | 0 | 0 | 0 | 0 | 0 | 0 | 0 | 0 | 0 | 0  | 0 |   |
|                                                                                                                                                                                                                        | 0 | 0 | 0 | 0  | 0 | 0 | 0 | 0 | 0 | 0 | 0 | 0 | 0 | 0 | 0 | 0 | 0 | 0 | 0 | 0 | 0 | 0 | 0 | 0 | 0 | 0  | 0 |   |
|                                                                                                                                                                                                                        | 0 | 0 | 0 | 32 | 0 | 0 | 0 | 0 | 0 | 0 | 0 | 0 | 0 | 0 | 0 | 0 | 0 | 0 | 0 | 0 | 0 | 0 | 0 | 0 | 0 | 0  | 0 |   |
| M02255_77_000000000-ADUT3_1_1110_16451_24536 T---AC---GG-AG-GGG-----GCT-A-G-----C-G-T---T-GT-T-CGG-AA-----TT-A-C-T--GG-GC-----GT-A-----AA-GC-GC-AC-----G-TA-G-G-C-T-----G--C-TT-T-G-T-----                             |   |   |   |    |   |   |   |   |   |   |   |   |   |   |   |   |   |   |   |   |   |   |   |   |   |    |   |   |
| -----AA---G-T-C-A-----G-A-G--G--TG--A-AA-GC--C-C-GG-G-G----CT-C-AA-----C-C-C-C-G-G-A--T-G---T-G--C-C---T-T-----T-GA-G-A--C-----T-G-C--AG--A-G-C---T-A-G-A-A-T--C---G-CG----GA-G-A-----G-G-T-G---AG-T-----GG--A--ATT--- |   |   |   |    |   |   |   |   |   |   |   |   |   |   |   |   |   |   |   |   |   |   |   |   |   |    |   |   |
| C-C-G-A-GT--GT-A-G-AG-GT--G---A--A-A---TT-C-GT-AG--AT-A-TT--C-G--G-A-A-G-A-AC-A-CC---AG--T--G--GC-GAA-G--G-C-G-----G--C-T-C-A---CTG--G--AC-G-C-----G-T---A-T-T--GA--CG-C-T-G--A-GG--T-G-CG-A--AA-G-C---G-TG--GG-       |   |   |   |    |   |   |   |   |   |   |   |   |   |   |   |   |   |   |   |   |   |   |   |   |   |    |   |   |
| G--AG-C-A-AA-----CA--GG Bacteria(100);Proteobacteria(100);Alphaproteobacteria(100);Sphingomonadales(100);unclassified(100);unclassified(100);unclassified(100);unclassified(100);unclassified(100);                    |   |   |   |    |   |   |   |   |   |   |   |   |   |   |   |   |   |   |   |   |   |   |   |   |   |    |   |   |
| Otu1079                                                                                                                                                                                                                | 0 | 0 | 0 | 0  | 0 | 0 | 0 | 0 | 0 | 0 | 0 | 0 | 0 | 0 | 0 | 0 | 0 | 0 | 0 | 0 | 0 | 0 | 0 | 0 | 0 | 0  | 0 |   |
|                                                                                                                                                                                                                        | 0 | 0 | 0 | 0  | 0 | 0 | 0 | 0 | 0 | 0 | 0 | 0 | 0 | 0 | 0 | 0 | 0 | 0 | 0 | 0 | 0 | 0 | 0 | 0 | 0 | 24 | 0 |   |
|                                                                                                                                                                                                                        | 0 | 0 | 0 | 0  | 0 | 0 | 0 | 0 | 0 | 0 | 0 | 0 | 0 | 0 | 0 | 0 | 0 | 0 | 0 | 0 | 0 | 0 | 0 | 0 | 0 | 0  | 0 |   |
|                                                                                                                                                                                                                        | 0 | 0 | 0 | 0  | 0 | 0 | 0 | 0 | 0 | 0 | 0 | 0 | 0 | 0 | 0 | 0 | 0 | 0 | 0 | 0 | 0 | 0 | 0 | 0 | 0 | 0  | 0 |   |
| M02255_77_000000000-ADUT3_1_1114_9658_17890 T---AC---GA-AG-GGG-----GCT-A-G-----C--G--T---T-GC-T-CGG-AA-----TT-A-C-T--GG-GC-----GT-A-----AA-GG-GA-GC-----G-TA-G-G-C-G-----G--G-TC-G-T-C-----                            |   |   |   |    |   |   |   |   |   |   |   |   |   |   |   |   |   |   |   |   |   |   |   |   |   |    |   |   |
| AA---G-T-T-G-----G-G-G--G--TG--A-AA-GC--C-C-AG-G-G----CT-C-AA-----C-C-C-T-G-G-A-A-C---T-G--C-C---T-T-----C-AA-A-A--C-----T-G-G--CG--A-C-C---T-A-G-A-G-T-A--T-GG----TA-G-A-----G-G-T-G---TG-T-----GG--A--ACT---C-C-G-   |   |   |   |    |   |   |   |   |   |   |   |   |   |   |   |   |   |   |   |   |   |   |   |   |   |    |   |   |
| A-GT--GT-A-G-AG-GT--G---A--A-A---TT-C-GT-AG--AT-A-TT--C-G--G-A-A-G-A-AC-A-CC---AG--T--G--GC-GAA-G--G-C-G-----A--C-A-C-A---CTG--G--GC-C-A-----T-T---A-C-T--GA--CG-C-T-G--A-GG--C-T-CG-A--AA-G-C---G-TG--GG-G--AG-       |   |   |   |    |   |   |   |   |   |   |   |   |   |   |   |   |   |   |   |   |   |   |   |   |   |    |   |   |
| C-A-AA-----CA--GG Bacteria(100);Proteobacteria(100);Alphaproteobacteria(100);Caulobacterales(100);Caulobacteraceae(100);unclassified(100);unclassified(100);unclassified(100);unclassified(100);                       |   |   |   |    |   |   |   |   |   |   |   |   |   |   |   |   |   |   |   |   |   |   |   |   |   |    |   |   |



|         |                                                                                                                                                                                                                  |   |   |   |   |   |   |   |    |   |                                                                                                                                                  |   |   |   |   |   |   |   |   |   |   |   |   |   |   |    |   |   |
|---------|------------------------------------------------------------------------------------------------------------------------------------------------------------------------------------------------------------------|---|---|---|---|---|---|---|----|---|--------------------------------------------------------------------------------------------------------------------------------------------------|---|---|---|---|---|---|---|---|---|---|---|---|---|---|----|---|---|
| Otu1080 | 0                                                                                                                                                                                                                | 0 | 0 | 0 | 0 | 0 | 0 | 0 | 0  | 0 | 0                                                                                                                                                | 0 | 0 | 0 | 0 | 0 | 0 | 0 | 0 | 0 | 0 | 0 | 0 | 0 | 0 | 0  | 4 | 0 |
|         | 0                                                                                                                                                                                                                | 0 | 0 | 0 | 0 | 0 | 0 | 0 | 0  | 0 | 0                                                                                                                                                | 0 | 0 | 0 | 0 | 0 | 0 | 0 | 0 | 0 | 0 | 0 | 0 | 0 | 0 | 0  | 0 | 0 |
|         | 0                                                                                                                                                                                                                | 0 | 0 | 0 | 0 | 0 | 0 | 0 | 0  | 0 | 0                                                                                                                                                | 0 | 0 | 0 | 0 | 0 | 0 | 0 | 0 | 0 | 0 | 0 | 0 | 0 | 0 | 0  | 0 | 0 |
|         | 0                                                                                                                                                                                                                | 0 | 0 | 0 | 0 | 0 | 0 | 0 | 0  | 0 | 0                                                                                                                                                | 0 | 0 | 0 | 0 | 0 | 0 | 0 | 0 | 0 | 0 | 0 | 0 | 0 | 0 | 0  | 0 | 0 |
|         | M02255_76_000000000-ADUNE_1_2119_12805_17690                                                                                                                                                                     |   |   |   |   |   |   |   |    |   | G---AC---GA-AC-CGT-----GCG-A-A---C-G--T--T--AT-T-CGG-AA-----TC-A-C-T-GG-GC-----TT-A---AA---G-G-----G-TA-----G-A-T-----AA-                        |   |   |   |   |   |   |   |   |   |   |   |   |   |   |    |   |   |
|         | ---G-T-C-G-----A-G-G--G--TG--A-AA-GC--C-T-CT-A-G---CT-T-AA-----C-T-A-G-A-G-A-A-G---T-G--C-C---C-T-----C-GA-A-A---C-----T-A-T-TT-G-T-C---T-T-G-A-G-A-G--A-GA---TA-G-G-----G-G-C-A--TA-C---GG-A--ACT---T-C-C-G-    |   |   |   |   |   |   |   |    |   |                                                                                                                                                  |   |   |   |   |   |   |   |   |   |   |   |   |   |   |    |   |   |
|         | GT--GG-A-G-CG-GT--G---A-A-A---TG-C-GT-AG--AG-A-TC--G-G--A-A-G-G-A-AC-G-CC---GG--T-G--GC-GAA-A-G-C-G-----G-T-A-T-G---CTG--G--AT-C-T-----T-T--T-C-T-GA--CG-C-T-G--A-GG--C-G-CG-A-AA-G-C---T-AG--GG-G--AG-          |   |   |   |   |   |   |   |    |   |                                                                                                                                                  |   |   |   |   |   |   |   |   |   |   |   |   |   |   |    |   |   |
|         | C-G-AA-----CG--GG    Bacteria(100);Planctomycetes(100);Planctomycetacia(100);Planctomycetales(100);Planctomycetaceae(100);uncultured(100);unclassified(100);unclassified(100);unclassified(100);                 |   |   |   |   |   |   |   |    |   |                                                                                                                                                  |   |   |   |   |   |   |   |   |   |   |   |   |   |   |    |   |   |
| Otu1081 | 0                                                                                                                                                                                                                | 0 | 0 | 0 | 0 | 0 | 0 | 0 | 0  | 0 | 0                                                                                                                                                | 0 | 0 | 0 | 0 | 0 | 0 | 0 | 0 | 0 | 0 | 0 | 0 | 0 | 0 | 0  | 0 | 0 |
|         | 0                                                                                                                                                                                                                | 0 | 0 | 0 | 0 | 0 | 0 | 0 | 0  | 0 | 25                                                                                                                                               | 0 | 0 | 0 | 0 | 0 | 0 | 0 | 0 | 0 | 0 | 0 | 0 | 0 | 0 | 0  | 0 | 0 |
|         | 0                                                                                                                                                                                                                | 0 | 0 | 0 | 0 | 0 | 0 | 0 | 0  | 0 | 0                                                                                                                                                | 0 | 0 | 0 | 0 | 0 | 0 | 0 | 0 | 0 | 0 | 0 | 0 | 0 | 0 | 0  | 0 | 0 |
|         | 0                                                                                                                                                                                                                | 0 | 0 | 0 | 0 | 0 | 0 | 0 | 0  | 0 | 0                                                                                                                                                | 0 | 0 | 0 | 0 | 0 | 0 | 0 | 0 | 0 | 0 | 0 | 0 | 0 | 0 | 0  | 0 | 0 |
|         | M02255_77_000000000-ADUT3_1_1107_10442_12377                                                                                                                                                                     |   |   |   |   |   |   |   |    |   | G---AC---GG-GG-GGT-----CCA-A-G---C-G--T--T--GT-T-CGG-AA-----TC-A--T-T--GG-GC-----GT--A---AA-GC-GG-GC-----G-TA-G-G-T-G-----G--C-CT-T-G-C---       |   |   |   |   |   |   |   |   |   |   |   |   |   |   |    |   |   |
|         | -----AA---G-T-C-A-----G-G-A--G--TG--A-AA-GC--C-C-TG-G-G---CT-C-AA-----C-C-C-A-G-G-A-A-G---T-G--C-T--T-T-----T-GA-A-A---C-----T-G-C-AA-G-G-C---T-T-G-A-A-T--G--T-GG---GA-G-A-----G-G-G-T--AG-T---AG--A--ATT---    |   |   |   |   |   |   |   |    |   |                                                                                                                                                  |   |   |   |   |   |   |   |   |   |   |   |   |   |   |    |   |   |
|         | C-C-T-G-GT--GT-A-G-TG-GT--G---A-A-A---TA-C-GT-AG--AT-A-TC--A-G--G-A-G-G-A-AT-A-CC---GG--T-G--GC-GAA-G-G-C-G-----G-C-T-A-C---CTG--G--CC-C-A-----A-C--A-T-T-GA--CA-C-T-G--A-GG--C-C-CA-A-AA-G-C---G-TG--GG-        |   |   |   |   |   |   |   |    |   |                                                                                                                                                  |   |   |   |   |   |   |   |   |   |   |   |   |   |   |    |   |   |
|         | G--AT-C-A-AA-----CA--GG    Bacteria(100);unclassified(100);unclassified(100);unclassified(100);unclassified(100);unclassified(100);unclassified(100);unclassified(100);unclassified(100);                        |   |   |   |   |   |   |   |    |   |                                                                                                                                                  |   |   |   |   |   |   |   |   |   |   |   |   |   |   |    |   |   |
| Otu1082 | 0                                                                                                                                                                                                                | 0 | 0 | 0 | 0 | 0 | 0 | 0 | 0  | 0 | 0                                                                                                                                                | 0 | 0 | 0 | 0 | 0 | 0 | 0 | 0 | 0 | 0 | 0 | 0 | 0 | 0 | 0  | 6 | 1 |
|         | 0                                                                                                                                                                                                                | 0 | 0 | 0 | 0 | 0 | 0 | 0 | 0  | 0 | 0                                                                                                                                                | 0 | 0 | 0 | 0 | 0 | 0 | 0 | 0 | 0 | 0 | 0 | 0 | 0 | 0 | 0  | 0 | 0 |
|         | 0                                                                                                                                                                                                                | 0 | 0 | 0 | 0 | 0 | 0 | 0 | 0  | 0 | 0                                                                                                                                                | 0 | 0 | 0 | 0 | 0 | 0 | 0 | 0 | 0 | 0 | 0 | 0 | 0 | 0 | 0  | 0 | 0 |
|         | 0                                                                                                                                                                                                                | 0 | 0 | 0 | 0 | 0 | 0 | 0 | 0  | 0 | 0                                                                                                                                                | 0 | 0 | 0 | 0 | 0 | 0 | 0 | 0 | 0 | 0 | 0 | 0 | 0 | 0 | 0  | 0 | 0 |
|         | M02255_76_000000000-ADUNE_1_1115_25054_20841                                                                                                                                                                     |   |   |   |   |   |   |   |    |   | G---AA---TA-AG-CAC-----CGG-C-T-----A-A-C---T--CT-G-TGC-CA-----GC-A--G-C-CG-CG-----GT--A---AT-AC-AG-AG-----G-GT-G-C-G-A-----G--C-TT-G-T-T-----    |   |   |   |   |   |   |   |   |   |   |   |   |   |   |    |   |   |
|         | -----AA---G-T-C-G-----G-A-T--G--TG--A-AA-GC--C-C-TG-A-G---CT-T-AA-----C-T-T-A-G-G-A-A-T---T-G--C-A--T-T-----C-GA-T-A---C-----T-G-G--TA-A-G-C---T-A-G-A-G-T-A--T-GG---GA-G-A-----G-G-A-A--GG-T---AG--A--ATT---C-  |   |   |   |   |   |   |   |    |   |                                                                                                                                                  |   |   |   |   |   |   |   |   |   |   |   |   |   |   |    |   |   |
|         | C-A-G-GT--GT-A-G-CG-GT--G---A-A-A---TG-C-GT-AG--AT-A-TC--T-G--G-A-G-G-A-AT-A-CC---GA--T--G--GC-GAA-G-G-C-A-----G--C-C-T-T--CTG--G--CC-T-A-----A-T--A-C-T-GA--CG-C-T-G--A-GG--T-G-CG-A-AA-G-C---A-TG--GG-G-       |   |   |   |   |   |   |   |    |   |                                                                                                                                                  |   |   |   |   |   |   |   |   |   |   |   |   |   |   |    |   |   |
|         | -AG-C-A-AA-----CA--GG    Bacteria(100);Proteobacteria(100);Gammaproteobacteria(100);unclassified(100);unclassified(100);unclassified(100);unclassified(100);unclassified(100);unclassified(100);                 |   |   |   |   |   |   |   |    |   |                                                                                                                                                  |   |   |   |   |   |   |   |   |   |   |   |   |   |   |    |   |   |
| Otu1083 | 0                                                                                                                                                                                                                | 0 | 0 | 0 | 0 | 0 | 0 | 0 | 0  | 0 | 0                                                                                                                                                | 0 | 0 | 0 | 0 | 0 | 0 | 0 | 0 | 0 | 0 | 0 | 0 | 0 | 0 | 0  | 0 | 0 |
|         | 0                                                                                                                                                                                                                | 0 | 0 | 0 | 0 | 0 | 0 | 0 | 15 | 2 | 0                                                                                                                                                | 0 | 0 | 0 | 0 | 0 | 0 | 0 | 0 | 0 | 0 | 0 | 0 | 0 | 0 | 0  | 0 | 0 |
|         | 0                                                                                                                                                                                                                | 0 | 0 | 0 | 0 | 0 | 0 | 0 | 0  | 0 | 0                                                                                                                                                | 0 | 0 | 0 | 0 | 0 | 0 | 0 | 0 | 0 | 0 | 0 | 0 | 0 | 0 | 0  | 0 | 0 |
|         | 0                                                                                                                                                                                                                | 0 | 0 | 0 | 0 | 0 | 0 | 0 | 0  | 0 | 0                                                                                                                                                | 0 | 0 | 0 | 0 | 0 | 0 | 0 | 0 | 0 | 0 | 0 | 0 | 0 | 0 | 0  | 0 | 0 |
|         | M02255_77_000000000-ADUT3_1_2102_9746_9272                                                                                                                                                                       |   |   |   |   |   |   |   |    |   | T---AC---GG-AG-GAT-----CCA-A-G---C-G--T--T--AT-C-CGG-AA-----TT-A-C-T-T-GG-GC-----GT--A---AA-GA-GTTGC-----G-TA-G-G-T-G-----G--C-AT-A-G-T-----AT-  |   |   |   |   |   |   |   |   |   |   |   |   |   |   |    |   |   |
|         | ---G-T-C-G-----G-T-A--G--TG--A-AA-GC--G-T-GT-G-G---CT-C-AA-----C-C-A-T-A-T-A-C-A---C-A--T-T--A-T-----C-GA-A-A---C-----T-G-C--TA-A-G-C---T-A-G-A-G-G-A--C-GA---GA-G-A-----G-G-T-T--AT-T---GG--A--ATT---C-C-C-A-   |   |   |   |   |   |   |   |    |   |                                                                                                                                                  |   |   |   |   |   |   |   |   |   |   |   |   |   |   |    |   |   |
|         | GT--GT-A-G-GA-GT--G---A-A-A---TC-C-GT-AG--AT-A-TT--G-G--G-A-G-G-A-AC-A-CC---GA--T--G--GC-GTA-G-G-C-A-----G-A-T-A-A---CTG--G--CT-C-G-----T-T---C-C-T-GA--CA-C-T-A-A-GG--C-A-CG-A-AA-G-C---G-TG--GG-G--AG-C-       |   |   |   |   |   |   |   |    |   |                                                                                                                                                  |   |   |   |   |   |   |   |   |   |   |   |   |   |   |    |   |   |
|         | A-AA-----CG--GG    Bacteria(100);Candidate_division_TM7(100);unclassified(100);unclassified(100);unclassified(100);unclassified(100);unclassified(100);unclassified(100);unclassified(100);                      |   |   |   |   |   |   |   |    |   |                                                                                                                                                  |   |   |   |   |   |   |   |   |   |   |   |   |   |   |    |   |   |
| Otu1084 | 0                                                                                                                                                                                                                | 0 | 0 | 0 | 0 | 0 | 0 | 0 | 0  | 0 | 0                                                                                                                                                | 0 | 0 | 0 | 0 | 0 | 0 | 0 | 0 | 0 | 0 | 0 | 0 | 0 | 0 | 0  | 0 | 0 |
|         | 0                                                                                                                                                                                                                | 0 | 0 | 0 | 0 | 0 | 0 | 0 | 2  | 0 | 0                                                                                                                                                | 0 | 0 | 0 | 0 | 0 | 0 | 0 | 0 | 0 | 0 | 0 | 0 | 0 | 0 | 0  | 0 | 0 |
|         | 0                                                                                                                                                                                                                | 0 | 0 | 0 | 0 | 0 | 0 | 0 | 0  | 0 | 0                                                                                                                                                | 0 | 0 | 0 | 0 | 0 | 0 | 0 | 0 | 0 | 0 | 0 | 0 | 0 | 0 | 10 | 0 | 0 |
|         | 1                                                                                                                                                                                                                | 0 | 4 | 0 | 1 | 0 | 0 | 0 | 0  | 0 | 0                                                                                                                                                | 0 | 0 | 0 | 1 | 0 | 0 | 0 | 0 | 0 | 0 | 0 | 0 | 0 | 0 | 0  | 0 | 0 |
|         | M02255_77_000000000-ADUT3_1_1101_7129_20279                                                                                                                                                                      |   |   |   |   |   |   |   |    |   | T---AA---GC-AC-CGG-----CTA-A-C-----T--A--C---G--TG-C-CAG-CA-----GC-C--G-C--GG-TA-----AT--A---CG-TA-GG-GT-----G-CA-A-G-C-G-----T--TAAT-C-G-G----- |   |   |   |   |   |   |   |   |   |   |   |   |   |   |    |   |   |
|         | AAT---T-A-C-T-----G-A-G--G--TG--A-AA-TC--C-C-CG-G-G---CT-C-AA-----C-C-T-G-G-G-A-A-C---T-G--C-C---T-T-----T--GT-G-A---C-----T-G-C--AA-G-G-C---T-G-G-A-G-T-G---C-GG---CA-G-A-----G-G-G-G--GA-T---GG--A--ATT---C-C- |   |   |   |   |   |   |   |    |   |                                                                                                                                                  |   |   |   |   |   |   |   |   |   |   |   |   |   |   |    |   |   |
|         | G-C-GT--GT-A-G-CA-GT--G---A-A-A---TG-C-GT-AG--AT-A-TG--C-G--G-A-G-G-A-AC-A-CC---GA--T--G--GC-GAA-G-G-C-A-----A-T-C-C-C---CTG--G--GC-C-T-----G-C---A-C-T-GA--CG-C-T-C--A-TG--C-A-CG-A-AA-G-C---G-TG--GG-G--       |   |   |   |   |   |   |   |    |   |                                                                                                                                                  |   |   |   |   |   |   |   |   |   |   |   |   |   |   |    |   |   |
|         | AG-C-A-AA-----CA--GG    Bacteria(100);Proteobacteria(100);Betaproteobacteria(100);Burkholderiales(100);Comamonadaceae(100);unclassified(100);unclassified(100);unclassified(100);unclassified(100);              |   |   |   |   |   |   |   |    |   |                                                                                                                                                  |   |   |   |   |   |   |   |   |   |   |   |   |   |   |    |   |   |



|         |                                                                                                                                                                                                                                                                                                                                                                                                                                                                                                                                                                                                                                                                                                                                                                                                                                           |   |   |   |   |   |   |    |   |   |    |   |   |   |   |   |   |   |   |   |   |   |   |   |   |   |   |   |
|---------|-------------------------------------------------------------------------------------------------------------------------------------------------------------------------------------------------------------------------------------------------------------------------------------------------------------------------------------------------------------------------------------------------------------------------------------------------------------------------------------------------------------------------------------------------------------------------------------------------------------------------------------------------------------------------------------------------------------------------------------------------------------------------------------------------------------------------------------------|---|---|---|---|---|---|----|---|---|----|---|---|---|---|---|---|---|---|---|---|---|---|---|---|---|---|---|
| Otu1085 | 0                                                                                                                                                                                                                                                                                                                                                                                                                                                                                                                                                                                                                                                                                                                                                                                                                                         | 0 | 0 | 0 | 0 | 0 | 0 | 0  | 0 | 0 | 0  | 0 | 0 | 0 | 0 | 0 | 0 | 0 | 0 | 0 | 0 | 0 | 0 | 0 | 0 | 0 | 0 |   |
|         | 0                                                                                                                                                                                                                                                                                                                                                                                                                                                                                                                                                                                                                                                                                                                                                                                                                                         | 0 | 0 | 0 | 0 | 0 | 0 | 1  | 0 | 0 | 1  | 0 | 0 | 0 | 0 | 0 | 0 | 0 | 0 | 0 | 0 | 0 | 0 | 0 | 0 | 0 | 0 |   |
|         | 0                                                                                                                                                                                                                                                                                                                                                                                                                                                                                                                                                                                                                                                                                                                                                                                                                                         | 0 | 0 | 0 | 0 | 0 | 0 | 0  | 0 | 0 | 0  | 0 | 0 | 0 | 2 | 0 | 0 | 1 | 0 | 0 | 0 | 0 | 0 | 1 | 0 | 0 | 4 | 7 |
|         | 1                                                                                                                                                                                                                                                                                                                                                                                                                                                                                                                                                                                                                                                                                                                                                                                                                                         | 0 | 2 | 0 | 9 | 0 | 0 | 0  | 0 | 0 | 0  | 1 | 0 | 0 | 0 | 0 | 0 | 0 | 0 | 7 | 0 | 0 | 0 | 0 | 0 | 9 |   |   |
|         | M02255_76_000000000-ADUNE_1_2104_23423_20247 T---AA---GC-AC-CGG-----CTA-A-C-----T--A-C--G--TG-C-CAG-CA-----GC-C-G-C-GG-TA-----AT--A----CG-TA-GG-GT-----G-CG-A-G-C-G-----T--T-AATC-G-G-----AA---G-C-A-G-----G-A-T--G--TG--A-AA-TC--C-C-CG-G-G----CT-C-AA-----C-C-T-G-G-G-A-A-C---T-G--C-G--T--T-----C--TG-A-A--C-----T--G-G--GT--G-A-C---T-A-G-A-G-T-G--T-GT----CA-G-A-----G-G-G-A--GG-T----AG--A--ATT----C-C-A-C-GT--GT-A-G-CA-GT--G---A--A-A--TG-C-GT-AG--AG-A-TG--T-G--G-A-G-G-A-AT-A-CC--GA--T--G--GC-GAA-G--G-C-A-----G--C-C-T-C--CTG--G--GA-T-A-----A-C--A-C-T--GA--CG-T-T-C--A-TG--C-T-CG-A-AA-G-C--G-TG--GG-T--AG-C-A-AA-----CA--GG Bacteria(100);Proteobacteria(100);Betaproteobacteria(100);Neisseriales(100);Neisseriaceae(100);unclassified(100);unclassified(100);unclassified(100);unclassified(100);                        |   |   |   |   |   |   |    |   |   |    |   |   |   |   |   |   |   |   |   |   |   |   |   |   |   |   |   |
| Otu1086 | 0                                                                                                                                                                                                                                                                                                                                                                                                                                                                                                                                                                                                                                                                                                                                                                                                                                         | 0 | 0 | 0 | 0 | 0 | 0 | 0  | 0 | 0 | 0  | 0 | 0 | 0 | 0 | 0 | 0 | 0 | 0 | 0 | 0 | 0 | 0 | 0 | 0 | 5 | 0 |   |
|         | 0                                                                                                                                                                                                                                                                                                                                                                                                                                                                                                                                                                                                                                                                                                                                                                                                                                         | 0 | 0 | 0 | 0 | 0 | 0 | 0  | 0 | 0 | 0  | 0 | 0 | 0 | 0 | 0 | 0 | 0 | 0 | 0 | 0 | 0 | 0 | 0 | 0 | 0 | 0 |   |
|         | 0                                                                                                                                                                                                                                                                                                                                                                                                                                                                                                                                                                                                                                                                                                                                                                                                                                         | 0 | 0 | 0 | 0 | 0 | 0 | 0  | 0 | 0 | 0  | 0 | 0 | 0 | 0 | 0 | 0 | 0 | 0 | 0 | 0 | 0 | 0 | 0 | 0 | 0 | 0 |   |
|         | 0                                                                                                                                                                                                                                                                                                                                                                                                                                                                                                                                                                                                                                                                                                                                                                                                                                         | 0 | 0 | 0 | 0 | 0 | 0 | 0  | 0 | 0 | 0  | 0 | 0 | 0 | 0 | 0 | 0 | 0 | 0 | 0 | 0 | 0 | 0 | 0 | 0 | 0 | 0 |   |
|         | M02255_77_000000000-ADUT3_1_2118_18943_22183 T---AC---GT-AG-GGA-----GCA-A-G-----C--G--T---T--GT-T-CGG-AT-----TT-A--C-T--GG-GC-----GT--A---AA-GG-GC-GC-----G-TA-G-G-C-G-----G--C-GC-A-G-T-----AA---G-T-T-A-----C-T-T--G--TG--A-AA-TC--T-C-TG-A-G----CT-T-AA-----C-T-C-A-G-A-A--C-G---G-C--C-A--A-G-----T--AA-T-A--C-----T--G-C--AG--T-G-C---T-A-G-A-G-T-G--C-AG---AA-A-G-----G-G-C-A--AT-C-----GG--A--ATT---C-T-T-G-GT--GT-A-G-CG-GT--G---A--A-A--TG-C-GT-AG--AT-A-TC--A-A--G-A-G-G-A-AC-A-CC--TG--A--G--GC-GAA-G--G-C-G-----G--G-T-T-G--CTT--G--TC-T-G-----A-C--A-C-T--GA--CG-C-T-G--A-GG--C-G-CG-A-AA-G-C--C-AG--GG-G--AG-C-A-AA-----CG--GG Bacteria(100);Acidobacteria(100);Acidobacteria(100);Acidobacteriales(100);Acidobacteriaceae(100);Candidatus_Chloroacidobacterium(100);unclassified(100);unclassified(100);unclassified(100); |   |   |   |   |   |   |    |   |   |    |   |   |   |   |   |   |   |   |   |   |   |   |   |   |   |   |   |
| Otu1087 | 0                                                                                                                                                                                                                                                                                                                                                                                                                                                                                                                                                                                                                                                                                                                                                                                                                                         | 0 | 0 | 0 | 0 | 0 | 0 | 0  | 0 | 0 | 0  | 0 | 0 | 0 | 0 | 0 | 0 | 0 | 0 | 0 | 0 | 0 | 0 | 0 | 0 | 0 | 0 |   |
|         | 0                                                                                                                                                                                                                                                                                                                                                                                                                                                                                                                                                                                                                                                                                                                                                                                                                                         | 0 | 0 | 0 | 0 | 0 | 0 | 15 | 0 | 0 | 0  | 0 | 0 | 0 | 0 | 0 | 0 | 0 | 0 | 0 | 0 | 0 | 0 | 0 | 0 | 0 | 0 |   |
|         | 0                                                                                                                                                                                                                                                                                                                                                                                                                                                                                                                                                                                                                                                                                                                                                                                                                                         | 0 | 0 | 0 | 0 | 0 | 0 | 0  | 0 | 0 | 0  | 0 | 0 | 0 | 0 | 0 | 0 | 0 | 0 | 0 | 0 | 0 | 0 | 0 | 0 | 0 | 0 |   |
|         | 0                                                                                                                                                                                                                                                                                                                                                                                                                                                                                                                                                                                                                                                                                                                                                                                                                                         | 0 | 0 | 0 | 0 | 0 | 0 | 0  | 0 | 0 | 0  | 0 | 0 | 0 | 0 | 0 | 0 | 0 | 0 | 0 | 0 | 0 | 0 | 0 | 0 | 0 | 0 |   |
|         | M02255_77_000000000-ADUT3_1_1116_26109_19119 G---AC---AG-GG-GGC-----CCG-A-G-----C--G--T---T--AG-T-CGG-AA-----TT-A--C-T--GG-GC-----TT--A---AA-GG-GT-GC-----G-TA-G-G-C-G-----G--G-CC-C-G-T-----AA---G-T-G-T-----C-G-C--G--TG--A-AA-GC--C-C-AT-C-G----CT-C-AA-----C-G-A-T-G-G-A--A-C---C-G--C-G--C--G-----G--CA-A-A--C-----T--G-C--GG--G-T-C---T-C-G-A-G-G--A--A-GG---TA-G-A-----G-G-C-G--GG-T----GG--A--ACG---C-T-T-G-GT--GG-A-G-CG-GT--G---G--A-A--TG-C-GT-AG--AT-A-TC--A-A--G-C-G-G-A-AC-G-CC--GA--A--G--GT-GAA-G--A-C-A-----G--C-C-C-G--CTG--G--GC-C-T-----T-T--C-C-T--GA--CG-C-T-G--A-GG--C-A-CG-A-AA-G-C--G-TG--GG-G--AG-C-A-AA-----CA--GG Bacteria(100);unclassified(100);unclassified(100);unclassified(100);unclassified(100);unclassified(100);unclassified(100);unclassified(100);unclassified(100);                              |   |   |   |   |   |   |    |   |   |    |   |   |   |   |   |   |   |   |   |   |   |   |   |   |   |   |   |
| Otu1088 | 0                                                                                                                                                                                                                                                                                                                                                                                                                                                                                                                                                                                                                                                                                                                                                                                                                                         | 0 | 0 | 0 | 0 | 0 | 0 | 0  | 0 | 0 | 0  | 0 | 0 | 0 | 0 | 0 | 0 | 0 | 0 | 0 | 0 | 0 | 0 | 0 | 0 | 0 | 2 |   |
|         | 0                                                                                                                                                                                                                                                                                                                                                                                                                                                                                                                                                                                                                                                                                                                                                                                                                                         | 0 | 0 | 0 | 0 | 0 | 0 | 0  | 0 | 1 | 0  | 0 | 0 | 0 | 0 | 6 | 0 | 0 | 0 | 0 | 0 | 0 | 0 | 0 | 0 | 0 | 0 |   |
|         | 0                                                                                                                                                                                                                                                                                                                                                                                                                                                                                                                                                                                                                                                                                                                                                                                                                                         | 0 | 0 | 0 | 0 | 0 | 0 | 0  | 0 | 0 | 0  | 0 | 0 | 0 | 0 | 0 | 0 | 0 | 0 | 0 | 0 | 0 | 0 | 0 | 0 | 0 | 0 |   |
|         | 0                                                                                                                                                                                                                                                                                                                                                                                                                                                                                                                                                                                                                                                                                                                                                                                                                                         | 0 | 0 | 0 | 0 | 0 | 0 | 0  | 4 | 0 | 0  | 0 | 0 | 0 | 0 | 0 | 0 | 0 | 0 | 0 | 0 | 0 | 0 | 0 | 0 | 0 | 0 |   |
|         | M02255_76_000000000-ADUNE_1_2107_24733_8688 C---GT---GC-CA-GCA-----GCC-G-C-----G--G--T---A--AT-A-CGT-AT-----GT-C-G-C--AA-GC-----GT--T----AT-CC-GG-AT-----TTATTGGG-C-G-----G--G-AA-A-G-C-----GC---G-T-C-T-----G-A-T--G--TG--A-AA-AT-G-C-GG-G-G----CT-C-AA-----C-T-C-C-G-T-A-T-----T-G--C-G--T--T-----G--GA-A-A--C-----T--A-C--TT--T-T-C---T-A-G-A-G-T-A--T-CA---GA-G-A-----G-G-T-G--GG-C-----GG--A--ACT---A-C-A-A-GT--GT-A-G-AG-GT--G---A--A-A--TT-C-GT-AG--AT-A-TT--T-G--T-A-G-G-A-AT-G-CC--GA--T--G--GA-GAA-G--T-C-A-----G--C-T-C-A--CTG--G--AT-G-A-----A-T--A-C-T--GA--CG-C-T-A--A-AG--C-G-CG-A-AA-G-C--G-TG--GG-G--AG-C-A-AA-----CA--GG Bacteria(100);Fusobacteria(100);Fusobacteria(100);Fusobacteriales(100);Fusobacteriaceae(100);unclassified(100);unclassified(100);unclassified(100);unclassified(100);                          |   |   |   |   |   |   |    |   |   |    |   |   |   |   |   |   |   |   |   |   |   |   |   |   |   |   |   |
| Otu1089 | 0                                                                                                                                                                                                                                                                                                                                                                                                                                                                                                                                                                                                                                                                                                                                                                                                                                         | 0 | 0 | 0 | 0 | 0 | 0 | 0  | 0 | 0 | 0  | 0 | 0 | 0 | 0 | 0 | 0 | 0 | 0 | 0 | 0 | 0 | 0 | 0 | 0 | 0 | 0 |   |
|         | 0                                                                                                                                                                                                                                                                                                                                                                                                                                                                                                                                                                                                                                                                                                                                                                                                                                         | 0 | 0 | 0 | 0 | 0 | 0 | 8  | 0 | 0 | 22 | 0 | 0 | 0 | 0 | 0 | 0 | 0 | 0 | 0 | 0 | 0 | 0 | 0 | 0 | 0 | 0 |   |
|         | 0                                                                                                                                                                                                                                                                                                                                                                                                                                                                                                                                                                                                                                                                                                                                                                                                                                         | 0 | 0 | 0 | 0 | 0 | 0 | 0  | 0 | 0 | 0  | 0 | 0 | 0 | 0 | 0 | 0 | 0 | 0 | 0 | 0 | 0 | 0 | 0 | 0 | 0 | 0 |   |
|         | 0                                                                                                                                                                                                                                                                                                                                                                                                                                                                                                                                                                                                                                                                                                                                                                                                                                         | 0 | 0 | 0 | 0 | 0 | 0 | 0  | 0 | 0 | 0  | 0 | 0 | 0 | 0 | 0 | 0 | 0 | 0 | 0 | 0 | 0 | 0 | 0 | 0 | 0 | 0 |   |
|         | M02255_77_000000000-ADUT3_1_1112_12362_6967 T---AC---GT-AG-GAA-----GCA-A-G-----C--G--T---T--GC-C-CGG-AA-----TT-A--C-T--GG-GC-----GT--A---AA-GA-GC-TC-----G-TA-G-G-C-G-----G--G-GG-C-G-T-----GC---G-T-C-C-----G-G-G--A--AG--A-AA-TC--T-C-AA-G-G----CT-C-AAC---C-T-T-G-G-G-G--C-----T-A-T-C--T--C-----G--GA-T-A--C-----G--G-C--GC--T-T-C---T-T-G-A-G-G--G--T-GA---GA-G-A-----G-G-A-A--AG-T-----AG--A--ATT---C-C-C-G-GT--GT-A-G-CG-GT--G---A--A-A--TG-C-GT-AG--AT-A-TC--G-G--G-A-G-G-A-AT-A-CC--AG--C--G--GC-GAA-G--G-C-G-----A--C-T-T-T--CTG--G--CT-C-A-----T-T--C-C-T--GA--CG-C-T-G--A-GG--A-G-CG-A-AA-G-C--G-TG--GG-T--AG-C-G-AA-----CG--GG Bacteria(100);unclassified(100);unclassified(100);unclassified(100);unclassified(100);unclassified(100);unclassified(100);unclassified(100);unclassified(100);                                |   |   |   |   |   |   |    |   |   |    |   |   |   |   |   |   |   |   |   |   |   |   |   |   |   |   |   |



[illegible]



|         |                                                                                                                                                                                                                         |   |     |   |   |   |   |   |   |   |   |   |   |   |   |   |   |   |   |   |   |   |   |   |   |   |  |  |
|---------|-------------------------------------------------------------------------------------------------------------------------------------------------------------------------------------------------------------------------|---|-----|---|---|---|---|---|---|---|---|---|---|---|---|---|---|---|---|---|---|---|---|---|---|---|--|--|
| Otu1095 | 0                                                                                                                                                                                                                       | 0 | 0   | 0 | 0 | 0 | 0 | 0 | 0 | 0 | 0 | 0 | 0 | 0 | 0 | 0 | 0 | 0 | 0 | 0 | 0 | 0 | 0 | 0 | 0 | 0 |  |  |
|         | 0                                                                                                                                                                                                                       | 0 | 0   | 0 | 0 | 0 | 0 | 0 | 0 | 0 | 0 | 0 | 0 | 0 | 0 | 0 | 0 | 0 | 0 | 0 | 0 | 0 | 0 | 0 | 0 | 0 |  |  |
|         | 0                                                                                                                                                                                                                       | 0 | 0   | 0 | 0 | 0 | 0 | 0 | 0 | 0 | 0 | 0 | 0 | 0 | 0 | 0 | 0 | 0 | 0 | 0 | 0 | 0 | 0 | 0 | 0 | 0 |  |  |
|         | 0                                                                                                                                                                                                                       | 0 | 46  | 0 | 0 | 0 | 0 | 0 | 0 | 0 | 0 | 0 | 0 | 0 | 0 | 0 | 0 | 0 | 0 | 0 | 0 | 0 | 0 | 0 | 0 | 0 |  |  |
|         | M02255_77_000000000-ADUT3_1_1103_27340_11493 T---AC--GT-AT-GGG-----GCA-A-G----C-G-T--T--AT-C-CGG-AA-----TT-A--T-T-GG-GC-----GT-A----AA-GA-GT-GC-----G-TA-G-G-T-G-----G-T-TA-C-C-T-----                                  |   |     |   |   |   |   |   |   |   |   |   |   |   |   |   |   |   |   |   |   |   |   |   |   |   |  |  |
|         | -----AA---G-C-G-C-----A-A-G--G--TT--T-AA-TC--T-T-GA-G-G----CT-C-AA-----C-C-T-C-A-T-T-C-----T-G--C-C--T-T-----G--CG-A-A--C-----T-G-G--GC--T-A-C---T-T-G-A-G-T-G---C-AG----GA-G-G-----G-G-A-A--AG-C-----GG--A--ATT---C-C- |   |     |   |   |   |   |   |   |   |   |   |   |   |   |   |   |   |   |   |   |   |   |   |   |   |  |  |
|         | C-A-GT--GT-A-G-CG-GT--G---A--A-A---TG-C-GT-AG--AT-A-TT--G-G--G-A-A-G-A-AC-A-CC--GG--T--G--GC-GAA-G-G-C-G-----G--C-T-T-T---CTG--G--AC-T-G-----T-A--A-C-T--GA--CA-C-T-G--A-GG--C-A-CG-A--AA-G-C---G-TG--GG-G--            |   |     |   |   |   |   |   |   |   |   |   |   |   |   |   |   |   |   |   |   |   |   |   |   |   |  |  |
|         | AG-C-A-AA-----CA--GG Bacteria(100);Firmicutes(100);Clostridia(100);Clostridiales(100);Family_XIII_Incertae_Sedis(100);unclassified(100);unclassified(100);unclassified(100);unclassified(100);                          |   |     |   |   |   |   |   |   |   |   |   |   |   |   |   |   |   |   |   |   |   |   |   |   |   |  |  |
| Otu1096 | 0                                                                                                                                                                                                                       | 0 | 0   | 0 | 0 | 0 | 0 | 0 | 0 | 0 | 0 | 0 | 0 | 0 | 0 | 0 | 0 | 0 | 0 | 0 | 0 | 0 | 0 | 0 | 0 | 0 |  |  |
|         | 0                                                                                                                                                                                                                       | 0 | 0   | 0 | 0 | 0 | 0 | 0 | 0 | 0 | 0 | 0 | 0 | 0 | 0 | 0 | 0 | 0 | 0 | 0 | 0 | 0 | 0 | 0 | 0 | 0 |  |  |
|         | 0                                                                                                                                                                                                                       | 0 | 0   | 0 | 0 | 0 | 0 | 0 | 0 | 0 | 0 | 0 | 0 | 0 | 0 | 0 | 0 | 0 | 0 | 0 | 0 | 0 | 0 | 0 | 0 | 0 |  |  |
|         | 0                                                                                                                                                                                                                       | 0 | 40  | 0 | 0 | 0 | 0 | 0 | 0 | 0 | 0 | 0 | 0 | 0 | 0 | 0 | 0 | 0 | 0 | 0 | 0 | 0 | 0 | 0 | 0 | 0 |  |  |
|         | M02255_77_000000000-ADUT3_1_1104_18218_13698 T---AC--GT-AG-GGT-----CCA-A-G----C-G-T--T--GT-C-CGG-AT-----TT-A--T-T-GG-GC-----GT-A----AA-GA-GC-TC-----G-TA-G-G-C-G-----G-T-TC-C-G-T-----                                  |   |     |   |   |   |   |   |   |   |   |   |   |   |   |   |   |   |   |   |   |   |   |   |   |   |  |  |
|         | -----AA---G-T-C-G-----G-A-T--G--TG--A-AA-AC--T-C-AG-G-G----CT-C-AA-----C-C-C-G-G-A-G--A---C-G-CC-A--T-C-----T-GA-T-A--C-----T-G-C--GG-TG-A-C---T-G-G-A-G-T-C---T-GG---TA-G-G-----G-G-A-T--CA-C-----GG--A--ATA---        |   |     |   |   |   |   |   |   |   |   |   |   |   |   |   |   |   |   |   |   |   |   |   |   |   |  |  |
|         | C-C-T-G-GT--GT-A-G-CG-GT--G---A--A-A---TG-C-GC-AG--AT-A-TC--A-G--G-T-G-G-A-AC-A-CC--GA--T--G--GC-GAA-G-G-C-A-----G--T-G-A-T---CTG--G--GC-C-A-----G-T--A-C-T--GA--CG-C-T-G--A-GG--A-G-CG-A--AA-G-C---G-TG--              |   |     |   |   |   |   |   |   |   |   |   |   |   |   |   |   |   |   |   |   |   |   |   |   |   |  |  |
|         | GG-G--AG-C-A-AA-----CA--GG Bacteria(100);unclassified(100);unclassified(100);unclassified(100);unclassified(100);unclassified(100);unclassified(100);unclassified(100);                                                 |   |     |   |   |   |   |   |   |   |   |   |   |   |   |   |   |   |   |   |   |   |   |   |   |   |  |  |
| Otu1097 | 0                                                                                                                                                                                                                       | 0 | 0   | 0 | 0 | 0 | 0 | 0 | 0 | 0 | 0 | 0 | 0 | 0 | 0 | 0 | 0 | 0 | 0 | 0 | 0 | 0 | 0 | 0 | 0 | 0 |  |  |
|         | 0                                                                                                                                                                                                                       | 0 | 0   | 0 | 0 | 0 | 0 | 0 | 0 | 0 | 0 | 0 | 0 | 0 | 0 | 0 | 0 | 0 | 0 | 0 | 0 | 0 | 0 | 0 | 0 | 0 |  |  |
|         | 0                                                                                                                                                                                                                       | 0 | 0   | 0 | 0 | 0 | 0 | 0 | 0 | 0 | 0 | 0 | 0 | 0 | 0 | 0 | 0 | 0 | 0 | 0 | 0 | 0 | 0 | 0 | 0 | 0 |  |  |
|         | 0                                                                                                                                                                                                                       | 0 | 153 | 0 | 0 | 0 | 0 | 0 | 0 | 0 | 0 | 0 | 0 | 0 | 0 | 0 | 0 | 0 | 0 | 0 | 0 | 0 | 0 | 0 | 0 | 0 |  |  |
|         | M02255_77_000000000-ADUT3_1_1106_9089_22388 T---AC--GT-AG-GTG-----GCA-A-G----C-G-T--T--GT-C-CGG-AT-----TT-A--C-T-GG-GC-----GT-A----AA-GC-GC-GC-----G-CA-G-G-C-G-----G--A-AG-G-T-T-----                                  |   |     |   |   |   |   |   |   |   |   |   |   |   |   |   |   |   |   |   |   |   |   |   |   |   |  |  |
|         | AA---G-T-A-G-----G-A-A--G--TG--A-AA-GG--T-T-GG-A-G----CT-C-AA-----C-T-C-C-A-A-C--A-C---T-G--C-T--C-C-----C--TA-T-A--C-----T-G-G--CC--C-T-C---T-T-G-A-G-T-C---C-CG---GA-G-A-----G-G-A-A--AG-C-----GG--A--ACG---A-C-A-    |   |     |   |   |   |   |   |   |   |   |   |   |   |   |   |   |   |   |   |   |   |   |   |   |   |  |  |
|         | C-GT--GG-A-G-CG-GT--G---A--A-A---TG-C-GT-TG--AT-A-TG--T-G--T-C-G-G-A-AC-A-CC--AA--T--G--GC-GAA-G-G-C-A-----G--C-T-T-T---CTG--G--AC-G-G-----G-A--A-C-T--GA--CG-C-T-C--A-GG--C-G-CG-A--AA-G-C---C-GA--GG-T--AG-           |   |     |   |   |   |   |   |   |   |   |   |   |   |   |   |   |   |   |   |   |   |   |   |   |   |  |  |
|         | C-G-AA-----CA--GG Bacteria(100);unclassified(100);unclassified(100);unclassified(100);unclassified(100);unclassified(100);unclassified(100);unclassified(100);                                                          |   |     |   |   |   |   |   |   |   |   |   |   |   |   |   |   |   |   |   |   |   |   |   |   |   |  |  |
| Otu1098 | 0                                                                                                                                                                                                                       | 0 | 0   | 0 | 0 | 0 | 0 | 0 | 0 | 0 | 0 | 0 | 0 | 0 | 0 | 0 | 0 | 0 | 0 | 0 | 0 | 0 | 0 | 0 | 0 | 0 |  |  |
|         | 0                                                                                                                                                                                                                       | 0 | 0   | 0 | 0 | 0 | 0 | 0 | 0 | 0 | 0 | 0 | 0 | 0 | 0 | 0 | 0 | 0 | 0 | 0 | 0 | 0 | 0 | 0 | 0 | 0 |  |  |
|         | 0                                                                                                                                                                                                                       | 0 | 0   | 0 | 0 | 0 | 0 | 0 | 0 | 0 | 0 | 0 | 0 | 0 | 0 | 0 | 0 | 0 | 0 | 0 | 0 | 0 | 0 | 0 | 0 | 0 |  |  |
|         | 0                                                                                                                                                                                                                       | 0 | 29  | 0 | 0 | 0 | 0 | 0 | 0 | 0 | 0 | 0 | 0 | 0 | 0 | 0 | 0 | 0 | 0 | 0 | 0 | 0 | 0 | 0 | 0 | 0 |  |  |
|         | M02255_77_000000000-ADUT3_1_1107_11076_7786 T---AC--GT-AG-GGT-----GCA-A-G----C-A-T--T                                                                                                                                   |   |     |   |   |   |   |   |   |   |   |   |   |   |   |   |   |   |   |   |   |   |   |   |   |   |  |  |



[illegible]



|                                                                                                                                                                                                                              |   |   |   |                                                                                                                                                                                              |   |   |   |   |   |   |   |   |   |   |   |   |   |   |   |   |   |   |   |   |   |   |   |  |  |
|------------------------------------------------------------------------------------------------------------------------------------------------------------------------------------------------------------------------------|---|---|---|----------------------------------------------------------------------------------------------------------------------------------------------------------------------------------------------|---|---|---|---|---|---|---|---|---|---|---|---|---|---|---|---|---|---|---|---|---|---|---|--|--|
| Otu1105                                                                                                                                                                                                                      | 0 | 0 | 0 | 0                                                                                                                                                                                            | 0 | 0 | 0 | 0 | 0 | 0 | 0 | 0 | 0 | 0 | 0 | 0 | 0 | 0 | 0 | 0 | 0 | 0 | 0 | 0 | 0 | 0 | 0 |  |  |
|                                                                                                                                                                                                                              | 0 | 0 | 0 | 0                                                                                                                                                                                            | 0 | 0 | 0 | 0 | 0 | 0 | 0 | 0 | 0 | 0 | 0 | 0 | 0 | 0 | 0 | 0 | 0 | 0 | 0 | 0 | 0 | 0 | 0 |  |  |
|                                                                                                                                                                                                                              | 0 | 0 | 0 | 0                                                                                                                                                                                            | 0 | 0 | 0 | 0 | 0 | 0 | 0 | 0 | 0 | 0 | 0 | 0 | 0 | 0 | 0 | 0 | 0 | 0 | 0 | 0 | 0 | 0 | 0 |  |  |
|                                                                                                                                                                                                                              | 0 | 0 | 0 | 19                                                                                                                                                                                           | 0 | 0 | 0 | 0 | 0 | 0 | 0 | 0 | 0 | 0 | 0 | 0 | 0 | 0 | 0 | 0 | 0 | 0 | 0 | 0 | 0 | 0 | 0 |  |  |
| M02255_76_000000000-ADUNE_1_1112_23464_24737                                                                                                                                                                                 |   |   |   | C---GG---CT-AA-CTC-----CGT-G-C----C--A--G--C--AG-C-CGC-GG-----TA-A-T-A--CG-GA-----GG--A----TC-CA-AG-CG-----T-TA-T-C-C-G-----GA-T-TT-A-T-T-----                                               |   |   |   |   |   |   |   |   |   |   |   |   |   |   |   |   |   |   |   |   |   |   |   |  |  |
| -----AA---G-T-C-A-----G-G-G-G--TG--A-AA-AC--T-T-GC-G-G----CT-C-AA-----C-C-G-T-A-A-G--C-T---T-G--C-C---T-T-----T--GA-T-A---C-----T--G-A--GG--A-G-C---T-T-G-A-A-T--A--C-AC-----TT-G-A-----G-G-T-A--GG-C-----GG--A--ATG----T-   |   |   |   |                                                                                                                                                                                              |   |   |   |   |   |   |   |   |   |   |   |   |   |   |   |   |   |   |   |   |   |   |   |  |  |
| G-A-C-AA--GT-A-G-CG-GT--G---A--A-A---TG-C-AT-AG--AT-A-TG--T-C--A-C-A-G-A-AC-A-CC---AA--T--T--GC-GAA-G--G-C--A-----G--C-T-T-A---CTA--A--AG-T-G-----T-G---A-T-T--GA--CG-C-T-G--A-GG--C-A-CG-A--AA-G-C---G-TG--GG-G-            |   |   |   |                                                                                                                                                                                              |   |   |   |   |   |   |   |   |   |   |   |   |   |   |   |   |   |   |   |   |   |   |   |  |  |
| -AT-C-A-AA-----CA--GG                                                                                                                                                                                                        |   |   |   | Bacteria(100);Bacteroidetes(100);Sphingobacteria(100);Sphingobacteriales(100);Sphingobacteriaceae(100);unclassified(100);unclassified(100);unclassified(100);unclassified(100);              |   |   |   |   |   |   |   |   |   |   |   |   |   |   |   |   |   |   |   |   |   |   |   |  |  |
| Otu1106                                                                                                                                                                                                                      | 0 | 0 | 0 | 0                                                                                                                                                                                            | 0 | 0 | 0 | 0 | 0 | 0 | 0 | 0 | 0 | 0 | 0 | 0 | 0 | 0 | 0 | 0 | 0 | 0 | 0 | 0 | 0 | 0 | 0 |  |  |
|                                                                                                                                                                                                                              | 0 | 0 | 0 | 0                                                                                                                                                                                            | 0 | 0 | 0 | 0 | 0 | 0 | 0 | 0 | 0 | 0 | 0 | 0 | 0 | 0 | 0 | 0 | 0 | 0 | 0 | 0 | 0 | 0 | 0 |  |  |
|                                                                                                                                                                                                                              | 0 | 0 | 0 | 0                                                                                                                                                                                            | 0 | 0 | 0 | 0 | 0 | 0 | 0 | 0 | 0 | 0 | 0 | 0 | 0 | 0 | 0 | 0 | 0 | 0 | 0 | 0 | 0 | 0 | 0 |  |  |
|                                                                                                                                                                                                                              | 0 | 0 | 0 | 15                                                                                                                                                                                           | 0 | 0 | 0 | 0 | 0 | 0 | 0 | 0 | 0 | 0 | 0 | 0 | 0 | 0 | 0 | 0 | 0 | 0 | 0 | 0 | 0 | 0 | 0 |  |  |
| M02255_76_000000000-ADUNE_1_1113_18848_12640                                                                                                                                                                                 |   |   |   | T---AA---GC-AC-CGG-----CTA-A-C-----T--A--C---G--TG-C-CAG-CA-----GC-C--G-C--GG-TA-----AT--A----CG-TA-GG-GT-----G-CA-A-G-C-G-----T--T-AA-TCG-G-----                                            |   |   |   |   |   |   |   |   |   |   |   |   |   |   |   |   |   |   |   |   |   |   |   |  |  |
| -----AA---G-A-C-C-----G-A-T-G--TG--A-AA-TC--C-C-CG-G-G----CT-C-AA-----C-C-T-G-G-G-A--A-C---T-G--C-A---T-T-----G--GT-G-A---C-----T--G-C--AT--C-G-C---T-T-G-A-G-T--A--T-GG-----CA-G-A-----G-G-G-G---GG-T-----AG--A--ATT---C-   |   |   |   |                                                                                                                                                                                              |   |   |   |   |   |   |   |   |   |   |   |   |   |   |   |   |   |   |   |   |   |   |   |  |  |
| C-A-C-GT--GT-A-G-CA-GT--G---A--A-A---TG-C-GT-AG--AG-A-TG--T-G--G-A-G-G-A-AT-A-CC---GA--T--G--GC-GAA-G--G-C--A-----G--C-C-C-C---CTG--G--GT-C-A-----A-T---A-C-T--GA--CG-C-T-C--A-TG--C-A-CG-A--AA-G-C---G-TG--GG-G-            |   |   |   |                                                                                                                                                                                              |   |   |   |   |   |   |   |   |   |   |   |   |   |   |   |   |   |   |   |   |   |   |   |  |  |
| -AG-C-A-AA-----CA--GG                                                                                                                                                                                                        |   |   |   | Bacteria(100);Proteobacteria(100);Betaproteobacteria(100);unclassified(100);unclassified(100);unclassified(100);unclassified(100);unclassified(100);unclassified(100);                       |   |   |   |   |   |   |   |   |   |   |   |   |   |   |   |   |   |   |   |   |   |   |   |  |  |
| Otu1107                                                                                                                                                                                                                      | 0 | 0 | 0 | 0                                                                                                                                                                                            | 0 | 0 | 0 | 0 | 0 | 0 | 0 | 0 | 0 | 0 | 0 | 0 | 0 | 0 | 0 | 0 | 0 | 0 | 0 | 0 | 0 | 0 | 0 |  |  |
|                                                                                                                                                                                                                              | 0 | 0 | 0 | 0                                                                                                                                                                                            | 0 | 0 | 0 | 0 | 0 | 0 | 0 | 0 | 0 | 0 | 0 | 0 | 0 | 0 | 0 | 0 | 0 | 0 | 0 | 0 | 0 | 0 | 0 |  |  |
|                                                                                                                                                                                                                              | 0 | 0 | 0 | 0                                                                                                                                                                                            | 0 | 0 | 0 | 0 | 0 | 0 | 0 | 0 | 0 | 0 | 0 | 0 | 0 | 0 | 0 | 0 | 0 | 0 | 0 | 0 | 0 | 0 | 0 |  |  |
|                                                                                                                                                                                                                              | 0 | 0 | 0 | 26                                                                                                                                                                                           | 0 | 0 | 0 | 0 | 0 | 0 | 0 | 0 | 0 | 0 | 0 | 0 | 0 | 0 | 0 | 0 | 0 | 0 | 0 | 0 | 0 | 0 | 0 |  |  |
| M02255_77_000000000-ADUT3_1_1104_5280_16508                                                                                                                                                                                  |   |   |   | T---AC---GA-GG-GGG-----GCG-A-G-----C--G--T---T--GT-T-CGG-AA-----TT-A-T-T--GG-GC-----GT--A----AA-GG-GT-GC-----G-TA-G-G-C-G-----G--T-TT-G-G-T-----                                             |   |   |   |   |   |   |   |   |   |   |   |   |   |   |   |   |   |   |   |   |   |   |   |  |  |
| AA---G-T-C-T-----G-A-T--G--TG--A-AA-TC--T-A-TG-G-G----CT-C-AA-----C-T-C-A-T-A-G--T-C---T-G--C-A---T-C-----G--GA-A-A---C-----T--G-C--CG--G-G-C---T-T-G-A-G-T--A--T-GG-----GA-G-A-----G-G-T-G--AG-T-----GG--A--ATT---C-C-T-    |   |   |   |                                                                                                                                                                                              |   |   |   |   |   |   |   |   |   |   |   |   |   |   |   |   |   |   |   |   |   |   |   |  |  |
| G-GT--GT-A-G-CG-GT--G---A--A-A---TG-C-GT-AG--AT-A-TC--A-G--G-A-G-G-A-AC-A-CC---TG--T--G--GC-GAA-A-G-C--G-----G--C-T-C-A---CTG--G--AC-C-A-----T-A---A-C-T--GA--CG-C-T-G--A-TG--C-A-CG-A--AA-G-C---T-AG--GG-G--                |   |   |   |                                                                                                                                                                                              |   |   |   |   |   |   |   |   |   |   |   |   |   |   |   |   |   |   |   |   |   |   |   |  |  |
| AG-C-A-AA-----CA--GG                                                                                                                                                                                                         |   |   |   | Bacteria(100);Acidobacteria(100);Acidobacteria(100);Acidobacteriales(100);Acidobacteriaceae(100);Acidobacterium(100);unclassified(100);unclassified(100);unclassified(100);                  |   |   |   |   |   |   |   |   |   |   |   |   |   |   |   |   |   |   |   |   |   |   |   |  |  |
| Otu1108                                                                                                                                                                                                                      | 0 | 0 | 0 | 0                                                                                                                                                                                            | 0 | 0 | 0 | 0 | 0 | 0 | 0 | 0 | 0 | 0 | 0 | 0 | 0 | 0 | 0 | 0 | 0 | 0 | 0 | 0 | 0 | 0 | 0 |  |  |
|                                                                                                                                                                                                                              | 0 | 0 | 0 | 0                                                                                                                                                                                            | 0 | 0 | 0 | 0 | 0 | 0 | 0 | 0 | 0 | 0 | 0 | 0 | 0 | 0 | 0 | 0 | 0 | 0 | 0 | 0 | 0 | 0 | 0 |  |  |
|                                                                                                                                                                                                                              | 0 | 0 | 0 | 0                                                                                                                                                                                            | 0 | 0 | 0 | 0 | 0 | 0 | 0 | 0 | 0 | 0 | 0 | 0 | 0 | 0 | 0 | 0 | 0 | 0 | 0 | 0 | 0 | 0 | 0 |  |  |
|                                                                                                                                                                                                                              | 0 | 0 | 0 | 27                                                                                                                                                                                           | 0 | 0 | 1 | 0 | 0 | 0 | 0 | 0 | 0 | 0 | 0 | 0 | 0 | 0 | 0 | 0 | 0 | 0 | 0 | 0 | 0 | 0 | 0 |  |  |
| M02255_77_000000000-ADUT3_1_1108_7485_4275                                                                                                                                                                                   |   |   |   | T---AC---GT-AG-GGG-----GCA-A-G-----C--G--T---T--GT-T-CGG-AT-----TT-A-C-T--GG-GC-----GT--A----AA-GG-GC-GC-----G-TA-G-G-C-G-----G--C-GT-G-A-C-----                                             |   |   |   |   |   |   |   |   |   |   |   |   |   |   |   |   |   |   |   |   |   |   |   |  |  |
| AA---G-T-C-A-----G-T-T--G--TG--A-AA-TC--T-C-TG-A-G----CT-T-AA-----C-T-C-A-G-A-A--C-G---G-T--C-A---A-C-----T--GA-T-A---C-----T--G-T--TG--T-G-C---T-A-G-A-G-T--G---C-AG-----AA-G-G-----G-G-C-A---AC-C-----GG--A--ATT---C-T-T-  |   |   |   |                                                                                                                                                                                              |   |   |   |   |   |   |   |   |   |   |   |   |   |   |   |   |   |   |   |   |   |   |   |  |  |
| G-GT--GT-A-G-CG-GT--G---A--A-A---TG-C-GT-AG--AT-A-TC--A-A--G-A-G-G-A-AC-A-CC---TG--A--G--GT-GAA-G--A-C--G-----G--G-T-T-G---CTG--G--GC-T-G-----A-C---A-C-T--GA--CG-C-T-G--A-GG--C-G-CG-A--AA-G-C---T-AG--GG-T--               |   |   |   |                                                                                                                                                                                              |   |   |   |   |   |   |   |   |   |   |   |   |   |   |   |   |   |   |   |   |   |   |   |  |  |
| AG-C-A-AA-----CG--GG                                                                                                                                                                                                         |   |   |   | Bacteria(100);Acidobacteria(100);Acidobacteria(100);Acidobacteriales(100);Acidobacteriaceae(100);Candidatus_Chloroacidobacterium(100);unclassified(100);unclassified(100);unclassified(100); |   |   |   |   |   |   |   |   |   |   |   |   |   |   |   |   |   |   |   |   |   |   |   |  |  |
| Otu1109                                                                                                                                                                                                                      | 0 | 0 | 0 | 0                                                                                                                                                                                            | 0 | 0 | 0 | 0 | 0 | 0 | 0 | 0 | 0 | 0 | 0 | 0 | 0 | 0 | 0 | 0 | 0 | 0 | 0 | 0 | 0 | 0 | 0 |  |  |
|                                                                                                                                                                                                                              | 0 | 0 | 0 | 0                                                                                                                                                                                            | 0 | 0 | 0 | 0 | 0 | 0 | 0 | 0 | 0 | 0 | 0 | 0 | 0 | 0 | 0 | 0 | 0 | 0 | 0 | 0 | 0 | 0 | 0 |  |  |
|                                                                                                                                                                                                                              | 0 | 0 | 0 | 0                                                                                                                                                                                            | 0 | 0 | 0 | 0 | 0 | 0 | 0 | 0 | 0 | 0 | 0 | 0 | 0 | 0 | 0 | 0 | 0 | 0 | 0 | 0 | 0 | 0 | 0 |  |  |
|                                                                                                                                                                                                                              | 0 | 0 | 0 | 33                                                                                                                                                                                           | 0 | 0 | 0 | 0 | 0 | 0 | 0 | 0 | 0 | 0 | 0 | 0 | 0 | 0 | 0 | 0 | 0 | 0 | 0 | 0 | 0 | 0 | 0 |  |  |
| M02255_77_000000000-ADUT3_1_1110_5363_16680                                                                                                                                                                                  |   |   |   | T---AC---AG-AG-GTG-----CCA-A-G-----C--G--T---T--AG-G-CGG-AA-----TC-A-C-T--GG-GC-----TT--A----AA-GC-GC-GT-----G-TA-G-G-T-G-----G--A-CG-G-G-T-----                                             |   |   |   |   |   |   |   |   |   |   |   |   |   |   |   |   |   |   |   |   |   |   |   |  |  |
| AA---G-T-A-T-----C-T-T--G--TG--A-AA-TC--C-C-AC-G-G----CT-C-AA-----C-C-G-T-G-G-A--A-C---T-G--C-T---G--G-----A--TA-T-A---C-----T--G-C--TT--G-T-C---T-T-G-A-G-G--C---A-CT-----TA-G-G-----G-G-C-A---GC-T-----GG--A--ACA---A-A-T- |   |   |   |                                                                                                                                                                                              |   |   |   |   |   |   |   |   |   |   |   |   |   |   |   |   |   |   |   |   |   |   |   |  |  |
| G-GT--GG-A-G-CG-GT--G---A--A-A---TG-C-GT-AG--AT-A-TC--A-T--T-T-G-G-A-AC-G-CC---AA--A--G--GC-GAA-A-G-C--A-----G--G-C-T-G---CTG--G--GA-G-T-----G-A---T-C-T--GA--CA-C-T-G--A-GA--C-G-CG-A--AA-G-C---C-AG--GT-G--                |   |   |   |                                                                                                                                                                                              |   |   |   |   |   |   |   |   |   |   |   |   |   |   |   |   |   |   |   |   |   |   |   |  |  |
| AG-C-A-AA-----CG--GG                                                                                                                                                                                                         |   |   |   | Bacteria(100);Planctomycetes(100);Phycisphaerae(100);unclassified(100);unclassified(100);unclassified(100);unclassified(100);unclassified(100);unclassified(100);                            |   |   |   |   |   |   |   |   |   |   |   |   |   |   |   |   |   |   |   |   |   |   |   |  |  |



|                                                                                                                                                                                                                                                                                                                                                                                                                                                                                                                                                                                                                                                                                                                                                                                                                           |   |    |   |   |   |   |   |   |   |   |   |   |   |   |   |   |   |   |   |   |   |   |   |   |   |   |   |  |
|---------------------------------------------------------------------------------------------------------------------------------------------------------------------------------------------------------------------------------------------------------------------------------------------------------------------------------------------------------------------------------------------------------------------------------------------------------------------------------------------------------------------------------------------------------------------------------------------------------------------------------------------------------------------------------------------------------------------------------------------------------------------------------------------------------------------------|---|----|---|---|---|---|---|---|---|---|---|---|---|---|---|---|---|---|---|---|---|---|---|---|---|---|---|--|
| Otu1110                                                                                                                                                                                                                                                                                                                                                                                                                                                                                                                                                                                                                                                                                                                                                                                                                   | 0 | 0  | 0 | 0 | 0 | 0 | 0 | 0 | 0 | 0 | 0 | 0 | 0 | 0 | 0 | 0 | 0 | 0 | 0 | 0 | 0 | 0 | 0 | 0 | 0 | 0 | 0 |  |
|                                                                                                                                                                                                                                                                                                                                                                                                                                                                                                                                                                                                                                                                                                                                                                                                                           | 0 | 0  | 0 | 0 | 0 | 0 | 0 | 0 | 0 | 0 | 0 | 0 | 0 | 0 | 0 | 0 | 0 | 0 | 0 | 0 | 0 | 0 | 0 | 0 | 0 | 0 | 0 |  |
|                                                                                                                                                                                                                                                                                                                                                                                                                                                                                                                                                                                                                                                                                                                                                                                                                           | 0 | 0  | 0 | 0 | 0 | 0 | 0 | 0 | 0 | 0 | 0 | 0 | 0 | 0 | 0 | 0 | 0 | 0 | 0 | 0 | 0 | 0 | 0 | 0 | 0 | 0 | 0 |  |
|                                                                                                                                                                                                                                                                                                                                                                                                                                                                                                                                                                                                                                                                                                                                                                                                                           | 0 | 88 | 0 | 0 | 0 | 0 | 0 | 0 | 0 | 0 | 0 | 0 | 0 | 0 | 0 | 0 | 0 | 0 | 0 | 0 | 0 | 0 | 0 | 0 | 0 | 0 | 0 |  |
| M02255_77_000000000-ADUT3_1_1119_7036_21703 T---AC--GA-AG-GGG-----GCT-A-G-----C-G-T--T--GC-T-CGG-AA-----TC-A-C-T--GG-GC-----GT-A----AA-GG-GC-GC-----G-TA-G-G-C-G-----G-A-CA-T-T-T-----<br>AA---G-T-C-G-----G-G-G--G-TG--A-AA-GC--C-C-AG-G-G----CT-C-AA-----C-C-C-T-G-G-A-A-T---T-G--C-C--T--C-----C-GA-T-A--C-----T-G-G--GT--G-T-C---T-C-G-A-G-A-C---C-GG---AA-G-A-----G-G-T-G--AG-T-----GG--A--ACT---G-C-<br>G-A-GT--GT-A-G-AG-GT--G---A-A-A---TT-C-GT-AG--AT-A-TT--C-G--C-A-A-G-A-AC-A-CC--AG--T-G--GC-GAA-G--G-C-G-----G-C-T-C-A--CTG--G--TC-C-G-----G-T--T-C-T--GA--CG-C-T-G--A-GG--C-G-CG-A-AA-G-C--G-TG--GG-G--<br>AG-C-A-AA-----CA--GG Bacteria(100);Proteobacteria(100);Alphaproteobacteria(100);Rhizobiales(100);unclassified(100);unclassified(100);unclassified(100);unclassified(100);unclassified(100);      |   |    |   |   |   |   |   |   |   |   |   |   |   |   |   |   |   |   |   |   |   |   |   |   |   |   |   |  |
| Otu1111                                                                                                                                                                                                                                                                                                                                                                                                                                                                                                                                                                                                                                                                                                                                                                                                                   | 0 | 0  | 0 | 0 | 0 | 0 | 0 | 0 | 0 | 0 | 0 | 0 | 0 | 0 | 0 | 0 | 0 | 0 | 0 | 0 | 0 | 0 | 0 | 0 | 0 | 0 | 0 |  |
|                                                                                                                                                                                                                                                                                                                                                                                                                                                                                                                                                                                                                                                                                                                                                                                                                           | 0 | 0  | 0 | 0 | 0 | 0 | 0 | 0 | 0 | 0 | 0 | 0 | 0 | 0 | 0 | 0 | 0 | 0 | 0 | 0 | 0 | 0 | 0 | 0 | 0 | 0 | 0 |  |
|                                                                                                                                                                                                                                                                                                                                                                                                                                                                                                                                                                                                                                                                                                                                                                                                                           | 0 | 0  | 0 | 0 | 0 | 0 | 0 | 0 | 0 | 0 | 0 | 0 | 0 | 0 | 0 | 0 | 0 | 0 | 0 | 0 | 0 | 0 | 0 | 0 | 0 | 0 | 0 |  |
|                                                                                                                                                                                                                                                                                                                                                                                                                                                                                                                                                                                                                                                                                                                                                                                                                           | 0 | 30 | 0 | 0 | 0 | 0 | 0 | 0 | 0 | 0 | 0 | 0 | 0 | 0 | 0 | 0 | 0 | 0 | 0 | 0 | 0 | 0 | 0 | 0 | 0 | 0 | 0 |  |
| M02255_76_000000000-ADUNE_1_1106_8121_6593 G---TG--CC-AG-CAG-----CCG-C-G-----G--T--A-AG-A-CGT-AG-----GG-C--G-C-GA-GC-----GT-T----GT-CC-GG-AT-----T-TA-T-T-G-G-----G--C-TC-G-T-C-----GC--<br>--G-T-C-T-----G-C-C--G--TG--A-AA-GA--C-C-AT-G-G----CT-T-AA-----C-T-G-T-G-G-T-T-T---T-G--C-G--G--T-----G-GA-T-A--C-----G--G-G--CG--G-G-C---T-T-G-A-G-G-C--C-AG---TA-G-G-----G-G-A-G--AT-C-----GG--A--ATT---C-T-A-C-<br>GT--GT-A-G-CG-GT--G---A-A-A---TG-C-GC-AG--AT-A-TG--T-G--G-A-G-G-A-AC-A-CC--GG--T-G--GC-GAA-G--G-C-G-----G--A-T-C-T---CTG--G--GC-T-G-----G-T--T-C-T--GA--CG-C-T-G--A-GG--A-G-CG-A-AA-G-C--A-TG--GG-G--AG-<br>C-G-AA-----CA--GG Bacteria(100);Actinobacteria(100);Actinobacteria(100);Actinobacteridae(100);Actinomycetales(100);Glycomycineae(100);Glycomycetaceae(100);Glycomyces(100);Glycomyces(100); |   |    |   |   |   |   |   |   |   |   |   |   |   |   |   |   |   |   |   |   |   |   |   |   |   |   |   |  |
| Otu1112                                                                                                                                                                                                                                                                                                                                                                                                                                                                                                                                                                                                                                                                                                                                                                                                                   | 0 | 0  | 0 | 0 | 0 | 0 | 0 | 0 | 0 | 0 | 0 | 0 | 0 | 0 | 0 | 0 | 0 | 0 | 0 | 0 | 0 | 0 | 0 | 0 | 0 | 0 | 0 |  |
|                                                                                                                                                                                                                                                                                                                                                                                                                                                                                                                                                                                                                                                                                                                                                                                                                           | 0 | 0  | 0 | 0 | 0 | 0 | 0 | 0 | 0 | 0 | 0 | 0 | 0 | 0 | 0 | 0 | 0 | 0 | 0 | 0 | 0 | 0 | 0 | 0 | 0 | 0 | 0 |  |
|                                                                                                                                                                                                                                                                                                                                                                                                                                                                                                                                                                                                                                                                                                                                                                                                                           | 0 | 0  | 0 | 0 | 0 | 0 | 0 | 0 | 0 | 0 | 0 | 0 | 0 | 0 | 0 | 0 | 0 | 0 | 0 | 0 | 0 | 0 | 0 | 0 | 0 | 0 | 0 |  |
|                                                                                                                                                                                                                                                                                                                                                                                                                                                                                                                                                                                                                                                                                                                                                                                                                           | 0 | 23 | 0 | 0 | 0 | 0 | 0 | 0 | 0 | 0 | 0 | 0 | 0 | 0 | 0 | 0 | 0 | 0 | 0 | 0 | 0 | 0 | 0 | 0 | 0 | 0 | 0 |  |
| M02255_77_000000000-ADUT3_1_1101_18348_11528 T---AC--GT-AG-GTG-----GCG-A-G-----C-G--T--T--AT-C-CGG-AT-----TT-A--C-T--GG-GT-----GT-A----AA-GG-GT-GT-----G-TA-G-G-C-G-----G--G-AC-T-G-C-----<br>-----AA---G-T-C-A-----G-A-T--G-TG--A-AA-AC--T-A-TG-G-G----CT-T-AA-----C-T-C-A-T-A-G--C-C---T-G--C-A--T--T-----T-GA-A-A--C-----T-G-T--GG--T-T-C---T-T-G-A-G-G-G--T-CG---GA-G-G-----G-G-T-T--AC-T-----GG--A--ATT---C-<br>C-C-G-GT--GT-A-G-CG-GT--G---A-A-A---TG-C-GT-AG--AT-A-TC--G-G--G-A-G-G-A-AC-A-CC--GG--T-G--GC-GAA-G--G-C-G-----A-G-T-A-A---CTG--G--AC-G-A-----T-A---C-C-T--GA--CG-C-T-G--A-GA--C-A-CG-A-AA-G-T--G-TG--GG-<br>G--AG-C-A-AA-----CA--GG Bacteria(100);unclassified(100);unclassified(100);unclassified(100);unclassified(100);unclassified(100);unclassified(100);unclassified(100);unclassified(100);   |   |    |   |   |   |   |   |   |   |   |   |   |   |   |   |   |   |   |   |   |   |   |   |   |   |   |   |  |
| Otu1113                                                                                                                                                                                                                                                                                                                                                                                                                                                                                                                                                                                                                                                                                                                                                                                                                   | 0 | 0  | 0 | 0 | 0 | 0 | 0 | 0 | 0 | 0 | 0 | 0 | 0 | 0 | 0 | 0 | 0 | 0 | 0 | 0 | 0 | 0 | 0 | 0 | 0 | 0 | 0 |  |
|                                                                                                                                                                                                                                                                                                                                                                                                                                                                                                                                                                                                                                                                                                                                                                                                                           | 0 | 0  | 0 | 0 | 0 | 0 | 0 | 0 | 0 | 0 | 0 | 0 | 0 | 0 | 0 | 0 | 0 | 0 | 0 | 0 | 0 | 0 | 0 | 0 | 0 | 0 | 0 |  |
|                                                                                                                                                                                                                                                                                                                                                                                                                                                                                                                                                                                                                                                                                                                                                                                                                           | 0 | 0  | 0 | 0 | 0 | 0 | 0 | 0 | 0 | 0 | 0 | 0 | 0 | 0 | 0 | 0 | 0 | 0 | 0 | 0 | 0 | 0 | 0 | 0 | 0 | 0 | 0 |  |
|                                                                                                                                                                                                                                                                                                                                                                                                                                                                                                                                                                                                                                                                                                                                                                                                                           | 0 | 41 | 0 | 0 | 0 | 0 | 0 | 0 | 0 | 0 | 0 | 0 | 0 | 0 | 0 | 0 | 0 | 0 | 0 | 0 | 0 | 0 | 0 | 0 | 0 | 0 | 0 |  |
| M02255_77_000000000-ADUT3_1_1109_17253_13215 T---AC--GA-AG-GGG-----GCT-A-G-----C-G--T--T--GC-T-CGG-AA-----TG-A                                                                                                                                                                                                                                                                                                                                                                                                                                                                                                                                                                                                                                                                                                            |   |    |   |   |   |   |   |   |   |   |   |   |   |   |   |   |   |   |   |   |   |   |   |   |   |   |   |  |



|                                                                                                                                                                                                                         |   |    |   |    |   |   |   |   |   |   |   |   |   |   |   |   |   |   |   |   |   |   |   |   |   |   |   |
|-------------------------------------------------------------------------------------------------------------------------------------------------------------------------------------------------------------------------|---|----|---|----|---|---|---|---|---|---|---|---|---|---|---|---|---|---|---|---|---|---|---|---|---|---|---|
| Otu1115                                                                                                                                                                                                                 | 0 | 0  | 0 | 0  | 0 | 0 | 0 | 0 | 0 | 0 | 0 | 0 | 0 | 0 | 0 | 0 | 0 | 0 | 0 | 0 | 0 | 0 | 0 | 0 | 0 | 0 | 0 |
|                                                                                                                                                                                                                         | 0 | 0  | 0 | 0  | 0 | 0 | 0 | 0 | 0 | 0 | 0 | 0 | 0 | 0 | 0 | 0 | 0 | 0 | 0 | 0 | 0 | 0 | 0 | 0 | 0 | 0 |   |
|                                                                                                                                                                                                                         | 0 | 0  | 0 | 0  | 0 | 0 | 0 | 0 | 0 | 0 | 0 | 0 | 0 | 0 | 0 | 0 | 0 | 0 | 0 | 0 | 0 | 0 | 0 | 0 | 0 | 0 |   |
|                                                                                                                                                                                                                         | 0 | 58 | 0 | 0  | 0 | 0 | 0 | 0 | 0 | 0 | 0 | 0 | 0 | 0 | 0 | 0 | 0 | 0 | 0 | 0 | 0 | 0 | 0 | 0 | 0 | 0 |   |
| M02255_77_000000000-ADUT3_1_1112_21952_10668 T---AC---GT-AG-GGT-----GCA-A-G-----C-G-T--T--AT-C-CGG-AA-----TT-A-T-T--GG-GC-----GT-A----AA-GA-GC-TC-----G-TA-G-G-C-G-----G-T-TT-G-T-C-----                                |   |    |   |    |   |   |   |   |   |   |   |   |   |   |   |   |   |   |   |   |   |   |   |   |   |   |   |
| ----AC---G-C-C-T-----G-G-T--G--TG--A-AA-GT--C-C-AT-C-G-----CT-T-AA-----C-G-G-T-G-G-A-T-C---T-G-C-G---C-C-----G--GG-T-A--C-----G-G-G-CA--G-G-C---T-A-G-A-G-T--G---C-AG---TA-G-G-----G-G-A-G---AT-T-----GG--A--ATT---C-   |   |    |   |    |   |   |   |   |   |   |   |   |   |   |   |   |   |   |   |   |   |   |   |   |   |   |   |
| C-C-G-GT--GT-A-A-CG-GT--G---G--A-A---TG-T-GT-AG--AT-A-TC--G-G--G-A-A-G-A-AC-A-CC---AA--T--G--GC-GAA-G--G-C--A-----G--A-T-C-T---CTG--G--GC-T-G-----T-T---A-C-T--GA--CG-C-T-G--A-GG--A-G-CG-A--AA-G-C---A-TG--GG-         |   |    |   |    |   |   |   |   |   |   |   |   |   |   |   |   |   |   |   |   |   |   |   |   |   |   |   |
| G--AG-C-G-AA-----CA--GG Bacteria(100);Actinobacteria(100);Actinobacteria(100);Actinobacteridae(100);unclassified(100);unclassified(100);unclassified(100);unclassified(100);unclassified(100);                          |   |    |   |    |   |   |   |   |   |   |   |   |   |   |   |   |   |   |   |   |   |   |   |   |   |   |   |
| Otu1116                                                                                                                                                                                                                 | 0 | 0  | 0 | 0  | 0 | 0 | 0 | 0 | 0 | 0 | 0 | 0 | 0 | 0 | 0 | 0 | 0 | 0 | 0 | 0 | 0 | 0 | 0 | 0 | 0 | 0 |   |
|                                                                                                                                                                                                                         | 0 | 0  | 0 | 0  | 0 | 0 | 0 | 0 | 0 | 0 | 0 | 0 | 0 | 0 | 0 | 0 | 0 | 0 | 0 | 0 | 0 | 0 | 0 | 0 | 0 | 0 |   |
|                                                                                                                                                                                                                         | 0 | 0  | 0 | 0  | 0 | 0 | 0 | 0 | 0 | 0 | 0 | 0 | 0 | 0 | 0 | 0 | 0 | 0 | 0 | 0 | 0 | 0 | 0 | 0 | 0 | 0 |   |
|                                                                                                                                                                                                                         | 0 | 60 | 0 | 0  | 0 | 0 | 0 | 0 | 0 | 0 | 0 | 0 | 0 | 0 | 0 | 0 | 0 | 0 | 0 | 0 | 0 | 0 | 0 | 0 | 0 | 0 |   |
| M02255_77_000000000-ADUT3_1_1113_7414_4044 T---AC---GT-AG-GGT-----CCA-A-G-----C-G-T--T--GT-C-CGG-AT-----TT-A-T-T--GG-GC-----GT-A----AA-GA-GC-TC-----G-TA-G-G-C-G-----G-T-TC-G-G-T-----AA--                              |   |    |   |    |   |   |   |   |   |   |   |   |   |   |   |   |   |   |   |   |   |   |   |   |   |   |   |
| --G-T-C-G-----G-G-T--G--TG--A-AA-AC--C-C-CA-G-G-----CT-C-AA-----C-C-T-G-G-G-G-A-----C-G-CC-A--C-T-----C-GA-T-A--C-----T-G-C-TG-TG-A-C---T-T-G-A-G-T--T---C-GG---TA-G-G-----G-G-A-G---CA-C-----GG--A--ATT---C-C-T-G-     |   |    |   |    |   |   |   |   |   |   |   |   |   |   |   |   |   |   |   |   |   |   |   |   |   |   |   |
| GT--GT-A-G-CG-GT--G---A-A-A---TG-C-GC-AG--AT-A-TC--A-G--G-A-G-G-A-AC-A-CC---GG--T--G--GC-GAA-G--G-C--G-----G-T-G-C-T---CTG--G--GC-C-G-----A-A--A-C-T--GA--CG-C-T-G--A-GG--A-G-CG-A--AA-G-C---G-TG--GG-T--AG-            |   |    |   |    |   |   |   |   |   |   |   |   |   |   |   |   |   |   |   |   |   |   |   |   |   |   |   |
| C-A-AA-----CA--GG Bacteria(100);Actinobacteria(100);Actinobacteria(100);Acidimicrobidae(100);Acidimicrobiales(100);Acidimicrobineae(100);unclassified(100);unclassified(100);unclassified(100);                         |   |    |   |    |   |   |   |   |   |   |   |   |   |   |   |   |   |   |   |   |   |   |   |   |   |   |   |
| Otu1117                                                                                                                                                                                                                 | 0 | 0  | 0 | 0  | 0 | 0 | 0 | 0 | 0 | 0 | 0 | 0 | 0 | 0 | 0 | 0 | 0 | 0 | 0 | 0 | 0 | 0 | 0 | 0 | 0 | 0 |   |
|                                                                                                                                                                                                                         | 0 | 0  | 0 | 0  | 0 | 0 | 0 | 0 | 0 | 0 | 0 | 0 | 0 | 0 | 0 | 0 | 0 | 0 | 0 | 0 | 0 | 0 | 0 | 0 | 0 | 0 |   |
|                                                                                                                                                                                                                         | 0 | 0  | 0 | 0  | 0 | 0 | 0 | 0 | 0 | 0 | 0 | 0 | 0 | 0 | 0 | 0 | 0 | 0 | 0 | 0 | 0 | 0 | 0 | 0 | 0 | 0 |   |
|                                                                                                                                                                                                                         | 0 | 36 | 0 | 0  | 0 | 0 | 0 | 0 | 0 | 0 | 0 | 0 | 0 | 0 | 0 | 0 | 0 | 0 | 0 | 0 | 0 | 0 | 0 | 0 | 0 | 0 |   |
| M02255_77_000000000-ADUT3_1_1115_14242_17429 G---AC---GT-AG-GGA-----GCG-A-G-----C-G--T--T--GT-C-CGG-AT-----TC-A--T-T--GG-GC-----GT-A----AA-GC-GC-GC-----G-TA-G-G-C-G-----G-T-TT-G-G-C-----                              |   |    |   |    |   |   |   |   |   |   |   |   |   |   |   |   |   |   |   |   |   |   |   |   |   |   |   |
| -----AA---G-T-C-G-----G-A-T--G--TG--A-AA-TC--C-C-GA-G-G-----CT-C-AA-----C-C-T-C-G-G-G-A-C---T-G--C-A--T-C-----C-GA-T-A--C-----T-G-C--CC--G-A-C---T-A-G-A-G-G-----TAGG---TA-G-G-----G-G-A-G---AT-C-----GG--A--ATT---     |   |    |   |    |   |   |   |   |   |   |   |   |   |   |   |   |   |   |   |   |   |   |   |   |   |   |   |
| C-C-T-G-GT--GT-A-G-CG-GT--G---A-A-A---TG-C-GC-AG--AT-A-TC--A-G--G-A-G-G-A-AC-A-CC---GG--T--G--GC-GAA-G--G-C--G-----GATC-T-----CTG--G--GC-C-T-----T-A--C-C-T--GA--CG-C-T-G--A-GG--C-G-CG-A--AA-G-C---T-AG--              |   |    |   |    |   |   |   |   |   |   |   |   |   |   |   |   |   |   |   |   |   |   |   |   |   |   |   |
| GG-G--AG-C-G-AA-----CA--GG Bacteria(100);Actinobacteria(100);Actinobacteria(100);unclassified(100);unclassified(100);unclassified(100);unclassified(100);unclassified(100);unclassified(100);                           |   |    |   |    |   |   |   |   |   |   |   |   |   |   |   |   |   |   |   |   |   |   |   |   |   |   |   |
| Otu1118                                                                                                                                                                                                                 | 0 | 0  | 0 | 0  | 0 | 0 | 0 | 0 | 0 | 0 | 0 | 0 | 0 | 0 | 0 | 0 | 0 | 0 | 0 | 0 | 0 | 0 | 0 | 0 | 0 | 0 |   |
|                                                                                                                                                                                                                         | 0 | 0  | 0 | 0  | 0 | 0 | 0 | 0 | 0 | 0 | 0 | 0 | 0 | 0 | 0 | 0 | 0 | 0 | 0 | 0 | 0 | 0 | 0 | 0 | 0 | 0 |   |
|                                                                                                                                                                                                                         | 0 | 0  | 0 | 0  | 0 | 0 | 0 | 0 | 0 | 0 | 0 | 0 | 0 | 0 | 0 | 0 | 0 | 0 | 0 | 0 | 0 | 0 | 0 | 0 | 0 | 0 |   |
|                                                                                                                                                                                                                         | 0 | 19 | 0 | 0  | 0 | 0 | 0 | 0 | 0 | 0 | 0 | 0 | 0 | 0 | 0 | 0 | 0 | 0 | 0 | 0 | 0 | 0 | 0 | 0 | 0 | 0 |   |
| M02255_77_000000000-ADUT3_1_1115_11401_19305 T---AC---GA-AG-GGG-----GCT-A-G-----C-G--T--T--GC-T-CGG-AA-----TT-A--C-T--GG-GC-----GT-A----AA-GG-GC-GC-----G-TA-G-G-C-G-----G--C-GC-T-T-C-----                             |   |    |   |    |   |   |   |   |   |   |   |   |   |   |   |   |   |   |   |   |   |   |   |   |   |   |   |
| -----AA---G-T-C-A-----G-G-C--G--TG--A-AA-TT--C-C-TG-G-G-----CT-T-AA-----C-C-T-G-G-G-G-A-C---T-G--C-G---C--T-----T-GA-G-A--C-----T--G-T--GG--T-G-C---T-A-G-A-G-G--T---C-AG---AA-G-A-----G-G-G-T---CG-T-----GG--A--ATT--- |   |    |   |    |   |   |   |   |   |   |   |   |   |   |   |   |   |   |   |   |   |   |   |   |   |   |   |
| C-C-C-A-GT--GT-A-G-AG-GT--G---A-A-A---TT-C-GT-AG--AT-A-TT--G-G--G-A-A-G-A-AC-A-CC---GG--T--G--GC-GAA-G--G-C--G-----G--C-G-A-C---CTG--G--TC-T-G-----A-T---A-C-T--GA--CG-C-T-G--A-GG--C-G-CG-A--CA-G-C---G-TG--           |   |    |   |    |   |   |   |   |   |   |   |   |   |   |   |   |   |   |   |   |   |   |   |   |   |   |   |
| GG-G--AG-C-A-AA-----CA--GG Bacteria(100);Proteobacteria(100);Alphaproteobacteria(100);Rhodospirillales(100);Acetobacteraceae(100);unclassified(100);unclassified(100);unclassified(100);unclassified(100);              |   |    |   |    |   |   |   |   |   |   |   |   |   |   |   |   |   |   |   |   |   |   |   |   |   |   |   |
| Otu1119                                                                                                                                                                                                                 | 0 | 0  | 0 | 0  | 0 | 0 | 0 | 0 | 0 | 0 | 0 | 0 | 0 | 0 | 0 | 0 | 0 | 0 | 0 | 0 | 0 | 0 | 0 | 0 | 0 | 0 |   |
|                                                                                                                                                                                                                         | 0 | 0  | 0 | 0  | 0 | 0 | 0 | 0 | 0 | 0 | 0 | 0 | 0 | 0 | 0 | 0 | 0 | 0 | 0 | 0 | 0 | 0 | 0 | 0 | 0 | 0 |   |
|                                                                                                                                                                                                                         | 0 | 0  | 0 | 0  | 0 | 0 | 0 | 0 | 0 | 0 | 0 | 0 | 0 | 0 | 0 | 0 | 0 | 0 | 0 | 0 | 0 | 0 | 0 | 0 | 0 | 0 |   |
|                                                                                                                                                                                                                         | 0 | 0  | 0 | 29 | 0 | 0 | 0 | 0 | 0 | 0 | 0 | 0 | 0 | 0 | 0 | 0 | 0 | 0 | 0 | 0 | 0 | 0 | 0 | 0 | 0 | 0 |   |
| M02255_77_000000000-ADUT3_1_2102_18172_9200 T---AC---GT-AG-GGG-----GCA-A-G-----C--G--T--T--AT-C-CGG-AT-----TT-A--C-T--GG-GT-----GT--A----AA-GG-GA-GC-----G-TA-G-G-C-G-----G--C-AG-G-G-C-----                            |   |    |   |    |   |   |   |   |   |   |   |   |   |   |   |   |   |   |   |   |   |   |   |   |   |   |   |
| AA---G-T-C-A-----G-A-A--G--TG--A-AA-GC--C-C-GG-G-G-----CT-C-AA-----C-C-C-C-G-G-G-A-C---T-G--C-T---T--T-----T-GA-A-A--C-----T--G-T--CT--T-G-C---T-A-G-A-G-T--A---T-CG---GA-G-A-----G-G-T-A--AG-T-----GG--A--ATT---C-C-T- |   |    |   |    |   |   |   |   |   |   |   |   |   |   |   |   |   |   |   |   |   |   |   |   |   |   |   |
| A-GT--GT-A-G-CG-GT--G---A-A-A---TG-C-GT-AG--AT-A-TT--A-G--G-A-G-G-A-AC-A-CC---AG--T--G--GC-GAA-G--G-C--G-----A--C-T-T-A---CTG--G--AC-G-A-----C-A--A-C-T--GA--CG-C-T-G--A-GG--C-T-CG-A--AA-G-C---G-TG--GG-G--            |   |    |   |    |   |   |   |   |   |   |   |   |   |   |   |   |   |   |   |   |   |   |   |   |   |   |   |
| AG-C-A-AA-----CA--GG Bacteria(100);Firmicutes(100);Clostridia(100);Clostridiales(100);Lachnospiraceae(100);unclassified(100);unclassified(100);unclassified(100);unclassified(100);                                     |   |    |   |    |   |   |   |   |   |   |   |   |   |   |   |   |   |   |   |   |   |   |   |   |   |   |   |



Otu1120 0 0 0 0 0 0 0 0 0 0 0 0 0 0 0 0 0 0 0 0 0 0 0 0 0 0 0 0 0 0  
0 0 0 0 0 0 0 0 0 0 0 0 0 0 0 0 0 0 0 0 0 0 0 0 0 0 0 0 0 0  
0 0 0 0 0 0 0 0 0 0 0 0 0 0 0 0 0 0 0 0 0 0 0 0 0 0 0 0 0 0  
0 26 0 0 0 0 0 0 0 0 0 0 0 0 0 0 0 0 0 0 0 0 0 0 0 0 0 0 0  
M02255\_76\_000000000-ADUNE\_1\_1105\_15937\_6118 .....AC---T-AC-GTG-----CC-A-G-----C-A-G--C--CG-C-GGT-AA-----TA-C-G-T--AG-GT-----GA--C---AA-GC-G--TT-----G---T-C-C-G-----G--T-TC-G-G-T-----AA---G-  
T-C-T-----G-A-T--G--TG--A-AA-GC--C-C-AC-G-G-----CT-C-AA-----C-C-G-T-G-G-A--A-C---G-G--C-A--T--T-----G--GA-A-A--C-----T--G-G--CG--G-A-C---T-T-G-A-A-T--G---T-AG-----CA-G-A-----G-G-A-A--AG-T-----GG--A--ATT---C-C-A-T-GT--  
GT-A-G-CG-GT--G---G--A-A--TG-C-GT-AG--AT-A-TA--T-G--G-A-G-G-A-AC-A-CC---AG--T--G--GC-GAA-A--G-C-G-----A--C-T-T-T--CTG--G--GC-T-A-----T-G---A-T-T--GA--CG-C-T-G--A-GG--C-T-CG-A--AA-G-C---G-TG--GG-G--AG-C-G-  
AA-----CA--GG Bacteria(100);Firmicutes(100);Bacilli(100);Lactobacillales(100);Carnobacteriaceae(100);Alloiococcus(100);unclassified(100);unclassified(100);unclassified(100);

Otu1121 0 0 0 0 0 0 0 0 0 0 0 0 0 0 0 0 0 0 0 0 0 0 0 0 0 0 0 0 0 0  
0 0 0 0 0 0 0 0 0 0 0 0 0 0 0 0 0 0 0 0 0 0 0 0 0 0 0 0 0 0  
0 0 0 0 0 0 0 0 0 0 0 0 0 0 0 0 0 0 0 0 0 0 0 0 0 0 0 0 0 0  
0 16 0 0 0 0 0 0 0 0 0 0 0 0 0 0 0 0 0 0 0 0 0 0 0 0 0 0 0  
M02255\_77\_000000000-ADUT3\_1\_1105\_9137\_14584 C---AC---GT-AG-GGG-----GCA-A-G-----C--G--T---T--GT-C-CGG-AT-----TT-A--C-T--GG-GC-----GT--A---AA-GA-GC-TC-----G-TA-G-G-C-G-----G--T-TC-G-G-C-----AA-  
---G-T-C-G-----G-G-T--G--TG--A-CA-GC--T-C-CA-G-G-----CT-C-AA-----C-C-T-G-GAG-A-----G-G-CC-A--C--T-----C--GA-T-A--C-----T--G-C--TG-TG-A-C---T-A-G-A-G-T--C---C-GG---TA-G-G-----G-G-A-G---CG-T-----GG--A--ATT---C-C-C-G-  
GT--GT-A-G-CG-GT--G---A--A-A--TG-C-GC-AG--AT-A-TC--G-G--G-A-G-G-A-AC-A-CC---AG--C--G--GC-GAA-G--G-C-G-----G--C-G-C-T--CTG--G--GC-C-G-----G-A--A-C-T--GA--CG-C-T-G--A-GG--A-G-CG-A--AA-G-C---G-TG--GG-T--AG-  
C-A-AA-----CA--GG Bacteria(100);Actinobacteria(100);Actinobacteria(100);Acidimicrobidae(100);Acidimicrobiales(100);Acidimicrobineae(100);unclassified(100);unclassified(100);unclassified(100);

Otu1122 0 0 0 0 0 0 0 0 0 0 0 0 0 0 0 0 0 0 0 0 0 0 0 0 0 0 0 0 0 0  
0 0 0 0 0 0 0 0 0 0 0 0 0 0 0 0 0 0 0 0 0 0 0 0 0 0 0 0 0 0  
0 0 0 0 0 0 0 0 0 0 0 0 0 0 0 0 0 0 0 0 0 0 0 0 0 0 0 0 0 0  
0 15 0 0 0 0 0 0 0 0 0 0 0 0 0 0 0 0 0 0 0 0 0 0 0 0 0 0 0  
M02255\_77\_000000000-ADUT3\_1\_2103\_24611\_15304 T---AC---AG-AG-GGG-----GCA-A-G-----C--G--T---T--GT-C-CGG-AA-----TT-A--C-T--GG-GC-----GT--A---AA-GC-GC-GC-----G-CA-G-G-C-G-----G--T-CG-G-C-G---  
-----AT---G-T-G-C-----C-G-T--G--TG--A-CA-GG--C-G-GG-G-G-----CT-C-AA-----C-C-C-C-C-G-AT-T-----G-G--C-A--G-G-----G--TA-G-A--C-----A--C-G--CC--A-A-C---T-T-G-A-G-G--C---A-GG---GA-G-A-----G-G-G-A--TG-T-----GG--A--ATG--  
--C-C-C-G-GT--GG-A-G-CG-GT--G---A--A-A--TG-C-GT-AG--AG-A-TC--G-G--G-C-G-G-A-AC-A-CC---AG--C--G--GC-GAA-G--G-C-G-----G--C-A-T-C--CTG--G--CC-C-T-----G-A--C-C-T--GA--CG-C-T-G--A-GG--C-G-CG-A--GA-G-C---G-TG--  
GG-G--AG-C-G-AA-----CT--GG Bacteria(100);unclassified(100);unclassified(100);unclassified(100);unclassified(100);unclassified(100);unclassified(100);unclassified(100);unclassified(100);

Otu1123 0 0 0 0 0 0 0 0 0 0 0 0 0 0 0 0 0 0 0 0 0 0 0 0 0 0 0 0 0 0  
0 0 0 0 0 0 0 0 0 0 0 0 0 0 0 0 0 0 0 0 0 0 0 0 0 0 0 0 0 0  
0 0 0 0 0 0 0 0 0 0 0 0 0 0 0 0 0 0 0 0 0 0 0 0 0 0 0 0 0 0  
0 9 0 0 0 0 0 0 0 0 0 0 0 0 0 0 0 0 0 0 0 0 0 0 0 0 0 0 0  
M02255\_77\_000000000-ADUT3\_1\_1109\_13946\_18673 T---AC---GT-AG-GGG-----GCA-A-G-----C--G--T---T--GT-C-CGG-AT-----TT-A--T-T--GG-GC-----GT--A---AA-GC-GC-GC-----G-CA-G-G-C-G-----G--C-TT-G-G-T-----  
-----AA---G-T-C-G-----G-C-C--G--TG--A-AA-TC--T-C-CA-G-G-----CT-C-AA-----C-T-T-G-G-A-G--G-----G-GT-C-G---G-G-----C--GA-G-A--C-----T--G-C--CA--G-G-C---T-T-G-A-G-G--T---G-GG---TA-G-A-----G-G-G-C---AG-T-----GG--A--ATT---  
C-C-G-G-GT--GT-A-G-TG-GT--G---G--A-A--TG-C-GT-AG--AG-A-TC--C-G--G-A-G-G-A-AC-A-CC---AG--T--G--GC-GAA-G--G-C-G-----G--C-T-G-C--CTG--G--GC-C-T-----G-G---C-C-T--GA--CG-C-T-G--A-GG--C-G-CG-A--AA-G-C---G-TG--  
GG-G--AG-C-A-AT-----CC--GG Bacteria(100);unclassified(100);unclassified(100);unclassified(100);unclassified(100);unclassified(100);unclassified(100);unclassified(100);unclassified(100);

Otu1124 0 0 0 0 0 0 0 0 0 0 0 0 0 0 0 0 0 0 0 0 0 0 0 0 0 0 0 0 0 0  
0 0 0 0 0 0 0 0 0 0 0 0 0 0 0 0 0 0 0 0 0 0 0 0 0 0 0 0 0 0  
0 0 0 0 0 0 0 0 0 0 0 0 0 0 0 0 0 0 0 0 0 0 0 0 0 0 0 0 0 0  
0 0 49 0 0 0 0 0 0 0 0 0 0 0 0 0 0 0 0 0 0 0 0 0 0 0 0 0 0  
M02255\_76\_000000000-ADUNE\_1\_1101\_12429\_13298 C---TC---CG-TG-CCA-----GCAGCCG-----CG-G--T---A--AT-A-CGG-AG-----GG-T--G-C--AA-GC-----GT--T-----GT-CC-G--GA-----T-TT-A-T-T-G-----G--C-CT-T-G-T-----  
-----AA---G-T-C-C-----G-T-G--G--TG--A-AA-GC--C-T-CC-T-G-----CT-C-AA-----C-A-G-G-A-G-A--A-C---T-G--C-C--A--T-----G--GA-T-A--C-----T--G-C--CG--G-G-C---T-T-G-A-G-T--G---T-AG-----AC-G-A-----G-G-G-T---GG-C-----GG--A--ATA---  
G-A-G-G-CT--GT-A-G-CG-GT--G---A--A-A--TG-C-AT-AG--AT-A-GC--C-T--C-T-A-G-A-AC-C-CC---GA--T--T--GC-GTA-G--G-C-A-----G--C-T-G-C---CTA--G--AC-T-A-----C-A--A-C-T--GA--CA-C-T-G--A-GG--C-A-CG-A--AA-G-C---G-TG--GG-  
G--AG-C-G-AA-----CA--GG Bacteria(100);Bacteroidetes(100);Sphingobacteria(100);Sphingobacteriales(100);unclassified(100);unclassified(100);unclassified(100);unclassified(100);unclassified(100);



|                                                                                                                                                                                                                                                                                                                                                                                                                                                                                                                                                                                                                                        |   |   |    |   |    |    |   |   |   |   |   |   |   |   |   |   |   |   |   |   |   |   |   |   |   |   |   |
|----------------------------------------------------------------------------------------------------------------------------------------------------------------------------------------------------------------------------------------------------------------------------------------------------------------------------------------------------------------------------------------------------------------------------------------------------------------------------------------------------------------------------------------------------------------------------------------------------------------------------------------|---|---|----|---|----|----|---|---|---|---|---|---|---|---|---|---|---|---|---|---|---|---|---|---|---|---|---|
| Otu1125                                                                                                                                                                                                                                                                                                                                                                                                                                                                                                                                                                                                                                | 0 | 0 | 0  | 0 | 0  | 0  | 0 | 0 | 0 | 0 | 0 | 0 | 0 | 0 | 0 | 0 | 0 | 0 | 0 | 0 | 0 | 0 | 0 | 0 | 0 | 0 | 0 |
|                                                                                                                                                                                                                                                                                                                                                                                                                                                                                                                                                                                                                                        | 0 | 0 | 0  | 0 | 0  | 0  | 0 | 0 | 0 | 0 | 0 | 0 | 0 | 0 | 0 | 0 | 0 | 0 | 0 | 0 | 0 | 0 | 0 | 0 | 0 | 0 | 0 |
|                                                                                                                                                                                                                                                                                                                                                                                                                                                                                                                                                                                                                                        | 0 | 0 | 0  | 0 | 0  | 0  | 0 | 0 | 0 | 0 | 0 | 0 | 0 | 0 | 0 | 0 | 0 | 0 | 0 | 0 | 0 | 0 | 0 | 0 | 0 | 0 | 0 |
|                                                                                                                                                                                                                                                                                                                                                                                                                                                                                                                                                                                                                                        | 0 | 0 | 13 | 0 | 0  | 0  | 0 | 0 | 0 | 0 | 0 | 0 | 0 | 0 | 0 | 0 | 0 | 0 | 0 | 0 | 0 | 0 | 0 | 0 | 0 | 0 | 0 |
| M02255_76_000000000-ADUNE_1_1103_15699_9353 .....AC---T-A-CGT-----GCC-A-G-----C--A--G--C--CG-C-GGT-AA-----TA-C-G-T-AG-GG-----GG-C---AA-GC-G-TT-----G---T-C-C-G-----G--A-TT-C-G-T-----CA---G-T-C-C-----G-A-T--G--TG--A-CA-GG--C-C-AC-G-G----CT-C-AA-----C-C-G-T-G-G-A-A-----G-GC-C-A--T-T-----G--GA-A-A--C-----T-G-C-GA--A-A-C---T-T-G-A-G-G-A--C-AG----AA-G-A-----G-G-A-G--AG-T-----GG-A--ATT---C-C-A-C-GT--GT-A-G-CG-GT--G---A--A-A--TG-C-GT-AG--AT-A-TG--T-G--G-A-G-G-A-AC-A-CC--AG--T-G--GC-GAA-G-G-C-G-----A-C-T-C-T---CTG-G--TC-T-G-----T-A--C-C-T--GA--CG-C-T-G-A-GG--T-G-CG-A-AA-G-C--A-TG--GG-G--AG-C-A-AA-----CA--GG          |   |   |    |   |    |    |   |   |   |   |   |   |   |   |   |   |   |   |   |   |   |   |   |   |   |   |   |
| Bacteria(100);Firmicutes(100);Bacilli(100);Bacillales(100);unclassified(100);unclassified(100);unclassified(100);unclassified(100);unclassified(100);                                                                                                                                                                                                                                                                                                                                                                                                                                                                                  |   |   |    |   |    |    |   |   |   |   |   |   |   |   |   |   |   |   |   |   |   |   |   |   |   |   |   |
| Otu1126                                                                                                                                                                                                                                                                                                                                                                                                                                                                                                                                                                                                                                | 0 | 0 | 0  | 0 | 0  | 0  | 0 | 0 | 0 | 0 | 0 | 0 | 0 | 0 | 0 | 0 | 0 | 0 | 0 | 0 | 0 | 0 | 0 | 0 | 0 | 0 | 0 |
|                                                                                                                                                                                                                                                                                                                                                                                                                                                                                                                                                                                                                                        | 0 | 0 | 0  | 0 | 0  | 0  | 0 | 0 | 0 | 0 | 0 | 0 | 0 | 0 | 0 | 0 | 0 | 0 | 0 | 0 | 0 | 0 | 0 | 0 | 0 | 0 | 0 |
|                                                                                                                                                                                                                                                                                                                                                                                                                                                                                                                                                                                                                                        | 0 | 0 | 0  | 0 | 0  | 0  | 0 | 0 | 0 | 0 | 0 | 0 | 0 | 0 | 0 | 0 | 0 | 0 | 0 | 0 | 0 | 0 | 0 | 0 | 0 | 0 | 0 |
|                                                                                                                                                                                                                                                                                                                                                                                                                                                                                                                                                                                                                                        | 0 | 0 | 20 | 0 | 0  | 0  | 0 | 0 | 0 | 0 | 0 | 0 | 0 | 0 | 0 | 0 | 0 | 0 | 0 | 0 | 0 | 0 | 0 | 0 | 0 | 0 | 0 |
| M02255_76_000000000-ADUNE_1_1104_17697_8025 T---A---AC-TC-CGT-----GCC-A-G-----C---A--G--CC-G-CGG-TA-----AT-A-C-G--GA-GG-----GT-G---CA--A-GC-G-----T-TG-T-T-C-G-----G--A-TT-G-A-T-----AA---G-T-C-A-----G-A-T--G--TG--A-AA-GC--C-C-AC-G-G----CT-T-AA-----C-C-G-T-G-G-A-A-G---T-G--C-A--T-T-----T--GA-T-A--C-----T-G-T-CA--G-A-C---T-T-G-A-G-T-A--C-CA---GA-G-G-----G-G-A-A--AG-T-----GG-A--ATT---C-C-C-G-GT--GT-A-G-AG-GT--G---A--A-A--TT-C-GT-AG--AT-A-TC--G-G--G-A-G-G-A-AT-A-CC--GG--T-G--GC-GAA-G-G-C-G-----A-C-T-T-T---CTG-G--CT-G-G-----A-T--A-C-T--GA--CG-C-T-G-A-GG--C-G-CG-A-AA-G-C--G-TG--GG-G--AG-C-A-AA-----CA--GG           |   |   |    |   |    |    |   |   |   |   |   |   |   |   |   |   |   |   |   |   |   |   |   |   |   |   |   |
| Bacteria(100);Proteobacteria(100);Deltaproteobacteria(100);Desulfobacterales(100);Desulfobulbaceae(100);Desulfobulbus(100);unclassified(100);unclassified(100);unclassified(100);                                                                                                                                                                                                                                                                                                                                                                                                                                                      |   |   |    |   |    |    |   |   |   |   |   |   |   |   |   |   |   |   |   |   |   |   |   |   |   |   |   |
| Otu1127                                                                                                                                                                                                                                                                                                                                                                                                                                                                                                                                                                                                                                | 0 | 0 | 0  | 0 | 0  | 0  | 0 | 0 | 0 | 0 | 0 | 0 | 0 | 0 | 0 | 0 | 0 | 0 | 0 | 0 | 0 | 0 | 0 | 0 | 0 | 0 | 0 |
|                                                                                                                                                                                                                                                                                                                                                                                                                                                                                                                                                                                                                                        | 0 | 0 | 0  | 0 | 0  | 0  | 0 | 0 | 0 | 0 | 0 | 0 | 0 | 0 | 0 | 0 | 0 | 0 | 0 | 0 | 0 | 0 | 0 | 0 | 0 | 0 | 0 |
|                                                                                                                                                                                                                                                                                                                                                                                                                                                                                                                                                                                                                                        | 0 | 0 | 0  | 0 | 0  | 0  | 0 | 0 | 0 | 0 | 0 | 0 | 0 | 0 | 0 | 0 | 0 | 0 | 0 | 0 | 0 | 0 | 0 | 0 | 0 | 0 | 0 |
|                                                                                                                                                                                                                                                                                                                                                                                                                                                                                                                                                                                                                                        | 0 | 0 | 0  | 0 | 0  | 20 | 0 | 0 | 0 | 0 | 0 | 0 | 0 | 0 | 0 | 0 | 0 | 0 | 0 | 0 | 0 | 0 | 0 | 0 | 0 | 0 | 0 |
| M02255_77_000000000-ADUT3_1_1102_27155_20332 T---AC--GG-AG-GGG-----GCT-A-G-----C--G--T---T--GT-T-CGG-AA-----TT-A--C-T--GG-GC-----GT--A---AA-GC-GC-AC-----G-TA-G-G-C-G-----G--C-TG-T-T-C-----AA---G-T-C-A-----G-A-G--G--TG--A-AA-GC--C-C-GG-G-G----CT-C-AA-----C-C-C-C-G-G-A-A-T---A-G--C-C--T-T-----T--GA-G-A--C-----T-G-G--AT--A-G-C---T-T-G-A-A-T-C---T-TG---GA-G-A-----G-G-C-G--AG-T-----GG-A--ATT---C-C-G-A-GT--GT-A-G-AG-GT--G---A--A-A--TT-C-GT-AG--AT-A-TT--C-G--G-A-A-G-A-AC-A-CC--AG--T-G--GC-GAA-G-G-C-G-----G--C-T-C-G---CTG-G--AC-A-A-----G-T--A-T-T--GA--CG-C-T-G-A-GG--T-G-CG-A-AA-G-C--G-TG--GG-G--AG-C-A-AA-----CA--GG |   |   |    |   |    |    |   |   |   |   |   |   |   |   |   |   |   |   |   |   |   |   |   |   |   |   |   |
| Bacteria(100);Proteobacteria(100);Alphaproteobacteria(100);Sphingomonadales(100);Sphingomonadaceae(100);Sphingobium(100);unclassified(100);unclassified(100);unclassified(100);                                                                                                                                                                                                                                                                                                                                                                                                                                                        |   |   |    |   |    |    |   |   |   |   |   |   |   |   |   |   |   |   |   |   |   |   |   |   |   |   |   |
| Otu1128                                                                                                                                                                                                                                                                                                                                                                                                                                                                                                                                                                                                                                | 0 | 0 | 0  | 0 | 0  | 0  | 0 | 0 | 0 | 0 | 0 | 0 | 0 | 0 | 0 | 0 | 0 | 0 | 0 | 0 | 0 | 0 | 0 | 0 | 0 | 0 | 0 |
|                                                                                                                                                                                                                                                                                                                                                                                                                                                                                                                                                                                                                                        | 0 | 0 | 0  | 0 | 0  | 0  | 0 | 0 | 0 | 0 | 0 | 0 | 0 | 0 | 0 | 0 | 0 | 0 | 0 | 0 | 0 | 0 | 0 | 0 | 0 | 0 | 0 |
|                                                                                                                                                                                                                                                                                                                                                                                                                                                                                                                                                                                                                                        | 0 | 0 | 0  | 0 | 0  | 0  | 0 | 0 | 0 | 0 | 0 | 0 | 0 | 0 | 0 | 0 | 0 | 0 | 0 | 0 | 0 | 0 | 0 | 0 | 0 | 0 | 0 |
|                                                                                                                                                                                                                                                                                                                                                                                                                                                                                                                                                                                                                                        | 0 | 0 | 0  | 0 | 32 | 0  | 0 | 0 | 0 | 0 | 0 | 0 | 0 | 0 | 0 | 0 | 0 | 0 | 0 | 0 | 0 | 0 | 0 | 0 | 0 | 0 | 0 |
| M02255_77_000000000-ADUT3_1_2109_23997_11059 T---AC--AG-AG-GTC-----TCA-A-G-----C--G--T---T--GT-T-CGG-AT-----TC-A--T                                                                                                                                                                                                                                                                                                                                                                                                                                                                                                                    |   |   |    |   |    |    |   |   |   |   |   |   |   |   |   |   |   |   |   |   |   |   |   |   |   |   |   |



|         |                                                                                                                                                                                                                             |   |   |   |   |    |   |   |   |    |   |   |   |   |   |   |   |   |   |   |   |   |   |   |   |   |   |  |
|---------|-----------------------------------------------------------------------------------------------------------------------------------------------------------------------------------------------------------------------------|---|---|---|---|----|---|---|---|----|---|---|---|---|---|---|---|---|---|---|---|---|---|---|---|---|---|--|
| Otu1130 | 0                                                                                                                                                                                                                           | 0 | 0 | 0 | 0 | 0  | 0 | 0 | 0 | 0  | 0 | 0 | 0 | 0 | 0 | 0 | 0 | 0 | 0 | 0 | 0 | 0 | 0 | 0 | 0 | 0 | 0 |  |
|         | 0                                                                                                                                                                                                                           | 0 | 0 | 0 | 0 | 0  | 0 | 0 | 0 | 0  | 0 | 0 | 0 | 0 | 0 | 0 | 0 | 0 | 0 | 0 | 0 | 0 | 0 | 0 | 0 | 0 |   |  |
|         | 0                                                                                                                                                                                                                           | 0 | 0 | 0 | 0 | 0  | 0 | 0 | 0 | 0  | 0 | 0 | 0 | 0 | 0 | 0 | 0 | 0 | 0 | 0 | 0 | 0 | 0 | 0 | 0 | 0 |   |  |
|         | 0                                                                                                                                                                                                                           | 0 | 0 | 0 | 0 | 45 | 0 | 0 | 0 | 0  | 0 | 0 | 0 | 0 | 0 | 0 | 0 | 0 | 0 | 0 | 0 | 0 | 0 | 0 | 0 |   |   |  |
|         | M02255_77_000000000-ADUT3_1_1101_26799_17371 T---AC---GA-GG-GAT-----CCT-A-G-----C--G--T---T-GT-T-CGG-AA-----TT-A--T-T--GG-GC-----GT--A----AA-GC-GT-GT-----G-TA-G-G-C-G-----G--C-TT-T-G-C-----                               |   |   |   |   |    |   |   |   |    |   |   |   |   |   |   |   |   |   |   |   |   |   |   |   |   |   |  |
|         | -----AA---G-T-C-A-----G-T-T--G--TG--A-AA-GC--C-C-CG-G-G----CT-C-AA-----C-C-C-G-G-G-A--A-G---T-G--C-T---T--C-----T--GA-T-A--C-----T--G-C--TA--A-G-C---T-T-G-A-G-T-A--C-TG----GA-G-A-----G-G-A-T---AG-T-----GG--A--ATT---C-   |   |   |   |   |    |   |   |   |    |   |   |   |   |   |   |   |   |   |   |   |   |   |   |   |   |   |  |
|         | C-A-G-GT--GT-A-G-TG-GT--G---A--A-A---TA-C-GT-AG--AT-A-TC--T-G--G-A-G-G-A-AC-A-CC---GG--T--G--GC-GAA-G--G-C--G-----G--C-T-A-T---CTG--G--CC-A-T-----G-T---A-C-T--GA--CG-C-T-G--A-GA--C-A-CG-A--AA-G-C---G-TG--GG-G-           |   |   |   |   |    |   |   |   |    |   |   |   |   |   |   |   |   |   |   |   |   |   |   |   |   |   |  |
|         | -AG-C-A-AA-----CA--GG Bacteria(100);Proteobacteria(100);unclassified(100);unclassified(100);unclassified(100);unclassified(100);unclassified(100);unclassified(100);unclassified(100);                                      |   |   |   |   |    |   |   |   |    |   |   |   |   |   |   |   |   |   |   |   |   |   |   |   |   |   |  |
| Otu1131 | 0                                                                                                                                                                                                                           | 0 | 0 | 0 | 0 | 0  | 0 | 0 | 0 | 0  | 0 | 0 | 0 | 0 | 0 | 0 | 0 | 0 | 0 | 0 | 0 | 0 | 0 | 0 | 0 | 0 |   |  |
|         | 0                                                                                                                                                                                                                           | 0 | 0 | 0 | 0 | 0  | 0 | 0 | 0 | 0  | 0 | 0 | 0 | 0 | 0 | 0 | 0 | 0 | 0 | 0 | 0 | 0 | 0 | 0 | 0 | 0 |   |  |
|         | 0                                                                                                                                                                                                                           | 0 | 0 | 0 | 0 | 0  | 0 | 0 | 0 | 0  | 0 | 0 | 0 | 0 | 0 | 0 | 0 | 0 | 0 | 0 | 0 | 0 | 0 | 0 | 0 | 0 |   |  |
|         | 0                                                                                                                                                                                                                           | 0 | 0 | 0 | 0 | 22 | 0 | 0 | 0 | 0  | 0 | 0 | 0 | 0 | 0 | 0 | 0 | 0 | 0 | 0 | 0 | 0 | 0 | 0 | 0 | 0 |   |  |
|         | M02255_77_000000000-ADUT3_1_1104_15379_15781 T---AC---GT-AG-GGA-----GCG-A-G-----C--G--T---T--AT-C-CGG-AT-----TC-A--T-T--GG-GC-----GT--A----AA-GC-GC-GC-----G-TA-G-G-C-G-----G--C-CC-G-T-C-----                              |   |   |   |   |    |   |   |   |    |   |   |   |   |   |   |   |   |   |   |   |   |   |   |   |   |   |  |
|         | -----AA---G-C-G-G-----G-G-T-T--TC--A-AA-TC--C-A-GG-G-G----CT-C-AA-----C-C-T-C-T-G-G--C-----C-G--G-A--C--C-----C--CG-A-A--C-----T--G-G--CG--G-G-C---T-C-G-A-G-T-G--C-GG----TA-G-A-----G-G-A-A--GG-T-----GG--A--ATT---        |   |   |   |   |    |   |   |   |    |   |   |   |   |   |   |   |   |   |   |   |   |   |   |   |   |   |  |
|         | C-C-C-A-GT--GT-A-G-CG-GT--G---A--A-A---TG-C-GC-AG--AT-A-TT--G-G--G-A-A-G-A-AC-A-CC---GA--T--G--GC-GAA-G--G-C--A-----G--C-C-T-T---CTG--G--GC-C-G-----C-C---A-C-T--GA--CG-C-T-G--A-GG--C-G-CG-A--AA-G-C---T-AG--              |   |   |   |   |    |   |   |   |    |   |   |   |   |   |   |   |   |   |   |   |   |   |   |   |   |   |  |
|         | GG-G--AG-C-G-AA-----CA--GG Bacteria(100);Actinobacteria(100);Actinobacteria(100);Coriobacteridae(100);Coriobacteriales(100);Coriobacterineae(100);Coriobacteriaceae(100);unclassified(100);unclassified(100);               |   |   |   |   |    |   |   |   |    |   |   |   |   |   |   |   |   |   |   |   |   |   |   |   |   |   |  |
| Otu1132 | 0                                                                                                                                                                                                                           | 0 | 0 | 0 | 0 | 0  | 0 | 0 | 0 | 0  | 0 | 0 | 0 | 0 | 0 | 0 | 0 | 0 | 0 | 0 | 0 | 0 | 0 | 0 | 0 | 0 |   |  |
|         | 0                                                                                                                                                                                                                           | 0 | 0 | 0 | 0 | 0  | 0 | 0 | 0 | 0  | 0 | 0 | 0 | 0 | 0 | 0 | 0 | 0 | 0 | 0 | 0 | 0 | 0 | 0 | 0 | 0 |   |  |
|         | 0                                                                                                                                                                                                                           | 0 | 0 | 0 | 0 | 0  | 0 | 0 | 0 | 0  | 0 | 0 | 0 | 0 | 0 | 0 | 0 | 0 | 0 | 0 | 0 | 0 | 0 | 0 | 0 | 0 |   |  |
|         | 0                                                                                                                                                                                                                           | 0 | 0 | 0 | 0 | 20 | 0 | 0 | 0 | 0  | 0 | 0 | 0 | 0 | 0 | 0 | 0 | 0 | 0 | 0 | 0 | 0 | 0 | 0 | 0 | 0 |   |  |
|         | M02255_77_000000000-ADUT3_1_1115_9114_17629 T---AC---GT-AG-GGT-----CCA-A-G-----C--G--T---T--GT-C-CGG-AT-----TT-A--T-T--GG-GC-----GT--A----AA-GA-GC-TC-----G-TA-G-G-C-G-----G--C-TC-A-G-T-----AA--                           |   |   |   |   |    |   |   |   |    |   |   |   |   |   |   |   |   |   |   |   |   |   |   |   |   |   |  |
|         | --G-T-C-G-----G-A-T-G--TG--A-AA-AC--T-C-CA-G-G----CT-C-AA-----C-C-T-G-G-A-G--A-----C-G-CC-A--T--T-----C--GA-T-A--C-----T--G-C--TG-TG-G-C---T-T-G-A-G-T--C---T-GG----TA-G-G-----G-G-A-G---CA-C-----GG--A--ATT---C-C-T-G-     |   |   |   |   |    |   |   |   |    |   |   |   |   |   |   |   |   |   |   |   |   |   |   |   |   |   |  |
|         | GT--GT-A-G-CG-GT--G---A--A-A---TG-C-GC-AG--AT-A-TC--A-G--G-A-G-G-A-AC-A-CC---GG--T--G--GC-GAA-G--G-C--G-----G--T-G-C-T---CTG--G--GC-C-A-----G-T---A-C-T--GA--CG-C-T-G--A-GG--A-G-CG-A--AA-G-C---G-TG--GG-G--AG-             |   |   |   |   |    |   |   |   |    |   |   |   |   |   |   |   |   |   |   |   |   |   |   |   |   |   |  |
|         | C-A-AA-----CA--GG Bacteria(100);Actinobacteria(100);Actinobacteria(100);unclassified(100);unclassified(100);unclassified(100);unclassified(100);unclassified(100);unclassified(100);                                        |   |   |   |   |    |   |   |   |    |   |   |   |   |   |   |   |   |   |   |   |   |   |   |   |   |   |  |
| Otu1133 | 0                                                                                                                                                                                                                           | 0 | 0 | 0 | 0 | 0  | 0 | 0 | 0 | 0  | 0 | 0 | 0 | 0 | 0 | 0 | 0 | 0 | 0 | 0 | 0 | 0 | 0 | 0 | 0 | 0 |   |  |
|         | 0                                                                                                                                                                                                                           | 0 | 0 | 0 | 0 | 0  | 0 | 0 | 0 | 0  | 0 | 0 | 0 | 0 | 0 | 0 | 0 | 0 | 0 | 0 | 0 | 0 | 0 | 0 | 0 | 0 |   |  |
|         | 0                                                                                                                                                                                                                           | 0 | 0 | 0 | 0 | 0  | 0 | 0 | 0 | 0  | 0 | 0 | 0 | 0 | 0 | 0 | 0 | 0 | 0 | 0 | 0 | 0 | 0 | 0 | 0 | 0 |   |  |
|         | 0                                                                                                                                                                                                                           | 0 | 0 | 0 | 0 | 5  | 0 | 0 | 0 | 15 | 0 | 0 | 0 | 0 | 0 | 0 | 0 | 0 | 0 | 0 | 0 | 0 | 0 | 0 | 0 | 0 |   |  |
|         | M02255_77_000000000-ADUT3_1_2109_24060_18276 T---AC---GT-AG-GGG-----GCA-A-G-----C--G--T---T--AT-C-CGG-AT-----TT-A--C-T--GG-GT-----GT--A----AA-GG-GA-GC-----G-TA-G-A-C-G-----G--C-AG-T-G-C-----                              |   |   |   |   |    |   |   |   |    |   |   |   |   |   |   |   |   |   |   |   |   |   |   |   |   |   |  |
|         | -----AA---G-T-C-T-----G-A-A--G--TG--A-AA-TG--C-A-TG-G-G----CT-C-AA-----C-T-C-A-T-G-A--A-C---T-G--C-T---T--T-----G--GA-A-A--C-----T--G-T--AC--A-G-C---T-A-G-A-G-T-A--C-CG----GA-G-G-----G-G-T-A---AG-C-----GG--A--ATT---     |   |   |   |   |    |   |   |   |    |   |   |   |   |   |   |   |   |   |   |   |   |   |   |   |   |   |  |
|         | C-C-T-G-GT--GT-A-G-CG-GT--G---A--A-A---TG-C-GT-AG--AT-A-TC--A-G--G-A-G-G-A-AC-A-CC---GG--T--G--GC-GAA-G--G-C--G-----G--C-T-T-A---CTG--G--AC-G-G-----A-A---A-C-T--GA--CG-T-T-A--A-GG--C-T-CG-A--AA-G-C---G-TG--              |   |   |   |   |    |   |   |   |    |   |   |   |   |   |   |   |   |   |   |   |   |   |   |   |   |   |  |
|         | GG-G--AG-C-A-AA-----CA--GG Bacteria(100);Firmicutes(100);Clostridia(100);Clostridiales(100);Lachnospiraceae(100);unclassified(100);unclassified(100);unclassified(100);unclassified(100);                                   |   |   |   |   |    |   |   |   |    |   |   |   |   |   |   |   |   |   |   |   |   |   |   |   |   |   |  |
| Otu1134 | 0                                                                                                                                                                                                                           | 0 | 0 | 0 | 0 | 0  | 0 | 0 | 0 | 0  | 0 | 0 | 0 | 0 | 0 | 0 | 0 | 0 | 0 | 0 | 0 | 0 | 0 | 0 | 0 | 0 |   |  |
|         | 0                                                                                                                                                                                                                           | 0 | 0 | 0 | 0 | 0  | 0 | 0 | 0 | 0  | 0 | 0 | 0 | 0 | 0 | 0 | 0 | 0 | 0 | 0 | 0 | 0 | 0 | 0 | 0 | 0 |   |  |
|         | 0                                                                                                                                                                                                                           | 0 | 0 | 0 | 0 | 0  | 0 | 0 | 0 | 0  | 0 | 0 | 0 | 0 | 0 | 0 | 0 | 0 | 0 | 0 | 0 | 0 | 0 | 0 | 0 | 0 |   |  |
|         | 0                                                                                                                                                                                                                           | 0 | 0 | 0 | 0 | 0  | 4 | 0 | 0 | 0  | 0 | 0 | 0 | 0 | 0 | 0 | 0 | 0 | 0 | 0 | 0 | 0 | 0 | 0 | 0 | 0 |   |  |
|         | M02255_76_000000000-ADUNE_1_1105_12564_18328 C---GG---CT-AA-CTC-----CGT-G-C-----C--A--G---C--AG-C-CGC-GG-----TA-A--T-A--CG-GA-----GG--A----TC-CG-AG-CG-----T-TA-T-C-C-G-----GA-C-CT-A-T-T-----                              |   |   |   |   |    |   |   |   |    |   |   |   |   |   |   |   |   |   |   |   |   |   |   |   |   |   |  |
|         | -----AA---G-T-C-A-----G-G-G--G--TG--A-AA-GA--C-G-GC-A-G----CT-C-AA-----C-T-G-T-C-G-C--A-G---T-G--C-C---T--T-----T--GA-T-A--C-----T--G-A--TG--G-G-C---T-T-G-A-A-T--G---C-AG----CT-G-A-----G-G-T-A---GG-C-----GG--A--ATG---T- |   |   |   |   |    |   |   |   |    |   |   |   |   |   |   |   |   |   |   |   |   |   |   |   |   |   |  |
|         | G-A-C-AA--GT-A-G-CG-GT--G---A--A-A---TG-C-AT-AG--AT-A-TG--T-C--A-C-A-G-A-AC-A-CC---GA--T--T--GC-GAA-G--G-C--A-----G--C-T-T-A---CTA--A--AG-T-G-----C-G---A-T-T--GA--CG-C-T-G--A-GG--C-A-CG-A--AA-G-C---G-TG--GG-G-           |   |   |   |   |    |   |   |   |    |   |   |   |   |   |   |   |   |   |   |   |   |   |   |   |   |   |  |
|         | -AT-C-A-AA-----CA--GG Bacteria(100);Bacteroidetes(100);Sphingobacteria(100);Sphingobacteriales(100);Sphingobacteriaceae(100);Sphingobacteriaceae(100);unclassified(100);unclassified(100);unclassified(100);                |   |   |   |   |    |   |   |   |    |   |   |   |   |   |   |   |   |   |   |   |   |   |   |   |   |   |  |



Otu1135      0      0      0      0      0      0      0      0      0      0      0      0      0      0      0      0      0      0      0      0      0      0      0      0      0      0      0  
0      0      0      0      0      0      0      0      0      0      0      0      0      0      0      0      0      0      0      0      0      0      0      0      0      0      0      0  
0      0      0      0      0      0      0      0      0      0      0      0      0      0      0      0      0      0      0      0      0      0      0      0      0      0      0      0  
0      0      0      0      0      0      8      0      0      0      0      0      0      0      0      0      0      0      0      0      0      0      0      0      0      0      0      0  
M02255\_77\_000000000-ADUT3\_1\_1102\_6707\_10670 T---AC---GA-GG-GGG-----GCA-A-G-----C-G-T---T-GT-T-CGG-AA-----TT-A-T-T-GG-GC-----GT-A---AA-GG-GT-GC-----G-TA-G-G-C-G-----G-T-TT-G-A-T-----  
AA---G-T-C-A-----T-C-T--G--TG--A-AA-TC--T-C-TG-G-G----CT-C-AA-----C-C-C-A-G-A-G-T-C---T-G-C-A--G-G-----C-GA-A-A--C-----T-G-T--CG--G-G-C---T-T-G-A-G-T-A--T-GG----GA-G-A-----G-G-T-G--AG-T-----GG--A-ATT---T-C-C-  
G-GT--GT-A-G-CG-GT--G---A-A-A--TG-C-GT-AG--AT-A-TC--G-G--A-A-G-G-A-AC-A-CC--TG--T--G--GC-GAA-A--G-C-G-----G--C-T-C-A--CTG--G--AC-C-A-----T-A--A-C-T--GA--CG-C-T-G--A-TG--C-A-CG-A--AA-G-C---T-AG--GG-G--  
AG-C-A-AA-----CA--GG      Bacteria(100);Acidobacteria(100);Acidobacteria(100);Acidobacteriales(100);Acidobacteriaceae(100);Edaphobacter(100);unclassified(100);unclassified(100);unclassified(100);

Otu1136      0      0      0      0      0      0      0      0      0      0      0      0      0      0      0      0      0      0      0      0      0      0      0      0      0      0      0  
0      0      0      0      0      0      0      0      0      0      0      0      0      0      0      0      0      0      0      0      0      0      0      0      0      0      0      0  
0      0      0      0      0      0      0      0      0      0      0      0      0      0      0      0      0      0      0      0      0      0      0      0      0      0      0      0  
0      0      0      0      103      0      0      0      0      0      0      0      0      0      0      0      0      0      0      0      0      0      0      0      0      0      0      0  
M02255\_77\_000000000-ADUT3\_1\_1107\_16510\_19043      T---AC---GT-AG-GAT-----GCA-A-G-----C-G-T---T-GT-C-CGG-AT-----TT-A-T-T-GG-GC-----GT-A---AA-GC-GA-AC-----G-TA-G-G-C-G-----G--C-TT-C-T-T-----  
-----AA---G-T-T-T-----G-G-T--C--TT--A-AA-GA--C-C-GG-G-G----CT-C-AA-----C-C-C-C-G-G-G--A-A---T-G-G-A--C--T-----G-AA-T-A--C-----T-G-G-GA--G-G-C---T-A-G-A-G-G-A--T-GT----CA-G-A-----G-G-A-A--AG-T-----GG--A-ATT---C-  
C-T-A-GT--GT-A-G-CG-GT--G---A-A-A--TG-C-GT-AG--AT-A-TT--A-G--G-A-G-G-A-AC-A-CC--AG--T--G--GC-GAA-A--G-C-G-----A-C-T-T-T--CTG--G--GA-C-A-----T-T--T-C-T--GA--CG-C-T-G--A-GG--T-T-CG-A--AA-G-C---T-CG--GG-G--  
AG-C-A-AA-----CA--GG      Bacteria(100);unclassified(100);unclassified(100);unclassified(100);unclassified(100);unclassified(100);unclassified(100);unclassified(100);unclassified(100);

Otu1137      0      0      0      0      0      0      0      0      0      0      0      0      0      0      0      0      0      0      0      0      0      0      0      0      0      0      0  
0      0      0      0      0      0      0      0      0      0      0      0      0      0      0      0      0      0      0      0      0      0      0      0      0      0      0      0  
0      0      0      0      0      0      0      0      0      0      0      0      0      0      0      0      0      0      0      0      0      0      0      0      0      0      0      0  
0      0      0      0      0      0      103      0      0      0      0      0      0      0      0      0      0      0      0      0      0      0      0      0      0      0      0  
M02255\_77\_000000000-ADUT3\_1\_1103\_18170\_10056      T---AC---GG-AG-GGA-----GCG-A-G-----C-G--T---T-GT-T-CGG-AA-----TT-A--C-T--GG-GC-----GT-A---AA-GC-GT-AT-----G-TA-G-G-C-G-----G--T-TT-T-G-T-----  
-----AA---G-A-C-A-----G-A-T--G--TG--A-AA-TC--C-C-AG-A-G----CT-T-AA-----C-T-T-T-G-G-A--A-C---T-G--C-A--T--T-----T-GT-G-A--C-----T-G-C--AT--G-A-C---T-C-G-A-G-T-A--T-TG----GA-G-A-----G-G-T-T--GG-C-----GG--A-ATT---C-  
C-T-A-GT--GT-A-G-CA-GT--G---A-A-A--TG-C-GC-AG--AT-A-TT--A-G--G-A-G-G-A-AC-A-CC--GA--T--G--GC-GTA-A--G-C-A-----G--C-C-A-A--CTG--G--AC-A-A-----T-T--A-C-T--GA--CG-C-T-G--A-GA--T-A-CG-A--AA-G-T---A-TG--GG-G-  
-AG-C-A-AA-----CA--GG      Bacteria(100);unclassified(100);unclassified(100);unclassified(100);unclassified(100);unclassified(100);unclassified(100);unclassified(100);unclassified(100);

Otu1138      0      0      0      0      0      0      0      0      0      0      0      0      0      0      0      0      0      0      0      0      0      0      0      0      0      0      0  
0      0      0      0      0      0      0      0      0      0      0      0      0      0      0      0      0      0      0      0      0      0      0      0      0      0      0      0  
0      0      0      0      0      0      0      0      0      0      0      0      0      0      0      0      0      0      0      0      0      0      0      0      0      0      0      0  
0      0      0      0      0      0      4      0      0      0      0      0      0      0      0      0      0      0      0      0      0      0      0      0      0      0      0      0  
M02255\_77\_000000000-ADUT3\_1\_1109\_8906\_23133 T---AC---GT-AG-GGG-----GCG-A-G-----C-G--T---T-GT-C-CGG-AA-----TG-A-T-T-GG-GC-----GT-A---AA-GG-GC-GC-----G-TA-G-G-C-G-----G--C-TT-A-T-C-----  
AA---G-T-C-T-----G-G-A--G--TG--G-AA-GT--C-C-TA-T-T----TT-C-AA-----G-G-T-A-G-G-A--A-T---T-G--C-T---T--T-----G--GA-A-A--C-----T--G-G--TA--A-G-C---T-T-G-A-G-T--G--C-AG----GA-G-A-----G-G-T-C--AT-C-----GG--A-ATT---C-C-C-  
G-GT--GT-A-G-CG-GT--G---A-A-A--TG-C-GT-AG--AG-A-TC--G-G--G-A-G-G-A-AC-A-CC--AG--T--G--GC-GAA-G--G-C-G-----G--G-T-G-A--CTG--G--AC-T-G-----C-A--A-C-T--GA--CG-C-T-G--A-GG--C-G-CG-A--AA-G-T---G-TG--GG-G--  
AG-C-A-AA-----CA--GG      Bacteria(100);Firmicutes(100);unclassified(100);unclassified(100);unclassified(100);unclassified(100);unclassified(100);unclassified(100);unclassified(100);

Otu1139      0      0      0      0      0      0      0      0      0      0      0      0      0      0      0      0      0      0      0      0      0      0      0      0      0      0      0  
0      0      0      0      0      0      0      0      0      0      0      0      0      0      0      0      0      0      0      0      0      0      0      0      0      0      0      0  
0      0      0      0      0      0      0      0      0      0      0      0      0      0      0      0      0      0      0      0      0      0      0      0      0      0      0      0  
0      0      0      0      0      0      15      0      0      0      0      0      0      0      0      0      0      0      0      0      0      0      0      0      0      0      0      0  
M02255\_77\_000000000-ADUT3\_1\_1110\_24127\_15812      T---AC---GG-AG-GGA-----GCT-A-G-----C-G--T---T-GT-T-CGG-AA-----TT-A--C-T--GG-GC-----GT-A---AA-GC-GC-AC-----G-TA-G-G-C-G-----G--T-CA-G-C-C-----  
-----AA---G-T-C-A-----G-A-G--G--TG--A-AA-GC--C-C-GG-A-G----CT-C-AA-----C-T-T-C-G-G-A--A-C---T-G--C-C---T--T-----T--GA-A-A--C-----T--A-T--CT--G-A-C---T-A-G-A-A-T--C---T-TG----GA-G-A-----G-G-C-G--GG-T-----GG--A-ATT---C-  
C-G-A-GT--GT-A-G-AG-GT--G---A-A-A--TT-C-GT-AG--AT-A-TT--C-G--G-A-G-A-G-A-AC-A-CC--AG--T--G--GC-GAA-G--G-C-G-----G--C-C-C-G--CTG--G--AC-A-A-----G-T--A-T-T-GA--CG-C-T-G--A-GG--T-G-CG-A--AA-G-C---G-TG--GG-  
G--AG-C-A-AA-----CA--GG      Bacteria(100);Proteobacteria(100);Alphaproteobacteria(100);Sphingomonadales(100);Sphingomonadaceae(100);Novosphingobium(100);unclassified(100);unclassified(100);unclassified(100);



|                                                                                                                                                                                                                           |    |   |   |   |   |   |   |   |   |   |   |   |   |   |    |   |   |   |   |   |   |   |   |   |   |   |   |
|---------------------------------------------------------------------------------------------------------------------------------------------------------------------------------------------------------------------------|----|---|---|---|---|---|---|---|---|---|---|---|---|---|----|---|---|---|---|---|---|---|---|---|---|---|---|
| Otu1140                                                                                                                                                                                                                   | 0  | 0 | 0 | 0 | 0 | 0 | 0 | 0 | 0 | 0 | 0 | 0 | 0 | 0 | 0  | 0 | 0 | 0 | 0 | 0 | 0 | 0 | 0 | 0 | 0 | 0 | 0 |
|                                                                                                                                                                                                                           | 0  | 0 | 0 | 0 | 0 | 0 | 0 | 0 | 0 | 0 | 0 | 0 | 0 | 0 | 0  | 0 | 0 | 0 | 0 | 0 | 0 | 0 | 0 | 0 | 0 | 0 | 0 |
|                                                                                                                                                                                                                           | 0  | 0 | 0 | 0 | 0 | 0 | 0 | 0 | 0 | 0 | 0 | 0 | 0 | 0 | 0  | 0 | 0 | 0 | 0 | 0 | 0 | 0 | 0 | 0 | 0 | 0 | 0 |
|                                                                                                                                                                                                                           | 0  | 0 | 0 | 0 | 0 | 0 | 8 | 0 | 0 | 0 | 0 | 0 | 0 | 0 | 0  | 0 | 0 | 0 | 0 | 0 | 0 | 0 | 0 | 0 | 0 | 0 | 0 |
| M02255_77_000000000-ADUT3_1_1113_15469_8018 T---AC---GA-AG-GGG-----GCT-A-G-----C--G--T---T--GC-T-CGG-AA-----TG-A-C-T--GG-GC-----GT--A----AA-GG-GC-GC-----G-TA-G-G-C-G-----G--C-AT-A-T-A-----                              |    |   |   |   |   |   |   |   |   |   |   |   |   |   |    |   |   |   |   |   |   |   |   |   |   |   |   |
| CA---G-T-C-A-----G-A-A-G-TG--A-AA-TT--C-C-TG-G-G-----CT-C-AA-----C-C-T-G-G-G-G--A-C---T-G--C-T---T--T-----T--GA-T-A--C-----G-T-G--TA--A-G-C---T-A-G-A-G-T-G---G-AG-----AA-G-A-----G-G-G-T---TG-T-----GG--A--ATT---T-C-C-  |    |   |   |   |   |   |   |   |   |   |   |   |   |   |    |   |   |   |   |   |   |   |   |   |   |   |   |
| A-GT--GT-A-G-AG-GT--G---A--A-A---TT-C-GT-AG--AT-A-TT--G-G--A-A-A-G-A-AC-A-CC---GG--T--G--GC-GAA-G--G-C-G-----G--C-A-A-C---CTG--G--TC-T-T-----C-T---A-C-T--GA--CG-C-T-G--A-GG--C-G-CG-A--AA-G-C---G-TG--GG-G--             |    |   |   |   |   |   |   |   |   |   |   |   |   |   |    |   |   |   |   |   |   |   |   |   |   |   |   |
| AG-C-A-AA-----CA--GG Bacteria(100);Proteobacteria(100);Alphaproteobacteria(100);Rhodospirillales(100);Acetobacteraceae(100);Acidocella(100);unclassified(100);unclassified(100);unclassified(100);                        |    |   |   |   |   |   |   |   |   |   |   |   |   |   |    |   |   |   |   |   |   |   |   |   |   |   |   |
| Otu1141                                                                                                                                                                                                                   | 0  | 0 | 0 | 0 | 0 | 0 | 0 | 0 | 0 | 0 | 0 | 0 | 0 | 0 | 0  | 0 | 0 | 0 | 0 | 0 | 0 | 0 | 0 | 0 | 0 | 0 | 0 |
|                                                                                                                                                                                                                           | 0  | 0 | 0 | 0 | 0 | 0 | 0 | 0 | 0 | 0 | 0 | 0 | 0 | 0 | 0  | 0 | 0 | 0 | 0 | 0 | 0 | 0 | 0 | 0 | 0 | 0 | 0 |
|                                                                                                                                                                                                                           | 0  | 0 | 0 | 0 | 0 | 0 | 0 | 0 | 0 | 0 | 0 | 0 | 0 | 0 | 0  | 0 | 0 | 0 | 0 | 0 | 0 | 0 | 0 | 0 | 0 | 0 | 0 |
|                                                                                                                                                                                                                           | 0  | 0 | 0 | 0 | 0 | 0 | 8 | 0 | 0 | 0 | 0 | 0 | 0 | 0 | 0  | 0 | 0 | 0 | 0 | 0 | 0 | 0 | 0 | 0 | 0 | 0 | 0 |
| M02255_77_000000000-ADUT3_1_2103_24132_19995 T---AC---AG-AG-GGT-----GCA-A-G-----C--G--T---T--GT-T-CGG-AA-----TT-A-C-T--GG-GC-----G--GC-----T-TA-T---T-----AA---                                                           |    |   |   |   |   |   |   |   |   |   |   |   |   |   |    |   |   |   |   |   |   |   |   |   |   |   |   |
| G-T-C-A-----G-A-T-G-TG--A-AA-TC--C-C-TT-G-G-----CT-C-AA-----C-T-G-A-G-G-A-A-C---T-G--C-A--T-C-----T--GA-T-A--C-----T--G-G--TA--A-G-C---T-T-G-A-G-T-G---T-CG---GA-G-G-----G-G-A-T---GG-T---AG--A--ATT---C-C-T-G-GT--       |    |   |   |   |   |   |   |   |   |   |   |   |   |   |    |   |   |   |   |   |   |   |   |   |   |   |   |
| GT-A-G-AG-GT--G---A--A-A---TT-C-GT-AG--AT-A-TC--A-G--G-A-G-G-A-AT-A-CC---TG--T--G--GC-GAA-G--G-C-G-----A--C-C-A-T---CTG--G--AA-G-A-----C-A--A-C-T--GA--CG-C-T-G--A-GA--C-T-CG-A--AA-G-C---G-TG--GG-T--AG-C-A-             |    |   |   |   |   |   |   |   |   |   |   |   |   |   |    |   |   |   |   |   |   |   |   |   |   |   |   |
| AA-----CA--GG Bacteria(100);Proteobacteria(100);unclassified(100);unclassified(100);unclassified(100);unclassified(100);unclassified(100);unclassified(100);unclassified(100);                                            |    |   |   |   |   |   |   |   |   |   |   |   |   |   |    |   |   |   |   |   |   |   |   |   |   |   |   |
| Otu1142                                                                                                                                                                                                                   | 0  | 0 | 0 | 0 | 0 | 0 | 0 | 0 | 0 | 0 | 0 | 0 | 0 | 0 | 0  | 0 | 0 | 0 | 0 | 0 | 0 | 0 | 0 | 0 | 0 | 0 | 0 |
|                                                                                                                                                                                                                           | 0  | 0 | 0 | 0 | 0 | 0 | 0 | 0 | 0 | 0 | 0 | 0 | 0 | 0 | 0  | 0 | 0 | 0 | 0 | 0 | 0 | 0 | 0 | 0 | 0 | 0 | 0 |
|                                                                                                                                                                                                                           | 0  | 0 | 0 | 0 | 0 | 0 | 0 | 0 | 0 | 0 | 0 | 0 | 0 | 0 | 0  | 0 | 0 | 0 | 0 | 0 | 0 | 0 | 0 | 0 | 0 | 0 | 0 |
|                                                                                                                                                                                                                           | 0  | 0 | 0 | 0 | 0 | 0 | 6 | 0 | 0 | 0 | 0 | 0 | 0 | 0 | 10 | 0 | 0 | 0 | 0 | 0 | 0 | 0 | 0 | 0 | 0 | 0 | 0 |
| M02255_77_000000000-ADUT3_1_2108_23146_16905 T---AC---GA-AG-GGT-----GCT-A-G-----C--G--T---T--GT-T-CGG-AA-----TA-A-C-T--GG-GC-----GT--A----AA-GG-GC-GT-----G-TA-G-G-C-G-----G--T-TT-T-A-T-----                             |    |   |   |   |   |   |   |   |   |   |   |   |   |   |    |   |   |   |   |   |   |   |   |   |   |   |   |
| -----GC---G-T-C-A-----G-A-T-G-TG--A-AA-GT--C-C-TG-G-G-----CT-C-AA-----C-C-T-G-G-G-G--A-C---G-G--C-A--T-T-----T--GA-T-A--C-----G-G-T-AA--G-A-C---T-A-G-A-G-G-T---T-AT---GA-G-A-----G-G-A-A---GG-C-----GG--A--ATT---        |    |   |   |   |   |   |   |   |   |   |   |   |   |   |    |   |   |   |   |   |   |   |   |   |   |   |   |
| G-T-G-C-GT--GT-A-G-GA-GT--G---A--A-A---TC-C-GT-AG--AG-A-TG--C-A--C-A-G-G-A-AC-A-CC---AG--T--T--GC-GAA-G--G-C-G-----G--C-C-T-T---CTG--G--TA-T-T-----A-A--C-C-T--GA--CG-C-T-A--A-GG--C-G-CG-A--AA-G-C---G-TG--GG-           |    |   |   |   |   |   |   |   |   |   |   |   |   |   |    |   |   |   |   |   |   |   |   |   |   |   |   |
| G--AG-C-A-AA-----CA--GG Bacteria(100);unclassified(100);unclassified(100);unclassified(100);unclassified(100);unclassified(100);unclassified(100);unclassified(100);unclassified(100);                                    |    |   |   |   |   |   |   |   |   |   |   |   |   |   |    |   |   |   |   |   |   |   |   |   |   |   |   |
| Otu1143                                                                                                                                                                                                                   | 0  | 0 | 0 | 0 | 0 | 0 | 0 | 0 | 0 | 0 | 0 | 0 | 0 | 0 | 0  | 0 | 0 | 0 | 0 | 0 | 0 | 0 | 0 | 0 | 0 | 0 | 0 |
|                                                                                                                                                                                                                           | 0  | 0 | 0 | 0 | 0 | 0 | 0 | 0 | 0 | 0 | 0 | 0 | 0 | 0 | 0  | 0 | 0 | 0 | 0 | 0 | 0 | 0 | 0 | 0 | 0 | 0 | 0 |
|                                                                                                                                                                                                                           | 0  | 0 | 0 | 0 | 0 | 0 | 0 | 0 | 0 | 0 | 0 | 0 | 0 | 0 | 0  | 0 | 0 | 0 | 0 | 0 | 0 | 0 | 0 | 0 | 0 | 0 | 0 |
|                                                                                                                                                                                                                           | 0  | 0 | 0 | 0 | 0 | 0 | 6 | 0 | 0 | 0 | 0 | 0 | 0 | 0 | 0  | 0 | 0 | 0 | 0 | 0 | 0 | 0 | 0 | 0 | 0 | 0 | 0 |
| M02255_77_000000000-ADUT3_1_2119_23290_19130 T---AC---AG-AG-GTC-----TCA-A-G-----C--G--T---T--GT-T-CGG-AT-----TC-A-T-T--GG-GC-----GT--A----AA-GG-GT-GC-----G-TA-G-G-T-G-----G--C-TT-G-G-T-----                             |    |   |   |   |   |   |   |   |   |   |   |   |   |   |    |   |   |   |   |   |   |   |   |   |   |   |   |
| -----AA---G-T-T-G-----A-A-G--G--TG--A-AA-TC--T-C-GG-G-G-----CT-T-AA-----C-T-C-C-G-A-A-A-C---T-G--C-C---T--T-----C--AA-T-A--C-----T--G-C--TG--A-G-C---T-C-G-A-G-G-A---T-TG---TA-G-A-----G-G-A-G---AA-T-----GG--A--ATT---C- |    |   |   |   |   |   |   |   |   |   |   |   |   |   |    |   |   |   |   |   |   |   |   |   |   |   |   |
| A-C-G-GT--GT-A-G-CA-GT--G---A--A-A---TG-C-GT-AG--AT-A-TC--G-T--G-A-G-G-A-AG-A-CC---AG--T--G--GC-GAA-G--G-C-G-----A--T-T-C-T---CTG--G--GC-A-A-----T-T---C-C-T--GA--CA-C-T-G--A-GG--C-A-CG-A--AG-G-C---C-AG--GG-G-          |    |   |   |   |   |   |   |   |   |   |   |   |   |   |    |   |   |   |   |   |   |   |   |   |   |   |   |
| -AG-C-A-AA-----CG--GG Bacteria(100);Verrucomicrobia(100);Spartobacteria(100);unclassified(100);unclassified(100);unclassified(100);unclassified(100);unclassified(100);unclassified(100);                                 |    |   |   |   |   |   |   |   |   |   |   |   |   |   |    |   |   |   |   |   |   |   |   |   |   |   |   |
| Otu1144                                                                                                                                                                                                                   | 0  | 0 | 0 | 0 | 0 | 0 | 0 | 0 | 0 | 0 | 0 | 0 | 0 | 0 | 0  | 0 | 0 | 0 | 0 | 0 | 0 | 0 | 0 | 0 | 0 | 0 | 0 |
|                                                                                                                                                                                                                           | 0  | 0 | 0 | 0 | 0 | 0 | 0 | 0 | 0 | 0 | 0 | 0 | 0 | 0 | 0  | 0 | 0 | 0 | 0 | 0 | 0 | 0 | 0 | 0 | 0 | 0 | 0 |
|                                                                                                                                                                                                                           | 0  | 0 | 0 | 0 | 0 | 0 | 0 | 0 | 0 | 0 | 0 | 0 | 0 | 0 | 0  | 0 | 0 | 0 | 0 | 0 | 0 | 0 | 0 | 0 | 0 | 0 | 0 |
|                                                                                                                                                                                                                           | 10 | 0 | 0 | 0 | 0 | 0 | 0 | 0 | 0 | 0 | 0 | 0 | 0 | 0 | 0  | 0 | 0 | 0 | 0 | 0 | 0 | 0 | 0 | 0 | 0 | 0 | 0 |
| M02255_76_000000000-ADUNE_1_1113_12144_2859 C---GG---CT-AA-ATA-----CGT-G-C-----C--A-G---C--AG-C-CGC-GG-----TA-A-T-A--CG-G-----AT--G-----TC-CC-GA-GC-----GTTA-T-C-C-G-----G--T-TG-G-T-T-----AA--                           |    |   |   |   |   |   |   |   |   |   |   |   |   |   |    |   |   |   |   |   |   |   |   |   |   |   |   |
| --G-T-C-T-----G-A-T-G--TG--A-AA-GC--C-C-GG-A-G-----CT-C-AA-----C-T-C-C-G-G-A-A-A---G-G--C-A--T-T-----G--GA-A-A--C-----T--G-G--TT--A-A-C---T-T-G-A-G-T-G---C-AG---TA-G-A-----G-G-T-A--AG-T-----GG--A--ACT---C-C-A-T-       |    |   |   |   |   |   |   |   |   |   |   |   |   |   |    |   |   |   |   |   |   |   |   |   |   |   |   |
| GT--GT-A-G-CG-GT--G---G--A-A---TG-C-GT-AG--AT-A-TA--T-G--G-A-A-G-A-AC-A-CC---AG--C--G--GC-GAA-G--G-C-G-----G--C-T-T-A---CTG--G--AC-T-G-----T-A--A-C-T--GA--CG-T-T-G--A-GG--C-T-CG-A--AA-G-T---G-TG--GG-T--AG-C-           |    |   |   |   |   |   |   |   |   |   |   |   |   |   |    |   |   |   |   |   |   |   |   |   |   |   |   |
| A-AA-----CA--GG Bacteria(100);Firmicutes(100);Bacilli(100);Lactobacillales(100);Leuconostocaceae(100);Leuconostoc(100);unclassified(100);unclassified(100);unclassified(100);                                             |    |   |   |   |   |   |   |   |   |   |   |   |   |   |    |   |   |   |   |   |   |   |   |   |   |   |   |



|                                                                                                                                                                                                                                                                                                                                                                                                                                                                                                                                                                                                                                                                                                                                                                                                                      |   |   |   |   |    |   |   |   |   |   |   |   |   |   |   |   |   |   |   |   |   |   |   |   |   |   |   |
|----------------------------------------------------------------------------------------------------------------------------------------------------------------------------------------------------------------------------------------------------------------------------------------------------------------------------------------------------------------------------------------------------------------------------------------------------------------------------------------------------------------------------------------------------------------------------------------------------------------------------------------------------------------------------------------------------------------------------------------------------------------------------------------------------------------------|---|---|---|---|----|---|---|---|---|---|---|---|---|---|---|---|---|---|---|---|---|---|---|---|---|---|---|
| Otu1145                                                                                                                                                                                                                                                                                                                                                                                                                                                                                                                                                                                                                                                                                                                                                                                                              | 0 | 0 | 0 | 0 | 0  | 0 | 0 | 0 | 0 | 0 | 0 | 0 | 0 | 0 | 0 | 0 | 0 | 0 | 0 | 0 | 0 | 0 | 0 | 0 | 0 | 0 | 0 |
|                                                                                                                                                                                                                                                                                                                                                                                                                                                                                                                                                                                                                                                                                                                                                                                                                      | 0 | 0 | 0 | 0 | 0  | 0 | 0 | 0 | 0 | 0 | 0 | 0 | 0 | 0 | 0 | 0 | 0 | 0 | 0 | 0 | 0 | 0 | 0 | 0 | 0 | 0 | 0 |
|                                                                                                                                                                                                                                                                                                                                                                                                                                                                                                                                                                                                                                                                                                                                                                                                                      | 0 | 0 | 0 | 0 | 0  | 0 | 0 | 0 | 0 | 0 | 0 | 0 | 0 | 0 | 0 | 0 | 0 | 0 | 0 | 0 | 0 | 0 | 0 | 0 | 0 | 0 | 0 |
|                                                                                                                                                                                                                                                                                                                                                                                                                                                                                                                                                                                                                                                                                                                                                                                                                      | 0 | 0 | 0 | 0 | 26 | 0 | 0 | 0 | 0 | 0 | 0 | 0 | 0 | 0 | 0 | 0 | 0 | 0 | 0 | 0 | 0 | 0 | 0 | 0 | 0 | 0 | 0 |
| M02255_77_000000000-ADUT3_1_1106_23820_5584 T---AC---GG-AG-GAT-----CCA-A-G-----C-G-T---T-AT-C-CGG-AT-----TT-A-----TT-----G-G-----G-TA-G-G-C-G-----G-C-AT-G-C-T-----AA---G-T-C-A-----G-G-G--G-TG--A-AA-TA--C-G-GT-G-G----CT-C-AA-----C-C-A-T-C-G-C-A-G---T-G-C-C---T-T-----T-GA-T-A--C-----T-G-G-CG-T-G-C---T-T-G-A-A-T--G---T-AC----AT-G-A-----G-G-T-A--GG-C-----GG--A-ATG---A-G-A-C-AA--GT-A-G-CG-GT-G--A-A-A--TG-C-AT-AG--AT-A-TG-T-C--T-C-A-G-A-AC-T-CC--GA-T-T-GC-GAA-G-G-C-A-----G--C-T-T-A--CTA--A-GG-T-A-----T-G--A-T-T-GA-CG-C-T-G--A-GG--C-A-CG-A-AA-G-C---G-TG--GG-G--AT-C-A-AA-----CA--GG Bacteria(100);Bacteroidetes(100);Sphingobacteria(100);Sphingobacteriales(100);Sphingobacteriaceae(100);Sphingobacteriaceae(100);unclassified(100);unclassified(100);unclassified(100);                          |   |   |   |   |    |   |   |   |   |   |   |   |   |   |   |   |   |   |   |   |   |   |   |   |   |   |   |
| Otu1146                                                                                                                                                                                                                                                                                                                                                                                                                                                                                                                                                                                                                                                                                                                                                                                                              | 0 | 0 | 0 | 0 | 0  | 0 | 0 | 0 | 0 | 0 | 0 | 0 | 0 | 0 | 0 | 0 | 0 | 0 | 0 | 0 | 0 | 0 | 0 | 0 | 0 | 0 | 0 |
|                                                                                                                                                                                                                                                                                                                                                                                                                                                                                                                                                                                                                                                                                                                                                                                                                      | 0 | 0 | 0 | 0 | 0  | 0 | 0 | 0 | 0 | 0 | 0 | 0 | 0 | 0 | 0 | 0 | 0 | 0 | 0 | 0 | 0 | 0 | 0 | 0 | 0 | 0 | 0 |
|                                                                                                                                                                                                                                                                                                                                                                                                                                                                                                                                                                                                                                                                                                                                                                                                                      | 0 | 0 | 0 | 0 | 0  | 0 | 0 | 0 | 0 | 0 | 0 | 0 | 0 | 0 | 0 | 0 | 0 | 0 | 0 | 0 | 0 | 0 | 0 | 0 | 0 | 0 | 0 |
|                                                                                                                                                                                                                                                                                                                                                                                                                                                                                                                                                                                                                                                                                                                                                                                                                      | 0 | 0 | 0 | 0 | 76 | 0 | 0 | 0 | 0 | 0 | 0 | 0 | 0 | 0 | 0 | 0 | 0 | 0 | 0 | 0 | 0 | 0 | 0 | 0 | 0 | 0 | 0 |
| M02255_77_000000000-ADUT3_1_1102_12657_16690 T---AC---GT-AG-GGA-----GCG-A-G-----C-G-T---T-AT-C-CGG-AA-----TT-A-T-T--GG-GT-----GT-A---AA-GG-GT-GC-----G-TA-G-A-C-G-----G-G-AA-G-A-T-----AA---G-T-T-A-----G-T-T--G-TG--A-AA-TC--C-C-TC-G-G----CT-T-AA-----C-T-G-A-G-G-A-A-C---T-G--C-A--A-C-----T-AA-A-A--C-----T-G-T-TT--T-T-C---T-T-G-A-G-T--G---C-AG---GA-G-A-----G-G-T-A--AG-T-----GG--A-ATT---C-C-T-A-GT--GT-A-G-CG-GT--G---A-A-A--TG-C-GT-AG--AT-A-TT--A-G--G-A-G-G-A-AC-A-CC--AG--T-G--GC-GAA-G-G-C-G-----A-C-T-T-A--CTG--G--AC-T-G-----T-A--A-C-T-GA-CG-T-T-G--A-GG--C-A-CG-A-AA-G-T--G-TG--GG-G--AG-C-A-AA-----CA--GG Bacteria(100);Firmicutes(100);Clostridia(100);Clostridiales(100);Ruminococcaceae(100);uncultured(100);unclassified(100);unclassified(100);unclassified(100);                            |   |   |   |   |    |   |   |   |   |   |   |   |   |   |   |   |   |   |   |   |   |   |   |   |   |   |   |
| Otu1147                                                                                                                                                                                                                                                                                                                                                                                                                                                                                                                                                                                                                                                                                                                                                                                                              | 0 | 0 | 0 | 0 | 0  | 0 | 0 | 0 | 0 | 0 | 0 | 0 | 0 | 0 | 0 | 0 | 0 | 0 | 0 | 0 | 0 | 0 | 0 | 0 | 0 | 0 | 0 |
|                                                                                                                                                                                                                                                                                                                                                                                                                                                                                                                                                                                                                                                                                                                                                                                                                      | 0 | 0 | 0 | 0 | 0  | 0 | 0 | 0 | 0 | 0 | 0 | 0 | 0 | 0 | 0 | 0 | 0 | 0 | 0 | 0 | 0 | 0 | 0 | 0 | 0 | 0 | 0 |
|                                                                                                                                                                                                                                                                                                                                                                                                                                                                                                                                                                                                                                                                                                                                                                                                                      | 0 | 0 | 0 | 0 | 0  | 0 | 0 | 0 | 0 | 0 | 0 | 0 | 0 | 0 | 0 | 0 | 0 | 0 | 0 | 0 | 0 | 0 | 0 | 0 | 0 | 0 | 0 |
|                                                                                                                                                                                                                                                                                                                                                                                                                                                                                                                                                                                                                                                                                                                                                                                                                      | 0 | 0 | 0 | 0 | 43 | 0 | 0 | 0 | 0 | 0 | 0 | 0 | 0 | 0 | 0 | 0 | 0 | 0 | 0 | 0 | 0 | 0 | 0 | 0 | 0 | 0 | 0 |
| M02255_77_000000000-ADUT3_1_1102_18303_12106 T---AC---GA-AG-GGG-----GCT-A-G-----C-G-T---T-GC-T-CGG-AA-----TT-A-C-T--GG-GC-----GT-A---AA-GG-GC-GC-----G-TA-G-G-C-G-----G--C-GC-T-C-C-----AA---G-T-T-A-----G-G-C--G--TG--A-AA-TT--C-C-CG-G-G----CT-C-AA-----C-C-T-G-G-G-G--A-C---T-G--C-G--C--T-----T-AA-G-A--C-----T-G-G--AG--T-G-C---T-T-G-A-G-G--A--T-GG-----AA-G-A-----G-G-G-T--TG-T-----GG--A-ATT---C-C-C-A-GT--GT-A-G-AG-GT--G---A-A-A--TT-C-GT-AG--AT-A-TT--G-G--G-A-A-G-A-AC-A-CC--GG--T-G--GC-GAA-G-G-C-G-----G--C-A-A-C--CTG--G--TC-C-A-----T-T--A-C-T-GA-CG-C-T-G--A-GG--C-G-CG-A--TA-G-C--G-TG--GG-G--AG-C-A-AA-----CA--GG Bacteria(100);Proteobacteria(100);Alphaproteobacteria(100);Rhodospirillales(100);Acetobacteraceae(100);unclassified(100);unclassified(100);unclassified(100);unclassified(100); |   |   |   |   |    |   |   |   |   |   |   |   |   |   |   |   |   |   |   |   |   |   |   |   |   |   |   |
| Otu1148                                                                                                                                                                                                                                                                                                                                                                                                                                                                                                                                                                                                                                                                                                                                                                                                              | 0 | 0 | 0 | 0 | 0  | 0 | 0 | 0 | 0 | 0 | 0 | 0 | 0 | 0 | 0 | 0 | 0 | 0 | 0 | 0 | 0 | 0 | 0 | 0 | 0 | 0 | 0 |
|                                                                                                                                                                                                                                                                                                                                                                                                                                                                                                                                                                                                                                                                                                                                                                                                                      | 0 | 0 | 0 | 0 | 0  | 0 | 0 | 0 | 0 | 0 | 0 | 0 | 0 | 0 | 0 | 0 | 0 | 0 | 0 | 0 | 0 | 0 | 0 | 0 | 0 | 0 | 0 |
|                                                                                                                                                                                                                                                                                                                                                                                                                                                                                                                                                                                                                                                                                                                                                                                                                      | 0 | 0 | 0 | 0 | 0  | 0 | 0 | 0 | 0 | 0 | 0 | 0 | 0 | 0 | 0 | 0 | 0 | 0 | 0 | 0 | 0 | 0 | 0 | 0 | 0 | 0 | 0 |
|                                                                                                                                                                                                                                                                                                                                                                                                                                                                                                                                                                                                                                                                                                                                                                                                                      | 0 | 0 | 0 | 3 | 12 | 0 | 0 | 0 | 0 | 0 | 0 | 0 | 0 | 0 | 0 | 0 | 0 | 0 | 0 | 0 | 0 | 0 | 0 | 0 | 0 | 0 | 0 |
| M02255_77_000000000-ADUT3_1_1114_12003_8461 T---AC---GG-AG-GAT-----GCA-A-G-----C-G-T---T-AT-C-CGG-AA-----TG-A-T-T--GG-GC-----GT-A---AA-GC-GT-TT-----T-AA-G-G-T-G-----G--T-TT-G-G-T-----AA---G-T-C-T-----A-C-T-G--TT--A                                                                                                                                                                                                                                                                                                                                                                                                                                                                                                                                                                                               |   |   |   |   |    |   |   |   |   |   |   |   |   |   |   |   |   |   |   |   |   |   |   |   |   |   |   |



[illegible]



|         |                                                                                                                                                                                                                            |   |   |    |   |   |   |   |   |   |   |   |   |   |   |   |   |   |   |   |   |   |   |   |   |   |   |  |
|---------|----------------------------------------------------------------------------------------------------------------------------------------------------------------------------------------------------------------------------|---|---|----|---|---|---|---|---|---|---|---|---|---|---|---|---|---|---|---|---|---|---|---|---|---|---|--|
| Otu1155 | 0                                                                                                                                                                                                                          | 0 | 0 | 0  | 0 | 0 | 0 | 0 | 0 | 0 | 0 | 0 | 0 | 0 | 0 | 0 | 0 | 0 | 0 | 0 | 0 | 0 | 0 | 0 | 0 | 0 | 0 |  |
|         | 0                                                                                                                                                                                                                          | 0 | 0 | 0  | 0 | 0 | 0 | 0 | 0 | 0 | 0 | 0 | 0 | 0 | 0 | 0 | 0 | 0 | 0 | 0 | 0 | 0 | 0 | 0 | 0 | 0 | 0 |  |
|         | 0                                                                                                                                                                                                                          | 0 | 0 | 0  | 0 | 0 | 0 | 0 | 0 | 0 | 0 | 0 | 0 | 0 | 0 | 0 | 0 | 0 | 0 | 0 | 0 | 0 | 0 | 0 | 0 | 0 | 0 |  |
|         | 0                                                                                                                                                                                                                          | 0 | 0 | 27 | 0 | 0 | 0 | 0 | 0 | 0 | 0 | 0 | 0 | 0 | 0 | 0 | 0 | 0 | 0 | 0 | 0 | 0 | 0 | 0 | 0 | 0 | 0 |  |
|         | M02255_77_000000000-ADUT3_1_2109_23226_11179 T---AC--GA-AG-GGG-----GCT-A-G-----C-G-T---T--GC-T-CGG-AA-----TG-A--C-T--GG-GC-----GT--A----AA-GG-GC-GC-----G-TA-G-G-C-G-----G--T-TT-G-T-A----                                 |   |   |    |   |   |   |   |   |   |   |   |   |   |   |   |   |   |   |   |   |   |   |   |   |   |   |  |
|         | -----CA---G-T-C-G-----G-A-T--G--TG--A-AA-TT--C-C-TG-G-G-----CT-T-AA-----C-C-T-G-G-G-G-G-C---T-G--C-A---T-T-----C--GA-T-A---C-----G--T-G--CA--G-G-C---T-T-G-A-G-T--G---T-GG----AA-G-A-----G-G-G-T---TG-T-----GG--A--ATT---- |   |   |    |   |   |   |   |   |   |   |   |   |   |   |   |   |   |   |   |   |   |   |   |   |   |   |  |
|         | C-C-C-A-GT--GT-A-G-AG-GT--G---A--A---TT-C-GT-AG--AT-A-TT--G-G--G-A-A-G-A-AC-A-CC---GG--T--G--GC-GAA-G--G-C--G-----G--C-A-A-C---CTG--G--TC-C-A-----T-G---A-C-T--GA--CG-C-T-G--A-TG--C-G-CG-A--AA-G-C---G-TG--GG--           |   |   |    |   |   |   |   |   |   |   |   |   |   |   |   |   |   |   |   |   |   |   |   |   |   |   |  |
|         | G--AG-C-A-AA-----CA--GG Bacteria(100);Proteobacteria(100);Alphaproteobacteria(100);Rhodospirillales(100);Acetobacteraceae(100);unclassified(100);unclassified(100);unclassified(100);unclassified(100);                    |   |   |    |   |   |   |   |   |   |   |   |   |   |   |   |   |   |   |   |   |   |   |   |   |   |   |  |
| Otu1156 | 0                                                                                                                                                                                                                          | 0 | 0 | 0  | 0 | 0 | 0 | 0 | 0 | 0 | 0 | 0 | 0 | 0 | 0 | 0 | 0 | 0 | 0 | 0 | 0 | 0 | 0 | 0 | 0 | 0 | 0 |  |
|         | 0                                                                                                                                                                                                                          | 0 | 0 | 0  | 0 | 0 | 0 | 0 | 0 | 0 | 0 | 0 | 0 | 0 | 0 | 0 | 0 | 0 | 0 | 0 | 0 | 0 | 0 | 0 | 0 | 0 | 0 |  |
|         | 0                                                                                                                                                                                                                          | 0 | 0 | 0  | 0 | 0 | 0 | 0 | 0 | 0 | 0 | 0 | 0 | 0 | 0 | 0 | 0 | 0 | 0 | 0 | 0 | 0 | 0 | 0 | 0 | 0 | 0 |  |
|         | 0                                                                                                                                                                                                                          | 0 | 0 | 21 | 0 | 0 | 0 | 0 | 0 | 0 | 0 | 0 | 0 | 0 | 0 | 0 | 0 | 0 | 0 | 0 | 0 | 0 | 0 | 0 | 0 | 0 | 0 |  |
|         | M02255_77_000000000-ADUT3_1_2106_18147_12497 T---AC--GT-AG-GGG-----CCG-A-G-----C-G-T---T--GT-C-CGG-AA-----TT-A--C-T--GG-GC-----GT--A----AA-GC-GC-GC-----G-CA-G-G-C-G-----G--C-TG-A-T-C----                                 |   |   |    |   |   |   |   |   |   |   |   |   |   |   |   |   |   |   |   |   |   |   |   |   |   |   |  |
|         | -----AA---G-C-C-T-----G-A-C-G--TG--A-AA-GC--C-C-CC-G-G-----CT-C-AA-----C-C-G-G-G-G-A-G-G---G-T--C-G---T-C-----G--GG-G-A---C-----T-G-A-TT--G-G-C---T-T-G-A-G-G--G---C-GG----TA-G-G-----G-G-C-C---GG-T-----GG--A--ATT----    |   |   |    |   |   |   |   |   |   |   |   |   |   |   |   |   |   |   |   |   |   |   |   |   |   |   |  |
|         | C-C-C-G-GT--GT-A-G-TG-GT--G---A--A---TG-C-GT-AG--AG-A-TC--G-G--G-A-G-G-A-AC-A-CC---AG--T--G--GC-GAA-G--G-C--G-----G--C-C-G-G---CTG--G--GC-C-G-----A-C---C-C-T--GA--CG-C-T-G--A-GG--C-G-CG-A--AG-G-C---G-TG--               |   |   |    |   |   |   |   |   |   |   |   |   |   |   |   |   |   |   |   |   |   |   |   |   |   |   |  |
|         | GG-G--AG-C-G-AA-----CG--GG Bacteria(100);unclassified(100);unclassified(100);unclassified(100);unclassified(100);unclassified(100);unclassified(100);unclassified(100);unclassified(100);                                  |   |   |    |   |   |   |   |   |   |   |   |   |   |   |   |   |   |   |   |   |   |   |   |   |   |   |  |
| Otu1157 | 0                                                                                                                                                                                                                          | 0 | 0 | 0  | 0 | 0 | 0 | 0 | 0 | 0 | 0 | 0 | 0 | 0 | 0 | 0 | 0 | 0 | 0 | 0 | 0 | 0 | 0 | 0 | 0 | 0 | 0 |  |
|         | 0                                                                                                                                                                                                                          | 0 | 0 | 0  | 0 | 0 | 0 | 0 | 0 | 0 | 0 | 0 | 0 | 0 | 0 | 0 | 0 | 0 | 0 | 0 | 0 | 0 | 0 | 0 | 0 | 0 | 0 |  |
|         | 0                                                                                                                                                                                                                          | 0 | 0 | 0  | 0 | 0 | 0 | 0 | 0 | 0 | 0 | 0 | 0 | 0 | 0 | 0 | 0 | 0 | 0 | 0 | 0 | 0 | 0 | 0 | 0 | 0 | 0 |  |
|         | 0                                                                                                                                                                                                                          | 0 | 0 | 20 | 0 | 0 | 0 | 0 | 0 | 0 | 0 | 0 | 0 | 0 | 0 | 0 | 0 | 0 | 0 | 0 | 0 | 0 | 0 | 0 | 0 | 0 | 0 |  |
|         | M02255_77_000000000-ADUT3_1_2102_6079_19923 T---AC--GT-AT-GTC-----GCG-A-G-----C-G-T---T--AT-C-CGG-AA-----TT-A--T-T--GG-GC-----AT--A----AA-GG-GC-AT-----C-TA-G-G-C-G-----G--C-CA-G-A-T-----AA--                             |   |   |    |   |   |   |   |   |   |   |   |   |   |   |   |   |   |   |   |   |   |   |   |   |   |   |  |
|         | --G-T-C-C-----G-A-G-G--TG--A-AA-AC--T-G-CC-G-G-----CT-C-AA-----C-C-A-G-C-A-G--C-T---T-G--C-C---T-T-----G--GA-A-A---C-----T-A-C-CT--G-G-C---T-A-G-A-G-T-A---T-TG----GA-G-A-----G-G-T-G--GA-C-----GG--A--ACT---A-C-A-C-      |   |   |    |   |   |   |   |   |   |   |   |   |   |   |   |   |   |   |   |   |   |   |   |   |   |   |  |
|         | GA--GT-A-G-AG-GT--G---A--A---TT-C-GT-AG--AT-A-TG--T-G--T-A-G-G-A-AT-G-CC---GA--T--G--AT-GAA-G--A-T-A-----G--T-T-C-A---CTG--G--AT-G-A-----T-A---A-C-T--GA--CG-C-T-G--A-AG--T-G-CG-A--AA-G-C---T-AG--GG-G--AG-C-             |   |   |    |   |   |   |   |   |   |   |   |   |   |   |   |   |   |   |   |   |   |   |   |   |   |   |  |
|         | G-AA-----CA--GG Bacteria(100);Fusobacteria(100);Fusobacteria(100);Fusobacteriales(100);Leptotrichiaceae(100);Leptotrichia(100);unclassified(100);unclassified(100);unclassified(100);                                      |   |   |    |   |   |   |   |   |   |   |   |   |   |   |   |   |   |   |   |   |   |   |   |   |   |   |  |
| Otu1158 | 0                                                                                                                                                                                                                          | 0 | 0 | 0  | 0 | 0 | 0 | 0 | 0 | 0 | 0 | 0 | 0 | 0 | 0 | 0 | 0 | 0 | 0 | 0 | 0 | 0 | 0 | 0 | 0 | 0 | 0 |  |
|         | 0                                                                                                                                                                                                                          | 0 | 0 | 0  | 0 | 0 | 0 | 0 | 0 | 0 | 0 | 0 | 0 | 0 | 0 | 0 | 0 | 0 | 0 | 0 | 0 | 0 | 0 | 0 | 0 | 0 | 0 |  |
|         | 0                                                                                                                                                                                                                          | 0 | 0 | 0  | 0 | 0 | 0 | 0 | 0 | 0 | 0 | 0 | 0 | 0 | 0 | 0 | 0 | 0 | 0 | 0 | 0 | 0 | 0 | 0 | 0 | 0 | 0 |  |
|         | 0                                                                                                                                                                                                                          | 0 | 0 | 43 | 0 | 0 | 0 | 0 | 0 | 0 | 0 | 0 | 0 | 0 | 0 | 0 | 0 | 0 | 0 | 0 | 0 | 0 | 0 | 0 | 0 | 0 | 0 |  |
|         | M02255_77_000000000-ADUT3_1_2102_19156_18206 T---AC--GA-AG-GGG-----GCT-A-G-----C-G-T---T--GC-T-CGG-AA-----TG-A--C-T--GG-GC-----GT--A----AA-GG-GC-GC-----G-TA-G-G-C-G-----G--C-GC-G-T-A---                                  |   |   |    |   |   |   |   |   |   |   |   |   |   |   |   |   |   |   |   |   |   |   |   |   |   |   |  |
|         | -----CA---G-T-C-A-----G-A-A-G--TG--A-AA-TT--C-C-TG-G-G-----CT-C-AA-----C-C-T-G-G-G-G--A-C---T-G--C-T---T-T-----T--GA-T-A---C-----G--T-G--CG--T-G-C---T-T-G-A-G-T--G---A-GG----AA-G-A-----G-G-G-T---TG-T-----GG--A--ATT---- |   |   |    |   |   |   |   |   |   |   |   |   |   |   |   |   |   |   |   |   |   |   |   |   |   |   |  |
|         | T-C-C-A-GT--GT-A-G-AG-GT--G---A--A---TT-C-GT-AG--AT-A-TT--G-G--A-A-A-G-A-AC-A-CC---GG--T--G--GC-GAA-G--G-C--G-----G--C-A-A-C---CTG--G--TC-C-T-----T-T---A-C-T--GA--CG-C-T-G--A-GG--C-G-CG-A--AA-G-C---G-TG--GG--           |   |   |    |   |   |   |   |   |   |   |   |   |   |   |   |   |   |   |   |   |   |   |   |   |   |   |  |
|         | G--AG-C-A-AA-----CA--GG Bacteria(100);Proteobacteria(100);Alphaproteobacteria(100);Rhodospirillales(100);Acetobacteraceae(100);Acidocella(100);unclassified(100);unclassified(100);unclassified(100);                      |   |   |    |   |   |   |   |   |   |   |   |   |   |   |   |   |   |   |   |   |   |   |   |   |   |   |  |
| Otu1159 | 0                                                                                                                                                                                                                          | 0 | 0 | 0  | 0 | 0 | 0 | 0 | 0 | 0 | 0 | 0 | 0 | 0 | 0 | 0 | 0 | 0 | 0 | 0 | 0 | 0 | 0 | 0 | 0 | 0 | 0 |  |
|         | 0                                                                                                                                                                                                                          | 0 | 0 | 0  | 0 | 0 | 0 | 0 | 0 | 0 | 0 | 0 | 0 | 0 | 0 | 0 | 0 | 0 | 0 | 0 | 0 | 0 | 0 | 0 | 0 | 0 | 0 |  |
|         | 0                                                                                                                                                                                                                          | 0 | 0 | 0  | 0 | 0 | 0 | 0 | 0 | 0 | 0 | 0 | 0 | 0 | 0 | 0 | 0 | 0 | 0 | 0 | 0 | 0 | 0 | 0 | 0 | 0 | 0 |  |
|         | 0                                                                                                                                                                                                                          | 0 | 0 | 20 | 0 | 0 | 0 | 0 | 0 | 0 | 0 | 0 | 0 | 0 | 0 | 0 | 0 | 0 | 0 | 0 | 0 | 0 | 0 | 0 | 0 | 0 | 0 |  |
|         | M02255_77_000000000-ADUT3_1_2102_23380_13288 T---AC--GG-AG-GGG-----GCT-A-G-----C-G-T---T--GT-T-CGG-AA-----TT-A--C-T--GG-GC-----GT--A----AA-GC-GC-AC-----G-TA-G-G-C-G-----G--C-TT-C-C-T-----                                |   |   |    |   |   |   |   |   |   |   |   |   |   |   |   |   |   |   |   |   |   |   |   |   |   |   |  |
|         | -----AA---G-T-C-A-----G-A-G-G--TG--A-AA-GC--C-C-GG-A-G-----CT-C-AA-----C-T-C-C-G-G-A-A-T---A-G--C-C---T-T-----T--GA-G-A---C-----T-G-G-GT--C-G-C---T-T-G-A-A-T-C---C-AG----GA-G-A-----G-G-T-G---AG-T-----GG--A--ATT----     |   |   |    |   |   |   |   |   |   |   |   |   |   |   |   |   |   |   |   |   |   |   |   |   |   |   |  |
|         | C-C-G-A-GT--GT-A-G-AG-GT--G---A--A---TT-C-GT-AG--AT-A-TT--C-G--G-A-A-G-A-AC-A-CC---AG--T--G--GC-GAA-G--G-C--G-----G--C-T-C-A---CTG--G--AC-T-G-----G-T---A-T-T--GA--CG-C-T-G--A-GG--T-G-CG-A--AA-G-C---G-TG--GG--           |   |   |    |   |   |   |   |   |   |   |   |   |   |   |   |   |   |   |   |   |   |   |   |   |   |   |  |
|         | G--AG-C-A-AA-----CA--GG Bacteria(100);Proteobacteria(100);Alphaproteobacteria(100);Sphingomonadales(100);Sphingomonadaceae(100);unclassified(100);unclassified(100);unclassified(100);unclassified(100);                   |   |   |    |   |   |   |   |   |   |   |   |   |   |   |   |   |   |   |   |   |   |   |   |   |   |   |  |



Otu1160 0 0 0 0 0 0 0 0 0 0 0 0 0 0 0 0 0 0 0 0 0 0 0 0 0 0 0 0  
0 0 0 0 0 0 0 0 0 0 0 0 0 0 0 0 0 0 0 0 0 0 0 0 0 0 0 0  
0 0 0 0 0 0 0 0 0 0 0 0 0 0 0 0 0 0 0 0 0 0 0 11 0 0 0 0  
0 0 0 0 0 0 0 0 0 0 0 0 0 0 0 0 0 0 0 0 0 0 0 0 0 0  
M02255\_77\_000000000-ADUT3\_1\_1115\_21119\_17035 T---AC--GA-AG-GGG-----GCT-A-G-----C-G-T--T--GC-T-CGG-AA-----TG-A--C-T--GG-GC-----GT--A----AA-GG-GC-GC-----G-TA-G-G-C-G-----G--C-TC-A-T-T----  
-----TT---G-T-C-A-----G-G-C--G--TG--A-AA-GT--C-C-TG-G-G----CT-C-AA-----C-C-T-G-G-G-G--A-C---G-G--C-G---C--T-----T--GG-G-A--C-----G--G-G--TG--G-G-C---T-T-G-A-G-T--G--G-GG----AA-G-A-----G-G-G-T--CG-T-----GG--A--ATT---  
-C-C-C-A-GT--GT-A-G-AG-GT--G---A--A-A---TT-C-GT-AG--AT-A-TT--G-G--G-A-A-G-A-AC-A-CC---GG--T--G--GC-GAA-G--G-C-G-----G--C-G-A-C---CTG--G--TC-CTT-----T-T--A-C-T--GA--CG-C-T-G--A-GG--C-G-CG-A--GA-G-C---G-TG--  
GG-G--AG-C-A-AA-----CA--GG Bacteria(100);Proteobacteria(100);Alphaproteobacteria(100);Rhodospirillales(100);Acetobacteraceae(100);unclassified(100);unclassified(100);unclassified(100);unclassified(100);

Otu1161 0 0 0 0 0 0 0 0 0 0 0 0 0 0 0 0 0 0 0 0 0 0 0 0 0 0 0 0  
0 0 0 0 0 0 0 0 0 0 0 0 0 0 0 0 0 0 0 0 0 0 0 0 0 0 0 0  
0 0 0 0 0 0 0 0 0 0 0 0 0 0 0 0 0 0 0 0 0 0 0 44 0 0 0 0  
0 0 0 0 0 0 0 0 0 0 0 0 0 0 0 0 0 0 0 0 0 0 0 0 0 0  
M02255\_77\_000000000-ADUT3\_1\_2118\_20326\_21662 T---AC--GT-AG-GGG-----GCG-A-G-----C-G-T--T--GT-C-CGG-AA-----TT-A--C-T--GG-GC-----GT--A----AA-GG-GT-GC-----G-TA-G-G-C-G-----G--C-CT-T-G-T----  
-----AA---G-T-C-A-----G-A-T--G--TG--A-AA-TA--C-C-AT-G-G----CT-T-AA-----C-T-G-T-G-G-G--G-G---T-G--C-A---T--T-----T--GA-A-A--C-----T--A-T--AG--G-G-C---T-T-G-A-G-T--A--C-AG----GA-G-A-----G-G-A-A--AG-T-----GG--A--ATT---  
C-C-T-A-GT--GT-A-G-CG-GT--G---A--A-A---TG-C-GT-AG--AG-A-TT--A-G--G-A-G-G-A-AC-A-CC---AG--T--G--GC-GAA-G--G-C-G-----A--C-T-T-T--CTG--G--AC-T-G-----T-A--A-C-T--GA--CG-C-T-G--A-GG--C-A-CG-A--AA-G-C---G-TG--GG-  
T--AG-C-G-AA-----CA--GG Bacteria(100);Firmicutes(100);Clostridia(100);Clostridiales(100);unclassified(100);unclassified(100);unclassified(100);unclassified(100);unclassified(100);

Otu1162 0 0 0 0 0 0 0 0 0 0 0 0 0 0 0 0 0 0 0 0 0 0 0 0 0 0 0 0  
0 0 0 0 0 0 0 0 0 0 0 0 0 0 0 0 0 0 0 0 0 0 0 0 0 0 0 0  
0 0 0 0 0 0 0 0 0 0 0 0 0 0 0 0 0 0 0 0 0 0 0 8 0 0 0 0  
0 0 0 0 0 0 0 0 0 0 0 0 0 0 0 0 0 0 0 0 0 0 0 0 0 0  
M02255\_76\_000000000-ADUNE\_1\_1103\_14176\_9331 C---TA--AC-TC-CGT-----GCC-A-G-----C--A--G---C--CG-C-GGT-AA-----TA-C--G-G--AG-GG-----TC--C---AA-GC-GT-TA-----T-CC-G-G--A-----A--T-C--A-T-T-----AA---  
G-T-C-A-----G-T-G--G--TG--A-AA-TC--T-C-TT-G-G----CT-T-AA-----C-C-A-A-G-A-A--A-T---T-G--C-C---A--T-----T--GA-A-A--C-----T--A-C--TA-G-T-C---T-T-G-A-A-T--T--C-GG----TC-G-A-----A-G-T-G---GG-C-----GG--A--ATG---T-G-T-C-AT--  
GT-A-G-CG-GT--G---A--A-A---TG-C-AT-AG--AT-A-TG--A-C--A-C-A-G-A-AC-A-CC---GA--T--A--GC-GAA-G--G-C-A-----G--C-T-C-A---CTA--G--GC-C-T-----G-A--A-T-T--GA--CG-C-T-C--A-GG--G-A-CG-A--AA-G-C---G-TG--GG-G--AG-C-G-  
AA-----CA--GG Bacteria(100);Bacteroidetes(100);Flavobacteria(100);Flavobacteriales(100);Cryomorphaceae(100);unclassified(100);unclassified(100);unclassified(100);unclassified(100);

Otu1163 0 0 0 0 0 0 0 0 0 0 0 0 0 0 0 0 0 0 0 0 0 0 0 0 0 0 0 0  
0 0 0 0 0 0 0 0 0 0 0 0 0 0 0 0 0 0 0 0 0 0 0 0 0 0 0 0  
0 0 0 0 0 0 0 0 0 0 0 0 0 0 0 0 0 0 0 0 0 0 0 1 0 0 0 0  
1 0 0 0 0 0 0 0 0 0 0 0 0 0 0 0 15 0 0 0 0 0 0 0 0 0 0  
M02255\_76\_000000000-ADUNE\_1\_1108\_14998\_24345 T---AA--GC-AC-CGG-----CTA-A-C-----T--A--C---G--TG-C-CAG-CA-----GC-C--G-C--GG-TA-----AT--A----CG-TA-GG-GT-----G-CA-A-G-C-G-----T--TAAT-C-G-G----  
-----AA---G-C-C-A-----G-A-T--G--TG--A-AA-TC--C-C-CA-A-G----CT-T-AA-----C-T-T-G-G-G-A--C-G---T-G--C-A---T--T-----T--GG-A-A--C-----T--G-G--GT--G-A-C---T-A-G-A-G-T--G---T-GT-----CA-G-A-----G-G-G-A--GG-T-----AG--A--ATT---C-  
C-A-C-AT--GT-A-G-CG-GT--G---G--A-A---TG-C-GT-AG--AG-A-TG--T-G--G-A-G-G-A-AT-A-CC---GA--T--G--GC-GAA-G--G-C-A-----G--C-C-T-C---CTG--G--GA-T-A-----A-C--A-C-T--GA--CG-T-T-G--A-GG--C-T-CG-A--AA-G-C---G-TG--GG-  
G--AG-C-A-AA-----CA--GG Bacteria(100);Proteobacteria(100);unclassified(100);unclassified(100);unclassified(100);unclassified(100);unclassified(100);unclassified(100);

Otu1164 0 0 0 0 0 0 0 0 0 0 0 0 0 0 0 0 0 0 0 0 0 0 0 0 0 0 0 0  
0 0 0 0 0 0 0 0 0 0 0 0 0 0 0 0 0 0 0 0 0 0 0 0 0 0 0 0  
0 0 0 0 0 0 0 0 0 0 0 0 0 0 0 0 0 0 0 0 0 0 0 13 0 0 0 0  
0 0 0 0 0 0 0 0 0 0 0 0 0 0 0 0 0 0 0 0 0 0 0 0 0 0  
M02255\_76\_000000000-ADUNE\_1\_1110\_24028\_7088 C---GG--CT-AA-CTC-----CGT-G-C-----C--A--G---C--AG-C-CGC-GG-----TA-A--T-A--CG-GA-----GG--A----TC-CG-AG-CG-----T-TA-T-C-C-G-----GA-T-TT-A-T-T-----AA--  
--G-T-C-A-----G-G-G--G--TG--A-AA-GA--C-G-GT-A-G----CT-A-AA-----C-T-A-T-C-G-C--A-G---T-G--C-C---T--T-----T--GA-T-A--C-----T--G-A--AG--A-G-C---T-T-G-A-A-T--A--C-AC----TT-G-A-----G-G-T-A--GG-C-----GG--A--ATG---T-G-A-C-  
AA--GT-A-G-CG-GT--G---A--A-A---TG-C-AT-AG--AT-A-TG--T-C--A-C-A-G-A-AC-A-CC---AA--T--T--GC-GAA-G--G-C-A-----G--C-T-T-A---CTA--A--AG-T-G-----T-G--A-T-T--GA--CG-C-T-G--A-GG--C-A-CG-A--AA-G-C---G-TG--GG-G--AT-C-  
A-AA-----CA--GG Bacteria(100);Bacteroidetes(100);Sphingobacteria(100);Sphingobacteriales(100);Sphingobacteriaceae(100);Sphingobacteriaceae(100);unclassified(100);unclassified(100);unclassified(100);



|                                                                                                                                                                                                                    |                                                                                                                                                                                      |   |   |   |   |   |   |   |   |   |   |   |   |   |   |   |   |   |   |   |   |    |    |   |   |   |  |  |
|--------------------------------------------------------------------------------------------------------------------------------------------------------------------------------------------------------------------|--------------------------------------------------------------------------------------------------------------------------------------------------------------------------------------|---|---|---|---|---|---|---|---|---|---|---|---|---|---|---|---|---|---|---|---|----|----|---|---|---|--|--|
| Otu1165                                                                                                                                                                                                            | 0                                                                                                                                                                                    | 0 | 0 | 0 | 0 | 0 | 0 | 0 | 0 | 0 | 0 | 0 | 0 | 0 | 0 | 0 | 0 | 0 | 0 | 0 | 0 | 0  | 0  | 0 | 0 | 0 |  |  |
|                                                                                                                                                                                                                    | 0                                                                                                                                                                                    | 0 | 0 | 0 | 0 | 0 | 0 | 0 | 0 | 0 | 0 | 0 | 0 | 0 | 0 | 0 | 0 | 0 | 0 | 0 | 0 | 0  | 0  | 0 | 0 | 0 |  |  |
|                                                                                                                                                                                                                    | 0                                                                                                                                                                                    | 0 | 0 | 0 | 0 | 0 | 0 | 0 | 0 | 0 | 0 | 0 | 0 | 0 | 0 | 0 | 0 | 0 | 0 | 0 | 0 | 0  | 32 | 0 | 0 | 0 |  |  |
|                                                                                                                                                                                                                    | 0                                                                                                                                                                                    | 0 | 0 | 0 | 0 | 0 | 0 | 0 | 0 | 0 | 0 | 0 | 0 | 0 | 0 | 0 | 0 | 0 | 0 | 0 | 0 | 0  | 0  | 0 | 0 | 0 |  |  |
| M02255_76_00000000-ADUNE_1_1113_24540_18763                                                                                                                                                                        | C---GG---CT-AA-CTC-----CGT-G-C----C-A-A-G--C-AG-C-CGC-GG-----TA-A-T-A-CG-GA-----GG-A----TC-CA-AG-CG-----T-TA-T-C-C-G-----G-A-TT-TAT-T-----                                           |   |   |   |   |   |   |   |   |   |   |   |   |   |   |   |   |   |   |   |   |    |    |   |   |   |  |  |
| -----AA-----G-T-C-A-----G-G-G--G--TG--A-AA-GA--C-G-GT-G-G-----CT-C-AA-----C-C-A-T-C-G-C-A-G---T-G--C-C--C-T-----T-GA-T-A--C-----T-G-A-AG--A-G-C---T-T-G-A-A-T-G--G-AC---TA-G-A-----G-G-T-A--GG-C-----GG-A-ATG---T- |                                                                                                                                                                                      |   |   |   |   |   |   |   |   |   |   |   |   |   |   |   |   |   |   |   |   |    |    |   |   |   |  |  |
| G-A-C-AA--GT-A-G-CG-GT--G---A-A-A---TG-C-AT-AG--AT-A-TG--T-C--A-C-A-G-A-AC-A-CC--GA-T-T-T-GC-GAA-G-G-C-A-----G-C-T-T-A--CTA--T-GG-T-T-----T-T--A-T-T-GA-CG-C-T-G--A-GG--C-A-CG-A-AA-G-C--G-TG--GG-G--              |                                                                                                                                                                                      |   |   |   |   |   |   |   |   |   |   |   |   |   |   |   |   |   |   |   |   |    |    |   |   |   |  |  |
| AT-C-A-AA-----CA--GG                                                                                                                                                                                               | Bacteria(100);Bacteroidetes(100);Sphingobacteria(100);Sphingobacteriales(100);Sphingobacteriaceae(100);Sphingobacteriaceae(100);Pedobacter(100);unclassified(100);unclassified(100); |   |   |   |   |   |   |   |   |   |   |   |   |   |   |   |   |   |   |   |   |    |    |   |   |   |  |  |
| Otu1166                                                                                                                                                                                                            | 0                                                                                                                                                                                    | 0 | 0 | 0 | 0 | 0 | 0 | 0 | 0 | 0 | 0 | 0 | 0 | 0 | 0 | 0 | 0 | 0 | 0 | 0 | 0 | 0  | 0  | 0 | 0 | 0 |  |  |
|                                                                                                                                                                                                                    | 0                                                                                                                                                                                    | 0 | 0 | 0 | 0 | 0 | 0 | 0 | 0 | 0 | 0 | 0 | 0 | 0 | 0 | 0 | 0 | 0 | 0 | 0 | 0 | 0  | 0  | 0 | 0 | 0 |  |  |
|                                                                                                                                                                                                                    | 0                                                                                                                                                                                    | 0 | 0 | 0 | 0 | 0 | 0 | 0 | 0 | 0 | 0 | 0 | 0 | 0 | 0 | 0 | 0 | 0 | 0 | 0 | 0 | 0  | 35 | 0 | 0 | 0 |  |  |
|                                                                                                                                                                                                                    | 0                                                                                                                                                                                    | 0 | 0 | 0 | 0 | 0 | 0 | 0 | 0 | 0 | 0 | 0 | 0 | 0 | 0 | 0 | 0 | 0 | 0 | 0 | 0 | 0  | 0  | 0 | 0 | 0 |  |  |
| M02255_77_00000000-ADUT3_1_1101_24464_5674                                                                                                                                                                         | T---AC--GT-AG-GGG-----CCG-A-G-----C-G-T---T-GT-C-CGG-AG-----TT-A-T-T-GG-GC-----GT-A----AA-GC-GC-GC-----G-CA-G-G-C-G-----G-C-TT-C-A-C-----GC-                                         |   |   |   |   |   |   |   |   |   |   |   |   |   |   |   |   |   |   |   |   |    |    |   |   |   |  |  |
| ---G-C-C-C-----G-A-C-G--TG--A-AA-GC--C-C-CC-G-G-----CT-T-AA-----C-C-G-G-G-G-A-G-A--G-T-C-G--T-T-----G--GG-G-A--C-----G-G-T-GG--A-G-C---T-T-G-A-G-G--G--C-GG---GA-G-A-----G-G-T-C--GG-T-----GG-A-ATT---C-C-C-       |                                                                                                                                                                                      |   |   |   |   |   |   |   |   |   |   |   |   |   |   |   |   |   |   |   |   |    |    |   |   |   |  |  |
| G-GT--GT-A-G-TG-GT--G---A-A-A---TG-C-GT-AG--AG-A-TC--G-G-G-A-G-G-A-AC-A-CC--TG--T-G--GC-GAA-G-G-C-G-----G-C-C-G-A--CTG-G-GC-C-G-----A-C--C-C-T-GA-CG-C-T-G--A-GG--C-G-CG-A-AG-G-C--G-TG--GG-G--                    |                                                                                                                                                                                      |   |   |   |   |   |   |   |   |   |   |   |   |   |   |   |   |   |   |   |   |    |    |   |   |   |  |  |
| AG-C-G-AA-----CG--GG                                                                                                                                                                                               | Bacteria(100);Chloroflexi(100);Thermomicrobia(100);unclassified(100);unclassified(100);unclassified(100);unclassified(100);unclassified(100);unclassified(100);                      |   |   |   |   |   |   |   |   |   |   |   |   |   |   |   |   |   |   |   |   |    |    |   |   |   |  |  |
| Otu1167                                                                                                                                                                                                            | 0                                                                                                                                                                                    | 0 | 0 | 0 | 0 | 0 | 0 | 0 | 0 | 0 | 0 | 0 | 0 | 0 | 0 | 0 | 0 | 0 | 0 | 0 | 0 | 0  | 0  | 0 | 0 | 0 |  |  |
|                                                                                                                                                                                                                    | 0                                                                                                                                                                                    | 0 | 0 | 0 | 0 | 0 | 0 | 0 | 0 | 0 | 0 | 0 | 0 | 0 | 0 | 0 | 0 | 0 | 0 | 0 | 0 | 0  | 0  | 0 | 0 | 0 |  |  |
|                                                                                                                                                                                                                    | 0                                                                                                                                                                                    | 0 | 0 | 0 | 0 | 0 | 0 | 0 | 0 | 0 | 0 | 0 | 0 | 0 | 0 | 0 | 0 | 0 | 0 | 0 | 0 | 0  | 48 | 0 | 0 | 0 |  |  |
|                                                                                                                                                                                                                    | 0                                                                                                                                                                                    | 0 | 0 | 0 | 0 | 0 | 0 | 0 | 0 | 0 | 0 | 0 | 0 | 0 | 0 | 0 | 0 | 0 | 0 | 0 | 0 | 0  | 0  | 0 | 0 | 0 |  |  |
| M02255_77_00000000-ADUT3_1_1106_6265_5567                                                                                                                                                                          | T---AC--GT-AG-GGG-----GCG-A-G-----C-G-T---T-GT-C-CGG-AA-----TT-A-C-T-GG-GT-----GT-A----AA-GG-GC-GT-----G-TA-G-G-C-G-----G--G-TA-A-G-C-----                                           |   |   |   |   |   |   |   |   |   |   |   |   |   |   |   |   |   |   |   |   |    |    |   |   |   |  |  |
| AA---G-T-T-A-----T-C-G--G--TA--A-AA-AC--C-C-AG-G-G-----CT-C-AA-----C-C-T-T-G-G-G-C-C---T-G--C-C--G-A-----T-AA-A-A--C-----T-G-C-AT--A-C-C---T-T-G-A-G-T-G--C-AG---GA-G-A-----G-G-G-G--AG-T-----GG--A-ATT---C-C-C-   |                                                                                                                                                                                      |   |   |   |   |   |   |   |   |   |   |   |   |   |   |   |   |   |   |   |   |    |    |   |   |   |  |  |
| G-GA--GT-A-G-CG-GT--G---A-A-A---TG-C-GT-AG--AT-A-CC--G-G--G-A-G-G-A-AC-A-CC--GG--T-G--GC-GAA-G-G-C-G-----G-C-T-C-C--CTG-G--CC-T-G-----T-A--A-C-T-GA-CG-C-T-G--A-GG--C-G-CG-A-AA-G-C--T-GG--GG-G--                  |                                                                                                                                                                                      |   |   |   |   |   |   |   |   |   |   |   |   |   |   |   |   |   |   |   |   |    |    |   |   |   |  |  |
| AG-C-G-AA-----CG--GG                                                                                                                                                                                               | Bacteria(100);Firmicutes(100);Clostridia(100);unclassified(100);unclassified(100);unclassified(100);unclassified(100);unclassified(100);unclassified(100);                           |   |   |   |   |   |   |   |   |   |   |   |   |   |   |   |   |   |   |   |   |    |    |   |   |   |  |  |
| Otu1168                                                                                                                                                                                                            | 0                                                                                                                                                                                    | 0 | 0 | 0 | 0 | 0 | 0 | 0 | 0 | 0 | 0 | 0 | 0 | 0 | 0 | 0 | 0 | 0 | 0 | 0 | 0 | 0  | 0  | 0 | 0 | 0 |  |  |
|                                                                                                                                                                                                                    | 0                                                                                                                                                                                    | 0 | 0 | 0 | 0 | 0 | 0 | 0 | 0 | 0 | 0 | 0 | 0 | 0 | 0 | 0 | 0 | 0 | 0 | 0 | 0 | 0  | 0  | 0 | 0 | 0 |  |  |
|                                                                                                                                                                                                                    | 0                                                                                                                                                                                    | 0 | 0 | 0 | 0 | 0 | 0 | 0 | 0 | 0 | 0 | 0 | 0 | 0 | 0 | 0 | 0 | 0 | 0 | 0 | 0 | 0  | 25 | 0 | 0 | 0 |  |  |
|                                                                                                                                                                                                                    | 0                                                                                                                                                                                    | 0 | 0 | 0 | 0 | 0 | 0 | 0 | 0 | 0 | 0 | 0 | 0 | 0 | 0 | 0 | 0 | 0 | 0 | 0 | 0 | 0  | 0  | 0 | 0 | 0 |  |  |
| M02255_77_00000000-ADUT3_1_1115_19830_9736                                                                                                                                                                         | T---AC--GA-AG-GGG-----GCT-A-G-----C-G-T---T-GT-T-CGG-AA-----TT-A-C-T-GG-GC-----GT-A----AA-GC-GC-GC-----G-TA-G-G-C-G-----G--A-TT-T-G-C-----CA-                                        |   |   |   |   |   |   |   |   |   |   |   |   |   |   |   |   |   |   |   |   |    |    |   |   |   |  |  |
| ---G-T-C-A-----G-G-G--G--TG--A-AA-TG--C-C-AG-G-G-----CT-T-AA-----C-C-T-T-G-G-A-A-C---T-G--C-C--T-T-----T-GA-T-A--C-----T-G-C-AA-G-T-C---T-G-G-A-G-T-A--C-GG---GA-G-A-----G-G-T-G--AG-T-----GG--A-ATT---C-C-G-A-    |                                                                                                                                                                                      |   |   |   |   |   |   |   |   |   |   |   |   |   |   |   |   |   |   |   |   |    |    |   |   |   |  |  |
| GT--GT-A-G-AG-GT--G---A-A-A---TT-C-GT-AG--AT-A-TT--C-G--G-A-G-G-A-AC-A-CC--AG--A-A--GC-GAA-G-G-C-G-----G-C-T-C-A--CTG-G--CC-C-G-----A-T--A-C-T-GA-CG-C-T-G--A-GG--C-G-CG-A-AA-G-C--G-TG--GG-G--AG-                 |                                                                                                                                                                                      |   |   |   |   |   |   |   |   |   |   |   |   |   |   |   |   |   |   |   |   |    |    |   |   |   |  |  |
| C-A-AA-----CA--GG                                                                                                                                                                                                  | Bacteria(100);Proteobacteria(100);Alphaproteobacteria(100);unclassified(100);unclassified(100);unclassified(100);unclassified(100);unclassified(100);unclassified(100);              |   |   |   |   |   |   |   |   |   |   |   |   |   |   |   |   |   |   |   |   |    |    |   |   |   |  |  |
| Otu1169                                                                                                                                                                                                            | 0                                                                                                                                                                                    | 0 | 0 | 0 | 0 | 0 | 0 | 0 | 0 | 0 | 0 | 0 | 0 | 0 | 0 | 0 | 0 | 0 | 0 | 0 | 0 | 0  | 0  | 0 | 0 | 0 |  |  |
|                                                                                                                                                                                                                    | 0                                                                                                                                                                                    | 0 | 0 | 0 | 0 | 0 | 0 | 0 | 0 | 0 | 0 | 0 | 0 | 0 | 0 | 0 | 0 | 0 | 0 | 0 | 0 | 0  | 0  | 0 | 0 | 0 |  |  |
|                                                                                                                                                                                                                    | 0                                                                                                                                                                                    | 0 | 0 | 0 | 0 | 0 | 0 | 0 | 0 | 0 | 0 | 0 | 0 | 0 | 0 | 0 | 0 | 0 | 0 | 0 | 0 | 17 | 0  | 0 | 0 | 0 |  |  |
|                                                                                                                                                                                                                    | 0                                                                                                                                                                                    | 0 | 0 | 0 | 0 | 0 | 0 | 0 | 0 | 0 | 0 | 0 | 0 | 0 | 0 | 0 | 0 | 0 | 0 | 0 | 0 | 0  | 0  | 0 | 0 | 0 |  |  |
| M02255_77_00000000-ADUT3_1_2111_9923_6958                                                                                                                                                                          | T---AC--GG-AG-GGA-----GCT-A-G-----C-G-T---T-GT-T-CGG-AA-----TT-A-C-T-GG-GC-----GT-A----AA-GC-GC-AC-----G-TA-G-G-C-G-----G--C-TA-T-T-T-----AA-                                        |   |   |   |   |   |   |   |   |   |   |   |   |   |   |   |   |   |   |   |   |    |    |   |   |   |  |  |
| ---G-T-C-A-----G-G-G--G--TG--A-AA-TC--C-C-GG-G-G-----CT-C-AA-----C-C-C-C-G-G-A-A-C---T-G--C-C--T-C-----T-GA-A-A--C-----T-G-G-AT--A-G-C---T-A-G-A-A-T-C---T-TG---GA-G-A-----G-G-T-C--AG-T-----GG--A-ATT---C-C-G-A-  |                                                                                                                                                                                      |   |   |   |   |   |   |   |   |   |   |   |   |   |   |   |   |   |   |   |   |    |    |   |   |   |  |  |
| GT--GT-A-G-AG-GT--G---A-A-A---TT-C-GT-AG--AT-A-TT--C-G--G-A-G-G-A-AC-A-CC--AG--T-G--GC-GAA-G-G-C-G-----A-C-T-G-A--CTG-G--AC-A-A-----G-T--A-T-T-GA-CG-C-T-G--A-GG--T-G-CG-A-AA-G-C--G-TG--GG-G--AG-                 |                                                                                                                                                                                      |   |   |   |   |   |   |   |   |   |   |   |   |   |   |   |   |   |   |   |   |    |    |   |   |   |  |  |
| C-A-AA-----CA--GG                                                                                                                                                                                                  | Bacteria(100);Proteobacteria(100);Alphaproteobacteria(100);Sphingomonadales(100);unclassified(100);unclassified(100);unclassified(100);unclassified(100);unclassified(100);          |   |   |   |   |   |   |   |   |   |   |   |   |   |   |   |   |   |   |   |   |    |    |   |   |   |  |  |



[illegible]



|                                                                                                                                                                                                                           |   |   |   |   |   |   |   |   |   |   |   |   |   |   |   |   |   |   |   |   |   |   |   |   |    |    |   |   |
|---------------------------------------------------------------------------------------------------------------------------------------------------------------------------------------------------------------------------|---|---|---|---|---|---|---|---|---|---|---|---|---|---|---|---|---|---|---|---|---|---|---|---|----|----|---|---|
| Otu1175                                                                                                                                                                                                                   | 0 | 0 | 0 | 0 | 0 | 0 | 0 | 0 | 0 | 0 | 0 | 0 | 0 | 0 | 0 | 0 | 0 | 0 | 0 | 0 | 0 | 0 | 0 | 0 | 0  | 0  | 0 |   |
|                                                                                                                                                                                                                           | 0 | 0 | 0 | 0 | 0 | 0 | 0 | 0 | 0 | 0 | 0 | 0 | 0 | 0 | 0 | 0 | 0 | 0 | 0 | 0 | 0 | 0 | 0 | 0 | 0  | 0  | 0 |   |
|                                                                                                                                                                                                                           | 0 | 0 | 0 | 0 | 0 | 0 | 0 | 0 | 0 | 0 | 0 | 0 | 0 | 0 | 0 | 0 | 0 | 0 | 0 | 0 | 0 | 0 | 0 | 0 | 12 | 11 | 0 | 0 |
|                                                                                                                                                                                                                           | 0 | 0 | 0 | 0 | 0 | 0 | 0 | 0 | 0 | 0 | 0 | 0 | 0 | 0 | 0 | 0 | 0 | 0 | 0 | 0 | 0 | 0 | 0 | 0 | 0  | 0  |   |   |
| M02255_76_000000000-ADUNE_1_1103_6870_15631 .....AC---TC-CG-TG-----CCA-G-C-----A-G--C---C-GC-G-GTA-AT-----AC-G--G-A-GG-GT-----GC--A----AG-CG-TT-AT-----C-CG-G-A-T-G-----G--A-CT-T-G-T-----AA----                          |   |   |   |   |   |   |   |   |   |   |   |   |   |   |   |   |   |   |   |   |   |   |   |   |    |    |   |   |
| G-T-C-C-----G-T-G--G-TG--A-AA-TC--T-C-CG-A-G----CT-T-AA-----C-T-C-G-G-A-A-A-C---T-G-C-C---A-T-----G-GA-T-A---C-----T--A-T--AG--G-T-C---T-T-G-A-A-T--G--T-TG----TG-G-A-----G-G-T-T---AG-C-----GG--A--ATA---G-T-T-C-AT--    |   |   |   |   |   |   |   |   |   |   |   |   |   |   |   |   |   |   |   |   |   |   |   |   |    |    |   |   |
| GT-A-G-CG-GT--G---A--A---TG-C-TT-AG--AT-A-TG--A-C--C-T-A-G-A-AC-A-CC--GA--T--T-GC-GAA-G--G-C-A-----G--C-T-G-G---CTA--C--AC-A-A-----C-G---A-T-T--GA--CG-C-T-G--A-GG--C-A-CG-A--AA-G-C---G-TG--GG-G--AT-C-A-                |   |   |   |   |   |   |   |   |   |   |   |   |   |   |   |   |   |   |   |   |   |   |   |   |    |    |   |   |
| AA-----CA--GG      Bacteria(100);Bacteroidetes(100);Sphingobacteria(100);Sphingobacteriales(100);Chitinophagaceae(100);unclassified(100);unclassified(100);unclassified(100);unclassified(100);                           |   |   |   |   |   |   |   |   |   |   |   |   |   |   |   |   |   |   |   |   |   |   |   |   |    |    |   |   |
| Otu1176                                                                                                                                                                                                                   | 0 | 0 | 0 | 0 | 0 | 0 | 0 | 0 | 0 | 0 | 0 | 0 | 0 | 0 | 0 | 0 | 0 | 0 | 0 | 0 | 0 | 0 | 0 | 0 | 0  | 0  | 0 |   |
|                                                                                                                                                                                                                           | 0 | 0 | 0 | 0 | 0 | 0 | 0 | 0 | 0 | 0 | 0 | 0 | 0 | 0 | 0 | 0 | 0 | 0 | 0 | 0 | 0 | 0 | 0 | 0 | 0  | 0  | 0 |   |
|                                                                                                                                                                                                                           | 0 | 0 | 0 | 0 | 0 | 0 | 0 | 0 | 0 | 0 | 0 | 0 | 0 | 0 | 0 | 0 | 0 | 0 | 0 | 0 | 0 | 0 | 0 | 0 | 14 | 0  | 0 | 0 |
|                                                                                                                                                                                                                           | 0 | 0 | 0 | 0 | 0 | 0 | 0 | 0 | 0 | 0 | 0 | 0 | 0 | 0 | 0 | 0 | 0 | 0 | 0 | 0 | 0 | 0 | 0 | 0 | 0  | 0  |   |   |
| M02255_77_000000000-ADUT3_1_2112_15558_24875      G---AC--GA-AC-CGT-----GCG-A-A-----C-G--T---T-GT-T-CGG-AA-----TC-A--C-T--GG-GC-----TT--A----AA-GG-GC-GC-----G-C-T-----G---C-----C-----                                   |   |   |   |   |   |   |   |   |   |   |   |   |   |   |   |   |   |   |   |   |   |   |   |   |    |    |   |   |
| AA---G-T-C-T-----G-G-G--G-TG--A-AA-TC--C-T-CC-G-G----CT-C-AA-----C-C-G-G-A-G-A--A-C---G-G--C-C---T-C-----G-GA-T-A---C-----T--G-G--CG--G-T-C---T-C-G-A-G-G--G--A-GG---TA-G-G-----G-G-C-G--TG-C-----GG--A--ACT---A-A-       |   |   |   |   |   |   |   |   |   |   |   |   |   |   |   |   |   |   |   |   |   |   |   |   |    |    |   |   |
| G-G-GT--GG-A-G-CG-GT--G---A--A---TG-C-GT-TG--AT-A-TC--C-T--T-A-G-G-A-AC-T-CC--GG--T--G--GC-GAA-G--G-C-G-----G--C-A-C-G---CTG--G--AC-C-T-----C-T---T-C-T--GA--CG-C-T-G--A-GG--C-G-CG-A--AA-G-C---C-AG--GG-G--              |   |   |   |   |   |   |   |   |   |   |   |   |   |   |   |   |   |   |   |   |   |   |   |   |    |    |   |   |
| AG-C-A-AA-----CG--GG      Bacteria(100);unclassified(100);unclassified(100);unclassified(100);unclassified(100);unclassified(100);unclassified(100);unclassified(100);unclassified(100);                                  |   |   |   |   |   |   |   |   |   |   |   |   |   |   |   |   |   |   |   |   |   |   |   |   |    |    |   |   |
| Otu1177                                                                                                                                                                                                                   | 0 | 0 | 0 | 0 | 0 | 0 | 0 | 0 | 0 | 0 | 0 | 0 | 0 | 0 | 0 | 0 | 0 | 0 | 0 | 0 | 0 | 0 | 0 | 0 | 0  | 0  | 0 |   |
|                                                                                                                                                                                                                           | 0 | 0 | 0 | 0 | 0 | 0 | 0 | 0 | 0 | 0 | 0 | 0 | 0 | 0 | 0 | 0 | 0 | 0 | 0 | 0 | 0 | 0 | 0 | 0 | 0  | 0  | 0 |   |
|                                                                                                                                                                                                                           | 0 | 0 | 0 | 0 | 0 | 0 | 0 | 0 | 0 | 0 | 0 | 0 | 0 | 0 | 0 | 0 | 0 | 0 | 0 | 0 | 0 | 0 | 7 | 0 | 0  | 0  | 0 | 0 |
|                                                                                                                                                                                                                           | 0 | 0 | 0 | 0 | 0 | 0 | 0 | 0 | 0 | 0 | 0 | 0 | 0 | 0 | 0 | 0 | 0 | 0 | 0 | 0 | 0 | 0 | 0 | 0 | 0  | 0  |   |   |
| M02255_77_000000000-ADUT3_1_1107_10657_15376      T---AC--GA-AG-GGG-----GCT-A-G-----C-G--T---T-GT-T-CGG-AT-----TT-A--C-T--GG-GC-----GT--A----AA-GC-GC-AC-----G-TA-G-G-C-G-----G--A-TT-G-G-T-----                          |   |   |   |   |   |   |   |   |   |   |   |   |   |   |   |   |   |   |   |   |   |   |   |   |    |    |   |   |
| -----CA---G-T-T-A-----G-G-G--G-TG--A-AA-TC--C-C-AG-G-G----CT-T-AA-----C-C-C-T-G-G-A--A-C---T-G--C-C---T-T-----T--AA-T-A---C-----T--G-C--CA--G-T-C---T-T-G-A-G-T--A--T-GG---AA-G-A-----G-G-T-G---AG-T-----GG--A--ATT---G-  |   |   |   |   |   |   |   |   |   |   |   |   |   |   |   |   |   |   |   |   |   |   |   |   |    |    |   |   |
| C-G-A-GT--GT-A-G-AG-GT--G---A--A---TT-C-GT-AG--AT-A-TT--C-G--C-A-G-G-A-AC-A-CC--AG--T--G--GC-GAA-G--G-C-G-----G--C-T-C-A---CTG--G--TC-C-A-----T-T---A-C-T--GA--CG-C-T-G--A-GG--T-G-CG-A--AA-G-C---G-TG--GG-G-             |   |   |   |   |   |   |   |   |   |   |   |   |   |   |   |   |   |   |   |   |   |   |   |   |    |    |   |   |
| -AG-C-A-AA-----CA--GG      Bacteria(100);Proteobacteria(100);Alphaproteobacteria(100);Rhizobiales(100);unclassified(100);unclassified(100);unclassified(100);unclassified(100);unclassified(100);                         |   |   |   |   |   |   |   |   |   |   |   |   |   |   |   |   |   |   |   |   |   |   |   |   |    |    |   |   |
| Otu1178                                                                                                                                                                                                                   | 0 | 0 | 0 | 0 | 0 | 0 | 0 | 0 | 0 | 0 | 0 | 0 | 0 | 0 | 0 | 0 | 0 | 0 | 0 | 0 | 0 | 0 | 0 | 0 | 0  | 0  | 0 |   |
|                                                                                                                                                                                                                           | 0 | 0 | 0 | 0 | 0 | 0 | 0 | 0 | 0 | 0 | 0 | 0 | 0 | 0 | 0 | 0 | 0 | 0 | 0 | 0 | 0 | 0 | 0 | 0 | 0  | 0  | 0 |   |
|                                                                                                                                                                                                                           | 0 | 0 | 0 | 0 | 0 | 0 | 0 | 0 | 0 | 0 | 0 | 0 | 0 | 0 | 0 | 0 | 0 | 0 | 0 | 0 | 0 | 4 | 0 | 0 | 0  | 0  | 0 | 0 |
|                                                                                                                                                                                                                           | 0 | 0 | 0 | 0 | 0 | 0 | 0 | 0 | 0 | 0 | 0 | 0 | 0 | 0 | 0 | 0 | 0 | 0 | 0 | 0 | 0 | 0 | 0 | 0 | 0  | 0  |   |   |
| M02255_77_000000000-ADUT3_1_1117_14677_23567      T---AC--GA-AG-GGG-----GCT-A-G-----C-G--T---T-GC-T-CGG-AA-----TC-A--C-T--GG-GC-----GT--A----AA-GG-GC-GC-----G-TA-G-G-C-G-----G--A-TC-T-T-T-----                          |   |   |   |   |   |   |   |   |   |   |   |   |   |   |   |   |   |   |   |   |   |   |   |   |    |    |   |   |
| -----AA---G-T-C-G-----G-G-G--G-TG--A-AA-GC--C-C-AG-G-G----CT-C-AA-----C-C-C-T-G-G-A--A-T---T-G--C-C---T-T-----C--GA-T-A---C-----T--G-A--AG--A-T-C---T-T-G-A-G-A--C---C-GG---AA-G-A-----G-G-T-T---AG-T-----GG--A--ACG---   |   |   |   |   |   |   |   |   |   |   |   |   |   |   |   |   |   |   |   |   |   |   |   |   |    |    |   |   |
| G-C-G-A-GT--GT-A-G-AG-GT--G---A--A---TT-C-GT-AG--AT-A-TT--C-G--C-A-A-G-A-AC-A-CC--AG--T--G--GC-GAA-G--G-C-G-----G--C-T-A-A---CTG--G--TC-C-G-----G-T---T-C-T--GA--CG-C-T-G--A-GG--C-G-CG-A--AA-G-C---G-TG--GG-             |   |   |   |   |   |   |   |   |   |   |   |   |   |   |   |   |   |   |   |   |   |   |   |   |    |    |   |   |
| G--AG-C-A-AA-----CA--GG      Bacteria(100);Proteobacteria(100);Alphaproteobacteria(100);Rhizobiales(100);unclassified(100);unclassified(100);unclassified(100);unclassified(100);unclassified(100);                       |   |   |   |   |   |   |   |   |   |   |   |   |   |   |   |   |   |   |   |   |   |   |   |   |    |    |   |   |
| Otu1179                                                                                                                                                                                                                   | 0 | 0 | 0 | 0 | 0 | 0 | 0 | 0 | 0 | 0 | 0 | 0 | 0 | 0 | 0 | 0 | 0 | 0 | 0 | 0 | 0 | 0 | 0 | 0 | 0  | 0  | 0 |   |
|                                                                                                                                                                                                                           | 0 | 0 | 0 | 0 | 0 | 0 | 0 | 0 | 0 | 0 | 0 | 0 | 0 | 0 | 0 | 0 | 0 | 0 | 0 | 0 | 0 | 0 | 0 | 0 | 0  | 0  | 0 |   |
|                                                                                                                                                                                                                           | 0 | 0 | 0 | 0 | 0 | 0 | 0 | 0 | 0 | 0 | 0 | 0 | 0 | 0 | 0 | 0 | 0 | 0 | 0 | 0 | 3 | 0 | 0 | 0 | 0  | 0  | 0 |   |
|                                                                                                                                                                                                                           | 0 | 0 | 0 | 0 | 0 | 0 | 0 | 0 | 0 | 0 | 0 | 0 | 0 | 0 | 0 | 0 | 0 | 0 | 0 | 0 | 0 | 0 | 0 | 0 | 0  | 0  |   |   |
| M02255_76_000000000-ADUNE_1_2110_24194_2355 T---AC--GT--G-CCA-----GCA-G-C-----C--G--C---G--GT-A-ATA-CG-----TA-G--G-G--GGCAA-----GC--G-----TT-AT-CC-GG-----A-TT-T-A-C-G-----G--T-GG-T-G-T-----AA-                          |   |   |   |   |   |   |   |   |   |   |   |   |   |   |   |   |   |   |   |   |   |   |   |   |    |    |   |   |
| ---G-T-C-A-----G-A-T--G--TG--A-AA-GC--C-C-GG-G-G----CT-C-AA-----C-C-C-C-G-G-G--A-C---T-G--C-A---T-T-----T--GA-A-A---C-----T--A-T--GT--T-G-C---T-G-G-A-G-T--G---C-AG---GA-G-A-----G-G-T-A---AG-T-----GG--A--ATT---C-C-T-A- |   |   |   |   |   |   |   |   |   |   |   |   |   |   |   |   |   |   |   |   |   |   |   |   |    |    |   |   |
| GT--GT-A-G-CG-GT--G---A--A---TG-C-GT-AG--AT-A-TT--A-G--G-A-G-G-A-AC-A-CC--AG--T--G--GC-GAA-G--G-C-G-----G--C-T-T-A---CTG--G--AC-T-G-----T-A---A-C-T--GA--CG-T-T-G--A-GG--C-T-CG-A--AA-G-C---G-TG--GG-G--AG-               |   |   |   |   |   |   |   |   |   |   |   |   |   |   |   |   |   |   |   |   |   |   |   |   |    |    |   |   |
| C-A-AA-----CA--GG      Bacteria(100);Firmicutes(100);Clostridia(100);Clostridiales(100);Lachnospiraceae(100);unclassified(100);unclassified(100);unclassified(100);unclassified(100);                                     |   |   |   |   |   |   |   |   |   |   |   |   |   |   |   |   |   |   |   |   |   |   |   |   |    |    |   |   |



|                                                                                                                                                                                                                           |   |   |   |   |   |   |   |   |   |   |   |   |   |   |   |   |   |   |   |   |    |    |   |   |   |   |   |
|---------------------------------------------------------------------------------------------------------------------------------------------------------------------------------------------------------------------------|---|---|---|---|---|---|---|---|---|---|---|---|---|---|---|---|---|---|---|---|----|----|---|---|---|---|---|
| Otu1180                                                                                                                                                                                                                   | 0 | 0 | 0 | 0 | 0 | 0 | 0 | 0 | 0 | 0 | 0 | 0 | 0 | 0 | 0 | 0 | 0 | 0 | 0 | 0 | 0  | 0  | 0 | 0 | 0 | 0 | 0 |
|                                                                                                                                                                                                                           | 0 | 0 | 0 | 0 | 0 | 0 | 0 | 0 | 0 | 0 | 0 | 0 | 0 | 0 | 0 | 0 | 0 | 0 | 0 | 0 | 0  | 0  | 0 | 0 | 0 | 0 | 0 |
|                                                                                                                                                                                                                           | 0 | 0 | 0 | 0 | 0 | 0 | 0 | 0 | 0 | 0 | 0 | 0 | 0 | 0 | 0 | 0 | 0 | 0 | 0 | 0 | 14 | 0  | 0 | 0 | 0 | 0 | 0 |
|                                                                                                                                                                                                                           | 0 | 0 | 0 | 0 | 0 | 0 | 0 | 0 | 0 | 0 | 0 | 0 | 0 | 0 | 0 | 0 | 0 | 0 | 0 | 0 | 0  | 0  | 0 | 0 | 0 |   |   |
| M02255_77_000000000-ADUT3_1_1117_22199_12525 T---AC---GG-AG-GGG-----ACT-A-G-----C-G-T---T-GT-T-CGG-AA-----TT-A-C-T--GG-GC-----GT-A---AA-GC-GT-GC-----G-TA-G-G-C-G-----G--A-TC-A-G-C-----                                  |   |   |   |   |   |   |   |   |   |   |   |   |   |   |   |   |   |   |   |   |    |    |   |   |   |   |   |
| -----AA---G-T-T-G-----G-G-G--G--TG--A-AA-TC--C-C-GG-G-G----CT-C-AA-----C-C-C-C-G-G-A-A-C---T-G-C-C---T-C-----C-AA-A-A---C-----T-G-T-TG-G-T-C---T-A-G-A-G-T--T---C-GA---GA-G-A-----G-G-T-G---AG-T-----GG--A--ATT----C-     |   |   |   |   |   |   |   |   |   |   |   |   |   |   |   |   |   |   |   |   |    |    |   |   |   |   |   |
| C-G-A-GT--GT-A-G-AG-GT--G---A--A-A---TT-C-GT-AG--AT-A-TT--C-G--G-A-G-G-A-AC-A-TC--AG--T--G--GC-GAA-G--G-C-G-----G--C-T-C-A---CTG--G--CT-C-G-----A-T---A-C-T--GA--CG-C-T-G--A-GG--T-A-CG-A--AA-G-T---G-TG--GG-G-           |   |   |   |   |   |   |   |   |   |   |   |   |   |   |   |   |   |   |   |   |    |    |   |   |   |   |   |
| -AG-C-A-AA-----CA--GG Bacteria(100);Proteobacteria(100);Alphaproteobacteria(100);Rhodobacterales(100);Rhodobacteraceae(100);unclassified(100);unclassified(100);unclassified(100);unclassified(100);                      |   |   |   |   |   |   |   |   |   |   |   |   |   |   |   |   |   |   |   |   |    |    |   |   |   |   |   |
| Otu1181                                                                                                                                                                                                                   | 0 | 0 | 0 | 0 | 0 | 0 | 0 | 0 | 0 | 0 | 0 | 0 | 0 | 0 | 0 | 0 | 0 | 0 | 0 | 0 | 0  | 0  | 0 | 0 | 0 | 0 | 0 |
|                                                                                                                                                                                                                           | 0 | 0 | 0 | 0 | 0 | 0 | 0 | 0 | 0 | 0 | 0 | 0 | 0 | 0 | 0 | 0 | 0 | 0 | 0 | 0 | 0  | 0  | 0 | 0 | 0 | 0 | 0 |
|                                                                                                                                                                                                                           | 0 | 0 | 0 | 0 | 0 | 0 | 0 | 0 | 0 | 0 | 0 | 0 | 0 | 0 | 0 | 0 | 0 | 0 | 0 | 0 | 3  | 0  | 0 | 0 | 0 | 0 | 0 |
|                                                                                                                                                                                                                           | 0 | 0 | 0 | 0 | 0 | 0 | 0 | 0 | 0 | 0 | 0 | 0 | 0 | 0 | 0 | 0 | 0 | 0 | 0 | 0 | 0  | 0  | 0 | 0 | 0 |   |   |
| M02255_77_000000000-ADUT3_1_1117_7141_14690 T---AC---GA-AG-GGG-----GCG-A-G-----C-G-T---T-GT-T-CGG-AA-----TT-A-T-T--GG-GC-----GT-A---AA-GG-GC-GC-----G-TA-G-G-C-G-----G--T-GC-G-G-T-----                                   |   |   |   |   |   |   |   |   |   |   |   |   |   |   |   |   |   |   |   |   |    |    |   |   |   |   |   |
| AA---G-A-G-T-----G-T-T--G--TG--A-AA-TC--C-T-CG-G-G----CT-C-AA-----C-T-C-G-A-G-G--C-C---T-G-C-A---A-C-----G-CT-G-A---C-----T-G-C--CG--T-G-C---T-G-G-A-G-T--G---T-GG---GA-G-A-----G-G-T-G---CG-T-----GG--A--ATT----C-C-C-   |   |   |   |   |   |   |   |   |   |   |   |   |   |   |   |   |   |   |   |   |    |    |   |   |   |   |   |
| G-GT--GT-A-G-CG-GT--G---A--A-A---TG-C-GT-AG--AT-A-TC--G-G--G-A-G-G-A-AC-A-CC--TG--T--G--GC-GAA-A--G-C-G-----G--C-G-C-A---CTG--G--AC-C-A-----C-A---A-C-T--GA--CG-C-T-G--A-GG--C-G-CG-A--AA-G-C---T-AG--GG-G--              |   |   |   |   |   |   |   |   |   |   |   |   |   |   |   |   |   |   |   |   |    |    |   |   |   |   |   |
| AG-C-A-AA-----CA--GG Bacteria(100);Acidobacteria(100);Acidobacteria(100);Acidobacteriales(100);Acidobacteriaceae(100);unclassified(100);unclassified(100);unclassified(100);unclassified(100);                            |   |   |   |   |   |   |   |   |   |   |   |   |   |   |   |   |   |   |   |   |    |    |   |   |   |   |   |
| Otu1182                                                                                                                                                                                                                   | 0 | 0 | 0 | 0 | 0 | 0 | 0 | 0 | 0 | 0 | 0 | 0 | 0 | 0 | 0 | 0 | 0 | 0 | 0 | 0 | 0  | 0  | 0 | 0 | 0 | 0 | 0 |
|                                                                                                                                                                                                                           | 0 | 0 | 0 | 0 | 0 | 0 | 0 | 0 | 0 | 0 | 0 | 0 | 0 | 0 | 0 | 0 | 0 | 0 | 0 | 0 | 0  | 0  | 0 | 0 | 0 | 0 | 0 |
|                                                                                                                                                                                                                           | 0 | 0 | 0 | 0 | 0 | 0 | 0 | 0 | 0 | 0 | 0 | 0 | 0 | 0 | 0 | 0 | 0 | 0 | 0 | 0 | 1  | 0  | 0 | 0 | 0 | 0 | 0 |
|                                                                                                                                                                                                                           | 0 | 0 | 0 | 0 | 0 | 0 | 0 | 0 | 0 | 0 | 0 | 0 | 0 | 0 | 1 | 0 | 0 | 0 | 0 | 0 | 0  | 0  | 3 | 0 | 0 | 0 |   |
| M02255_77_000000000-ADUT3_1_1105_10873_2274 C---TG--TG-CC-AGC-----AGC-C-G-----C-G-G---T-AA-TACAG-AG-----GG-G--G-C-AA-GC-----GTT-A---ATC-GG-AATTA-----C-TA-G-G-T-G-----G--C-TC-T-A-T-----                                  |   |   |   |   |   |   |   |   |   |   |   |   |   |   |   |   |   |   |   |   |    |    |   |   |   |   |   |
| AA---G-T-C-A-----G-A-T--G--TG--A-AA-TC--C-C-CG-G-G----CT-T-AA-----C-C-T-G-G-G-A-A-C---T-G-C-A---T-C-----T-GA-A-A---C-----T-G-T--AG--A-G-C---T-A-G-A-G-T--A---T-GT-----GA-G-A-----G-G-A-A---GG-T-----AG--A--ATT----C-C-A-  |   |   |   |   |   |   |   |   |   |   |   |   |   |   |   |   |   |   |   |   |    |    |   |   |   |   |   |
| G-GT--GT-A-G-CG-GT--G---A--A-A---TG-C-GT-AG--AG-A-TC--T-G--G-A-G-G-A-AT-A-CC--GA--T--G--GC-GAA-G--G-C-A-----G--C-C-T-T---CTG--G--CA-T-A-----A-T---A-C-T--GA--CA-C-T-G--A-GG--C-T-CG-A--AA-G-C---G-TG--GG-T--AG-           |   |   |   |   |   |   |   |   |   |   |   |   |   |   |   |   |   |   |   |   |    |    |   |   |   |   |   |
| C-A-AA-----CA--GG Bacteria(100);Proteobacteria(100);Gammaproteobacteria(100);Pseudomonadales(100);Moraxellaceae(100);Psychrobacter(100);unclassified(100);unclassified(100);unclassified(100);                            |   |   |   |   |   |   |   |   |   |   |   |   |   |   |   |   |   |   |   |   |    |    |   |   |   |   |   |
| Otu1183                                                                                                                                                                                                                   | 0 | 0 | 0 | 0 | 0 | 0 | 0 | 0 | 0 | 0 | 0 | 0 | 0 | 0 | 0 | 0 | 0 | 0 | 0 | 0 | 0  | 0  | 0 | 0 | 0 | 0 | 0 |
|                                                                                                                                                                                                                           | 0 | 0 | 0 | 0 | 0 | 0 | 0 | 0 | 0 | 0 | 0 | 0 | 0 | 0 | 0 | 0 | 0 | 0 | 0 | 0 | 0  | 0  | 0 | 0 | 0 | 0 | 0 |
|                                                                                                                                                                                                                           | 0 | 0 | 0 | 0 | 0 | 0 | 0 | 0 | 0 | 0 | 0 | 0 | 0 | 0 | 0 | 0 | 0 | 0 | 0 | 0 | 0  | 14 | 0 | 0 | 0 | 0 | 0 |
|                                                                                                                                                                                                                           | 0 | 0 | 0 | 0 | 0 | 0 | 0 | 0 | 0 | 0 | 0 | 0 | 0 | 0 | 0 | 0 | 0 | 0 | 0 | 0 | 0  | 0  | 0 | 0 | 0 |   |   |
| M02255_77_000000000-ADUT3_1_1104_17918_13894 T---AC---GT-AG-GTG-----GCA-A-G-----C-G-T---T-GT-C-CGG-AT-----TT-A-C-T--GG-GC-----GT-A---AA-GA-AT-GC-----G-TA-G-G-C-G-----G--A-TA-T-T-T-----                                  |   |   |   |   |   |   |   |   |   |   |   |   |   |   |   |   |   |   |   |   |    |    |   |   |   |   |   |
| -----AA---G-T-G-A-----G-A-T--G--TG--A-AA-TT--C-C-CG-G-G----CT-T-AA-----C-T-T-G-G-G-A--G-C---T-G-C-A---T-T-----T--CA-A-A---C-----T-G-G--GT--A-T-C---T-A-G-A-G-T--G---C-GG---GA-G-A-----G-G-A-A---AG-T-----GG--A--ATT----C- |   |   |   |   |   |   |   |   |   |   |   |   |   |   |   |   |   |   |   |   |    |    |   |   |   |   |   |
| C-T-A-GT--GT-A-G-CG-GT--G---A--A-A---TG-C-GT-AG--AG-A-TT--A-G--G-A-A-G-A-AC-A-CC--AG--T--G--GC-GAA-G--G-C-G-----A-C-T-T-T---CTG--G--AC-C-G-----T-A---A-C-T--GA--CG-C-T-G--A-GG--C-A-TG-A--AA-G-C---G-TG--GG-G-            |   |   |   |   |   |   |   |   |   |   |   |   |   |   |   |   |   |   |   |   |    |    |   |   |   |   |   |
| -AG-C-A-AA-----CA--GG Bacteria(100);Firmicutes(100);Clostridia(100);Clostridiales(100);Clostridiaceae(100);Clostridium(100);unclassified(100);unclassified(100);unclassified(100);                                        |   |   |   |   |   |   |   |   |   |   |   |   |   |   |   |   |   |   |   |   |    |    |   |   |   |   |   |
| Otu1184                                                                                                                                                                                                                   | 0 | 0 | 0 | 0 | 0 | 0 | 0 | 0 | 0 | 0 | 0 | 0 | 0 | 0 | 0 | 0 | 0 | 0 | 0 | 0 | 0  | 0  | 0 | 0 | 0 | 0 | 0 |
|                                                                                                                                                                                                                           | 0 | 0 | 0 | 0 | 0 | 0 | 0 | 0 | 0 | 0 | 0 | 0 | 0 | 0 | 0 | 0 | 0 | 0 | 0 | 0 | 0  | 0  | 0 | 0 | 0 | 0 | 0 |
|                                                                                                                                                                                                                           | 0 | 0 | 0 | 0 | 0 | 0 | 0 | 0 | 0 | 0 | 0 | 0 | 0 | 0 | 0 | 0 | 0 | 0 | 0 | 0 | 4  | 0  | 0 | 0 | 0 | 0 | 0 |
|                                                                                                                                                                                                                           | 0 | 0 | 0 | 0 | 0 | 0 | 0 | 0 | 0 | 0 | 0 | 0 | 0 | 0 | 0 | 0 | 0 | 0 | 0 | 0 | 0  | 0  | 0 | 0 | 0 |   |   |
| M02255_77_000000000-ADUT3_1_1102_6580_11943 T---AC---GT-AG-GGG-----GCA-A-G-----C-G-T---T-GT-C-CGG-AA-----TT-A-T-T--GG-GC-----GT-A---AA-GA-GC-TC-----G-TA-G-G-C-G-----G--T-CC-A-T-T-----AA-                                |   |   |   |   |   |   |   |   |   |   |   |   |   |   |   |   |   |   |   |   |    |    |   |   |   |   |   |
| ---G-T-C-A-----G-A-T--G--TG--A-AA-TC--T-C-AG-G-G----CT-C-AA-----C-C-C-T-G-A-G--C-C---T-G-C-A---T-C-----T-GA-T-A---C-----T-G-G--TG--G-A-C---T-T-G-A-G-G-C---A-GG---TA-G-G-----G-G-A-A---GG-T-----GG--A--ATT----C-C-T-G-    |   |   |   |   |   |   |   |   |   |   |   |   |   |   |   |   |   |   |   |   |    |    |   |   |   |   |   |
| GT--GT-A-G-CG-GT--G---A--A-A---TG-C-GC-AG--AT-A-TC--A-G--G-A-G-G-A-AC-A-CC--AG--T--G--GC-GAA-G--G-C-G-----G--C-C-T-T---CTG--G--GC-C-T-----G-T---T-C-T--GA--CG-C-T-G--A-GG--A-G-CG-A--AA-G-C---G-TG--GG-G--AG-             |   |   |   |   |   |   |   |   |   |   |   |   |   |   |   |   |   |   |   |   |    |    |   |   |   |   |   |
| C-G-AA-----CA--GG Bacteria(100);Actinobacteria(100);Actinobacteria(100);unclassified(100);unclassified(100);unclassified(100);unclassified(100);unclassified(100);unclassified(100);                                      |   |   |   |   |   |   |   |   |   |   |   |   |   |   |   |   |   |   |   |   |    |    |   |   |   |   |   |



[illegible]



|                                                                                                                                                                                                      |                                                                                                                                                                    |                                                                                                                                                                                  |   |   |   |   |   |   |   |   |   |   |   |   |   |   |   |   |   |   |   |    |   |   |   |   |  |  |
|------------------------------------------------------------------------------------------------------------------------------------------------------------------------------------------------------|--------------------------------------------------------------------------------------------------------------------------------------------------------------------|----------------------------------------------------------------------------------------------------------------------------------------------------------------------------------|---|---|---|---|---|---|---|---|---|---|---|---|---|---|---|---|---|---|---|----|---|---|---|---|--|--|
| Otu1190                                                                                                                                                                                              | 0                                                                                                                                                                  | 0                                                                                                                                                                                | 0 | 0 | 0 | 0 | 0 | 0 | 0 | 0 | 0 | 0 | 0 | 0 | 0 | 0 | 0 | 0 | 0 | 0 | 0 | 0  | 0 | 0 | 0 | 0 |  |  |
|                                                                                                                                                                                                      | 0                                                                                                                                                                  | 0                                                                                                                                                                                | 0 | 0 | 0 | 0 | 0 | 0 | 0 | 0 | 0 | 0 | 0 | 0 | 0 | 0 | 0 | 0 | 0 | 0 | 0 | 0  | 0 | 0 | 0 | 0 |  |  |
|                                                                                                                                                                                                      | 0                                                                                                                                                                  | 0                                                                                                                                                                                | 0 | 0 | 0 | 0 | 0 | 0 | 0 | 0 | 0 | 0 | 0 | 0 | 0 | 0 | 0 | 0 | 0 | 0 | 0 | 19 | 0 | 0 | 0 | 0 |  |  |
|                                                                                                                                                                                                      | 0                                                                                                                                                                  | 0                                                                                                                                                                                | 0 | 0 | 0 | 0 | 0 | 0 | 0 | 0 | 0 | 0 | 0 | 0 | 0 | 0 | 0 | 0 | 0 | 0 | 0 | 0  | 0 | 0 | 0 | 0 |  |  |
| M02255_76_000000000-ADUNE_1_1117_14636_11354                                                                                                                                                         | .....AC---T-A-CGT-----GCC-A-G----C-A-G--C-CG-C-GGT-AA-----TA-C-G-T-AG-GG-----GG-C---AA-GC-GT-----TA-T-C-C-G-----G-A-AT-A-A-T-----                                  |                                                                                                                                                                                  |   |   |   |   |   |   |   |   |   |   |   |   |   |   |   |   |   |   |   |    |   |   |   |   |  |  |
| AA---                                                                                                                                                                                                | G-T-C-T-----A-A-G--G--TT--A-AA-GT--G-C-GG-G-G----CT-C-AA-----C-C-C-C-G-T-G-A-----T-G--C-C---T--T-----G--GA-A-A--C-----T-G-T-TA-A-G-C---T-T-G-A-G-T-A--T-GG----     | TA-G-A-----G-G-C-A--AG-T-----GG-A-ATT---T-C-A-                                                                                                                                   |   |   |   |   |   |   |   |   |   |   |   |   |   |   |   |   |   |   |   |    |   |   |   |   |  |  |
| T-GT--GT-A-G-CG-GT--A--A-A-A--TG-C-GT-AA--AT-A-TA--T-G--A-A-G-G-A-AC-A-CC--AG--T--G--GC-GAA-G-G-C-G-----G--C-T-T-G--CTG-G--GC-C-A-----T-T--A-C-T-GA-CG-C-T-G--A-GG--C-A-CG-A-AA-G-C--G-TG--GG-G--AG- | C-A-AA-----CA--GG                                                                                                                                                  | Bacteria(100);Firmicutes(100);Mollicutes(100);unclassified(100);unclassified(100);unclassified(100);unclassified(100);unclassified(100);                                         |   |   |   |   |   |   |   |   |   |   |   |   |   |   |   |   |   |   |   |    |   |   |   |   |  |  |
| Otu1191                                                                                                                                                                                              | 0                                                                                                                                                                  | 0                                                                                                                                                                                | 0 | 0 | 0 | 0 | 0 | 0 | 0 | 0 | 0 | 0 | 0 | 0 | 0 | 0 | 0 | 0 | 0 | 0 | 0 | 0  | 0 | 0 | 0 | 0 |  |  |
|                                                                                                                                                                                                      | 0                                                                                                                                                                  | 0                                                                                                                                                                                | 0 | 0 | 0 | 0 | 0 | 0 | 0 | 0 | 0 | 0 | 0 | 0 | 0 | 0 | 0 | 0 | 0 | 0 | 0 | 0  | 0 | 0 | 0 | 0 |  |  |
|                                                                                                                                                                                                      | 0                                                                                                                                                                  | 0                                                                                                                                                                                | 0 | 0 | 0 | 0 | 0 | 0 | 0 | 0 | 0 | 0 | 0 | 0 | 0 | 0 | 0 | 0 | 0 | 0 | 0 | 52 | 0 | 0 | 0 | 0 |  |  |
|                                                                                                                                                                                                      | 0                                                                                                                                                                  | 0                                                                                                                                                                                | 0 | 0 | 0 | 0 | 0 | 0 | 0 | 0 | 0 | 0 | 0 | 0 | 0 | 0 | 0 | 0 | 0 | 0 | 0 | 0  | 0 | 0 | 0 | 0 |  |  |
| M02255_77_000000000-ADUT3_1_1102_24563_4474                                                                                                                                                          | T---AC--GT-AG-GTG-----GCA-A-G----C-G-T---T--AT-C-CGG-AA-----TT-A-T-T-GG-GC-----GT--A---AA-GG-GA-GC-----G-TA-G-G-C-G-----G--A-TA-T-T-T-----AA-                      |                                                                                                                                                                                  |   |   |   |   |   |   |   |   |   |   |   |   |   |   |   |   |   |   |   |    |   |   |   |   |  |  |
| ---                                                                                                                                                                                                  | G-T-G-G-----G-A-T-G--TG--A-AA-TA--C-T-TG-G-G----CT-C-AA-----C-C-C-G-A-G-T-G-C---T-G--C-A--T--T-----C--CA-A-A--C-----T-G-G-AT--A-T-C---T-A-G-A-G-T-G--C-AG----      | GA-G-A-----G-G-A-G--AG-T-----GG-A-ATT---C-C-T-A-                                                                                                                                 |   |   |   |   |   |   |   |   |   |   |   |   |   |   |   |   |   |   |   |    |   |   |   |   |  |  |
| GT--GT-A-G-CG-GT--G--A-A-A--TG-C-GT-AG--AG-A-TT--A-G--G-A-A-G-A-AC-A-CC--AG--T--G--GC-GAA-G-G-C-G-----A-C-T-C-T--CTG-G--AC-T-G-----T-A--A-C-T-GA-CG-C-T-G--A-GG--C-T-CG-A-AA-G-C--G-TG--GG-G--AG-    | C-G-AA-----CA--GG                                                                                                                                                  | Bacteria(100);Firmicutes(100);Clostridia(100);Clostridiales(100);Clostridiaceae(100);unclassified(100);unclassified(100);unclassified(100);unclassified(100);                    |   |   |   |   |   |   |   |   |   |   |   |   |   |   |   |   |   |   |   |    |   |   |   |   |  |  |
| Otu1192                                                                                                                                                                                              | 0                                                                                                                                                                  | 0                                                                                                                                                                                | 0 | 0 | 0 | 0 | 0 | 0 | 0 | 0 | 0 | 0 | 0 | 0 | 0 | 0 | 0 | 0 | 0 | 0 | 0 | 0  | 0 | 0 | 0 | 0 |  |  |
|                                                                                                                                                                                                      | 0                                                                                                                                                                  | 0                                                                                                                                                                                | 0 | 0 | 0 | 0 | 0 | 0 | 0 | 0 | 0 | 0 | 0 | 0 | 0 | 0 | 0 | 0 | 0 | 0 | 0 | 0  | 0 | 0 | 0 | 0 |  |  |
|                                                                                                                                                                                                      | 0                                                                                                                                                                  | 0                                                                                                                                                                                | 0 | 0 | 0 | 0 | 0 | 0 | 0 | 0 | 0 | 0 | 0 | 0 | 0 | 0 | 0 | 0 | 0 | 0 | 0 | 41 | 0 | 0 | 0 | 0 |  |  |
|                                                                                                                                                                                                      | 0                                                                                                                                                                  | 0                                                                                                                                                                                | 0 | 0 | 0 | 0 | 0 | 0 | 0 | 0 | 0 | 0 | 0 | 0 | 0 | 0 | 0 | 0 | 0 | 0 | 0 | 0  | 0 | 0 | 0 | 0 |  |  |
| M02255_77_000000000-ADUT3_1_1113_26250_22061                                                                                                                                                         | T---AC--GG-AG-GGG-----GCT-A-G----C-G-T---T--GT-T-CGG-AA-----TT-A-C-T-GG-GC-----GT--A---AA-GC-GC-AC-----G-TA-G-G-C-G-----G--C-TT-T-T-T-----                         |                                                                                                                                                                                  |   |   |   |   |   |   |   |   |   |   |   |   |   |   |   |   |   |   |   |    |   |   |   |   |  |  |
| ----                                                                                                                                                                                                 | AA---G-T-C-A-----G-A-G--G--TG--A-AA-GC--C-C-GG-A-G----CT-C-AA-----C-T-C-C-G-G-A-A-T---T-G--C-C---T--T-----T-GA-G-A--C-----T-G-G-AA-G-G-C---T-T-G-A-A-T-C--A-CG---- | GA-G-A-----G-G-T-G--GG-T-----GG-A-ATT---C-                                                                                                                                       |   |   |   |   |   |   |   |   |   |   |   |   |   |   |   |   |   |   |   |    |   |   |   |   |  |  |
| C-G-A-GT--GT-A-G-AG-GT--G--A-A-A--TT-C-GT-AG--AT-A-TT--C-G--G-A-A-G-A-AC-A-CC--AG--T--G--GC-GAA-G-G-C-G-----G--C-C-C-A--CTG-G--AC-G-T-----G-T--A-T-T-GA-CG-C-T-G--A-GG--T-G-CG-A-AA-G-C--G-TG--GG-   | G--AG-C-A-AA-----CA--GG                                                                                                                                            | Bacteria(100);Proteobacteria(100);Alphaproteobacteria(100);Sphingomonadales(100);Sphingomonadaceae(100);unclassified(100);unclassified(100);unclassified(100);unclassified(100); |   |   |   |   |   |   |   |   |   |   |   |   |   |   |   |   |   |   |   |    |   |   |   |   |  |  |
| Otu1193                                                                                                                                                                                              | 0                                                                                                                                                                  | 0                                                                                                                                                                                | 0 | 0 | 0 | 0 | 0 | 0 | 0 | 0 | 0 | 0 | 0 | 0 | 0 | 0 | 0 | 0 | 0 | 0 | 0 | 0  | 0 | 0 | 0 | 0 |  |  |
|                                                                                                                                                                                                      | 0                                                                                                                                                                  | 0                                                                                                                                                                                | 0 | 0 | 0 | 0 | 0 | 0 | 0 | 0 | 0 | 0 | 0 | 0 | 0 | 0 | 0 | 0 | 0 | 0 | 0 | 0  | 0 | 0 | 0 | 0 |  |  |
|                                                                                                                                                                                                      | 0                                                                                                                                                                  | 0                                                                                                                                                                                | 0 | 0 | 0 | 0 | 0 | 0 | 0 | 0 | 0 | 0 | 0 | 0 | 0 | 0 | 0 | 0 | 0 | 0 | 0 | 78 | 0 | 0 | 0 | 0 |  |  |
|                                                                                                                                                                                                      | 0                                                                                                                                                                  | 0                                                                                                                                                                                | 0 | 0 | 0 | 0 | 0 | 0 | 0 | 0 | 0 | 0 | 0 | 0 | 0 | 0 | 0 | 0 | 0 | 0 | 0 | 0  | 0 | 0 | 0 | 0 |  |  |
| M02255_77_000000000-ADUT3_1_2108_17403_9516                                                                                                                                                          | T---AC--GA-AG-GGG-----GCT-A-G----C-G-T---T--GC-T-CGG-AA-----TT-A-C-T-GG-GC-----GT--A---AA-GG-GA-GC-----G-TA-G-G-C-G-----G--A-CA-G-T-T-----                         |                                                                                                                                                                                  |   |   |   |   |   |   |   |   |   |   |   |   |   |   |   |   |   |   |   |    |   |   |   |   |  |  |
| TA---                                                                                                                                                                                                | T                                                                                                                                                                  |                                                                                                                                                                                  |   |   |   |   |   |   |   |   |   |   |   |   |   |   |   |   |   |   |   |    |   |   |   |   |  |  |



|                                                                                                                                                                                                                                                                                                                                                                                                                                                                                                                                                                                                                                                                                                                                                                                                                                                            |   |   |   |   |   |   |   |   |   |   |   |   |   |   |   |   |   |   |   |   |   |   |   |   |   |    |   |
|------------------------------------------------------------------------------------------------------------------------------------------------------------------------------------------------------------------------------------------------------------------------------------------------------------------------------------------------------------------------------------------------------------------------------------------------------------------------------------------------------------------------------------------------------------------------------------------------------------------------------------------------------------------------------------------------------------------------------------------------------------------------------------------------------------------------------------------------------------|---|---|---|---|---|---|---|---|---|---|---|---|---|---|---|---|---|---|---|---|---|---|---|---|---|----|---|
| Otu1195                                                                                                                                                                                                                                                                                                                                                                                                                                                                                                                                                                                                                                                                                                                                                                                                                                                    | 0 | 0 | 0 | 0 | 0 | 0 | 0 | 0 | 0 | 0 | 0 | 0 | 0 | 0 | 0 | 0 | 0 | 0 | 0 | 0 | 0 | 0 | 0 | 0 | 0 | 0  | 0 |
|                                                                                                                                                                                                                                                                                                                                                                                                                                                                                                                                                                                                                                                                                                                                                                                                                                                            | 0 | 0 | 0 | 0 | 0 | 0 | 0 | 0 | 0 | 0 | 0 | 0 | 0 | 0 | 0 | 0 | 0 | 0 | 0 | 0 | 0 | 0 | 0 | 0 | 0 | 0  |   |
|                                                                                                                                                                                                                                                                                                                                                                                                                                                                                                                                                                                                                                                                                                                                                                                                                                                            | 0 | 0 | 0 | 0 | 0 | 0 | 0 | 0 | 0 | 0 | 0 | 0 | 0 | 0 | 0 | 0 | 0 | 0 | 0 | 0 | 0 | 0 | 0 | 0 | 0 | 25 |   |
|                                                                                                                                                                                                                                                                                                                                                                                                                                                                                                                                                                                                                                                                                                                                                                                                                                                            | 0 | 0 | 0 | 0 | 0 | 0 | 0 | 0 | 0 | 0 | 0 | 0 | 0 | 0 | 0 | 0 | 0 | 0 | 0 | 0 | 0 | 0 | 0 | 0 | 0 |    |   |
| M02255_76_000000000-ADUNE_1_1118_8404_15380 T---CG---GC-TA-ACT-----CCG-T-GC---C-A-G---C--AG-C-CGC-GG-----TA-A-T-A--CG-GA-----GG-A----TC-CG-AG-CG-----T-TA-T-C-C-G-----GA-T-CT-A-T-T-----AA-<br>---G-T-C-A-----G-G-G--G-TG--A-AA-TA--C-G-GT-G-G----CT-C-AA-----C-C-A-T-C-G-C-A-G---T-G--C-C---T-T-----T--GA-T-A--C-----T--G-A--TG--G-G-C---T-T-G-A-A-T--C--C-AT----TT-G-A-----A-G-T-G--GG-C-----GG--A--ATA---A-G-A-C-<br>AA--GT-A-G-CG-GT--G---A--A-A---TG-C-AT-AG--AT-A-TG--T-C--T-T-A-G-A-AC-T-CC---GA--T-T--GC-GAA-G--G-C-A-----G--C-T-C-A--CTA--A--GC-T-G-----G-T--A-T-T--GA--CG-C-T-G--A-TG--C-A-CG-A--AA-G-C---G-TG--GG-G--AT-C-<br>G-AA-----CA--GG Bacteria(100);Bacteroidetes(100);Sphingobacteria(100);Sphingobacteriales(100);Sphingobacteriaceae(100);Sphingobacteriaceae(100);Sphingobacterium(100);unclassified(100);unclassified(100);        |   |   |   |   |   |   |   |   |   |   |   |   |   |   |   |   |   |   |   |   |   |   |   |   |   |    |   |
| Otu1196                                                                                                                                                                                                                                                                                                                                                                                                                                                                                                                                                                                                                                                                                                                                                                                                                                                    | 0 | 0 | 0 | 0 | 0 | 0 | 0 | 0 | 0 | 0 | 0 | 0 | 0 | 0 | 0 | 0 | 0 | 0 | 0 | 0 | 0 | 0 | 0 | 0 | 0 | 0  |   |
|                                                                                                                                                                                                                                                                                                                                                                                                                                                                                                                                                                                                                                                                                                                                                                                                                                                            | 0 | 0 | 0 | 0 | 0 | 0 | 0 | 0 | 0 | 0 | 0 | 0 | 0 | 0 | 0 | 0 | 0 | 0 | 0 | 0 | 0 | 0 | 0 | 0 | 0 | 0  |   |
|                                                                                                                                                                                                                                                                                                                                                                                                                                                                                                                                                                                                                                                                                                                                                                                                                                                            | 0 | 0 | 0 | 0 | 0 | 0 | 0 | 0 | 0 | 0 | 0 | 0 | 0 | 0 | 0 | 0 | 0 | 0 | 0 | 0 | 0 | 0 | 0 | 0 | 0 | 10 |   |
|                                                                                                                                                                                                                                                                                                                                                                                                                                                                                                                                                                                                                                                                                                                                                                                                                                                            | 0 | 0 | 0 | 0 | 0 | 0 | 0 | 0 | 0 | 0 | 0 | 0 | 0 | 0 | 0 | 0 | 0 | 0 | 0 | 0 | 0 | 0 | 0 | 0 | 0 |    |   |
| M02255_76_000000000-ADUNE_1_2101_14276_7513 C---TA--AC-TC-TGT-----GCC-A-G-----C---A--G--CC-G-CGG-TA-----AT-A--C-A--GA-GG-----GT-----GC-TA-GC-GT-----TG-T-T-C-G-----G--A-CA-G-G-C-----AA---<br>G-T-C-G-----G-G-T-G--TG--A-AA-GC--C-C-TC-A-G-----CT-T-AA-----C-T-G-A-G-G-A--A-G---T-G--C-G---C-C-----C-GA-A-A--C-----T--A-C-TT--G-G-C---T-T-G-A-G-T--A--C-CG-----GA-G-A-----G-G-G-T--GG-C-----GG--A--ATT---C-C-C-G-GT-<br>-GT-A-G-AG-GT--G---A--A-A---TT-C-GT-AG--AT-A-TC--G-G--G-A-G-G-A-AC-A-CC---AG--T--G--GC-GAA-G--G-C--G-----G--C-C-A-C---CTG--G--AC-G-G-----C-T--A-C-T--GA--CG-C-T-G--A-GA--C-G-CG-A--AA-G-C---G-TG--GG-G--AG-C-A-<br>AA-----CA--GG Bacteria(100);Proteobacteria(100);Deltaproteobacteria(100);Myxococcales(100);unclassified(100);unclassified(100);unclassified(100);unclassified(100);unclassified(100);                           |   |   |   |   |   |   |   |   |   |   |   |   |   |   |   |   |   |   |   |   |   |   |   |   |   |    |   |
| Otu1197                                                                                                                                                                                                                                                                                                                                                                                                                                                                                                                                                                                                                                                                                                                                                                                                                                                    | 0 | 0 | 0 | 0 | 0 | 0 | 0 | 0 | 0 | 0 | 0 | 0 | 0 | 0 | 0 | 0 | 0 | 0 | 0 | 0 | 0 | 0 | 0 | 0 | 0 | 0  |   |
|                                                                                                                                                                                                                                                                                                                                                                                                                                                                                                                                                                                                                                                                                                                                                                                                                                                            | 0 | 0 | 0 | 0 | 0 | 0 | 0 | 0 | 0 | 0 | 0 | 0 | 0 | 0 | 0 | 0 | 0 | 0 | 0 | 0 | 0 | 0 | 0 | 0 | 0 | 0  |   |
|                                                                                                                                                                                                                                                                                                                                                                                                                                                                                                                                                                                                                                                                                                                                                                                                                                                            | 0 | 0 | 0 | 0 | 0 | 0 | 0 | 0 | 0 | 0 | 0 | 0 | 0 | 0 | 0 | 0 | 0 | 0 | 0 | 0 | 0 | 0 | 0 | 0 | 0 | 11 |   |
|                                                                                                                                                                                                                                                                                                                                                                                                                                                                                                                                                                                                                                                                                                                                                                                                                                                            | 0 | 0 | 0 | 0 | 0 | 0 | 0 | 0 | 0 | 0 | 0 | 0 | 0 | 0 | 0 | 0 | 0 | 0 | 0 | 0 | 0 | 0 | 0 | 0 | 0 |    |   |
| M02255_76_000000000-ADUNE_1_1113_19559_21734 C---GG---CT-AA-CTC-----CGT-G-C-----C-A-G---C--AG-C-CGC-GG-----TA-A-T-A--CG-GA-----GG-A----TC-CA-AG-CG-----T-TA-T-C-CGG-----G--C-TT-A-T-T-----<br>----AA---G-T-C-A-----G-G-G--G-TG--A-AA-GA--C-G-GT-A-G-----CT-T-AA-----C-T-A-T-C-G-C-A-G---T-G--C-C---T-T-----T--GA-T-A--C-----T--G-A--TG--A-G-C---T-T-G-A-A-T--A--C-AG-----TT-G-A-----A-G-T-G--GG-C-----GG--A--ATG---T-<br>G-A-C-AA--GT-A-G-CG-GT--G---A--A-A---TG-C-AT-AG--AT-A-TG--T-C--A-C-A-G-A-AC-A-CC---GA--T-T--GC-GAA-G--G-C-A-----G--C-T-C-A--CTA--A--AG-T-G-----T-G--A-T-T--GA--CA-C-T-G--A-GG--C-A-CG-A--AA-G-C---G-TG--GG-G-<br>-AT-C-A-AA-----CA--GG Bacteria(100);Bacteroidetes(100);Sphingobacteria(100);Sphingobacteriales(100);Sphingobacteriaceae(100);unclassified(100);unclassified(100);unclassified(100);unclassified(100);            |   |   |   |   |   |   |   |   |   |   |   |   |   |   |   |   |   |   |   |   |   |   |   |   |   |    |   |
| Otu1198                                                                                                                                                                                                                                                                                                                                                                                                                                                                                                                                                                                                                                                                                                                                                                                                                                                    | 0 | 0 | 0 | 0 | 0 | 0 | 0 | 0 | 0 | 0 | 0 | 0 | 0 | 0 | 0 | 0 | 0 | 0 | 0 | 0 | 0 | 0 | 0 | 0 | 0 | 0  |   |
|                                                                                                                                                                                                                                                                                                                                                                                                                                                                                                                                                                                                                                                                                                                                                                                                                                                            | 0 | 0 | 0 | 0 | 0 | 0 | 0 | 0 | 0 | 0 | 0 | 0 | 0 | 0 | 0 | 0 | 0 | 0 | 0 | 0 | 0 | 0 | 0 | 0 | 0 | 0  |   |
|                                                                                                                                                                                                                                                                                                                                                                                                                                                                                                                                                                                                                                                                                                                                                                                                                                                            | 0 | 0 | 0 | 0 | 0 | 0 | 0 | 0 | 0 | 0 | 0 | 0 | 0 | 0 | 0 | 0 | 0 | 0 | 0 | 0 | 0 | 0 | 0 | 0 | 0 | 0  |   |
| 13                                                                                                                                                                                                                                                                                                                                                                                                                                                                                                                                                                                                                                                                                                                                                                                                                                                         | 0 | 0 | 0 | 0 | 0 | 0 | 0 | 0 | 0 | 0 | 0 | 0 | 0 | 0 | 0 | 0 | 0 | 0 | 0 | 0 | 0 | 0 | 0 | 0 | 0 |    |   |
| M02255_76_000000000-ADUNE_1_1116_3461_15781 C---GG---CT-AA-ATA-----CGT-G-C-----C-A-G---C--AG-C-C-G-CG-----GT-A--A-T--AC-GT-----AT--G----TC-CC-AA-GC-----GTTA-T-C-C-G-----G--T-TA-T-T-T-----AA---<br>-G-T-C-T-----G-A-T--G--TG--A-AA-GC--C-T-AC-G-G-----CT-C-AA-----C-C-G-T-A-G-A--A-T---T-G--C-A---T-C-----G--GA-A-A--C-----T--G-G--AT--G-A-C---T-T-G-A-G-T--G---C-AG-----TA-G-A-----G-G-A-G---AG-T-----GG--A--ACT---C-C-A-T-<br>GT--GT-A-G-CG-GT--G---A--A-A---TG-C-GT-AG--AT-A-TA--T-G--G-A-A-G-A-AC-A-CC---AG--A--G--GC-GAA-G--G-C--G-----G--C-T-C-T---CTG--G--AC-T-G-----T-A--A-C-T--GA--CG-C-T-G--A-GG--C-T-CG-A--AA-G-T---G-TG--GG-T--AG-C-<br>A-AA-----CA--GG Bacteria(100);Firmicutes(100);Bacilli(100);unclassified(100);unclassified(100);unclassified(100);unclassified(100);unclassified(100);unclassified(100);                               |   |   |   |   |   |   |   |   |   |   |   |   |   |   |   |   |   |   |   |   |   |   |   |   |   |    |   |
| Otu1199                                                                                                                                                                                                                                                                                                                                                                                                                                                                                                                                                                                                                                                                                                                                                                                                                                                    | 0 | 0 | 0 | 0 | 0 | 0 | 0 | 0 | 0 | 0 | 0 | 0 | 0 | 0 | 0 | 0 | 0 | 0 | 0 | 0 | 0 | 0 | 0 | 0 | 0 | 0  |   |
|                                                                                                                                                                                                                                                                                                                                                                                                                                                                                                                                                                                                                                                                                                                                                                                                                                                            | 0 | 0 | 0 | 0 | 0 | 0 | 0 | 0 | 0 | 0 | 0 | 0 | 0 | 0 | 0 | 0 | 0 | 0 | 0 | 0 | 0 | 0 | 0 | 0 | 0 | 0  |   |
|                                                                                                                                                                                                                                                                                                                                                                                                                                                                                                                                                                                                                                                                                                                                                                                                                                                            | 0 | 0 | 0 | 0 | 0 | 0 | 0 | 0 | 0 | 0 | 0 | 0 | 0 | 0 | 0 | 0 | 0 | 0 | 0 | 0 | 0 | 0 | 0 | 0 | 0 | 0  |   |
| 29                                                                                                                                                                                                                                                                                                                                                                                                                                                                                                                                                                                                                                                                                                                                                                                                                                                         | 0 | 0 | 0 | 0 | 0 | 0 | 0 | 0 | 0 | 0 | 0 | 0 | 0 | 0 | 0 | 0 | 0 | 0 | 0 | 0 | 0 | 0 | 0 | 0 | 0 |    |   |
| M02255_77_000000000-ADUT3_1_1105_8243_10993 T---AC---GG-AG-GGG-----GCT-A-G-----C--G--T---T--GT-T-CGG-AA-----TT-A--C-T--GG-GC-----GT--A----AA-GC-GC-GC-----G-TA-G-G-C-G-----G--C-TT-G-G-T-----<br>AA---G-T-T-A-----G-A-G--G--TG--A-AA-GC--C-C-GG-G-G-----CT-C-AA-----C-C-C-C-G-G-A--A-T---A-G--C-C---T-T-----T--AA-G-A--C-----T--G-C-TT--C-G-C---T-T-G-A-A-C--G---T-CG-----GA-G-A-----G-G-T-G---AG-T-----GG--A--ATT---C-C-G-<br>A-GT--GT-A-G-AG-GT--G---A--A-A---TT-C-GT-AG--AT-A-TT--C-G--G-A-A-G-A-AC-A-CC---AG--T--G--GC-GAA-G--G-C--G-----G--C-T-C-A--CTG--G--AC-G-A-----C-T---G-T-T--GA--CG-C-T-G--A-GG--T-G-CG-A--AA-G-C---G-TG--GG-G--<br>AG-C-A-AA-----CA--GG Bacteria(100);Proteobacteria(100);Alphaproteobacteria(100);Sphingomonadales(100);Sphingomonadaceae(100);Sphingomonas(100);Sphingomonadaceae(100);Sphingomonas(100);unclassified(100); |   |   |   |   |   |   |   |   |   |   |   |   |   |   |   |   |   |   |   |   |   |   |   |   |   |    |   |



|                                                                                                                                                                                                                           |    |   |   |   |   |   |   |   |   |   |   |   |   |   |   |   |   |   |   |   |   |   |   |   |   |   |    |
|---------------------------------------------------------------------------------------------------------------------------------------------------------------------------------------------------------------------------|----|---|---|---|---|---|---|---|---|---|---|---|---|---|---|---|---|---|---|---|---|---|---|---|---|---|----|
| Otu1200                                                                                                                                                                                                                   | 0  | 0 | 0 | 0 | 0 | 0 | 0 | 0 | 0 | 0 | 0 | 0 | 0 | 0 | 0 | 0 | 0 | 0 | 0 | 0 | 0 | 0 | 0 | 0 | 0 | 0 | 0  |
|                                                                                                                                                                                                                           | 0  | 0 | 0 | 0 | 0 | 0 | 0 | 0 | 0 | 0 | 0 | 0 | 0 | 0 | 0 | 0 | 0 | 0 | 0 | 0 | 0 | 0 | 0 | 0 | 0 | 0 | 0  |
|                                                                                                                                                                                                                           | 0  | 0 | 0 | 0 | 0 | 0 | 0 | 0 | 0 | 0 | 0 | 0 | 0 | 0 | 0 | 0 | 0 | 0 | 0 | 0 | 0 | 0 | 0 | 0 | 0 | 0 | 0  |
|                                                                                                                                                                                                                           | 46 | 0 | 0 | 0 | 0 | 0 | 0 | 0 | 0 | 0 | 0 | 0 | 0 | 0 | 0 | 0 | 0 | 0 | 0 | 0 | 0 | 0 | 0 | 0 | 0 | 0 | 0  |
| M02255_77_000000000-ADUT3_1_1107_15285_13755 T---AC---GT-AG-GTG-----GCA-A-G-----C-G--T--T--GT-C-CGG-AT-----TT-A--C-T--GG-GC-----GT--A----AA-GG-AT-GC-----G-TA-G-G-C-G-----G--A-TA-C-T-T-----                              |    |   |   |   |   |   |   |   |   |   |   |   |   |   |   |   |   |   |   |   |   |   |   |   |   |   |    |
| ----AA---G-T-C-A-----G-A-T--G--TG--A-AA-AT--C-C-CG-A-G----CT-T-AA-----C-T-T-G-G-G-A--A-C---T-G--C-A--T-T-----T--GA-A-A--C-----T--G-G--GT--A-T-C---T-A-G-A-G-T--G--T-GG----GA-G-A-----G-G-A-A--AG-T-----GG--A--ATT---C-    |    |   |   |   |   |   |   |   |   |   |   |   |   |   |   |   |   |   |   |   |   |   |   |   |   |   |    |
| C-T-A-GT--GT-A-G-CG-GT--G---A--A-A---TG-C-GT-AG--AG-A-TT--A-G--G-A-A-G-A-AC-A-CC--AG--T--G--GC-GAA-G--G-C--G-----A--C-T-T-T---CTG--G--AC-C-A-----T-A---A-C-T--GA--CG-C-T-G--A-GG--C-A-TG-A--AA-G-C---G-TG--GG-G-          |    |   |   |   |   |   |   |   |   |   |   |   |   |   |   |   |   |   |   |   |   |   |   |   |   |   |    |
| -AG-C-A-AA-----CA--GG Bacteria(100);Firmicutes(100);Clostridia(100);Clostridiales(100);Clostridiaceae(100);Clostridium(100);unclassified(100);unclassified(100);unclassified(100);                                        |    |   |   |   |   |   |   |   |   |   |   |   |   |   |   |   |   |   |   |   |   |   |   |   |   |   |    |
| Otu1201                                                                                                                                                                                                                   | 0  | 0 | 0 | 0 | 0 | 0 | 0 | 0 | 0 | 0 | 0 | 0 | 0 | 0 | 0 | 0 | 0 | 0 | 0 | 0 | 0 | 0 | 0 | 0 | 0 | 0 | 0  |
|                                                                                                                                                                                                                           | 0  | 0 | 0 | 0 | 0 | 0 | 0 | 0 | 0 | 0 | 0 | 0 | 0 | 0 | 0 | 0 | 0 | 0 | 0 | 0 | 0 | 0 | 0 | 0 | 0 | 0 | 0  |
|                                                                                                                                                                                                                           | 0  | 0 | 0 | 0 | 0 | 0 | 0 | 0 | 0 | 0 | 0 | 0 | 0 | 0 | 0 | 0 | 0 | 0 | 0 | 0 | 0 | 0 | 0 | 0 | 0 | 0 | 0  |
|                                                                                                                                                                                                                           | 22 | 0 | 0 | 0 | 0 | 0 | 0 | 0 | 0 | 0 | 0 | 0 | 0 | 0 | 0 | 0 | 0 | 0 | 0 | 0 | 0 | 0 | 0 | 0 | 0 | 0 | 0  |
| M02255_77_000000000-ADUT3_1_1107_12664_15591 G---AC---GG-AG-GAG-----GCA-A-G-----C-G--T--T--AT-C-CGG-AA-----TT-A--T-T--GG-GC-----GT--A----AA-GC-GT-CC-----G-CA-G-G-C-G-----G--C-TT-T-T-T-----                              |    |   |   |   |   |   |   |   |   |   |   |   |   |   |   |   |   |   |   |   |   |   |   |   |   |   |    |
| -----AA---G-T-C-T-----G-T-T--G--TT--A-AA-GC--C-C-AC-A-G----CT-C-AA-----C-T-G-T-G-G-A--T-C---G-G--C-A--A-T-----G--GA-A-A--C-----T--G-G--GA--G-G-C---T-A-G-A-G-T--G--T-GG----TA-G-G-----G-G-T-A--GA-G-----GG--A--ATT---     |    |   |   |   |   |   |   |   |   |   |   |   |   |   |   |   |   |   |   |   |   |   |   |   |   |   |    |
| C-C-C-G-GT--GT-A-G-CG-GT--G---A--A-A---TG-C-GT-AG--AT-A-TC--G-G--G-A-A-G-A-AC-A-CC--AG--T--G--GC-GAA-G--G-C--G-----C--T-C-T-A---CTG--G--GC-C-A-----C-A---A-C-T--GA--CG-C-T-G--A-GG--G-A-CG-A--AA-G-C---T-AG--             |    |   |   |   |   |   |   |   |   |   |   |   |   |   |   |   |   |   |   |   |   |   |   |   |   |   |    |
| GG-G--AG-C-G-AA-----AG--GG Bacteria(100);Cyanobacteria(100);SubsectionIII(100);unclassified(100);unclassified(100);unclassified(100);unclassified(100);unclassified(100);unclassified(100);                               |    |   |   |   |   |   |   |   |   |   |   |   |   |   |   |   |   |   |   |   |   |   |   |   |   |   |    |
| Otu1202                                                                                                                                                                                                                   | 0  | 0 | 0 | 0 | 0 | 0 | 0 | 0 | 0 | 0 | 0 | 0 | 0 | 0 | 0 | 0 | 0 | 0 | 0 | 0 | 0 | 0 | 0 | 0 | 0 | 0 | 0  |
|                                                                                                                                                                                                                           | 0  | 0 | 0 | 0 | 0 | 0 | 0 | 0 | 0 | 0 | 0 | 0 | 0 | 0 | 0 | 0 | 0 | 0 | 0 | 0 | 0 | 0 | 0 | 0 | 0 | 0 | 0  |
|                                                                                                                                                                                                                           | 0  | 0 | 0 | 0 | 0 | 0 | 0 | 0 | 0 | 0 | 0 | 0 | 0 | 0 | 0 | 0 | 0 | 0 | 0 | 0 | 0 | 0 | 0 | 0 | 0 | 0 | 0  |
|                                                                                                                                                                                                                           | 28 | 0 | 0 | 0 | 0 | 0 | 0 | 0 | 0 | 0 | 0 | 0 | 0 | 0 | 0 | 0 | 0 | 0 | 0 | 0 | 0 | 0 | 0 | 0 | 0 | 0 | 0  |
| M02255_77_000000000-ADUT3_1_1111_14194_13027 T---AC---GT-AG-GCA-----GCG-A-G-----C-G--T--T--GT-T-CGG-AG-----TT-A--C-T--GG-GC-----GT--A----AA-GC-GT-GC-----G-TA-G-G-C-G-----G--T-GG-T-C-C-----                              |    |   |   |   |   |   |   |   |   |   |   |   |   |   |   |   |   |   |   |   |   |   |   |   |   |   |    |
| -----AA---G-T-C-T-----G-G-T--G--TG--A-AA-TC--T-C-CC-G-G----CT-C-AA-----C-T-G-G-G-A-G--G-G---T-G--C-G---C-C-----G--GA-A-A--C-----T--G-G--GC--C-G-C---T-G-G-A-G-T--A---C-GG----GA-G-A-----G-G-C-A--AG-C-----GG--A--ATT---   |    |   |   |   |   |   |   |   |   |   |   |   |   |   |   |   |   |   |   |   |   |   |   |   |   |   |    |
| C-C-A-G-GT--GT-A-G-CG-GT--G---A--A-A---TG-C-GT-AG--AT-A-TC--T-G--G-A-G-G-A-AC-A-CC--CG--T--G--GT-GCA-G--A-C--G-----G--C-T-T-G---CTG--G--AC-A-G-----T-G---A-C-T--GA--CG-C-T-G--A-GG--C-A-CG-A--AA-G-C---G-TG--             |    |   |   |   |   |   |   |   |   |   |   |   |   |   |   |   |   |   |   |   |   |   |   |   |   |   |    |
| GG-T--AG-C-A-AA-----CA--GG Bacteria(100);unclassified(100);unclassified(100);unclassified(100);unclassified(100);unclassified(100);unclassified(100);unclassified(100);unclassified(100);                                 |    |   |   |   |   |   |   |   |   |   |   |   |   |   |   |   |   |   |   |   |   |   |   |   |   |   |    |
| Otu1203                                                                                                                                                                                                                   | 0  | 0 | 0 | 0 | 0 | 0 | 0 | 0 | 0 | 0 | 0 | 0 | 0 | 0 | 0 | 0 | 0 | 0 | 0 | 0 | 0 | 0 | 0 | 0 | 0 | 0 | 0  |
|                                                                                                                                                                                                                           | 0  | 0 | 0 | 0 | 0 | 0 | 0 | 0 | 0 | 0 | 0 | 0 | 0 | 0 | 0 | 0 | 0 | 0 | 0 | 0 | 0 | 0 | 0 | 0 | 0 | 0 | 0  |
|                                                                                                                                                                                                                           | 0  | 0 | 0 | 0 | 0 | 0 | 0 | 0 | 0 | 0 | 0 | 0 | 0 | 0 | 0 | 0 | 0 | 0 | 0 | 0 | 0 | 0 | 0 | 0 | 0 | 0 | 12 |
|                                                                                                                                                                                                                           | 0  | 0 | 0 | 0 | 0 | 0 | 0 | 0 | 0 | 0 | 0 | 0 | 0 | 0 | 0 | 0 | 0 | 0 | 0 | 0 | 0 | 0 | 0 | 0 | 0 | 0 | 0  |
| M02255_77_000000000-ADUT3_1_2114_24120_16997 T---AC---GT-AG-GGT-----CCG-A-G-----C-G--T--T--GT-C-CGG-AA-----TT-A--T-T--GG-GC-----GT--A----AA-GA-GC-TC-----G-TA-G-G-C-G-----G--T-TC-G-T-C-----                              |    |   |   |   |   |   |   |   |   |   |   |   |   |   |   |   |   |   |   |   |   |   |   |   |   |   |    |
| ----GC---G-T-C-T-----G-C-C--G--TG--A-AA-TC--C-T-CA-G-G----CT-C-AA-----C-C-T-G-G-G-G--C-G---T-G--C-G---G--T-----G--GG-T-A--C-----G--G-G--CG--G-A-C---T-A-G-A-G-T--G---C-GG----TA-G-G-----G-G-A-G---AA-T-----GG--A--ACT---  |    |   |   |   |   |   |   |   |   |   |   |   |   |   |   |   |   |   |   |   |   |   |   |   |   |   |    |
| C-C-T-G-GT--GT-A-G-CG-GT--G---G--A-A---TG-C-GC-AG--AT-A-TC--A-G--G-A-A-G-A-AC-A-CC--GA--T--G--GC-GAA-G--G-C--A-----G--T-T-C-T---CTG--G--GC-C-G-----T-A---A-C-T--GA--CG-C-T-G--A-GG--A-G-CG-A--AA-G-C---G-TG--             |    |   |   |   |   |   |   |   |   |   |   |   |   |   |   |   |   |   |   |   |   |   |   |   |   |   |    |
| GG-G--AG-C-G-AA-----CA--GG Bacteria(100);Actinobacteria(100);Actinobacteria(100);Actinobacteridae(100);Actinomycetales(100);unclassified(100);unclassified(100);unclassified(100);unclassified(100);                      |    |   |   |   |   |   |   |   |   |   |   |   |   |   |   |   |   |   |   |   |   |   |   |   |   |   |    |
| Otu1204                                                                                                                                                                                                                   | 0  | 0 | 0 | 0 | 0 | 0 | 0 | 0 | 0 | 0 | 0 | 0 | 0 | 0 | 0 | 0 | 0 | 0 | 0 | 0 | 0 | 0 | 0 | 0 | 0 | 0 | 0  |
|                                                                                                                                                                                                                           | 0  | 0 | 0 | 0 | 0 | 0 | 0 | 0 | 0 | 0 | 0 | 0 | 0 | 0 | 0 | 0 | 0 | 0 | 0 | 0 | 0 | 0 | 0 | 0 | 0 | 0 | 0  |
|                                                                                                                                                                                                                           | 0  | 0 | 0 | 0 | 0 | 0 | 0 | 0 | 0 | 0 | 0 | 0 | 0 | 0 | 0 | 0 | 0 | 0 | 0 | 0 | 0 | 0 | 0 | 0 | 0 | 0 | 0  |
|                                                                                                                                                                                                                           | 23 | 0 | 0 | 0 | 0 | 0 | 0 | 0 | 0 | 0 | 0 | 0 | 0 | 0 | 0 | 0 | 0 | 0 | 0 | 0 | 0 | 0 | 0 | 0 | 0 | 0 | 0  |
| M02255_77_000000000-ADUT3_1_1119_13604_5411 T----AC---GT-AG-GGG-----GCA-A-G-----C--G--T--T--AT-C-CGG-AT-----TT-A--C-T--GG-GT-----GT--A----AA-GG-GA-GC-----G-TA-G-A-C-G-----G--T-TT-A-G-C-----AA-                          |    |   |   |   |   |   |   |   |   |   |   |   |   |   |   |   |   |   |   |   |   |   |   |   |   |   |    |
| --G-T-C-T-----G-A-A--G--TG--A-AA-TC--C-C-GG-G-G----CT-T-AA-----C-C-C-C-G-G-A--G-C---T-G--C-T---T-T-----G--GA-A-A--C-----T--G-T--TA--G-A-C---T-T-G-A-G-T--G---T-CG----GA-G-A-----G-G-T-A--AG-T-----AG--A--ATT-----C-C-T-A- |    |   |   |   |   |   |   |   |   |   |   |   |   |   |   |   |   |   |   |   |   |   |   |   |   |   |    |
| GT--GT-A-G-CG-GT--G---A--A-A---TG-C-GT-AG--AT-A-TT--A-G--G-A-G-G-A-AT-A-CC--AG--T--G--GC-GAA-G--G-C--G-----A--C-T-T-A---CTG--G--AC-G-A-----T-A---A-C-T--GA--CG-T-T-G--A-GG--C-T-CG-A--AA-G-C---G-TG--GG-G--AG-            |    |   |   |   |   |   |   |   |   |   |   |   |   |   |   |   |   |   |   |   |   |   |   |   |   |   |    |
| C-A-AA-----CA--GG Bacteria(100);Firmicutes(100);Clostridia(100);Clostridiales(100);Lachnospiraceae(100);unclassified(100);unclassified(100);unclassified(100);unclassified(100);                                          |    |   |   |   |   |   |   |   |   |   |   |   |   |   |   |   |   |   |   |   |   |   |   |   |   |   |    |



|         |                                                                                                                                                                                                                                                                                                                                                                                                                                                                                                                                                                                                                                                                                                                                                                                                            |   |   |   |   |   |   |   |   |   |   |   |   |   |   |   |   |   |   |   |   |   |   |   |   |   |  |  |
|---------|------------------------------------------------------------------------------------------------------------------------------------------------------------------------------------------------------------------------------------------------------------------------------------------------------------------------------------------------------------------------------------------------------------------------------------------------------------------------------------------------------------------------------------------------------------------------------------------------------------------------------------------------------------------------------------------------------------------------------------------------------------------------------------------------------------|---|---|---|---|---|---|---|---|---|---|---|---|---|---|---|---|---|---|---|---|---|---|---|---|---|--|--|
| Otu1205 | 0                                                                                                                                                                                                                                                                                                                                                                                                                                                                                                                                                                                                                                                                                                                                                                                                          | 0 | 0 | 0 | 0 | 0 | 0 | 0 | 0 | 0 | 0 | 0 | 0 | 0 | 0 | 0 | 0 | 0 | 0 | 0 | 0 | 0 | 0 | 0 | 0 | 0 |  |  |
|         | 0                                                                                                                                                                                                                                                                                                                                                                                                                                                                                                                                                                                                                                                                                                                                                                                                          | 0 | 0 | 0 | 0 | 0 | 0 | 0 | 0 | 0 | 0 | 0 | 0 | 0 | 0 | 0 | 0 | 0 | 0 | 0 | 0 | 0 | 0 | 0 | 0 | 0 |  |  |
|         | 0                                                                                                                                                                                                                                                                                                                                                                                                                                                                                                                                                                                                                                                                                                                                                                                                          | 0 | 0 | 0 | 0 | 0 | 0 | 0 | 0 | 0 | 0 | 0 | 0 | 0 | 0 | 0 | 0 | 0 | 0 | 0 | 0 | 0 | 0 | 0 | 0 | 0 |  |  |
|         | 9                                                                                                                                                                                                                                                                                                                                                                                                                                                                                                                                                                                                                                                                                                                                                                                                          | 0 | 0 | 0 | 0 | 0 | 0 | 0 | 0 | 0 | 0 | 0 | 0 | 0 | 0 | 0 | 0 | 0 | 0 | 0 | 0 | 0 | 0 | 0 | 0 | 0 |  |  |
|         | M02255_76_000000000-ADUNE_1_2112_15726_18412 C---GG--CT-AA-TTT-----CGT-G-C----C-A-A-G--C--AG-C-CGC-GG-----TA-A--T-A-CG-AA-----AG-G---TC-CA-AG-CG-----T-TA-C-T-C-G-----G-A-TT-T-G-T-----AT---G-T-C-G-----A-T-T--G--TG--A-AA-GC--C-C-CG-G-G----CT-C-AA-----C-C-T-G-G-G-A-A-C---T-G--C-A--G-T-----C--GA-A-A--C-----T-G-C--AA--A-G-C---T-T-G-A-A-T-G--T-TG---GA-G-A-----G-G-T-T--GG-G-----GG-A-ATA---C-C-T-A-GT--GG-A-G-AA-GT--G---A-A-A---TT-C-GT-AG--AG-A-TT--A-G--G-T-G-G-A-AC-A-CC--AG-A-A-G-GC-GAA-G--G-C-G-----C-C-T-G-A--CTG-G--CC-A-A-----A-C--A-T-T-GA--CG-C-T-G--A-GG--C-G-CG-A-AA-G-C---G-TG--GG-T--AG-C-A-AA-----CA--GG Bacteria(100);unclassified(100);unclassified(100);unclassified(100);unclassified(100);unclassified(100);unclassified(100);unclassified(100);unclassified(100);             |   |   |   |   |   |   |   |   |   |   |   |   |   |   |   |   |   |   |   |   |   |   |   |   |   |  |  |
| Otu1206 | 0                                                                                                                                                                                                                                                                                                                                                                                                                                                                                                                                                                                                                                                                                                                                                                                                          | 0 | 0 | 0 | 0 | 0 | 0 | 0 | 0 | 0 | 0 | 0 | 0 | 0 | 0 | 0 | 0 | 0 | 0 | 0 | 0 | 0 | 0 | 0 | 0 | 0 |  |  |
|         | 0                                                                                                                                                                                                                                                                                                                                                                                                                                                                                                                                                                                                                                                                                                                                                                                                          | 0 | 0 | 0 | 0 | 0 | 0 | 0 | 0 | 0 | 0 | 0 | 0 | 0 | 0 | 0 | 0 | 0 | 0 | 0 | 0 | 0 | 0 | 0 | 0 | 0 |  |  |
|         | 0                                                                                                                                                                                                                                                                                                                                                                                                                                                                                                                                                                                                                                                                                                                                                                                                          | 0 | 0 | 0 | 0 | 0 | 0 | 0 | 0 | 0 | 0 | 0 | 0 | 0 | 0 | 0 | 0 | 0 | 0 | 0 | 0 | 0 | 0 | 0 | 0 | 0 |  |  |
|         | 11                                                                                                                                                                                                                                                                                                                                                                                                                                                                                                                                                                                                                                                                                                                                                                                                         | 0 | 0 | 0 | 0 | 0 | 0 | 0 | 0 | 0 | 0 | 0 | 0 | 0 | 0 | 0 | 0 | 0 | 0 | 0 | 0 | 0 | 0 | 0 | 0 | 0 |  |  |
|         | M02255_77_000000000-ADUT3_1_1110_14598_19444 A---AC--GT-AG-GAG-----GCG-A-G-----C-G-T--T--AT-C-CGG-AT-----TT-A--C-T-GG-GT-----GT--A---AA-GC-GC-GT-----G-CA-G-G-C-G-----G-T-TT-A-T-T-----AA---G-T-T-G-----G-G-T--G--TG--A-AA-GC--T-C-CT-G-G----CT-C-AA-----C-T-A-G-G-A-G--A-G--G-T--C-G--C-T-----C-AA-G-A--C-----T-G-A-TA-G-A-C---T-C-G-A-G-A--G--C-AG---TA-G-G-----G-G-A-A--GG-T-----GG--A--ATT---C-C-G-G-GA--GT-A-G-TG-GT--G---A-A-A---TG-C-GT-AG--AT-A-TC--C-G--G-A-G-G-A-AC-A-CC--AG--T--G--GC-GAA-G--G-C-G-----G--C-C-T-T--CTA-G--AC-T-G-----T-A--T-C-T-GA--CG-C-T-C--A-GA--C-G-CG-A-AA-G-C---T-AG--GG-T--AG-C-A-AA-----CG--GG Bacteria(100);Chloroflexi(100);Anaerolineae(100);Anaerolineales(100);Anaerolineaceae(100);unclassified(100);unclassified(100);unclassified(100);unclassified(100);       |   |   |   |   |   |   |   |   |   |   |   |   |   |   |   |   |   |   |   |   |   |   |   |   |   |  |  |
| Otu1207 | 0                                                                                                                                                                                                                                                                                                                                                                                                                                                                                                                                                                                                                                                                                                                                                                                                          | 0 | 0 | 0 | 0 | 0 | 0 | 0 | 0 | 0 | 0 | 0 | 0 | 0 | 0 | 0 | 0 | 0 | 0 | 0 | 0 | 0 | 0 | 0 | 0 | 0 |  |  |
|         | 0                                                                                                                                                                                                                                                                                                                                                                                                                                                                                                                                                                                                                                                                                                                                                                                                          | 0 | 0 | 0 | 0 | 0 | 0 | 0 | 0 | 0 | 0 | 0 | 0 | 0 | 0 | 0 | 0 | 0 | 0 | 0 | 0 | 0 | 0 | 0 | 0 | 0 |  |  |
|         | 0                                                                                                                                                                                                                                                                                                                                                                                                                                                                                                                                                                                                                                                                                                                                                                                                          | 0 | 0 | 0 | 0 | 0 | 0 | 0 | 0 | 0 | 0 | 0 | 0 | 0 | 0 | 0 | 0 | 0 | 0 | 0 | 0 | 0 | 0 | 0 | 0 | 0 |  |  |
|         | 13                                                                                                                                                                                                                                                                                                                                                                                                                                                                                                                                                                                                                                                                                                                                                                                                         | 0 | 0 | 0 | 0 | 0 | 0 | 0 | 0 | 0 | 0 | 0 | 0 | 0 | 0 | 0 | 0 | 0 | 0 | 0 | 0 | 0 | 0 | 0 | 0 | 0 |  |  |
|         | M02255_77_000000000-ADUT3_1_2108_16615_18854 T---AC--GG-AG-GGG-----GCT-A-G-----C-G-T--T--GT-T-CGG-AA-----TT-A--C-T-GG-GC-----GT--A---AA-GC-GC-GC-----G-TA-G-G-C-G-----G-A-CC-G-T-T-----AA---G-T-C-G-----G-G-G--G--TG--A-AA-TC--C-C-GG-G-G----CT-C-AA-----C-C-C-C-G-G-A-A-C---G-G--C-C--T-T-----C--GA-T-A--C-----T-G-G--CG--G-T-C---T-G-G-A-G-G--T--C-GA---GA-G-A-----G-G-T-G--GG-T-----GG--A--ATT---C-C-G-A-GT--GT-A-G-AG-GT--G---A-A-A---TT-C-GT-AG--AT-A-TT--C-G--G-A-G-G-A-AC-A-CC--GG--T--G--GC-GAA-G--G-C-G-----G--C-C-A--CTG-G--CT-C-G-----A-T--T-C-T-GA--CG-C-T-G--A-GG--C-G-CG-A-AA-G-C---G-TG--GG-G--AG-C-A-AA-----CA--GG Bacteria(100);Proteobacteria(100);Alphaproteobacteria(100);unclassified(100);unclassified(100);unclassified(100);unclassified(100);unclassified(100);unclassified(100); |   |   |   |   |   |   |   |   |   |   |   |   |   |   |   |   |   |   |   |   |   |   |   |   |   |  |  |
| Otu1208 | 0                                                                                                                                                                                                                                                                                                                                                                                                                                                                                                                                                                                                                                                                                                                                                                                                          | 0 | 0 | 0 | 0 | 0 | 0 | 0 | 0 | 0 | 0 | 0 | 0 | 0 | 0 | 0 | 0 | 0 | 0 | 0 | 0 | 0 | 0 | 0 | 0 | 0 |  |  |
|         | 0                                                                                                                                                                                                                                                                                                                                                                                                                                                                                                                                                                                                                                                                                                                                                                                                          | 0 | 0 | 0 | 0 | 0 | 0 | 0 | 0 | 0 | 0 | 0 | 0 | 0 | 0 | 0 | 0 | 0 | 0 | 0 | 0 | 0 | 0 | 0 | 0 | 0 |  |  |
|         | 0                                                                                                                                                                                                                                                                                                                                                                                                                                                                                                                                                                                                                                                                                                                                                                                                          | 0 | 0 | 0 | 0 | 0 | 0 | 0 | 0 | 0 | 0 | 0 | 0 | 0 | 0 | 0 | 0 | 0 | 0 | 0 | 0 | 0 | 0 | 0 | 0 | 0 |  |  |
|         | 11                                                                                                                                                                                                                                                                                                                                                                                                                                                                                                                                                                                                                                                                                                                                                                                                         | 0 | 0 | 0 | 0 | 0 | 0 | 0 | 0 | 0 | 0 | 0 | 0 | 0 | 0 | 0 | 0 | 0 | 0 | 0 | 0 | 0 | 0 | 0 | 0 | 0 |  |  |
|         | M02255_77_000000000-ADUT3_1_1109_8570_17849 T---AC--GT-AG-GGC-----GCA-A-G-----C-G-T--T--GT-T-CGG-AA-----TT-A--T-T-GG-GC-----GT--A---AA-GA-GC-TC-----G-TA-G-G-C-G-----G--C-TT-G-T-C-----GC---G-T-C-T-----G-C-C--G--TG--A-AA-GT--C-C-GG-G-G----CT-T-AA-----C-T-C-C-G-G-A--T-C---T-G--C-G--G--T-----G--GG-T-A--C-----G--G-G--CA-G-G-C---T-A-G-A-G-T-G--C-GG---TA-G-G-----G-G-T-G--AC-T-----GG--A--ATT---C                                                                                                                                                                                                                                                                                                                                                                                                     |   |   |   |   |   |   |   |   |   |   |   |   |   |   |   |   |   |   |   |   |   |   |   |   |   |  |  |



|                                                                                                                                                                                                                           |    |    |   |   |   |   |   |   |   |   |   |   |   |   |   |   |   |   |   |   |   |   |   |   |   |    |  |
|---------------------------------------------------------------------------------------------------------------------------------------------------------------------------------------------------------------------------|----|----|---|---|---|---|---|---|---|---|---|---|---|---|---|---|---|---|---|---|---|---|---|---|---|----|--|
| Otu1210                                                                                                                                                                                                                   | 0  | 0  | 0 | 0 | 0 | 0 | 0 | 0 | 0 | 0 | 0 | 0 | 0 | 0 | 0 | 0 | 0 | 0 | 0 | 0 | 0 | 0 | 0 | 0 | 0 | 0  |  |
|                                                                                                                                                                                                                           | 0  | 0  | 0 | 0 | 0 | 0 | 0 | 0 | 0 | 0 | 0 | 0 | 0 | 0 | 0 | 0 | 0 | 0 | 0 | 0 | 0 | 0 | 0 | 0 | 0 | 0  |  |
|                                                                                                                                                                                                                           | 0  | 0  | 0 | 0 | 0 | 0 | 0 | 0 | 0 | 0 | 0 | 0 | 0 | 0 | 0 | 0 | 0 | 0 | 0 | 0 | 0 | 0 | 0 | 0 | 0 | 0  |  |
|                                                                                                                                                                                                                           | 11 | 0  | 0 | 0 | 0 | 0 | 0 | 0 | 0 | 0 | 0 | 0 | 0 | 0 | 0 | 0 | 0 | 0 | 0 | 0 | 0 | 0 | 0 | 0 | 0 | 0  |  |
| M02255_77_000000000-ADUT3_1_2106_16800_19909 C---GG--CT-AA-AT-----ACGTG-C----C-A-G--C--AG-C-C-G-CG-----GT-A--A-T-AC-GT-----AT--G-----TC-CC-GAGCG-----T-TA-T-A-C-G-----G--T-TA-A-T-T-----                                  |    |    |   |   |   |   |   |   |   |   |   |   |   |   |   |   |   |   |   |   |   |   |   |   |   |    |  |
| ---AA---G-T-C-T-----G-A-T--G--TG--A-AA-GC--C-C-GG-A-G----CT-C-AA-----C-T-C-C-G-G-A-A-A---G-G--C-A--T-T-----G--GA-A-A--C-----T-G-G--TT--A-A-C---T-T-G-A-G-T-G---C-AG---TA-G-A-----G-G-T-A--AG-T-----GG-A--ACT---C-         |    |    |   |   |   |   |   |   |   |   |   |   |   |   |   |   |   |   |   |   |   |   |   |   |   |    |  |
| C-A-T-GT--GT-A-G-CG-GT--G---G--A-A---TG-C-GT-AG--AT-A-TA--T-G--G-A-A-G-A-AC-A-CC--AG--C-G-G-GC-GAA-G--G-C-G-----G--C-T-T-A--CTG--G--AC-T-G-----T-A--A-C-T-GA--CG-T-T-G--A-GG--C-T-CG-A--AA-G-T---G-TG--GG-T-              |    |    |   |   |   |   |   |   |   |   |   |   |   |   |   |   |   |   |   |   |   |   |   |   |   |    |  |
| -AG-C-A-AA-----CA--GG Bacteria(100);Firmicutes(100);Bacilli(100);Lactobacillales(100);Leuconostocaceae(100);Leuconostoc(100);unclassified(100);unclassified(100);unclassified(100);                                       |    |    |   |   |   |   |   |   |   |   |   |   |   |   |   |   |   |   |   |   |   |   |   |   |   |    |  |
| Otu1211                                                                                                                                                                                                                   | 0  | 0  | 0 | 0 | 0 | 0 | 0 | 0 | 0 | 0 | 0 | 0 | 0 | 0 | 0 | 0 | 0 | 0 | 0 | 0 | 0 | 0 | 0 | 0 | 0 | 0  |  |
|                                                                                                                                                                                                                           | 0  | 0  | 0 | 0 | 0 | 0 | 0 | 0 | 0 | 0 | 0 | 0 | 0 | 0 | 0 | 0 | 0 | 0 | 0 | 0 | 0 | 0 | 0 | 0 | 0 | 0  |  |
|                                                                                                                                                                                                                           | 0  | 0  | 0 | 0 | 0 | 0 | 0 | 0 | 0 | 0 | 0 | 0 | 0 | 0 | 0 | 0 | 0 | 0 | 0 | 0 | 0 | 0 | 0 | 0 | 0 | 0  |  |
|                                                                                                                                                                                                                           | 0  | 0  | 0 | 0 | 0 | 7 | 0 | 0 | 0 | 0 | 0 | 0 | 0 | 0 | 0 | 0 | 0 | 0 | 0 | 0 | 0 | 0 | 0 | 0 | 0 | 0  |  |
| M02255_77_000000000-ADUT3_1_1117_7739_4845 T---AC--AG-AC-GGT-----GCG-G-G-----C-G-T---T--AT-T-CAG-CT-----TA-A--A-T-GG-GT-----GT--A---AA-GG-GT-AT-----G-TA-G-G-T-G-----G--C-CA-G-T-C-----CT--                               |    |    |   |   |   |   |   |   |   |   |   |   |   |   |   |   |   |   |   |   |   |   |   |   |   |    |  |
| --G-A-T-A-----A-G-T--A--GA--A-AT-TC--T-G-GG-G-T---CA-T-AA-----C-A-G-T-A-GCA--G-A---T-A--C-T--T-T-----G--TA-A-A--C-----A--GTT--CA--A-G-C---TCC-G-A-G-T-A--T-AG---AC-G-G-----G-G-T-A--TG-G-----GT--A--ATT---T-C-T-T-        |    |    |   |   |   |   |   |   |   |   |   |   |   |   |   |   |   |   |   |   |   |   |   |   |   |    |  |
| CA--GT-T-A-GTGTT--T---A--T-A---GA-C-CG-AG--AT-A-GA--A-G--A-A-G-G-A-GC-A-TC--AT--T-G--GT-GAA-G--A-C-G-----T--C-A-T-T---CTA-G---T-T-T-----A-T--A-C-T-GA--CA-C-T-G--A-GG--T-A-CG-G--AG-G-T---T-AG--GG-G--AG-C-               |    |    |   |   |   |   |   |   |   |   |   |   |   |   |   |   |   |   |   |   |   |   |   |   |   |    |  |
| A-AA-----TC--GG Bacteria(100);unclassified(100);unclassified(100);unclassified(100);unclassified(100);unclassified(100);unclassified(100);unclassified(100);unclassified(100);                                            |    |    |   |   |   |   |   |   |   |   |   |   |   |   |   |   |   |   |   |   |   |   |   |   |   |    |  |
| Otu1212                                                                                                                                                                                                                   | 0  | 0  | 0 | 0 | 0 | 0 | 0 | 0 | 0 | 0 | 0 | 0 | 0 | 0 | 0 | 0 | 0 | 0 | 0 | 0 | 0 | 0 | 0 | 0 | 0 | 0  |  |
|                                                                                                                                                                                                                           | 0  | 0  | 0 | 0 | 0 | 0 | 0 | 0 | 0 | 0 | 0 | 0 | 0 | 0 | 0 | 0 | 0 | 0 | 0 | 0 | 0 | 0 | 0 | 0 | 0 | 0  |  |
|                                                                                                                                                                                                                           | 0  | 0  | 0 | 0 | 0 | 0 | 0 | 0 | 0 | 0 | 0 | 0 | 0 | 0 | 0 | 0 | 0 | 0 | 0 | 0 | 0 | 0 | 0 | 0 | 0 | 11 |  |
|                                                                                                                                                                                                                           | 0  | 0  | 0 | 0 | 0 | 0 | 0 | 0 | 0 | 0 | 0 | 0 | 0 | 0 | 0 | 0 | 0 | 0 | 0 | 0 | 0 | 0 | 0 | 0 | 0 | 0  |  |
| M02255_77_000000000-ADUT3_1_1111_7555_23813 T---AC--GG-AG-AGG-----GCT-A-G-----C-G-T---T--AT-T-CGG-AA-----TT-A--T-T-GG-GC-----GT--A---AA-GG-GC-GC-----G-TA-G-G-C-T-----G--G-TT-A-A-T-----AA-                               |    |    |   |   |   |   |   |   |   |   |   |   |   |   |   |   |   |   |   |   |   |   |   |   |   |    |  |
| --G-T-T-A-----A-A-A--G--TG--A-AA-TC--C-C-GA-G-G----CT-T-AA-----C-C-T-T-G-G-G--A-A-T---T-G--C-T--T-T-----T--AA-A-A--C-----T--A-T--TA--A-T-C---T-A-G-A-G-A-T---T-GA---AA-G-A-----G-G-A-T--AG-A-----GG--A--ATT---C-C-T-G-AT- |    |    |   |   |   |   |   |   |   |   |   |   |   |   |   |   |   |   |   |   |   |   |   |   |   |    |  |
| -GT-A-G-AG-GT--A--A-A-A---TT-C-GT-AA--AT-A-TT--A-G--G-A-G-G-A-AC-A-CC--AG--T-G--GC-GAA-G--G-C-G-----T--C-T-A-T---CTG--G--TT-C-A-----A-A--T-C-T-GA--CG-C-T-G--A-AG--C-G-CG-A--AG-G-C---G-TG--GG-G--AG-C-A-                 |    |    |   |   |   |   |   |   |   |   |   |   |   |   |   |   |   |   |   |   |   |   |   |   |   |    |  |
| AA-----CA--GG Bacteria(100);Proteobacteria(100);Alphaproteobacteria(100);Rickettsiales(100);Anaplasmataceae(100);Wolbachia(100);unclassified(100);unclassified(100);unclassified(100);                                    |    |    |   |   |   |   |   |   |   |   |   |   |   |   |   |   |   |   |   |   |   |   |   |   |   |    |  |
| Otu1213                                                                                                                                                                                                                   | 0  | 0  | 0 | 0 | 0 | 0 | 0 | 0 | 0 | 0 | 0 | 0 | 0 | 0 | 0 | 0 | 0 | 0 | 0 | 0 | 0 | 0 | 0 | 0 | 0 | 0  |  |
|                                                                                                                                                                                                                           | 0  | 0  | 0 | 0 | 0 | 0 | 0 | 0 | 0 | 0 | 0 | 0 | 0 | 0 | 0 | 0 | 0 | 0 | 0 | 0 | 0 | 0 | 0 | 0 | 0 | 0  |  |
|                                                                                                                                                                                                                           | 0  | 0  | 0 | 0 | 0 | 0 | 0 | 0 | 0 | 0 | 0 | 0 | 0 | 0 | 0 | 0 | 0 | 0 | 0 | 0 | 0 | 0 | 0 | 0 | 0 | 27 |  |
|                                                                                                                                                                                                                           | 0  | 51 | 0 | 0 | 0 | 0 | 0 | 0 | 0 | 0 | 0 | 0 | 0 | 0 | 0 | 0 | 0 | 0 | 0 | 0 | 0 | 0 | 0 | 0 | 0 | 0  |  |
| M02255_77_000000000-ADUT3_1_1108_9007_20157 T---AC--GA-AG-GGG-----GCT-A-G-----C-G-T---T--GC-T-CGG-AA-----TG-A--C-T-GG-GC-----                                                                                             |    |    |   |   |   |   |   |   |   |   |   |   |   |   |   |   |   |   |   |   |   |   |   |   |   |    |  |



|         |                                                                                                                                                                                                                                                                                                                                                                                                                                                                                                                                                                                                                                                                                                                                                                                                                      |   |   |   |   |   |   |   |   |   |   |   |   |   |   |   |   |   |   |   |   |   |   |   |   |   |    |  |
|---------|----------------------------------------------------------------------------------------------------------------------------------------------------------------------------------------------------------------------------------------------------------------------------------------------------------------------------------------------------------------------------------------------------------------------------------------------------------------------------------------------------------------------------------------------------------------------------------------------------------------------------------------------------------------------------------------------------------------------------------------------------------------------------------------------------------------------|---|---|---|---|---|---|---|---|---|---|---|---|---|---|---|---|---|---|---|---|---|---|---|---|---|----|--|
| Otu1215 | 0                                                                                                                                                                                                                                                                                                                                                                                                                                                                                                                                                                                                                                                                                                                                                                                                                    | 0 | 0 | 0 | 0 | 0 | 0 | 0 | 0 | 0 | 0 | 0 | 0 | 0 | 0 | 0 | 0 | 0 | 0 | 0 | 0 | 0 | 0 | 0 | 0 | 0 | 0  |  |
|         | 0                                                                                                                                                                                                                                                                                                                                                                                                                                                                                                                                                                                                                                                                                                                                                                                                                    | 0 | 0 | 0 | 0 | 0 | 0 | 0 | 0 | 0 | 0 | 0 | 0 | 0 | 0 | 0 | 0 | 0 | 0 | 0 | 0 | 0 | 0 | 0 | 0 | 0 | 0  |  |
|         | 0                                                                                                                                                                                                                                                                                                                                                                                                                                                                                                                                                                                                                                                                                                                                                                                                                    | 0 | 0 | 0 | 0 | 0 | 0 | 0 | 0 | 0 | 0 | 0 | 0 | 0 | 0 | 0 | 0 | 0 | 0 | 0 | 0 | 0 | 0 | 0 | 0 | 0 | 60 |  |
|         | 0                                                                                                                                                                                                                                                                                                                                                                                                                                                                                                                                                                                                                                                                                                                                                                                                                    | 0 | 0 | 0 | 0 | 0 | 0 | 0 | 0 | 0 | 0 | 0 | 0 | 0 | 0 | 0 | 0 | 0 | 0 | 0 | 0 | 0 | 0 | 0 | 0 | 0 |    |  |
|         | M02255_77_000000000-ADUT3_1_1105_17063_22789 T---AC---GT-AG-GGA-----GCA-A-G-----C-G--T---T-AT-C-CGG-AA-----TT-A--C-T-GG-GT-----GT--A---AA-GG-GA-GT-----G-TA-G-G-C-G-----G--G-AT-T-A-C-----AA---G-T-C-A-----G-A-T--G--TG--A-AA-AC--T-G-TG-G-G----CT-C-AA-----C-T-C-A-C-A-G--A-T---T-G--C-A--T-T-----T-GA-A-A--C-----T-A-T-AG--T-T-C---T-T-G-A-G-T-G---A-AG----TA-G-A-----G-G-T-A--AG-T-----GG--A--ATT---C-T-A-GT--GT-A-G-CG-GT--G---A-A-A---TG-C-GT-AG--AT-A-TT--A-G--G-A-G-G-A-AC-A-TC--AG--T--G--GC-GAA-G--G-C-G-----A-C-T-T-A---CTG-G--GC-T-T-----T-A--A-C-T--GA--CG-C-T-G--A-GG--C-T-CG-A--AA-G-C---G-TG--GG-G--AG-C-A-AA-----CA--GG Bacteria(100);Firmicutes(100);Clostridia(100);Clostridiales(100);unclassified(100);unclassified(100);unclassified(100);unclassified(100);unclassified(100);                  |   |   |   |   |   |   |   |   |   |   |   |   |   |   |   |   |   |   |   |   |   |   |   |   |   |    |  |
| Otu1216 | 0                                                                                                                                                                                                                                                                                                                                                                                                                                                                                                                                                                                                                                                                                                                                                                                                                    | 0 | 0 | 0 | 0 | 0 | 0 | 0 | 0 | 0 | 0 | 0 | 0 | 0 | 0 | 0 | 0 | 0 | 0 | 0 | 0 | 0 | 0 | 0 | 0 | 0 | 0  |  |
|         | 0                                                                                                                                                                                                                                                                                                                                                                                                                                                                                                                                                                                                                                                                                                                                                                                                                    | 0 | 0 | 0 | 0 | 0 | 0 | 0 | 0 | 0 | 0 | 0 | 0 | 0 | 0 | 0 | 0 | 0 | 0 | 0 | 0 | 0 | 0 | 0 | 0 | 0 | 0  |  |
|         | 0                                                                                                                                                                                                                                                                                                                                                                                                                                                                                                                                                                                                                                                                                                                                                                                                                    | 0 | 0 | 0 | 0 | 0 | 0 | 0 | 0 | 0 | 0 | 0 | 0 | 0 | 0 | 0 | 0 | 0 | 0 | 0 | 0 | 0 | 0 | 0 | 0 | 0 | 50 |  |
|         | 0                                                                                                                                                                                                                                                                                                                                                                                                                                                                                                                                                                                                                                                                                                                                                                                                                    | 0 | 0 | 0 | 0 | 0 | 0 | 0 | 0 | 0 | 0 | 0 | 0 | 0 | 0 | 0 | 0 | 0 | 0 | 0 | 0 | 0 | 0 | 0 | 0 | 0 |    |  |
|         | M02255_77_000000000-ADUT3_1_1103_15167_16095 T---AC---GT-AG-GTG-----GCG-A-G-----C-G--T---T-AT-C-CGG-AA-----TT-A--C-T-GG-GT-----GT--A---AA-GG-GT-GT-----G-TA-G-G-C-G-----G--G-GA-A-G-C-----AA---G-T-C-A-----G-A-T--G--TG--A-AA-AC--C-A-AA-G-G----CT-C-AA-----C-C-T-T-T-G-G--C-T---T-G--C-A--T-T-----T--GA-A-A--C-----T-G-T-TT--T-T-C---T-T-G-A-G-A-G---T-GG----GA-G-A-----G-G-T-A--AA-C-----GG--A--ATT---C-T-A-GT--GT-A-G-TA-GT--G---A-A-A---TG-C-GT-AG--AT-A-TT--A-G--G-A-G-G-A-AC-A-CC--GG--T--G--GC-GAA-G--G-C-G-----G--T-T-T-A---CTG-G--AC-C-A-----C-A--A-C-T--GA--CG-C-T-G--A-GA--C-A-CG-A--AA-G-C---G-TG--GG-G--AG-C-A-AA-----CA--GG Bacteria(100);unclassified(100);unclassified(100);unclassified(100);unclassified(100);unclassified(100);unclassified(100);unclassified(100);unclassified(100);             |   |   |   |   |   |   |   |   |   |   |   |   |   |   |   |   |   |   |   |   |   |   |   |   |   |    |  |
| Otu1217 | 0                                                                                                                                                                                                                                                                                                                                                                                                                                                                                                                                                                                                                                                                                                                                                                                                                    | 0 | 0 | 0 | 0 | 0 | 0 | 0 | 0 | 0 | 0 | 0 | 0 | 0 | 0 | 0 | 0 | 0 | 0 | 0 | 0 | 0 | 0 | 0 | 0 | 0 | 0  |  |
|         | 0                                                                                                                                                                                                                                                                                                                                                                                                                                                                                                                                                                                                                                                                                                                                                                                                                    | 0 | 0 | 0 | 0 | 0 | 0 | 0 | 0 | 0 | 0 | 0 | 0 | 0 | 0 | 0 | 0 | 0 | 0 | 0 | 0 | 0 | 0 | 0 | 0 | 0 | 0  |  |
|         | 0                                                                                                                                                                                                                                                                                                                                                                                                                                                                                                                                                                                                                                                                                                                                                                                                                    | 0 | 0 | 0 | 0 | 0 | 0 | 0 | 0 | 0 | 0 | 0 | 0 | 0 | 0 | 0 | 0 | 0 | 0 | 0 | 0 | 0 | 0 | 0 | 0 | 0 | 3  |  |
|         | 2                                                                                                                                                                                                                                                                                                                                                                                                                                                                                                                                                                                                                                                                                                                                                                                                                    | 0 | 3 | 0 | 0 | 0 | 0 | 0 | 0 | 0 | 0 | 0 | 0 | 0 | 0 | 0 | 0 | 0 | 0 | 0 | 0 | 0 | 0 | 0 | 0 | 0 | 1  |  |
|         | M02255_76_000000000-ADUNE_1_2115_6267_9939 C---TA---AC-TC-TGT-----GCC-A-G-----C---A--G--CC-G-CGG-TA-----AT-A--C-A-GA-GG-----GT-----GC-GA-GC-G-----T-TA-A-T-C-G-----G--C-TA-A-T-T-----GA---G-T-C-G-----G-A-T--G--TG--A-AA-TC--C-C-CG-A-G----CT-T-AA-----C-T-T-G-G-G-A--A-T---T-G--C-A--T-T-----C-GA-T-A--C-----T-G-G--TT--A-G-C---T-A-G-A-G-T-G---T-GG----GA-G-A-----G-G-A-T--GG-T-----AG--A--ATT---C-C-A-G-GT--GT-A-G-CG-GT--G---A-A-A---TG-C-GT-AG--AG-A-TC--T-G--G-A-G-G-A-AT-A-CC--GA--T--G--GC-GAA-G--G-C-A-----G--C-C-A-T---CTG-G--CC-T-A-----A-C---A-C-T--GA--CG-C-T-G--A-GG--T-A-CG-A--AA-G-C---A-TG--GG-G--AG-C-A-AA-----CA--GG Bacteria(100);Proteobacteria(100);Gammaproteobacteria(100);Pseudomonadales(100);Moraxellaceae(100);Acinetobacter(100);unclassified(100);unclassified(100);unclassified(100); |   |   |   |   |   |   |   |   |   |   |   |   |   |   |   |   |   |   |   |   |   |   |   |   |   |    |  |
| Otu1218 | 0                                                                                                                                                                                                                                                                                                                                                                                                                                                                                                                                                                                                                                                                                                                                                                                                                    | 0 | 0 | 0 | 0 | 0 | 0 | 0 | 0 | 0 | 0 | 0 | 0 | 0 | 0 | 0 | 0 | 0 | 0 | 0 | 0 | 0 | 0 | 0 | 0 | 0 | 0  |  |
|         | 0                                                                                                                                                                                                                                                                                                                                                                                                                                                                                                                                                                                                                                                                                                                                                                                                                    | 0 | 0 | 0 | 0 | 0 | 0 | 0 | 0 | 0 | 0 | 0 | 0 | 0 | 0 | 0 | 0 | 0 | 0 | 0 | 0 | 0 | 0 | 0 | 0 | 0 | 0  |  |
|         | 0                                                                                                                                                                                                                                                                                                                                                                                                                                                                                                                                                                                                                                                                                                                                                                                                                    | 0 | 0 | 0 | 0 | 0 | 0 | 0 | 0 | 0 | 0 | 0 | 0 | 0 | 0 | 0 | 0 | 0 | 0 | 0 | 0 | 0 | 0 | 0 | 0 | 0 | 20 |  |
|         | 0                                                                                                                                                                                                                                                                                                                                                                                                                                                                                                                                                                                                                                                                                                                                                                                                                    | 0 | 0 | 0 | 0 | 0 | 0 | 0 | 0 | 0 | 0 | 0 | 0 | 0 | 0 | 0 | 0 | 0 | 0 | 0 | 0 | 0 | 0 | 0 | 0 | 0 |    |  |
|         | M02255_77_000000000-ADUT3_1_2104_6270_10883 T---AC---GT-AG-GGT-----GCG-A-G-----C-G--T---T-AT-C-CGG-AT-----TT-A---T-----T-----GG-G--C-----G-TA-G-G-C-G-----G--T-TC-G-T-C-----GC---G-T-C-C-----G-G-T--                                                                                                                                                                                                                                                                                                                                                                                                                                                                                                                                                                                                                 |   |   |   |   |   |   |   |   |   |   |   |   |   |   |   |   |   |   |   |   |   |   |   |   |   |    |  |



|                                                                                                                                                                                                                              |   |   |   |   |   |   |   |   |   |   |   |   |   |   |   |   |   |   |   |   |   |   |   |   |    |   |   |
|------------------------------------------------------------------------------------------------------------------------------------------------------------------------------------------------------------------------------|---|---|---|---|---|---|---|---|---|---|---|---|---|---|---|---|---|---|---|---|---|---|---|---|----|---|---|
| Otu1220                                                                                                                                                                                                                      | 0 | 0 | 0 | 0 | 0 | 0 | 0 | 0 | 0 | 0 | 0 | 0 | 0 | 0 | 0 | 0 | 0 | 0 | 0 | 0 | 0 | 0 | 0 | 0 | 0  | 0 | 0 |
|                                                                                                                                                                                                                              | 0 | 0 | 0 | 0 | 0 | 0 | 0 | 0 | 0 | 0 | 0 | 0 | 0 | 0 | 0 | 0 | 0 | 0 | 0 | 0 | 0 | 0 | 0 | 0 | 0  | 0 |   |
|                                                                                                                                                                                                                              | 0 | 0 | 0 | 0 | 0 | 0 | 0 | 0 | 0 | 0 | 0 | 0 | 0 | 0 | 0 | 0 | 0 | 0 | 0 | 0 | 0 | 0 | 0 | 0 | 22 | 0 |   |
|                                                                                                                                                                                                                              | 0 | 0 | 0 | 0 | 0 | 0 | 0 | 0 | 0 | 0 | 0 | 0 | 0 | 0 | 0 | 0 | 0 | 0 | 0 | 0 | 0 | 0 | 0 | 0 | 0  |   |   |
| M02255_76_000000000-ADUNE_1_1106_6775_11584 C---CG---GC-TA-ACT-----TCG-T-G-----C--C--A---G--CA-G-CCG-CG-----GT-A--A-T--AC-GA-----AG--G-----GT-GC-GA-GC-----G-TT-GTT-C-G-----G--G-AG-C-T-T-----                               |   |   |   |   |   |   |   |   |   |   |   |   |   |   |   |   |   |   |   |   |   |   |   |   |    |   |   |
| AA---G-T-C-A-----A-G-T--G--TG--A-AA-TC--C-C-CA-G-G-----CT-C-AA-----C-C-T-G-G-G-A--C-G---T-G--C-A--C--C-----T--GA-A-A--C-----T--G-G-GC--T-T-C---T-T-G-A-A-T--C---T-TG-----GA-G-A-----G-G-G-T---GA-T-----GG--A--ATT---G-C-T-   |   |   |   |   |   |   |   |   |   |   |   |   |   |   |   |   |   |   |   |   |   |   |   |   |    |   |   |
| G-GT--GT-A-G-GA-GT--G---A--C-A---TC-C-GT-AG--AG-A-TC--A-G--C-A-G-G-A-AC-A-CC--GG--A--G--GC-GAA-G--G-C-G-----A--T-C-A-C---CTG--G--CC-A-A-----A-G---A-T-T--GA--CG-C-T-G--A-GG--A-A-CG-A--AA-G-C---G-TG--GG-G--                 |   |   |   |   |   |   |   |   |   |   |   |   |   |   |   |   |   |   |   |   |   |   |   |   |    |   |   |
| AG-C-A-AA-----CA--GG Bacteria(100);unclassified(100);unclassified(100);unclassified(100);unclassified(100);unclassified(100);unclassified(100);unclassified(100);unclassified(100);                                          |   |   |   |   |   |   |   |   |   |   |   |   |   |   |   |   |   |   |   |   |   |   |   |   |    |   |   |
| Otu1221                                                                                                                                                                                                                      | 0 | 0 | 0 | 0 | 0 | 0 | 0 | 0 | 0 | 0 | 0 | 0 | 0 | 0 | 0 | 0 | 0 | 0 | 0 | 0 | 0 | 0 | 0 | 0 | 0  | 0 |   |
|                                                                                                                                                                                                                              | 0 | 0 | 0 | 0 | 0 | 0 | 0 | 0 | 0 | 0 | 0 | 0 | 0 | 0 | 0 | 0 | 0 | 0 | 0 | 0 | 0 | 0 | 0 | 0 | 0  | 0 |   |
|                                                                                                                                                                                                                              | 0 | 0 | 0 | 0 | 0 | 0 | 0 | 0 | 0 | 0 | 0 | 0 | 0 | 0 | 0 | 0 | 0 | 0 | 0 | 0 | 0 | 0 | 0 | 0 | 52 | 0 |   |
|                                                                                                                                                                                                                              | 0 | 0 | 0 | 0 | 0 | 0 | 0 | 0 | 0 | 0 | 0 | 0 | 0 | 0 | 0 | 0 | 0 | 0 | 0 | 0 | 0 | 0 | 0 | 0 | 0  |   |   |
| M02255_77_000000000-ADUT3_1_1114_6905_11830 T---AC---GA-AG-GGG-----GCT-A-G-----C--G--T---T--GC-T-CGG-AA-----TC-A--C-T--GG-GC-----GT--A-----AA-GC-GC-AC-----G-TA-G-G-C-G-----G--A-TC-G-T-T-----                               |   |   |   |   |   |   |   |   |   |   |   |   |   |   |   |   |   |   |   |   |   |   |   |   |    |   |   |
| AA---G-T-C-A-----G-G-G--G--TG--A-AA-TC--C-T-GG-G-G-----CT-C-AA-----C-C-T-C-A-G-A--A-C---T-G--C-C--C--T-----T--GA-T-A--C-----T--G-G--CG--A-T-C---T-C-G-A-G-T--T---C-GA---GA-G-A-----G-G-T-T---GG-T-----GG--A--ACT---C-C-G-    |   |   |   |   |   |   |   |   |   |   |   |   |   |   |   |   |   |   |   |   |   |   |   |   |    |   |   |
| A-GT--GT-A-G-AG-GT--G---A--A-A---TT-C-GT-AG--AT-A-TT--C-G--G-A-A-G-A-AC-A-CC--AG--T--G--GC-GAA-G--G-C-G-----G--C-C-A-A---CTG--G--CT-C-G-----A-T---A-C-T--GA--CG-C-T-G--A-GG--T-G-CG-A--AA-G-C---G-TG--GG-G--                 |   |   |   |   |   |   |   |   |   |   |   |   |   |   |   |   |   |   |   |   |   |   |   |   |    |   |   |
| AG-C-A-AA-----CA--GG Bacteria(100);Proteobacteria(100);Alphaproteobacteria(100);Rhizobiales(100);Hyphomicrobiaceae(100);unclassified(100);unclassified(100);unclassified(100);unclassified(100);                             |   |   |   |   |   |   |   |   |   |   |   |   |   |   |   |   |   |   |   |   |   |   |   |   |    |   |   |
| Otu1222                                                                                                                                                                                                                      | 0 | 0 | 0 | 0 | 0 | 0 | 0 | 0 | 0 | 0 | 0 | 0 | 0 | 0 | 0 | 0 | 0 | 0 | 0 | 0 | 0 | 0 | 0 | 0 | 0  | 0 |   |
|                                                                                                                                                                                                                              | 0 | 0 | 0 | 0 | 0 | 0 | 0 | 0 | 0 | 0 | 0 | 0 | 0 | 0 | 0 | 0 | 0 | 0 | 0 | 0 | 0 | 0 | 0 | 0 | 0  | 0 |   |
|                                                                                                                                                                                                                              | 0 | 0 | 0 | 0 | 0 | 0 | 0 | 0 | 0 | 0 | 0 | 0 | 0 | 0 | 0 | 0 | 0 | 0 | 0 | 0 | 0 | 0 | 0 | 0 | 10 | 0 |   |
|                                                                                                                                                                                                                              | 0 | 0 | 0 | 0 | 0 | 0 | 0 | 0 | 0 | 0 | 0 | 0 | 0 | 0 | 0 | 0 | 0 | 0 | 0 | 0 | 0 | 0 | 0 | 0 | 0  |   |   |
| M02255_77_000000000-ADUT3_1_1110_10703_2323 T---A---AG-CA-CCG-----GCT-A-A-----C-----T---C--TG-T-GCC-AG-----CA-G--C-C--GC-G-----GT--A---AT-AC-AG-TA-----G-GG-T-G-C-----G--A-GC-G-T-T-----AA---                                |   |   |   |   |   |   |   |   |   |   |   |   |   |   |   |   |   |   |   |   |   |   |   |   |    |   |   |
| G-T-C-G-----G-A-T--G--TG--A-CA-TC--C-C-TG-A-G-----CT-T-AA-----C-T-T-A-G-G-A--A-T---T-G--C-A--T--T-----C--GA-T-A--C-----T--G-G--GA--A-G-C---T-A-G-A-G-T--A--T-GG-----GA-G-A-----G-G-A-T---GG-T-----AG--A--ATT---C-C-A-G-GT--  |   |   |   |   |   |   |   |   |   |   |   |   |   |   |   |   |   |   |   |   |   |   |   |   |    |   |   |
| GT-A-G-CG-GT--G---A--A-A---TG-C-GT-AG--AG-A-TC--T-G--G-A-G-G-A-AT-A-CC--GA--T--G--GC-GAA-G--G-C-A-----G--C-C-A-T---CTG--G--CC-T-A-----A-T---A-C-T--GA--CG-C-T-G--A-GG--T-A-CG-A--AA-G-C---A-TG--GG-G--AG-C-A-                |   |   |   |   |   |   |   |   |   |   |   |   |   |   |   |   |   |   |   |   |   |   |   |   |    |   |   |
| AA-----CA--GG Bacteria(100);Proteobacteria(100);Gammaproteobacteria(100);Pseudomonadales(100);Moraxellaceae(100);Acinetobacter(100);unclassified(100);unclassified(100);unclassified(100);                                   |   |   |   |   |   |   |   |   |   |   |   |   |   |   |   |   |   |   |   |   |   |   |   |   |    |   |   |
| Otu1223                                                                                                                                                                                                                      | 0 | 0 | 0 | 0 | 0 | 0 | 0 | 0 | 0 | 0 | 0 | 0 | 0 | 0 | 0 | 0 | 0 | 0 | 0 | 0 | 0 | 0 | 0 | 0 | 0  | 0 |   |
|                                                                                                                                                                                                                              | 0 | 0 | 0 | 0 | 0 | 0 | 0 | 0 | 0 | 0 | 0 | 0 | 0 | 0 | 0 | 0 | 0 | 0 | 0 | 0 | 0 | 0 | 0 | 0 | 0  | 0 |   |
|                                                                                                                                                                                                                              | 0 | 0 | 0 | 0 | 0 | 0 | 0 | 0 | 0 | 0 | 0 | 0 | 0 | 0 | 0 | 0 | 0 | 0 | 0 | 0 | 0 | 0 | 0 | 0 | 27 | 0 |   |
|                                                                                                                                                                                                                              | 0 | 0 | 0 | 0 | 0 | 0 | 0 | 0 | 0 | 0 | 0 | 0 | 0 | 0 | 0 | 0 | 0 | 0 | 0 | 0 | 0 | 0 | 0 | 0 | 0  |   |   |
| M02255_77_000000000-ADUT3_1_1109_15675_18273 T---AC---GG-AA-GGG-----GCT-A-G-----C--G--T---T--GT-T-CGG-AA-----TT-A--C-T--GG-GC-----GT--A-----AA-GC-GC-GC-----G-TA-G-G-C-G-----G--C-TT-T-T-C-----                              |   |   |   |   |   |   |   |   |   |   |   |   |   |   |   |   |   |   |   |   |   |   |   |   |    |   |   |
| -----AA---G-T-G-A-----G-G-C--G--TG--A-AA-GT--C-C-TG-G-G-----CT-C-AA-----C-C-T-G-G-G-G--A-C---G-G--C-G--C--T-----T--CA-G-A--C-----T--G-T--TT--G-G-C---T-A-G-A-G-T--C---C-GG---AA-G-A-----G-G-G-T---GG-T-----GG--A--ATT---     |   |   |   |   |   |   |   |   |   |   |   |   |   |   |   |   |   |   |   |   |   |   |   |   |    |   |   |
| C-C-G-A-GT--GT-A-G-AG-GT--G---A--A-A---TT-C-GT-AG--AT-A-TT--C-G--G-A-G-G-A-AC-A-CC--GG--T--G--GC-GAA-G--G-C-G-----G--C-C-A-C---CTG--G--TC-C-G-----G-T---A-C-T--GA--CG-C-T-C--A-AG--T-G-CG-A--AA-G-C---G-TG--GG-              |   |   |   |   |   |   |   |   |   |   |   |   |   |   |   |   |   |   |   |   |   |   |   |   |    |   |   |
| G--AG-C-A-AA-----CA--GG Bacteria(100);Proteobacteria(100);Alphaproteobacteria(100);Rhodospirillales(100);Rhodospirillaceae(100);Defluviicoccus(100);unclassified(100);unclassified(100);unclassified(100);                   |   |   |   |   |   |   |   |   |   |   |   |   |   |   |   |   |   |   |   |   |   |   |   |   |    |   |   |
| Otu1224                                                                                                                                                                                                                      | 0 | 0 | 0 | 0 | 0 | 0 | 0 | 0 | 0 | 0 | 0 | 0 | 0 | 0 | 0 | 0 | 0 | 0 | 0 | 0 | 0 | 0 | 0 | 0 | 0  | 0 |   |
|                                                                                                                                                                                                                              | 0 | 0 | 0 | 0 | 0 | 0 | 0 | 0 | 0 | 0 | 0 | 0 | 0 | 0 | 0 | 0 | 0 | 0 | 0 | 0 | 0 | 0 | 0 | 0 | 0  | 0 |   |
|                                                                                                                                                                                                                              | 0 | 0 | 0 | 0 | 0 | 0 | 0 | 0 | 0 | 0 | 0 | 0 | 0 | 0 | 0 | 0 | 0 | 0 | 0 | 0 | 0 | 0 | 0 | 0 | 48 | 7 |   |
|                                                                                                                                                                                                                              | 0 | 0 | 0 | 0 | 0 | 0 | 0 | 0 | 0 | 0 | 0 | 0 | 0 | 0 | 0 | 0 | 0 | 0 | 0 | 0 | 0 | 0 | 0 | 0 | 0  |   |   |
| M02255_76_000000000-ADUNE_1_2112_16320_24833 T---AA---CT-AT-GT-----GCC-A-G-----C--A--G---T--CG-C-GGT-AA-----TA-C--A-T--AG-GT-----TG--C-----AA-GC-GT-TA-----T-CC-G-G---G-----G--A-TT-A-A-T-----                               |   |   |   |   |   |   |   |   |   |   |   |   |   |   |   |   |   |   |   |   |   |   |   |   |    |   |   |
| --AA---G-T-C-T-----G-G-T--G--TT--A-AA-GG--C-A-AC-T-G-----CT-T-AA-----C-G-G-T-T-G-T-A-----T-G--C-A--T--T-----G--GA-A-A--C-----T--A-T--TA--G-T-C---T-A-G-A-G-T--G---T-GG-----TA-G-G-----G-A-G-T---TC-T-----GG--A--ACT---C-C-A- |   |   |   |   |   |   |   |   |   |   |   |   |   |   |   |   |   |   |   |   |   |   |   |   |    |   |   |
| T-GT--GG-A-G-CG-GT--G---G--A-A---TG-C-GT-AG--AT-A-TA--T-G--G-A-A-G-A-AC-A-CC--AG--T--G--GC-GAA-G--G-C-G-----A--G-A-A-C---TTA--G--GC-C-A-----T-T---A-C-T--GA--CG-C-T-T--A-GG--C-T-TG-A--AA-G-T---G-TG--GG-G--AG-              |   |   |   |   |   |   |   |   |   |   |   |   |   |   |   |   |   |   |   |   |   |   |   |   |    |   |   |
| C-A-AA-----TA--GG Bacteria(100);Firmicutes(100);Mollicutes(100);unclassified(100);unclassified(100);unclassified(100);unclassified(100);unclassified(100);unclassified(100);                                                 |   |   |   |   |   |   |   |   |   |   |   |   |   |   |   |   |   |   |   |   |   |   |   |   |    |   |   |



|                                                                                                                                                                                                                        |    |   |   |    |   |   |   |   |   |   |   |   |   |   |   |   |   |    |    |   |   |   |   |   |     |   |   |
|------------------------------------------------------------------------------------------------------------------------------------------------------------------------------------------------------------------------|----|---|---|----|---|---|---|---|---|---|---|---|---|---|---|---|---|----|----|---|---|---|---|---|-----|---|---|
| Otu1225                                                                                                                                                                                                                | 0  | 0 | 0 | 0  | 0 | 0 | 0 | 0 | 0 | 0 | 0 | 0 | 0 | 0 | 0 | 0 | 0 | 0  | 0  | 0 | 0 | 0 | 0 | 0 | 0   | 0 | 0 |
|                                                                                                                                                                                                                        | 0  | 0 | 0 | 0  | 0 | 0 | 0 | 0 | 0 | 0 | 0 | 0 | 0 | 0 | 0 | 0 | 0 | 0  | 0  | 0 | 0 | 0 | 0 | 0 | 0   | 0 | 0 |
|                                                                                                                                                                                                                        | 0  | 0 | 0 | 0  | 0 | 0 | 0 | 0 | 0 | 0 | 0 | 0 | 0 | 0 | 0 | 0 | 0 | 0  | 0  | 0 | 0 | 0 | 0 | 0 | 13  | 0 | 0 |
|                                                                                                                                                                                                                        | 2  | 0 | 0 | 0  | 0 | 0 | 0 | 0 | 0 | 0 | 4 | 1 | 0 | 0 | 0 | 0 | 0 | 0  | 0  | 0 | 0 | 0 | 0 | 0 | 0   | 0 |   |
| M02255_76_000000000-ADUNE_1_1106_9338_11659 T---AC---GT-AG-GGG-----GCA-A-G-----C--G--T---T--AT-C-CGG-AT-----TT-A--C-T--GG-GT-----GT--A----AA---G--G-----G--A-G--C-----A-GT-A-G-----A---G-                              |    |   |   |    |   |   |   |   |   |   |   |   |   |   |   |   |   |    |    |   |   |   |   |   |     |   |   |
| T-C-T-----G-A-T--G--TG--A-AA-GG--C-G-GG-G-G-----CT-C-AA-----C-C-C-C-G-G--A-C---T-G--C-A---T-T-----G--GA-A-A--C-----T-G-T--TG--A-T-C---T-T-G-A-G-T--A--C-CG---GA-G-A-----G-G-T-A--AG-C-----GG--A--ATT---C-C-T-A-GT--    |    |   |   |    |   |   |   |   |   |   |   |   |   |   |   |   |   |    |    |   |   |   |   |   |     |   |   |
| GT-A-G-CG-GT--G---A--A---TG-C-GT-AG--AT-A-TT--A-G--G-A-G-G-A-AC-A-CC---AG--T--G--GC-GAA-G--G-C-G-----G--C-T-T-A--CTG--G--AC-G-G-----T-A---A-C-T--GA--CG-T-T-G--A-GG--C-T-CG-A--AA-G-C---G-TG--GG-G--AG-C-A-            |    |   |   |    |   |   |   |   |   |   |   |   |   |   |   |   |   |    |    |   |   |   |   |   |     |   |   |
| AA-----CA--GG Bacteria(100);Firmicutes(100);Clostridia(100);Clostridiales(100);Lachnospiraceae(100);Blautia(100);unclassified(100);unclassified(100);unclassified(100);                                                |    |   |   |    |   |   |   |   |   |   |   |   |   |   |   |   |   |    |    |   |   |   |   |   |     |   |   |
| Otu1226                                                                                                                                                                                                                | 0  | 0 | 0 | 0  | 0 | 0 | 0 | 0 | 0 | 0 | 0 | 0 | 0 | 0 | 0 | 0 | 0 | 0  | 0  | 0 | 0 | 0 | 0 | 0 | 0   | 0 | 0 |
|                                                                                                                                                                                                                        | 0  | 0 | 0 | 0  | 0 | 0 | 0 | 0 | 0 | 0 | 0 | 0 | 0 | 0 | 0 | 0 | 0 | 0  | 0  | 0 | 0 | 0 | 0 | 0 | 0   | 0 | 0 |
|                                                                                                                                                                                                                        | 0  | 0 | 0 | 0  | 0 | 0 | 0 | 0 | 0 | 0 | 0 | 0 | 0 | 0 | 0 | 0 | 0 | 0  | 0  | 0 | 0 | 0 | 0 | 0 | 520 | 0 | 0 |
|                                                                                                                                                                                                                        | 12 | 0 | 0 | 40 | 0 | 0 | 0 | 0 | 0 | 0 | 0 | 0 | 0 | 0 | 0 | 0 | 0 | 0  | 0  | 0 | 0 | 0 | 0 | 0 | 0   | 0 |   |
| M02255_77_000000000-ADUT3_1_1101_12680_11432 T---AC--GA-AG-GGT-----GCT-A-G-----C--G--T---T--GT-T-CGG-AA-----TC-A--C-T--GG-GC-----GT--A----AA-GC-GC-GC-----G-TA-G-G-C-G-----G--C-GT-T-T-C-----                          |    |   |   |    |   |   |   |   |   |   |   |   |   |   |   |   |   |    |    |   |   |   |   |   |     |   |   |
| -----AA---G-T-C-A-----G-G-G--G--TG--A-AA-TC--C-C-GA-G-G-----CT-C-AA-----C-C-T-C-G-G-A-A-T---T-G--C-C---T-T-----T--GA-A-A--C-----T-G-A-AA--C-G-C---T-A-G-A-A-T-A--T-CG---GA-G-G-----G-G-A-T--AG-C-----GG--A--ATT---T-   |    |   |   |    |   |   |   |   |   |   |   |   |   |   |   |   |   |    |    |   |   |   |   |   |     |   |   |
| C-T-A-AT--GT-A-G-CG-GT--G---A--A---TG-C-GT-AG--AT-A-TT--A-G--A-A-G-G-A-AC-A-CC---GG--T--G--GC-GAA-G--G-C-G-----G--C-T-A-T--CTG--G--AC-G-A-----T-T---A-T-T--GA--CG-C-T-G--A-GG--C-G-CG-A--AA-G-C---G-TG--GG-G-          |    |   |   |    |   |   |   |   |   |   |   |   |   |   |   |   |   |    |    |   |   |   |   |   |     |   |   |
| -AT-C-A-AA-----CA--GG Bacteria(100);unclassified(100);unclassified(100);unclassified(100);unclassified(100);unclassified(100);unclassified(100);unclassified(100);unclassified(100);                                   |    |   |   |    |   |   |   |   |   |   |   |   |   |   |   |   |   |    |    |   |   |   |   |   |     |   |   |
| Otu1227                                                                                                                                                                                                                | 0  | 0 | 0 | 0  | 0 | 0 | 0 | 0 | 0 | 0 | 0 | 0 | 0 | 0 | 0 | 0 | 0 | 0  | 0  | 0 | 0 | 0 | 0 | 0 | 0   | 0 | 0 |
|                                                                                                                                                                                                                        | 0  | 0 | 0 | 0  | 0 | 0 | 0 | 0 | 0 | 0 | 0 | 0 | 0 | 0 | 0 | 0 | 0 | 0  | 0  | 0 | 0 | 0 | 0 | 0 | 0   | 0 | 0 |
|                                                                                                                                                                                                                        | 0  | 0 | 0 | 0  | 0 | 0 | 0 | 0 | 0 | 0 | 0 | 0 | 0 | 0 | 0 | 0 | 0 | 0  | 0  | 0 | 0 | 0 | 0 | 0 | 0   | 0 | 0 |
|                                                                                                                                                                                                                        | 0  | 0 | 0 | 0  | 0 | 0 | 0 | 0 | 0 | 0 | 0 | 0 | 0 | 0 | 0 | 0 | 0 | 0  | 39 | 0 | 0 | 0 | 0 | 0 | 0   | 0 |   |
| M02255_77_000000000-ADUT3_1_1102_10488_19348 T---AC--GG-AG-GGG-----GCT-A-G-----C--G--T---T--GT-T-CGG-AA-----TT-A--C-T--GG-GC-----GT--A----AA-GC-GC-GC-----G-TA-G-G-C-G-----G--C-TT-T-G-T-----                          |    |   |   |    |   |   |   |   |   |   |   |   |   |   |   |   |   |    |    |   |   |   |   |   |     |   |   |
| -----AA---G-T-C-A-----G-A-G--G--TG--A-AA-TC--C-C-GG-G-G-----CT-C-AA-----C-T-C-C-G-G-A-A-C---T-G--C-C---T-T-----T--GA-A-A--C-----T-G-C-AT--C-G-C---T-T-G-A-A-T-G---T-CG---GA-G-A-----G-G-T-G--AG-T-----GG--A--ATT---C-  |    |   |   |    |   |   |   |   |   |   |   |   |   |   |   |   |   |    |    |   |   |   |   |   |     |   |   |
| C-G-A-GT--GT-A-G-AG-GT--G---A--A---TT-C-GT-AG--AT-A-TT--C-G--G-A-A-G-A-AC-A-CC---AG--T--G--GC-GAA-G--G-C-G-----G--C-T-C-A--CTG--G--AC-G-A-----C-T---A-T-T--GA--CG-C-T-G--A-GG--T-G-CG-A--AA-G-C---G-TG--GG-            |    |   |   |    |   |   |   |   |   |   |   |   |   |   |   |   |   |    |    |   |   |   |   |   |     |   |   |
| G--AG-C-A-AA-----CA--GG Bacteria(100);Proteobacteria(100);Alphaproteobacteria(100);unclassified(100);unclassified(100);unclassified(100);unclassified(100);unclassified(100);unclassified(100);                        |    |   |   |    |   |   |   |   |   |   |   |   |   |   |   |   |   |    |    |   |   |   |   |   |     |   |   |
| Otu1228                                                                                                                                                                                                                | 0  | 0 | 0 | 0  | 0 | 0 | 0 | 0 | 0 | 0 | 0 | 0 | 0 | 0 | 0 | 0 | 0 | 0  | 0  | 0 | 0 | 0 | 0 | 0 | 0   | 0 | 0 |
|                                                                                                                                                                                                                        | 0  | 0 | 0 | 0  | 0 | 0 | 0 | 0 | 0 | 0 | 0 | 0 | 0 | 0 | 0 | 0 | 0 | 0  | 0  | 0 | 0 | 0 | 0 | 0 | 0   | 0 | 0 |
|                                                                                                                                                                                                                        | 0  | 0 | 0 | 0  | 0 | 0 | 0 | 0 | 0 | 0 | 0 | 0 | 0 | 0 | 0 | 0 | 0 | 0  | 0  | 0 | 0 | 0 | 0 | 0 | 0   | 0 | 0 |
|                                                                                                                                                                                                                        | 0  | 0 | 0 | 0  | 0 | 0 | 0 | 0 | 0 | 0 | 0 | 0 | 0 | 0 | 0 | 0 | 0 | 14 | 0  | 0 | 0 | 0 | 0 | 0 | 0   | 0 |   |
| M02255_77_000000000-ADUT3_1_1110_21502_19200 T---AC--GA-AG-GGA-----GCT-A-G-----C--G--T---T--GT-T-CGG-AA-----TT-A--C-T--GG-GC-----GT--A----AA-GG-GC-GC-----G-TA-G-G-C-G-----G--C-CT-T-G-T-----                          |    |   |   |    |   |   |   |   |   |   |   |   |   |   |   |   |   |    |    |   |   |   |   |   |     |   |   |
| -----AA---G-T-C-A-----G-A-T--G--TG--A-AA-GC--C-C-CG-G-G-----CT-T-AA-----C-C-T-G-G-G-A-A-C---T-G--C-A---T-T-----T--GA-T-A--C-----T-G-C-AA--G-G-C---T-A-G-A-G-A-A--T-GT---GA-G-A-----G-G-T-A--AG-T-----GG--A--ATT---A-   |    |   |   |    |   |   |   |   |   |   |   |   |   |   |   |   |   |    |    |   |   |   |   |   |     |   |   |
| T-G-A-GT--GT-A-G-AG-GT--G---A--A---TT-C-GT-AG--AT-A-TT--C-A--T-A-A-G-A-AC-A-TC---AG--T--G--GC-GAA-G--G-C-G-----G--C-T-T-A--CTG--G--CA-C-A-----T-T---A-C-T--GA--CG-C-T-A--A-GG--C-G-CG-A--AA-G-C---G-TG--GG-G--         |    |   |   |    |   |   |   |   |   |   |   |   |   |   |   |   |   |    |    |   |   |   |   |   |     |   |   |
| AG-C-A-AA-----CA--GG Bacteria(100);Proteobacteria(100);unclassified(100);unclassified(100);unclassified(100);unclassified(100);unclassified(100);unclassified(100);unclassified(100);                                  |    |   |   |    |   |   |   |   |   |   |   |   |   |   |   |   |   |    |    |   |   |   |   |   |     |   |   |
| Otu1229                                                                                                                                                                                                                | 0  | 0 | 0 | 0  | 0 | 0 | 0 | 0 | 0 | 0 | 0 | 0 | 0 | 0 | 0 | 0 | 0 | 0  | 0  | 0 | 0 | 0 | 0 | 0 | 0   | 0 | 0 |
|                                                                                                                                                                                                                        | 0  | 0 | 0 | 0  | 0 | 0 | 0 | 0 | 0 | 0 | 0 | 0 | 0 | 0 | 0 | 0 | 0 | 0  | 0  | 0 | 0 | 0 | 0 | 0 | 0   | 0 | 0 |
|                                                                                                                                                                                                                        | 0  | 0 | 0 | 0  | 0 | 0 | 0 | 0 | 0 | 0 | 0 | 0 | 0 | 0 | 0 | 0 | 0 | 0  | 0  | 0 | 0 | 0 | 0 | 0 | 0   | 0 | 0 |
|                                                                                                                                                                                                                        | 0  | 0 | 0 | 0  | 0 | 0 | 0 | 0 | 0 | 0 | 0 | 0 | 0 | 0 | 0 | 0 | 0 | 14 | 0  | 0 | 0 | 0 | 0 | 0 | 0   | 0 |   |
| M02255_77_000000000-ADUT3_1_1116_13488_24283 T---AC---GT-AT-GGT-----GCA-A-G-----C--G--T---T--AT-C-CGG-AT-----TT-A--C-T--GG-GT-----GT--A----AA-GG-GA-GC-----G-TA-G-G-C-G-----G--T-TT-T-A-C-----                         |    |   |   |    |   |   |   |   |   |   |   |   |   |   |   |   |   |    |    |   |   |   |   |   |     |   |   |
| -----AA---G-T-C-T-----G-A-T--G--TG--A-AA-GC--C-C-GG-G-G-----CT-C-AA-----C-T-C-C-G-G-T-A-T---T-G--C-A---T-T-----G--GA-A-A--C-----T-G-T--AG--A-A-C---T-A-G-A-G-T-G---T-CG---GA-G-G-----G-G-T-A--AG-T-----GG--A--ATT---C- |    |   |   |    |   |   |   |   |   |   |   |   |   |   |   |   |   |    |    |   |   |   |   |   |     |   |   |
| C-T-A-GT--GT-A-G-CG-GT--G---A--A---TG-C-GT-AG--AT-A-TT--A-G--G-A-G-G-A-AC-A-CC---AG--T--G--GC-GAA-G--G-C-G-----G--C-T-T-A--CTG--G--AC-G-A-----T-T---A-C-T--GA--CG-C-T-G--A-GG--C-T-CG-A--AA-G-C---G-TG--GG-G--         |    |   |   |    |   |   |   |   |   |   |   |   |   |   |   |   |   |    |    |   |   |   |   |   |     |   |   |
| -AG-C-A-AA-----CA--GG Bacteria(100);Firmicutes(100);Clostridia(100);Clostridiales(100);Lachnospiraceae(100);Butyrivibrio-Pseudobutyrvibrio(100);unclassified(100);unclassified(100);unclassified(100);                 |    |   |   |    |   |   |   |   |   |   |   |   |   |   |   |   |   |    |    |   |   |   |   |   |     |   |   |



|                                                                                                                                                                                                                                                                                                                                                                                                                                                                                                                                                                                                                                                                                                                                                                                                              |   |   |   |   |   |   |   |   |   |   |   |   |   |   |   |   |   |   |    |   |   |   |   |   |   |   |   |
|--------------------------------------------------------------------------------------------------------------------------------------------------------------------------------------------------------------------------------------------------------------------------------------------------------------------------------------------------------------------------------------------------------------------------------------------------------------------------------------------------------------------------------------------------------------------------------------------------------------------------------------------------------------------------------------------------------------------------------------------------------------------------------------------------------------|---|---|---|---|---|---|---|---|---|---|---|---|---|---|---|---|---|---|----|---|---|---|---|---|---|---|---|
| Otu1230                                                                                                                                                                                                                                                                                                                                                                                                                                                                                                                                                                                                                                                                                                                                                                                                      | 0 | 0 | 0 | 0 | 0 | 0 | 0 | 0 | 0 | 0 | 0 | 0 | 0 | 0 | 0 | 0 | 0 | 0 | 0  | 0 | 0 | 0 | 0 | 0 | 0 | 0 | 0 |
|                                                                                                                                                                                                                                                                                                                                                                                                                                                                                                                                                                                                                                                                                                                                                                                                              | 0 | 0 | 0 | 0 | 0 | 0 | 0 | 0 | 0 | 0 | 0 | 0 | 0 | 0 | 0 | 0 | 0 | 0 | 0  | 0 | 0 | 0 | 0 | 0 | 0 | 0 | 0 |
|                                                                                                                                                                                                                                                                                                                                                                                                                                                                                                                                                                                                                                                                                                                                                                                                              | 0 | 0 | 0 | 0 | 0 | 0 | 0 | 0 | 0 | 0 | 0 | 0 | 0 | 0 | 0 | 0 | 0 | 0 | 0  | 0 | 0 | 0 | 0 | 0 | 0 | 0 | 0 |
|                                                                                                                                                                                                                                                                                                                                                                                                                                                                                                                                                                                                                                                                                                                                                                                                              | 0 | 0 | 0 | 0 | 0 | 0 | 0 | 0 | 0 | 0 | 0 | 0 | 0 | 0 | 0 | 0 | 0 | 0 | 13 | 0 | 0 | 0 | 0 | 0 | 0 | 0 | 0 |
| M02255_76_000000000-ADUNE_1_1112_24526_5228 T---AA---CT-A-CGT-----GCC-A-G-----C-A-G---C-CG-C-GGT-AA-----TA-C-G-T-AG-GG-----GG-C---GA-GC-G--TT-----G-TC-C-G--G-----A-T-TC-G-G-T-----AA-----G-T-C-C-----G-T-C--G--TG--A-AA-TC--C-T-GA-G-G----CT-C-AA-----C-C-T-T-G-G-A-C-G---T-G--C-G--A-T-----G--GA-T-A--C-----T-G-C-CG--G-G-C---T-G-G-A-G-G-A--T-GG---TA-G-A-----G-G-C-G--AG-T----GG-A-ATT---C-C-C-G-GT--GT-A-G-CG-GT--G---A-A-A--TG-C-GC-AG--AT-A-TC--G-G--G-A-G-G-A-AC-A-CC--AG--T-A-GC-GAA-G-G-C-G-----G-C-T-C-G--CTG--G-GC-C-A-----T-T--C-C-T-GA--CG-C-T-G-A-GA--C-G-CG-A-AA-G-C--T-AG--GG-G--AG-C-G-AA-----CA--GG Bacteria(100);Actinobacteria(100);Actinobacteria(100);Rubrobacteridae(100);Rubrobacterales(100);Rubrobacterineae(100);Rubrobacteriaceae(100);Rubrobacter(100);unclassified(100);      |   |   |   |   |   |   |   |   |   |   |   |   |   |   |   |   |   |   |    |   |   |   |   |   |   |   |   |
| Otu1231                                                                                                                                                                                                                                                                                                                                                                                                                                                                                                                                                                                                                                                                                                                                                                                                      | 0 | 0 | 0 | 0 | 0 | 0 | 0 | 0 | 0 | 0 | 0 | 0 | 0 | 0 | 0 | 0 | 0 | 0 | 0  | 0 | 0 | 0 | 0 | 0 | 0 | 0 | 0 |
|                                                                                                                                                                                                                                                                                                                                                                                                                                                                                                                                                                                                                                                                                                                                                                                                              | 0 | 0 | 0 | 0 | 0 | 0 | 0 | 0 | 0 | 0 | 0 | 0 | 0 | 0 | 0 | 0 | 0 | 0 | 0  | 0 | 0 | 0 | 0 | 0 | 0 | 0 | 0 |
|                                                                                                                                                                                                                                                                                                                                                                                                                                                                                                                                                                                                                                                                                                                                                                                                              | 0 | 0 | 0 | 0 | 0 | 0 | 0 | 0 | 0 | 0 | 0 | 0 | 0 | 0 | 0 | 0 | 0 | 0 | 0  | 0 | 0 | 0 | 0 | 0 | 0 | 0 | 0 |
|                                                                                                                                                                                                                                                                                                                                                                                                                                                                                                                                                                                                                                                                                                                                                                                                              | 0 | 0 | 0 | 0 | 0 | 0 | 0 | 0 | 0 | 0 | 0 | 0 | 0 | 0 | 0 | 0 | 0 | 0 | 9  | 0 | 0 | 0 | 0 | 0 | 0 | 0 | 0 |
| M02255_76_000000000-ADUNE_1_2105_18742_21319 T---AA---CT-A-CGT-----GCC-A-G-----C-A-G---C-CG-C-GGT-AA-----TA-C-G-T-AG-G-----G--G---GC-GA-GC-GT-----TG-T-C-C-G-----G--T-TC-G-G-T-------AA---G-T-C-C-----G-T-C--G--TG--A-AA-TC--C-T-GA-G-G----CT-C-AA-----C-C-T-T-G-G-A-C-G---T-G--C-G--A-T-----G--GA-T-A--C-----T-G-C-CG--G-G-C---T-G-G-A-G-G-A--T-GG---TA-G-A-----G-G-C-G--AG-T----GG-A-ATT---C-C-C-G-GT--GT-A-G-CG-GT--G---A-A-A--TG-C-GC-AG--AT-A-TC--G-G--G-A-G-G-A-AC-A-CC--AG--T-A-GC-GAA-G-G-C-G-----G-C-T-C-G--CTG--G-GC-C-A-----T-T--C-C-T-GA--CG-C-T-G-A-GA--C-G-CG-A-AA-G-C--T-AG--GG-G--AG-C-G-AA-----CA--GG Bacteria(100);Actinobacteria(100);Actinobacteria(100);Rubrobacteridae(100);Rubrobacterales(100);Rubrobacterineae(100);Rubrobacteriaceae(100);Rubrobacter(100);unclassified(100);      |   |   |   |   |   |   |   |   |   |   |   |   |   |   |   |   |   |   |    |   |   |   |   |   |   |   |   |
| Otu1232                                                                                                                                                                                                                                                                                                                                                                                                                                                                                                                                                                                                                                                                                                                                                                                                      | 0 | 0 | 0 | 0 | 0 | 0 | 0 | 0 | 0 | 0 | 0 | 0 | 0 | 0 | 0 | 0 | 0 | 0 | 0  | 0 | 0 | 0 | 0 | 0 | 0 | 0 | 0 |
|                                                                                                                                                                                                                                                                                                                                                                                                                                                                                                                                                                                                                                                                                                                                                                                                              | 0 | 0 | 0 | 0 | 0 | 0 | 0 | 0 | 0 | 0 | 0 | 0 | 0 | 0 | 0 | 0 | 0 | 0 | 0  | 0 | 0 | 0 | 0 | 0 | 0 | 0 | 0 |
|                                                                                                                                                                                                                                                                                                                                                                                                                                                                                                                                                                                                                                                                                                                                                                                                              | 0 | 0 | 0 | 0 | 0 | 0 | 0 | 0 | 0 | 0 | 0 | 0 | 0 | 0 | 0 | 0 | 0 | 0 | 0  | 0 | 0 | 0 | 0 | 0 | 0 | 0 | 0 |
|                                                                                                                                                                                                                                                                                                                                                                                                                                                                                                                                                                                                                                                                                                                                                                                                              | 0 | 0 | 0 | 0 | 0 | 0 | 0 | 0 | 0 | 0 | 0 | 0 | 0 | 0 | 0 | 0 | 0 | 0 | 33 | 0 | 0 | 0 | 0 | 0 | 0 | 0 | 0 |
| M02255_77_000000000-ADUT3_1_1101_13499_14686 T---AC---GA-AG-GGG-----GCT-A-G-----C--G--T--T-GT-T-CGG-AA-----TT-A--C-T-GG-GC-----GT--A---AA-GC-GC-AC-----G-TA-G-G-C-G-----G--A-TT-G-T-T-----AA---G-T-T-A-----G-G-G--G--TG--A-AA-TC--C-C-GG-G-G----CT-C-AA-----C-C-T-C-G-G-A-A-C---T-G--C-C---T-T-----T--GA-T-A--C-----T--G-G--CA--A-T-C---T-T-G-A-G-T--C---C-GG---AA-G-A-----G-G-T-G--AG-T----GG-A-ATT---C-C-T-A-GT--GT-A-G-AG-GT--G---A-A-A--TT-C-GT-AG--AT-A-TT--A-G--G-A-A-G-A-AC-A-CC--AG--T--G--GC-GAA-G-G-C-G-----G-C-T-C-A--CTG--G--TC-C-G-----G-C--A-C-T--GA--CG-C-T-G--A-GG--T-G-CG-A-AA-G-C--G-TG--GG-G--AG-C-A-AA-----CA--GG Bacteria(100);Proteobacteria(100);Alphaproteobacteria(100);Rhizobiales(100);unclassified(100);unclassified(100);unclassified(100);unclassified(100);unclassified(100); |   |   |   |   |   |   |   |   |   |   |   |   |   |   |   |   |   |   |    |   |   |   |   |   |   |   |   |
| Otu1233                                                                                                                                                                                                                                                                                                                                                                                                                                                                                                                                                                                                                                                                                                                                                                                                      | 0 | 0 | 0 | 0 | 0 | 0 | 0 | 0 | 0 | 0 | 0 | 0 | 0 | 0 | 0 | 0 | 0 | 0 | 0  | 0 | 0 | 0 | 0 | 0 | 0 | 0 | 0 |
|                                                                                                                                                                                                                                                                                                                                                                                                                                                                                                                                                                                                                                                                                                                                                                                                              | 0 | 0 | 0 | 0 | 0 | 0 | 0 | 0 | 0 | 0 | 0 | 0 | 0 | 0 | 0 | 0 | 0 | 0 | 0  | 0 | 0 | 0 | 0 | 0 | 0 | 0 | 0 |
|                                                                                                                                                                                                                                                                                                                                                                                                                                                                                                                                                                                                                                                                                                                                                                                                              | 0 | 0 | 0 | 0 | 0 | 0 | 0 | 0 | 0 | 0 | 0 | 0 | 0 | 0 | 0 | 0 | 0 | 0 | 0  | 0 | 0 | 0 | 0 | 0 | 0 | 0 | 0 |
|                                                                                                                                                                                                                                                                                                                                                                                                                                                                                                                                                                                                                                                                                                                                                                                                              | 0 | 0 | 0 | 0 | 0 | 0 | 0 | 0 | 0 | 0 | 0 | 0 | 0 | 0 | 0 | 0 | 0 | 0 | 28 | 0 | 0 | 0 | 0 | 0 | 0 | 0 | 0 |
| M02255_77_000000000-ADUT3_1_1102_18382_19663 T---AC---GT-AG-GTG-----GCG-A-G-----C--G--T--T-AT-C-CGG-AA-----TT-A--C-T-GG-GT-----GT--A---AA-GG-GT-GT-----G-TA-G-G-C-G-----G--G-GA-G-G-C-----AA---G-T-C-A                                                                                                                                                                                                                                                                                                                                                                                                                                                                                                                                                                                                       |   |   |   |   |   |   |   |   |   |   |   |   |   |   |   |   |   |   |    |   |   |   |   |   |   |   |   |



|         |                                                                                                                                                                                                                          |   |   |   |   |   |   |   |   |   |   |   |   |   |   |   |   |    |    |    |   |   |   |   |   |   |   |  |
|---------|--------------------------------------------------------------------------------------------------------------------------------------------------------------------------------------------------------------------------|---|---|---|---|---|---|---|---|---|---|---|---|---|---|---|---|----|----|----|---|---|---|---|---|---|---|--|
| Otu1235 | 0                                                                                                                                                                                                                        | 0 | 0 | 0 | 0 | 0 | 0 | 0 | 0 | 0 | 0 | 0 | 0 | 0 | 0 | 0 | 0 | 0  | 0  | 0  | 0 | 0 | 0 | 0 | 0 | 0 | 0 |  |
|         | 0                                                                                                                                                                                                                        | 0 | 0 | 0 | 0 | 0 | 0 | 0 | 0 | 0 | 0 | 0 | 0 | 0 | 0 | 0 | 0 | 0  | 0  | 0  | 0 | 0 | 0 | 0 | 0 | 0 | 0 |  |
|         | 0                                                                                                                                                                                                                        | 0 | 0 | 0 | 0 | 0 | 0 | 0 | 0 | 0 | 0 | 0 | 0 | 0 | 0 | 0 | 0 | 0  | 0  | 0  | 0 | 0 | 0 | 0 | 0 | 0 | 0 |  |
|         | 0                                                                                                                                                                                                                        | 0 | 0 | 0 | 0 | 0 | 0 | 0 | 0 | 0 | 0 | 0 | 0 | 0 | 0 | 0 | 0 | 0  | 10 | 0  | 0 | 0 | 0 | 0 | 0 |   |   |  |
|         | M02255_77_000000000-ADUT3_1_2106_24191_11147 T---AC---GT-AG-GTG-----GCA-A-G-----C-G--T--T--GT-C-CGG-AT-----TT-A--C-T--GG-GC-----GT--A---AA-----GC-----A-G-G-C-G-----G--A-TA-C-T-T-----                                   |   |   |   |   |   |   |   |   |   |   |   |   |   |   |   |   |    |    |    |   |   |   |   |   |   |   |  |
|         | AA---G-T-A-G-----G-A-A--G--TG--A-AA-GG--T-G-GG-A-G-----CT-C-AA-----C-T-C-C-C-A-C--A-T---T-G--C-T---C-C-----C--TA-T-A--C-----T-G-G--GT--G-T-C---T-T-G-A-G-T--G---G-CG-----GA-G-A-----G-G-G-A--GA-T-----GG--A--ACG---A-C-  |   |   |   |   |   |   |   |   |   |   |   |   |   |   |   |   |    |    |    |   |   |   |   |   |   |   |  |
|         | A-C-GT--GT-A-G-CG-GT--G---A--A---TG-C-GT-TG--AT-A-TG--T-G--T-C-G-G-A-AC-A-CC---AA--T--G--GC-GAA-A--G-C--A-----A-T-C-T-C---CTG--G--AC-G-C-----A-A---A-C-T--GA--CG-C-T-G--A-GA--T-A-CG-A--AA-G-C---C-AA--GG-T--            |   |   |   |   |   |   |   |   |   |   |   |   |   |   |   |   |    |    |    |   |   |   |   |   |   |   |  |
|         | AG-C-A-AA-----CA--GG Bacteria(100);unclassified(100);unclassified(100);unclassified(100);unclassified(100);unclassified(100);unclassified(100);unclassified(100);unclassified(100);                                      |   |   |   |   |   |   |   |   |   |   |   |   |   |   |   |   |    |    |    |   |   |   |   |   |   |   |  |
| Otu1236 | 0                                                                                                                                                                                                                        | 0 | 0 | 0 | 0 | 0 | 0 | 0 | 0 | 0 | 0 | 0 | 0 | 0 | 0 | 0 | 0 | 0  | 0  | 0  | 0 | 0 | 0 | 0 | 0 | 0 | 0 |  |
|         | 0                                                                                                                                                                                                                        | 0 | 0 | 0 | 0 | 0 | 0 | 0 | 0 | 0 | 0 | 0 | 0 | 0 | 0 | 0 | 0 | 0  | 0  | 0  | 0 | 0 | 0 | 0 | 0 | 0 | 0 |  |
|         | 0                                                                                                                                                                                                                        | 0 | 0 | 0 | 0 | 0 | 0 | 0 | 0 | 0 | 0 | 0 | 0 | 0 | 0 | 0 | 0 | 0  | 0  | 0  | 0 | 0 | 0 | 0 | 0 | 0 | 0 |  |
|         | 0                                                                                                                                                                                                                        | 0 | 0 | 0 | 0 | 0 | 0 | 0 | 0 | 0 | 0 | 0 | 0 | 0 | 0 | 0 | 0 | 28 | 0  | 0  | 0 | 0 | 0 | 0 | 0 |   |   |  |
|         | M02255_77_000000000-ADUT3_1_1119_4791_5629 T---AC---GT-AG-GGT-----GCG-A-G-----C-G--T--T--GT-C-CGG-AA-----TT-A--T-T--GG-GC-----GT--A---AA-GG-GC-TT-----G-TA-G-G-C-G-----G--T-TG-G-T-C-----GC-                             |   |   |   |   |   |   |   |   |   |   |   |   |   |   |   |   |    |    |    |   |   |   |   |   |   |   |  |
|         | ---G-T-C-G-----G-A-A--G--TG--A-AA-TC--T-C-AG-G-G-----CT-T-AA-----C-T-C-T-G-A-G--T-C---T-G--C-T---T-C-----T-GA-T-A--C-----G-G-G--CT--G-A-C---T-T-G-A-G-G--G---A-TG---CA-G-G-----G-G-A-G---AA-C-----GG--A--ATT---C-C-T-G-  |   |   |   |   |   |   |   |   |   |   |   |   |   |   |   |   |    |    |    |   |   |   |   |   |   |   |  |
|         | GT--GG-A-G-CG-GT--G---G--A---TG-C-GC-AG--AT-A-TC--A-G--G-A-G-G-A-AC-A-CC---GG--T--G--GC-GAA-G--G-C--G-----G--T-T-C-T---CTG--G--GC-A-T-----T-T---C-C-T--GA--CG-C-T-G--A-GA--A-G-CG-A--AA-G-C---G-TG--GG-G--AG-            |   |   |   |   |   |   |   |   |   |   |   |   |   |   |   |   |    |    |    |   |   |   |   |   |   |   |  |
|         | C-A-AA-----CA--GG Bacteria(100);Actinobacteria(100);Actinobacteria(100);Actinobacteridae(100);Actinomycetales(100);Propionibacterineae(100);Propionibacteriaceae(100);unclassified(100);unclassified(100);               |   |   |   |   |   |   |   |   |   |   |   |   |   |   |   |   |    |    |    |   |   |   |   |   |   |   |  |
| Otu1237 | 0                                                                                                                                                                                                                        | 0 | 0 | 0 | 0 | 0 | 0 | 0 | 0 | 0 | 0 | 0 | 0 | 0 | 0 | 0 | 0 | 0  | 0  | 0  | 0 | 0 | 0 | 0 | 0 | 0 | 0 |  |
|         | 0                                                                                                                                                                                                                        | 0 | 0 | 0 | 0 | 0 | 0 | 0 | 0 | 0 | 0 | 0 | 0 | 0 | 0 | 0 | 0 | 0  | 0  | 0  | 0 | 0 | 0 | 0 | 0 | 0 | 0 |  |
|         | 0                                                                                                                                                                                                                        | 0 | 0 | 0 | 0 | 0 | 0 | 0 | 0 | 0 | 0 | 0 | 0 | 0 | 0 | 0 | 0 | 0  | 0  | 0  | 0 | 0 | 0 | 0 | 0 | 0 | 0 |  |
|         | 0                                                                                                                                                                                                                        | 0 | 0 | 0 | 0 | 0 | 0 | 0 | 0 | 0 | 0 | 0 | 0 | 0 | 0 | 0 | 0 | 0  | 8  | 0  | 0 | 0 | 0 | 0 | 0 |   |   |  |
|         | M02255_77_000000000-ADUT3_1_1106_23506_10260 T---AC---GT-AG-GGG-----GCG-A-G-----C-G--T--T--GT-C-CGG-AT-----TC-A--T-T--GG-GC-----GT--A---AA-GA-GC-TC-----G-TA-G-G-C-G-----G--T-TC-A-G-T-----                              |   |   |   |   |   |   |   |   |   |   |   |   |   |   |   |   |    |    |    |   |   |   |   |   |   |   |  |
|         | -----AA---G-T-C-A-----G-G-T--G--TT--A-AA-GC--T-C-CG-A-G-----CT-C-AA-----CTC-G-G-A-G-A-----G-G-CC-A--T--T-----T-GA-T-A--C-----T-G-C--TG-TG-A-C---T-A-G-A-A-T-C---C-AG---TA-G-G-----G-G-A-G---CG-T-----GG--A--ATT---C-     |   |   |   |   |   |   |   |   |   |   |   |   |   |   |   |   |    |    |    |   |   |   |   |   |   |   |  |
|         | C-T-G-GT--GT-A-G-CG-GT--G---A--A---TG-C-GC-AG--AT-A-TC--A-G--G-A-G-G-A-AC-A-CC---AG--C--G--GC-GAA-G--G-C--G-----G--C-G-C-T---CTG--G--GC-T-G-----G-A---A-T-T--GA--CG-C-T-G--A-GG--A-G-CG-A--AA-G-T---G-TG--GG-            |   |   |   |   |   |   |   |   |   |   |   |   |   |   |   |   |    |    |    |   |   |   |   |   |   |   |  |
|         | T--AG-C-A-AA-----CA--GG Bacteria(100);Actinobacteria(100);Actinobacteria(100);Acidimicrobidae(100);Acidimicrobiales(100);Acidimicrobinaeae(100);unclassified(100);unclassified(100);unclassified(100);                   |   |   |   |   |   |   |   |   |   |   |   |   |   |   |   |   |    |    |    |   |   |   |   |   |   |   |  |
| Otu1238 | 0                                                                                                                                                                                                                        | 0 | 0 | 0 | 0 | 0 | 0 | 0 | 0 | 0 | 0 | 0 | 0 | 0 | 0 | 0 | 0 | 0  | 0  | 0  | 0 | 0 | 0 | 0 | 0 | 0 | 0 |  |
|         | 0                                                                                                                                                                                                                        | 0 | 0 | 0 | 0 | 0 | 0 | 0 | 0 | 0 | 0 | 0 | 0 | 0 | 0 | 0 | 0 | 0  | 0  | 0  | 0 | 0 | 0 | 0 | 0 | 0 | 0 |  |
|         | 0                                                                                                                                                                                                                        | 0 | 0 | 0 | 0 | 0 | 0 | 0 | 0 | 0 | 0 | 0 | 0 | 0 | 0 | 0 | 0 | 0  | 0  | 0  | 0 | 0 | 0 | 0 | 0 | 0 | 0 |  |
|         | 0                                                                                                                                                                                                                        | 0 | 0 | 0 | 0 | 0 | 0 | 0 | 0 | 0 | 0 | 0 | 0 | 0 | 0 | 0 | 0 | 0  | 18 | 0  | 0 | 0 | 0 | 0 | 0 |   |   |  |
|         | M02255_77_000000000-ADUT3_1_1107_18710_13462 T---AC---GT-AG-GGG-----GCG-A-G-----C-G--T--T--GT-C-CGG-AT-----TT-A--C-T--GG-GC-----GT--A---AA-GC-GC-GT-----G-TA-G-G-C-G-----G--C-TG-T-T-T-----                              |   |   |   |   |   |   |   |   |   |   |   |   |   |   |   |   |    |    |    |   |   |   |   |   |   |   |  |
|         | -----AA---G-T-T-G-----G-G-T--G--TG--A-AA-GC--C-C-GG-G-G-----CT-C-AA-----C-C-C-C-G-G-G--A-C---G-C--C-G---C--C-----C-AA-G-A--C-----T-G-G--AT--G-G-C---T-T-G-A-G-G--A---C-GG---AA-G-A-----G-G-G-G---CG-T-----GG--A--ATT---  |   |   |   |   |   |   |   |   |   |   |   |   |   |   |   |   |    |    |    |   |   |   |   |   |   |   |  |
|         | C-C-T-G-GT--GT-A-G-CG-GT--G---A--A---TG-C-GT-AG--AG-A-TC--A-G--G-A-G-G-A-AC-A-CC---CG--T--G--GC-GAA-G--G-C--G-----G--C-G-C-C---CTG--G--TC-C-G-----T-T---T-C-T--GA--CG-C-T-G--A-GA--C-G-CG-A--AA-G-C---G-CG--             |   |   |   |   |   |   |   |   |   |   |   |   |   |   |   |   |    |    |    |   |   |   |   |   |   |   |  |
|         | GG-G--AG-C-G-AA-----CG--GG Bacteria(100);unclassified(100);unclassified(100);unclassified(100);unclassified(100);unclassified(100);unclassified(100);unclassified(100);unclassified(100);                                |   |   |   |   |   |   |   |   |   |   |   |   |   |   |   |   |    |    |    |   |   |   |   |   |   |   |  |
| Otu1239 | 0                                                                                                                                                                                                                        | 0 | 0 | 0 | 0 | 0 | 0 | 0 | 0 | 0 | 0 | 0 | 0 | 0 | 0 | 0 | 0 | 0  | 0  | 0  | 0 | 0 | 0 | 0 | 0 | 0 | 0 |  |
|         | 0                                                                                                                                                                                                                        | 0 | 0 | 0 | 0 | 0 | 0 | 0 | 0 | 0 | 0 | 0 | 0 | 0 | 0 | 0 | 0 | 0  | 0  | 0  | 0 | 0 | 0 | 0 | 0 | 0 | 0 |  |
|         | 0                                                                                                                                                                                                                        | 0 | 0 | 0 | 0 | 0 | 0 | 0 | 0 | 0 | 0 | 0 | 0 | 0 | 0 | 0 | 0 | 0  | 0  | 0  | 0 | 0 | 0 | 0 | 0 | 0 | 0 |  |
|         | 0                                                                                                                                                                                                                        | 0 | 0 | 0 | 0 | 0 | 0 | 0 | 0 | 0 | 0 | 0 | 0 | 0 | 0 | 0 | 0 | 0  | 0  | 16 | 0 | 0 | 0 | 0 | 0 |   |   |  |
|         | M02255_76_000000000-ADUNE_1_1115_15743_12245 .....AC---T-AC-GT-----GCC-A-G-----C-A--G---C--CG-C-GGT-AA-----TA-C--G-T--AG-GT-----GG--C---AA-GC-G--TT-----G-TC-C-G---G-----A--T-CT-C-T-T-----                              |   |   |   |   |   |   |   |   |   |   |   |   |   |   |   |   |    |    |    |   |   |   |   |   |   |   |  |
|         | AA---G-T-C-T-----G-A-T--G--TG--A-AA-TC--T-T-GC-G-G-----CT-T-AA-----C-C-G-T-A-A-G--T-----G-GT-C-A--T--T-----G--GA-A-A--C-----T-G-G--GA--G-G-C---T-T-G-A-G-T--G---C-AG---AA-G-A-----G-G-A-G---AG-T-----GG--A--ATT---C-C-A- |   |   |   |   |   |   |   |   |   |   |   |   |   |   |   |   |    |    |    |   |   |   |   |   |   |   |  |
|         | T-GT--GT-A-G-CG-GT--G---A--A---TG-C-GT-AG--AG-A-TA--T-G--G-A-G-G-A-AC-A-CC---AG--T--G--GC-GAA-G--G-C--G-----A--C-T-C-T---CTG--G--TC-T-G-----T-A---A-C-T--GA--CG-C-T-G--A-GG--A-G-CG-A--AA-G-C---G-TG--GG-G--             |   |   |   |   |   |   |   |   |   |   |   |   |   |   |   |   |    |    |    |   |   |   |   |   |   |   |  |
|         | AG-C-G-AA-----CA--GG Bacteria(100);Firmicutes(100);Bacilli(100);unclassified(100);unclassified(100);unclassified(100);unclassified(100);unclassified(100);unclassified(100);                                             |   |   |   |   |   |   |   |   |   |   |   |   |   |   |   |   |    |    |    |   |   |   |   |   |   |   |  |



|                                                                                                                                                                                                                        |   |   |   |   |   |   |   |   |   |   |   |   |   |   |   |   |   |    |   |   |    |   |   |   |   |   |   |
|------------------------------------------------------------------------------------------------------------------------------------------------------------------------------------------------------------------------|---|---|---|---|---|---|---|---|---|---|---|---|---|---|---|---|---|----|---|---|----|---|---|---|---|---|---|
| Otu1240                                                                                                                                                                                                                | 0 | 0 | 0 | 0 | 0 | 0 | 0 | 0 | 0 | 0 | 0 | 0 | 0 | 0 | 0 | 0 | 0 | 0  | 0 | 0 | 0  | 0 | 0 | 0 | 0 | 0 | 0 |
|                                                                                                                                                                                                                        | 0 | 0 | 0 | 0 | 0 | 0 | 0 | 0 | 0 | 0 | 0 | 0 | 0 | 0 | 0 | 0 | 0 | 0  | 0 | 0 | 0  | 0 | 0 | 0 | 0 | 0 | 0 |
|                                                                                                                                                                                                                        | 0 | 0 | 0 | 0 | 0 | 0 | 0 | 0 | 0 | 0 | 0 | 0 | 0 | 0 | 0 | 0 | 0 | 0  | 0 | 0 | 0  | 0 | 0 | 0 | 0 | 0 | 0 |
|                                                                                                                                                                                                                        | 0 | 0 | 0 | 0 | 0 | 0 | 0 | 0 | 0 | 0 | 0 | 0 | 0 | 0 | 0 | 0 | 0 | 0  | 0 | 0 | 14 | 0 | 0 | 0 | 0 | 0 |   |
| M02255_76_000000000-ADUNE_1_1117_13149_10690 C---AC---GT-AG-GGG-----GCG-A-G-----C-G-T---T--GT-C-CGG-AT-----TT-A--T-T--GG-GC-----GT-A----AA-GA-GC-TC-----A-G-T-A-G-----G---TC-G-G-----                                  |   |   |   |   |   |   |   |   |   |   |   |   |   |   |   |   |   |    |   |   |    |   |   |   |   |   |   |
| ---GT---G-T-G-A-----A-A-T--T--TC---AG-GG-C-T-CA-----AC-----C-C-T-G-A-A-A-----C-G-CC-A--C-C-----C--GA-T-A--C-----T--G-C-TG-TG-G-C---T-A-G-A-G-T-C--C-GG---TA-G-G-----G-G-A-G--CG-T-----GG--A--ATT---C-C-T-G-            |   |   |   |   |   |   |   |   |   |   |   |   |   |   |   |   |   |    |   |   |    |   |   |   |   |   |   |
| GT--GT-A-G-CG-GT--G---A--A-A--TG-C-GC-AG--AT-A-TC--A-G--G-A-G-G-A-AC-A-CC---AG--C--G--GC-GAA-G--G-C-G-----G--C-G-C-T---CTG--G--GC-C-G-----G-A--A-C-T--GA--CG-C-T-G--A-GG--A-G-CG-A--AA-G-C---A-TG--GG-T--AG-           |   |   |   |   |   |   |   |   |   |   |   |   |   |   |   |   |   |    |   |   |    |   |   |   |   |   |   |
| C-G-AA-----CA--GG Bacteria(100);Actinobacteria(100);Actinobacteria(100);Acidimicrobidae(100);Acidimicrobiales(100);Acidimicrobineae(100);unclassified(100);unclassified(100);unclassified(100);                        |   |   |   |   |   |   |   |   |   |   |   |   |   |   |   |   |   |    |   |   |    |   |   |   |   |   |   |
| Otu1241                                                                                                                                                                                                                | 0 | 0 | 0 | 0 | 0 | 0 | 0 | 0 | 0 | 0 | 0 | 0 | 0 | 0 | 0 | 0 | 0 | 0  | 0 | 0 | 0  | 0 | 0 | 0 | 0 | 0 | 0 |
|                                                                                                                                                                                                                        | 0 | 0 | 0 | 0 | 0 | 0 | 0 | 0 | 0 | 0 | 0 | 0 | 0 | 0 | 0 | 0 | 0 | 0  | 0 | 0 | 0  | 0 | 0 | 0 | 0 | 0 | 0 |
|                                                                                                                                                                                                                        | 0 | 0 | 0 | 0 | 0 | 0 | 0 | 0 | 0 | 0 | 0 | 0 | 0 | 0 | 0 | 0 | 0 | 0  | 0 | 0 | 0  | 0 | 0 | 0 | 0 | 0 | 0 |
|                                                                                                                                                                                                                        | 0 | 0 | 0 | 0 | 0 | 0 | 0 | 0 | 0 | 0 | 0 | 0 | 0 | 0 | 0 | 0 | 0 | 0  | 0 | 0 | 74 | 0 | 0 | 0 | 0 | 0 |   |
| M02255_76_000000000-ADUNE_1_2105_8559_11800 T---AC---GT-AA-GGA-----CCA-A-G-----C-G-T---T--GT-C-CGG-AA-----TC-A--T-T--GG-GC-----GT-A----AA-GG-GT-AC-----G-TA-G-G-C-T-----G--C-CT-A-G-T-----AA-                          |   |   |   |   |   |   |   |   |   |   |   |   |   |   |   |   |   |    |   |   |    |   |   |   |   |   |   |
| ---G-T-T-A-----G-A-A-G--TG--A-AA-GC--A-T-AT-A-G----CT-T-AA-----C-T-A-T-A-T-A-A-----A-G-C-T---T-T-----T--AA-A-A--C-----T--G-C-TA-G-G-C---T-T-G-A-G-A-G--A-TG---AA-A-G-----G-G-A-A--AG-T-----GG--A--ATT---C-C-T-A-       |   |   |   |   |   |   |   |   |   |   |   |   |   |   |   |   |   |    |   |   |    |   |   |   |   |   |   |
| GT--GT-A-G-CG-GT--G---A--A-A--TG-C-GC-AG--AT-A-TT--A-G--G-A-A-G-A-AT-A-CC---AG--T--G--GC-GAA-G--G-C-G-----A--C-T-T-T---CTG--G--TC-A-T-----C-C---T-C-T--GA--CG-C-T-G--A-GG--T-A-CG-A--AA-G-C---G-TG--GG-T--AG-C-        |   |   |   |   |   |   |   |   |   |   |   |   |   |   |   |   |   |    |   |   |    |   |   |   |   |   |   |
| A-AA-----CA--GG Bacteria(100);Firmicutes(100);Clostridia(100);Clostridiales(100);Family_XI_Incertae_Sedis(100);unclassified(100);unclassified(100);unclassified(100);unclassified(100);                                |   |   |   |   |   |   |   |   |   |   |   |   |   |   |   |   |   |    |   |   |    |   |   |   |   |   |   |
| Otu1242                                                                                                                                                                                                                | 0 | 0 | 0 | 0 | 0 | 0 | 0 | 0 | 0 | 0 | 0 | 0 | 0 | 0 | 0 | 0 | 0 | 0  | 0 | 0 | 0  | 0 | 0 | 0 | 0 | 0 | 0 |
|                                                                                                                                                                                                                        | 0 | 0 | 0 | 0 | 0 | 0 | 0 | 0 | 0 | 0 | 0 | 0 | 0 | 0 | 0 | 0 | 0 | 0  | 0 | 0 | 0  | 0 | 0 | 0 | 0 | 0 | 0 |
|                                                                                                                                                                                                                        | 0 | 0 | 0 | 0 | 0 | 0 | 0 | 0 | 0 | 0 | 0 | 0 | 0 | 0 | 0 | 0 | 0 | 0  | 0 | 0 | 0  | 0 | 0 | 0 | 0 | 0 | 0 |
|                                                                                                                                                                                                                        | 0 | 0 | 0 | 0 | 0 | 0 | 0 | 0 | 0 | 0 | 0 | 0 | 0 | 0 | 0 | 0 | 0 | 0  | 0 | 0 | 56 | 0 | 0 | 0 | 0 | 0 |   |
| M02255_77_000000000-ADUT3_1_1103_4972_7951 T---AC---GT-AG-GGG-----GCG-A-G-----C-G-T---T--GT-C-CGG-AC-----TT-A--T-T--GG-GC-----GT-A----AA-GA-GC-AT-----G-TA-G-G-C-G-----G--T-CC-T-G-T-----AA-                           |   |   |   |   |   |   |   |   |   |   |   |   |   |   |   |   |   |    |   |   |    |   |   |   |   |   |   |
| ---G-T-C-A-----G-A-T--G--TG--A-AA-TC--T-C-CG-G-G----CT-C-AA-----C-C-C-G-G-A-A-A-C---T-G--C-A--T--C-----T--GA-T-A--C-----T--G-C-AG--G-A-C---T-T-G-A-G-G-T--A-GG---TA-G-A-----G-G-A-G--AG-T-----GG--A--ATT---T-C-C-G-    |   |   |   |   |   |   |   |   |   |   |   |   |   |   |   |   |   |    |   |   |    |   |   |   |   |   |   |
| GT--GT-A-G-CG-GT--G---G--A-A--TG-C-GC-AG--AT-A-TC--G-G--A-A-G-G-A-AC-A-CC---GA--T--G--GC-GAA-G--G-C-A-----G--C-T-C-T---CTG--G--GC-C-T-----C-A---C-C-T--GA--CG-C-T-G--A-GA--T-G-CG-A--AA-G-C---G-TG--GG-T--AG-C-        |   |   |   |   |   |   |   |   |   |   |   |   |   |   |   |   |   |    |   |   |    |   |   |   |   |   |   |
| A-AA-----CA--GG Bacteria(100);unclassified(100);unclassified(100);unclassified(100);unclassified(100);unclassified(100);unclassified(100);unclassified(100);unclassified(100);                                         |   |   |   |   |   |   |   |   |   |   |   |   |   |   |   |   |   |    |   |   |    |   |   |   |   |   |   |
| Otu1243                                                                                                                                                                                                                | 0 | 0 | 0 | 0 | 0 | 0 | 0 | 0 | 0 | 0 | 0 | 0 | 0 | 0 | 0 | 0 | 0 | 0  | 0 | 0 | 0  | 0 | 0 | 0 | 0 | 0 | 0 |
|                                                                                                                                                                                                                        | 0 | 0 | 0 | 0 | 0 | 0 | 0 | 0 | 0 | 0 | 0 | 0 | 0 | 0 | 0 | 0 | 0 | 0  | 0 | 0 | 0  | 0 | 0 | 0 | 0 | 0 | 0 |
|                                                                                                                                                                                                                        | 0 | 0 | 0 | 0 | 0 | 0 | 0 | 0 | 0 | 0 | 0 | 0 | 0 | 0 | 0 | 0 | 0 | 0  | 0 | 0 | 0  | 0 | 0 | 0 | 0 | 0 | 0 |
|                                                                                                                                                                                                                        | 0 | 0 | 0 | 0 | 0 | 0 | 0 | 0 | 0 | 0 | 0 | 0 | 0 | 0 | 0 | 0 | 0 | 0  | 0 | 0 | 95 | 0 | 0 | 0 | 0 | 0 |   |
| M02255_77_000000000-ADUT3_1_1105_27494_9381 T---AC---GG-AG-GGG-----GCT-A-G-----C-G-T---T--GT-T-CGG-AA-----TT-A--C-T--GG-GC-----GT-A----AA-GC-GC-AC-----G-TA-G-G-C-G-----G--A-CC-T-G-C-----                             |   |   |   |   |   |   |   |   |   |   |   |   |   |   |   |   |   |    |   |   |    |   |   |   |   |   |   |
| AA---G-T-T-G-----G-G-G--G--TG--A-AA-TC--C-C-GG-G-G----CT-C-AA-----C-C-C-C-G-G-A-A-A-C---T-G--C-C---T--C-----C--AG-G-A--C-----T--G-C-CG--G-T-C---T-G-G-A-G-T--T---C-GG---GA-G-A-----G-G-C-G--AG-T-----GG--A--ATT---C-C- |   |   |   |   |   |   |   |   |   |   |   |   |   |   |   |   |   |    |   |   |    |   |   |   |   |   |   |
| G-A-GT--GT-A-G-AG-GT--G---A--A-A--TT-C-GT-AG--AT-A-TT--C-G--G-A-G-G-A-AC-A-CC---AG--T--G--GC-GAA-G--G-C-G-----G--C-T-C-G---CTG--G--CC-C-G-----A-T---A-C-T--GA--CG-C-T-G--A-GG--T-G-CG-A--AA-G-C---G-TG--GG-G--         |   |   |   |   |   |   |   |   |   |   |   |   |   |   |   |   |   |    |   |   |    |   |   |   |   |   |   |
| AG-C-A-AA-----CA--GG Bacteria(100);Proteobacteria(100);Alphaproteobacteria(100);unclassified(100);unclassified(100);unclassified(100);unclassified(100);unclassified(100);unclassified(100);                           |   |   |   |   |   |   |   |   |   |   |   |   |   |   |   |   |   |    |   |   |    |   |   |   |   |   |   |
| Otu1244                                                                                                                                                                                                                | 0 | 0 | 0 | 0 | 0 | 0 | 0 | 0 | 0 | 0 | 0 | 0 | 0 | 0 | 0 | 0 | 0 | 0  | 0 | 0 | 0  | 0 | 0 | 0 | 0 | 0 | 0 |
|                                                                                                                                                                                                                        | 0 | 0 | 0 | 0 | 0 | 0 | 0 | 0 | 0 | 0 | 0 | 0 | 0 | 0 | 0 | 0 | 0 | 0  | 0 | 0 | 0  | 0 | 0 | 0 | 0 | 0 | 0 |
|                                                                                                                                                                                                                        | 0 | 0 | 0 | 0 | 0 | 0 | 0 | 0 | 0 | 0 | 0 | 0 | 0 | 0 | 0 | 0 | 0 | 0  | 0 | 0 | 0  | 0 | 0 | 0 | 0 | 0 | 0 |
|                                                                                                                                                                                                                        | 0 | 0 | 0 | 0 | 0 | 0 | 0 | 0 | 0 | 0 | 0 | 0 | 0 | 0 | 0 | 0 | 0 | 59 | 0 | 0 | 0  | 0 | 0 | 0 | 0 | 0 |   |
| M02255_77_000000000-ADUT3_1_1101_11044_8253 T---AC---GA-AG-GGA-----GCT-A-G-----C-G-T---T--GT-T-CGG-AA-----TT-A--C-T--GG-GC-----GT-A----AA-GG-GC-GC-----G-TA-G-G-C-G-----G--T-TT-G-A-C-----                             |   |   |   |   |   |   |   |   |   |   |   |   |   |   |   |   |   |    |   |   |    |   |   |   |   |   |   |
| AA---G-T-T-G-----G-A-T--G--TG--A-AA-GC--C-C-AG-G-G----CT-C-AA-----C-C-C-T-G-G-A-A-T---A-G--C-A--T--T-----C--AA-G-A--C-----T--G-T--TT--T-A-C---T-T-G-A-A-T--T---C-GG---TA-G-A-----G-G-T-G--AG-T-----GG--A--ATT---C-C-C- |   |   |   |   |   |   |   |   |   |   |   |   |   |   |   |   |   |    |   |   |    |   |   |   |   |   |   |
| A-GT--GT-A-G-AG-GT--G---A--A-A--TT-C-GT-AG--AT-A-TT--G-G--G-A-A-G-A-AC-A-CC---AG--T--G--GC-GAA-G--G-C-G-----G--C-T-C-A---CTG--G--AC-C-G-----A-C---A-T-T--GA--CG-C-T-G--A-GG--C-G-CG-A--AA-G-C---G-TG--GG-G--           |   |   |   |   |   |   |   |   |   |   |   |   |   |   |   |   |   |    |   |   |    |   |   |   |   |   |   |
| AT-C-A-AA-----CA--GG Bacteria(100);Proteobacteria(100);Alphaproteobacteria(100);unclassified(100);unclassified(100);unclassified(100);unclassified(100);unclassified(100);unclassified(100);                           |   |   |   |   |   |   |   |   |   |   |   |   |   |   |   |   |   |    |   |   |    |   |   |   |   |   |   |



[illegible]



Otu1250 0 0 0 0 0 0 0 0 0 0 0 0 0 0 0 0 0 0 0 0 0 0 0 0 0 0 0 0  
0 0 0 0 0 0 0 0 0 0 0 0 0 0 0 0 0 0 0 0 0 0 0 0 0 0 0 0  
0 0 0 0 0 0 0 0 0 0 0 0 0 0 0 0 0 0 0 0 0 0 0 0 0 0 0 0  
0 0 0 0 0 0 0 0 0 0 0 0 0 0 0 0 38 12 0 0 0 0 0 0 0 0  
M02255\_77\_000000000-ADUT3\_1\_1106\_21788\_20393 T---AC--GA-AG-GGG-----GCT-A-G-----C-G--T--T--GT-T-CGG-AA-----TT-A--C-T--GG-GC-----GT-A----AA-GG-GC-GC-----G-TA-G-G-C-G-----G--C-GC-A-T-C-----  
-----AA---G-T-C-A-----G-G-C--G-TG--A-AA-GC--C-C-CG-G-G-----CT-T-AA-----C-C-T-G-G-G-A--A-C---T-G--C-G--T--T-----T-GA-G-A--C-----T-G-G-TG--T-G-C---T-A-G-A-G-T--T---C-GG----GA-G-A-----G-G-T-G---AG-T-----GG--A--ATT-----  
C-C-C-A-GT--GT-A-G-AG-GT--G---A--A---TT-C-GT-AG--AT-A-TT--G-G--G-A-A-G-A-AC-A-CC---GG--T--G--GC-GAA-G--G-C--G-----G--C-T-C-A---CTG--G--AC-C-G-----A-C---A-C-T--GA--CG-C-T-G--A-GG--C-G-CG-A--AA-G-C---G-TG--  
GG-G--AG-C-A-AA-----CA--GG Bacteria(100);Proteobacteria(100);Alphaproteobacteria(100);Rhodospirillales(100);unclassified(100);unclassified(100);unclassified(100);unclassified(100);unclassified(100);

Otu1251 0 0 0 0 0 0 0 0 0 0 0 0 0 0 0 0 0 0 0 0 0 0 0 0 0 0 0 0  
0 0 0 0 0 0 0 0 0 0 0 0 0 0 0 0 0 0 0 0 0 0 0 0 0 0 0 0  
0 0 0 0 0 0 0 0 0 0 0 0 0 0 0 0 0 0 0 0 0 0 0 0 0 0 0 0  
0 0 0 0 0 0 0 0 0 0 0 0 0 0 0 0 3 0 0 25 0 0 0 0 0 0  
M02255\_77\_000000000-ADUT3\_1\_1109\_3797\_20219 T---AC---GT-AG-GGT-----GCA-A-G-----C-G--T--T--GT-C-CGG-AA-----TT-A--T-T--GG-GC-----GT-A----AA-GA-GC-TC-----G-TA-G-G-C-G-----G--T-TC-G-T-C-----GC-  
---G-T-C-G-----G-C-T--G--TG--A-AA-TC--C-C-GA-G-G-----CT-C-AA-----C-C-T-C-G-G-G--T-C---T-G--C-A--G--T-----C--GA-T-A--C-----G--G-G--CG--G-A-C---T-G-G-A-G-T--T---C-GG----CA-G-G-----G-G-A-G---AC-T-----GG--A--ATT---C-C-T-G-  
GT--GT-A-G-CG-GT--G---A--A---TG-C-GC-AG--AT-A-TC--A-G--G-A-G-G-A-AC-A-CC---GG--T--G--GC-GAA-G--G-C--G-----G--G-T-C-T---CTG--G--GC-C-G-----A-T---A-C-T--GA--CG-C-T-G--A-GG--A-G-CG-A--AA-G-C---G-TG--GG-G--AG-  
C-G-AA-----CA--GG Bacteria(100);Actinobacteria(100);Actinobacteria(100);Actinobacteridae(100);Actinomycetales(100);unclassified(100);unclassified(100);unclassified(100);unclassified(100);

Otu1252 0 0 0 0 0 0 0 0 0 0 0 0 0 0 0 0 0 0 0 0 0 0 0 0 0 0 0 0  
0 0 0 0 0 0 0 0 0 0 0 0 0 0 0 0 0 0 0 0 0 0 0 0 0 0 0 0  
0 0 0 0 0 0 0 0 0 0 0 0 0 0 0 0 0 0 0 0 0 0 0 0 0 0 0 0  
0 0 0 0 0 0 0 0 0 0 0 0 0 0 0 0 26 0 0 0 0 0 0 0 0 0  
M02255\_77\_000000000-ADUT3\_1\_2104\_11921\_9338 C---TC--CG-TG-CCA-----GCAGCCG-----CG-G--T--A--AT-A-CGG-AG-----GG-T--G-C--AA-GC-----GT--T-----AT-CC-GG-AT-----T-TA-G-G-T-G-----G--G-TT-G-G-T-----  
AA---G-T-C-A-----G-T-G--G--TG--A-AA-TC--T-C-CG-A-G-----CT-T-AA-----C-T-C-G-G-A-A--A-C---T-G--C-C--A--T-----T-GA-T-A--C-----T-A-T--CA-A-T-C---T-T-G-A-A-T--A--T-CC-----TG-G-A-----G-G-T-G---AG-C-----GG--A--ATA---T-G-T-C-  
AT--GT-A-G-CG-GT--G---A--A---TG-C-TT-AG--AT-A-TG--A-C--A-T-A-G-A-AC-A-CC---AA--T--T--GC-GAA-G--G-C--A-----G--C-T-C-A---CTA--C--GG-G-G-----T-C---A-T-T--GA--CA-C-T-G--A-GG--C-A-CG-A--AA-G-C---G-TG--GG-G--AT-C-  
A-AA-----CA--GG Bacteria(100);Bacteroidetes(100);Sphingobacteria(100);Sphingobacteriales(100);Chitinophagaceae(100);unclassified(100);unclassified(100);unclassified(100);unclassified(100);

Otu1253 0 0 0 0 0 0 0 0 0 0 0 0 0 0 0 0 0 0 0 0 0 0 0 0 0 0 0 0  
0 0 0 0 0 0 0 0 0 0 0 0 0 0 0 0 0 0 0 0 0 0 0 0 0 0 0 0  
0 0 0 0 0 0 0 0 0 0 0 0 0 0 0 0 0 0 0 0 0 0 0 0 0 0 0 0  
0 0 0 0 0 0 0 0 0 0 0 0 0 0 0 0 0 0 0 0 32 0 0 0 0 0  
M02255\_77\_000000000-ADUT3\_1\_1105\_20549\_15513 C---AC---GT-AG-GGG-----GCG-A-G-----C-G--T--T--GT-C-CGG-AT-----TT-A--T-T--GG-GC-----GT-A----AA-GA-GC-TC-----G-TA-G-G-C-G-----G--C-TC-A-G-T-----  
-----AA---G-T-C-G-----G-G-T--G--TG--A-AA-TT--T-C-AG-G-G-----CT-C-AAC-----C-C-T-G-A-A-A-----C-G-CC-A--C--C-----C--GA-T-A--C-----T--G-C--TG-TG-G-C---T-A-G-A-G-T--C---C-GG----TA-G-G-----G-G-A-G---CG-T-----GG--A--ATT---  
C-C-T-G-GT--GT-A-G-CG-GT--G---A--A---TG-C-GC-AG--AT-A-TC--A-G--G-A-G-G-A-AC-A-CC---AG--C--G--GC-GAA-G--G-C--G-----G--C-G-C-T---CTG--G--GC-C-G-----G-A---A-C-T--GA--CG-C-T-G--A-GG--A-G-CG-A--AA-G-C---A-TG--  
GG-T--AG-C-G-AA-----CA--GG Bacteria(100);Actinobacteria(100);Actinobacteria(100);Acidimicrobidae(100);Acidimicrobiales(100);Acidimicrobineae(100);unclassified(100);unclassified(100);unclassified(100);

Otu1254 0 0 0 0 0 0 0 0 0 0 0 0 0 0 0 0 0 0 0 0 0 0 0 0 0 0 0 0  
0 0 0 0 0 0 0 0 0 0 0 0 0 0 0 0 0 0 0 0 0 0 0 0 0 0 0 0  
0 0 0 0 0 0 0 0 0 0 0 0 0 0 0 0 0 0 0 0 0 0 0 0 0 0 0 0  
0 0 0 0 0 0 0 0 0 0 0 0 0 0 0 0 22 0 0 0 0 0 0 0 0 0  
M02255\_77\_000000000-ADUT3\_1\_1101\_13212\_24079 T---AC---GT-AG-GTG-----GCA-A-G-----C-G--T--T--GT-C-CGG-AT-----TT-A--T-T--GG-GC-----GT-A----AA-GC-AT-GC-----G-TA-G-G-C-G-----G--A-TA-T-T-T-----  
-----AA---G-T-G-G-----G-A-T--G--TG--A-AA-TC--C-C-GG-G-G-----CT-T-AA-----C-C-C-C-G-G-T--G-C---T-G--C-A--T--T-----T--CA-A-A--C-----T--G-G--AT--A-T-C---T-A-G-A-G-T--G---C-AG----GA-G-A-----G-G-A-A--AG-C-----GG--A--ATT---C-  
C-T-A-GT--GT-A-G-CG-GT--G---A--A---TG-C-GT-AG--AT-A-TT--A-G--G-A-A-G-A-AC-A-CC---AG--T--G--GC-GAA-G--G-C--G-----G--C-T-T-T---CTG--G--AC-T-G-----T-A---A-C-T--GA--CG-C-T-G--A-GG--C-A-TG-A--AA-G-C---G-TG--GG-T-  
-AG-C-A-AA-----CA--GG Bacteria(100);Firmicutes(100);Clostridia(100);Clostridiales(100);Clostridiaceae(100);Clostridium(100);unclassified(100);unclassified(100);unclassified(100);



|                                                                                                                                                                                                                          |   |   |   |   |   |   |   |   |   |   |   |   |   |   |   |   |   |    |   |   |   |   |   |   |   |   |   |
|--------------------------------------------------------------------------------------------------------------------------------------------------------------------------------------------------------------------------|---|---|---|---|---|---|---|---|---|---|---|---|---|---|---|---|---|----|---|---|---|---|---|---|---|---|---|
| Otu1255                                                                                                                                                                                                                  | 0 | 0 | 0 | 0 | 0 | 0 | 0 | 0 | 0 | 0 | 0 | 0 | 0 | 0 | 0 | 0 | 0 | 0  | 0 | 0 | 0 | 0 | 0 | 0 | 0 | 0 | 0 |
|                                                                                                                                                                                                                          | 0 | 0 | 0 | 0 | 0 | 0 | 0 | 0 | 0 | 0 | 0 | 0 | 0 | 0 | 0 | 0 | 0 | 0  | 0 | 0 | 0 | 0 | 0 | 0 | 0 | 0 | 0 |
|                                                                                                                                                                                                                          | 0 | 0 | 0 | 0 | 0 | 0 | 0 | 0 | 0 | 0 | 0 | 0 | 0 | 0 | 0 | 0 | 0 | 0  | 0 | 0 | 0 | 0 | 0 | 0 | 0 | 0 | 0 |
|                                                                                                                                                                                                                          | 0 | 0 | 0 | 0 | 0 | 0 | 0 | 0 | 0 | 0 | 0 | 0 | 0 | 0 | 0 | 0 | 0 | 16 | 0 | 0 | 0 | 0 | 0 | 0 | 0 |   |   |
| M02255_77_000000000-ADUT3_1_1105_11827_14973 T---AC---AT-AG-GGT-----GCA-A-G-----C-G-T---T-GT-C-CGG-AA-----TT-A-T-T-GG-GC-----GT-A---AA-GA-GC-TC-----G-TA-G-G-T-G-----G-T-TC-G-T-C-----                                   |   |   |   |   |   |   |   |   |   |   |   |   |   |   |   |   |   |    |   |   |   |   |   |   |   |   |   |
| ----AC---G-T-C-G-----G-A-T--G--TG--A-AA-CT--C-T-GG-G-G----CT-T-AA-----C-C-C-C-A-G-A-C-C---T-G-C-A---T-T-----C-GA-T-A---C-----G-G-G--CG--A-G-C---T-T-G-A-G-T-A---T-GG-----TA-G-G-----G-G-A-G---TC-T-----GG--A--ATT---C-   |   |   |   |   |   |   |   |   |   |   |   |   |   |   |   |   |   |    |   |   |   |   |   |   |   |   |   |
| C-T-G-GT--GT-A-G-CG-GT--G---G--A-A---TG-C-GC-AG--AT-A-TC--A-G--G-A-G-G-A-AC-A-CC---AA--T--G--GC-GAA-G--G-C--A-----G-G-A-C-T---CTG--G--GC-C-A-----T-T---A-C-T--GA--CA-C-T-G--A-GG--A-G-CG-A--AA-G-C---G-TG--GG-           |   |   |   |   |   |   |   |   |   |   |   |   |   |   |   |   |   |    |   |   |   |   |   |   |   |   |   |
| G--AG-C-G-AA-----CA--GG Bacteria(100);Actinobacteria(100);Actinobacteria(100);Actinobacteridae(100);Actinomycetales(100);Frankineae(100);Sporichthyaceae(100);hgcl_clade(100);unclassified(100);                         |   |   |   |   |   |   |   |   |   |   |   |   |   |   |   |   |   |    |   |   |   |   |   |   |   |   |   |
| Otu1256                                                                                                                                                                                                                  | 0 | 0 | 0 | 0 | 0 | 0 | 0 | 0 | 0 | 0 | 0 | 0 | 0 | 0 | 0 | 0 | 0 | 0  | 0 | 0 | 0 | 0 | 0 | 0 | 0 | 0 | 0 |
|                                                                                                                                                                                                                          | 0 | 0 | 0 | 0 | 0 | 0 | 0 | 0 | 0 | 0 | 0 | 0 | 0 | 0 | 0 | 0 | 0 | 0  | 0 | 0 | 0 | 0 | 0 | 0 | 0 | 0 | 0 |
|                                                                                                                                                                                                                          | 0 | 0 | 0 | 0 | 0 | 0 | 0 | 0 | 0 | 0 | 0 | 0 | 0 | 0 | 0 | 0 | 0 | 0  | 0 | 0 | 0 | 0 | 0 | 0 | 0 | 0 | 0 |
|                                                                                                                                                                                                                          | 0 | 0 | 0 | 0 | 0 | 0 | 0 | 0 | 0 | 0 | 0 | 0 | 0 | 0 | 0 | 0 | 0 | 20 | 0 | 0 | 0 | 0 | 0 | 0 | 0 | 0 | 0 |
| M02255_77_000000000-ADUT3_1_1106_16150_9689 G---AC---GT-AG-GAT-----GCG-A-G-----C-G-T---T-GT-C-CGG-AT-----TT-A-T-T-GG-GC-----GT-A---AA-GA-GT-TC-----G-TA-G-G-T-G-----G-C-TT-G-T-C-----AA--                                |   |   |   |   |   |   |   |   |   |   |   |   |   |   |   |   |   |    |   |   |   |   |   |   |   |   |   |
| --G-T-T-T-----G-A-T--G--TT--A-AA-GA--T-C-GG-G-G----CT-C-AA-----C-C-C-T-G-G-G--A-C---T-G-C-A---T-T-----G-AA-T-A---C-----T-G-G--CA--G-G-C---T-T-G-A-G-T-G---T-GG-----TA-G-A-----G-G-C-T--AG-T-----GG--A--ATT---C-C-C-A-    |   |   |   |   |   |   |   |   |   |   |   |   |   |   |   |   |   |    |   |   |   |   |   |   |   |   |   |
| GT--GT-A-G-CG-GT--G---A-A-A---TG-C-GT-AG--AT-A-TT--G-G--G-A-A-G-A-AC-A-CC---GG--T--G--GC-GTA-G--G-C--G-----A-C-T-A-G---CTG--G--GC-C-A-----T-A---A-C-T--GA--CA-C-T-G--A-GG--A-A-CG-A--AA-G-C---C-AG--GG-T--AG-            |   |   |   |   |   |   |   |   |   |   |   |   |   |   |   |   |   |    |   |   |   |   |   |   |   |   |   |
| C-G-AA-----TG--GG Bacteria(100);Cyanobacteria(100);MLE1-12(100);unclassified(100);unclassified(100);unclassified(100);unclassified(100);unclassified(100);unclassified(100);                                             |   |   |   |   |   |   |   |   |   |   |   |   |   |   |   |   |   |    |   |   |   |   |   |   |   |   |   |
| Otu1257                                                                                                                                                                                                                  | 0 | 0 | 0 | 0 | 0 | 0 | 0 | 0 | 0 | 0 | 0 | 0 | 0 | 0 | 0 | 0 | 0 | 0  | 0 | 0 | 0 | 0 | 0 | 0 | 0 | 0 | 0 |
|                                                                                                                                                                                                                          | 0 | 0 | 0 | 0 | 0 | 0 | 0 | 0 | 0 | 0 | 0 | 0 | 0 | 0 | 0 | 0 | 0 | 0  | 0 | 0 | 0 | 0 | 0 | 0 | 0 | 0 | 0 |
|                                                                                                                                                                                                                          | 0 | 0 | 0 | 0 | 0 | 0 | 0 | 0 | 0 | 0 | 0 | 0 | 0 | 0 | 0 | 0 | 0 | 0  | 0 | 0 | 0 | 0 | 0 | 0 | 0 | 0 | 0 |
|                                                                                                                                                                                                                          | 0 | 0 | 0 | 0 | 0 | 0 | 0 | 0 | 0 | 0 | 0 | 0 | 0 | 0 | 0 | 0 | 0 | 22 | 0 | 0 | 0 | 0 | 0 | 0 | 0 | 0 | 0 |
| M02255_77_000000000-ADUT3_1_1108_6703_8097 T---AC---GT-AG-GTG-----GCA-A-G-----C-G-T---T-AT-C-CGG-AT-----TT-A-C-T--GG-GT-----GT-A---AA-GG-GC-GT-----G-TA-G-G-C-G-----G-C-TT-T-G-C-----AA-                                 |   |   |   |   |   |   |   |   |   |   |   |   |   |   |   |   |   |    |   |   |   |   |   |   |   |   |   |
| --G-T-C-A-----G-A-A-G--TG--A-AA-TT--C-T-CG-A-G----CT-C-AA-----C-T-C-G-G-G-C--G-C---T-G-C-T---T-C-----T-GA-A-A---C-----T-G-T-AA--A-A-C---T-T-G-A-G-T-A---C-TG-----GA-G-G-----G-G-A-A---AG-C-----GG--A--ATT---C-C-T-A-     |   |   |   |   |   |   |   |   |   |   |   |   |   |   |   |   |   |    |   |   |   |   |   |   |   |   |   |
| GT--GT-A-G-CG-GT--A---A-A-A---TG-C-GC-AG--AT-A-TT--A-G--G-A-G-G-A-AC-A-CC---GG--T--G--GC-GAA-G--G-C--G-----G-C-T-T-T---CTG--G--AC-A-G-----T-A---A-C-T--GA--CG-C-T-G--A-GG--C-G-CG-A--AA-G-C---G-TG--GG-G--AG-            |   |   |   |   |   |   |   |   |   |   |   |   |   |   |   |   |   |    |   |   |   |   |   |   |   |   |   |
| C-A-AA-----CA--GG Bacteria(100);Firmicutes(100);Clostridia(100);Clostridiales(100);unclassified(100);unclassified(100);unclassified(100);unclassified(100);unclassified(100);                                            |   |   |   |   |   |   |   |   |   |   |   |   |   |   |   |   |   |    |   |   |   |   |   |   |   |   |   |
| Otu1258                                                                                                                                                                                                                  | 0 | 0 | 0 | 0 | 0 | 0 | 0 | 0 | 0 | 0 | 0 | 0 | 0 | 0 | 0 | 0 | 0 | 0  | 0 | 0 | 0 | 0 | 0 | 0 | 0 | 0 | 0 |
|                                                                                                                                                                                                                          | 0 | 0 | 0 | 0 | 0 | 0 | 0 | 0 | 0 | 0 | 0 | 0 | 0 | 0 | 0 | 0 | 0 | 0  | 0 | 0 | 0 | 0 | 0 | 0 | 0 | 0 | 0 |
|                                                                                                                                                                                                                          | 0 | 0 | 0 | 0 | 0 | 0 | 0 | 0 | 0 | 0 | 0 | 0 | 0 | 0 | 0 | 0 | 0 | 0  | 0 | 0 | 0 | 0 | 0 | 0 | 0 | 0 | 0 |
|                                                                                                                                                                                                                          | 0 | 0 | 0 | 0 | 0 | 0 | 0 | 0 | 0 | 0 | 0 | 0 | 0 | 0 | 0 | 0 | 0 | 31 | 0 | 0 | 0 | 0 | 0 | 0 | 0 | 0 | 0 |
| M02255_77_000000000-ADUT3_1_1112_20779_4411 T---AC---GG-AG-GGG-----GCT-A-G-----C-G-T---T-GT-T-CGG-AA-----TT-A-C-T--GG-GC-----GT-A---AA-GC-GC-AC-----G-TA-G-G-C-G-----G-C-TT-C-C-T-----AA-                                |   |   |   |   |   |   |   |   |   |   |   |   |   |   |   |   |   |    |   |   |   |   |   |   |   |   |   |
| --G-T-C-A-----G-A-G--G--TG--A-AA-GC--C-T-GG-G-G----CT-C-AA-----C-C-C-C-A-G-A-A-C---T-G--C-C---T-T-----T-GA-G-A---C-----T-G-G--GT--C-G-C---T-T-G-A-A-T-C---C-GG-----GA-G-A-----G-G-T-G---AG-T-----GG--A--ATT---C-C-G-A-   |   |   |   |   |   |   |   |   |   |   |   |   |   |   |   |   |   |    |   |   |   |   |   |   |   |   |   |
| GT--GT-A-G-AG-GT--G---A-A-A---TT-C-GT-AG--AT-A-TT--C-G--G-A-A-G-A-AC-A-CC---AG--T--G--GC-GAA-G--G-C--G-----G-C-T-C-A---CTG--G--AC-C-G-----G-C---A-T-T--GA--CG-C-T-G--A-GG--T-G-CG-A--AA-G-C---G-TG--GG-G--AG-            |   |   |   |   |   |   |   |   |   |   |   |   |   |   |   |   |   |    |   |   |   |   |   |   |   |   |   |
| C-A-AA-----CA--GG Bacteria(100);Proteobacteria(100);Alphaproteobacteria(100);Sphingomonadales(100);unclassified(100);unclassified(100);unclassified(100);unclassified(100);unclassified(100);                            |   |   |   |   |   |   |   |   |   |   |   |   |   |   |   |   |   |    |   |   |   |   |   |   |   |   |   |
| Otu1259                                                                                                                                                                                                                  | 0 | 0 | 0 | 0 | 0 | 0 | 0 | 0 | 0 | 0 | 0 | 0 | 0 | 0 | 0 | 0 | 0 | 0  | 0 | 0 | 0 | 0 | 0 | 0 | 0 | 0 | 0 |
|                                                                                                                                                                                                                          | 0 | 0 | 0 | 0 | 0 | 0 | 0 | 0 | 0 | 0 | 0 | 0 | 0 | 0 | 0 | 0 | 0 | 0  | 0 | 0 | 0 | 0 | 0 | 0 | 0 | 0 | 0 |
|                                                                                                                                                                                                                          | 0 | 0 | 0 | 0 | 0 | 0 | 0 | 0 | 0 | 0 | 0 | 0 | 0 | 0 | 0 | 0 | 0 | 0  | 0 | 0 | 0 | 0 | 0 | 0 | 0 | 0 | 0 |
|                                                                                                                                                                                                                          | 0 | 0 | 0 | 0 | 0 | 0 | 0 | 0 | 0 | 0 | 0 | 0 | 0 | 0 | 0 | 0 | 0 | 34 | 0 | 0 | 0 | 0 | 0 | 0 | 0 | 0 | 0 |
| M02255_77_000000000-ADUT3_1_1115_17857_18984 T---AC---GT-AG-GGC-----GCA-A-G-----C-G-T---T-GT-C-CGG-AA-----TC-A-T-T--GG-GC-----GT-A---AA-GA-GC-TC-----G-TA-G-G-C-G-----G-C-TT-G-T-C-----                                  |   |   |   |   |   |   |   |   |   |   |   |   |   |   |   |   |   |    |   |   |   |   |   |   |   |   |   |
| -----AC---G-T-C-T-----G-C-T--G--TG--A-AA-TC--C-C-GG-G-G----CT-C-AA-----C-C-C-C-G-G-G--C-G---T-G--C-A--G-T-----G--GA-T-A---C-----G-G-G--CA--G-G-C---T-A-G-A-G-G--C---A-GG-----CA-G-G-----G-G-A-G---AA-C-----GG--A--ATT--- |   |   |   |   |   |   |   |   |   |   |   |   |   |   |   |   |   |    |   |   |   |   |   |   |   |   |   |
| C-C-C-G-GT--GT-A-G-CG-GT--G---A-A-A---TG-C-GC-AG--AT-A-TC--G-G--G-A-G-G-A-AC-A-CC---GG--T--G--GC-GAA-G--G-C--G-----G-T-T-C-T---CTG--G--GC-C-T-----G-T---A-C-T--GA--CG-C-T-G--A-GG--A-G-CG-A--AA-G-C---G-TG--             |   |   |   |   |   |   |   |   |   |   |   |   |   |   |   |   |   |    |   |   |   |   |   |   |   |   |   |
| GG-G--AG-C-G-AA-----CA--GG Bacteria(100);Actinobacteria(100);Actinobacteria(100);Actinobacteridae(100);Actinomycetales(100);unclassified(100);unclassified(100);unclassified(100);unclassified(100);                     |   |   |   |   |   |   |   |   |   |   |   |   |   |   |   |   |   |    |   |   |   |   |   |   |   |   |   |



Otu1260 0 0 0 0 0 0 0 0 0 0 0 0 0 0 0 0 0 0 0 0 0 0 0 0 0 0 0 0  
0 0 0 0 0 0 0 0 0 0 0 0 0 0 0 0 0 0 0 0 0 0 0 0 0 0 0 0  
0 0 0 0 0 0 0 0 0 0 0 0 0 0 0 0 0 0 0 0 0 0 0 0 0 0 0 0  
0 0 0 0 0 0 0 0 0 0 0 0 0 0 0 0 0 0 30 0 0 0 0 0 0 0  
M02255\_77\_000000000-ADUT3\_1\_1116\_7525\_23353 T---AC---GA-AG-GGG-----GCT-A-G-----C--G--T---T--GT-T-CGG-AA-----TT-A--C-T--GG-GC-----GT--A----AA-GC-GC-GC-----G-CA-G-G-C-G-----G--T-TC-T-T-C-----AA-  
---G-T-C-A-----G-A-G--G--TG--A-AA-GC--C-C-AG-A-G-----CT-C-AA-----C-T-C-T-G-G-A--A-T---G-G--C-C---T--T-----T--GA-G-A--C-----T-A-G--AG--A-A-C---T-A-G-G-G-T--A---C-GG----GA-G-A-----G-G-T-G---AG-T-----GG--A--ATT---C-C-G-A-  
GT--GT-A-G-AG-GT--G---A--A-A---TT-C-GT-AG--AT-A-TT--C-G--G-A-A-G-A-AC-A-CC---AG--T--G--GC-GAA-G--G-C--G-----G--C-T-C-A---CTG--G--CC-C-G-----T-T---A-C-C--GA--CG-C-T-C--A-GG--C-G-CG-A--CA-G-C--G-TG--GG-G--AG-C-  
A-AA-----CA--GG Bacteria(100);Proteobacteria(100);Alphaproteobacteria(100);unclassified(100);unclassified(100);unclassified(100);unclassified(100);unclassified(100);unclassified(100);

Otu1261 0 0 0 0 0 0 0 0 0 0 0 0 0 0 0 0 0 0 0 0 0 0 0 0 0 0 0 0  
0 0 0 0 0 0 0 0 0 0 0 0 0 0 0 0 0 0 0 0 0 0 0 0 0 0 0 0  
0 0 0 0 0 0 0 0 0 0 0 0 0 0 0 0 0 0 0 0 0 0 0 0 0 0 0 0  
0 0 0 0 0 0 0 0 0 0 0 0 0 0 0 0 0 0 0 0 0 0 0 0 27 0 0  
M02255\_77\_000000000-ADUT3\_1\_1112\_24579\_14818 T---AC---GG-AG-GGG-----GCT-A-G-----C--G--T---T--GT-T-CGG-AA-----TT-A--C-T--GG-GC-----GT--A----AA-GC-GC-GC-----G-TA-G-G-C-G-----G--C-TT-T-G-C-----  
-----AA---G-T-C-A-----G-A-G--G--TG--A-AA-GC--C-C-GG-G-G-----CT-C-AA-----C-C-C-C-G-G-A--A-T---T-G--C-C---T--T-----T--GA-A-A--C-----T--G-C-AT--C-G-C---T-A-G-A-A-C--G---T-CG----GA-G-A-----G-G-T-G---AG-T-----GG--A--ATT---  
C-C-G-A-GT--GT-A-G-AG-GT--G---A--A-A---TT-C-GT-AG--AT-A-TT--C-G--G-A-A-G-A-AC-A-CC---AG--T--G--GC-GAA-G--G-C--G-----A--C-T-C-A---CTG--G--AC-G-A-----C-T---G-T-T--GA--CG-C-T-G--A-GG--T-G-CG-A--AA-G-C---G-TG--GG-  
G--AG-C-A-AA-----CA--GG Bacteria(100);Proteobacteria(100);Alphaproteobacteria(100);Sphingomonadales(100);unclassified(100);unclassified(100);unclassified(100);unclassified(100);unclassified(100);

Otu1262 0 0 0 0 0 0 0 0 0 0 0 0 0 0 0 0 0 0 0 0 0 0 0 0 0 0 0 0  
0 0 0 0 0 0 0 0 0 0 0 0 0 0 0 0 0 0 0 0 0 0 0 0 0 0 0 0  
0 0 0 0 0 0 0 0 0 0 0 0 0 0 0 0 0 0 0 0 0 0 0 0 0 0 0 0  
0 0 0 0 0 0 0 0 0 0 0 0 0 0 0 0 0 0 0 0 0 0 0 0 14 0 0  
M02255\_77\_000000000-ADUT3\_1\_1101\_3204\_18259 T---AC---GT-AG-GGG-----GCA-A-G-----C--G--T---T--AT-C-CGG-AA-----TT-A--T-T--GG-GC-----GT--A----AA-GA-GT-AC-----G-TA-G-G-C-G-----G--T-TT-C-T-T-----AA--  
--G-C-G-C-----A-G-G--G--TC--T-AA-GG--C-T-AT-G-G-----CT-C-AA-----C-C-A-T-A-G-T--T-----C-G--C-C---C-T-----G--TG-A-A--C-----T--G-G--GA--G-A-C---T-T-G-A-G-T--A---T-CG----GA-G-A-----G-G-A-A--AG-C-----GG--A--ATT---C-C-T-A-  
GT--GT-A-G-CG-GT--G---A--A-A---TG-C-GT-AG--AT-A-TT--A-G--G-A-G-G-A-AC-A-CC---AG--T--G--GC-GAA-G--G-C--G-----G--C-T-T-T---CTG--G--AC-G-A-----A-T---A-C-T--GA--CG-C-T-G--A-GG--T-A-CG-A--AA-G-C---G-TG--GG-G--AG-  
C-A-AA-----CA--GG Bacteria(100);Firmicutes(100);Clostridia(100);Clostridiales(100);unclassified(100);unclassified(100);unclassified(100);unclassified(100);unclassified(100);

Otu1263 0 0 0 0 0 0 0 0 0 0 0 0 0 0 0 0 0 0 0 0 0 0 0 0 0 0 0 0  
0 0 0 0 0 0 0 0 0 0 0 0 0 0 0 0 0 0 0 0 0 0 0 0 0 0 0 0  
0 0 0 0 0 0 0 0 0 0 0 0 0 0 0 0 0 0 0 0 0 0 0 0 0 0 0 0  
0 0 0 0 0 0 0 0 0 0 0 0 0 0 0 0 0 0 0 0 0 0 0 0 18 0 0  
M02255\_77\_000000000-ADUT3\_1\_1102\_6524\_8289 T---AC---GT-AG-GGA-----GCG-A-G-----C--G--T---T--GT-C-CGG-AA-----TT-A--C-T--GG-GT-----GT--A----AA-GG-GA-GC-----G-TA-G-G-C-G-----G--G-AA-G-G-C-----  
AA---G-T-T-G-----G-A-T--G--TG--A-AA-AC--T-G-TG-G-G-----CT-C-AA-----C-C-G-A-C-A-G--A-C---T-G--C-A---T--T-----C--AA-A-A--C-----T--G-T--TT--T-T-C---T-T-G-A-G-T--G---A-AG----TA-G-A-----G-G-C-A---AG-C-----GG--A--ATT---C-C-T-A-  
A-GT--GT-A-G-CG-GT--G---A--A-A---TG-C-GT-AG--AT-A-TT--A-G--G-A-G-G-A-AC-A-CC---AG--T--G--GC-GAA-G--G-C--G-----G--C-T-T-G---CTG--G--GC-T-T-----T-T---A-C-T--GA--CG-C-T-G--A-GG--C-T-CG-A--AA-G-T---G-TG--GG-G--AG-  
C-A-AA-----CA--GG Bacteria(100);Firmicutes(100);Clostridia(100);Clostridiales(100);unclassified(100);unclassified(100);unclassified(100);unclassified(100);unclassified(100);

Otu1264 0 0 0 0 0 0 0 0 0 0 0 0 0 0 0 0 0 0 0 0 0 0 0 0 0 0 0 0  
0 0 0 0 0 0 0 0 0 0 0 0 0 0 0 0 0 0 0 0 0 0 0 0 0 0 0 0  
0 0 0 0 0 0 0 0 0 0 0 0 0 0 0 0 0 0 0 0 0 0 0 0 0 0 0 0  
0 0 0 0 0 0 0 0 0 0 0 0 0 0 0 0 0 0 0 0 0 0 0 0 14 0 0  
M02255\_77\_000000000-ADUT3\_1\_1109\_5050\_14066 T---AC---GT-AG-GGG-----GCA-A-G-----C--G--T---T--AT-C-CGG-AT-----TT-A--C-T--GG-GT-----GT--A----AA-GG-GA-GC-----G-TA-G-G-T-G-----G--T-TT-G-G-T-----AA-  
---G-T-C-A-----G-G-T--G--TG--A-AA-GC--C-C-GG-G-G-----CT-C-AA-----C-T-C-C-G-G-G--A-T---T-G--C-A--C---T-----T--GA-A-A--C-----T--A-T--CA--A-A-C---T-A-G-A-G-T--G---C-AG----GA-G-A-----G-G-T-A--AG-T-----GG--A--ATT---C-C-T-A-  
GT--GT-A-G-CG-GT--G---A--A-A---TG-C-GT-AG--AT-A-TT--A-G--G-A-G-G-A-AC-A-CC---AG--T--G--GC-GAA-G--G-C--G-----G--C-T-T-A---CTG--G--AC-T-G-----T-A---A-C-T--GA--CA-C-T-G--A-GG--C-T-CG-A--AA-G-C---G-TG--GG-G--AG-  
C-A-AA-----CA--GG Bacteria(100);Firmicutes(100);Clostridia(100);Clostridiales(100);unclassified(100);unclassified(100);unclassified(100);unclassified(100);unclassified(100);



|         |                                                                                                                                                                                                                                                                                                                                                                                                                                                                                                                                                                                                                                                                                                                                                                                                                          |   |   |   |   |   |   |   |   |   |   |   |   |   |   |   |   |   |   |   |   |   |   |    |   |   |   |  |
|---------|--------------------------------------------------------------------------------------------------------------------------------------------------------------------------------------------------------------------------------------------------------------------------------------------------------------------------------------------------------------------------------------------------------------------------------------------------------------------------------------------------------------------------------------------------------------------------------------------------------------------------------------------------------------------------------------------------------------------------------------------------------------------------------------------------------------------------|---|---|---|---|---|---|---|---|---|---|---|---|---|---|---|---|---|---|---|---|---|---|----|---|---|---|--|
| Otu1265 | 0                                                                                                                                                                                                                                                                                                                                                                                                                                                                                                                                                                                                                                                                                                                                                                                                                        | 0 | 0 | 0 | 0 | 0 | 0 | 0 | 0 | 0 | 0 | 0 | 0 | 0 | 0 | 0 | 0 | 0 | 0 | 0 | 0 | 0 | 0 | 0  | 0 | 0 | 0 |  |
|         | 0                                                                                                                                                                                                                                                                                                                                                                                                                                                                                                                                                                                                                                                                                                                                                                                                                        | 0 | 0 | 0 | 0 | 0 | 0 | 0 | 0 | 0 | 0 | 0 | 0 | 0 | 0 | 0 | 0 | 0 | 0 | 0 | 0 | 0 | 0 | 0  | 0 | 0 | 0 |  |
|         | 0                                                                                                                                                                                                                                                                                                                                                                                                                                                                                                                                                                                                                                                                                                                                                                                                                        | 0 | 0 | 0 | 0 | 0 | 0 | 0 | 0 | 0 | 0 | 0 | 0 | 0 | 0 | 0 | 0 | 0 | 0 | 0 | 0 | 0 | 0 | 0  | 0 | 0 | 0 |  |
|         | 0                                                                                                                                                                                                                                                                                                                                                                                                                                                                                                                                                                                                                                                                                                                                                                                                                        | 0 | 0 | 0 | 0 | 0 | 0 | 0 | 0 | 0 | 0 | 0 | 0 | 0 | 0 | 0 | 0 | 0 | 0 | 0 | 0 | 0 | 0 | 28 | 0 | 0 |   |  |
|         | M02255_77_000000000-ADUT3_1_1109_16426_21261 T---AC---GA-AG-GGG-----GCT-A-G-----C-G-T---T-GT-T-CGG-AT-----TT-A-C-T-GG-GC-----GT--A-----AA-GC-GC-AC-----G-TA-G-G-C-G-----G--A-TC-A-T-T-----AA---G-T-C-A-----G-G-G-G-TG--A-AA-TC-C-C-GA-G-G----CT-C-AA-----C-C-T-C-G-G-A--A-C---T-G--C-C---T-T-----T-GA-T-A--C-----T-G-G--TG--A-T-C---T-T-G-A-G-T--C--C-GG---GA-G-A-----G-G-T-G---AG-T-----GG--A--ACT---G-C-G-A-GT--GT-A-G-AG-GT--G---A-A-A---TT-C-GT-AG--AT-A-TT--C-G--C-A-A-G-A-AC-A-CC---AG--T-G--GC-GAA-G-G-C--G-----G--C-T-C-A---CTG--G--CC-C-G-----G-A---A-C-T--GA--CG-C-T-G--A-GG--T-G-CG-A-AA-G-C---G-TG--GG-G--AG-C-A-AA-----CA--GG Bacteria(100);Proteobacteria(100);Alphaproteobacteria(100);Rhizobiales(100);unclassified(100);unclassified(100);unclassified(100);unclassified(100);unclassified(100);        |   |   |   |   |   |   |   |   |   |   |   |   |   |   |   |   |   |   |   |   |   |   |    |   |   |   |  |
| Otu1266 | 0                                                                                                                                                                                                                                                                                                                                                                                                                                                                                                                                                                                                                                                                                                                                                                                                                        | 0 | 0 | 0 | 0 | 0 | 0 | 0 | 0 | 0 | 0 | 0 | 0 | 0 | 0 | 0 | 0 | 0 | 0 | 0 | 0 | 0 | 0 | 0  | 0 | 0 | 0 |  |
|         | 0                                                                                                                                                                                                                                                                                                                                                                                                                                                                                                                                                                                                                                                                                                                                                                                                                        | 0 | 0 | 0 | 0 | 0 | 0 | 0 | 0 | 0 | 0 | 0 | 0 | 0 | 0 | 0 | 0 | 0 | 0 | 0 | 0 | 0 | 0 | 0  | 0 | 0 | 0 |  |
|         | 0                                                                                                                                                                                                                                                                                                                                                                                                                                                                                                                                                                                                                                                                                                                                                                                                                        | 0 | 0 | 0 | 0 | 0 | 0 | 0 | 0 | 0 | 0 | 0 | 0 | 0 | 0 | 0 | 0 | 0 | 0 | 0 | 0 | 0 | 0 | 0  | 0 | 0 | 0 |  |
|         | 0                                                                                                                                                                                                                                                                                                                                                                                                                                                                                                                                                                                                                                                                                                                                                                                                                        | 0 | 0 | 0 | 0 | 0 | 0 | 0 | 0 | 0 | 0 | 0 | 0 | 0 | 0 | 0 | 0 | 0 | 0 | 0 | 0 | 0 | 0 | 29 | 0 | 0 |   |  |
|         | M02255_77_000000000-ADUT3_1_1115_8423_10154 T---AC---GA-AG-GGG-----GCT-A-G-----C-G-T---T-GC-T-CGG-AA-----TC-A-T-T-GG-GC-----GT--A-----AA-GG-GC-GC-----G-TA-G-G-C-G-----G--C-CC-C-G-T-----TA---G-T-C-A-----G-G-C--G--TG--A-AA-CC-C-C-CG-G-G----CT-C-AA-----C-C-C-G-G-G-G--A-C---T-G--C-G---C--T-----T-GA-T-A--C-----G--G-C--GG--G-G-C---T-T-G-A-G-G-A--C-GG---GA-G-A-----G-G-C-T---CG-C-----GG--A--ATT---C-C-C-A-GT--GT-A-G-AG-GT--G---A-A-A---TT-C-GT-AG--AT-A-TT--G-G--G-A-A-G-A-AC-A-CC---GG--T-G--GC-GAA-G-G-C--G-----G--C-G-A-G---CTG--G--CC-C-G-----T-T---T-C-T--GA--CG-C-T-G--A-GG--C-G-CG-A-CA-G-C---G-TG--GG-G--AG-C-A-AA-----CA--GG Bacteria(100);Proteobacteria(100);Alphaproteobacteria(100);Rhodospirillales(100);unclassified(100);unclassified(100);unclassified(100);unclassified(100);unclassified(100); |   |   |   |   |   |   |   |   |   |   |   |   |   |   |   |   |   |   |   |   |   |   |    |   |   |   |  |
| Otu1267 | 0                                                                                                                                                                                                                                                                                                                                                                                                                                                                                                                                                                                                                                                                                                                                                                                                                        | 0 | 0 | 0 | 0 | 0 | 0 | 0 | 0 | 0 | 0 | 0 | 0 | 0 | 0 | 0 | 0 | 0 | 0 | 0 | 0 | 0 | 0 | 0  | 0 | 0 | 0 |  |
|         | 0                                                                                                                                                                                                                                                                                                                                                                                                                                                                                                                                                                                                                                                                                                                                                                                                                        | 0 | 0 | 0 | 0 | 0 | 0 | 0 | 0 | 0 | 0 | 0 | 0 | 0 | 0 | 0 | 0 | 0 | 0 | 0 | 0 | 0 | 0 | 0  | 0 | 0 | 0 |  |
|         | 0                                                                                                                                                                                                                                                                                                                                                                                                                                                                                                                                                                                                                                                                                                                                                                                                                        | 0 | 0 | 0 | 0 | 0 | 0 | 0 | 0 | 0 | 0 | 0 | 0 | 0 | 0 | 0 | 0 | 0 | 0 | 0 | 0 | 0 | 0 | 0  | 0 | 0 | 0 |  |
|         | 0                                                                                                                                                                                                                                                                                                                                                                                                                                                                                                                                                                                                                                                                                                                                                                                                                        | 0 | 0 | 0 | 0 | 0 | 0 | 0 | 0 | 0 | 0 | 0 | 0 | 0 | 0 | 0 | 0 | 0 | 0 | 0 | 0 | 0 | 0 | 14 | 0 | 0 |   |  |
|         | M02255_77_000000000-ADUT3_1_2105_23119_10145 T---AC---GT-AA-GGG-----GCA-A-G-----C-G-T---T-AT-C-CGG-AT-----TT-A-C-T-GG-GT-----GT--A-----AA-GG-GA-GC-----G-TA-G-A-C-G-----G--T-TT-G-G-C-----AA---G-T-C-T-----G-A-T--G--TG--A-AA-GG--C-A-TG-G-G----CT-C-AA-----C-C-T-G-T-G-G--A-C---T-G--C-A---T-T-----G--GA-A-A--C-----T-G-T--CA--G-A-C---T-T-G-A-G-T--G---C-CG---GA-G-A-----G-G-C-A---AG-C-----GG--A--ATT---C-C-T-A-GT--GT-A-G-CG-GT--G---A-A-A---TG-C-GT-AG--AT-A-TT--A-G--G-A-G-G-A-AC-A-CC---AG--T-G--GC-GAA-G-G-C--G-----G--CC-T-G---CTG--G--AC-G-G-----T-A---A-C-T--GA--CG-T-T-G--A-GG--C-T-CG-A-AA-G-C---G-TG--GG-G--AG-C-A-AA-----CA--GG Bacteria(100);Firmicutes(100);Clostridia(100);Clostridiales(100);Lachnospiraceae(100);Blautia(100);unclassified(100);unclassified(100);unclassified(100);                 |   |   |   |   |   |   |   |   |   |   |   |   |   |   |   |   |   |   |   |   |   |   |    |   |   |   |  |
| Otu1268 | 0                                                                                                                                                                                                                                                                                                                                                                                                                                                                                                                                                                                                                                                                                                                                                                                                                        | 0 | 0 | 0 | 0 | 0 | 0 | 0 | 0 | 0 | 0 | 0 | 0 | 0 | 0 | 0 | 0 | 0 | 0 | 0 | 0 | 0 | 0 | 0  | 0 | 0 | 0 |  |
|         | 0                                                                                                                                                                                                                                                                                                                                                                                                                                                                                                                                                                                                                                                                                                                                                                                                                        | 0 | 0 | 0 | 0 | 0 | 0 | 0 | 0 | 0 | 0 | 0 | 0 | 0 | 0 | 0 | 0 | 0 | 0 | 0 | 0 | 0 | 0 | 0  | 0 | 0 | 0 |  |
|         | 0                                                                                                                                                                                                                                                                                                                                                                                                                                                                                                                                                                                                                                                                                                                                                                                                                        | 0 | 0 | 0 | 0 | 0 | 0 | 0 | 0 | 0 | 0 | 0 | 0 | 0 | 0 | 0 | 0 | 0 | 0 | 0 | 0 | 0 | 0 | 0  | 0 | 0 | 0 |  |
|         | 0                                                                                                                                                                                                                                                                                                                                                                                                                                                                                                                                                                                                                                                                                                                                                                                                                        | 0 | 0 | 0 | 0 | 0 | 0 | 0 | 0 | 0 | 0 | 0 | 0 | 0 | 0 | 0 | 0 | 0 | 0 | 0 | 0 | 0 | 0 | 22 | 0 | 0 |   |  |
|         | M02255_77_000000000-ADUT3_1_2109_4842_19235 T---AC---GG-AG-GGT-----GCA-A-G-----C-G-T---T-GT-T-CGG-AA-----TT-A-C-T-GG-GC-----GT--A-----AA-GC-GT-AC-----G-TA-G-G-C-G-----                                                                                                                                                                                                                                                                                                                                                                                                                                                                                                                                                                                                                                                  |   |   |   |   |   |   |   |   |   |   |   |   |   |   |   |   |   |   |   |   |   |   |    |   |   |   |  |



|                                                                                                                                                                                                              |   |   |   |   |   |   |   |   |   |   |   |   |   |   |   |   |   |   |   |   |   |   |   |    |    |   |   |
|--------------------------------------------------------------------------------------------------------------------------------------------------------------------------------------------------------------|---|---|---|---|---|---|---|---|---|---|---|---|---|---|---|---|---|---|---|---|---|---|---|----|----|---|---|
| Otu1270                                                                                                                                                                                                      | 0 | 0 | 0 | 0 | 0 | 0 | 0 | 0 | 0 | 0 | 0 | 0 | 0 | 0 | 0 | 0 | 0 | 0 | 0 | 0 | 0 | 0 | 0 | 0  | 0  | 0 | 0 |
|                                                                                                                                                                                                              | 0 | 0 | 0 | 0 | 0 | 0 | 0 | 0 | 0 | 0 | 0 | 0 | 0 | 0 | 0 | 0 | 0 | 0 | 0 | 0 | 0 | 0 | 0 | 0  | 0  | 0 | 0 |
|                                                                                                                                                                                                              | 0 | 0 | 0 | 0 | 0 | 0 | 0 | 0 | 0 | 0 | 0 | 0 | 0 | 0 | 0 | 0 | 0 | 0 | 0 | 0 | 0 | 0 | 0 | 0  | 0  | 0 | 0 |
|                                                                                                                                                                                                              | 0 | 0 | 0 | 0 | 0 | 0 | 0 | 0 | 0 | 0 | 0 | 0 | 0 | 0 | 0 | 0 | 0 | 0 | 0 | 0 | 0 | 0 | 0 | 3  | 0  | 0 | 0 |
| M02255_76_000000000-ADUNE_1_1119_5111_17127 T---TA---GC-TG-CAG-----AAT-A-A---G-C-A---C-CG-G-CTA-AC-----TC-T--G-T-GC-CA-----GC-AG---CC-GC-GG-TA-----A-TACA-G-A-G-----G-G-TC-C-A-A-----                        |   |   |   |   |   |   |   |   |   |   |   |   |   |   |   |   |   |   |   |   |   |   |   |    |    |   |   |
| GC---G-T-C-A-----G-A-T--C--GG--A-AA-TC--C-C-CG-G-G---CT-T-AA-----C-C-T-G-G-G-A-A-C---T-G-C-A--T-C-----T-GA-A-A--C-----T-G-T-AG-A-G-C---T-A-G-A-G-T-A--T-GT----GA-G-A-----G-G-A-A--GG-T----AG-A-ATT---C-C-A-  |   |   |   |   |   |   |   |   |   |   |   |   |   |   |   |   |   |   |   |   |   |   |   |    |    |   |   |
| G-GT--GT-A-G-CG-GT--G---A-A-A---TG-C-GT-AG--AG-A-TC--T-G-G-A-G-G-A-AT-A-CC--GA--T-G--GC-GAA-G-G-C-A-----G-C-C-T-T--CTG--G--CA-T-A-----A-T---A-C-T-GA-CA-C-T-G--A-GG--C-T-CG-A-AA-G-C--G-TG--GG-T--AG-        |   |   |   |   |   |   |   |   |   |   |   |   |   |   |   |   |   |   |   |   |   |   |   |    |    |   |   |
| C-A-AA-----CA--GG     Bacteria(100);Proteobacteria(100);Gammaproteobacteria(100);unclassified(100);unclassified(100);unclassified(100);unclassified(100);unclassified(100);unclassified(100);                |   |   |   |   |   |   |   |   |   |   |   |   |   |   |   |   |   |   |   |   |   |   |   |    |    |   |   |
| Otu1271                                                                                                                                                                                                      | 0 | 0 | 0 | 0 | 0 | 0 | 0 | 0 | 0 | 0 | 0 | 0 | 0 | 0 | 0 | 0 | 0 | 0 | 0 | 0 | 0 | 0 | 0 | 0  | 0  | 0 | 0 |
|                                                                                                                                                                                                              | 0 | 0 | 0 | 0 | 0 | 0 | 0 | 0 | 0 | 0 | 0 | 0 | 0 | 0 | 0 | 0 | 0 | 0 | 0 | 0 | 0 | 0 | 0 | 0  | 0  | 0 | 0 |
|                                                                                                                                                                                                              | 0 | 0 | 0 | 0 | 0 | 0 | 0 | 0 | 0 | 0 | 0 | 0 | 0 | 0 | 0 | 0 | 0 | 0 | 0 | 0 | 0 | 0 | 0 | 0  | 0  | 0 | 0 |
|                                                                                                                                                                                                              | 0 | 0 | 0 | 0 | 0 | 0 | 0 | 0 | 0 | 0 | 0 | 0 | 0 | 0 | 0 | 0 | 0 | 0 | 0 | 0 | 0 | 0 | 0 | 17 | 0  | 0 | 0 |
| M02255_77_000000000-ADUT3_1_1107_7155_9886    T---AC--GT-AG-GTG-----GCA-A-G---C-G-T--T--AT-C-CGG-AA-----TT-A-C-T-GG-GT-----GT--A---AA-GG-GT-GT-----G-TA-G-G-C-G-----G-G-GC-G-A-C-----                        |   |   |   |   |   |   |   |   |   |   |   |   |   |   |   |   |   |   |   |   |   |   |   |    |    |   |   |
| AA---G-T-C-A-----G-A-T--G--TG--A-AA-AT--T-A-TG-G-G---CT-C-AA-----C-C-C-A-T-A-A--C-C---T-G-C-G--T-C-----T-GA-A-A--C-----T-G-T-TG-C-T-C---T-T-G-A-G-A-G--T-GG---GA-G-A-----G-G-T-A--AA-T----GG--A-ATT---C-C-C- |   |   |   |   |   |   |   |   |   |   |   |   |   |   |   |   |   |   |   |   |   |   |   |    |    |   |   |
| G-GT--GT-A-G-CG-GT--G---A-A-A---TG-C-GT-AG--AT-A-TC--G-G-G-A-G-G-A-AC-A-CC--AG--T-G--GC-GAA-G-G-C-G-----A-T-T-T-A--CTG--G--AC-C-A-----C-A--A-C-T-GA-CG-C-T-G--A-GA--C-A-CG-A-AA-G-C--G-TG--GG-G--            |   |   |   |   |   |   |   |   |   |   |   |   |   |   |   |   |   |   |   |   |   |   |   |    |    |   |   |
| AG-C-A-AA-----CA--GG     Bacteria(100);unclassified(100);unclassified(100);unclassified(100);unclassified(100);unclassified(100);unclassified(100);unclassified(100);unclassified(100);                      |   |   |   |   |   |   |   |   |   |   |   |   |   |   |   |   |   |   |   |   |   |   |   |    |    |   |   |
| Otu1272                                                                                                                                                                                                      | 0 | 0 | 0 | 0 | 0 | 0 | 0 | 0 | 0 | 0 | 0 | 0 | 0 | 0 | 0 | 0 | 0 | 0 | 0 | 0 | 0 | 0 | 0 | 0  | 0  | 0 | 0 |
|                                                                                                                                                                                                              | 0 | 0 | 0 | 0 | 0 | 0 | 0 | 0 | 0 | 0 | 0 | 0 | 0 | 0 | 0 | 0 | 0 | 0 | 0 | 0 | 0 | 0 | 0 | 0  | 0  | 0 | 0 |
|                                                                                                                                                                                                              | 0 | 0 | 0 | 0 | 0 | 0 | 0 | 0 | 0 | 0 | 0 | 0 | 0 | 0 | 0 | 0 | 0 | 0 | 0 | 0 | 0 | 0 | 0 | 0  | 0  | 0 | 0 |
|                                                                                                                                                                                                              | 0 | 0 | 0 | 0 | 0 | 0 | 0 | 0 | 0 | 0 | 0 | 0 | 0 | 0 | 0 | 0 | 0 | 0 | 0 | 0 | 0 | 0 | 0 | 0  | 15 | 0 | 0 |
| M02255_76_000000000-ADUNE_1_2114_12107_8729 .....AC---T-A--CGT-----GCC-A-G---C-A-G--C--CG-C-GGT-AA-----CA-C-G-T-AG-GG-----GG--C---AA-GC-G-TT-----G-T---C-C-G-----G-A-TT-C-G-T-----AA---G-                    |   |   |   |   |   |   |   |   |   |   |   |   |   |   |   |   |   |   |   |   |   |   |   |    |    |   |   |
| T-T-G-----G-G-C--G--TA--AAGA-GCT-C-G-TA-G-G---CT-C-AA-----C-C-T-G-GAG-A-----C-G-CC-A--C--C---C-GA-T-A--C-----T-G-C--GA-TG-A-C---T-A-G-A-G-T-C--C-GG---TA-G-G-----G-G-A-G--TG-T----GG--A-ATT---C-C-T-G-GT-    |   |   |   |   |   |   |   |   |   |   |   |   |   |   |   |   |   |   |   |   |   |   |   |    |    |   |   |
| -GT-A-G-CG-GT--G---A-A-A---TG-C-GC-AG--AT-A-TC--A-G-G-A-G-G-A-AC-A-CC--AA--C-G--GC-GAA-G-G-C-A-----G-C-A-C-T--CTG--G--GC-C-G-----G-A--A-C-T-GA-CG-C-T-G--A-GG--A-G-CG-A-AA-G-C--G-TG--GG-T--AG-C-G-          |   |   |   |   |   |   |   |   |   |   |   |   |   |   |   |   |   |   |   |   |   |   |   |    |    |   |   |
| AA-----CA--GG     Bacteria(100);Actinobacteria(100);Actinobacteria(100);Acidimicrobiae(100);Acidimicrobiales(100);Acidimicrobinae(100);unclassified(100);unclassified(100);unclassified(100);                |   |   |   |   |   |   |   |   |   |   |   |   |   |   |   |   |   |   |   |   |   |   |   |    |    |   |   |
| Otu1273                                                                                                                                                                                                      | 0 | 0 | 0 | 0 | 0 | 0 | 0 | 0 | 0 | 0 | 0 | 0 | 0 | 0 | 0 | 0 | 0 | 0 | 0 | 0 | 0 | 0 | 0 | 0  | 0  | 0 | 0 |
|                                                                                                                                                                                                              | 0 | 0 | 0 | 0 | 0 | 0 | 0 | 0 | 0 | 0 | 0 | 0 | 0 | 0 | 0 | 0 | 0 | 0 | 0 | 0 | 0 | 0 | 0 | 0  | 0  | 0 | 0 |
|                                                                                                                                                                                                              | 0 | 0 | 0 | 0 | 0 | 0 | 0 | 0 | 0 | 0 | 0 | 0 | 0 | 0 | 0 | 0 | 0 | 0 | 0 | 0 | 0 | 0 | 0 | 0  | 0  | 0 | 0 |
|                                                                                                                                                                                                              | 0 | 0 | 0 | 0 | 0 | 0 | 0 | 0 | 0 | 0 | 0 | 0 | 0 | 0 | 0 | 0 | 0 | 0 | 0 | 0 | 0 | 0 | 0 | 0  | 13 | 0 | 0 |
| M02255_76_00000000                                                                                                                                                                                           |   |   |   |   |   |   |   |   |   |   |   |   |   |   |   |   |   |   |   |   |   |   |   |    |    |   |   |



|         |                                              |   |   |   |   |   |   |   |   |   |                                                                                                                                                                                                                                                                                                                                                                                                                                                                                                                                                                                                    |   |   |   |   |   |    |   |   |   |   |   |   |   |   |                                                                                                                                                                                            |   |  |  |  |  |  |  |  |  |  |  |  |  |  |
|---------|----------------------------------------------|---|---|---|---|---|---|---|---|---|----------------------------------------------------------------------------------------------------------------------------------------------------------------------------------------------------------------------------------------------------------------------------------------------------------------------------------------------------------------------------------------------------------------------------------------------------------------------------------------------------------------------------------------------------------------------------------------------------|---|---|---|---|---|----|---|---|---|---|---|---|---|---|--------------------------------------------------------------------------------------------------------------------------------------------------------------------------------------------|---|--|--|--|--|--|--|--|--|--|--|--|--|--|
| Otu1275 | 0                                            | 0 | 0 | 0 | 0 | 0 | 0 | 0 | 0 | 0 | 0                                                                                                                                                                                                                                                                                                                                                                                                                                                                                                                                                                                                  | 0 | 0 | 0 | 0 | 0 | 0  | 0 | 0 | 0 | 0 | 0 | 0 | 0 | 0 | 0                                                                                                                                                                                          | 0 |  |  |  |  |  |  |  |  |  |  |  |  |  |
|         | 0                                            | 0 | 0 | 0 | 0 | 0 | 0 | 0 | 0 | 0 | 0                                                                                                                                                                                                                                                                                                                                                                                                                                                                                                                                                                                                  | 0 | 0 | 0 | 0 | 0 | 0  | 0 | 0 | 0 | 0 | 0 | 0 | 0 | 0 | 0                                                                                                                                                                                          | 0 |  |  |  |  |  |  |  |  |  |  |  |  |  |
|         | 0                                            | 0 | 0 | 0 | 0 | 0 | 0 | 0 | 0 | 0 | 0                                                                                                                                                                                                                                                                                                                                                                                                                                                                                                                                                                                                  | 0 | 0 | 0 | 0 | 0 | 0  | 0 | 0 | 0 | 0 | 0 | 0 | 0 | 0 | 0                                                                                                                                                                                          | 0 |  |  |  |  |  |  |  |  |  |  |  |  |  |
|         | 0                                            | 0 | 0 | 0 | 0 | 0 | 0 | 0 | 0 | 0 | 0                                                                                                                                                                                                                                                                                                                                                                                                                                                                                                                                                                                                  | 0 | 0 | 0 | 0 | 0 | 0  | 0 | 0 | 0 | 0 | 0 | 0 | 0 | 0 | 0                                                                                                                                                                                          | 0 |  |  |  |  |  |  |  |  |  |  |  |  |  |
|         | M02255_77_000000000-ADUT3_1_1108_16029_12335 |   |   |   |   |   |   |   |   |   | T---AC---GT-AG-GAC-----CCA-A-G-----C-G--T---T--AT-C-CGG-AG-----TG-A--C-T-GG-GC-----GT--A-----AA-GA-GTTGC-----G-TA-G-G-C-G-----G--T-CT-G-T-A-----AA---G-C-G-A-----A-T-A--G--TG--A-AA-GA--T-G-AT-G-G----CT-C-AA-----C-C-A-T--CA-G--A-A---C-A-T-T--G-T-----T--CG-A-A--C-----T--C-A--CA--G-A-C---T-C-G-A-G-A-A--T-GG----TA-G-A-----G-G-T-A--GC-T-----GG--A--ATT-----T-C-G-T-GT--GT-A-G-GA-GT--G---A-A-A--TC-C-GT-AG--AT-A-TA--C-G--A-A-G-G-A-AC-A-CC--AA--T--G--GC-GTA-G--G-C-A-----G--G-C-T-A--CTG--G--AC-C-A-----T-T--T-C-T--GA--CG-C-T-G--A-GG--C-A-CG-A--AA-G-C--G-TG--GG-G--AG-C-G-AA-----CC--GG  |   |   |   |   |   |    |   |   |   |   |   |   |   |   | Bacteria(100);Candidate_division_TM7(100);unclassified(100);unclassified(100);unclassified(100);unclassified(100);unclassified(100);unclassified(100);unclassified(100);unclassified(100); |   |  |  |  |  |  |  |  |  |  |  |  |  |  |
| Otu1276 | 0                                            | 0 | 0 | 0 | 0 | 0 | 0 | 0 | 0 | 0 | 0                                                                                                                                                                                                                                                                                                                                                                                                                                                                                                                                                                                                  | 0 | 0 | 0 | 0 | 0 | 0  | 0 | 0 | 0 | 0 | 0 | 0 | 0 | 0 | 0                                                                                                                                                                                          | 0 |  |  |  |  |  |  |  |  |  |  |  |  |  |
|         | 0                                            | 0 | 0 | 0 | 0 | 0 | 0 | 0 | 0 | 0 | 0                                                                                                                                                                                                                                                                                                                                                                                                                                                                                                                                                                                                  | 0 | 0 | 0 | 0 | 0 | 0  | 0 | 0 | 0 | 0 | 0 | 0 | 0 | 0 | 0                                                                                                                                                                                          | 0 |  |  |  |  |  |  |  |  |  |  |  |  |  |
|         | 0                                            | 0 | 0 | 0 | 0 | 0 | 0 | 0 | 0 | 0 | 0                                                                                                                                                                                                                                                                                                                                                                                                                                                                                                                                                                                                  | 0 | 0 | 0 | 0 | 0 | 0  | 0 | 0 | 0 | 0 | 0 | 0 | 0 | 0 | 0                                                                                                                                                                                          | 0 |  |  |  |  |  |  |  |  |  |  |  |  |  |
|         | 0                                            | 0 | 0 | 0 | 0 | 0 | 0 | 0 | 0 | 0 | 0                                                                                                                                                                                                                                                                                                                                                                                                                                                                                                                                                                                                  | 0 | 0 | 0 | 0 | 0 | 0  | 0 | 0 | 0 | 0 | 0 | 0 | 0 | 0 | 0                                                                                                                                                                                          | 0 |  |  |  |  |  |  |  |  |  |  |  |  |  |
|         | M02255_77_000000000-ADUT3_1_2113_28220_12171 |   |   |   |   |   |   |   |   |   | T---AC---AG-GG-GGT-----GCA-A-G-----C-G--T---T--GC-T-CGG-AA-----TC-A--C-T-GG-GC-----GT--A-----AA-GC-GT-AC-----G-CA-G-G-C-G-----G--A-CC-G-A-T-----AA---G-T-C-G-----G-G-T--G--TG--A-AA-GC--C-C-AG-G-G----CT-C-AA-----C-C-C-T-G-G-A--A-C---T-G--C-A--T-T-----C--GA-A-A--C-----T--G-T--CG--G-T-C---T-T-G-A-G-T-A--C-GG----GA-G-A-----G-G-T-G--AG-T-----GG--A--ATT-----C-T-T-G-GT--GT-A-G-AG-GT--G---A-A-A--TT-C-GT-AG--AT-A-TC--A-G--G-A-A-G-A-AC-A-CC--GG--T--G--GC-GAA-A--G-C-G-----G--C-T-C-A--CTG--G--CC-C-G-----A-T--A-C-T--GA--CG-C-T-C--A-TG--T-A-CG-A--AA-G-C--G-TG--GG-G--AG-C-A-AA-----CA--GG |   |   |   |   |   |    |   |   |   |   |   |   |   |   | Bacteria(100);Proteobacteria(100);unclassified(100);unclassified(100);unclassified(100);unclassified(100);unclassified(100);unclassified(100);unclassified(100);unclassified(100);         |   |  |  |  |  |  |  |  |  |  |  |  |  |  |
| Otu1277 | 0                                            | 0 | 0 | 0 | 0 | 0 | 0 | 0 | 0 | 0 | 0                                                                                                                                                                                                                                                                                                                                                                                                                                                                                                                                                                                                  | 0 | 0 | 0 | 0 | 0 | 0  | 0 | 0 | 0 | 0 | 0 | 0 | 0 | 0 | 0                                                                                                                                                                                          | 0 |  |  |  |  |  |  |  |  |  |  |  |  |  |
|         | 0                                            | 0 | 0 | 0 | 0 | 0 | 0 | 0 | 0 | 0 | 0                                                                                                                                                                                                                                                                                                                                                                                                                                                                                                                                                                                                  | 0 | 0 | 0 | 0 | 0 | 0  | 0 | 0 | 0 | 0 | 0 | 0 | 0 | 0 | 0                                                                                                                                                                                          | 0 |  |  |  |  |  |  |  |  |  |  |  |  |  |
|         | 0                                            | 0 | 0 | 0 | 0 | 0 | 0 | 0 | 0 | 0 | 0                                                                                                                                                                                                                                                                                                                                                                                                                                                                                                                                                                                                  | 0 | 0 | 0 | 0 | 0 | 0  | 0 | 0 | 0 | 0 | 0 | 0 | 0 | 0 | 0                                                                                                                                                                                          | 0 |  |  |  |  |  |  |  |  |  |  |  |  |  |
|         | 0                                            | 0 | 0 | 0 | 0 | 0 | 0 | 0 | 0 | 0 | 0                                                                                                                                                                                                                                                                                                                                                                                                                                                                                                                                                                                                  | 0 | 0 | 0 | 0 | 0 | 0  | 0 | 0 | 0 | 0 | 0 | 0 | 0 | 0 | 0                                                                                                                                                                                          | 0 |  |  |  |  |  |  |  |  |  |  |  |  |  |
|         | M02255_77_000000000-ADUT3_1_1104_13451_20462 |   |   |   |   |   |   |   |   |   | T---AC---GA-AT-GGA-----GCG-A-G-----C-G--T---T--GT-T-CGG-AA-----TC-A--C-T-GG-GC-----GT--A-----AA-GG-GT-GC-----G-CA-G-G-C-G-----G--T-CA-T-G-A-----AA---G-T-T-A-----G-A-A--G--TG--A-AA-TC--C-C-AG-G-G----CT-T-AA-----C-C-T-T-G-G-A--A-T---T-G--C-T---T-T-----T--AA-A-A--C-----T--C-C--AT--G-A-C---T-A-G-A-G-T-A--C-TG----GA-G-A-----G-G-T-T--GG-C-----GG--A--ATT---C--C-G-A-GT--GT-A-G-AG-GT--G---A-A-A--TT-C-GC-AG--AT-A-TT--C-G--G-A-G-G-A-AC-A-CC--AA--T--G--GC-GTA-G--G-C-A-----G--C-C-A-A--CTG--G--AC-A-G-----T-A--A-C-T--GA--CG-C-T-C--A-TG--C-A-CG-A--AA-G-C--G-TG--GG-G--AT-C-A-AA-----CA--GG |   |   |   |   |   |    |   |   |   |   |   |   |   |   | Bacteria(100);Proteobacteria(100);unclassified(100);unclassified(100);unclassified(100);unclassified(100);unclassified(100);unclassified(100);unclassified(100);unclassified(100);         |   |  |  |  |  |  |  |  |  |  |  |  |  |  |
| Otu1278 | 0                                            | 0 | 0 | 0 | 0 | 0 | 0 | 0 | 0 | 0 | 0                                                                                                                                                                                                                                                                                                                                                                                                                                                                                                                                                                                                  | 0 | 0 | 0 | 0 | 0 | 0  | 0 | 0 | 0 | 0 | 0 | 0 | 0 | 0 | 0                                                                                                                                                                                          | 0 |  |  |  |  |  |  |  |  |  |  |  |  |  |
|         | 0                                            | 0 | 0 | 0 | 0 | 0 | 0 | 0 | 0 | 0 | 0                                                                                                                                                                                                                                                                                                                                                                                                                                                                                                                                                                                                  | 0 | 0 | 0 | 0 | 0 | 0  | 0 | 0 | 0 | 0 | 0 | 0 | 0 | 0 | 0                                                                                                                                                                                          | 0 |  |  |  |  |  |  |  |  |  |  |  |  |  |
|         | 0                                            | 0 | 0 | 0 | 0 | 0 | 0 | 0 | 0 | 0 | 0                                                                                                                                                                                                                                                                                                                                                                                                                                                                                                                                                                                                  | 0 | 0 | 0 | 0 | 0 | 0  | 0 | 0 | 0 | 0 | 0 | 0 | 0 | 0 | 0                                                                                                                                                                                          | 0 |  |  |  |  |  |  |  |  |  |  |  |  |  |
|         | 0                                            | 0 | 0 | 0 | 0 | 0 | 0 | 0 | 0 | 0 | 0                                                                                                                                                                                                                                                                                                                                                                                                                                                                                                                                                                                                  | 0 | 0 | 0 | 0 | 0 | 19 | 0 | 0 | 0 | 0 | 0 | 0 | 0 | 0 | 0                                                                                                                                                                                          | 0 |  |  |  |  |  |  |  |  |  |  |  |  |  |
|         | M02255_77_000000000-ADUT3_1_                 |   |   |   |   |   |   |   |   |   |                                                                                                                                                                                                                                                                                                                                                                                                                                                                                                                                                                                                    |   |   |   |   |   |    |   |   |   |   |   |   |   |   |                                                                                                                                                                                            |   |  |  |  |  |  |  |  |  |  |  |  |  |  |



|         |                                                                                                                                                                                                                             |   |   |   |   |   |   |   |   |   |   |   |   |   |   |   |   |   |   |   |   |    |   |   |   |   |   |  |
|---------|-----------------------------------------------------------------------------------------------------------------------------------------------------------------------------------------------------------------------------|---|---|---|---|---|---|---|---|---|---|---|---|---|---|---|---|---|---|---|---|----|---|---|---|---|---|--|
| Otu1280 | 0                                                                                                                                                                                                                           | 0 | 0 | 0 | 0 | 0 | 0 | 0 | 0 | 0 | 0 | 0 | 0 | 0 | 0 | 0 | 0 | 0 | 0 | 0 | 0 | 0  | 0 | 0 | 0 | 0 | 0 |  |
|         | 0                                                                                                                                                                                                                           | 0 | 0 | 0 | 0 | 0 | 0 | 0 | 0 | 0 | 0 | 0 | 0 | 0 | 0 | 0 | 0 | 0 | 0 | 0 | 0 | 0  | 0 | 0 | 0 | 0 | 0 |  |
|         | 0                                                                                                                                                                                                                           | 0 | 0 | 0 | 0 | 0 | 0 | 0 | 0 | 0 | 0 | 0 | 0 | 0 | 0 | 0 | 0 | 0 | 0 | 0 | 0 | 0  | 0 | 0 | 0 | 0 | 0 |  |
|         | 0                                                                                                                                                                                                                           | 0 | 0 | 0 | 0 | 0 | 0 | 0 | 0 | 0 | 0 | 0 | 0 | 0 | 0 | 0 | 0 | 0 | 0 | 0 | 0 | 9  | 0 | 0 | 0 | 0 |   |  |
|         | M02255_76_000000000-ADUNE_1_2111_14859_19479 T---A---AC-TC-CGT-----GCC-A-G-----C-A-G--C--CG-C-GGT-AA-----TA-C--G-G--AG-GG-----TG--C----AA-GC-GT-TA-----T-CC-G-G--A-----T--T-CT-T---T-----                                   |   |   |   |   |   |   |   |   |   |   |   |   |   |   |   |   |   |   |   |   |    |   |   |   |   |   |  |
|         | --AA---G-T-C-A-----G-A-G--G--TG--A-AA-TC--C-T-GC-A-G-----CT-C-AA-----C-T-G-C-A-G-A--A-C---T-G--C-C---T--T-----T--GA-T-A--C-----T-G-G--AA--A-T-C---T-T-G-A-G-T--T---T-AG-----TT-G-A-----A-G-T-G--GG-C-----GG--A--ATA---T-G-  |   |   |   |   |   |   |   |   |   |   |   |   |   |   |   |   |   |   |   |   |    |   |   |   |   |   |  |
|         | A-C-AT--GT-A-G-CG-GT--G---A-A-A---TG-C-AT-AG--AT-A-TG--T-C--A-T-A-G-A-AC-A-CC--GA--T--A--GC-GAA-G--G-C-A-----G--C-T-C-A---CTA--A--AC-T-T-----G-A--A-C-T--GA--CA-C-T-G--A-TG--T-A-CG-A--AA-G-C---G-TG--GG-G--                |   |   |   |   |   |   |   |   |   |   |   |   |   |   |   |   |   |   |   |   |    |   |   |   |   |   |  |
|         | AG-C-G-AA-----CA--GG Bacteria(100);Bacteroidetes(100);unclassified(100);unclassified(100);unclassified(100);unclassified(100);unclassified(100);unclassified(100);unclassified(100);                                        |   |   |   |   |   |   |   |   |   |   |   |   |   |   |   |   |   |   |   |   |    |   |   |   |   |   |  |
| Otu1281 | 0                                                                                                                                                                                                                           | 0 | 0 | 0 | 0 | 0 | 0 | 0 | 0 | 0 | 0 | 0 | 0 | 0 | 0 | 0 | 0 | 0 | 0 | 0 | 0 | 0  | 0 | 0 | 0 | 0 | 0 |  |
|         | 0                                                                                                                                                                                                                           | 0 | 0 | 0 | 0 | 0 | 0 | 0 | 0 | 0 | 0 | 0 | 0 | 0 | 0 | 0 | 0 | 0 | 0 | 0 | 0 | 0  | 0 | 0 | 0 | 0 | 0 |  |
|         | 0                                                                                                                                                                                                                           | 0 | 0 | 0 | 0 | 0 | 0 | 0 | 0 | 0 | 0 | 0 | 0 | 0 | 0 | 0 | 0 | 0 | 0 | 0 | 0 | 0  | 0 | 0 | 0 | 0 | 0 |  |
|         | 0                                                                                                                                                                                                                           | 0 | 0 | 0 | 0 | 0 | 0 | 0 | 0 | 0 | 0 | 0 | 0 | 0 | 0 | 0 | 0 | 0 | 0 | 0 | 0 | 7  | 0 | 0 | 0 | 0 |   |  |
|         | M02255_77_000000000-ADUT3_1_2113_24120_11194 T---AC--GT-AG-GGT-----GCA-A-G-----C-G--T--T--GT-C-CGG-AT-----TT-A--T-T--GG-GC-----GT--A---AA-GA-GC-TC-----G-TA-G-G-C-G-----G--T-TT-G-T-C-----                                  |   |   |   |   |   |   |   |   |   |   |   |   |   |   |   |   |   |   |   |   |    |   |   |   |   |   |  |
|         | ----AC---G-T-C-G-----G-C-T-G--TG--A-AA-AT--C-C-GG-G-G-----CT-C-AA-----C-C-C-G-G-A--C-C---T-G--C-A--G--T-----C--GA-T-A--C-----G--G-G--CA--G-A-C---T-A-G-A-G-T--T---C-GG-----CA-G-G-----G-G-A-G--AC-T-----GG--A--ATT---C-     |   |   |   |   |   |   |   |   |   |   |   |   |   |   |   |   |   |   |   |   |    |   |   |   |   |   |  |
|         | C-T-G-GT--GT-A-G-CG-GT--G---A-A-A---TG-C-GC-AG--AT-A-TC--A-G--G-A-G-G-A-AC-A-CC--GG--T--G--GC-GAA-G--G-C-G-----G--G-T-C-T---CTG--G--GC-C-G-----A-A--A-C-T--GA--CG-C-T-G--A-GG--A-G-CG-A--AA-G-C---G-TG--GG-                 |   |   |   |   |   |   |   |   |   |   |   |   |   |   |   |   |   |   |   |   |    |   |   |   |   |   |  |
|         | G--AG-C-A-AA-----CA--GG Bacteria(100);Actinobacteria(100);Actinobacteria(100);Actinobacteridae(100);Actinomycetales(100);unclassified(100);unclassified(100);unclassified(100);unclassified(100);                           |   |   |   |   |   |   |   |   |   |   |   |   |   |   |   |   |   |   |   |   |    |   |   |   |   |   |  |
| Otu1282 | 0                                                                                                                                                                                                                           | 0 | 0 | 0 | 0 | 0 | 0 | 0 | 0 | 0 | 0 | 0 | 0 | 0 | 0 | 0 | 0 | 0 | 0 | 0 | 0 | 0  | 0 | 0 | 0 | 0 | 0 |  |
|         | 0                                                                                                                                                                                                                           | 0 | 0 | 0 | 0 | 0 | 0 | 0 | 0 | 0 | 0 | 0 | 0 | 0 | 0 | 0 | 0 | 0 | 0 | 0 | 0 | 0  | 0 | 0 | 0 | 0 | 0 |  |
|         | 0                                                                                                                                                                                                                           | 0 | 0 | 0 | 0 | 0 | 0 | 0 | 0 | 0 | 0 | 0 | 0 | 0 | 0 | 0 | 0 | 0 | 0 | 0 | 0 | 0  | 0 | 0 | 0 | 0 | 0 |  |
|         | 0                                                                                                                                                                                                                           | 0 | 0 | 0 | 0 | 0 | 0 | 0 | 0 | 0 | 0 | 0 | 0 | 0 | 0 | 0 | 0 | 0 | 0 | 0 | 0 | 33 | 0 | 0 | 0 | 0 |   |  |
|         | M02255_77_000000000-ADUT3_1_1109_8107_19829 T---AC--GT-AG-GCA-----GCG-A-G-----C-G--T--T--GT-T-CGG-AA-----TT-A--C-T--GG-GC-----GT--A---AA-GA-GT-GT-----G-TA-G-G-C-G-----G--T-GC-T-C-T-----AA-                                |   |   |   |   |   |   |   |   |   |   |   |   |   |   |   |   |   |   |   |   |    |   |   |   |   |   |  |
|         | --G-T-T-C-----G-G-T--G--TG--A-AA-TC--T-C-CT-G-G-----CT-C-AA-----C-T-G-G-G-A-G--G-G---T-G--C-G---C-C-----G--GA-A-A--C-----T--G-G--AA--T-G-C---T-T-G-A-G-C--G---T-GG-----GA-G-A-----G-G-A-A--AG-C-----GG--A--ATT---C-C-T-G-   |   |   |   |   |   |   |   |   |   |   |   |   |   |   |   |   |   |   |   |   |    |   |   |   |   |   |  |
|         | GT--GT-A-G-CG-GT--G---A-A-A---TG-C-GT-AG--AT-A-TC--A-G--G-A-G-G-A-AC-A-CC--TG--T--G--GT-GTA-G--A-C--G-----G--C-T-T-T---CTG--G--AC-C-A-----T-A--G-C-T--GA--CG-C-T-G--A-GA--C-A-CG-A--AA-G-C---G-TG--GG-T--AG-C-              |   |   |   |   |   |   |   |   |   |   |   |   |   |   |   |   |   |   |   |   |    |   |   |   |   |   |  |
|         | A-AA-----CA--GG Bacteria(100);unclassified(100);unclassified(100);unclassified(100);unclassified(100);unclassified(100);unclassified(100);unclassified(100);unclassified(100);                                              |   |   |   |   |   |   |   |   |   |   |   |   |   |   |   |   |   |   |   |   |    |   |   |   |   |   |  |
| Otu1283 | 0                                                                                                                                                                                                                           | 0 | 0 | 0 | 0 | 0 | 0 | 0 | 0 | 0 | 0 | 0 | 0 | 0 | 0 | 0 | 0 | 0 | 0 | 0 | 0 | 0  | 0 | 0 | 0 | 0 | 0 |  |
|         | 0                                                                                                                                                                                                                           | 0 | 0 | 0 | 0 | 0 | 0 | 0 | 0 | 0 | 0 | 0 | 0 | 0 | 0 | 0 | 0 | 0 | 0 | 0 | 0 | 0  | 0 | 0 | 0 | 0 | 0 |  |
|         | 0                                                                                                                                                                                                                           | 0 | 0 | 0 | 0 | 0 | 0 | 0 | 0 | 0 | 0 | 0 | 0 | 0 | 0 | 0 | 0 | 0 | 0 | 0 | 0 | 0  | 0 | 0 | 0 | 0 | 0 |  |
|         | 0                                                                                                                                                                                                                           | 0 | 0 | 0 | 0 | 0 | 0 | 0 | 0 | 0 | 0 | 0 | 0 | 0 | 0 | 0 | 0 | 0 | 0 | 0 | 0 | 7  | 0 | 0 | 0 | 0 |   |  |
|         | M02255_77_000000000-ADUT3_1_1107_26687_10542 C---GG--CT-AA-CTA-----CG-T-G-----C-C-A--G--CA-G-CCG-CG-----GT-A--A-T--AC-GT-----AG--G----GA-GC-GA-GC-----GTTA-T-C-C-G-----G--A-TT-T-A-T-----                                   |   |   |   |   |   |   |   |   |   |   |   |   |   |   |   |   |   |   |   |   |    |   |   |   |   |   |  |
|         | ----AA---G-T-C-G-----G-T-G--G--TC--T-AA-GT--C-C-GA-A-G-----CT-T-AA-----C-T-T-C-G-G-T--T-----C-G--C-C---A-T-----T--GA-A-A--C-----T--G-T--AG--A-G-C---T-T-G-A-G-T--A--T-GG-----AA-G-A-----G-G-T-A--AG-T-----GG--A--ATT---T-C- |   |   |   |   |   |   |   |   |   |   |   |   |   |   |   |   |   |   |   |   |    |   |   |   |   |   |  |
|         | T-A-GT--GT-A-G-CG-GT--T---A-A-A---TA-C-GT-AG--AT-A-TT--A-G--A-A-G-G-A-AC-A-CC--AG--T--G--GC-GAA-A--G-C-G-----A-C-T-T-A---CTG--G--TC-C-A-----C-T--A-C-T--GA--CG-C-T-G--A-GG--C-A-CG-A--AA-G-C---G-TG--GG-G--                 |   |   |   |   |   |   |   |   |   |   |   |   |   |   |   |   |   |   |   |   |    |   |   |   |   |   |  |
|         | AG-C-A-AA-----TA--GG Bacteria(100);Firmicutes(100);Mollicutes(100);RF9(100);unclassified(100);unclassified(100);unclassified(100);unclassified(100);unclassified(100);                                                      |   |   |   |   |   |   |   |   |   |   |   |   |   |   |   |   |   |   |   |   |    |   |   |   |   |   |  |
| Otu1284 | 0                                                                                                                                                                                                                           | 0 | 0 | 0 | 0 | 0 | 0 | 0 | 0 | 0 | 0 | 0 | 0 | 0 | 0 | 0 | 0 | 0 | 0 | 0 | 0 | 0  | 0 | 0 | 0 | 0 | 0 |  |
|         | 0                                                                                                                                                                                                                           | 0 | 0 | 0 | 0 | 0 | 0 | 0 | 0 | 0 | 0 | 0 | 0 | 0 | 0 | 0 | 0 | 0 | 0 | 0 | 0 | 0  | 0 | 0 | 0 | 0 | 0 |  |
|         | 0                                                                                                                                                                                                                           | 0 | 0 | 0 | 0 | 0 | 0 | 0 | 0 | 0 | 0 | 0 | 0 | 0 | 0 | 0 | 0 | 0 | 0 | 0 | 0 | 0  | 0 | 0 | 0 | 0 | 0 |  |
|         | 0                                                                                                                                                                                                                           | 0 | 0 | 0 | 0 | 0 | 0 | 0 | 0 | 0 | 0 | 0 | 0 | 0 | 0 | 0 | 0 | 0 | 0 | 0 | 0 | 48 | 0 | 0 | 0 | 0 |   |  |
|         | M02255_77_000000000-ADUT3_1_1102_10182_13778 G---AC---GA-GG-GAT-----CCT-A-G-----C-G--T--T--GT-T-CGG-AA-----TC-A--T-T--GG-GC-----GT--A---AA-GC-GG-GT-----G-TA-G-G-T-G-----G--C-TT-T-G-T-----                                 |   |   |   |   |   |   |   |   |   |   |   |   |   |   |   |   |   |   |   |   |    |   |   |   |   |   |  |
|         | ----AA---G-T-C-G-----A-G-T--G--TG--A-AA-GC--C-T-GG-G-G-----CT-C-AA-----C-C-C-C-A-G-A--A-G---T-G--C-A--T--T-----C--GA-T-A--C-----T--G-C--GA--A-G-C---T-T-G-A-G-T--G---C-CG-----GA-G-A-----G-G-T-T---AG-T-----AG--A--ATT---   |   |   |   |   |   |   |   |   |   |   |   |   |   |   |   |   |   |   |   |   |    |   |   |   |   |   |  |
|         | G-T-T-G-GT--GT-A-G-TG-GT--G---A-A-A---TA-C-GT-AG--AT-A-TC--A-A--C-A-G-G-A-AT-A-CC--GG--A--G--GC-GAA-G--G-C-G-----G--C-T-A-A---CTG--G--CC-G-G-----A-C---A-C-T--GA--CA-C-T-G--A-GA--C-C-CG-A--AA-G-C---G-TG--                 |   |   |   |   |   |   |   |   |   |   |   |   |   |   |   |   |   |   |   |   |    |   |   |   |   |   |  |
|         | GG-G--AT-C-A-AA-----CA--GG Bacteria(100);Proteobacteria(100);Deltaproteobacteria(100);Bdellovibrionales(100);Bdellovibrionaceae(100);Bdellovibrio(100);unclassified(100);unclassified(100);unclassified(100);               |   |   |   |   |   |   |   |   |   |   |   |   |   |   |   |   |   |   |   |   |    |   |   |   |   |   |  |



|         |                                                                                                                                                                                                                         |   |   |   |   |   |   |   |   |   |   |   |   |   |   |   |   |   |   |   |    |   |   |    |   |   |   |  |
|---------|-------------------------------------------------------------------------------------------------------------------------------------------------------------------------------------------------------------------------|---|---|---|---|---|---|---|---|---|---|---|---|---|---|---|---|---|---|---|----|---|---|----|---|---|---|--|
| Otu1285 | 0                                                                                                                                                                                                                       | 0 | 0 | 0 | 0 | 0 | 0 | 0 | 0 | 0 | 0 | 0 | 0 | 0 | 0 | 0 | 0 | 0 | 0 | 0 | 0  | 0 | 0 | 0  | 0 | 0 | 0 |  |
|         | 0                                                                                                                                                                                                                       | 0 | 0 | 0 | 0 | 0 | 0 | 0 | 0 | 0 | 0 | 0 | 0 | 0 | 0 | 0 | 0 | 0 | 0 | 0 | 0  | 0 | 0 | 0  | 0 | 0 | 0 |  |
|         | 0                                                                                                                                                                                                                       | 0 | 0 | 0 | 0 | 0 | 0 | 0 | 0 | 0 | 0 | 0 | 0 | 0 | 0 | 0 | 0 | 0 | 0 | 0 | 0  | 0 | 0 | 0  | 0 | 0 | 0 |  |
|         | 0                                                                                                                                                                                                                       | 0 | 0 | 0 | 0 | 0 | 0 | 0 | 0 | 0 | 0 | 0 | 0 | 0 | 0 | 0 | 0 | 0 | 0 | 0 | 0  | 8 | 0 | 0  | 0 | 0 |   |  |
|         | M02255_76_000000000-ADUNE_1_2111_14262_22103 GT---TC---GT-GCCAGC-----AGC-C-G-----C--G--G---T-AA-G-ACG-AA-----CC-G--T-G--CG-AA-----CG--T----TA-TT-CG-GA-----A-TC-A-C-T-G-----G--C-CC-G-G-C----                           |   |   |   |   |   |   |   |   |   |   |   |   |   |   |   |   |   |   |   |    |   |   |    |   |   |   |  |
|         | -----GC---G-T-C-C-----TTC-G--C--TG--A-AA-GC--C-C-CC-G-G----CT-C-AA-----C-C-G-G-G-G-A--A-G---T-G--G-C---G-G-----G-GA-T-A--C-----G--G-C--CG--G-G-C---T-C-G-A-G-G--G--G-GG----TA-G-G-----G-G-G-A--GC-C-----GG--A--ACT-     |   |   |   |   |   |   |   |   |   |   |   |   |   |   |   |   |   |   |   |    |   |   |    |   |   |   |  |
|         | ---C-A-C-G-GT--GG-A-G-CG-GT--G---A--A---TG-C-GT-TG--AG-A-TC--G-T--G-A-G-G-A-AC-G-CC---CG--T--G--GC-GAA-A--G-C--G-----G--G-C-T-C---CTG--G--GC-C-C-----C-G---C-C-T--GA--CG-C-T-G--A-GA--C-G-CG-A--AA-G-C---C-AG--         |   |   |   |   |   |   |   |   |   |   |   |   |   |   |   |   |   |   |   |    |   |   |    |   |   |   |  |
|         | GG-G--AG-C-G-AA-----CG--GG Bacteria(100);Planctomycetes(100);Planctomycetacia(100);Planctomycetales(100);Planctomycetaceae(100);Singulisphaera(100);unclassified(100);unclassified(100);unclassified(100);              |   |   |   |   |   |   |   |   |   |   |   |   |   |   |   |   |   |   |   |    |   |   |    |   |   |   |  |
| Otu1286 | 0                                                                                                                                                                                                                       | 0 | 0 | 0 | 0 | 0 | 0 | 0 | 0 | 0 | 0 | 0 | 0 | 0 | 0 | 0 | 0 | 0 | 0 | 0 | 0  | 0 | 0 | 0  | 0 | 0 | 0 |  |
|         | 0                                                                                                                                                                                                                       | 0 | 0 | 0 | 0 | 0 | 0 | 0 | 0 | 0 | 0 | 0 | 0 | 0 | 0 | 0 | 0 | 0 | 0 | 0 | 0  | 0 | 0 | 0  | 0 | 0 | 0 |  |
|         | 0                                                                                                                                                                                                                       | 0 | 0 | 0 | 0 | 0 | 0 | 0 | 0 | 0 | 0 | 0 | 0 | 0 | 0 | 0 | 0 | 0 | 0 | 0 | 0  | 0 | 0 | 0  | 0 | 0 | 0 |  |
|         | 0                                                                                                                                                                                                                       | 0 | 0 | 0 | 0 | 0 | 0 | 0 | 0 | 0 | 0 | 0 | 0 | 0 | 0 | 0 | 0 | 0 | 0 | 0 | 12 | 0 | 0 | 0  | 0 | 0 |   |  |
|         | M02255_76_000000000-ADUNE_1_2106_17927_23565 C---TA--AC-TC-CGT-----GCC-A-G-----C--A--G---C--CG-C-GGT-AA-----TA-C--G-G--AG-GG-----TG--C---AA-GC-GT-----TA-T-C-C-G-----G--A-CT-T-G-T-----                                 |   |   |   |   |   |   |   |   |   |   |   |   |   |   |   |   |   |   |   |    |   |   |    |   |   |   |  |
|         | --TA---G-T-C-A-----G-T-G--G--TG--A-AA-TC--T-C-AT-A-G----CT-T-AA-----C-T-A-T-G-A-A--A-C---T-G--C-C---A-T-----T-GA-T-A--C-----T-G-C--AG--G-T-C---T-T-G-A-G-T--A--A-AT---TT-G-A-----A-G-T-G---GC-T---GG--A--ATA---A-G-T-   |   |   |   |   |   |   |   |   |   |   |   |   |   |   |   |   |   |   |   |    |   |   |    |   |   |   |  |
|         | A-GT--GT-A-G-CG-GT--G---A--A---TG-C-AT-AG--AT-A-TT--A-C--T-T-A-G-A-AC-A-CC---AA--T--T--GC-GAA-G--G-C--A-----G--G-T-C-A---CTA--A--GA-T-T-----T-A--A-C-T--GA--CG-C-T-G--A-TG--G-A-CG-A--AA-G-C---G-TG--GG-G--AG-          |   |   |   |   |   |   |   |   |   |   |   |   |   |   |   |   |   |   |   |    |   |   |    |   |   |   |  |
|         | C-G-AA-----CA--GG Bacteria(100);Bacteroidetes(100);Flavobacteria(100);Flavobacteriales(100);Flavobacteriaceae(100);Candidatus_Amoebinatus(100);unclassified(100);unclassified(100);unclassified(100);                   |   |   |   |   |   |   |   |   |   |   |   |   |   |   |   |   |   |   |   |    |   |   |    |   |   |   |  |
| Otu1287 | 0                                                                                                                                                                                                                       | 0 | 0 | 0 | 0 | 0 | 0 | 0 | 0 | 0 | 0 | 0 | 0 | 0 | 0 | 0 | 0 | 0 | 0 | 0 | 0  | 0 | 0 | 0  | 0 | 0 | 0 |  |
|         | 0                                                                                                                                                                                                                       | 0 | 0 | 0 | 0 | 0 | 0 | 0 | 0 | 0 | 0 | 0 | 0 | 0 | 0 | 0 | 0 | 0 | 0 | 0 | 0  | 0 | 0 | 0  | 0 | 0 | 0 |  |
|         | 0                                                                                                                                                                                                                       | 0 | 0 | 0 | 0 | 0 | 0 | 0 | 0 | 0 | 0 | 0 | 0 | 0 | 0 | 0 | 0 | 0 | 0 | 0 | 0  | 0 | 0 | 0  | 0 | 0 | 0 |  |
|         | 0                                                                                                                                                                                                                       | 0 | 0 | 0 | 0 | 0 | 0 | 0 | 0 | 0 | 0 | 0 | 0 | 0 | 0 | 0 | 0 | 0 | 0 | 0 | 9  | 0 | 0 | 0  | 0 | 0 |   |  |
|         | M02255_76_000000000-ADUNE_1_2105_22601_15535 T---AA--CT-A--CGT-----GCC-A-G-----C--A--G---C--CG-C-GGT-AA-----TA-C--G-T--AG-GG-----GG--C---AA-GC-G--TT-----G-TC-C-G---G-----A--T-TT-A-T-T-----                            |   |   |   |   |   |   |   |   |   |   |   |   |   |   |   |   |   |   |   |    |   |   |    |   |   |   |  |
|         | --AA---G-T-C-T-----G-A-T--G--TG--A-AA-GC--C-C-AC-G-G----CT-C-AA-----C-C-G-T-G-G-A--G-----G-GC-C-A---T--T-----G--GA-A-A--C-----T-G-G--TA--G-G-C---T-T-G-A-G-T--G---C-AG---GA-G-A-----G-G-A-G--AG-C-----GG--A--ATT---C-   |   |   |   |   |   |   |   |   |   |   |   |   |   |   |   |   |   |   |   |    |   |   |    |   |   |   |  |
|         | C-C-G-GT--GT-A-G-CG-GT--G---A--A---TG-C-GT-AG--AT-A-TC--G-G--G-A-G-G-A-AC-A-CC---CG--T--G--GC-GAA-G--G-C--G-----G--C-T-C-T---CTG--G--CC-T-G-----T-A---A-C-T--GA--CG-C-T-G--A-GG--C-G-CG-A--AA-G-C---G-TG--GG-           |   |   |   |   |   |   |   |   |   |   |   |   |   |   |   |   |   |   |   |    |   |   |    |   |   |   |  |
|         | G--AG-C-A-AA-----CA--GG Bacteria(100);Firmicutes(100);Bacilli(100);Bacillales(100);Paenibacillaceae(100);Ammoniphilus(100);unclassified(100);unclassified(100);unclassified(100);                                       |   |   |   |   |   |   |   |   |   |   |   |   |   |   |   |   |   |   |   |    |   |   |    |   |   |   |  |
| Otu1288 | 0                                                                                                                                                                                                                       | 0 | 0 | 0 | 0 | 0 | 0 | 0 | 0 | 0 | 0 | 0 | 0 | 0 | 0 | 0 | 0 | 0 | 0 | 0 | 0  | 0 | 0 | 0  | 0 | 0 | 0 |  |
|         | 0                                                                                                                                                                                                                       | 0 | 0 | 0 | 0 | 0 | 0 | 0 | 0 | 0 | 0 | 0 | 0 | 0 | 0 | 0 | 0 | 0 | 0 | 0 | 0  | 0 | 0 | 0  | 0 | 0 | 0 |  |
|         | 0                                                                                                                                                                                                                       | 0 | 0 | 0 | 0 | 0 | 0 | 0 | 0 | 0 | 0 | 0 | 0 | 0 | 0 | 0 | 0 | 0 | 0 | 0 | 0  | 0 | 0 | 0  | 0 | 0 | 0 |  |
|         | 0                                                                                                                                                                                                                       | 0 | 0 | 0 | 0 | 0 | 0 | 0 | 0 | 0 | 0 | 0 | 0 | 0 | 0 | 0 | 0 | 0 | 0 | 0 | 43 | 0 | 0 | 34 | 0 | 0 |   |  |
|         | M02255_77_000000000-ADUT3_1_2104_16088_20785 T---AC--GT-AG-GGG-----GCA-A-G-----C--G--T---T--AT-C-CGG-AT-----TT-A--C-T--GG-GT-----GT--A---AA-GG-GA-GC-----G-TA-G-G-T-G-----G--T-AT-G-G-C----                             |   |   |   |   |   |   |   |   |   |   |   |   |   |   |   |   |   |   |   |    |   |   |    |   |   |   |  |
|         | -----AA---G-T-C-A-----G-A-G--G--TG--A-AA-AC--C-C-AG-G-G----CT-T-AA-----C-C-T-T-G-G-G--A-T---T-G--C-C---T--T-----T--GA-A-A--C-----T--G-T--CA--G-A-C---T-A-G-A-G-T--G---C-AG---GA-G-G-----G-G-T-A--AG-T-----GG--A--ATT--- |   |   |   |   |   |   |   |   |   |   |   |   |   |   |   |   |   |   |   |    |   |   |    |   |   |   |  |
|         | C-C-T-A-GT--GT-A-G-CG-GT--G---A--A---TG-C-GT-AG--AT-A-TT--A-G--G-A-G-G-A-AC-A-CC---AG--T--G--GC-GAA-G--G-C--G-----G--C-T-T-A---CTG--G--AC-T-G-----T-A---A-C-T--GA--CA-C-T-G--A-GG--C-T-CG-A--AA-G-C---G-TG--GG-         |   |   |   |   |   |   |   |   |   |   |   |   |   |   |   |   |   |   |   |    |   |   |    |   |   |   |  |
|         | G--AG-C-A-AA-----CA--GG Bacteria(100);Firmicutes(100);Clostridia(100);Clostridiales(100);unclassified(100);unclassified(100);unclassified(100);unclassified(100);unclassified(100);                                     |   |   |   |   |   |   |   |   |   |   |   |   |   |   |   |   |   |   |   |    |   |   |    |   |   |   |  |
| Otu1289 | 0                                                                                                                                                                                                                       | 0 | 0 | 0 | 0 | 0 | 0 | 0 | 0 | 0 | 0 | 0 | 0 | 0 | 0 | 0 | 0 | 0 | 0 | 0 | 0  | 0 | 0 | 0  | 0 | 0 | 0 |  |
|         | 0                                                                                                                                                                                                                       | 0 | 0 | 0 | 0 | 0 | 0 | 0 | 0 | 0 | 0 | 0 | 0 | 0 | 0 | 0 | 0 | 0 | 0 | 0 | 0  | 0 | 0 | 0  | 0 | 0 | 0 |  |
|         | 0                                                                                                                                                                                                                       | 0 | 0 | 0 | 0 | 0 | 0 | 0 | 0 | 0 | 0 | 0 | 0 | 0 | 0 | 0 | 0 | 0 | 0 | 0 | 0  | 0 | 0 | 0  | 0 | 0 | 0 |  |
|         | 0                                                                                                                                                                                                                       | 0 | 0 | 0 | 0 | 0 | 0 | 0 | 0 | 0 | 0 | 0 | 0 | 0 | 0 | 0 | 0 | 0 | 0 | 0 | 56 | 0 | 0 | 0  | 0 | 0 |   |  |
|         | M02255_77_000000000-ADUT3_1_1117_10863_20771 T---AC--GT-AG-GGT-----GCG-A-G-----C--G--T---T--GT-C-CGG-AA-----TT-A--T-T--GG-GC-----GT--A---AA-GA-GC-TC-----G-TA-G-G-C-G-----G--T-TT-G-T-T-----                            |   |   |   |   |   |   |   |   |   |   |   |   |   |   |   |   |   |   |   |    |   |   |    |   |   |   |  |
|         | ----GC---G-C-C-T-----G-C-T--G--TG--A-AA-AC--C-T-GG-G-G----CT-T-AA-----C-T-T-T-G-G-G--A-T---T-G--C-A---G-T-----G--GG-T-A--C-----G--G-G--CA--G-A-C---T-A-G-A-G-T--G---T-GG---TA-G-G-----G-G-T-A--AT-T-----GG--A--ATT---C- |   |   |   |   |   |   |   |   |   |   |   |   |   |   |   |   |   |   |   |    |   |   |    |   |   |   |  |
|         | C-T-G-GT--GT-A-G-CG-GT--G---G--A-A---TG-C-GC-AG--AT-A-TC--A-G--G-A-G-G-A-AC-A-CC---GA--T--G--GC-GAA-G--G-C--A-----G--G-T-T-A---CTG--G--GC-C-A-----C-C---A-C-T--GA--CG-C-T-G--A-GG--A-G-CG-A--AA-G-C---G-TG--GG-         |   |   |   |   |   |   |   |   |   |   |   |   |   |   |   |   |   |   |   |    |   |   |    |   |   |   |  |
|         | T--AG-C-G-AA-----CA--GG Bacteria(100);Actinobacteria(100);Actinobacteria(100);Actinobacteridae(100);Actinomycetales(100);unclassified(100);unclassified(100);unclassified(100);unclassified(100);                       |   |   |   |   |   |   |   |   |   |   |   |   |   |   |   |   |   |   |   |    |   |   |    |   |   |   |  |



|                                                                                                                                                                                                                                                                                                                                                                                                                                                                                                                                                                                                                                        |   |   |   |   |   |   |   |   |   |   |   |   |   |   |   |   |   |   |   |   |   |    |   |   |   |   |   |
|----------------------------------------------------------------------------------------------------------------------------------------------------------------------------------------------------------------------------------------------------------------------------------------------------------------------------------------------------------------------------------------------------------------------------------------------------------------------------------------------------------------------------------------------------------------------------------------------------------------------------------------|---|---|---|---|---|---|---|---|---|---|---|---|---|---|---|---|---|---|---|---|---|----|---|---|---|---|---|
| Otu1290                                                                                                                                                                                                                                                                                                                                                                                                                                                                                                                                                                                                                                | 0 | 0 | 0 | 0 | 0 | 0 | 0 | 0 | 0 | 0 | 0 | 0 | 0 | 0 | 0 | 0 | 0 | 0 | 0 | 0 | 0 | 0  | 0 | 0 | 0 | 0 | 0 |
|                                                                                                                                                                                                                                                                                                                                                                                                                                                                                                                                                                                                                                        | 0 | 0 | 0 | 0 | 0 | 0 | 0 | 0 | 0 | 0 | 0 | 0 | 0 | 0 | 0 | 0 | 0 | 0 | 0 | 0 | 0 | 0  | 0 | 0 | 0 | 0 | 0 |
|                                                                                                                                                                                                                                                                                                                                                                                                                                                                                                                                                                                                                                        | 0 | 0 | 0 | 0 | 0 | 0 | 0 | 0 | 0 | 0 | 0 | 0 | 0 | 0 | 0 | 0 | 0 | 0 | 0 | 0 | 0 | 0  | 0 | 0 | 0 | 0 | 0 |
|                                                                                                                                                                                                                                                                                                                                                                                                                                                                                                                                                                                                                                        | 0 | 0 | 0 | 0 | 0 | 0 | 0 | 0 | 0 | 0 | 0 | 0 | 0 | 0 | 0 | 0 | 0 | 0 | 0 | 0 | 0 | 11 | 0 | 0 | 0 | 0 | 0 |
| M02255_77_000000000-ADUT3_1_1115_7693_19807 C---GG---CT-AA-CT-----ACG-T-G-----C-C-A--G--CA-G-CCG-CG-----GT-A--A-T-AC-GT-----AG-G---TG-GC-AA-GC-----G-TT-G-T-C-C-----G---GA-T-T-T-----A---T-T-C-T-----G-A-T--G--TG--A-AA-GC--C-C-CC-G-G-----CT-C-AA-----C-C-G-G-G-G-A-G-----G-GT-C-A--T-T-----G--GA-A-A--C-----T--G-G--CG--A-A-C---T-T-G-A-G-T-G---C-AG---AA-G-A-----G-G-A-G--AG-T-----GG--A--ATT---C-C-A-T-GT--GT-A-G-CG-GT--G--A-A-A--TG-C-GT-AG--AT-A-TA--T-G--G-A-G-G-A-AC-A-CC--AG--T--G--GC-GAA-G--G-C-G-----G--C-T-C-T---CTG--G--TC-T-G-----T-A--A-C-T-GA--CG-C-T-G--A-GG--C-T-CG-A--AA-G-C--G-TG--GG-T--AG-C-A-AA-----CA--GG    |   |   |   |   |   |   |   |   |   |   |   |   |   |   |   |   |   |   |   |   |   |    |   |   |   |   |   |
| Bacteria(100);Firmicutes(100);Bacilli(100);Lactobacillales(100);unclassified(100);unclassified(100);unclassified(100);unclassified(100);unclassified(100);                                                                                                                                                                                                                                                                                                                                                                                                                                                                             |   |   |   |   |   |   |   |   |   |   |   |   |   |   |   |   |   |   |   |   |   |    |   |   |   |   |   |
| Otu1291                                                                                                                                                                                                                                                                                                                                                                                                                                                                                                                                                                                                                                | 0 | 0 | 0 | 0 | 0 | 0 | 0 | 0 | 0 | 0 | 0 | 0 | 0 | 0 | 0 | 0 | 0 | 0 | 0 | 0 | 0 | 0  | 0 | 0 | 0 | 0 | 0 |
|                                                                                                                                                                                                                                                                                                                                                                                                                                                                                                                                                                                                                                        | 0 | 0 | 0 | 0 | 0 | 0 | 0 | 0 | 0 | 0 | 0 | 0 | 0 | 0 | 0 | 0 | 0 | 0 | 0 | 0 | 0 | 0  | 0 | 0 | 0 | 0 | 0 |
|                                                                                                                                                                                                                                                                                                                                                                                                                                                                                                                                                                                                                                        | 0 | 0 | 0 | 0 | 0 | 0 | 0 | 0 | 0 | 0 | 0 | 0 | 0 | 0 | 0 | 0 | 0 | 0 | 0 | 0 | 0 | 0  | 0 | 0 | 0 | 0 | 0 |
|                                                                                                                                                                                                                                                                                                                                                                                                                                                                                                                                                                                                                                        | 0 | 0 | 0 | 0 | 0 | 0 | 0 | 0 | 0 | 0 | 0 | 0 | 0 | 0 | 0 | 0 | 0 | 0 | 0 | 0 | 0 | 38 | 0 | 0 | 0 | 0 | 0 |
| M02255_77_000000000-ADUT3_1_1114_4807_12334 T---AC--GT-AT-GGA-----GCA-A-G-----C-G-T--T--AT-C-CGG-AT-----TT-A--C-T-GG-GT-----GT--A---AA-GG-GA-GC-----G-TA-G-A-C-G-----G--T-TA-A-G-C-----AA---G-T-C-T-----G-A-A-G--TG--A-AA-GC--C-C-GG-G-G-----CC-C-AA-----C-C-C-C-G-G-A-A-C---T-G--C-T--T-T-----G--GA-A-A--C-----T--G-T-TG--A-A-C---T-A-G-A-G-T-G---C-AG---GA-G-A-----G-G-T-A--AG-T-----GG--A--ATT---C-C-T-A-GT--GT-A-G-CG-GT--G--A-A-A--TG-C-GT-AG--AT-A-TT--A-G--G-A-G-G-A-AC-A-CC--AG--T--G--GC-GAA-G--G-C-G-----G--C-T-T-A--CTG--G--AC-T-G-----T-A--A-C-T-GA--CG-T-T-G--A-GG--C-T-CG-A--AA-G-C--G-TG--GG-G--AG-C-A-AA-----CA--GG    |   |   |   |   |   |   |   |   |   |   |   |   |   |   |   |   |   |   |   |   |   |    |   |   |   |   |   |
| Bacteria(100);Firmicutes(100);Clostridia(100);Clostridiales(100);Lachnospiraceae(100);unclassified(100);unclassified(100);unclassified(100);unclassified(100);                                                                                                                                                                                                                                                                                                                                                                                                                                                                         |   |   |   |   |   |   |   |   |   |   |   |   |   |   |   |   |   |   |   |   |   |    |   |   |   |   |   |
| Otu1292                                                                                                                                                                                                                                                                                                                                                                                                                                                                                                                                                                                                                                | 0 | 0 | 0 | 0 | 0 | 0 | 0 | 0 | 0 | 0 | 0 | 0 | 0 | 0 | 0 | 0 | 0 | 0 | 0 | 0 | 0 | 0  | 0 | 0 | 0 | 0 | 0 |
|                                                                                                                                                                                                                                                                                                                                                                                                                                                                                                                                                                                                                                        | 0 | 0 | 0 | 0 | 0 | 0 | 0 | 0 | 0 | 0 | 0 | 0 | 0 | 0 | 0 | 0 | 0 | 0 | 0 | 0 | 0 | 0  | 0 | 0 | 0 | 0 | 0 |
|                                                                                                                                                                                                                                                                                                                                                                                                                                                                                                                                                                                                                                        | 0 | 0 | 0 | 0 | 0 | 0 | 0 | 0 | 0 | 0 | 0 | 0 | 0 | 0 | 0 | 0 | 0 | 0 | 0 | 0 | 0 | 0  | 0 | 0 | 0 | 0 | 0 |
|                                                                                                                                                                                                                                                                                                                                                                                                                                                                                                                                                                                                                                        | 0 | 0 | 0 | 0 | 0 | 0 | 0 | 0 | 0 | 0 | 0 | 0 | 0 | 0 | 0 | 0 | 0 | 0 | 0 | 0 | 0 | 17 | 0 | 0 | 0 | 0 | 0 |
| M02255_77_000000000-ADUT3_1_1112_23394_6639 T---AC--GT-AG-GGG-----GCA-A-G-----C-G-T--T--AT-C-CGG-AA-----TT-A--T-T-GG-GC-----GT--A---AA-GC-GT-GC-----G-TA-G-G-T-G-----G--T-TC-T-T-T-----AA---G-C-G-C-----A-G-G-G--TT--T-AA-GG--C-A-AT-G-G-----CC-C-AA-----C-C-A-T-T-G-T--T-----C-G--C-C--C-T-----G--CG-A-A--C-----T--G-G--AG--A-A-C---T-T-G-A-G-T-G---C-AG---GA-G-A-----G-G-A-A--AG-C-----GG--A--ATT---C-C-T-A-GT--GT-A-G-CG-GT--G--A-A-A--TG-C-GT-AG--AT-A-TT--A-G--G-A-G-G-A-AC-A-CC--AG--T--G--GC-GAA-G--G-C-G-----G--C-T-T-T---CTG--G--AC-T-G-----T-A--A-C-T-GA--CA-C-T-G--A-GG--C-A-CG-A--AA-G-C--G-TG--GG-G--AG-C-A-AA-----CA--GG |   |   |   |   |   |   |   |   |   |   |   |   |   |   |   |   |   |   |   |   |   |    |   |   |   |   |   |
| Bacteria(100);Firmicutes(100);Clostridia(100);Clostridiales(100);Family_XIII_Incertae_Sedis(100);unclassified(100);unclassified(100);unclassified(100);unclassified(100);                                                                                                                                                                                                                                                                                                                                                                                                                                                              |   |   |   |   |   |   |   |   |   |   |   |   |   |   |   |   |   |   |   |   |   |    |   |   |   |   |   |
| Otu1293                                                                                                                                                                                                                                                                                                                                                                                                                                                                                                                                                                                                                                | 0 | 0 | 0 | 0 | 0 | 0 | 0 | 0 | 0 | 0 | 0 | 0 | 0 | 0 | 0 | 0 | 0 | 0 | 0 | 0 | 0 | 0  | 0 | 0 | 0 | 0 | 0 |
|                                                                                                                                                                                                                                                                                                                                                                                                                                                                                                                                                                                                                                        | 0 | 0 | 0 | 0 | 0 | 0 | 0 | 0 | 0 | 0 | 0 | 0 | 0 | 0 | 0 | 0 | 0 | 0 | 0 | 0 | 0 | 0  | 0 | 0 | 0 | 0 | 0 |
|                                                                                                                                                                                                                                                                                                                                                                                                                                                                                                                                                                                                                                        | 0 | 0 | 0 | 0 | 0 | 0 | 0 | 0 | 0 | 0 | 0 | 0 | 0 | 0 | 0 | 0 | 0 | 0 | 0 | 0 | 0 | 0  | 0 | 0 | 0 | 0 | 0 |
|                                                                                                                                                                                                                                                                                                                                                                                                                                                                                                                                                                                                                                        | 0 | 0 | 0 | 0 | 0 | 0 | 0 | 0 | 0 | 0 | 0 | 0 | 0 | 0 | 0 | 0 | 0 | 0 | 0 | 0 | 0 | 78 | 0 | 0 | 0 | 0 | 0 |
| M02255_77_000000000-ADUT3_1_1107_24472_19389 T---AC--GG-AG-GGG-----GCT-A-G-----C-G-T--T--GT-T-CGG                                                                                                                                                                                                                                                                                                                                                                                                                                                                                                                                      |   |   |   |   |   |   |   |   |   |   |   |   |   |   |   |   |   |   |   |   |   |    |   |   |   |   |   |



Otu1295 0 0 0 0 0 0 0 0 0 0 0 0 0 0 0 0 0 0 0 0 0 0 0 0 0 0 0 0  
0 0 0 0 0 0 0 0 0 0 0 0 0 0 0 0 0 0 0 0 0 0 0 0 0 0 0 0  
0 0 0 0 0 0 0 0 0 0 0 0 0 0 0 0 0 0 0 0 0 0 0 0 0 0 0 0  
0 0 0 0 0 0 0 0 0 0 0 0 7 0 0 0 0 0 0 0 0 0 0 0 0 0 0  
M02255\_77\_000000000-ADUT3\_1\_2113\_21336\_9373 T---AC---GT-AG-GCA-----GCG-A-G-----C-G--T---T--GT-T-CGG-AG-----TT-A--C-T--GG-GC-----GT--A----AA-GC-GT-GC-----G-TA-G-G-C-G-----G--T-TG-T-C-T-----AA-  
---G-T-T-T-----G-G-T--G--TG--A-AA-TC--T-C-CC-G-G-----CT-T-AA-----C-T-G-G-G-A-G--G-G---T-G-C-G---C-C-----G-AA-A-A--C-----T--G-G--GT--G-A-C---TG-G-A-G-T--G---T-CG-----GA-G-A-----G-G-T-A--AG-C-----GG--A--ATT---C-C-T-G-  
GT--GT-A-G-CG-GT--G---A--A-A---TG-C-GT-AG--AG-A-TC--A-G--G-A-G-G-A-AC-A-CC--TG--T--G--GT-GTA-G--A-C--A-----G--C-T-T-A---CTG--G--AC-G-A-----T-A--A-C-T--GA--CG-C-T-G--A-GG--C-A-CG-A--AA-G-C---G-TG--GG-T--AG-C-  
A-AA-----CA--GG Bacteria(100);unclassified(100);unclassified(100);unclassified(100);unclassified(100);unclassified(100);unclassified(100);unclassified(100);unclassified(100);

Otu1296 0 0 0 0 0 0 0 0 0 0 0 0 0 0 0 0 0 0 0 0 0 0 0 0 0 0 0 0  
0 0 0 0 0 0 0 0 0 0 0 0 0 0 0 0 0 0 0 0 0 0 0 0 0 0 0 0  
0 0 0 0 0 0 0 0 0 0 0 0 0 0 0 0 0 0 0 0 0 0 0 0 0 0 0 0  
0 0 0 0 0 0 0 0 0 0 0 0 4 0 0 0 0 0 0 0 0 0 0 0 0 0 0 0  
M02255\_76\_000000000-ADUNE\_1\_1103\_20720\_18691 T---AC---GT-AA-GGT-----CCG-A-G-----C-G--T---T--GT-C-CGG-AA-----TC-A--T-T--GG-GC-----GT--A----AA-GG-GT-AC-----G-TA-G-G-C-G-----G--C-CA-A-A-C-----  
-----AA---G-T-T-A-----G-A-A-G--TG--A-AA-TC--C-T-AT-A-G-----CT-C-AA-----C-T-A-T-A-G-T-A-----A-G--C-T---T-T-----T-AA-A-A--C-----T-A-T--TT--G-G-C---T-T-G-A-G-A--T--A-TG---GA-A-G-----G-G-A-A--AG-T-----GG--A--ATT---C-C-  
T-A-GT--GT-A-G-CG-GT--G---A--A-A---TG-C-GC-AG--AT-A-TT--A-G--G-A-G-G-A-AT-A-CC--GG--T--G--GC-GAA-G--G-C-G-----A--C-T-T-T---CTG--G--CC-A-T-----G-A--T-C-T--GA--CG-C-T-G--A-GG--T-A-CG-A--AA-G-C---G-TG--GG-T--  
AG-C-A-AA-----CA--GG Bacteria(100);Firmicutes(100);Clostridia(100);Clostridiales(100);Family\_XI\_Incertae\_Sedis(100);Anaerococcus(100);unclassified(100);unclassified(100);unclassified(100);

Otu1297 0 0 0 0 0 0 0 0 0 0 0 0 0 0 0 0 0 0 0 0 0 0 0 0 0 0 0 0  
0 0 0 0 0 0 0 0 0 0 0 0 0 0 0 0 0 0 0 0 0 0 0 0 0 0 0 0  
0 0 0 0 0 0 0 0 0 0 0 0 0 0 0 0 0 0 0 0 0 0 0 0 0 0 0 0  
0 0 0 0 0 0 0 0 0 0 0 0 1 0 1 0 0 0 0 0 0 0 0 0 0 0 0 0  
M02255\_76\_000000000-ADUNE\_1\_1101\_16679\_4786 T---AA---GC-AC-CG-----GCT-A-A-----C-----T--AC-G-TGC-CA-----GC-A--G-C--CG-CG-----GT--A----AT-AC-GT-A-----G---G-G-T-G-----C--A-AG-C-G-T-----TA---A-  
T-C-G-----G-A-T--G--TG--A-AA-TC--C-C-CG-G-G-----CT-C-AA-----C-C-T-G-G-G-A-A-T---T-G--C-A---T-T-----G--GA-G-A--C-----T--G-C--AA-G-G-C---T-A-G-A-A-T--C---T-GG---CA-G-A-----G-G-G-G---GG-T-----AG--A--ATT---C-C-A-C-GT--  
GT-A-G-CA-GT--G---A--A-A---TG-C-GT-AG--AT-A-TG--T-G--G-A-G-G-A-AC-A-CC--GA--T--G--GC-GAA-G--G-C-A-----G--C-C-C-C---CTG--G--GT-C-A-----A-G---A-T-T--GA--CG-C-T-C--A-TG--C-A-CG-A--AA-G-C---G-TG--GG-G--AG-C-A-  
AA-----CA--GG Bacteria(100);Proteobacteria(100);Betaproteobacteria(100);Burkholderiales(100);Oxalobacteraceae(100);Janthinobacterium(100);unclassified(100);unclassified(100);unclassified(100);

Otu1298 0 0 0 0 0 0 0 0 0 0 0 0 0 0 0 0 0 0 0 0 0 0 0 0 0 0 0 0  
0 0 0 0 0 0 0 0 0 0 0 0 0 0 0 0 0 0 0 0 0 0 0 0 0 0 0 0  
0 0 0 0 0 0 0 0 0 0 0 0 0 0 0 0 0 0 0 0 0 0 0 0 0 0 0 0  
0 0 0 0 0 0 0 0 0 0 0 0 18 0 0 0 0 0 0 0 0 0 0 0 0 0 0  
M02255\_76\_000000000-ADUNE\_1\_1108\_9926\_9559 .....AC---T-AC-GT-----GCC-A-G-----C--A-G---C--CG-C-GGT-AA-----TA-C--G-T--AG-GT-----GG--C---AA-GC-G--TT-----G---T-C-C-G-----G--T-CT-T-T-T-----AA---G-  
T-C-T-----G-A-T--G--TG--A-AA-TA--T-C-GG-G-G-----CT-C-AA-----C-C-C-C-G-A-G--G-----G-GT-C-A---T-T-----G--GA-A-A--C-----T--G-G--GA--G-A-C---T-T-G-A-G-T-A---C-AG---AA-G-A-----G-G-A-G---AG-T-----GG--A--ATT---C-C-A-C-GT--  
GT-A-G-CG-GT--G---A--A-A---TG-C-GT-AG--AT-A-TG--T-G--G-A-G-G-A-AC-A-CC--AG--T--G--GC-GAA-G--G-C-G-----A--C-T-C-T---CTG--G--TC-T-G-----T-A--A-C-T--GA--CG-C-T-G--A-GG--C-G-CG-A--AA-G-C---G-TG--GG-G--AG-C-A-  
AA-----CA--GG Bacteria(100);Firmicutes(100);Bacilli(100);Bacillales(100);unclassified(100);unclassified(100);unclassified(100);unclassified(100);unclassified(100);

Otu1299 0 0 0 0 0 0 0 0 0 0 0 0 0 0 0 0 0 0 0 0 0 0 0 0 0 0 0 0  
0 0 0 0 0 0 0 0 0 0 0 0 0 0 0 0 0 0 0 0 0 0 0 0 0 0 0 0  
0 0 0 0 0 0 0 0 0 0 0 0 0 0 0 0 0 0 0 0 0 0 0 0 0 0 0 0  
0 0 0 0 0 0 0 0 0 0 0 0 8 0 0 0 0 0 0 0 0 0 0 0 0 0 0 0  
M02255\_76\_000000000-ADUNE\_1\_2110\_20926\_23895 T---AC---GG-AG-GGA-----GCT-A-G-----C-G--T---T--GT-T-CGG-AA-----AT-A--C-T--GG-GC-----GT--A----AA-GC-G-----G-CA---T-C-----G-----T-----  
AG---G-T-C-A-----G-G-G--G--TG--A-AA-TC--C-C-GG-G-G-----CT-C-AA-----C-C-C-C-G-G-A-A-C---T-G--C-C---C-T-----T--GA-A-A--C-----T--G-C--AG--T-G-C---T-A-G-A-A-T--C---T-TG---GA-G-A-----G-G-C-G---AG-T-----GG--A--ATT---C-C-G-  
A-GT--GT-A-G-AG-GT--G---A--A-A---TT-C-GT-AG--AT-A-TT--C-G--G-A-G-G-A-AC-A-CC--AG--T--G--GC-GAA-G--G-C-G-----A--C-T-C-G---CTG--G--AC-A-A-----G-T---A-T-T--GA--CG-C-T-G--A-GG--T-G-CG-A--AA-G-C---G-TG--GG-G--  
AG-C-A-AA-----CA--GG Bacteria(100);Proteobacteria(100);Alphaproteobacteria(100);Sphingomonadales(100);Erythrobacteraceae(100);unclassified(100);unclassified(100);unclassified(100);unclassified(100);



|                                                                                                                                                                                                                            |   |   |   |   |   |   |   |   |   |   |    |   |    |                                                                                                                                                                                 |   |   |   |   |   |   |   |   |   |   |   |   |   |  |
|----------------------------------------------------------------------------------------------------------------------------------------------------------------------------------------------------------------------------|---|---|---|---|---|---|---|---|---|---|----|---|----|---------------------------------------------------------------------------------------------------------------------------------------------------------------------------------|---|---|---|---|---|---|---|---|---|---|---|---|---|--|
| Otu1300                                                                                                                                                                                                                    | 0 | 0 | 0 | 0 | 0 | 0 | 0 | 0 | 0 | 0 | 0  | 0 | 0  | 0                                                                                                                                                                               | 0 | 0 | 0 | 0 | 0 | 0 | 0 | 0 | 0 | 0 | 0 | 0 | 0 |  |
|                                                                                                                                                                                                                            | 0 | 0 | 0 | 0 | 0 | 0 | 0 | 0 | 0 | 0 | 0  | 0 | 0  | 0                                                                                                                                                                               | 0 | 0 | 0 | 0 | 0 | 0 | 0 | 0 | 0 | 0 | 0 | 0 | 0 |  |
|                                                                                                                                                                                                                            | 0 | 0 | 0 | 0 | 0 | 0 | 0 | 0 | 0 | 0 | 0  | 0 | 0  | 0                                                                                                                                                                               | 0 | 0 | 0 | 0 | 0 | 0 | 0 | 0 | 0 | 0 | 0 | 0 | 0 |  |
|                                                                                                                                                                                                                            | 0 | 0 | 0 | 0 | 0 | 0 | 0 | 0 | 0 | 0 | 0  | 0 | 55 | 0                                                                                                                                                                               | 0 | 0 | 0 | 0 | 0 | 0 | 0 | 0 | 0 | 0 | 0 |   |   |  |
| M02255_77_000000000-ADUT3_1_1101_14447_23173                                                                                                                                                                               |   |   |   |   |   |   |   |   |   |   |    |   |    | T---AC---GA-AT-GGG-----GCA-A-G-----C-G-T---T--GT-T-CGG-AA-----TC-A--C-T--GG-GC-----GT--A-----AA-GC-GT-GT-----G-TA-G-G-C-G-----G--T-TT-A-T-C-----                                |   |   |   |   |   |   |   |   |   |   |   |   |   |  |
| -----AA-----G-T-C-A-----G-A-A--G-TG--A-AA-GC--C-C-AG-G-G-----CT-T-AA-----C-C-C-T-G-G-A--A-T---T-G--C-T---T-T-----T--GA-A-A--C-----T-G-A--TA-G-G-C---T-A-G-A-G-T--A--C-TG-----GA-G-A-----G-G-T-T---AG-C-----AG--A--ATT---C- |   |   |   |   |   |   |   |   |   |   |    |   |    |                                                                                                                                                                                 |   |   |   |   |   |   |   |   |   |   |   |   |   |  |
| C-A-A-GT--GT-A-G-AG-GT--G---A--A-A---TT-C-GC-AG--AT-A-TT--T-G--G-A-G-G-A-AT-A-CC---AG--T--G--GC-GCA-A--G-C-G-----G--C-T-A-A---CTG--G--AC-A-G-----T-A---A-C-T--GA--CG-C-T-G--A-GA--C-A-CG-A--AA-G-C---G-TG--GG-G-           |   |   |   |   |   |   |   |   |   |   |    |   |    |                                                                                                                                                                                 |   |   |   |   |   |   |   |   |   |   |   |   |   |  |
| -AT-C-A-AA-----CA--GG                                                                                                                                                                                                      |   |   |   |   |   |   |   |   |   |   |    |   |    | Bacteria(100);Proteobacteria(100);Alphaproteobacteria(100);DB1-14(100);unclassified(100);unclassified(100);unclassified(100);unclassified(100);unclassified(100);               |   |   |   |   |   |   |   |   |   |   |   |   |   |  |
| Otu1301                                                                                                                                                                                                                    | 0 | 0 | 0 | 0 | 0 | 0 | 0 | 0 | 0 | 0 | 0  | 0 | 0  | 0                                                                                                                                                                               | 0 | 0 | 0 | 0 | 0 | 0 | 0 | 0 | 0 | 0 | 0 | 0 |   |  |
|                                                                                                                                                                                                                            | 0 | 0 | 0 | 0 | 0 | 0 | 0 | 0 | 0 | 0 | 0  | 0 | 0  | 0                                                                                                                                                                               | 0 | 0 | 0 | 0 | 0 | 0 | 0 | 0 | 0 | 0 | 0 | 0 |   |  |
|                                                                                                                                                                                                                            | 0 | 0 | 0 | 0 | 0 | 0 | 0 | 0 | 0 | 0 | 0  | 0 | 0  | 0                                                                                                                                                                               | 0 | 0 | 0 | 0 | 0 | 0 | 0 | 0 | 0 | 0 | 0 | 0 |   |  |
|                                                                                                                                                                                                                            | 0 | 0 | 0 | 0 | 0 | 0 | 0 | 0 | 0 | 0 | 0  | 0 | 26 | 0                                                                                                                                                                               | 0 | 0 | 0 | 0 | 0 | 0 | 0 | 0 | 0 | 0 | 0 | 0 |   |  |
| M02255_77_000000000-ADUT3_1_1110_18231_23580                                                                                                                                                                               |   |   |   |   |   |   |   |   |   |   |    |   |    | T---AC---GT-AG-GTG-----GCA-A-G-----C-G-T---T--AT-C-CGG-AT-----TT-A--C-T--GG-GT-----GT--A-----AA-GG-GC-GT-----G-TA-G-G-C-G-----G--G-AA-A-G-C-----                                |   |   |   |   |   |   |   |   |   |   |   |   |   |  |
| -----AA-----G-T-C-A-----G-A-T-G-TG--A-AA-AC--T-G-TG-G-G-----CT-C-AA-----C-C-C-A-C-A-G--C-C---T-G--C-A---T-T-----T--GA-A-A--C-----T-G-T--TT--T-T-C---T-T-G-A-G-T--A--C-TG-----GA-G-A-----G-G-C-A--GA-T-----GG--A--ATT---C-  |   |   |   |   |   |   |   |   |   |   |    |   |    |                                                                                                                                                                                 |   |   |   |   |   |   |   |   |   |   |   |   |   |  |
| C-T-A-GT--GT-A-G-CG-GT--G---A--A-A---TG-C-GT-AG--AT-A-TT--A-G--G-A-G-G-A-AC-A-CC---AG--T--G--GC-GAA-G--G-C-G-----A--T-C-T-G---CTG--G--AC-A-G-----C-A---A-C-T--GA--CG-C-T-G--A-GG--C-G-CG-A--AA-G-C---G-TG--GG-             |   |   |   |   |   |   |   |   |   |   |    |   |    |                                                                                                                                                                                 |   |   |   |   |   |   |   |   |   |   |   |   |   |  |
| G--AG-C-A-AA-----CA--GG                                                                                                                                                                                                    |   |   |   |   |   |   |   |   |   |   |    |   |    | Bacteria(100);unclassified(100);unclassified(100);unclassified(100);unclassified(100);unclassified(100);unclassified(100);unclassified(100);unclassified(100);                  |   |   |   |   |   |   |   |   |   |   |   |   |   |  |
| Otu1302                                                                                                                                                                                                                    | 0 | 0 | 0 | 0 | 0 | 0 | 0 | 0 | 0 | 0 | 0  | 0 | 0  | 0                                                                                                                                                                               | 0 | 0 | 0 | 0 | 0 | 0 | 0 | 0 | 0 | 0 | 0 | 0 |   |  |
|                                                                                                                                                                                                                            | 0 | 0 | 0 | 0 | 0 | 0 | 0 | 0 | 0 | 0 | 0  | 0 | 0  | 0                                                                                                                                                                               | 0 | 0 | 0 | 0 | 0 | 0 | 0 | 0 | 0 | 0 | 0 | 0 |   |  |
|                                                                                                                                                                                                                            | 0 | 0 | 0 | 0 | 0 | 0 | 0 | 0 | 0 | 0 | 0  | 0 | 0  | 0                                                                                                                                                                               | 0 | 0 | 0 | 0 | 0 | 0 | 0 | 0 | 0 | 0 | 0 | 0 |   |  |
|                                                                                                                                                                                                                            | 0 | 0 | 0 | 0 | 0 | 0 | 0 | 0 | 0 | 0 | 0  | 0 | 25 | 0                                                                                                                                                                               | 0 | 0 | 0 | 0 | 0 | 0 | 0 | 0 | 0 | 0 | 0 |   |   |  |
| M02255_77_000000000-ADUT3_1_1113_11589_14477                                                                                                                                                                               |   |   |   |   |   |   |   |   |   |   |    |   |    | T---AC---GG-AG-GGG-----GCT-A-G-----C-G-T---T--GT-T-CGG-AA-----TT-A--C-T--GG-GC-----GT--A-----AA-GC-GC-AC-----G-TA-G-G-C-G-----G--C-TA-T-C-C-----                                |   |   |   |   |   |   |   |   |   |   |   |   |   |  |
| -----AA-----G-T-T-G-----G-G-G--G-TG--A-AA-TC--C-C-TG-G-G-----CT-T-AA-----C-C-C-A-G-G-A--A-C---T-G--C-C---T-T-----C--AA-A-A--C-----T-G-G--AT--G-G-C---T-A-G-A-G-T--C---C-GA---GA-G-A-----G-G-T-G---AG-T-----GG--A--ATT---   |   |   |   |   |   |   |   |   |   |   |    |   |    |                                                                                                                                                                                 |   |   |   |   |   |   |   |   |   |   |   |   |   |  |
| T-C-C-A-GT--GT-A-G-AG-GT--G---A--A-A---TT-C-GT-AG--AT-A-TT--G-G--A-A-A-G-A-AC-A-CC---AG--T--G--GC-GAA-G--G-C-G-----G--C-T-C-A---CTG--G--CT-C-G-----G-T---A-C-T--GA--CG-C-T-G--A-GG--T-G-CG-A--CA-G-C---G-TG--GG-           |   |   |   |   |   |   |   |   |   |   |    |   |    |                                                                                                                                                                                 |   |   |   |   |   |   |   |   |   |   |   |   |   |  |
| G--AG-C-A-AA-----CA--GG                                                                                                                                                                                                    |   |   |   |   |   |   |   |   |   |   |    |   |    | Bacteria(100);Proteobacteria(100);Alphaproteobacteria(100);Rhizobiales(100);Rhodobiaceae(100);Parvibaculum(100);unclassified(100);unclassified(100);unclassified(100);          |   |   |   |   |   |   |   |   |   |   |   |   |   |  |
| Otu1303                                                                                                                                                                                                                    | 0 | 0 | 0 | 0 | 0 | 0 | 0 | 0 | 0 | 0 | 0  | 0 | 0  | 0                                                                                                                                                                               | 0 | 0 | 0 | 0 | 0 | 0 | 0 | 0 | 0 | 0 | 0 | 0 |   |  |
|                                                                                                                                                                                                                            | 0 | 0 | 0 | 0 | 0 | 0 | 0 | 0 | 0 | 0 | 0  | 0 | 0  | 0                                                                                                                                                                               | 0 | 0 | 0 | 0 | 0 | 0 | 0 | 0 | 0 | 0 | 0 | 0 |   |  |
|                                                                                                                                                                                                                            | 0 | 0 | 0 | 0 | 0 | 0 | 0 | 0 | 0 | 0 | 0  | 0 | 0  | 0                                                                                                                                                                               | 0 | 0 | 0 | 0 | 0 | 0 | 0 | 0 | 0 | 0 | 0 | 0 |   |  |
|                                                                                                                                                                                                                            | 0 | 0 | 0 | 0 | 0 | 0 | 0 | 0 | 0 | 0 | 25 | 0 | 0  | 0                                                                                                                                                                               | 0 | 0 | 0 | 0 | 0 | 0 | 0 | 0 | 0 | 0 | 0 |   |   |  |
| M02255_77_000000000-ADUT3_1_1117_11605_11861                                                                                                                                                                               |   |   |   |   |   |   |   |   |   |   |    |   |    | T---AC---GT-AG-GGG-----GCG-A-G-----C-G-T---T--AT-C-CGG-AA-----TC-A--T-T--GG-GC-----GT--A-----AA-GC-GC-GC-----G-CA-G-G-C-G-----G--G-CT-T-T-C-----                                |   |   |   |   |   |   |   |   |   |   |   |   |   |  |
| -----AA-----G-C-G-G-----C-GGC--G--TC--G-AA-GC--C-G-GG-G-G-----CT-C-AA-----C-C-C-C-C-G-G--A-----A-G--C-G---C-C-----C--CG-A-A--C-----T--G-G--AA--G-C-C---T-C-G-G-A-T--G---C-GG---CA-G-G-----G-G-G-A---GG-C-----GG--A--ATT--- |   |   |   |   |   |   |   |   |   |   |    |   |    |                                                                                                                                                                                 |   |   |   |   |   |   |   |   |   |   |   |   |   |  |
| -C-C-C-G-GT--GT-A-G-AG-GT--G---A--A-A---TG-C-GC-AG--AT-A-TC--G-G--G-A-A-G-A-AC-A-CC---GA--C--G--GC-GAA-G--G-C-A-----G--C-C-T-C---CTG--G--GC-C-G-----G-C---A-T-C--GA--CG-C-T-G--A-GG--C-G-CG-A--AA-G-C---T-GG--             |   |   |   |   |   |   |   |   |   |   |    |   |    |                                                                                                                                                                                 |   |   |   |   |   |   |   |   |   |   |   |   |   |  |
| GG-G--AG-C-G-AA-----CA--GG                                                                                                                                                                                                 |   |   |   |   |   |   |   |   |   |   |    |   |    | Bacteria(100);Actinobacteria(100);Actinobacteria(100);Coriobacteridae(100);Coriobacteriales(100);Coriobacterineae(100);Coriobacteriaceae(100);Slackia(100);unclassified(100);   |   |   |   |   |   |   |   |   |   |   |   |   |   |  |
| Otu1304                                                                                                                                                                                                                    | 0 | 0 | 0 | 0 | 0 | 0 | 0 | 0 | 0 | 0 | 0  | 0 | 0  | 0                                                                                                                                                                               | 0 | 0 | 0 | 0 | 0 | 0 | 0 | 0 | 0 | 0 | 0 | 0 |   |  |
|                                                                                                                                                                                                                            | 0 | 0 | 0 | 0 | 0 | 0 | 0 | 0 | 0 | 0 | 0  | 0 | 0  | 0                                                                                                                                                                               | 0 | 0 | 0 | 0 | 0 | 0 | 0 | 0 | 0 | 0 | 0 | 0 |   |  |
|                                                                                                                                                                                                                            | 0 | 0 | 0 | 0 | 0 | 0 | 0 | 0 | 0 | 0 | 0  | 0 | 0  | 0                                                                                                                                                                               | 0 | 0 | 0 | 0 | 0 | 0 | 0 | 0 | 0 | 0 | 0 | 0 |   |  |
|                                                                                                                                                                                                                            | 0 | 0 | 0 | 0 | 0 | 0 | 0 | 0 | 0 | 0 | 0  | 0 | 10 | 0                                                                                                                                                                               | 0 | 0 | 0 | 0 | 0 | 0 | 0 | 0 | 0 | 0 | 0 |   |   |  |
| M02255_77_000000000-ADUT3_1_1118_25169_10978                                                                                                                                                                               |   |   |   |   |   |   |   |   |   |   |    |   |    | T---AC---GA-AG-GGG-----GCT-A-G-----C-G-T---T--GC-T-CGG-AA-----TG-A--C-T--GG-GC-----GT--A-----AA-GG-GC-GC-----G-TA-G-G-C-G-----G--A-TG-G-G-A---                                  |   |   |   |   |   |   |   |   |   |   |   |   |   |  |
| -----CA-----G-T-C-A-----G-A-T-G-TG--A-AA-TT--C-C-CG-G-G-----CT-T-AA-----C-C-T-G-G-G-G--G-C---T-G--C-A---T-T-----T--GA-T-A--C-----G--T-G--TT--G-T-C---T-A-G-A-G-T--T---C-GG---AA-G-A-----G-G-G-T---CG-T-----GG--A--ATT---   |   |   |   |   |   |   |   |   |   |   |    |   |    |                                                                                                                                                                                 |   |   |   |   |   |   |   |   |   |   |   |   |   |  |
| C-C-C-A-GT--GT-A-G-AG-GT--G---A--A-A---TT-C-GT-AG--AT-A-TT--G-G--G-A-A-G-A-AC-A-CC---GG--T--G--GC-GAA-G--G-C-G-----G--C-G-A-C---CTG--G--TC-C-T-----G-G---A-C-T--GA--CG-C-T-G--A-GG--C-G-CG-A--AA-G-C---G-TG--              |   |   |   |   |   |   |   |   |   |   |    |   |    |                                                                                                                                                                                 |   |   |   |   |   |   |   |   |   |   |   |   |   |  |
| GG-G--AG-C-A-AA-----CA--GG                                                                                                                                                                                                 |   |   |   |   |   |   |   |   |   |   |    |   |    | Bacteria(100);Proteobacteria(100);Alphaproteobacteria(100);Rhodospirillales(100);Acetobacteraceae(100);unclassified(100);unclassified(100);unclassified(100);unclassified(100); |   |   |   |   |   |   |   |   |   |   |   |   |   |  |



Otu1305      0      0      0      0      0      0      0      0      0      0      0      0      0      0      0      0      0      0      0      0      0      0      0      0      0      0      0  
0      0      0      0      0      0      0      0      0      0      0      0      0      0      0      0      0      0      0      0      0      0      0      0      0      0      0      0  
0      0      0      0      0      0      0      0      0      0      0      0      0      0      0      0      0      0      0      0      0      0      0      0      0      0      0      0  
0      0      0      0      0      0      0      0      0      0      0      0      0      34      0      0      0      0      0      0      0      0      0      0      0      0      0  
M02255\_77\_000000000-ADUT3\_1\_1106\_5009\_4856    G---AC---GT-AG-GGA-----GCA-A-G-----C--G--T---T--GT-C-CGG-AT-----TT-A--T-T--GG-GC-----GT--A----AA-GG-GC-TC-----C-TA-G-G-T-G-----G--T-TC-A-G-T-----AA-  
---G-T-C-G-----A-C-T--G--TG--A-AA-AT--C-C-AA-G-G-----CT-C-AA-----C-C-T-T-G-G-G-A-----C-G-CC-A--G--T-----C--GA-T-A--C-----T--G-C--TG-TG-A-C---T-T-G-A-G-T--T---C-GG-----TA-G-A-----G-G-A-G---TG-T-----GG--A--ATT---T-C-T-G-  
GT--GT-A-G-CG-GT--G---A--A---TG-C-GC-AG--AT-A-TC--A-G--A-A-G-G-A-AC-A-CC---AA--C--G--GC-GAA-G--G-C-A-----G--C-A-C-T---CTG--G--GC-C-G-----A-T---A-C-T--GA--CA-C-T-G--A-AG--A-G-CG-A--AA-G-C---G-TG--GG-G--AG-  
C-A-AA-----CA--GG    Bacteria(100);Actinobacteria(100);Actinobacteria(100);unclassified(100);unclassified(100);unclassified(100);unclassified(100);unclassified(100);unclassified(100);

Otu1306      0      0      0      0      0      0      0      0      0      0      0      0      0      0      0      0      0      0      0      0      0      0      0      0      0      0      0  
0      0      0      0      0      0      0      0      0      0      0      0      0      0      0      0      0      0      0      0      0      0      0      0      0      0      0      0  
0      0      0      0      0      0      0      0      0      0      0      0      0      0      0      0      0      0      0      0      0      0      0      0      0      0      0      0  
0      0      0      0      0      0      0      0      0      0      0      0      0      15      0      0      0      0      0      0      0      0      0      0      0      0      0      0  
M02255\_77\_000000000-ADUT3\_1\_1112\_5686\_12538    T---AC---GG-AG-GGT-----GCA-A-G-----C--G--T---T--GT-T-CGG-AA-----TC-A--T-T--GG-GC-----GT--A----AA-GC-GC-GC-----G-CA-G-G-C-G-----G--T-CT-G-T-C-----AA-  
---G-T-C-T-----G-A-T--G--TG--A-AA-TC--C-C-GG-G-G-----CT-C-AA-----C-C-C-C-G-G-G-C-G---T-G--C-A--T--T-----G--GA-A-A--C-----T--G-A--TG--G-A-C---T-G-G-A-G-T--T---T-GG-----GA-G-A-----G-G-C-T--AG-T-----GG--A--ATT---C-C-A-G-  
GT--GT-A-G-GG-GT--G---A--A---TC-C-GT-AG--AG-A-TC--T-G--G-A-G-G-A-AC-A-CC---GG--T--G--GC-GAA-G--G-C-G-----A--C-T-G-G---CTG--G--AC-C-A-----A-T---A-C-T--GA--CG-C-T-G--A-AG--C-G-CG-A--AA-G-C---G-TG--GG-G--AG-  
C-A-AA-----CA--GG    Bacteria(100);Proteobacteria(100);unclassified(100);unclassified(100);unclassified(100);unclassified(100);unclassified(100);unclassified(100);unclassified(100);

Otu1307      0      0      0      0      0      0      0      0      0      0      0      0      0      0      0      0      0      0      0      0      0      0      0      0      0      0      0  
0      0      0      0      0      0      0      0      0      0      0      0      0      0      0      0      0      0      0      0      0      0      0      0      0      0      0      0  
0      0      0      0      0      0      0      0      0      0      0      0      0      0      0      0      0      0      0      0      0      0      0      0      0      0      0      0  
0      0      0      0      0      0      0      0      0      0      0      0      0      6      0      0      0      0      0      0      0      0      0      0      0      0      0      0  
M02255\_77\_000000000-ADUT3\_1\_2117\_14869\_20931      T---AC---GT-AG-GGG-----CCG-A-G-----C--G--T---T--GT-C-CGG-AA-----TT-A--C-T--GG-GC-----GT--A----AA-GC-GC-GC-----G-CA-G-G-C-G-----G--C-TC-G-T-C-----  
-----AA---G-C-C-T-----G-A-C--G--TG--A-AA-GC--C-C-CC-G-G-----CT-C-AA-----C-C-G-G-G-G-A--G-G---G-T--C-G---T--C-----G--GG-G-A--C-----T--G-G--CG--A-G-C---T-T-G-A-G-G-T--C-GG-----CA-G-G-----G-G-C-T--GG-T-----GG--A--ATT---  
C-C-C--GGT--GT-A-G-TG-GT--G---A--A---TG-C-GT-AG--AG-A-TC--G-G--G-A-G-G-A-AC-A-CC---CG--T--G--GC-GAA-G--G-C-----GG--C-C-A-G---CTG--G--GC-C-G-----G-A---C-C-T--GA--CG-C-T-G---AGG-C-G-CG---AA-GGC---G-T---  
GGGG--AG-C-G-AA-----CG--GG      Bacteria(100);Chloroflexi(100);Thermomicrobia(100);JG30-KF-CM45(100);unclassified(100);unclassified(100);unclassified(100);unclassified(100);unclassified(100);

Otu1308      0      0      0      0      0      0      0      0      0      0      0      0      0      0      0      0      0      0      0      0      0      0      0      0      0      0      0  
0      0      0      0      0      0      0      0      0      0      0      0      0      0      0      0      0      0      0      0      0      0      0      0      0      0      0      0  
0      0      0      0      0      0      0      0      0      0      0      0      0      0      0      0      0      0      0      0      0      0      0      0      0      0      0      0  
0      0      0      0      0      0      0      0      0      0      0      0      0      1      0      0      0      0      0      0      0      0      59      0      0      0      0      0  
M02255\_77\_000000000-ADUT3\_1\_1105\_24500\_11047      T---AC---GT-AG-GGG-----GCG-A-G-----C--G--T---T--GT-C-CGG-AA-----TG-A--C-T--GG-GC-----GT--A----AA-GG-GC-GT-----G-TA-G-G-C-G-----G--C-CT-G-T-T---  
-----AA---G-T-T-A-----G-G-A--G--TG--A-AA-GT--C-C-CG-C-T-----TT-C-AA-----G-G-T-G-G-G-A--A-T---T-G--C-T---T--T-----T--AA-T-A--C-----T--G-A--TG--G-G-C---T-T-G-A-G-T--G---C-AG-----AA-G-A-----G-G-T-A---AG-T-----GG--A--ATT---  
C-C-C-A-GT--GT-A-G-CG-GT--G---A--A---TG-C-GT-AG--AG-A-TT--G-G--G-A-G-G-A-AC-A-CC---AG--T--G--GC-GAA-G--G-C-G-----A--C-T-T-A---CTG--G--GC-T-G-----T-A---A-C-T--GA--CG-C-T-G--A-AG--C-G-CG-A--AA-G-C---G-TG--  
GG-G--AG-C-G-AA-----CA--GG    Bacteria(100);Firmicutes(100);Clostridia(100);Clostridiales(100);unclassified(100);unclassified(100);unclassified(100);unclassified(100);unclassified(100);

Otu1309      0      0      0      0      0      0      0      0      0      0      0      0      0      0      0      0      0      0      0      0      0      0      0      0      0      0      0  
0      0      0      0      0      0      0      0      0      0      0      0      0      0      0      0      0      0      0      0      0      0      0      0      0      0      0      0  
0      0      0      0      0      0      0      0      0      0      0      0      0      0      0      0      0      0      0      0      0      0      0      0      0      0      0      0  
0      0      0      0      0      0      0      0      0      0      0      0      0      0      34      0      0      0      0      0      0      0      0      0      0      0      0      0  
M02255\_76\_000000000-ADUNE\_1\_1107\_20727\_20880      T---AC---GG-AG-GGG-----GTT-A-G-----C--G--T---T--GT-T-CGG-AA-----TG-A--C-T--GG-GC-----GT--A----AA-GC-GC-GC-----G-TA-G-G-C-G-----G--G-CT-G-G-A---  
-----AA---G-T-C-A-----G-A-G--G--TG--A-AA-GC--C-C-GG-G-G-----CT-C-AA-----C-C-C-C-G-G-A--A-C---T-G--C-C---T--T-----T--GA-G-A--C-----T--T-C--CA--G-C-C---T-C-G-A-G-T--T---C-GA-----GA-G-A-----G-G-T-G---GG-T-----GG--A--ATT---  
C-C-G-A-GT--GT-A-G-AG-GT--G---A--A---TT-C-GT-AG--AT-A-TT--C-G--G-A-G-G-A-AC-A-CC---AG--T--G--GC-GAA-G--G-C-G-----G--C-C-C-A---CTG--G--CT-C-G-----A-C---A-C-T--GA--CG-C-T-G--A-AG--C-G-CG-A--AA-G-C---G-CG--  
GG-G--AG-C-A-AA-----CA--GG    Bacteria(100);Proteobacteria(100);Alphaproteobacteria(100);unclassified(100);unclassified(100);unclassified(100);unclassified(100);unclassified(100);unclassified(100);



Otu1310 0 0 0 0 0 0 0 0 0 0 0 0 0 0 0 0 0 0 0 0 0 0 0 0 0 0 0 0  
0 0 0 0 0 0 0 0 0 0 0 0 0 0 0 0 0 0 0 0 0 0 0 0 0 0 0 0  
0 0 0 0 0 0 0 0 0 0 0 0 0 0 0 0 0 0 0 0 0 0 0 0 0 0 0 0  
0 0 0 0 0 0 0 0 0 0 0 0 0 0 0 11 0 0 0 0 0 0 0 0 0 0 0  
M02255\_76\_000000000-ADUNE\_1\_1115\_22116\_23019 GT---TC---GT-GCCAGC-----AGC-C-G-----C--G--G--T-AA-G-ACG-AA-----CC-G--T-G--CG-AA-----CG--T----TA-TT-CG-GA-----A-TC-A-C-T-G-----G--G-CC-G-G-A---  
-----AC---G-T-C-C-----GTA-G-C--TG--A-AA-TC--C-C-CC-G-G----CT-C-AA-----C-C-G-G-G-G-A--A-G----T-G--G-C--G--T-----G--GA-A-A--C-----G--A-C--CG--G-C-C---T-G-G-A-G-T--G---G-AG----GA-G-G-----G-G-G-A--TC-C-----GG--A--ACT--  
--C-C-C-G-GT--GG-A-G-CG-GT--G---A--A-A--TG-C-GT-TG--AG-A-TC--G-G--G-A-G-G-A-AC-G-CC--GG--C--G--GC-GAA-A-G-C--G-----G--G-A-T-C--CTG--G--AC-T-T-----C-G--A-C-T--GA--CG-C-T-G--A-GG--C-G-CG-A--AA-G-C---C-AG--  
GG-G--AG-C-G-AA-----CG--GG Bacteria(100);Planctomycetes(100);Planctomycetacia(100);Planctomycetales(100);Planctomycetaceae(100);unclassified(100);unclassified(100);unclassified(100);unclassified(100);

Otu1311 0 0 0 0 0 0 0 0 0 0 0 0 0 0 0 0 0 0 0 0 0 0 0 0 0 0 0 0  
0 0 0 0 0 0 0 0 0 0 0 0 0 0 0 0 0 0 0 0 0 0 0 0 0 0 0 0  
0 0 0 0 0 0 0 0 0 0 0 0 0 0 0 0 0 0 0 0 0 0 0 0 0 0 0 0  
0 0 0 0 0 0 0 0 0 0 25 0 0 0 0 0 0 0 0 0 0 0 0 0 0 0 0 0  
M02255\_77\_000000000-ADUT3\_1\_1108\_5255\_13667 T---AC---GT-AG-GGG-----GCA-A-G-----C--G--T---T--AT-C-CGG-AA-----TT-A--C-T--GG-GC-----GT--A-----AA-GG-GT-GC-----G-TA-G-G-C-G-----G--T-TT-T-A-C-----AA-  
---G-T-T-G-----A-A-G--T--TT--T-AA-AC--T-A-TG-G-G----CT-T-AA-----C-C-C-A-T-A-T-C-----A-G--G-C---T--T-----C-AA-A-A--C-----T--G-T-AA--G-A-C---T-T-G-A-G-T--G---C-AG----GA-G-A-----G-G-A-A--AG-T-----GG--A--ATT---C-C-C-G-GT-  
-GT-A-G-CG-GT--G---A--A-A--TG-C-GT-AG--AT-A-TC--G-G--G-A-G-G-A-AT-A-CC--GG--T--G--GC-GAA-G--G-C--G-----A--C-T-T-T--CTG--G--AC-T-G-----T-A--A-C-T--GA--CG-C-T-G--A-GG--C-A-CG-A--AA-G-C---G-TG--GG-T--AG-C-A-  
AA-----CA--GG Bacteria(100);unclassified(100);unclassified(100);unclassified(100);unclassified(100);unclassified(100);unclassified(100);unclassified(100);unclassified(100);

Otu1312 0 0 0 0 0 0 0 0 0 0 0 0 0 0 0 0 0 0 0 0 0 0 0 0 0 0 0 0  
0 0 0 0 0 0 0 0 0 0 0 0 0 0 0 0 0 0 0 0 0 0 0 0 0 0 0 0  
0 0 0 0 0 0 0 0 0 0 0 0 0 0 0 0 0 0 0 0 0 0 0 0 0 0 0 0  
0 0 0 0 0 0 5 0 0 0 0 0 0 0 0 0 0 0 0 0 0 0 0 0 0 0 0 0  
M02255\_76\_000000000-ADUNE\_1\_2110\_3033\_12308 C---TA--AC-TC-TGT-----GCC-A-G-----C----A--G--CC-G-CGG-TA-----AT-A--C-A--GA-GG-----GT--G-----CA-AG-CG-TT-----G-TT-C-G--G-----A--A-TT-A-C-T-----AA---  
G-T-C-A-----G-A-T--G--TG--A-AA-TC--C-C-TT-G-G----CT-C-AA-----C-T-G-A-G-G-A--A-C---T-G--C-A--T-C-----T--GA-T-A--C-----T--G-G--TA--A-G-C---T-T-G-A-G-T--G---T-CG----GA-G-G-----G-G-A-T---GG-T-----AG--A--ATT---C-C-T-G-GT--  
GT-A-G-AG-GT--G---A--A-A--TT-C-GT-AG--AT-A-TC--A-G--G-A-G-G-A-AT-A-CC--TG--T--G--GC-GAA-G--G-C--G-----A--C-C-A-T--CTG--G--AA-G-A-----C-A--A-C-T--GA--CG-C-T-G--A-GA--C-T-CG-A--AA-G-C---G-TG--GG-T--AG-C-A-  
AA-----CA--GG Bacteria(100);Proteobacteria(100);unclassified(100);unclassified(100);unclassified(100);unclassified(100);unclassified(100);unclassified(100);unclassified(100);

Otu1313 0 0 0 0 0 0 0 0 0 0 0 0 0 0 0 0 0 0 0 0 0 0 0 0 0 0 0 0  
0 0 0 0 0 0 0 0 0 0 0 0 0 0 0 0 0 0 0 0 0 0 0 0 0 0 0 0  
0 0 0 0 0 0 0 0 0 0 0 0 0 0 0 0 0 0 0 0 0 0 0 0 0 0 0 0  
0 0 0 0 0 0 0 4 0 0 0 0 0 0 0 0 0 0 0 0 0 0 0 0 0 0 0 0  
M02255\_77\_000000000-ADUT3\_1\_1109\_21078\_19365 T---AC---GT-AG-GTG-----GCA-A-G-----C--G--T---T--AT-C-CGG-AT-----TT-A--C-T--GG-GT-----GT--A-----AA-GG-GT-GT-----G-TA-G-G-C-G-----G--G-AA-A-G-C-----  
-----AA---G-T-C-A-----G-A-T--G--TG--A-AA-TT--T-A-CG-G-G----CT-C-AA-----C-T-C-G-T-G-A--A-C---T-G--C-G--T--C-----T--GA-A-A--C-----T--G-T--TT--T-T-C---T-T-G-A-G-G--G---T-CG----GA-G-A-----G-G-T-A--AC-T-----GG--A--ATT---C-  
C-T-G-GT--GT-A-G-CG-GT--G---A--A-A--TG-C-GT-AG--AT-A-TC--A-G--G-A-G-G-A-AC-A-CC--GG--T--G--GC-GAA-G--G-C--G-----A--G-T-T-A--CTG--G--AC-G-A-----T-T--A-C-T--GA--CG-C-T-G--A-GA--C-A-CG-A--AA-G-T---G-TG--GG-  
G--AG-C-A-AA-----CA--GG Bacteria(100);unclassified(100);unclassified(100);unclassified(100);unclassified(100);unclassified(100);unclassified(100);unclassified(100);unclassified(100);

Otu1314 0 0 0 0 0 0 0 0 0 0 0 0 0 0 0 0 0 0 0 0 0 0 0 0 0 0 0 0  
0 0 0 0 0 0 0 0 0 0 0 0 0 0 0 0 0 0 0 0 0 0 0 0 0 0 0 0  
0 0 0 0 0 0 0 0 0 0 0 0 0 0 0 0 0 0 0 0 0 0 0 0 0 0 0 0  
0 0 0 0 0 0 0 10 0 0 0 0 0 0 0 0 0 0 0 0 0 0 0 0 0 0 0 0  
M02255\_77\_000000000-ADUT3\_1\_2101\_26815\_16754 T---AC---GT-AT-GGG-----GCA-A-G-----C--G--T---T--AT-C-CGG-AT-----TT-A--C-T--GG-GT-----GT--A-----AA-GG-GA-GC-----G-TA-G-A-C-G-----G--T-AC-G-G-C-----  
-----AA---G-C-C-C-----G-A-T--G--TG--A-AA-AC--C-C-GC-A-G----CT-C-AA-----C-T-G-C-G-G-G--A-T---T-G--C-A--T--T-----A--GG-A-A--C-----T--G-T--CG--A-A-C---T-A-G-A-G-T--G---T-CG----GA-G-A-----G-G-T-A--AG-T-----GG--A--ATT---  
C-C-T-A-GT--GT-A-G-CG-GT--G---A--A-A--TG-C-GT-AG--AT-A-TT--A-G--G-A-G-G-A-AC-A-CC--AG--T--G--GC-GAA-G--G-C--G-----G--C-T-T-A--CTG--G--AC-G-A-----T-G--A-C-T--GA--CG-T-T-G--A-GG--C-T-CG-A--AA-G-C---G-TG--GG-  
G--AG-C-A-AA-----CA--GG Bacteria(100);Firmicutes(100);Clostridia(100);Clostridiales(100);Lachnospiraceae(100);unclassified(100);unclassified(100);unclassified(100);unclassified(100);



|                                                                                                                                                                                                                                                                                                                                                                                                                                                                                                                                                                                                                                                                                                                                                                                                |   |   |   |   |   |   |    |   |   |   |   |   |   |   |   |   |   |   |   |   |   |   |   |   |   |   |   |
|------------------------------------------------------------------------------------------------------------------------------------------------------------------------------------------------------------------------------------------------------------------------------------------------------------------------------------------------------------------------------------------------------------------------------------------------------------------------------------------------------------------------------------------------------------------------------------------------------------------------------------------------------------------------------------------------------------------------------------------------------------------------------------------------|---|---|---|---|---|---|----|---|---|---|---|---|---|---|---|---|---|---|---|---|---|---|---|---|---|---|---|
| Otu1315                                                                                                                                                                                                                                                                                                                                                                                                                                                                                                                                                                                                                                                                                                                                                                                        | 0 | 0 | 0 | 0 | 0 | 0 | 0  | 0 | 0 | 0 | 0 | 0 | 0 | 0 | 0 | 0 | 0 | 0 | 0 | 0 | 0 | 0 | 0 | 0 | 0 | 0 | 0 |
|                                                                                                                                                                                                                                                                                                                                                                                                                                                                                                                                                                                                                                                                                                                                                                                                | 0 | 0 | 0 | 0 | 0 | 0 | 0  | 0 | 0 | 0 | 0 | 0 | 0 | 0 | 0 | 0 | 0 | 0 | 0 | 0 | 0 | 0 | 0 | 0 | 0 | 0 | 0 |
|                                                                                                                                                                                                                                                                                                                                                                                                                                                                                                                                                                                                                                                                                                                                                                                                | 0 | 0 | 0 | 0 | 0 | 0 | 0  | 0 | 0 | 0 | 0 | 0 | 0 | 0 | 0 | 0 | 0 | 0 | 0 | 0 | 0 | 0 | 0 | 0 | 0 | 0 | 0 |
|                                                                                                                                                                                                                                                                                                                                                                                                                                                                                                                                                                                                                                                                                                                                                                                                | 0 | 0 | 0 | 0 | 0 | 0 | 8  | 0 | 0 | 0 | 0 | 0 | 0 | 0 | 0 | 0 | 0 | 0 | 0 | 0 | 0 | 0 | 0 | 0 | 0 | 0 | 0 |
| M02255_77_000000000-ADUT3_1_2113_14103_14321 T---AC---GG-AG-GGT-----GCG-A-G-----C-G-T---T-AT-C-CGG-AA-----TT-A-C-T-GG-G-----T-----A---G-GC-----G-G-C-----TT-T-G-T-----AA---G-T-C-A-----G-G-A-G-TG-A-AA-GT--T-T-GC-G-G----CT-C-AA-----C-C-G-T-A-A-A-A-T---T-G-C-T---T-C-----T-GA-T-A--C-----T-G-C-AT-A-G-C---T-A-G-A-A-T-C--A-GG---AT-G-A-----G-G-T-C--AG-C----GG-A-ATG---T-G-G-C-AT--GT-A-G-CG-GT--G---A-A-A---TG-C-AT-AG--AT-A-TG--C-C-A-T-A-G-A-AC-A-CC--AA--T-T-GC-GAA-G-G-C-A-----G-C-T-G-G---CTA-G--AC-C-T-----G-T---A-T-T-GA-CG-C-T-G--A-GG--C-A-CG-A-AA-G-C--G-TG--GG-G--AG-C-G-AA-----CA--GG Bacteria(100);Bacteroidetes(100);unclassified(100);unclassified(100);unclassified(100);unclassified(100);unclassified(100);unclassified(100);unclassified(100);                           |   |   |   |   |   |   |    |   |   |   |   |   |   |   |   |   |   |   |   |   |   |   |   |   |   |   |   |
| Otu1316                                                                                                                                                                                                                                                                                                                                                                                                                                                                                                                                                                                                                                                                                                                                                                                        | 0 | 0 | 0 | 0 | 0 | 0 | 0  | 0 | 0 | 0 | 0 | 0 | 0 | 0 | 0 | 0 | 0 | 0 | 0 | 0 | 0 | 0 | 0 | 0 | 0 | 0 | 0 |
|                                                                                                                                                                                                                                                                                                                                                                                                                                                                                                                                                                                                                                                                                                                                                                                                | 0 | 0 | 0 | 0 | 0 | 0 | 0  | 0 | 0 | 0 | 0 | 0 | 0 | 0 | 0 | 0 | 0 | 0 | 0 | 0 | 0 | 0 | 0 | 0 | 0 | 0 | 0 |
|                                                                                                                                                                                                                                                                                                                                                                                                                                                                                                                                                                                                                                                                                                                                                                                                | 0 | 0 | 0 | 0 | 0 | 0 | 0  | 0 | 0 | 0 | 0 | 0 | 0 | 0 | 0 | 0 | 0 | 0 | 0 | 0 | 0 | 0 | 0 | 0 | 0 | 0 | 0 |
|                                                                                                                                                                                                                                                                                                                                                                                                                                                                                                                                                                                                                                                                                                                                                                                                | 0 | 0 | 0 | 0 | 0 | 0 | 13 | 0 | 0 | 0 | 0 | 0 | 0 | 0 | 0 | 0 | 0 | 0 | 0 | 0 | 0 | 0 | 0 | 0 | 0 | 0 | 0 |
| M02255_77_000000000-ADUT3_1_2116_18198_7987 G---AC---GG-AG-GGG-----GCT-A-G-----C-G-T---T-GT-T-CGG-AA-----TT-A-C-T-GG-GC-----GT--A---AA-GG-GC-GC-----G-TA-G-G-C-G-----G-A-TT-A-G-T-----AA---G-T-T-G-----G-G-A-G-TG-A-AA-TC--C-C-GG-G-G----CT-T-AA-----C-C-T-C-G-G-A-A-C---T-G-C-T---T-T-----C-AA-A-A--C-----T-A-C-TA-G-T-C---T-T-G-A-G-T-G---A-AG---TA-G-A-----G-G-A-T--GA-T-----GG--A-ATT---T-C-T-A-GT--GT-A-G-AG-GT--G---A-A-A---TT-C-TT-AG--AT-A-TT--A-G--A-A-G-G-A-AC-A-CC--GG--T-G-GC-GAA-G-G-C-G-----G-T-C-A-T---CTG-G-AC-T-T-----C-A--A-C-T-GA-CG-C-T-G--A-GG--C-G-CG-A-AA-G-C--G-TG--GG-G--AG-C-A-AA-----CA--GG Bacteria(100);Proteobacteria(100);Alphaproteobacteria(100);unclassified(100);unclassified(100);unclassified(100);unclassified(100);unclassified(100);unclassified(100); |   |   |   |   |   |   |    |   |   |   |   |   |   |   |   |   |   |   |   |   |   |   |   |   |   |   |   |
| Otu1317                                                                                                                                                                                                                                                                                                                                                                                                                                                                                                                                                                                                                                                                                                                                                                                        | 0 | 0 | 0 | 0 | 0 | 0 | 0  | 0 | 0 | 0 | 0 | 0 | 0 | 0 | 0 | 0 | 0 | 0 | 0 | 0 | 0 | 0 | 0 | 0 | 0 | 0 | 0 |
|                                                                                                                                                                                                                                                                                                                                                                                                                                                                                                                                                                                                                                                                                                                                                                                                | 0 | 0 | 0 | 0 | 0 | 0 | 0  | 0 | 0 | 0 | 0 | 0 | 0 | 0 | 0 | 0 | 0 | 0 | 0 | 0 | 0 | 0 | 0 | 0 | 0 | 0 | 0 |
|                                                                                                                                                                                                                                                                                                                                                                                                                                                                                                                                                                                                                                                                                                                                                                                                | 0 | 0 | 0 | 0 | 0 | 0 | 0  | 0 | 0 | 0 | 0 | 0 | 0 | 0 | 0 | 0 | 0 | 0 | 0 | 0 | 0 | 0 | 0 | 0 | 0 | 0 | 0 |
|                                                                                                                                                                                                                                                                                                                                                                                                                                                                                                                                                                                                                                                                                                                                                                                                | 0 | 0 | 0 | 0 | 0 | 0 | 6  | 0 | 0 | 0 | 0 | 0 | 0 | 0 | 0 | 0 | 0 | 0 | 0 | 0 | 0 | 0 | 0 | 0 | 0 | 0 | 0 |
| M02255_77_000000000-ADUT3_1_2101_17891_20822 T---AC---GG-AG-GAT-----GCA-A-G-----C-G-T---T-AT-C-CGG-AA-----TG-A-T-T-GG-GC-----GT--A---AA-GC-GT-CC-----G-CA-G-G-T-G-----G--C-AT-T-T-C-----AA---G-T-C-T-----G-C-G-G--TC-A-AA-GG--T-C-GA-G-G----CT-C-AA-----C-C-T-C-G-A-A-C-A---G-G--C-C--G-T-----G-GA-A-A--C-----T-G-A-AA-A-G-C---T-A-G-A-G-T-G--T-GG---TA-G-G-----G-G-C-A--GA-G-----GG--A-ATT---C-C-C-A-GT--GT-A-G-CG-GT--G---A-A-A---TG-C-GT-AG--AG-A-TT--G-G--G-A-A-G-A-AC-A-CC--GG--T-G-GC-GAA-A-G-C-G-----C-T-C-T-G---CTA-G--GC-C-A-----A-G--A-C-T-GA-CA-C-T-G--A-GG--G-A-CG-A-AA-G-C--T-AG--GG-G--AG-C-G-AA-----TG--GG Bacteria(100);Cyanobacteria(100);unclassified(100);unclassified(100);unclassified(100);unclassified(100);unclassified(100);unclassified(100);unclassified(100);      |   |   |   |   |   |   |    |   |   |   |   |   |   |   |   |   |   |   |   |   |   |   |   |   |   |   |   |
| Otu1318                                                                                                                                                                                                                                                                                                                                                                                                                                                                                                                                                                                                                                                                                                                                                                                        | 0 | 0 | 0 | 0 | 0 | 0 | 0  | 0 | 0 | 0 | 0 | 0 | 0 | 0 | 0 | 0 | 0 | 0 | 0 | 0 | 0 | 0 | 0 | 0 | 0 | 0 | 0 |
|                                                                                                                                                                                                                                                                                                                                                                                                                                                                                                                                                                                                                                                                                                                                                                                                | 0 | 0 | 0 | 0 | 0 | 0 | 0  | 0 | 0 | 0 | 0 | 0 | 0 | 0 | 0 | 0 | 0 | 0 | 0 | 0 | 0 | 0 | 0 | 0 | 0 | 0 | 0 |
|                                                                                                                                                                                                                                                                                                                                                                                                                                                                                                                                                                                                                                                                                                                                                                                                | 0 | 0 | 0 | 0 | 0 | 0 | 0  | 0 | 0 | 0 | 0 | 0 | 0 | 0 | 0 | 0 | 0 | 0 | 0 | 0 | 0 | 0 | 0 | 0 | 0 | 0 | 0 |
|                                                                                                                                                                                                                                                                                                                                                                                                                                                                                                                                                                                                                                                                                                                                                                                                | 0 | 0 | 0 | 0 | 0 | 0 | 0  | 2 | 0 | 1 | 0 | 0 | 0 | 0 | 0 | 0 | 0 | 0 | 0 | 0 | 0 | 0 | 0 | 0 | 0 | 0 | 0 |
| M02255_76_000000000-ADUNE_1_2110_9582_8051 .....AC---T-A--CGT-----GCC-A-G-----C---A--G-CC-G-CGG-TA-----AT-A-C-G--TA-GG-----GT--G---CA-A-GC-GT-----T-CA--T-C-G-----G--T-TT-T-G-T-----AA---G-T-C-T-----G-A-T-G--TG-A-AA-TC--C-C-CG-G-G----CT-C-AA-----C-C-T-G-G-G-A-A-T---T-G-C-A--T-T-----G-GA-G-A--C-----T-G-C-AA-G-G-C---T-A-G-A                                                                                                                                                                                                                                                                                                                                                                                                                                                              |   |   |   |   |   |   |    |   |   |   |   |   |   |   |   |   |   |   |   |   |   |   |   |   |   |   |   |



|                                                                                                                                                                                                              |   |   |   |   |   |   |   |   |    |   |   |   |   |   |    |   |   |   |   |   |   |   |   |   |   |   |  |
|--------------------------------------------------------------------------------------------------------------------------------------------------------------------------------------------------------------|---|---|---|---|---|---|---|---|----|---|---|---|---|---|----|---|---|---|---|---|---|---|---|---|---|---|--|
| Otu1320                                                                                                                                                                                                      | 0 | 0 | 0 | 0 | 0 | 0 | 0 | 0 | 0  | 0 | 0 | 0 | 0 | 0 | 0  | 0 | 0 | 0 | 0 | 0 | 0 | 0 | 0 | 0 | 0 | 0 |  |
|                                                                                                                                                                                                              | 0 | 0 | 0 | 0 | 0 | 0 | 0 | 0 | 0  | 0 | 0 | 0 | 0 | 0 | 0  | 0 | 0 | 0 | 0 | 0 | 0 | 0 | 0 | 0 | 0 | 0 |  |
|                                                                                                                                                                                                              | 0 | 0 | 0 | 0 | 0 | 0 | 0 | 0 | 0  | 0 | 0 | 0 | 0 | 0 | 0  | 0 | 0 | 0 | 0 | 0 | 0 | 0 | 0 | 0 | 0 | 0 |  |
|                                                                                                                                                                                                              | 0 | 0 | 0 | 0 | 0 | 0 | 0 | 0 | 0  | 0 | 0 | 0 | 0 | 0 | 15 | 0 | 0 | 0 | 0 | 0 | 0 | 0 | 0 | 0 | 0 | 0 |  |
| M02255_76_000000000-ADUNE_1_2114_20743_11527 .....AC---T-A-CGT-----GCC-A-G----C-A-G--C-CG-C-GGT-AA-----TA-C-G-T-AG-GG-----GG-C---AA-GC-G--TT-----G-T---C-C-G-----G-T-TT-C-T-T-----                           |   |   |   |   |   |   |   |   |    |   |   |   |   |   |    |   |   |   |   |   |   |   |   |   |   |   |  |
| AA---G-T-C-T-----G-A-T--G--TG--A-AA-TC--T-T-GC-G-G----CT-C-AA-----C-C-G-C-A-A-G-C-----G-GT-C-A--T-T-----G-GA-A-A--C-----T-G-G-GG--A-A-C---T-T-G-A-G-T-G--C-AG---AA-G-A-----G-G-A-G--AG-T-----GG-A-ATT---C-C- |   |   |   |   |   |   |   |   |    |   |   |   |   |   |    |   |   |   |   |   |   |   |   |   |   |   |  |
| A-C-GT--GT-A-G-CG-GT--G---A-A-A---TG-C-GT-AG--AG-A-TG--T-G--G-A-G-G-A-AC-A-CC--AG--T-G-GC-GAA-G-G-C-G-----A-C-T-C-T--CTG-G-TC-T-G-----T-A--A-C-T--GA-CG-C-T-G--A-GG--T-G-CG-A--AA-G-C---G-TG--GG-T--         |   |   |   |   |   |   |   |   |    |   |   |   |   |   |    |   |   |   |   |   |   |   |   |   |   |   |  |
| AG-C-G-AA-----CA--GG Bacteria(100);Firmicutes(100);Bacilli(100);Bacillales(100);Bacillaceae(100);unclassified(100);unclassified(100);unclassified(100);unclassified(100);                                    |   |   |   |   |   |   |   |   |    |   |   |   |   |   |    |   |   |   |   |   |   |   |   |   |   |   |  |
| Otu1321                                                                                                                                                                                                      | 0 | 0 | 0 | 0 | 0 | 0 | 0 | 0 | 0  | 0 | 0 | 0 | 0 | 0 | 0  | 0 | 0 | 0 | 0 | 0 | 0 | 0 | 0 | 0 | 0 | 0 |  |
|                                                                                                                                                                                                              | 0 | 0 | 0 | 0 | 0 | 0 | 0 | 0 | 0  | 0 | 0 | 0 | 0 | 0 | 0  | 0 | 0 | 0 | 0 | 0 | 0 | 0 | 0 | 0 | 0 | 0 |  |
|                                                                                                                                                                                                              | 0 | 0 | 0 | 0 | 0 | 0 | 0 | 0 | 0  | 0 | 0 | 0 | 0 | 0 | 0  | 0 | 0 | 0 | 0 | 0 | 0 | 0 | 0 | 0 | 0 | 0 |  |
|                                                                                                                                                                                                              | 0 | 0 | 0 | 0 | 0 | 0 | 0 | 0 | 25 | 0 | 0 | 0 | 0 | 0 | 0  | 0 | 0 | 0 | 0 | 0 | 0 | 0 | 0 | 0 | 0 | 0 |  |
| M02255_77_000000000-ADUT3_1_1102_22875_6970 T---AC--GT-AG-GGT-----CCA-A-G----C-G-T--T-GT-C-CGG-AT-----TT-A-T-T-GG-GC-----GT--A---AA-GA-GC-TC-----G-TA-G-G-T-G-----G-T-TC-G-G-T-----AA--                      |   |   |   |   |   |   |   |   |    |   |   |   |   |   |    |   |   |   |   |   |   |   |   |   |   |   |  |
| --G-T-C-G-----G-A-T--G--TG--A-AA-AC--T-C-GG-G-G----CT-C-AA-----C-C-C-C-G-A-G-A---C-G-CC-A--T-C-----C-GA-T-A--C-----T-G-C-TG-TG-A-C---T-T-G-A-G-T-C--T-GG---TA-G-G-----G-G-A-G--AT-C-----GG--A-ATT---C-C-T-G- |   |   |   |   |   |   |   |   |    |   |   |   |   |   |    |   |   |   |   |   |   |   |   |   |   |   |  |
| GT--GT-A-G-CG-GT--G---A-A-A---TG-C-GC-AG--AT-A-TC--A-G--G-A-G-G-A-AC-A-CC--GG--T-G-GC-GAA-G-G-C-G-----G-A-T-C-T--CTG-G-GC-C-A-----G-T--A-C-T-GA-CA-C-T-G--A-GG--A-G-CG-A--AA-G-C---G-TG--GG-T--AG-           |   |   |   |   |   |   |   |   |    |   |   |   |   |   |    |   |   |   |   |   |   |   |   |   |   |   |  |
| C-A-AA-----CA--GG Bacteria(100);Actinobacteria(100);Actinobacteria(100);unclassified(100);unclassified(100);unclassified(100);unclassified(100);unclassified(100);unclassified(100);                         |   |   |   |   |   |   |   |   |    |   |   |   |   |   |    |   |   |   |   |   |   |   |   |   |   |   |  |
| Otu1322                                                                                                                                                                                                      | 0 | 0 | 0 | 0 | 0 | 0 | 0 | 0 | 0  | 0 | 0 | 0 | 0 | 0 | 0  | 0 | 0 | 0 | 0 | 0 | 0 | 0 | 0 | 0 | 0 | 0 |  |
|                                                                                                                                                                                                              | 0 | 0 | 0 | 0 | 0 | 0 | 0 | 0 | 0  | 0 | 0 | 0 | 0 | 0 | 0  | 0 | 0 | 0 | 0 | 0 | 0 | 0 | 0 | 0 | 0 | 0 |  |
|                                                                                                                                                                                                              | 0 | 0 | 0 | 0 | 0 | 0 | 0 | 0 | 0  | 0 | 0 | 0 | 0 | 0 | 0  | 0 | 0 | 0 | 0 | 0 | 0 | 0 | 0 | 0 | 0 | 0 |  |
|                                                                                                                                                                                                              | 0 | 0 | 0 | 0 | 0 | 0 | 0 | 0 | 0  | 3 | 0 | 0 | 0 | 0 | 0  | 0 | 0 | 0 | 0 | 0 | 0 | 0 | 0 | 0 | 0 | 0 |  |
| M02255_76_000000000-ADUNE_1_2111_8688_15542 A---AC--GA-GG-AAG-----CCA-C-G----G-C-T--A-AC-T-ACG-TG-----CC-A-G-C-AG-CC-----GC-G---GT-AA-TA--C-----G-TA-G-G-C-G-----G-C-AAGCGT-T-----                           |   |   |   |   |   |   |   |   |    |   |   |   |   |   |    |   |   |   |   |   |   |   |   |   |   |   |  |
| GT---C-C-G-G-----A-C-T--T-TA--A-AA-GT--G-C-GG-G-G----CT-C-AA-----C-C-C-C-G-T-G-A---G-G-G-G--G-T-----C-CG-A-A--C-----T-G-A-CT-T-T-C---T-T-G-A-G-T-G--C-AG---GA-G-A-----G-G-G-A--AG-C-----GG--A-ATT---C-C-T-   |   |   |   |   |   |   |   |   |    |   |   |   |   |   |    |   |   |   |   |   |   |   |   |   |   |   |  |
| A-GT--GT-A-G-CG-GT--G---A-A-A---TG-C-GT-AG--AT-A-TT--A-G--G-A-A-G-A-AC-A-CC--AG--T-G-GC-GAA-G-G-C-G-----G-C-T-T-T--CTG-G-AC-T-G-----T-A--A-C-T-GA-CG-C-T-G--A-GG--C-T-CG-A--AA-G-C---T-AG--GG-T--AG-         |   |   |   |   |   |   |   |   |    |   |   |   |   |   |    |   |   |   |   |   |   |   |   |   |   |   |  |
| C-G-AA-----CG--GG Bacteria(100);Firmicutes(100);Clostridia(100);Clostridiales(100);Veillonellaceae(100);Megamonas(100);unclassified(100);unclassified(100);unclassified(100);                                |   |   |   |   |   |   |   |   |    |   |   |   |   |   |    |   |   |   |   |   |   |   |   |   |   |   |  |
| Otu1323                                                                                                                                                                                                      | 0 | 0 | 0 | 0 | 0 | 0 | 0 | 0 | 0  | 0 | 0 | 0 | 0 | 0 | 0  | 0 | 0 | 0 | 0 | 0 | 0 | 0 | 0 | 0 | 0 | 0 |  |
|                                                                                                                                                                                                              | 0 | 0 | 0 | 0 | 0 | 0 | 0 | 0 | 0  | 0 | 0 | 0 | 0 | 0 | 0  | 0 | 0 | 0 | 0 | 0 | 0 | 0 | 0 | 0 | 0 | 0 |  |
|                                                                                                                                                                                                              | 0 | 0 | 0 | 0 | 0 | 0 | 0 | 0 | 0  | 0 | 0 | 0 | 0 | 0 | 0  | 0 | 0 | 0 | 0 | 0 | 0 | 0 | 0 | 0 | 0 | 0 |  |
|                                                                                                                                                                                                              | 0 | 0 | 0 | 0 | 0 | 0 | 0 | 0 | 0  | 6 | 0 | 0 | 0 | 0 | 0  | 0 | 0 | 0 | 0 | 0 | 0 | 0 | 0 | 0 | 0 | 0 |  |
| M02255_77_000000000-ADUT3_1_1108_17632_14207 T---AC--GA-AG-GGG-----GCG-A-G----C-G-T--T-AT-T-CGG-AA-----TC-A-C-T-GG-GC-----GT--A---AA-GA-GT-GC-----G-TAGG---C-G-----G--T-TA-T-A-A---                          |   |   |   |   |   |   |   |   |    |   |   |   |   |   |    |   |   |   |   |   |   |   |   |   |   |   |  |
| -----AA---G-T                                                                                                                                                                                                |   |   |   |   |   |   |   |   |    |   |   |   |   |   |    |   |   |   |   |   |   |   |   |   |   |   |  |



|                                                                                                                                                                                                                                                                                                                                                                                                                                                                                                                                                                                                                                                                                                                                                                                                                    |   |   |   |   |   |   |   |   |   |   |   |   |   |   |   |    |   |   |   |   |   |   |   |   |   |   |   |
|--------------------------------------------------------------------------------------------------------------------------------------------------------------------------------------------------------------------------------------------------------------------------------------------------------------------------------------------------------------------------------------------------------------------------------------------------------------------------------------------------------------------------------------------------------------------------------------------------------------------------------------------------------------------------------------------------------------------------------------------------------------------------------------------------------------------|---|---|---|---|---|---|---|---|---|---|---|---|---|---|---|----|---|---|---|---|---|---|---|---|---|---|---|
| Otu1325                                                                                                                                                                                                                                                                                                                                                                                                                                                                                                                                                                                                                                                                                                                                                                                                            | 0 | 0 | 0 | 0 | 0 | 0 | 0 | 0 | 0 | 0 | 0 | 0 | 0 | 0 | 0 | 0  | 0 | 0 | 0 | 0 | 0 | 0 | 0 | 0 | 0 | 0 | 0 |
|                                                                                                                                                                                                                                                                                                                                                                                                                                                                                                                                                                                                                                                                                                                                                                                                                    | 0 | 0 | 0 | 0 | 0 | 0 | 0 | 0 | 0 | 0 | 0 | 0 | 0 | 0 | 0 | 0  | 0 | 0 | 0 | 0 | 0 | 0 | 0 | 0 | 0 | 0 | 0 |
|                                                                                                                                                                                                                                                                                                                                                                                                                                                                                                                                                                                                                                                                                                                                                                                                                    | 0 | 0 | 0 | 0 | 0 | 0 | 0 | 0 | 0 | 0 | 0 | 0 | 0 | 0 | 0 | 0  | 0 | 0 | 0 | 0 | 0 | 0 | 0 | 0 | 0 | 0 | 0 |
|                                                                                                                                                                                                                                                                                                                                                                                                                                                                                                                                                                                                                                                                                                                                                                                                                    | 0 | 0 | 0 | 0 | 0 | 0 | 0 | 0 | 0 | 4 | 0 | 0 | 0 | 0 | 0 | 0  | 0 | 0 | 0 | 0 | 0 | 0 | 0 | 0 | 0 | 0 | 0 |
| M02255_77_000000000-ADUT3_1_1110_6583_6697 T---AC---GA-AG-GGG-----GCT-A-G-----C-G-T---T-GC-T-CGG-AA-----TG-A-C-T--GG-GC-----GT-A---AA-GG-GC-GC-----G-TA-G-G-C-G-----G-C-GA-T-A-T-----CA---G-T-C-A-----G-A-T--G--TG--A-AA-TT--C-C-TG-G-G----CT-T-AA-----C-C-T-G-G-G-G-G-C---T-G--C-A--T-T-----T-GA-T-A--C-----G--G-T-AT-T-G-C---T-T-G-A-G-T-A--G-GG----AA-G-A-----G-G-G-T---CG-T-----GG-A--ATT---C-C-C-A-GT--GT-A-G-AG-GT--G---A-A-A---TT-C-GT-AG--AT-A-TT--G-G--G-A-A-G-A-AC-A-CC--GG--T-G--GC-GAA-G--G-C-G-----G--C-G-A-C---CTG--G--TC-C-T-----T-T---A-C-T-GA-CG-C-T-G--A-GG--C-G-CG-A--AA-G-C---G-TG--GG-G--AG-C-A-AA-----CA--GG Bacteria(100);Proteobacteria(100);Alphaproteobacteria(100);Rhodospirillales(100);Acetobacteraceae(100);unclassified(100);unclassified(100);unclassified(100);unclassified(100); |   |   |   |   |   |   |   |   |   |   |   |   |   |   |   |    |   |   |   |   |   |   |   |   |   |   |   |
| Otu1326                                                                                                                                                                                                                                                                                                                                                                                                                                                                                                                                                                                                                                                                                                                                                                                                            | 0 | 0 | 0 | 0 | 0 | 0 | 0 | 0 | 0 | 0 | 0 | 0 | 0 | 0 | 0 | 0  | 0 | 0 | 0 | 0 | 0 | 0 | 0 | 0 | 0 | 0 | 0 |
|                                                                                                                                                                                                                                                                                                                                                                                                                                                                                                                                                                                                                                                                                                                                                                                                                    | 0 | 0 | 0 | 0 | 0 | 0 | 0 | 0 | 0 | 0 | 0 | 0 | 0 | 0 | 0 | 0  | 0 | 0 | 0 | 0 | 0 | 0 | 0 | 0 | 0 | 0 | 0 |
|                                                                                                                                                                                                                                                                                                                                                                                                                                                                                                                                                                                                                                                                                                                                                                                                                    | 0 | 0 | 0 | 0 | 0 | 0 | 0 | 0 | 0 | 0 | 0 | 0 | 0 | 0 | 0 | 0  | 0 | 0 | 0 | 0 | 0 | 0 | 0 | 0 | 0 | 0 | 0 |
|                                                                                                                                                                                                                                                                                                                                                                                                                                                                                                                                                                                                                                                                                                                                                                                                                    | 0 | 0 | 0 | 0 | 0 | 0 | 0 | 0 | 0 | 8 | 0 | 0 | 0 | 0 | 0 | 0  | 0 | 0 | 0 | 0 | 0 | 0 | 0 | 0 | 0 | 0 | 0 |
| M02255_77_000000000-ADUT3_1_2113_26458_7201 T---AC---GT-AG-GGA-----GCA-A-G-----C-G-T---T--AT-C-CGG-AT-----TT-A-T-T--GG-GT-----GT--A---AA-GG-GT-GC-----G-TA-G-A-C-G-----G--G-AG-A-G-C-----AA---G-T-T-G-----G-T-T--G--TG--A-AA-TC--C-C-TC-G-G----CT-T-AA-----C-T-G-A-G-G-A-A-C---T-G--C-A--A-C-----C-AA-A-A--C-----T-A-T-TC--T-T-C---T-T-G-A-G-T-G--C-TG----GA-G-A-----G-G-A-A--AG-T-----GG-A--ATT---C-C-T-A-GT--GT-A-G-CG-GT--G---A-A-A---TG-C-GT-AG--AT-A-TT--A-G--G-A-G-G-A-AC-A-CC--AG--T-G--GC-GAA-G--G-C-G-----A-C-T-T-T---CTG--G--AC-A-G-----T-A--A-C-T-GA-CG-T-T-G--A-GG--C-A-CG-A--AA-G-T---G-TG--GG-G--AG-C-A-AA-----CA--GG Bacteria(100);Firmicutes(100);Clostridia(100);Clostridiales(100);Ruminococcaceae(100);uncultured(100);unclassified(100);unclassified(100);unclassified(100);                   |   |   |   |   |   |   |   |   |   |   |   |   |   |   |   |    |   |   |   |   |   |   |   |   |   |   |   |
| Otu1327                                                                                                                                                                                                                                                                                                                                                                                                                                                                                                                                                                                                                                                                                                                                                                                                            | 0 | 0 | 0 | 0 | 0 | 0 | 0 | 0 | 0 | 0 | 0 | 0 | 0 | 0 | 0 | 0  | 0 | 0 | 0 | 0 | 0 | 0 | 0 | 0 | 0 | 0 | 0 |
|                                                                                                                                                                                                                                                                                                                                                                                                                                                                                                                                                                                                                                                                                                                                                                                                                    | 0 | 0 | 0 | 0 | 0 | 0 | 0 | 0 | 0 | 0 | 0 | 0 | 0 | 0 | 0 | 0  | 0 | 0 | 0 | 0 | 0 | 0 | 0 | 0 | 0 | 0 | 0 |
|                                                                                                                                                                                                                                                                                                                                                                                                                                                                                                                                                                                                                                                                                                                                                                                                                    | 0 | 0 | 0 | 0 | 0 | 0 | 0 | 0 | 0 | 0 | 0 | 0 | 0 | 0 | 0 | 0  | 0 | 0 | 0 | 0 | 0 | 0 | 0 | 0 | 0 | 0 | 0 |
|                                                                                                                                                                                                                                                                                                                                                                                                                                                                                                                                                                                                                                                                                                                                                                                                                    | 0 | 0 | 0 | 0 | 0 | 0 | 0 | 0 | 0 | 6 | 0 | 0 | 0 | 0 | 0 | 0  | 0 | 0 | 0 | 0 | 0 | 0 | 0 | 0 | 0 | 0 | 0 |
| M02255_77_000000000-ADUT3_1_2119_24891_5946 T---AC---GA-AG-GGG-----GCT-A-G-----C-G-T---T--GC-T-CGG-AA-----TC-A-C-T--GG-GC-----GT-A---AA-GG-GC-GC-----G-TA-G-G-C-G-----G--C-CC-C-G-T-----TG---G-T-C-G-----G-G-C--G--TG--A-AA-TC--C-C-CG-G-G----CT-C-AA-----C-C-C-G-G-G-G-G-C---T-G--C-G--C-C-----C-GA-G-A--C-----G--G-C-GG-G-G-C---T-G-G-A-G-G-A--C-GG----GA-G-A-----G-G-C-T---CG-C-----GG-A--ATT---C-C-C-A-GT--GT-A-G-AG-GT--G---A-A-A---TT-C-GT-AG--AT-A-TT--G-G--G-A-A-G-A-AC-A-CC--GG--T-G--GC-GAA-G--G-C-G-----G--C-G-A-G---CTG--G--CC-C-G-----T-T---T-C-T-GA-CG-C-T-G--A-GG--C-G-CG-A--CA-G-C---G-TG--GG-G--AG-C-A-AA-----CA--GG Bacteria(100);Proteobacteria(100);Alphaproteobacteria(100);Rhodospirillales(100);unclassified(100);unclassified(100);unclassified(100);unclassified(100);unclassified(100);  |   |   |   |   |   |   |   |   |   |   |   |   |   |   |   |    |   |   |   |   |   |   |   |   |   |   |   |
| Otu1328                                                                                                                                                                                                                                                                                                                                                                                                                                                                                                                                                                                                                                                                                                                                                                                                            | 0 | 0 | 0 | 0 | 0 | 0 | 0 | 0 | 0 | 0 | 0 | 0 | 0 | 0 | 0 | 0  | 0 | 0 | 0 | 0 | 0 | 0 | 0 | 0 | 0 | 0 | 0 |
|                                                                                                                                                                                                                                                                                                                                                                                                                                                                                                                                                                                                                                                                                                                                                                                                                    | 0 | 0 | 0 | 0 | 0 | 0 | 0 | 0 | 0 | 0 | 0 | 0 | 0 | 0 | 0 | 0  | 0 | 0 | 0 | 0 | 0 | 0 | 0 | 0 | 0 | 0 | 0 |
|                                                                                                                                                                                                                                                                                                                                                                                                                                                                                                                                                                                                                                                                                                                                                                                                                    | 0 | 0 | 0 | 0 | 0 | 0 | 0 | 0 | 0 | 0 | 0 | 0 | 0 | 0 | 0 | 0  | 0 | 0 | 0 | 0 | 0 | 0 | 0 | 0 | 0 | 0 | 0 |
|                                                                                                                                                                                                                                                                                                                                                                                                                                                                                                                                                                                                                                                                                                                                                                                                                    | 0 | 0 | 0 | 0 | 0 | 0 | 0 | 0 | 0 | 0 | 0 | 0 | 0 | 0 | 0 | 58 | 0 | 0 | 0 | 0 | 0 | 0 | 0 | 0 | 0 | 0 | 0 |
| M02255_77_000000000-ADUT3_1_1103_17636_11519 C---AC---GT-AG-GGG-----GCG-A-G-----C-G-T---T--GT-C-CGG-AT-----TT-A-C-T--GG-GC-----GT--A---AA-GA-GC-GC-----G-TA-G-G-T-G-----G--T-TA-G-G-T-----AA---G-T-C-A-----                                                                                                                                                                                                                                                                                                                                                                                                                                                                                                                                                                                                        |   |   |   |   |   |   |   |   |   |   |   |   |   |   |   |    |   |   |   |   |   |   |   |   |   |   |   |



|                                                                                                                                                                                                                          |   |   |   |   |   |   |   |   |   |   |   |   |   |   |   |    |    |   |   |   |   |   |   |   |   |   |   |
|--------------------------------------------------------------------------------------------------------------------------------------------------------------------------------------------------------------------------|---|---|---|---|---|---|---|---|---|---|---|---|---|---|---|----|----|---|---|---|---|---|---|---|---|---|---|
| Otu1330                                                                                                                                                                                                                  | 0 | 0 | 0 | 0 | 0 | 0 | 0 | 0 | 0 | 0 | 0 | 0 | 0 | 0 | 0 | 0  | 0  | 0 | 0 | 0 | 0 | 0 | 0 | 0 | 0 | 0 | 0 |
|                                                                                                                                                                                                                          | 0 | 0 | 0 | 0 | 0 | 0 | 0 | 0 | 0 | 0 | 0 | 0 | 0 | 0 | 0 | 0  | 0  | 0 | 0 | 0 | 0 | 0 | 0 | 0 | 0 | 0 | 0 |
|                                                                                                                                                                                                                          | 0 | 0 | 0 | 0 | 0 | 0 | 0 | 0 | 0 | 0 | 0 | 0 | 0 | 0 | 0 | 0  | 0  | 0 | 0 | 0 | 0 | 0 | 0 | 0 | 0 | 0 | 0 |
|                                                                                                                                                                                                                          | 0 | 0 | 0 | 0 | 0 | 0 | 0 | 0 | 0 | 0 | 0 | 0 | 0 | 0 | 0 | 12 | 0  | 0 | 0 | 0 | 0 | 0 | 0 | 0 | 0 | 0 |   |
| M02255_77_000000000-ADUT3_1_2101_18503_17455 A---AC---GT-AG-GTT-----CCG-A-G-----C--G--T--T--AT-C-CGG-AT-----TT-A--C-T--GG-GC-----GT--A----AA-GC-GC-GT-----T-CA-G-G-C-G-----G--C-TG-G-T-C-----                            |   |   |   |   |   |   |   |   |   |   |   |   |   |   |   |    |    |   |   |   |   |   |   |   |   |   |   |
| ----AA---G-T-C-G-----G-G-C-A--TG--A-AA-GC--T-C-TC-G-G----CT-C-AA-----C-C-G-G-G-A-G--A-G---G-C-T-G--T--C-----C--GA-T-A--C-----T--G-A-TC--G-G-C---T-T-G-A-G-G--G---C-AG----TA-G-A-----G-G-G-T---GG-T-----GG--A--ATT----    |   |   |   |   |   |   |   |   |   |   |   |   |   |   |   |    |    |   |   |   |   |   |   |   |   |   |   |
| C-C-G-G-GT--GT-A-G-TG-GT--G---A--A-A---TG-C-GT-AG--AT-A-TC--C-G--G-A-G-G-A-AC-A-CC---AG--T--G--GC-GAA-A--G-C-G-----G--C-C-A-C---CTG--G--AC-T-G-----TA---C-C-T-GA--CG-C-T-C--A-AA--C-G-CG-A--AA-G-C---T-AG--GG-           |   |   |   |   |   |   |   |   |   |   |   |   |   |   |   |    |    |   |   |   |   |   |   |   |   |   |   |
| G--AG-C-G-AA-----CG--GG Bacteria(100);Chloroflexi(100);Anaerolineae(100);Anaerolineales(100);Anaerolineaceae(100);unclassified(100);unclassified(100);unclassified(100);unclassified(100);                               |   |   |   |   |   |   |   |   |   |   |   |   |   |   |   |    |    |   |   |   |   |   |   |   |   |   |   |
| Otu1331                                                                                                                                                                                                                  | 0 | 0 | 0 | 0 | 0 | 0 | 0 | 0 | 0 | 0 | 0 | 0 | 0 | 0 | 0 | 0  | 0  | 0 | 0 | 0 | 0 | 0 | 0 | 0 | 0 | 0 | 0 |
|                                                                                                                                                                                                                          | 0 | 0 | 0 | 0 | 0 | 0 | 0 | 0 | 0 | 0 | 0 | 0 | 0 | 0 | 0 | 0  | 0  | 0 | 0 | 0 | 0 | 0 | 0 | 0 | 0 | 0 | 0 |
|                                                                                                                                                                                                                          | 0 | 0 | 0 | 0 | 0 | 0 | 0 | 0 | 0 | 0 | 0 | 0 | 0 | 0 | 0 | 0  | 0  | 0 | 0 | 0 | 0 | 0 | 0 | 0 | 0 | 0 | 0 |
|                                                                                                                                                                                                                          | 0 | 0 | 0 | 0 | 0 | 0 | 0 | 0 | 0 | 0 | 0 | 0 | 0 | 0 | 0 | 12 | 0  | 0 | 0 | 0 | 0 | 0 | 0 | 0 | 0 | 0 |   |
| M02255_77_000000000-ADUT3_1_2104_18725_9767 T---AC---GT-AG-GGT-----CCG-A-G-----C--G--T--T--GT-C-CGG-AG-----TT-A--C-T--GG-GC-----GT--A----AA-GC-GC-GC-----G-CA-G-G-C-G-----G--T-TC-G-A-T-----AA-                          |   |   |   |   |   |   |   |   |   |   |   |   |   |   |   |    |    |   |   |   |   |   |   |   |   |   |   |
| ---G-A-C-T-----G-G-C-G--TG--A-AA-GC--C-C-CC-G-G----CT-C-AA-----C-C-G-G-G-A-G-G---G-T-C-G--T--T-----G--GT-G-A--C-----T--G-T-CG--G-A-C---T-T-G-A-A-G--A--C-AG----CA-G-G-----G-G-C-A--GG-T-----GG--A--ATT---C-C-C-          |   |   |   |   |   |   |   |   |   |   |   |   |   |   |   |    |    |   |   |   |   |   |   |   |   |   |   |
| GGT--GT-A-G-TG-GT--G---A--A-A---TG-C-GT-AG--AG-A-TC--G-G--G-A-G-G-A-AC-A-CC---CG--T--G--GC-GAA-G--G-C-----GG--C-C-T-G---CTG--G--GC-T-G-----G-T---C-T-T-GA--CG-C-T-G---AGG-C-G-CG---AA-GGC---G-T---GGGG--                 |   |   |   |   |   |   |   |   |   |   |   |   |   |   |   |    |    |   |   |   |   |   |   |   |   |   |   |
| AG-C-G-AA-----CG--GG Bacteria(100);Chloroflexi(100);Thermomicrobia(100);JG30-KF-CM45(100);unclassified(100);unclassified(100);unclassified(100);unclassified(100);unclassified(100);                                     |   |   |   |   |   |   |   |   |   |   |   |   |   |   |   |    |    |   |   |   |   |   |   |   |   |   |   |
| Otu1332                                                                                                                                                                                                                  | 0 | 0 | 0 | 0 | 0 | 0 | 0 | 0 | 0 | 0 | 0 | 0 | 0 | 0 | 0 | 0  | 0  | 0 | 0 | 0 | 0 | 0 | 0 | 0 | 0 | 0 | 0 |
|                                                                                                                                                                                                                          | 0 | 0 | 0 | 0 | 0 | 0 | 0 | 0 | 0 | 0 | 0 | 0 | 0 | 0 | 0 | 0  | 0  | 0 | 0 | 0 | 0 | 0 | 0 | 0 | 0 | 0 | 0 |
|                                                                                                                                                                                                                          | 0 | 0 | 0 | 0 | 0 | 0 | 0 | 0 | 0 | 0 | 0 | 0 | 0 | 0 | 0 | 0  | 0  | 0 | 0 | 0 | 0 | 0 | 0 | 0 | 0 | 0 | 0 |
|                                                                                                                                                                                                                          | 0 | 0 | 0 | 0 | 0 | 0 | 0 | 0 | 0 | 0 | 0 | 0 | 0 | 0 | 0 | 10 | 0  | 0 | 0 | 0 | 0 | 0 | 0 | 0 | 0 | 0 |   |
| M02255_77_000000000-ADUT3_1_1111_8533_13564 T---AC---GT-AG-GGG-----GCG-A-G-----C--G--T--T--GT-C-CGG-AA-----TG-A--C-T--GG-GC-----GT--A----AA-GG-GC-GT-----G-TA-G-G-C-G-----G--C-CG-A-C-T-----                             |   |   |   |   |   |   |   |   |   |   |   |   |   |   |   |    |    |   |   |   |   |   |   |   |   |   |   |
| AA---G-T-C-T-----G-A-T--G--TG--A-AA-TA--C-C-CG-C-T----TT-T-AA-----G-G-T-G-G-G-T--C-G---T-G--C-A--T--T-----G--GA-A-A--C-----T--G-G--AT--G-G-C---T-A-G-A-G-T--G---C-GG----AA-G-A-----G-G-T-A--AG-T-----GG--A--ATT---C-C-C- |   |   |   |   |   |   |   |   |   |   |   |   |   |   |   |    |    |   |   |   |   |   |   |   |   |   |   |
| A-GT--GT-A-G-CG-GT--G---A--A-A---TG-C-GT-AG--AG-A-TT--G-G--G-A-G-G-A-AC-A-CC---AG--T--G--GC-GAA-G--G-C-G-----A--C-T-T-A---CTG--G--GC-C-G-----C-A---A-C-T--GA--CG-C-T-G--A-GG--C-G-CG-A--AA-G-C---G-TG--GG-G--            |   |   |   |   |   |   |   |   |   |   |   |   |   |   |   |    |    |   |   |   |   |   |   |   |   |   |   |
| AG-C-A-AA-----CA--GG Bacteria(100);Firmicutes(100);unclassified(100);unclassified(100);unclassified(100);unclassified(100);unclassified(100);unclassified(100);unclassified(100);                                        |   |   |   |   |   |   |   |   |   |   |   |   |   |   |   |    |    |   |   |   |   |   |   |   |   |   |   |
| Otu1333                                                                                                                                                                                                                  | 0 | 0 | 0 | 0 | 0 | 0 | 0 | 0 | 0 | 0 | 0 | 0 | 0 | 0 | 0 | 0  | 0  | 0 | 0 | 0 | 0 | 0 | 0 | 0 | 0 | 0 | 0 |
|                                                                                                                                                                                                                          | 0 | 0 | 0 | 0 | 0 | 0 | 0 | 0 | 0 | 0 | 0 | 0 | 0 | 0 | 0 | 0  | 0  | 0 | 0 | 0 | 0 | 0 | 0 | 0 | 0 | 0 | 0 |
|                                                                                                                                                                                                                          | 0 | 0 | 0 | 0 | 0 | 0 | 0 | 0 | 0 | 0 | 0 | 0 | 0 | 0 | 0 | 0  | 0  | 0 | 0 | 0 | 0 | 0 | 0 | 0 | 0 | 0 | 0 |
|                                                                                                                                                                                                                          | 0 | 0 | 0 | 0 | 0 | 0 | 0 | 0 | 0 | 0 | 0 | 0 | 0 | 0 | 0 | 0  | 47 | 0 | 0 | 0 | 0 | 0 | 0 | 0 | 0 | 0 |   |
| M02255_77_000000000-ADUT3_1_1101_27369_11056 T---AC---GG-AG-GGA-----GCT-A-G-----C--G--T--T--GT-T-CGG-AA-----TT-A--C-T--GG-GC-----GT--A----AA-GC-GC-GC-----G-TA-G-G-C-G-----G--T-TT-T-T-C-----                            |   |   |   |   |   |   |   |   |   |   |   |   |   |   |   |    |    |   |   |   |   |   |   |   |   |   |   |
| ----AA---G-T-C-A-----G-G-G--G--TG--A-AA-GC--C-C-GG-A-G----CT-C-AA-----C-T-C-C-G-G-A--A-C---T-G--C-C--T--C-----T--GA-A-A--C-----T--G-G--AT--G-A-C---T-T-G-A-G-T--C---T-TG----GA-G-A-----G-G-T-C--AG-T-----GG--A--ATT---C- |   |   |   |   |   |   |   |   |   |   |   |   |   |   |   |    |    |   |   |   |   |   |   |   |   |   |   |
| C-G-A-GT--GT-A-G-AG-GT--G---A--A-A---TT-C-GT-AG--AT-A-TT--C-G--G-A-G-G-A-AC-A-CC---AG--T--G--GC-GAA-G--G-C-G-----A--C-T-G-A---CTG--G--AC-A-A-----G-T---A-C-T--GA--CG-C-T-G--A-GG--T-G-CG-A--AA-G-C---G-TG--GG-G--        |   |   |   |   |   |   |   |   |   |   |   |   |   |   |   |    |    |   |   |   |   |   |   |   |   |   |   |
| G--AG-C-A-AA-----CA--GG Bacteria(100);Proteobacteria(100);Alphaproteobacteria(100);Sphingomonadales(100);unclassified(100);unclassified(100);unclassified(100);unclassified(100);unclassified(100);                      |   |   |   |   |   |   |   |   |   |   |   |   |   |   |   |    |    |   |   |   |   |   |   |   |   |   |   |
| Otu1334                                                                                                                                                                                                                  | 0 | 0 | 0 | 0 | 0 | 0 | 0 | 0 | 0 | 0 | 0 | 0 | 0 | 0 | 0 | 0  | 0  | 0 | 0 | 0 | 0 | 0 | 0 | 0 | 0 | 0 | 0 |
|                                                                                                                                                                                                                          | 0 | 0 | 0 | 0 | 0 | 0 | 0 | 0 | 0 | 0 | 0 | 0 | 0 | 0 | 0 | 0  | 0  | 0 | 0 | 0 | 0 | 0 | 0 | 0 | 0 | 0 | 0 |
|                                                                                                                                                                                                                          | 0 | 0 | 0 | 0 | 0 | 0 | 0 | 0 | 0 | 0 | 0 | 0 | 0 | 0 | 0 | 0  | 0  | 0 | 0 | 0 | 0 | 0 | 0 | 0 | 0 | 0 | 0 |
|                                                                                                                                                                                                                          | 0 | 0 | 0 | 0 | 0 | 0 | 0 | 0 | 0 | 0 | 0 | 0 | 0 | 0 | 0 | 0  | 46 | 0 | 0 | 0 | 0 | 0 | 0 | 0 | 0 | 0 |   |
| M02255_77_000000000-ADUT3_1_1101_26441_16658 G---AC---GT-AG-GAT-----GCA-A-G-----C--G--T--T--GT-C-CGG-AT-----TT-A--T-T--GG-GC-----GT--A----AA-GA-GT-TC-----G-TA-G-G-C-G-----G--T-TC-G-T-T-----                            |   |   |   |   |   |   |   |   |   |   |   |   |   |   |   |    |    |   |   |   |   |   |   |   |   |   |   |
| ----AA---G-T-C-T-----G-A-T--G--TT--A-AA-GA--T-C-GG-G-G----CT-C-AA-----C-C-C-T-G-G-G--A-G---T-G--C-A--T--T-----G--GA-T-A--C-----T--G-G--CG--G-A-C---T-G-G-A-G-T--G---C-GG----TA-G-A-----G-G-C-T--AG-T-----GG--A--ATT---C- |   |   |   |   |   |   |   |   |   |   |   |   |   |   |   |    |    |   |   |   |   |   |   |   |   |   |   |
| C-C-A-GT--GT-A-G-CG-GT--G---A--A-A---TG-C-GT-AG--AT-A-TT--G-G--G-A-G-A-AC-A-CC---AG--T--G--GC-GTA-G--G-C-G-----A--C-T-A-G---CTG--G--GC-C-G-----T-A---A-C-T--GA--CG-C-T-G--A-GG--A-A-CG-A--AA-G-C---C-AG--GG-             |   |   |   |   |   |   |   |   |   |   |   |   |   |   |   |    |    |   |   |   |   |   |   |   |   |   |   |
| G--AG-C-G-AA-----TG--GG Bacteria(100);Cyanobacteria(100);MLE1-12(100);unclassified(100);unclassified(100);unclassified(100);unclassified(100);unclassified(100);unclassified(100);                                       |   |   |   |   |   |   |   |   |   |   |   |   |   |   |   |    |    |   |   |   |   |   |   |   |   |   |   |



|         |                                                                                                                                                                                                                                                                                                                                                                                                                                                                                                                                                                                                                                                                                                                                                                                                     |   |   |   |   |   |   |   |   |   |   |   |   |   |    |     |   |   |   |   |   |   |   |   |   |   |   |  |
|---------|-----------------------------------------------------------------------------------------------------------------------------------------------------------------------------------------------------------------------------------------------------------------------------------------------------------------------------------------------------------------------------------------------------------------------------------------------------------------------------------------------------------------------------------------------------------------------------------------------------------------------------------------------------------------------------------------------------------------------------------------------------------------------------------------------------|---|---|---|---|---|---|---|---|---|---|---|---|---|----|-----|---|---|---|---|---|---|---|---|---|---|---|--|
| Otu1335 | 0                                                                                                                                                                                                                                                                                                                                                                                                                                                                                                                                                                                                                                                                                                                                                                                                   | 0 | 0 | 0 | 0 | 0 | 0 | 0 | 0 | 0 | 0 | 0 | 0 | 0 | 0  | 0   | 0 | 0 | 0 | 0 | 0 | 0 | 0 | 0 | 0 | 0 | 0 |  |
|         | 0                                                                                                                                                                                                                                                                                                                                                                                                                                                                                                                                                                                                                                                                                                                                                                                                   | 0 | 0 | 0 | 0 | 0 | 0 | 0 | 0 | 0 | 0 | 0 | 0 | 0 | 0  | 0   | 0 | 0 | 0 | 0 | 0 | 0 | 0 | 0 | 0 | 0 | 0 |  |
|         | 0                                                                                                                                                                                                                                                                                                                                                                                                                                                                                                                                                                                                                                                                                                                                                                                                   | 0 | 0 | 0 | 0 | 0 | 0 | 0 | 0 | 0 | 0 | 0 | 0 | 0 | 0  | 0   | 0 | 0 | 0 | 0 | 0 | 0 | 0 | 0 | 0 | 0 | 0 |  |
|         | 0                                                                                                                                                                                                                                                                                                                                                                                                                                                                                                                                                                                                                                                                                                                                                                                                   | 0 | 0 | 0 | 0 | 0 | 0 | 0 | 0 | 0 | 0 | 0 | 0 | 0 | 0  | 161 | 0 | 0 | 0 | 0 | 0 | 0 | 0 | 0 | 0 | 0 | 0 |  |
|         | M02255_77_000000000-ADUT3_1_1101_26201_20236 T---AC---GG-AG-GGG-----GCT-A-G-----C-G-T---T-GT-T-CGG-AA-----TT-A-C-T--GG-GC-----GT-A-----AA-GG-GT-GC-----G-TA-G-G-C-G-----G-C-TG-T-T-C-----AA---G-T-C-A-----G-A-C-G-TG-A-AA-GG-C-C-TG-G-G----CT-C-AA-----C-C-T-G-G-G-A-A-C---T-G--C-G---T-T-----T-GA-G-A--C-----T-G-G-AC-G-G-C---T-T-G-A-G-T-C---C-GG---GA-G-A-----G-G-T-G---AG-C-----GG-A-ATT---C-C-C-A-GT--GT-A-G-AG-GT--G---A-A-A---TT-C-GT-AG--AT-A-TT--G-G-G-A-A-G-A-AC-A-CC--GG--T-G--GC-GAA-G-G-C-G-----G-C-T-C-A---CTG-G-AC-C-G-----G-T---A-C-T--GA-CG-C-T-G--A-GG-C-A-CG-A-AA-G-C---G-TG--GG-G--AG-C-A-AA-----CA--GG Bacteria(100);Proteobacteria(100);Alphaproteobacteria(100);unclassified(100);unclassified(100);unclassified(100);unclassified(100);unclassified(100);unclassified(100); |   |   |   |   |   |   |   |   |   |   |   |   |   |    |     |   |   |   |   |   |   |   |   |   |   |   |  |
| Otu1336 | 0                                                                                                                                                                                                                                                                                                                                                                                                                                                                                                                                                                                                                                                                                                                                                                                                   | 0 | 0 | 0 | 0 | 0 | 0 | 0 | 0 | 0 | 0 | 0 | 0 | 0 | 0  | 0   | 0 | 0 | 0 | 0 | 0 | 0 | 0 | 0 | 0 | 0 | 0 |  |
|         | 0                                                                                                                                                                                                                                                                                                                                                                                                                                                                                                                                                                                                                                                                                                                                                                                                   | 0 | 0 | 0 | 0 | 0 | 0 | 0 | 0 | 0 | 0 | 0 | 0 | 0 | 0  | 0   | 0 | 0 | 0 | 0 | 0 | 0 | 0 | 0 | 0 | 0 | 0 |  |
|         | 0                                                                                                                                                                                                                                                                                                                                                                                                                                                                                                                                                                                                                                                                                                                                                                                                   | 0 | 0 | 0 | 0 | 0 | 0 | 0 | 0 | 0 | 0 | 0 | 0 | 0 | 0  | 0   | 0 | 0 | 0 | 0 | 0 | 0 | 0 | 0 | 0 | 0 | 0 |  |
|         | 0                                                                                                                                                                                                                                                                                                                                                                                                                                                                                                                                                                                                                                                                                                                                                                                                   | 0 | 0 | 0 | 0 | 0 | 0 | 0 | 0 | 0 | 0 | 0 | 0 | 0 | 0  | 60  | 0 | 0 | 0 | 0 | 0 | 0 | 0 | 0 | 0 | 0 | 0 |  |
|         | M02255_77_000000000-ADUT3_1_1102_27452_16424 T---AC---GA-AG-GGG-----GCT-A-G-----C-G-T---T-GT-T-CGG-AA-----TT-A-C-T--GG-GC-----GT-A-----AA-GC-GC-GT-----G-TA-G-G-C-G-----G-G-CT-T-T-T-----AA---G-T-C-A-----G-G-G--G-TG-A-AA-TG-C-C-AA-G-G----CT-C-AA-----C-C-T-T-G-G-A-A-C---T-G--C-C---T-T-----T-GA-T-A--C-----T-G-G-AA-G-T-C---T-T-G-A-G-T-C---C-GG---GA-G-A-----G-G-T-G---AG-T-----GG-A-ACT---G-C-G-A-GT--GT-A-G-AG-GT--G---A-A-A---TT-C-GT-AG--AT-A-TT--C-G--C-A-A-G-A-AC-A-CC--AG--T-G--GC-GAA-G-G-C-G-----G-C-T-C-A---CTG-G-CC-C-G-----G-A--A-C-T--GA-CG-C-T-G--A-GA-C-G-CG-A-AA-G-C---G-TG--GG-G--AG-C-A-AA-----CA--GG Bacteria(100);Proteobacteria(100);Alphaproteobacteria(100);Rhizobiales(100);unclassified(100);unclassified(100);unclassified(100);unclassified(100);unclassified(100); |   |   |   |   |   |   |   |   |   |   |   |   |   |    |     |   |   |   |   |   |   |   |   |   |   |   |  |
| Otu1337 | 0                                                                                                                                                                                                                                                                                                                                                                                                                                                                                                                                                                                                                                                                                                                                                                                                   | 0 | 0 | 0 | 0 | 0 | 0 | 0 | 0 | 0 | 0 | 0 | 0 | 0 | 0  | 0   | 0 | 0 | 0 | 0 | 0 | 0 | 0 | 0 | 0 | 0 | 0 |  |
|         | 0                                                                                                                                                                                                                                                                                                                                                                                                                                                                                                                                                                                                                                                                                                                                                                                                   | 0 | 0 | 0 | 0 | 0 | 0 | 0 | 0 | 0 | 0 | 0 | 0 | 0 | 0  | 0   | 0 | 0 | 0 | 0 | 0 | 0 | 0 | 0 | 0 | 0 | 0 |  |
|         | 0                                                                                                                                                                                                                                                                                                                                                                                                                                                                                                                                                                                                                                                                                                                                                                                                   | 0 | 0 | 0 | 0 | 0 | 0 | 0 | 0 | 0 | 0 | 0 | 0 | 0 | 0  | 0   | 0 | 0 | 0 | 0 | 0 | 0 | 0 | 0 | 0 | 0 | 0 |  |
|         | 0                                                                                                                                                                                                                                                                                                                                                                                                                                                                                                                                                                                                                                                                                                                                                                                                   | 0 | 0 | 0 | 0 | 0 | 0 | 0 | 0 | 0 | 0 | 0 | 0 | 0 | 28 | 0   | 0 | 0 | 0 | 0 | 0 | 0 | 0 | 0 | 0 | 0 | 0 |  |
|         | M02255_77_000000000-ADUT3_1_2101_18250_10192 T---AC---GT-AA-GGG-----GCG-A-G-----C-G-T---T-GT-C-CGG-AA-----TT-A-T-T--GG-GC-----GT-A-----AA-GG-GT-TC-----G-CA-G-G-C-G-----G-C-CT-A-T-T-----AA---G-T-C-A-----G-A-T-G--TT-A-AA-TC--T-C-AT-G-G----CC-T-AA-----C-C-A-T-G-A-T--A-----A-G--C-A---T-T-----T-GA-A-A--C-----T-G-A-AA--G-G-C---T-T-G-A-G-T-T---A-AG---GA-G-A-----G-G-A-A--AG-T-----GG-A-ATT---C-C-T-A-GT--GT-A-G-CG-GT--G---A-A-A---TG-C-GT-AG--AT-A-TT--A-G--G-A-G-G-A-AT-A-CC--AG--T-G--GC-GAA-G-G-C-G-----A-C-T-T-T---CTG-G-AC-T-T-----A-T---A-C-T--GA-CG-C-T-G--A-GG--A-A-CG-A-AA-G-C---A-TG--GG-T--AG-C-A-AA-----CA--GG Bacteria(100);Firmicutes(100);Clostridia(100);Clostridiales(100);unclassified(100);unclassified(100);unclassified(100);unclassified(100);unclassified(100);        |   |   |   |   |   |   |   |   |   |   |   |   |   |    |     |   |   |   |   |   |   |   |   |   |   |   |  |
| Otu1338 | 0                                                                                                                                                                                                                                                                                                                                                                                                                                                                                                                                                                                                                                                                                                                                                                                                   | 0 | 0 | 0 | 0 | 0 | 0 | 0 | 0 | 0 | 0 | 0 | 0 | 0 | 0  | 0   | 0 | 0 | 0 | 0 | 0 | 0 | 0 | 0 | 0 | 0 | 0 |  |
|         | 0                                                                                                                                                                                                                                                                                                                                                                                                                                                                                                                                                                                                                                                                                                                                                                                                   | 0 | 0 | 0 | 0 | 0 | 0 | 0 | 0 | 0 | 0 | 0 | 0 | 0 | 0  | 0   | 0 | 0 | 0 | 0 | 0 | 0 | 0 | 0 | 0 | 0 | 0 |  |
|         | 0                                                                                                                                                                                                                                                                                                                                                                                                                                                                                                                                                                                                                                                                                                                                                                                                   | 0 | 0 | 0 | 0 | 0 | 0 | 0 | 0 | 0 | 0 | 0 | 0 | 0 | 0  | 0   | 0 | 0 | 0 | 0 | 0 | 0 | 0 | 0 | 0 | 0 | 0 |  |
|         | 0                                                                                                                                                                                                                                                                                                                                                                                                                                                                                                                                                                                                                                                                                                                                                                                                   | 0 | 0 | 0 | 0 | 0 | 0 | 0 | 0 | 0 | 0 | 0 | 0 | 0 | 0  | 41  | 0 | 0 | 0 | 0 | 0 | 0 | 0 | 0 | 0 | 0 | 0 |  |
|         | M02255_77_000000000-ADUT3_1_1103_19570_18641 G---AC---AG-AG-GTG-----CCG-A-G-----C-G-T---T-AG-G-CGG-AA-----TC-A-C-T--GG-GC-----TT-A-----AA-GC-GT-GT-----G-TA-G-G-C-G-----G-A-CC-G-T-T-----AA---G-T-A-C-----C-T-T-G--TG-A-AA-TC--C-C-AC-G-G----CT-C-AA-----C-C                                                                                                                                                                                                                                                                                                                                                                                                                                                                                                                                        |   |   |   |   |   |   |   |   |   |   |   |   |   |    |     |   |   |   |   |   |   |   |   |   |   |   |  |



|                                                                                                                                                                                                                                                                                                                                                                                                                                                                                                                                                                                                                                                                                                                                                                                                                                  |   |   |   |   |   |   |   |   |   |   |   |   |   |   |   |    |    |   |   |   |   |   |   |   |   |   |   |
|----------------------------------------------------------------------------------------------------------------------------------------------------------------------------------------------------------------------------------------------------------------------------------------------------------------------------------------------------------------------------------------------------------------------------------------------------------------------------------------------------------------------------------------------------------------------------------------------------------------------------------------------------------------------------------------------------------------------------------------------------------------------------------------------------------------------------------|---|---|---|---|---|---|---|---|---|---|---|---|---|---|---|----|----|---|---|---|---|---|---|---|---|---|---|
| Otu1340                                                                                                                                                                                                                                                                                                                                                                                                                                                                                                                                                                                                                                                                                                                                                                                                                          | 0 | 0 | 0 | 0 | 0 | 0 | 0 | 0 | 0 | 0 | 0 | 0 | 0 | 0 | 0 | 0  | 0  | 0 | 0 | 0 | 0 | 0 | 0 | 0 | 0 | 0 | 0 |
|                                                                                                                                                                                                                                                                                                                                                                                                                                                                                                                                                                                                                                                                                                                                                                                                                                  | 0 | 0 | 0 | 0 | 0 | 0 | 0 | 0 | 0 | 0 | 0 | 0 | 0 | 0 | 0 | 0  | 0  | 0 | 0 | 0 | 0 | 0 | 0 | 0 | 0 | 0 | 0 |
|                                                                                                                                                                                                                                                                                                                                                                                                                                                                                                                                                                                                                                                                                                                                                                                                                                  | 0 | 0 | 0 | 0 | 0 | 0 | 0 | 0 | 0 | 0 | 0 | 0 | 0 | 0 | 0 | 0  | 0  | 0 | 0 | 0 | 0 | 0 | 0 | 0 | 0 | 0 | 0 |
|                                                                                                                                                                                                                                                                                                                                                                                                                                                                                                                                                                                                                                                                                                                                                                                                                                  | 0 | 0 | 0 | 0 | 0 | 0 | 0 | 0 | 0 | 0 | 0 | 0 | 0 | 0 | 0 | 37 | 0  | 0 | 0 | 0 | 0 | 0 | 0 | 0 | 0 | 0 | 0 |
| M02255_77_000000000-ADUT3_1_1106_13113_22549 T---AC---GT-AG-GGG-----GCG-A-G-----C-G-T---T-GT-C-CGG-AA-----TT-A-C-T--GG-GC-----GT--A---AA-GC-GC-GC-----G-TA-G-G-T-G-----G-T-TT-T-C-T-----AA---G-A-C-C-----G-A-T-G--TG-A-AA-TC--T-C-CG-C-G----CT-T-AC-----C-G-T-G-G-A-G--A-G---G-T-C-G---T-T-----G--GT-G-A--C-----T-G-G-GA-G-A-C---T-T-G-A-G-T-T--T-GG----CA-G-A-----G-G-T-G---AG-T-----GG--A--ATT-----C-C-C-G-GT--GG-A-G-CG-GT--G---A--A-A---TG-C-GT-AG--AG-A-TC--G-G--G-A-G-G-A-AC-A-CC---AG--T--G--GC-GAA-G--G-C-G-----G--C-T-C-A---CTG--G--GC-C-A-----T-G---A-C-T--GA--CG-C-T-G--A-GG--C-G-CG-A--AA-G-C---G-TG--GG-G--AG-C-G-AA-----CC--GG Bacteria(100);unclassified(100);unclassified(100);unclassified(100);unclassified(100);unclassified(100);unclassified(100);unclassified(100);unclassified(100);                      |   |   |   |   |   |   |   |   |   |   |   |   |   |   |   |    |    |   |   |   |   |   |   |   |   |   |   |
| Otu1341                                                                                                                                                                                                                                                                                                                                                                                                                                                                                                                                                                                                                                                                                                                                                                                                                          | 0 | 0 | 0 | 0 | 0 | 0 | 0 | 0 | 0 | 0 | 0 | 0 | 0 | 0 | 0 | 0  | 0  | 0 | 0 | 0 | 0 | 0 | 0 | 0 | 0 | 0 | 0 |
|                                                                                                                                                                                                                                                                                                                                                                                                                                                                                                                                                                                                                                                                                                                                                                                                                                  | 0 | 0 | 0 | 0 | 0 | 0 | 0 | 0 | 0 | 0 | 0 | 0 | 0 | 0 | 0 | 0  | 0  | 0 | 0 | 0 | 0 | 0 | 0 | 0 | 0 | 0 | 0 |
|                                                                                                                                                                                                                                                                                                                                                                                                                                                                                                                                                                                                                                                                                                                                                                                                                                  | 0 | 0 | 0 | 0 | 0 | 0 | 0 | 0 | 0 | 0 | 0 | 0 | 0 | 0 | 0 | 0  | 0  | 0 | 0 | 0 | 0 | 0 | 0 | 0 | 0 | 0 | 0 |
|                                                                                                                                                                                                                                                                                                                                                                                                                                                                                                                                                                                                                                                                                                                                                                                                                                  | 0 | 0 | 0 | 0 | 0 | 0 | 0 | 0 | 0 | 0 | 0 | 0 | 0 | 0 | 0 | 20 | 0  | 0 | 0 | 0 | 0 | 0 | 0 | 0 | 0 | 0 | 0 |
| M02255_76_000000000-ADUNE_1_1107_15193_10923 T---AC---GG-AG-GGT-----GCA-A-G-----C-G-T---T-AC-C-CGG-AA-----TC-A-----C-----T-----GG-GC-----G---G--G-----G---A-C-T-T-----AA---G-T-C-T-----G-G-C--T--TT--A-AA-GA--C-A-GC-G-G----CT-C-AA-----C-C-G-C-T-G-G--A-A---T-G--G-G---C-T-----G--GG-T-A--C-----T--G-G-GT--T-T-C---T-T-G-A-C-C--T--C-TG----GA-G-A-----G-G-A-A--GC-T-----GG--A--ATT---C-C-T-G-GT--GT-A-G-CG-GT--G---G--A-A---TG-C-GT-AG--AT-A-CC--A-G--G-A-G-G-A-AC-A-CC---AA--T--G--GC-GAA-G--G-C-A-----G--G-C-T-T---CTG--G--AC-A-G-----A-A--G-G-T--GA--CG-C-T-G--A-GG--C-G-CG-A--AA-G-T---G-TG--GG-G--AG-C-G-AA-----CC--GG Bacteria(100);unclassified(100);unclassified(100);unclassified(100);unclassified(100);unclassified(100);unclassified(100);unclassified(100);unclassified(100);                                      |   |   |   |   |   |   |   |   |   |   |   |   |   |   |   |    |    |   |   |   |   |   |   |   |   |   |   |
| Otu1342                                                                                                                                                                                                                                                                                                                                                                                                                                                                                                                                                                                                                                                                                                                                                                                                                          | 0 | 0 | 0 | 0 | 0 | 0 | 0 | 0 | 0 | 0 | 0 | 0 | 0 | 0 | 0 | 0  | 0  | 0 | 0 | 0 | 0 | 0 | 0 | 0 | 0 | 0 | 0 |
|                                                                                                                                                                                                                                                                                                                                                                                                                                                                                                                                                                                                                                                                                                                                                                                                                                  | 0 | 0 | 0 | 0 | 0 | 0 | 0 | 0 | 0 | 0 | 0 | 0 | 0 | 0 | 0 | 0  | 0  | 0 | 0 | 0 | 0 | 0 | 0 | 0 | 0 | 0 | 0 |
|                                                                                                                                                                                                                                                                                                                                                                                                                                                                                                                                                                                                                                                                                                                                                                                                                                  | 0 | 0 | 0 | 0 | 0 | 0 | 0 | 0 | 0 | 0 | 0 | 0 | 0 | 0 | 0 | 0  | 0  | 0 | 0 | 0 | 0 | 0 | 0 | 0 | 0 | 0 | 0 |
|                                                                                                                                                                                                                                                                                                                                                                                                                                                                                                                                                                                                                                                                                                                                                                                                                                  | 0 | 0 | 0 | 0 | 0 | 0 | 0 | 0 | 0 | 0 | 0 | 0 | 0 | 0 | 0 | 0  | 56 | 0 | 0 | 0 | 0 | 0 | 0 | 0 | 0 | 0 | 0 |
| M02255_77_000000000-ADUT3_1_1101_3831_13729 T---AC---GA-AG-GGG-----GCT-A-G-----C-G-T---T--GC-T-CGG-AA-----TG-A--C-T--GG-GC-----GT--A---AA-GG-GC-GC-----G-TA-G-G-C-G-----G-T-TT-G-A-A-----CA---G-T-T-G-----G-G-C--G--TG--A-AA-TT--C-C-AG-G-G----CT-T-AA-----C-C-T-T-G-G-G--A-C---T-G--C-G---T-T-----C--AA-T-A--C-----G--T-T--TA--G-A-C---T-T-G-A-G-T-T--C-GG----AA-G-A-----G-G-G-T---CG-T-----GG--A--ATT---C-C-C-A-GT--GT-A-G-AG-GT--G---A--A-A---TT-C-GT-AG--AT-A-TT--G-G--G-A-A-G-A-AC-A-CC---GG--T--G--GC-GAA-G--G-C-G-----G--C-G-A-C---CTG--G--TC-C-G-----A-A--A-C-T--GA--CG-C-T-G--A-GG--C-G-CG-A--AA-G-C---G-TG--GG-G--AG-C-A-AA-----CA--GG Bacteria(100);Proteobacteria(100);Alphaproteobacteria(100);Rhodospirillales(100);Acetobacteraceae(100);unclassified(100);unclassified(100);unclassified(100);unclassified(100); |   |   |   |   |   |   |   |   |   |   |   |   |   |   |   |    |    |   |   |   |   |   |   |   |   |   |   |
| Otu1343                                                                                                                                                                                                                                                                                                                                                                                                                                                                                                                                                                                                                                                                                                                                                                                                                          | 0 | 0 | 0 | 0 | 0 | 0 | 0 | 0 | 0 | 0 | 0 | 0 | 0 | 0 | 0 | 0  | 0  | 0 | 0 | 0 | 0 | 0 | 0 | 0 | 0 | 0 | 0 |
|                                                                                                                                                                                                                                                                                                                                                                                                                                                                                                                                                                                                                                                                                                                                                                                                                                  | 0 | 0 | 0 | 0 | 0 | 0 | 0 | 0 | 0 | 0 | 0 | 0 | 0 | 0 | 0 | 0  | 0  | 0 | 0 | 0 | 0 | 0 | 0 | 0 | 0 | 0 | 0 |
|                                                                                                                                                                                                                                                                                                                                                                                                                                                                                                                                                                                                                                                                                                                                                                                                                                  | 0 | 0 | 0 | 0 | 0 | 0 | 0 | 0 | 0 | 0 | 0 | 0 | 0 | 0 | 0 | 0  | 0  | 0 | 0 | 0 | 0 | 0 | 0 | 0 | 0 | 0 | 0 |
|                                                                                                                                                                                                                                                                                                                                                                                                                                                                                                                                                                                                                                                                                                                                                                                                                                  | 0 | 0 | 0 | 0 | 0 | 0 | 0 | 0 | 0 | 0 | 0 | 0 | 0 | 0 | 0 | 0  | 30 | 0 | 0 | 0 | 0 | 0 | 0 | 0 | 0 | 0 | 0 |
| M02255_77_000000000-ADUT3_1_1103_10669_14002 T---AC---GA-GG-GGG-----GCA-A-G-----C-G-T---T--GT-T-CGG-AA-----TT-A--T-T--GG-GC-----GT--A---AA-GG-GC-GC-----G-TA-G-G-C-G-----G-T-GC-G-G-T-----AA---G-T-C-A-----C-C-T-G--TG--A-AA-TC--T-C-                                                                                                                                                                                                                                                                                                                                                                                                                                                                                                                                                                                            |   |   |   |   |   |   |   |   |   |   |   |   |   |   |   |    |    |   |   |   |   |   |   |   |   |   |   |



|                                                                                                                                                                                                                                                                                                                                                                                                                                                                                                                                                                                                                                                                                                                                                                                                                                                            |   |   |   |   |   |   |   |   |   |   |   |   |   |   |    |   |   |    |   |   |   |   |   |   |   |   |   |
|------------------------------------------------------------------------------------------------------------------------------------------------------------------------------------------------------------------------------------------------------------------------------------------------------------------------------------------------------------------------------------------------------------------------------------------------------------------------------------------------------------------------------------------------------------------------------------------------------------------------------------------------------------------------------------------------------------------------------------------------------------------------------------------------------------------------------------------------------------|---|---|---|---|---|---|---|---|---|---|---|---|---|---|----|---|---|----|---|---|---|---|---|---|---|---|---|
| Otu1345                                                                                                                                                                                                                                                                                                                                                                                                                                                                                                                                                                                                                                                                                                                                                                                                                                                    | 0 | 0 | 0 | 0 | 0 | 0 | 0 | 0 | 0 | 0 | 0 | 0 | 0 | 0 | 0  | 0 | 0 | 0  | 0 | 0 | 0 | 0 | 0 | 0 | 0 | 0 | 0 |
|                                                                                                                                                                                                                                                                                                                                                                                                                                                                                                                                                                                                                                                                                                                                                                                                                                                            | 0 | 0 | 0 | 0 | 0 | 0 | 0 | 0 | 0 | 0 | 0 | 0 | 0 | 0 | 0  | 0 | 0 | 0  | 0 | 0 | 0 | 0 | 0 | 0 | 0 | 0 | 0 |
|                                                                                                                                                                                                                                                                                                                                                                                                                                                                                                                                                                                                                                                                                                                                                                                                                                                            | 0 | 0 | 0 | 0 | 0 | 0 | 0 | 0 | 0 | 0 | 0 | 0 | 0 | 0 | 0  | 0 | 0 | 0  | 0 | 0 | 3 | 0 | 0 | 0 | 0 | 0 | 0 |
|                                                                                                                                                                                                                                                                                                                                                                                                                                                                                                                                                                                                                                                                                                                                                                                                                                                            | 0 | 0 | 0 | 0 | 0 | 0 | 0 | 0 | 0 | 0 | 0 | 0 | 0 | 0 | 0  | 0 | 0 | 0  | 0 | 0 | 0 | 0 | 0 | 0 | 0 |   |   |
| M02255_76_000000000-ADUNE_1_1105_27429_5980 C---CG---GC-TA-ACT-----CCG-T-G-----C--C--A--G--CA-G-CCG-CG-----GT-A--A-T--AC-GG-----AG--G-----GT-GC-AA-AC-----G-TT-GCT-C-G-----G--A-CC-A-T-C-----AA-<br>---G-T-C-G-----G-A-T--G--TG--A-AA-TC--C-C-TC-G-G-----CT-T-AA-----C-C-G-A-G-G-A--C-G---T-G--C-A---T--T-----C--GA-A-A---C-----T--G-C--TG--G-C-C---T-T-G-A-G-T--A---C-GA---CA-G-A-----G-G-A-T---CG-C-----GG--A--ATT---C-C-C-G-<br>GT--GT-A-G-AG-GT--G---A--A-A---TT-C-GT-AG--AT-A-TC--G-G--G-A-G-G-A-AC-A-CC---AG--T--G--GC-GAA-G--G-C-G-----G--C-G-A-T---CTG--G--GT-C-G-----A-T---A-C-T--GA--CG-C-T-G--A-GG--T-G-CG-A--AA-G-C---G-TG--GG-G--AG-<br>C-A-AA-----CA--GG Bacteria(100);Proteobacteria(100);Deltaproteobacteria(100);unclassified(100);unclassified(100);unclassified(100);unclassified(100);unclassified(100);unclassified(100);             |   |   |   |   |   |   |   |   |   |   |   |   |   |   |    |   |   |    |   |   |   |   |   |   |   |   |   |
| Otu1346                                                                                                                                                                                                                                                                                                                                                                                                                                                                                                                                                                                                                                                                                                                                                                                                                                                    | 0 | 0 | 0 | 0 | 0 | 0 | 0 | 0 | 0 | 0 | 0 | 0 | 0 | 0 | 0  | 0 | 0 | 0  | 0 | 0 | 0 | 0 | 0 | 0 | 0 | 0 | 0 |
|                                                                                                                                                                                                                                                                                                                                                                                                                                                                                                                                                                                                                                                                                                                                                                                                                                                            | 0 | 0 | 0 | 0 | 0 | 0 | 0 | 0 | 0 | 0 | 0 | 0 | 0 | 0 | 0  | 0 | 0 | 0  | 0 | 0 | 0 | 0 | 0 | 0 | 0 | 0 | 0 |
|                                                                                                                                                                                                                                                                                                                                                                                                                                                                                                                                                                                                                                                                                                                                                                                                                                                            | 0 | 0 | 0 | 0 | 0 | 0 | 0 | 0 | 0 | 0 | 0 | 0 | 0 | 0 | 0  | 0 | 0 | 0  | 0 | 0 | 0 | 0 | 0 | 0 | 0 | 0 | 0 |
|                                                                                                                                                                                                                                                                                                                                                                                                                                                                                                                                                                                                                                                                                                                                                                                                                                                            | 0 | 0 | 0 | 0 | 0 | 0 | 0 | 0 | 0 | 0 | 0 | 0 | 0 | 0 | 12 | 0 | 0 | 0  | 0 | 0 | 0 | 0 | 0 | 0 | 0 | 0 | 0 |
| M02255_77_000000000-ADUT3_1_1108_7045_17060 G---AC---AG-AG-GTC-----CCG-A-G-----C--G--T---T--AG-G-CGG-AA-----TC-A--C-T--GG-GC-----TT--A-----AA-GC-GT-GT-----G-TA-G-G-C-G-----G--A-TG-C-C-T-----<br>AA---G-T-A-C-----C-T-T--G--TG--A-AA-TC--C-C-AC-G-G-----CT-C-AC-----C-C-G-T-G-G-A--A-C---T-G--C-T---T--G-----G--TA-T-A---C-----T--G-G--GT--G-T-C---T-T-G-A-G-C--C---A-CT---TA-G-G-----G-G-C-T---AC-C-----GG--A--ACA---A-A-T-<br>G-GT--GG-A-G-CG-GT--G---A--A-A---TG-C-GT-AG--AT-A-TC--A-T--T-T-G-G-A-AC-G-CC---AA--T--G--GT-GAA-A--A-C-A-----G--G-T-A-G---CTG--G--GA-G-T-----G-T---G-C-T--GA--CG-C-T-G--A-GA--C-A-CG-A--AA-G-C---C-AG--GG-G--<br>AG-C-A-AA-----CG--GG Bacteria(100);Planctomycetes(100);Phycisphaerae(100);WD2101(100);unclassified(100);unclassified(100);unclassified(100);unclassified(100);unclassified(100);                         |   |   |   |   |   |   |   |   |   |   |   |   |   |   |    |   |   |    |   |   |   |   |   |   |   |   |   |
| Otu1347                                                                                                                                                                                                                                                                                                                                                                                                                                                                                                                                                                                                                                                                                                                                                                                                                                                    | 0 | 0 | 0 | 0 | 0 | 0 | 0 | 0 | 0 | 0 | 0 | 0 | 0 | 0 | 0  | 0 | 0 | 0  | 0 | 0 | 0 | 0 | 0 | 0 | 0 | 0 | 0 |
|                                                                                                                                                                                                                                                                                                                                                                                                                                                                                                                                                                                                                                                                                                                                                                                                                                                            | 0 | 0 | 0 | 0 | 0 | 0 | 0 | 0 | 0 | 0 | 0 | 0 | 0 | 0 | 0  | 0 | 0 | 0  | 0 | 0 | 0 | 0 | 0 | 0 | 0 | 0 | 0 |
|                                                                                                                                                                                                                                                                                                                                                                                                                                                                                                                                                                                                                                                                                                                                                                                                                                                            | 0 | 0 | 0 | 0 | 0 | 0 | 0 | 0 | 0 | 0 | 0 | 0 | 0 | 0 | 0  | 0 | 0 | 0  | 0 | 0 | 0 | 0 | 0 | 0 | 0 | 0 | 0 |
|                                                                                                                                                                                                                                                                                                                                                                                                                                                                                                                                                                                                                                                                                                                                                                                                                                                            | 0 | 0 | 0 | 0 | 0 | 0 | 0 | 0 | 0 | 0 | 0 | 0 | 0 | 0 | 22 | 0 | 0 | 0  | 0 | 0 | 0 | 0 | 0 | 0 | 0 | 0 | 0 |
| M02255_77_000000000-ADUT3_1_1106_15327_19254 T---AC---GA-AG-GGG-----GCT-A-G-----C--G--T---T--GC-T-CGG-AA-----TG-A--C-T--GG-GC-----GT--A-----AA-GG-GC-GC-----G-TA-G-G-C-G-----G--C-TC-A-T-A---<br>-----CA---G-T-C-A-----G-G-C--G--TG--A-AA-TT--C-C-TG-G-G-----CT-C-AA-----C-C-T-G-G-G-G--A-C---T-G--C-G---C--T-----T--GA-G-A---C-----G--T-G--TG--G-G-C---T-T-G-A-G-T--G---G-GG---AA-G-A-----G-G-G-T---CG-T-----GG--A--ATT---<br>C-C-C-A-GT--GT-A-G-AG-GT--G---A--A-A---TT-C-GT-AG--AT-A-TT--G-G--G-A-A-G-A-AC-A-CC---GG--T--G--GC-GAA-G--G-C-G-----G--C-G-A-C---CTG--G--TC-C-T-----T-G---A-C-T--GA--CG-C-T-G--A-GG--C-G-CG-A--AA-G-C---G-TG--<br>GG-G--AG-C-A-AA-----CA--GG Bacteria(100);Proteobacteria(100);Alphaproteobacteria(100);Rhodospirillales(100);Acetobacteraceae(100);unclassified(100);unclassified(100);unclassified(100);unclassified(100); |   |   |   |   |   |   |   |   |   |   |   |   |   |   |    |   |   |    |   |   |   |   |   |   |   |   |   |
| Otu1348                                                                                                                                                                                                                                                                                                                                                                                                                                                                                                                                                                                                                                                                                                                                                                                                                                                    | 0 | 0 | 0 | 0 | 0 | 0 | 0 | 0 | 0 | 0 | 0 | 0 | 0 | 0 | 0  | 0 | 0 | 0  | 0 | 0 | 0 | 0 | 0 | 0 | 0 | 0 | 0 |
|                                                                                                                                                                                                                                                                                                                                                                                                                                                                                                                                                                                                                                                                                                                                                                                                                                                            | 0 | 0 | 0 | 0 | 0 | 0 | 0 | 0 | 0 | 0 | 0 | 0 | 0 | 0 | 0  | 0 | 0 | 0  | 0 | 0 | 0 | 0 | 0 | 0 | 0 | 0 | 0 |
|                                                                                                                                                                                                                                                                                                                                                                                                                                                                                                                                                                                                                                                                                                                                                                                                                                                            | 0 | 0 | 0 | 0 | 0 | 0 | 0 | 0 | 0 | 0 | 0 | 0 | 0 | 0 | 0  | 0 | 0 | 0  | 0 | 0 | 0 | 0 | 0 | 0 | 0 | 0 | 0 |
|                                                                                                                                                                                                                                                                                                                                                                                                                                                                                                                                                                                                                                                                                                                                                                                                                                                            | 0 | 0 | 0 | 0 | 0 | 0 | 0 | 0 | 0 | 0 | 0 | 0 | 0 | 0 | 8  | 0 | 6 | 23 | 8 | 0 | 0 | 0 | 0 | 0 | 0 | 0 | 0 |
| M02255_76_000000000-ADUNE_1_2112_19346_21029 G---AC---GT-AG-GAT-----GCA-A-G-----C--G--T---T--GT-C-CGG-AT-----TT-A--T-T--GG-GC-----GT--A-----AA-G--G-----G-T-----T-C-----G---T---T-----AA-<br>---G-T-C-T-----G-A-T--G--TT--A-AA-GA--C-T-GG-G-G-----CT-C-AA-----C-C-C-T-G-G-G--A-G---T-G--C-A---T--T-----G--GA-T-A---C-----T--G-G--CG--G-A-C---T-G-G-A-G-T--G---C-AG-----TA-G-A-----G-G-C-A---AG-C-----GG--A--ATT---C-C-A-G-<br>GT--GT-A-G-CG-GT--G---A--A-A---TG-C-GT-AG--AT-A-TC--T-G--G-A-A-G-A-AC-A-CC---GG--T--G--GC-GCA-A--G-C-G-----G--C-T-T-G---CTG--G--GC-T-G-----T-A---A-C-T--GA--CG-C-T-G--A-GG--A-A-CG-A--AA-G-C---T-AG--GG-T--AG-C-<br>G-AA-----TG--GG Bacteria(100);unclassified(100);unclassified(100);unclassified(100);unclassified(100);unclassified(100);unclassified(100);unclassified(100);unclassified(100);                           |   |   |   |   |   |   |   |   |   |   |   |   |   |   |    |   |   |    |   |   |   |   |   |   |   |   |   |
| Otu1349                                                                                                                                                                                                                                                                                                                                                                                                                                                                                                                                                                                                                                                                                                                                                                                                                                                    | 0 | 0 | 0 | 0 | 0 | 0 | 0 | 0 | 0 | 0 | 0 | 0 | 0 | 0 | 0  | 0 | 0 | 0  | 0 | 0 | 0 | 0 | 0 | 0 | 0 | 0 | 0 |
|                                                                                                                                                                                                                                                                                                                                                                                                                                                                                                                                                                                                                                                                                                                                                                                                                                                            | 0 | 0 | 0 | 0 | 0 | 0 | 0 | 0 | 0 | 0 | 0 | 0 | 0 | 0 | 0  | 0 | 0 | 0  | 0 | 0 | 0 | 0 | 0 | 0 | 0 | 0 | 0 |
|                                                                                                                                                                                                                                                                                                                                                                                                                                                                                                                                                                                                                                                                                                                                                                                                                                                            | 0 | 0 | 0 | 0 | 0 | 0 | 0 | 0 | 0 | 0 | 0 | 0 | 0 | 0 | 0  | 0 | 0 | 0  | 0 | 0 | 0 | 0 | 0 | 0 | 0 | 0 | 0 |
|                                                                                                                                                                                                                                                                                                                                                                                                                                                                                                                                                                                                                                                                                                                                                                                                                                                            | 0 | 0 | 0 | 0 | 0 | 0 | 0 | 0 | 0 | 0 | 0 | 0 | 0 | 0 | 20 | 0 | 0 | 0  | 0 | 0 | 0 | 0 | 0 | 0 | 0 | 0 | 0 |
| M02255_76_000000000-ADUNE_1_1101_15042_22107 .....AC---T-AC-GT-----GCC-A-G-----C--A--G---C--CG-C-GGT-AA-----TA-C--G-T--AG-GT-----GG--C---AA---GC-G-----T-TA-T-C-C-G-----G--A-AT-G-A-T-----<br>AA---G-T-C-T-----G-A-T--G--TG--A-AA-TC--C-C-CC-G-G-----CT-C-AA-----C-C-G-G-G-G-A--G-----G-GT-C-A---T--T-----G--GA-A-A---C-----T--G-T--CA--T-G-C---T-T-G-A-G-T--G---C-AG-----AA-G-A-----G-G-A-G---AG-T-----GG--A--ATT---C-C-A-<br>T-GT--GT-A-G-CG-GT--G---A--A-A---TG-C-GC-AG--AG-A-TA--T-G--G-A-G-G-A-AC-A-CC---AG--T--G--GC-GAA-G--G-C-G-----G--C-T-C-T---CTG--G--TC-T-G-----T-A---A-C-T--GA--CG-C-T-G--A-TG--T-G-CG-A--AA-G-C---G-TG--GG-G--AT-<br>C-A-AA-----CA--GG Bacteria(100);Firmicutes(100);Bacilli(100);Bacillales(100);Staphylococcaceae(100);unclassified(100);unclassified(100);unclassified(100);unclassified(100);                            |   |   |   |   |   |   |   |   |   |   |   |   |   |   |    |   |   |    |   |   |   |   |   |   |   |   |   |



|         |                                              |   |   |   |   |   |   |   |                                                                                                                                                                                                                                                                                                                                                                                                                                                                                                                                                                                                        |   |   |   |   |   |    |   |   |   |   |   |   |   |   |   |                                                                                                                                                                                 |   |  |  |  |  |  |  |  |  |  |  |  |  |  |  |
|---------|----------------------------------------------|---|---|---|---|---|---|---|--------------------------------------------------------------------------------------------------------------------------------------------------------------------------------------------------------------------------------------------------------------------------------------------------------------------------------------------------------------------------------------------------------------------------------------------------------------------------------------------------------------------------------------------------------------------------------------------------------|---|---|---|---|---|----|---|---|---|---|---|---|---|---|---|---------------------------------------------------------------------------------------------------------------------------------------------------------------------------------|---|--|--|--|--|--|--|--|--|--|--|--|--|--|--|
| Otu1350 | 0                                            | 0 | 0 | 0 | 0 | 0 | 0 | 0 | 0                                                                                                                                                                                                                                                                                                                                                                                                                                                                                                                                                                                                      | 0 | 0 | 0 | 0 | 0 | 0  | 0 | 0 | 0 | 0 | 0 | 0 | 0 | 0 | 0 | 0                                                                                                                                                                               | 0 |  |  |  |  |  |  |  |  |  |  |  |  |  |  |
|         | 0                                            | 0 | 0 | 0 | 0 | 0 | 0 | 0 | 0                                                                                                                                                                                                                                                                                                                                                                                                                                                                                                                                                                                                      | 0 | 0 | 0 | 0 | 0 | 0  | 0 | 0 | 0 | 0 | 0 | 0 | 0 | 0 | 0 | 0                                                                                                                                                                               | 0 |  |  |  |  |  |  |  |  |  |  |  |  |  |  |
|         | 0                                            | 0 | 0 | 0 | 0 | 0 | 0 | 0 | 0                                                                                                                                                                                                                                                                                                                                                                                                                                                                                                                                                                                                      | 0 | 0 | 0 | 0 | 0 | 0  | 0 | 0 | 0 | 0 | 0 | 0 | 0 | 0 | 0 | 0                                                                                                                                                                               | 0 |  |  |  |  |  |  |  |  |  |  |  |  |  |  |
|         | 0                                            | 0 | 0 | 0 | 0 | 0 | 0 | 0 | 0                                                                                                                                                                                                                                                                                                                                                                                                                                                                                                                                                                                                      | 0 | 0 | 0 | 0 | 0 | 11 | 0 | 0 | 0 | 0 | 0 | 0 | 0 | 0 | 0 | 0                                                                                                                                                                               | 0 |  |  |  |  |  |  |  |  |  |  |  |  |  |  |
|         | M02255_77_000000000-ADUT3_1_2118_14114_21404 |   |   |   |   |   |   |   | C---GT---GC-CA-GCA-----GCC-G-C----G--G--T--A-AT-A-CGG-AG-----GG-T-G-C-GA-GC-----GT--T----GT-CC-GG-AT-----T-TA-G-G-T-G-----G--G-TT-G-A-T-----AA---G-T-C-A-----G-T-G--G--TG--A-AA-TA--C-A-GC-C-G----CT-C-AA-----C-G-G-T-T-G-A--G-G---T-G--C-C--A--T-----T--GA-T-A--C-----T-G-T--CA--A-G-C---T-T-G-A-A-A--G--A-AT----TG-G-A-----G-G-C-T--GC-C-----GG--A--ATG---G-A-T-G-GT--GT-A-G-CG-GT--G---A--A-A---TG-C-AT-AG--AT-A-TC--A-T--C-C-A-G-A-AC-A-CC--GA--T--T--GC-GAA-G--G-C-A-----G--G-T-G-G---CTA--C-GA-T-T-----G-A---T-T-T-GA--CA-C-T-G--A-GG--C-A-CG-A--AA-G-C---A-TG--GG-G--AG-C-A-AA-----CA--GG       |   |   |   |   |   |    |   |   |   |   |   |   |   |   |   | Bacteria(100);Bacteroidetes(100);Sphingobacteria(100);Sphingobacteriales(100);Cytophagaceae(100);Dyadobacter(100);unclassified(100);unclassified(100);unclassified(100);        |   |  |  |  |  |  |  |  |  |  |  |  |  |  |  |
| Otu1351 | 0                                            | 0 | 0 | 0 | 0 | 0 | 0 | 0 | 0                                                                                                                                                                                                                                                                                                                                                                                                                                                                                                                                                                                                      | 0 | 0 | 0 | 0 | 0 | 0  | 0 | 0 | 0 | 0 | 0 | 0 | 0 | 0 | 0 | 0                                                                                                                                                                               | 0 |  |  |  |  |  |  |  |  |  |  |  |  |  |  |
|         | 0                                            | 0 | 0 | 0 | 0 | 0 | 0 | 0 | 0                                                                                                                                                                                                                                                                                                                                                                                                                                                                                                                                                                                                      | 0 | 0 | 0 | 0 | 0 | 0  | 0 | 0 | 0 | 0 | 0 | 0 | 0 | 0 | 0 | 0                                                                                                                                                                               | 0 |  |  |  |  |  |  |  |  |  |  |  |  |  |  |
|         | 0                                            | 0 | 0 | 0 | 0 | 0 | 0 | 0 | 0                                                                                                                                                                                                                                                                                                                                                                                                                                                                                                                                                                                                      | 0 | 0 | 0 | 0 | 0 | 0  | 0 | 0 | 0 | 0 | 0 | 0 | 0 | 0 | 0 | 0                                                                                                                                                                               | 0 |  |  |  |  |  |  |  |  |  |  |  |  |  |  |
|         | 0                                            | 0 | 0 | 0 | 0 | 0 | 0 | 0 | 0                                                                                                                                                                                                                                                                                                                                                                                                                                                                                                                                                                                                      | 0 | 0 | 0 | 0 | 0 | 11 | 0 | 0 | 0 | 0 | 0 | 0 | 0 | 0 | 0 | 0                                                                                                                                                                               | 0 |  |  |  |  |  |  |  |  |  |  |  |  |  |  |
|         | M02255_77_000000000-ADUT3_1_2112_24531_16378 |   |   |   |   |   |   |   | T---AC---GA-AG-GGG-----GCT-A-G-----C--G--T---T--GC-T-CGG-AA-----TT-A--C-T--GG-GC-----GT--A---AA-GG-GC-GC-----G-TA-G-G-C-G-----G--C-CT-G-C-T-----TA---G-T-C-A-----G-A-C--G--TG--A-AA-TT--C-C-CG-G-G----CT-T-AA-----C-C-T-G-G-G-G--G-C---T-G--C-G--T--T-----T--GA-G-A--C-----G--G-G--CG--G-G-C---T-T-G-A-G-G--A--T-GG---AA-G-A-----G-G-C-T--CG-T-----GG--A--ATT---C-C-C-A-GT--GT-A-G-AG-GT--G---A--A-A---TT-C-GT-AG--AT-A-TT--G-G--G-A-A-G-A-AC-A-CC--GG--T--G--GC-GAA-G--G-C-G-----G--C-G-A-G---CTG--G--TC-C-A-----T-T---A-C-T--GA--CG-C-T-G--A-GG--C-G-CG-A--CA-G-C---G-TG--GG-G--AG-C-A-AA-----CA--GG |   |   |   |   |   |    |   |   |   |   |   |   |   |   |   | Bacteria(100);Proteobacteria(100);Alphaproteobacteria(100);Rhodospirillales(100);Acetobacteraceae(100);unclassified(100);unclassified(100);unclassified(100);unclassified(100); |   |  |  |  |  |  |  |  |  |  |  |  |  |  |  |
| Otu1352 | 0                                            | 0 | 0 | 0 | 0 | 0 | 0 | 0 | 0                                                                                                                                                                                                                                                                                                                                                                                                                                                                                                                                                                                                      | 0 | 0 | 0 | 0 | 0 | 0  | 0 | 0 | 0 | 0 | 0 | 0 | 0 | 0 | 0 | 0                                                                                                                                                                               | 0 |  |  |  |  |  |  |  |  |  |  |  |  |  |  |
|         | 0                                            | 0 | 0 | 0 | 0 | 0 | 0 | 0 | 0                                                                                                                                                                                                                                                                                                                                                                                                                                                                                                                                                                                                      | 0 | 0 | 0 | 0 | 0 | 0  | 0 | 0 | 0 | 0 | 0 | 0 | 0 | 0 | 0 | 0                                                                                                                                                                               | 0 |  |  |  |  |  |  |  |  |  |  |  |  |  |  |
|         | 0                                            | 0 | 0 | 0 | 0 | 0 | 0 | 0 | 0                                                                                                                                                                                                                                                                                                                                                                                                                                                                                                                                                                                                      | 0 | 0 | 0 | 0 | 0 | 0  | 0 | 0 | 0 | 0 | 0 | 0 | 0 | 0 | 0 | 0                                                                                                                                                                               | 0 |  |  |  |  |  |  |  |  |  |  |  |  |  |  |
|         | 0                                            | 0 | 0 | 0 | 0 | 0 | 0 | 0 | 0                                                                                                                                                                                                                                                                                                                                                                                                                                                                                                                                                                                                      | 0 | 0 | 0 | 0 | 0 | 26 | 0 | 0 | 0 | 0 | 0 | 0 | 0 | 0 | 0 | 0                                                                                                                                                                               | 0 |  |  |  |  |  |  |  |  |  |  |  |  |  |  |
|         | M02255_77_000000000-ADUT3_1_2107_24298_17196 |   |   |   |   |   |   |   | T---AC---GT-AG-GGG-----GCG-A-G-----C--G--T---T--GT-C-CGG-AA-----TT-A--T-T--GG-GC-----GT--A---AA-GG-GC-GC-----G-TA-G-A-C-G-----G--C-CG-A-G-T-----AA---G-T-T-A-----C-T-G--G--TG--A-AA-GC--C-C-AT-C-T---TT-T-AA-----G-G-A-T-G-G-A--A-C---T-G--C-C--T--G-----T--AA-T-A--C-----T--G-C--TT--G-G-C---T-T-G-A-G-T--G--C-AG---GA-G-A-----G-G-G-A--AG-C-----GG--A--ATT---C-C-T-A-GT--GT-A-G-CG-GT--G---A--A-A---TG-C-GT-AG--AT-A-TT--A-G--G-A-G-G-A-AC-A-CC--AG--T--G--GC-GAA-G--G-C-G-----G--C-T-T-T--CTG--G--AC-T-G-----T-A---A-C-T--GA--CG-C-T-G--A-GG--C-G-CG-A--AA-G-C---G-TG--GG-G--AG-C-A-AA-----CA--GG   |   |   |   |   |   |    |   |   |   |   |   |   |   |   |   | Bacteria(100);unclassified(100);unclassified(100);unclassified(100);unclassified(100);unclassified(100);unclassified(100);unclassified(100);unclassified(100);                  |   |  |  |  |  |  |  |  |  |  |  |  |  |  |  |
| Otu1353 | 0                                            | 0 | 0 | 0 | 0 | 0 | 0 | 0 | 0                                                                                                                                                                                                                                                                                                                                                                                                                                                                                                                                                                                                      | 0 | 0 | 0 | 0 | 0 | 0  | 0 | 0 | 0 | 0 | 0 | 0 | 0 | 0 | 0 | 0                                                                                                                                                                               | 0 |  |  |  |  |  |  |  |  |  |  |  |  |  |  |
|         | 0                                            | 0 | 0 | 0 | 0 | 0 | 0 | 0 | 0                                                                                                                                                                                                                                                                                                                                                                                                                                                                                                                                                                                                      | 0 | 0 | 0 | 0 | 0 | 0  | 0 | 0 | 0 | 0 | 0 | 0 | 0 | 0 | 0 | 0                                                                                                                                                                               | 0 |  |  |  |  |  |  |  |  |  |  |  |  |  |  |
|         | 0                                            | 0 | 0 | 0 | 0 | 0 | 0 | 0 | 0                                                                                                                                                                                                                                                                                                                                                                                                                                                                                                                                                                                                      | 0 | 0 | 0 | 0 | 0 | 0  | 0 | 0 | 0 | 0 | 0 | 0 | 0 | 0 | 0 | 0                                                                                                                                                                               | 0 |  |  |  |  |  |  |  |  |  |  |  |  |  |  |
|         | 0                                            | 0 | 0 | 0 | 0 | 0 | 0 | 0 | 0                                                                                                                                                                                                                                                                                                                                                                                                                                                                                                                                                                                                      | 0 | 0 | 0 | 0 | 0 | 14 | 0 | 0 | 0 | 0 | 0 | 0 | 0 | 0 | 0 | 0                                                                                                                                                                               | 0 |  |  |  |  |  |  |  |  |  |  |  |  |  |  |
|         | M02255_77_000000000-ADUT3_1_2106_6146_14735  |   |   |   |   |   |   |   | T---AC---GA-AG-GGG-----GCT-A-G-----C--G--T---T--GC-T-CGG-AA-----TT-A--C-T--GG-GC-----GT--A---AA-GG-GC-GC-----G-TA-G-G-C-G-----                                                                                                                                                                                                                                                                                                                                                                                                                                                                         |   |   |   |   |   |    |   |   |   |   |   |   |   |   |   |                                                                                                                                                                                 |   |  |  |  |  |  |  |  |  |  |  |  |  |  |  |



|                                                                                                                                                                                                                           |   |   |   |   |   |   |   |   |   |   |   |   |   |   |    |                                                                                                                                                    |   |   |   |   |   |   |   |   |   |   |   |  |  |  |
|---------------------------------------------------------------------------------------------------------------------------------------------------------------------------------------------------------------------------|---|---|---|---|---|---|---|---|---|---|---|---|---|---|----|----------------------------------------------------------------------------------------------------------------------------------------------------|---|---|---|---|---|---|---|---|---|---|---|--|--|--|
| Otu1355                                                                                                                                                                                                                   | 0 | 0 | 0 | 0 | 0 | 0 | 0 | 0 | 0 | 0 | 0 | 0 | 0 | 0 | 0  | 0                                                                                                                                                  | 0 | 0 | 0 | 0 | 0 | 0 | 0 | 0 | 0 | 0 | 0 |  |  |  |
|                                                                                                                                                                                                                           | 0 | 0 | 0 | 0 | 0 | 0 | 0 | 0 | 0 | 0 | 0 | 0 | 0 | 0 | 0  | 0                                                                                                                                                  | 0 | 0 | 0 | 0 | 0 | 0 | 0 | 0 | 0 | 0 | 0 |  |  |  |
|                                                                                                                                                                                                                           | 0 | 0 | 0 | 0 | 0 | 0 | 0 | 0 | 0 | 0 | 0 | 0 | 0 | 0 | 0  | 0                                                                                                                                                  | 0 | 0 | 0 | 0 | 0 | 0 | 0 | 0 | 0 | 0 | 0 |  |  |  |
|                                                                                                                                                                                                                           | 0 | 0 | 0 | 0 | 0 | 0 | 0 | 0 | 0 | 0 | 0 | 0 | 0 | 0 | 29 | 0                                                                                                                                                  | 0 | 0 | 0 | 0 | 0 | 0 | 0 | 0 | 0 | 0 | 0 |  |  |  |
| M02255_77_000000000-ADUT3_1_1113_21868_14502                                                                                                                                                                              |   |   |   |   |   |   |   |   |   |   |   |   |   |   |    | T---AC---AG-AG-GTT-----ACA-A-G-----C--A--T---T--GT-C-CGG-AA-----TC-A--C-T--GG-GC-----GT--A-----AA-GC-GTTTC-----G-CA-G-G-T-G-----T--T-TT-T-C-T----- |   |   |   |   |   |   |   |   |   |   |   |  |  |  |
| ---AA---G-T-T-A-----T-G-T--T--TG--A-AA-GA--C-C-GG-G-G-----CT-C-AA-----C-C-T-C-G-G-G--A-A---C-G--G-G---C-G-----T-AA-T-A---C-----T--G-G--AA--A-A-A---T-T-G-A-A-G-G---G-TA-----TC-G-G-----G-G-C-T---AT-T-----GG--A--ACT---G- |   |   |   |   |   |   |   |   |   |   |   |   |   |   |    |                                                                                                                                                    |   |   |   |   |   |   |   |   |   |   |   |  |  |  |
| T-C-G-GT--GT-A-G-GG-GT--G---A--A-A---TC-C-GT-TG--AT-A-TC--G-A--C-A-G-G-A-AC-T-CC---GA--G--G--GC-GTA-G--G-C-A-----G--A-T-A-G---CTA--G--GT-A-C-----C-T---C-T-T--GA--CA-C-T-C--A-TG--A-A-CG-A--AA-G-C---T-AG--GG-G--         |   |   |   |   |   |   |   |   |   |   |   |   |   |   |    |                                                                                                                                                    |   |   |   |   |   |   |   |   |   |   |   |  |  |  |
| AG-C-G-AA-----AG--GG Bacteria(100);unclassified(100);unclassified(100);unclassified(100);unclassified(100);unclassified(100);unclassified(100);unclassified(100);unclassified(100);                                       |   |   |   |   |   |   |   |   |   |   |   |   |   |   |    |                                                                                                                                                    |   |   |   |   |   |   |   |   |   |   |   |  |  |  |
| Otu1356                                                                                                                                                                                                                   | 0 | 0 | 0 | 0 | 0 | 0 | 0 | 0 | 0 | 0 | 0 | 0 | 0 | 0 | 0  | 0                                                                                                                                                  | 0 | 0 | 0 | 0 | 0 | 0 | 0 | 0 | 0 | 0 | 0 |  |  |  |
|                                                                                                                                                                                                                           | 0 | 0 | 0 | 0 | 0 | 0 | 0 | 0 | 0 | 0 | 0 | 0 | 0 | 0 | 0  | 0                                                                                                                                                  | 0 | 0 | 0 | 0 | 0 | 0 | 0 | 0 | 0 | 0 | 0 |  |  |  |
|                                                                                                                                                                                                                           | 0 | 0 | 0 | 0 | 0 | 0 | 0 | 0 | 0 | 0 | 0 | 0 | 0 | 0 | 0  | 0                                                                                                                                                  | 0 | 0 | 0 | 0 | 0 | 0 | 0 | 0 | 0 | 0 | 0 |  |  |  |
|                                                                                                                                                                                                                           | 0 | 0 | 0 | 0 | 0 | 0 | 0 | 0 | 0 | 0 | 0 | 0 | 0 | 0 | 16 | 0                                                                                                                                                  | 0 | 0 | 0 | 0 | 0 | 0 | 0 | 0 | 0 | 0 | 0 |  |  |  |
| M02255_77_000000000-ADUT3_1_1110_19076_21094                                                                                                                                                                              |   |   |   |   |   |   |   |   |   |   |   |   |   |   |    | T---AC---GG-AG-GGG-----GCT-A-G-----C--G--T---T--GT-T-CGG-AA-----TC-A--C-T--GG-GC-----GT--A-----AA-GC-GC-GC-----G-TA-G-G-C-G-----G--C-TT-G-C-C----  |   |   |   |   |   |   |   |   |   |   |   |  |  |  |
| -----AA---G-T-C-A-----G-G-G--G--TG--A-AA-GC--C-C-GC-G-G-----CT-C-AA-----C-C-G-C-G-G-A--A-C---T-G--C-C---C-T-----T-GA-G-A---C-----T--G-G--CT--C-G-C---T-C-G-A-A-C--A---C-GG---GA-G-A-----G-G-C-G---GG-T-----GG--A--ATT---  |   |   |   |   |   |   |   |   |   |   |   |   |   |   |    |                                                                                                                                                    |   |   |   |   |   |   |   |   |   |   |   |  |  |  |
| C-C-G-A-GT--GT-A-G-AG-GT--G---A--A-A---TT-C-GT-AG--AT-A-TT--C-G--G-A-A-G-A-AC-A-CC---GG--T--G--GC-GAA-G--G-C-G-----G--C-C-C-G---CTG--G--AC-C-G-----T-T---G-T-T--GA--CG-C-T-G--A-GG--C-G-CG-A--AA-G-C---G-TG--             |   |   |   |   |   |   |   |   |   |   |   |   |   |   |    |                                                                                                                                                    |   |   |   |   |   |   |   |   |   |   |   |  |  |  |
| GG-G--AG-C-A-AA-----CA--GG Bacteria(100);unclassified(100);unclassified(100);unclassified(100);unclassified(100);unclassified(100);unclassified(100);unclassified(100);unclassified(100);                                 |   |   |   |   |   |   |   |   |   |   |   |   |   |   |    |                                                                                                                                                    |   |   |   |   |   |   |   |   |   |   |   |  |  |  |
| Otu1357                                                                                                                                                                                                                   | 0 | 0 | 0 | 0 | 0 | 0 | 0 | 0 | 0 | 0 | 0 | 0 | 0 | 0 | 0  | 0                                                                                                                                                  | 0 | 0 | 0 | 0 | 0 | 0 | 0 | 0 | 0 | 0 | 0 |  |  |  |
|                                                                                                                                                                                                                           | 0 | 0 | 0 | 0 | 0 | 0 | 0 | 0 | 0 | 0 | 0 | 0 | 0 | 0 | 0  | 0                                                                                                                                                  | 0 | 0 | 0 | 0 | 0 | 0 | 0 | 0 | 0 | 0 | 0 |  |  |  |
|                                                                                                                                                                                                                           | 0 | 0 | 0 | 0 | 0 | 0 | 0 | 0 | 0 | 0 | 0 | 0 | 0 | 0 | 0  | 0                                                                                                                                                  | 0 | 0 | 0 | 0 | 0 | 0 | 0 | 0 | 0 | 0 | 0 |  |  |  |
|                                                                                                                                                                                                                           | 0 | 0 | 0 | 0 | 0 | 0 | 0 | 0 | 0 | 0 | 0 | 0 | 0 | 0 | 40 | 0                                                                                                                                                  | 0 | 0 | 0 | 0 | 0 | 0 | 0 | 0 | 0 | 0 | 0 |  |  |  |
| M02255_77_000000000-ADUT3_1_1109_12832_18343                                                                                                                                                                              |   |   |   |   |   |   |   |   |   |   |   |   |   |   |    | G---AC---GG-AG-GGT-----GCT-A-G-----C--G--T---T--GT-T-CGG-AA-----TC-A--C-T--GG-GC-----GT--A-----AA-GG-GC-GC-----G-TA-G-G-C-G-----G--C-CT-G-T-T----  |   |   |   |   |   |   |   |   |   |   |   |  |  |  |
| -----AA---G-T-C-G-----G-A-T--G--TG--A-AA-GC--C-C-GG-G-G-----CT-C-AA-----C-C-C-C-G-G-A--A-C---T-G--C-A---T-C-----C--GA-G-A---C-----T--G-G--CA--G-G-C---T-T-G-A-G-A--C---C-GG---GA-G-A-----G-G-A-G---GG-T-----GG--A--ATA--- |   |   |   |   |   |   |   |   |   |   |   |   |   |   |    |                                                                                                                                                    |   |   |   |   |   |   |   |   |   |   |   |  |  |  |
| -T-C-C-A-GT--GT-A-G-AG-GT--G---A--A-A---TT-C-GT-AG--AT-A-TT--G-G--A-T-G-G-A-AC-A-CC---GG--T--G--GC-GAA-A--G-C-G-----G--C-T-C-T---CTG--G--CC-C-G-----G-A---T-C-T--GA--CG-C-T-G--A-GG--C-G-CG-A--AA-G-C---G-T-G-            |   |   |   |   |   |   |   |   |   |   |   |   |   |   |    |                                                                                                                                                    |   |   |   |   |   |   |   |   |   |   |   |  |  |  |
| GG-G--AG-C-A-AA-----CA--GG Bacteria(100);Proteobacteria(100);Alphaproteobacteria(100);Rhodospirillales(100);unclassified(100);unclassified(100);unclassified(100);unclassified(100);unclassified(100);                    |   |   |   |   |   |   |   |   |   |   |   |   |   |   |    |                                                                                                                                                    |   |   |   |   |   |   |   |   |   |   |   |  |  |  |
| Otu1358                                                                                                                                                                                                                   | 0 | 0 | 0 | 0 | 0 | 0 | 0 | 0 | 0 | 0 | 0 | 0 | 0 | 0 | 0  | 0                                                                                                                                                  | 0 | 0 | 0 | 0 | 0 | 0 | 0 | 0 | 0 | 0 | 0 |  |  |  |
|                                                                                                                                                                                                                           | 0 | 0 | 0 | 0 | 0 | 0 | 0 | 0 | 0 | 0 | 0 | 0 | 0 | 0 | 0  | 0                                                                                                                                                  | 0 | 0 | 0 | 0 | 0 | 0 | 0 | 0 | 0 | 0 | 0 |  |  |  |
|                                                                                                                                                                                                                           | 0 | 0 | 0 | 0 | 0 | 0 | 0 | 0 | 0 | 0 | 0 | 0 | 0 | 0 | 0  | 0                                                                                                                                                  | 0 | 0 | 0 | 0 | 0 | 0 | 0 | 0 | 0 | 0 | 0 |  |  |  |
|                                                                                                                                                                                                                           | 0 | 0 | 0 | 0 | 0 | 0 | 0 | 0 | 0 | 0 | 0 | 0 | 0 | 0 | 15 | 0                                                                                                                                                  | 0 | 0 | 0 | 0 | 0 | 0 | 0 | 0 | 0 | 0 | 0 |  |  |  |
| M02255_77_000000000-ADUT3_1_1104_7008_21476                                                                                                                                                                               |   |   |   |   |   |   |   |   |   |   |   |   |   |   |    | T---AC---GT-AG-GGG-----GCG-A-G-----C--G--T---T--GT-C-CGG-AA-----TG-A--T-T--GG-GC-----GT--A-----AA-GG-GC-GC-----G-TA-G-G-C-G-----G--C-CA-T-T-T----- |   |   |   |   |   |   |   |   |   |   |   |  |  |  |
| AA---G-T-C-T-----G-G-A--G--TG--A-AA-GT--C-C-TG-T-T----TT-T-AA-----G-A-T-G-G-G-A--A-C---T-G--C-T---T-T-----G--GA-T-A---C-----T--G-G--AT--G-G-C---T-T-G-A-G-T--G---C-AG---GA-G-A-----G-G-T-T---AT-C-----GG--A--ATT---C-C-C- |   |   |   |   |   |   |   |   |   |   |   |   |   |   |    |                                                                                                                                                    |   |   |   |   |   |   |   |   |   |   |   |  |  |  |
| G-GT--GT-A-G-CG-GT--G---A--A-A---TG-C-GT-AG--AG-A-TC--G-G--G-A-G-G-A-AC-A-CC---AG--T--G--GC-GAA-G--G-C-G-----G--G-T-A-A---CTG--G--AC-T-G-----C-A---A-C-T--GA--CG-C-T-G--A-GG--C-G-CG-A--AA-G-T---G-TG--GG-G--             |   |   |   |   |   |   |   |   |   |   |   |   |   |   |    |                                                                                                                                                    |   |   |   |   |   |   |   |   |   |   |   |  |  |  |
| AG-C-A-AA-----CA--GG Bacteria(100);Firmicutes(100);unclassified(100);unclassified(100);unclassified(100);unclassified(100);unclassified(100);unclassified(100);unclassified(100);                                         |   |   |   |   |   |   |   |   |   |   |   |   |   |   |    |                                                                                                                                                    |   |   |   |   |   |   |   |   |   |   |   |  |  |  |
| Otu1359                                                                                                                                                                                                                   | 0 | 0 | 0 | 0 | 0 | 0 | 0 | 0 | 0 | 0 | 0 | 0 | 0 | 0 | 0  | 0                                                                                                                                                  | 0 | 0 | 0 | 0 | 0 | 0 | 0 | 0 | 0 | 0 | 0 |  |  |  |
|                                                                                                                                                                                                                           | 0 | 0 | 0 | 0 | 0 | 0 | 0 | 0 | 0 | 0 | 0 | 0 | 0 | 0 | 0  | 0                                                                                                                                                  | 0 | 0 | 0 | 0 | 0 | 0 | 0 | 0 | 0 | 0 | 0 |  |  |  |
|                                                                                                                                                                                                                           | 0 | 0 | 0 | 0 | 0 | 0 | 0 | 0 | 0 | 0 | 0 | 0 | 0 | 0 | 0  | 0                                                                                                                                                  | 0 | 0 | 0 | 0 | 0 | 0 | 0 | 0 | 0 | 0 | 0 |  |  |  |
|                                                                                                                                                                                                                           | 0 | 0 | 0 | 0 | 0 | 0 | 0 | 0 | 0 | 0 | 0 | 0 | 0 | 0 | 35 | 0                                                                                                                                                  | 0 | 0 | 0 | 0 | 0 | 0 | 0 | 0 | 0 | 0 | 0 |  |  |  |
| M02255_77_000000000-ADUT3_1_1101_7909_21025                                                                                                                                                                               |   |   |   |   |   |   |   |   |   |   |   |   |   |   |    | T---AC---GA-AG-GGG-----GCT-A-G-----C--G--T---T--GC-T-CGG-AT-----TT-A--C-T--GG-GC-----GT--A-----AA-GG-GA-GC-----G-TA-G-G-C-G-----G--G-AC-G-A-C----- |   |   |   |   |   |   |   |   |   |   |   |  |  |  |
| AA---G-T-T-G-----G-G-G--G--TG--A-AA-GC--C-C-GG-G-G-----CT-C-AA-----C-C-T-C-G-G-A--A-T---T-G--C-C---T-T-----C--AA-G-A---C-----T--G-T--CG--A-C-C---T-G-G-A-G-T--T---T-GG---GA-G-A-----G-G-T-G---AG-T-----GG--A--ACT---C-C-  |   |   |   |   |   |   |   |   |   |   |   |   |   |   |    |                                                                                                                                                    |   |   |   |   |   |   |   |   |   |   |   |  |  |  |
| G-A-GT--GT-A-G-AG-GT--G---A--A-A---TT-C-GT-AG--AT-A-TT--C-G--G-A-A-G-A-AC-A-CC---AG--T--G--GC-GAA-G--G-C-G-----A--C-T-C-A---CTG--G--CC-C-A-----A-T---A-C-T--GA--CG-C-T-G--A-GG--C-T-CG-A--AA-G-C---G-TG--GG-G--           |   |   |   |   |   |   |   |   |   |   |   |   |   |   |    |                                                                                                                                                    |   |   |   |   |   |   |   |   |   |   |   |  |  |  |
| AG-C-A-AA-----CA--GG Bacteria(100);Proteobacteria(100);Alphaproteobacteria(100);unclassified(100);unclassified(100);unclassified(100);unclassified(100);unclassified(100);unclassified(100);                              |   |   |   |   |   |   |   |   |   |   |   |   |   |   |    |                                                                                                                                                    |   |   |   |   |   |   |   |   |   |   |   |  |  |  |



|                                                                                                                                                                                                                      |   |   |   |   |   |   |   |   |   |   |   |   |   |   |    |   |    |     |    |   |   |   |   |    |   |   |  |  |
|----------------------------------------------------------------------------------------------------------------------------------------------------------------------------------------------------------------------|---|---|---|---|---|---|---|---|---|---|---|---|---|---|----|---|----|-----|----|---|---|---|---|----|---|---|--|--|
| Otu1360                                                                                                                                                                                                              | 0 | 0 | 0 | 0 | 0 | 0 | 0 | 0 | 0 | 0 | 0 | 0 | 0 | 0 | 0  | 0 | 0  | 0   | 0  | 0 | 0 | 0 | 0 | 0  | 0 | 0 |  |  |
|                                                                                                                                                                                                                      | 0 | 0 | 0 | 0 | 0 | 0 | 0 | 0 | 0 | 0 | 0 | 0 | 0 | 0 | 0  | 0 | 0  | 0   | 0  | 0 | 0 | 0 | 0 | 0  | 0 | 0 |  |  |
|                                                                                                                                                                                                                      | 0 | 0 | 0 | 0 | 0 | 0 | 0 | 0 | 0 | 0 | 0 | 0 | 0 | 0 | 0  | 0 | 0  | 0   | 0  | 0 | 0 | 0 | 0 | 0  | 0 | 0 |  |  |
|                                                                                                                                                                                                                      | 0 | 0 | 0 | 0 | 0 | 0 | 0 | 0 | 0 | 0 | 0 | 0 | 0 | 0 | 53 | 0 | 34 | 160 | 58 | 0 | 0 | 0 | 0 | 0  | 0 | 0 |  |  |
| M02255_77_000000000-ADUT3_1_1101_7903_17884 G---AC---GT-AG-GAT-----GCA-A-G-----C-G-T--T--GT-C-CGG-AT-----TT-A-T-T--GG-GC-----GT-A----AA-GA-GT-TC-----G-TA-G-G-C-G-----G--T-TC-G-T-T-----AA-                          |   |   |   |   |   |   |   |   |   |   |   |   |   |   |    |   |    |     |    |   |   |   |   |    |   |   |  |  |
| --G-T-C-T-----G-A-T--G--TT--A-AA-GA--C-T-GG-G-G-----CT-C-AA-----C-C-C-T-G-G-G--A-G---T-G--C-A--T-T-----G--GA-T-A--C-----T--G-G--CG--G-A-C---T-G-G-A-G-T-G--C-AG---TA-G-A-----G-G-C-A--AG-C-----GG--A--ATT---C-C-A-G- |   |   |   |   |   |   |   |   |   |   |   |   |   |   |    |   |    |     |    |   |   |   |   |    |   |   |  |  |
| GT--GT-A-G-CG-GT--G---A-A-A--TG-C-GT-AG--AT-A-TC--T-G--G-A-A-G-A-AC-A-CC--GG--T--G--GC-GCA-A-G-C-G-----G--C-T-T-G--CTG--G--GC-T-G-----T-A--A-C-T--GA--CG-C-T-G--A-GG--A-A-CG-A--AA-G-C---T-AG--GG-T--AG-C-           |   |   |   |   |   |   |   |   |   |   |   |   |   |   |    |   |    |     |    |   |   |   |   |    |   |   |  |  |
| G-AA-----TG--GG Bacteria(100);unclassified(100);unclassified(100);unclassified(100);unclassified(100);unclassified(100);unclassified(100);unclassified(100);unclassified(100);                                       |   |   |   |   |   |   |   |   |   |   |   |   |   |   |    |   |    |     |    |   |   |   |   |    |   |   |  |  |
| Otu1361                                                                                                                                                                                                              | 0 | 0 | 0 | 0 | 0 | 0 | 0 | 0 | 0 | 0 | 0 | 0 | 0 | 0 | 0  | 0 | 0  | 0   | 0  | 0 | 0 | 0 | 0 | 0  | 0 | 0 |  |  |
|                                                                                                                                                                                                                      | 0 | 0 | 0 | 0 | 0 | 0 | 0 | 0 | 0 | 0 | 0 | 0 | 0 | 0 | 0  | 0 | 0  | 0   | 0  | 0 | 0 | 0 | 0 | 8  | 0 | 0 |  |  |
|                                                                                                                                                                                                                      | 0 | 0 | 0 | 0 | 0 | 0 | 0 | 0 | 0 | 0 | 0 | 0 | 0 | 0 | 0  | 0 | 0  | 0   | 0  | 0 | 0 | 0 | 0 | 0  | 0 | 0 |  |  |
|                                                                                                                                                                                                                      | 0 | 0 | 0 | 0 | 0 | 0 | 0 | 0 | 0 | 0 | 0 | 0 | 0 | 0 | 0  | 0 | 0  | 0   | 0  | 0 | 0 | 0 | 0 | 0  | 0 | 0 |  |  |
| M02255_77_000000000-ADUT3_1_2107_22321_19415 T---AC---GT-AT-GGG-----GCG-A-G-----C-G--T--T--GT-C-CGG-AA-----TC-A--T-T--GG-GC-----GT--A----AA-GG-GT-TC-----G-TA-G-G-C-G-----G--T-TT-A-T-T-----                         |   |   |   |   |   |   |   |   |   |   |   |   |   |   |    |   |    |     |    |   |   |   |   |    |   |   |  |  |
| ----AA---G-T-C-G-----A-G-T--G--TG--A-AA-GG--T-T-GG-G-G-----CT-C-AA-----C-C-C-C-A-T-A--A---A-G--C-A--C--T-----C--GA-A-A--C-----T--G-A--TA--A-A-C---T-T-G-A-G-A-T--G-TG---GA-G-A-----G-G-A-A--AG-T---GG--A--ATT---C-   |   |   |   |   |   |   |   |   |   |   |   |   |   |   |    |   |    |     |    |   |   |   |   |    |   |   |  |  |
| C-T-A-GT--GT-A-G-CG-GT--G---A--C-A--TG-C-GT-AG--AT-A-TT--A-G--G-A-G-G-A-AT-A-CC--AG--T--A--GC-GAA-G--G-C-G-----A--C-T-T-T--CTG--G--AC-A-C-----A-A--A-C-T--GA--CG-C-T-A--A-GG--A-A-CG-A--AA-G-C---G-TG--GG-G-         |   |   |   |   |   |   |   |   |   |   |   |   |   |   |    |   |    |     |    |   |   |   |   |    |   |   |  |  |
| -AG-C-A-AA-----CA--GG Bacteria(100);Firmicutes(100);Clostridia(100);Clostridiales(100);unclassified(100);unclassified(100);unclassified(100);unclassified(100);unclassified(100);                                    |   |   |   |   |   |   |   |   |   |   |   |   |   |   |    |   |    |     |    |   |   |   |   |    |   |   |  |  |
| Otu1362                                                                                                                                                                                                              | 0 | 0 | 0 | 0 | 0 | 0 | 0 | 0 | 0 | 0 | 0 | 0 | 0 | 0 | 0  | 0 | 0  | 0   | 0  | 0 | 0 | 0 | 0 | 0  | 0 | 0 |  |  |
|                                                                                                                                                                                                                      | 0 | 0 | 0 | 0 | 0 | 0 | 0 | 0 | 0 | 0 | 0 | 0 | 0 | 0 | 0  | 0 | 0  | 0   | 0  | 0 | 0 | 0 | 0 | 0  | 0 | 0 |  |  |
|                                                                                                                                                                                                                      | 0 | 0 | 0 | 0 | 0 | 0 | 0 | 0 | 0 | 0 | 0 | 0 | 0 | 0 | 0  | 0 | 0  | 0   | 0  | 0 | 0 | 0 | 0 | 14 | 0 | 0 |  |  |
|                                                                                                                                                                                                                      | 0 | 0 | 0 | 1 | 0 | 0 | 0 | 0 | 0 | 0 | 0 | 0 | 0 | 0 | 0  | 0 | 0  | 0   | 0  | 0 | 0 | 0 | 0 | 0  | 0 | 0 |  |  |
| M02255_77_000000000-ADUT3_1_1105_5313_18244 T---AC---GT-AG-GGT-----GCA-A-G-----C-G-T--T--GT-C-CGG-AA-----TT-A-T-T--GG-GC-----GT-A----AA-GA-GC-TC-----G-TA-G-G-C-G-----G--T-CT-G-T-C-----GC-                          |   |   |   |   |   |   |   |   |   |   |   |   |   |   |    |   |    |     |    |   |   |   |   |    |   |   |  |  |
| ---G-T-C-T-----G-C-T--G--TG--A-AA-AC--T-T-CG-G-G-----CT-C-AA-----C-C-C-G-A-A-G--C-T---G-G--C-A--G--T-----G--GG-T-A--C-----G--G-G--CG--G-A-C---T-G-G-A-G-T-G--C-AG---TA-G-G-----G-G-A-G--AC-T---GG--A--ATT---C-C-T-G- |   |   |   |   |   |   |   |   |   |   |   |   |   |   |    |   |    |     |    |   |   |   |   |    |   |   |  |  |
| GT--GT-A-G-CG-GT--G---A--A-A--TG-C-GC-AG--AT-A-TC--A-G--G-A-G-G-A-AC-A-CC--GG--T--G--GC-GAA-G--G-C-G-----G--G-T-C-T--CTG--G--GC-T-G-----T-T--A-C-T--GA--CG-C-T-G--A-GG--A-G-CG-A--AA-G-C---G-TG--GG-G--AG-           |   |   |   |   |   |   |   |   |   |   |   |   |   |   |    |   |    |     |    |   |   |   |   |    |   |   |  |  |
| C-G-AA-----CA--GG Bacteria(100);Actinobacteria(100);Actinobacteria(100);Actinobacteridae(100);Actinomycetales(100);unclassified(100);unclassified(100);unclassified(100);unclassified(100);                          |   |   |   |   |   |   |   |   |   |   |   |   |   |   |    |   |    |     |    |   |   |   |   |    |   |   |  |  |
| Otu1363                                                                                                                                                                                                              | 0 | 0 | 0 | 0 | 0 | 0 | 0 | 0 | 0 | 0 | 0 | 0 | 0 | 0 | 0  | 0 | 0  | 0   | 0  | 0 | 0 | 0 | 0 | 0  | 0 | 0 |  |  |
|                                                                                                                                                                                                                      | 0 | 0 | 0 | 0 | 0 | 0 | 0 | 0 | 0 | 0 | 0 | 0 | 0 | 0 | 0  | 0 | 0  | 0   | 0  | 0 | 0 | 0 | 0 | 7  | 0 | 0 |  |  |
|                                                                                                                                                                                                                      | 0 | 0 | 0 | 0 | 0 | 0 | 0 | 0 | 0 | 0 | 0 | 0 | 0 | 0 | 0  | 0 | 0  | 0   | 0  | 0 | 0 | 0 | 0 | 0  | 0 | 0 |  |  |
|                                                                                                                                                                                                                      | 0 | 0 | 0 | 0 | 0 | 0 | 0 | 0 | 0 | 0 | 0 | 0 | 0 | 0 | 0  | 0 | 0  | 0   | 0  | 0 | 0 | 0 | 0 | 0  | 0 | 0 |  |  |
| M02255_77_000000000-ADUT3_1_1111_23055_9937 T---AC---GT-AG-GGG-----GCA-A-G-----C-G-T--T--AT-C-CGG-AT-----TT-A--C-T--GG-GT-----GT-A----AA-GG-GA-G                                                                     |   |   |   |   |   |   |   |   |   |   |   |   |   |   |    |   |    |     |    |   |   |   |   |    |   |   |  |  |



|                                                                                                                                                                                                                                                                                                                                                                                                                                                                                                                                                                                                                                                                                                                                                                                                                         |   |   |   |   |   |   |   |   |   |   |   |   |   |   |   |   |   |   |   |   |   |   |    |   |   |   |   |
|-------------------------------------------------------------------------------------------------------------------------------------------------------------------------------------------------------------------------------------------------------------------------------------------------------------------------------------------------------------------------------------------------------------------------------------------------------------------------------------------------------------------------------------------------------------------------------------------------------------------------------------------------------------------------------------------------------------------------------------------------------------------------------------------------------------------------|---|---|---|---|---|---|---|---|---|---|---|---|---|---|---|---|---|---|---|---|---|---|----|---|---|---|---|
| Otu1365                                                                                                                                                                                                                                                                                                                                                                                                                                                                                                                                                                                                                                                                                                                                                                                                                 | 0 | 0 | 0 | 0 | 0 | 0 | 0 | 0 | 0 | 0 | 0 | 0 | 0 | 0 | 0 | 0 | 0 | 0 | 0 | 0 | 0 | 0 | 0  | 0 | 0 | 0 | 0 |
|                                                                                                                                                                                                                                                                                                                                                                                                                                                                                                                                                                                                                                                                                                                                                                                                                         | 0 | 0 | 0 | 0 | 0 | 0 | 0 | 0 | 0 | 0 | 0 | 0 | 0 | 0 | 0 | 0 | 0 | 0 | 0 | 0 | 0 | 0 | 8  | 0 | 0 | 0 | 0 |
|                                                                                                                                                                                                                                                                                                                                                                                                                                                                                                                                                                                                                                                                                                                                                                                                                         | 0 | 0 | 0 | 0 | 0 | 0 | 0 | 0 | 0 | 0 | 0 | 0 | 0 | 0 | 0 | 0 | 0 | 0 | 0 | 0 | 0 | 0 | 0  | 0 | 0 | 0 | 0 |
|                                                                                                                                                                                                                                                                                                                                                                                                                                                                                                                                                                                                                                                                                                                                                                                                                         | 0 | 0 | 0 | 0 | 0 | 0 | 0 | 0 | 0 | 0 | 0 | 0 | 0 | 0 | 0 | 0 | 0 | 0 | 0 | 0 | 0 | 0 | 0  | 0 | 0 | 0 | 0 |
| M02255_77_000000000-ADUT3_1_1112_28223_11342 T---AC---GT-AG-GTG-----GCA-A-G-----C-G--T---T-GT-C-CGG-AT-----TT-A-C-T--GG-GT-----GT-A----AA-GG-GC-GT-----G-TA-G-G-C-G-----G--A-GA-T-G-C-----AA---G-T-C-A-----G-G-A-G--TG--A-AA-TC--T-A-GG-G-G----CT-C-AA-----C-C-C-C-T-A-A--A-C---T-G--C-T--T-T-----T-GA-A-A--C-----T-G-T-AT--C-C-C---T-T-G-A-G-T-A--T-CG----GA-G-A-----G-G-C-A--GG-C-----GG--A--ATT---C-C-T-A-GT--GT-A-G-CG-GT--G---A-A-A---TG-C-GT-AG--AT-A-TT--A-G--G-A-G-G-A-AC-A-CC---AG--T-G--GC-GAA-G--G-C-G-----G--C-C-T-G---CTG--G--AC-G-A-----C-A--A-C-T--GA--CG-C-T-G--A-GG--C-G-CG-A-AA-G-C---G-TG--GG-G--AG-C-A-AA-----CA--GG Bacteria(100);Firmicutes(100);Clostridia(100);Clostridiales(100);Ruminococcaceae(100);unclassified(100);unclassified(100);unclassified(100);unclassified(100);                 |   |   |   |   |   |   |   |   |   |   |   |   |   |   |   |   |   |   |   |   |   |   |    |   |   |   |   |
| Otu1366                                                                                                                                                                                                                                                                                                                                                                                                                                                                                                                                                                                                                                                                                                                                                                                                                 | 0 | 0 | 0 | 0 | 0 | 0 | 0 | 0 | 0 | 0 | 0 | 0 | 0 | 0 | 0 | 0 | 0 | 0 | 0 | 0 | 0 | 0 | 0  | 0 | 0 | 0 | 0 |
|                                                                                                                                                                                                                                                                                                                                                                                                                                                                                                                                                                                                                                                                                                                                                                                                                         | 0 | 0 | 0 | 0 | 0 | 0 | 0 | 0 | 0 | 0 | 0 | 0 | 0 | 0 | 0 | 0 | 0 | 0 | 0 | 0 | 0 | 0 | 11 | 0 | 0 | 0 | 0 |
|                                                                                                                                                                                                                                                                                                                                                                                                                                                                                                                                                                                                                                                                                                                                                                                                                         | 0 | 0 | 0 | 0 | 0 | 0 | 0 | 0 | 0 | 0 | 0 | 0 | 0 | 0 | 0 | 0 | 0 | 0 | 0 | 0 | 0 | 0 | 0  | 0 | 0 | 0 | 0 |
|                                                                                                                                                                                                                                                                                                                                                                                                                                                                                                                                                                                                                                                                                                                                                                                                                         | 0 | 0 | 0 | 0 | 0 | 0 | 0 | 0 | 0 | 0 | 0 | 0 | 0 | 0 | 0 | 0 | 0 | 0 | 0 | 0 | 0 | 0 | 0  | 0 | 0 | 0 | 0 |
| M02255_77_000000000-ADUT3_1_1114_19063_12573 T---AC---GG-AG-GGA-----GCT-A-G-----C-G--T---T-GT-T-CGG-AA-----TT-A-C-T--GG-GC-----GT--A----AA-GC-GT-AC-----G-TA-G-G-C-G-----G--T-GA-C-T-C-----AA---G-T-C-A-----G-A-G-G--TG--A-AA-GC--C-T-GG-A-G----CT-C-AA-----C-T-C-C-A-G-A--A-C---T-G--C-C---T-T-----T-GA-A-A--C-----T-A-G--GT--C-G-C---T-T-G-A-A-T-C---A-CG----GA-G-A-----G-G-T-G--AG-T-----GG--A--ATT---C-C-G-A-GT--GT-A-G-AG-GT--G---A-A-A---TT-C-GT-AG--AT-A-TT--C-G--G-A-A-G-A-AC-A-CC---AG--T-G--GC-GAA-G--G-C-G-----G--C-T-C-A---CTG--G--AC-G-T-----G-T--A-T-T-GA--CG-C-T-G--A-GG--T-A-CG-A-AA-G-C---G-TG--GG-G--AG-C-A-AA-----CA--GG Bacteria(100);Proteobacteria(100);Alphaproteobacteria(100);Sphingomonadales(100);unclassified(100);unclassified(100);unclassified(100);unclassified(100);unclassified(100); |   |   |   |   |   |   |   |   |   |   |   |   |   |   |   |   |   |   |   |   |   |   |    |   |   |   |   |
| Otu1367                                                                                                                                                                                                                                                                                                                                                                                                                                                                                                                                                                                                                                                                                                                                                                                                                 | 0 | 0 | 0 | 0 | 0 | 0 | 0 | 0 | 0 | 0 | 0 | 0 | 0 | 0 | 0 | 0 | 0 | 0 | 0 | 0 | 0 | 0 | 0  | 0 | 0 | 0 | 0 |
|                                                                                                                                                                                                                                                                                                                                                                                                                                                                                                                                                                                                                                                                                                                                                                                                                         | 0 | 0 | 0 | 0 | 0 | 0 | 0 | 0 | 0 | 0 | 0 | 0 | 0 | 0 | 0 | 0 | 0 | 0 | 0 | 0 | 0 | 0 | 7  | 0 | 0 | 0 | 0 |
|                                                                                                                                                                                                                                                                                                                                                                                                                                                                                                                                                                                                                                                                                                                                                                                                                         | 0 | 0 | 0 | 0 | 0 | 0 | 0 | 0 | 0 | 0 | 0 | 0 | 0 | 0 | 0 | 0 | 0 | 0 | 0 | 0 | 0 | 0 | 0  | 0 | 0 | 0 | 0 |
|                                                                                                                                                                                                                                                                                                                                                                                                                                                                                                                                                                                                                                                                                                                                                                                                                         | 0 | 0 | 0 | 0 | 0 | 0 | 0 | 0 | 0 | 0 | 0 | 0 | 0 | 0 | 0 | 0 | 0 | 0 | 0 | 0 | 0 | 0 | 0  | 0 | 0 | 0 | 0 |
| M02255_77_000000000-ADUT3_1_2105_20572_11539 G---AC---AG-AG-GGG-----GCA-A-G-----C-G--T---T-GT-C-CGG-AG-----TT-A-C-T--GG-GC-----GT-A----AA-GC-GT-CC-----G-CA-G-G-C-G-----G--T-CG-G-G-T-----AA---G-T-G-G-----T-G-T-G--TG--A-AA-GC--G-C-GC-A-G----CT-C-AA-----C-T-G-C-G-C-G--A-G---G-C--C-A---T-G-----C--CA-G-A--C-----T-G-C-TC--A-A-C---T-C-G-A-G-T-C---C-GG----TA-G-A-----G-G-T-T---CG-T-----CG--A--ATT---G-C-C-G-GT--GT-A-G-TG-GT--G---A-A-A---TG-C-GT-AG--AG-A-TC--G-G--C-A-G-G-A-AG-A-CC---AA-G-G--GT-GCA-G--A-C-A-----G--C-G-A-A---CTG--G--GA-C-G-----G-T---A-C-T--GA--CG-C-TGA---AG--G-A-CG-A-AA-G-C---G-TG--GG-G--AG-C-G-AA-----CC--GG Bacteria(100);unclassified(100);unclassified(100);unclassified(100);unclassified(100);unclassified(100);unclassified(100);unclassified(100);unclassified(100);              |   |   |   |   |   |   |   |   |   |   |   |   |   |   |   |   |   |   |   |   |   |   |    |   |   |   |   |
| Otu1368                                                                                                                                                                                                                                                                                                                                                                                                                                                                                                                                                                                                                                                                                                                                                                                                                 | 0 | 0 | 0 | 0 | 0 | 0 | 0 | 0 | 0 | 0 | 0 | 0 | 0 | 0 | 0 | 0 | 0 | 0 | 0 | 0 | 0 | 0 | 0  | 0 | 0 | 0 | 0 |
|                                                                                                                                                                                                                                                                                                                                                                                                                                                                                                                                                                                                                                                                                                                                                                                                                         | 0 | 0 | 0 | 0 | 0 | 0 | 0 | 0 | 0 | 0 | 0 | 0 | 0 | 0 | 0 | 0 | 0 | 0 | 0 | 0 | 0 | 0 | 9  | 0 | 0 | 0 | 0 |
|                                                                                                                                                                                                                                                                                                                                                                                                                                                                                                                                                                                                                                                                                                                                                                                                                         | 0 | 0 | 0 | 0 | 0 | 0 | 0 | 0 | 0 | 0 | 0 | 0 | 0 | 0 | 0 | 0 | 0 | 0 | 0 | 0 | 0 | 0 | 0  | 0 | 0 | 0 | 0 |
|                                                                                                                                                                                                                                                                                                                                                                                                                                                                                                                                                                                                                                                                                                                                                                                                                         | 0 | 0 | 0 | 0 | 0 | 0 | 0 | 0 | 0 | 0 | 0 | 0 | 0 | 0 | 0 | 0 | 0 | 0 | 0 | 0 | 0 | 0 | 0  | 0 | 0 | 0 | 0 |
| M02255_77_000000000-ADUT3_1_2107_27019_10397 T---AC---GA-GG-GGG-----GCA-A-G-----C-G--T---T-GT-T-CGG-AA-----TT-A-T-T--GG-GC-----GT-A----AA-GG-GT-GC-----G-TA-G-G-C-G-----G--T-TC-A-G-C-----AA---G-T-C-T-----C-G-T-G--TG--A                                                                                                                                                                                                                                                                                                                                                                                                                                                                                                                                                                                               |   |   |   |   |   |   |   |   |   |   |   |   |   |   |   |   |   |   |   |   |   |   |    |   |   |   |   |



|                                                                                                                                                                                                                                                                                                                                                                                                                                                                                                                                                                                                                                                                                                                                                                                                                       |   |   |   |   |   |   |   |   |   |   |   |   |   |   |   |   |   |   |   |   |   |   |   |    |    |   |   |
|-----------------------------------------------------------------------------------------------------------------------------------------------------------------------------------------------------------------------------------------------------------------------------------------------------------------------------------------------------------------------------------------------------------------------------------------------------------------------------------------------------------------------------------------------------------------------------------------------------------------------------------------------------------------------------------------------------------------------------------------------------------------------------------------------------------------------|---|---|---|---|---|---|---|---|---|---|---|---|---|---|---|---|---|---|---|---|---|---|---|----|----|---|---|
| Otu1370                                                                                                                                                                                                                                                                                                                                                                                                                                                                                                                                                                                                                                                                                                                                                                                                               | 0 | 0 | 0 | 0 | 0 | 0 | 0 | 0 | 0 | 0 | 0 | 0 | 0 | 0 | 0 | 0 | 0 | 0 | 0 | 0 | 0 | 0 | 0 | 0  | 0  | 0 | 0 |
|                                                                                                                                                                                                                                                                                                                                                                                                                                                                                                                                                                                                                                                                                                                                                                                                                       | 0 | 0 | 0 | 0 | 0 | 0 | 0 | 0 | 0 | 0 | 0 | 0 | 0 | 0 | 0 | 0 | 0 | 0 | 0 | 0 | 0 | 0 | 0 | 15 | 0  | 0 | 0 |
|                                                                                                                                                                                                                                                                                                                                                                                                                                                                                                                                                                                                                                                                                                                                                                                                                       | 0 | 0 | 0 | 0 | 0 | 0 | 0 | 0 | 0 | 0 | 0 | 0 | 0 | 0 | 0 | 0 | 0 | 0 | 0 | 0 | 0 | 0 | 0 | 0  | 0  | 0 | 0 |
|                                                                                                                                                                                                                                                                                                                                                                                                                                                                                                                                                                                                                                                                                                                                                                                                                       | 0 | 0 | 0 | 0 | 0 | 0 | 0 | 0 | 0 | 0 | 0 | 0 | 0 | 0 | 0 | 0 | 0 | 0 | 0 | 0 | 0 | 0 | 0 | 0  | 0  | 0 | 0 |
| M02255_77_000000000-ADUT3_1_2115_13643_11130 T---AC---GA-AG-GGG-----GCT-A-G-----C-G-T---T-GC-T-CGG-AA-----TT-A-C-T-GG-GC-----GT-A---AA-GG-GC-GC-----G-TA-G-G-C-G-----G-A-CG-T-T-T-----AA---G-T-C-A-----G-A-G--G-TA-A-AA-GC--C-C-AG-G-G---CT-C-AA-----C-C-T-T-G-G-A-A-C---T-G-C-C---T-T-----T-GA-T-A--C-----T-G-G-AC-G-T-C---T-T-G-A-G-T-A--C-GG---GA-G-A-----G-G-T-G---TG-T-----GG-A--ACT---C-C-G-A-GT--GT-A-G-AG-GT--G---A-A-A---TT-C-GT-AG--AT-A-TT--C-G--G-A-A-G-A-AC-A-CC---AG--T-G--GC-GAA-G-G-C-G-----A-C-A-C-A---CTG--G--CC-C-G-----T-T---A-C-T-GA--CG-C-T-G--A-GG--C-G-CG-A-AA-G-C---G-TG--GG-G--AG-C-A-AA-----CA--GG Bacteria(100);Proteobacteria(100);Alphaproteobacteria(100);Caulobacterales(100);Caulobacteraceae(100);unclassified(100);unclassified(100);unclassified(100);unclassified(100);          |   |   |   |   |   |   |   |   |   |   |   |   |   |   |   |   |   |   |   |   |   |   |   |    |    |   |   |
| Otu1371                                                                                                                                                                                                                                                                                                                                                                                                                                                                                                                                                                                                                                                                                                                                                                                                               | 0 | 0 | 0 | 0 | 0 | 0 | 0 | 0 | 0 | 0 | 0 | 0 | 0 | 0 | 0 | 0 | 0 | 0 | 0 | 0 | 0 | 0 | 0 | 0  | 0  | 0 | 0 |
|                                                                                                                                                                                                                                                                                                                                                                                                                                                                                                                                                                                                                                                                                                                                                                                                                       | 0 | 0 | 0 | 0 | 0 | 0 | 0 | 0 | 0 | 0 | 0 | 0 | 0 | 0 | 0 | 0 | 0 | 0 | 0 | 0 | 0 | 0 | 0 | 9  | 0  | 0 | 0 |
|                                                                                                                                                                                                                                                                                                                                                                                                                                                                                                                                                                                                                                                                                                                                                                                                                       | 0 | 0 | 0 | 0 | 0 | 0 | 0 | 0 | 0 | 0 | 0 | 0 | 0 | 0 | 0 | 0 | 0 | 0 | 0 | 0 | 0 | 0 | 0 | 0  | 0  | 0 | 0 |
|                                                                                                                                                                                                                                                                                                                                                                                                                                                                                                                                                                                                                                                                                                                                                                                                                       | 0 | 0 | 0 | 0 | 0 | 0 | 0 | 0 | 0 | 0 | 0 | 0 | 0 | 0 | 0 | 0 | 0 | 0 | 0 | 0 | 0 | 0 | 0 | 0  | 0  | 0 | 0 |
| M02255_77_000000000-ADUT3_1_1113_5384_15115 T---AC---GT-AG-GGT-----GCG-A-G-----C-G-T---T-GT-C-CGG-AT-----TT-A-T-T-GG-GC-----GT-A---AA-GA-GC-TT-----G-TA-G-G-C-G-----G-T-TT-G-T-T-----GC---G-T-C-G-----G-A-A--G-TG--A-AA-AC--T-C-AG-G-G---CT-T-AA-----C-T-C-T-G-A-G-C-C---T-G-C-T---T-T-----C-GA-T-A--C-----G-G-G-CA-G-A-C---T-T-G-A-G-G-A--A-GG---TA-G-G-----G-G-A-G---AA-T-----GG--A--ATT---C-C-T-G-GT--GA-A-G-CG-GT--G---G-A-A---TG-C-GT-AG--AT-A-TC-A-G--G-A-G-G-A-AC-A-CC---GG-T-G--GC-GAA-G-G-C-G-----G-T-T-C-T---CTG--G--AC-C-T-----T-T---C-C-T-GA--CG-C-T-G--A-GA--A-G-CG-A-AA-G-C---G-TG--GG-G--AG-C-A-AA-----CA--GG Bacteria(100);Actinobacteria(100);Actinobacteria(100);Actinobacteridae(100);Actinomycetales(100);Propionibacterineae(100);Propionibacteriaceae(100);unclassified(100);unclassified(100); |   |   |   |   |   |   |   |   |   |   |   |   |   |   |   |   |   |   |   |   |   |   |   |    |    |   |   |
| Otu1372                                                                                                                                                                                                                                                                                                                                                                                                                                                                                                                                                                                                                                                                                                                                                                                                               | 0 | 0 | 0 | 0 | 0 | 0 | 0 | 0 | 0 | 0 | 0 | 0 | 0 | 0 | 0 | 0 | 0 | 0 | 0 | 0 | 0 | 0 | 0 | 0  | 0  | 0 | 0 |
|                                                                                                                                                                                                                                                                                                                                                                                                                                                                                                                                                                                                                                                                                                                                                                                                                       | 0 | 0 | 0 | 0 | 0 | 0 | 0 | 0 | 0 | 0 | 0 | 0 | 0 | 0 | 0 | 0 | 0 | 0 | 0 | 0 | 0 | 0 | 0 | 0  | 11 | 0 | 0 |
|                                                                                                                                                                                                                                                                                                                                                                                                                                                                                                                                                                                                                                                                                                                                                                                                                       | 0 | 0 | 0 | 0 | 0 | 0 | 0 | 0 | 0 | 0 | 0 | 0 | 0 | 0 | 0 | 0 | 0 | 0 | 0 | 0 | 0 | 0 | 0 | 0  | 0  | 0 | 0 |
|                                                                                                                                                                                                                                                                                                                                                                                                                                                                                                                                                                                                                                                                                                                                                                                                                       | 0 | 0 | 0 | 0 | 0 | 0 | 0 | 0 | 0 | 0 | 0 | 0 | 0 | 0 | 0 | 0 | 0 | 0 | 0 | 0 | 0 | 0 | 0 | 0  | 0  | 0 | 0 |
| M02255_77_000000000-ADUT3_1_2101_26246_12116 G---AT---AG-AG-GAT-----GCA-A-G-----C-A--T---T-AT-C-TGG-AA-----TG-A--T-T-GG-GC-----GT-A---AA-GC-GT-CT-----G-TA-G-G-T-G-----G--C-TT-T-T-C-----AA---G-T-C-C-----G-C-T-G--TC--A-AA-TC--C-C-CG-G-G---CT-C-AA-----C-C-C-T-G-G-A-C-A---G-G--C-G--G-T-----G-GA-A-A--C-----T-A-A-CA--A-G-A---T-G-G-A-G-T-A--C-GG---TA-G-G-----G-G-C-A--GA-G-----GG--A--ATT---T-G-C-G-GT--GG-A-G-GG-GT--G---A-A-A---TG-C-GT-TG--AG-A-TC--G-G--A-A-A-T-A-AC-A-CC---AA--C-G--GC-GAA-A-G-C-A-----C-T-C-T-G---CTG--G--GC-C-G-----A-C---A-T-T-GA--CA-T-T-G--A-GA--G-A-CG-A-AA-G-C---T-AG--GG-G--AG-A-A-AA-----TG--GG Bacteria(100);Cyanobacteria(100);unclassified(100);unclassified(100);unclassified(100);unclassified(100);unclassified(100);unclassified(100);unclassified(100);                    |   |   |   |   |   |   |   |   |   |   |   |   |   |   |   |   |   |   |   |   |   |   |   |    |    |   |   |
| Otu1373                                                                                                                                                                                                                                                                                                                                                                                                                                                                                                                                                                                                                                                                                                                                                                                                               | 0 | 0 | 0 | 0 | 0 | 0 | 0 | 0 | 0 | 0 | 0 | 0 | 0 | 0 | 0 | 0 | 0 | 0 | 0 | 0 | 0 | 0 | 0 | 0  | 0  | 0 | 0 |
|                                                                                                                                                                                                                                                                                                                                                                                                                                                                                                                                                                                                                                                                                                                                                                                                                       | 0 | 0 | 0 | 0 | 0 | 0 | 0 | 0 | 0 | 0 | 0 | 0 | 0 | 0 | 0 | 0 | 0 | 0 | 0 | 0 | 0 | 0 | 0 | 0  | 6  | 0 | 0 |
|                                                                                                                                                                                                                                                                                                                                                                                                                                                                                                                                                                                                                                                                                                                                                                                                                       | 0 | 0 | 0 | 0 | 0 | 0 | 0 | 0 | 0 | 0 | 0 | 0 | 0 | 0 | 0 | 0 | 0 | 0 | 0 | 0 | 0 | 0 | 0 | 0  | 0  | 0 | 0 |
|                                                                                                                                                                                                                                                                                                                                                                                                                                                                                                                                                                                                                                                                                                                                                                                                                       | 0 | 0 | 0 | 0 | 0 | 0 | 0 | 0 | 0 | 0 | 0 | 0 | 0 | 0 | 0 | 0 | 0 | 0 | 0 | 0 | 0 | 0 | 0 | 0  | 0  | 0 | 0 |
| M02255_77_000000000-ADUT3_1_2113_7028_8880 T---AC---GT-AG-GAT-----CCG-A-G-----C-G-T---T-AT-C-CGG-AG-----TG-A--C-T-GG-GC-----GT-A---AA-GA-GTTGC-----G-TA-G-G-C-G-----G--A-CG-T-G-T-----AA---G-C-G-A-----A-T-A--G-TG--A-AA-TC                                                                                                                                                                                                                                                                                                                                                                                                                                                                                                                                                                                           |   |   |   |   |   |   |   |   |   |   |   |   |   |   |   |   |   |   |   |   |   |   |   |    |    |   |   |



Otu1375 0 0 0 0 0 0 0 0 0 0 0 0 0 0 0 0 0 0 0 0 0 0 0 0 0 0 0 0 0 0  
0 0 0 0 0 0 0 0 0 0 0 0 0 0 0 0 0 0 0 0 0 0 0 0 0 0 6 0 0  
0 0 0 0 0 0 0 0 0 0 0 0 0 0 0 0 0 0 0 0 0 0 0 0 0 0 0 0 0  
0 0 0 0 0 0 0 0 0 0 0 0 0 0 0 0 0 0 0 0 0 0 0 0 0 0 0  
M02255\_76\_000000000-ADUNE\_1\_1101\_7090\_23734 C---GG---CT-AA-CTC-----TGT---G-----C--C--A--G--CA-G-CCG-CG-----GT-A--A-T--AC-GA-----AG-G----GG-GC-TA-GC-----G-TT-GTT-C-G-----G--A-CT-A-T-T-----AA--  
--G-T-C-A-----G-G-G--G--TG--A-AA-TC--C-C-GG-G-G----CT-C-AA-----C-C-C-C-G-G-A--A-C---T-G-C-C---T-T-----T-GA-T-A--C-----T-G-G-TA--G-T-C---T-T-G-A-G-T-T---C-GA----GA-G-A-----G-G-T-G---AG-T-----GG--A--ATT---C-C-G-A-  
GT--GT-A-G-AG-GT--G---A--A-A---TT-C-GT-AG--AT-A-TT--C-G--G-A-G-G-A-AC-A-CC---AG--T--G--GC-GAA-G--G-C--G-----G--C-T-C-A---CTG--G--CT-C-G-----A-T---A-C-T--GA--CG-C-T-G--A-GG--T-G-CG-A--AA-G-C---G-TG--GG-G--AG-  
C-A-AA-----CA--GG Bacteria(100);Proteobacteria(100);Alphaproteobacteria(100);Rhizobiales(100);unclassified(100);unclassified(100);unclassified(100);unclassified(100);unclassified(100);

Otu1376 0 0 0 0 0 0 0 0 0 0 0 0 0 0 0 0 0 0 0 0 0 0 0 0 0 0 0 0 0 0  
0 0 0 0 0 0 0 0 0 0 0 0 0 0 0 0 0 0 0 0 0 0 0 0 0 0 13 0 0  
0 0 0 0 0 0 0 0 0 0 0 0 0 0 0 0 0 0 0 0 0 0 0 0 0 0 0 0 0  
0 0 0 0 0 0 0 0 0 0 0 0 0 0 0 0 0 0 0 0 0 0 0 0 0 0 0  
M02255\_76\_000000000-ADUNE\_1\_1108\_8709\_11797 C---TC---CG-TG-CCA-----GCA-G-C-----C--G--C--G--GT---AAT-AC-----GG-A--G-G--GT-GC-----AA-G----CG-TT-AT-CC-----G-GA--T-C-T-----G--A-TT-T-G-T-----AA---  
G-T-C-A-----G-T-G--G--TG--A-AA-TC--T-C-AC-A-G----CT-T-AA-----C-T-G-T-G-A-A--A-C---T-G-C-C---A-T-----T-GA-T-A--C-----T-G-C-AA--G-T-C---T-T-G-A-G-T-G---T-TG----TT-G-A-----A-G-T-A---GC-T-----GG--A--ATA---A-G-T-A-GT--  
GT-A-G-CG-GT--G---A--A-A---TG-C-AT-AG--AT-A-TT--A-C--T-T-A-G-A-AC-A-CC---AA-T--T--GC-GAA-G--G-C--A-----G--G-T-T-A---CTA--A--GC-A-A-----C-A--A-C-T--GA--CG-C-T-G--A-TG--G-A-CG-A--AA-G-C---G-TG--GG-G--AG-C-G-  
AA-----CA--GG Bacteria(100);Bacteroidetes(100);Flavobacteria(100);Flavobacteriales(100);Flavobacteriaceae(100);Chryseobacterium(100);unclassified(100);unclassified(100);unclassified(100);

Otu1377 0 0 0 0 0 0 0 0 0 0 0 0 0 0 0 0 0 0 0 0 0 0 0 0 0 0 0 0 0 0  
0 0 0 0 0 0 0 0 0 0 0 0 0 0 0 0 0 0 0 0 0 0 0 0 0 0 4 0 0  
0 0 0 0 0 0 0 0 0 0 0 0 0 0 0 0 0 0 0 0 0 0 0 0 0 0 0 0 0  
0 0 0 0 0 0 0 0 0 0 0 0 0 0 0 0 0 0 0 0 0 0 0 0 0 0 0  
M02255\_76\_000000000-ADUNE\_1\_2101\_8761\_13276 C---CG---GC-TA-ACT-----TCG-T-G-----C--C--A--G--CA-G-CCG-CG-----GT-A--A-T--AC-GA-----AG-G----GG-GC-TA-GC-----G-TT-GTT-C-G-----G--A-CT-A-T-T-----AA-  
---G-T-C-A-----G-G-G--G--TG--A-AA-TC--C-C-GG-G-G----CT-C-AA-----C-C-C-C-G-G-A--A-C---T-G-C-C---T-T-----T-GA-T-A--C-----T-G-G--TA--G-T-C---T-T-G-A-G-T-T---C-GA----GA-G-A-----G-G-T-G---AG-T-----GG--A--ATT---C-C-G-A-  
GT--GT-A-G-AG-GT--G---A--A-A---TT-C-GT-AG--AT-A-TT--C-G--G-A-G-G-A-AC-A-CC---AG--T--G--GC-GAA-G--G-C--G-----G--C-T-C-A---CTG--G--CT-C-G-----A-T---A-C-T--GA--CG-C-T-G--A-GG--T-G-CG-A--AA-G-C---G-TG--GG-G--AG-  
C-A-AA-----CA--GG Bacteria(100);Proteobacteria(100);Alphaproteobacteria(100);Rhizobiales(100);Phyllobacteriaceae(100);unclassified(100);unclassified(100);unclassified(100);unclassified(100);

Otu1378 0 0 0 0 0 0 0 0 0 0 0 0 0 0 0 0 0 0 0 0 0 0 0 0 0 0 0 0 0 0  
0 0 0 0 0 0 0 0 0 0 0 0 0 0 0 0 0 0 0 0 0 0 0 0 8 0 0 0 0  
0 0 0 0 0 0 0 0 0 0 0 0 0 0 0 0 0 0 0 0 0 0 0 0 0 0 0 0 0  
0 0 0 0 0 0 0 0 0 0 0 0 0 0 0 0 0 0 0 0 0 0 0 0 0 0 0  
M02255\_77\_000000000-ADUT3\_1\_1102\_7694\_8196 T---AC---AG-AG-GGG-----GCA-A-G-----C--G--T---T--GT-C-CGG-AT-----TT-A--C-T--GG-GC-----GT--A-----CA-GC-GC-GC-----G-CA-G-G-C-G-----G--A-CC-G-C-G-----  
AC---G-T-G-C-----C-G-T--G--TG--A-CA-AG--C-C-AC-C-G----CT-T-AC-----C-G-G-T-G-G-A--G-G---G-C--C-A---T-G-----G--TA-C-A---C-----G--A-G--CG--G-T-C---T-G-G-A-G-G--C---A-GG----GA-G-A-----G-G-G-A---TG-T-----GG--A--ATG---C-C-  
C-G-GT--GG-A-G-CG-GT--G---A--A-A---TG-C-GT-AG--AG-A-TC--G-G--G-C-G-G-A-AC-A-CC---AG--C--G--GC-GAA-G--G-C--G-----G--C-A-T-C---CTG--G--TC-C-T-----G-T---A-C-T--GA--CG-C-T-G--A-GG--C-G-CG-A--GA-G-C---G-TG--GG-G--  
AG-C-A-AA-----CT--GG Bacteria(100);unclassified(100);unclassified(100);unclassified(100);unclassified(100);unclassified(100);unclassified(100);unclassified(100);unclassified(100);

Otu1379 0 0 0 0 0 0 0 0 0 0 0 0 0 0 0 0 0 0 0 0 0 0 0 0 0 0 0 0 0 0  
0 0 0 0 0 0 0 0 0 0 0 0 0 0 0 0 0 0 0 0 0 0 0 14 0 0 0 0  
0 0 0 0 0 0 0 0 0 0 0 0 0 0 0 0 0 0 0 0 0 0 0 0 0 0 0 0 0  
0 0 0 0 0 0 0 0 0 0 0 0 0 0 0 0 0 0 0 0 0 0 0 0 0 0 0  
M02255\_77\_000000000-ADUT3\_1\_1101\_15610\_15008 T---AC---GA-AG-GGG-----GCT-A-G-----C--G--T---T--AC-T-CGG-AA-----TG-A--C-T--GG-GC-----GT--A-----AA-GG-GC-GC-----G-TA-G-G-C-G-----G--T-TT-G-T-T---  
-----TA---G-T-T-A-----G-G-C--G--TG--A-AA-TT--C-C-TG-G-G----CT-C-AA-----C-C-T-G-G-G-G--G-C---T-G-C-G---C--T-----T-AA-T-A--C-----A--G-G--CA--G-A-C---T-A-G-A-G-T-G---T-GA----AA-G-A-----G-G-G-T---CG-T-----GG--A--ATT---  
T-C-C-A-GT--GT-A-G-AG-GT--G---A--A-A---TT-C-GT-AG--AT-A-TT--G-G--A-A-A-G-A-AC-A-CC---GG--T--G--GC-GAA-G--G-C--G-----G--C-G-A-C---CTG--G--TT-C-A-----T-T---A-C-T--GA--CG-C-T-G--A-GG--C-G-CG-A--AA-G-C---G-TG--GG-  
G--AG-C-A-AA-----CA--GG Bacteria(100);Proteobacteria(100);Alphaproteobacteria(100);Rhodospirillales(100);Acetobacteraceae(100);unclassified(100);unclassified(100);unclassified(100);unclassified(100);



Otu1380 0 0 0 0 0 0 0 0 0 0 0 0 0 0 0 0 0 0 0 0 0 0 0 0 0 0 0 0 0  
0 0 0 0 0 0 0 0 0 0 0 0 0 0 0 0 0 0 0 0 0 0 0 0 69 0 0 0 0  
0 0 0 0 0 0 0 0 0 0 0 0 0 0 0 0 0 0 0 0 0 0 0 0 0 0 0 0 0  
0 0 0 0 0 0 0 0 0 0 0 0 0 0 0 0 0 0 0 0 0 0 0 0 0 0 0  
M02255\_77\_000000000-ADUT3\_1\_1104\_10079\_6749 T---AC---GA-AG-GGG-----GCT-A-G-----C--G--T---T--AC-T-CGG-AA-----TT-A--C-T--GG-GC-----GT--A----AA-GG-GC-GC-----G-TA-G-G-C-G-----G--C-GC-A-C-C-----  
AA---G-T-T-A-----G-G-C-G--TG--A-AA-GT--C-C-TG-G-G-----CT-C-AA-----C-C-T-G-G-G-A--A-C---T-G--C-G---C--T-----T--GA-T-A--C-----T--G-G--TG--T-G-C---T-T-G-A-G-G--A---T-GG----AA-G-A-----G-G-G-T---TG-T-----GG--A--ATT---C-C-C-  
A-GT--GT-A-G-AG-GT--G---A--A---TT-C-GT-AG--AT-A-TT--G-G--G-A-A-G-A-AC-A-CC--GG--T--G--GC-GAA-G--G-C--G-----G--C-A-A-C---CTG--G--TC-C-A-----T-T---A-C-T--GA--CG-C-T-G--A-GG--C-G-CG-A--CA-G-C---G-TG--GG-G--  
AG-C-A-AA-----CA--GG Bacteria(100);Proteobacteria(100);Alphaproteobacteria(100);Rhodospirillales(100);Acetobacteraceae(100);unclassified(100);unclassified(100);unclassified(100);unclassified(100);

Otu1381 0 0 0 0 0 0 0 0 0 0 0 0 0 0 0 0 0 0 0 0 0 0 0 0 0 0 0 0 0  
0 0 0 0 0 0 0 0 0 0 0 0 0 0 0 0 0 0 0 0 0 0 0 0 7 0 0 0 0  
0 0 0 0 0 0 0 0 0 0 0 0 0 0 0 0 0 0 0 0 0 0 0 0 0 0 0 0 0  
0 0 0 0 0 0 0 0 0 0 0 0 0 0 0 0 0 0 0 0 0 0 0 0 0 0 0  
M02255\_77\_000000000-ADUT3\_1\_1111\_22479\_10578 T---AC---GT-AG-GGT-----GCA-A-G-----C--A--T---T--AT-C-CGG-AG-----TG-A--C-T--GG-GC-----GT--A----AA-GA-GTTGC-----G-TA-G-G-C-G-----G--T-TA-G-T-A-----  
-----AA---G-C-G-A-----A-T-A--G--TG--A-AA-TC--T-G-GT-G-G-----CT-C-AA-----C-C-A-T-ACA-G--A-C---T-A--T-T---A--T-----T--CG-A-A--C-----T--C-A--CT--A-A-C---T-C-G-A-G-A--A---T-GG----TA-G-A-----G-G-T-A---AC-T-----GG--A--ATT---T-  
C-T-A-GT--GT-A-G-GA-GT--G---A--A---TC-C-GT-AG--AT-A-TT--A-G--A-A-G-G-A-AC-A-CC--AA--T--G--GC-GTA-G--G-C--A-----G--G-T-T-A---CTG--G--AC-C-A-----T-T---T-C-T--GA--CG-C-T-A--A-GG--C-A-CG-A--AA-G-C---G-TG--GG-G--  
AG-C-G-AA-----CC--GG Bacteria(100);Candidate\_division\_TM7(100);unclassified(100);unclassified(100);unclassified(100);unclassified(100);unclassified(100);unclassified(100);unclassified(100);

Otu1382 0 0 0 0 0 0 0 0 0 0 0 0 0 0 0 0 0 0 0 0 0 0 0 0 0 0 0 0 0  
0 0 0 0 0 0 0 0 0 0 0 0 0 0 0 0 0 0 0 0 0 0 0 0 28 0 0 0 0  
0 0 0 0 0 0 0 0 0 0 0 0 0 0 0 0 0 0 0 0 0 0 0 0 0 0 0 0 0  
0 0 0 0 0 0 0 0 0 0 0 0 0 0 0 0 0 0 0 0 0 0 0 0 0 0 0  
M02255\_77\_000000000-ADUT3\_1\_2101\_20143\_9713 G---AC---GG-AG-GGG-----GCT-A-G-----C--G--T---T--GT-T-CGG-AA-----TG-A--C-T--GG-GC-----GT--A----AA-GC-GC-GC-----G-TA-G-G-C-G-----G--T-TT-G-G-T-----  
AA---G-T-T-G-----G-A-T--G--TG--A-AA-GC--C-C-GG-G-G-----CT-C-AA-----C-C-C-C-G-G-A--T-G---T-G--C-G---T--T-----C--AA-A-A--C-----T--G-C--TA--G-A-C---T-T-G-A-G-A--C---C-GG----AA-G-G-----G-G-A-G---AG-C-----GG--A--ATT---C-C-  
C-A-GT--GT-A-G-AG-GT--G---A--A---TT-C-GT-AG--AT-A-TT--G-G--G-A-A-G-A-AC-A-CC--GG--T--G--GC-GAA-G--G-C--G-----G--C-T-C-T---CTG--G--TC-C-G-----G-T---T-C-T--GA--CG-C-T-G--A-GG--C-G-CG-A--AA-G-C---G-TG--GG-G--  
AG-C-A-AA-----CA--GG Bacteria(100);Proteobacteria(100);unclassified(100);unclassified(100);unclassified(100);unclassified(100);unclassified(100);unclassified(100);unclassified(100);

Otu1383 0 0 0 0 0 0 0 0 0 0 0 0 0 0 0 0 0 0 0 0 0 0 0 0 0 0 0 0 0  
0 0 0 0 0 0 0 0 0 0 0 0 0 0 0 0 0 0 0 0 0 0 0 0 7 0 0 0 0  
0 0 0 0 0 0 0 0 0 0 0 0 0 0 0 0 0 0 0 0 0 0 0 0 0 0 0 0 0  
0 0 0 0 0 0 0 0 0 0 0 0 0 0 0 0 0 0 0 0 0 0 0 0 0 0 0  
M02255\_77\_000000000-ADUT3\_1\_2105\_27610\_19560 G---AC---AG-AG-GAT-----GTA-A-G-----C--A--T---T--AT-C-TGG-AA-----TG-A--T-T--GG-GA-----AT--A----AA-AC-GT-CT-----G-TA-G-G-T-G-----G--C-TT-T-T-C-----  
-----AA---G-T-C-T-----G-T-C--G--TC--A-AA-CC--C-C-AG-G-G-----CT-C-AA-----C-C-C-T-G-G-A--T-A---G-G--T-G---G--T-----G--GA-A-A--C-----T--A-C--CA--A-G-C---T-G-G-A-G-T-A---C-GG----TA-G-G-----G-G-C-A--GA-G-----GG--A--ATT---T-  
T-C-G-AT--GG-A-G-TG-GT--G---A--A---TG-C-GT-TG--AG-A-TC--G-G--A-A-A-G-A-AC-A-CC--AA--C--G--GC-AAA-A--G-C--A-----C--T-C-T-G---CTG--G--GC-C-G-----A-C---A-C-T--AA--CA-C-T-G--A-GA--G-A-TG-A--AA-G-C---T-AG--GG-G-  
-AG-C-A-AA-----TG--GG Bacteria(100);Cyanobacteria(100);unclassified(100);unclassified(100);unclassified(100);unclassified(100);unclassified(100);unclassified(100);unclassified(100);

Otu1384 0 0 0 0 0 0 0 0 0 0 0 0 0 0 0 0 0 0 0 0 0 0 0 0 0 0 0 0 0  
0 0 0 0 0 0 0 0 0 0 0 0 0 0 0 0 0 0 0 0 0 0 0 0 10 0 0 0 0  
0 0 0 0 0 0 0 0 0 0 0 0 0 0 0 0 0 0 0 0 0 0 0 0 0 0 0 0 0  
0 0 0 0 0 0 0 0 0 0 0 0 0 0 0 0 0 0 0 0 0 0 0 0 0 0 0  
M02255\_77\_000000000-ADUT3\_1\_2106\_26844\_18278 T---AC---GA-AG-GGG-----GCG-A-G-----C--G--T---T--GT-T-CGG-AT-----TT-A--C-T--GG-GC-----GT--A----AA-GG-GC-GC-----G-CA-G-G-C-G-----G--C-GG-A-C-C---  
-----AA---G-T-C-A-----G-G-C--G--TG--A-AA-GC--C-C-CG-G-G-----CT-T-AA-----C-C-T-G-G-G-A--A-C---T-G--C-G---T--C-----T--GG-G-A--C-----T--G-G--TA--T-G-C---T-A-G-A-G-T--T---C-GG----GA-G-A-----G-G-A-G---AG-T-----GG--A--ATT---  
-C-C-C-A-GT--GT-A-G-AG-GT--G---A--A---TT-C-GT-AG--AT-A-TT--G-G--G-A-A-G-A-AC-A-CC--GG--T--G--GC-GAA-G--G-C--G-----G--C-T-C-T---CTG--G--AC-C-G-----A-G---A-C-T--GA--CG-C-T-G--A-GG--C-G-CG-A--AA-G-C---G-TG--  
GG-G--AG-C-A-AA-----CA--GG Bacteria(100);Proteobacteria(100);Alphaproteobacteria(100);Rhodospirillales(100);unclassified(100);unclassified(100);unclassified(100);unclassified(100);unclassified(100);



[illegible]



|                                                                                                                                                                                                                                                                                                                                                                                                                                                                                                                                                                                                                                                                                                                                                                                                          |   |   |   |   |   |   |   |   |   |   |   |   |   |   |   |   |   |   |   |   |   |   |   |    |   |   |   |
|----------------------------------------------------------------------------------------------------------------------------------------------------------------------------------------------------------------------------------------------------------------------------------------------------------------------------------------------------------------------------------------------------------------------------------------------------------------------------------------------------------------------------------------------------------------------------------------------------------------------------------------------------------------------------------------------------------------------------------------------------------------------------------------------------------|---|---|---|---|---|---|---|---|---|---|---|---|---|---|---|---|---|---|---|---|---|---|---|----|---|---|---|
| Otu1390                                                                                                                                                                                                                                                                                                                                                                                                                                                                                                                                                                                                                                                                                                                                                                                                  | 0 | 0 | 0 | 0 | 0 | 0 | 0 | 0 | 0 | 0 | 0 | 0 | 0 | 0 | 0 | 0 | 0 | 0 | 0 | 0 | 0 | 0 | 0 | 0  | 0 | 0 | 0 |
|                                                                                                                                                                                                                                                                                                                                                                                                                                                                                                                                                                                                                                                                                                                                                                                                          | 0 | 0 | 0 | 0 | 0 | 0 | 0 | 0 | 0 | 0 | 0 | 0 | 0 | 0 | 0 | 0 | 0 | 0 | 0 | 0 | 0 | 0 | 0 | 8  | 0 | 0 | 0 |
|                                                                                                                                                                                                                                                                                                                                                                                                                                                                                                                                                                                                                                                                                                                                                                                                          | 0 | 0 | 0 | 0 | 0 | 0 | 0 | 0 | 0 | 0 | 0 | 0 | 0 | 0 | 0 | 0 | 0 | 0 | 0 | 0 | 0 | 0 | 0 | 0  | 0 | 0 | 0 |
|                                                                                                                                                                                                                                                                                                                                                                                                                                                                                                                                                                                                                                                                                                                                                                                                          | 0 | 0 | 0 | 0 | 0 | 0 | 0 | 0 | 0 | 0 | 0 | 0 | 0 | 0 | 0 | 0 | 0 | 0 | 0 | 0 | 0 | 0 | 0 | 0  | 0 | 0 | 0 |
| M02255_77_000000000-ADUT3_1_1107_22063_15733 T---AC---GA-AG-GGG-----GCT-A-G-----C-G-T---T-GC-T-CGG-AA-----TT-A-C-T-GG-GC-----GT-A---AA-GG-GC-GC-----G-TA-G-G-C-G-----G-C-CT-T-G-T-----TA---G-T-C-A-----G-G-C-G--TG--A-AA-AT--C-C-CG-G-G----CT-T-AA-----C-C-T-G-G-G-G--A-C---T-G-C-G--C-T-----T-GA-T-A--C-----G-G-C-AG-G-G-C---T-T-G-A-G-G-A--T-GG----AA-G-A-----G-G-C-T--CG-T-----GG-A-ATT---C-C-C-A-GT--GT-A-G-AG-GT--G---A-A-A--TT-C-GT-AG--AT-A-TT--G-G-G-A-A-G-A-AC-A-CC--GG--T-G--GC-GAA-G-G-C-G-----G-C-G-A-G--CTG-G--TC-C-A-----T-T--A-C-T-GA--CG-C-T-G--A-GG--C-G-CG-A--CA-G-C--G-TG--GG-G--AG-C-A-AA-----CA--GG Bacteria(100);Proteobacteria(100);Alphaproteobacteria(100);Rhodospirillales(100);Acetobacteraceae(100);unclassified(100);unclassified(100);unclassified(100);unclassified(100); |   |   |   |   |   |   |   |   |   |   |   |   |   |   |   |   |   |   |   |   |   |   |   |    |   |   |   |
| Otu1391                                                                                                                                                                                                                                                                                                                                                                                                                                                                                                                                                                                                                                                                                                                                                                                                  | 0 | 0 | 0 | 0 | 0 | 0 | 0 | 0 | 0 | 0 | 0 | 0 | 0 | 0 | 0 | 0 | 0 | 0 | 0 | 0 | 0 | 0 | 0 | 0  | 0 | 0 | 0 |
|                                                                                                                                                                                                                                                                                                                                                                                                                                                                                                                                                                                                                                                                                                                                                                                                          | 0 | 0 | 0 | 0 | 0 | 0 | 0 | 0 | 0 | 0 | 0 | 0 | 0 | 0 | 0 | 0 | 0 | 0 | 0 | 0 | 0 | 0 | 0 | 15 | 0 | 0 | 0 |
|                                                                                                                                                                                                                                                                                                                                                                                                                                                                                                                                                                                                                                                                                                                                                                                                          | 0 | 0 | 0 | 0 | 0 | 0 | 0 | 0 | 0 | 0 | 0 | 0 | 0 | 0 | 0 | 0 | 0 | 0 | 0 | 0 | 0 | 0 | 0 | 0  | 0 | 0 | 0 |
|                                                                                                                                                                                                                                                                                                                                                                                                                                                                                                                                                                                                                                                                                                                                                                                                          | 0 | 0 | 0 | 0 | 0 | 0 | 0 | 0 | 0 | 0 | 0 | 0 | 0 | 0 | 0 | 0 | 0 | 0 | 0 | 0 | 0 | 0 | 0 | 0  | 0 | 0 | 0 |
| M02255_77_000000000-ADUT3_1_1113_24976_5924 T---AC---GA-AG-GGG-----GCT-A-G-----C-G-T---T-GT-T-CGG-AA-----TT-A-C-T-GG-GC-----GT-A---AA-GC-GC-AC-----G-TA-G-G-C-T-----G-A-TC-G-T-T-----AA---G-T-G-A-----G-G-G--G-TG--A-AA-TC--C-C-GA-G-G----CT-C-AA-----C-C-T-C-G-G-A--A-C---T-G-C-C--C-T-----T-CA-T-A--C-----T-G-G--CG-A-T-C---T-C-G-A-G-T-C--C-GG----AA-G-A-----G-G-T-T--AG-T-----GG-A-ATT---C-C-C-A-GT--GT-A-G-AG-GT--G---A-A-A--TT-C-GT-AG--AT-A-TT--G-G-G-A-A-G-A-AC-A-CC--AG--T-G--GC-GAA-G-G-C-G-----G-C-T-A-A--CTG-G--TC-C-G-----G-T--A-C-T-GA--CG-C-T-G--A-GG--T-G-CG-A--AA-G-C--G-TG--GG-G--AG-C-A-AA-----CA--GG Bacteria(100);Proteobacteria(100);Alphaproteobacteria(100);Rhizobiales(100);unclassified(100);unclassified(100);unclassified(100);unclassified(100);unclassified(100);          |   |   |   |   |   |   |   |   |   |   |   |   |   |   |   |   |   |   |   |   |   |   |   |    |   |   |   |
| Otu1392                                                                                                                                                                                                                                                                                                                                                                                                                                                                                                                                                                                                                                                                                                                                                                                                  | 0 | 0 | 0 | 0 | 0 | 0 | 0 | 0 | 0 | 0 | 0 | 0 | 0 | 0 | 0 | 0 | 0 | 0 | 0 | 0 | 0 | 0 | 0 | 0  | 0 | 0 | 0 |
|                                                                                                                                                                                                                                                                                                                                                                                                                                                                                                                                                                                                                                                                                                                                                                                                          | 0 | 0 | 0 | 0 | 0 | 0 | 0 | 0 | 0 | 0 | 0 | 0 | 0 | 0 | 0 | 0 | 0 | 0 | 0 | 0 | 0 | 0 | 0 | 15 | 0 | 0 | 0 |
|                                                                                                                                                                                                                                                                                                                                                                                                                                                                                                                                                                                                                                                                                                                                                                                                          | 0 | 0 | 0 | 0 | 0 | 0 | 0 | 0 | 0 | 0 | 0 | 0 | 0 | 0 | 0 | 0 | 0 | 0 | 0 | 0 | 0 | 0 | 0 | 0  | 0 | 0 | 0 |
|                                                                                                                                                                                                                                                                                                                                                                                                                                                                                                                                                                                                                                                                                                                                                                                                          | 0 | 0 | 0 | 0 | 0 | 0 | 0 | 0 | 0 | 0 | 0 | 0 | 0 | 0 | 0 | 0 | 0 | 0 | 0 | 0 | 0 | 0 | 0 | 0  | 0 | 0 | 0 |
| M02255_77_000000000-ADUT3_1_1113_6206_7782 T---AC---GT-AG-GGT-----GCA-A-G-----C-A-T---T-AT-C-CGG-AA-----TT-A-T-T-GG-GC-----GT-A---AA-GA-GT-TT-----G-TA-G-G-C-G-----G-T-AA-A-T-T-----AA---G-T-A-G-----G-A-G--G-TG--A-AA-TC--T-C-TG-G-G----CC-C-AA-----C-C-C-A-G-A-A-C-C--C-G-T-T--T-C-----C-TA-A-A--C-----T-G-G--TT-T-A-C---T-A-G-A-G-G-T--A-TG---TA-G-A-----G-G-T-A--AG-T-----GG-A-ATT---T-C-C-G-GT--GT-A-G-GG-GT--A---A-A-A--TC-C-GT-TG--AG-A-TC--G-G-A-A-G-G-A-AC-G-CC--AA-A-A-GC-GAA-G-G-C-A-----G-C-T-T-A--CTG-G--AC-A-T-----A--C-C-T-GA--CG-C-T-G--A-GA--A-A-CG-A--AA-G-C--G-TG--GG-G--AG-C-A-AA-----CA--GG Bacteria(100);unclassified(100);unclassified(100);unclassified(100);unclassified(100);unclassified(100);unclassified(100);unclassified(100);unclassified(100);                          |   |   |   |   |   |   |   |   |   |   |   |   |   |   |   |   |   |   |   |   |   |   |   |    |   |   |   |
| Otu1393                                                                                                                                                                                                                                                                                                                                                                                                                                                                                                                                                                                                                                                                                                                                                                                                  | 0 | 0 | 0 | 0 | 0 | 0 | 0 | 0 | 0 | 0 | 0 | 0 | 0 | 0 | 0 | 0 | 0 | 0 | 0 | 0 | 0 | 0 | 0 | 0  | 0 | 0 | 0 |
|                                                                                                                                                                                                                                                                                                                                                                                                                                                                                                                                                                                                                                                                                                                                                                                                          | 0 | 0 | 0 | 0 | 0 | 0 | 0 | 0 | 0 | 0 | 0 | 0 | 0 | 0 | 0 | 0 | 0 | 0 | 0 | 0 | 0 | 0 | 0 | 16 | 0 | 0 | 0 |
|                                                                                                                                                                                                                                                                                                                                                                                                                                                                                                                                                                                                                                                                                                                                                                                                          | 0 | 0 | 0 | 0 | 0 | 0 | 0 | 0 | 0 | 0 | 0 | 0 | 0 | 0 | 0 | 0 | 0 | 0 | 0 | 0 | 0 | 0 | 0 | 0  | 0 | 0 | 0 |
|                                                                                                                                                                                                                                                                                                                                                                                                                                                                                                                                                                                                                                                                                                                                                                                                          | 0 | 0 | 0 | 0 | 0 | 0 | 0 | 0 | 0 | 0 | 0 | 0 | 0 | 0 | 0 | 0 | 0 | 0 | 0 | 0 | 0 | 0 | 0 | 0  | 0 | 0 | 0 |
| M02255_77_000000000-ADUT3_1_2105_26397_18519 T---AC---AG-AG-GCC-----CCA-A-G-----C-G-T---T-AG-G-CGG-AA-----TC-A-C-T-GG-GC-----TT-A---AA-GC-GT-GT-----G-TA-G-G-C-G-----G--G-AT-G-G-T-----AA---G-T-A-C-----T-T-T-G--TG--A-AA-TC--C-C-AC-G-G----CT-C-AA-----C-T-G-T-G-G-A--A-T---                                                                                                                                                                                                                                                                                                                                                                                                                                                                                                                            |   |   |   |   |   |   |   |   |   |   |   |   |   |   |   |   |   |   |   |   |   |   |   |    |   |   |   |



|         |                                                                                                                                                                                                                     |    |   |   |   |    |   |   |   |   |   |   |   |    |    |    |   |   |   |   |   |   |   |   |   |   |  |  |
|---------|---------------------------------------------------------------------------------------------------------------------------------------------------------------------------------------------------------------------|----|---|---|---|----|---|---|---|---|---|---|---|----|----|----|---|---|---|---|---|---|---|---|---|---|--|--|
| Otu1395 | 0                                                                                                                                                                                                                   | 0  | 0 | 0 | 0 | 0  | 0 | 0 | 0 | 0 | 0 | 0 | 0 | 0  | 0  | 0  | 0 | 0 | 0 | 0 | 0 | 0 | 0 | 0 | 0 | 0 |  |  |
|         | 0                                                                                                                                                                                                                   | 0  | 0 | 0 | 0 | 0  | 0 | 0 | 0 | 0 | 0 | 0 | 0 | 0  | 0  | 0  | 0 | 0 | 0 | 0 | 0 | 0 | 0 | 0 | 0 | 0 |  |  |
|         | 0                                                                                                                                                                                                                   | 3  | 0 | 0 | 0 | 2  | 0 | 0 | 0 | 0 | 0 | 0 | 0 | 0  | 0  | 0  | 0 | 0 | 0 | 0 | 0 | 0 | 0 | 0 | 0 | 0 |  |  |
|         | 0                                                                                                                                                                                                                   | 0  | 0 | 0 | 0 | 0  | 0 | 0 | 0 | 0 | 0 | 0 | 0 | 0  | 0  | 0  | 0 | 0 | 0 | 0 | 0 | 0 | 0 | 0 | 0 | 0 |  |  |
|         | M02255_77_000000000-ADUT3_1_1107_22152_21720 T---AC--GT-AG-GTC-----CCG-A-G----C-G-T---T--GT-C-CGG-AT-----TT-A-T-T-GG-GC-----GT-A----AA-GC-GA-GC-----G-CA-G-G-T-G-----G-T-TT-A-A-T-----                              |    |   |   |   |    |   |   |   |   |   |   |   |    |    |    |   |   |   |   |   |   |   |   |   |   |  |  |
|         | ----AA----G-T-C-T-----G-A-T-G--TA--A-AA-GG--C-A-GT-G-G----CT-C-AA-----C-C-A-T-T-G-T-G-----T-G--C-A--T-T-----G--GA-A-A--C-----T-G-T-TA-G-A-C---T-T-G-A-G-T-G--C-AG----TA-G-A-----G-G-A-G--AG-T-----GG--A--ATT---C-   |    |   |   |   |    |   |   |   |   |   |   |   |    |    |    |   |   |   |   |   |   |   |   |   |   |  |  |
|         | C-A-T-GT--GT-A-G-CG-GT--G---A-A-A---TG-C-GT-AG--AT-A-TA-T-G-G-G-A-G-G-A-AC-A-CC--GG-T-T-G-GC-GAA-A-G-C-G-----G--C-T-C-T--CTG-G--AC-T-G-----T-A--A-C-T-GA-CA-C-T-G--A-GG--C-T-CG-A--AA-G-C---G-TG--GG-T-             |    |   |   |   |    |   |   |   |   |   |   |   |    |    |    |   |   |   |   |   |   |   |   |   |   |  |  |
|         | -AG-C-A-AA-----CA--GG Bacteria(100);Firmicutes(100);Bacilli(100);Lactobacillales(100);Streptococcaceae(100);Lactococcus(100);unclassified(100);unclassified(100);unclassified(100);                                 |    |   |   |   |    |   |   |   |   |   |   |   |    |    |    |   |   |   |   |   |   |   |   |   |   |  |  |
| Otu1396 | 0                                                                                                                                                                                                                   | 0  | 0 | 0 | 0 | 0  | 0 | 0 | 0 | 0 | 0 | 0 | 0 | 0  | 0  | 0  | 0 | 0 | 0 | 0 | 0 | 0 | 0 | 0 | 0 | 0 |  |  |
|         | 0                                                                                                                                                                                                                   | 0  | 0 | 0 | 0 | 0  | 0 | 0 | 0 | 0 | 0 | 0 | 0 | 0  | 0  | 0  | 0 | 0 | 0 | 0 | 0 | 0 | 0 | 0 | 0 | 0 |  |  |
|         | 0                                                                                                                                                                                                                   | 29 | 0 | 0 | 0 | 36 | 0 | 0 | 0 | 0 | 0 | 0 | 0 | 0  | 0  | 0  | 0 | 0 | 0 | 0 | 0 | 0 | 0 | 0 | 0 | 0 |  |  |
|         | 0                                                                                                                                                                                                                   | 0  | 0 | 0 | 0 | 0  | 0 | 0 | 0 | 0 | 0 | 0 | 0 | 0  | 0  | 0  | 0 | 0 | 0 | 0 | 0 | 0 | 0 | 0 | 0 | 0 |  |  |
|         | M02255_77_000000000-ADUT3_1_1105_12228_7051 T---AC--GA-AG-GGG-----GCT-A-G----C-G-T---T--GT-T-CGG-AT-----TT-A-C-T-GG-GC-----GT-A----AA-GC-GC-AC-----G-TA-G-G-C-G-----G-G-CT-A-A-T-----AA-                            |    |   |   |   |    |   |   |   |   |   |   |   |    |    |    |   |   |   |   |   |   |   |   |   |   |  |  |
|         | ---G-T-C-A-----G-G-G--G--TG--A-AA-TC--C-C-GG-G-G----CT-C-AA-----C-C-C-C-G-G-A-A-C---T-G--C-C--T-T-----T-GA-T-A--C-----T-G-T-TA-G-T-C---T-T-G-A-G-T-A--T-GG---AA-G-A-----G-G-T-G--AG-T-----GG--A--ATT---C-C-G-A-     |    |   |   |   |    |   |   |   |   |   |   |   |    |    |    |   |   |   |   |   |   |   |   |   |   |  |  |
|         | GT--GT-A-G-AG-GT--G---A-A-A---TT-C-GT-AG--AT-A-TT--C-G--G-A-G-G-A-AC-A-CC--AG--T-T-G--GC-GAA-G--G-C-G-----G--C-T-C-A--CTG-G--TC-C-A-----T-T--A-C-T-GA-CG-C-T-G--A-GG--T-G-CG-A--AA-G-C---G-TG--GG-G--AG-C-          |    |   |   |   |    |   |   |   |   |   |   |   |    |    |    |   |   |   |   |   |   |   |   |   |   |  |  |
|         | A-AA-----CA--GG Bacteria(100);Proteobacteria(100);Alphaproteobacteria(100);Rhizobiales(100);Brucellaceae(100);Ochrobactrum(100);unclassified(100);unclassified(100);unclassified(100);                              |    |   |   |   |    |   |   |   |   |   |   |   |    |    |    |   |   |   |   |   |   |   |   |   |   |  |  |
| Otu1397 | 0                                                                                                                                                                                                                   | 0  | 0 | 0 | 0 | 0  | 0 | 0 | 0 | 0 | 0 | 0 | 0 | 0  | 0  | 0  | 0 | 0 | 0 | 0 | 0 | 0 | 0 | 0 | 0 | 0 |  |  |
|         | 0                                                                                                                                                                                                                   | 0  | 0 | 0 | 0 | 0  | 0 | 0 | 0 | 0 | 0 | 0 | 0 | 0  | 0  | 0  | 0 | 0 | 0 | 0 | 0 | 0 | 0 | 0 | 0 | 0 |  |  |
|         | 0                                                                                                                                                                                                                   | 24 | 0 | 0 | 0 | 0  | 0 | 0 | 0 | 0 | 0 | 0 | 0 | 24 | 10 | 17 | 0 | 0 | 0 | 0 | 0 | 0 | 0 | 0 | 0 | 0 |  |  |
|         | 0                                                                                                                                                                                                                   | 0  | 0 | 0 | 0 | 0  | 0 | 0 | 0 | 0 | 0 | 0 | 0 | 0  | 0  | 0  | 0 | 0 | 0 | 0 | 0 | 0 | 0 | 0 | 0 | 0 |  |  |
|         | M02255_77_000000000-ADUT3_1_1106_2141_13736 T---AC--GT-AG-GGG-----GCA-A-G----C-G-T---T--AT-C-CGG-AT-----TT-A-C-T-GG-GT-----GT-A----AA-GG-GA-GC-----G-TA-G-A-C-G-----G--C-GA-A-G-C-----                              |    |   |   |   |    |   |   |   |   |   |   |   |    |    |    |   |   |   |   |   |   |   |   |   |   |  |  |
|         | AA----G-T-C-T-----G-A-A--G--TG--A-AA-AT--C-C-GG-G-G----CT-C-AA-----C-T-C-C-G-G-A-A-G---T-G--C-T--T-T-----G--GA-A-A--C-----T-G-T-TT-T-G-A---T-A-G-A-G-T-G--T-CG---GA-G-A-----G-G-T-A--AG-T-----GG--A--ATT---C-C-T-   |    |   |   |   |    |   |   |   |   |   |   |   |    |    |    |   |   |   |   |   |   |   |   |   |   |  |  |
|         | G-GT--GT-A-G-CG-GT--G---A-A-A---TG-C-GT-AG--AT-A-TC--A-G--G-A-A-G-A-AC-A-CC--GG--A-G--GC-GAA-G--G-C-G-----G--C-T-T-A--CTG-G--AC-G-A-----T-A--A-C-T-GA-CG-T-T-G--A-GG--C-T-CG-A--AA-G-C---G-TG--GG-A--               |    |   |   |   |    |   |   |   |   |   |   |   |    |    |    |   |   |   |   |   |   |   |   |   |   |  |  |
|         | AG-C-A-AA-----CA--GG Bacteria(100);Firmicutes(100);Clostridia(100);Clostridiales(100);Lachnospiraceae(100);Oribacterium(100);unclassified(100);unclassified(100);unclassified(100);                                 |    |   |   |   |    |   |   |   |   |   |   |   |    |    |    |   |   |   |   |   |   |   |   |   |   |  |  |
| Otu1398 | 0                                                                                                                                                                                                                   | 0  | 0 | 0 | 0 | 0  | 0 | 0 | 0 | 0 | 0 | 0 | 0 | 0  | 0  | 0  | 0 | 0 | 0 | 0 | 0 | 0 | 0 | 0 | 0 | 0 |  |  |
|         | 0                                                                                                                                                                                                                   | 0  | 0 | 0 | 0 | 0  | 0 | 0 | 0 | 0 | 0 | 0 | 0 | 0  | 0  | 0  | 0 | 0 | 0 | 0 | 0 | 0 | 0 | 0 | 0 | 0 |  |  |
|         | 0                                                                                                                                                                                                                   | 57 | 0 | 0 | 0 | 0  | 0 | 0 | 0 | 0 | 0 | 0 | 0 | 0  | 0  | 0  | 0 | 0 | 0 | 0 | 0 | 0 | 0 | 0 | 0 | 0 |  |  |
|         | 0                                                                                                                                                                                                                   | 0  | 0 | 0 | 0 | 0  | 0 | 0 | 0 | 0 | 0 | 0 | 0 | 0  | 0  | 0  | 0 | 0 | 0 | 0 | 0 | 0 | 0 | 0 | 0 | 0 |  |  |
|         | M02255_77_000000000-ADUT3_1_1106_14357_19836 T---AC--GT-AT-GTC-----GCA-A-G----C-G-T---T--AT-C-CGG-AA-----TT-A-T-T-GG-GC-----AT-A----AA-GG-GC-AT-----C-TA-G-G-C-G-----G--C-CC-T-G-T-----                             |    |   |   |   |    |   |   |   |   |   |   |   |    |    |    |   |   |   |   |   |   |   |   |   |   |  |  |
|         | ----AA----G-T-C-T-----A-G-G--G--TG--A-AA-AC--C-T-GC-G-G----CT-C-AA-----C-C-G-C-A-G-G--C-C---T-G--C-C--C-C-----G--GA-A-A--C-----T-A-T-AG--G-G-C---T-G-G-A-G-T-A--C-TG---GA-G-A-----G-G-T-G--GA-C-----GG--A--ACT---A- |    |   |   |   |    |   |   |   |   |   |   |   |    |    |    |   |   |   |   |   |   |   |   |   |   |  |  |
|         | C-A-C-GA--GT-A-G-AG-GT--G---A-A-A---TT-C-GT-AG--AT-A-TG--T-G--T-A-G-G-A-AT-G-CC--GA--T-T-G--AT-GAA-G--A-T-A-----G--T-T-C-A--CTG-G--AC-G-G-----T-A--A-C-T-GA--CG-C-T-G--A-AG--T-T-G-CG-A--AA-G-C---T-GG--GG-G-       |    |   |   |   |    |   |   |   |   |   |   |   |    |    |    |   |   |   |   |   |   |   |   |   |   |  |  |
|         | -AG-C-A-AA-----CA--GG Bacteria(100);Fusobacteria(100);Fusobacteria(100);Fusobacteriales(100);Leptotrichiaceae(100);Leptotrichia(100);unclassified(100);unclassified(100);unclassified(100);                         |    |   |   |   |    |   |   |   |   |   |   |   |    |    |    |   |   |   |   |   |   |   |   |   |   |  |  |
| Otu1399 | 0                                                                                                                                                                                                                   | 0  | 0 | 0 | 0 | 0  | 0 | 0 | 0 | 0 | 0 | 0 | 0 | 0  | 0  | 0  | 0 | 0 | 0 | 0 | 0 | 0 | 0 | 0 | 0 | 0 |  |  |
|         | 0                                                                                                                                                                                                                   | 0  | 0 | 0 | 0 | 0  | 0 | 0 | 0 | 0 | 0 | 0 | 0 | 0  | 0  | 0  | 0 | 0 | 0 | 0 | 0 | 0 | 0 | 0 | 0 | 0 |  |  |
|         | 0                                                                                                                                                                                                                   | 8  | 0 | 0 | 0 | 0  | 0 | 0 | 0 | 0 | 0 | 0 | 0 | 0  | 0  | 0  | 0 | 0 | 0 | 0 | 0 | 0 | 0 | 0 | 0 | 0 |  |  |
|         | 0                                                                                                                                                                                                                   | 0  | 0 | 0 | 0 | 0  | 0 | 0 | 0 | 0 | 0 | 0 | 0 | 0  | 0  | 0  | 0 | 0 | 0 | 0 | 0 | 0 | 0 | 0 | 0 | 0 |  |  |
|         | M02255_77_000000000-ADUT3_1_1110_16336_10523 T---AC--GT-AG-GGG-----GCA-A-G----C-G-T---T--GT-C-CGG-AA-----TG-A-C-T-GG-GC-----GT-A----AA-GG-GT-GT-----G-TA-G-G-C-G-----G--G-CT-C-G-C-----                             |    |   |   |   |    |   |   |   |   |   |   |   |    |    |    |   |   |   |   |   |   |   |   |   |   |  |  |
|         | -----AA----G-T-T-G-----G-A-T-G--TG--T-AA-TA--C-CCAG-A-G----CT-T-AA-----C-T-C-G-G-G-T-G-C---T-G--C-A--T-T-----T--GA-A-A--C-----T-A-C-GA-G-T-C---T-T-G-A-G-T-G--T-CG---GA-G-A-----G-G-T-A--AG-T-----GG--A--ATT---     |    |   |   |   |    |   |   |   |   |   |   |   |    |    |    |   |   |   |   |   |   |   |   |   |   |  |  |
|         | C-C-T-A-GT--GT-A-G-CG-GT--G---G--A-A---TG-C-GT-AG--AT-A-TT--A-G--G-A-G-G-A-AC-A-TC--AG--T-T-G--GC-GAA-G--G-C-G-----A--C-T-T-A--CTG-G--AC-G-A-----T-A--A-C-T-GA--CG-C-T-G--A-GG--C-A-CG-A--AA-G-C---G-TG--GG-        |    |   |   |   |    |   |   |   |   |   |   |   |    |    |    |   |   |   |   |   |   |   |   |   |   |  |  |
|         | G--AG-C-A-AA-----CA--GG Bacteria(100);unclassified(100);unclassified(100);unclassified(100);unclassified(100);unclassified(100);unclassified(100);unclassified(100);unclassified(100);                              |    |   |   |   |    |   |   |   |   |   |   |   |    |    |    |   |   |   |   |   |   |   |   |   |   |  |  |



|                                                                                                                                                                                                                            |   |    |     |   |    |    |   |   |    |    |   |   |   |   |   |     |    |   |   |   |   |   |   |   |   |   |   |
|----------------------------------------------------------------------------------------------------------------------------------------------------------------------------------------------------------------------------|---|----|-----|---|----|----|---|---|----|----|---|---|---|---|---|-----|----|---|---|---|---|---|---|---|---|---|---|
| Otu1400                                                                                                                                                                                                                    | 0 | 0  | 0   | 0 | 0  | 0  | 0 | 0 | 0  | 0  | 0 | 0 | 0 | 0 | 0 | 0   | 0  | 0 | 0 | 0 | 0 | 0 | 0 | 0 | 0 | 0 | 0 |
|                                                                                                                                                                                                                            | 0 | 0  | 0   | 0 | 0  | 0  | 0 | 0 | 0  | 0  | 0 | 0 | 0 | 0 | 0 | 0   | 0  | 0 | 0 | 0 | 0 | 0 | 0 | 0 | 0 | 0 | 0 |
|                                                                                                                                                                                                                            | 0 | 23 | 0   | 0 | 0  | 0  | 0 | 0 | 0  | 0  | 0 | 0 | 0 | 0 | 0 | 22  | 0  | 0 | 0 | 0 | 0 | 0 | 0 | 0 | 0 | 0 | 0 |
|                                                                                                                                                                                                                            | 0 | 0  | 0   | 0 | 0  | 0  | 0 | 0 | 0  | 0  | 0 | 0 | 0 | 0 | 0 | 0   | 0  | 0 | 0 | 0 | 0 | 0 | 0 | 0 | 0 | 0 |   |
| M02255_77_000000000-ADUT3_1_1111_13317_21543                                                                                                                                                                               |   |    |     |   |    |    |   |   |    |    |   |   |   |   |   |     |    |   |   |   |   |   |   |   |   |   |   |
| T---AC---GT-AG-GGG-----GCG-A-G-----C-G--T--T--GT-C-CGG-AA-----TG-A--C-T--GG-GC-----GT--A----AA-GG-GT-GC-----G-TA-G-G-T-G-----G--T-TT-A-A-T----                                                                             |   |    |     |   |    |    |   |   |    |    |   |   |   |   |   |     |    |   |   |   |   |   |   |   |   |   |   |
| -----AA---G-T-T-A-----G-A-A--G-TG--T-AA-TA--CCC-AG-G-G-----CT-T-AA-----C-T-C-G-G-G-T--G-C---T-G--C-T--T--C-----T-AA-A-A--C-----T--G-T--TA--G-G-C---T-T-G-A-G-T--G--T-AG-----TA-G-A-----G-G-A-A--AG-C-----GG--A--ATT----    |   |    |     |   |    |    |   |   |    |    |   |   |   |   |   |     |    |   |   |   |   |   |   |   |   |   |   |
| C-A-A-T-GT--GT-A-G-CG-GT--G---G--A-A--TG-C-GT-AG--AT-A-TA--T-T--G-A-A-G-A-AC-A-TC--AG--T--G--GC-GAA-G--G-C--G-----G--C-T-T-T--CTG--G--AC-T-A-----T-A---A-C-T--GA--CA-C-T-G--A-GG--C-A-CG-A--AA-G-C---G-TG--GG-             |   |    |     |   |    |    |   |   |    |    |   |   |   |   |   |     |    |   |   |   |   |   |   |   |   |   |   |
| G--AG-C-A-AA-----CA--GG Bacteria(100);Firmicutes(100);Clostridia(100);Clostridiales(100);Lachnospiraceae(100);uncultured(100);unclassified(100);unclassified(100);unclassified(100);                                       |   |    |     |   |    |    |   |   |    |    |   |   |   |   |   |     |    |   |   |   |   |   |   |   |   |   |   |
| Otu1401                                                                                                                                                                                                                    | 0 | 0  | 0   | 0 | 0  | 0  | 0 | 0 | 0  | 0  | 0 | 0 | 0 | 0 | 0 | 0   | 0  | 0 | 0 | 0 | 0 | 0 | 0 | 0 | 0 | 0 | 0 |
|                                                                                                                                                                                                                            | 0 | 0  | 0   | 0 | 0  | 0  | 0 | 0 | 0  | 0  | 0 | 0 | 0 | 0 | 0 | 0   | 0  | 0 | 0 | 0 | 0 | 0 | 0 | 0 | 0 | 0 | 0 |
|                                                                                                                                                                                                                            | 0 | 72 | 0   | 0 | 0  | 0  | 0 | 0 | 0  | 0  | 0 | 0 | 0 | 0 | 0 | 0   | 0  | 0 | 0 | 0 | 0 | 0 | 0 | 0 | 0 | 0 | 0 |
|                                                                                                                                                                                                                            | 0 | 0  | 0   | 0 | 0  | 0  | 0 | 0 | 0  | 0  | 0 | 0 | 0 | 0 | 0 | 0   | 0  | 0 | 0 | 0 | 0 | 0 | 0 | 0 | 0 | 0 |   |
| M02255_77_000000000-ADUT3_1_1112_13415_13065                                                                                                                                                                               |   |    |     |   |    |    |   |   |    |    |   |   |   |   |   |     |    |   |   |   |   |   |   |   |   |   |   |
| T---AC---GA-AG-GGG-----GCT-A-G-----C-G--T--T--GC-T-CGG-AA-----TG-A--C-T--GG-GC-----GT--A----AA-GG-GC-GC-----G-TA-G-G-C-G-----G--A-TG-G-T-T----                                                                             |   |    |     |   |    |    |   |   |    |    |   |   |   |   |   |     |    |   |   |   |   |   |   |   |   |   |   |
| -----CA---G-T-C-A-----G-A-C--G--TG--A-AA-TT--C-C-TG-G-G-----CT-T-AA-----C-C-T-G-G-G-G--G-C---T-G--C-G---T--T-----T--GA-G-A--C-----G--G-T--TC--A-T-C---T-A-G-A-G-T--T--T-GG-----AA-G-A-----G-G-G-T--CG-T-----GG--A--ATT---- |   |    |     |   |    |    |   |   |    |    |   |   |   |   |   |     |    |   |   |   |   |   |   |   |   |   |   |
| C-C-C-A-GT--GT-A-G-AG-GT--G---A--A-A--TT-C-GT-AG--AT-A-TT--G-G--G-A-A-G-A-AC-A-CC--GG--T--G--GC-GAA-G--G-C--G-----G--C-G-A-C--CTG--G--TC-C-T-----T-G---A-C-T--GA--CG-C-T-G--A-GG--C-G-CG-A--AA-G-C---G-TG--                |   |    |     |   |    |    |   |   |    |    |   |   |   |   |   |     |    |   |   |   |   |   |   |   |   |   |   |
| GG-G--AG-C-A-AA-----CA--GG Bacteria(100);Proteobacteria(100);Alphaproteobacteria(100);Rhodospirillales(100);Acetobacteraceae(100);unclassified(100);unclassified(100);unclassified(100);unclassified(100);                 |   |    |     |   |    |    |   |   |    |    |   |   |   |   |   |     |    |   |   |   |   |   |   |   |   |   |   |
| Otu1402                                                                                                                                                                                                                    | 0 | 0  | 0   | 0 | 0  | 0  | 0 | 0 | 0  | 0  | 0 | 0 | 0 | 0 | 0 | 0   | 0  | 0 | 0 | 0 | 0 | 0 | 0 | 0 | 0 | 0 | 0 |
|                                                                                                                                                                                                                            | 0 | 0  | 0   | 0 | 0  | 0  | 0 | 0 | 0  | 0  | 0 | 0 | 0 | 0 | 0 | 0   | 0  | 0 | 0 | 0 | 0 | 0 | 0 | 0 | 0 | 0 | 0 |
|                                                                                                                                                                                                                            | 0 | 38 | 159 | 0 | 83 | 20 | 0 | 0 | 65 | 24 | 0 | 0 | 0 | 0 | 0 | 166 | 0  | 0 | 0 | 0 | 0 | 0 | 0 | 0 | 0 | 0 | 0 |
|                                                                                                                                                                                                                            | 0 | 0  | 0   | 0 | 0  | 0  | 0 | 0 | 0  | 0  | 0 | 0 | 0 | 0 | 0 | 0   | 0  | 0 | 0 | 0 | 0 | 0 | 0 | 0 | 0 | 0 |   |
| M02255_77_000000000-ADUT3_1_1119_22138_19486                                                                                                                                                                               |   |    |     |   |    |    |   |   |    |    |   |   |   |   |   |     |    |   |   |   |   |   |   |   |   |   |   |
| T---AC---GT-AG-GTG-----GCG-A-G-----C-G--T--T--GT-C-CGG-AA-----TT-A--T-T--GG-GC-----GT--A----AA-GG-GT-GC-----G-TA-G-G-C-G-----G--C-TC-T-T-T-----                                                                            |   |    |     |   |    |    |   |   |    |    |   |   |   |   |   |     |    |   |   |   |   |   |   |   |   |   |   |
| -----AA---G-T-G-G-----G-A-T--G--TG--A-AA-TC--C-C-TG-G-G-----CT-C-AA-----C-C-C-A-G-G-A--A-C---T-G--C-A--T--T-----C--CA-A-A--C-----T--G-G--AG--A-G-C---T-A-G-A-G-T--G--C-AG-----GA-G-A-----G-G-A-A--AG-C-----GG--A--ATT----  |   |    |     |   |    |    |   |   |    |    |   |   |   |   |   |     |    |   |   |   |   |   |   |   |   |   |   |
| C-C-C-A-GT--GT-A-G-CG-GT--G---A--A-A--TG-C-GT-AG--AG-A-TT--G-G--G-A-G-G-A-AC-A-CC--AG--T--G--GC-GAA-G--G-C--G-----G--C-T-T-T--CTG--G--AC-T-G-----T-A---A-C-T--GA--CG-C-T-G--A-GG--C-A-CG-A--AA-G-C---G-TG--                |   |    |     |   |    |    |   |   |    |    |   |   |   |   |   |     |    |   |   |   |   |   |   |   |   |   |   |
| GG-G--AG-C-A-AA-----CA--GG Bacteria(100);Firmicutes(100);Clostridia(100);Clostridiales(100);Clostridiaceae(100);Caloramator(100);unclassified(100);unclassified(100);unclassified(100);                                    |   |    |     |   |    |    |   |   |    |    |   |   |   |   |   |     |    |   |   |   |   |   |   |   |   |   |   |
| Otu1403                                                                                                                                                                                                                    | 0 | 0  | 0   | 0 | 0  | 0  | 0 | 0 | 0  | 0  | 0 | 0 | 0 | 0 | 0 | 0   | 0  | 0 | 0 | 0 | 0 | 0 | 0 | 0 | 0 | 0 | 0 |
|                                                                                                                                                                                                                            | 0 | 0  | 0   | 0 | 0  | 0  | 0 | 0 | 0  | 0  | 0 | 0 | 0 | 0 | 0 | 0   | 0  | 0 | 0 | 0 | 0 | 0 | 0 | 0 | 0 | 0 | 0 |
|                                                                                                                                                                                                                            | 0 | 24 | 10  | 0 | 10 | 0  | 0 | 0 | 10 | 0  | 0 | 0 | 0 | 0 | 0 | 0   | 36 | 0 | 0 | 0 | 0 | 0 | 0 | 0 | 0 | 0 | 0 |
|                                                                                                                                                                                                                            | 0 | 0  | 0   | 0 | 0  | 0  | 0 | 0 | 0  | 0  | 0 | 0 | 0 | 0 | 0 | 0   | 0  | 0 | 0 | 0 | 0 | 0 | 0 | 0 | 0 | 0 |   |
| M02255_77_000000000-ADUT3_1_1102_16371_11042                                                                                                                                                                               |   |    |     |   |    |    |   |   |    |    |   |   |   |   |   |     |    |   |   |   |   |   |   |   |   |   |   |
| T---AC---GT-AG-GGG-----GCG-A-G-----C-G--T--T--GT-C-CGG-AA-----TT-A--C-T--GG-GC-----GT--A----AA-GA-GC-AC-----G-TA-G-G-C-G-----G--C-TA-T-A-A----                                                                             |   |    |     |   |    |    |   |   |    |    |   |   |   |   |   |     |    |   |   |   |   |   |   |   |   |   |   |
| -----AA---G-T-C-A-----G-A-T--G--TG--A-AA-AA--C-C-TG-G-G-----CT-C-AA-----C-C-G-A-G-G-G--T-A---T-G--C-A--T--C-----T--GA-A-A--C-----T--A-A--AT--A-G-C---T-T-G-A-G-T--C---A-AG-----GA-G-A-----G-G-A-G--AG-C-----GG--A--ATT---- |   |    |     |   |    |    |   |   |    |    |   |   |   |   |   |     |    |   |   |   |   |   |   |   |   |   |   |
| C-C-T-G-GT--GT-A-G-CG-GT--G---A--A-A--TG-C-GT-AG--AG-A-TC--A-G--G-A-A-G-A-AT-A-CC--AG--T--G--GC-GAA-A--G-C--G-----G--C-T-C-T--CTG--G--AC-T-T-----G-A---A-C-T--GA--CG-C-T-G--A-GG--T-G-CG-A--AA-G-C---G-TG--GG-             |   |    |     |   |    |    |   |   |    |    |   |   |   |   |   |     |    |   |   |   |   |   |   |   |   |   |   |
| G--AG-C-A-AA-----CA--GG Bacteria(100);Firmicutes(100);Clostridia(100);Thermoanaerobacterales(100);Family_III_Incertae_Sedis(100);Thermoanaerobacter(100);unclassified(100);unclassified(100);unclassified(100);            |   |    |     |   |    |    |   |   |    |    |   |   |   |   |   |     |    |   |   |   |   |   |   |   |   |   |   |
| Otu1404                                                                                                                                                                                                                    | 0 | 0  | 0   | 0 | 0  | 0  | 0 | 0 | 0  | 0  | 0 | 0 | 0 | 0 | 0 | 0   | 0  | 0 | 0 | 0 | 0 | 0 | 0 | 0 | 0 | 0 | 0 |
|                                                                                                                                                                                                                            | 0 | 0  | 0   | 0 | 0  | 0  | 0 | 0 | 0  | 0  | 0 | 0 | 0 | 0 | 0 | 0   | 0  | 0 | 0 | 0 | 0 | 0 | 0 | 0 | 0 | 0 | 0 |
|                                                                                                                                                                                                                            | 4 | 0  | 0   | 0 | 0  | 0  | 4 | 0 | 0  | 0  | 0 | 0 | 0 | 0 | 0 | 0   | 0  | 0 | 5 | 7 | 0 | 0 | 0 | 0 | 0 | 0 | 0 |
|                                                                                                                                                                                                                            | 0 | 0  | 0   | 0 | 0  | 0  | 0 | 0 | 0  | 0  | 0 | 0 | 0 | 0 | 0 | 0   | 0  | 0 | 0 | 0 | 0 | 0 | 0 | 0 | 0 | 0 |   |
| M02255_76_000000000-ADUNE_1_2114_28128_18151                                                                                                                                                                               |   |    |     |   |    |    |   |   |    |    |   |   |   |   |   |     |    |   |   |   |   |   |   |   |   |   |   |
| T---AC---GA-AG-GGG-----GCT-A-G-----C-G--T--T--GC-T-CGG-AA-----TT-A--C-T--GG-GC-----GT--A----AA---G--G-----G--A-----G---C--G-T-T-----                                                                                       |   |    |     |   |    |    |   |   |    |    |   |   |   |   |   |     |    |   |   |   |   |   |   |   |   |   |   |
| AG---G-T-T-A-----G-A-G--G--TG--A-AA-GC--C-C-AG-G-G-----CT-C-AA-----C-C-T-T-G-G-A--A-T---T-G--C-C---T--T-----T--GA-T-A--C-----T--G-G--CA--G-T-C---T-T-G-A-G-T-A--C-GG-----AA-G-A-----G-G-T-A--TG-T-----GG--A--ACT---C-C-G-  |   |    |     |   |    |    |   |   |    |    |   |   |   |   |   |     |    |   |   |   |   |   |   |   |   |   |   |
| A-GT--GT-A-G-AG-GT--G---A--A-A--TT-C-GT-AG--AT-A-TT--C-G--G-A-A-G-A-AC-A-CC--AG--T--G--GC-GAA-G--G-C--G-----A--C-A-T-A--CTG--G--TC-C-G-----T-T---A-C-T--GA--CG-C-T-G--A-GG--C-T-CG-A--AA-G-C---G-TG--GG-G--AG-             |   |    |     |   |    |    |   |   |    |    |   |   |   |   |   |     |    |   |   |   |   |   |   |   |   |   |   |
| C-A-AA-----CA--GG Bacteria(100);Proteobacteria(100);Alphaproteobacteria(100);Caulobacterales(100);Caulobacteraceae(100);Caulobacter(100);unclassified(100);unclassified(100);unclassified(100);                            |   |    |     |   |    |    |   |   |    |    |   |   |   |   |   |     |    |   |   |   |   |   |   |   |   |   |   |



|                                                                                                                                                                                                                             |   |   |    |   |    |   |   |   |    |    |   |   |   |   |   |    |   |   |   |   |   |   |   |   |   |   |   |
|-----------------------------------------------------------------------------------------------------------------------------------------------------------------------------------------------------------------------------|---|---|----|---|----|---|---|---|----|----|---|---|---|---|---|----|---|---|---|---|---|---|---|---|---|---|---|
| Otu1405                                                                                                                                                                                                                     | 0 | 0 | 0  | 0 | 0  | 0 | 0 | 0 | 0  | 0  | 0 | 0 | 0 | 0 | 0 | 0  | 0 | 0 | 0 | 0 | 0 | 0 | 0 | 0 | 0 | 0 | 0 |
|                                                                                                                                                                                                                             | 0 | 0 | 0  | 0 | 0  | 0 | 0 | 0 | 0  | 0  | 0 | 0 | 0 | 0 | 0 | 0  | 0 | 0 | 0 | 0 | 0 | 0 | 0 | 0 | 0 | 0 | 0 |
|                                                                                                                                                                                                                             | 0 | 8 | 0  | 0 | 0  | 0 | 0 | 0 | 0  | 0  | 0 | 0 | 0 | 0 | 0 | 0  | 0 | 0 | 0 | 0 | 0 | 0 | 0 | 0 | 0 | 0 | 0 |
|                                                                                                                                                                                                                             | 0 | 0 | 0  | 0 | 0  | 0 | 0 | 0 | 0  | 0  | 0 | 0 | 0 | 0 | 0 | 0  | 0 | 0 | 0 | 0 | 0 | 0 | 0 | 0 | 0 | 0 | 0 |
| M02255_76_000000000-ADUNE_1_2105_9336_13064 C---GG---CT-AA-CTT-----CGT-G-C-----C--A--G---C--AG-C-CGC-GG-----TA-A--T-A--CG-AA-----GG--A---TC-CA-AG-CG-----T-TA-T-C-C-G-----GA-T-TT-A-T-T-----AA--                            |   |   |    |   |    |   |   |   |    |    |   |   |   |   |   |    |   |   |   |   |   |   |   |   |   |   |   |
| --G-T-C-A-----G-A-G--G--TG--A-AA-GC--C-T-GG-A-G----CT-T-AA-----C-T-C-C-A-G-A--A-C---T-G--C-C---T--T-----T--GA-T-A--C-----T--G-A--TG--A-G-C---T-T-G-A-A-T--A--T-AG-----TT-G-A-----G-G-T-A--GG-C-----GG--A--ATG---T-G-T-C-    |   |   |    |   |    |   |   |   |    |    |   |   |   |   |   |    |   |   |   |   |   |   |   |   |   |   |   |
| AT--GT-A-G-CG-GT--G---A--A---TG-C-TT-AG--AT-A-TG--A-C--A-C-A-G-A-AC-A-CC--GA--T--T--GC-GAA-G--G-C-A-----G--C-T-T-G---CTA--A--AC-T-A-----T-A--A-T-T--GA--CG-C-T-G--A-GG--C-A-CT-A--AA-G-C---G-TG--GG-G--AT-C-                |   |   |    |   |    |   |   |   |    |    |   |   |   |   |   |    |   |   |   |   |   |   |   |   |   |   |   |
| A-AA-----CA--GG     Bacteria(100);Bacteroidetes(100);Sphingobacteria(100);Sphingobacteriales(100);unclassified(100);unclassified(100);unclassified(100);unclassified(100);unclassified(100);                                |   |   |    |   |    |   |   |   |    |    |   |   |   |   |   |    |   |   |   |   |   |   |   |   |   |   |   |
| Otu1406                                                                                                                                                                                                                     | 0 | 0 | 0  | 0 | 0  | 0 | 0 | 0 | 0  | 0  | 0 | 0 | 0 | 0 | 0 | 0  | 0 | 0 | 0 | 0 | 0 | 0 | 0 | 0 | 0 | 0 | 0 |
|                                                                                                                                                                                                                             | 0 | 0 | 0  | 0 | 0  | 0 | 0 | 0 | 0  | 0  | 0 | 0 | 0 | 0 | 0 | 0  | 0 | 0 | 0 | 0 | 0 | 0 | 0 | 0 | 0 | 0 | 0 |
|                                                                                                                                                                                                                             | 0 | 1 | 0  | 0 | 2  | 0 | 0 | 1 | 0  | 0  | 0 | 0 | 0 | 0 | 0 | 0  | 0 | 0 | 9 | 1 | 0 | 0 | 0 | 0 | 0 | 0 | 0 |
|                                                                                                                                                                                                                             | 0 | 0 | 0  | 0 | 0  | 0 | 0 | 0 | 0  | 0  | 0 | 0 | 0 | 0 | 0 | 0  | 0 | 0 | 0 | 0 | 0 | 0 | 0 | 0 | 0 | 0 | 0 |
| M02255_76_000000000-ADUNE_1_2104_10973_9965 G---AC---GT-AG-GAT-----GCA-A-G-----C--G--T---T--GT-C-CGG-AT-----TT-A--T-T--GG-GC-----GT--A---AA-G--G-----G-T-----T-C-----G---T---T-----AA---G-T-                                |   |   |    |   |    |   |   |   |    |    |   |   |   |   |   |    |   |   |   |   |   |   |   |   |   |   |   |
| C-T-----G-A-T--G--TT--A-AA-GA--T-C-GG-G-G----CT-C-AA-----C-C-T-C-G-G-G--A-G---T-G--C-A---T--T-----G--GA-T-A--C-----T--G-G--CA--G-A-C---T-G-G-A-G-T--G---T-GG-----TA-G-A-----G-G-T-T---AG-T-----GG--A--ATT---C-C-C-A-GT--GT- |   |   |    |   |    |   |   |   |    |    |   |   |   |   |   |    |   |   |   |   |   |   |   |   |   |   |   |
| A-G-CG-GT--G---A--A---TG-C-GT-AG--AT-A-TT--G-G--G-A-A-G-A-AC-A-CC--AG--T--G--GC-GTA-G--G-C-G-----A--C-T-A-A---CTG--G--GC-C-A-----T-A--A-C-T--GA--CG-C-T-G--A-GG--A-A-CG-A--AA-G-C---C-AG--GG-G--AG-C-G-AA--                 |   |   |    |   |    |   |   |   |    |    |   |   |   |   |   |    |   |   |   |   |   |   |   |   |   |   |   |
| -----TG--GG     Bacteria(100);Cyanobacteria(100);MLE1-12(100);unclassified(100);unclassified(100);unclassified(100);unclassified(100);unclassified(100);unclassified(100);                                                  |   |   |    |   |    |   |   |   |    |    |   |   |   |   |   |    |   |   |   |   |   |   |   |   |   |   |   |
| Otu1407                                                                                                                                                                                                                     | 0 | 0 | 0  | 0 | 0  | 0 | 0 | 0 | 0  | 0  | 0 | 0 | 0 | 0 | 0 | 0  | 0 | 0 | 0 | 0 | 0 | 0 | 0 | 0 | 0 | 0 | 0 |
|                                                                                                                                                                                                                             | 0 | 0 | 0  | 0 | 0  | 0 | 0 | 0 | 0  | 0  | 0 | 0 | 0 | 0 | 0 | 0  | 0 | 0 | 0 | 0 | 0 | 0 | 0 | 0 | 0 | 0 | 0 |
|                                                                                                                                                                                                                             | 0 | 6 | 0  | 1 | 0  | 0 | 0 | 0 | 0  | 0  | 0 | 0 | 0 | 0 | 0 | 0  | 0 | 0 | 0 | 0 | 0 | 3 | 0 | 0 | 0 | 0 | 0 |
|                                                                                                                                                                                                                             | 0 | 0 | 0  | 0 | 0  | 0 | 0 | 0 | 0  | 0  | 0 | 0 | 0 | 0 | 0 | 0  | 0 | 0 | 0 | 0 | 0 | 0 | 0 | 0 | 0 | 0 | 0 |
| M02255_76_000000000-ADUNE_1_1108_20360_19990        ....AC---T-AC-GT-----GCC-A-G-----C--A--G---C--CG-C-GGT-AA-----TA-C--G-T--AG-GT-----GG--C---AA-GC-G--TT-----G---T-C-C-G-----G--T-TT-C-T-T-----                           |   |   |    |   |    |   |   |   |    |    |   |   |   |   |   |    |   |   |   |   |   |   |   |   |   |   |   |
| AA---G-T-C-T-----G-A-T--G--TG--A-AA-GC--C-C-CC-G-G----CT-C-AA-----C-C-G-G-G-G-A-G-----G-GT-C-A---T--T-----G--GA-A-A--C-----T--G-G--GG--A-A-C---T-T-G-A-G-T--G---C-AG-----AA-G-A-----G-G-A-G---AG-T-----GG--A--ATT---C-C-    |   |   |    |   |    |   |   |   |    |    |   |   |   |   |   |    |   |   |   |   |   |   |   |   |   |   |   |
| A-C-GT--GT-A-G-CG-GT--G---A--A---TG-C-GT-AG--AG-A-TG--T-G--G-A-G-G-A-AC-A-CC--AG--T--G--GC-GAA-G--G-C-G-----A--C-T-C-T---CTG--G--TC-T-G-----T-A--A-C-T--GA--CG-C-T-G--A-GG--A-G-CG-A--AA-G-C---G-TG--GG-G--                 |   |   |    |   |    |   |   |   |    |    |   |   |   |   |   |    |   |   |   |   |   |   |   |   |   |   |   |
| AG-C-G-AA-----CA--GG     Bacteria(100);Firmicutes(100);Bacilli(100);unclassified(100);unclassified(100);unclassified(100);unclassified(100);unclassified(100);unclassified(100);                                            |   |   |    |   |    |   |   |   |    |    |   |   |   |   |   |    |   |   |   |   |   |   |   |   |   |   |   |
| Otu1408                                                                                                                                                                                                                     | 0 | 0 | 0  | 0 | 0  | 0 | 0 | 0 | 0  | 0  | 0 | 0 | 0 | 0 | 0 | 0  | 0 | 0 | 0 | 0 | 0 | 0 | 0 | 0 | 0 | 0 | 0 |
|                                                                                                                                                                                                                             | 0 | 0 | 0  | 0 | 0  | 0 | 0 | 0 | 0  | 0  | 0 | 0 | 0 | 0 | 0 | 0  | 0 | 0 | 0 | 0 | 0 | 0 | 0 | 0 | 0 | 0 | 0 |
|                                                                                                                                                                                                                             | 0 | 0 | 61 | 0 | 37 | 5 | 0 | 0 | 14 | 10 | 1 | 0 | 0 | 0 | 0 | 75 | 0 | 0 | 0 | 0 | 0 | 0 | 0 | 0 | 0 | 0 | 0 |
|                                                                                                                                                                                                                             | 0 | 0 | 0  | 0 | 0  | 0 | 0 | 0 | 0  | 0  | 0 | 0 | 0 | 0 | 0 | 0  | 0 | 0 | 0 | 0 | 0 | 0 | 0 | 0 | 0 | 0 | 0 |
| M02255_77_000000000-ADUT3_1_1102_9741_16744 T---AC---GT-AG-GTG-----GCG-A-G-----C--G--T---T--GT-C-CGG-AA-----TT-A--T-T--GG-GC-----GT--A---AA-GG-GT-GC-----G-TA-G-G-C-G-----G--T-AG-T-T-T-----AA-                             |   |   |    |   |    |   |   |   |    |    |   |   |   |   |   |    |   |   |   |   |   |   |   |   |   |   |   |
| ---G-T-G-G-----G-G-C--G--TG--A-AA-TC--C-C-CG-G-G----CT-T-AA-----C-C-C-G-G-G-A-G-C---T-G--C-G--C--T-----C--CA-A-A--C-----T--G-G--AC--T-A-C---T-C-G-A-G-T--G---C-AG-----GA-G-A-----G-G-A-A---AG-C-----GG--A--ATT---C-C-C-A-   |   |   |    |   |    |   |   |   |    |    |   |   |   |   |   |    |   |   |   |   |   |   |   |   |   |   |   |
| GT--GT-A-G-CG-GT--G---A--A---TG-C-GT-AG--AG-A-TT--G-G--G-A-G-G-A-AC-A-CC--AG--T--G--GC-GAA-G--G-C-G-----G--C-T-T-T---CTG--G--AC-T-G-----T-A--A-C-T--GA--CG-C-T-G--A-GG--C-A-CG-A--AA-G-C---G-TG--GG-G--AG-                  |   |   |    |   |    |   |   |   |    |    |   |   |   |   |   |    |   |   |   |   |   |   |   |   |   |   |   |
| C-A-AA-----CA--GG     Bacteria(100);unclassified(100);unclassified(100);unclassified(100);unclassified(100);unclassified(100);unclassified(100);unclassified(100);                                                          |   |   |    |   |    |   |   |   |    |    |   |   |   |   |   |    |   |   |   |   |   |   |   |   |   |   |   |
| Otu1409                                                                                                                                                                                                                     | 0 | 0 | 0  | 0 | 0  | 0 | 0 | 0 | 0  | 0  | 0 | 0 | 0 | 0 | 0 | 0  | 0 | 0 | 0 | 0 | 0 | 0 | 0 | 0 | 0 | 0 | 0 |
|                                                                                                                                                                                                                             | 0 | 0 | 0  | 0 | 0  | 0 | 0 | 0 | 0  | 0  | 0 | 0 | 0 | 0 | 0 | 0  | 0 | 0 | 0 | 0 | 0 | 0 | 0 | 0 | 0 | 0 | 0 |
|                                                                                                                                                                                                                             | 0 | 0 | 16 | 0 | 0  | 0 | 2 | 2 | 1  | 0  | 0 | 0 | 0 | 0 | 0 | 2  | 0 | 0 | 0 | 0 | 0 | 0 | 0 | 0 | 0 | 0 | 0 |
|                                                                                                                                                                                                                             | 0 | 0 | 0  | 0 | 0  | 0 | 0 | 0 | 0  | 0  | 0 | 0 | 0 | 0 | 0 | 0  | 0 | 0 | 0 | 0 | 0 | 0 | 0 | 0 | 0 | 0 | 0 |
| M02255_77_000000000-ADUT3_1_1119_19729_8193 T---AC---GT-AG-GGT-----CCA-A-G-----C--G--T---T--AA-T-CGG-AA-----TT-A--C-T--GG-GC-----GT--A---AA-GC-GT-GC-----G-CA-G-G-C-G-----G--T-TG-T-G-C-----AA-                             |   |   |    |   |    |   |   |   |    |    |   |   |   |   |   |    |   |   |   |   |   |   |   |   |   |   |   |
| ---G-A-C-C-----G-A-T--G--TG--A-AA-TC--C-C-CG-A-G----CT-T-AA-----C-T-T-G-G-G-A-A-T---T-G--C-A---T--T-----G--GT-G-A--C-----T--G-C--AC--G-G-C---T-A-G-A-G-T--G---T-GT-----CA-G-A-----G-G-G-G---GG-T-----AG--A--ATT---C-C-A-C-  |   |   |    |   |    |   |   |   |    |    |   |   |   |   |   |    |   |   |   |   |   |   |   |   |   |   |   |
| GT--GT-A-G-CA-GT--G---A--A---TG-C-GT-AG--AG-A-TG--T-G--G-A-G-G-A-AT-A-CC--GA--T--G--GC-GAA-G--G-C-A-----G--C-C-C-C---CTG--G--GA-T-A-----A-C---A-C-T--GA--CG-C-T-C--A-TG--C-A-CG-A--AA-G-C---G-TG--GG-G--AG-                 |   |   |    |   |    |   |   |   |    |    |   |   |   |   |   |    |   |   |   |   |   |   |   |   |   |   |   |
| C-A-AA-----CA--GG     Bacteria(100);Proteobacteria(100);Betaproteobacteria(100);Burkholderiales(100);Burkholderiaceae(100);Ralstonia(100);unclassified(100);unclassified(100);unclassified(100);                            |   |   |    |   |    |   |   |   |    |    |   |   |   |   |   |    |   |   |   |   |   |   |   |   |   |   |   |



Otu1410 0 0 0 0 0 0 0 0 0 0 0 0 0 0 0 0 0 0 0 0 0 0 0 0 0 0 0 0 0  
0 0 0 0 0 0 0 0 0 0 0 0 0 0 0 0 0 0 0 0 0 0 0 0 0 0 0 0 0  
0 0 15 0 0 0 0 0 0 0 0 0 0 0 0 0 0 0 0 0 0 0 0 0 0 0 0 0 0  
0 0 0 0 0 0 0 0 0 0 0 0 0 0 0 0 0 0 0 0 0 0 0 0 0 0 0 0 0  
M02255\_77\_000000000-ADUT3\_1\_1110\_28706\_16264 T---AC---GT-AG-GGG-----GCA-A-G-----C-G-T---T--GT-C-CGG-AA-----TT-A--T-T--GG-GC-----GT-A----AA-GC-GC-GC-----G-CA-G-G-C-G-----G--T-TA-A-T-T-----  
-----AA---G-T-C-A-----G-G-T--G--TG--A-AA-GG--C-T-AC-G-G----CT-C-AA-----C-C-G-T-A-G-A-G-----T-TG-C-A---T-T-----T--GA-A-A---C-----T--G-G--TT--A-A-C---T-T-G-A-G-T--G---C-AG----GA-G-A-----G-G-T-A---AG-T-----GG--A--ATT----C-  
C-C-G-GT--GT-A-G-CG-GT--G---G--A-A---TG-C-GT-AG--AG-A-TC--G-G--G-A-G-G-A-AC-A-CC---AG--T--G--GC-GAA-G--G-C-G-----G--C-T-T-A---CTG--G--CC-T-G-----C-A---A-C-T--GA--CG-C-T-G--A-GG--C-G-CG-A--AA-G-C---G-TG--GG-  
G--AG-C-A-AA-----CA--GG Bacteria(100);Firmicutes(100);unclassified(100);unclassified(100);unclassified(100);unclassified(100);unclassified(100);unclassified(100);unclassified(100);

Otu1411 0 0 0 0 0 0 0 0 0 0 0 0 0 0 0 0 0 0 0 0 0 0 0 0 0 0 0 0 0  
0 0 0 0 0 0 0 0 0 0 0 0 0 0 0 0 0 0 0 0 0 0 0 0 0 0 0 0 0  
0 0 6 2 0 0 0 0 0 0 4 0 0 0 0 0 0 0 0 0 0 0 0 0 0 0 0 0 0  
0 0 0 0 0 0 0 0 0 0 0 0 0 0 0 0 0 0 0 0 0 0 0 0 0 0 0 0 0  
M02255\_76\_000000000-ADUNE\_1\_2114\_22876\_15582 T---AA---GG-AC-CGG-----CTA-A-C-----T--A--C---G-TG-C-CAG-CA-----GC-C-G-C--GG-TA-----AT--A----CG-TA-GG-GT-----C-CA-A-G-C-G-----T--T-AA-TCG-G-----  
-----AA---G-A-C-C-----G-A-T--G--TG--A-AA-TC--C-C-CG-A-G----CT-T-AA-----C-T-T-G-G-G-A--A-T---T-G--C-A---T-T-----G--GT-G-A---C-----T--G-C--AC--G-G-C---T-A-G-A-G-T--G---T-GT----CA-G-A-----G-G-G-G---GG-T-----AG--A--ATT----C-  
C-A-C-GT--GT-A-G-CA-GT--G---A--A-A---TG-C-GT-AG--AG-A-TG--T-G--G-A-G-G-A-AT-A-CC---GA--T--G--GC-GAA-G--G-C-A-----G--C-C-C-C---CTG--G--GA-T-A-----A-C---A-C-T--GA--CG-C-T-C--A-TG--C-A-CG-A--AA-G-C---G-TG--GG-  
G--AG-C-A-AA-----CA--GG Bacteria(100);Proteobacteria(100);Betaproteobacteria(100);Burkholderiales(100);unclassified(100);unclassified(100);unclassified(100);unclassified(100);unclassified(100);

Otu1412 0 0 0 0 0 0 0 0 0 0 0 0 0 0 0 0 0 0 0 0 0 0 0 0 0 0 0 0 0  
0 0 0 0 0 0 0 0 0 0 0 0 0 0 0 0 0 0 0 0 0 0 0 0 0 0 0 0 0  
0 0 0 0 0 0 0 0 0 0 0 0 0 0 0 0 0 0 0 0 0 0 0 0 0 0 0 0 0  
29 0 0 0 0 0 0 0 0 0 0 0 0 0 0 0 0 0 0 0 0 0 0 0 0 0 0 0  
M02255\_77\_000000000-ADUT3\_1\_1104\_21040\_19221 T---AC---GT-AG-GTG-----GCA-A-G-----C-G-T---T--GT-C-CGG-AT-----TT-A--C-T--GG-GT-----GT-A----AA-GG-GG-GC-----G-CA-G-G-C-G-----G--G-AA-G-C-T-----  
-----AA---G-T-T-G-----G-A-T--G--TG--A-AA-TA--C-C-GG-G-G----CT-C-AA-----C-T-C-C-G-G-A--G-C---T-G--C-A---T-C-----C--AA-A-A---C-----T--G-G--TT--T-T-C---T-T-G-A-G-T--G---G-AG----TA-G-A-----G-G-C-A---AG-C-----GG--A--ATT----C-  
C-C-G-A-GT--GT-A-G-CG-GT--G---A--A-A---TG-C-GT-AG--AT-A-TT--C-G--G-A-G-G-A-AC-A-CC---AG--T--G--GC-GAA-G--G-C-G-----G--C-T-T-G---CTG--G--GC-T-C-----T-A---A-C-T--GA--CG-C-T-G--A-GG--C-C-CG-A--AA-G-C---G-TG--GG-  
G--AG-C-A-AA-----CA--GG Bacteria(100);unclassified(100);unclassified(100);unclassified(100);unclassified(100);unclassified(100);unclassified(100);unclassified(100);unclassified(100);

Otu1413 0 0 0 0 0 0 0 0 0 0 0 0 0 0 0 0 0 0 0 0 0 0 0 0 0 0 0 0 0  
0 0 0 0 0 0 0 0 0 0 0 0 0 0 0 0 0 0 0 0 0 0 0 0 0 0 0 0 0  
9 0 0 0 0 0 0 0 0 0 0 0 0 0 0 0 0 0 0 0 0 0 0 0 0 0 8 0 0  
0 0 0 0 0 0 0 0 0 0 0 0 0 0 0 0 0 0 0 0 0 0 0 0 0 0 0  
M02255\_76\_000000000-ADUNE\_1\_1102\_14127\_12584 G---AA---TA-AG-CAC-----CGG-C-T-----A--A--C---T--AC-G-TGC-CA-----GC-A--G-C--CG-CG-----GT-A----AT-AC-GT--A-----G-GG-T-G-C-G-----A--G-CT-G-T-T-----  
-----AA---G-T-C-G-----G-A-A--G--TG--A-AA-TC--C-C-CG-G-G----CT-C-AA-----C-C-T-G-G-G-A--A-C---T-G--C-A---T-T-----T--GT-G-A---C-----T--G-G--CA--G-G-C---T-A-G-A-G-T--A---T-GG----CA-G-A-----G-G-G-G---GG-T-----AG--A--ATT----C-  
C-A-C-GT--GT-A-G-CA-GT--G---A--A-A---TG-C-GT-AG--AG-A-TG--T-G--G-A-G-G-A-AT-A-CC---GA--T--G--GC-GAA-G--G-C-A-----G--C-C-C-C---CTG--G--GC-C-A-----A-T---A-C-T--GA--CG-C-T-C--A-TG--C-A-CG-A--AA-G-C---G-TG--GG-G-  
-AG-C-A-AA-----CA--GG Bacteria(100);Proteobacteria(100);Betaproteobacteria(100);unclassified(100);unclassified(100);unclassified(100);unclassified(100);unclassified(100);unclassified(100);

Otu1414 0 0 0 0 0 0 0 0 0 0 0 0 0 0 0 0 0 0 0 0 0 0 0 0 0 0 0 0 0  
0 0 0 0 0 0 0 0 0 0 0 0 0 0 0 0 0 0 0 0 0 0 0 0 0 0 0 0 0  
6 0 0 0 0 0 0 0 0 0 0 0 0 0 0 0 0 0 14 0 0 0 0 0 0 0 0 0  
5 0 0 0 0 0 0 0 0 0 0 0 5 0 0 0 0 0 0 0 0 0 0 0 0 0 0  
M02255\_77\_000000000-ADUT3\_1\_1109\_12351\_10624 T---AC---GT-AG-GGG-----GCG-A-G-----C-G-T---T--AT-C-CGG-AT-----TC-A--T-T--GG-GC-----GT-A----AA-GC-GC-GC-----G-TA-G-G-C-G-----G--C-CC-G-G-C-----  
-----AG---G-C-A-G-----G-G-G--G--TC--A-AA-TG--G-C-GG-G-G----CT-C-AA-----C-C-C-C-G-T-C--C-----C-G--C-C---C-C-----C--TG-A-A---C-----C--G-C--CG--G-G-C---T-C-G-G-G-T--C---C-GG----TA-G-G-----G-G-A-G---GG-T-----GG--A--ACA---  
C-C-C-G-GT--GT-A-G-CG-GT--G---G--A-A---TG-C-GC-AG--AT-A-TC--G-G--G-T-G-G-A-AC-A-CC---GG--T--G--GC-GAA-G--GC--G-----G--C-C-C-T---CTG--G--GC-C-G-----A-G---A-C-C--GA--CG-C-T-G--A-GG--C-G-CG-A--AA-G-C---T-GG--  
GG-G--AG-C-G-AA-----CA--GG Bacteria(100);Actinobacteria(100);Actinobacteria(100);Coriobacteridae(100);Coriobacteriales(100);Coriobacterineae(100);Coriobacteriaceae(100);Collinsella(100);unclassified(100);



|                                                                                                                                                                                                                                                                                                                                                                                                      |    |   |     |   |   |   |   |   |   |   |   |   |   |   |   |    |   |   |   |   |   |   |   |   |   |   |     |
|------------------------------------------------------------------------------------------------------------------------------------------------------------------------------------------------------------------------------------------------------------------------------------------------------------------------------------------------------------------------------------------------------|----|---|-----|---|---|---|---|---|---|---|---|---|---|---|---|----|---|---|---|---|---|---|---|---|---|---|-----|
| Otu1415                                                                                                                                                                                                                                                                                                                                                                                              | 0  | 0 | 0   | 0 | 0 | 0 | 0 | 0 | 0 | 0 | 0 | 0 | 0 | 0 | 0 | 0  | 0 | 0 | 0 | 0 | 0 | 0 | 0 | 0 | 0 | 0 | 0   |
| 0                                                                                                                                                                                                                                                                                                                                                                                                    | 0  | 0 | 0   | 0 | 0 | 0 | 0 | 0 | 0 | 0 | 0 | 0 | 0 | 0 | 0 | 0  | 0 | 0 | 0 | 0 | 0 | 0 | 0 | 0 | 0 | 0 | 0   |
| 23                                                                                                                                                                                                                                                                                                                                                                                                   | 0  | 0 | 0   | 0 | 0 | 0 | 0 | 0 | 0 | 0 | 0 | 0 | 0 | 0 | 0 | 0  | 0 | 0 | 0 | 0 | 0 | 0 | 0 | 0 | 0 | 0 | 0   |
| 0                                                                                                                                                                                                                                                                                                                                                                                                    | 0  | 0 | 0   | 0 | 0 | 0 | 0 | 0 | 0 | 0 | 0 | 0 | 0 | 0 | 0 | 0  | 0 | 0 | 0 | 0 | 0 | 0 | 0 | 0 | 0 | 0 | 0   |
| M02255_77_000000000-ADUT3_1_1118_15907_22717 T---AC---GG-AG-GGA-----GCT-A-G-----C-G-T---T--GT-T-CGG-AA-----TT-A--C-T--GG-GC-----GT-A-----AA-GC-GT-AC-----G-TA-G-G-C-G-----G--C-TT-T-G-T-----                                                                                                                                                                                                         |    |   |     |   |   |   |   |   |   |   |   |   |   |   |   |    |   |   |   |   |   |   |   |   |   |   |     |
| -----AA---G-T-C-A-----G-A-G--G--TG--A-AA-GC--C-C-AC-G-A----CT-C-AA-----T-C-G-T-G-G-A-A-C---T-G-C-C---T-T-----T-GA-G-A---C-----T-G-C-TT--C-G-C---T-T-G-A-A-G--A---T-GG-----GA-G-A-----G-G-T-T---AG-T-----GG--A--ATT---C-                                                                                                                                                                              |    |   |     |   |   |   |   |   |   |   |   |   |   |   |   |    |   |   |   |   |   |   |   |   |   |   |     |
| C-G-A-GT--GT-A-G-AG-GT--G---A--A-A---TT-C-GT-AG--AT-A-TT--C-G--G-A-A-G-A-AC-A-CC---AG--T--G--GC-GAA-G--G-C-G-----G--C-T-A-A---CTG--G--AC-C-A-----T-T---C-T-T--GA--CG-C-T-G--A-GG--T-A-CG-A--AA-G-C---G-TG--GG-G-                                                                                                                                                                                     |    |   |     |   |   |   |   |   |   |   |   |   |   |   |   |    |   |   |   |   |   |   |   |   |   |   |     |
| -AG-C-A-AA-----CA--GG Bacteria(100);unclassified(100);unclassified(100);unclassified(100);unclassified(100);unclassified(100);unclassified(100);unclassified(100);unclassified(100);                                                                                                                                                                                                                 |    |   |     |   |   |   |   |   |   |   |   |   |   |   |   |    |   |   |   |   |   |   |   |   |   |   |     |
| Otu1416                                                                                                                                                                                                                                                                                                                                                                                              | 0  | 0 | 0   | 0 | 0 | 0 | 0 | 0 | 0 | 0 | 0 | 0 | 0 | 0 | 0 | 0  | 0 | 0 | 0 | 0 | 0 | 0 | 0 | 0 | 0 | 0 | 0   |
| 0                                                                                                                                                                                                                                                                                                                                                                                                    | 0  | 0 | 0   | 0 | 0 | 0 | 0 | 0 | 0 | 0 | 0 | 0 | 0 | 0 | 0 | 0  | 0 | 0 | 0 | 0 | 0 | 0 | 0 | 0 | 0 | 0 | 0   |
| 34                                                                                                                                                                                                                                                                                                                                                                                                   | 0  | 0 | 0   | 0 | 0 | 0 | 0 | 0 | 0 | 0 | 0 | 0 | 0 | 0 | 0 | 0  | 0 | 0 | 0 | 0 | 0 | 0 | 0 | 0 | 0 | 0 | 0   |
| 0                                                                                                                                                                                                                                                                                                                                                                                                    | 0  | 0 | 0   | 0 | 0 | 0 | 0 | 0 | 0 | 0 | 0 | 0 | 0 | 0 | 0 | 0  | 0 | 0 | 0 | 0 | 0 | 0 | 0 | 0 | 0 | 0 | 0   |
| M02255_77_000000000-ADUT3_1_1117_7589_17799 T---AC---GG-AG-GAT-----GCA-A-G-----C-G-T---T--AT-C-CGG-AA-----TG-A--T-T--GG-GC-----GT-A-----AA-GC-GT-CC-----G-CA-G-G-T-G-----G--C-AA-T-G-T-----AA-                                                                                                                                                                                                       |    |   |     |   |   |   |   |   |   |   |   |   |   |   |   |    |   |   |   |   |   |   |   |   |   |   |     |
| ---G-T-C-T-----G-C-T-G--TC--A-AA-GC--G-T-CT-G-G----CT-C-AA-----C-C-A-G-A-T-A--A-A---G-G--C-A--G-T-----G--GA-A-A---C-----T-A-C--AT--A-G-C---T-A-G-A-G-T-A---A-GG-----TA-G-G-----G-G-T-A--GA-G-----GG--A--ATT---C-C-T-G-                                                                                                                                                                               |    |   |     |   |   |   |   |   |   |   |   |   |   |   |   |    |   |   |   |   |   |   |   |   |   |   |     |
| GT--GT-A-G-CG-GT--G---A--A-A---TG-C-GT-AG--AG-A-TC--A-G--G-A-A-G-A-AC-A-CC---GG--T--G--GC-GAA-A--G-C-G-----C--T-C-T-G---CTG--G--AC-C-T-----T-A---A-C-T--GA--CA-C-T-G--A-GG--G-A-CG-A--AA-G-C---T-AG--GG-G--AG-                                                                                                                                                                                       |    |   |     |   |   |   |   |   |   |   |   |   |   |   |   |    |   |   |   |   |   |   |   |   |   |   |     |
| C-G-AA-----TG--GG Bacteria(100);Cyanobacteria(100);unclassified(100);unclassified(100);unclassified(100);unclassified(100);unclassified(100);unclassified(100);unclassified(100);                                                                                                                                                                                                                    |    |   |     |   |   |   |   |   |   |   |   |   |   |   |   |    |   |   |   |   |   |   |   |   |   |   |     |
| Otu1417                                                                                                                                                                                                                                                                                                                                                                                              | 0  | 0 | 0   | 0 | 0 | 0 | 0 | 0 | 0 | 0 | 0 | 0 | 0 | 0 | 0 | 0  | 0 | 0 | 0 | 0 | 0 | 0 | 0 | 0 | 0 | 0 | 0   |
| 0                                                                                                                                                                                                                                                                                                                                                                                                    | 0  | 0 | 0   | 0 | 0 | 0 | 0 | 0 | 0 | 0 | 0 | 0 | 0 | 0 | 0 | 0  | 0 | 0 | 0 | 0 | 0 | 0 | 0 | 0 | 0 | 0 | 0   |
| 5                                                                                                                                                                                                                                                                                                                                                                                                    | 48 | 0 | 120 | 0 | 2 | 0 | 7 | 5 | 0 | 0 | 0 | 0 | 0 | 0 | 9 | 17 | 0 | 0 | 0 | 0 | 0 | 0 | 0 | 0 | 0 | 0 | 0   |
| 0                                                                                                                                                                                                                                                                                                                                                                                                    | 0  | 0 | 0   | 0 | 0 | 0 | 0 | 0 | 0 | 0 | 0 | 0 | 0 | 0 | 0 | 0  | 0 | 0 | 0 | 0 | 0 | 0 | 0 | 0 | 0 | 0 | 0   |
| M02255_77_000000000-ADUT3_1_1111_22116_19660 T---AC---GG-AG-GAT-----GCA-A-G-----C-G-T---T--AT-C-CGG-AA-----TG-A--T-T--GG-GC-----GT-A-----AA-GC-GT-CC-----G-CA-G-G-T-G-----G--C-TT-A-T-C-----                                                                                                                                                                                                         |    |   |     |   |   |   |   |   |   |   |   |   |   |   |   |    |   |   |   |   |   |   |   |   |   |   |     |
| -----AA---G-T-C-G-----A-T-T--G--TC--A-AA-GG--T-C-CT-G-G----CT-C-AA-----C-T-G-G-G-A-A--C-A---G-G--C-A--G-T-----G--GA-A-A---C-----T-G-A--AA--A-G-C---T-A-G-A-G-T-G---C-GG-----TA-G-G-----G-G-T-A--GA-G-----GG--A--ATT---C-C-T-G-                                                                                                                                                                       |    |   |     |   |   |   |   |   |   |   |   |   |   |   |   |    |   |   |   |   |   |   |   |   |   |   |     |
| C-C-C-G-GT--GT-A-G-CG-GT--G---A--A-A---TG-C-GT-AG--AG-A-TC--G-G--G-A-A-G-A-AC-A-CC---AG--T--G--GC-GAA-A--G-C-G-----C--T-C-T-A---CTA--G--GC-C-T-----G-C---A-C-T--GA--CA-C-T-C--A-TG--G-A-CG-A--AA-G-C---T-AG--GG-G--AG-                                                                                                                                                                               |    |   |     |   |   |   |   |   |   |   |   |   |   |   |   |    |   |   |   |   |   |   |   |   |   |   |     |
| G--AG-C-G-AA-----TG--GG Bacteria(100);Cyanobacteria(100);SubsectionII(100);SubgroupII(100);Chroococcidiopsis(100);unclassified(100);unclassified(100);unclassified(100);unclassified(100);                                                                                                                                                                                                           |    |   |     |   |   |   |   |   |   |   |   |   |   |   |   |    |   |   |   |   |   |   |   |   |   |   |     |
| Otu1418                                                                                                                                                                                                                                                                                                                                                                                              | 0  | 0 | 0   | 0 | 0 | 0 | 0 | 0 | 0 | 0 | 0 | 0 | 0 | 0 | 0 | 0  | 0 | 0 | 0 | 0 | 0 | 0 | 0 | 0 | 0 | 0 | 0   |
| 0                                                                                                                                                                                                                                                                                                                                                                                                    | 0  | 0 | 0   | 0 | 0 | 0 | 0 | 0 | 0 | 0 | 0 | 0 | 0 | 0 | 0 | 0  | 0 | 0 | 0 | 0 | 0 | 0 | 0 | 0 | 0 | 0 | 0   |
| 10                                                                                                                                                                                                                                                                                                                                                                                                   | 0  | 0 | 0   | 0 | 0 | 0 | 0 | 0 | 0 | 0 | 0 | 0 | 0 | 0 | 0 | 0  | 0 | 0 | 0 | 0 | 0 | 0 | 0 | 0 | 0 | 0 | 0   |
| 0                                                                                                                                                                                                                                                                                                                                                                                                    | 0  | 0 | 0   | 0 | 0 | 0 | 0 | 0 | 0 | 0 | 0 | 0 | 0 | 0 | 0 | 0  | 0 | 0 | 0 | 0 | 0 | 0 | 0 | 0 | 0 | 0 | 0   |
| M02255_77_000000000-ADUT3_1_1110_17261_4206 T---AC---AG-AG-GGG-----GCA-A-G-----C-G-T---T--GT-C-CGG-AC-----TT-A--C-T--GG-GC-----GT-A-----CA-GC-GC-GC-----G-CA-G-G-C-G-----G--C-CG-T-G-T-----                                                                                                                                                                                                          |    |   |     |   |   |   |   |   |   |   |   |   |   |   |   |    |   |   |   |   |   |   |   |   |   |   |     |
| AT----G-T-G-C-----T-G-G--G--TG--A-CA-TC--C-T-CC-C-G----CT-C-AA-----C-G-G-G-A-G-G--C-G---G-C--C-C---C-G-----G--TA-G-A---C-----A--G-C--AG--G-G-C---T-G-G-A-G-G--C---A-GG-----GA-G-A-----G-G-G-A---TG-T-----GG--A--ATG---C-C-                                                                                                                                                                           |    |   |     |   |   |   |   |   |   |   |   |   |   |   |   |    |   |   |   |   |   |   |   |   |   |   |     |
| C-G-GT--GG-A-G-CG-GT--G---A--A-A---TG-C-GT-AG--AG-A-TC--G-G--G-C-G-G-A-AC-A-CC---AG--C--G--GC-GAA-G--G-C-G-----G--C-A-T-C---CTG--G--CC-C-T-----G-A---C-C-T--GA--CG-C-T-G--A-GG--C-G-CG-A--TA-G-C---G-TG--GG-G--AG-                                                                                                                                                                                   |    |   |     |   |   |   |   |   |   |   |   |   |   |   |   |    |   |   |   |   |   |   |   |   |   |   |     |
| AG-C-A-AA-----CG--GG Bacteria(100);unclassified(100);unclassified(100);unclassified(100);unclassified(100);unclassified(100);unclassified(100);unclassified(100);unclassified(100);                                                                                                                                                                                                                  |    |   |     |   |   |   |   |   |   |   |   |   |   |   |   |    |   |   |   |   |   |   |   |   |   |   |     |
| Otu1419                                                                                                                                                                                                                                                                                                                                                                                              | 0  | 0 | 0   | 0 | 0 | 0 | 0 | 0 | 0 | 0 | 0 | 0 | 0 | 0 | 0 | 0  | 0 | 0 | 0 | 0 | 0 | 0 | 0 | 0 | 0 | 0 | 0   |
| 0                                                                                                                                                                                                                                                                                                                                                                                                    | 0  | 0 | 0   | 0 | 0 | 0 | 0 | 0 | 0 | 0 | 0 | 0 | 0 | 0 | 0 | 0  | 0 | 0 | 0 | 0 | 0 | 0 | 0 | 0 | 0 | 0 | 213 |
| 0                                                                                                                                                                                                                                                                                                                                                                                                    | 0  | 0 | 0   | 0 | 0 | 0 | 0 | 0 | 0 | 0 | 0 | 0 | 0 | 0 | 0 | 0  | 0 | 0 | 0 | 0 | 0 | 0 | 0 | 0 | 0 | 0 | 0   |
| 0                                                                                                                                                                                                                                                                                                                                                                                                    | 0  | 0 | 0   | 0 | 0 | 0 | 0 | 0 | 0 | 0 | 0 | 0 | 0 | 0 | 0 | 0  | 0 | 0 | 0 | 0 | 0 | 0 | 0 | 0 | 0 | 0 | 0   |
| M02255_77_000000000-ADUT3_1_1115_26670_17085 G----AC---AG-AG-GCC-----TCA-A-G-----C-G-T---T--AG-G-CGG-AA-----TC-A--C-T--GG-GC-----TT-A-----AA-GC-GT-GT-----G-TA-G-G-C-G-----G--A-TC-G-T-T-----                                                                                                                                                                                                        |    |   |     |   |   |   |   |   |   |   |   |   |   |   |   |    |   |   |   |   |   |   |   |   |   |   |     |
| -----AA---G-T-G-T-----C-T-T--G--TG--A-AA-TC--C-C-AC-G-G----CT-C-AA-----C-C-G-T-G-G-A--A-C---G-G--C-T--G--G-----G--CA-T-A---C-----T-G-G--CG--A-T-C---T-T-G-A-G-C--A---G-CC-----TA-G-G-----G-G-C-G---AC-C-----GG--A--ACA---                                                                                                                                                                            |    |   |     |   |   |   |   |   |   |   |   |   |   |   |   |    |   |   |   |   |   |   |   |   |   |   |     |
| A-A-C-G-GT--GG-A-G-CG-GT--G---A--A-A---TG-C-GT-AG--AT-A-TC--G-T--T-T-G-G-A-AC-G-CC---AA--T--G--GT-GAA-A--A-C--A-----G--G-T-C-G---CTG--G--GG-G-C-----T-C---G-C-T--GA--CG-C-T-G--A-GA--C-A-CG-A--AA-G-C---C-AG--GG-G--AG-C-A-AA-----CG--GG Bacteria(100);Planctomycetes(100);Phycisphaerae(100);WD2101(100);unclassified(100);unclassified(100);unclassified(100);unclassified(100);unclassified(100); |    |   |     |   |   |   |   |   |   |   |   |   |   |   |   |    |   |   |   |   |   |   |   |   |   |   |     |



|                                                                                                                                                                                                                            |   |   |   |   |   |   |   |   |   |   |    |   |   |   |   |   |   |   |   |   |   |   |   |   |   |     |   |
|----------------------------------------------------------------------------------------------------------------------------------------------------------------------------------------------------------------------------|---|---|---|---|---|---|---|---|---|---|----|---|---|---|---|---|---|---|---|---|---|---|---|---|---|-----|---|
| Otu1420                                                                                                                                                                                                                    | 0 | 0 | 0 | 0 | 0 | 0 | 0 | 0 | 0 | 0 | 0  | 0 | 0 | 0 | 0 | 0 | 0 | 0 | 0 | 0 | 0 | 0 | 0 | 0 | 0 | 0   | 0 |
|                                                                                                                                                                                                                            | 0 | 0 | 0 | 0 | 0 | 0 | 0 | 0 | 0 | 0 | 0  | 0 | 0 | 0 | 0 | 0 | 0 | 0 | 0 | 0 | 0 | 0 | 0 | 0 | 0 | 19  |   |
|                                                                                                                                                                                                                            | 0 | 0 | 0 | 0 | 0 | 0 | 0 | 0 | 0 | 0 | 0  | 0 | 0 | 0 | 0 | 0 | 0 | 0 | 0 | 0 | 0 | 0 | 0 | 0 | 0 | 0   |   |
|                                                                                                                                                                                                                            | 0 | 0 | 0 | 0 | 0 | 0 | 0 | 0 | 0 | 0 | 0  | 0 | 0 | 0 | 0 | 0 | 0 | 0 | 0 | 0 | 0 | 0 | 0 | 0 | 0 |     |   |
| M02255_77_000000000-ADUT3_1_1109_13524_17850 G---AC---AG-AG-GCC-----CCA-A-G-----C-G-T--T--AG-G-CGG-AA-----TC-A--C-T--GG-GC-----TT-A----AA-GC-GT-GT-----G-TA-G-G-C-G-----G--A-CG-C-C-T-----                                 |   |   |   |   |   |   |   |   |   |   |    |   |   |   |   |   |   |   |   |   |   |   |   |   |   |     |   |
| -----AA---G-T-G-T-----C-T-T--G--TG--A-AA-TC--C-C-AC-G-G----CT-C-AC-----C-C-G-T-G-G-A--A-C---T-G--C-T--G-G-----G--CA-T-A--C-----T--G-G--GC-G-T-C---T-T-G-G-G-C--C---A-AC-----TA-G-G-----G-G-C-A--GC-C-----GG--A--ACA---A-   |   |   |   |   |   |   |   |   |   |   |    |   |   |   |   |   |   |   |   |   |   |   |   |   |   |     |   |
| G-C-G-GT--GG-A-G-CG-GT--G---A--A---TG-C-GT-AG--AT-A-TC--G-C--T-T-G-G-A-AC-G-CC--GA--A--G--GT-GAA-A--A-C--A-----G--G-C-T-G--CTG--G--GG-T-T-----G-C---G-C-C--GA--CG-C-T-G--A-GA--C-A-CG-A--AA-G-C---C-AG--GG-                |   |   |   |   |   |   |   |   |   |   |    |   |   |   |   |   |   |   |   |   |   |   |   |   |   |     |   |
| G--AG-C-A-AA-----CG--GG Bacteria(100);Planctomycetes(100);Phycisphaerae(100);WD2101(100);unclassified(100);unclassified(100);unclassified(100);unclassified(100);unclassified(100);                                        |   |   |   |   |   |   |   |   |   |   |    |   |   |   |   |   |   |   |   |   |   |   |   |   |   |     |   |
| Otu1421                                                                                                                                                                                                                    | 0 | 0 | 0 | 0 | 0 | 0 | 0 | 0 | 0 | 0 | 0  | 0 | 0 | 0 | 0 | 0 | 0 | 0 | 0 | 0 | 0 | 0 | 0 | 0 | 0 | 0   |   |
|                                                                                                                                                                                                                            | 0 | 0 | 0 | 0 | 0 | 0 | 0 | 0 | 0 | 0 | 0  | 0 | 0 | 0 | 0 | 0 | 0 | 0 | 0 | 0 | 0 | 0 | 0 | 0 | 0 | 154 |   |
|                                                                                                                                                                                                                            | 0 | 0 | 0 | 0 | 0 | 0 | 0 | 0 | 0 | 0 | 0  | 0 | 0 | 0 | 0 | 0 | 0 | 0 | 0 | 0 | 0 | 0 | 0 | 0 | 0 | 0   |   |
|                                                                                                                                                                                                                            | 0 | 0 | 0 | 0 | 0 | 0 | 0 | 0 | 0 | 0 | 20 | 0 | 0 | 0 | 0 | 0 | 0 | 0 | 0 | 0 | 0 | 0 | 0 | 0 | 0 |     |   |
| M02255_77_000000000-ADUT3_1_1105_7747_7291 G---AC---GT-AG-GGG-----GCG-A-G-----C-G-T--T--GT-C-CGG-AA-----TT-A-T-T--GG-GC-----GT-A---AA-GG-GC-TC-----C-TA-G-G-C-G-----G--T-TC-A-G-T-----                                     |   |   |   |   |   |   |   |   |   |   |    |   |   |   |   |   |   |   |   |   |   |   |   |   |   |     |   |
| AAA---G-T-C-G-----A-C-T--G--TG--A-AA-AT--C-C-AA-G-G----CT-C-AA-----C-C-T-T-G-G-G-A-----C-G-CC-A--G--T-----C--GA-T-A--C-----T--G-C--TG-TG-A-C---T-C-G-A-G-T--T---C-GG---TA-G-A-----G-G-A-G---TG-T-----GG--A--ATT---C-C-T-   |   |   |   |   |   |   |   |   |   |   |    |   |   |   |   |   |   |   |   |   |   |   |   |   |   |     |   |
| G-GT--GT-A-G-CG-GT--G---A--A---TG-C-GC-AG--AT-A-TC--A-G--G-A-G-G-A-AC-A-CC--AA--C--G--GC-GAA-G--G-C--A-----G--C-A-C-T--CTG--G--GC-C-G-----A-T---A-C-T--GA--CG-C-T-G--A-AG--A-G-CG-A--AA-G-C---G-TG--GG-G--                 |   |   |   |   |   |   |   |   |   |   |    |   |   |   |   |   |   |   |   |   |   |   |   |   |   |     |   |
| AG-C-A-AA-----CA--GG Bacteria(100);Actinobacteria(100);Actinobacteria(100);unclassified(100);unclassified(100);unclassified(100);unclassified(100);unclassified(100);unclassified(100);                                    |   |   |   |   |   |   |   |   |   |   |    |   |   |   |   |   |   |   |   |   |   |   |   |   |   |     |   |
| Otu1422                                                                                                                                                                                                                    | 0 | 0 | 0 | 0 | 0 | 0 | 0 | 0 | 0 | 0 | 0  | 0 | 0 | 0 | 0 | 0 | 0 | 0 | 0 | 0 | 0 | 0 | 0 | 0 | 0 | 0   |   |
|                                                                                                                                                                                                                            | 0 | 0 | 0 | 0 | 0 | 0 | 0 | 0 | 0 | 0 | 0  | 0 | 0 | 0 | 0 | 0 | 0 | 0 | 0 | 0 | 0 | 0 | 0 | 0 | 0 | 46  |   |
|                                                                                                                                                                                                                            | 0 | 0 | 0 | 0 | 0 | 0 | 0 | 0 | 0 | 0 | 0  | 0 | 0 | 0 | 0 | 0 | 0 | 0 | 0 | 0 | 0 | 0 | 0 | 0 | 0 | 0   |   |
|                                                                                                                                                                                                                            | 0 | 0 | 0 | 0 | 0 | 0 | 0 | 0 | 0 | 0 | 0  | 0 | 0 | 0 | 0 | 0 | 0 | 0 | 0 | 0 | 0 | 0 | 0 | 0 | 0 |     |   |
| M02255_76_000000000-ADUNE_1_1103_20755_8199 C---TA--AC-TC-TGT-----GCC-A-G-----C----A--G--CC-G-CGG-TA-----AT-A--C-A--GA-GG-----GT--G---CA--A-GC-GT-----TG-T-T-C-G-----G--A-CT-G-C-T-----AA----                              |   |   |   |   |   |   |   |   |   |   |    |   |   |   |   |   |   |   |   |   |   |   |   |   |   |     |   |
| G-T-C-A-----T-G-T--G--TG--A-AA-TC--C-C-TC-G-G----CT-T-AA-----C-C-G-A-G-G-A--A-C---G-A--C-G--C--A-----T--GA-A-A--C-----T--G-G--CA--A-G-C---T-A-G-A-G-T--A--C-CA-----AA-G-A-----G-G-G-G---GG-T-----GG--A--ATT---C-C-C-G-     |   |   |   |   |   |   |   |   |   |   |    |   |   |   |   |   |   |   |   |   |   |   |   |   |   |     |   |
| GT--GT-A-G-CG-GT--G---A--A---TG-C-GT-AG--AT-A-TC--G-G--G-A-G-G-A-AC-A-CC--GG--T--G--GC-GAA-G--G-C--G-----G--C-C-C-C---CTG--G--TT-G-G-----A-T---A-C-T--GA--CG-C-T-G--A-GA--C-G-CG-A--AA-G-C---G-TG--GG-G--AG-               |   |   |   |   |   |   |   |   |   |   |    |   |   |   |   |   |   |   |   |   |   |   |   |   |   |     |   |
| C-A-AA-----CA--GG Bacteria(100);Proteobacteria(100);Deltaproteobacteria(100);GR-WP33-30(100);uncultured(100);unclassified(100);unclassified(100);unclassified(100);unclassified(100);                                      |   |   |   |   |   |   |   |   |   |   |    |   |   |   |   |   |   |   |   |   |   |   |   |   |   |     |   |
| Otu1423                                                                                                                                                                                                                    | 0 | 0 | 0 | 0 | 0 | 0 | 0 | 0 | 0 | 0 | 0  | 0 | 0 | 0 | 0 | 0 | 0 | 0 | 0 | 0 | 0 | 0 | 0 | 0 | 0 | 0   |   |
|                                                                                                                                                                                                                            | 0 | 0 | 0 | 0 | 0 | 0 | 0 | 0 | 0 | 0 | 0  | 0 | 0 | 0 | 0 | 0 | 0 | 0 | 0 | 0 | 0 | 0 | 0 | 0 | 0 | 16  |   |
|                                                                                                                                                                                                                            | 0 | 0 | 0 | 0 | 0 | 0 | 0 | 0 | 0 | 0 | 0  | 0 | 0 | 0 | 0 | 0 | 0 | 0 | 0 | 0 | 0 | 0 | 0 | 0 | 0 | 0   |   |
|                                                                                                                                                                                                                            | 0 | 0 | 0 | 0 | 0 | 0 | 0 | 0 | 0 | 0 | 0  | 0 | 0 | 0 | 0 | 0 | 0 | 0 | 0 | 0 | 0 | 0 | 0 | 0 | 0 |     |   |
| M02255_76_000000000-ADUNE_1_1103_24980_5045 .....AC---T-AC-GT-----GCC-A-G-----C--A--G---C--CT-C-GGT-AA-----TA-C--G-T--AG-GT-----GG--C---AA-GC-G--TT-----G---T-C-C-G-----G--A-TT-C-T-T-----AA---G-                          |   |   |   |   |   |   |   |   |   |   |    |   |   |   |   |   |   |   |   |   |   |   |   |   |   |     |   |
| T-C-T-----G-A-T--G--TG--A-AA-TC--T-C-GG-G-G----CT-C-AA-----C-C-C-C-G-A-G--C-----G-GC-C-A---T--T-----G--GA-A-A--C-----T--G-G--GG--A-G-C---T-T-G-A-G-T--G---C-AG-----AA-G-A-----G-G-A-G---AG-T-----GG--A--ATT---C-C-A-C-GT-- |   |   |   |   |   |   |   |   |   |   |    |   |   |   |   |   |   |   |   |   |   |   |   |   |   |     |   |
| GT-A-G-CG-GT--G---A--A---TG-C-GT-AG--AG-A-TG--T-G--G-A-G-G-A-AC-A-CC--AG--T--G--GC-GAA-G--G-C--G-----A--C-T-C-T---CTG--G--TC-T-G-----T-A---A-C-T--GA--CG-C-T-G--A-GG--C-G-CG-A--AA-G-C---G-TG--GG-G--AG-C-A-               |   |   |   |   |   |   |   |   |   |   |    |   |   |   |   |   |   |   |   |   |   |   |   |   |   |     |   |
| AA-----CA--GG Bacteria(100);Firmicutes(100);Bacilli(100);unclassified(100);unclassified(100);unclassified(100);unclassified(100);unclassified(100);unclassified(100);                                                      |   |   |   |   |   |   |   |   |   |   |    |   |   |   |   |   |   |   |   |   |   |   |   |   |   |     |   |
| Otu1424                                                                                                                                                                                                                    | 0 | 0 | 0 | 0 | 0 | 0 | 0 | 0 | 0 | 0 | 0  | 0 | 0 | 0 | 0 | 0 | 0 | 0 | 0 | 0 | 0 | 0 | 0 | 0 | 0 | 0   |   |
|                                                                                                                                                                                                                            | 0 | 0 | 0 | 0 | 0 | 0 | 0 | 0 | 0 | 0 | 0  | 0 | 0 | 0 | 0 | 0 | 0 | 0 | 0 | 0 | 0 | 0 | 0 | 0 | 2 | 53  |   |
|                                                                                                                                                                                                                            | 0 | 0 | 0 | 0 | 0 | 0 | 0 | 0 | 0 | 0 | 0  | 0 | 0 | 0 | 0 | 0 | 0 | 0 | 0 | 0 | 0 | 0 | 0 | 0 | 0 | 0   |   |
|                                                                                                                                                                                                                            | 0 | 0 | 0 | 0 | 0 | 0 | 0 | 0 | 0 | 0 | 0  | 0 | 0 | 0 | 0 | 0 | 0 | 0 | 0 | 0 | 0 | 0 | 0 | 0 | 0 |     |   |
| M02255_77_000000000-ADUT3_1_1114_25083_3995 G---AC---AG-AG-GTG-----CCA-A-G-----C--G--T--T--AG-G-CGG-AA-----TC-A--C-T--GG-GC-----TT-A----AA-GC-GT-GT-----G-TA-G-G-C-G-----G--A-CC-T-C-T-----AA--                            |   |   |   |   |   |   |   |   |   |   |    |   |   |   |   |   |   |   |   |   |   |   |   |   |   |     |   |
| ---G-T-A-C-----C-T-T--G--TG--A-AA-TC--C-C-AC-G-G----CT-C-AA-----C-C-G-T-G-G-A--A-C---T-G--C-T--C--G-----G--TA-T-A--C-----T--G-G--GG--G-T-C---T-T-G-A-G-C--C---A-CT-----TA-G-G-----G-G-T-C---GT-C-----GG--A--ACA---A-G-C-G- |   |   |   |   |   |   |   |   |   |   |    |   |   |   |   |   |   |   |   |   |   |   |   |   |   |     |   |
| GT--GG-A-G-CG-GT--G---A--A---TG-C-GT-AG--AT-A-TC--G-C--T-T-G-G-A-AC-G-CC--AA--C--G--GT-GAA-A--A-C--A-----G--A-C-G-A---CTG--G--GA-G-T-----G-C---G-C-T--GA--CG-C-T-G--A-GA--C-A-CG-A--AA-G-C---C-AG--GG-G--AG-               |   |   |   |   |   |   |   |   |   |   |    |   |   |   |   |   |   |   |   |   |   |   |   |   |   |     |   |
| C-G-AA-----CG--GG Bacteria(100);Planctomycetes(100);Phycisphaerae(100);WD2101(100);unclassified(100);unclassified(100);unclassified(100);unclassified(100);unclassified(100);                                              |   |   |   |   |   |   |   |   |   |   |    |   |   |   |   |   |   |   |   |   |   |   |   |   |   |     |   |



|         |                                                                                                                                                                                                                           |   |   |   |   |   |   |   |   |   |   |   |   |   |    |   |   |     |    |   |   |   |   |   |   |    |   |  |
|---------|---------------------------------------------------------------------------------------------------------------------------------------------------------------------------------------------------------------------------|---|---|---|---|---|---|---|---|---|---|---|---|---|----|---|---|-----|----|---|---|---|---|---|---|----|---|--|
| Otu1425 | 0                                                                                                                                                                                                                         | 0 | 0 | 0 | 0 | 0 | 0 | 0 | 0 | 0 | 0 | 0 | 0 | 0 | 0  | 0 | 0 | 0   | 0  | 0 | 0 | 0 | 0 | 0 | 0 | 0  | 0 |  |
|         | 0                                                                                                                                                                                                                         | 0 | 0 | 0 | 0 | 0 | 0 | 0 | 0 | 0 | 0 | 0 | 0 | 0 | 0  | 0 | 0 | 0   | 0  | 0 | 0 | 0 | 0 | 0 | 0 | 9  | 0 |  |
|         | 0                                                                                                                                                                                                                         | 0 | 0 | 0 | 0 | 0 | 0 | 0 | 0 | 0 | 0 | 0 | 0 | 0 | 0  | 0 | 0 | 0   | 0  | 0 | 0 | 0 | 0 | 0 | 0 | 0  | 0 |  |
|         | 0                                                                                                                                                                                                                         | 0 | 0 | 0 | 0 | 0 | 0 | 0 | 0 | 0 | 0 | 0 | 0 | 0 | 0  | 0 | 0 | 0   | 0  | 0 | 0 | 0 | 0 | 0 | 0 |    |   |  |
|         | M02255_76_000000000-ADUNE_1_1118_13857_14464.....AC---T-AC-GTG-----CCA-G-C-----A-G--C---C--G--C-GGT-AA-----TA-C--G-T--AG-GT-----GG--C-----AA-AC-G--TT-----G---T-C-C-G-----G--T-TT-A-T-T-----                              |   |   |   |   |   |   |   |   |   |   |   |   |   |    |   |   |     |    |   |   |   |   |   |   |    |   |  |
|         | AA---G-T-C-T-----G-A-T--G--TG--A-AAG-C--C-T-TC-G-G----CT-T-AA-----C-C-G-G-A-G-A--A-G---T-G--C-A--T--C-----G--GA-A-A--C-----T--G-A--TA--G-A-C---T-T-G-A-G-T--G---C-AG-----AA-A-A-----G-G-A-T--AG-T-----GG--A--ACT---T-C-A- |   |   |   |   |   |   |   |   |   |   |   |   |   |    |   |   |     |    |   |   |   |   |   |   |    |   |  |
|         | T-GT--GT-A-G-CG-GT--G---A--A-A---TG-C-GT-AG--AT-A-TA--T-G--A-A-G-G-A-AC-A-CC---AG--T--G--GC-GAA-G--G-C-G-----G--C-T-A-T---CTG--G--TC-T-G-----T-A--A-C-T--GA--CG-C-T-G--A-GG--C-T-CG-A--AA-G-C---A-TG--GG-T--AG-           |   |   |   |   |   |   |   |   |   |   |   |   |   |    |   |   |     |    |   |   |   |   |   |   |    |   |  |
|         | C-A-AA-----CA--GGBacteria(100);Firmicutes(100);Bacilli(100);Lactobacillales(100);Lactobacillaceae(100);Lactobacillus(100);unclassified(100);unclassified(100);unclassified(100);                                          |   |   |   |   |   |   |   |   |   |   |   |   |   |    |   |   |     |    |   |   |   |   |   |   |    |   |  |
| Otu1426 | 0                                                                                                                                                                                                                         | 0 | 0 | 0 | 0 | 0 | 0 | 0 | 0 | 0 | 0 | 0 | 0 | 0 | 0  | 0 | 0 | 0   | 0  | 0 | 0 | 0 | 0 | 0 | 0 | 0  | 0 |  |
|         | 0                                                                                                                                                                                                                         | 0 | 0 | 0 | 0 | 0 | 0 | 0 | 0 | 0 | 0 | 0 | 0 | 0 | 0  | 0 | 0 | 0   | 0  | 0 | 0 | 0 | 0 | 0 | 0 | 6  | 0 |  |
|         | 0                                                                                                                                                                                                                         | 0 | 0 | 0 | 0 | 0 | 0 | 0 | 0 | 0 | 0 | 0 | 0 | 0 | 0  | 0 | 0 | 0   | 0  | 0 | 0 | 0 | 0 | 0 | 0 | 0  | 0 |  |
|         | 0                                                                                                                                                                                                                         | 0 | 0 | 0 | 0 | 0 | 0 | 0 | 0 | 0 | 0 | 0 | 0 | 0 | 0  | 0 | 0 | 0   | 0  | 0 | 0 | 0 | 0 | 0 | 0 |    |   |  |
|         | M02255_77_000000000-ADUT3_1_2103_21061_20643T---AC--GT-AG-GTG-----GCT-A-G-----C--G--T---T--GT-C-CGG-AT-----TT-A--C-T--GG-GC-----GT--A---AA-GA-GC-GC-----G-CA-G-G-C-G-----G--T-CG-T-T-C-----                               |   |   |   |   |   |   |   |   |   |   |   |   |   |    |   |   |     |    |   |   |   |   |   |   |    |   |  |
|         | ----AA---G-T-C-G-----A-G-T--G--TG--A-AA-GC--C-C-CC-G-G----CT-C-AA-----C-T-G-G-G-G-A--G-G---G-T--C-A--C--T-----C--GA-T-A--C-----T--G-A--TC--G-A-C---T-T-G-A-A-G--G---C-GG---GA-G-A-----G-G-G-A--AG-C-----GG--A--ATT---     |   |   |   |   |   |   |   |   |   |   |   |   |   |    |   |   |     |    |   |   |   |   |   |   |    |   |  |
|         | C-C-C-G-GT--GT-A-G-TG-GT--G---A--A-A---TG-C-GT-AG--AT-A-TC--G-G--G-A-G-G-A-AC-A-CC---AG--T--G--GC-GAA-G--G-C-G-----G--C-T-T-T---CTG--G--CC-C-G-----T-T---C-T-T--GA--CG-C-T-G--A-GG--C-G-CG-A--AA-G-C---T-AG--GG-          |   |   |   |   |   |   |   |   |   |   |   |   |   |    |   |   |     |    |   |   |   |   |   |   |    |   |  |
|         | T--AG-C-A-AA-----CG--GGBacteria(100);Chloroflexi(100);KD4-96(100);unclassified(100);unclassified(100);unclassified(100);unclassified(100);unclassified(100);unclassified(100);                                            |   |   |   |   |   |   |   |   |   |   |   |   |   |    |   |   |     |    |   |   |   |   |   |   |    |   |  |
| Otu1427 | 0                                                                                                                                                                                                                         | 0 | 0 | 0 | 0 | 0 | 0 | 0 | 0 | 0 | 0 | 0 | 0 | 0 | 0  | 0 | 0 | 0   | 0  | 0 | 0 | 0 | 0 | 0 | 0 | 0  | 0 |  |
|         | 0                                                                                                                                                                                                                         | 0 | 0 | 0 | 0 | 0 | 0 | 0 | 0 | 0 | 0 | 0 | 0 | 0 | 0  | 0 | 0 | 0   | 0  | 0 | 0 | 0 | 0 | 0 | 0 | 24 | 0 |  |
|         | 0                                                                                                                                                                                                                         | 0 | 0 | 0 | 0 | 0 | 0 | 0 | 0 | 0 | 0 | 0 | 0 | 0 | 0  | 0 | 0 | 0   | 0  | 0 | 0 | 0 | 0 | 0 | 0 | 0  | 0 |  |
|         | 0                                                                                                                                                                                                                         | 0 | 0 | 0 | 0 | 0 | 0 | 0 | 0 | 0 | 0 | 0 | 0 | 0 | 0  | 0 | 0 | 0   | 0  | 0 | 0 | 0 | 0 | 0 | 0 |    |   |  |
|         | M02255_77_000000000-ADUT3_1_1105_5010_19515T---AC--GT-AG-GGG-----GCG-A-G-----C--G--T---T--GT-C-CGG-AG-----TT-A--C-T--GG-GC-----GT--A---AA-GC-GC-AC-----G-CA-G-G-C-G-----G--T-GT-G-C-C-----                                |   |   |   |   |   |   |   |   |   |   |   |   |   |    |   |   |     |    |   |   |   |   |   |   |    |   |  |
|         | AA---G-T-T-T-----G-C-A--G--TG--A-CA-GT--T-C-CC-G-G----CT-T-AA-----C-T-G-G-G-G-A--A-G---G-A--C-T--G--T-----G--AA-A-A--C-----T--G-G--TA--C-A-C---T-T-G-A-A-G--G---T-TT---CA-G-A-----G-G-G-A--CA-T-----GG--A--ATT---C-C-G-   |   |   |   |   |   |   |   |   |   |   |   |   |   |    |   |   |     |    |   |   |   |   |   |   |    |   |  |
|         | G-GT--GG-A-G-TG-GT--G---A--A-A---TG-C-GT-AG--AG-A-TC--C-G--G-A-G-G-A-AC-A-CC---AA--T--G--GC-GAA-G--G-C-A-----G--T-G-T-C---CTG--G--GA-A-G-----C-T---C-C-T--GA--CG-C-T-C--A-GG--T-G-CG-A--AA-G-C---C-AG--GG-G--             |   |   |   |   |   |   |   |   |   |   |   |   |   |    |   |   |     |    |   |   |   |   |   |   |    |   |  |
|         | AG-C-G-AA-----CG--GGBacteria(100);unclassified(100);unclassified(100);unclassified(100);unclassified(100);unclassified(100);unclassified(100);unclassified(100);unclassified(100);                                        |   |   |   |   |   |   |   |   |   |   |   |   |   |    |   |   |     |    |   |   |   |   |   |   |    |   |  |
| Otu1428 | 0                                                                                                                                                                                                                         | 0 | 0 | 0 | 0 | 0 | 0 | 0 | 0 | 0 | 0 | 0 | 0 | 0 | 0  | 0 | 0 | 0   | 0  | 0 | 0 | 0 | 0 | 0 | 0 | 0  | 0 |  |
|         | 0                                                                                                                                                                                                                         | 0 | 0 | 0 | 0 | 0 | 0 | 0 | 0 | 0 | 0 | 0 | 0 | 0 | 0  | 0 | 0 | 73  | 0  | 0 | 0 | 0 | 0 | 0 | 0 | 0  | 0 |  |
|         | 0                                                                                                                                                                                                                         | 0 | 0 | 0 | 0 | 0 | 0 | 0 | 0 | 0 | 0 | 0 | 0 | 6 | 15 | 0 | 0 | 0   | 0  | 0 | 0 | 0 | 0 | 0 | 0 | 0  | 0 |  |
|         | 0                                                                                                                                                                                                                         | 0 | 0 | 0 | 0 | 0 | 8 | 0 | 0 | 0 | 0 | 0 | 0 | 0 | 0  | 0 | 0 | 11  | 73 | 1 | 0 | 0 | 0 | 0 | 0 |    |   |  |
|         | M02255_77_000000000-ADUT3_1_1106_5218_19762T---AC--GT-AG-GGG-----GCA-A-G-----C--G--T---T--AT-C-CGG-AT-----TT-A--C-T--GG-GT-----GT--A---AA-GG-GA-GC-----G-TA-G-A-C-G-----G--A-AT-G-G-C-----                                |   |   |   |   |   |   |   |   |   |   |   |   |   |    |   |   |     |    |   |   |   |   |   |   |    |   |  |
|         | AA---G-T-C-T-----G-A-A--G--TG--A-AA-TG--C-C-CG-G-G----CT-C-AA-----C-C-C-G-G-G-A--A-C---T-G--C-T--T--T-----G--GA-A-A--C-----T--G-T--CG--A-T-C---T-T-G-A-G-T--G---T-TG---GA-G-A-----G-G-T-A--AG-T-----GG--A--ATT---C-C-T-   |   |   |   |   |   |   |   |   |   |   |   |   |   |    |   |   |     |    |   |   |   |   |   |   |    |   |  |
|         | G-GT--GT-A-G-CG-GT--G---A--A-A---TG-C-GT-AG--AG-A-TC--A-G--G-A-A-G-A-AC-A-CC---GG--A--G--GC-GAA-G--G-C-G-----G--C-T-T-A---CTG--G--AC-A-A-----A-G---A-C-T--GA--CG-T-T-G--A-GG--C-T-CG-A--AA-G-C---G-TG--GG-A--             |   |   |   |   |   |   |   |   |   |   |   |   |   |    |   |   |     |    |   |   |   |   |   |   |    |   |  |
|         | AG-C-A-AA-----CA--GGBacteria(100);Firmicutes(100);Clostridia(100);Clostridiales(100);Lachnospiraceae(100);Oribacterium(100);unclassified(100);unclassified(100);unclassified(100);                                        |   |   |   |   |   |   |   |   |   |   |   |   |   |    |   |   |     |    |   |   |   |   |   |   |    |   |  |
| Otu1429 | 0                                                                                                                                                                                                                         | 0 | 0 | 0 | 0 | 0 | 0 | 0 | 0 | 0 | 0 | 0 | 0 | 0 | 0  | 0 | 0 | 0   | 0  | 0 | 0 | 0 | 0 | 0 | 0 | 0  | 0 |  |
|         | 0                                                                                                                                                                                                                         | 0 | 0 | 0 | 0 | 0 | 0 | 0 | 0 | 0 | 0 | 0 | 0 | 0 | 0  | 0 | 0 | 708 | 0  | 0 | 0 | 0 | 0 | 0 | 0 | 0  | 0 |  |
|         | 0                                                                                                                                                                                                                         | 0 | 0 | 0 | 0 | 0 | 0 | 0 | 0 | 0 | 0 | 0 | 0 | 0 | 0  | 0 | 0 | 0   | 0  | 0 | 1 | 0 | 0 | 0 | 0 | 0  | 0 |  |
|         | 0                                                                                                                                                                                                                         | 0 | 0 | 0 | 0 | 0 | 0 | 0 | 0 | 0 | 0 | 0 | 0 | 0 | 71 | 0 | 0 | 0   | 0  | 0 | 0 | 0 | 0 | 0 | 0 |    |   |  |
|         | M02255_77_000000000-ADUT3_1_1101_7009_9824T---AC--GT-AG-GGA-----GCG-A-G-----C--G--T---T--AT-C-CGG-AT-----TT-A--C-T--GG-GT-----GT--A---AA-GG-GC-GA-----G-TA-G-G-C-G-----G--G-AC-G-G-C-----                                 |   |   |   |   |   |   |   |   |   |   |   |   |   |    |   |   |     |    |   |   |   |   |   |   |    |   |  |
|         | AA---G-T-T-G-----G-G-A--G--TG--A-AA-TC--T-G-GG-G-G----CT-T-AA-----C-C-C-C-C-A-A--A-C---T-G--C-T--T--T-----C--AA-A-A--C-----T--G-C--TG--T-T-C---T-T-G-A-G-T--G---A-TG---GA-G-A-----G-G-C-A--GG-C-----GG--A--ATT---C-C-C-   |   |   |   |   |   |   |   |   |   |   |   |   |   |    |   |   |     |    |   |   |   |   |   |   |    |   |  |
|         | A-GT--GT-A-G-CG-GT--G---A--A-A---TG-C-GT-AG--AT-A-TT--G-G--G-A-G-G-A-AC-A-CC---AG--T--G--GC-GAA-G--G-C-G-----G--C-C-T-G---CTG--G--AC-A-T-----T-A---A-C-T--GA--CG-C-T-G--A-GG--A-G-CG-A--AA-G-C---G-TG--GG-G--             |   |   |   |   |   |   |   |   |   |   |   |   |   |    |   |   |     |    |   |   |   |   |   |   |    |   |  |
|         | AG-C-A-AA-----CA--GGBacteria(100);Firmicutes(100);Clostridia(100);Clostridiales(100);unclassified(100);unclassified(100);unclassified(100);unclassified(100);unclassified(100);                                           |   |   |   |   |   |   |   |   |   |   |   |   |   |    |   |   |     |    |   |   |   |   |   |   |    |   |  |



|         |                                                                                                                                                                                                                                                                                                                                                                                                                                                                                                                                                                                                                                                                                                                                                                                                               |   |   |   |   |   |   |   |   |   |   |   |   |   |   |   |   |   |     |   |   |   |   |   |   |   |   |  |
|---------|---------------------------------------------------------------------------------------------------------------------------------------------------------------------------------------------------------------------------------------------------------------------------------------------------------------------------------------------------------------------------------------------------------------------------------------------------------------------------------------------------------------------------------------------------------------------------------------------------------------------------------------------------------------------------------------------------------------------------------------------------------------------------------------------------------------|---|---|---|---|---|---|---|---|---|---|---|---|---|---|---|---|---|-----|---|---|---|---|---|---|---|---|--|
| Otu1430 | 0                                                                                                                                                                                                                                                                                                                                                                                                                                                                                                                                                                                                                                                                                                                                                                                                             | 0 | 0 | 0 | 0 | 0 | 0 | 0 | 0 | 0 | 0 | 0 | 0 | 0 | 0 | 0 | 0 | 0 | 0   | 0 | 0 | 0 | 0 | 0 | 0 | 0 | 0 |  |
|         | 0                                                                                                                                                                                                                                                                                                                                                                                                                                                                                                                                                                                                                                                                                                                                                                                                             | 0 | 0 | 0 | 0 | 0 | 0 | 0 | 0 | 0 | 0 | 0 | 0 | 0 | 0 | 0 | 0 | 0 | 51  | 0 | 0 | 0 | 0 | 0 | 0 | 0 | 0 |  |
|         | 0                                                                                                                                                                                                                                                                                                                                                                                                                                                                                                                                                                                                                                                                                                                                                                                                             | 0 | 0 | 0 | 0 | 0 | 0 | 0 | 0 | 0 | 0 | 0 | 0 | 0 | 0 | 0 | 0 | 0 | 0   | 0 | 0 | 0 | 0 | 0 | 0 | 0 | 0 |  |
|         | 0                                                                                                                                                                                                                                                                                                                                                                                                                                                                                                                                                                                                                                                                                                                                                                                                             | 0 | 0 | 0 | 0 | 0 | 0 | 0 | 0 | 0 | 0 | 0 | 0 | 0 | 0 | 0 | 0 | 0 | 0   | 0 | 0 | 0 | 0 | 0 | 0 | 0 | 0 |  |
|         | M02255_77_000000000-ADUT3_1_1103_22319_10893 T---AC--GT-AG-GGG-----GCA-A-G-----C-G-T--T--AT-C-CGG-AT-----TT-A--C-T-GG-GT-----GT-A----AA-GG-GA-GC-----G-TA-G-A-C-G-----G--C-GA-T-G-C-----AA---G-T-C-T-----G-G-A--G--TG--A-AA-GC--C-C-GG-G-G----CT-C-AA-----C-C-C-C-G-G-G--A-C---T-G--C-T--T-T-----G--GA-A-A--C-----T--G-T--GT--T-G-C---T-G-G-A-G-T--G--C-AG----GA-G-A-----G-G-T-A--AG-T-----GG-A--ATT-----C-C-T-A-GT--GT-A-G-CG-GT--G---A-A-A--TG-C-GT-AG--AT-A-TT--A-G--G-A-G-G-A-AC-A-CC--AG--T--G--GC-GAA-G--G-C-G-----G--C-T-T-A--CTG--G--AC-T-G-----T-A--A-C-T-GA--CG-T-T-G--A-GG--C-T-CG-A-AA-G-C--G-TG--GG-G--AG-C-A-AA-----CA--GG Bacteria(100);Firmicutes(100);Clostridia(100);Clostridiales(100);Lachnospiraceae(100);Incertae_Sedis(100);unclassified(100);unclassified(100);unclassified(100);     |   |   |   |   |   |   |   |   |   |   |   |   |   |   |   |   |   |     |   |   |   |   |   |   |   |   |  |
| Otu1431 | 0                                                                                                                                                                                                                                                                                                                                                                                                                                                                                                                                                                                                                                                                                                                                                                                                             | 0 | 0 | 0 | 0 | 0 | 0 | 0 | 0 | 0 | 0 | 0 | 0 | 0 | 0 | 0 | 0 | 0 | 0   | 0 | 0 | 0 | 0 | 0 | 0 | 0 | 0 |  |
|         | 0                                                                                                                                                                                                                                                                                                                                                                                                                                                                                                                                                                                                                                                                                                                                                                                                             | 0 | 0 | 0 | 0 | 0 | 0 | 0 | 0 | 0 | 0 | 0 | 0 | 0 | 0 | 0 | 0 | 0 | 138 | 0 | 0 | 0 | 0 | 0 | 0 | 0 | 0 |  |
|         | 0                                                                                                                                                                                                                                                                                                                                                                                                                                                                                                                                                                                                                                                                                                                                                                                                             | 0 | 0 | 0 | 0 | 0 | 0 | 0 | 0 | 0 | 0 | 0 | 0 | 0 | 0 | 0 | 0 | 0 | 0   | 0 | 0 | 0 | 0 | 0 | 0 | 0 | 0 |  |
|         | 0                                                                                                                                                                                                                                                                                                                                                                                                                                                                                                                                                                                                                                                                                                                                                                                                             | 0 | 0 | 0 | 0 | 0 | 0 | 0 | 0 | 0 | 0 | 0 | 0 | 0 | 0 | 0 | 0 | 0 | 0   | 0 | 0 | 0 | 0 | 0 | 0 | 0 | 0 |  |
|         | M02255_77_000000000-ADUT3_1_1106_7208_3210 G---TG--CC-AG-CAG-----CCG-C-G-----G--T--A--AT-A-CGG-AG-----GA-T--C-C--GA-GC-----GT--T----AT-CC-GG-AT-----T-TA-G-G-T-G-----G--G-TT-G-A-T-----AA---G-T-C-A-----G-C-G--G--TG--A-AA-GT--T-T-GC-A-G----CT-T-AA-----C-T-G-T-A-A-A--A-A--T-G--C-C--G-T-----T-GA-A-A--C-----T--G-T--CG--G-A-C---T-T-G-A-G-T--G--T-AA----AT-G-A-----G-G-T-A--GG-C-----GG-A--ATG---C-G-T-G--GT--GT-A-G-CG-GT--G---A-A-A--TG-C-AT-AG--AT-A-TC--A-C--G-C-A-G-A-AC-T-CC--GA--T--T--GC-GAA-G--G-C-A-----G--C-T-T-A--CTA--A--GC-T-A-----C-A--A-C-T-GA--CA-C-T-G--A-AG--C-A-CG-A-AA-G-C--G-TG--GG-G--AT-C-A-AA-----CA--GG Bacteria(100);Bacteroidetes(100);Bacteroidia(100);Bacteroidales(100);Porphyromonadaceae(100);Parabacteroides(100);unclassified(100);unclassified(100);unclassified(100); |   |   |   |   |   |   |   |   |   |   |   |   |   |   |   |   |   |     |   |   |   |   |   |   |   |   |  |
| Otu1432 | 0                                                                                                                                                                                                                                                                                                                                                                                                                                                                                                                                                                                                                                                                                                                                                                                                             | 0 | 0 | 0 | 0 | 0 | 0 | 0 | 0 | 0 | 0 | 0 | 0 | 0 | 0 | 0 | 0 | 0 | 0   | 0 | 0 | 0 | 0 | 0 | 0 | 0 | 0 |  |
|         | 0                                                                                                                                                                                                                                                                                                                                                                                                                                                                                                                                                                                                                                                                                                                                                                                                             | 0 | 0 | 0 | 0 | 0 | 0 | 0 | 0 | 0 | 0 | 0 | 0 | 0 | 0 | 0 | 0 | 0 | 49  | 0 | 0 | 0 | 0 | 0 | 0 | 0 | 0 |  |
|         | 0                                                                                                                                                                                                                                                                                                                                                                                                                                                                                                                                                                                                                                                                                                                                                                                                             | 0 | 0 | 0 | 0 | 0 | 0 | 0 | 0 | 0 | 0 | 0 | 0 | 0 | 0 | 0 | 0 | 0 | 0   | 0 | 0 | 0 | 0 | 0 | 0 | 0 | 0 |  |
|         | 0                                                                                                                                                                                                                                                                                                                                                                                                                                                                                                                                                                                                                                                                                                                                                                                                             | 0 | 0 | 0 | 0 | 0 | 0 | 0 | 0 | 0 | 0 | 0 | 0 | 0 | 0 | 0 | 0 | 0 | 0   | 0 | 0 | 0 | 0 | 0 | 0 | 0 | 0 |  |
|         | M02255_77_000000000-ADUT3_1_1106_6444_13621 T---AC--GT-AG-GGG-----ACA-A-G-----C-G-T--T--GT-C-CGG-AT-----TT-A--C-T--GG-GC-----GT-A----AA-GG-GC-AC-----G-CA-G-G-C-G-----G--T-TT-T-T-T-----AA---G-T-C-A-----G-A-T--G--TG--A-AA-GG--T-A-CC-G-G----CT-C-AA-----C-C-G-G-T-G-A--C-A---T-G--C-A--T-T-----T-GA-A-A--C-----T--G-A-AA--G-A-C---T-T-G-A-G-T--A--T-TG----GA-G-A-----G-G-C-A--AG-T-----GG-A--ATT---C-C-T-A-GT--GT-A-G-CG-GT--G---A-A-A--TG-C-GT-AG--AT-A-TC--A-G--G-A-G-G-A-AC-A-CC--GG--T--G--GC-GAA-G--G-C--G-----G--C-T-T-G--CTG--G--AC-A-A-----A-T--A-C-T-GA--CA-C-T-G--A-AG--C-A-CG-A-AA-G-C--G-TG--GG-G--AG-C-A-AA-----CA--GG Bacteria(100);Firmicutes(100);Clostridia(100);Clostridiales(100);Eubacteriaceae(100);Acetobacterium(100);unclassified(100);unclassified(100);unclassified(100);         |   |   |   |   |   |   |   |   |   |   |   |   |   |   |   |   |   |     |   |   |   |   |   |   |   |   |  |
| Otu1433 | 0                                                                                                                                                                                                                                                                                                                                                                                                                                                                                                                                                                                                                                                                                                                                                                                                             | 0 | 0 | 0 | 0 | 0 | 0 | 0 | 0 | 0 | 0 | 0 | 0 | 0 | 0 | 0 | 0 | 0 | 0   | 0 | 0 | 0 | 0 | 0 | 0 | 0 | 0 |  |
|         | 0                                                                                                                                                                                                                                                                                                                                                                                                                                                                                                                                                                                                                                                                                                                                                                                                             | 0 | 0 | 0 | 0 | 0 | 0 | 0 | 0 | 0 | 0 | 0 | 0 | 0 | 0 | 0 | 0 | 0 | 52  | 0 | 0 | 0 | 0 | 0 | 0 | 0 | 0 |  |
|         | 0                                                                                                                                                                                                                                                                                                                                                                                                                                                                                                                                                                                                                                                                                                                                                                                                             | 0 | 0 | 0 | 0 | 0 | 0 | 0 | 0 | 0 | 0 | 0 | 0 | 0 | 0 | 0 | 0 | 0 | 0   | 0 | 0 | 0 | 0 | 0 | 0 | 0 | 0 |  |
|         | 0                                                                                                                                                                                                                                                                                                                                                                                                                                                                                                                                                                                                                                                                                                                                                                                                             | 0 | 0 | 0 | 0 | 0 | 0 | 0 | 0 | 0 | 0 | 0 | 0 | 0 | 0 | 0 | 0 | 0 | 0   | 0 | 0 | 0 | 0 | 0 | 0 | 0 | 0 |  |
|         | M02255_77_000000000-ADUT3_1_1107_22186_5761 T---AC--GT-AG-GCA-----GCG-A-G-----C-G-T--T--GT-T-CGG-AA-----TT-A--C-T--                                                                                                                                                                                                                                                                                                                                                                                                                                                                                                                                                                                                                                                                                           |   |   |   |   |   |   |   |   |   |   |   |   |   |   |   |   |   |     |   |   |   |   |   |   |   |   |  |



|                                                                                                                                                                                                                                                                                                                                                                                                                                                                                                                                                                                                                                                                                                                                                                                                                                   |   |   |   |   |   |   |   |   |   |   |   |   |   |   |   |   |   |   |    |   |   |   |   |   |   |   |   |
|-----------------------------------------------------------------------------------------------------------------------------------------------------------------------------------------------------------------------------------------------------------------------------------------------------------------------------------------------------------------------------------------------------------------------------------------------------------------------------------------------------------------------------------------------------------------------------------------------------------------------------------------------------------------------------------------------------------------------------------------------------------------------------------------------------------------------------------|---|---|---|---|---|---|---|---|---|---|---|---|---|---|---|---|---|---|----|---|---|---|---|---|---|---|---|
| Otu1435                                                                                                                                                                                                                                                                                                                                                                                                                                                                                                                                                                                                                                                                                                                                                                                                                           | 0 | 0 | 0 | 0 | 0 | 0 | 0 | 0 | 0 | 0 | 0 | 0 | 0 | 0 | 0 | 0 | 0 | 0 | 0  | 0 | 0 | 0 | 0 | 0 | 0 | 0 | 0 |
|                                                                                                                                                                                                                                                                                                                                                                                                                                                                                                                                                                                                                                                                                                                                                                                                                                   | 0 | 0 | 0 | 0 | 0 | 0 | 0 | 0 | 0 | 0 | 0 | 0 | 0 | 0 | 0 | 0 | 0 | 0 | 46 | 0 | 0 | 0 | 0 | 0 | 0 | 0 | 0 |
|                                                                                                                                                                                                                                                                                                                                                                                                                                                                                                                                                                                                                                                                                                                                                                                                                                   | 0 | 0 | 0 | 0 | 0 | 0 | 0 | 0 | 0 | 0 | 0 | 0 | 0 | 0 | 0 | 0 | 0 | 0 | 0  | 0 | 0 | 0 | 0 | 0 | 0 | 0 | 0 |
|                                                                                                                                                                                                                                                                                                                                                                                                                                                                                                                                                                                                                                                                                                                                                                                                                                   | 0 | 0 | 0 | 0 | 0 | 0 | 0 | 0 | 0 | 0 | 0 | 0 | 0 | 0 | 0 | 0 | 0 | 0 | 0  | 0 | 0 | 0 | 0 | 0 | 0 | 0 | 0 |
| M02255_77_000000000-ADUT3_1_1111_19495_20151 T---AC---AG-AG-GCC-----ACA-A-G-----C--G--T---T--AG-G-CGG-AA-----TC-A--C-T--GG-GC-----TT--A-----AA-GC-GT-GT-----G-TA-G-G-C-G-----G--G-AT-G-G-T-----                                                                                                                                                                                                                                                                                                                                                                                                                                                                                                                                                                                                                                   |   |   |   |   |   |   |   |   |   |   |   |   |   |   |   |   |   |   |    |   |   |   |   |   |   |   |   |
| -----AA---G-T-A-C-----T-T-T-G--TG--A-AA-TC--C-C-AC-G-G----CT-C-AA-----C-C-G-T-G-G-A--A-A---T-G--C-T---T-G-----G--TA-T-A--C-----T-G-C--CG--T-T-C---T-T-G-A-A-T--C--A-CC-----TA-G-G-----G-G-C-A--GC-T-----GG--A--ACT---G-A-T-G-GT--GG-A-G-CG-GT--G---A--A-A---TG-C-AT-AG--AT-A-TC--A-T--C-A-G-G-A-AC-G-CC--AA--T--G--GT-GCA-G-A-C-A-----A-G-C-T-G--CTG-G--GG-G-T-----G-T--A-T-T-GA--CG-C-T-G--A-GG--C-A-CG-A-AA-G-C---T-AG--GG-G--AG-C-A-AA-----CG--GG Bacteria(100);unclassified(100);unclassified(100);unclassified(100);unclassified(100);unclassified(100);unclassified(100);unclassified(100);unclassified(100);                                                                                                                                                                                                               |   |   |   |   |   |   |   |   |   |   |   |   |   |   |   |   |   |   |    |   |   |   |   |   |   |   |   |
| Otu1436                                                                                                                                                                                                                                                                                                                                                                                                                                                                                                                                                                                                                                                                                                                                                                                                                           | 0 | 0 | 0 | 0 | 0 | 0 | 0 | 0 | 0 | 0 | 0 | 0 | 0 | 0 | 0 | 0 | 0 | 0 | 0  | 0 | 0 | 0 | 0 | 0 | 0 | 0 | 0 |
|                                                                                                                                                                                                                                                                                                                                                                                                                                                                                                                                                                                                                                                                                                                                                                                                                                   | 0 | 0 | 0 | 0 | 0 | 0 | 0 | 0 | 0 | 0 | 0 | 0 | 0 | 0 | 0 | 0 | 0 | 0 | 36 | 0 | 0 | 0 | 0 | 0 | 0 | 0 | 0 |
|                                                                                                                                                                                                                                                                                                                                                                                                                                                                                                                                                                                                                                                                                                                                                                                                                                   | 0 | 0 | 0 | 0 | 0 | 0 | 0 | 0 | 0 | 0 | 0 | 0 | 0 | 0 | 0 | 0 | 0 | 0 | 0  | 0 | 0 | 0 | 0 | 0 | 0 | 0 | 0 |
|                                                                                                                                                                                                                                                                                                                                                                                                                                                                                                                                                                                                                                                                                                                                                                                                                                   | 0 | 0 | 0 | 0 | 0 | 0 | 0 | 0 | 0 | 0 | 0 | 0 | 0 | 0 | 0 | 0 | 0 | 0 | 0  | 0 | 0 | 0 | 0 | 0 | 0 | 0 | 0 |
| M02255_76_000000000-ADUNE_1_2111_13746_14505 T---AC---GT-AG-GGC-----GCA-A-G-----C--G--T---T--AT-C-CGG-AT-----TT-A--T-T--GG-GC-----GT-----AA-----A--G--G-----G--C-TC-G-T-C-----GC---G-T-C-C-----G-G-T--G--TG--A-AA-GT--C-C-AT-C-G-----CT-T-AA-----C-G-G-T-G-G-A--T-C---T-G--C-G--C--C-----G--GG-T-A--C-----G--G-G--CG--G-G-C---T-G-G-A-G-T--G--C-GG---TA-G-G-----G-G-A-G--AC-T-----GG--A--ATT---C-C-C-G-GT--GT-A-A-CG-GT--G---G--A-A---TG-T-GT-AG--AT-A-TC--G-G--G-A-A-G-A-AC-A-CC--GA--T--G--GC-GAA-G--G-C-A-----G--G-T-C-T---CTG-G--GC-C-G-----T-C--A-C-T-GA--CG-C-T-G--A-GG--A-G-CG-A-AA-G-C---G-TG--GG-G--AG-C-G-AA-----CA--GG Bacteria(100);Actinobacteria(100);Actinobacteria(100);Actinobacteridae(100);Bifidobacteriales(100);Bifidobacteriaceae(100);Bifidobacterium(100);unclassified(100);unclassified(100);            |   |   |   |   |   |   |   |   |   |   |   |   |   |   |   |   |   |   |    |   |   |   |   |   |   |   |   |
| Otu1437                                                                                                                                                                                                                                                                                                                                                                                                                                                                                                                                                                                                                                                                                                                                                                                                                           | 0 | 0 | 0 | 0 | 0 | 0 | 0 | 0 | 0 | 0 | 0 | 0 | 0 | 0 | 0 | 0 | 0 | 0 | 0  | 0 | 0 | 0 | 0 | 0 | 0 | 0 | 0 |
|                                                                                                                                                                                                                                                                                                                                                                                                                                                                                                                                                                                                                                                                                                                                                                                                                                   | 0 | 0 | 0 | 0 | 0 | 0 | 0 | 0 | 0 | 0 | 0 | 0 | 0 | 0 | 0 | 0 | 0 | 0 | 28 | 0 | 0 | 0 | 0 | 0 | 0 | 0 | 0 |
|                                                                                                                                                                                                                                                                                                                                                                                                                                                                                                                                                                                                                                                                                                                                                                                                                                   | 0 | 0 | 0 | 0 | 0 | 0 | 0 | 0 | 0 | 0 | 0 | 0 | 0 | 0 | 0 | 0 | 0 | 0 | 0  | 0 | 0 | 0 | 0 | 0 | 0 | 0 | 0 |
|                                                                                                                                                                                                                                                                                                                                                                                                                                                                                                                                                                                                                                                                                                                                                                                                                                   | 0 | 0 | 0 | 0 | 0 | 0 | 0 | 0 | 0 | 0 | 0 | 0 | 0 | 0 | 0 | 0 | 0 | 0 | 0  | 0 | 0 | 0 | 0 | 0 | 0 | 0 | 0 |
| M02255_76_000000000-ADUNE_1_1109_17355_14788 C---CG---TG-CC-AGC-----AGC-C-G-----C--G--G---T--AA-TACGG-GG-----GG-T--G-C--AA-GC-----GT--T---AC-TC-GG-AA-----T-CA-C-T-G-G-----G--A-TT-A-A-T-----AA---G-T-T-T-----G-A-A-G--TG--A-AA-TC--C-T-AT-A-G-----CT-T-AA-----C-T-A-T-A-G-A--A-C---T-G--C-T---T-T-----G--AA-A-A--C-----T--G-T--TA--A-T-C---T-A-G-A-A-T--G--T-GG---GA-G-A-----G-G-T-A--GA-T-----GG--A--ATT---T-C-T-G-GT--GT-A-G-GG-GT--A---A--A-A---TC-C-GT-AG--AG-A-TC--A-G--A-A-G-G-A-AT-A-CC--GA--T--T--GC-GAA-G--G-C-G-----A--T-C-T-A--CTG-G--AA-C-A-----T-T--A-T-T-GA--CG-C-T-G--A-GA--T-G-CG-A-AA-G-C---G-TG--GG-G--AG-C-A-AA-----CA--GG Bacteria(100);Proteobacteria(100);Epsilonproteobacteria(100);Campylobacterales(100);Campylobacteraceae(100);Arcobacter(100);unclassified(100);unclassified(100);unclassified(100); |   |   |   |   |   |   |   |   |   |   |   |   |   |   |   |   |   |   |    |   |   |   |   |   |   |   |   |
| Otu1438                                                                                                                                                                                                                                                                                                                                                                                                                                                                                                                                                                                                                                                                                                                                                                                                                           | 0 | 0 | 0 | 0 | 0 | 0 | 0 | 0 | 0 | 0 | 0 | 0 | 0 | 0 | 0 | 0 | 0 | 0 | 0  | 0 | 0 | 0 | 0 | 0 | 0 | 0 | 0 |
|                                                                                                                                                                                                                                                                                                                                                                                                                                                                                                                                                                                                                                                                                                                                                                                                                                   | 0 | 0 | 0 | 0 | 0 | 0 | 0 | 0 | 0 | 0 | 0 | 0 | 0 | 0 | 0 | 0 | 0 | 0 | 28 | 0 | 0 | 0 | 0 | 0 | 0 | 0 | 0 |
|                                                                                                                                                                                                                                                                                                                                                                                                                                                                                                                                                                                                                                                                                                                                                                                                                                   | 0 | 0 | 0 | 0 | 0 | 0 | 0 | 0 | 0 | 0 | 0 | 0 | 0 | 0 | 0 | 0 | 0 | 0 | 0  | 0 | 0 | 0 | 0 | 0 | 0 | 0 | 0 |
|                                                                                                                                                                                                                                                                                                                                                                                                                                                                                                                                                                                                                                                                                                                                                                                                                                   | 0 | 0 | 0 | 0 | 0 | 0 | 0 | 0 | 0 | 0 | 0 | 0 | 0 | 0 | 0 | 0 | 0 | 0 | 0  | 0 | 0 | 0 | 0 | 0 | 0 | 0 | 0 |
| M02255_77_000000000-ADUT3_1_1107_17174_13846 T---AC---GT-AG-GGT-----CCA-A-G-----C--G--T---T--AT-C-CGG-AT-----TT-A--C-T--GG-GT-----GT--A-----AA-GG-GC-GA-----G-TA-G-A-C-G-----G--T-TA-G-G-C-----AA---G-T-C-A-----G-A-T--G--TG--A-AA-AC--T-C-AG-G-G-----CT-C-AA-----C-T-T-T-G-A-G--A-C---T-G--C-A--T-C-----T--GA-A-A--C-----T--G-T--TT--A-A-C---T-A-G-A-G-T--G--C-AG---AA-G-A-----G-G-T-A--AG-T-----GG--A--ATT---C-C-T-A-GT--GT-A-G-CG-GT--G---A--A-A---TG-C-GT-AG--AT-A-TT--A-G--G-A-G-G-A-AC-A-CC--AG--T--G--GC-GAA-G--G-C-G-----A--C-T-T-A--CTG-G--GC-T-G-----T-A--A-C-T-GA--CG-T-T-G--A-GG--C-G-CG-A-AA-G-T---G-TG--GG-G--AG-C-A-AA-----CA--GG Bacteria(100);unclassified(100);unclassified(100);unclassified(100);unclassified(100);unclassified(100);unclassified(100);unclassified(100);unclassified(100);                   |   |   |   |   |   |   |   |   |   |   |   |   |   |   |   |   |   |   |    |   |   |   |   |   |   |   |   |
| Otu1439                                                                                                                                                                                                                                                                                                                                                                                                                                                                                                                                                                                                                                                                                                                                                                                                                           | 0 | 0 | 0 | 0 | 0 | 0 | 0 | 0 | 0 | 0 | 0 | 0 | 0 | 0 | 0 | 0 | 0 | 0 | 0  | 0 | 0 | 0 | 0 | 0 | 0 | 0 | 0 |
|                                                                                                                                                                                                                                                                                                                                                                                                                                                                                                                                                                                                                                                                                                                                                                                                                                   | 0 | 0 | 0 | 0 | 0 | 0 | 0 | 0 | 0 | 0 | 0 | 0 | 0 | 0 | 0 | 0 | 0 | 0 | 1  | 0 | 0 | 0 | 0 | 0 | 0 | 4 | 0 |
|                                                                                                                                                                                                                                                                                                                                                                                                                                                                                                                                                                                                                                                                                                                                                                                                                                   | 0 | 0 | 0 | 0 | 0 | 0 | 0 | 0 | 0 | 0 | 0 | 0 | 0 | 0 | 0 | 0 | 0 | 0 | 0  | 0 | 0 | 0 | 0 | 0 | 0 | 0 | 0 |
|                                                                                                                                                                                                                                                                                                                                                                                                                                                                                                                                                                                                                                                                                                                                                                                                                                   | 0 | 0 | 0 | 0 | 0 | 0 | 0 | 0 | 0 | 0 | 0 | 0 | 0 | 0 | 0 | 0 | 0 | 0 | 0  | 0 | 0 | 0 | 0 | 0 | 0 | 0 | 0 |
| M02255_77_000000000-ADUT3_1_1111_3505_8514 T---AC---GG-AG-GAG-----GCA-A-G-----C--G--T---T--AT-C-CGG-AA-----TT-A--T-T--GG-GC-----GT--A-----AA-GC-GT-CC-----G-TA-G-G-T-G-----G--C-TT-TCT-C-----AA---G-T-C-T-----G-C-G--G--TT--A-AA-GA--C-T-GG-G-G-----CT-T-AA-----C-T-C-C-A-G-A--A-A---G-G--C-C--G--T-----G--GA-A-A--C-----T--G-A-AA-G-G-C---T-A-G-A-G-A--G---C-CG---TA-G-G-----G-G-T-A--GA-G---GG--A--ATT---C-C-C-G-GT--GT-A-G-CG-GT--G---A--A-A---TG-C-GT-AG--AG-C-TC--G-G--G-A-A-G-A-AC-A-TC---GG--T--G--GC-GAA-A--G-C-G-----C--T-C-T-A--CTG-G--AC-G-G-----T-A--T-C-T-GA--CA-C-T-G--A-GG--G-A-CG-A-AA-G-C---T-AG--GG-G--AG-C-G-AA-----TG--GG Bacteria(100);Cyanobacteria(100);unclassified(100);unclassified(100);unclassified(100);unclassified(100);unclassified(100);unclassified(100);unclassified(100);                     |   |   |   |   |   |   |   |   |   |   |   |   |   |   |   |   |   |   |    |   |   |   |   |   |   |   |   |



|                                              |   |                                                                                                                                                                                                                                                                                                                                                                                                                                                                                                                                                                                                                               |   |   |   |   |   |   |   |   |   |   |   |   |   |   |   |   |   |   |    |   |   |   |   |   |   |   |  |
|----------------------------------------------|---|-------------------------------------------------------------------------------------------------------------------------------------------------------------------------------------------------------------------------------------------------------------------------------------------------------------------------------------------------------------------------------------------------------------------------------------------------------------------------------------------------------------------------------------------------------------------------------------------------------------------------------|---|---|---|---|---|---|---|---|---|---|---|---|---|---|---|---|---|---|----|---|---|---|---|---|---|---|--|
| Otu1440                                      | 0 | 0                                                                                                                                                                                                                                                                                                                                                                                                                                                                                                                                                                                                                             | 0 | 0 | 0 | 0 | 0 | 0 | 0 | 0 | 0 | 0 | 0 | 0 | 0 | 0 | 0 | 0 | 0 | 0 | 0  | 0 | 0 | 0 | 0 | 0 | 0 |   |  |
|                                              | 0 | 0                                                                                                                                                                                                                                                                                                                                                                                                                                                                                                                                                                                                                             | 0 | 0 | 0 | 0 | 0 | 0 | 0 | 0 | 0 | 0 | 0 | 0 | 0 | 0 | 0 | 0 | 1 | 0 | 0  | 0 | 0 | 0 | 3 | 0 | 0 | 0 |  |
|                                              | 0 | 0                                                                                                                                                                                                                                                                                                                                                                                                                                                                                                                                                                                                                             | 0 | 0 | 0 | 0 | 0 | 0 | 0 | 0 | 0 | 0 | 0 | 0 | 0 | 0 | 6 | 0 | 0 | 0 | 0  | 0 | 0 | 0 | 0 | 0 | 0 |   |  |
|                                              | 0 | 0                                                                                                                                                                                                                                                                                                                                                                                                                                                                                                                                                                                                                             | 0 | 0 | 0 | 0 | 0 | 0 | 0 | 0 | 0 | 0 | 0 | 0 | 0 | 0 | 0 | 0 | 0 | 0 | 0  | 0 | 0 | 0 | 0 | 0 |   |   |  |
| M02255_76_000000000-ADUNE_1_2119_22317_21913 |   | A---GA---AA-CC-CCG-----GCT-A-A-----C--T--C---C-GTGC-CAG-CA-----GC-C--G-C--GG-TA-----AT--A-----CG-GA-GG-GG-----G-TT-A-G-C-GT-----T--G-TT-C-G-G---<br>-----AAT---G-A-C-T-----G-G-GC-G--TG--A-AA-GCG-CGCGTAGG-G----CT-C-AA-----C-C-C-T-G-G-A--A-T---T-G--C-C---T--T-----C-AA-G-A--C-----T--C-G--CG-G-T-C---T-G-G-A-G-T--T---C-GA-----GA-G-A-----G-G-T-G---GG-T-----GG--A--<br>ATT---C-C-G-A-GT--GT-A-G-AG-GT--G---A--A-A---TT-C-GT-AG--AT-A-TT--C-G--G-A-G-G-A-AC-A-CC---AG--T--G--GC-GAA-G--G-C--G-----G--C-C-C-A---CTG--G--CT-C-G-----A-C---A-C-T--GA--CG-C-T-G--A-GG--C-G-CG-A--AA-G-C---G-<br>CG--GG-G--AG-C-A-AA-----CA--GG |   |   |   |   |   |   |   |   |   |   |   |   |   |   |   |   |   |   |    |   |   |   |   |   |   |   |  |
|                                              |   | Bacteria(100);Proteobacteria(100);Alphaproteobacteria(100);unclassified(100);unclassified(100);unclassified(100);unclassified(100);unclassified(100);unclassified(100);                                                                                                                                                                                                                                                                                                                                                                                                                                                       |   |   |   |   |   |   |   |   |   |   |   |   |   |   |   |   |   |   |    |   |   |   |   |   |   |   |  |
| Otu1441                                      | 0 | 0                                                                                                                                                                                                                                                                                                                                                                                                                                                                                                                                                                                                                             | 0 | 0 | 0 | 0 | 0 | 0 | 0 | 0 | 0 | 0 | 0 | 0 | 0 | 0 | 0 | 0 | 0 | 0 | 0  | 0 | 0 | 0 | 0 | 0 | 0 |   |  |
|                                              | 0 | 0                                                                                                                                                                                                                                                                                                                                                                                                                                                                                                                                                                                                                             | 0 | 0 | 0 | 0 | 0 | 0 | 0 | 0 | 0 | 0 | 0 | 0 | 0 | 0 | 0 | 0 | 0 | 0 | 0  | 0 | 0 | 0 | 0 | 0 | 0 |   |  |
|                                              | 0 | 0                                                                                                                                                                                                                                                                                                                                                                                                                                                                                                                                                                                                                             | 0 | 0 | 0 | 0 | 0 | 0 | 0 | 0 | 0 | 0 | 0 | 0 | 0 | 0 | 0 | 0 | 0 | 0 | 0  | 0 | 0 | 0 | 3 | 3 | 0 | 0 |  |
|                                              | 0 | 0                                                                                                                                                                                                                                                                                                                                                                                                                                                                                                                                                                                                                             | 0 | 0 | 0 | 0 | 0 | 0 | 7 | 0 | 4 | 0 | 2 | 0 | 0 | 0 | 0 | 0 | 0 | 0 | 0  | 0 | 0 | 0 | 0 | 0 |   |   |  |
| M02255_77_000000000-ADUT3_1_1105_13001_23478 |   | C---GT--GC-CA-GCA-----GCC-G-C-----G--G--T--A--AT-A-CGT-AT-----GG-A--G-C--GA-GC-----GT--T-----GT-CC-GG-AA-----T-TA-T-T-G-G-----G--C-GT-A-A-A-----<br>-----GG---G-TAC-G-----C-A-G--G--TT--A-AA-GA--T-C-GG-G-G-----CT-C-AA-----C-C-C-C-G-T-A-A-----A-G--C-A--T--T-----G--GA-A-A--C-----T--G-A--TA--A-A-C---T-T-G-A-G-T-A--G-TG---GA-G-A-----G-G-A-A--AG-T-----GG--A--ATT---<br>C-C-T-A-GT--GT-A-G-TG-GT--G---A--A-A---TA-C-GT-AG--AT-A-TT--A-G--G-A-G-G-A-AT-A-CC---AG--T--A--GC-GAA-G--G-C--G-----A--C-T-T-T---CTG--G--AC-A-C-----A-A--A-C-T--GA--CG-C-T-G--A-GG--T-A-CG-A--AA-G-C---G-TG--GG-<br>G--AG-C-A-AA-----CA--GG       |   |   |   |   |   |   |   |   |   |   |   |   |   |   |   |   |   |   |    |   |   |   |   |   |   |   |  |
|                                              |   | Bacteria(100);Firmicutes(100);Clostridia(100);Clostridiales(100);Family_XI_Incertae_Sedis(100);Finegoldia(100);unclassified(100);unclassified(100);unclassified(100);                                                                                                                                                                                                                                                                                                                                                                                                                                                         |   |   |   |   |   |   |   |   |   |   |   |   |   |   |   |   |   |   |    |   |   |   |   |   |   |   |  |
| Otu1442                                      | 0 | 0                                                                                                                                                                                                                                                                                                                                                                                                                                                                                                                                                                                                                             | 0 | 0 | 0 | 0 | 0 | 0 | 0 | 0 | 0 | 0 | 0 | 0 | 0 | 0 | 0 | 0 | 0 | 0 | 0  | 0 | 0 | 0 | 0 | 0 | 0 |   |  |
|                                              | 0 | 0                                                                                                                                                                                                                                                                                                                                                                                                                                                                                                                                                                                                                             | 0 | 0 | 0 | 0 | 0 | 0 | 0 | 0 | 0 | 0 | 0 | 0 | 0 | 0 | 0 | 0 | 0 | 0 | 41 | 0 | 0 | 0 | 0 | 0 | 0 |   |  |
|                                              | 0 | 0                                                                                                                                                                                                                                                                                                                                                                                                                                                                                                                                                                                                                             | 0 | 0 | 0 | 0 | 0 | 0 | 0 | 0 | 0 | 0 | 0 | 0 | 0 | 0 | 0 | 0 | 0 | 0 | 0  | 0 | 0 | 0 | 0 | 0 | 0 |   |  |
|                                              | 0 | 0                                                                                                                                                                                                                                                                                                                                                                                                                                                                                                                                                                                                                             | 0 | 0 | 0 | 0 | 0 | 0 | 0 | 0 | 0 | 0 | 0 | 0 | 0 | 0 | 0 | 0 | 0 | 0 | 0  | 0 | 0 | 0 | 0 | 0 |   |   |  |
| M02255_76_000000000-ADUNE_1_1105_27940_11581 |   | C---CG--GC-TA-ACT-----TCG-T-G-----C--C--A--G--CA-G-CCG-CG-----GT-A--A-T--AC-GA-----AG--G-----GT-CC-AA-GC-----G-TT-GTT-C-G-----G--A-TC-A-G-C-----<br>-----AA---G-T-C-A-----G-G-T--G--TG--A-AA-TC--T-C-GG-G-G-----CT-C-AA-----C-C-C-C-G-A-A--A-C---T-G--C-G---C--C-----T--GA-A-A--C-----T--G-C--TA-G-T-C---T-A-G-A-A-T--A--T-CG---GA-G-G-----G-G-G-C---AG-G-----GG--A--ATT---<br>T-C-A-C-GT--GT-A-G-GG-GT--A---A--A-A---TC-C-GT-AG--AG-A-TG--T-G--A-A-G-G-A-AC-A-CC---GG--G--G--GC-GAA-G--G-C--G-----C--C-T-G-C---CTG--G--AC-G-A-----T-T---A-T-T--GA--CG-C-T-G--A-GG--C-G-CG-A--AA-G-C---G-TG--<br>GG-G--AG-C-A-AA-----CA--GG   |   |   |   |   |   |   |   |   |   |   |   |   |   |   |   |   |   |   |    |   |   |   |   |   |   |   |  |
|                                              |   | Bacteria(100);Proteobacteria(100);Deltaproteobacteria(100);Bdellovibrionales(100);Bacteriovoraceae(100);Peredibacter(100);unclassified(100);unclassified(100);unclassified(100);                                                                                                                                                                                                                                                                                                                                                                                                                                              |   |   |   |   |   |   |   |   |   |   |   |   |   |   |   |   |   |   |    |   |   |   |   |   |   |   |  |
| Otu1443                                      | 0 | 0                                                                                                                                                                                                                                                                                                                                                                                                                                                                                                                                                                                                                             | 0 | 0 | 0 | 0 | 0 | 0 | 0 | 0 | 0 | 0 | 0 | 0 | 0 | 0 | 0 | 0 | 0 | 0 | 0  | 0 | 0 | 0 | 0 | 0 | 0 |   |  |
|                                              | 0 | 0                                                                                                                                                                                                                                                                                                                                                                                                                                                                                                                                                                                                                             | 0 | 0 | 0 | 0 | 0 | 0 | 0 | 0 | 0 | 0 | 0 | 0 | 0 | 0 | 0 | 0 | 0 | 0 | 12 | 0 | 0 | 0 | 0 | 0 | 0 |   |  |
|                                              | 0 | 0                                                                                                                                                                                                                                                                                                                                                                                                                                                                                                                                                                                                                             | 0 | 0 | 0 | 0 | 0 | 0 | 0 | 0 | 0 | 0 | 0 | 0 | 0 | 0 | 0 | 0 | 0 | 0 | 0  | 0 | 0 | 0 | 0 | 0 | 0 |   |  |
|                                              | 0 | 0                                                                                                                                                                                                                                                                                                                                                                                                                                                                                                                                                                                                                             | 0 | 0 | 0 | 0 | 0 | 0 | 0 | 0 | 0 | 0 | 0 | 0 | 0 | 0 | 0 | 0 | 0 | 0 | 0  | 0 | 0 | 0 | 0 | 0 |   |   |  |
| M02255_76_000000000-ADUNE_1_1113_25764_17739 |   | T---AC--GA-GG-GGT-----CCT-A-G-----C--G--T---T--GT-T-CGG-AA-----TC-A--T-T--GG-GC-----GT--A---AA-G--G-----G-T---G-T-----G-----T-----AA-<br>---G-T-C-A-----G-G-T--G--TG--A-AA-GC--C-C-CG-G-G-----CT-C-AA-----C-C-C-G-G-G-A--A-G---T-G--C-A--T--C-----T--GA-T-A--C-----T--G-C--GT--A-G-C---T-T-G-A-G-T-A--C-CG---AA-G-A-----G-G-A-T--AG-T-----GG--A--ATT---C-C-A-G-<br>GT--GT-A-G-TG-GT--G---A--A-A---TA-C-GT-AG--AT-A-TC--T-G--G-A-G-G-A-AC-A-CC---GG--T--G--GC-GAA-G--G-C--G-----G--C-T-A-T---CTG--G--TC-G-A-----G-T---A-C-T--GA--CA-C-T-G--A-GA--C-A-CG-A--AA-G-C---A-TG--GG-G--AT-C-<br>A-AA-----CA--GG                       |   |   |   |   |   |   |   |   |   |   |   |   |   |   |   |   |   |   |    |   |   |   |   |   |   |   |  |
|                                              |   | Bacteria(100);Proteobacteria(100);unclassified(100);unclassified(100);unclassified(100);unclassified(100);unclassified(100);unclassified(100);unclassified(100);                                                                                                                                                                                                                                                                                                                                                                                                                                                              |   |   |   |   |   |   |   |   |   |   |   |   |   |   |   |   |   |   |    |   |   |   |   |   |   |   |  |
| Otu1444                                      | 0 | 0                                                                                                                                                                                                                                                                                                                                                                                                                                                                                                                                                                                                                             | 0 | 0 | 0 | 0 | 0 | 0 | 0 | 0 | 0 | 0 | 0 | 0 | 0 | 0 | 0 | 0 | 0 | 0 | 0  | 0 | 0 | 0 | 0 | 0 | 0 |   |  |
|                                              | 0 | 0                                                                                                                                                                                                                                                                                                                                                                                                                                                                                                                                                                                                                             | 0 | 0 | 0 | 0 | 0 | 0 | 0 | 0 | 0 | 0 | 0 | 0 | 0 | 0 | 0 | 0 | 0 | 0 | 9  | 0 | 0 | 0 | 0 | 0 | 0 |   |  |
|                                              | 0 | 0                                                                                                                                                                                                                                                                                                                                                                                                                                                                                                                                                                                                                             | 0 | 0 | 0 | 0 | 0 | 0 | 0 | 0 | 0 | 0 | 0 | 0 | 0 | 0 | 0 | 0 | 0 | 0 | 0  | 0 | 0 | 0 | 0 | 0 | 0 |   |  |
|                                              | 0 | 0                                                                                                                                                                                                                                                                                                                                                                                                                                                                                                                                                                                                                             | 0 | 0 | 0 | 0 | 0 | 0 | 0 | 0 | 0 | 0 | 0 | 0 | 0 | 0 | 0 | 0 | 0 | 0 | 0  | 0 | 0 | 0 | 0 | 0 |   |   |  |
| M02255_76_000000000-ADUNE_1_1117_13467_12684 |   | T---AA---CT-A--CGT-----GCC-A-G-----C--A--G---C--CG-C-GGT-AA-----TA-C--G-T--AG-GG-----CG--C-----GA-GC-G--TT-----G-TC-C-G---G-----A--T-TT-A-T-T-----<br>--GG---G-C-C-T-----G-T-C--G--TG--T-AA-TC--C-T-CT-G-G-----CT-T-AA-----C-T-G-G-G-G-G--T-G---T-G--C-G---G--T-----G--GG-T-A--C-----G--G-G--CA--G-G-C---T-T-G-A-G-T--G---C-GG---TA-G-G-----G-G-A-G---AT-T-----GG--A--ATT---C-C-<br>T-G-GT--GT-A-G-CG-GT--G---G--A-A---TG-C-GC-AG--AT-A-TC--A-G--G-A-G-G-A-AC-A-CC---GG--T--G--GC-GAA-G--G-C--G-----G--G-T-C-T---CTG--G--GC-C-G-----T-T---A-C-T--GA--CG-C-T-G--A-GG--A-G-CG-A--AA-G-C---G-TG--GG-G--<br>AG-C-G-AA-----CA--GG  |   |   |   |   |   |   |   |   |   |   |   |   |   |   |   |   |   |   |    |   |   |   |   |   |   |   |  |
|                                              |   | Bacteria(100);Actinobacteria(100);Actinobacteria(100);Actinobacteridae(100);Actinomycetales(100);unclassified(100);unclassified(100);unclassified(100);unclassified(100);                                                                                                                                                                                                                                                                                                                                                                                                                                                     |   |   |   |   |   |   |   |   |   |   |   |   |   |   |   |   |   |   |    |   |   |   |   |   |   |   |  |



Otu1445      0      0      0      0      0      0      0      0      0      0      0      0      0      0      0      0      0      0      0      0      0      0      0      0      0      0      0  
             0      0      0      0      0      0      0      0      0      0      0      0      0      0      0      11      0      0      0      0      0      0      0      0      0      0      0  
             0      0      0      0      0      0      0      0      0      0      0      0      0      0      0      0      0      0      0      0      0      0      0      0      0      0      0  
             0      0      0      0      0      0      0      0      0      0      0      0      0      0      0      0      0      0      0      0      0      0      0      0      0  
             M02255\_76\_000000000-ADUNE\_1\_1111\_3260\_12175 T---AC---GT-AG-GGG-----GCA-A-G-----C--G--T---T--AT-C-CGG-AT-----TT-A--C-T--GG-GT-----GT--A-----AA-G-G--G-----G---G--C-----G----T-A-T-A-----AA---G-  
T-C-T-----G-A-A--G--TG--A-AA-AC--C-C-GC-A-G-----CT-C-AA-----C-T-G-C-G-G-A--G-T---T-G--C-T---T--T-----G--GA-A-A---C-----T--T-A--TA--A-G-C---T-G-G-A-G-T--G---T-CG----GA-G-G-----G-G-T-A--AG-C-----GG--A--ATT---C-C-C-A-GT--  
GT-A-G-CG-GT--G---A--A---TG-C-GT-AG--AT-A-TT--G-G--G-A-G-G-A-AC-A-CC---GG--A--G--GC-GAA-G--G-C--G-----G--C-T-T-A---CTG--G--AA-G-A-----T-A--A-C-T--GA--CG-T-T-G--A-GG--C-T-CG-A--AG-G-C--G-TG--GG-T--AG-C-A-  
AA-----CA--GG      Bacteria(100);Firmicutes(100);Clostridia(100);Clostridiales(100);unclassified(100);unclassified(100);unclassified(100);unclassified(100);unclassified(100);

Otu1446      0      0      0      0      0      0      0      0      0      0      0      0      0      0      0      0      0      0      0      0      0      0      0      0      0      0      0  
             0      0      0      0      0      0      0      0      0      0      0      0      0      0      0      4      0      0      0      0      0      0      0      0      0      0      0  
             0      0      0      0      0      0      0      0      0      0      0      0      0      0      0      0      0      11      0      0      0      0      0      0      0      0      21      0  
             0      0      0      0      0      5      0      0      0      0      0      0      0      0      0      36      0      0      0      0      0      0      0      0      0      0      0  
             M02255\_76\_000000000-ADUNE\_1\_2101\_14357\_8337 C---TA---AC-TC-CGT-----GCC-A-G-----C--A--G---C--CG-C-GGT-AA-----TA-C--G-G--AG-GG-----TG--C-----AA-GC-GT--T-----A-TC-C-G--G-----A--C-TT-A-T-T-----AA---  
G-T-C-A-----G-T-G--G--TG--A-AA-TC--T-C-AT-A-G-----CT-C-AA-----C-T-A-T-G-A-A--A-C---T-G--C-C---A--T-----T--GA-T-A---C-----T--G-A--TA--G-T-C---T-T-G-A-G-T--A---T-AT-----TT-G-A-----A-G-T-A--GC-T-----GG--A--ATA---A-G-T-A-GT--  
GT-A-G-CG-GT--G---A--A---TG-C-AT-AG--AT-A-TT--A-C--T-T-A-G-A-AC-A-CC---AA--T--A--GC-GAA-G--G-C--A-----G--G-T-T-A---CTA--A--GA-T-A-----T-T--A-C-T--GA--CG-C-T-G--A-GG--G-A-CG-A--GA-G-C--G-TA--GG-G--AG-C-G-  
AA-----CA--GG      Bacteria(100);Bacteroidetes(100);Flavobacteria(100);Flavobacteriales(100);Flavobacteriaceae(100);unclassified(100);unclassified(100);unclassified(100);unclassified(100);

Otu1447      0      0      0      0      0      0      0      0      0      0      0      0      0      0      0      0      0      0      0      0      0      0      0      0      0      0      0  
             0      0      0      0      0      0      0      0      0      0      0      0      0      0      0      9      0      0      0      0      0      0      0      0      0      0      0  
             0      0      0      0      0      0      0      0      0      0      0      0      0      0      0      0      0      0      0      0      0      0      0      0      0      0      0  
             0      0      0      0      0      0      0      0      0      0      0      0      0      0      0      0      0      0      0      0      0      0      0      0      0      0      0  
             M02255\_76\_000000000-ADUNE\_1\_2104\_23038\_9753 C---GG---CT-AA-TTC-----CGT-G-C-----C--A--G---C--AG-C-CGC-GG-----TA-A--T-A--CG-GA-----AG--G-----TC-CA-GG-CG-----T-TA-T-C-C-G-----G--A-CT-G-T-T-----AT--  
--G-T-C-A-----G-C-G--G--TT--A-AA-GA--G-T-GT-G-G-----CT-C-AA-----C-C-A-T-G-C---G-A---T-G--C-C---G--T-----T--GA-A-A---C-----T--G-G--TG--G-T-C---T-T-G-A-G-T--G---C-AC-----AC-A-G-----G-G-A-T--GC-T-----GG--A--ACT---C-G-T-G-  
GT--GT-A-G-CG-GT--G---A--A---TG-C-TT-AG--AT-A-TC--A-C--G-A-T-G-A-AC-T-CC--GA--T--C--GC-GAA-G--G-C--A-----G--G-T-G-T---CCG--G--GG-T-G-----T-A--A-C-T--GA--CG-C-T-G--A-GG--C-T-CG-A--AA-G-T--G-TG--GG-T--AT-C-  
A-AA-----CA--GG      Bacteria(100);Bacteroidetes(100);unclassified(100);unclassified(100);unclassified(100);unclassified(100);unclassified(100);unclassified(100);unclassified(100);

Otu1448      0      0      0      0      0      0      0      0      0      0      0      0      0      0      0      0      0      0      0      0      0      0      0      0      0      0      0  
             0      0      0      0      0      0      0      0      0      0      0      0      0      0      0      32      0      0      0      0      0      0      0      0      0      0      0  
             0      0      0      0      0      0      0      0      0      0      0      0      0      0      0      0      0      0      0      0      0      0      0      0      0      0      0  
             0      0      0      0      0      0      0      0      0      0      0      0      0      0      0      0      0      0      0      0      0      0      0      0      0      0      0  
             M02255\_77\_000000000-ADUT3\_1\_1109\_9123\_12671 G---AC---GG-AG-GAG-----GCT-A-G-----C--G--T---T--GT-T-CTG-AA-----TT-A--C-T--GG-GC-----GT--A-----AA-GC-GT-AC-----G-CA-G-G-T-G-----G--C-GA-G-A-C-----  
AA---G-T-C-G-----G-A-T--G--TG--A-AA-GC--C-C-GG-G-G-----CT-C-AA-----C-C-C-C-G-G-A--T-G---T-G--C-A---T--C-----C--GA-T-A---C-----T--G-T--TT--T-G-C---T-G-G-A-G-T--C---C-GG-----AA-G-A-----G-G-A-G--AG-C-----GG--A--ATT---C-C-C-  
A-GT--GT-A-G-AG-GT--G---A--A---TT-C-GT-AG--AT-A-TT--G-G--G-A-A-G-A-AC-A-CC---GG--T--G--GC-GAA-G--G-C--G-----G--C-T-C-T---CTG--G--TC-C-G-----G-T--A-C-T--GA--CA-C-T-C--A-AG--T-A-CG-A--AA-G-C---G-TG--GG-G--AG-  
C-A-AA-----CA--GG      Bacteria(100);Proteobacteria(100);unclassified(100);unclassified(100);unclassified(100);unclassified(100);unclassified(100);unclassified(100);unclassified(100);

Otu1449      0      0      0      0      0      0      0      0      0      0      0      0      0      0      0      0      0      0      0      0      0      0      0      0      0      0      0  
             0      0      0      0      0      0      0      0      0      0      0      0      0      0      0      17      0      0      0      0      0      0      0      0      0      0      0  
             0      0      0      0      0      0      0      0      0      0      0      0      0      0      0      0      0      0      0      0      0      0      0      0      0      0      0  
             0      0      0      0      0      0      0      0      0      0      0      0      0      0      0      0      0      0      0      0      0      0      0      0      0      0      0  
             M02255\_77\_000000000-ADUT3\_1\_1112\_12425\_11233                T---AC---GA-AG-GGG-----GCT-A-G-----C--G--T---T--GC-T-CGG-AA-----TT-A--C-T--GG-GC-----GT--A-----AA-GG-GC-GC-----G-TA-G-G-C-G-----G--C-CA-G-A-T---  
-----TA---G-T-C-A-----G-G-C--G--TG--A-AA-TT--C-C-TG-G-G-----CT-C-AA-----C-C-T-G-G-G-G--A-C---T-G--C-G---C--T-----T--GA-T-A---C-----G--G-T--TT--G-G-C---T-T-G-A-G-G--G---C-AG-----GA-G-A-----G-G-C-T---CG-C-----GG--A--ATT---  
C-C-C-A-GT--GT-A-G-AG-GT--G---A--A---TT-C-GT-AG--AT-A-TT--G-G--G-A-A-G-A-AC-A-CC---GG--T--G--GC-GAA-G--G-C--G-----G--C-G-A-G---CTG--G--CC-T-G-----T-T--A-C-T--GA--CG-C-T-G--A-GG--C-G-CG-A--CA-G-C---G-TG--  
GG-G--AG-C-A-AA-----CA--GG      Bacteria(100);Proteobacteria(100);Alphaproteobacteria(100);Rhodospirillales(100);Acetobacteraceae(100);unclassified(100);unclassified(100);unclassified(100);unclassified(100);



|                                              |   |   |   |   |   |   |   |   |   |                                                                                                                                                                                                                          |   |   |   |   |   |    |   |   |   |    |   |   |   |   |   |   |    |
|----------------------------------------------|---|---|---|---|---|---|---|---|---|--------------------------------------------------------------------------------------------------------------------------------------------------------------------------------------------------------------------------|---|---|---|---|---|----|---|---|---|----|---|---|---|---|---|---|----|
| Otu1450                                      | 0 | 0 | 0 | 0 | 0 | 0 | 0 | 0 | 0 | 0                                                                                                                                                                                                                        | 0 | 0 | 0 | 0 | 0 | 0  | 0 | 0 | 0 | 0  | 0 | 0 | 0 | 0 | 0 | 0 | 0  |
|                                              | 0 | 0 | 0 | 0 | 0 | 0 | 0 | 0 | 0 | 0                                                                                                                                                                                                                        | 0 | 0 | 0 | 0 | 0 | 29 | 0 | 0 | 0 | 0  | 0 | 0 | 0 | 0 | 0 | 0 | 0  |
|                                              | 0 | 0 | 0 | 0 | 0 | 0 | 0 | 0 | 0 | 0                                                                                                                                                                                                                        | 0 | 0 | 0 | 0 | 0 | 0  | 0 | 0 | 0 | 0  | 0 | 0 | 0 | 0 | 0 | 0 | 0  |
|                                              | 0 | 0 | 0 | 0 | 0 | 0 | 0 | 0 | 0 | 0                                                                                                                                                                                                                        | 0 | 0 | 0 | 0 | 0 | 0  | 0 | 0 | 0 | 0  | 0 | 0 | 0 | 0 | 0 |   |    |
| M02255_77_000000000-ADUT3_1_1113_13666_15503 |   |   |   |   |   |   |   |   |   | C---AC---GT-AG-GGG-----GCA-A-G-----C-G--T--T--GT-C-CGG-AT-----TT-A--T-T--GG-GC-----GT--A----AA-GA-GC-TC-----G-TA-G-G-T-G-----G--C-TC-G-G-T-----                                                                          |   |   |   |   |   |    |   |   |   |    |   |   |   |   |   |   |    |
|                                              |   |   |   |   |   |   |   |   |   | -----AA---G-T-C-G-----G-G-T--G--TG--A-AA-TT--T-C-GA-G-G----CT-C-AA-----C-C-TCG-A-G-A-----C-G-CC-A--C-C-----T--GA-T-A--C-----T--G-C--TG-TG-G-C---T-A-G-A-G-T--C--C-GG-----TA-G-G-----G-G-A-G--CG-T-----GG--A--ATT----     |   |   |   |   |   |    |   |   |   |    |   |   |   |   |   |   |    |
|                                              |   |   |   |   |   |   |   |   |   | C-C-T-G-GT--GT-A-G-CG-GT--G---A--A---TG-C-GC-AG--AT-A-TC--A-G--G-A-G-G-A-AC-A-CC---AG--C--G--GC-GAA-G--G-C-G-----G--C-G-C-T--CTG--G--GC-C-G-----G-T---A-C-T--GA--CA-C-T-G--A-GG--A-G-CG-A--AA-G-C---G-TG--               |   |   |   |   |   |    |   |   |   |    |   |   |   |   |   |   |    |
|                                              |   |   |   |   |   |   |   |   |   | GG-G--AT-C-A-AA-----CA--GG Bacteria(100);Actinobacteria(100);Actinobacteria(100);Acidimicrobiae(100);Acidimicrobiales(100);Acidimicrobinae(100);unclassified(100);unclassified(100);unclassified(100);                   |   |   |   |   |   |    |   |   |   |    |   |   |   |   |   |   |    |
| Otu1451                                      | 0 | 0 | 0 | 0 | 0 | 0 | 0 | 0 | 0 | 0                                                                                                                                                                                                                        | 0 | 0 | 0 | 0 | 0 | 0  | 0 | 0 | 0 | 0  | 0 | 0 | 0 | 0 | 0 | 0 | 0  |
|                                              | 0 | 0 | 0 | 0 | 0 | 0 | 0 | 0 | 0 | 0                                                                                                                                                                                                                        | 0 | 0 | 0 | 0 | 0 | 28 | 0 | 0 | 0 | 0  | 0 | 0 | 0 | 0 | 0 | 0 | 0  |
|                                              | 0 | 0 | 0 | 0 | 0 | 0 | 0 | 0 | 0 | 0                                                                                                                                                                                                                        | 0 | 0 | 0 | 0 | 0 | 0  | 0 | 0 | 0 | 0  | 0 | 0 | 0 | 0 | 0 | 0 | 0  |
|                                              | 0 | 0 | 0 | 0 | 0 | 0 | 0 | 0 | 0 | 0                                                                                                                                                                                                                        | 0 | 0 | 0 | 0 | 0 | 0  | 0 | 0 | 0 | 0  | 0 | 0 | 0 | 0 | 0 | 0 | 0  |
| M02255_77_000000000-ADUT3_1_2116_14262_23204 |   |   |   |   |   |   |   |   |   | T---AC---GT-AG-GTG-----GCG-A-G-----C-G--T--T--AT-C-CGG-AT-----TT-A--C-T--GG-GT-----GT--A----AA-GG-GC-GT-----G-TA-G-G-C-G-----G--T-CT-T-G-T-----                                                                          |   |   |   |   |   |    |   |   |   |    |   |   |   |   |   |   |    |
|                                              |   |   |   |   |   |   |   |   |   | -----AA---G-T-C-A-----A-A-T--G--TG--A-AA-TC--T-C-CC-G-G----CT-C-AA-----C-T-G-G-G-A-G--T-G---T-G--C-A--T--C-----T--GA-A-A--C-----T--A-T--GG--G-A-C---T-T-G-A-G-T--A--C-TG---GA-G-G-----G-G-A-A--AG-C-----GG--A--ATT---C-  |   |   |   |   |   |    |   |   |   |    |   |   |   |   |   |   |    |
|                                              |   |   |   |   |   |   |   |   |   | C-T-A-GT--GT-A-G-CG-GT--A---A--A---TG-C-GT-AG--AG-A-TT--A-G--G-A-G-G-A-AC-A-CC---GG--T--G--GC-GAA-G--G-C-G-----G--C-T-T-T--CTG--G--AC-A-G-----T-A---A-C-T--GA--CG-C-T-G--A-GG--C-G-CG-A--AA-G-C---G-TG--GG-              |   |   |   |   |   |    |   |   |   |    |   |   |   |   |   |   |    |
|                                              |   |   |   |   |   |   |   |   |   | G--AG-A-A-AA-----CA--GG Bacteria(100);Firmicutes(100);Clostridia(100);unclassified(100);unclassified(100);unclassified(100);unclassified(100);unclassified(100);unclassified(100);                                       |   |   |   |   |   |    |   |   |   |    |   |   |   |   |   |   |    |
| Otu1452                                      | 0 | 0 | 0 | 0 | 0 | 0 | 0 | 0 | 0 | 0                                                                                                                                                                                                                        | 0 | 0 | 0 | 0 | 0 | 0  | 0 | 0 | 0 | 0  | 0 | 0 | 0 | 0 | 0 | 0 | 0  |
|                                              | 0 | 0 | 0 | 0 | 0 | 0 | 0 | 0 | 0 | 0                                                                                                                                                                                                                        | 0 | 0 | 0 | 0 | 0 | 10 | 0 | 0 | 0 | 0  | 0 | 0 | 0 | 0 | 0 | 0 | 0  |
|                                              | 0 | 0 | 0 | 0 | 0 | 0 | 0 | 0 | 0 | 0                                                                                                                                                                                                                        | 0 | 0 | 0 | 0 | 0 | 0  | 0 | 0 | 0 | 0  | 0 | 0 | 0 | 0 | 0 | 0 | 0  |
|                                              | 0 | 0 | 0 | 0 | 0 | 0 | 0 | 0 | 0 | 0                                                                                                                                                                                                                        | 0 | 0 | 0 | 0 | 0 | 0  | 0 | 0 | 0 | 0  | 0 | 0 | 0 | 0 | 0 |   |    |
| M02255_77_000000000-ADUT3_1_1105_6094_3047   |   |   |   |   |   |   |   |   |   | T---AC---GG-GG-GGA-----GC--AAG-----C-G--T--T--GT-T-CGG-AT-----TT-A-----C-----T-----G-G--GC-----G-G-C-----C-AC-C-G-C-----AA---G-T-C-                                                                                      |   |   |   |   |   |    |   |   |   |    |   |   |   |   |   |   |    |
|                                              |   |   |   |   |   |   |   |   |   | G-----A-C-T--G--TG--A-AA-TC--T-C-CG-G-G----CT-T-AA-----C-C-C-G-G-A-A--A-G---G-T--C-A--G--C-----C--GA-T-A--C-----T--G-C--GG--G-G-C---T-A-G-A-G-T--G---C-AG-----AA-G-G-----G-G-C-A--AC-T-----GG--A--ATT---C-T-C-G-GT--GT-  |   |   |   |   |   |    |   |   |   |    |   |   |   |   |   |   |    |
|                                              |   |   |   |   |   |   |   |   |   | A-G-CG-GT--G---A--A---TG-C-GT-AG--AT-A-TC--G-A--G-A-G-G-A-AC-A-CC---TG--C--G--GC-GAA-G--G-C-G-----G--G-T-T-G---CTG--G--GC-T-G-----A-C---A-C-T--GA--CG-C-T-G--A-GG--C-G-CG-A--AA-G-C---T-AG--GG-G--AG-C-G-AA--            |   |   |   |   |   |    |   |   |   |    |   |   |   |   |   |   |    |
|                                              |   |   |   |   |   |   |   |   |   | -----CG--GG Bacteria(100);Acidobacteria(100);Acidobacteria(100);Acidobacteriales(100);Acidobacteriaceae(100);uncultured(100);unclassified(100);unclassified(100);unclassified(100);                                      |   |   |   |   |   |    |   |   |   |    |   |   |   |   |   |   |    |
| Otu1453                                      | 0 | 0 | 0 | 0 | 0 | 0 | 0 | 0 | 0 | 0                                                                                                                                                                                                                        | 0 | 0 | 0 | 0 | 0 | 0  | 0 | 0 | 0 | 0  | 0 | 0 | 0 | 0 | 0 | 0 | 0  |
|                                              | 0 | 0 | 0 | 0 | 0 | 0 | 0 | 0 | 0 | 0                                                                                                                                                                                                                        | 0 | 0 | 0 | 0 | 0 | 7  | 0 | 0 | 0 | 0  | 0 | 0 | 0 | 0 | 0 | 0 | 70 |
|                                              | 0 | 0 | 0 | 0 | 0 | 0 | 0 | 0 | 0 | 0                                                                                                                                                                                                                        | 0 | 0 | 0 | 0 | 0 | 0  | 0 | 0 | 0 | 0  | 0 | 0 | 0 | 0 | 0 | 0 | 0  |
|                                              | 0 | 0 | 0 | 0 | 0 | 0 | 0 | 0 | 0 | 0                                                                                                                                                                                                                        | 0 | 0 | 0 | 0 | 0 | 0  | 0 | 0 | 0 | 0  | 0 | 0 | 0 | 0 | 0 |   |    |
| M02255_77_000000000-ADUT3_1_1116_12972_14521 |   |   |   |   |   |   |   |   |   | T---AC---AG-AG-GGG-----GCA-A-G-----C-G--T--T--GT-C-CGG-AA-----TT-A--C-T--GG-GC-----GT--A----CA-GC-GC-GC-----G-CA-G-G-C-G-----G--A-CC-G-C-C----                                                                           |   |   |   |   |   |    |   |   |   |    |   |   |   |   |   |   |    |
|                                              |   |   |   |   |   |   |   |   |   | -----AC---G-T-G-C-----C-G-T--G--TG--A-CA-AG--C-C-AC-T-G----CT-C-AA-----C-A-G-T-G-G-A--G-G---G-C--C-A--T--G-----G--TA-C-A--C-----G--A-G--CA--G-T-C---T-G-G-A-G-G--C---A-GG-----GA-G-A-----G-G-G-A--TG-T-----GG--A--ATG--- |   |   |   |   |   |    |   |   |   |    |   |   |   |   |   |   |    |
|                                              |   |   |   |   |   |   |   |   |   | -C-C-C-G-GT--GG-A-G-CG-GT--G---A--A---TG-C-GT-AG--AG-A-TC--G-G--G-C-G-G-A-AC-A-CC---AG--C--G--GC-GAA-G--G-C-G-----G--C-A-T-C---CTG--G--TC-C-T-----G-T---T-C-T--GA--CG-C-T-G--A-GG--C-G-CG-A--GA-G-C---G-TG--             |   |   |   |   |   |    |   |   |   |    |   |   |   |   |   |   |    |
|                                              |   |   |   |   |   |   |   |   |   | GG-G--AG-C-A-AA-----CT--GG Bacteria(100);unclassified(100);unclassified(100);unclassified(100);unclassified(100);unclassified(100);unclassified(100);unclassified(100);                                                  |   |   |   |   |   |    |   |   |   |    |   |   |   |   |   |   |    |
| Otu1454                                      | 0 | 0 | 0 | 0 | 0 | 0 | 0 | 0 | 0 | 0                                                                                                                                                                                                                        | 0 | 0 | 0 | 0 | 0 | 0  | 0 | 0 | 0 | 0  | 0 | 0 | 0 | 0 | 0 | 0 | 0  |
|                                              | 0 | 0 | 0 | 0 | 0 | 0 | 0 | 0 | 0 | 0                                                                                                                                                                                                                        | 0 | 0 | 0 | 0 | 0 | 0  | 0 | 0 | 0 | 20 | 0 | 0 | 0 | 0 | 0 | 0 | 0  |
|                                              | 0 | 0 | 0 | 0 | 0 | 0 | 0 | 0 | 0 | 0                                                                                                                                                                                                                        | 0 | 0 | 0 | 0 | 0 | 0  | 0 | 0 | 0 | 0  | 0 | 0 | 0 | 0 | 0 | 0 | 0  |
|                                              | 0 | 0 | 0 | 0 | 0 | 0 | 0 | 0 | 0 | 0                                                                                                                                                                                                                        | 0 | 0 | 0 | 0 | 0 | 0  | 0 | 0 | 0 | 0  | 0 | 0 | 0 | 0 | 0 |   |    |
| M02255_76_000000000-ADUNE_1_1117_7565_20411  |   |   |   |   |   |   |   |   |   | C---AC---GT-AG-GGG-----GCA-A-G-----C-G--T--T--GT-C-CGG-AT-----TT-A--T-T--GG-GC-----GT-----AA--A-----G--A-----G--C-TC-G-G-T-----AG----G-T-                                                                                |   |   |   |   |   |    |   |   |   |    |   |   |   |   |   |   |    |
|                                              |   |   |   |   |   |   |   |   |   | C-A-----G-G-T--G--TG--A-AA-CC--C-T-CG-G-G----CT-C-AA-----C-C-C-G-G-G-GA-----C-G-CC-A--C-C-----T--GA-T-A--C-----T--G-C--CA-TG-G-C---T-T-G-A-G-T--C---C-GG-----TA-G-G-----G-G-A-G---CG-T-----GG--A--ATT---C-C-T-G-GT--     |   |   |   |   |   |    |   |   |   |    |   |   |   |   |   |   |    |
|                                              |   |   |   |   |   |   |   |   |   | GT-A-G-CG-GT--G---A--A---TG-C-GC-AG--AT-A-TC--A-G--G-A-G-G-A-AC-A-CC---AG--C--G--GC-GAA-G--G-C-G-----G--C-G-C-T--CTG--G--GC-C-G-----G-A---A-C-T--GA--CG-C-T-G--A-GG--A-G-CG-A--AA-G-C---G-TG--GG-G--AG-C-A-              |   |   |   |   |   |    |   |   |   |    |   |   |   |   |   |   |    |
|                                              |   |   |   |   |   |   |   |   |   | AA-----CA--GG Bacteria(100);Actinobacteria(100);Actinobacteria(100);Acidimicrobiae(100);Acidimicrobiales(100);Acidimicrobinae(100);unclassified(100);unclassified(100);unclassified(100);                                |   |   |   |   |   |    |   |   |   |    |   |   |   |   |   |   |    |



|                                                                                                                                                                                                                                |   |   |   |   |   |   |   |   |   |   |   |   |   |   |   |   |   |   |     |   |   |   |   |   |   |   |   |
|--------------------------------------------------------------------------------------------------------------------------------------------------------------------------------------------------------------------------------|---|---|---|---|---|---|---|---|---|---|---|---|---|---|---|---|---|---|-----|---|---|---|---|---|---|---|---|
| Otu1455                                                                                                                                                                                                                        | 0 | 0 | 0 | 0 | 0 | 0 | 0 | 0 | 0 | 0 | 0 | 0 | 0 | 0 | 0 | 0 | 0 | 0 | 0   | 0 | 0 | 0 | 0 | 0 | 0 | 0 | 0 |
|                                                                                                                                                                                                                                | 0 | 0 | 0 | 0 | 0 | 0 | 0 | 0 | 0 | 0 | 0 | 0 | 0 | 0 | 0 | 0 | 0 | 9 | 0   | 0 | 0 | 0 | 0 | 0 | 0 | 0 | 0 |
|                                                                                                                                                                                                                                | 0 | 0 | 0 | 0 | 0 | 0 | 0 | 0 | 0 | 0 | 0 | 0 | 0 | 0 | 0 | 0 | 0 | 0 | 0   | 0 | 0 | 0 | 0 | 0 | 0 | 0 | 0 |
|                                                                                                                                                                                                                                | 0 | 0 | 0 | 0 | 0 | 0 | 0 | 0 | 0 | 0 | 0 | 0 | 0 | 0 | 0 | 0 | 0 | 0 | 0   | 0 | 0 | 0 | 0 | 0 | 0 |   |   |
| M02255_77_000000000-ADUT3_1_1110_24998_8949 T---AC---GT-AG-GCA-----GCA-A-G-----C-G--T---T--GT-T-CGG-AA-----TT-A--C-T--GG-GC-----GT--A----AA-GG-GT-GC-----G-TA-G-G-C-G-----G--C-TT-T-T-T-----AA--                               |   |   |   |   |   |   |   |   |   |   |   |   |   |   |   |   |   |   |     |   |   |   |   |   |   |   |   |
| --G-T-T-T-----G-T-C--G--TG--A-AA-TC--T-C-CC-G-G-----CT-C-AA-----C-C-G-G-G-A-G--G-G---T-G--C-G--G-C-----G--AA-T-A--C-----T--G-A-GA-A-G-C---T-A-G-A-G-T--G---T-GG-----GA-G-A-----G-G-A-A--AG-T-----GG--A--ATT---C-C-T-G-         |   |   |   |   |   |   |   |   |   |   |   |   |   |   |   |   |   |   |     |   |   |   |   |   |   |   |   |
| GT--GT-A-G-CG-GT--G---A--A---TG-C-GT-AG--AT-A-TC--A-G--G-A-G-G-A-AC-A-CC---GG--T--G--GT-GTA-A--A-C--G-----G--C-T-T-T---CTG--G--AC-C-A-----T-A--A-C-T--GA--CG-C-T-G--A-GG--C-A-CG-A--AA-G-C---G-TG--GG-T--AG-C-                 |   |   |   |   |   |   |   |   |   |   |   |   |   |   |   |   |   |   |     |   |   |   |   |   |   |   |   |
| A-AA-----CA--GG Bacteria(100);Acidobacteria(100);Acidobacteria(100);Acidobacteriales(100);Acidobacteriaceae(100);Candidatus_Solibacter(100);unclassified(100);unclassified(100);unclassified(100);                             |   |   |   |   |   |   |   |   |   |   |   |   |   |   |   |   |   |   |     |   |   |   |   |   |   |   |   |
| Otu1456                                                                                                                                                                                                                        | 0 | 0 | 0 | 0 | 0 | 0 | 0 | 0 | 0 | 0 | 0 | 0 | 0 | 0 | 0 | 0 | 0 | 0 | 0   | 0 | 0 | 0 | 0 | 0 | 0 | 0 | 0 |
|                                                                                                                                                                                                                                | 0 | 0 | 0 | 0 | 0 | 0 | 0 | 0 | 0 | 0 | 0 | 0 | 0 | 0 | 0 | 0 | 0 | 3 | 0   | 0 | 0 | 0 | 0 | 0 | 0 | 0 | 0 |
|                                                                                                                                                                                                                                | 0 | 0 | 0 | 0 | 0 | 0 | 0 | 0 | 0 | 0 | 0 | 0 | 0 | 0 | 0 | 0 | 0 | 0 | 0   | 0 | 0 | 0 | 0 | 0 | 0 | 0 | 0 |
|                                                                                                                                                                                                                                | 0 | 0 | 0 | 0 | 0 | 0 | 0 | 0 | 0 | 0 | 0 | 0 | 0 | 0 | 0 | 0 | 0 | 0 | 0   | 0 | 0 | 0 | 0 | 0 | 0 |   |   |
| M02255_77_000000000-ADUT3_1_2102_9988_18372 T---AC---GG-AG-GAT-----GCA-A-G-----C-G--T---T--AT-C-CGG-AA-----TG-A--T-T--GG-GC-----GT--A----AA-GC-GT-CC-----G-CA-G-G-T-G-----G--C-AG-T-G-T-----                                   |   |   |   |   |   |   |   |   |   |   |   |   |   |   |   |   |   |   |     |   |   |   |   |   |   |   |   |
| AA---G-T-C-T-----G-C-T--G--TC--A-AA-GG--T-C-AG-G-G-----CT-T-AA-----C-C-C-T-G-A-A-C-A---G-G--C-A--G--T-----G-GA-A-A--C-----T--A-C-AC--A-G-A---T-A-G-A-G-T--G---C-GG-----TG-G-G-----G-G-C-A--GA-G-----GG--A--ATT---C-C-          |   |   |   |   |   |   |   |   |   |   |   |   |   |   |   |   |   |   |     |   |   |   |   |   |   |   |   |
| C-A-GT--GT-A-G-CG-GT--G---A--A---TG-C-GT-AG--AG-A-TT--G-G--G-A-A-G-A-AC-A-CC---GG--T--G--GC-GAA-A--G-C--G-----C--T-C-T-G---CTA--G--GC-C-G-----C-A--A-C-T--GA--CA-C-T-C--A-TG--G-A-CG-A--AA-G-C---T-AG--GG-G--                  |   |   |   |   |   |   |   |   |   |   |   |   |   |   |   |   |   |   |     |   |   |   |   |   |   |   |   |
| AG-C-G-AA-----TG--GG Bacteria(100);Cyanobacteria(100);unclassified(100);unclassified(100);unclassified(100);unclassified(100);unclassified(100);unclassified(100);unclassified(100);                                           |   |   |   |   |   |   |   |   |   |   |   |   |   |   |   |   |   |   |     |   |   |   |   |   |   |   |   |
| Otu1457                                                                                                                                                                                                                        | 0 | 0 | 0 | 0 | 0 | 0 | 0 | 0 | 0 | 0 | 0 | 0 | 0 | 0 | 0 | 0 | 0 | 0 | 0   | 0 | 0 | 0 | 0 | 0 | 0 | 0 | 0 |
|                                                                                                                                                                                                                                | 0 | 0 | 0 | 0 | 0 | 0 | 0 | 0 | 0 | 0 | 0 | 0 | 0 | 0 | 0 | 0 | 0 | 4 | 0   | 0 | 0 | 0 | 0 | 0 | 0 | 0 | 0 |
|                                                                                                                                                                                                                                | 0 | 0 | 0 | 0 | 0 | 0 | 0 | 0 | 0 | 0 | 0 | 0 | 0 | 0 | 0 | 0 | 0 | 0 | 0   | 0 | 0 | 0 | 0 | 0 | 0 | 0 | 0 |
|                                                                                                                                                                                                                                | 0 | 0 | 0 | 0 | 0 | 0 | 0 | 0 | 0 | 0 | 0 | 0 | 0 | 0 | 0 | 0 | 0 | 0 | 0   | 0 | 0 | 0 | 0 | 0 | 0 |   |   |
| M02255_77_000000000-ADUT3_1_2111_25678_12362 T---AC---GG-AG-GGA-----GCT-A-G-----C-G--T---T--GT-T-CGG-AA-----TT-A--C-T--GG-GC-----GT--A----AA-GC-GC-AC-----G-TA-G-G-C-G-----G--C-GA-C-T-C-----                                  |   |   |   |   |   |   |   |   |   |   |   |   |   |   |   |   |   |   |     |   |   |   |   |   |   |   |   |
| -----AA---G-T-C-A-----G-A-G--G--TG--A-AA-GC--C-T-GG-A-G-----CT-C-AA-----C-T-C-C-A-G-A--A-C---T-G--C-C---T--T-----T--GA-A-A--C-----T--A-G-GT--C-G-C---T-A-G-A-A-T--C---T-TG-----GA-G-A-----G-G-C-G--AG-T-----GG--A--ATT---C-C-  |   |   |   |   |   |   |   |   |   |   |   |   |   |   |   |   |   |   |     |   |   |   |   |   |   |   |   |
| C-G-A-GT--GT-A-G-AG-GT--G---A--A---TT-C-GT-AG--AT-A-TT--C-G--G-A-A-G-A-AC-A-CC---AG--T--G--GC-GAA-G--G-C--G-----A--C-T-C-G---CTG--G--AC-A-A-----G-T--A-T-T--GA--CG-C-T-G--A-GG--T-G-CG-A--AA-G-C---G-TG--GG-G--                |   |   |   |   |   |   |   |   |   |   |   |   |   |   |   |   |   |   |     |   |   |   |   |   |   |   |   |
| G--AG-C-A-AA-----CA--GG Bacteria(100);Proteobacteria(100);Alphaproteobacteria(100);Sphingomonadales(100);unclassified(100);unclassified(100);unclassified(100);unclassified(100);unclassified(100);                            |   |   |   |   |   |   |   |   |   |   |   |   |   |   |   |   |   |   |     |   |   |   |   |   |   |   |   |
| Otu1458                                                                                                                                                                                                                        | 0 | 0 | 0 | 0 | 0 | 0 | 0 | 0 | 0 | 0 | 0 | 0 | 0 | 0 | 0 | 0 | 0 | 0 | 0   | 0 | 0 | 0 | 0 | 0 | 0 | 0 | 0 |
|                                                                                                                                                                                                                                | 0 | 0 | 0 | 0 | 0 | 0 | 0 | 0 | 0 | 0 | 0 | 0 | 0 | 0 | 0 | 0 | 0 | 0 | 468 | 0 | 0 | 0 | 0 | 0 | 0 | 0 | 0 |
|                                                                                                                                                                                                                                | 0 | 0 | 0 | 0 | 0 | 0 | 0 | 0 | 0 | 0 | 0 | 0 | 0 | 0 | 0 | 0 | 0 | 0 | 0   | 0 | 0 | 0 | 0 | 0 | 0 | 0 | 0 |
|                                                                                                                                                                                                                                | 0 | 0 | 0 | 0 | 0 | 0 | 0 | 0 | 0 | 0 | 0 | 0 | 0 | 0 | 0 | 0 | 0 | 0 | 0   | 0 | 0 | 0 | 0 | 0 | 0 |   |   |
| M02255_76_000000000-ADUNE_1_1101_16891_16797 C---GG---CT-AA-CTA-----CG-T-G-----C--C--A---G--CA-G-CCG-CG-----GT-A--A-T--AC-GT-----AG--G----GA-GC-GA-GC-----GTTA-T-C-C-G-----G--A-AA-T-A-T-----                                  |   |   |   |   |   |   |   |   |   |   |   |   |   |   |   |   |   |   |     |   |   |   |   |   |   |   |   |
| -----AA---G-T-C-T-----A-A-G--G--TT--T-AA-GC--C-C-GG-A-G-----CT-C-AA-----C-T-C-C-G-G-T--T-----C-G--C-C---T--T-----A--GA-A-A--C-----T--G-T--AT--T-T-C---T-T-G-A-G-T--A---T-GG-----TA-G-A-----G-G-C-A--AG-T-----GG--A--ATT---T-C- |   |   |   |   |   |   |   |   |   |   |   |   |   |   |   |   |   |   |     |   |   |   |   |   |   |   |   |
| T-A-GT--GT-A-G-CG-GT--A---A--A---TG-C-GT-AG--AT-A-TT--A-G--A-A-G-G-A-AC-A-CC---AG--T--G--GC-GAA-G--G-C--G-----A--C-T-T-G---CTG--G--GC-C-A-----T-T--A-C-T--GA--CG-C-T-G--A-GA--C-A-CG-A--AA-G-C---G-TG--GG-G--                  |   |   |   |   |   |   |   |   |   |   |   |   |   |   |   |   |   |   |     |   |   |   |   |   |   |   |   |
| AG-C-A-AA-----TA--GG Bacteria(100);unclassified(100);unclassified(100);unclassified(100);unclassified(100);unclassified(100);unclassified(100);unclassified(100);unclassified(100);                                            |   |   |   |   |   |   |   |   |   |   |   |   |   |   |   |   |   |   |     |   |   |   |   |   |   |   |   |
| Otu1459                                                                                                                                                                                                                        | 0 | 0 | 0 | 0 | 0 | 0 | 0 | 0 | 0 | 0 | 0 | 0 | 0 | 0 | 0 | 0 | 0 | 0 | 0   | 0 | 0 | 0 | 0 | 0 | 0 | 0 | 0 |
|                                                                                                                                                                                                                                | 0 | 0 | 0 | 0 | 0 | 0 | 0 | 0 | 0 | 0 | 0 | 0 | 0 | 0 | 0 | 0 | 0 | 0 | 139 | 0 | 0 | 0 | 0 | 0 | 0 | 0 | 0 |
|                                                                                                                                                                                                                                | 0 | 0 | 0 | 0 | 0 | 0 | 0 | 0 | 0 | 0 | 0 | 0 | 0 | 0 | 0 | 0 | 0 | 0 | 0   | 0 | 0 | 0 | 0 | 0 | 0 | 0 | 0 |
|                                                                                                                                                                                                                                | 0 | 0 | 0 | 0 | 0 | 0 | 0 | 0 | 0 | 0 | 0 | 0 | 0 | 0 | 0 | 0 | 0 | 0 | 0   | 0 | 0 | 0 | 0 | 0 | 0 |   |   |
| M02255_76_000000000-ADUNE_1_1103_9305_8127 T---CG---GC-TA-ACT-----CCG-T-G-----C--C--A---G--CA-G-CCG-CG-----GT-A--A-T--AC-GG-----AG--G----AT-GC-GA-GC-----GTTA-T-C-C-G-----GA-T-TT-A-T-T-----AA-                                |   |   |   |   |   |   |   |   |   |   |   |   |   |   |   |   |   |   |     |   |   |   |   |   |   |   |   |
| ---G-T-C-A-----G-C-G--G--TA--A-AA-TT--T-C-CG-G-G-----CT-C-AA-----C-C-C-G-G---T--C-G---T-G--C-C---G--T-----T--GA-A-A--C-----T--G-G--CA--G-G-C---T-T-G-A-G-T--A---T-GG-----AT-G-A-----A-G-T-G---GG-C-----GG--A--ATT---T-G-T-A-   |   |   |   |   |   |   |   |   |   |   |   |   |   |   |   |   |   |   |     |   |   |   |   |   |   |   |   |
| GT--GT-A-G-CG-GT--G---A--A---TG-C-TT-AG--AT-A-TT--A-C--A-A-G-G-A-AC-T-CC---GA--T--T--GC-GCA-G--G-C--A-----G--C-T-C-A---CTA--A--AC-C-A-----T-A--A-C-T--GA--CG-C-T-G--A-AG--C-A-CG-A--AA-G-C---G-TG--GG-T--AT-C-                 |   |   |   |   |   |   |   |   |   |   |   |   |   |   |   |   |   |   |     |   |   |   |   |   |   |   |   |
| A-AA-----CA--GG Bacteria(100);Bacteroidetes(100);Bacteroidia(100);Bacteroidales(100);Porphyromonadaceae(100);unclassified(100);unclassified(100);unclassified(100);unclassified(100);                                          |   |   |   |   |   |   |   |   |   |   |   |   |   |   |   |   |   |   |     |   |   |   |   |   |   |   |   |



|                                              |      |                                                                                                                                                                                                                                                                                                                                                                                                                                                                                                                                                                                                 |                                                                                                                                                                                  |   |   |   |   |   |   |   |   |   |   |   |   |   |   |   |    |    |   |    |   |   |   |   |
|----------------------------------------------|------|-------------------------------------------------------------------------------------------------------------------------------------------------------------------------------------------------------------------------------------------------------------------------------------------------------------------------------------------------------------------------------------------------------------------------------------------------------------------------------------------------------------------------------------------------------------------------------------------------|----------------------------------------------------------------------------------------------------------------------------------------------------------------------------------|---|---|---|---|---|---|---|---|---|---|---|---|---|---|---|----|----|---|----|---|---|---|---|
| Otu1460                                      | 0    | 0                                                                                                                                                                                                                                                                                                                                                                                                                                                                                                                                                                                               | 0                                                                                                                                                                                | 0 | 0 | 0 | 0 | 0 | 0 | 0 | 0 | 0 | 0 | 0 | 0 | 0 | 0 | 0 | 0  | 0  | 0 | 0  | 0 | 0 | 0 | 0 |
|                                              | 0    | 0                                                                                                                                                                                                                                                                                                                                                                                                                                                                                                                                                                                               | 0                                                                                                                                                                                | 0 | 0 | 0 | 0 | 0 | 0 | 0 | 0 | 0 | 0 | 0 | 0 | 0 | 0 | 0 | 0  | 12 | 0 | 0  | 0 | 0 | 0 | 0 |
|                                              | 0    | 0                                                                                                                                                                                                                                                                                                                                                                                                                                                                                                                                                                                               | 0                                                                                                                                                                                | 0 | 0 | 0 | 0 | 0 | 0 | 0 | 0 | 0 | 0 | 0 | 0 | 0 | 0 | 0 | 0  | 0  | 0 | 0  | 0 | 0 | 0 | 0 |
|                                              | 0    | 0                                                                                                                                                                                                                                                                                                                                                                                                                                                                                                                                                                                               | 0                                                                                                                                                                                | 0 | 0 | 0 | 0 | 0 | 0 | 0 | 0 | 0 | 0 | 0 | 0 | 0 | 0 | 0 | 0  | 0  | 0 | 0  | 0 | 0 | 0 | 0 |
| M02255_76_000000000-ADUNE_1_1103_17910_17046 | G--- | AA--GC-CC-CGG-----CTA-A-C-----T-A-C--G--TG-C-CAG-CA-----GC-C-G-C-GG-TA-----AT--A----CG-TA-GG-GG-----GCGA-GCG-T-T-----G--T-CC-G-G-T-----AA---G-T-C-T-----G-C-C--G--TG--A-AA-AC--C-T-GA-G-G----CT-C-AA-----C-C-T-C-G-G-G--C-G---T-G-C-G--G--T-----G--GA-T-A--C-----T-G-C--CG--G-G-C---T-A-G-A-G-G-A--C-GG----TA-G-A-----G-G-C-G--AG-T-----GG--A--ATT---C-C-C-G-GT--GT-A-G-CG-GT--G---A-A-A---TG-C-GC-AG--AT-A-TC--G-G--G-A-G-G-A-AC-A-CC--AG--T--A--GC-GAA-G--G-C-G-----G--C-T-C-G--CTG--G--GC-C-G-----T-T--C-C-T--GA--CG-C-T-G--A-GA--C-G-CG-A-AA-G-C---T-AG--GG-G--AG-C-G-AA-----CA--GG         | Bacteria(100);Actinobacteria(100);Actinobacteria(100);Rubrobacteridae(100);Rubrobacterales(100);Rubrobacterineae(100);Rubrobacteriaceae(100);Rubrobacter(100);unclassified(100); |   |   |   |   |   |   |   |   |   |   |   |   |   |   |   |    |    |   |    |   |   |   |   |
| Otu1461                                      | 0    | 0                                                                                                                                                                                                                                                                                                                                                                                                                                                                                                                                                                                               | 0                                                                                                                                                                                | 0 | 0 | 0 | 0 | 0 | 0 | 0 | 0 | 0 | 0 | 0 | 0 | 0 | 0 | 0 | 0  | 0  | 0 | 0  | 0 | 0 | 0 | 0 |
|                                              | 0    | 0                                                                                                                                                                                                                                                                                                                                                                                                                                                                                                                                                                                               | 0                                                                                                                                                                                | 0 | 0 | 0 | 0 | 0 | 0 | 0 | 0 | 0 | 0 | 0 | 0 | 0 | 0 | 0 | 40 | 0  | 0 | 0  | 0 | 0 | 0 | 0 |
|                                              | 0    | 0                                                                                                                                                                                                                                                                                                                                                                                                                                                                                                                                                                                               | 0                                                                                                                                                                                | 0 | 0 | 0 | 0 | 0 | 0 | 0 | 0 | 0 | 0 | 0 | 0 | 0 | 0 | 0 | 0  | 0  | 0 | 0  | 0 | 0 | 0 | 0 |
|                                              | 0    | 0                                                                                                                                                                                                                                                                                                                                                                                                                                                                                                                                                                                               | 0                                                                                                                                                                                | 0 | 0 | 0 | 0 | 0 | 0 | 0 | 0 | 0 | 0 | 0 | 0 | 0 | 0 | 0 | 0  | 0  | 0 | 0  | 0 | 0 | 0 | 0 |
| M02255_76_000000000-ADUNE_1_1105_11612_23442 | T--- | CG--GC-TA-ACT-----CCG-T-GC-----C-A-G--C--AG-C-CGC-GG-----TA-A-T-A--CG-GA-----GG--A----TC-CG-AG-CG-----T-TA-T-C-C-G-----G--T-TT-G-A-T-----AA---G-T-C-A-----G-C-G--G--TG--A-AA-GT--T-T-GC-A-G----CT-T-AA-----C-T-G-T-A-A-A--A-A--T-G--C-C--G--T-----T--GA-A-A--C-----T-G-T--CG--G-A-C---T-T-G-A-G-T-G--T-AA----AT-G-A-----G-G-T-A--GG-C-----GG--A--ATG---C-G-T-G-GT--GT-A-G-CG-GT--G---A-A-A---TG-C-AT-AG--AT-A-TC--A-C--G-C-A-G-A-AC-T-CC--GA--T--T--GC-GAA-G--G-C-A-----G--C-T-T-A--CTA--A--GC-T-A-----C-A--A-C-T--GA--CA-C-T-G--A-AG--C-A-CG-A-AA-G-C---G-TG--GG-G--AT-C-A-AA-----CA--GG       | Bacteria(100);Bacteroidetes(100);Bacteroidia(100);Bacteroidales(100);Porphyromonadaceae(100);Parabacteroides(100);unclassified(100);unclassified(100);unclassified(100);         |   |   |   |   |   |   |   |   |   |   |   |   |   |   |   |    |    |   |    |   |   |   |   |
| Otu1462                                      | 0    | 0                                                                                                                                                                                                                                                                                                                                                                                                                                                                                                                                                                                               | 0                                                                                                                                                                                | 0 | 0 | 0 | 0 | 0 | 0 | 0 | 0 | 0 | 0 | 0 | 0 | 0 | 0 | 0 | 0  | 0  | 0 | 0  | 0 | 0 | 0 | 0 |
|                                              | 0    | 0                                                                                                                                                                                                                                                                                                                                                                                                                                                                                                                                                                                               | 0                                                                                                                                                                                | 0 | 0 | 0 | 0 | 0 | 0 | 0 | 0 | 0 | 0 | 0 | 0 | 0 | 0 | 0 | 0  | 0  | 0 | 18 | 0 | 0 | 0 | 0 |
|                                              | 0    | 0                                                                                                                                                                                                                                                                                                                                                                                                                                                                                                                                                                                               | 0                                                                                                                                                                                | 0 | 0 | 0 | 0 | 0 | 0 | 0 | 0 | 0 | 0 | 0 | 0 | 0 | 0 | 0 | 0  | 0  | 0 | 0  | 0 | 0 | 0 | 0 |
|                                              | 0    | 0                                                                                                                                                                                                                                                                                                                                                                                                                                                                                                                                                                                               | 0                                                                                                                                                                                | 0 | 0 | 0 | 0 | 0 | 0 | 0 | 0 | 0 | 0 | 0 | 0 | 0 | 0 | 0 | 0  | 0  | 0 | 0  | 0 | 0 | 0 | 0 |
| M02255_77_000000000-ADUT3_1_2116_13925_12900 | C--- | AC--GT-AG-GGT-----GCA-A-G-----C-G--T---T--GT-C-CGG-AA-----TC-A--T-T--GG-GC-----GT--A----AA-GA-GC-TC-----G-TA-G-G-C-G-----G--C-TT-A-G-T-----AA---G-T-C-G-----G-G-T--G--TG--A-AA-CC--C-C-CA-G-G----CT-C-AA-----C-C-T-G-G-G-GA-----C-G-CC-A--C-C-----C--GA-T-A--C-----T-G-C--TA-TA-G-C---T-A-G-A-G-T-C--C-AG----TA-G-G-----G-G-A-G--TG-C-----GG--A--ATT---C-C-C-G-GT--GT-A-G-CG-GT--G---A-A-A---TG-C-GC-AG--AT-A-TC--A-G--G-A-G-G-A-AC-A-CC--AG--C--G--GC-GAA-G--G-C-G-----G--C-A-C-T--CTG--G--GC-T-G-----G-T--A-C-T--GA--CA-C-T-G--A-AG--A-G-CG-A-AA-G-C---G-TG--GG-G--GG-T--AG-C-G-AA-----CA--GG | Bacteria(100);Actinobacteria(100);Actinobacteria(100);Acidimicrobiidae(100);Acidimicrobiales(100);Acidimicrobineae(100);unclassified(100);unclassified(100);unclassified(100);   |   |   |   |   |   |   |   |   |   |   |   |   |   |   |   |    |    |   |    |   |   |   |   |
| Otu1463                                      | 0    | 0                                                                                                                                                                                                                                                                                                                                                                                                                                                                                                                                                                                               | 0                                                                                                                                                                                | 0 | 0 | 0 | 0 | 0 | 0 | 0 | 0 | 0 | 0 | 0 | 0 | 0 | 0 | 0 | 0  | 0  | 0 | 0  | 0 | 0 | 0 | 0 |
|                                              | 0    | 0                                                                                                                                                                                                                                                                                                                                                                                                                                                                                                                                                                                               | 0                                                                                                                                                                                | 0 | 0 | 0 | 0 | 0 | 0 | 0 | 0 | 0 | 0 | 0 | 0 | 0 | 0 | 0 | 0  | 0  | 0 | 27 | 0 | 0 | 0 | 0 |
|                                              | 0    | 0                                                                                                                                                                                                                                                                                                                                                                                                                                                                                                                                                                                               | 0                                                                                                                                                                                | 0 | 0 | 0 | 0 | 0 | 0 | 0 | 0 | 0 | 0 | 0 | 0 | 0 | 0 | 0 | 0  | 0  | 0 | 0  | 0 | 0 | 0 | 0 |
|                                              | 0    | 0                                                                                                                                                                                                                                                                                                                                                                                                                                                                                                                                                                                               | 0                                                                                                                                                                                | 0 | 0 | 0 | 0 | 0 | 0 | 0 | 0 | 0 | 0 | 0 | 0 | 0 | 0 | 0 | 0  | 0  | 0 | 0  | 0 | 0 | 0 | 0 |
| M02255_77_000000000-ADUT3_1_1110_17089_19834 | T--- | AC--GT-AG-GGT-----CCG-A-G-----C-G--T---T--GT-C-CGG-AT-----TT-A--T-T--GG-GC-----GT--A----AA-GA-GC-TC-----G-TA-G-G-T-G-----G--C-TC-C-G-T-----AA---G-T-C-G-----G-G-T--G--TG--A-AA-AC--C-C-CA-G-G----CT-C-AA-----C-C-T-G-G-G-G--A-----C-G                                                                                                                                                                                                                                                                                                                                                           |                                                                                                                                                                                  |   |   |   |   |   |   |   |   |   |   |   |   |   |   |   |    |    |   |    |   |   |   |   |



|                                                                                                                                                                                                                               |   |   |   |   |   |   |   |   |   |   |   |   |   |   |   |   |   |   |   |   |   |   |    |   |   |   |   |
|-------------------------------------------------------------------------------------------------------------------------------------------------------------------------------------------------------------------------------|---|---|---|---|---|---|---|---|---|---|---|---|---|---|---|---|---|---|---|---|---|---|----|---|---|---|---|
| Otu1465                                                                                                                                                                                                                       | 0 | 0 | 0 | 0 | 0 | 0 | 0 | 0 | 0 | 0 | 0 | 0 | 0 | 0 | 0 | 0 | 0 | 0 | 0 | 0 | 0 | 0 | 0  | 0 | 0 | 0 | 0 |
|                                                                                                                                                                                                                               | 0 | 0 | 0 | 0 | 0 | 0 | 0 | 0 | 0 | 0 | 0 | 0 | 0 | 0 | 0 | 0 | 0 | 0 | 0 | 0 | 0 | 0 | 55 | 0 | 0 | 0 | 0 |
|                                                                                                                                                                                                                               | 0 | 0 | 0 | 0 | 0 | 0 | 0 | 0 | 0 | 0 | 0 | 0 | 0 | 0 | 0 | 0 | 0 | 0 | 0 | 0 | 0 | 0 | 0  | 0 | 0 | 0 | 0 |
|                                                                                                                                                                                                                               | 0 | 0 | 0 | 0 | 0 | 0 | 0 | 0 | 0 | 0 | 0 | 0 | 0 | 0 | 0 | 0 | 0 | 0 | 0 | 0 | 0 | 0 | 0  | 0 | 0 |   |   |
| M02255_77_000000000-ADUT3_1_1112_5986_16812 T---AC---GA-AG-GGA-----GCT-A-G-----C--G--T---T--GT-T-CGG-AA-----TA-A--C-T--GG-GC-----GT--A----AA-GG-GT-GC-----G-TA-G-G-T-G-----G--G-TG-T-G-T-----                                 |   |   |   |   |   |   |   |   |   |   |   |   |   |   |   |   |   |   |   |   |   |   |    |   |   |   |   |
| GC---G-T-T-A-----G-A-T--G--TG--A-AA-TC--C-C-CG-G-G-----CT-T-AA-----C-C-T-G-G-G-A--A-C---T-G--C-A---T--T-----T--AA-T-A---C-----G--G-C--AC--G-T-C---T-A-G-A-G-T--G---C-GA----GA-G-G-----G-G-A-A--AG-C-----GG--A--ATG---G-C-     |   |   |   |   |   |   |   |   |   |   |   |   |   |   |   |   |   |   |   |   |   |   |    |   |   |   |   |
| G-A-GT--GG-A-G-CA-GT--G---A--A-A---TG-C-AT-TG--AG-A-TT--C-G--C-T-A-G-A-AC-A-CC---AG--A--G--GC-GAA-G--G-C-G-----G--C-T-T-T---CTG--G--CT-C-G-----C-T---A-C-T--GA--CA-C-T-A--A-GG--C-A-CG-A--AA-G-C---G-TG--GG-G--               |   |   |   |   |   |   |   |   |   |   |   |   |   |   |   |   |   |   |   |   |   |   |    |   |   |   |   |
| AG-C-A-AA-----CA--GG Bacteria(100);unclassified(100);unclassified(100);unclassified(100);unclassified(100);unclassified(100);unclassified(100);unclassified(100);unclassified(100);                                           |   |   |   |   |   |   |   |   |   |   |   |   |   |   |   |   |   |   |   |   |   |   |    |   |   |   |   |
| Otu1466                                                                                                                                                                                                                       | 0 | 0 | 0 | 0 | 0 | 0 | 0 | 0 | 0 | 0 | 0 | 0 | 0 | 0 | 0 | 0 | 0 | 0 | 0 | 0 | 0 | 0 | 0  | 0 | 0 | 0 | 0 |
|                                                                                                                                                                                                                               | 0 | 0 | 0 | 0 | 0 | 0 | 0 | 0 | 0 | 0 | 0 | 0 | 0 | 0 | 0 | 0 | 0 | 0 | 0 | 0 | 0 | 0 | 25 | 0 | 0 | 0 | 0 |
|                                                                                                                                                                                                                               | 0 | 0 | 0 | 0 | 0 | 0 | 0 | 0 | 0 | 0 | 0 | 0 | 0 | 0 | 0 | 0 | 0 | 0 | 0 | 0 | 0 | 0 | 0  | 0 | 0 | 0 | 0 |
|                                                                                                                                                                                                                               | 0 | 0 | 0 | 0 | 0 | 0 | 0 | 0 | 0 | 0 | 0 | 0 | 0 | 0 | 0 | 0 | 0 | 0 | 0 | 0 | 0 | 0 | 0  | 0 | 0 |   |   |
| M02255_77_000000000-ADUT3_1_1113_18211_15294 T---AC---GT-AG-GTG-----GCA-A-G-----C--G--T---T--AT-C-CGG-AT-----TT-A--C-T--GG-GT-----GT--A----AA-GG-GC-GT-----G-TA-G-G-C-G-----G--G-TC-T-G-C-----                                |   |   |   |   |   |   |   |   |   |   |   |   |   |   |   |   |   |   |   |   |   |   |    |   |   |   |   |
| -----AA---G-T-C-G-----G-A-T--G--TG--A-AA-TT--C-C-CG-G-G-----CT-T-AA-----C-T-C-G-G-G-C-G-G---G-T--C-A---T--C-----C--GA-A-A---C-----T--G-C--GG--A-T-C---T-T-G-A-G-T-A---C-TG----GA-G-A-----G-G-A-T--AG-T-----GG--A--ATT---C-    |   |   |   |   |   |   |   |   |   |   |   |   |   |   |   |   |   |   |   |   |   |   |    |   |   |   |   |
| C-T-A-GT--GT-A-G-CG-GT--A---A--A-A---TG-C-GT-AG--AT-A-TT--A-G--G-A-G-G-A-AC-A-CC---AG--T--G--GC-GAA-G--G-C-G-----G--C-T-A-T---CTG--G--AC-A-G-----T-A---A-C-T--GA--CG-C-T-G--A-GG--C-G-CG-A--AA-G-C---G-TG--GG-                |   |   |   |   |   |   |   |   |   |   |   |   |   |   |   |   |   |   |   |   |   |   |    |   |   |   |   |
| G--AG-C-A-AA-----CA--GG Bacteria(100);Firmicutes(100);Clostridia(100);Clostridiales(100);Ruminococcaceae(100);Fastidiosipila(100);unclassified(100);unclassified(100);unclassified(100);                                      |   |   |   |   |   |   |   |   |   |   |   |   |   |   |   |   |   |   |   |   |   |   |    |   |   |   |   |
| Otu1467                                                                                                                                                                                                                       | 0 | 0 | 0 | 0 | 0 | 0 | 0 | 0 | 0 | 0 | 0 | 0 | 0 | 0 | 0 | 0 | 0 | 0 | 0 | 0 | 0 | 0 | 0  | 0 | 0 | 0 | 0 |
|                                                                                                                                                                                                                               | 0 | 0 | 0 | 0 | 0 | 0 | 0 | 0 | 0 | 0 | 0 | 0 | 0 | 0 | 0 | 0 | 0 | 0 | 0 | 0 | 0 | 0 | 16 | 0 | 0 | 0 | 0 |
|                                                                                                                                                                                                                               | 0 | 0 | 0 | 0 | 0 | 0 | 0 | 0 | 0 | 0 | 0 | 0 | 0 | 0 | 0 | 0 | 0 | 0 | 0 | 0 | 0 | 0 | 0  | 0 | 0 | 0 | 0 |
|                                                                                                                                                                                                                               | 0 | 0 | 0 | 0 | 0 | 0 | 0 | 0 | 0 | 0 | 0 | 0 | 0 | 0 | 0 | 0 | 0 | 0 | 0 | 0 | 0 | 0 | 0  | 0 | 0 |   |   |
| M02255_77_000000000-ADUT3_1_1115_18850_12125 T---AC---GT-AG-GGG-----GCG-A-G-----C--G--T---T--GT-C-CGG-AT-----TT-A--T-T--GG-GC-----GT--A----AA-GA-GC-TC-----G-TA-G-G-C-G-----G--C-TG-G-G-C-----                                |   |   |   |   |   |   |   |   |   |   |   |   |   |   |   |   |   |   |   |   |   |   |    |   |   |   |   |
| -----AA---G-T-C-G-----G-G-T--G--TG--A-AA-AC--T-C-CA-G-G-----CT-C-AA-----C-T-T-G-G-A-G--A-----C-G-CC-A--C--T-----T--GA-T-A---C-----T--G-C--CC-TG-G-C---T-T-G-A-G-T--C---C-GG----TA-G-G-----G-G-A-G---CG-C-----GG--A--ATT---    |   |   |   |   |   |   |   |   |   |   |   |   |   |   |   |   |   |   |   |   |   |   |    |   |   |   |   |
| C-C-T-G-GT--GT-A-G-CG-GT--G---A--A-A---TG-C-GC-AG--AG-A-TC--A-G--G-A-G-G-A-AC-A-CC---GG--T--G--GC-GAA-G--G-C-G-----G--C-G-C-T---CTG--G--GC-C-G-----G-T---A-C-T--GA--CG-C-T-G--A-GG--A-G-CG-A--AA-G-C---G-TG--                 |   |   |   |   |   |   |   |   |   |   |   |   |   |   |   |   |   |   |   |   |   |   |    |   |   |   |   |
| GG-G--AG-C-G-AA-----CA--GG Bacteria(100);Actinobacteria(100);Actinobacteria(100);unclassified(100);unclassified(100);unclassified(100);unclassified(100);unclassified(100);unclassified(100);                                 |   |   |   |   |   |   |   |   |   |   |   |   |   |   |   |   |   |   |   |   |   |   |    |   |   |   |   |
| Otu1468                                                                                                                                                                                                                       | 0 | 0 | 0 | 0 | 0 | 0 | 0 | 0 | 0 | 0 | 0 | 0 | 0 | 0 | 0 | 0 | 0 | 0 | 0 | 0 | 0 | 0 | 0  | 0 | 0 | 0 | 0 |
|                                                                                                                                                                                                                               | 0 | 0 | 0 | 0 | 0 | 0 | 0 | 0 | 0 | 0 | 0 | 0 | 0 | 0 | 0 | 0 | 0 | 0 | 0 | 0 | 0 | 0 | 24 | 0 | 0 | 0 | 0 |
|                                                                                                                                                                                                                               | 0 | 0 | 0 | 0 | 0 | 0 | 0 | 0 | 0 | 0 | 0 | 0 | 0 | 0 | 0 | 0 | 0 | 0 | 0 | 0 | 0 | 0 | 0  | 0 | 0 | 0 | 0 |
|                                                                                                                                                                                                                               | 0 | 0 | 0 | 0 | 0 | 0 | 0 | 0 | 0 | 0 | 0 | 0 | 0 | 0 | 0 | 0 | 0 | 0 | 0 | 0 | 0 | 0 | 0  | 0 | 0 |   |   |
| M02255_77_000000000-ADUT3_1_1116_22331_15015 T---AC---GT-AG-GGT-----GCG-A-G-----C--G--T---T--GT-C-CGG-AA-----TT-A--C-T--GG-GC-----GT--A----AA-GA-GC-TT-----G-TA-G-G-C-G-----G--T-CT-G-T-C-----                                |   |   |   |   |   |   |   |   |   |   |   |   |   |   |   |   |   |   |   |   |   |   |    |   |   |   |   |
| -----GC---G-T-C-T-----T-C-T--G--TG--A-AA-AC--T-T-GG-G-G-----CT-C-AA-----C-C-T-T-A-A-G--C-T---T-G--C-A---G--G-----G--GA-T-A---C-----G--G-G--CA--G-A-C---T-A-G-A-G-T-A---C-TT-----CA-G-G-----G-G-A-G---AC-T-----GG--A--ATT---C- |   |   |   |   |   |   |   |   |   |   |   |   |   |   |   |   |   |   |   |   |   |   |    |   |   |   |   |
| C-T-G-GT--GT-A-G-CG-GT--G---A--A-A---TG-C-GC-AG--AT-A-TC--A-G--G-A-G-G-A-AC-A-CC---GG--T--G--GC-GAA-G--G-C-G-----G--G-T-C-T---CTG--G--GA-A-G-----T-A---A-C-T--GA--CG-C-T-G--A-GA--A-G-CG-A--AA-G-C---G-TG--GG-                |   |   |   |   |   |   |   |   |   |   |   |   |   |   |   |   |   |   |   |   |   |   |    |   |   |   |   |
| T--AG-C-G-AA-----CA--GG Bacteria(100);Actinobacteria(100);Actinobacteria(100);Actinobacteridae(100);Actinomycetales(100);Corynebacterineae(100);Nocardiaceae(100);Nocardia(100);unclassified(100);                            |   |   |   |   |   |   |   |   |   |   |   |   |   |   |   |   |   |   |   |   |   |   |    |   |   |   |   |
| Otu1469                                                                                                                                                                                                                       | 0 | 0 | 0 | 0 | 0 | 0 | 0 | 0 | 0 | 0 | 0 | 0 | 0 | 0 | 0 | 0 | 0 | 0 | 0 | 0 | 0 | 0 | 0  | 0 | 0 | 0 | 0 |
|                                                                                                                                                                                                                               | 0 | 0 | 0 | 0 | 0 | 0 | 0 | 0 | 0 | 0 | 0 | 0 | 0 | 0 | 0 | 0 | 0 | 0 | 0 | 0 | 0 | 0 | 27 | 0 | 0 | 0 | 0 |
|                                                                                                                                                                                                                               | 0 | 0 | 0 | 0 | 0 | 0 | 0 | 0 | 0 | 0 | 0 | 0 | 0 | 0 | 0 | 0 | 0 | 0 | 0 | 0 | 0 | 0 | 0  | 0 | 0 | 0 | 0 |
|                                                                                                                                                                                                                               | 0 | 0 | 0 | 0 | 0 | 0 | 0 | 0 | 0 | 0 | 0 | 0 | 0 | 0 | 0 | 0 | 0 | 0 | 0 | 0 | 0 | 0 | 0  | 0 | 0 |   |   |
| M02255_77_000000000-ADUT3_1_1118_26201_13474 T---AC---GA-AG-GGG-----GCT-A-G-----C--G--T---T--GT-T-CGG-AA-----TT-A--C-T--GG-GC-----GT--A----AA-GC-GC-GC-----G-TA-G-G-C-G-----G--A-TA-T-T-T-----                                |   |   |   |   |   |   |   |   |   |   |   |   |   |   |   |   |   |   |   |   |   |   |    |   |   |   |   |
| -----AA---G-T-C-A-----G-G-G--G--TG--A-AA-TG--C-C-AG-G-G-----CT-C-AA-----C-C-T-T-G-G-A--A-C---T-G--C-C---T--T-----T--GA-T-A---C-----T--G-G--GT--A-T-C---T-G-G-A-G-T--T---T-GG----GA-G-A-----G-G-T-G---AG-T-----GG--A--ATT---C- |   |   |   |   |   |   |   |   |   |   |   |   |   |   |   |   |   |   |   |   |   |   |    |   |   |   |   |
| C-G-A-GT--GT-A-G-AG-GT--G---A--A-A---TT-C-GT-AG--AT-A-TT--C-G--G-A-G-G-A-AC-A-CC---AG--A--A--GC-GAA-G--G-C-G-----G--C-T-C-A---CTG--G--CC-C-A-----A-T---A-C-T--GA--CG-C-T-G--A-GG--C-G-CG-A--AA-G-C---G-TG--GG-                |   |   |   |   |   |   |   |   |   |   |   |   |   |   |   |   |   |   |   |   |   |   |    |   |   |   |   |
| G--AG-C-A-AA-----CA--GG Bacteria(100);Proteobacteria(100);Alphaproteobacteria(100);unclassified(100);unclassified(100);unclassified(100);unclassified(100);unclassified(100);unclassified(100);                               |   |   |   |   |   |   |   |   |   |   |   |   |   |   |   |   |   |   |   |   |   |   |    |   |   |   |   |



|                                                                                                                                                                                                                              |   |   |   |   |   |   |   |   |   |   |   |   |   |   |   |   |   |   |   |   |   |   |    |   |   |   |   |
|------------------------------------------------------------------------------------------------------------------------------------------------------------------------------------------------------------------------------|---|---|---|---|---|---|---|---|---|---|---|---|---|---|---|---|---|---|---|---|---|---|----|---|---|---|---|
| Otu1470                                                                                                                                                                                                                      | 0 | 0 | 0 | 0 | 0 | 0 | 0 | 0 | 0 | 0 | 0 | 0 | 0 | 0 | 0 | 0 | 0 | 0 | 0 | 0 | 0 | 0 | 0  | 0 | 0 | 0 | 0 |
|                                                                                                                                                                                                                              | 0 | 0 | 0 | 0 | 0 | 0 | 0 | 0 | 0 | 0 | 0 | 0 | 0 | 0 | 0 | 0 | 0 | 0 | 0 | 0 | 0 | 0 | 18 | 0 | 0 | 0 | 0 |
|                                                                                                                                                                                                                              | 0 | 0 | 0 | 0 | 0 | 0 | 0 | 0 | 0 | 0 | 0 | 0 | 0 | 0 | 0 | 0 | 0 | 0 | 0 | 0 | 0 | 0 | 0  | 0 | 0 | 0 | 0 |
|                                                                                                                                                                                                                              | 0 | 0 | 0 | 0 | 0 | 0 | 0 | 0 | 0 | 0 | 0 | 0 | 0 | 0 | 0 | 0 | 0 | 0 | 0 | 0 | 0 | 0 | 0  | 0 | 0 |   |   |
| M02255_77_000000000-ADUT3_1_2115_16602_13316 C---AC---GT-AG-GGG-----GCA-A-G-----C-G--T---T--AC-C-CGG-AT-----TT-A--C-T--GG-GC-----GT--A-----CA-GC-GC-GC-----G-TA-G-G-C-G-----G--C-TG-G-C-C-----                               |   |   |   |   |   |   |   |   |   |   |   |   |   |   |   |   |   |   |   |   |   |   |    |   |   |   |   |
| -----AA---G-C-G-T-----G-G-T--G--TG--A-AA-TC--T-C-CG-G-G-----CT-C-AA-----C-C-C-G-G-A-A--A-C---T-G--C-A--C-C-----G--CG-A-A--C-----TG-G-T--CT--G-G-C---T-A-G-A-G-T--G---C-AG-----GA-G-G-----G-G-G-T---GG-T-----GG--A--ATT-----  |   |   |   |   |   |   |   |   |   |   |   |   |   |   |   |   |   |   |   |   |   |   |    |   |   |   |   |
| C-C-C-G-GT--GT-A-G-CG-GT--G---A--A---TG-C-GT-AG--AT-A-TC--G-G--G-A-G-G-A-AC-A-CC---AG--T--G--GC-GAA-G--G-C-G-----A--C-C-A-C---CTG--G--CC-T-G-----T-A---A-C-T--GA--CG-C-T-G--A-TG--C-G-CG-A--AA-G-C---G-TG--                  |   |   |   |   |   |   |   |   |   |   |   |   |   |   |   |   |   |   |   |   |   |   |    |   |   |   |   |
| GG-G--AG-C-G-AA-----CC--GG Bacteria(100);unclassified(100);unclassified(100);unclassified(100);unclassified(100);unclassified(100);unclassified(100);unclassified(100);unclassified(100);                                    |   |   |   |   |   |   |   |   |   |   |   |   |   |   |   |   |   |   |   |   |   |   |    |   |   |   |   |
| Otu1471                                                                                                                                                                                                                      | 0 | 0 | 0 | 0 | 0 | 0 | 0 | 0 | 0 | 0 | 0 | 0 | 0 | 0 | 0 | 0 | 0 | 0 | 0 | 0 | 0 | 0 | 0  | 0 | 0 | 0 | 0 |
|                                                                                                                                                                                                                              | 0 | 0 | 0 | 0 | 0 | 0 | 0 | 0 | 0 | 0 | 0 | 0 | 0 | 0 | 0 | 0 | 0 | 0 | 0 | 0 | 0 | 0 | 14 | 0 | 0 | 0 | 0 |
|                                                                                                                                                                                                                              | 0 | 0 | 0 | 0 | 0 | 0 | 0 | 0 | 0 | 0 | 0 | 0 | 0 | 0 | 0 | 0 | 0 | 0 | 0 | 0 | 0 | 0 | 0  | 0 | 0 | 0 | 0 |
|                                                                                                                                                                                                                              | 0 | 0 | 0 | 0 | 0 | 0 | 0 | 0 | 0 | 0 | 0 | 0 | 0 | 0 | 0 | 0 | 0 | 0 | 0 | 0 | 0 | 0 | 0  | 0 | 0 |   |   |
| M02255_77_000000000-ADUT3_1_1109_8539_17151 G---AC---GT-AG-GGC-----GCA-A-G-----C--G--T---T--GT-C-CGG-AT-----TT-A--T-T--GG-GC-----GT--A-----AA-GA-GC-TC-----G-TA-G-G-C-G-----G--C-TT-G-T-C-----AC--                           |   |   |   |   |   |   |   |   |   |   |   |   |   |   |   |   |   |   |   |   |   |   |    |   |   |   |   |
| ---G-T-C-G-----T-C-C-G--TG--A-AA-AC--T-T-CA-G-G-----CT-T-AA-----C-C-T-G-G-A-G--C-G---T-G--C-G---G--T-----C--GA-T-A--C-----G--G-G--CT--G-G-C---T-A-G-A-G-G--C---A-GG-----TA-G-G-----G-G-A-G---AT-C-----GG--A--ATT---C-C-T-G-  |   |   |   |   |   |   |   |   |   |   |   |   |   |   |   |   |   |   |   |   |   |   |    |   |   |   |   |
| GT--GT-A-G-CG-GT--G---A--A---TG-C-GC-AG--AT-A-TC--A-G--G-A-G-G-A-AC-A-CC--GG--T--G--GC-GAA-G--G-C-G-----G--A-T-C-T---CTG--G--GC-C-T-----G-T---A-C-T--GA--CG-C-T-G--A-GG--A-G-CG-A--AA-G-C---G-TG--GG-G--AG-                  |   |   |   |   |   |   |   |   |   |   |   |   |   |   |   |   |   |   |   |   |   |   |    |   |   |   |   |
| C-G-AA-----CA--GG Bacteria(100);Actinobacteria(100);Actinobacteria(100);Actinobacteridae(100);Actinomycetales(100);unclassified(100);unclassified(100);unclassified(100);unclassified(100);                                  |   |   |   |   |   |   |   |   |   |   |   |   |   |   |   |   |   |   |   |   |   |   |    |   |   |   |   |
| Otu1472                                                                                                                                                                                                                      | 0 | 0 | 0 | 0 | 0 | 0 | 0 | 0 | 0 | 0 | 0 | 0 | 0 | 0 | 0 | 0 | 0 | 0 | 0 | 0 | 0 | 0 | 0  | 0 | 0 | 0 | 0 |
|                                                                                                                                                                                                                              | 0 | 0 | 0 | 0 | 0 | 0 | 0 | 0 | 0 | 0 | 0 | 0 | 0 | 0 | 0 | 0 | 0 | 0 | 0 | 0 | 0 | 0 | 12 | 0 | 0 | 0 | 0 |
|                                                                                                                                                                                                                              | 0 | 0 | 0 | 0 | 0 | 0 | 0 | 0 | 0 | 0 | 0 | 0 | 0 | 0 | 0 | 0 | 0 | 0 | 0 | 0 | 0 | 0 | 0  | 0 | 0 | 0 | 0 |
|                                                                                                                                                                                                                              | 0 | 0 | 0 | 0 | 0 | 0 | 0 | 0 | 0 | 0 | 0 | 0 | 0 | 0 | 0 | 0 | 0 | 0 | 0 | 0 | 0 | 0 | 0  | 0 | 0 |   |   |
| M02255_76_000000000-ADUNE_1_1117_12473_9704 C---TA--AC-TC-CGT-----GCC-A-G-----C----A--G--CC-G-CGG-TA-----AT-A--C-G--GA-GG-----GT--G-----CA--A-GC-G-----T-TA-A-T-C-G-----G--A-TT-G-C-T-----CA----                             |   |   |   |   |   |   |   |   |   |   |   |   |   |   |   |   |   |   |   |   |   |   |    |   |   |   |   |
| G-T-C-G-----G-A-T--G--TG--A-AA-GC--C-C-CG-G-G-----CT-T-AA-----C-C-T-G-G-G-A--A-T---T-G--C-A--T--T-----C--GA-T-A--C-----T-G-G--CA--G-A-C---T-A-G-A-G-T--G---T-GG-----AA-G-A-----G-G-A-A---GG-T-----GG--A--ATT---C-C-A-G-      |   |   |   |   |   |   |   |   |   |   |   |   |   |   |   |   |   |   |   |   |   |   |    |   |   |   |   |
| GT--GT-A-G-CG-GT--G---A--A---TG-C-GT-AG--AT-A-TC--T-G--G-A-G-G-A-AC-A-TC---AG--T--G--GC-GAA-G--G-C-G-----G--C-C-T-T---CTG--G--TC-C-A-----A-C---A-C-T--GA--CG-C-T-G--A-GG--T-G-CG-A--AA-G-C---G-TG--GG-G--AG-C-               |   |   |   |   |   |   |   |   |   |   |   |   |   |   |   |   |   |   |   |   |   |   |    |   |   |   |   |
| A-AA-----CA--GG Bacteria(100);Proteobacteria(100);Gammaproteobacteria(100);unclassified(100);unclassified(100);unclassified(100);unclassified(100);unclassified(100);unclassified(100);                                      |   |   |   |   |   |   |   |   |   |   |   |   |   |   |   |   |   |   |   |   |   |   |    |   |   |   |   |
| Otu1473                                                                                                                                                                                                                      | 0 | 0 | 0 | 0 | 0 | 0 | 0 | 0 | 0 | 0 | 0 | 0 | 0 | 0 | 0 | 0 | 0 | 0 | 0 | 0 | 0 | 0 | 0  | 0 | 0 | 0 | 0 |
|                                                                                                                                                                                                                              | 0 | 0 | 0 | 0 | 0 | 0 | 0 | 0 | 0 | 0 | 0 | 0 | 0 | 0 | 0 | 0 | 0 | 0 | 0 | 0 | 0 | 0 | 14 | 0 | 0 | 0 | 0 |
|                                                                                                                                                                                                                              | 0 | 0 | 0 | 0 | 0 | 0 | 0 | 0 | 0 | 0 | 0 | 0 | 0 | 0 | 0 | 0 | 0 | 0 | 0 | 0 | 0 | 0 | 0  | 0 | 0 | 0 | 0 |
|                                                                                                                                                                                                                              | 0 | 0 | 0 | 0 | 0 | 0 | 0 | 0 | 0 | 0 | 0 | 0 | 0 | 0 | 0 | 0 | 0 | 0 | 0 | 0 | 0 | 0 | 0  | 0 | 0 |   |   |
| M02255_77_000000000-ADUT3_1_1108_19885_20520 T---AC---GG-AG-GGG-----GCA-A-G-----C--G--T---T--GT-T-CGG-AA-----TT-A--C-T--GG-GC-----GT--A-----AA-GG-GC-GC-----G-TA-G-G-C-G-----G--T-CT-G-T-C-----                              |   |   |   |   |   |   |   |   |   |   |   |   |   |   |   |   |   |   |   |   |   |   |    |   |   |   |   |
| -----GC---G-T-C-A-----G-G-T--G--TG--A-AA-GC--C-C-CG-G-G-----CT-C-AA-----C-C-T-G-G-G-A--G-G---T-G--C-A--C--T-----T--GA-T-A--C-----G--G-G--CG--G-G-C---T-G-G-A-G-T--C---C-GA-----GA-G-A-----G-G-T-G---AG-T-----GG--A--ATT---   |   |   |   |   |   |   |   |   |   |   |   |   |   |   |   |   |   |   |   |   |   |   |    |   |   |   |   |
| -C-C-C-A-GT--GT-A-G-AG-GT--G---A--A---TT-C-GT-AG--AT-A-TT--G-G--G-A-G-A-AC-A-CC---AG--T--G--GC-GAA-G--G-C-G-----G--C-T-C-A---CTG--G--CT-C-G-----G-A---A-C-T--GA--CG-C-T-G--A-GG--C-G-CG-A--AA-G-C---G-TG--                   |   |   |   |   |   |   |   |   |   |   |   |   |   |   |   |   |   |   |   |   |   |   |    |   |   |   |   |
| GG-G--AG-C-A-AA-----CA--GG Bacteria(100);Proteobacteria(100);Alphaproteobacteria(100);unclassified(100);unclassified(100);unclassified(100);unclassified(100);unclassified(100);unclassified(100);                           |   |   |   |   |   |   |   |   |   |   |   |   |   |   |   |   |   |   |   |   |   |   |    |   |   |   |   |
| Otu1474                                                                                                                                                                                                                      | 0 | 0 | 0 | 0 | 0 | 0 | 0 | 0 | 0 | 0 | 0 | 0 | 0 | 0 | 0 | 0 | 0 | 0 | 0 | 0 | 0 | 0 | 0  | 0 | 0 | 0 | 0 |
|                                                                                                                                                                                                                              | 0 | 0 | 0 | 0 | 0 | 0 | 0 | 0 | 0 | 0 | 0 | 0 | 0 | 0 | 0 | 0 | 0 | 0 | 0 | 0 | 0 | 0 | 12 | 0 | 0 | 0 | 0 |
|                                                                                                                                                                                                                              | 0 | 0 | 0 | 0 | 0 | 0 | 0 | 0 | 0 | 0 | 0 | 0 | 0 | 0 | 0 | 0 | 0 | 0 | 0 | 0 | 0 | 0 | 0  | 0 | 0 | 0 | 0 |
|                                                                                                                                                                                                                              | 0 | 0 | 0 | 0 | 0 | 0 | 0 | 0 | 0 | 0 | 0 | 0 | 0 | 0 | 0 | 0 | 0 | 0 | 0 | 0 | 0 | 0 | 0  | 0 | 0 |   |   |
| M02255_77_000000000-ADUT3_1_2108_9597_9522 T---AC---GT-AG-GGC-----GCA-A-G-----C--G--T---T--GT-C-CGG-AA-----TT-A--T-T--GG-GC-----GT--A-----AA-GA-GC-TC-----G-TA-G-G-C-G-----G--T-TT-G-T-C-----GC--                            |   |   |   |   |   |   |   |   |   |   |   |   |   |   |   |   |   |   |   |   |   |   |    |   |   |   |   |
| ---G-T-C-T-----G-T-C--G--TG--A-AA-GC--C-C-AC-G-G-----CT-T-AA-----C-C-G-T-G-G-G--T-C---T-G--C-G---G--T-----G--GA-T-A--C-----G--G-G--CA--G-A-C---T-A-G-A-G-G--C---A-GG-----TA-G-G-----G-G-A-G---AA-T-----GG--A--ATT---C-C-C-G- |   |   |   |   |   |   |   |   |   |   |   |   |   |   |   |   |   |   |   |   |   |   |    |   |   |   |   |
| GT--GT-A-G-CG-GT--G---A--A---TG-C-GC-AG--AT-A-TC--G-G--G-A-G-G-A-AC-A-CC--GG--T--G--GC-GAA-G--G-C-G-----G--T-T-C-T---CTG--G--GC-C-T-----G-T---A-C-T--GA--CG-C-T-G--A-GG--A-G-CG-A--AA-G-C---G-TG--GG-G--AG-                  |   |   |   |   |   |   |   |   |   |   |   |   |   |   |   |   |   |   |   |   |   |   |    |   |   |   |   |
| C-G-AA-----CA--GG Bacteria(100);Actinobacteria(100);Actinobacteria(100);Actinobacteridae(100);Actinomycetales(100);Streptosporangineae(100);Thermomonosporaceae(100);Actinomadura(100);unclassified(100);                    |   |   |   |   |   |   |   |   |   |   |   |   |   |   |   |   |   |   |   |   |   |   |    |   |   |   |   |



|                                                                                                                                                                                                                                                                                                                                                                                                                                                                                                                                                                                                                                                                                                                                                                                                                                                             |   |   |   |    |   |   |   |   |   |   |   |   |   |   |   |   |   |   |   |   |   |   |    |   |   |   |   |
|-------------------------------------------------------------------------------------------------------------------------------------------------------------------------------------------------------------------------------------------------------------------------------------------------------------------------------------------------------------------------------------------------------------------------------------------------------------------------------------------------------------------------------------------------------------------------------------------------------------------------------------------------------------------------------------------------------------------------------------------------------------------------------------------------------------------------------------------------------------|---|---|---|----|---|---|---|---|---|---|---|---|---|---|---|---|---|---|---|---|---|---|----|---|---|---|---|
| Otu1475                                                                                                                                                                                                                                                                                                                                                                                                                                                                                                                                                                                                                                                                                                                                                                                                                                                     | 0 | 0 | 0 | 0  | 0 | 0 | 0 | 0 | 0 | 0 | 0 | 0 | 0 | 0 | 0 | 0 | 0 | 0 | 0 | 0 | 0 | 0 | 0  | 0 | 0 | 0 | 0 |
|                                                                                                                                                                                                                                                                                                                                                                                                                                                                                                                                                                                                                                                                                                                                                                                                                                                             | 0 | 0 | 0 | 0  | 0 | 0 | 0 | 0 | 0 | 0 | 0 | 0 | 0 | 0 | 0 | 0 | 0 | 0 | 0 | 0 | 0 | 0 | 18 | 0 | 0 | 0 | 0 |
|                                                                                                                                                                                                                                                                                                                                                                                                                                                                                                                                                                                                                                                                                                                                                                                                                                                             | 0 | 0 | 0 | 0  | 0 | 0 | 0 | 0 | 0 | 0 | 0 | 0 | 0 | 0 | 0 | 0 | 0 | 0 | 0 | 0 | 0 | 0 | 0  | 0 | 0 | 0 | 0 |
|                                                                                                                                                                                                                                                                                                                                                                                                                                                                                                                                                                                                                                                                                                                                                                                                                                                             | 0 | 0 | 0 | 0  | 0 | 0 | 0 | 0 | 0 | 0 | 0 | 0 | 0 | 0 | 0 | 0 | 0 | 0 | 0 | 0 | 0 | 0 | 0  | 0 | 0 |   |   |
| M02255_77_000000000-ADUT3_1_2117_5422_11496 T---AC---GT-AG-GGT-----GCG-A-G-----C-G--T---T--GT-C-CGG-AA-----TT-A--T-T--GG-GC-----GT--A-----AA-GA-GC-TC-----G-TA-G-G-C-G-----G--T-TT-G-T-C-----GC-<br>---G-T-C-G-----T-T-C--G--TG--A-AA-AC--T-C-CA-C-G-----CT-T-AA-----C-G-T-G-G-A-G--C-G---T-G--C-G--G--G-----C-GA-T-A--C-----G--G-G--CA--G-A-C---T-T-G-A-G-T--T---C-GG-----TA-G-G-----G-G-A-G---AC-T-----GG--A--ATT---C-C-T-G-<br>GT--GT-A-G-CG-GT--G---A--A-A---TG-C-GC-AG--AT-A-TC--A-G--G-A-G-G-A-AC-A-CC---GG--T--G--GC-GAA-G--G-C-G-----G--G-T-C-T---CTG--G--GC-C-G-----A-T---A-C-T--GA--CG-C-T-G--A-GG--A-G-CG-A--AA-G-C---G-TG--GG-G--AG-<br>C-G-AA-----CA--GG Bacteria(100);Actinobacteria(100);Actinobacteria(100);Actinobacteridae(100);Actinomycetales(100);Pseudonocardineae(100);Pseudonocardiaceae(100);Amycolatopsis(100);unclassified(100); |   |   |   |    |   |   |   |   |   |   |   |   |   |   |   |   |   |   |   |   |   |   |    |   |   |   |   |
| Otu1476                                                                                                                                                                                                                                                                                                                                                                                                                                                                                                                                                                                                                                                                                                                                                                                                                                                     | 0 | 0 | 0 | 0  | 0 | 0 | 0 | 0 | 0 | 0 | 0 | 0 | 0 | 0 | 0 | 0 | 0 | 0 | 0 | 0 | 0 | 0 | 0  | 0 | 0 | 0 | 0 |
|                                                                                                                                                                                                                                                                                                                                                                                                                                                                                                                                                                                                                                                                                                                                                                                                                                                             | 0 | 0 | 0 | 0  | 0 | 0 | 0 | 0 | 0 | 0 | 0 | 0 | 0 | 0 | 0 | 0 | 0 | 0 | 0 | 0 | 0 | 0 | 24 | 0 | 0 | 0 | 0 |
|                                                                                                                                                                                                                                                                                                                                                                                                                                                                                                                                                                                                                                                                                                                                                                                                                                                             | 0 | 0 | 0 | 0  | 0 | 0 | 0 | 0 | 0 | 0 | 0 | 0 | 0 | 0 | 0 | 0 | 0 | 0 | 0 | 0 | 0 | 0 | 0  | 0 | 0 | 0 | 0 |
|                                                                                                                                                                                                                                                                                                                                                                                                                                                                                                                                                                                                                                                                                                                                                                                                                                                             | 0 | 0 | 0 | 0  | 0 | 0 | 0 | 0 | 0 | 0 | 0 | 0 | 0 | 0 | 0 | 0 | 0 | 0 | 0 | 0 | 0 | 0 | 0  | 0 | 0 |   |   |
| M02255_77_000000000-ADUT3_1_2118_6911_11562 T---AC---GT-AG-GAC-----CCA-A-G-----C-G--T---T--AT-C-CGG-AA-----TT-A--C-T--GG-GC-----GT--A-----AA-GA-GT-TT-----G-TA-G-G-C-G-----G--T-TT-T-T-C-----AA---<br>-G-T-C-A-----G-T-T--G--CG--A-AA-TC--C-T-TC-C-G-----CT-C-AA-----C-G-G-AAT-G-G--A-C---T-G--T-G--A--T-----T--GA-A-A--C-----T--G-A--AT--T-A-C---T-A-G-A-G-G--T--T-GG-----TA-G-A-----G-G-T-G---CG-T-----GG--A--ATT---T-C-T-G-GT-<br>-GT-A-G-GA-GT--G---A--C-A---TC-C-GT-AG--AT-A-TC--A-G--A-A-G-G-A-AC-A-CC---AA--T--G--GC-GAA-G--G-C-A-----G--C-G-C-A---CTG--G--GC-C-A-----T-A---C-C-T--GA--CG-C-T-G--A-GA--A-A-CG-A--AA-G-C---G-TG--GG-G--AG-C-G-<br>AA-----CG--GG Bacteria(100);unclassified(100);unclassified(100);unclassified(100);unclassified(100);unclassified(100);unclassified(100);unclassified(100);unclassified(100);                        |   |   |   |    |   |   |   |   |   |   |   |   |   |   |   |   |   |   |   |   |   |   |    |   |   |   |   |
| Otu1477                                                                                                                                                                                                                                                                                                                                                                                                                                                                                                                                                                                                                                                                                                                                                                                                                                                     | 0 | 0 | 0 | 0  | 0 | 0 | 0 | 0 | 0 | 0 | 0 | 0 | 0 | 0 | 0 | 0 | 0 | 0 | 0 | 0 | 0 | 0 | 0  | 0 | 0 | 0 | 0 |
|                                                                                                                                                                                                                                                                                                                                                                                                                                                                                                                                                                                                                                                                                                                                                                                                                                                             | 0 | 0 | 0 | 0  | 0 | 0 | 0 | 0 | 0 | 0 | 0 | 0 | 0 | 0 | 0 | 0 | 0 | 0 | 0 | 0 | 0 | 0 | 13 | 0 | 0 | 0 | 0 |
|                                                                                                                                                                                                                                                                                                                                                                                                                                                                                                                                                                                                                                                                                                                                                                                                                                                             | 0 | 0 | 0 | 0  | 0 | 0 | 0 | 0 | 0 | 0 | 0 | 0 | 0 | 0 | 0 | 0 | 0 | 0 | 0 | 0 | 0 | 0 | 0  | 0 | 0 | 0 | 0 |
|                                                                                                                                                                                                                                                                                                                                                                                                                                                                                                                                                                                                                                                                                                                                                                                                                                                             | 0 | 0 | 0 | 0  | 0 | 0 | 0 | 0 | 0 | 0 | 0 | 0 | 0 | 0 | 0 | 0 | 0 | 0 | 0 | 0 | 0 | 0 | 0  | 0 | 0 |   |   |
| M02255_77_000000000-ADUT3_1_1105_7984_20512 T---AC---AG-AG-GCC-----CCA-A-G-----C--A--T---T--AT-C-CGG-AT-----TC-A--C-T--GG-GC-----GT--A-----AA-GG-GT-GC-----G-TA-G-G-C-G-----G--T-GT-G-A-T-----TA-<br>---G-T-C-G-----G-G-T--G--TT--A-AA-TC--C-T-GG-G-G-----CT-C-AA-----C-C-T-C-A-G-A--A-T---C-G--C-A--T--T-----C--GA-A-A--C-----G--G-T--CA--T-A-C---T-A-G-A-A-G--A--A-GT-----CA-G-A-----G-G-T-G---AA-C-----AG--A--ACT---C-T-C-G-<br>GT--GT-A-G-GG-GT--G---A--A-A---TC-C-GT-TG--AT-A-TC--G-A--G-G-G-G-A-AT-A-CC---AA--A--T--GC-GAA-G--G-C-A-----G--T-T-C-A---CTG--G--GG-C-T-----T-T---C-T-T--GA--CG-C-T-G--A-GG--C-A-CG-A--AA-G-C---G-TG--GG-T--AG-C-<br>G-AA-----CG--GG Bacteria(100);Candidate_division_OD1(100);unclassified(100);unclassified(100);unclassified(100);unclassified(100);unclassified(100);unclassified(100);unclassified(100);             |   |   |   |    |   |   |   |   |   |   |   |   |   |   |   |   |   |   |   |   |   |   |    |   |   |   |   |
| Otu1478                                                                                                                                                                                                                                                                                                                                                                                                                                                                                                                                                                                                                                                                                                                                                                                                                                                     | 0 | 0 | 0 | 0  | 0 | 0 | 0 | 0 | 0 | 0 | 0 | 0 | 0 | 0 | 0 | 0 | 0 | 0 | 0 | 0 | 0 | 0 | 0  | 0 | 0 | 0 | 0 |
|                                                                                                                                                                                                                                                                                                                                                                                                                                                                                                                                                                                                                                                                                                                                                                                                                                                             | 0 | 0 | 0 | 0  | 0 | 0 | 0 | 0 | 0 | 0 | 0 | 0 | 0 | 0 | 0 | 0 | 0 | 0 | 0 | 0 | 0 | 0 | 13 | 0 | 0 | 0 | 0 |
|                                                                                                                                                                                                                                                                                                                                                                                                                                                                                                                                                                                                                                                                                                                                                                                                                                                             | 0 | 0 | 0 | 0  | 0 | 0 | 0 | 0 | 0 | 0 | 0 | 0 | 0 | 0 | 0 | 0 | 0 | 0 | 0 | 0 | 0 | 0 | 0  | 0 | 0 | 0 | 0 |
|                                                                                                                                                                                                                                                                                                                                                                                                                                                                                                                                                                                                                                                                                                                                                                                                                                                             | 0 | 0 | 0 | 0  | 0 | 0 | 0 | 0 | 0 | 0 | 0 | 0 | 0 | 0 | 0 | 0 | 0 | 0 | 0 | 0 | 0 | 0 | 0  | 0 | 0 |   |   |
| M02255_76_000000000-ADUNE_1_2105_13844_11716 T---AC---GT-AG-GGT-----CCG-A-G-----C-G--T---T--GT-C-CGG-AA-----TT-A--T-T--GG-GC-----GT--A-----AA-----G---G-G-C-----TC-G-T-C-----AC-<br>---G-T-C-G-----G-G-A--G--TG--A-AA-AC--T-C-GG-G-G-----CT-T-AA-----C-C-C-C-G-A-G--C-C---T-G--C-T---T--C-----C--GA-T-A--C-----G--G-G--CA--G-A-C---T-A-G-A-G-G--T---A-GG-----CA-G-G-----G-G-A-G---AG-C-----GG--A--ACT---C-C-T-G-<br>GT--GT-A-G-CG-GT--G---G--A-A---TG-C-GC-AG--AT-A-TC--A-G--G-A-A-G-A-AC-A-CC---GG--T--G--GC-GAA-G--G-C-G-----G--C-T-C-T---CTG--G--GC-C-T-----T-A---C-C-T--GA--CG-C-T-G--A-GG--A-G-CG-A--AA-G-C---G-TG--GG-T--AG-<br>C-G-AA-----CA--GG Bacteria(100);Actinobacteria(100);Actinobacteria(100);Actinobacteridae(100);Actinomycetales(100);Propionibacterineae(100);Nocardiodaceae(100);Kribbella(100);unclassified(100);                     |   |   |   |    |   |   |   |   |   |   |   |   |   |   |   |   |   |   |   |   |   |   |    |   |   |   |   |
| Otu1479                                                                                                                                                                                                                                                                                                                                                                                                                                                                                                                                                                                                                                                                                                                                                                                                                                                     | 0 | 0 | 0 | 0  | 0 | 0 | 0 | 0 | 0 | 0 | 0 | 0 | 0 | 0 | 0 | 0 | 0 | 0 | 0 | 0 | 0 | 0 | 0  | 0 | 0 | 0 | 0 |
|                                                                                                                                                                                                                                                                                                                                                                                                                                                                                                                                                                                                                                                                                                                                                                                                                                                             | 0 | 0 | 0 | 0  | 0 | 0 | 0 | 0 | 0 | 0 | 0 | 0 | 0 | 0 | 0 | 0 | 0 | 0 | 0 | 0 | 0 | 0 | 0  | 0 | 0 | 0 | 0 |
|                                                                                                                                                                                                                                                                                                                                                                                                                                                                                                                                                                                                                                                                                                                                                                                                                                                             | 0 | 0 | 0 | 14 | 0 | 0 | 0 | 0 | 0 | 0 | 0 | 0 | 0 | 0 | 0 | 0 | 0 | 0 | 0 | 0 | 0 | 0 | 0  | 0 | 0 | 0 | 0 |
|                                                                                                                                                                                                                                                                                                                                                                                                                                                                                                                                                                                                                                                                                                                                                                                                                                                             | 0 | 0 | 0 | 0  | 0 | 0 | 0 | 0 | 0 | 0 | 0 | 0 | 0 | 0 | 0 | 0 | 0 | 0 | 0 | 0 | 0 | 0 | 0  | 0 | 0 |   |   |
| M02255_77_000000000-ADUT3_1_1105_12266_7061 T---AC---GA-AG-GGG-----GCT-A-G-----C--G--T---T--GC-T-CGG-AA-----TG-A--C-T--GG-GC-----GT--A-----AA-GG-GC-GC-----G-TA-G-G-C-G-----G--C-GT-G-C-A-----<br>TA---G-T-C-A-----G-A-T--G--TG--A-AA-TT--C-C-TG-G-G-----CT-T-AA-----C-C-T-G-G-G-G--G-C---T-G--C-A--T--T-----T--GA-T-A--C-----G--T-G--TG--T-G-C---T-G-G-A-G-T--G---T-GA---AA-G-A-----G-G-G-T---CG-T-----GG--A--ATT---C-C-C-<br>A-GT--GT-A-G-AG-GT--G---A--A-A---TT-C-GT-AG--AT-A-TT--G-G--G-A-A-G-A-AC-A-CC---GG--T--G--GC-GAA-G--G-C-G-----G--C-G-A-C---CTG--G--TT-C-A-----T-T---A-C-T--GA--CG-C-T-G--A-GG--C-G-CG-A--AA-G-C---G-TG--GG-G--<br>AG-C-A-AA-----CA--GG Bacteria(100);Proteobacteria(100);Alphaproteobacteria(100);Rhodospirillales(100);Acetobacteraceae(100);unclassified(100);unclassified(100);unclassified(100);unclassified(100);        |   |   |   |    |   |   |   |   |   |   |   |   |   |   |   |   |   |   |   |   |   |   |    |   |   |   |   |



|                                                                                                                                                                                                                               |   |   |   |   |   |   |   |   |   |   |   |   |   |   |   |   |   |   |   |   |   |   |    |   |   |   |   |
|-------------------------------------------------------------------------------------------------------------------------------------------------------------------------------------------------------------------------------|---|---|---|---|---|---|---|---|---|---|---|---|---|---|---|---|---|---|---|---|---|---|----|---|---|---|---|
| Otu1480                                                                                                                                                                                                                       | 0 | 0 | 0 | 0 | 0 | 0 | 0 | 0 | 0 | 0 | 0 | 0 | 0 | 0 | 0 | 0 | 0 | 0 | 0 | 0 | 0 | 0 | 0  | 0 | 0 | 0 | 0 |
|                                                                                                                                                                                                                               | 0 | 0 | 0 | 0 | 0 | 0 | 0 | 0 | 0 | 0 | 0 | 0 | 0 | 0 | 0 | 0 | 0 | 0 | 0 | 0 | 0 | 0 | 47 | 0 | 0 | 0 | 0 |
|                                                                                                                                                                                                                               | 0 | 0 | 0 | 0 | 0 | 0 | 0 | 0 | 0 | 0 | 0 | 0 | 0 | 0 | 0 | 0 | 0 | 0 | 0 | 0 | 0 | 0 | 0  | 0 | 0 | 0 | 0 |
|                                                                                                                                                                                                                               | 0 | 0 | 0 | 0 | 0 | 0 | 0 | 0 | 0 | 0 | 0 | 0 | 0 | 0 | 0 | 0 | 0 | 0 | 0 | 0 | 0 | 0 | 0  | 0 | 0 |   |   |
| M02255_77_000000000-ADUT3_1_1108_26633_15992                                                                                                                                                                                  |   |   |   |   |   |   |   |   |   |   |   |   |   |   |   |   |   |   |   |   |   |   |    |   |   |   |   |
| T---AC---GT-AG-GGA-----GCA-A-G-----C-G-T---T--GT-C-CGG-AT-----TT-A-T-T--GG-GC-----GT-A----AA-GA-GC-TC-----G-TA-G-G-C-G-----G--T-TC-G-G-T-----                                                                                 |   |   |   |   |   |   |   |   |   |   |   |   |   |   |   |   |   |   |   |   |   |   |    |   |   |   |   |
| -----AA----G-T-C-G-----G-G-T--G--TG--A-AA-AC--T-C-TG-G-G-----CT-C-AA-----C-C-C-G-G-A-G-A-----G-G-CC-A--C--T-----C-GA-T-A--C-----T--G-C--CG-TG-A-C---T-T-G-A-G-T--C---T-GG-----TA-G-G-----G-G-A-G--CA-C-----GG--A--ATT----     |   |   |   |   |   |   |   |   |   |   |   |   |   |   |   |   |   |   |   |   |   |   |    |   |   |   |   |
| C-C-T-G-GT--GT-A-G-CG-GT--G---A--A---TG-C-AC-AG--AT-A-TC--A-G--G-A-G-G-A-AC-A-CC---GG--T--G--GC-GAA-G--G-C-G-----G--T-G-C-T---CTG--G--GC-C-A-----G-T---A-C-T--GA--CG-C-T-G--A-GG--A-G-CG-A--AA-G-C---G-TG--                   |   |   |   |   |   |   |   |   |   |   |   |   |   |   |   |   |   |   |   |   |   |   |    |   |   |   |   |
| GG-G--AG-C-G-AA-----CA--GG Bacteria(100);unclassified(100);unclassified(100);unclassified(100);unclassified(100);unclassified(100);unclassified(100);unclassified(100);unclassified(100);                                     |   |   |   |   |   |   |   |   |   |   |   |   |   |   |   |   |   |   |   |   |   |   |    |   |   |   |   |
| Otu1481                                                                                                                                                                                                                       | 0 | 0 | 0 | 0 | 0 | 0 | 0 | 0 | 0 | 0 | 0 | 0 | 0 | 0 | 0 | 0 | 0 | 0 | 0 | 0 | 0 | 0 | 0  | 0 | 0 | 0 | 0 |
|                                                                                                                                                                                                                               | 0 | 0 | 0 | 0 | 0 | 0 | 0 | 0 | 0 | 0 | 0 | 0 | 0 | 0 | 0 | 0 | 0 | 0 | 0 | 0 | 0 | 0 | 93 | 0 | 0 | 0 | 0 |
|                                                                                                                                                                                                                               | 0 | 0 | 0 | 0 | 0 | 0 | 0 | 0 | 0 | 0 | 0 | 0 | 0 | 0 | 0 | 0 | 0 | 0 | 0 | 0 | 0 | 0 | 0  | 0 | 0 | 0 | 0 |
|                                                                                                                                                                                                                               | 0 | 0 | 0 | 0 | 0 | 0 | 0 | 0 | 0 | 0 | 0 | 0 | 0 | 0 | 0 | 0 | 0 | 0 | 0 | 0 | 0 | 0 | 0  | 0 | 0 |   |   |
| M02255_77_000000000-ADUT3_1_1104_12857_17142                                                                                                                                                                                  |   |   |   |   |   |   |   |   |   |   |   |   |   |   |   |   |   |   |   |   |   |   |    |   |   |   |   |
| T---AC---GG-AG-GGA-----GCT-A-G-----C-G-T---T--GT-T-CGG-AA-----AT-A--C-T--GG-GC-----GT-A----AA-GC-GC-AC-----G-TA-G-G-C-G-----G--C-TA-T-C-T-----                                                                                |   |   |   |   |   |   |   |   |   |   |   |   |   |   |   |   |   |   |   |   |   |   |    |   |   |   |   |
| -----AA----G-T-C-A-----G-G-G--G--TG--A-AA-TC--C-C-GG-A-G-----CT-C-AA-----C-T-C-C-G-G-A-A-C---T-G--C-C---T--T-----T-GA-A-A--C-----T--G-G--AT--G-G-C---T-A-G-A-A-T--C---T-TG-----GA-G-A-----G-G-C-G--AG-T-----GG--A--ATT-----C- |   |   |   |   |   |   |   |   |   |   |   |   |   |   |   |   |   |   |   |   |   |   |    |   |   |   |   |
| C-G-A-GT--GT-A-G-AG-GT--G---A--A---TT-C-GT-AG--AT-A-TT--C-G--G-A-A-G-A-AC-A-CC---AG--T--G--GC-GAA-G--G-C-G-----A--C-T-C-G---CTG--G--AC-A-A-----G-T---A-T-T--GA--CG-C-T-G--A-GG--T-G-CG-A--AA-G-C---G-TG--GG-                  |   |   |   |   |   |   |   |   |   |   |   |   |   |   |   |   |   |   |   |   |   |   |    |   |   |   |   |
| G--AG-C-A-AA-----CA--GG Bacteria(100);Proteobacteria(100);Alphaproteobacteria(100);Sphingomonadales(100);unclassified(100);unclassified(100);unclassified(100);unclassified(100);unclassified(100);                           |   |   |   |   |   |   |   |   |   |   |   |   |   |   |   |   |   |   |   |   |   |   |    |   |   |   |   |
| Otu1482                                                                                                                                                                                                                       | 0 | 0 | 0 | 0 | 0 | 0 | 0 | 0 | 0 | 0 | 0 | 0 | 0 | 0 | 0 | 0 | 0 | 0 | 0 | 0 | 0 | 0 | 0  | 0 | 0 | 0 | 0 |
|                                                                                                                                                                                                                               | 0 | 0 | 0 | 0 | 0 | 0 | 0 | 0 | 0 | 0 | 0 | 0 | 0 | 0 | 0 | 0 | 0 | 0 | 0 | 0 | 0 | 0 | 30 | 0 | 0 | 0 | 0 |
|                                                                                                                                                                                                                               | 0 | 0 | 0 | 0 | 0 | 0 | 0 | 0 | 0 | 0 | 0 | 0 | 0 | 0 | 0 | 0 | 0 | 0 | 0 | 0 | 0 | 0 | 0  | 0 | 0 | 0 | 0 |
|                                                                                                                                                                                                                               | 0 | 0 | 0 | 0 | 0 | 0 | 0 | 0 | 0 | 0 | 0 | 0 | 0 | 0 | 0 | 0 | 0 | 0 | 0 | 0 | 0 | 0 | 0  | 0 | 0 |   |   |
| M02255_77_000000000-ADUT3_1_1103_21944_16789                                                                                                                                                                                  |   |   |   |   |   |   |   |   |   |   |   |   |   |   |   |   |   |   |   |   |   |   |    |   |   |   |   |
| T---AC---GT-AG-GGG-----GCG-A-A-----C-G-T---T--AT-C-CGG-AA-----TG-A--T-T--GG-GC-----GT-A----AA-GG-GT-AC-----G-TA-G-G-C-G-----G--A-CC-T-G-T-----                                                                                |   |   |   |   |   |   |   |   |   |   |   |   |   |   |   |   |   |   |   |   |   |   |    |   |   |   |   |
| -----AA----G-T-C-A-----G-G-T--G--TG--A-AA-GG--C-A-TG-G-G-----CT-C-AA-----C-C-C-A-T-G-T-A-----A-G--C-A--C--T-----T--GA-A-A--C-----T--G-C--GG--G-C-C---T-T-G-A-G-G--G---A-AG-----GA-G-A-----G-G-T-A--AG-T-----GG--A--ATT-----   |   |   |   |   |   |   |   |   |   |   |   |   |   |   |   |   |   |   |   |   |   |   |    |   |   |   |   |
| C-C-T-A-GT--GT-A-G-CG-GT--G---A--A---TG-C-GT-AG--AT-A-TT--A-G--G-A-G-G-A-AT-A-CC---GG--T--G--GC-GAA-G--G-C-G-----A--C-T-T-A---CTG--G--AC-T-T-----T-T---A-C-T--GA--CG-C-T-G--A-GG--T-A-CG-A--AA-G-C---G-TG--GG-                |   |   |   |   |   |   |   |   |   |   |   |   |   |   |   |   |   |   |   |   |   |   |    |   |   |   |   |
| G--AG-C-A-AA-----CA--GG Bacteria(100);Firmicutes(100);Clostridia(100);Clostridiales(100);Family_XI_Incertae_Sedis(100);uncultured(100);unclassified(100);unclassified(100);unclassified(100);                                 |   |   |   |   |   |   |   |   |   |   |   |   |   |   |   |   |   |   |   |   |   |   |    |   |   |   |   |
| Otu1483                                                                                                                                                                                                                       | 0 | 0 | 0 | 0 | 0 | 0 | 0 | 0 | 0 | 0 | 0 | 0 | 0 | 0 | 0 | 0 | 0 | 0 | 0 | 0 | 0 | 0 | 0  | 0 | 0 | 0 | 0 |
|                                                                                                                                                                                                                               | 0 | 0 | 0 | 0 | 0 | 0 | 0 | 0 | 0 | 0 | 0 | 0 | 0 | 0 | 0 | 0 | 0 | 0 | 0 | 0 | 0 | 0 | 34 | 0 | 0 | 0 | 0 |
|                                                                                                                                                                                                                               | 0 | 0 | 0 | 0 | 0 | 0 | 0 | 0 | 0 | 0 | 0 | 0 | 0 | 0 | 0 | 0 | 0 | 0 | 0 | 0 | 0 | 0 | 0  | 0 | 0 | 0 | 0 |
|                                                                                                                                                                                                                               | 0 | 0 | 0 | 0 | 0 | 0 | 0 | 0 | 0 | 0 | 0 | 0 | 0 | 0 | 0 | 0 | 0 | 0 | 0 | 0 | 0 | 0 | 0  | 0 | 0 |   |   |
| M02255_77_000000000-ADUT3_1_1102_21199_18226                                                                                                                                                                                  |   |   |   |   |   |   |   |   |   |   |   |   |   |   |   |   |   |   |   |   |   |   |    |   |   |   |   |
| T---AC---GT-AT-GGA-----GCA-A-G-----C-G-T---T--AT-C-CGG-AT-----TT-A--C-T--GG-GT-----GT-A----AA-GG-GA-GC-----G-TA-G-A-C-G-----G--C-AT-G-G-C-----                                                                                |   |   |   |   |   |   |   |   |   |   |   |   |   |   |   |   |   |   |   |   |   |   |    |   |   |   |   |
| -----AA----G-T-C-T-----G-A-T--G--TGA-A-A-AC--C-C-TG-G-G-----CT-C-AA-----C-C-C-G-G-G-G--A-C---T-G--C-A---T--T-----G--GA-A-A--C-----T--G-T--TA--A-G-C---T-A-G-A-G-T--G---C-AG-----GA-G-A-----G-G-T-A--AG-T-----GG--A--ATT-----  |   |   |   |   |   |   |   |   |   |   |   |   |   |   |   |   |   |   |   |   |   |   |    |   |   |   |   |
| C-C-T-A-GT--GT-A-G-CG-GT--G---A--A---TG-C-GT-AG--AT-A-TT--A-G--G-A-G-G-A-AC-A-CC---AG--T--G--GC-GAA-G--G-C-G-----G--C-T-T-A---CTG--G--AC-T-G-----T-A---A-C-T--GA--CG-T-T-G--A-GG--C-T-CG-A--AA-G-C---G-TG--GG-                |   |   |   |   |   |   |   |   |   |   |   |   |   |   |   |   |   |   |   |   |   |   |    |   |   |   |   |
| G--AG-C-A-AA-----CA--GG Bacteria(100);Firmicutes(100);Clostridia(100);Clostridiales(100);Lachnospiraceae(100);unclassified(100);unclassified(100);unclassified(100);unclassified(100);                                        |   |   |   |   |   |   |   |   |   |   |   |   |   |   |   |   |   |   |   |   |   |   |    |   |   |   |   |
| Otu1484                                                                                                                                                                                                                       | 0 | 0 | 0 | 0 | 0 | 0 | 0 | 0 | 0 | 0 | 0 | 0 | 0 | 0 | 0 | 0 | 0 | 0 | 0 | 0 | 0 | 0 | 0  | 0 | 0 | 0 | 0 |
|                                                                                                                                                                                                                               | 0 | 0 | 0 | 0 | 0 | 0 | 0 | 0 | 0 | 0 | 0 | 0 | 0 | 0 | 0 | 0 | 0 | 0 | 0 | 0 | 0 | 0 | 24 | 0 | 0 | 0 | 0 |
|                                                                                                                                                                                                                               | 0 | 0 | 0 | 0 | 0 | 0 | 0 | 0 | 0 | 0 | 0 | 0 | 0 | 0 | 0 | 0 | 0 | 0 | 0 | 0 | 0 | 0 | 0  | 0 | 0 | 0 | 0 |
|                                                                                                                                                                                                                               | 0 | 0 | 0 | 0 | 0 | 0 | 0 | 0 | 0 | 0 | 0 | 0 | 0 | 0 | 0 | 0 | 0 | 0 | 0 | 0 | 0 | 0 | 0  | 0 | 0 |   |   |
| M02255_77_000000000-ADUT3_1_1101_11582_14431                                                                                                                                                                                  |   |   |   |   |   |   |   |   |   |   |   |   |   |   |   |   |   |   |   |   |   |   |    |   |   |   |   |
| T---AC---GT-AG-GGT-----GCG-A-G-----C-G-T---T--GT-C-CGG-AA-----TT-A--C-T--GG-GC-----GT-A----AA-GA-GC-TC-----G-TA-G-G-T-G-----G--T-TT-G-T-C-----                                                                                |   |   |   |   |   |   |   |   |   |   |   |   |   |   |   |   |   |   |   |   |   |   |    |   |   |   |   |
| -----GC---G-T-T-G-----T-T-C--G--TG--A-AA-AC--T-A-AA-G-G-----CT-T-AA-----C-C-T-T-T-G-G--C-G---T-G--C-G---G--G-----C--GA-T-A--C-----G--G-G--CA--G-A-C---T-G-G-A-G-T--A--C-TG-----CA-G-G-----G-G-A-G--AC-T-----GG--A--ATT-----C- |   |   |   |   |   |   |   |   |   |   |   |   |   |   |   |   |   |   |   |   |   |   |    |   |   |   |   |
| C-T-G-GT--GT-A-G-CG-GT--G---G--A-A---TG-C-GC-AG--AT-A-TC--A-G--G-A-G-G-A-AC-A-CC---GG--T--G--GC-GAA-G--G-C-G-----G--G-T-C-T---CTG--G--GC-A-G-----T-A---A-C-T--GA--CG-C-T-G--A-GG--A-G-CG-A--AA-G-C---G-TG--GG-                |   |   |   |   |   |   |   |   |   |   |   |   |   |   |   |   |   |   |   |   |   |   |    |   |   |   |   |
| G--AG-C-G-AA-----CA--GG Bacteria(100);Actinobacteria(100);Actinobacteria(100);Actinobacteridae(100);Actinomycetales(100);Corynebacterineae(100);unclassified(100);unclassified(100);unclassified(100);                        |   |   |   |   |   |   |   |   |   |   |   |   |   |   |   |   |   |   |   |   |   |   |    |   |   |   |   |



|                                                                                                                                                                                                                   |   |   |   |   |   |   |   |   |   |   |   |   |   |   |   |   |   |   |   |   |   |    |   |   |   |   |
|-------------------------------------------------------------------------------------------------------------------------------------------------------------------------------------------------------------------|---|---|---|---|---|---|---|---|---|---|---|---|---|---|---|---|---|---|---|---|---|----|---|---|---|---|
| Otu1485                                                                                                                                                                                                           | 0 | 0 | 0 | 0 | 0 | 0 | 0 | 0 | 0 | 0 | 0 | 0 | 0 | 0 | 0 | 0 | 0 | 0 | 0 | 0 | 0 | 0  | 0 | 0 | 0 | 0 |
|                                                                                                                                                                                                                   | 0 | 0 | 0 | 0 | 0 | 0 | 0 | 0 | 0 | 0 | 0 | 0 | 0 | 0 | 0 | 0 | 0 | 0 | 0 | 0 | 0 | 53 | 0 | 0 | 0 | 0 |
|                                                                                                                                                                                                                   | 0 | 0 | 0 | 0 | 0 | 0 | 0 | 0 | 0 | 0 | 0 | 0 | 0 | 0 | 0 | 0 | 0 | 0 | 0 | 0 | 0 | 0  | 0 | 0 | 0 | 0 |
|                                                                                                                                                                                                                   | 0 | 0 | 0 | 0 | 0 | 0 | 0 | 0 | 0 | 0 | 0 | 0 | 0 | 0 | 0 | 0 | 0 | 0 | 0 | 0 | 0 | 0  | 0 | 0 | 0 | 0 |
| M02255_77_000000000-ADUT3_1_1101_5096_11408 T---AC---GT-AG-GGA-----GCA-A-G-----C-G--T---T-GT-C-CGG-AA-----TC-A-T-T-GG-GC-----GT-A----AA-GG-GC-GC-----G-TA-G-G-C-G-----G-T-CT-G-G-T-----                           |   |   |   |   |   |   |   |   |   |   |   |   |   |   |   |   |   |   |   |   |   |    |   |   |   |   |
| AA---G-T-C-A-----A-A-T--G--TG--A-AA-TG--C-A-CA-G-G----CT-T-AA-----C-C-T-G-T-G--A-GC--T-G-C-G--T-T-----T-GA-A-A--C-----T-G-T--CA-G-A-C---T-G-G-A-G-A-T--C-AG----GA-G-A-----G-G-A-A--AG-T----GG-A-ATT---C-C-T-      |   |   |   |   |   |   |   |   |   |   |   |   |   |   |   |   |   |   |   |   |   |    |   |   |   |   |
| A-GT--GT-A-G-CG-GT--G---A-A-A---TG-C-GT-AG--AT-A-TT--A-G-G-A-A-G-A-AC-A-TC---AA-T-G-GC-GAA-G--G-C-A-----G-C-T-T-T---CTG--G--CC-T-G-----A-A--A-C-T--GA-CG-C-T-G--A-GG--C-G-CG-A--AA-G-C---G-TG--GG-G--             |   |   |   |   |   |   |   |   |   |   |   |   |   |   |   |   |   |   |   |   |   |    |   |   |   |   |
| AG-C-A-AA-----CA--GG Bacteria(100);unclassified(100);unclassified(100);unclassified(100);unclassified(100);unclassified(100);unclassified(100);unclassified(100);unclassified(100);                               |   |   |   |   |   |   |   |   |   |   |   |   |   |   |   |   |   |   |   |   |   |    |   |   |   |   |
| Otu1486                                                                                                                                                                                                           | 0 | 0 | 0 | 0 | 0 | 0 | 0 | 0 | 0 | 0 | 0 | 0 | 0 | 0 | 0 | 0 | 0 | 0 | 0 | 0 | 0 | 0  | 0 | 0 | 0 | 0 |
|                                                                                                                                                                                                                   | 0 | 0 | 0 | 0 | 0 | 0 | 0 | 0 | 0 | 0 | 0 | 0 | 0 | 0 | 0 | 0 | 0 | 0 | 0 | 0 | 0 | 18 | 0 | 0 | 0 | 0 |
|                                                                                                                                                                                                                   | 0 | 0 | 0 | 0 | 0 | 0 | 0 | 0 | 0 | 0 | 0 | 0 | 0 | 0 | 0 | 0 | 0 | 0 | 0 | 0 | 0 | 0  | 0 | 0 | 0 | 0 |
|                                                                                                                                                                                                                   | 0 | 0 | 0 | 0 | 0 | 0 | 0 | 0 | 0 | 0 | 0 | 0 | 0 | 0 | 0 | 0 | 0 | 0 | 0 | 0 | 0 | 0  | 0 | 0 | 0 | 0 |
| M02255_76_000000000-ADUNE_1_1102_18935_7879 T---AC---AA-AG-GAT-----GCA-A-G-----T-G--T---T--AT-C-AAG-AA-----TG-A-T-T-GG-GT-----GT-A----AA-GT-GT--TT-----G-TA-G-G-T-G-----A-C-TT-T-T-T-----AA---                    |   |   |   |   |   |   |   |   |   |   |   |   |   |   |   |   |   |   |   |   |   |    |   |   |   |   |
| -G-T-C-C-----G-C-C--G--TC--A-AA-TC---C-----G-----A-----C-----A---A---G-T-G--G-T-----G--GA-A-A--C-----T-A-C--CA--A-G-C---T-G-G-A-G-T-A--C-AA---TA-G-G-----G-G-C-A--TA-G-----GG--A-ATT---T-C-T-A-GT--GG-A-G-        |   |   |   |   |   |   |   |   |   |   |   |   |   |   |   |   |   |   |   |   |   |    |   |   |   |   |
| TG-GT--G---A-A-A---TA-T-GT-AG--AG-A-TC--A-T--A-A-A-G-A-AC-A-CC---AA-T-G-AA-GAA-A-G-C-A-----C-T-T-T-G---TTG--G-GC-C-G-----A-C--A-T-T-GA-CA-T-T-G--A-GA--G-A-CG-A--AA-G-C---T-AG--GG-G--AG-T-G-AA-----              |   |   |   |   |   |   |   |   |   |   |   |   |   |   |   |   |   |   |   |   |   |    |   |   |   |   |
| TG--AG Bacteria(100);unclassified(100);unclassified(100);unclassified(100);unclassified(100);unclassified(100);unclassified(100);unclassified(100);unclassified(100);                                             |   |   |   |   |   |   |   |   |   |   |   |   |   |   |   |   |   |   |   |   |   |    |   |   |   |   |
| Otu1487                                                                                                                                                                                                           | 0 | 0 | 0 | 0 | 0 | 0 | 0 | 0 | 0 | 0 | 0 | 0 | 0 | 0 | 0 | 0 | 0 | 0 | 0 | 0 | 0 | 0  | 0 | 0 | 0 | 0 |
|                                                                                                                                                                                                                   | 0 | 0 | 0 | 0 | 0 | 0 | 0 | 0 | 0 | 0 | 0 | 0 | 0 | 0 | 0 | 0 | 0 | 0 | 0 | 0 | 8 | 0  | 0 | 0 | 0 | 0 |
|                                                                                                                                                                                                                   | 0 | 0 | 0 | 0 | 0 | 0 | 0 | 0 | 0 | 0 | 0 | 0 | 0 | 0 | 0 | 0 | 0 | 0 | 0 | 0 | 0 | 0  | 0 | 0 | 0 | 0 |
|                                                                                                                                                                                                                   | 0 | 0 | 0 | 0 | 0 | 0 | 0 | 0 | 0 | 0 | 0 | 0 | 0 | 0 | 0 | 0 | 0 | 0 | 0 | 0 | 0 | 0  | 0 | 0 | 0 | 0 |
| M02255_77_000000000-ADUT3_1_1109_4041_18703 G---AC---GG-AG-GGT-----GCT-A-G-----C-G--T---T-GT-T-CGG-AA-----TC-A-C-T-GG-GC-----GT-A----AA-GG-GC-GC-----G-TA-G-G-C-G-----G-C-CT-T-T-G-----                           |   |   |   |   |   |   |   |   |   |   |   |   |   |   |   |   |   |   |   |   |   |    |   |   |   |   |
| GT---G-T-C-G-----G-A-T--G--TG--A-AA-GC--C-C-GG-G-G----CT-C-AA-----C-T-C-C-G-G-A--G-G---T-G-C-A---T-C-----C-GA-A-A--C-----T-C-A-GG--G-G-C---T-C-G-A-G-G-C---C-GG----AA-G-A-----G-G-A-G---GG-T-----GG--A-ATA---C-C- |   |   |   |   |   |   |   |   |   |   |   |   |   |   |   |   |   |   |   |   |   |    |   |   |   |   |
| C-A-GT--GT-A-G-AG-GT--G---A-A-A---TT-C-GT-AG--AT-A-TT--G-G--G-T-G-G-A-AC-A-CC--GG--T--G-GC-GAA-A-G-C-G-----G-C-T-C-T---CTG--G--TC-C-G-----G-T---C-C-T--GA-CG-C-T-G--A-GG--C-G-CG-A--AA-G-C---G-T-G-GG-G--         |   |   |   |   |   |   |   |   |   |   |   |   |   |   |   |   |   |   |   |   |   |    |   |   |   |   |
| AG-C-A-AA-----CA--GG Bacteria(100);Proteobacteria(100);Alphaproteobacteria(100);Rhodospirillales(100);unclassified(100);unclassified(100);unclassified(100);unclassified(100);unclassified(100);                  |   |   |   |   |   |   |   |   |   |   |   |   |   |   |   |   |   |   |   |   |   |    |   |   |   |   |
| Otu1488                                                                                                                                                                                                           | 0 | 0 | 0 | 0 | 0 | 0 | 0 | 0 | 0 | 0 | 0 | 0 | 0 | 0 | 0 | 0 | 0 | 0 | 0 | 0 | 0 | 0  | 0 | 0 | 0 | 0 |
|                                                                                                                                                                                                                   | 0 | 0 | 0 | 0 | 0 | 0 | 0 | 0 | 0 | 0 | 0 | 0 | 0 | 0 | 0 | 0 | 0 | 0 | 0 | 0 | 9 | 0  | 0 | 0 | 0 | 0 |
|                                                                                                                                                                                                                   | 0 | 0 | 0 | 0 | 0 | 0 | 0 | 0 | 0 | 0 | 0 | 0 | 0 | 0 | 0 | 0 | 0 | 0 | 0 | 0 | 0 | 0  | 0 | 0 | 0 | 0 |
|                                                                                                                                                                                                                   | 0 | 0 | 0 | 0 | 0 | 0 | 0 | 0 | 0 | 0 | 0 | 0 | 0 | 0 | 0 | 0 | 0 | 0 | 0 | 0 | 0 | 0  | 0 | 0 | 0 | 0 |
| M02255_76_000000000-ADUNE_1_2119_27979_18851 T---CG--GC-TA-ACT-----CCG-T-G-----C-C-A--G--CA-G-CCG-CG-----GT-A-A-T-AC-GG-----AG--G---AT-CC-AA-GC-----GTGA-T-C-C-G-----GA-T-TT-A-T-T-----                           |   |   |   |   |   |   |   |   |   |   |   |   |   |   |   |   |   |   |   |   |   |    |   |   |   |   |
| -----AA---G-T-C-A-----G-G-G--G--TG--A-AA                                                                                                                                                                          |   |   |   |   |   |   |   |   |   |   |   |   |   |   |   |   |   |   |   |   |   |    |   |   |   |   |



|                                                                                                                                                                                                                            |   |   |   |    |   |   |   |   |   |   |   |   |   |   |   |   |   |   |   |   |    |   |   |   |   |   |   |
|----------------------------------------------------------------------------------------------------------------------------------------------------------------------------------------------------------------------------|---|---|---|----|---|---|---|---|---|---|---|---|---|---|---|---|---|---|---|---|----|---|---|---|---|---|---|
| Otu1490                                                                                                                                                                                                                    | 0 | 0 | 0 | 0  | 0 | 0 | 0 | 0 | 0 | 0 | 0 | 0 | 0 | 0 | 0 | 0 | 0 | 0 | 0 | 0 | 0  | 0 | 0 | 0 | 0 | 0 | 0 |
|                                                                                                                                                                                                                            | 0 | 0 | 0 | 0  | 0 | 0 | 0 | 0 | 0 | 0 | 0 | 0 | 0 | 0 | 0 | 0 | 0 | 0 | 0 | 0 | 0  | 0 | 0 | 4 | 0 | 0 | 0 |
|                                                                                                                                                                                                                            | 0 | 0 | 0 | 0  | 0 | 0 | 0 | 0 | 0 | 0 | 0 | 0 | 3 | 0 | 0 | 0 | 0 | 0 | 0 | 0 | 0  | 0 | 0 | 0 | 0 | 0 | 0 |
|                                                                                                                                                                                                                            | 0 | 0 | 0 | 0  | 0 | 0 | 0 | 0 | 0 | 0 | 0 | 0 | 0 | 0 | 0 | 0 | 0 | 0 | 0 | 0 | 0  | 0 | 0 | 0 | 0 |   |   |
| M02255_77_000000000-ADUT3_1_1114_7894_24450 T---AC---GTGCC-AGC-----AGC-C-G-----C--G--G--T-AA-TACGT-AG-----GG-T--G-C--AA-GC-----GT--T----AATCGGAATTA-----C-TG-G-G-C-G-----G--T-TT-T-G-T-----                                |   |   |   |    |   |   |   |   |   |   |   |   |   |   |   |   |   |   |   |   |    |   |   |   |   |   |   |
| AA---G-T-C-T-----G-A-T--G-TG--A-AA-TC--C-C-CG-G-G----CT-C-AA-----C-C-T-G-G-G-A--A-T---T-G--C-A--T--T-----G--GA-G-A--C-----T-G-C-AA--G-G-C---T-A-G-A-A-T--C---T-GG-----CA-G-A-----G-G-G-G---GG-T-----AG--A--ATT---C-C-A-    |   |   |   |    |   |   |   |   |   |   |   |   |   |   |   |   |   |   |   |   |    |   |   |   |   |   |   |
| C-GT--GT-A-G-CA-GT--G---A--A--TG-C-GT-AG--AT-A-TG--T-G--G-A-G-G-A-AC-A-CC--GA--T--G--GC-GAA-G--G-C--A-----G--C-C-C-C---CTG--G--GT-C-A-----A-G---A-T-T--GA--CG-C-T-C--A-TG--C-A-CG-A--AA-G-C---G-TG--GG-G--                 |   |   |   |    |   |   |   |   |   |   |   |   |   |   |   |   |   |   |   |   |    |   |   |   |   |   |   |
| AG-C-A-AA-----CA--GG Bacteria(100);Proteobacteria(100);Betaproteobacteria(100);Burkholderiales(100);Oxalobacteraceae(100);Janthinobacterium(100);unclassified(100);unclassified(100);unclassified(100);                    |   |   |   |    |   |   |   |   |   |   |   |   |   |   |   |   |   |   |   |   |    |   |   |   |   |   |   |
| Otu1491                                                                                                                                                                                                                    | 0 | 0 | 0 | 0  | 0 | 0 | 0 | 0 | 0 | 0 | 0 | 0 | 0 | 0 | 0 | 0 | 0 | 0 | 0 | 0 | 0  | 0 | 0 | 0 | 0 | 0 | 0 |
|                                                                                                                                                                                                                            | 0 | 0 | 0 | 0  | 0 | 0 | 0 | 0 | 0 | 0 | 0 | 0 | 0 | 0 | 0 | 0 | 0 | 0 | 0 | 0 | 0  | 4 | 0 | 0 | 0 | 0 | 0 |
|                                                                                                                                                                                                                            | 0 | 0 | 0 | 0  | 0 | 0 | 0 | 0 | 0 | 0 | 0 | 0 | 0 | 0 | 0 | 0 | 0 | 0 | 0 | 0 | 0  | 0 | 0 | 0 | 0 | 0 | 0 |
|                                                                                                                                                                                                                            | 0 | 0 | 0 | 25 | 0 | 0 | 0 | 0 | 0 | 0 | 0 | 0 | 0 | 0 | 0 | 0 | 0 | 0 | 0 | 0 | 0  | 0 | 0 | 0 | 0 |   |   |
| M02255_77_000000000-ADUT3_1_1119_16297_19108 T---AC---GA-AG-GGG-----GCT-A-G-----C--G--T--T--GT-T-CGG-AA-----TG-A--C-T--GG-GC-----GT--A----AA-GG-GC-GC-----G-TA-G-G-C-G-----G--T-TT-G-T-C----                               |   |   |   |    |   |   |   |   |   |   |   |   |   |   |   |   |   |   |   |   |    |   |   |   |   |   |   |
| -----AA---G-T-T-G-----G-G-G--G-TG--A-AA-TC--C-C-GG-G-G----CT-T-AA-----C-C-T-C-G-G-A--A-T---T-G--C-C--T--T-----C--AA-G-A--C-----T-G-G--CA--G-G-C---T-G-G-A-G-T--A---T-GG-----AA-G-A-----G-G-G-T---CG-T-----GG--A--ATT---    |   |   |   |    |   |   |   |   |   |   |   |   |   |   |   |   |   |   |   |   |    |   |   |   |   |   |   |
| C-C-C-A-GT--GT-A-G-AG-GT--G---A--A--TT-C-GT-AG--AT-A-TT--G-G--G-A-A-G-A-AC-A-CC--GG--T--G--GC-GAA-G--G-C--G-----G--C-G-A-C---CTG--G--TC-C-A-----T-T---A-C-T--GA--CG-C-T-G--A-GG--C-G-CG-A--CA-G-C---G-TG--GG-              |   |   |   |    |   |   |   |   |   |   |   |   |   |   |   |   |   |   |   |   |    |   |   |   |   |   |   |
| G--AG-C-A-AA-----CA--GG Bacteria(100);Proteobacteria(100);Alphaproteobacteria(100);Rhodospirillales(100);unclassified(100);unclassified(100);unclassified(100);unclassified(100);unclassified(100);                        |   |   |   |    |   |   |   |   |   |   |   |   |   |   |   |   |   |   |   |   |    |   |   |   |   |   |   |
| Otu1492                                                                                                                                                                                                                    | 0 | 0 | 0 | 0  | 0 | 0 | 0 | 0 | 0 | 0 | 0 | 0 | 0 | 0 | 0 | 0 | 0 | 0 | 0 | 0 | 0  | 0 | 0 | 0 | 0 | 0 | 0 |
|                                                                                                                                                                                                                            | 0 | 0 | 0 | 0  | 0 | 0 | 0 | 0 | 0 | 0 | 0 | 0 | 0 | 0 | 0 | 0 | 0 | 0 | 0 | 0 | 10 | 0 | 0 | 0 | 0 | 0 | 0 |
|                                                                                                                                                                                                                            | 0 | 0 | 0 | 0  | 0 | 0 | 0 | 0 | 0 | 0 | 0 | 0 | 0 | 0 | 0 | 0 | 0 | 0 | 0 | 0 | 0  | 0 | 0 | 0 | 0 | 0 | 0 |
|                                                                                                                                                                                                                            | 0 | 0 | 0 | 0  | 0 | 0 | 0 | 0 | 0 | 0 | 0 | 0 | 0 | 0 | 0 | 0 | 0 | 0 | 0 | 0 | 0  | 0 | 0 | 0 | 0 |   |   |
| M02255_76_000000000-ADUNE_1_1106_25558_22587 C---TA---AC-TC-CGT-----GCC-A-G-----C---A--G--CC-G-CGG-TA-----AT-A--C-G--GG-GG-----GG--G---CA-AG-CG-TT-----G-T---T-C-G-----G--A-CA-A-C-T-----                                  |   |   |   |    |   |   |   |   |   |   |   |   |   |   |   |   |   |   |   |   |    |   |   |   |   |   |   |
| ---AA---G-T-C-A-----G-A-C--G--TG--A-AA-TC--C-C-TC-G-G----CT-T-AA-----C-C-G-G-G-G-A--A-C---T-G--C-G--T--C-----T--GA-T-A--C-----T-G-G--AT--G-G-C---T-T-G-A-G-A--T---T-GG-----GA-G-A-----G-G-G-A--TG-C-----GG--A--ATT---C-C-  |   |   |   |    |   |   |   |   |   |   |   |   |   |   |   |   |   |   |   |   |    |   |   |   |   |   |   |
| A-G-GT--GT-A-G-CG-GT--G---A--A--TG-C-GT-AG--AT-A-TC--T-G--G-A-G-G-A-AC-A-CC--GG--T--G--GC-GAA-G--G-C--G-----G--C-A-T-C---CTG--G--AC-C-A-----A-C---A-C-T--GA--CG-C-T-G--A-GG--A-G-CG-A--AA-G-C---C-AG--GG-G--               |   |   |   |    |   |   |   |   |   |   |   |   |   |   |   |   |   |   |   |   |    |   |   |   |   |   |   |
| AG-C-A-AA-----CG--GG Bacteria(100);Acidobacteria(100);Acidobacteria(100);Acidobacteriales(100);Acidobacteriaceae(100);uncultured(100);unclassified(100);unclassified(100);unclassified(100);                               |   |   |   |    |   |   |   |   |   |   |   |   |   |   |   |   |   |   |   |   |    |   |   |   |   |   |   |
| Otu1493                                                                                                                                                                                                                    | 0 | 0 | 0 | 0  | 0 | 0 | 0 | 0 | 0 | 0 | 0 | 0 | 0 | 0 | 0 | 0 | 0 | 0 | 0 | 0 | 0  | 0 | 0 | 0 | 0 | 0 | 0 |
|                                                                                                                                                                                                                            | 0 | 0 | 0 | 0  | 0 | 0 | 0 | 0 | 0 | 0 | 0 | 0 | 0 | 0 | 0 | 0 | 0 | 0 | 0 | 0 | 7  | 0 | 0 | 0 | 0 | 0 | 0 |
|                                                                                                                                                                                                                            | 0 | 0 | 0 | 0  | 0 | 0 | 0 | 0 | 0 | 0 | 0 | 0 | 0 | 0 | 0 | 0 | 0 | 0 | 0 | 0 | 0  | 0 | 0 | 0 | 0 | 0 | 0 |
|                                                                                                                                                                                                                            | 0 | 0 | 0 | 0  | 0 | 0 | 0 | 0 | 0 | 0 | 0 | 0 | 0 | 0 | 0 | 0 | 0 | 0 | 0 | 0 | 0  | 0 | 0 | 0 | 0 |   |   |
| M02255_77_000000000-ADUT3_1_2112_12348_16566 C---CG---GC-TA-ACT-----CCG-T-G-----C--C--A--G--CA-G-CCG-CG-----GT-A--A-T--AC-GG-----AG--G---GT-GC-AA-GC-----G-TT-GTC-C-G-----G--A-TT-C-A-T-----                               |   |   |   |    |   |   |   |   |   |   |   |   |   |   |   |   |   |   |   |   |    |   |   |   |   |   |   |
| -----AA---G-T-C-C-----G-T-G--G-TG--A-AA-GC--C-A-AC-A-G----CT-C-AA-----C-T-G-T-T-G-A--A-C---T-G--C-C--A--T-----G--GA-T-A--C-----T-G-T--GA--G-G-C---T-T-G-A-G-T--A---C-AG-----AC-G-A-----G-G-T-A--GG-C-----GG--A--ATG---     |   |   |   |    |   |   |   |   |   |   |   |   |   |   |   |   |   |   |   |   |    |   |   |   |   |   |   |
| G-A-T-C-GT--GT-A-G-CG-GT--G---A--A--TG-C-AT-AG--AT-A-CG--A-T--C-C-A-G-A-AC-T-CC--GA--T--T--GC-GAA-G--G-C--A-----G--C-T-T-A---CTA--G--GC-T-G-----T-A---A-C-T--GA--CG-C-T-G--A-GG--C-A-CG-A--AA-G-C---G-TG--GG-              |   |   |   |    |   |   |   |   |   |   |   |   |   |   |   |   |   |   |   |   |    |   |   |   |   |   |   |
| G--AG-C-G-AA-----CA--GG Bacteria(100);Bacteroidetes(100);Sphingobacteria(100);Sphingobacteriales(100);unclassified(100);unclassified(100);unclassified(100);unclassified(100);unclassified(100);                           |   |   |   |    |   |   |   |   |   |   |   |   |   |   |   |   |   |   |   |   |    |   |   |   |   |   |   |
| Otu1494                                                                                                                                                                                                                    | 0 | 0 | 0 | 0  | 0 | 0 | 0 | 0 | 0 | 0 | 0 | 0 | 0 | 0 | 0 | 0 | 0 | 0 | 0 | 0 | 0  | 0 | 0 | 0 | 0 | 0 | 0 |
|                                                                                                                                                                                                                            | 0 | 0 | 0 | 0  | 0 | 0 | 0 | 0 | 0 | 0 | 0 | 0 | 0 | 0 | 0 | 0 | 0 | 0 | 0 | 0 | 7  | 0 | 0 | 0 | 0 | 0 | 0 |
|                                                                                                                                                                                                                            | 0 | 0 | 0 | 0  | 0 | 0 | 0 | 0 | 0 | 0 | 0 | 0 | 0 | 0 | 0 | 0 | 0 | 0 | 0 | 0 | 0  | 0 | 0 | 0 | 0 | 0 | 0 |
|                                                                                                                                                                                                                            | 0 | 0 | 0 | 0  | 0 | 0 | 0 | 0 | 0 | 0 | 0 | 0 | 0 | 0 | 0 | 0 | 0 | 0 | 0 | 0 | 0  | 0 | 0 | 0 | 0 |   |   |
| M02255_76_000000000-ADUNE_1_1104_12629_15171 .....AC---T-A--CGT-----GCC-A-G-----C--A--G---C--CG-C-GGT-AA-----TA-C--G-T--AG-GG-----GG--C---AA-GC-G--TT-----G-TC-C-G---G-----A--T-TA-T-A-C-----                              |   |   |   |    |   |   |   |   |   |   |   |   |   |   |   |   |   |   |   |   |    |   |   |   |   |   |   |
| AG---G-T-C-C-----G-C-T--G--TG--A-AA-AC--T-G-GA-G-G----CT-T-AA-----C-C-T-C-C-A-G--A-C---G-T--C-G--G--T-----G--GA-A-A--C-----C--G-T--AT--G-A-C---T-A-G-A-G-T--C---C-GG-----AA-G-A-----G-G-A-G---AG-T-----GG--A--ATT---C-C-T- |   |   |   |    |   |   |   |   |   |   |   |   |   |   |   |   |   |   |   |   |    |   |   |   |   |   |   |
| G-GT--GT-A-G-CG-GT--G---A--A--TG-C-GC-AG--AT-A-TC--A-G--G-A-A-G-A-AC-A-CC--CG--T--G--GC-GAA-G--G-C--G-----G--C-T-C-T---CTG--G--GA-C-G-----G-T---A-C-T--GA--CG-C-T-G--A-GA--C-G-CG-A--AA-G-C---G-TG--GG-G--                 |   |   |   |    |   |   |   |   |   |   |   |   |   |   |   |   |   |   |   |   |    |   |   |   |   |   |   |
| AG-C-G-AA-----CA--GG Bacteria(100);Actinobacteria(100);Actinobacteria(100);Rubrobacteridae(100);AKIW543(100);unclassified(100);unclassified(100);unclassified(100);unclassified(100);                                      |   |   |   |    |   |   |   |   |   |   |   |   |   |   |   |   |   |   |   |   |    |   |   |   |   |   |   |



|                                                                                                                                                                                                                                                                                                                                                                                                                                                                                                                                                                                                                                                                                                                                                                                                                                      |   |   |   |   |   |   |   |   |   |   |   |   |   |   |   |   |    |   |   |   |   |   |   |   |   |   |   |
|--------------------------------------------------------------------------------------------------------------------------------------------------------------------------------------------------------------------------------------------------------------------------------------------------------------------------------------------------------------------------------------------------------------------------------------------------------------------------------------------------------------------------------------------------------------------------------------------------------------------------------------------------------------------------------------------------------------------------------------------------------------------------------------------------------------------------------------|---|---|---|---|---|---|---|---|---|---|---|---|---|---|---|---|----|---|---|---|---|---|---|---|---|---|---|
| Otu1495                                                                                                                                                                                                                                                                                                                                                                                                                                                                                                                                                                                                                                                                                                                                                                                                                              | 0 | 0 | 0 | 0 | 0 | 0 | 0 | 0 | 0 | 0 | 0 | 0 | 0 | 0 | 0 | 0 | 0  | 0 | 0 | 0 | 0 | 0 | 0 | 0 | 0 | 0 | 0 |
|                                                                                                                                                                                                                                                                                                                                                                                                                                                                                                                                                                                                                                                                                                                                                                                                                                      | 0 | 0 | 0 | 0 | 0 | 0 | 0 | 0 | 0 | 0 | 0 | 0 | 0 | 0 | 0 | 0 | 0  | 0 | 0 | 0 | 0 | 0 | 0 | 0 | 0 | 0 | 0 |
|                                                                                                                                                                                                                                                                                                                                                                                                                                                                                                                                                                                                                                                                                                                                                                                                                                      | 0 | 0 | 0 | 0 | 0 | 0 | 0 | 0 | 0 | 0 | 0 | 0 | 0 | 0 | 0 | 0 | 23 | 0 | 0 | 0 | 0 | 0 | 0 | 0 | 0 | 0 | 0 |
|                                                                                                                                                                                                                                                                                                                                                                                                                                                                                                                                                                                                                                                                                                                                                                                                                                      | 0 | 0 | 0 | 0 | 0 | 0 | 0 | 0 | 0 | 0 | 0 | 0 | 0 | 0 | 0 | 0 | 0  | 0 | 0 | 0 | 0 | 0 | 0 | 0 | 0 |   |   |
| M02255_77_000000000-ADUT3_1_1119_17992_13613 T---AC---GA-AG-GGG-----GCT-A-G-----C-G-T---T--GC-T-CGG-AA-----TT-A--C-T--GG-GC-----GT-A----AA-GG-GC-GC-----G-TA-G-G-C-G-----G--C-GC-C-A-G-----TA---G-T-C-A-----G-G-C--G--TG--A-AA-TT--C-C-TG-G-G----CT-C-AA-----C-C-T-G-G-G-G-G-C---T-G--C-G--C--T-----T--GA-T-A---C-----G--C-T--GG--T-G-C---T-A-G-A-G-G--A---C-GG----AA-G-A-----G-G-C-T---CG-C-----GG--A--ATT---C-C-C-A-GT--GT-A-G-AG-GT--G---A--A---TT-C-GT-AG--AT-A-TT--G-G--G-A-A-G-A-AC-A-CC---GG--T--G--GC-GAA-G--G-C--G-----G--C-G-A-G---CTG--G--TC-C-G-----T-T---A-C-T--GA--CG-C-T-G--A-GG--C-G-CG-A--CA-G-C---G-TG--GG-G--AG-C-A-AA-----CA--GG Bacteria(100);Proteobacteria(100);Alphaproteobacteria(100);Rhodospirillales(100);Acetobacteraceae(100);unclassified(100);unclassified(100);unclassified(100);unclassified(100); |   |   |   |   |   |   |   |   |   |   |   |   |   |   |   |   |    |   |   |   |   |   |   |   |   |   |   |
| Otu1496                                                                                                                                                                                                                                                                                                                                                                                                                                                                                                                                                                                                                                                                                                                                                                                                                              | 0 | 0 | 0 | 0 | 0 | 0 | 0 | 0 | 0 | 0 | 0 | 0 | 0 | 0 | 0 | 0 | 0  | 0 | 0 | 0 | 0 | 0 | 0 | 0 | 0 | 0 | 0 |
|                                                                                                                                                                                                                                                                                                                                                                                                                                                                                                                                                                                                                                                                                                                                                                                                                                      | 0 | 0 | 0 | 0 | 0 | 0 | 0 | 0 | 0 | 0 | 0 | 0 | 0 | 0 | 0 | 0 | 0  | 0 | 0 | 0 | 0 | 0 | 0 | 0 | 0 | 0 | 0 |
|                                                                                                                                                                                                                                                                                                                                                                                                                                                                                                                                                                                                                                                                                                                                                                                                                                      | 0 | 0 | 0 | 0 | 0 | 0 | 0 | 0 | 0 | 0 | 0 | 0 | 0 | 0 | 0 | 0 | 46 | 0 | 0 | 0 | 0 | 0 | 0 | 0 | 0 | 0 | 0 |
|                                                                                                                                                                                                                                                                                                                                                                                                                                                                                                                                                                                                                                                                                                                                                                                                                                      | 0 | 0 | 0 | 0 | 0 | 0 | 0 | 0 | 0 | 0 | 0 | 0 | 0 | 0 | 0 | 0 | 0  | 0 | 0 | 0 | 0 | 0 | 0 | 0 | 0 | 0 | 0 |
| M02255_77_000000000-ADUT3_1_1112_28147_8734 T---AC---GA-AG-GGG-----GCT-A-G-----C-G-T---T--GT-T-CGG-AT-----TT-A--C-T--GG-GC-----GT-A----AA-GC-GC-GC-----G-TA-G-G-C-G-----G--A-TT-G-T-T-----AA---G-T-C-A-----G-G-G--G--TG--A-AA-TC--C-C-AG-G-G----CT-C-AA-----C-C-C-T-G-G-A-A-C---T-G--C-C---T-T-----T--GA-T-A---C-----T--G-G--CA-A-T-C---T-G-G-A-G-A-T---C-GG----GA-G-A-----G-G-T-T---GG-T-----GG--A--ATT---C-C-G-A-GT--GT-A-G-AG-GT--G---A--A---TT-C-GT-AG--AT-A-TT--C-G--G-A-G-G-A-AC-A-CC---AG--A--A--GC-GAA-G--G-C--G-----G--C-C-A-A---CTG--G--CC-C-G-----A-T---A-C-T--GA--CG-C-T-G--A-GG--C-G-CG-A--AA-G-C---G-TG--GG-G--AG-C-A-AA-----CA--GG Bacteria(100);Proteobacteria(100);Alphaproteobacteria(100);unclassified(100);unclassified(100);unclassified(100);unclassified(100);unclassified(100);unclassified(100);            |   |   |   |   |   |   |   |   |   |   |   |   |   |   |   |   |    |   |   |   |   |   |   |   |   |   |   |
| Otu1497                                                                                                                                                                                                                                                                                                                                                                                                                                                                                                                                                                                                                                                                                                                                                                                                                              | 0 | 0 | 0 | 0 | 0 | 0 | 0 | 0 | 0 | 0 | 0 | 0 | 0 | 0 | 0 | 0 | 0  | 0 | 0 | 0 | 0 | 0 | 0 | 0 | 0 | 0 | 0 |
|                                                                                                                                                                                                                                                                                                                                                                                                                                                                                                                                                                                                                                                                                                                                                                                                                                      | 0 | 0 | 0 | 0 | 0 | 0 | 0 | 0 | 0 | 0 | 0 | 0 | 0 | 0 | 0 | 0 | 0  | 0 | 0 | 0 | 0 | 0 | 0 | 0 | 0 | 0 | 0 |
|                                                                                                                                                                                                                                                                                                                                                                                                                                                                                                                                                                                                                                                                                                                                                                                                                                      | 0 | 0 | 0 | 0 | 0 | 0 | 0 | 0 | 0 | 0 | 0 | 0 | 0 | 0 | 0 | 0 | 28 | 0 | 0 | 0 | 0 | 0 | 0 | 0 | 0 | 0 | 0 |
|                                                                                                                                                                                                                                                                                                                                                                                                                                                                                                                                                                                                                                                                                                                                                                                                                                      | 0 | 0 | 0 | 0 | 0 | 0 | 0 | 0 | 0 | 0 | 0 | 0 | 0 | 0 | 0 | 0 | 0  | 0 | 0 | 0 | 0 | 0 | 0 | 0 | 0 | 0 | 0 |
| M02255_77_000000000-ADUT3_1_1114_8522_19061 G---AC---GT-AG-GAG-----GCG-A-G-----C-G-T---T--AT-C-CGG-AT-----TC-A--C-T--GG-GC-----GT-A----AA-GC-GC-AT-----G-TA-G-G-C-G-----G--C-TG-T-G-C-----AA---G-T-C-G-----T-G-T--G--TT--A-AA-GC--C-C-CT-G-G----CT-C-AA-----C-T-G-G-G-G-G--A-G---G-T--C-A---T-G-----C--GA-G-A---C-----T--G-C--GC-G-G-C---T-G-G-A-G-G--G---C-AG----TA-G-A-----G-G-C-A---CA-T-----GG--A--ACT---C-C-C-G-GT--GT-A-G-CG-GT--G---G--A-A---TG-C-GT-AG--AG-A-TC--G-G--G-A-A-G-A-AC-A-CC---CG--T--G--GC-GAA-G--G-C--G-----G--T-G-T-G---CTG--G--GC-T-G-----C-A---C-C-T--GA--CG-C-T-G--A-GA--T-G-CG-A--AA-G-T---G-TG--GG-G--AG-C-A-AA-----CG--GG Bacteria(100);Chloroflexi(100);Caldilineae(100);Caldilineales(100);Caldilineaceae(100);uncultured(100);unclassified(100);unclassified(100);unclassified(100);                  |   |   |   |   |   |   |   |   |   |   |   |   |   |   |   |   |    |   |   |   |   |   |   |   |   |   |   |
| Otu1498                                                                                                                                                                                                                                                                                                                                                                                                                                                                                                                                                                                                                                                                                                                                                                                                                              | 0 | 0 | 0 | 0 | 0 | 0 | 0 | 0 | 0 | 0 | 0 | 0 | 0 | 0 | 0 | 0 | 0  | 0 | 0 | 0 | 0 | 0 | 0 | 0 | 0 | 0 | 0 |
|                                                                                                                                                                                                                                                                                                                                                                                                                                                                                                                                                                                                                                                                                                                                                                                                                                      | 0 | 0 | 0 | 0 | 0 | 0 | 0 | 0 | 0 | 0 | 0 | 0 | 0 | 0 | 0 | 0 | 0  | 0 | 0 | 0 | 0 | 0 | 0 | 0 | 0 | 0 | 0 |
|                                                                                                                                                                                                                                                                                                                                                                                                                                                                                                                                                                                                                                                                                                                                                                                                                                      | 0 | 0 | 0 | 0 | 0 | 0 | 0 | 0 | 0 | 0 | 0 | 0 | 0 | 0 | 0 | 0 | 16 | 0 | 0 | 0 | 0 | 0 | 0 | 0 | 0 | 0 | 0 |
|                                                                                                                                                                                                                                                                                                                                                                                                                                                                                                                                                                                                                                                                                                                                                                                                                                      | 0 | 0 | 0 | 0 | 0 | 0 | 0 | 0 | 0 | 0 | 0 | 0 | 0 | 0 | 0 | 0 | 0  | 0 | 0 | 0 | 0 | 0 | 0 | 0 | 0 | 0 | 0 |
| M02255_77_000000000-ADUT3_1_1114_25715_20690 T---AC---GT-AG-GCA-----GCA-A-G-----C-G-T---T--GT-T-CGG-AG-----TT-A--C-T--GG-GC-----GT-A----AA-GA-GT-GT-----G-TA-G-G-C-G-----G--T-TT-G-C-C-----AA---G-T-C-T-----A-G-T--G--TG--A-AA-TC--T-C-CC-G-G----CT-T-AA-----C-T-G-G-G-A-G--G-G---T-G--C-G---C-C-----G--GA-T-A---C-----T--G-G--CA-A-G-C---T-AG--A-G-T--G---C-GG----GA-G-A-----G-G-G-A---AG-C-----GG--A--ATT---C-C-T-G-GT--GT-A-G-CG-GT--G---A--A---TG-C-GT-AG--AT-A-TC--A-G--G-A-G-G-A-AC-A-CC---GG--T--G--GT-GTA-G--A-C--G-----G--C-T-T-C---CTG--G--AC-C-G-----C-C---A-C-T--GA--CG-C-T-G--A-GA--C-A-CG-A--AA-G-C---G-TG--GG-T--AG-C-A-AA-----CA--GG Bacteria(100);Acidobacteria(100);Acidobacteria(100);Acidobacteriales(100);Acidobacteriaceae(100);unclassified(100);unclassified(100);unclassified(100);unclassified(100);       |   |   |   |   |   |   |   |   |   |   |   |   |   |   |   |   |    |   |   |   |   |   |   |   |   |   |   |
| Otu1499                                                                                                                                                                                                                                                                                                                                                                                                                                                                                                                                                                                                                                                                                                                                                                                                                              | 0 | 0 | 0 | 0 | 0 | 0 | 0 | 0 | 0 | 0 | 0 | 0 | 0 | 0 | 0 | 0 | 0  | 0 | 0 | 0 | 0 | 0 | 0 | 0 | 0 | 0 | 0 |
|                                                                                                                                                                                                                                                                                                                                                                                                                                                                                                                                                                                                                                                                                                                                                                                                                                      | 0 | 0 | 0 | 0 | 0 | 0 | 0 | 0 | 0 | 0 | 0 | 0 | 0 | 0 | 0 | 0 | 0  | 0 | 0 | 0 | 0 | 0 | 0 | 0 | 0 | 0 | 0 |
|                                                                                                                                                                                                                                                                                                                                                                                                                                                                                                                                                                                                                                                                                                                                                                                                                                      | 0 | 0 | 0 | 0 | 0 | 0 | 0 | 0 | 0 | 0 | 0 | 0 | 0 | 0 | 0 | 0 | 16 | 0 | 0 | 0 | 0 | 0 | 0 | 0 | 0 | 0 | 0 |
|                                                                                                                                                                                                                                                                                                                                                                                                                                                                                                                                                                                                                                                                                                                                                                                                                                      | 0 | 0 | 0 | 0 | 0 | 0 | 0 | 0 | 0 | 0 | 0 | 0 | 0 | 0 | 0 | 0 | 0  | 0 | 0 | 0 | 0 | 0 | 0 | 0 | 0 | 0 | 0 |
| M02255_77_000000000-ADUT3_1_1114_12571_25138 T---AC---GA-AG-GGG-----GCT-A-G-----C-G-T---T--GT-T-CGG-AA-----TT-A--C-T--GG-GC-----GT-A----AA-GC-GC-AC-----G-TA-G-G-C-G-----G--A-CT-A-T-T-----AA---G-T-C-A-----G-G-G--G--TG--A-AA-TC--C-T-GG-A-G----CT-C-AA-----C-T-C-C-A-G-A--A-C---T-G--C-C---T-T-----T--GA-T-A---C-----T--G-A--TG-G-T-C---T-C-G-A-G-T--C---C-GG----AA-G-A-----G-G-T-G---AG-T-----GG--A--ATT---C-C-G-A-GT--GT-A-G-AG-GT--G---A--A---TT-C-GT-AG--AT-A-TT--C-G--G-A-G-G-A-AC-A-CC---AG--T--G--GC-GAA-G--G-C--G-----G--C-T-C-A---CTG--G--TC-C-G-----G-T---A-C-T--GA--CG-C-T-G--A-GG--T-G-CG-A--AA-G-C---G-TG--GG-G--AG-C-A-AA-----CA--GG Bacteria(100);Proteobacteria(100);Alphaproteobacteria(100);Rhizobiales(100);unclassified(100);unclassified(100);unclassified(100);unclassified(100);unclassified(100);          |   |   |   |   |   |   |   |   |   |   |   |   |   |   |   |   |    |   |   |   |   |   |   |   |   |   |   |



|                                                                                                                                                                                                                  |   |   |   |   |   |   |   |   |   |   |   |   |   |   |   |   |    |   |   |   |   |   |   |   |   |   |  |
|------------------------------------------------------------------------------------------------------------------------------------------------------------------------------------------------------------------|---|---|---|---|---|---|---|---|---|---|---|---|---|---|---|---|----|---|---|---|---|---|---|---|---|---|--|
| Otu1500                                                                                                                                                                                                          | 0 | 0 | 0 | 0 | 0 | 0 | 0 | 0 | 0 | 0 | 0 | 0 | 0 | 0 | 0 | 0 | 0  | 0 | 0 | 0 | 0 | 0 | 0 | 0 | 0 | 0 |  |
|                                                                                                                                                                                                                  | 0 | 0 | 0 | 0 | 0 | 0 | 0 | 0 | 0 | 0 | 0 | 0 | 0 | 0 | 0 | 0 | 0  | 0 | 0 | 0 | 0 | 0 | 0 | 0 | 0 | 0 |  |
|                                                                                                                                                                                                                  | 0 | 0 | 0 | 0 | 0 | 0 | 0 | 0 | 0 | 0 | 0 | 0 | 0 | 0 | 0 | 0 | 42 | 0 | 0 | 0 | 0 | 0 | 0 | 0 | 0 | 0 |  |
|                                                                                                                                                                                                                  | 0 | 0 | 0 | 0 | 0 | 0 | 0 | 0 | 0 | 0 | 0 | 0 | 0 | 0 | 0 | 0 | 0  | 0 | 0 | 0 | 0 | 0 | 0 | 0 | 0 | 0 |  |
| M02255_77_000000000-ADUT3_1_1115_13850_10052 T---AC--GA-AG-GGG-----GCG-A-G----C-G-T--T-GT-T-CGG-AA-----TT-A-C-T--GG-GC-----GT--A----AA-GG-GC-GC-----G-TA-G-G-C-G-----G-C-GT-A-C-C-----                           |   |   |   |   |   |   |   |   |   |   |   |   |   |   |   |   |    |   |   |   |   |   |   |   |   |   |  |
| -----AA---G-T-C-A-----G-G-C--G--TG--A-AA-GC--C-C-TG-G-G----CT-T-AA-----C-C-C-A-G-G-A-A-C---T-G--C-G--T-T-----T-GA-G-A--C-----T-G-G-TA-T-G-C---T-G-G-A-G-T-G--C-AG----GA-G-A-----G-G-T-C--GG-C-----GG-A-ATT-----  |   |   |   |   |   |   |   |   |   |   |   |   |   |   |   |   |    |   |   |   |   |   |   |   |   |   |  |
| C-C-C-A-GT--GT-A-G-AG-GT--G--A-A-A--TT-C-GT-AG--AG-A-TT--G-G--G-A-A-G-A-AC-A-CC--GG--T-G--GC-GTA-G--G-C-G-----G-C-C-G-A--CTG-G--AC-T-G-----T-A--A-C-T--GA--CG-C-T-G--A-GG--C-G-CG-A-AA-G-C--G-TG--               |   |   |   |   |   |   |   |   |   |   |   |   |   |   |   |   |    |   |   |   |   |   |   |   |   |   |  |
| GG-G--AG-C-A-AA-----CA--GG Bacteria(100);Proteobacteria(100);Alphaproteobacteria(100);unclassified(100);unclassified(100);unclassified(100);unclassified(100);unclassified(100);unclassified(100);               |   |   |   |   |   |   |   |   |   |   |   |   |   |   |   |   |    |   |   |   |   |   |   |   |   |   |  |
| Otu1501                                                                                                                                                                                                          | 0 | 0 | 0 | 0 | 0 | 0 | 0 | 0 | 0 | 0 | 0 | 0 | 0 | 0 | 0 | 0 | 0  | 0 | 0 | 0 | 0 | 0 | 0 | 0 | 0 | 0 |  |
|                                                                                                                                                                                                                  | 0 | 0 | 0 | 0 | 0 | 0 | 0 | 0 | 0 | 0 | 0 | 0 | 0 | 0 | 0 | 0 | 0  | 0 | 0 | 0 | 0 | 0 | 0 | 0 | 0 | 0 |  |
|                                                                                                                                                                                                                  | 0 | 0 | 0 | 0 | 0 | 0 | 0 | 0 | 0 | 0 | 0 | 0 | 0 | 0 | 0 | 0 | 19 | 0 | 0 | 0 | 0 | 0 | 0 | 0 | 0 | 0 |  |
|                                                                                                                                                                                                                  | 0 | 0 | 0 | 0 | 0 | 0 | 0 | 0 | 0 | 0 | 0 | 0 | 0 | 0 | 0 | 0 | 0  | 0 | 0 | 0 | 0 | 0 | 0 | 0 | 0 | 0 |  |
| M02255_77_000000000-ADUT3_1_1116_23223_21076 T---AC--GT-AG-GGG-----GCA-A-G----C-G-T--T-GT-C-CGG-AT-----TT-A--T-T--GG-GC-----GT--A----AA-GA-GC-TC-----G-TA-G-G-C-G-----G--T-TT-G-G-T-----                         |   |   |   |   |   |   |   |   |   |   |   |   |   |   |   |   |    |   |   |   |   |   |   |   |   |   |  |
| -----AA---G-T-C-G-----G-G-T-G--TG--A-AA-TC--T-C-CG-T-G----CT-C-AA-----C-A-C-G-G-A-G-G-----G-G-CC-A--C-C-----C-GA-T-A--C-----T-G-C--CA-TG-A-C---T-T-G-A-G-T-C--C-GG----TA-G-A-----G-G-A-G--AG-T-----GG-A-ATT----- |   |   |   |   |   |   |   |   |   |   |   |   |   |   |   |   |    |   |   |   |   |   |   |   |   |   |  |
| C-C-C-G-GT--GT-A-G-CG-GT--G--A-A-A--TG-C-GC-AG--AT-A-TC--G-G--G-A-G-G-A-AC-A-CC--AG--T-A--GC-GAA-G--G-C-G-----G-C-T-C-T--CTG-G--GC-C-G-----G-T--A-C-T--GA--CG-C-T-G--A-GG--A-G-CG-A-AA-G-C--G-TG--               |   |   |   |   |   |   |   |   |   |   |   |   |   |   |   |   |    |   |   |   |   |   |   |   |   |   |  |
| GG-G--AG-C-G-AA-----CA--GG Bacteria(100);unclassified(100);unclassified(100);unclassified(100);unclassified(100);unclassified(100);unclassified(100);unclassified(100);unclassified(100);                        |   |   |   |   |   |   |   |   |   |   |   |   |   |   |   |   |    |   |   |   |   |   |   |   |   |   |  |
| Otu1502                                                                                                                                                                                                          | 0 | 0 | 0 | 0 | 0 | 0 | 0 | 0 | 0 | 0 | 0 | 0 | 0 | 0 | 0 | 0 | 0  | 0 | 0 | 0 | 0 | 0 | 0 | 0 | 0 | 0 |  |
|                                                                                                                                                                                                                  | 0 | 0 | 0 | 0 | 0 | 0 | 0 | 0 | 0 | 0 | 0 | 0 | 0 | 0 | 0 | 0 | 0  | 0 | 0 | 0 | 0 | 0 | 0 | 0 | 0 | 0 |  |
|                                                                                                                                                                                                                  | 0 | 0 | 0 | 0 | 0 | 0 | 0 | 0 | 0 | 0 | 0 | 0 | 0 | 0 | 0 | 0 | 21 | 0 | 0 | 0 | 0 | 0 | 0 | 0 | 0 | 0 |  |
|                                                                                                                                                                                                                  | 0 | 0 | 0 | 0 | 0 | 0 | 0 | 0 | 0 | 0 | 0 | 0 | 0 | 0 | 0 | 0 | 0  | 0 | 0 | 0 | 0 | 0 | 0 | 0 | 0 | 0 |  |
| M02255_77_000000000-ADUT3_1_1117_14789_21871 T---AC--GT-AG-GGA-----GCG-A-G----C-G-T--T-GT-C-CGG-AT-----TT-A--T-T--GG-GC-----GT--A----AA-GA-GC-GC-----G-TA-G-G-C-G-----G--C-TT-G-A-T-----                         |   |   |   |   |   |   |   |   |   |   |   |   |   |   |   |   |    |   |   |   |   |   |   |   |   |   |  |
| -----AA---G-C-C-G-----G-A-T-G--TG--A-AA-CC--C-C-CA-A-G----CT-C-AA-----C-T-T-G-G-G-G-C---G-G-CC-A--T-T-----C--GG-A-A--C-----T-G-T--CA-TG-G-C---T-A-G-A-G-T-C--T-GG----TA-G-G-----G-G-A-A--CA-C-----GG-A-ATT-----  |   |   |   |   |   |   |   |   |   |   |   |   |   |   |   |   |    |   |   |   |   |   |   |   |   |   |  |
| C-C-T-G-GT--GT-A-G-CG-GT--G--A-A-A--TG-C-TT-AG--AT-A-TC--A-G--G-A-G-G-A-AC-A-CC--AG--T-G--GC-GAA-G--G-C-G-----G-T-G-T-T--CTG-G--GC-C-A-----G-T--A-C-T--GA--CG-C-T-G--A-GG--C-G-CG-A-AA-G-C--G-TG--               |   |   |   |   |   |   |   |   |   |   |   |   |   |   |   |   |    |   |   |   |   |   |   |   |   |   |  |
| GG-G--AG-C-G-AA-----CA--GG Bacteria(100);unclassified(100);unclassified(100);unclassified(100);unclassified(100);unclassified(100);unclassified(100);unclassified(100);unclassified(100);                        |   |   |   |   |   |   |   |   |   |   |   |   |   |   |   |   |    |   |   |   |   |   |   |   |   |   |  |
| Otu1503                                                                                                                                                                                                          | 0 | 0 | 0 | 0 | 0 | 0 | 0 | 0 | 0 | 0 | 0 | 0 | 0 | 0 | 0 | 0 | 0  | 0 | 0 | 0 | 0 | 0 | 0 | 0 | 0 | 0 |  |
|                                                                                                                                                                                                                  | 0 | 0 | 0 | 0 | 0 | 0 | 0 | 0 | 0 | 0 | 0 | 0 | 0 | 0 | 0 | 0 | 0  | 0 | 0 | 0 | 0 | 0 | 0 | 0 | 0 | 0 |  |
|                                                                                                                                                                                                                  | 0 | 0 | 0 | 0 | 0 | 0 | 0 | 0 | 0 | 0 | 0 | 0 | 0 | 0 | 0 | 0 | 29 | 0 | 0 | 0 | 0 | 0 | 0 | 0 | 0 | 0 |  |
|                                                                                                                                                                                                                  | 0 | 0 | 0 | 0 | 0 | 0 | 0 | 0 | 0 | 0 | 0 | 0 | 0 | 0 | 0 | 0 | 0  | 0 | 0 | 0 | 0 | 0 | 0 | 0 | 0 | 0 |  |
| M02255_77_000000000-ADUT3_1_1118_10343_19173 G---AC--GG-AG-GAG-----GCT-A-G----C-G-T--T-GT-T-CGG-AA-----TT-A-C-T--GG-GC-----GT--A----AA-GC-GC-GC-----G-CG-G-G-C-G-----G--T-CT-A-G-C-----                          |   |   |   |   |   |   |   |   |   |   |   |   |   |   |   |   |    |   |   |   |   |   |   |   |   |   |  |
|                                                                                                                                                                                                                  |   |   |   |   |   |   |   |   |   |   |   |   |   |   |   |   |    |   |   |   |   |   |   |   |   |   |  |



|                                                                                                                                                                                                                              |   |   |   |   |   |   |   |   |   |   |   |   |   |   |   |   |    |   |   |   |   |   |   |   |   |   |   |
|------------------------------------------------------------------------------------------------------------------------------------------------------------------------------------------------------------------------------|---|---|---|---|---|---|---|---|---|---|---|---|---|---|---|---|----|---|---|---|---|---|---|---|---|---|---|
| Otu1505                                                                                                                                                                                                                      | 0 | 0 | 0 | 0 | 0 | 0 | 0 | 0 | 0 | 0 | 0 | 0 | 0 | 0 | 0 | 0 | 0  | 0 | 0 | 0 | 0 | 0 | 0 | 0 | 0 | 0 | 0 |
|                                                                                                                                                                                                                              | 0 | 0 | 0 | 0 | 0 | 0 | 0 | 0 | 0 | 0 | 0 | 0 | 0 | 0 | 0 | 0 | 0  | 0 | 0 | 0 | 0 | 0 | 0 | 0 | 0 | 0 | 0 |
|                                                                                                                                                                                                                              | 0 | 0 | 0 | 0 | 0 | 0 | 0 | 0 | 0 | 0 | 0 | 0 | 0 | 0 | 0 | 0 | 22 | 0 | 0 | 0 | 0 | 0 | 0 | 0 | 0 | 0 | 0 |
|                                                                                                                                                                                                                              | 0 | 0 | 0 | 0 | 0 | 0 | 0 | 0 | 0 | 0 | 0 | 0 | 0 | 0 | 0 | 0 | 0  | 0 | 0 | 0 | 0 | 0 | 0 | 0 | 0 |   |   |
| M02255_77_000000000-ADUT3_1_1119_11468_17641 T---AC---GA-AG-GGG-----GCT-A-G-----C-G--T---T--GT-T-CGG-AA-----TT-A--C-T--GG-GC-----GT-A----AA-GC-GC-GC-----G-TA-G-G-T-T-----G--T-GT-G-G-C-----                                 |   |   |   |   |   |   |   |   |   |   |   |   |   |   |   |   |    |   |   |   |   |   |   |   |   |   |   |
| -----AA---G-T-C-A-----G-T-G--G--TG--A-AA-TC--C-C-GG-A-G-----CT-T-AA-----C-T-T-C-G-G-A--A-C---T-G--C-C---A--T-----T--GA-A-A--C-----T--G-C--TG--C-A-C---T-A-G-A-A-T--C---T-CA-----GA-G-G-----G-G-G-T--AG-C-----GG--A--ATT---C- |   |   |   |   |   |   |   |   |   |   |   |   |   |   |   |   |    |   |   |   |   |   |   |   |   |   |   |
| C-A-A-AT--GT-A-G-GG-GT--G---A--A-A---TC-C-GT-AG--AT-A-TT--T-G--G-A-G-G-A-AC-A-CC---GG--T--G--GC-GAA-G--G-C-G-----G--C-T-A-C---CTG--G--AT-G-A-----G-T---A-T-T--GA--CA-C-T-G--A-GG--C-G-CG-A--AA-G-C---G-TG--GG-               |   |   |   |   |   |   |   |   |   |   |   |   |   |   |   |   |    |   |   |   |   |   |   |   |   |   |   |
| G--AT-C-A-AA-----CA--GG Bacteria(100);Proteobacteria(100);Alphaproteobacteria(100);Rickettsiales(100);SM2D12(100);unclassified(100);unclassified(100);unclassified(100);unclassified(100);                                   |   |   |   |   |   |   |   |   |   |   |   |   |   |   |   |   |    |   |   |   |   |   |   |   |   |   |   |
| Otu1506                                                                                                                                                                                                                      | 0 | 0 | 0 | 0 | 0 | 0 | 0 | 0 | 0 | 0 | 0 | 0 | 0 | 0 | 0 | 0 | 0  | 0 | 0 | 0 | 0 | 0 | 0 | 0 | 0 | 0 | 0 |
|                                                                                                                                                                                                                              | 0 | 0 | 0 | 0 | 0 | 0 | 0 | 0 | 0 | 0 | 0 | 0 | 0 | 0 | 0 | 0 | 0  | 0 | 0 | 0 | 0 | 0 | 0 | 0 | 0 | 0 | 0 |
|                                                                                                                                                                                                                              | 0 | 0 | 0 | 0 | 0 | 0 | 0 | 0 | 0 | 0 | 0 | 0 | 0 | 0 | 0 | 0 | 27 | 0 | 0 | 0 | 0 | 0 | 0 | 0 | 0 | 0 | 0 |
|                                                                                                                                                                                                                              | 0 | 0 | 0 | 0 | 0 | 0 | 0 | 0 | 0 | 0 | 0 | 0 | 0 | 0 | 0 | 0 | 0  | 0 | 0 | 0 | 0 | 0 | 0 | 0 | 0 | 0 | 0 |
| M02255_77_000000000-ADUT3_1_2101_18236_11884 T---AC---GT-AG-GGG-----GCG-A-G-----C-G--T---T--GT-C-CGG-AT-----TT-A--T-T--GG-GC-----GT-A----AA-GA-GC-TC-----G-TA-G-G-C-G-----G--T-TT-G-G-C-----                                 |   |   |   |   |   |   |   |   |   |   |   |   |   |   |   |   |    |   |   |   |   |   |   |   |   |   |   |
| -----AA---G-T-C-G-----G-A-T-G--TG--A-AA-TC--T-C-CA-G-G-----CT-C-AA-----C-C-T-G-G-A-G--G-G---G-T--C-A--T--T-----C--GA-A-A--C-----T--G-C--CAT-G-A-C---T-A-G-A-G-T--T--C-GG-----TA-G-A-----G-G-A-G--TG-T-----GG--A--ATT---      |   |   |   |   |   |   |   |   |   |   |   |   |   |   |   |   |    |   |   |   |   |   |   |   |   |   |   |
| C-C-T-G-GT--GG-A-G-CG-GT--G---A--A-A---TG-C-GC-AG--AT-A-TC--A-G--G-A-G-G-A-AC-A-CC---CG--T--A--GC-GAA-G--G-C-G-----G--C-A-C-T---CTG--G--GC-C-G-----A-T---A-C-T--GA--CG-C-T-G--A-GG--A-G-CG-A--AA-G-C---G-TG--                |   |   |   |   |   |   |   |   |   |   |   |   |   |   |   |   |    |   |   |   |   |   |   |   |   |   |   |
| GG-G--AG-C-G-AA-----CA--GG Bacteria(100);Actinobacteria(100);Actinobacteria(100);Acidimicrobiae(100);Acidimicrobiales(100);Acidimicrobinae(100);unclassified(100);unclassified(100);unclassified(100);                       |   |   |   |   |   |   |   |   |   |   |   |   |   |   |   |   |    |   |   |   |   |   |   |   |   |   |   |
| Otu1507                                                                                                                                                                                                                      | 0 | 0 | 0 | 0 | 0 | 0 | 0 | 0 | 0 | 0 | 0 | 0 | 0 | 0 | 0 | 0 | 0  | 0 | 0 | 0 | 0 | 0 | 0 | 0 | 0 | 0 | 0 |
|                                                                                                                                                                                                                              | 0 | 0 | 0 | 0 | 0 | 0 | 0 | 0 | 0 | 0 | 0 | 0 | 0 | 0 | 0 | 0 | 0  | 0 | 0 | 0 | 0 | 0 | 0 | 0 | 0 | 0 | 0 |
|                                                                                                                                                                                                                              | 0 | 0 | 0 | 0 | 0 | 0 | 0 | 0 | 0 | 0 | 0 | 0 | 0 | 0 | 0 | 0 | 19 | 0 | 0 | 0 | 0 | 0 | 0 | 0 | 0 | 0 | 0 |
|                                                                                                                                                                                                                              | 0 | 0 | 0 | 0 | 0 | 0 | 0 | 0 | 0 | 0 | 0 | 0 | 0 | 0 | 0 | 0 | 0  | 0 | 0 | 0 | 0 | 0 | 0 | 0 | 0 |   |   |
| M02255_77_000000000-ADUT3_1_2103_28583_13361 T---AC---GT-AG-GTG-----GCA-A-G-----C-G--T---T--GT-C-CGG-AT-----TT-A--C-T--GG-GC-----GT-A----AA-GA-GC-GC-----G-CA-G-G-C-G-----G--C-CG-A-G-T-----                                 |   |   |   |   |   |   |   |   |   |   |   |   |   |   |   |   |    |   |   |   |   |   |   |   |   |   |   |
| -----AA---G-T-C-G-----A-A-T-G--TG--A-AA-GC--C-C-CCGG-----CT-C-AA-----C-T-G-G-G-G-A--A-C---G-T--C-A--T--T-----C--GA-T-A--C-----T--G---TTC-G-G-C---T-C-G-A-A-GA---T-AG---GA-G-A-----G-G-G-A--AG-C-----GG--A--ATT---            |   |   |   |   |   |   |   |   |   |   |   |   |   |   |   |   |    |   |   |   |   |   |   |   |   |   |   |
| T-C-A-G-GT--GT-A-G-TG-GT--G---A--A-A---TG-C-GT-AG--AT-A-TC--T-G--A-A-G-G-A-AC-A-CC---AG--T--G--GC-GAA-G--G-C-G-----G--C-T-T-T---CTG--G--CC-T-A-----T-T---C-T-T--GA--CG-C-T-G--A-GG--C-G-CG-A--AA-G-C---T-AG--GG-             |   |   |   |   |   |   |   |   |   |   |   |   |   |   |   |   |    |   |   |   |   |   |   |   |   |   |   |
| G--AG-C-G-AA-----CG--GG Bacteria(100);unclassified(100);unclassified(100);unclassified(100);unclassified(100);unclassified(100);unclassified(100);unclassified(100);unclassified(100);                                       |   |   |   |   |   |   |   |   |   |   |   |   |   |   |   |   |    |   |   |   |   |   |   |   |   |   |   |
| Otu1508                                                                                                                                                                                                                      | 0 | 0 | 0 | 0 | 0 | 0 | 0 | 0 | 0 | 0 | 0 | 0 | 0 | 0 | 0 | 0 | 0  | 0 | 0 | 0 | 0 | 0 | 0 | 0 | 0 | 0 | 0 |
|                                                                                                                                                                                                                              | 0 | 0 | 0 | 0 | 0 | 0 | 0 | 0 | 0 | 0 | 0 | 0 | 0 | 0 | 0 | 0 | 0  | 0 | 0 | 0 | 0 | 0 | 0 | 0 | 0 | 0 | 0 |
|                                                                                                                                                                                                                              | 0 | 0 | 0 | 0 | 0 | 0 | 0 | 0 | 0 | 0 | 0 | 0 | 0 | 0 | 0 | 0 | 23 | 0 | 0 | 0 | 0 | 0 | 0 | 0 | 0 | 0 | 0 |
|                                                                                                                                                                                                                              | 0 | 0 | 0 | 0 | 0 | 0 | 0 | 0 | 0 | 0 | 0 | 0 | 0 | 0 | 0 | 0 | 0  | 0 | 0 | 0 | 0 | 0 | 0 | 0 | 0 | 0 | 0 |
| M02255_77_000000000-ADUT3_1_2107_9236_17761 T---AC---GG-AG-GGA-----GCT-A-G-----C-G--T---T--AT-T-CGG-AA-----TT-A--C-T--GG-GC-----GT-A----AA-GC-GC-GC-----G-TA-G-G-C-G-----G--T-TT-T-T-T-----AA--                              |   |   |   |   |   |   |   |   |   |   |   |   |   |   |   |   |    |   |   |   |   |   |   |   |   |   |   |
| --G-T-C-A-----G-A-G--G--TG--A-AA-GC--C-T-GG-A-G-----CT-C-AA-----C-T-C-C-A-G-A--A-C---T-G--C-C---T--T-----T--GA-A-A--C-----T--G-G--AA--G-A-C---T-T-G-A-A-T--C---T-TG---GA-G-A-----G-G-T-C--AG-T-----GG--A--ATT---C-C-G-A-     |   |   |   |   |   |   |   |   |   |   |   |   |   |   |   |   |    |   |   |   |   |   |   |   |   |   |   |
| GT--GT-A-G-AG-GT--G---A--A-A---TT-C-GT-AG--AT-A-TT--C-G--G-A-A-G-A-AC-A-CC---AG--T--G--GC-GAA-G--G-C-G-----A--C-T-G-A---CTG--G--AC-A-A-----G-T---A-T-T--GA--CG-C-T-G--A-GG--T-G-CG-A--AA-G-C---G-TG--GG-G--AG-               |   |   |   |   |   |   |   |   |   |   |   |   |   |   |   |   |    |   |   |   |   |   |   |   |   |   |   |
| C-A-AA-----CA--GG Bacteria(100);Proteobacteria(100);Alphaproteobacteria(100);Sphingomonadales(100);unclassified(100);unclassified(100);unclassified(100);unclassified(100);unclassified(100);                                |   |   |   |   |   |   |   |   |   |   |   |   |   |   |   |   |    |   |   |   |   |   |   |   |   |   |   |
| Otu1509                                                                                                                                                                                                                      | 0 | 0 | 0 | 0 | 0 | 0 | 0 | 0 | 0 | 0 | 0 | 0 | 0 | 0 | 0 | 0 | 0  | 0 | 0 | 0 | 0 | 0 | 0 | 0 | 0 | 0 | 0 |
|                                                                                                                                                                                                                              | 0 | 0 | 0 | 0 | 0 | 0 | 0 | 0 | 0 | 0 | 0 | 0 | 0 | 0 | 0 | 0 | 0  | 0 | 0 | 0 | 0 | 0 | 0 | 0 | 0 | 0 | 0 |
|                                                                                                                                                                                                                              | 0 | 0 | 0 | 0 | 0 | 0 | 0 | 0 | 0 | 0 | 0 | 0 | 0 | 0 | 0 | 0 | 15 | 0 | 0 | 0 | 0 | 0 | 0 | 0 | 0 | 0 | 0 |
|                                                                                                                                                                                                                              | 0 | 0 | 0 | 0 | 0 | 0 | 0 | 0 | 0 | 0 | 0 | 0 | 0 | 0 | 0 | 0 | 0  | 0 | 0 | 0 | 0 | 0 | 0 | 0 | 0 |   |   |
| M02255_77_000000000-ADUT3_1_2116_12337_19537 T---AC---GA-AG-GGG-----GCT-A-G-----C-G--T---T--GT-T-CGG-AT-----TT-A--C-T--GG-GC-----GT-A----AA-GC-GC-GC-----G-TA-G-G-C-G-----G--A-TA-T-T-T-----                                 |   |   |   |   |   |   |   |   |   |   |   |   |   |   |   |   |    |   |   |   |   |   |   |   |   |   |   |
| -----AA---G-T-C-G-----G-G-G--G--TG--A-AA-TC--C-C-GG-G-G-----CT-C-AA-----C-C-C-C-G-G-A--A-T---G-G--C-C---T--T-----C--GA-T-A--C-----T--G-G--AT--G-T-C---T-G-G-A-G-A--T--C-GG---GA-G-A-----G-G-T-T---GG-T-----GG--A--ATT---     |   |   |   |   |   |   |   |   |   |   |   |   |   |   |   |   |    |   |   |   |   |   |   |   |   |   |   |
| C-C-G-A-GT--GT-A-G-AG-GT--G---A--A-A---TT-C-GT-AG--AT-A-TT--C-G--G-A-G-G-A-AC-A-CC---AG--A--A--GC-GAA-G--G-C-G-----G--C-C-A-A---CTG--G--CC-C-G-----A-T---A-C-T--GA--CG-C-T-G--A-GG--C-G-CG-A--AA-G-C---G-TG--                |   |   |   |   |   |   |   |   |   |   |   |   |   |   |   |   |    |   |   |   |   |   |   |   |   |   |   |
| GG-G--AG-C-A-AA-----CA--GG Bacteria(100);Proteobacteria(100);Alphaproteobacteria(100);unclassified(100);unclassified(100);unclassified(100);unclassified(100);unclassified(100);unclassified(100);                           |   |   |   |   |   |   |   |   |   |   |   |   |   |   |   |   |    |   |   |   |   |   |   |   |   |   |   |



Otu1510 0 0 0 0 0 0 0 0 0 0 0 0 0 0 0 0 0 0 0 0 0 0 0 0 0 0 0 0  
0 0 0 0 0 0 0 0 0 0 0 0 0 0 0 0 0 0 0 0 0 0 0 0 0 0 0 0  
0 0 0 0 0 0 0 0 0 0 0 0 0 0 0 0 20 0 0 0 0 0 0 0 0 0 0 0  
0 0 0 0 0 0 0 0 0 0 0 0 0 0 0 0 0 0 0 0 0 0 0 0 0 0  
M02255\_77\_000000000-ADUT3\_1\_2117\_22755\_8453 T---AC---GG-AA-GAT-----CCA-A-G-----C-G--T--T--AT-C-CGG-AA-----TT-A--C-T--GG-GC-----GT--A----AA-GA-GTTGC-----G-TA-G-G-T-G-----G--C-AT-A-G-C-----  
AA---G-T-A-G-----G-T-A-G--TG--A-AA-GC--G-T-TC-G-G-----CT-C-AA-----C-C-G-G-A-T-A--T-C---C-A--T-T--A-C-----C-TA-A-A--C-----T-G-T--TA--A-G-C---T-A-G-A-G-G-A--T-GA----GA-G-A-----G-G-T-T--AT-T-----GG--A--ATT---C-C-C-  
T-GT--GT-A-G-GA-GT--G---A--A-A---TC-C-GT-AG--AT-A-TA--G-G--G-A-G-G-A-AC-A-CC--GA--T--G--GC-GTA-G--G-C--A-----G--A-T-A-A---CTG--G--CT-C-A-----T-T---C-C-T--GA--CA-C-T-A--A-GG--C-A-CG-A--AA-G-C---G-TG--GG-G--AG-  
C-A-AA-----CG--GG Bacteria(100);Candidate\_division\_TM7(100);unclassified(100);unclassified(100);unclassified(100);unclassified(100);unclassified(100);unclassified(100);

Otu1511 0 0 0 0 0 0 0 0 0 0 0 0 0 0 0 0 0 0 0 0 0 0 0 0 0 0 0 0  
0 0 0 0 0 0 0 0 0 0 0 0 0 0 0 0 0 0 0 0 0 0 0 0 0 0 0 0  
0 0 0 0 0 0 0 0 0 0 0 0 0 0 0 0 24 0 0 0 0 0 0 0 0 0 0 0  
0 0 0 0 0 0 0 0 0 0 0 0 0 0 0 0 0 0 0 0 0 0 0 0 0 0  
M02255\_77\_000000000-ADUT3\_1\_2118\_28353\_17498 T---AC---GA-AG-GGG-----GCT-A-G-----C-G--T--T--GT-T-CGG-AA-----TT-A--C-T--GG-GC-----GT--A----AA-GC-GT-AC-----G-TA-G-G-C-G-----G--A-TT-T-G-T-----  
-----AA---G-T-A-G-----G-G-G--G--TG--A-AA-TC--C-C-CA-G-G-----CT-C-AA-----C-C-T-G-G-G-A-A-C---T-G--C-C---T-T-----C-TA-G-A--C-----T-G-C-AA-G-T-C---T-T-G-A-G-A--T---C-AG----GA-G-A-----G-G-C-G--AG-T-----GG--A--ATT---  
C-C-G-A-GT--GT-A-G-AG-GT--G---A--A-A---TT-C-GT-AG--AT-A-TT--C-G--G-A-G-G-A-AC-A-CC--AG--T--G--GC-GAA-G--G-C--G-----A--C-T-C-G--CTG--G--AC-T-G-----A-T---A-C-T--GA--CG-C-T-G--A-GG--T-A-CG-A--AA-G-C---G-TG--GG-  
G--AG-C-A-AA-----CA--GG Bacteria(100);Proteobacteria(100);Alphaproteobacteria(100);unclassified(100);unclassified(100);unclassified(100);unclassified(100);unclassified(100);unclassified(100);

Otu1512 0 0 0 0 0 0 0 0 0 0 0 0 0 0 0 0 0 0 0 0 0 0 0 0 0 0 0 0  
0 0 0 0 0 0 0 0 0 0 0 0 0 0 0 0 0 0 0 0 0 0 0 0 0 0 0 0  
0 0 0 0 0 0 0 0 0 0 0 0 0 0 0 0 26 0 0 0 0 0 0 0 0 0 0 0  
0 0 0 0 0 0 0 0 0 0 0 0 0 0 0 0 0 0 0 0 0 0 0 0 0 0  
M02255\_77\_000000000-ADUT3\_1\_1106\_12928\_14988 T---AC---GG-AG-GGG-----GCT-A-G-----C-G--T--T--GT-T-CGG-AA-----TT-A--C-T--GG-GC-----GT--A----AA-GC-GC-AC-----G-TA-G-G-C-G-----G--A-CC-T-A-C-----  
-----AA---G-T-C-G-----G-G-G--G--TG--A-AA-TC--C-C-GG-G-G-----CT-C-AA-----C-C-C-C-G-G-A-A-C---T-G--C-C---T-T-----C-GA-A-A--C-----T-G-T--CG--G-T-C---T-G-G-A-G-T--C---C-GA----GA-G-A-----G-G-T-G--AG-T-----GG--A--ATT---  
C-C-G-A-GT--GT-A-G-AG-GT--G---A--A-A---TT-C-GT-AG--AT-A-TT--C-G--G-A-G-G-A-AC-A-CC--AG--T--G--GC-GAA-G--G-C--G-----G--C-T-C-A---CTG--G--CT-C-G-----G-T---A-C-T--GA--CG-C-T-G--A-GG--T-G-CG-A--AA-G-C---G-TG--GG-  
G--AG-C-A-AA-----CA--GG Bacteria(100);Proteobacteria(100);Alphaproteobacteria(100);unclassified(100);unclassified(100);unclassified(100);unclassified(100);unclassified(100);unclassified(100);

Otu1513 0 0 0 0 0 0 0 0 0 0 0 0 0 0 0 0 0 0 0 0 0 0 0 0 0 0 0 0  
0 0 0 0 0 0 0 0 0 0 0 0 0 0 0 0 0 0 0 0 0 0 0 0 0 0 0 0  
0 0 0 0 0 0 0 0 0 0 0 0 0 0 0 0 16 0 0 0 0 0 0 0 0 0 0 0  
0 0 0 0 0 0 0 0 0 0 0 0 0 0 0 0 0 0 0 0 0 0 0 0 0 0  
M02255\_76\_000000000-ADUNE\_1\_1115\_13378\_8762 .....AC---T-AC-GT-----GCC-A-G-----C--A--G---C--CG-C-GGT-AA-----TA-C--G-T--AG-GT-----GG--C---AA-GC---G-----T-TA-T-C-C-G-----G--A-TT-T-T-T-----AA---G-  
T-C-T-----G-A-T--G--TG--A-AA-GC--C-T-TC-G-G-----CT-T-AA-----C-C-G-A-A-G-A--A-G---T-G--C-A---T-C-----G--GA-A-A--C-----T--G-G--GA--A-A-C---T-T-G-A-G-T--G---C-AG----AA-G-A-----G-G-A-C---AG-T-----GG--A--ACT---C-C-A-T-GT--  
GT-A-G-CG-GT--G---A--A-A---TG-C-GT-AG--AT-A-TA--T-G--G-A-A-G-A-AC-A-CC--AG--T--G--GC-GAA-G--G-C--G-----G--C-T-G-T---CTG--G--TC-T-G-----T-A---A-C-T--GA--CG-C-T-G--A-GG--C-T-CG-A--AA-G-C---A-TG--GG-T--AG-C-G-  
AA-----CA--GG Bacteria(100);Firmicutes(100);Bacilli(100);Lactobacillales(100);Lactobacillaceae(100);unclassified(100);unclassified(100);unclassified(100);unclassified(100);

Otu1514 0 0 0 0 0 0 0 0 0 0 0 0 0 0 0 0 0 0 0 0 0 0 0 0 0 0 0 0  
0 0 0 0 0 0 0 0 0 0 0 0 0 0 0 0 0 0 0 0 0 0 0 0 0 0 0 0  
0 0 0 0 0 0 0 0 0 0 0 0 0 0 0 0 19 0 0 0 0 0 0 0 0 0 0 0  
0 0 0 0 0 0 0 0 0 0 0 0 0 0 0 0 0 0 0 0 0 0 0 0 0 0  
M02255\_76\_000000000-ADUNE\_1\_2111\_22102\_10996 T---AC---GA-AG-GGG-----GCT-A-G-----C-G--T--T--GC-T-CGG-AA-----TC-A--C-T--GG-GC-----GT--A----AA-GC-GC-AC-----G-TA-G-G---G-----T--C-AT---T-T-----  
-----A---G-T-C-A-----G-G-G--G--TG--A-AA-TC--C-T-GG-A-G-----CT-C-AA-----C-T-C-C-A-G-A-A-C---T-G--C-C---T-T-----T--GA-T-A--C-----T--G-A-TG--A-T-C---T-TGG-A-G-T--C---C-GG----GA-G-A-----G-G-T-G--GG-T-----GG--A--ACT---G-  
C-G-A-GT--GT-A-G-AG-GT--G---A--A-A---TT-C-GT-AG--AT-A-TT--C-G--C-A-A-G-A-AC-A-CC--AG--T--G--GC-GAA-G--G-C--G-----G--C-T-C-A---CTG--G--CC-C-G-----G-T---A-C-T--GA--CA-C-T-G--A-GG--T-G-CG-A--AA-G-C---G-TG--GG-G-  
-AG-C-A-AA-----CA--GG Bacteria(100);Proteobacteria(100);Alphaproteobacteria(100);Rhizobiales(100);unclassified(100);unclassified(100);unclassified(100);unclassified(100);unclassified(100);



|                                                                                                                                                                                                                                                                                                                                                                                                                                                                                                                                                                                                                                                                                                                                                                                                                                                   |   |   |   |   |   |   |   |   |   |   |   |   |   |   |   |   |    |   |   |   |   |   |   |   |   |   |   |
|---------------------------------------------------------------------------------------------------------------------------------------------------------------------------------------------------------------------------------------------------------------------------------------------------------------------------------------------------------------------------------------------------------------------------------------------------------------------------------------------------------------------------------------------------------------------------------------------------------------------------------------------------------------------------------------------------------------------------------------------------------------------------------------------------------------------------------------------------|---|---|---|---|---|---|---|---|---|---|---|---|---|---|---|---|----|---|---|---|---|---|---|---|---|---|---|
| Otu1515                                                                                                                                                                                                                                                                                                                                                                                                                                                                                                                                                                                                                                                                                                                                                                                                                                           | 0 | 0 | 0 | 0 | 0 | 0 | 0 | 0 | 0 | 0 | 0 | 0 | 0 | 0 | 0 | 0 | 0  | 0 | 0 | 0 | 0 | 0 | 0 | 0 | 0 | 0 | 0 |
|                                                                                                                                                                                                                                                                                                                                                                                                                                                                                                                                                                                                                                                                                                                                                                                                                                                   | 0 | 0 | 0 | 0 | 0 | 0 | 0 | 0 | 0 | 0 | 0 | 0 | 0 | 0 | 0 | 0 | 0  | 0 | 0 | 0 | 0 | 0 | 0 | 0 | 0 | 0 | 0 |
|                                                                                                                                                                                                                                                                                                                                                                                                                                                                                                                                                                                                                                                                                                                                                                                                                                                   | 0 | 0 | 0 | 0 | 0 | 0 | 0 | 0 | 0 | 0 | 0 | 0 | 0 | 0 | 0 | 0 | 48 | 0 | 0 | 0 | 0 | 0 | 0 | 0 | 0 | 0 | 0 |
|                                                                                                                                                                                                                                                                                                                                                                                                                                                                                                                                                                                                                                                                                                                                                                                                                                                   | 0 | 0 | 0 | 0 | 0 | 0 | 0 | 0 | 0 | 0 | 0 | 0 | 0 | 0 | 0 | 0 | 0  | 0 | 0 | 0 | 0 | 0 | 0 | 0 | 0 |   |   |
| M02255_77_000000000-ADUT3_1_1101_24143_8271 T---AC---GA-AG-GGG-----GCT-A-G-----C--G--T---T--GT-T-CGG-AA-----TT-A--C-T--GG-GC-----GT--A----AA-GG-GC-GC-----G-TA-G-G-C-G-----G--T-CT-T-G-T-----AA-<br>---G-T-C-A-----G-A-T--G--TG--A-AA-GC--C-C-CG-G-G----CT-C-AA-----C-C-C-G-G-G-A--A-T---A-G--C-A---T--T-----T--GA-T-A---C-----T--G-C--GA--G-G-C---T-T-G-A-G-T--C---C-GG----GA-G-A-----G-G-A-T--GG-C-----GG--A--ATT---C-C-C-A-<br>GT--GT-A-G-AG-GT--G---A--A-A---TT-C-GT-AG--AT-A-TT--G-G--G-A-A-G-A-AC-A-CC---GG--T--G--GC-GAA-G--G-C-G-----G--C-C-A-T---CTG--G--AC-C-G-----G-T---A-C-T--GA--CG-C-T-G--A-GG--C-G-CG-A--AA-G-C---GTGG--GG---AG-<br>C-A-AA-----CA--GG Bacteria(100);Proteobacteria(100);Alphaproteobacteria(100);Rhodospirillales(100);MND8(100);unclassified(100);unclassified(100);unclassified(100);unclassified(100);          |   |   |   |   |   |   |   |   |   |   |   |   |   |   |   |   |    |   |   |   |   |   |   |   |   |   |   |
| Otu1516                                                                                                                                                                                                                                                                                                                                                                                                                                                                                                                                                                                                                                                                                                                                                                                                                                           | 0 | 0 | 0 | 0 | 0 | 0 | 0 | 0 | 0 | 0 | 0 | 0 | 0 | 0 | 0 | 0 | 0  | 0 | 0 | 0 | 0 | 0 | 0 | 0 | 0 | 0 | 0 |
|                                                                                                                                                                                                                                                                                                                                                                                                                                                                                                                                                                                                                                                                                                                                                                                                                                                   | 0 | 0 | 0 | 0 | 0 | 0 | 0 | 0 | 0 | 0 | 0 | 0 | 0 | 0 | 0 | 0 | 0  | 0 | 0 | 0 | 0 | 0 | 0 | 0 | 0 | 0 | 0 |
|                                                                                                                                                                                                                                                                                                                                                                                                                                                                                                                                                                                                                                                                                                                                                                                                                                                   | 0 | 0 | 0 | 0 | 0 | 0 | 0 | 0 | 0 | 0 | 0 | 0 | 0 | 0 | 0 | 0 | 37 | 0 | 0 | 0 | 0 | 0 | 0 | 0 | 0 | 0 | 0 |
|                                                                                                                                                                                                                                                                                                                                                                                                                                                                                                                                                                                                                                                                                                                                                                                                                                                   | 0 | 0 | 0 | 0 | 0 | 0 | 0 | 0 | 0 | 0 | 0 | 0 | 0 | 0 | 0 | 0 | 0  | 0 | 0 | 0 | 0 | 0 | 0 | 0 | 0 | 0 | 0 |
| M02255_77_000000000-ADUT3_1_1103_3393_8760 T---AC---GA-AG-GGG-----GCG-A-G-----C--G--T---T--GT-T-CGG-AT-----TT-A--C-T--GG-GC-----GT--A----AA-GG-GC-GC-----G-CA-G-G-C-G-----G--C-TT-A-T-T-----TT-<br>---G-T-C-A-----G-G-C-G--TG--A-AA-GC--C-C-CG-G-G----CT-T-AA-----C-C-T-G-G-G-A--A-C---T-G--C-G---C--T-----T--GA-G-A---C-----G--G-A-TG--G-G-C---T-A-G-A-G-T--T---C-GG----GA-G-A-----G-G-A-G---AG-T-----GG--A--ATT---C-C-C-A-<br>GT--GT-A-G-AG-GT--G---A--A-A---TT-C-GT-AG--AT-A-TT--G-G--G-A-A-G-A-AC-A-CC---GG--T--G--GC-GAA-G--G-C-G-----G--C-T-C-T---CTG--G--AC-C-G-----A-G---A-C-T--GA--CG-C-T-G--A-GG--C-G-CG-A--AA-G-C---G-TG--GG-G--AG-<br>C-A-AA-----CA--GG Bacteria(100);Proteobacteria(100);Alphaproteobacteria(100);Rhodospirillales(100);unclassified(100);unclassified(100);unclassified(100);unclassified(100);unclassified(100);   |   |   |   |   |   |   |   |   |   |   |   |   |   |   |   |   |    |   |   |   |   |   |   |   |   |   |   |
| Otu1517                                                                                                                                                                                                                                                                                                                                                                                                                                                                                                                                                                                                                                                                                                                                                                                                                                           | 0 | 0 | 0 | 0 | 0 | 0 | 0 | 0 | 0 | 0 | 0 | 0 | 0 | 0 | 0 | 0 | 0  | 0 | 0 | 0 | 0 | 0 | 0 | 0 | 0 | 0 | 0 |
|                                                                                                                                                                                                                                                                                                                                                                                                                                                                                                                                                                                                                                                                                                                                                                                                                                                   | 0 | 0 | 0 | 0 | 0 | 0 | 0 | 0 | 0 | 0 | 0 | 0 | 0 | 0 | 0 | 0 | 0  | 0 | 0 | 0 | 0 | 0 | 0 | 0 | 0 | 0 | 0 |
|                                                                                                                                                                                                                                                                                                                                                                                                                                                                                                                                                                                                                                                                                                                                                                                                                                                   | 0 | 0 | 0 | 0 | 0 | 0 | 0 | 0 | 0 | 0 | 0 | 0 | 0 | 0 | 0 | 0 | 76 | 0 | 0 | 0 | 0 | 0 | 0 | 0 | 0 | 0 | 0 |
|                                                                                                                                                                                                                                                                                                                                                                                                                                                                                                                                                                                                                                                                                                                                                                                                                                                   | 0 | 0 | 0 | 0 | 0 | 0 | 0 | 0 | 0 | 0 | 0 | 0 | 0 | 0 | 0 | 0 | 0  | 0 | 0 | 0 | 0 | 0 | 0 | 0 | 0 | 0 | 0 |
| M02255_77_000000000-ADUT3_1_1104_13675_10283 T---AC---GG-AG-GGG-----GCT-A-G-----C--G--T---T--GT-T-CGG-AA-----TT-A--C-T--GG-GC-----GT--A----AA-GC-GC-AC-----G-TA-G-G-C-G-----G--G-CT-G-G-A---<br>-----AA---G-T-T-G-----G-G-G-G--TG--A-AA-TC--C-C-GG-G-G----CT-C-AA-----C-C-C-C-G-G-A--A-C---T-G--C-C---C--T-----C--AA-A-A---C-----T--T-T--CA--G-T-C---T-G-G-A-G-T--C---C-GA---GA-G-A-----G-G-T-G---AG-T-----GG--A--ATT---<br>C-C-G-A-GT--GT-A-G-AG-GT--G---A--A-A---TT-C-GT-AG--AT-A-TT--C-G--G-A-G-G-A-AC-A-CC---AG--T--G--GC-GAA-G--G-C-G-----G--C-T-C-A---CTG--G--CT-C-G-----G-T---A-C-T--GA--CG-C-T-G--A-GG--T-G-CG-A--AA-G-C---G-TG--GG-<br>G--AG-C-A-AA-----CA--GG Bacteria(100);Proteobacteria(100);Alphaproteobacteria(100);unclassified(100);unclassified(100);unclassified(100);unclassified(100);unclassified(100);unclassified(100);   |   |   |   |   |   |   |   |   |   |   |   |   |   |   |   |   |    |   |   |   |   |   |   |   |   |   |   |
| Otu1518                                                                                                                                                                                                                                                                                                                                                                                                                                                                                                                                                                                                                                                                                                                                                                                                                                           | 0 | 0 | 0 | 0 | 0 | 0 | 0 | 0 | 0 | 0 | 0 | 0 | 0 | 0 | 0 | 0 | 0  | 0 | 0 | 0 | 0 | 0 | 0 | 0 | 0 | 0 | 0 |
|                                                                                                                                                                                                                                                                                                                                                                                                                                                                                                                                                                                                                                                                                                                                                                                                                                                   | 0 | 0 | 0 | 0 | 0 | 0 | 0 | 0 | 0 | 0 | 0 | 0 | 0 | 0 | 0 | 0 | 0  | 0 | 0 | 0 | 0 | 0 | 0 | 0 | 0 | 0 | 0 |
|                                                                                                                                                                                                                                                                                                                                                                                                                                                                                                                                                                                                                                                                                                                                                                                                                                                   | 0 | 0 | 0 | 0 | 0 | 0 | 0 | 0 | 0 | 0 | 0 | 0 | 0 | 0 | 0 | 0 | 16 | 0 | 0 | 0 | 0 | 0 | 0 | 0 | 0 | 0 | 0 |
|                                                                                                                                                                                                                                                                                                                                                                                                                                                                                                                                                                                                                                                                                                                                                                                                                                                   | 0 | 0 | 0 | 0 | 0 | 0 | 0 | 0 | 0 | 0 | 0 | 0 | 0 | 0 | 0 | 0 | 0  | 0 | 0 | 0 | 0 | 0 | 0 | 0 | 0 | 0 | 0 |
| M02255_77_000000000-ADUT3_1_1105_16387_20366 T---AC---GA-AG-GGT-----GCT-A-G-----C--G--T---T--GT-T-CGG-AA-----TC-A--C-T--GG-GC-----GT--A----AA-GC-GC-AC-----G-TA-G-G-C-G-----GT-C-CG-C-A-C---<br>-----CA---G-T-C-A-----G-G-C-G--TG--A-AA-GC--C-C-CG-G-G----CT-C-AA-----C-C-C-G-G-G-A--A-T---A-G--C-G---C--T-----T--GA-T-A---C-----T--A-G--CG--G-G-C---T-A-G-A-G-T--C---C-GG----GA-G-A-----G-G-A-T---AG-T-----GG--A--ATT---<br>C-C-C-A-GT--GT-A-G-AG-GT--G---A--A-A---TT-C-GT-AG--AT-A-TT--G-G--G-A-A-G-A-AC-A-CC---AG--T--G--GC-GAA-G--G-C-G-----G--C-T-A-T---CTG--G--AC-C-G-----G-T---A-C-T--GA--CG-C-T-G--A-GG--T-G-CG-A--AA-G-C---GTGG--<br>GG---AG-C-A-AA-----CA--GG Bacteria(100);Proteobacteria(100);Alphaproteobacteria(100);unclassified(100);unclassified(100);unclassified(100);unclassified(100);unclassified(100);unclassified(100);   |   |   |   |   |   |   |   |   |   |   |   |   |   |   |   |   |    |   |   |   |   |   |   |   |   |   |   |
| Otu1519                                                                                                                                                                                                                                                                                                                                                                                                                                                                                                                                                                                                                                                                                                                                                                                                                                           | 0 | 0 | 0 | 0 | 0 | 0 | 0 | 0 | 0 | 0 | 0 | 0 | 0 | 0 | 0 | 0 | 0  | 0 | 0 | 0 | 0 | 0 | 0 | 0 | 0 | 0 | 0 |
|                                                                                                                                                                                                                                                                                                                                                                                                                                                                                                                                                                                                                                                                                                                                                                                                                                                   | 0 | 0 | 0 | 0 | 0 | 0 | 0 | 0 | 0 | 0 | 0 | 0 | 0 | 0 | 0 | 0 | 0  | 0 | 0 | 0 | 0 | 0 | 0 | 0 | 0 | 0 | 0 |
|                                                                                                                                                                                                                                                                                                                                                                                                                                                                                                                                                                                                                                                                                                                                                                                                                                                   | 0 | 0 | 0 | 0 | 0 | 0 | 0 | 0 | 0 | 0 | 0 | 0 | 0 | 0 | 0 | 0 | 23 | 0 | 0 | 0 | 0 | 0 | 0 | 0 | 0 | 0 | 0 |
|                                                                                                                                                                                                                                                                                                                                                                                                                                                                                                                                                                                                                                                                                                                                                                                                                                                   | 0 | 0 | 0 | 0 | 0 | 0 | 0 | 0 | 0 | 0 | 0 | 0 | 0 | 0 | 0 | 0 | 0  | 0 | 0 | 0 | 0 | 0 | 0 | 0 | 0 | 0 | 0 |
| M02255_77_000000000-ADUT3_1_1105_19008_23029 T---AC---GA-AG-GGG-----GCT-A-G-----C--G--T---T--GT-T-CGG-AT-----TT-A--C-T--GG-GC-----GT--A----AA-GC-GC-GT-----G-TA-G-G-C-G-----G--A-CT-T-G-T-----<br>-----AA---G-T-T-G-----G-G-G-G--TG--A-AA-TC--C-C-GA-G-G----CT-C-AA-----C-C-T-C-G-G-A--A-C---T-G--C-C---T--C-----C--AA-A-A---C-----T--A-C--AA--G-T-C---T-G-G-A-C-T--C---A-AG---TA-G-A-----G-G-C-A---AG-T-----GG--A--ATT---G-<br>C-G-A-GT--GT-A-G-AG-GT--G---A--A-A---TT-C-GT-AG--AT-A-TT--C-G--C-A-G-G-A-AC-A-CC---AG--T--G--GC-GAA-G--G-C-G-----A--C-T-T-G---CTG--G--AC-T-T-----G-T---A-G-T--GA--CG-C-T-G--A-GA--C-G-CG-A--AA-G-C---G-TG--GG-G-<br>-AG-C-A-AA-----CA--GG Bacteria(100);Proteobacteria(100);Alphaproteobacteria(100);unclassified(100);unclassified(100);unclassified(100);unclassified(100);unclassified(100);unclassified(100); |   |   |   |   |   |   |   |   |   |   |   |   |   |   |   |   |    |   |   |   |   |   |   |   |   |   |   |



|                                                                                                                                                                                                                 |   |   |   |   |   |   |   |   |   |   |   |   |   |   |   |   |    |   |   |   |   |   |   |   |   |   |  |
|-----------------------------------------------------------------------------------------------------------------------------------------------------------------------------------------------------------------|---|---|---|---|---|---|---|---|---|---|---|---|---|---|---|---|----|---|---|---|---|---|---|---|---|---|--|
| Otu1520                                                                                                                                                                                                         | 0 | 0 | 0 | 0 | 0 | 0 | 0 | 0 | 0 | 0 | 0 | 0 | 0 | 0 | 0 | 0 | 0  | 0 | 0 | 0 | 0 | 0 | 0 | 0 | 0 | 0 |  |
|                                                                                                                                                                                                                 | 0 | 0 | 0 | 0 | 0 | 0 | 0 | 0 | 0 | 0 | 0 | 0 | 0 | 0 | 0 | 0 | 0  | 0 | 0 | 0 | 0 | 0 | 0 | 0 | 0 | 0 |  |
|                                                                                                                                                                                                                 | 0 | 0 | 0 | 0 | 0 | 0 | 0 | 0 | 0 | 0 | 0 | 0 | 0 | 0 | 0 | 0 | 31 | 0 | 0 | 0 | 0 | 0 | 0 | 0 | 0 | 0 |  |
|                                                                                                                                                                                                                 | 0 | 0 | 0 | 0 | 0 | 0 | 0 | 0 | 0 | 0 | 0 | 0 | 0 | 0 | 0 | 0 | 0  | 0 | 0 | 0 | 0 | 0 | 0 | 0 | 0 | 0 |  |
| M02255_77_000000000-ADUT3_1_1106_16204_8221 T---AC--GG-AG-GAG-----GCA-A-G----C-G-T---T--GT-T-CGG-AA-----TC-A-C-T--GG-GC-----TT-A----AA-GC-GC-GT-----G-TA-G-G-C-G-----G-G-AA-G-G-C-----                          |   |   |   |   |   |   |   |   |   |   |   |   |   |   |   |   |    |   |   |   |   |   |   |   |   |   |  |
| GG---G-T-G-T-----C-C-T--G--TG--A-AA-GC--C-C-TC-G-G----CT-C-AA-----C-C-G-G-G-G-A-A-T---T-G-C-A--G-A-----G-CA-A-A--C-----T-A-C-CT-T-T-C---T-T-G-A-G-G-C--A-GG---TA-G-A-----G-G-C-A--AG-T-----GG--A--ACT---A-T-G-  |   |   |   |   |   |   |   |   |   |   |   |   |   |   |   |   |    |   |   |   |   |   |   |   |   |   |  |
| G-GT--GG-A-G-CG-GT--G---A-A-A--TG-C-GT-AG--AT-A-TC--C-A-T-G-G-G-A-AC-G-CC--GG--T-G--GC-GAA-A-G-C-G-----G-C-T-T-G--CTG--G--GC-C-T-----G-T--C-C-T-GA--CG-C-T-G-A-GA--C-G-CG-A-AA-G-C--G-TA--GG-G--                |   |   |   |   |   |   |   |   |   |   |   |   |   |   |   |   |    |   |   |   |   |   |   |   |   |   |  |
| AG-C-A-AA-----CA--GG Bacteria(100);unclassified(100);unclassified(100);unclassified(100);unclassified(100);unclassified(100);unclassified(100);unclassified(100);unclassified(100);                             |   |   |   |   |   |   |   |   |   |   |   |   |   |   |   |   |    |   |   |   |   |   |   |   |   |   |  |
| Otu1521                                                                                                                                                                                                         | 0 | 0 | 0 | 0 | 0 | 0 | 0 | 0 | 0 | 0 | 0 | 0 | 0 | 0 | 0 | 0 | 0  | 0 | 0 | 0 | 0 | 0 | 0 | 0 | 0 | 0 |  |
|                                                                                                                                                                                                                 | 0 | 0 | 0 | 0 | 0 | 0 | 0 | 0 | 0 | 0 | 0 | 0 | 0 | 0 | 0 | 0 | 0  | 0 | 0 | 0 | 0 | 0 | 0 | 0 | 0 | 0 |  |
|                                                                                                                                                                                                                 | 0 | 0 | 0 | 0 | 0 | 0 | 0 | 0 | 0 | 0 | 0 | 0 | 0 | 0 | 0 | 0 | 15 | 0 | 0 | 0 | 0 | 0 | 0 | 0 | 0 | 0 |  |
|                                                                                                                                                                                                                 | 0 | 0 | 0 | 0 | 0 | 0 | 0 | 0 | 0 | 0 | 0 | 0 | 0 | 0 | 0 | 0 | 0  | 0 | 0 | 0 | 0 | 0 | 0 | 0 | 0 | 0 |  |
| M02255_76_000000000-ADUNE_1_1105_12990_4908 T---AC--GA-AG-GGG-----GCT-A-G----C-G-T---T--GT-T-CGG-AT-----TT-A-C-T--GG-GC-----GT-A----AA-GC-GC-GC-----G-CA-----G-----G--C-CT-T-G-C-----AA---                      |   |   |   |   |   |   |   |   |   |   |   |   |   |   |   |   |    |   |   |   |   |   |   |   |   |   |  |
| G-T-C-G-----A-G-G--G--TG--A-AA-TC--C-C-AG-A-G----CT-C-AA-----C-T-C-T-G-G-A-A-T---T-G-C-C--T-T-----C-GA-G-A--C-----T-G-C-TT-G-G-C---T-TCG-A-G-T-A--C-GG---GA-G-A-----G-G-T-G--AG-T-----GG--A--ATT---C-C-C-A-GT-  |   |   |   |   |   |   |   |   |   |   |   |   |   |   |   |   |    |   |   |   |   |   |   |   |   |   |  |
| -GT-A-G-AG-GT--G---A-A-A--TT-C-GT-AG--AT-A-TT-G-G--G-A-A-G-A-AC-A-CC--GG--T-G--GC-GAA-G-G-C-G-----G-C-T-C-A--CTG--G--CC-C-G-----T-T--A-C-T-GA--CG-C-T-C-A-GG--C-G-CG-A-CA-G-C--G-TG--GG-G--AT-C-A-              |   |   |   |   |   |   |   |   |   |   |   |   |   |   |   |   |    |   |   |   |   |   |   |   |   |   |  |
| AA-----CA--GG Bacteria(100);Proteobacteria(100);Alphaproteobacteria(100);unclassified(100);unclassified(100);unclassified(100);unclassified(100);unclassified(100);unclassified(100);                           |   |   |   |   |   |   |   |   |   |   |   |   |   |   |   |   |    |   |   |   |   |   |   |   |   |   |  |
| Otu1522                                                                                                                                                                                                         | 0 | 0 | 0 | 0 | 0 | 0 | 0 | 0 | 0 | 0 | 0 | 0 | 0 | 0 | 0 | 0 | 0  | 0 | 0 | 0 | 0 | 0 | 0 | 0 | 0 | 0 |  |
|                                                                                                                                                                                                                 | 0 | 0 | 0 | 0 | 0 | 0 | 0 | 0 | 0 | 0 | 0 | 0 | 0 | 0 | 0 | 0 | 0  | 0 | 0 | 0 | 0 | 0 | 0 | 0 | 0 | 0 |  |
|                                                                                                                                                                                                                 | 0 | 0 | 0 | 0 | 0 | 0 | 0 | 0 | 0 | 0 | 0 | 0 | 0 | 0 | 0 | 0 | 23 | 0 | 0 | 0 | 0 | 0 | 0 | 0 | 0 | 0 |  |
|                                                                                                                                                                                                                 | 0 | 0 | 0 | 0 | 0 | 0 | 0 | 0 | 0 | 0 | 0 | 0 | 0 | 0 | 0 | 0 | 0  | 0 | 0 | 0 | 0 | 0 | 0 | 0 | 0 | 0 |  |
| M02255_77_000000000-ADUT3_1_1107_26838_11597 T---AC--GA-AA-GGG-----GCT-A-G----C-G-T---T--GT-T-CGG-AA-----TT-A-C-T--GG-GC-----GT-A----AA-GC-GC-AC-----G-TA-G-G-C-G-----G--C-AT-T-G-T-----                        |   |   |   |   |   |   |   |   |   |   |   |   |   |   |   |   |    |   |   |   |   |   |   |   |   |   |  |
| -----AA---G-T-T-A-----G-G-G--G--TG--A-AA-TC--C-C-CG-G-G----CT-C-AA-----C-C-C-G-G-G-A-A-C---T-G--C-C--T-T-----T-AA-G-A--C-----T-G-C-AA-A-G-C---T-T-G-A-G-G-A--T-GC---GA-G-A-----G-G-T-T--GG-C-----GG--A--ATT---C |   |   |   |   |   |   |   |   |   |   |   |   |   |   |   |   |    |   |   |   |   |   |   |   |   |   |  |
| C-C-G-A-GT--GT-A-G-AG-GT--G---A-A-A--TT-C-GT-AG--AT-A-TT-C-G--G-A-A-G-A-AC-A-CC--AG--T-G--GC-GAA-G-G-C-G-----G-C-C-A-A--CTG--G--CG-C-A-----T-T--T-C-T-GA--CG-C-T-G-A-GG--T-G-CG-A-AA-G-C--G-TG--GG-             |   |   |   |   |   |   |   |   |   |   |   |   |   |   |   |   |    |   |   |   |   |   |   |   |   |   |  |
| G--AG-C-A-AA-----CA--GG Bacteria(100);Proteobacteria(100);Alphaproteobacteria(100);Parvularculales(100);Parvularculaceae(100);Parvularcula(100);unclassified(100);unclassified(100);unclassified(100);          |   |   |   |   |   |   |   |   |   |   |   |   |   |   |   |   |    |   |   |   |   |   |   |   |   |   |  |
| Otu1523                                                                                                                                                                                                         | 0 | 0 | 0 | 0 | 0 | 0 | 0 | 0 | 0 | 0 | 0 | 0 | 0 | 0 | 0 | 0 | 0  | 0 | 0 | 0 | 0 | 0 | 0 | 0 | 0 | 0 |  |
|                                                                                                                                                                                                                 | 0 | 0 | 0 | 0 | 0 | 0 | 0 | 0 | 0 | 0 | 0 | 0 | 0 | 0 | 0 | 0 | 0  | 0 | 0 | 0 | 0 | 0 | 0 | 0 | 0 | 0 |  |
|                                                                                                                                                                                                                 | 0 | 0 | 0 | 0 | 0 | 0 | 0 | 0 | 0 | 0 | 0 | 0 | 0 | 0 | 0 | 0 | 26 | 0 | 0 | 0 | 0 | 0 | 0 | 0 | 0 | 0 |  |
|                                                                                                                                                                                                                 | 0 | 0 | 0 | 0 | 0 | 0 | 0 | 0 | 0 | 0 | 0 | 0 | 0 | 0 | 0 | 0 | 0  | 0 | 0 | 0 | 0 | 0 | 0 | 0 | 0 | 0 |  |
| M02255_77_000000000-ADUT3_1_1107_17079_17986 T---AC--GA-AG-GGG-----GCT-A-G----C-G-T---T--GT-T-CGG-AT-----TT-A-C-T--GG-GC-----GT-A----AA-GC-GC-AC-----G-TA-G-G-C-G-----G--G-TC-G-T-T-----                        |   |   |   |   |   |   |   |   |   |   |   |   |   |   |   |   |    |   |   |   |   |   |   |   |   |   |  |
| -----AA                                                                                                                                                                                                         |   |   |   |   |   |   |   |   |   |   |   |   |   |   |   |   |    |   |   |   |   |   |   |   |   |   |  |



|                                                                                                                                                                                                                                                                                                                                                                                                                                                                                                                                                                                                                                                                                                                                                                                                                        |   |   |   |   |   |   |   |   |   |   |   |   |   |   |   |   |    |   |   |   |   |   |   |   |   |   |   |
|------------------------------------------------------------------------------------------------------------------------------------------------------------------------------------------------------------------------------------------------------------------------------------------------------------------------------------------------------------------------------------------------------------------------------------------------------------------------------------------------------------------------------------------------------------------------------------------------------------------------------------------------------------------------------------------------------------------------------------------------------------------------------------------------------------------------|---|---|---|---|---|---|---|---|---|---|---|---|---|---|---|---|----|---|---|---|---|---|---|---|---|---|---|
| Otu1525                                                                                                                                                                                                                                                                                                                                                                                                                                                                                                                                                                                                                                                                                                                                                                                                                | 0 | 0 | 0 | 0 | 0 | 0 | 0 | 0 | 0 | 0 | 0 | 0 | 0 | 0 | 0 | 0 | 0  | 0 | 0 | 0 | 0 | 0 | 0 | 0 | 0 | 0 | 0 |
|                                                                                                                                                                                                                                                                                                                                                                                                                                                                                                                                                                                                                                                                                                                                                                                                                        | 0 | 0 | 0 | 0 | 0 | 0 | 0 | 0 | 0 | 0 | 0 | 0 | 0 | 0 | 0 | 0 | 0  | 0 | 0 | 0 | 0 | 0 | 0 | 0 | 0 | 0 | 0 |
|                                                                                                                                                                                                                                                                                                                                                                                                                                                                                                                                                                                                                                                                                                                                                                                                                        | 0 | 0 | 0 | 0 | 0 | 0 | 0 | 0 | 0 | 0 | 0 | 0 | 0 | 0 | 0 | 0 | 46 | 0 | 0 | 0 | 0 | 0 | 0 | 0 | 0 | 0 | 0 |
|                                                                                                                                                                                                                                                                                                                                                                                                                                                                                                                                                                                                                                                                                                                                                                                                                        | 0 | 0 | 0 | 0 | 0 | 0 | 0 | 0 | 0 | 0 | 0 | 0 | 0 | 0 | 0 | 0 | 0  | 0 | 0 | 0 | 0 | 0 | 0 | 0 | 0 | 0 | 0 |
| M02255_77_000000000-ADUT3_1_1108_6366_8067 T---AC---GA-AG-GGG-----ACT-A-G-----C-G-T---T-GT-T-CGG-AA-----TT-A-C-T-GG-GC-----GT-A-----AA-GC-GC-GC-----G-TA-G-G-C-G-----G-A-TC-G-C-T-----AA-<br>---G-T-C-A-----G-G-G-G-TG--A-AA-TC--C-C-AA-G-G----CT-C-AA-----C-C-T-T-G-G-A-A-C---T-G-C-C---T-T-----T-GA-T-A--C-----T-G-A-CG-A-T-C---T-G-G-A-G-A-T--T-GG----GA-G-A-----G-G-T-G--AG-T-----GG-A-ATT---C-C-G-A-<br>GT--GT-A-G-AG-GT--G---A-A-A---TT-C-GT-AG--AT-A-TT--C-G-G-A-G-G-A-AC-A-CC--AG--A-A--GC-GAA-G-G-C-G-----G-C-T-C-A--CTG-G-CC-C-A-----A-T---A-C-T-GA--CG-C-T-G--A-GG-C-G-CG-A-AA-G-C---G-TG--GG-G--AG-<br>C-A-AA-----CA--GG Bacteria(100);Proteobacteria(100);Alphaproteobacteria(100);unclassified(100);unclassified(100);unclassified(100);unclassified(100);unclassified(100);unclassified(100);           |   |   |   |   |   |   |   |   |   |   |   |   |   |   |   |   |    |   |   |   |   |   |   |   |   |   |   |
| Otu1526                                                                                                                                                                                                                                                                                                                                                                                                                                                                                                                                                                                                                                                                                                                                                                                                                | 0 | 0 | 0 | 0 | 0 | 0 | 0 | 0 | 0 | 0 | 0 | 0 | 0 | 0 | 0 | 0 | 0  | 0 | 0 | 0 | 0 | 0 | 0 | 0 | 0 | 0 | 0 |
|                                                                                                                                                                                                                                                                                                                                                                                                                                                                                                                                                                                                                                                                                                                                                                                                                        | 0 | 0 | 0 | 0 | 0 | 0 | 0 | 0 | 0 | 0 | 0 | 0 | 0 | 0 | 0 | 0 | 0  | 0 | 0 | 0 | 0 | 0 | 0 | 0 | 0 | 0 | 0 |
|                                                                                                                                                                                                                                                                                                                                                                                                                                                                                                                                                                                                                                                                                                                                                                                                                        | 0 | 0 | 0 | 0 | 0 | 0 | 0 | 0 | 0 | 0 | 0 | 0 | 0 | 0 | 0 | 0 | 64 | 0 | 0 | 0 | 0 | 0 | 0 | 0 | 0 | 0 | 0 |
|                                                                                                                                                                                                                                                                                                                                                                                                                                                                                                                                                                                                                                                                                                                                                                                                                        | 0 | 0 | 0 | 0 | 0 | 0 | 0 | 0 | 0 | 0 | 0 | 0 | 0 | 0 | 0 | 0 | 0  | 0 | 0 | 0 | 0 | 0 | 0 | 0 | 0 | 0 | 0 |
| M02255_77_000000000-ADUT3_1_1109_17464_15658 T---AC---GA-AG-GGG-----GCT-A-G-----C-G-T---T-GC-T-CGG-AT-----TT-A-C-T-GG-GC-----GT-A-----AA-GG-GC-GC-----G-TA-G-G-C-G-----G-A-TG-A-C-C---<br>-----AA---G-T-T-G-----G-G-G--G-TG--A-AA-GC--C-C-GG-G-G----CT-C-AA-----C-C-T-C-G-G-A-A-T---T-G-C-C---T-T-----C-AA-A-A--C-----T-G-G--TT-G-T-C---T-T-G-A-G-T-A--T-GG----GA-G-A-----G-G-T-G--TG-T-----GG-A-ACT---<br>C-C-G-A-GT--GT-A-G-AG-GT--G---A-A-A---TT-C-GT-AG--AT-A-TT--C-G-G-A-A-G-A-AC-A-CC--AG--T-G--GC-GAA-G-G-C-G-----A-C-A-C-A--CTG-G-CC-C-A-----T-T---A-C-T-GA--CG-C-T-G--A-GG--C-G-CG-A-AA-G-C---G-TG--GG-<br>G--AG-C-A-AA-----CA--GG Bacteria(100);Proteobacteria(100);Alphaproteobacteria(100);Caulobacterales(100);unclassified(100);unclassified(100);unclassified(100);unclassified(100);unclassified(100); |   |   |   |   |   |   |   |   |   |   |   |   |   |   |   |   |    |   |   |   |   |   |   |   |   |   |   |
| Otu1527                                                                                                                                                                                                                                                                                                                                                                                                                                                                                                                                                                                                                                                                                                                                                                                                                | 0 | 0 | 0 | 0 | 0 | 0 | 0 | 0 | 0 | 0 | 0 | 0 | 0 | 0 | 0 | 0 | 0  | 0 | 0 | 0 | 0 | 0 | 0 | 0 | 0 | 0 | 0 |
|                                                                                                                                                                                                                                                                                                                                                                                                                                                                                                                                                                                                                                                                                                                                                                                                                        | 0 | 0 | 0 | 0 | 0 | 0 | 0 | 0 | 0 | 0 | 0 | 0 | 0 | 0 | 0 | 0 | 0  | 0 | 0 | 0 | 0 | 0 | 0 | 0 | 0 | 0 | 0 |
|                                                                                                                                                                                                                                                                                                                                                                                                                                                                                                                                                                                                                                                                                                                                                                                                                        | 0 | 0 | 0 | 0 | 0 | 0 | 0 | 0 | 0 | 0 | 0 | 0 | 0 | 0 | 0 | 0 | 15 | 0 | 0 | 0 | 0 | 0 | 0 | 0 | 0 | 0 | 0 |
|                                                                                                                                                                                                                                                                                                                                                                                                                                                                                                                                                                                                                                                                                                                                                                                                                        | 0 | 0 | 0 | 0 | 0 | 0 | 0 | 0 | 0 | 0 | 0 | 0 | 0 | 0 | 0 | 0 | 0  | 0 | 0 | 0 | 0 | 0 | 0 | 0 | 0 | 0 | 0 |
| M02255_77_000000000-ADUT3_1_1110_14149_16330 T---AC---GA-AG-GGG-----GCT-A-G-----C-G-T---T-GC-T-CGG-AA-----TC-A-C-T-GG-GC-----GT-A-----AA-GG-GC-GC-----G-TA-G-G-C-G-----G-A-TA-C-T-T---<br>-----AA---G-T-C-A-----G-G-G--G-TG--A-AA-GC--C-C-GA-G-G----CT-C-AA-----C-C-T-C-G-G-A-A-C---T-G-C-C---T-T-----T-GA-T-A--C-----T-G-A-GT--A-T-C---T-T-G-A-G-A-C--C-GG----TA-G-A-----G-G-T-A--AG-T-----GG-A-ACT---<br>G-C-G-A-GT--GT-A-G-AG-GT--G---A-A-A---TT-C-GT-AG--AT-A-TT--C-G--C-A-A-G-A-AC-A-CC--AG--T-G--GC-GAA-G-G-C-G-----G-C-T-T-A--CTG-G-AC-C-G-----G-T---T-C-T-GA--CG-C-T-G--A-GG--C-G-CG-A-AA-G-C---G-TG--GG-<br>G--AG-C-A-AA-----CA--GG Bacteria(100);Proteobacteria(100);Alphaproteobacteria(100);Rhizobiales(100);unclassified(100);unclassified(100);unclassified(100);unclassified(100);unclassified(100);    |   |   |   |   |   |   |   |   |   |   |   |   |   |   |   |   |    |   |   |   |   |   |   |   |   |   |   |
| Otu1528                                                                                                                                                                                                                                                                                                                                                                                                                                                                                                                                                                                                                                                                                                                                                                                                                | 0 | 0 | 0 | 0 | 0 | 0 | 0 | 0 | 0 | 0 | 0 | 0 | 0 | 0 | 0 | 0 | 0  | 0 | 0 | 0 | 0 | 0 | 0 | 0 | 0 | 0 | 0 |
|                                                                                                                                                                                                                                                                                                                                                                                                                                                                                                                                                                                                                                                                                                                                                                                                                        | 0 | 0 | 0 | 0 | 0 | 0 | 0 | 0 | 0 | 0 | 0 | 0 | 0 | 0 | 0 | 0 | 0  | 0 | 0 | 0 | 0 | 0 | 0 | 0 | 0 | 0 | 0 |
|                                                                                                                                                                                                                                                                                                                                                                                                                                                                                                                                                                                                                                                                                                                                                                                                                        | 0 | 0 | 0 | 0 | 0 | 0 | 0 | 0 | 0 | 0 | 0 | 0 | 0 | 0 | 0 | 0 | 15 | 0 | 0 | 0 | 0 | 0 | 0 | 0 | 0 | 0 | 0 |
|                                                                                                                                                                                                                                                                                                                                                                                                                                                                                                                                                                                                                                                                                                                                                                                                                        | 0 | 0 | 0 | 0 | 0 | 0 | 0 | 0 | 0 | 0 | 0 | 0 | 0 | 0 | 0 | 0 | 0  | 0 | 0 | 0 | 0 | 0 | 0 | 0 | 0 | 0 | 0 |
| M02255_77_000000000-ADUT3_1_1111_22645_11961 T---AC---GT-AG-GGG-----TCT-A-G-----C-G-T---T-GT-T-CGG-AA-----TC-A-T-T-GG-GC-----GT-A-----AA-GA-GC-TC-----G-TA-G-G-C-G-----G-T-TC-G-G-C---<br>-----AA---G                                                                                                                                                                                                                                                                                                                                                                                                                                                                                                                                                                                                                  |   |   |   |   |   |   |   |   |   |   |   |   |   |   |   |   |    |   |   |   |   |   |   |   |   |   |   |



|                                                                                                                                                                                                                                                                                                                                                                                                                                                                                                                                                                                                                                                                                                                                                                                                                      |   |   |   |   |   |   |   |   |   |   |   |   |   |   |   |   |   |     |   |   |   |   |   |    |   |   |   |
|----------------------------------------------------------------------------------------------------------------------------------------------------------------------------------------------------------------------------------------------------------------------------------------------------------------------------------------------------------------------------------------------------------------------------------------------------------------------------------------------------------------------------------------------------------------------------------------------------------------------------------------------------------------------------------------------------------------------------------------------------------------------------------------------------------------------|---|---|---|---|---|---|---|---|---|---|---|---|---|---|---|---|---|-----|---|---|---|---|---|----|---|---|---|
| Otu1530                                                                                                                                                                                                                                                                                                                                                                                                                                                                                                                                                                                                                                                                                                                                                                                                              | 0 | 0 | 0 | 0 | 0 | 0 | 0 | 0 | 0 | 0 | 0 | 0 | 0 | 0 | 0 | 0 | 0 | 0   | 0 | 0 | 0 | 0 | 0 | 0  | 0 | 0 | 0 |
|                                                                                                                                                                                                                                                                                                                                                                                                                                                                                                                                                                                                                                                                                                                                                                                                                      | 0 | 0 | 0 | 0 | 0 | 0 | 0 | 0 | 0 | 0 | 0 | 0 | 0 | 0 | 0 | 0 | 0 | 0   | 0 | 0 | 0 | 0 | 0 | 0  | 0 | 0 | 0 |
|                                                                                                                                                                                                                                                                                                                                                                                                                                                                                                                                                                                                                                                                                                                                                                                                                      | 0 | 0 | 0 | 0 | 0 | 0 | 0 | 0 | 0 | 0 | 0 | 0 | 0 | 0 | 0 | 0 | 0 | 46  | 0 | 0 | 0 | 0 | 0 | 0  | 0 | 0 | 0 |
|                                                                                                                                                                                                                                                                                                                                                                                                                                                                                                                                                                                                                                                                                                                                                                                                                      | 0 | 0 | 0 | 0 | 0 | 0 | 0 | 0 | 0 | 0 | 0 | 0 | 0 | 0 | 0 | 0 | 0 | 0   | 0 | 0 | 0 | 0 | 0 | 0  | 0 | 0 | 0 |
| M02255_77_000000000-ADUT3_1_1104_10969_9432 T---AC---GT-AG-GGA-----GCA-A-G-----C-G-T---T-AT-C-CGG-AT-----TT-A-T-T-GG-GT-----GT-A----AA-GG-GT-GC-----G-TA-G-A-C-G-----G-G-AA-A-T-T-----AA-<br>---G-T-T-A-----G-T-T-G-TG--A-AA-TC--C-C-TC-G-G----CT-T-AA-----C-T-G-A-G-G-A-A-C---T-G-C-A--A-C-----T-AA-A-A--C-----T-G-G--TT--T-T-C---T-T-G-A-G-T-G---C-GG---GA-G-A-----G-G-A-A--AG-T-----GG--A--ATT---C-C-T-A-<br>GT--GT-A-G-CG-GT--G---A-A-A---TG-C-GT-AG--AT-A-TT--A-G--G-A-G-G-A-AC-A-CC--AG--T--G--GC-GAA-G-G-C--G-----A-C-T-T-T---CTG--G-AC-C-G-----T-A--A-C-T--GA--CG-T-T-G--A-GG--C-A-CG-A--AA-G-T---G-TG--GG-G--AG-C-<br>A-AA-----CA--GG Bacteria(100);Firmicutes(100);Clostridia(100);Clostridiales(100);Ruminococcaceae(100);uncultured(100);unclassified(100);unclassified(100);unclassified(100);          |   |   |   |   |   |   |   |   |   |   |   |   |   |   |   |   |   |     |   |   |   |   |   |    |   |   |   |
| Otu1531                                                                                                                                                                                                                                                                                                                                                                                                                                                                                                                                                                                                                                                                                                                                                                                                              | 0 | 0 | 0 | 0 | 0 | 0 | 0 | 0 | 0 | 0 | 0 | 0 | 0 | 0 | 0 | 0 | 0 | 0   | 0 | 0 | 0 | 0 | 0 | 0  | 0 | 0 | 0 |
|                                                                                                                                                                                                                                                                                                                                                                                                                                                                                                                                                                                                                                                                                                                                                                                                                      | 0 | 0 | 0 | 0 | 0 | 0 | 0 | 0 | 0 | 0 | 0 | 0 | 0 | 0 | 0 | 0 | 0 | 0   | 0 | 0 | 0 | 0 | 0 | 0  | 0 | 0 | 0 |
|                                                                                                                                                                                                                                                                                                                                                                                                                                                                                                                                                                                                                                                                                                                                                                                                                      | 0 | 0 | 0 | 0 | 0 | 0 | 0 | 0 | 0 | 0 | 0 | 0 | 0 | 0 | 0 | 0 | 0 | 77  | 0 | 0 | 0 | 0 | 0 | 74 | 0 | 0 | 0 |
|                                                                                                                                                                                                                                                                                                                                                                                                                                                                                                                                                                                                                                                                                                                                                                                                                      | 0 | 0 | 0 | 0 | 0 | 0 | 0 | 0 | 0 | 0 | 0 | 0 | 0 | 0 | 0 | 0 | 0 | 0   | 0 | 0 | 0 | 0 | 0 | 0  | 0 | 0 | 0 |
| M02255_77_000000000-ADUT3_1_1104_18185_22607 T---AC---GT-AG-GTG-----GCA-A-G-----C-G-T---T-GT-C-CGG-AA-----TT-A-C-T-GG-GC-----GT-A----AA-GG-GT-GC-----G-TA-G-G-C-G-----G--T-CC-T-T-T-----<br>-----AA---G-T-G-G-----G-A-T--G--TG--A-AA-TC--C-C-TG-G-G----CT-T-AA-----C-C-C-A-G-G-A-A-C---T-G-C-A--T-T-----C-CA-A-A--C-----T-G-G--AG--G-A-C---T-A-G-A-G-T-G---C-AG---GA-G-A-----G-G-A-A--AG-C-----GG--T--ATT---C-<br>C-C-A-GT--GT-A-G-CG-GT--G---A-A-A---TG-C-GT-AG--AG-A-TT--G-G--G-A-G-G-A-AC-A-CC--AG--T--A--GC-GAA-G-G-C--G-----G-C-T-T-T---CTG--G-AA-T-G-----T-A--A-C-T--GA--CG-C-T-G--A-GG--C-A-CG-A--AA-G-C---G-TG--GG-<br>G--AG-C-A-AA-----CA--GG Bacteria(100);Firmicutes(100);Clostridia(100);Clostridiales(100);Clostridiaceae(100);unclassified(100);unclassified(100);unclassified(100);unclassified(100); |   |   |   |   |   |   |   |   |   |   |   |   |   |   |   |   |   |     |   |   |   |   |   |    |   |   |   |
| Otu1532                                                                                                                                                                                                                                                                                                                                                                                                                                                                                                                                                                                                                                                                                                                                                                                                              | 0 | 0 | 0 | 0 | 0 | 0 | 0 | 0 | 0 | 0 | 0 | 0 | 0 | 0 | 0 | 0 | 0 | 0   | 0 | 0 | 0 | 0 | 0 | 0  | 0 | 0 | 0 |
|                                                                                                                                                                                                                                                                                                                                                                                                                                                                                                                                                                                                                                                                                                                                                                                                                      | 0 | 0 | 0 | 0 | 0 | 0 | 0 | 0 | 0 | 0 | 0 | 0 | 0 | 0 | 0 | 0 | 0 | 0   | 0 | 0 | 0 | 0 | 0 | 0  | 0 | 0 | 0 |
|                                                                                                                                                                                                                                                                                                                                                                                                                                                                                                                                                                                                                                                                                                                                                                                                                      | 0 | 0 | 0 | 0 | 0 | 0 | 0 | 0 | 0 | 0 | 0 | 0 | 0 | 0 | 0 | 0 | 0 | 123 | 0 | 0 | 0 | 0 | 0 | 0  | 0 | 0 | 0 |
|                                                                                                                                                                                                                                                                                                                                                                                                                                                                                                                                                                                                                                                                                                                                                                                                                      | 0 | 0 | 0 | 0 | 0 | 0 | 0 | 0 | 0 | 0 | 0 | 0 | 0 | 0 | 0 | 0 | 0 | 0   | 0 | 0 | 0 | 0 | 0 | 0  | 0 | 0 | 0 |
| M02255_77_000000000-ADUT3_1_1104_17845_22883 T---AC---GT-AG-GTG-----GCA-A-G-----C-G-T---T-GT-C-CGG-AA-----TT-A-C-T-GG-GT-----GT-A----AA-GG-GA-GC-----G-CA-G-G-C-G-----G--G-AC-T-G-C-----<br>-----AA---G-T-T-G-----G-A-A--G--TG--A-AA-TA--C-C-GC-A-G----CT-T-AA-----C-T-G-C-G-G-A-A-C---T-G-C-T---T-C-----C-AA-A-A--C-----T-G-T--AG--T-T-C---T-T-G-A-G-T-G---G-AG---TA-G-A-----G-G-T-A--GG-C-----GG--A--ATT---<br>C-C-G-A-GT--GT-A-G-CG-GT--G---A-A-A---TG-C-GT-AG--AT-A-TT--C-G--G-A-G-G-A-AC-A-CC--AG--T--G--GC-GAA-G-G-C--G-----G-C-C-T-A---CTG--G-GC-T-C-----T-T--A-C-T--GA--CG-C-T-G--A-GG--C-T-CG-A--AA-G-T---G-TG--GG-<br>G--AG-C-A-AA-----CA--GG Bacteria(100);Firmicutes(100);Clostridia(100);Clostridiales(100);unclassified(100);unclassified(100);unclassified(100);unclassified(100);unclassified(100);  |   |   |   |   |   |   |   |   |   |   |   |   |   |   |   |   |   |     |   |   |   |   |   |    |   |   |   |
| Otu1533                                                                                                                                                                                                                                                                                                                                                                                                                                                                                                                                                                                                                                                                                                                                                                                                              | 0 | 0 | 0 | 0 | 0 | 0 | 0 | 0 | 0 | 0 | 0 | 0 | 0 | 0 | 0 | 0 | 0 | 0   | 0 | 0 | 0 | 0 | 0 | 0  | 0 | 0 | 0 |
|                                                                                                                                                                                                                                                                                                                                                                                                                                                                                                                                                                                                                                                                                                                                                                                                                      | 0 | 0 | 0 | 0 | 0 | 0 | 0 | 0 | 0 | 0 | 0 | 0 | 0 | 0 | 0 | 0 | 0 | 0   | 0 | 0 | 0 | 0 | 0 | 0  | 0 | 0 | 0 |
|                                                                                                                                                                                                                                                                                                                                                                                                                                                                                                                                                                                                                                                                                                                                                                                                                      | 0 | 0 | 0 | 0 | 0 | 0 | 0 | 0 | 0 | 0 | 0 | 0 | 0 | 0 | 0 | 0 | 0 | 132 | 0 | 0 | 0 | 0 | 0 | 0  | 0 | 0 | 0 |
|                                                                                                                                                                                                                                                                                                                                                                                                                                                                                                                                                                                                                                                                                                                                                                                                                      | 0 | 0 | 0 | 0 | 0 | 0 | 0 | 0 | 0 | 0 | 0 | 0 | 0 | 0 | 0 | 0 | 0 | 0   | 0 | 0 | 0 | 0 | 0 | 0  | 0 | 0 | 0 |
| M02255_77_000000000-ADUT3_1_1105_15034_23589 T---AC---GG-AG-GGG-----GCT-A-G-----C-G-T---T-GT-T-CGG-AA-----TT-A-C-T-GG-GC-----GT-A----AA-GC-GT-                                                                                                                                                                                                                                                                                                                                                                                                                                                                                                                                                                                                                                                                       |   |   |   |   |   |   |   |   |   |   |   |   |   |   |   |   |   |     |   |   |   |   |   |    |   |   |   |



Otu1535 0 0 0 0 0 0 0 0 0 0 0 0 0 0 0 0 0 0 0 0 0 0 0 0 0 0 0 0  
0 0 0 0 0 0 0 0 0 0 0 0 0 0 0 0 0 0 0 0 0 0 0 0 0 0 0 0  
0 0 0 0 0 0 0 0 0 0 0 0 0 0 0 0 0 36 0 0 0 0 0 0 0 0 0 0  
0 0 0 0 0 0 0 0 0 0 0 0 0 0 0 0 0 0 0 0 0 0 0 0 0 0  
M02255\_77\_000000000-ADUT3\_1\_1113\_12972\_18835 T---AC---GT-AG-GTG-----GCG-A-G-----C-G-T---T-AT-C-CGG-AT-----TT-A-C-T-GG-GT-----GT-A---AA-GG-GT-GT-----G-TA-G-G-C-G-----G-G-AA-G-G-T-----  
-----AA---G-T-C-A-----G-A-T--G--TG--A-AA-TG--T-A-TG-G-G----CT-C-AA-----C-T-C-A-T-A-C-C-C---T-G-C-G---T-C-----T-GA-A-A---C-----T-G-C-TT-T-T-C---T-T-G-A-G-T-G---T-CG----GA-G-A-----G-G-T-A---AG-T-----GG--A-ATT---C-  
C-C-G-GT--GT-A-G-CG-GT--G---A-A-A---TG-C-GT-AG--AT-A-TC--G-G--G-A-G-G-A-AC-A-CC---GG--T-G--GC-GAA-G--G-C-G-----G--C-T-T-A---CTG--G--AC-G-A-----C-A---A-C-T-GA--CG-C-T-G--A-GA--C-A-CG-A-AA-G-T---G-TG--GG-  
G--AG-C-A-AA-----CA--GG Bacteria(100);unclassified(100);unclassified(100);unclassified(100);unclassified(100);unclassified(100);unclassified(100);unclassified(100);unclassified(100);

Otu1536 0 0 0 0 0 0 0 0 0 0 0 0 0 0 0 0 0 0 0 0 0 0 0 0 0 0 0 0  
0 0 0 0 0 0 0 0 0 0 0 0 0 0 0 0 0 0 0 0 0 0 0 0 0 0 0 0  
0 0 0 0 0 0 0 0 0 0 0 0 0 0 0 0 0 27 0 0 0 0 0 0 0 0 0 0  
0 0 0 0 0 0 0 0 0 0 0 0 0 0 0 0 0 0 0 0 0 0 0 0 0 0  
M02255\_77\_000000000-ADUT3\_1\_2103\_14782\_20951 T---AC---GT-AG-GGG-----GCA-A-G-----C-G-T---T-AT-C-CGG-AT-----TT-A-C-T-GG-GT-----GT-A---AA-GG-GA-GC-----G-TA-G-A-C-G-----G-C-AG-T-G-C-----  
-----AA---G-T-C-T-----G-A-A-G--TG--A-AA-TT--T-C-GC-G-G----CT-C-AA-----C-C-G-C-G-A-A-A-C---T-G-C-T---T-T-----G-GA-A-A---C-----T-G-T-AC-A-G-C---T-A-G-A-G-T-A---C-CG----GA-G-G-----G-G-T-A---AG-C-----GG--A-ATT---  
C-C-T-A-GT--GT-A-G-CG-GT--G---A-A-A---TG-C-GT-AG--AT-A-TT--A-G--G-A-A-G-A-AC-A-CC---GG--T-G--GC-GAA-G--G-C-G-----G--C-T-T-A---CTG--G--AC-G-G-----T-A---A-C-T-GA--CG-T-T-G--A-GG--C-T-CG-A-AA-G-C---G-TG--GG-  
G--AG-C-A-AA-----CA--GG Bacteria(100);Firmicutes(100);Clostridia(100);Clostridiales(100);Lachnospiraceae(100);unclassified(100);unclassified(100);unclassified(100);unclassified(100);

Otu1537 0 0 0 0 0 0 0 0 0 0 0 0 0 0 0 0 0 0 0 0 0 0 0 0 0 0 0 0  
0 0 0 0 0 0 0 0 0 0 0 0 0 0 0 0 0 0 0 0 0 0 0 0 0 0 0 0  
0 0 0 0 0 0 0 0 0 0 0 0 0 0 0 0 0 46 0 0 0 0 0 0 0 0 0 0  
0 0 0 0 0 0 0 0 0 0 0 0 0 0 0 0 0 0 0 0 0 0 0 0 0 0  
M02255\_77\_000000000-ADUT3\_1\_1106\_12441\_15759 T---AC---GT-AG-GTG-----GCA-A-G-----C-G-T---T-AT-C-CGG-AT-----TT-A-C-T-GG-GT-----GT-A---AA-GG-GT-GA-----G-TA-G-G-C-G-----G-G-AG-A-T-C-----  
-----AA---G-T-C-A-----G-A-T--G--TG--A-AA-TA--C-A-AA-G-G----CT-T-AA-----C-C-T-T-T-G-A-A-A-C---T-G-C-A---T-T-----T-GA-A-A---C-----T-G-T-TC-T-T-C---T-T-G-A-G-T-A---T-CG----GA-G-A-----G-G-T-A---AT-T-----GG--A-ATT---C-C-  
C-A-GT--GT-A-G-CG-GT--G---A-A-A---TG-C-GT-AG--AG-A-TT--G-G--G-A-G-G-A-AC-A-CC---AG--T-G--GC-GAA-G--G-C-G-----G--A-T-T-A---CTG--G--AC-G-A-----T-A---A-C-T-GA--CG-C-T-G--A-GG--C-A-CG-A-AA-G-T---G-TG--GG-G--  
AG-C-A-AA-----CA--GG Bacteria(100);unclassified(100);unclassified(100);unclassified(100);unclassified(100);unclassified(100);unclassified(100);unclassified(100);unclassified(100);

Otu1538 0 0 0 0 0 0 0 0 0 0 0 0 0 0 0 0 0 0 0 0 0 0 0 0 0 0 0 0  
0 0 0 0 0 0 0 0 0 0 0 0 0 0 0 0 0 0 0 0 0 0 0 0 0 0 0 0  
0 0 0 0 0 0 0 0 0 0 0 0 0 0 0 0 0 29 0 0 0 0 0 0 0 0 0 0  
0 0 0 0 0 0 0 0 0 0 0 0 0 0 0 0 0 0 0 0 0 0 0 0 0 0  
M02255\_77\_000000000-ADUT3\_1\_1103\_26239\_16610 T---AC---GA-AG-GGT-----GCA-A-G-----C-G-T---T-GT-T-CGG-AA-----TT-A-C-T-GG-GT-----GT-A---AA-GG-GC-GT-----G-TA-G-G-C-G-----G-A-TT-G-T-C-----  
-----AA---G-T-T-A-----G-T-G--G--TG--A-AA-CC--C-C-TG-G-G----CT-T-AA-----C-C-T-G-G-G-A-A-A-C---T-G--C-C---A-T-----T-GA-T-A---C-----T-G-A-TA--G-T-C---T-T-G-A-G-T-A---T-TG----GA-G-A-----G-G-A-T---AA-C-----GG--A-ATA---T-  
C-C-A-GT--GT-A-G-AG-GT--G---A-A-A---TT-C-GT-AG--AT-A-TT--G-G--A-T-A-G-A-AC-A-CC---GG--T-G--GC-GAA-G--G-C-G-----G--T-T-A-T---CTG--G--CC-G-A-----T-T---A-C-T-GA--CG-C-T-G--A-GG--C-G-CG-A-GA-G-C---G-TG--GG-G-  
-AG-C-A-AA-----CA--GG Bacteria(100);unclassified(100);unclassified(100);unclassified(100);unclassified(100);unclassified(100);unclassified(100);unclassified(100);unclassified(100);

Otu1539 0 0 0 0 0 0 0 0 0 0 0 0 0 0 0 0 0 0 0 0 0 0 0 0 0 0 0 0  
0 0 0 0 0 0 0 0 0 0 0 0 0 0 0 0 0 0 0 0 0 0 0 0 0 0 0 0  
0 0 0 0 0 0 0 0 0 0 0 0 0 0 0 0 0 7 0 0 0 0 0 0 0 0 0 0  
4 0 0 0 0 7 0 0 0 0 0 10 0 0 0 0 0 0 0 0 0 0 0 0 0 0 0  
M02255\_76\_000000000-ADUNE\_1\_2114\_10632\_17368 C---AA---GC-CA-CGG-----CTA-A-C-----T--A--C---G--TG-C-CAG-CA-----GC-C--G-C--GG-TA-----AT--A---CG-TA-GG-TG-----G-CA-A-G-C-G-----T--T-GT-C-C-G-----  
-----GA---G-T-C-C-----A-T-C--T--TA--A-AA-GT--G-C-GG-G-G----CT-T-AA-----C-C-C-C-G-T-G--A-----T-G--G-G---A-T-----G--GA-A-A---C-----T-G-G--GA--A-G-C---T-G-G-A-G-T-A---T-CG----GA-G-A-----G-G-A-A---AG-T-----GG--A-ATT---C-  
C-T-A-GT--GT-A-G-CG-GT--G---A-A-A---TG-C-GT-AG--AG-A-TT--A-G--G-A-A-G-A-AC-A-CC---GG--T-G--GC-GAA-G--G-C-G-----A-C-T-T-T---CTG--G--AC-G-A-----A-A---A-C-T-GA--CG-C-T-G--A-GG--C-G-CG-A-AA-G-C---G-TG--GG-  
G--AG-C-A-AA-----CA--GG Bacteria(100);Firmicutes(100);Clostridia(100);Clostridiales(100);Veillonellaceae(100);Dialister(100);unclassified(100);unclassified(100);unclassified(100);



|                                                                                                                                                                                                                              |   |   |   |   |   |   |   |   |   |   |   |   |   |   |   |   |   |   |   |    |   |   |   |   |   |   |    |
|------------------------------------------------------------------------------------------------------------------------------------------------------------------------------------------------------------------------------|---|---|---|---|---|---|---|---|---|---|---|---|---|---|---|---|---|---|---|----|---|---|---|---|---|---|----|
| Otu1540                                                                                                                                                                                                                      | 0 | 0 | 0 | 0 | 0 | 0 | 0 | 0 | 0 | 0 | 0 | 0 | 0 | 0 | 0 | 0 | 0 | 0 | 0 | 0  | 0 | 0 | 0 | 0 | 0 | 0 | 0  |
|                                                                                                                                                                                                                              | 0 | 0 | 0 | 0 | 0 | 0 | 0 | 0 | 0 | 0 | 0 | 0 | 0 | 0 | 0 | 0 | 0 | 0 | 0 | 0  | 0 | 0 | 0 | 0 | 0 | 0 | 0  |
|                                                                                                                                                                                                                              | 0 | 0 | 0 | 0 | 0 | 0 | 0 | 0 | 0 | 0 | 0 | 0 | 0 | 0 | 0 | 0 | 0 | 0 | 0 | 0  | 0 | 0 | 0 | 0 | 0 | 0 | 0  |
|                                                                                                                                                                                                                              | 0 | 0 | 0 | 0 | 0 | 9 | 0 | 0 | 0 | 8 | 0 | 0 | 0 | 0 | 0 | 0 | 0 | 0 | 0 | 0  | 0 | 0 | 0 | 0 | 0 | 0 | 0  |
| M02255_77_000000000-ADUT3_1_1102_15601_12055 T---AC---GT-AG-GGG-----GCG-A-G-----C-G--T--T--AT-C-CGG-AT-----TC-A--T-T--GG-GC-----GT--A----AA-GC-GC-GC-----G-TA-G-G-C-G-----G--C-CT-G-T-T-----                                 |   |   |   |   |   |   |   |   |   |   |   |   |   |   |   |   |   |   |   |    |   |   |   |   |   |   |    |
| -----AG---G-T-C-A-----A-G-A--G--TT--A-AA-TC--C-G-GG-G-G-----CT-C-AA-----C-C-C-C-C-G-T--C-----C-G--C-T--C-C-----T--GA-T-A--C-----C--G-G--CA--G-G-C---T-T-G-A-G-T--C---T-GG-----TA-G-G-----G-G-A-A---GG-C-----GG--A--ATT---C-  |   |   |   |   |   |   |   |   |   |   |   |   |   |   |   |   |   |   |   |    |   |   |   |   |   |   |    |
| C-A-A-GT--GT-A-G-CG-GT--G---G--A-A---TG-C-GC-AG--AT-A-TT--T-G--G-A-A-G-A-AC-A-CC---GG--T--G--GC-GAA-G--G-C--G-----G--C-C-T-T---CTG--G--GC-C-A-----C-G---A-C-T--GA--CG-C-T-G--A-GG--C-G-CG-A--AA-G-C---T-AG--GG-              |   |   |   |   |   |   |   |   |   |   |   |   |   |   |   |   |   |   |   |    |   |   |   |   |   |   |    |
| G--AG-C-A-AA-----CA--GG Bacteria(100);Actinobacteria(100);Actinobacteria(100);Coriobacteridae(100);Coriobacteriales(100);Coriobacterineae(100);Coriobacteriaceae(100);Olsenella(100);unclassified(100);                      |   |   |   |   |   |   |   |   |   |   |   |   |   |   |   |   |   |   |   |    |   |   |   |   |   |   |    |
| Otu1541                                                                                                                                                                                                                      | 0 | 0 | 0 | 0 | 0 | 0 | 0 | 0 | 0 | 0 | 0 | 0 | 0 | 0 | 0 | 0 | 0 | 0 | 0 | 0  | 0 | 0 | 0 | 0 | 0 | 0 | 0  |
|                                                                                                                                                                                                                              | 0 | 0 | 0 | 0 | 0 | 0 | 0 | 0 | 0 | 0 | 0 | 0 | 0 | 0 | 0 | 0 | 0 | 0 | 0 | 0  | 0 | 0 | 0 | 0 | 0 | 0 | 0  |
|                                                                                                                                                                                                                              | 0 | 0 | 0 | 0 | 0 | 0 | 0 | 0 | 0 | 0 | 0 | 0 | 0 | 0 | 0 | 0 | 0 | 0 | 0 | 1  | 0 | 0 | 0 | 0 | 0 | 0 | 26 |
|                                                                                                                                                                                                                              | 0 | 0 | 0 | 0 | 0 | 4 | 0 | 0 | 0 | 0 | 0 | 0 | 0 | 0 | 0 | 0 | 0 | 0 | 0 | 0  | 0 | 0 | 0 | 0 | 0 | 0 | 0  |
| M02255_77_000000000-ADUT3_1_1104_6099_15840 T---AC---GT-AG-GGG-----GCG-A-G-----C--G--T--T--AT-C-CGG-AA-----TT-A--T-T--GG-GC-----GTA-----AA-GA-GT-GC-----G-TA-G-G-T-G-----G--T-TA-T-C-T-----AA-                               |   |   |   |   |   |   |   |   |   |   |   |   |   |   |   |   |   |   |   |    |   |   |   |   |   |   |    |
| ---G-C-G-T-----G-G-G--G--TG--A-AA-GG--C-A-GT-G-G-----CT-T-AA-----C-C-A-T-T-G-T-A-----A-G--C-C---T-T-----G--CG-A-A--C-----T--G-G--AT--A-G-C---T-T-G-A-G-T--G---C-AG-----GA-G-G-----G-G-A-A---AG-T-----GG--A--ATT---C-C-T-A-   |   |   |   |   |   |   |   |   |   |   |   |   |   |   |   |   |   |   |   |    |   |   |   |   |   |   |    |
| GT--GT-A-G-CG-GT--G---A--A-A---TG-C-GT-AG--AT-A-TT--A-G--G-A-G-G-A-AC-A-CC---GG--T--G--GC-GAA-G--G-C--G-----G--C-T-T-T---CTG--G--AC-T-G-----T-A---A-C-T--GA--CA-C-T-G--A-GG--C-A-CG-A--AA-G-C---G-TG--GG-T-AG-C-             |   |   |   |   |   |   |   |   |   |   |   |   |   |   |   |   |   |   |   |    |   |   |   |   |   |   |    |
| A-AA-----CA--GG Bacteria(100);Firmicutes(100);Clostridia(100);Clostridiales(100);Family_XIII_Incertae_Sedis(100);unclassified(100);unclassified(100);unclassified(100);unclassified(100);                                    |   |   |   |   |   |   |   |   |   |   |   |   |   |   |   |   |   |   |   |    |   |   |   |   |   |   |    |
| Otu1542                                                                                                                                                                                                                      | 0 | 0 | 0 | 0 | 0 | 0 | 0 | 0 | 0 | 0 | 0 | 0 | 0 | 0 | 0 | 0 | 0 | 0 | 0 | 0  | 0 | 0 | 0 | 0 | 0 | 0 | 0  |
|                                                                                                                                                                                                                              | 0 | 0 | 0 | 0 | 0 | 0 | 0 | 0 | 0 | 0 | 0 | 0 | 0 | 0 | 0 | 0 | 0 | 0 | 0 | 0  | 0 | 0 | 0 | 0 | 0 | 0 | 0  |
|                                                                                                                                                                                                                              | 0 | 0 | 0 | 0 | 0 | 0 | 0 | 0 | 0 | 0 | 0 | 0 | 0 | 0 | 0 | 0 | 0 | 0 | 0 | 33 | 0 | 0 | 0 | 0 | 0 | 0 | 0  |
|                                                                                                                                                                                                                              | 0 | 0 | 0 | 0 | 0 | 0 | 0 | 0 | 0 | 0 | 0 | 0 | 0 | 0 | 0 | 0 | 0 | 0 | 0 | 0  | 0 | 0 | 0 | 0 | 0 | 0 | 0  |
| M02255_77_000000000-ADUT3_1_1102_21345_16078 T---AC---AG-AG-GGT-----GCT-A-G-----C--G--T--T--GT-C-CGG-AA-----TC-A--C-T--GG-GC-----GT--A----AA-GG-GC-GC-----G-TA-G-G-C-G-----G--C-CC-G-A-T-----                                |   |   |   |   |   |   |   |   |   |   |   |   |   |   |   |   |   |   |   |    |   |   |   |   |   |   |    |
| -----AA---G-T-A-G-----G-G-G--G--TG--A-AA-TC--T-T-GC-G-G-----CT-C-AA-----C-C-G-C-A-A-G--G-C---T-G--C-C---T-T-----C--TA-A-A--C-----T--G-T--CG--G-G-C---T-G-G-A-G-C--A---C-GG-----TA-G-A-----G-G-C-A--GA-T-----GG--A--ATT---    |   |   |   |   |   |   |   |   |   |   |   |   |   |   |   |   |   |   |   |    |   |   |   |   |   |   |    |
| C-C-C-G-GT--GT-A-G-CG-GT--G---G--A-A---TG-C-GT-AG--AG-A-TC--G-G--G-A-A-G-A-AC-A-CC---AG--T--G--GC-GAA-G--G-C--G-----G--T-C-T-G---CTG--G--GC-CG-----T-T---G-C-T--GA--CG-C-T-G--A-GG--C-G-CG-A--CA-G-C---G-TG--                |   |   |   |   |   |   |   |   |   |   |   |   |   |   |   |   |   |   |   |    |   |   |   |   |   |   |    |
| GG-G--AG-C-A-AA-----CA--GG Bacteria(100);unclassified(100);unclassified(100);unclassified(100);unclassified(100);unclassified(100);unclassified(100);unclassified(100);unclassified(100);                                    |   |   |   |   |   |   |   |   |   |   |   |   |   |   |   |   |   |   |   |    |   |   |   |   |   |   |    |
| Otu1543                                                                                                                                                                                                                      | 0 | 0 | 0 | 0 | 0 | 0 | 0 | 0 | 0 | 0 | 0 | 0 | 0 | 0 | 0 | 0 | 0 | 0 | 0 | 0  | 0 | 0 | 0 | 0 | 0 | 0 | 0  |
|                                                                                                                                                                                                                              | 0 | 0 | 0 | 0 | 0 | 0 | 0 | 0 | 0 | 0 | 0 | 0 | 0 | 0 | 0 | 0 | 0 | 0 | 0 | 0  | 0 | 0 | 0 | 0 | 0 | 0 | 0  |
|                                                                                                                                                                                                                              | 0 | 0 | 0 | 0 | 0 | 0 | 0 | 0 | 0 | 0 | 0 | 0 | 0 | 0 | 0 | 0 | 0 | 0 | 0 | 39 | 0 | 0 | 0 | 0 | 0 | 0 | 0  |
|                                                                                                                                                                                                                              | 0 | 0 | 0 | 0 | 0 | 0 | 0 | 0 | 0 | 0 | 0 | 0 | 0 | 0 | 0 | 0 | 0 | 0 | 0 | 0  | 0 | 0 | 0 | 0 | 0 | 0 | 0  |
| M02255_77_000000000-ADUT3_1_1105_5671_7124 G---AC---GG-AG-GAT-----GCA-A-G-----C--G--T--T--AT-C-CGG-AA-----TG-A--T-T--GG-GC-----GT--A----AA-GC-GT-CC-----G-CA-G-G-T-G-----G--C-TA-T-T-C-----AA-                               |   |   |   |   |   |   |   |   |   |   |   |   |   |   |   |   |   |   |   |    |   |   |   |   |   |   |    |
| ---G-T-C-T-----G-C-T--G--TC--A-AA-GA--G-C-AA-G-G-----CT-C-AA-----C-C-T-T-G-T-C--A-A---G-G--C-A--G--T-----G--GA-A-A--C-----T--G-A--AA--G-G-C---T-A-G-A-G-T--G---T-GG-----TA-G-G-----G-G-T-A--GA-G-----GG--A--ATT---C-C-C-A-   |   |   |   |   |   |   |   |   |   |   |   |   |   |   |   |   |   |   |   |    |   |   |   |   |   |   |    |
| GT--GT-A-G-CG-GT--G---A--A-A---TG-C-GT-AG--AG-A-TT--G-G--G-A-A-G-A-AC-A-CC---GG--T--G--GC-GAA-A--G-C--G-----C--T-C-T-A---CTG--G--AC-C-T-----G-C---A-C-T--GA--CA-C-T-G--A-GG--G-A-CG-A--AA-G-C---T-AG--GG-G--AG-              |   |   |   |   |   |   |   |   |   |   |   |   |   |   |   |   |   |   |   |    |   |   |   |   |   |   |    |
| C-G-AA-----TG--GG Bacteria(100);Cyanobacteria(100);unclassified(100);unclassified(100);unclassified(100);unclassified(100);unclassified(100);unclassified(100);unclassified(100);                                            |   |   |   |   |   |   |   |   |   |   |   |   |   |   |   |   |   |   |   |    |   |   |   |   |   |   |    |
| Otu1544                                                                                                                                                                                                                      | 0 | 0 | 0 | 0 | 0 | 0 | 0 | 0 | 0 | 0 | 0 | 0 | 0 | 0 | 0 | 0 | 0 | 0 | 0 | 0  | 0 | 0 | 0 | 0 | 0 | 0 | 0  |
|                                                                                                                                                                                                                              | 0 | 0 | 0 | 0 | 0 | 0 | 0 | 0 | 0 | 0 | 0 | 0 | 0 | 0 | 0 | 0 | 0 | 0 | 0 | 0  | 0 | 0 | 0 | 0 | 0 | 0 | 0  |
|                                                                                                                                                                                                                              | 0 | 0 | 0 | 0 | 0 | 0 | 0 | 0 | 0 | 0 | 0 | 0 | 0 | 0 | 0 | 0 | 0 | 0 | 0 | 6  | 0 | 0 | 0 | 0 | 0 | 0 | 0  |
|                                                                                                                                                                                                                              | 0 | 0 | 0 | 0 | 0 | 0 | 0 | 0 | 0 | 0 | 0 | 0 | 0 | 0 | 0 | 0 | 0 | 0 | 0 | 0  | 0 | 0 | 0 | 0 | 0 | 0 | 0  |
| M02255_77_000000000-ADUT3_1_1108_12409_13968 T---AC---GG-AG-GGG-----GTT-A-G-----C--G--T--T--GT-T-CGG-AA-----TT-A--C-T--GG-GC-----GT--A----AA-GC-GT-AC-----G-TA-G-G-C-G-----G--A-TC-A-G-C-----                                |   |   |   |   |   |   |   |   |   |   |   |   |   |   |   |   |   |   |   |    |   |   |   |   |   |   |    |
| -----AA---G-T-A-T-----G-G-G--G--TG--A-AA-TC--C-C-GG-G-G-----CT-C-AA-----C-C-C-C-G-G-A--A-C---T-G--C-C---T-C-----G--TA-A-A--C-----T--G-T--TG--G-T-C---T-T-G-A-G-T--T---C-GA-----GA-G-A-----G-G-T-G---AG-T-----GG--A--ATT---C- |   |   |   |   |   |   |   |   |   |   |   |   |   |   |   |   |   |   |   |    |   |   |   |   |   |   |    |
| C-G-A-GT--GT-A-G-AG-GT--G---A--A-A---TT-C-GT-AG--AT-A-TT--C-G--G-A-G-G-A-AC-A-CC---AG--T--G--GC-GAA-G--G-C--G-----G--C-T-C-A---CTG--G--CT-C-G-----A-T---A-C-T--GA--CG-C-T-G--A-GG--T-A-CG-A--AA-G-T---G-TG--GG-G-            |   |   |   |   |   |   |   |   |   |   |   |   |   |   |   |   |   |   |   |    |   |   |   |   |   |   |    |
| -AG-C-A-AA-----CA--GG Bacteria(100);Proteobacteria(100);Alphaproteobacteria(100);Rhodobacterales(100);Rhodobacteraceae(100);unclassified(100);unclassified(100);unclassified(100);unclassified(100);                         |   |   |   |   |   |   |   |   |   |   |   |   |   |   |   |   |   |   |   |    |   |   |   |   |   |   |    |



Otu1545 0 0 0 0 0 0 0 0 0 0 0 0 0 0 0 0 0 0 0 0 0 0 0 0 0 0 0 0  
0 0 0 0 0 0 0 0 0 0 0 0 0 0 0 0 0 0 0 0 0 0 0 0 0 0 0 0  
0 0 0 0 0 0 0 0 0 0 0 0 0 0 0 0 0 0 0 0 9 0 0 0 0 0 0 0  
0 0 0 0 0 0 0 0 0 0 0 0 0 0 0 0 0 0 0 0 0 0 0 0 0 0 0  
M02255\_77\_000000000-ADUT3\_1\_2103\_24119\_6977 T---AC--AG-AG-GCC-----TCA-A-G-----C-G--T--T--AT-C-CGG-AT-----TT-A-T-T--GG-GC-----GT--A----AA-GC-GT-AT-----G-TA-G-G-C-G-----G--G-TA-T-A-T-----TA--  
--G-T-C-G-----C-A-G-G--TC--A-AA-TC--T-C-CG-A-G----CC-C-AA-----C-T-C-G-G-A-A--A-C---T-G--C-T--T-G-----C-GA-A-A--C-----G--G-T-AT--A-T-C---T-A-G-A-G-G--A--T-GT----GA-G-A-----G-A-T-G--AC-T-----GG--A--ACT---C-A-T-G-  
GT--GT-A-G-TA-GT--G---A--A---TG-C-GT-TG--AT-A-TC--A-T--G-G-G-G-A-AC-A-CC--AA--A--G--GC-GAA-G--G-C--A-----G--G-T-C-A--TTG--G--CA-C-A-----T-T---C-C-T--GA--CG-C-T-C--A-G-A-T-A-CG-A--AA-G-C---G-TG--GG-T--AG-C-  
G-AA-----TG--GG Bacteria(100);unclassified(100);unclassified(100);unclassified(100);unclassified(100);unclassified(100);unclassified(100);unclassified(100);unclassified(100);

Otu1546 0 0 0 0 0 0 0 0 0 0 0 0 0 0 0 0 0 0 0 0 0 0 0 0 0 0 0 0  
0 0 0 0 0 0 0 0 0 0 0 0 0 0 0 0 0 0 0 0 0 0 0 0 0 0 0 0  
0 0 0 0 0 0 0 0 0 0 0 0 0 0 0 0 0 22 0 0 0 0 0 0 0 0 0 0  
0 0 0 0 0 0 0 0 0 0 0 0 0 0 0 0 0 0 0 0 0 0 0 0 0 0 0  
M02255\_76\_000000000-ADUNE\_1\_1101\_7382\_19940 T---A---AC-TC-TGT-----GCC-A-G-----C---A--G--CC-G-CGG-TA-----AG-A--C-A--GA-GG-----GT--G---CA--A-AC-GT-----TG-C-T-C-G-----G--A-TT-G-G-G-----AA----  
G-T-C-G-----G-G-T-G--TG--A-AA-TC--C-C-TG-G-G-----CT-C-AA-----C-C-T-A-G-G-A--A-C---T-G--C-A--T-T-----C-GA-A-A--C-----T-C-T-CA--A-T-C---T-A-G-A-G-T-G--A-CG----GA-G-A-----G-G-A-A--AG-C-----GG--A--ATT---C-C-C-G-GT--  
GT-A-G-AG-GT--G---A--A---TT-C-GT-AG--AT-A-TC--G-G--G-A-G-G-A-AC-A-CC--AG--A--G--GC-GAA-G--G-C--G-----G--C-T-T-T---CTG--G--AC-G-T-----C-A--A-C-T--GA--CG-C-T-G--A-GG--C-G-CG-A--AA-G-C---G-TG--GG-G--AG-C-A-  
AA-----CA--GG Bacteria(100);Proteobacteria(100);unclassified(100);unclassified(100);unclassified(100);unclassified(100);unclassified(100);unclassified(100);unclassified(100);

Otu1547 0 0 0 0 0 0 0 0 0 0 0 0 0 0 0 0 0 0 0 0 0 0 0 0 0 0 0 0  
0 0 0 0 0 0 0 0 0 0 0 0 0 0 0 0 0 0 0 0 0 0 0 0 0 0 0 0  
0 0 0 0 0 0 0 0 0 0 0 0 0 0 0 0 0 85 0 0 0 0 0 0 0 0 0 0  
0 0 0 0 0 0 0 0 0 0 0 0 0 0 0 0 0 0 0 0 0 0 0 0 0 0 0  
M02255\_77\_000000000-ADUT3\_1\_1103\_6493\_13789 T---AC--GT-AG-GGA-----CCA-A-G-----C--G--T--T--GT-T-CGG-AT-----TT-A--C-T--GG-GC-----GT--A----AA-GG-GC-GC-----G-TA-G-G-C-G-----G--C-AA-T-T-C-----AA--  
--G-T-C-A-----G-C-T--G--TG--A-AA-TC--T-C-CG-G-G-----CT-T-AA-----C-T-C-G-G-A-A--C-G---G-T--C-A--G--C-----T--GA-T-A--C-----T--G-T--TT--T-G-C---T-A-G-A-G-T-G--C-AG----AA-G-G-----G-G-C-A--AT-C-----GG--A--ATT---C-T-C-G-  
GT--GT-A-G-CG-GT--G---A--A---TG-C-GT-AG--AT-A-TC--G-A--G-A-G-G-A-AC-A-CC--TG--A--G--GT-GAA-G--A-C--G-----G--G-T-T-G---CTG--G--GC-T-G-----A-C---A-C-T--GA--CG-C-T-G--A-TG--C-G-CG-A--AA-G-C---C-AG--GG-T--AG-  
C-A-AA-----CG--GG Bacteria(100);Acidobacteria(100);Acidobacteria(100);Acidobacteriales(100);Acidobacteriaceae(100);Candidatus\_Chloroacidobacterium(100);unclassified(100);unclassified(100);unclassified(100);

Otu1548 0 0 0 0 0 0 0 0 0 0 0 0 0 0 0 0 0 0 0 0 0 0 0 0 0 0 0 0  
0 0 0 0 0 0 0 0 0 0 0 0 0 0 0 0 0 0 0 0 0 0 0 0 0 0 0 0  
0 0 0 0 0 0 0 0 0 0 0 0 0 0 0 0 0 57 0 0 0 0 0 0 0 0 0 0  
10 0 0 0 0 0 0 0 0 0 0 0 0 0 0 0 0 0 0 0 0 0 0 0 0 0 0  
M02255\_77\_000000000-ADUT3\_1\_1101\_27410\_15960 T---AC--GT-AG-GGA-----GCG-A-G-----C--G--T--T--AT-C-CGG-AA-----TT-A--C-T--GG-GC-----GT--A----AA-GG-GC-GC-----G-TA-G-G-C-G-----G--A-AT-G-A-C---  
-----AA---G-T-C-A-----G-CAA--G--TG--A-AA-GC--G-T-GG-G-G-----CT-C-AA-----C-C-C-C-A-T-G--A-----T-G--C-G--G--C-----T--GA-A-A--C-----T--G-T--TA--T-T-C---T-A-G-A-G-G--C---A-TG----GA-G-A-----G-G-C-A--AA-C-----GG--A--ATT---  
C-C-C-G-GT--GT-A-G-CG-GT--G---A--A---TG-C-GT-AG--AT-A-TC--G-G--G-A-G-A-AC-A-CC--AG--T--G--GC-GAA-G--G-C--G-----G--T-T-T-G---CTG--G--CC-A-T-----G-A--A-C-T--GA--CG-C-T-C--ATAG--C-G-CG-A--AA-G-C---T-AG--  
GG-T--AG-C-A-AA-----CG--GG Bacteria(100);Synergistetes(100);Synergistia(100);Synergistales(100);Synergistaceae(100);Jonquetella(100);unclassified(100);unclassified(100);unclassified(100);

Otu1549 0 0 0 0 0 0 0 0 0 0 0 0 0 0 0 0 0 0 0 0 0 0 0 0 0 0 0 0  
0 0 0 0 0 0 0 0 0 0 0 0 0 0 0 0 0 0 0 0 0 0 0 0 0 0 0 0  
0 0 0 0 0 0 0 0 0 0 0 0 0 0 0 0 0 23 0 0 0 0 0 0 0 0 0 0  
0 0 0 0 0 0 0 0 0 0 0 0 0 0 0 0 0 0 0 0 0 0 0 0 0 0 0  
M02255\_77\_000000000-ADUT3\_1\_1101\_20031\_9546 T---AC--GT-AG-GTG-----GCA-A-G-----C--G--T--T--GT-C-CGG-AT-----TT-A--C-T--GG-GT-----GT--A----AA-GG-GC-GT-----G-TA-G-A-C-G-----G--G-AC-T-G-C-----AA--  
--G-T-C-A-----G-A-T--G--TG--A-AA-TT--T-A-TG-G-G-----CT-C-AA-----C-C-C-A-T-A-A--C-C---T-G--C-A--T-T-----T--GA-A-A--C-----T--G-T--GG--T-T-C---T-T-G-A-G-T-G--A-TG----GA-G-A-----G-G-T-A--AG-C-----GG--A--ATT---C-C-T-A-  
GT--GT-A-G-CG-GT--G---A--A---TG-C-GT-AG--AT-A-TT--A-G--G-A-G-G-A-AC-A-CC--GG--T--G--GC-GAA-G--G-C--G-----G--C-T-T-A---CTG--G--AC-A-T-----T-A--A-C-T--GA--CG-C-T-G--A-GG--C-G-CG-A--AA-G-T---G-TG--GG-G--AG-  
C-A-AA-----CA--GG Bacteria(100);Firmicutes(100);Clostridia(100);Clostridiales(100);unclassified(100);unclassified(100);unclassified(100);unclassified(100);unclassified(100);



Otu1550      0      0      0      0      0      0      0      0      0      0      0      0      0      0      0      0      0      0      0      0      0      0      0      0      0      0      0  
             0      0      0      0      0      0      0      0      0      0      0      0      0      0      0      0      0      0      0      0      0      0      0      0      0      0      0      0  
             0      0      0      0      0      0      0      0      0      0      0      0      0      0      0      20      0      0      0      0      0      0      0      0      0      0      0  
             0      0      0      0      0      0      0      0      0      0      0      0      63      0      287      236      83      0      0      0      0      0      0      0      0      0  
             M02255\_77\_000000000-ADUT3\_1\_1118\_6019\_18654 T---AC---GT-AG-GCA-----GCA-A-G-----C-G--T---T--GT-T-CGG-AA-----TT-A--C-T--GG-GC-----GT--A----AA-GA-GC-TC-----G-TA-G-G-C-G-----G--T-TT-G-C-T-----AA--  
--G-T-T-T-----G-G-T-G--TG--A-AA-TC--T-C-CC-G-G----CT-T-AA-----C-T-G-G-G-A-G--G-G---T-G--C-G---C-C-----G--AA-A-A---C-----T--G-G--CA-G-A-C---T-C-G-A-G-T--G--C-GG----GA-A-A-----G-G-A-A--AG-C-----GG--A--ATT---C-C-T-G-  
GT--GT-A-G-CG-GT--G---A--A---TG-C-GT-AG--AT-A-TC--A-G--G-A-G-G-A-AC-A-CC---TG--T--G--GT-GTA-G--A-C--G-----G--C-T-T-T---CTG--G--AC-C-G-----T-A--A-C-T--GA--CG-C-T-G--A-GG--A-G-CG-A--AA-G-C---G-TG--GG-T--AG-C-  
A-AA-----CA--GG      Bacteria(100);unclassified(100);unclassified(100);unclassified(100);unclassified(100);unclassified(100);unclassified(100);unclassified(100);unclassified(100);

Otu1551      0      0      0      0      0      0      0      0      0      0      0      0      0      0      0      0      0      0      0      0      0      0      0      0      0      0      0  
             0      0      0      0      0      0      0      0      0      0      0      0      0      0      0      0      0      0      0      0      0      0      0      0      0      0      0      0  
             0      0      0      0      0      0      0      0      0      0      0      0      0      0      0      15      0      0      0      0      0      0      0      0      0      0      0  
             0      0      0      0      0      0      0      0      0      0      0      0      0      0      0      0      0      0      0      0      0      0      0      0      0      0      0  
             M02255\_77\_000000000-ADUT3\_1\_1118\_4385\_14764 G---AC---GA-AG-GGG-----GCG-A-G-----C-G--T---T--GT-T-CGG-AA-----TC-A--C-T--GG-GC-----GT--A----AA-GG-GC-GC-----G-TA-G-G-C-G-----G--C-GC-A-A-T-----  
CA---G-T-C-A-----G-G-C-G--TG--A-AA-GC--C-C-CG-A-G----CT-C-AA-----C-T-T-G-G-G-A--A-T---A-G--C-G---C-T-----T--GA-T-A---C-----T--A-T--TG--T-G-C---T-A-G-A-G-A-G---C-GG----GA-G-A-----G-G-A-T--GG-T-----GG--A--ATT---C-C-C-  
A-GT--GT-A-G-AG-GT--G---A--A---TT-C-GT-AG--AT-A-TT--G-G--G-A-A-G-A-AC-A-CC---GG--T--G--GC-GAA-G--G-C--G-----G--C-C-A-T---CTG--G--AC-C-G-----T-T---T-C-T--GA--CG-C-T-G--A-GG--C-G-CG-A--AA-G-C---G-TG--GG-G--  
AG-C-A-AA-----CA--GG      Bacteria(100);Proteobacteria(100);Alphaproteobacteria(100);Rhodospirillales(100);unclassified(100);unclassified(100);unclassified(100);unclassified(100);unclassified(100);

Otu1552      0      0      0      0      0      0      0      0      0      0      0      0      0      0      0      0      0      0      0      0      0      0      0      0      0      0      0  
             0      0      0      0      0      0      0      0      0      0      0      0      0      0      0      0      0      0      0      0      0      0      0      0      0      0      0      0  
             0      0      0      0      0      0      0      0      0      0      0      0      0      0      0      19      0      0      0      0      0      0      0      0      0      0      0  
             0      0      0      0      0      0      0      0      0      0      0      0      0      0      0      0      0      0      0      0      0      0      0      0      0      0      0  
             M02255\_77\_000000000-ADUT3\_1\_1111\_24050\_19375                G---AC---GA-GG-GAT-----CCT-A-G-----C-G--T---T--GT-T-CGG-AA-----TC-A--T-T--GG-GC-----GT--A----AA-GC-GG-GT-----G-TA-G-G-T-G-----G--G-CT-T-C-T-----  
-----AA---G-T-C-A-----G-A-T-G--TG--A-AA-TC--C-C-AG-G-G----CT-C-AA-----C-C-C-T-G-G-A--A-G---T-G--C-A---T-T-----T--GA-T-A---C-----T--G-G--AA-G-T-C---T-T-G-A-G-T--G---T-GG----TA-G-A-----G-G-T-T---AC-T-----GG--A--ATT---G-  
T-T-G-GT--GT-A-G-TG-GT--G---A--A---TA-C-GT-AG--AT-A-TC--A-A--C-A-G-G-A-AT-A-CC---GG--A--G--GC-GAA-G--G-C--G-----A--G-T-A-A---CTG--G--GC-C-A-----A-C---A-C-T--GA--CA-C-T-G--A-GA--C-C-CG-A--AA-G-C---G-TG--GG-  
G--AT-C-A-AA-----CA--GG      Bacteria(100);Proteobacteria(100);Deltaproteobacteria(100);Bdellovibrionales(100);Bdellovibrionaceae(100);Bdellovibrio(100);unclassified(100);unclassified(100);unclassified(100);

Otu1553      0      0      0      0      0      0      0      0      0      0      0      0      0      0      0      0      0      0      0      0      0      0      0      0      0      0      0  
             0      0      0      0      0      0      0      0      0      0      0      0      0      0      0      0      0      0      0      0      0      0      0      0      0      0      0      0  
             0      0      0      0      0      0      0      0      0      0      0      0      0      0      0      15      0      0      0      0      0      0      0      0      0      0      0  
             0      0      0      0      0      0      0      0      0      0      0      0      0      0      0      0      0      0      0      0      0      0      0      0      0      0      0  
             M02255\_77\_000000000-ADUT3\_1\_2107\_14300\_14994                T---AC---GT-AG-GGA-----GCG-A-G-----C-G--T---T--GT-C-CGG-AT-----TT-A--C-T--GG-GT-----GT--A----AA-GG-GT-GC-----G-TA-G-G-C-G-----G--A-AG-A-G-C---  
-----AA---G-T-C-A-----G-T-A--G--TG--A-AA-TC--C-A-TG-G-G----CT-T-AA-----C-C-C-G-T-G-A--A-C---T-G--C-T---A-T-----T--GA-A-A---C-----T--G-T--TC--T-T-C---T-T-G-A-G-T--G---A-AG----TA-G-A-----G-G-T-A---GG-C-----GG--A--ATT---C-  
C-C-G-GT--GT-A-G-CG-GT--G---A--A---TG-C-GT-AG--AG-A-TC--G-G--G-A-G-G-A-AC-A-CC---AG--T--G--GC-GAA-G--G-C--G-----G--C-C-T-A---CTG--G--GC-T-T-----T-A--A-C-T--GA--CG-C-T-G--A-GG--C-A-CG-A--AA-G-C---A-TG--GG-  
T--AG-C-A-AA-----CA--GG      Bacteria(100);unclassified(100);unclassified(100);unclassified(100);unclassified(100);unclassified(100);unclassified(100);unclassified(100);unclassified(100);

Otu1554      0      0      0      0      0      0      0      0      0      0      0      0      0      0      0      0      0      0      0      0      0      0      0      0      0      0      0  
             0      0      0      0      0      0      0      0      0      0      0      0      0      0      0      0      0      0      0      0      0      0      0      0      0      0      0      0  
             0      0      0      0      0      0      0      0      0      0      0      0      0      0      0      20      0      0      0      0      3      0      0      0      0      0      0  
             0      0      0      0      0      0      0      0      0      0      0      0      0      0      0      0      0      0      0      0      0      0      0      0      0      0      0  
             M02255\_77\_000000000-ADUT3\_1\_1119\_20598\_11969                C---AC---GT-AG-GGT-----GCA-A-G-----C-G--T---T--GT-C-CGG-AT-----TT-A--T-T--GG-GC-----GT--A----AA-GG-GC-TC-----G-TA-G-G-C-G-----G--T-TC-G-A-C-----  
-----AA---G-T-C-G-----G-G-T--G--TG--A-AA-CC--T-C-CA-G-G----CT-C-AA-----C-C-T-G-G-A-G---T---C-G-CC-A--C-T-----C--GA-A-A---C-----T--G-T--TG-TG-A-C---T-A-G-A-G-T--C---C-GG----TA-G-G-----G-G-A-G---CA-T-----GG--A--ATT---  
C-C-T-G-GT--GT-A-G-CG-GT--G---G--A-A---TG-C-GC-AG--AT-A-TC--A-G--G-A-G-G-A-AC-A-CC---AG--T--G--GC-GAA-G--G-C--G-----A--T-G-C-T---CTG--G--GC-C-G-----G-T---A-C-T--GA--CG-C-T-G--A-GG--A-G-CG-A--AA-G-C---A-TG--  
GG-G--AG-C-G-AA-----CA--GG      Bacteria(100);Actinobacteria(100);Actinobacteria(100);unclassified(100);unclassified(100);unclassified(100);unclassified(100);unclassified(100);unclassified(100);



|         |                                                                                                                                                                                                                             |   |   |   |   |   |   |   |   |   |   |   |   |   |   |   |    |   |   |   |   |   |   |   |   |   |   |  |
|---------|-----------------------------------------------------------------------------------------------------------------------------------------------------------------------------------------------------------------------------|---|---|---|---|---|---|---|---|---|---|---|---|---|---|---|----|---|---|---|---|---|---|---|---|---|---|--|
| Otu1555 | 0                                                                                                                                                                                                                           | 0 | 0 | 0 | 0 | 0 | 0 | 0 | 0 | 0 | 0 | 0 | 0 | 0 | 0 | 0 | 0  | 0 | 0 | 0 | 0 | 0 | 0 | 0 | 0 | 0 | 0 |  |
|         | 0                                                                                                                                                                                                                           | 0 | 0 | 0 | 0 | 0 | 0 | 0 | 0 | 0 | 0 | 0 | 0 | 0 | 0 | 0 | 0  | 0 | 0 | 0 | 0 | 0 | 0 | 0 | 0 | 0 | 0 |  |
|         | 0                                                                                                                                                                                                                           | 0 | 0 | 0 | 0 | 0 | 0 | 0 | 0 | 0 | 0 | 0 | 0 | 0 | 0 | 0 | 25 | 0 | 0 | 0 | 0 | 0 | 0 | 0 | 0 | 0 | 0 |  |
|         | 0                                                                                                                                                                                                                           | 0 | 0 | 0 | 0 | 0 | 0 | 0 | 0 | 0 | 0 | 0 | 0 | 0 | 0 | 0 | 0  | 0 | 0 | 0 | 0 | 0 | 0 | 0 | 0 |   |   |  |
|         | M02255_77_000000000-ADUT3_1_2113_19415_19303                                                                                                                                                                                |   |   |   |   |   |   |   |   |   |   |   |   |   |   |   |    |   |   |   |   |   |   |   |   |   |   |  |
|         | T---AC--AG-AG-GGT-----GCG-A-G-----C-G-T--T--GT-C-CGG-AA-----TC-A--C-T--GG-GC-----GT-A----AA-GG-GC-GC-----G-TA-G-G-C-G-----G--C-CT-G-G-T----                                                                                 |   |   |   |   |   |   |   |   |   |   |   |   |   |   |   |    |   |   |   |   |   |   |   |   |   |   |  |
|         | -----AA---G-T-C-G-----G-G-G-G--TG--A-AA-CG--C-T-GC-G-G-----CT-C-AA-----C-C-G-C-A-G-C--A-C---T-G--C-C--T--T-----C--GA-G-A--C-----T--G-T--CA--G-G-C---T-T-G-A-G-C--A---C-GG---TA-G-A-----G-G-C-T--GG-T-----GG--A--ATT----     |   |   |   |   |   |   |   |   |   |   |   |   |   |   |   |    |   |   |   |   |   |   |   |   |   |   |  |
|         | C-C-C-G-GT--GT-A-G-CG-GT--G---G--A-A---TG-C-GT-AG--AG-A-TC--G-G--G-A-A-G-A-AC-A-TC--GG--T--G--GC-GAA-G--G-C--G-----G--C-C-A-G--CTG--G--GC-CG-----T-T---G-C-T--GA--CG-C-T-G--A-GG--C-G-CG-A--CA-G-C---G-TG--                 |   |   |   |   |   |   |   |   |   |   |   |   |   |   |   |    |   |   |   |   |   |   |   |   |   |   |  |
|         | GG-G--AG-C-A-AA-----CA--GG Bacteria(100);unclassified(100);unclassified(100);unclassified(100);unclassified(100);unclassified(100);unclassified(100);unclassified(100);unclassified(100);                                   |   |   |   |   |   |   |   |   |   |   |   |   |   |   |   |    |   |   |   |   |   |   |   |   |   |   |  |
| Otu1556 | 0                                                                                                                                                                                                                           | 0 | 0 | 0 | 0 | 0 | 0 | 0 | 0 | 0 | 0 | 0 | 0 | 0 | 0 | 0 | 0  | 0 | 0 | 0 | 0 | 0 | 0 | 0 | 0 | 0 | 0 |  |
|         | 0                                                                                                                                                                                                                           | 0 | 0 | 0 | 0 | 0 | 0 | 0 | 0 | 0 | 0 | 0 | 0 | 0 | 0 | 0 | 0  | 0 | 0 | 0 | 0 | 0 | 0 | 0 | 0 | 0 | 0 |  |
|         | 0                                                                                                                                                                                                                           | 0 | 0 | 0 | 0 | 0 | 0 | 0 | 0 | 0 | 0 | 0 | 0 | 0 | 0 | 0 | 16 | 0 | 0 | 0 | 0 | 0 | 0 | 0 | 0 | 0 | 0 |  |
|         | 0                                                                                                                                                                                                                           | 0 | 0 | 0 | 0 | 0 | 0 | 0 | 0 | 0 | 0 | 0 | 0 | 0 | 0 | 0 | 0  | 0 | 0 | 0 | 0 | 0 | 0 | 0 | 0 | 0 | 0 |  |
|         | M02255_77_000000000-ADUT3_1_2113_15588_17173                                                                                                                                                                                |   |   |   |   |   |   |   |   |   |   |   |   |   |   |   |    |   |   |   |   |   |   |   |   |   |   |  |
|         | T---AC--GT-AG-GGG-----GCG-A-G-----C-G-T--T--GT-C-CGG-AT-----TT-A--T-T--GG-GC-----GT-A----AA-GA-GC-TC-----G-TA-G-G-C-G-----G--T-TC-G-G-T-----                                                                                |   |   |   |   |   |   |   |   |   |   |   |   |   |   |   |    |   |   |   |   |   |   |   |   |   |   |  |
|         | -----AA---G-T-C-G-----G-A-T-G--TG--A-AA-TC--T-C-CA-C-G-----CT-C-AA-----C-G-T-G-G-A-G--G-----G-G--CCA--T--T-----C--GA-T-A--C-----T--G-C--TG-TG-A-C---T-C-G-A-G-T--C---C-GG---TA-G-G-----G-G--AG--TG-T-----GG--A--ATTC---     |   |   |   |   |   |   |   |   |   |   |   |   |   |   |   |    |   |   |   |   |   |   |   |   |   |   |  |
|         | C-C--G-GT--GT-A-G-CG-GT--G---A--A-A---TG-C-GC-AG--AG-A-TC--G-G--G-A-G-G-A-AC-A-CC--CG--T--A--GC-GAA-G--G-C--G-----G--C-A-C-T--CTGG---GC-C-G-----G-T---A-C-T--GA--CG-C-T-G--A-GG--A-G-CG-A--AA-G-C---G-TG--                  |   |   |   |   |   |   |   |   |   |   |   |   |   |   |   |    |   |   |   |   |   |   |   |   |   |   |  |
|         | GG-G--AG-C-A-AA-----CA--GG Bacteria(100);Actinobacteria(100);Actinobacteria(100);Acidimicrobiae(100);Acidimicrobiales(100);Acidimicrobinaeae(100);uncultured(100);unclassified(100);unclassified(100);                      |   |   |   |   |   |   |   |   |   |   |   |   |   |   |   |    |   |   |   |   |   |   |   |   |   |   |  |
| Otu1557 | 0                                                                                                                                                                                                                           | 0 | 0 | 0 | 0 | 0 | 0 | 0 | 0 | 0 | 0 | 0 | 0 | 0 | 0 | 0 | 0  | 0 | 0 | 0 | 0 | 0 | 0 | 0 | 0 | 0 | 0 |  |
|         | 0                                                                                                                                                                                                                           | 0 | 0 | 0 | 0 | 0 | 0 | 0 | 0 | 0 | 0 | 0 | 0 | 0 | 0 | 0 | 0  | 0 | 0 | 0 | 0 | 0 | 0 | 0 | 0 | 0 | 0 |  |
|         | 0                                                                                                                                                                                                                           | 0 | 0 | 0 | 0 | 0 | 0 | 0 | 0 | 0 | 0 | 0 | 0 | 0 | 0 | 0 | 26 | 0 | 0 | 0 | 0 | 0 | 0 | 0 | 0 | 0 | 0 |  |
|         | 0                                                                                                                                                                                                                           | 0 | 0 | 0 | 0 | 0 | 0 | 0 | 0 | 0 | 0 | 0 | 0 | 0 | 0 | 0 | 0  | 0 | 0 | 0 | 0 | 0 | 0 | 0 | 0 | 0 | 0 |  |
|         | M02255_77_000000000-ADUT3_1_1118_11490_14483                                                                                                                                                                                |   |   |   |   |   |   |   |   |   |   |   |   |   |   |   |    |   |   |   |   |   |   |   |   |   |   |  |
|         | T---AC--GA-AG-GGG-----GCT-A-G-----C-G-T--T--GT-T-CGG-AA-----TT-A--C-T--GG-GC-----GT-A----AA-GG-GC-GC-----G-TA-G-G-C-G-----G--C-GC-A-T-T-----                                                                                |   |   |   |   |   |   |   |   |   |   |   |   |   |   |   |    |   |   |   |   |   |   |   |   |   |   |  |
|         | -----AA---G-T-C-A-----G-G-T--G--TG--A-AA-GC--C-C-TG-G-G-----CT-C-AA-----C-C-C-A-G-G-A--A-T---T-G--C-A--C--T-----T--GA-T-A--C-----T--G-A--TG--T-G-C---T-T-G-A-A-T--C---C-GG---AA-G-A-----G-G-A-T--GA-C-----GG--A--ATT----    |   |   |   |   |   |   |   |   |   |   |   |   |   |   |   |    |   |   |   |   |   |   |   |   |   |   |  |
|         | C-C-C-A-GT--GT-A-G-AG-GT--G---A--A-A---TT-C-AT-TG--AT-A-TT--G-G--G-A-A-G-A-AC-A-CC--AG--T--G--GC-GAA-G--G-C--G-----G--T-C-A-T--CTG--G--TC-C-G-----G-T---A-T-T--GA--CG-C-T-G--A-GG--C-G-CG-A--AA-G-C---G-TG--GG-             |   |   |   |   |   |   |   |   |   |   |   |   |   |   |   |    |   |   |   |   |   |   |   |   |   |   |  |
|         | G--AG-C-A-AA-----CA--GG Bacteria(100);Proteobacteria(100);Alphaproteobacteria(100);unclassified(100);unclassified(100);unclassified(100);unclassified(100);unclassified(100);unclassified(100);                             |   |   |   |   |   |   |   |   |   |   |   |   |   |   |   |    |   |   |   |   |   |   |   |   |   |   |  |
| Otu1558 | 0                                                                                                                                                                                                                           | 0 | 0 | 0 | 0 | 0 | 0 | 0 | 0 | 0 | 0 | 0 | 0 | 0 | 0 | 0 | 0  | 0 | 0 | 0 | 0 | 0 | 0 | 0 | 0 | 0 | 0 |  |
|         | 0                                                                                                                                                                                                                           | 0 | 0 | 0 | 0 | 0 | 0 | 0 | 0 | 0 | 0 | 0 | 0 | 0 | 0 | 0 | 0  | 0 | 0 | 0 | 0 | 0 | 0 | 0 | 0 | 0 | 0 |  |
|         | 0                                                                                                                                                                                                                           | 0 | 0 | 0 | 0 | 0 | 0 | 0 | 0 | 0 | 0 | 0 | 0 | 0 | 0 | 0 | 27 | 0 | 0 | 0 | 0 | 0 | 0 | 0 | 0 | 0 | 0 |  |
|         | 0                                                                                                                                                                                                                           | 0 | 0 | 0 | 0 | 0 | 0 | 0 | 0 | 0 | 0 | 0 | 0 | 0 | 0 | 0 | 0  | 0 | 0 | 0 | 0 | 0 | 0 | 0 | 0 | 0 | 0 |  |
|         | M02255_77_000000000-ADUT3_1_1115_20850_23281                                                                                                                                                                                |   |   |   |   |   |   |   |   |   |   |   |   |   |   |   |    |   |   |   |   |   |   |   |   |   |   |  |
|         | T---AC--GA-AG-GGG-----GCT-A-G-----C-G-T--T--GT-T-CGG-AT-----TT-A--C-T--GG-GC-----GT-A----AA-GC-GC-AT-----G-TA-G-G-C-G-----G--G-TC-G-T-T-----                                                                                |   |   |   |   |   |   |   |   |   |   |   |   |   |   |   |    |   |   |   |   |   |   |   |   |   |   |  |
|         | -----AA---G-T-T-A-----G-G-G--G--TG--A-AA-TC--C-C-AA-G-G-----CT-C-AA-----C-C-T-T-G-G-A--A-C---T-G--C-C--T--C-----T--AA-A-A--C-----T--G-G--CG--A-C-C---T-G-G-A-G-C--A---A-GA---TA-G-A-----G-G-C-G---AG-T-----GG--A--ATT----C- |   |   |   |   |   |   |   |   |   |   |   |   |   |   |   |    |   |   |   |   |   |   |   |   |   |   |  |
|         | C-G-A-GT--GT-A-G-AG-GT--G---A--A-A---TT-C-GT-AG--AT-A-TT--C-G--G-A-G-G-A-AC-A-CC--AG--T--G--GC-GAA-G--G-C--G-----A--C-T-C-G---CTG--G--AT-C-T-----T-T---G-C-T--GA--CG-C-T-G--A-GA--T-G-CG-A--AA-G-C---G-TG--GG-G-            |   |   |   |   |   |   |   |   |   |   |   |   |   |   |   |    |   |   |   |   |   |   |   |   |   |   |  |
|         | -AG-C-A-AA-----CA--GG Bacteria(100);Proteobacteria(100);Alphaproteobacteria(100);unclassified(100);unclassified(100);unclassified(100);unclassified(100);unclassified(100);unclassified(100);                               |   |   |   |   |   |   |   |   |   |   |   |   |   |   |   |    |   |   |   |   |   |   |   |   |   |   |  |
| Otu1559 | 0                                                                                                                                                                                                                           | 0 | 0 | 0 | 0 | 0 | 0 | 0 | 0 | 0 | 0 | 0 | 0 | 0 | 0 | 0 | 0  | 0 | 0 | 0 | 0 | 0 | 0 | 0 | 0 | 0 | 0 |  |
|         | 0                                                                                                                                                                                                                           | 0 | 0 | 0 | 0 | 0 | 0 | 0 | 0 | 0 | 0 | 0 | 0 | 0 | 0 | 0 | 0  | 0 | 0 | 0 | 0 | 0 | 0 | 0 | 0 | 0 | 0 |  |
|         | 0                                                                                                                                                                                                                           | 0 | 0 | 0 | 0 | 0 | 0 | 0 | 0 | 0 | 0 | 0 | 0 | 0 | 0 | 0 | 16 | 0 | 0 | 0 | 0 | 0 | 0 | 0 | 0 | 0 | 0 |  |
|         | 0                                                                                                                                                                                                                           | 0 | 0 | 0 | 0 | 0 | 0 | 0 | 0 | 0 | 0 | 0 | 0 | 0 | 0 | 0 | 0  | 0 | 0 | 0 | 0 | 0 | 0 | 0 | 0 | 0 | 0 |  |
|         | M02255_77_000000000-ADUT3_1_1112_22408_18041                                                                                                                                                                                |   |   |   |   |   |   |   |   |   |   |   |   |   |   |   |    |   |   |   |   |   |   |   |   |   |   |  |
|         | A----AC---GT-AG-GAG-----GCG-A-G-----C--G--T--T--AT-C-CGG-AT-----TT-A--C-T--GG-GT-----GT-A----AA-GC-GC-GT-----G-CA-G-G-C-G-----G--T-TC-G-C-T-----                                                                            |   |   |   |   |   |   |   |   |   |   |   |   |   |   |   |    |   |   |   |   |   |   |   |   |   |   |  |
|         | -----AA---G-T-T-G-----G-A-T-G--TG--A-AA-GC--T-C-CC-G-G-----CT-C-AA-----C-T-G-G-G-A-G--A-G---G-T--C-G--T--A-----C--AA-G-A--C-----T--G-G--CG--G-A-C---T-G-G-A-G-T--G---T-GG---TA-G-G-----G-G-A-A--GG-T-----GG--A--ATT----     |   |   |   |   |   |   |   |   |   |   |   |   |   |   |   |    |   |   |   |   |   |   |   |   |   |   |  |
|         | C-C-G-G-GT--GT-A-G-TG-GT--G---A--A-A---TG-C-GT-AG--AT-A-TC--C-G--G-A-G-G-A-AC-A-CC--AG--T--G--GC-GAA-A--G-C--G-----G--C-C-T-T--CTA--G--AC-C-A-----C-A---A-C-T--GA--CG-C-T-C--A-GA--C-G-CG-A--AA-G-C---T-AG--GG-             |   |   |   |   |   |   |   |   |   |   |   |   |   |   |   |    |   |   |   |   |   |   |   |   |   |   |  |
|         | T--AG-C-A-AA-----CG--GG Bacteria(100);Chloroflexi(100);Anaerolineae(100);Anaerolineales(100);Anaerolineaceae(100);unclassified(100);unclassified(100);unclassified(100);unclassified(100);                                  |   |   |   |   |   |   |   |   |   |   |   |   |   |   |   |    |   |   |   |   |   |   |   |   |   |   |  |



[illegible]



[illegible]



|         |                                                                                                                                                                                                                                                                                                                                                                                                                                                                                                                                                                                                                                                                                                                                                                                                                |   |   |   |    |   |   |   |   |    |   |   |   |   |   |   |   |    |   |   |   |   |   |   |   |   |   |  |
|---------|----------------------------------------------------------------------------------------------------------------------------------------------------------------------------------------------------------------------------------------------------------------------------------------------------------------------------------------------------------------------------------------------------------------------------------------------------------------------------------------------------------------------------------------------------------------------------------------------------------------------------------------------------------------------------------------------------------------------------------------------------------------------------------------------------------------|---|---|---|----|---|---|---|---|----|---|---|---|---|---|---|---|----|---|---|---|---|---|---|---|---|---|--|
| Otu1570 | 0                                                                                                                                                                                                                                                                                                                                                                                                                                                                                                                                                                                                                                                                                                                                                                                                              | 0 | 0 | 0 | 0  | 0 | 0 | 0 | 0 | 0  | 0 | 0 | 0 | 0 | 0 | 0 | 0 | 0  | 0 | 0 | 0 | 0 | 0 | 0 | 0 | 0 | 0 |  |
|         | 0                                                                                                                                                                                                                                                                                                                                                                                                                                                                                                                                                                                                                                                                                                                                                                                                              | 0 | 0 | 0 | 0  | 0 | 0 | 0 | 0 | 0  | 0 | 0 | 0 | 0 | 0 | 0 | 0 | 0  | 0 | 0 | 0 | 0 | 0 | 0 | 0 | 0 | 0 |  |
|         | 0                                                                                                                                                                                                                                                                                                                                                                                                                                                                                                                                                                                                                                                                                                                                                                                                              | 0 | 0 | 0 | 0  | 0 | 0 | 0 | 0 | 0  | 4 | 0 | 0 | 4 | 1 | 0 | 0 | 0  | 0 | 0 | 0 | 0 | 0 | 0 | 0 | 0 | 0 |  |
|         | 0                                                                                                                                                                                                                                                                                                                                                                                                                                                                                                                                                                                                                                                                                                                                                                                                              | 0 | 0 | 0 | 65 | 0 | 0 | 0 | 0 | 23 | 0 | 0 | 0 | 0 | 0 | 0 | 0 | 0  | 0 | 0 | 0 | 0 | 0 | 0 | 0 | 0 | 0 |  |
|         | M02255_77_000000000-ADUT3_1_2119_20448_10437 T---AC--GT-AG-GTG-----GCA-A-G-----C-G--T--T--AT-C-CGG-AA-----TT-A--C-T-GG-GT-----GT--A----AA-GG-GC-GC-----G-TA-G-G-C-G-----G--G-CG-T-G-C-----AA---G-T-T-A-----G-A-T--G--TG--A-AA-AC--C-T-GG-G-G----CT-C-AA-----C-T-C-C-A-G-A--C-T---T-G--C-A--T--C-----T-AA-A-A--C-----T-G-C--AC--A-T-C---T-T-G-A-G-T--G--T-CA----GA-G-G-----G-G-A-A--AG-T-----GG--A--ATT---C-C-T-A-GT--GG-A-G-CG-GT--A--A-A-A--TG-C-GT-AG--AG-A-TT--A-G--G-A-G-G-A-AC-A-TC--GG--T--G--GC-GAA-G--G-C-G-----A-C-T-T-T--CTG--G--CT-G-A-----C-A--A-C-T--GA--CG-C-T-G--A-GG--C-G-CG-A-AA-G-C--G-TG--GG-T--AG-C-G-AA-----CA--GG Bacteria(100);unclassified(100);unclassified(100);unclassified(100);unclassified(100);unclassified(100);unclassified(100);unclassified(100);unclassified(100);         |   |   |   |    |   |   |   |   |    |   |   |   |   |   |   |   |    |   |   |   |   |   |   |   |   |   |  |
| Otu1571 | 0                                                                                                                                                                                                                                                                                                                                                                                                                                                                                                                                                                                                                                                                                                                                                                                                              | 0 | 0 | 0 | 0  | 0 | 0 | 0 | 0 | 0  | 0 | 0 | 0 | 0 | 0 | 0 | 0 | 0  | 0 | 0 | 0 | 0 | 0 | 0 | 0 | 0 | 0 |  |
|         | 0                                                                                                                                                                                                                                                                                                                                                                                                                                                                                                                                                                                                                                                                                                                                                                                                              | 0 | 0 | 0 | 0  | 0 | 0 | 0 | 0 | 0  | 0 | 0 | 0 | 0 | 0 | 0 | 0 | 0  | 0 | 0 | 0 | 0 | 0 | 0 | 0 | 0 | 0 |  |
|         | 0                                                                                                                                                                                                                                                                                                                                                                                                                                                                                                                                                                                                                                                                                                                                                                                                              | 0 | 0 | 0 | 0  | 0 | 0 | 5 | 0 | 0  | 0 | 0 | 0 | 0 | 0 | 0 | 0 | 90 | 0 | 0 | 0 | 0 | 0 | 0 | 0 | 0 | 0 |  |
|         | 0                                                                                                                                                                                                                                                                                                                                                                                                                                                                                                                                                                                                                                                                                                                                                                                                              | 0 | 0 | 0 | 0  | 0 | 0 | 0 | 0 | 0  | 0 | 0 | 0 | 0 | 0 | 0 | 0 | 0  | 0 | 0 | 0 | 0 | 0 | 0 | 0 | 0 | 0 |  |
|         | M02255_77_000000000-ADUT3_1_2117_20635_12350 T---AC--GA-AG-GGG-----GCT-A-G-----C-G--T--T--GT-T-CGG-AA-----TT-A--C-T-GG-GC-----GT--A----AA-GC-GC-AC-----G-TA-G-G-C-G-----G--A-TT-G-T-T-----AA---G-T-G-A-----G-G-G--G--TG--A-AA-TC--C-C-GG-G-G----CT-C-AA-----C-C-C-C-G-G-A--A-C---T-G--C-C--T--C-----T-CA-T-A--C-----T-G-G--CA--A-T-C---T-C-G-A-G-T--T--T-GG---GA-G-A-----G-G-T-G--AG-T-----GG--A--ATT---C-C-G-A-GT--GT-A-G-AG-GT--G--A-A-A--TT-C-GT-AG--AT-A-TT--C-G--G-A-G-G-A-AC-A-CC--AG--T--G--GC-GAA-G--G-C-G-----G--C-T-C-A--CTG--G--CC-C-A-----A-A--A-C-T--GA--CG-C-T-G--A-GG--T-G-CG-A-AA-G-C--G-TG--GG-G--AG-C-A-AA-----CA--GG Bacteria(100);Proteobacteria(100);Alphaproteobacteria(100);Rhizobiales(100);unclassified(100);unclassified(100);unclassified(100);unclassified(100);unclassified(100); |   |   |   |    |   |   |   |   |    |   |   |   |   |   |   |   |    |   |   |   |   |   |   |   |   |   |  |
| Otu1572 | 0                                                                                                                                                                                                                                                                                                                                                                                                                                                                                                                                                                                                                                                                                                                                                                                                              | 0 | 0 | 0 | 0  | 0 | 0 | 0 | 0 | 0  | 0 | 0 | 0 | 0 | 0 | 0 | 0 | 0  | 0 | 0 | 0 | 0 | 0 | 0 | 0 | 0 | 0 |  |
|         | 0                                                                                                                                                                                                                                                                                                                                                                                                                                                                                                                                                                                                                                                                                                                                                                                                              | 0 | 0 | 0 | 0  | 0 | 0 | 0 | 0 | 0  | 0 | 0 | 0 | 0 | 0 | 0 | 0 | 0  | 0 | 0 | 0 | 0 | 0 | 0 | 0 | 0 | 0 |  |
|         | 0                                                                                                                                                                                                                                                                                                                                                                                                                                                                                                                                                                                                                                                                                                                                                                                                              | 0 | 0 | 0 | 0  | 0 | 0 | 0 | 0 | 0  | 0 | 4 | 0 | 0 | 0 | 0 | 0 | 0  | 0 | 0 | 0 | 0 | 0 | 0 | 0 | 0 | 0 |  |
|         | 0                                                                                                                                                                                                                                                                                                                                                                                                                                                                                                                                                                                                                                                                                                                                                                                                              | 0 | 0 | 0 | 0  | 0 | 0 | 0 | 0 | 0  | 0 | 0 | 0 | 0 | 0 | 0 | 0 | 0  | 0 | 0 | 0 | 0 | 0 | 0 | 0 | 0 | 0 |  |
|         | M02255_77_000000000-ADUT3_1_1113_14241_13422 T---AC--GT-AG-GGG-----GCG-A-G-----C-G--T--T--GT-C-CGG-AT-----TT-A--T-T-GG-GC-----GT--A----AA-GC-GC-CC-----G-CA-G-G-C-G-----G--T-CG-C-G-T-----CA---G-T-T-T-----G-G-G--G--TG--A-CA-GC--T-C-CT-G-G----CT-T-AA-----C-C-G-G-G-A-G--A-G---G-A--C-C--T--C-----G-AA-G-A--C-----G--G-C--GT--G-A-C---T-T-G-A-G-G--G--C-CA---GA-G-A-----G-G-G-A--CA-T-----GG--A--ACT---C-C-G-G-GT--GG-A-G-TG-GT--G--A-A-A--TG-C-GT-AG--AG-A-TC--C-G--G-A-A-G-A-AC-A-CC--AA--A--G--GC-GAA-G--G-C-A-----G--T-G-T-C--CTG--G--CT-G-G-----C-A--C-C-T--GA--CG-C-T-G--A-GG--G-G-CG-A-AA-G-C--G-AG--GG-G--AG-C-G-AA-----CG--GG Bacteria(100);unclassified(100);unclassified(100);unclassified(100);unclassified(100);unclassified(100);unclassified(100);unclassified(100);unclassified(100);        |   |   |   |    |   |   |   |   |    |   |   |   |   |   |   |   |    |   |   |   |   |   |   |   |   |   |  |
| Otu1573 | 0                                                                                                                                                                                                                                                                                                                                                                                                                                                                                                                                                                                                                                                                                                                                                                                                              | 0 | 0 | 0 | 0  | 0 | 0 | 0 | 0 | 0  | 0 | 0 | 0 | 0 | 0 | 0 | 0 | 0  | 0 | 0 | 0 | 0 | 0 | 0 | 0 | 0 | 0 |  |
|         | 0                                                                                                                                                                                                                                                                                                                                                                                                                                                                                                                                                                                                                                                                                                                                                                                                              | 0 | 0 | 0 | 0  | 0 | 0 | 0 | 0 | 0  | 0 | 0 | 0 | 0 | 0 | 0 | 0 | 0  | 0 | 0 | 0 | 0 | 0 | 0 | 0 | 0 | 0 |  |
|         | 0                                                                                                                                                                                                                                                                                                                                                                                                                                                                                                                                                                                                                                                                                                                                                                                                              | 0 | 0 | 0 | 0  | 0 | 0 | 0 | 0 | 0  | 0 | 4 | 0 | 0 | 0 | 0 | 0 | 0  | 0 | 0 | 0 | 0 | 0 | 0 | 0 | 0 | 0 |  |
|         | 0                                                                                                                                                                                                                                                                                                                                                                                                                                                                                                                                                                                                                                                                                                                                                                                                              | 0 | 0 | 0 | 0  | 0 | 0 | 0 | 0 | 0  | 0 | 0 | 0 | 0 | 0 | 0 | 0 | 0  | 0 | 0 | 0 | 0 | 0 | 0 | 0 | 0 | 0 |  |
|         | M02255_77_000000000-ADUT3_1_1113_13472_22947 T---AC--GA-AT-GGA-----GCG-A-G-----C-G--T--T--GT-T-CGG-AA-----TC-A--C-T-GG-GC-----GT--A----AA-GG-GT-GC-----G-CA-G-G                                                                                                                                                                                                                                                                                                                                                                                                                                                                                                                                                                                                                                                |   |   |   |    |   |   |   |   |    |   |   |   |   |   |   |   |    |   |   |   |   |   |   |   |   |   |  |



Otu1575      0      0      0      0      0      0      0      0      0      0      0      0      0      0      0      0      0      0      0      0      0      0      0      0      0      0      0  
0      0      0      0      0      0      0      0      0      0      0      0      0      0      0      0      0      0      0      0      0      0      0      0      0      0      0      0  
0      0      0      0      0      0      0      0      0      0      0      0      6      0      0      0      0      0      0      0      0      0      0      0      0      0      0      0  
0      0      0      0      0      0      0      0      0      0      0      0      0      0      0      0      0      0      0      0      0      0      0      0      0      0      0      0  
M02255\_77\_000000000-ADUT3\_1\_1101\_9189\_19327 T---AC---GG-AG-GAT-----GCA-A-G-----C--G--T---T--AT-C-CGG-AA-----TG-A-T-T-GG-GC-----GT--A---AA-GG-GT-TC-----G-CA-G-G-T-G-----G--T-AG-T-G-A-----  
AA---G-T-T-T-----G-C-T--G--TT--A-AA-AG--T-C-GG-G-G----CT-C-AA-----C-C-C-C-G-A-A--C-C---G-G--C-G--G--T-----G--AA-A-A--C-----T--A-C-AC--A-A-C---T-A-G-A-G-T--G---C-GG----TA-G-G-----G-G-C-A--GA-G-----GG--A--ATT---C-C-T-  
G-GT--GT-A-G-CG-GT--G---A--A-A---TG-C-GT-AG--AG-C-TC--A-G--G-A-A-G-A-AC-A-CC---GG--T--G--GC-GAA-A--G-C--G-----C--T-C-T-G---CTA--G--AC-C-T-----G-C---A-C-T--GA--CA-C-T-G--A-GG--G-A-CG-A--AA-G-C---T-AG--GG-G--  
AG-C-G-AA-----TG--GG      Bacteria(100);Cyanobacteria(100);unclassified(100);unclassified(100);unclassified(100);unclassified(100);unclassified(100);unclassified(100);unclassified(100);

Otu1576      0      0      0      0      0      0      0      0      0      0      0      0      0      0      0      0      0      0      0      0      0      0      0      0      0      0      0  
0      0      0      0      0      0      0      0      0      0      0      0      0      0      0      0      0      0      0      0      0      0      0      0      0      0      0      0  
0      0      0      0      0      0      0      0      0      0      0      0      0      6      0      0      0      0      0      0      0      0      0      0      0      0      0      0  
0      0      0      0      0      0      0      0      0      0      0      0      0      0      0      0      0      0      0      0      0      0      0      0      0      0      0      0  
M02255\_77\_000000000-ADUT3\_1\_2103\_19181\_23516      T---AC---GA-AG-GGG-----GCT-A-G-----C--G--T---T--GT-T-CGG-AA-----TT-A--C-T--GG-GC-----GT--A---AA-GC-GC-AC-----G-TA-G-G-C-G-----G--A-TT-G-A-T-----  
-----CA---G-T-C-A-----G-G-G--G--TG--A-AA-TC--C-C-AG-A-G----CT-C-AA-----C-T-C-T-G-G-A--A-C---T-G--C-C---T--T-----T--GA-T-A--C-----T--G-T--CA--A-T-C---T-A-G-A-G-T--C--C-AG----AA-G-A-----G-G-T-G---AG-T-----GG--A--ATT---C-  
C-G-A-GT--GT-A-G-AG-GT--G---A--A-A---TT-C-GT-AG--AT-A-TT--C-G--G-A-G-G-A-AC-A-CC---AG--T--G--GC-GAA-G--G-C--G-----G--C-T-C-A---CTG--G--TC-T-G-----G-T---A-C-T--GA--CG-C-T-G--A-GG--T-G-CG-A--AA-G-C---G-TG--GG-  
G--AG-C-A-AA-----CA--GG      Bacteria(100);Proteobacteria(100);Alphaproteobacteria(100);Rhizobiales(100);Rhizobiaceae(100);unclassified(100);unclassified(100);unclassified(100);unclassified(100);

Otu1577      0      0      0      0      0      0      0      0      0      0      0      0      0      0      0      0      0      0      0      0      0      0      0      0      0      0      0  
0      0      0      0      0      0      0      0      0      0      0      0      0      0      0      0      0      0      0      0      0      0      0      0      0      0      0      0  
0      0      0      0      0      0      0      0      0      0      0      0      0      6      0      0      0      0      0      0      0      0      0      0      0      0      0      0  
0      0      0      0      0      0      0      0      0      0      0      0      0      0      0      0      0      0      0      0      0      0      0      0      0      0      0      0  
M02255\_77\_000000000-ADUT3\_1\_1104\_26982\_16185      T---AC---GT-AG-GAC-----CCA-A-G-----C--G--T---T--AT-C-CGG-AG-----TG-A--C-T--GG-GC-----GT--A---AA-GA-GTTGC-----G-TA-G-G-C-G-----G--T-GA-T-T-T-----  
-----AA---G-C-A-G-----A-T-A--G--TG--A-AA-GC--A-T-GT-G-G----CT-C-AA-----C-C-A-T-TAT-G--T-C---T-A--T-T--A--T-----C--TG-A-A--C-----T--G-A--AT--C-A-C---T-T-G-A-G-A--A--T-GG----TA-G-A-----G-G-T-A---GC-T-----GG--A--ATT---T-  
C-T-A-GT--GT-A-G-GA-GT--G---A--A-A---TC-C-GT-AG--AT-A-TT--A-G--A-A-G-G-A-AC-A-CC---AA--T--G--GC-GTA-G--G-C--A-----G--G-C-T-A---CTG--G--AC-C-A-----T-T---T-C-T--GA--CG-C-T-G--A-GG--C-A-CG-A--AA-G-C---G-TG--GG-G--  
AG-C-G-AA-----CC--GG      Bacteria(100);unclassified(100);unclassified(100);unclassified(100);unclassified(100);unclassified(100);unclassified(100);unclassified(100);unclassified(100);

Otu1578      0      0      0      0      0      0      0      0      0      0      0      0      0      0      0      0      0      0      0      0      0      0      0      0      0      0      0  
0      0      0      0      0      0      0      0      0      0      0      0      0      0      0      0      0      0      0      0      0      0      0      0      0      0      0      0  
0      0      0      0      0      0      0      0      0      0      0      0      0      2      0      0      0      13      0      0      0      0      0      0      0      0      0      0  
0      0      0      0      0      0      0      0      0      0      0      0      0      0      0      0      0      0      0      0      0      0      0      0      0      0      0      0  
M02255\_77\_000000000-ADUT3\_1\_1117\_13063\_16755      T---AC---GT-AG-GGG-----CCG-A-G-----C--G--T---T--GT-C-CGG-AG-----TT-A--C-T--GG-GC-----GT--A---AA-GC-GT-GC-----G-CA-G-G-C-G-----G--C-GC-G-T-T-----  
-----CT---G-C-C-C-----G-G-C--G--TG--A-AA-GC--C-C-CC-G-G----CT-C-AA-----C-C-G-G-G-G-A--G-G---G-T--C-G---T--C-----G--GG-G-A--C-----G--G-G--CG--C-G-C---T-T-G-A-G-G--G---T-AT-----CA-G-G-----G-G-C-T---GG-T-----GG--A--ATT---  
---CCC-G-GT--GT-A-G-TG-GT--G---A--A-A---TG-C-GT-AG--AG-A-TC--G-G--G-A-G-G-A-AC-A-CC---TG--T--G--GC-GAA-G--G-C--G-----G--C-C-A-G---CTG--G--GA-T-A-----C-A---C-C-T--GA--CG-C-T-G--A-GG--C-A-CG-A--AG-G-C---G-TG--GG-G--  
GG-G--AG-C-G-AA-----CG--GG Bacteria(100);Chloroflexi(100);Thermomicrobia(100);JG30-KF-CM45(100);unclassified(100);unclassified(100);unclassified(100);unclassified(100);unclassified(100);

Otu1579      0      0      0      0      0      0      0      0      0      0      0      0      0      0      0      0      0      0      0      0      0      0      0      0      0      0      0  
0      0      0      0      0      0      0      0      0      0      0      0      0      0      0      0      0      0      0      0      0      0      0      0      0      0      0      0  
0      0      0      0      0      1      0      0      0      0      0      0      0      0      1      0      0      0      0      0      0      0      0      0      0      0      0      0  
0      0      0      0      0      6      0      0      0      0      0      8      0      0      0      0      0      0      0      0      0      0      0      0      0      0      0      0  
M02255\_76\_000000000-ADUNE\_1\_2106\_25950\_15086      C---GT---GC-CA-GCA-----GCC-G-C-----G--G--T---A--AT-A-CGT-AG-----GG-G--G-C--TA-GC-----GT--T---AT-CC-G--GA-----T-TT-A-C-T-G-----G--G-CT-G-T-A-----  
---AA---G-T-C-G-----G-T-G--C--GT--A-AA-GG--C-T-AC-G-G----CT-C-AA-----C-C-G-T-A-G-T--T-----A-G--C-C---T--C-----C--GA-A-A--C-----T--G-G--AA--G-A-C---T-T-G-A-G-T--G---C-AG----GA-G-A-----G-G-A-A--AG-T-----GG--A--ATT---C-  
C-C-A-GT--GT-A-G-CG-GT--G---A--A-A---TG-C-GT-AG--AT-A-TT--G-G--G-A-G-G-A-AC-A-CC---AG--T--A--GC-GAA-G--G-C--G-----G--C-T-T-T---CTG--G--AC-T-G-----C-A---A-C-T--GA--CA-C-T-G--A-GG--C-A-CG-A--AA-G-C---G-TG--GG-T-  
-AG-C-A-AA-----CA--GG      Bacteria(100);Firmicutes(100);Clostridia(100);Clostridiales(100);Peptostreptococcaceae(100);Peptostreptococcus(100);unclassified(100);unclassified(100);unclassified(100);



|         |                                                                                                                                                                                                                           |   |   |   |    |   |   |   |    |   |   |   |   |   |    |   |   |   |   |   |   |   |   |   |   |   |   |  |
|---------|---------------------------------------------------------------------------------------------------------------------------------------------------------------------------------------------------------------------------|---|---|---|----|---|---|---|----|---|---|---|---|---|----|---|---|---|---|---|---|---|---|---|---|---|---|--|
| Otu1580 | 0                                                                                                                                                                                                                         | 0 | 0 | 0 | 0  | 0 | 0 | 0 | 0  | 0 | 0 | 0 | 0 | 0 | 0  | 0 | 0 | 0 | 0 | 0 | 0 | 0 | 0 | 0 | 0 | 0 | 0 |  |
|         | 0                                                                                                                                                                                                                         | 0 | 0 | 0 | 0  | 0 | 0 | 0 | 0  | 0 | 0 | 0 | 0 | 0 | 0  | 0 | 0 | 0 | 0 | 0 | 0 | 0 | 0 | 0 | 0 | 0 | 0 |  |
|         | 0                                                                                                                                                                                                                         | 0 | 0 | 1 | 0  | 0 | 0 | 0 | 0  | 0 | 0 | 0 | 0 | 0 | 0  | 0 | 0 | 0 | 0 | 0 | 0 | 0 | 0 | 0 | 0 | 0 | 0 |  |
|         | 0                                                                                                                                                                                                                         | 0 | 0 | 7 | 0  | 0 | 0 | 0 | 0  | 0 | 0 | 0 | 0 | 0 | 0  | 0 | 0 | 0 | 0 | 0 | 0 | 0 | 0 | 0 | 0 | 0 | 0 |  |
|         | M02255_76_000000000-ADUNE_1_1118_29031_16527 T---AC--AG-AC-GGT-----GCG-A-G-----C-G-T--T--AT-T-CAG-CA-----TA-A-A-T--GG-GT-----GT--A---AA-GG-GT-AT-----G-TA-----G-T-TT----T-----                                            |   |   |   |    |   |   |   |    |   |   |   |   |   |    |   |   |   |   |   |   |   |   |   |   |   |   |  |
|         | AA---G-C-T-----A-A-A--T--AG--A-AA-TG--C-T-AG-G-C---GT-A-AA-----T-C-T-T-A-G-C-A-G---A-T-A-T--T-T-----T-AT-T-A--C-----T-T-A-CTA-G-A-C---T-T-G-A-G-T-A--T-AA---TT-G-G-----T-G-T-A--AA-A-----GG--A--ATT---T-C-T-A-            |   |   |   |    |   |   |   |    |   |   |   |   |   |    |   |   |   |   |   |   |   |   |   |   |   |   |  |
|         | CA-GTT-A-G-TG-GT--T---A-A-A---TA-C-GA-GG--AG-A-GT--A-G--A-A-G-G-A-AC-G-CC---AA--A--G--GT-GAA-G--A-C--A-----T-T-T-T-T---CAA--A--AT--T-----A-T--A-C-T--GA--CA-C-T-G--A-GG--T-A-CG-G--AG-G-T---T-TG--GG-G--AG-C-             |   |   |   |    |   |   |   |    |   |   |   |   |   |    |   |   |   |   |   |   |   |   |   |   |   |   |  |
|         | A-AA-----TC--GG Bacteria(100);unclassified(100);unclassified(100);unclassified(100);unclassified(100);unclassified(100);unclassified(100);unclassified(100);unclassified(100);                                            |   |   |   |    |   |   |   |    |   |   |   |   |   |    |   |   |   |   |   |   |   |   |   |   |   |   |  |
| Otu1581 | 0                                                                                                                                                                                                                         | 0 | 0 | 0 | 0  | 0 | 0 | 0 | 0  | 0 | 0 | 0 | 0 | 0 | 0  | 0 | 0 | 0 | 0 | 0 | 0 | 0 | 0 | 0 | 0 | 0 | 0 |  |
|         | 0                                                                                                                                                                                                                         | 0 | 0 | 0 | 0  | 0 | 0 | 0 | 0  | 0 | 0 | 0 | 0 | 0 | 0  | 0 | 0 | 0 | 0 | 0 | 0 | 0 | 0 | 0 | 0 | 0 | 0 |  |
|         | 0                                                                                                                                                                                                                         | 0 | 0 | 1 | 0  | 0 | 0 | 0 | 0  | 0 | 0 | 0 | 0 | 0 | 24 | 0 | 0 | 0 | 0 | 0 | 0 | 0 | 0 | 0 | 0 | 0 | 0 |  |
|         | 0                                                                                                                                                                                                                         | 0 | 0 | 0 | 0  | 0 | 0 | 0 | 0  | 0 | 0 | 0 | 0 | 0 | 0  | 0 | 0 | 0 | 0 | 0 | 0 | 0 | 0 | 0 | 0 | 0 | 0 |  |
|         | M02255_77_000000000-ADUT3_1_1105_22688_11482 T---AC--GT-AG-GGG-----GCG-A-G-----C-G-T--T--AT-C-CGG-AT-----TC-A--T-T--GG-GC-----GT--A---AA-GC-GC-GC-----G-CA-G-G-C-G-----G--C-CC-G-C-C-----                                 |   |   |   |    |   |   |   |    |   |   |   |   |   |    |   |   |   |   |   |   |   |   |   |   |   |   |  |
|         | -----AA---G-C-G-G-----CCT-C-G--TC--G-AA-GC--C-G-GG-G-G-----CT-C-AA-----C-C-C-C-C-G-G--A-----A-G--C-G--A--C-----C-CG-A-A--C-----T-G-G--CG--G-G-C---T-C-G-A-G-T--G--G-GG---CA-G-G-----G-G-A-G--GA-T-----GG--A--ATT---       |   |   |   |    |   |   |   |    |   |   |   |   |   |    |   |   |   |   |   |   |   |   |   |   |   |   |  |
|         | -C-C-C-G-GT--GT-A-G-CG-GT--G---A--A-A---TG-C-GC-AG--AT-A-TC--G-G--G-A-G-G-A-AC-A-CC--GA--C--G--GC-GAA-G--G-C--A-----G--C-C-C-T---CTG--G--GC-C-T-----T-C--A-C-T--GA--CG-C-T-G--A-GG--C-G-CG-A--AA-G-C---T-GG--             |   |   |   |    |   |   |   |    |   |   |   |   |   |    |   |   |   |   |   |   |   |   |   |   |   |   |  |
|         | GG-G--AG-C-G-AA-----CA--GG Bacteria(100);Actinobacteria(100);Actinobacteria(100);Coriobacteridae(100);Coriobacteriales(100);Coriobacterineae(100);Coriobacteriaceae(100);Slackia(100);unclassified(100);                  |   |   |   |    |   |   |   |    |   |   |   |   |   |    |   |   |   |   |   |   |   |   |   |   |   |   |  |
| Otu1582 | 0                                                                                                                                                                                                                         | 0 | 0 | 0 | 0  | 0 | 0 | 0 | 0  | 0 | 0 | 0 | 0 | 0 | 0  | 0 | 0 | 0 | 0 | 0 | 0 | 0 | 0 | 0 | 0 | 0 | 0 |  |
|         | 0                                                                                                                                                                                                                         | 0 | 0 | 0 | 0  | 0 | 0 | 0 | 0  | 0 | 0 | 0 | 0 | 0 | 0  | 0 | 0 | 0 | 0 | 0 | 0 | 0 | 0 | 0 | 0 | 0 | 0 |  |
|         | 0                                                                                                                                                                                                                         | 0 | 0 | 1 | 0  | 0 | 0 | 0 | 13 | 0 | 0 | 0 | 0 | 0 | 0  | 0 | 0 | 0 | 0 | 0 | 0 | 0 | 0 | 0 | 0 | 0 | 0 |  |
|         | 0                                                                                                                                                                                                                         | 0 | 0 | 0 | 0  | 0 | 0 | 0 | 0  | 0 | 0 | 0 | 0 | 0 | 0  | 0 | 0 | 0 | 0 | 0 | 0 | 0 | 0 | 0 | 0 | 0 | 0 |  |
|         | M02255_77_000000000-ADUT3_1_1119_4630_20182 T---AC--GG-AG-GGA-----GCT-A-G-----C--G--T--T--GT-T-CGG-AA-----TT-A--C-T--GG-GC-----GT--A---AA-GC-GC-AC-----G-TA-G-G-C-G-----G--C-TT-T-G-T-----AA-                             |   |   |   |    |   |   |   |    |   |   |   |   |   |    |   |   |   |   |   |   |   |   |   |   |   |   |  |
|         | ---G-T-C-A-----G-A-G--G--TG--A-AA-GC--C-T-GG-A-G-----CT-C-AA-----C-T-C-C-A-G-A--A-C---T-G--C-C---T-T-----T--GA-G-A--C-----T--G-C--AT--C-G-C---T-T-G-A-A-T--C---C-AG---GA-G-A-----G-G-T-G---AG-T-----GG--A--ATT---C-C-G-A- |   |   |   |    |   |   |   |    |   |   |   |   |   |    |   |   |   |   |   |   |   |   |   |   |   |   |  |
|         | GT--GT-A-G-AG-GT--G---A--A-A---TT-C-GT-AG--AT-A-TT--C-G--G-A-A-G-A-AC-A-CC--AG--T--G--GC-GAA-G--G-C--G-----A--C-T-A-C---CTG--G--AC-T-G-----A-T--A-C-T--GA--CA-C-T-G--A-GG--T-G-CG-A--AA-G-C---G-TG--GG-G--AG-C-           |   |   |   |    |   |   |   |    |   |   |   |   |   |    |   |   |   |   |   |   |   |   |   |   |   |   |  |
|         | A-AA-----CA--GG Bacteria(100);Proteobacteria(100);Alphaproteobacteria(100);Sphingomonadales(100);unclassified(100);unclassified(100);unclassified(100);unclassified(100);unclassified(100);                               |   |   |   |    |   |   |   |    |   |   |   |   |   |    |   |   |   |   |   |   |   |   |   |   |   |   |  |
| Otu1583 | 0                                                                                                                                                                                                                         | 0 | 0 | 0 | 0  | 0 | 0 | 0 | 0  | 0 | 0 | 0 | 0 | 0 | 0  | 0 | 0 | 0 | 0 | 0 | 0 | 0 | 0 | 0 | 0 | 0 | 0 |  |
|         | 0                                                                                                                                                                                                                         | 0 | 0 | 0 | 0  | 0 | 0 | 0 | 0  | 0 | 0 | 0 | 0 | 0 | 0  | 0 | 0 | 0 | 0 | 0 | 0 | 0 | 0 | 0 | 0 | 0 | 0 |  |
|         | 0                                                                                                                                                                                                                         | 0 | 0 | 0 | 9  | 0 | 0 | 0 | 0  | 0 | 0 | 0 | 0 | 0 | 0  | 0 | 0 | 0 | 0 | 0 | 0 | 0 | 0 | 0 | 0 | 0 | 0 |  |
|         | 0                                                                                                                                                                                                                         | 0 | 0 | 0 | 0  | 0 | 0 | 0 | 0  | 0 | 0 | 0 | 0 | 0 | 0  | 0 | 0 | 0 | 0 | 0 | 0 | 0 | 0 | 0 | 0 | 0 | 0 |  |
|         | M02255_77_000000000-ADUT3_1_1110_25431_5497 T---AC--GA-AG-GGG-----GCT-A-G-----C--G--T--T--GC-T-CGG-AA-----TT-A--C-T--GG-GC-----GT--A---AA-GG-GC-GC-----G-TA-G-G-C-G-----G--C-TT-G-G-C-----                                |   |   |   |    |   |   |   |    |   |   |   |   |   |    |   |   |   |   |   |   |   |   |   |   |   |   |  |
|         | CA---G-T-C-A-----G-G-C--G--TG--A-AA-TT--C-C-TG-G-G-----CT-T-AA-----C-C-T-G-G-G-G--A-C---T-G--C-G--C--T-----T--GA-T-A--C-----T--G-C--CA--G-G-C---T-T-G-A-G-G--C---C-GA---GA-G-A-----G-G-G-T---GG-T-----GG--A--ATT---C-C-C- |   |   |   |    |   |   |   |    |   |   |   |   |   |    |   |   |   |   |   |   |   |   |   |   |   |   |  |
|         | A-GT--GT-A-G-AG-GT--G---A--A-A---TT-C-GT-AG--AT-A-TT--G-G--G-A-A-G-A-AC-A-CC--GG--T--G--GC-GAA-G--G-C--G-----A--C-C-A-C---CTG--G--CT-C-G-----G-T--A-C-T--GA--CG-C-T-G--A-GG--C-G-CG-A--CA-G-C---G-TG--GG-G--              |   |   |   |    |   |   |   |    |   |   |   |   |   |    |   |   |   |   |   |   |   |   |   |   |   |   |  |
|         | AG-C-A-AA-----CA--GG Bacteria(100);Proteobacteria(100);Alphaproteobacteria(100);Rhodospirillales(100);Acetobacteraceae(100);unclassified(100);unclassified(100);unclassified(100);unclassified(100);                      |   |   |   |    |   |   |   |    |   |   |   |   |   |    |   |   |   |   |   |   |   |   |   |   |   |   |  |
| Otu1584 | 0                                                                                                                                                                                                                         | 0 | 0 | 0 | 0  | 0 | 0 | 0 | 0  | 0 | 0 | 0 | 0 | 0 | 0  | 0 | 0 | 0 | 0 | 0 | 0 | 0 | 0 | 0 | 0 | 0 | 0 |  |
|         | 0                                                                                                                                                                                                                         | 0 | 0 | 0 | 0  | 0 | 0 | 0 | 0  | 0 | 0 | 0 | 0 | 0 | 0  | 0 | 0 | 0 | 0 | 0 | 0 | 0 | 0 | 0 | 0 | 0 | 0 |  |
|         | 0                                                                                                                                                                                                                         | 0 | 0 | 0 | 10 | 0 | 0 | 0 | 0  | 0 | 0 | 0 | 0 | 0 | 0  | 0 | 0 | 0 | 0 | 0 | 0 | 0 | 0 | 0 | 0 | 0 | 0 |  |
|         | 0                                                                                                                                                                                                                         | 0 | 0 | 0 | 0  | 0 | 0 | 0 | 0  | 0 | 0 | 0 | 0 | 0 | 0  | 0 | 0 | 0 | 0 | 0 | 0 | 0 | 0 | 0 | 0 | 0 | 0 |  |
|         | M02255_77_000000000-ADUT3_1_1119_17935_13113 T---AC--GT-AG-GCA-----GCA-A-G-----C--G--T--T--GT-T-CGG-AG-----TT-A--C-T--GG-GC-----GT--A---AA-GG-GT-GC-----G-TA-G-G-C-G-----G--C-TG-T-T-T-----                               |   |   |   |    |   |   |   |    |   |   |   |   |   |    |   |   |   |   |   |   |   |   |   |   |   |   |  |
|         | -----AA---G-T-T-T-----G-G-T--G--TG--A-AA-TC--T-C-CC-G-G-----CT-C-AA-----C-C-G-G-G-A-G--G-G---T-G--C-G--C--C-----G--AA-T-A--C-----T--G-A--GT--G-G-C---T-A-G-A-G-T--G---C-GG---GA-G-A-----G-G-A-A--AG-T-----GG--A--ATT---   |   |   |   |    |   |   |   |    |   |   |   |   |   |    |   |   |   |   |   |   |   |   |   |   |   |   |  |
|         | C-C-T-G-GT--GT-A-G-CG-GT--G---A--A-A---TG-C-GT-AG--AT-A-TC--A-G--G-A-G-G-A-AC-A-CC--GG--T--G--GT-GTA-A--A-C--G-----G--C-T-T-T---CTG--G--AC-C-G-----T-A--A-C-T--GA--CG-C-T-G--A-GG--C-A-CG-A--AA-G-C---G-TG--GG-           |   |   |   |    |   |   |   |    |   |   |   |   |   |    |   |   |   |   |   |   |   |   |   |   |   |   |  |
|         | T--AG-C-A-AA-----CA--GG Bacteria(100);Acidobacteria(100);Acidobacteria(100);Acidobacteriales(100);Acidobacteriaceae(100);Candidatus_Solibacter(100);unclassified(100);unclassified(100);unclassified(100);                |   |   |   |    |   |   |   |    |   |   |   |   |   |    |   |   |   |   |   |   |   |   |   |   |   |   |  |



|                                                                                                                                                                                                                                                                                                                                                                                                                                                                                                                                                                                                                                                                                                                                                                                                                                                              |   |   |   |   |    |   |   |   |   |   |   |   |   |   |   |   |   |   |   |   |   |   |   |   |   |   |   |
|--------------------------------------------------------------------------------------------------------------------------------------------------------------------------------------------------------------------------------------------------------------------------------------------------------------------------------------------------------------------------------------------------------------------------------------------------------------------------------------------------------------------------------------------------------------------------------------------------------------------------------------------------------------------------------------------------------------------------------------------------------------------------------------------------------------------------------------------------------------|---|---|---|---|----|---|---|---|---|---|---|---|---|---|---|---|---|---|---|---|---|---|---|---|---|---|---|
| Otu1585                                                                                                                                                                                                                                                                                                                                                                                                                                                                                                                                                                                                                                                                                                                                                                                                                                                      | 0 | 0 | 0 | 0 | 0  | 0 | 0 | 0 | 0 | 0 | 0 | 0 | 0 | 0 | 0 | 0 | 0 | 0 | 0 | 0 | 0 | 0 | 0 | 0 | 0 | 0 | 0 |
|                                                                                                                                                                                                                                                                                                                                                                                                                                                                                                                                                                                                                                                                                                                                                                                                                                                              | 0 | 0 | 0 | 0 | 0  | 0 | 0 | 0 | 0 | 0 | 0 | 0 | 0 | 0 | 0 | 0 | 0 | 0 | 0 | 0 | 0 | 0 | 0 | 0 | 0 | 0 | 0 |
|                                                                                                                                                                                                                                                                                                                                                                                                                                                                                                                                                                                                                                                                                                                                                                                                                                                              | 0 | 0 | 0 | 0 | 5  | 0 | 0 | 0 | 0 | 0 | 0 | 0 | 0 | 0 | 0 | 0 | 0 | 0 | 0 | 0 | 0 | 0 | 0 | 0 | 0 | 0 | 0 |
|                                                                                                                                                                                                                                                                                                                                                                                                                                                                                                                                                                                                                                                                                                                                                                                                                                                              | 0 | 0 | 0 | 0 | 0  | 0 | 0 | 0 | 0 | 0 | 0 | 0 | 4 | 0 | 0 | 0 | 0 | 0 | 0 | 0 | 0 | 0 | 0 | 0 | 0 | 0 |   |
| M02255_77_000000000-ADUT3_1_1119_22950_9139 T---AC---GT-AG-GGT-----CCG-A-G-----C-G--T--T--GT-C-CGG-AA-----TT-A--T-T--GG-GC-----GT-A----AA-GG-GC-TC-----G-TA-G-G-C-G-----G--T-TT-G-T-C-----GC--<br>--G-T-C-G-----G-G-A--G--TG--A-AA-AC--G-C-AG-G-C----CT-T-AA-----T-T-C-T-G-C-G--C-T---T-G--C-T---T-T-----C-GA-T-A--C-----G-G-G--CA-G-A-C---T-A-G-A-G-G--T---A-TG-----CA-G-G-----G-G-A-G---AA-C-----GG--A--ATT----C-C-T-G-<br>GT--GT-A-G-CG-GT--G---A--A-A---TG-C-GC-AG--AT-A-TC--A-G--G-A-G-G-A-AC-A-CC---GG--T--G--GC-GAA-G--G-C-G-----G-T-T-C-T---CTG--G--GC-A-T-----G-T---C-C-T--GA--CG-C-T-G--A-GG--A-G-CG-A--AA-G-T---G-TG--GG-G--AG-<br>C-G-AA-----CA--GG   Bacteria(100);Actinobacteria(100);Actinobacteria(100);Actinobacteridae(100);Actinomycetales(100);Propionibacterineae(100);Nocardioidaceae(100);unclassified(100);unclassified(100);        |   |   |   |   |    |   |   |   |   |   |   |   |   |   |   |   |   |   |   |   |   |   |   |   |   |   |   |
| Otu1586                                                                                                                                                                                                                                                                                                                                                                                                                                                                                                                                                                                                                                                                                                                                                                                                                                                      | 0 | 0 | 0 | 0 | 0  | 0 | 0 | 0 | 0 | 0 | 0 | 0 | 0 | 0 | 0 | 0 | 0 | 0 | 0 | 0 | 0 | 0 | 0 | 0 | 0 | 0 | 0 |
|                                                                                                                                                                                                                                                                                                                                                                                                                                                                                                                                                                                                                                                                                                                                                                                                                                                              | 0 | 0 | 0 | 0 | 0  | 0 | 0 | 0 | 0 | 0 | 0 | 0 | 0 | 0 | 0 | 0 | 0 | 0 | 0 | 0 | 0 | 0 | 0 | 0 | 0 | 0 | 0 |
|                                                                                                                                                                                                                                                                                                                                                                                                                                                                                                                                                                                                                                                                                                                                                                                                                                                              | 0 | 0 | 0 | 0 | 11 | 0 | 0 | 0 | 0 | 0 | 0 | 0 | 0 | 0 | 0 | 0 | 0 | 0 | 0 | 0 | 0 | 0 | 0 | 0 | 0 | 0 | 0 |
|                                                                                                                                                                                                                                                                                                                                                                                                                                                                                                                                                                                                                                                                                                                                                                                                                                                              | 0 | 0 | 0 | 0 | 0  | 0 | 0 | 0 | 0 | 0 | 0 | 0 | 0 | 0 | 0 | 0 | 0 | 0 | 0 | 0 | 0 | 0 | 0 | 0 | 0 | 0 |   |
| M02255_77_000000000-ADUT3_1_2101_24265_14931           T---AC--GA-AG-GGG-----GCT-A-G-----C-G--T--T--GC-T-CGG-AA-----TT-A--C-T--GG-GC-----GT-A----AA-GG-GA-GC-----G-TA-G-G-C-G-----G--A-TC-G-T-T----<br>-----TA---G-T-T-G-----G-G-G--G--TG--A-AA-TC--C-C-GG-G-G-----CT-C-AA-----C-C-T-C-G-G-A--A-C---T-G--C-C---T-T-----C-AA-T-A--C-----T--G-G--CG--A-T-C---T-T-G-A-G-T-A--T-GG-----GA-G-A-----G-G-T-G--AG-T----GG--A--ACT---<br>C-C-G-A-GT--GT-A-G-AG-GT--G---A--A-A---TT-C-GT-AG--AT-A-TT--C-G--G-A-A-G-A-AC-A-CC---AG--T--G--GC-GAA-G--G-C-G-----A--C-T-C-A---CTG--G--CC-C-A-----T-T---A-C-T--GA--CG-C-T-G--A-GG--C-T-CG-A--AA-G-C---G-TG--GG-<br>G--AG-C-A-AA-----CA--GG   Bacteria(100);Proteobacteria(100);Alphaproteobacteria(100);Caulobacterales(100);Caulobacteraceae(100);unclassified(100);unclassified(100);unclassified(100);unclassified(100); |   |   |   |   |    |   |   |   |   |   |   |   |   |   |   |   |   |   |   |   |   |   |   |   |   |   |   |
| Otu1587                                                                                                                                                                                                                                                                                                                                                                                                                                                                                                                                                                                                                                                                                                                                                                                                                                                      | 0 | 0 | 0 | 0 | 0  | 0 | 0 | 0 | 0 | 0 | 0 | 0 | 0 | 0 | 0 | 0 | 0 | 0 | 0 | 0 | 0 | 0 | 0 | 0 | 0 | 0 | 0 |
|                                                                                                                                                                                                                                                                                                                                                                                                                                                                                                                                                                                                                                                                                                                                                                                                                                                              | 0 | 0 | 0 | 0 | 0  | 0 | 0 | 0 | 0 | 0 | 0 | 0 | 0 | 0 | 0 | 0 | 0 | 0 | 0 | 0 | 0 | 0 | 0 | 0 | 0 | 0 | 0 |
|                                                                                                                                                                                                                                                                                                                                                                                                                                                                                                                                                                                                                                                                                                                                                                                                                                                              | 0 | 0 | 0 | 0 | 9  | 0 | 0 | 0 | 0 | 0 | 0 | 0 | 0 | 0 | 0 | 0 | 0 | 0 | 0 | 0 | 0 | 0 | 0 | 0 | 0 | 0 | 0 |
|                                                                                                                                                                                                                                                                                                                                                                                                                                                                                                                                                                                                                                                                                                                                                                                                                                                              | 0 | 0 | 0 | 0 | 0  | 0 | 0 | 0 | 0 | 0 | 0 | 0 | 0 | 0 | 0 | 0 | 0 | 0 | 0 | 0 | 0 | 0 | 0 | 0 | 0 | 0 |   |
| M02255_77_000000000-ADUT3_1_1108_25734_15369           T---AC--GT-AG-GTG-----GCA-A-G-----C-G--T--T--GT-C-CGG-AT-----TT-A--C-T--GG-GT-----GT-A----AA-GG-GC-GT-----G-TA-G-G-C-G-----G--G-TT-A-A-C-----<br>-----AA---G-T-C-A-----G-A-T--G--TG--A-AA-TTC-C---GG-G-G-----CT-C-AA-----C-C-C-C-G-G-C--G-C---T-G--C-A--T-T-----T-GA-A-A--C-----T--G-T--TA--A-T-C---T-T-G-A-G-T-G--C-TG-----GA-G-A-----G-G-A-A--AG-C-----GG--A--ATT----C-<br>C-T-A-GT--GT-A-G-CG-GT--G---A--A-A---TG-C-GT-AG--AT-A-TT--A-G--G-A-G-G-A-AC-A-CC---AG--T--G--GC-GAA-G--G-C-G-----G--C-T-T-T---CTG--G--AC-A-G-----T-A---A-C-T--GA--CG-C-T-G--A-GG--C-G-CG-A--AA-G-C---G-TG--GG-<br>G--AG-C-A-AA-----CA--GG   Bacteria(100);Firmicutes(100);Clostridia(100);Clostridiales(100);Ruminococcaceae(100);Acetivibrio(100);unclassified(100);unclassified(100);unclassified(100);                |   |   |   |   |    |   |   |   |   |   |   |   |   |   |   |   |   |   |   |   |   |   |   |   |   |   |   |
| Otu1588                                                                                                                                                                                                                                                                                                                                                                                                                                                                                                                                                                                                                                                                                                                                                                                                                                                      | 0 | 0 | 0 | 0 | 0  | 0 | 0 | 0 | 0 | 0 | 0 | 0 | 0 | 0 | 0 | 0 | 0 | 0 | 0 | 0 | 0 | 0 | 0 | 0 | 0 | 0 | 0 |
|                                                                                                                                                                                                                                                                                                                                                                                                                                                                                                                                                                                                                                                                                                                                                                                                                                                              | 0 | 0 | 0 | 0 | 0  | 0 | 0 | 0 | 0 | 0 | 0 | 0 | 0 | 0 | 0 | 0 | 0 | 0 | 0 | 0 | 0 | 0 | 0 | 0 | 0 | 0 | 0 |
|                                                                                                                                                                                                                                                                                                                                                                                                                                                                                                                                                                                                                                                                                                                                                                                                                                                              | 0 | 0 | 0 | 0 | 0  | 0 | 0 | 0 | 0 | 0 | 0 | 0 | 0 | 6 | 8 | 0 | 0 | 0 | 0 | 0 | 0 | 0 | 0 | 0 | 0 | 0 | 0 |
|                                                                                                                                                                                                                                                                                                                                                                                                                                                                                                                                                                                                                                                                                                                                                                                                                                                              | 0 | 0 | 0 | 0 | 0  | 0 | 0 | 0 | 0 | 0 | 0 | 0 | 0 | 0 | 0 | 0 | 0 | 0 | 0 | 0 | 0 | 0 | 0 | 0 | 0 | 0 |   |
| M02255_76_000000000-ADUNE_1_1102_15025_7955 G---AG--GA-AG-CCA-----CGG-C-T-----A-A--C---T--AC-G-TGC-CA-----GC-A--G-C--CG-CG-----GT-A----AT-AC-GT-AG-----G-TG-G-C-G-A-----G--C-GT-T-G-T-----CC-<br>---G-G-A-T-----T-T-C--T--TA--A-AA-GT--T-C-GG-G-G-----CT-C-AA-----C-C-C-C-G-T-G--A-----T-G--G-G--A--A-----A-GA-A-A--C-----T--A-C--AT--G-T-C---T-T-G-A-G-T-A--C-AG-----GA-G-A-----G-G-A-A--AG-C-----GG--A--ATT----C-C-C-A-<br>GT--GT-A-G-CG-GT--G---A--A-A---TG-C-GT-AG--AT-A-TT--G-G--G-A-G-G-A-AC-A-CC---AG--T--G--GC-GAA-G--G-C-G-----G--C-T-T-T---CTG--G--AC-T-G-----C-A---A-C-T--GA--CG-C-T-G--A-GG--C-T-CG-A--AA-G-C---C-AG--GG-G--AG-<br>C-G-AA-----CG--GG   Bacteria(100);Firmicutes(100);Clostridia(100);Clostridiales(100);Veillonellaceae(100);unclassified(100);unclassified(100);unclassified(100);unclassified(100);                            |   |   |   |   |    |   |   |   |   |   |   |   |   |   |   |   |   |   |   |   |   |   |   |   |   |   |   |
| Otu1589                                                                                                                                                                                                                                                                                                                                                                                                                                                                                                                                                                                                                                                                                                                                                                                                                                                      | 0 | 0 | 0 | 0 | 0  | 0 | 0 | 0 | 0 | 0 | 0 | 0 | 0 | 0 | 0 | 0 | 0 | 0 | 0 | 0 | 0 | 0 | 0 | 0 | 0 | 0 | 0 |
|                                                                                                                                                                                                                                                                                                                                                                                                                                                                                                                                                                                                                                                                                                                                                                                                                                                              | 0 | 0 | 0 | 0 | 0  | 0 | 0 | 0 | 0 | 0 | 0 | 0 | 0 | 0 | 0 | 0 | 0 | 0 | 0 | 0 | 0 | 0 | 0 | 0 | 0 | 0 | 0 |
|                                                                                                                                                                                                                                                                                                                                                                                                                                                                                                                                                                                                                                                                                                                                                                                                                                                              | 0 | 0 | 0 | 0 | 0  | 5 | 0 | 0 | 0 | 0 | 0 | 0 | 0 | 0 | 0 | 0 | 0 | 0 | 0 | 0 | 0 | 0 | 0 | 0 | 0 | 0 | 0 |
|                                                                                                                                                                                                                                                                                                                                                                                                                                                                                                                                                                                                                                                                                                                                                                                                                                                              | 0 | 0 | 0 | 0 | 0  | 0 | 0 | 0 | 0 | 0 | 0 | 0 | 0 | 0 | 0 | 0 | 0 | 0 | 0 | 0 | 0 | 0 | 0 | 0 | 0 | 0 |   |
| M02255_77_000000000-ADUT3_1_2104_3357_16010 T----AA---CT-AC-GTG-----CC--A-G-----C--A--G---C--CG-C-GGT-AA-----TA-C--G-T--AG-GT-----CC--C----GA-GC-GT-TG-----T-CC-G-G-T-G-----G--T-TT-A-A-T-----AA---<br>-G-T-C-T-----G-A-T--G--TA--A-AA-GG--C-A-GT-G-G-----CT-C-AA-----C-C-A-T-T-G-T--G-----T-G--C-A--T-T-----G--GA-A-A--C-----T--G-T--TA--G-A-C---T-G-G-A-G-T-G---C-AG-----TA-G-A-----G-G-A-G--AG-T-----GG--A--ATT----C-C-A-T-GT-<br>-GT-A-G-CG-GT--G---A--A-A---TG-C-GT-AG--AT-A-TA--T-G--G-A-G-G-A-AC-A-CC---GG--T--G--GC-GAA-A--G-C--G-----G--C-T-C-T---CTG--G--AC-T-G-----T-A---A-C-T--GA--CA-C-T-G--A-GG--C-T-CG-A--AA-G-C---G-TG--GG-T--AG-C-A-<br>AA-----CA--GG   Bacteria(100);Firmicutes(100);Bacilli(100);Lactobacillales(100);Streptococcaceae(100);Lactococcus(100);unclassified(100);unclassified(100);unclassified(100);                       |   |   |   |   |    |   |   |   |   |   |   |   |   |   |   |   |   |   |   |   |   |   |   |   |   |   |   |



|                                                                                                                                                                                                                |   |   |   |   |   |   |   |   |   |   |   |   |   |   |   |   |   |   |   |   |   |   |   |   |   |   |   |
|----------------------------------------------------------------------------------------------------------------------------------------------------------------------------------------------------------------|---|---|---|---|---|---|---|---|---|---|---|---|---|---|---|---|---|---|---|---|---|---|---|---|---|---|---|
| Otu1590                                                                                                                                                                                                        | 0 | 0 | 0 | 0 | 0 | 0 | 0 | 0 | 0 | 0 | 0 | 0 | 0 | 0 | 0 | 0 | 0 | 0 | 0 | 0 | 0 | 0 | 0 | 0 | 0 | 0 | 0 |
|                                                                                                                                                                                                                | 0 | 0 | 0 | 0 | 0 | 0 | 0 | 0 | 0 | 0 | 0 | 0 | 0 | 0 | 0 | 0 | 0 | 0 | 0 | 0 | 0 | 0 | 0 | 0 | 0 | 0 | 0 |
|                                                                                                                                                                                                                | 0 | 0 | 0 | 0 | 0 | 5 | 0 | 0 | 0 | 0 | 0 | 0 | 0 | 0 | 0 | 0 | 0 | 0 | 0 | 0 | 0 | 0 | 0 | 0 | 0 | 0 | 0 |
|                                                                                                                                                                                                                | 0 | 0 | 0 | 0 | 0 | 0 | 0 | 0 | 0 | 0 | 0 | 0 | 0 | 0 | 0 | 0 | 0 | 0 | 0 | 0 | 0 | 0 | 0 | 0 | 0 | 0 | 0 |
| M02255_77_000000000-ADUT3_1_1112_13731_8674 T---AC---GG-AA-GAT-----CCA-A-G-----C-G-T---T-AT-C-CGG-AA-----TT-A-C-T-GG-GC-----GT-A---AA-GA-GTTGC-----G-TA-G-G-C-G-----G-C-AT-G-A-T-----                          |   |   |   |   |   |   |   |   |   |   |   |   |   |   |   |   |   |   |   |   |   |   |   |   |   |   |   |
| AA---G-T-C-A-----G-C-A-G-TG--A-AA-GC--G-T-GG-G-G----CT-C-AA-----C-C-C-C-A-T-A-T-A---C-A-T-T--G-T-----T-GA-A-A--C-----T-A-T-TA-A-G-C---T-A-G-A-G-G-A--T-GA---GA-G-A-----G-G-T-T--AT-T-----GG-A-ATT---C-C-C-     |   |   |   |   |   |   |   |   |   |   |   |   |   |   |   |   |   |   |   |   |   |   |   |   |   |   |   |
| A-GT--GT-A-G-GA-GT--G---A-A-A---TC-C-GT-AG--AT-A-TT--G-G--G-A-G-G-A-AC-A-CC---GA-T-G-GC-GTA-G--G-C-A-----G-A-T-A-A---CTG--G--CT-C-A-----T-T---C-C-T-GA-CG-C-T-A--A-GG--C-A-CG-A-AA-G-C---G-TG--GG-G--AG-       |   |   |   |   |   |   |   |   |   |   |   |   |   |   |   |   |   |   |   |   |   |   |   |   |   |   |   |
| C-A-AA-----CG--GG    Bacteria(100);Candidate_division_TM7(100);unclassified(100);unclassified(100);unclassified(100);unclassified(100);unclassified(100);unclassified(100);unclassified(100);                  |   |   |   |   |   |   |   |   |   |   |   |   |   |   |   |   |   |   |   |   |   |   |   |   |   |   |   |
| Otu1591                                                                                                                                                                                                        | 0 | 0 | 0 | 0 | 0 | 0 | 0 | 0 | 0 | 0 | 0 | 0 | 0 | 0 | 0 | 0 | 0 | 0 | 0 | 0 | 0 | 0 | 0 | 0 | 0 | 0 | 0 |
|                                                                                                                                                                                                                | 0 | 0 | 0 | 0 | 0 | 0 | 0 | 0 | 0 | 0 | 0 | 0 | 0 | 0 | 0 | 0 | 0 | 0 | 0 | 0 | 0 | 0 | 0 | 0 | 0 | 0 | 0 |
|                                                                                                                                                                                                                | 0 | 0 | 0 | 0 | 0 | 7 | 0 | 0 | 0 | 0 | 0 | 0 | 0 | 0 | 1 | 0 | 0 | 0 | 0 | 0 | 0 | 0 | 0 | 0 | 0 | 0 | 0 |
|                                                                                                                                                                                                                | 0 | 0 | 0 | 0 | 0 | 0 | 0 | 0 | 0 | 0 | 0 | 0 | 0 | 0 | 0 | 0 | 0 | 0 | 0 | 0 | 0 | 0 | 0 | 0 | 0 | 0 | 0 |
| M02255_77_000000000-ADUT3_1_1116_14278_15046            G---AC---GA-GG-GGT-----CCA-A-G-----C-G-T---T-GT-T-CGG-AA-----TC-A-T-T-GG-GC-----GT-A---AA-GC-GG-GT-----G-TA-G-G-C-G-----G-C-CT-T-G-C---                |   |   |   |   |   |   |   |   |   |   |   |   |   |   |   |   |   |   |   |   |   |   |   |   |   |   |   |
| -----AA---G-T-C-A-----G-A-A-G-TG--A-AA-GC--C-C-TG-G-G----CT-C-AA-----C-C-C-A-G-G-A-A-G---T-G-C-T--T-T-----T-GA-A-A--C-----T-G-C-AG-G-G-C---T-T-G-A-G-T-G--T-GG---GA-G-A-----G-G-A-T--AG-T-----GG-A-ATT---      |   |   |   |   |   |   |   |   |   |   |   |   |   |   |   |   |   |   |   |   |   |   |   |   |   |   |   |
| C-C-A-G-GT--GT-A-G-TG-GT--G---A-A-A---TA-C-GT-AG--AG-A-TC--T-G--G-A-G-G-A-AC-A-CC--GG--T-G--GC-GAA-G--G-C-G-----G-C-T-A-T---CTG--G--CC-C-A-----A-C--A-C-T-GA-CG-C-T-C-A-GA--C-C-CG-A-AA-G-C---G-TG--GG-        |   |   |   |   |   |   |   |   |   |   |   |   |   |   |   |   |   |   |   |   |   |   |   |   |   |   |   |
| G--AT-C-A-AA-----CA--GG    Bacteria(100);unclassified(100);unclassified(100);unclassified(100);unclassified(100);unclassified(100);unclassified(100);unclassified(100);unclassified(100);                      |   |   |   |   |   |   |   |   |   |   |   |   |   |   |   |   |   |   |   |   |   |   |   |   |   |   |   |
| Otu1592                                                                                                                                                                                                        | 0 | 0 | 0 | 0 | 0 | 0 | 0 | 0 | 0 | 0 | 0 | 0 | 0 | 0 | 0 | 0 | 0 | 0 | 0 | 0 | 0 | 0 | 0 | 0 | 0 | 0 | 0 |
|                                                                                                                                                                                                                | 0 | 0 | 0 | 0 | 0 | 0 | 0 | 0 | 0 | 0 | 0 | 0 | 0 | 0 | 0 | 0 | 0 | 0 | 0 | 0 | 0 | 0 | 0 | 0 | 0 | 0 | 0 |
|                                                                                                                                                                                                                | 0 | 0 | 0 | 0 | 0 | 0 | 5 | 0 | 0 | 0 | 0 | 0 | 0 | 0 | 0 | 0 | 0 | 0 | 0 | 0 | 0 | 0 | 0 | 0 | 0 | 0 | 0 |
|                                                                                                                                                                                                                | 0 | 0 | 0 | 0 | 0 | 0 | 0 | 0 | 0 | 0 | 0 | 0 | 0 | 0 | 0 | 0 | 0 | 0 | 0 | 0 | 0 | 0 | 0 | 0 | 0 | 0 | 0 |
| M02255_77_000000000-ADUT3_1_1101_18852_13360            T---AC---GT-AG-GGT-----CCG-A-G-----C-G-T---T-GT-C-CGG-AT-----TT-A-T-T-GG-GC-----GT-A---AA-GA-GC-TC-----G-TA-G-G-C-G-----G-T-TC-G-C-T-----              |   |   |   |   |   |   |   |   |   |   |   |   |   |   |   |   |   |   |   |   |   |   |   |   |   |   |   |
| -----AA---G-T-C-G-----G-A-T-G-TG--A-AA-AC--T-C-GG-G-G----CT-C-AA-----C-C-C-C-G-A-G--A-C---G-C-C-A--T-C-----C-GA-T-A--C-----T-G-G-CGT--G-A-C---T-T-G-A-G-T-C--T-GG---TA-G-G-----G-G-A-G--AT-C-----GG-A-ATT---C- |   |   |   |   |   |   |   |   |   |   |   |   |   |   |   |   |   |   |   |   |   |   |   |   |   |   |   |
| C-T-G-GT--GT-A-G-CG-GT--G---A-A-A---TG-C-GC-AG--AT-A-TC--A-G--G-A-G-G-A-AC-A-CC--GG--T-G--GC-GAA-G--G-C-G-----G-A-T-C-T---CTG--G--GC-C-A-----G-T--A-C-T-GA-CG-C-T-G-A-GG--A-G-CG-A-AA-G-C---G-TG--GG-          |   |   |   |   |   |   |   |   |   |   |   |   |   |   |   |   |   |   |   |   |   |   |   |   |   |   |   |
| G--AG-C-A-AA-----CA--GG    Bacteria(100);Actinobacteria(100);Actinobacteria(100);unclassified(100);unclassified(100);unclassified(100);unclassified(100);unclassified(100);unclassified(100);                  |   |   |   |   |   |   |   |   |   |   |   |   |   |   |   |   |   |   |   |   |   |   |   |   |   |   |   |
| Otu1593                                                                                                                                                                                                        | 0 | 0 | 0 | 0 | 0 | 0 | 0 | 0 | 0 | 0 | 0 | 0 | 0 | 0 | 0 | 0 | 0 | 0 | 0 | 0 | 0 | 0 | 0 | 0 | 0 | 0 | 0 |
|                                                                                                                                                                                                                | 0 | 0 | 0 | 0 | 0 | 0 | 0 | 0 | 0 | 0 | 0 | 0 | 0 | 0 | 0 | 0 | 0 | 0 | 0 | 0 | 0 | 0 | 0 | 0 | 0 | 0 | 0 |
|                                                                                                                                                                                                                | 0 | 0 | 0 | 0 | 0 | 0 | 6 | 0 | 0 | 0 | 0 | 0 | 0 | 0 | 0 | 0 | 0 | 0 | 0 | 0 | 0 | 0 | 0 | 0 | 0 | 0 | 0 |
|                                                                                                                                                                                                                | 0 | 0 | 0 | 0 | 0 | 0 | 0 | 0 | 0 | 0 | 0 | 0 | 0 | 0 | 0 | 0 | 0 | 0 | 0 | 0 | 0 | 0 | 0 | 0 | 0 | 0 | 0 |
| M02255_77_000000000-ADUT3_1_1113_2                                                                                                                                                                             |   |   |   |   |   |   |   |   |   |   |   |   |   |   |   |   |   |   |   |   |   |   |   |   |   |   |   |



|                                                                                                                                                                                                                            |   |   |   |   |   |   |   |   |   |   |   |   |   |   |    |    |   |   |   |   |   |   |   |   |   |   |   |
|----------------------------------------------------------------------------------------------------------------------------------------------------------------------------------------------------------------------------|---|---|---|---|---|---|---|---|---|---|---|---|---|---|----|----|---|---|---|---|---|---|---|---|---|---|---|
| Otu1595                                                                                                                                                                                                                    | 0 | 0 | 0 | 0 | 0 | 0 | 0 | 0 | 0 | 0 | 0 | 0 | 0 | 0 | 0  | 0  | 0 | 0 | 0 | 0 | 0 | 0 | 0 | 0 | 0 | 0 | 0 |
|                                                                                                                                                                                                                            | 0 | 0 | 0 | 0 | 0 | 0 | 0 | 0 | 0 | 0 | 0 | 0 | 0 | 0 | 0  | 0  | 0 | 0 | 0 | 0 | 0 | 0 | 0 | 0 | 0 | 0 | 0 |
|                                                                                                                                                                                                                            | 0 | 0 | 0 | 0 | 0 | 0 | 1 | 4 | 0 | 0 | 0 | 0 | 0 | 0 | 0  | 0  | 0 | 0 | 0 | 0 | 0 | 0 | 0 | 0 | 0 | 0 | 0 |
|                                                                                                                                                                                                                            | 0 | 0 | 0 | 0 | 0 | 0 | 0 | 0 | 0 | 0 | 0 | 0 | 0 | 0 | 0  | 0  | 0 | 0 | 0 | 0 | 0 | 0 | 0 | 0 | 0 | 0 | 0 |
| M02255_76_000000000-ADUNE_1_1119_8445_7056 C---TA---AC-TC-CGT-----GCC-A-G----C---A--G--CC-G-CGG-TA-----AT-A-C-G-GA-GG-----GT--G---CA-A-GC-GT-----T-AA-T-C-G-G-----A--T-TT-G-T-T-----AA----                                 |   |   |   |   |   |   |   |   |   |   |   |   |   |   |    |    |   |   |   |   |   |   |   |   |   |   |   |
| G-T-C-A-----G-A-T--G--TG--A-AA-TC--C-C-CG-A-G----CT-T-AA-----C-T-T-G-G-G-A--A-C---T-G--C-A---T--T-----T--GA-A-A--C-----T--G-G--CA--A-G-C---T-A-G-A-G-T--C---T-TG---TA-G-A-----G-G-G-G--GG-T-----AG--A--ATT---C-C-A-G-GT--- |   |   |   |   |   |   |   |   |   |   |   |   |   |   |    |    |   |   |   |   |   |   |   |   |   |   |   |
| GT-A-G-CG-GT--G---A--A-A---TG-C-GT-AG--AG-A-TC--T-G--G-A-G-G-A-AT-A-CC--GG--T--G--GC-GAA-G--G-C--G-----G--C-C-C-C---CTG--G--AC-A-A-----A-G--A-C-T-GA--CG-C-T-C--A-GG--T-G-CG-A-AA-G-C---G-TG--GG-G--AG-C-A-                |   |   |   |   |   |   |   |   |   |   |   |   |   |   |    |    |   |   |   |   |   |   |   |   |   |   |   |
| AA-----CA--GG Bacteria(100);Proteobacteria(100);Gammaproteobacteria(100);Enterobacteriales(100);Enterobacteriaceae(100);unclassified(100);unclassified(100);unclassified(100);unclassified(100);                           |   |   |   |   |   |   |   |   |   |   |   |   |   |   |    |    |   |   |   |   |   |   |   |   |   |   |   |
| Otu1596                                                                                                                                                                                                                    | 0 | 0 | 0 | 0 | 0 | 0 | 0 | 0 | 0 | 0 | 0 | 0 | 0 | 0 | 0  | 0  | 0 | 0 | 0 | 0 | 0 | 0 | 0 | 0 | 0 | 0 | 0 |
|                                                                                                                                                                                                                            | 0 | 0 | 0 | 0 | 0 | 0 | 0 | 0 | 0 | 0 | 0 | 0 | 0 | 0 | 0  | 0  | 0 | 0 | 0 | 0 | 0 | 0 | 0 | 0 | 0 | 0 | 0 |
|                                                                                                                                                                                                                            | 0 | 0 | 0 | 0 | 0 | 0 | 0 | 0 | 0 | 0 | 0 | 0 | 0 | 0 | 0  | 40 | 0 | 0 | 0 | 0 | 0 | 0 | 0 | 0 | 0 | 0 | 0 |
|                                                                                                                                                                                                                            | 0 | 0 | 0 | 0 | 0 | 0 | 0 | 0 | 0 | 0 | 0 | 0 | 0 | 0 | 0  | 0  | 0 | 0 | 0 | 0 | 0 | 0 | 0 | 0 | 0 | 0 | 0 |
| M02255_77_000000000-ADUT3_1_1109_9078_17931 T---AC--GG-AG-GGG-----GCT-A-G----C-G--T---T--GT-T-CGG-AA-----TT-A--C-T--GG-GC-----GT--A---AA-GC-GC-AC-----G-TA-G-G-C-G-----G--A-TC-A-G-T-----                                  |   |   |   |   |   |   |   |   |   |   |   |   |   |   |    |    |   |   |   |   |   |   |   |   |   |   |   |
| AA---G-T-T-A-----G-G-G--G--TG--A-AA-GC--C-C-AG-G-G----CT-C-AA-----C-C-C-T-G-G-A--A-C---T-G--C-C---T--T-----T--AA-T-A--C-----T--G-C--TG--G-T-C---T-G-G-A-G-T--C---C-GA---GA-G-A-----G-G-T-G--AG-T-----GG--A--ATT---C-C-G-   |   |   |   |   |   |   |   |   |   |   |   |   |   |   |    |    |   |   |   |   |   |   |   |   |   |   |   |
| A-GT--GT-A-G-AG-GT--G---A--A-A---TT-C-GT-AG--AT-A-TT--C-G--G-A-G-G-A-AC-A-CC--AG--T--G--GC-GAA-G--G-C--G-----G--C-T-C-A---CTG--G--CT-C-G-----G-T--A-C-T-GA--CG-C-T-G--A-GG--T-G-CG-A-AA-G-C---G-TG--GG-G--                 |   |   |   |   |   |   |   |   |   |   |   |   |   |   |    |    |   |   |   |   |   |   |   |   |   |   |   |
| AG-C-A-AA-----CA--GG Bacteria(100);Proteobacteria(100);Alphaproteobacteria(100);unclassified(100);unclassified(100);unclassified(100);unclassified(100);unclassified(100);unclassified(100);                               |   |   |   |   |   |   |   |   |   |   |   |   |   |   |    |    |   |   |   |   |   |   |   |   |   |   |   |
| Otu1597                                                                                                                                                                                                                    | 0 | 0 | 0 | 0 | 0 | 0 | 0 | 0 | 0 | 0 | 0 | 0 | 0 | 0 | 0  | 0  | 0 | 0 | 0 | 0 | 0 | 0 | 0 | 0 | 0 | 0 | 0 |
|                                                                                                                                                                                                                            | 0 | 0 | 0 | 0 | 0 | 0 | 0 | 0 | 0 | 0 | 0 | 0 | 0 | 0 | 0  | 0  | 0 | 0 | 0 | 0 | 0 | 0 | 0 | 0 | 0 | 0 | 0 |
|                                                                                                                                                                                                                            | 0 | 0 | 0 | 0 | 0 | 0 | 0 | 0 | 0 | 0 | 0 | 0 | 0 | 0 | 20 | 0  | 0 | 0 | 0 | 0 | 0 | 0 | 0 | 0 | 0 | 0 | 0 |
|                                                                                                                                                                                                                            | 0 | 0 | 0 | 0 | 0 | 0 | 0 | 0 | 0 | 0 | 0 | 0 | 0 | 0 | 0  | 0  | 0 | 0 | 0 | 0 | 0 | 0 | 0 | 0 | 0 | 0 | 0 |
| M02255_77_000000000-ADUT3_1_1103_20435_12803 T---AC--GT-AG-GTG-----ACA-A-G----C-G--T---T--AT-C-CGG-AT-----TT-A--C-T--GG-GC-----GT--A---AA-GG-GC-GT-----G-TA-G-G-C-G-----G--T-TT-G-G-C-----                                 |   |   |   |   |   |   |   |   |   |   |   |   |   |   |    |    |   |   |   |   |   |   |   |   |   |   |   |
| -----AA---G-T-C-A-----G-A-A--G--TG--A-AA-TT--C-C-TG-A-G----CT-C-AA-----C-T-C-G-G-G-C--G-C---T-G--C-T---T--C-----T--GA-A-A--C-----T--G-C--TA--G-A-C---T-T-G-A-G-T--G---C-TG---GA-G-G-----G-G-A-T--AG-C-----GG--A--ATT---C-  |   |   |   |   |   |   |   |   |   |   |   |   |   |   |    |    |   |   |   |   |   |   |   |   |   |   |   |
| C-T-A-GT--GG-A-G-CG-GT--A---A--A-A---TG-C-GC-AG--AT-A-TT--A-G--G-A-A-G-A-AC-A-CC--GG--T--G--GC-GAA-G--G-C--G-----G--C-T-A-T---CTG--G--AC-A-G-----T-A---A-C-T--GA--CG-C-T-G--A-GG--C-G-CG-A-AA-G-C---G-TG--GG-              |   |   |   |   |   |   |   |   |   |   |   |   |   |   |    |    |   |   |   |   |   |   |   |   |   |   |   |
| G--AG-C-A-AA-----CA--GG Bacteria(100);unclassified(100);unclassified(100);unclassified(100);unclassified(100);unclassified(100);unclassified(100);unclassified(100);unclassified(100);                                     |   |   |   |   |   |   |   |   |   |   |   |   |   |   |    |    |   |   |   |   |   |   |   |   |   |   |   |
| Otu1598                                                                                                                                                                                                                    | 0 | 0 | 0 | 0 | 0 | 0 | 0 | 0 | 0 | 0 | 0 | 0 | 0 | 0 | 0  | 0  | 0 | 0 | 0 | 0 | 0 | 0 | 0 | 0 | 0 | 0 | 0 |
|                                                                                                                                                                                                                            | 0 | 0 | 0 | 0 | 0 | 0 | 0 | 0 | 0 | 0 | 0 | 0 | 0 | 0 | 0  | 0  | 0 | 0 | 0 | 0 | 0 | 0 | 0 | 0 | 0 | 0 | 0 |
|                                                                                                                                                                                                                            | 0 | 0 | 0 | 0 | 0 | 0 | 0 | 0 | 0 | 0 | 0 | 0 | 0 | 0 | 36 | 0  | 0 | 0 | 0 | 0 | 0 | 0 | 0 | 0 | 0 | 0 | 0 |
|                                                                                                                                                                                                                            | 0 | 0 | 0 | 0 | 0 | 0 | 0 | 0 | 0 | 0 | 0 | 0 | 0 | 0 | 0  | 0  | 0 | 0 | 0 | 0 | 0 | 0 | 0 | 0 | 0 | 0 | 0 |
| M02255_77_000000000-ADUT3_1_21                                                                                                                                                                                             |   |   |   |   |   |   |   |   |   |   |   |   |   |   |    |    |   |   |   |   |   |   |   |   |   |   |   |



|                                                                                                                                                                                                                                                                                                                                                                                                                                                                                                                                                                                                                                                                                                                                                                                                                |   |   |   |   |   |   |   |   |   |   |   |   |    |   |    |    |   |   |   |   |   |   |   |   |   |   |   |
|----------------------------------------------------------------------------------------------------------------------------------------------------------------------------------------------------------------------------------------------------------------------------------------------------------------------------------------------------------------------------------------------------------------------------------------------------------------------------------------------------------------------------------------------------------------------------------------------------------------------------------------------------------------------------------------------------------------------------------------------------------------------------------------------------------------|---|---|---|---|---|---|---|---|---|---|---|---|----|---|----|----|---|---|---|---|---|---|---|---|---|---|---|
| Otu1600                                                                                                                                                                                                                                                                                                                                                                                                                                                                                                                                                                                                                                                                                                                                                                                                        | 0 | 0 | 0 | 0 | 0 | 0 | 0 | 0 | 0 | 0 | 0 | 0 | 0  | 0 | 0  | 0  | 0 | 0 | 0 | 0 | 0 | 0 | 0 | 0 | 0 | 0 | 0 |
|                                                                                                                                                                                                                                                                                                                                                                                                                                                                                                                                                                                                                                                                                                                                                                                                                | 0 | 0 | 0 | 0 | 0 | 0 | 0 | 0 | 0 | 0 | 0 | 0 | 0  | 0 | 0  | 0  | 0 | 0 | 0 | 0 | 0 | 0 | 0 | 0 | 0 | 0 | 0 |
|                                                                                                                                                                                                                                                                                                                                                                                                                                                                                                                                                                                                                                                                                                                                                                                                                | 0 | 0 | 0 | 0 | 0 | 0 | 0 | 0 | 0 | 0 | 0 | 0 | 0  | 0 | 14 | 0  | 0 | 0 | 0 | 0 | 0 | 0 | 0 | 0 | 0 | 0 | 0 |
|                                                                                                                                                                                                                                                                                                                                                                                                                                                                                                                                                                                                                                                                                                                                                                                                                | 0 | 0 | 0 | 0 | 0 | 0 | 0 | 0 | 0 | 0 | 0 | 0 | 0  | 0 | 0  | 0  | 0 | 0 | 0 | 0 | 0 | 0 | 0 | 0 | 0 | 0 | 0 |
| M02255_77_000000000-ADUT3_1_2107_18042_19017 T---AC---GG-AG-GGG-----GCT-A-G-----C-G-T---T-GT-T-CGG-AA-----TG-A-C-T--GG-GC-----GT--A---AA-GC-GC-GC-----G-TA-G-G-C-G-----G-A-TC-G-G-A-----CA---G-T-C-A-----G-A-G--G-TG--A-AA-GC--C-C-GG-G-G-----CT-C-AA-----C-C-C-C-G-G-A-A-C---G-G--C-C---T-T-----T-GA-T-A--C-----T-T-C-CG--G-T-C---T-T-G-A-G-T-T--C-GA---GA-G-A-----G-G-T-G--GG-T-----GG-A-ATT---C-C-G-A-GT--GT-A-G-AG-GT--G---A-A-A---TT-C-GT-AG--AT-A-TT--C-G--G-A-G-G-A-AC-A-CC--AG--T--G--GC-GAA-G--G-C-G-----G-C-C-C-A---CTG--G--CT-C-G-----A-C---A-C-T--GA--CG-C-T-G--A-GG--C-G-CG-A--AA-G-C---G-CG--GG-G--AG-C-A-AA-----CA--GG Bacteria(100);Proteobacteria(100);Alphaproteobacteria(100);unclassified(100);unclassified(100);unclassified(100);unclassified(100);unclassified(100);unclassified(100);  |   |   |   |   |   |   |   |   |   |   |   |   |    |   |    |    |   |   |   |   |   |   |   |   |   |   |   |
| Otu1601                                                                                                                                                                                                                                                                                                                                                                                                                                                                                                                                                                                                                                                                                                                                                                                                        | 0 | 0 | 0 | 0 | 0 | 0 | 0 | 0 | 0 | 0 | 0 | 0 | 0  | 0 | 0  | 0  | 0 | 0 | 0 | 0 | 0 | 0 | 0 | 0 | 0 | 0 | 0 |
|                                                                                                                                                                                                                                                                                                                                                                                                                                                                                                                                                                                                                                                                                                                                                                                                                | 0 | 0 | 0 | 0 | 0 | 0 | 0 | 0 | 0 | 0 | 0 | 0 | 0  | 0 | 0  | 0  | 0 | 0 | 0 | 0 | 0 | 0 | 0 | 0 | 0 | 0 | 0 |
|                                                                                                                                                                                                                                                                                                                                                                                                                                                                                                                                                                                                                                                                                                                                                                                                                | 0 | 0 | 0 | 0 | 0 | 0 | 0 | 0 | 0 | 0 | 0 | 0 | 0  | 0 | 2  | 0  | 0 | 0 | 0 | 0 | 0 | 0 | 0 | 0 | 0 | 0 | 0 |
|                                                                                                                                                                                                                                                                                                                                                                                                                                                                                                                                                                                                                                                                                                                                                                                                                | 0 | 0 | 0 | 0 | 0 | 0 | 0 | 0 | 0 | 0 | 0 | 0 | 15 | 0 | 0  | 0  | 0 | 0 | 0 | 0 | 0 | 0 | 0 | 0 | 0 | 0 | 0 |
| M02255_77_000000000-ADUT3_1_1101_18231_7711 T---AC---GT-AG-GAT-----CCG-A-G-----C-G-T---T-AT-C-CGG-AG-----TG-A-C-T--GG-GC-----GT--A---AA-GA-GTTGC-----G-TA-G-G-T-G-----G--T-TT-A-T-T-----AA---G-T-A-G-----G-T-G--A-TG--A-AA-GC--T-G-GT-G-G-----CT-C-AA-----C-C-A-T-TCA-G--A-T---T-G-T-T--A-T-----C-TA-A-A--C-----T-G-G--TA--A-A-C---T-T-G-A-G-A--G--T-AG---CA-G-A-----G-G-T-A--AC-T-----GG--A-ATT---T-C-T-A-GT--GT-A-G-GA-GT--G---A-A-A---TC-C-GT-AG--AT-A-TT--A-G--A-A-G-G-A-AC-A-CC--AA--T--G--GC-GTA-G--G-C-A-----G-G-T-T-A---CTG--G--GC-T-A-----T-T---T-C-T-GA-CA-C-T-A--A-GG--C-A-CG-A--AA-G-C---G-TG--GG-G--AG-C-G-AA-----CG--GG Bacteria(100);Candidate_division_TM7(100);unclassified(100);unclassified(100);unclassified(100);unclassified(100);unclassified(100);unclassified(100);unclassified(100); |   |   |   |   |   |   |   |   |   |   |   |   |    |   |    |    |   |   |   |   |   |   |   |   |   |   |   |
| Otu1602                                                                                                                                                                                                                                                                                                                                                                                                                                                                                                                                                                                                                                                                                                                                                                                                        | 0 | 0 | 0 | 0 | 0 | 0 | 0 | 0 | 0 | 0 | 0 | 0 | 0  | 0 | 0  | 0  | 0 | 0 | 0 | 0 | 0 | 0 | 0 | 0 | 0 | 0 | 0 |
|                                                                                                                                                                                                                                                                                                                                                                                                                                                                                                                                                                                                                                                                                                                                                                                                                | 0 | 0 | 0 | 0 | 0 | 0 | 0 | 0 | 0 | 0 | 0 | 0 | 0  | 0 | 0  | 0  | 0 | 0 | 0 | 0 | 0 | 0 | 0 | 0 | 0 | 0 | 0 |
|                                                                                                                                                                                                                                                                                                                                                                                                                                                                                                                                                                                                                                                                                                                                                                                                                | 0 | 0 | 0 | 0 | 0 | 0 | 0 | 0 | 0 | 0 | 0 | 0 | 0  | 0 | 0  | 67 | 0 | 0 | 0 | 0 | 0 | 0 | 0 | 0 | 0 | 0 | 0 |
|                                                                                                                                                                                                                                                                                                                                                                                                                                                                                                                                                                                                                                                                                                                                                                                                                | 0 | 0 | 0 | 0 | 0 | 0 | 0 | 0 | 0 | 0 | 0 | 0 | 0  | 0 | 0  | 0  | 0 | 0 | 0 | 0 | 0 | 0 | 0 | 0 | 0 | 0 | 0 |
| M02255_77_000000000-ADUT3_1_1105_24063_19483 T---AC---GT-AG-GGG-----GCA-A-G-----C-G-T---T-AT-C-CGG-AT-----TT-A--C-T--GG-GT-----GT--A---AA-GG-GA-GC-----G-TA-G-G-C-G-----G--C-AA-G-G-C-----AA---G-T-C-T-----G-A-T--G-TG--A-AA-AC--C-C-GG-G-G-----CT-C-AA-----C-C-C-C-G-G-G-A-A-C---T-G--C-A--T-T-----G--GA-A-A--C-----T-G-C-TT--A-G-C---T-A-G-A-G-T--G--T-CG---GA-G-A-----G-G-T-A--AG-T-----GG--A-ATT---C-C-T-A-GT--GT-A-G-CG-GT--G---A-A-A---TG-C-GT-AG--AT-A-TT--A-G--G-A-G-G-A-AC-A-CC--AG--T--G--GC-GAA-G--G-C-G-----A-C-T-T-A---CTG--G--AC-G-A-----T-A--A-C-T--GA--CG-C-T-G--A-GG--C-T-CG-A--AA-G-C---G-TG--GG-G--AG-C-A-AA-----CA--GG Bacteria(100);Firmicutes(100);Clostridia(100);Clostridiales(100);Lachnospiraceae(100);unclassified(100);unclassified(100);unclassified(100);unclassified(100);      |   |   |   |   |   |   |   |   |   |   |   |   |    |   |    |    |   |   |   |   |   |   |   |   |   |   |   |
| Otu1603                                                                                                                                                                                                                                                                                                                                                                                                                                                                                                                                                                                                                                                                                                                                                                                                        | 0 | 0 | 0 | 0 | 0 | 0 | 0 | 0 | 0 | 0 | 0 | 0 | 0  | 0 | 0  | 0  | 0 | 0 | 0 | 0 | 0 | 0 | 0 | 0 | 0 | 0 | 0 |
|                                                                                                                                                                                                                                                                                                                                                                                                                                                                                                                                                                                                                                                                                                                                                                                                                | 0 | 0 | 0 | 0 | 0 | 0 | 0 | 0 | 0 | 0 | 0 | 0 | 0  | 0 | 0  | 0  | 0 | 0 | 0 | 0 | 0 | 0 | 0 | 0 | 0 | 0 | 0 |
|                                                                                                                                                                                                                                                                                                                                                                                                                                                                                                                                                                                                                                                                                                                                                                                                                | 0 | 0 | 0 | 0 | 0 | 0 | 0 | 0 | 0 | 0 | 0 | 0 | 0  | 0 | 0  | 20 | 0 | 0 | 0 | 0 | 0 | 0 | 0 | 0 | 0 | 0 | 0 |
|                                                                                                                                                                                                                                                                                                                                                                                                                                                                                                                                                                                                                                                                                                                                                                                                                | 0 | 0 | 0 | 0 | 0 | 0 | 0 | 0 | 0 | 0 | 0 | 0 | 0  | 0 | 0  | 0  | 0 | 0 | 0 | 0 | 0 | 0 | 0 | 0 | 0 | 0 | 0 |
| M02255_77_000000000-ADUT3_1_1107_14182_18275 T---AC---GT-AT-GGA-----GCA-A-G-----C-G-T---T-AT-C-CGG-AT-----TT-A--C-T--GG-GT-----GT--A---AA-GG-GA-GC-----G-TA-G-A-C-G-----G--A-TT-T-G-C-----AA---G-T-C-T                                                                                                                                                                                                                                                                                                                                                                                                                                                                                                                                                                                                         |   |   |   |   |   |   |   |   |   |   |   |   |    |   |    |    |   |   |   |   |   |   |   |   |   |   |   |



|                                                                                                                                                                                                                                                                                                                                                                                                                                                                                                                                                                                                                                                                                                                                                                                                                                                          |   |   |   |   |   |   |   |   |   |   |    |   |   |   |   |    |   |   |   |   |   |   |   |   |   |   |   |
|----------------------------------------------------------------------------------------------------------------------------------------------------------------------------------------------------------------------------------------------------------------------------------------------------------------------------------------------------------------------------------------------------------------------------------------------------------------------------------------------------------------------------------------------------------------------------------------------------------------------------------------------------------------------------------------------------------------------------------------------------------------------------------------------------------------------------------------------------------|---|---|---|---|---|---|---|---|---|---|----|---|---|---|---|----|---|---|---|---|---|---|---|---|---|---|---|
| Otu1605                                                                                                                                                                                                                                                                                                                                                                                                                                                                                                                                                                                                                                                                                                                                                                                                                                                  | 0 | 0 | 0 | 0 | 0 | 0 | 0 | 0 | 0 | 0 | 0  | 0 | 0 | 0 | 0 | 0  | 0 | 0 | 0 | 0 | 0 | 0 | 0 | 0 | 0 | 0 | 0 |
|                                                                                                                                                                                                                                                                                                                                                                                                                                                                                                                                                                                                                                                                                                                                                                                                                                                          | 0 | 0 | 0 | 0 | 0 | 0 | 0 | 0 | 0 | 0 | 0  | 0 | 0 | 0 | 0 | 0  | 0 | 0 | 0 | 0 | 0 | 0 | 0 | 0 | 0 | 0 | 0 |
|                                                                                                                                                                                                                                                                                                                                                                                                                                                                                                                                                                                                                                                                                                                                                                                                                                                          | 0 | 0 | 0 | 0 | 0 | 0 | 0 | 0 | 0 | 0 | 0  | 0 | 0 | 1 | 0 | 0  | 0 | 0 | 0 | 0 | 0 | 0 | 0 | 0 | 0 | 0 | 0 |
|                                                                                                                                                                                                                                                                                                                                                                                                                                                                                                                                                                                                                                                                                                                                                                                                                                                          | 0 | 0 | 0 | 0 | 0 | 0 | 0 | 0 | 0 | 0 | 60 | 0 | 0 | 0 | 0 | 0  | 0 | 0 | 0 | 0 | 0 | 0 | 0 | 0 | 0 | 0 |   |
| M02255_77_000000000-ADUT3_1_1111_25165_4428 T---AC---GG-AG-GGT-----GCA-A-G-----C--G--T---T--AC-T-CGG-AA-----TC-A--C-T--GG-GC-----GT--A----AA-GG-GT-GC-----G-TA-G-G-T-G-----G--A-TT-A-T-C-----AA-<br>---G-T-C-T-----C-T-T--G--TG--A-AA-TC--T-A-AT-A-G----CT-T-AA-----C-T-A-T-T-A-A--A-T---T-G--C-T---T--G-----G--GA-A-A--C-----T--G-A--TA-G-T-C---T-A-G-A-G-T--A---G-GG----GA-G-A-----G-G-C-A---GA-T-----GG--A--ACT---C-T-T-G-<br>GT--GT-A-G-GA-GT--A---A--A---TC-C-GT-AG--AT-A-TC--A-A--G-A-A-G-A-AT-A-CC---TA--T--T--GC-GAA-A--G-C--G-----A--T-C-T-G---CTA--G--AA-C-C-----T-A--A-C-T--GA--CA-C-T-G--A-TG--C-A-CG-A--AA-G-C---G-TG--GG-G--AG-C-<br>A-AA-----CA--GG Bacteria(100);Proteobacteria(100);Epsilonproteobacteria(100);Campylobacterales(100);Campylobacteraceae(100);Campylobacter(100);unclassified(100);unclassified(100);unclassified(100); |   |   |   |   |   |   |   |   |   |   |    |   |   |   |   |    |   |   |   |   |   |   |   |   |   |   |   |
| Otu1606                                                                                                                                                                                                                                                                                                                                                                                                                                                                                                                                                                                                                                                                                                                                                                                                                                                  | 0 | 0 | 0 | 0 | 0 | 0 | 0 | 0 | 0 | 0 | 0  | 0 | 0 | 0 | 0 | 0  | 0 | 0 | 0 | 0 | 0 | 0 | 0 | 0 | 0 | 0 | 0 |
|                                                                                                                                                                                                                                                                                                                                                                                                                                                                                                                                                                                                                                                                                                                                                                                                                                                          | 0 | 0 | 0 | 0 | 0 | 0 | 0 | 0 | 0 | 0 | 0  | 0 | 0 | 0 | 0 | 0  | 0 | 0 | 0 | 0 | 0 | 0 | 0 | 0 | 0 | 0 | 0 |
|                                                                                                                                                                                                                                                                                                                                                                                                                                                                                                                                                                                                                                                                                                                                                                                                                                                          | 0 | 0 | 0 | 0 | 0 | 0 | 0 | 0 | 0 | 0 | 0  | 0 | 0 | 0 | 0 | 20 | 0 | 0 | 0 | 0 | 0 | 0 | 0 | 0 | 0 | 0 | 0 |
|                                                                                                                                                                                                                                                                                                                                                                                                                                                                                                                                                                                                                                                                                                                                                                                                                                                          | 0 | 0 | 0 | 0 | 0 | 0 | 0 | 0 | 0 | 0 | 0  | 0 | 0 | 0 | 0 | 0  | 0 | 0 | 0 | 0 | 0 | 0 | 0 | 0 | 0 | 0 |   |
| M02255_77_000000000-ADUT3_1_1113_18487_10182 T---AC---GT-AG-GGG-----GCA-A-G-----C--G--T---T--AT-C-CGG-AT-----TT-A--C-T--GG-GT-----GT--A----AA-GG-GA-GC-----G-TA-G-A-C-G-----G--T-AT-G-G-T-----<br>-----AA---G-T-C-A-----G-A-T--G--TG--A-AA-GC--C-C-GG-A-G----CT-C-AA-----C-T-C-C-G-G-G--A-C---T-G--C-A--T--T-----T--GA-A-A--C-----T--A-T--CA--G-A-C---T-A-G-A-G-T--G---C-AG----GA-G-A-----G-G-T-A--AG-T-----GG--A--ATT---C-<br>C-T-A-GT--GT-A-G-CG-GT--G---A--A---TG-C-GT-AG--AT-A-TT--A-G--G-A-G-G-A-AC-A-CC---AG--T--G--GC-GAA-G--G-C--G-----G--C-T-T-A---CTG--G--AC-T-G-----T-A--A-C-T--GA--CG-T-T-G--A-GG--C-T-CG-A--AA-G-C---G-TG--GG-G-<br>-AG-C-A-AA-----CA--GG Bacteria(100);Firmicutes(100);Clostridia(100);Clostridiales(100);Lachnospiraceae(100);unclassified(100);unclassified(100);unclassified(100);unclassified(100);                    |   |   |   |   |   |   |   |   |   |   |    |   |   |   |   |    |   |   |   |   |   |   |   |   |   |   |   |
| Otu1607                                                                                                                                                                                                                                                                                                                                                                                                                                                                                                                                                                                                                                                                                                                                                                                                                                                  | 0 | 0 | 0 | 0 | 0 | 0 | 0 | 0 | 0 | 0 | 0  | 0 | 0 | 0 | 0 | 0  | 0 | 0 | 0 | 0 | 0 | 0 | 0 | 0 | 0 | 0 | 0 |
|                                                                                                                                                                                                                                                                                                                                                                                                                                                                                                                                                                                                                                                                                                                                                                                                                                                          | 0 | 0 | 0 | 0 | 0 | 0 | 0 | 0 | 0 | 0 | 0  | 0 | 0 | 0 | 0 | 0  | 0 | 0 | 0 | 0 | 0 | 0 | 0 | 0 | 0 | 0 | 0 |
|                                                                                                                                                                                                                                                                                                                                                                                                                                                                                                                                                                                                                                                                                                                                                                                                                                                          | 0 | 0 | 0 | 0 | 0 | 0 | 0 | 0 | 0 | 0 | 0  | 0 | 0 | 0 | 0 | 15 | 0 | 0 | 0 | 0 | 0 | 0 | 0 | 0 | 0 | 0 | 0 |
|                                                                                                                                                                                                                                                                                                                                                                                                                                                                                                                                                                                                                                                                                                                                                                                                                                                          | 0 | 0 | 0 | 0 | 0 | 0 | 0 | 0 | 0 | 0 | 0  | 0 | 0 | 0 | 0 | 0  | 0 | 0 | 0 | 0 | 0 | 0 | 0 | 0 | 0 | 0 |   |
| M02255_77_000000000-ADUT3_1_1119_18640_20364 T---AC---GT-AT-GGA-----GCA-A-G-----C--G--T---T--AT-C-CGG-AT-----TT-A--C-T--GG-GT-----GT--A----AA-GG-GT-GC-----G-TA-G-G-C-G-----G--C-AT-G-G-C-----<br>-----AA---G-T-C-A-----G-A-A--G--TG--A-AA-GC--C-C-GG-G-G----CT-C-AA-----C-C-C-C-G-G-T--A-G---T-G--C-T---T--T-----T--GA-A-A--C-----T--G-C--TG--A-G-C---T-T-G-A-G-T--A---C-GG----GA-G-A-----G-G-T-A--AG-C-----GG--A--ATT---<br>C-C-T-A-GT--GT-A-G-CG-GT--G---A--A---TG-C-GT-AG--AT-A-TT--A-G--G-A-G-G-A-AC-A-CC---AG--T--G--GC-GAA-G--G-C--G-----G--C-T-T-A---CTG--G--AC-C-G-----T-A--A-C-T--GA--CG-C-T-G--A-GG--C-A-CG-A--AA-G-C---G-TG--GG-<br>G--AG-C-A-AA-----CA--GG Bacteria(100);Firmicutes(100);Clostridia(100);Clostridiales(100);Lachnospiraceae(100);unclassified(100);unclassified(100);unclassified(100);unclassified(100);                   |   |   |   |   |   |   |   |   |   |   |    |   |   |   |   |    |   |   |   |   |   |   |   |   |   |   |   |
| Otu1608                                                                                                                                                                                                                                                                                                                                                                                                                                                                                                                                                                                                                                                                                                                                                                                                                                                  | 0 | 0 | 0 | 0 | 0 | 0 | 0 | 0 | 0 | 0 | 0  | 0 | 0 | 0 | 0 | 0  | 0 | 0 | 0 | 0 | 0 | 0 | 0 | 0 | 0 | 0 | 0 |
|                                                                                                                                                                                                                                                                                                                                                                                                                                                                                                                                                                                                                                                                                                                                                                                                                                                          | 0 | 0 | 0 | 0 | 0 | 0 | 0 | 0 | 0 | 0 | 0  | 0 | 0 | 0 | 0 | 0  | 0 | 0 | 0 | 0 | 0 | 0 | 0 | 0 | 0 | 0 | 0 |
|                                                                                                                                                                                                                                                                                                                                                                                                                                                                                                                                                                                                                                                                                                                                                                                                                                                          | 0 | 0 | 0 | 0 | 0 | 0 | 0 | 0 | 0 | 0 | 0  | 0 | 0 | 0 | 0 | 24 | 0 | 0 | 0 | 0 | 0 | 0 | 0 | 0 | 0 | 0 | 0 |
|                                                                                                                                                                                                                                                                                                                                                                                                                                                                                                                                                                                                                                                                                                                                                                                                                                                          | 0 | 0 | 0 | 0 | 0 | 0 | 0 | 0 | 0 | 0 | 0  | 0 | 0 | 0 | 0 | 0  | 0 | 0 | 0 | 0 | 0 | 0 | 0 | 0 | 0 | 0 |   |
| M02255_77_000000000-ADUT3_1_2114_21990_16470 T---AC---GT-AG-GGG-----GCA-A-G-----C--G--T---T--AT-C-CGG-AT-----TC-A--T-T--GG-GC-----GT--A----AA-GA-GC-GC-----G-TA-G-G-C-G-----G--A-TG-T-T-T-----<br>-----AA---G-C-A-G-----A-A-T--C--TC--T-AA-TC--T-G-AG-G-G----CT-C-AA-----C-C-C-C-C-A-G--C-----C-G--G-A--T--T-----C--TG-A-A--C-----T--G-G--AT--G-T-C---T-C-G-A-G-T--T---T-GG----TA-G-A-----G-G-A-A--GA-T-----GG--A--ATT---C-<br>C-C-G-GT--GT-A-G-CG-GT--G---G--A-A---TG-C-GC-AG--AT-A-TC--G-G--G-A-A-G-A-AC-A-CC---GA--T--G--GC-GAA-G--G-C-A-----G--T-C-T-T---CTG--G--GC-C-A-----T-A--A-C-T--GA--CG-C-T-G--A-GG--C-G-CG-A--AA-G-C---T-AG--GG-<br>G--AG-C-A-AA-----CA--GG Bacteria(100);unclassified(100);unclassified(100);unclassified(100);unclassified(100);unclassified(100);unclassified(100);unclassified(100);unclassified(100);                   |   |   |   |   |   |   |   |   |   |   |    |   |   |   |   |    |   |   |   |   |   |   |   |   |   |   |   |
| Otu1609                                                                                                                                                                                                                                                                                                                                                                                                                                                                                                                                                                                                                                                                                                                                                                                                                                                  | 0 | 0 | 0 | 0 | 0 | 0 | 0 | 0 | 0 | 0 | 0  | 0 | 0 | 0 | 0 | 0  | 0 | 0 | 0 | 0 | 0 | 0 | 0 | 0 | 0 | 0 | 0 |
|                                                                                                                                                                                                                                                                                                                                                                                                                                                                                                                                                                                                                                                                                                                                                                                                                                                          | 0 | 0 | 0 | 0 | 0 | 0 | 0 | 0 | 0 | 0 | 0  | 0 | 0 | 0 | 0 | 0  | 0 | 0 | 0 | 0 | 0 | 0 | 0 | 0 | 0 | 0 | 0 |
|                                                                                                                                                                                                                                                                                                                                                                                                                                                                                                                                                                                                                                                                                                                                                                                                                                                          | 0 | 0 | 0 | 0 | 0 | 0 | 0 | 0 | 0 | 0 | 0  | 0 | 0 | 0 | 0 | 24 | 0 | 0 | 0 | 0 | 0 | 0 | 0 | 0 | 0 | 0 | 0 |
|                                                                                                                                                                                                                                                                                                                                                                                                                                                                                                                                                                                                                                                                                                                                                                                                                                                          | 0 | 0 | 0 | 0 | 0 | 0 | 0 | 0 | 0 | 0 | 0  | 0 | 0 | 0 | 0 | 0  | 0 | 0 | 0 | 0 | 0 | 0 | 0 | 0 | 0 | 0 |   |
| M02255_77_000000000-ADUT3_1_1105_10523_10873 T---AC---GT-AG-GGG-----GCA-A-G-----C--G--T---T--AT-C-CGG-AT-----TT-A--C-T--GG-GT-----GT--A----AA-GG-GA-GC-----G-TA-G-G-C-G-----G--T-GA-T-G-C-----<br>-----AA---G-T-C-A-----G-A-A--G--TG--A-AA-AC--C-C-GG-G-G----CT-C-AA-----C-C-C-C-GCG-G--A-T---T-G--C-T---T--T-----T--GA-G-A--C-----T--G-T--GT--T-G-C---T-G-G-A-G-T--A---C-AG----GA-G-G-----G-G-C-A---GG-C-----GG--A--ATT---C-<br>C-C-T-G-GT--GT-A-G-CG-GT--G---A--A---TG-C-GT-AG--AT-A-TC--A-G--G-A-G-G-A-AC-A-CC---GG--T--G--GC-GAA-G--G-C--G-----G--C-C-T-G---CTG--G--AC-T-G-----T-A--A-C-T--GA--CG-C-T-G--A-GG--C-T-CG-A--AG-G-C---G-TG--<br>GG-G--AG-C-A-AA-----CA--GG Bacteria(100);Firmicutes(100);Clostridia(100);Clostridiales(100);Lachnospiraceae(100);unclassified(100);unclassified(100);unclassified(100);unclassified(100);                |   |   |   |   |   |   |   |   |   |   |    |   |   |   |   |    |   |   |   |   |   |   |   |   |   |   |   |



|                                                                                                                                                                                                                                                                                                                                                                                                                                                                                                                                                                                                           |    |   |   |   |   |   |   |   |   |   |   |   |   |    |   |    |   |   |   |   |   |   |   |   |   |   |   |
|-----------------------------------------------------------------------------------------------------------------------------------------------------------------------------------------------------------------------------------------------------------------------------------------------------------------------------------------------------------------------------------------------------------------------------------------------------------------------------------------------------------------------------------------------------------------------------------------------------------|----|---|---|---|---|---|---|---|---|---|---|---|---|----|---|----|---|---|---|---|---|---|---|---|---|---|---|
| Otu1610                                                                                                                                                                                                                                                                                                                                                                                                                                                                                                                                                                                                   | 0  | 0 | 0 | 0 | 0 | 0 | 0 | 0 | 0 | 0 | 0 | 0 | 0 | 0  | 0 | 0  | 0 | 0 | 0 | 0 | 0 | 0 | 0 | 0 | 0 | 0 | 0 |
|                                                                                                                                                                                                                                                                                                                                                                                                                                                                                                                                                                                                           | 0  | 0 | 0 | 0 | 0 | 0 | 0 | 0 | 0 | 0 | 0 | 0 | 0 | 0  | 0 | 0  | 0 | 0 | 0 | 0 | 0 | 0 | 0 | 0 | 0 | 0 | 0 |
|                                                                                                                                                                                                                                                                                                                                                                                                                                                                                                                                                                                                           | 0  | 0 | 0 | 0 | 0 | 0 | 0 | 0 | 0 | 0 | 0 | 0 | 0 | 0  | 0 | 14 | 0 | 0 | 0 | 0 | 0 | 0 | 0 | 0 | 0 | 0 | 0 |
|                                                                                                                                                                                                                                                                                                                                                                                                                                                                                                                                                                                                           | 0  | 0 | 0 | 0 | 0 | 0 | 0 | 0 | 0 | 0 | 0 | 0 | 0 | 0  | 0 | 0  | 0 | 0 | 0 | 0 | 0 | 0 | 0 | 0 | 0 |   |   |
| M02255_77_000000000-ADUT3_1_2102_18863_17666                                                                                                                                                                                                                                                                                                                                                                                                                                                                                                                                                              |    |   |   |   |   |   |   |   |   |   |   |   |   |    |   |    |   |   |   |   |   |   |   |   |   |   |   |
| T---AC---GT-AG-GGG-----GCA-A-G-----C-G-T---T-GT-C-CGG-AA-----TG-A-T-T-GG-GC-----GT-A---AA-GG-GC-GC-----G-TA-G-G-C-G-----G-C-TT-T-A-T-----AA---G-T-C-T-----G-G-A-G-TG--A-AA-GT--C-C-TC-T-T----TT-C-AA-----G-G-G-A-G-G-A-A-T---T-G-C-T---T-T-----G--GA-A-A---C-----T-A-T-AG--A-G-C---T-T-G-A-G-T-G--C-AG----GA-G-A-----G-G-T-T---AT-C-----GG--A--ATT---C-C-C-G-GT--GT-A-G-CG-GT--G---A--A-A---TG-C-GT-AG--AT-A-TC--G-G--G-A-G-G-A-AC-A-TC---GG-T--G--GC-GAA-G--G-C--G-----G--G-T-A-A---CTG--G--AC-T-G-----C-A---A-C-T-GA--CG-C-T-G--A-GG--C-G-CG-A--AA-G-T---G-TG--GG-G--AG-C-A-AA-----CA--GG               |    |   |   |   |   |   |   |   |   |   |   |   |   |    |   |    |   |   |   |   |   |   |   |   |   |   |   |
| Bacteria(100);unclassified(100);unclassified(100);unclassified(100);unclassified(100);unclassified(100);unclassified(100);unclassified(100);unclassified(100);                                                                                                                                                                                                                                                                                                                                                                                                                                            |    |   |   |   |   |   |   |   |   |   |   |   |   |    |   |    |   |   |   |   |   |   |   |   |   |   |   |
| Otu1611                                                                                                                                                                                                                                                                                                                                                                                                                                                                                                                                                                                                   | 0  | 0 | 0 | 0 | 0 | 0 | 0 | 0 | 0 | 0 | 0 | 0 | 0 | 0  | 0 | 0  | 0 | 0 | 0 | 0 | 0 | 0 | 0 | 0 | 0 | 0 | 0 |
|                                                                                                                                                                                                                                                                                                                                                                                                                                                                                                                                                                                                           | 0  | 0 | 0 | 0 | 0 | 0 | 0 | 0 | 0 | 0 | 0 | 0 | 0 | 0  | 0 | 0  | 0 | 0 | 0 | 0 | 0 | 0 | 0 | 0 | 0 | 0 | 0 |
|                                                                                                                                                                                                                                                                                                                                                                                                                                                                                                                                                                                                           | 0  | 0 | 0 | 0 | 0 | 0 | 0 | 0 | 0 | 0 | 0 | 0 | 0 | 0  | 0 | 5  | 6 | 0 | 0 | 0 | 0 | 0 | 0 | 0 | 0 | 0 | 0 |
|                                                                                                                                                                                                                                                                                                                                                                                                                                                                                                                                                                                                           | 0  | 0 | 0 | 0 | 0 | 0 | 0 | 0 | 0 | 0 | 0 | 0 | 0 | 0  | 0 | 0  | 0 | 0 | 0 | 0 | 0 | 0 | 0 | 0 | 0 | 0 | 0 |
| M02255_77_000000000-ADUT3_1_2118_11161_13835                                                                                                                                                                                                                                                                                                                                                                                                                                                                                                                                                              |    |   |   |   |   |   |   |   |   |   |   |   |   |    |   |    |   |   |   |   |   |   |   |   |   |   |   |
| T---AC---GT-AG-GGT-----GCG-A-G-----C-G-T---T-GT-C-CGG-AA-----TT-A-T-T-GG-GC-----GT-A---AA-GA-GC-TT-----G-TA-G-G-C-G-----G--T-TT-G-T-C-----GC---G-T-C-T-----G-C-T-G--TG--A-AA-AC--T-C-GG-G-G----CT-T-AA-----C-C-C-C-G-A-G-C-C---T-G-C-A---G-T-----G--GG-T-A---C-----G-G-G-CA--G-A-C---T-A-G-A-G-T-A---T-GG----TA-G-G-----G-G-A-G---AC-T-----GG--A--ATT---C-C-T-G-GT--GT-A-G-CG-GT--G---G--A-A---TG-C-GC-AG--AT-A-TC--A-G--G-A-G-G-A-AC-A-CC---GA--T--G--GC-GAA-G--G-C-A-----G--G-T-C-T---CTG--G--GC-C-A-----T-A---A-C-T-GA--CG-C-T-G--A-GA--A-G-CG-A--AA-G-C---G-TG--GG-T--AG-C-G-AA-----CA--GG            |    |   |   |   |   |   |   |   |   |   |   |   |   |    |   |    |   |   |   |   |   |   |   |   |   |   |   |
| Bacteria(100);Actinobacteria(100);Actinobacteria(100);Actinobacteridae(100);Actinomycetales(100);Micrococcineae(100);Intrasporangiaceae(100);Ornithinicoccus(100);unclassified(100);                                                                                                                                                                                                                                                                                                                                                                                                                      |    |   |   |   |   |   |   |   |   |   |   |   |   |    |   |    |   |   |   |   |   |   |   |   |   |   |   |
| Otu1612                                                                                                                                                                                                                                                                                                                                                                                                                                                                                                                                                                                                   | 0  | 0 | 0 | 0 | 0 | 0 | 0 | 0 | 0 | 0 | 0 | 0 | 0 | 0  | 0 | 0  | 0 | 0 | 0 | 0 | 0 | 0 | 0 | 0 | 0 | 0 | 0 |
|                                                                                                                                                                                                                                                                                                                                                                                                                                                                                                                                                                                                           | 0  | 0 | 0 | 0 | 0 | 0 | 0 | 0 | 0 | 0 | 0 | 0 | 0 | 0  | 0 | 0  | 0 | 0 | 0 | 0 | 0 | 0 | 0 | 0 | 0 | 0 | 0 |
|                                                                                                                                                                                                                                                                                                                                                                                                                                                                                                                                                                                                           | 0  | 0 | 0 | 0 | 0 | 0 | 0 | 0 | 0 | 0 | 0 | 0 | 0 | 0  | 0 | 7  | 0 | 0 | 0 | 0 | 0 | 0 | 0 | 0 | 0 | 0 | 0 |
|                                                                                                                                                                                                                                                                                                                                                                                                                                                                                                                                                                                                           | 14 | 0 | 0 | 0 | 0 | 0 | 0 | 0 | 0 | 0 | 0 | 0 | 0 | 0  | 0 | 0  | 0 | 0 | 0 | 0 | 0 | 0 | 0 | 0 | 0 | 0 | 0 |
| M02255_77_000000000-ADUT3_1_1102_21140_10770                                                                                                                                                                                                                                                                                                                                                                                                                                                                                                                                                              |    |   |   |   |   |   |   |   |   |   |   |   |   |    |   |    |   |   |   |   |   |   |   |   |   |   |   |
| T---AC---GT-AG-GGT-----GCA-A-G-----C-A-T---T-AT-C-CGG-AG-----TG-A-C-T--GG-GC-----GT-A---AA-GA-GTTGC-----G-TA-G-G-T-G-----G--T-CA-G-T-A-----AA---G-T-G-A-----A-T-A-G--TG--A-AA-TC--T-G-GT-G-G----CT-C-AA-----C-C-A-T-TCA-G--G-C---T-A--T-T---A-T-----T--CA-A-A---C-----T--C-A-CT--G-A-C---T-C-G-A-G-A-A---T-AG----CA-G-A-----G-G-T-A---AC-T-----GG--A--ATT---T-C-T-T-GT--GT-A-G-GA-GT--G---A--A-A---TC-C-GT-AG--AT-A-TA--A-G--A-A-G-G-A-AC-A-CC---AA--T--G--GC-GTA-G--G-C-A-----G--G-T-T-A---CTG--G--GC-T-A-----T-T---T-C-T-GA--CA-C-T-G--A-GG--C-A-CG-A--AA-G-C---G-TG--GG-G--AG-C-G-AA-----CG--GG        |    |   |   |   |   |   |   |   |   |   |   |   |   |    |   |    |   |   |   |   |   |   |   |   |   |   |   |
| Bacteria(100);Candidate_division_TM7(100);unclassified(100);unclassified(100);unclassified(100);unclassified(100);unclassified(100);unclassified(100);unclassified(100);                                                                                                                                                                                                                                                                                                                                                                                                                                  |    |   |   |   |   |   |   |   |   |   |   |   |   |    |   |    |   |   |   |   |   |   |   |   |   |   |   |
| Otu1613                                                                                                                                                                                                                                                                                                                                                                                                                                                                                                                                                                                                   | 0  | 0 | 0 | 0 | 0 | 0 | 0 | 0 | 0 | 0 | 0 | 0 | 0 | 0  | 0 | 0  | 0 | 0 | 0 | 0 | 0 | 0 | 0 | 0 | 0 | 0 | 0 |
|                                                                                                                                                                                                                                                                                                                                                                                                                                                                                                                                                                                                           | 0  | 0 | 0 | 0 | 0 | 0 | 0 | 0 | 0 | 0 | 0 | 0 | 0 | 0  | 0 | 0  | 0 | 0 | 0 | 0 | 0 | 0 | 0 | 0 | 0 | 0 | 0 |
|                                                                                                                                                                                                                                                                                                                                                                                                                                                                                                                                                                                                           | 0  | 0 | 0 | 0 | 0 | 0 | 0 | 0 | 0 | 0 | 0 | 0 | 0 | 0  | 0 | 0  | 0 | 0 | 0 | 0 | 0 | 0 | 0 | 0 | 0 | 5 | 0 |
|                                                                                                                                                                                                                                                                                                                                                                                                                                                                                                                                                                                                           | 0  | 0 | 0 | 0 | 0 | 1 | 0 | 0 | 0 | 0 | 0 | 0 | 0 | 0  | 9 | 0  | 0 | 0 | 0 | 0 | 0 | 0 | 0 | 0 | 0 | 0 | 0 |
| M02255_76_000000000-ADUNE_1_1112_5487_15700                                                                                                                                                                                                                                                                                                                                                                                                                                                                                                                                                               |    |   |   |   |   |   |   |   |   |   |   |   |   |    |   |    |   |   |   |   |   |   |   |   |   |   |   |
| C---GG---CT-AA-CTC-----CGT-G-C-----C-A-G---C--AG-C-CGC-GG-----TA-A-T-A--CG-GA-----GG--G---TG-CA-AG-CG-----T-TA-T-C-C-G-----G--G-TT-A-T-T-----AA--G-T-C-A-----G-T-G--G--TG--A-AA-TC--T-C-AT-A-G----CT-C-AA-----C-T-A-T-G-A-A--A-C---T-G--C-C---A-T-----T--GA-T-A---C-----T--G-A-TA--G-T-C---T-T-G-A-G-T--A---T-AT-----TT-G-A-----A-G-T-A---GC-T-----GG--A--ATA---A-G-T-A-GT--GT-A-G-CG-GT--G---A--A-A---TG-C-AT-AG--AT-A-TT--A-C--T-T-A-G-A-AC-A-CC---AA--T--A--GC-GAA-G--G-C-A-----G--G-T-T-A---CTA--A--GA-T-A-----T-T---A-C-T-GA--CG-C-T-G--A-GG--G-A-CG-A--GA-G-C---G-TA--GG-G--AG-C-G-AA-----CA--GG    |    |   |   |   |   |   |   |   |   |   |   |   |   |    |   |    |   |   |   |   |   |   |   |   |   |   |   |
| Bacteria(100);Bacteroidetes(100);Flavobacteria(100);Flavobacteriales(100);Flavobacteriaceae(100);unclassified(100);unclassified(100);unclassified(100);unclassified(100);                                                                                                                                                                                                                                                                                                                                                                                                                                 |    |   |   |   |   |   |   |   |   |   |   |   |   |    |   |    |   |   |   |   |   |   |   |   |   |   |   |
| Otu1614                                                                                                                                                                                                                                                                                                                                                                                                                                                                                                                                                                                                   | 0  | 0 | 0 | 0 | 0 | 0 | 0 | 0 | 0 | 0 | 0 | 0 | 0 | 0  | 0 | 0  | 0 | 0 | 0 | 0 | 0 | 0 | 0 | 0 | 0 | 0 | 0 |
|                                                                                                                                                                                                                                                                                                                                                                                                                                                                                                                                                                                                           | 0  | 0 | 0 | 0 | 0 | 0 | 0 | 0 | 0 | 0 | 0 | 0 | 0 | 0  | 0 | 0  | 0 | 0 | 0 | 0 | 0 | 0 | 0 | 0 | 0 | 0 | 0 |
|                                                                                                                                                                                                                                                                                                                                                                                                                                                                                                                                                                                                           | 0  | 0 | 0 | 0 | 0 | 0 | 0 | 0 | 0 | 0 | 0 | 0 | 0 | 19 | 0 | 0  | 0 | 0 | 0 | 0 | 0 | 0 | 0 | 0 | 0 | 0 | 0 |
|                                                                                                                                                                                                                                                                                                                                                                                                                                                                                                                                                                                                           | 0  | 0 | 0 | 0 | 0 | 0 | 0 | 0 | 0 | 0 | 0 | 0 | 0 | 0  | 0 | 0  | 0 | 0 | 0 | 0 | 0 | 0 | 0 | 0 | 0 | 0 | 0 |
| M02255_77_000000000-ADUT3_1_2113_16331_14533                                                                                                                                                                                                                                                                                                                                                                                                                                                                                                                                                              |    |   |   |   |   |   |   |   |   |   |   |   |   |    |   |    |   |   |   |   |   |   |   |   |   |   |   |
| T---AC---GA-AG-GGG-----GCA-A-G-----C--G--T---T-GT-T-CGG-AA-----TG-A-C-T--GG-GC-----GT--A---AA-GG-GC-GC-----G-TA-G-G-C-G-----G--T-TC-G-T-T-----GC---G-T-C-A-----G-A-T--G--TG--A-AA-GC--C-C-CG-G-G----CT-C-AA-----C-C-T-G-G-G-A-A-C---T-G--C-A---T-T-----T--GA-T-A---C-----G--G-G--CG--A-G-C---T-T-G-A-A-T--C---C-AA-----GA-G-A-----G-G-G-T---GG-T-----GG--A--ATT---C-C-C-A-GT--GT-A-G-AG-GT--G---A--A-A---TT-C-GT-AG--AT-A-TT--G-G--G-A-A-G-A-AC-A-CC---AG--T--G--GC-GAA-G--G-C--G-----G--C-C-A-C---CTG--G--CT-T-G-----G-T---A-T-T-GA--CG-C-T-G--A-GG--C-G-CG-A--AA-G-C---G-TG--GG-G--AG-C-A-AA-----CA--GG |    |   |   |   |   |   |   |   |   |   |   |   |   |    |   |    |   |   |   |   |   |   |   |   |   |   |   |
| Bacteria(100);Proteobacteria(100);Alphaproteobacteria(100);Rhodospirillales(100);Rhodospirillaceae(100);unclassified(100);unclassified(100);unclassified(100);unclassified(100);                                                                                                                                                                                                                                                                                                                                                                                                                          |    |   |   |   |   |   |   |   |   |   |   |   |   |    |   |    |   |   |   |   |   |   |   |   |   |   |   |



|                                                                                                                                                                                                                                                                                                                                                                                                                                                                                                                                                                                                                                          |   |   |   |   |   |   |   |   |    |   |   |   |   |    |    |   |   |   |   |   |   |   |   |   |   |   |   |
|------------------------------------------------------------------------------------------------------------------------------------------------------------------------------------------------------------------------------------------------------------------------------------------------------------------------------------------------------------------------------------------------------------------------------------------------------------------------------------------------------------------------------------------------------------------------------------------------------------------------------------------|---|---|---|---|---|---|---|---|----|---|---|---|---|----|----|---|---|---|---|---|---|---|---|---|---|---|---|
| Otu1615                                                                                                                                                                                                                                                                                                                                                                                                                                                                                                                                                                                                                                  | 0 | 0 | 0 | 0 | 0 | 0 | 0 | 0 | 0  | 0 | 0 | 0 | 0 | 0  | 0  | 0 | 0 | 0 | 0 | 0 | 0 | 0 | 0 | 0 | 0 | 0 | 0 |
|                                                                                                                                                                                                                                                                                                                                                                                                                                                                                                                                                                                                                                          | 0 | 0 | 0 | 0 | 0 | 0 | 0 | 0 | 0  | 0 | 0 | 0 | 0 | 0  | 0  | 0 | 0 | 0 | 0 | 0 | 0 | 0 | 0 | 0 | 0 | 0 | 0 |
|                                                                                                                                                                                                                                                                                                                                                                                                                                                                                                                                                                                                                                          | 0 | 0 | 0 | 0 | 0 | 0 | 0 | 0 | 0  | 0 | 0 | 0 | 0 | 8  | 9  | 0 | 0 | 0 | 0 | 0 | 0 | 0 | 0 | 0 | 0 | 0 | 0 |
|                                                                                                                                                                                                                                                                                                                                                                                                                                                                                                                                                                                                                                          | 0 | 0 | 0 | 0 | 0 | 0 | 0 | 0 | 0  | 0 | 0 | 0 | 0 | 0  | 0  | 0 | 0 | 0 | 0 | 0 | 0 | 0 | 0 | 0 | 0 | 0 | 0 |
| M02255_77_000000000-ADUT3_1_2113_25337_7595 A---CT---AC-GT-GCC-----AGC-A-G-----C-C-G--C-GG-T-GAT-AC-----GT-A-G-G-GC-GC-----G-A---GC-GT-TG-TC-----C-GG-A-A-T-T-----A-T-TG-G-G-C-----GC-----G-T-C-T-----G-T-C--G--TG--A-AA-AC--C-C-TC-G-G----CT-T-AA-----C-C-G-G-G-G-G-C-T---T-G--C-G--G-T-----G--GG-T-A--C-----G-G-G--CC--G-G-C---T-T-G-A-G-T--G---C-GG----CA-G-G-----G-G-A-G---AC-T----GG--A--ATT---C-C-T-G-GT--GT-A-G-CG-GT--G---A-A-A---TG-C-GC-AG--AT-A-TC--A-G--G-A-G-G-A-AC-A-CC--GG--T--G--GC-GAA-G--G-C-G-----G--G-T-C-T---CTG--G--GC-C-G-----T-T---A-C-T-GA--CG-C-T-G--A-GG--A-G-CG-A-AA-G-C---G-TG--GG-G--AG-C-G-AA-----CA--GG  |   |   |   |   |   |   |   |   |    |   |   |   |   |    |    |   |   |   |   |   |   |   |   |   |   |   |   |
| Bacteria(100);Actinobacteria(100);Actinobacteria(100);Actinobacteridae(100);Actinomycetales(100);unclassified(100);unclassified(100);unclassified(100);unclassified(100);                                                                                                                                                                                                                                                                                                                                                                                                                                                                |   |   |   |   |   |   |   |   |    |   |   |   |   |    |    |   |   |   |   |   |   |   |   |   |   |   |   |
| Otu1616                                                                                                                                                                                                                                                                                                                                                                                                                                                                                                                                                                                                                                  | 0 | 0 | 0 | 0 | 0 | 0 | 0 | 0 | 0  | 0 | 0 | 0 | 0 | 0  | 0  | 0 | 0 | 0 | 0 | 0 | 0 | 0 | 0 | 0 | 0 | 0 | 0 |
|                                                                                                                                                                                                                                                                                                                                                                                                                                                                                                                                                                                                                                          | 0 | 0 | 0 | 0 | 0 | 0 | 0 | 0 | 0  | 0 | 0 | 0 | 0 | 0  | 0  | 0 | 0 | 0 | 0 | 0 | 0 | 0 | 0 | 0 | 0 | 0 | 0 |
|                                                                                                                                                                                                                                                                                                                                                                                                                                                                                                                                                                                                                                          | 0 | 0 | 0 | 0 | 0 | 0 | 0 | 0 | 0  | 0 | 0 | 0 | 0 | 23 | 7  | 0 | 0 | 0 | 0 | 0 | 0 | 0 | 0 | 0 | 0 | 0 | 0 |
|                                                                                                                                                                                                                                                                                                                                                                                                                                                                                                                                                                                                                                          | 0 | 0 | 0 | 0 | 0 | 0 | 0 | 0 | 0  | 0 | 0 | 0 | 0 | 0  | 0  | 0 | 0 | 0 | 0 | 0 | 0 | 0 | 0 | 0 | 0 | 0 | 0 |
| M02255_76_000000000-ADUNE_1_2119_18955_13517 T---CG--GC-TA-ACT-----CCG-T-G-----C-C-A--G--CA-G-CCG-CG-----GT-A--A-T-AC-GG-----AG--G---AT-GC-GA-GC-----GTTA-T-C-C-G-----GA-T-CT-A-T-T-----AA---G-T-C-A-----G-T-G--G--TG--A-AA-GT--T-T-GT-C-G----CT-C-AA-----C-G-A-T-A-A-A-A-T---T-G--C-C--G-T-----T-GA-A-A--C-----T-G-G-TA--G-T-C---T-T-G-A-G-T--A---T-GG----AT-G-A-----A-G-T-A--GG-C----GG--A--ATG---C-G-T-G-GT--GT-A-G-CG-GT--G---A-A-A---TG-C-AT-AG--AG-A-TC--A-C-G-C-A-G-A-AC-T-CC--GA--T--T-GC-GAA-G--G-C-A-----G--C-T-T-A--CTA--A--GG-C-A-----T-A--A-C-T-GA--CA-C-T-G--A-AG--C-A-CG-A-AA-G-C---G-TG--GG-T--AT-C-A-AA-----CA--GG      |   |   |   |   |   |   |   |   |    |   |   |   |   |    |    |   |   |   |   |   |   |   |   |   |   |   |   |
| Bacteria(100);Bacteroidetes(100);Bacteroidia(100);Bacteroidales(100);Porphyromonadaceae(100);Tannerella(100);unclassified(100);unclassified(100);unclassified(100);                                                                                                                                                                                                                                                                                                                                                                                                                                                                      |   |   |   |   |   |   |   |   |    |   |   |   |   |    |    |   |   |   |   |   |   |   |   |   |   |   |   |
| Otu1617                                                                                                                                                                                                                                                                                                                                                                                                                                                                                                                                                                                                                                  | 0 | 0 | 0 | 0 | 0 | 0 | 0 | 0 | 0  | 0 | 0 | 0 | 0 | 0  | 0  | 0 | 0 | 0 | 0 | 0 | 0 | 0 | 0 | 0 | 0 | 0 | 0 |
|                                                                                                                                                                                                                                                                                                                                                                                                                                                                                                                                                                                                                                          | 0 | 0 | 0 | 0 | 0 | 0 | 0 | 0 | 0  | 0 | 0 | 0 | 0 | 0  | 0  | 0 | 0 | 0 | 0 | 0 | 0 | 0 | 0 | 0 | 0 | 0 | 0 |
|                                                                                                                                                                                                                                                                                                                                                                                                                                                                                                                                                                                                                                          | 0 | 0 | 0 | 0 | 0 | 0 | 0 | 0 | 0  | 0 | 0 | 0 | 0 | 17 | 0  | 0 | 0 | 0 | 0 | 0 | 0 | 0 | 0 | 0 | 0 | 0 | 0 |
|                                                                                                                                                                                                                                                                                                                                                                                                                                                                                                                                                                                                                                          | 0 | 0 | 0 | 0 | 0 | 0 | 0 | 0 | 0  | 0 | 0 | 0 | 0 | 0  | 0  | 0 | 0 | 0 | 0 | 0 | 0 | 0 | 0 | 0 | 0 | 0 | 0 |
| M02255_77_000000000-ADUT3_1_2114_20704_17107 T---AC--GA-AG-GGG-----GCT-A-G-----C--G--T---T-GC-T-CGG-AA-----TC-A--C-T-GG-GC-----GT--A---AA-GG-GC-GC-----G-TA-G-G-C-G-----G--A-TT-G-T-T-----AA---G-T-C-A-----G-A-G--G--TG--A-AA-GC--C-C-AG-G-G----CT-C-AA-----C-C-C-T-G-G-A-A-T---T-G--C-C--T-T-----T-GA-T-A--C-----T-G-G-CA--A-T-C---T-T-G-A-G-A--C---C-GG----AA-G-A-----G-G-T-T--AG-T----GG--A--ACT---G-C-G-A-GT--GT-A-G-AG-GT--G---A-A-A---TT-C-GT-AG--AT-A-TT--C-G--C-A-A-G-A-AC-A-CC--AG--T--G--GC-GAA-G--G-C-G-----G--C-T-G-A--CTG--G--TC-C-G-----G-T---T-C-T-GA--CG-C-T-G--A-GG--C-A-CG-A-AA-G-C---G-TG--GG-G--AG-C-A-AA-----CA--GG |   |   |   |   |   |   |   |   |    |   |   |   |   |    |    |   |   |   |   |   |   |   |   |   |   |   |   |
| Bacteria(100);Proteobacteria(100);Alphaproteobacteria(100);unclassified(100);unclassified(100);unclassified(100);unclassified(100);unclassified(100);unclassified(100);                                                                                                                                                                                                                                                                                                                                                                                                                                                                  |   |   |   |   |   |   |   |   |    |   |   |   |   |    |    |   |   |   |   |   |   |   |   |   |   |   |   |
| Otu1618                                                                                                                                                                                                                                                                                                                                                                                                                                                                                                                                                                                                                                  | 0 | 0 | 0 | 0 | 0 | 0 | 0 | 0 | 0  | 0 | 0 | 0 | 0 | 0  | 0  | 0 | 0 | 0 | 0 | 0 | 0 | 0 | 0 | 0 | 0 | 0 | 0 |
|                                                                                                                                                                                                                                                                                                                                                                                                                                                                                                                                                                                                                                          | 0 | 0 | 0 | 0 | 0 | 0 | 0 | 0 | 0  | 0 | 0 | 0 | 0 | 0  | 0  | 0 | 0 | 0 | 0 | 0 | 0 | 0 | 0 | 0 | 0 | 0 | 0 |
|                                                                                                                                                                                                                                                                                                                                                                                                                                                                                                                                                                                                                                          | 0 | 0 | 0 | 0 | 0 | 0 | 0 | 0 | 0  | 0 | 0 | 0 | 0 | 20 | 53 | 0 | 0 | 0 | 0 | 0 | 0 | 0 | 0 | 0 | 0 | 0 | 0 |
|                                                                                                                                                                                                                                                                                                                                                                                                                                                                                                                                                                                                                                          | 0 | 0 | 0 | 0 | 0 | 0 | 0 | 0 | 26 | 0 | 0 | 0 | 0 | 0  | 0  | 0 | 0 | 0 | 0 | 0 | 0 | 0 | 0 | 0 | 0 | 0 | 0 |
| M02255_77_000000000-ADUT3_1_1112_20582_10688 T---AC--AT-AG-GGG-----GCA-A-G-----C--G--T---                                                                                                                                                                                                                                                                                                                                                                                                                                                                                                                                                |   |   |   |   |   |   |   |   |    |   |   |   |   |    |    |   |   |   |   |   |   |   |   |   |   |   |   |



|         |                                              |   |   |   |   |   |   |   |   |   |   |   |   |    |                                                                                                                                                                                                                                                                                                                                                                                                                                                                                                                                                                                              |   |   |   |   |   |   |   |     |   |   |   |   |  |                                                                                                                                                                                 |  |  |  |  |  |  |  |  |  |  |  |  |  |
|---------|----------------------------------------------|---|---|---|---|---|---|---|---|---|---|---|---|----|----------------------------------------------------------------------------------------------------------------------------------------------------------------------------------------------------------------------------------------------------------------------------------------------------------------------------------------------------------------------------------------------------------------------------------------------------------------------------------------------------------------------------------------------------------------------------------------------|---|---|---|---|---|---|---|-----|---|---|---|---|--|---------------------------------------------------------------------------------------------------------------------------------------------------------------------------------|--|--|--|--|--|--|--|--|--|--|--|--|--|
| Otu1620 | 0                                            | 0 | 0 | 0 | 0 | 0 | 0 | 0 | 0 | 0 | 0 | 0 | 0 | 0  | 0                                                                                                                                                                                                                                                                                                                                                                                                                                                                                                                                                                                            | 0 | 0 | 0 | 0 | 0 | 0 | 0 | 0   | 0 | 0 | 0 | 0 |  |                                                                                                                                                                                 |  |  |  |  |  |  |  |  |  |  |  |  |  |
|         | 0                                            | 0 | 0 | 0 | 0 | 0 | 0 | 0 | 0 | 0 | 0 | 0 | 0 | 0  | 0                                                                                                                                                                                                                                                                                                                                                                                                                                                                                                                                                                                            | 0 | 0 | 0 | 0 | 0 | 0 | 0 | 0   | 0 | 0 | 0 | 0 |  |                                                                                                                                                                                 |  |  |  |  |  |  |  |  |  |  |  |  |  |
|         | 0                                            | 0 | 0 | 0 | 0 | 0 | 0 | 0 | 0 | 0 | 0 | 0 | 0 | 27 | 57                                                                                                                                                                                                                                                                                                                                                                                                                                                                                                                                                                                           | 0 | 0 | 0 | 0 | 0 | 0 | 0 | 0   | 0 | 0 | 0 | 0 |  |                                                                                                                                                                                 |  |  |  |  |  |  |  |  |  |  |  |  |  |
|         | 0                                            | 0 | 0 | 0 | 0 | 0 | 5 | 0 | 0 | 0 | 0 | 0 | 0 | 0  | 0                                                                                                                                                                                                                                                                                                                                                                                                                                                                                                                                                                                            | 0 | 0 | 0 | 0 | 0 | 0 | 0 | 0   | 0 | 0 | 0 | 0 |  |                                                                                                                                                                                 |  |  |  |  |  |  |  |  |  |  |  |  |  |
|         | M02255_77_000000000-ADUT3_1_2118_27681_15192 |   |   |   |   |   |   |   |   |   |   |   |   |    | T---AC--GT-AG-GGG-----GCA-A-G-----C-G-T---T-AT-C-CGG-AT-----TT-A--C-T-GG-GT-----GT-A----AA-GG-GA-GC-----G-CA-G-G-C-G-----G-T-CT-G-G-C-----AA---G-T-T-G-----A-G-A--G--TG--G-AA-GC--A-G-GG-G-G----CT-C-AA-----C-C-C-C-C-T-G-A-C---T-G--C-T--C-C-----C-AA-A-A--C-----T-G-T--TG--G-A-C---T-G-G-A-G-T-A--T-GG----GA-G-A-----G-G-C-A--GG-C-----GG-A--ATT---C-C-T-A-GT--GT-A-G-CG-GT--G---A-A-A--TG-C-TC-AG--AT-A-TT--A-G-G-A-A-G-A-AC-A-CC--GG--T-G--GC-GAA-G--G-C-G-----G-C-C-T-G--CTG--G--AC-C-A-----A-A--A-C-T--GA--CG-C-T-G--A-GG--C-T-CG-A--GA-G-C---G-TG--GG-G--AG-C-G-AA-----CA--GG         |   |   |   |   |   |   |   |     |   |   |   |   |  | Bacteria(100);Firmicutes(100);Clostridia(100);Clostridiales(100);Lachnospiraceae(100);Catonella(100);unclassified(100);unclassified(100);unclassified(100);                     |  |  |  |  |  |  |  |  |  |  |  |  |  |
| Otu1621 | 0                                            | 0 | 0 | 0 | 0 | 0 | 0 | 0 | 0 | 0 | 0 | 0 | 0 | 0  | 0                                                                                                                                                                                                                                                                                                                                                                                                                                                                                                                                                                                            | 0 | 0 | 0 | 0 | 0 | 0 | 0 | 0   | 0 | 0 | 0 | 0 |  |                                                                                                                                                                                 |  |  |  |  |  |  |  |  |  |  |  |  |  |
|         | 0                                            | 0 | 0 | 0 | 0 | 0 | 0 | 0 | 0 | 0 | 0 | 0 | 0 | 0  | 0                                                                                                                                                                                                                                                                                                                                                                                                                                                                                                                                                                                            | 0 | 0 | 0 | 0 | 0 | 0 | 0 | 0   | 0 | 0 | 0 | 0 |  |                                                                                                                                                                                 |  |  |  |  |  |  |  |  |  |  |  |  |  |
|         | 0                                            | 0 | 0 | 0 | 0 | 0 | 0 | 0 | 0 | 0 | 0 | 0 | 0 | 18 | 0                                                                                                                                                                                                                                                                                                                                                                                                                                                                                                                                                                                            | 0 | 0 | 0 | 0 | 0 | 0 | 0 | 0   | 0 | 0 | 0 | 0 |  |                                                                                                                                                                                 |  |  |  |  |  |  |  |  |  |  |  |  |  |
|         | 0                                            | 0 | 0 | 0 | 0 | 0 | 0 | 0 | 0 | 0 | 0 | 0 | 0 | 0  | 0                                                                                                                                                                                                                                                                                                                                                                                                                                                                                                                                                                                            | 0 | 0 | 0 | 0 | 0 | 0 | 0 | 0   | 0 | 0 | 0 | 0 |  |                                                                                                                                                                                 |  |  |  |  |  |  |  |  |  |  |  |  |  |
|         | M02255_77_000000000-ADUT3_1_1112_18973_14722 |   |   |   |   |   |   |   |   |   |   |   |   |    | T---AC--GA-AG-GGG-----GCT-A-G-----C-G-T---T-GT-T-CGG-AA-----TT-A--C-T-GG-GC-----GT--A----AA-GC-GC-GC-----G-CA-G-G-C-G-----G--C-TA-T-C-C-----AA---G-T-C-A-----G-T-G--G--TG--A-AA-GC--C-C-GG-A-G----CT-C-AA-----C-T-C-C-G-G-A--A-C---T-G--C-C--A--T-----T--GA-A-A--C-----T-G-T--TT--A-G-C---T-T-G-A-G-G--A--C-GA---GA-G-A-----G-G-T-G--AG-T-----GG--A--ATT---C-C-C-A-GT--GT-A-G-AG-GT--G---A-A-A--TT-C-GT-AG--AT-A-TT--G-G-G-A-A-G-A-AC-A-CC--GG--T-G--GC-GAA-G--G-C-G-----G-C-T-C-A--CTG--G--CT-C-G-----T-T--T-C-T--GA--CG-C-T-C--A-GG--C-G-CG-A--TA-G-C---G-TG--GG-G--AT-C-A-AA-----CA--GG   |   |   |   |   |   |   |   |     |   |   |   |   |  | Bacteria(100);Proteobacteria(100);Alphaproteobacteria(100);Rhizobiales(100);Methylocystaceae(100);uncultured(100);unclassified(100);unclassified(100);unclassified(100);        |  |  |  |  |  |  |  |  |  |  |  |  |  |
| Otu1622 | 0                                            | 0 | 0 | 0 | 0 | 0 | 0 | 0 | 0 | 0 | 0 | 0 | 0 | 0  | 0                                                                                                                                                                                                                                                                                                                                                                                                                                                                                                                                                                                            | 0 | 0 | 0 | 0 | 0 | 0 | 0 | 0   | 0 | 0 | 0 | 0 |  |                                                                                                                                                                                 |  |  |  |  |  |  |  |  |  |  |  |  |  |
|         | 0                                            | 0 | 0 | 0 | 0 | 0 | 0 | 0 | 0 | 0 | 0 | 0 | 0 | 0  | 0                                                                                                                                                                                                                                                                                                                                                                                                                                                                                                                                                                                            | 0 | 0 | 0 | 0 | 0 | 0 | 0 | 0   | 0 | 0 | 0 | 0 |  |                                                                                                                                                                                 |  |  |  |  |  |  |  |  |  |  |  |  |  |
|         | 0                                            | 0 | 0 | 0 | 0 | 0 | 0 | 0 | 0 | 0 | 0 | 0 | 0 | 90 | 0                                                                                                                                                                                                                                                                                                                                                                                                                                                                                                                                                                                            | 0 | 0 | 0 | 0 | 0 | 0 | 0 | 0   | 0 | 0 | 0 | 0 |  |                                                                                                                                                                                 |  |  |  |  |  |  |  |  |  |  |  |  |  |
|         | 0                                            | 0 | 0 | 0 | 0 | 0 | 0 | 0 | 0 | 0 | 0 | 0 | 0 | 0  | 0                                                                                                                                                                                                                                                                                                                                                                                                                                                                                                                                                                                            | 0 | 0 | 0 | 0 | 0 | 0 | 0 | 0   | 0 | 0 | 0 | 0 |  |                                                                                                                                                                                 |  |  |  |  |  |  |  |  |  |  |  |  |  |
|         | M02255_77_000000000-ADUT3_1_1108_20310_16503 |   |   |   |   |   |   |   |   |   |   |   |   |    | T---AC--GA-AG-GGG-----GCT-A-G-----C-G-T---T-GC-T-CGG-AA-----TG-A--C-T-GG-GC-----GT--A----AA-GG-GC-GC-----G-TA-G-G-C-G-----G--A-CA-T-A-T-----TA---G-T-C-A-----G-G-C--G--TG--A-AA-TT--C-C-CG-G-G----CT-T-AA-----C-C-T-G-G-G-G--G-C---T-G--C-G--T--T-----T--GA-T-A--C-----G-G-T--GT--G-T-C---T-T-G-A-G-T-G--G-GG---AA-G-A-----G-G-G-T--CG-T-----GG--A--ATT---C-C-C-A-GT--GT-A-G-AG-GT--G---A-A-A--TT-C-GT-AG--AT-A-TT--G-G-G-A-A-G-A-AC-A-CC--GG--T-G--GC-GAA-G--G-C-G-----G-C-G-A-C--CTG--G--TC-C-T-----T-G--A-C-T--GA--CG-C-T-G--A-GG--C-G-CG-A--AA-G-C---G-TG--GG-GG-G--AG-C-A-AA-----CA--GG |   |   |   |   |   |   |   |     |   |   |   |   |  | Bacteria(100);Proteobacteria(100);Alphaproteobacteria(100);Rhodospirillales(100);Acetobacteraceae(100);unclassified(100);unclassified(100);unclassified(100);unclassified(100); |  |  |  |  |  |  |  |  |  |  |  |  |  |
| Otu1623 | 0                                            | 0 | 0 | 0 | 0 | 0 | 0 | 0 | 0 | 0 | 0 | 0 | 0 | 0  | 0                                                                                                                                                                                                                                                                                                                                                                                                                                                                                                                                                                                            | 0 | 0 | 0 | 0 | 0 | 0 | 0 | 0   | 0 | 0 | 0 | 0 |  |                                                                                                                                                                                 |  |  |  |  |  |  |  |  |  |  |  |  |  |
|         | 0                                            | 0 | 0 | 0 | 0 | 0 | 0 | 0 | 0 | 0 | 0 | 0 | 0 | 0  | 0                                                                                                                                                                                                                                                                                                                                                                                                                                                                                                                                                                                            | 0 | 0 | 0 | 0 | 0 | 0 | 0 | 0   | 0 | 0 | 0 | 0 |  |                                                                                                                                                                                 |  |  |  |  |  |  |  |  |  |  |  |  |  |
|         | 0                                            | 0 | 0 | 0 | 0 | 0 | 0 | 0 | 0 | 0 | 0 | 0 | 0 | 36 | 0                                                                                                                                                                                                                                                                                                                                                                                                                                                                                                                                                                                            | 0 | 0 | 0 | 0 | 0 | 0 | 0 | 223 | 0 | 0 | 0 | 0 |  |                                                                                                                                                                                 |  |  |  |  |  |  |  |  |  |  |  |  |  |
|         | 0                                            | 0 | 0 | 0 | 0 | 0 | 0 | 0 | 0 | 0 | 0 | 0 | 0 | 0  | 0                                                                                                                                                                                                                                                                                                                                                                                                                                                                                                                                                                                            | 0 | 0 | 0 | 0 | 0 | 0 | 0 | 0   | 0 | 0 | 0 | 0 |  |                                                                                                                                                                                 |  |  |  |  |  |  |  |  |  |  |  |  |  |
|         | M02255_77_000000000-ADUT                     |   |   |   |   |   |   |   |   |   |   |   |   |    |                                                                                                                                                                                                                                                                                                                                                                                                                                                                                                                                                                                              |   |   |   |   |   |   |   |     |   |   |   |   |  |                                                                                                                                                                                 |  |  |  |  |  |  |  |  |  |  |  |  |  |



|                                              |   |   |   |    |   |   |   |   |   |                                                                                                                                                                                                                           |   |   |   |     |     |   |   |   |   |   |   |   |   |   |   |   |   |  |  |  |  |  |  |  |  |
|----------------------------------------------|---|---|---|----|---|---|---|---|---|---------------------------------------------------------------------------------------------------------------------------------------------------------------------------------------------------------------------------|---|---|---|-----|-----|---|---|---|---|---|---|---|---|---|---|---|---|--|--|--|--|--|--|--|--|
| Otu1625                                      | 0 | 0 | 0 | 0  | 0 | 0 | 0 | 0 | 0 | 0                                                                                                                                                                                                                         | 0 | 0 | 0 | 0   | 0   | 0 | 0 | 0 | 0 | 0 | 0 | 0 | 0 | 0 | 0 | 0 | 0 |  |  |  |  |  |  |  |  |
|                                              | 0 | 0 | 0 | 0  | 0 | 0 | 0 | 0 | 0 | 0                                                                                                                                                                                                                         | 0 | 0 | 0 | 0   | 0   | 0 | 0 | 0 | 0 | 0 | 0 | 0 | 0 | 0 | 0 | 0 | 0 |  |  |  |  |  |  |  |  |
|                                              | 0 | 0 | 0 | 0  | 0 | 0 | 0 | 0 | 0 | 0                                                                                                                                                                                                                         | 0 | 0 | 0 | 139 | 168 | 0 | 0 | 0 | 0 | 0 | 0 | 0 | 0 | 0 | 0 | 0 | 0 |  |  |  |  |  |  |  |  |
|                                              | 0 | 0 | 0 | 0  | 0 | 0 | 0 | 0 | 0 | 0                                                                                                                                                                                                                         | 0 | 0 | 0 | 0   | 0   | 0 | 0 | 0 | 0 | 0 | 0 | 0 | 0 | 0 | 0 |   |   |  |  |  |  |  |  |  |  |
| M02255_77_000000000-ADUT3_1_1107_17240_10394 |   |   |   |    |   |   |   |   |   | C---A---GC-A--GCC-----GCG-G-T----G-A-T--A--CG-T-AGG-GC-----GC-G--A-G--CG-TT-----GT--C----CG-GA-AT-TA-----T-TG-G-G-C-G-----G--C-TG-G-T-C-----                                                                              |   |   |   |     |     |   |   |   |   |   |   |   |   |   |   |   |   |  |  |  |  |  |  |  |  |
|                                              |   |   |   |    |   |   |   |   |   | ----GC---G-T-C-T-----G-T-C--G--TG--A-AA-AC--C-C-TC-G-G----CT-T-AA-----C-C-G-G-G-G-G-C-T---T-G--C-G---G--T-----G--GG-T-A--C-----G--G-G--CC--G-G-C---T-T-G-A-G-T--G---C-GG----CA-G-G-----G-G-A-G---AC-T-----GG--A--ATT----  |   |   |   |     |     |   |   |   |   |   |   |   |   |   |   |   |   |  |  |  |  |  |  |  |  |
|                                              |   |   |   |    |   |   |   |   |   | C-C-T-G-GT--GT-A-G-CG-GT--G---G--A-A---TG-C-GC-AG--AT-A-TC--A-G--G-A-G-G-A-AC-A-CC---GG--T--G--GC-GAA-G--G-C-G-----G--G-T-C-T---CTG--G--GC-C-G-----T-T---A-C-T--GA--CG-C-T-G--A-GG--A-G-CG-A--AA-G-C---G-TG--             |   |   |   |     |     |   |   |   |   |   |   |   |   |   |   |   |   |  |  |  |  |  |  |  |  |
|                                              |   |   |   |    |   |   |   |   |   | GG-G--AG-C-G-AA-----CA--GG Bacteria(100);Actinobacteria(100);Actinobacteria(100);Actinobacteridae(100);Actinomycetales(100);unclassified(100);unclassified(100);unclassified(100);unclassified(100);                      |   |   |   |     |     |   |   |   |   |   |   |   |   |   |   |   |   |  |  |  |  |  |  |  |  |
| Otu1626                                      | 0 | 0 | 0 | 0  | 0 | 0 | 0 | 0 | 0 | 0                                                                                                                                                                                                                         | 0 | 0 | 0 | 0   | 0   | 0 | 0 | 0 | 0 | 0 | 0 | 0 | 0 | 0 | 0 | 0 | 0 |  |  |  |  |  |  |  |  |
|                                              | 0 | 0 | 0 | 0  | 0 | 0 | 0 | 0 | 0 | 0                                                                                                                                                                                                                         | 0 | 0 | 0 | 0   | 0   | 0 | 0 | 0 | 0 | 0 | 0 | 0 | 0 | 0 | 0 | 0 | 0 |  |  |  |  |  |  |  |  |
|                                              | 0 | 0 | 0 | 0  | 0 | 0 | 0 | 0 | 0 | 0                                                                                                                                                                                                                         | 0 | 0 | 0 | 84  | 57  | 0 | 0 | 0 | 0 | 0 | 0 | 0 | 0 | 0 | 0 | 0 | 0 |  |  |  |  |  |  |  |  |
|                                              | 0 | 0 | 0 | 0  | 0 | 0 | 0 | 0 | 0 | 3                                                                                                                                                                                                                         | 0 | 0 | 0 | 0   | 0   | 0 | 0 | 0 | 0 | 0 | 0 | 0 | 0 | 0 | 0 | 0 | 0 |  |  |  |  |  |  |  |  |
| M02255_77_000000000-ADUT3_1_1104_17646_14396 |   |   |   |    |   |   |   |   |   | T---AC--GT-AG-GAT-----CCG-A-G-----C--G--T---T--AT-C-CGG-AG-----TG-A--C-T--GG-GC-----GT--A----AA-GA-GTTGC-----G-TA-G-G-C-G-----G--T-TT-G-T-T-----                                                                          |   |   |   |     |     |   |   |   |   |   |   |   |   |   |   |   |   |  |  |  |  |  |  |  |  |
|                                              |   |   |   |    |   |   |   |   |   | -----AA---G-C-G-A-----A-T-A-G--TG--A-AA-TC--T-G-GT-G-G----CT-C-AA-----C-C-A-TAC-A-G--A-C---T-A--T-T---A--T-----T--CG-A-A--C-----T--G-G--CA--A-A-C---T-C-G-A-G-A--G---T-AG----CA-G-A-----G-G-T-A--AC-T-----GG--A--ATT---T- |   |   |   |     |     |   |   |   |   |   |   |   |   |   |   |   |   |  |  |  |  |  |  |  |  |
|                                              |   |   |   |    |   |   |   |   |   | C-T-A-GT--GT-A-G-GA-GT--G---A--A-A---TC-C-GT-AG--AT-A-TT--A-G--A-A-G-G-A-AC-A-CC---GA--T--G--GC-GTA-G--G-C-A-----G--G-T-T-A--CTG--G--GC-T-A-----T-T---T-C-T--GA--CG-C-T-A--A-GG--C-A-CG-A--AA-G-C---G-TG--GG-G--          |   |   |   |     |     |   |   |   |   |   |   |   |   |   |   |   |   |  |  |  |  |  |  |  |  |
|                                              |   |   |   |    |   |   |   |   |   | AG-C-G-AA-----CC--GG Bacteria(100);Candidate_division_TM7(100);unclassified(100);unclassified(100);unclassified(100);unclassified(100);unclassified(100);unclassified(100);unclassified(100);                             |   |   |   |     |     |   |   |   |   |   |   |   |   |   |   |   |   |  |  |  |  |  |  |  |  |
| Otu1627                                      | 0 | 0 | 0 | 0  | 0 | 0 | 0 | 0 | 0 | 0                                                                                                                                                                                                                         | 0 | 0 | 0 | 0   | 0   | 0 | 0 | 0 | 0 | 0 | 0 | 0 | 0 | 0 | 0 | 0 | 0 |  |  |  |  |  |  |  |  |
|                                              | 0 | 0 | 0 | 0  | 0 | 0 | 0 | 0 | 0 | 0                                                                                                                                                                                                                         | 0 | 0 | 0 | 0   | 0   | 0 | 0 | 0 | 0 | 0 | 0 | 0 | 0 | 0 | 0 | 0 | 0 |  |  |  |  |  |  |  |  |
|                                              | 0 | 0 | 0 | 0  | 0 | 0 | 0 | 0 | 0 | 0                                                                                                                                                                                                                         | 0 | 0 | 0 | 10  | 32  | 0 | 0 | 0 | 0 | 0 | 0 | 0 | 0 | 0 | 0 | 0 | 0 |  |  |  |  |  |  |  |  |
|                                              | 0 | 0 | 0 | 0  | 0 | 0 | 0 | 0 | 0 | 0                                                                                                                                                                                                                         | 0 | 0 | 0 | 0   | 0   | 0 | 0 | 0 | 0 | 0 | 0 | 0 | 0 | 0 | 0 |   |   |  |  |  |  |  |  |  |  |
| M02255_77_000000000-ADUT3_1_1102_18362_20766 |   |   |   |    |   |   |   |   |   | T---AC--GT-AG-GGG-----GCA-A-G-----C--G--T---T--AT-C-CGG-AT-----TT-A--C-T--GG-GT-----GT--A----AA-GG-GA-GC-----G-TA-G-A-C-G-----G--T-AC-T-G-C-----                                                                          |   |   |   |     |     |   |   |   |   |   |   |   |   |   |   |   |   |  |  |  |  |  |  |  |  |
|                                              |   |   |   |    |   |   |   |   |   | -----AA---G-T-C-T-----G-G-A-G--TG--A-AA-CC--C-G-CG-G-G----CT-C-AA-----C-C-T-G-C-G-G--C-A---T-G--C-T---T--T-----G--GA-A-A--C-----T--G-T--GG--T-A-C---T-G-G-A-G-T--G---T-CG----GA-G-A-----G-G-T-A--AG-C-----GG--A--ATT----  |   |   |   |     |     |   |   |   |   |   |   |   |   |   |   |   |   |  |  |  |  |  |  |  |  |
|                                              |   |   |   |    |   |   |   |   |   | C-C-C-A-GT--GT-A-G-CG-GT--G---A--A-A---TG-C-GT-AG--AT-A-TT--G-G--G-A-A-G-A-AC-A-CC---TG--G--G--GC-GAA-G--G-C-G-----G--C-T-T-A--CTG--G--AC-G-A-----T-T---A-C-T--GA--CG-T-T-G--A-GG--C-T-CG-A--AG-G-C---G-TG--GG-           |   |   |   |     |     |   |   |   |   |   |   |   |   |   |   |   |   |  |  |  |  |  |  |  |  |
|                                              |   |   |   |    |   |   |   |   |   | G--AG-C-A-AA-----CA--GG Bacteria(100);unclassified(100);unclassified(100);unclassified(100);unclassified(100);unclassified(100);unclassified(100);unclassified(100);unclassified(100);                                    |   |   |   |     |     |   |   |   |   |   |   |   |   |   |   |   |   |  |  |  |  |  |  |  |  |
| Otu1628                                      | 0 | 0 | 0 | 0  | 0 | 0 | 0 | 0 | 0 | 0                                                                                                                                                                                                                         | 0 | 0 | 0 | 0   | 0   | 0 | 0 | 0 | 0 | 0 | 0 | 0 | 0 | 0 | 0 | 0 | 0 |  |  |  |  |  |  |  |  |
|                                              | 0 | 0 | 0 | 0  | 0 | 0 | 0 | 0 | 0 | 0                                                                                                                                                                                                                         | 0 | 0 | 0 | 0   | 0   | 0 | 0 | 0 | 0 | 0 | 0 | 0 | 0 | 0 | 0 | 0 | 0 |  |  |  |  |  |  |  |  |
|                                              | 0 | 0 | 0 | 0  | 0 | 0 | 0 | 0 | 0 | 0                                                                                                                                                                                                                         | 0 | 0 | 0 | 22  | 10  | 0 | 0 | 0 | 0 | 0 | 0 | 0 | 0 | 0 | 0 | 0 | 0 |  |  |  |  |  |  |  |  |
|                                              | 0 | 0 | 0 | 0  | 0 | 0 | 0 | 0 | 0 | 0                                                                                                                                                                                                                         | 0 | 0 | 0 | 0   | 0   | 0 | 0 | 0 | 0 | 0 | 0 | 0 | 0 | 0 | 0 |   |   |  |  |  |  |  |  |  |  |
| M02255_76_000000000-ADUNE_1_1105_9733_24596  |   |   |   |    |   |   |   |   |   | G---TG---CC-AG-CAG-----CCG-C-G-----G--T---A--AT-A-CGT-AG-----GG-G--G-C--GA-GC-----GT--T-----GT-CC-GG-AA-----T-TA-C-T-G-G-----G--C-GT-A-A-A-----GG-                                                                        |   |   |   |     |     |   |   |   |   |   |   |   |   |   |   |   |   |  |  |  |  |  |  |  |  |
|                                              |   |   |   |    |   |   |   |   |   | ---G-C-A-C-----G-C-T--G--TA--A-AA-GG--A-T-GC-G-G----CT-T-AA-----C-C-G-T-G-T-T--A-----T-G--C-G---G--C-----T--GA-G-A--C-----T--G-A--GG--T-G-C---T-G-G-A-G-T--A--C-CG----GA-G-A-----G-G-C-A--AG-T-----GG--A--ATT---C-C-C-A-  |   |   |   |     |     |   |   |   |   |   |   |   |   |   |   |   |   |  |  |  |  |  |  |  |  |
|                                              |   |   |   |    |   |   |   |   |   | GT--GT-A-G-CG-GT--G---A--A-A---TG-C-GT-AG--AT-A-TT--G-G--G-A-A-G-A-AC-A-TC---GG--T--G--GC-GAA-G--G-C-G-----A--C-T-T-G---CTG--G--AC-G-G-----T-A---A-C-T--GA--CG-C-T-G--A-GG--T-G-CG-A--AA-G-C---C-AG--GG-T--AG-            |   |   |   |     |     |   |   |   |   |   |   |   |   |   |   |   |   |  |  |  |  |  |  |  |  |
|                                              |   |   |   |    |   |   |   |   |   | C-G-AA-----CG--GG Bacteria(100);Synergistetes(100);Synergistia(100);Synergistales(100);Synergistaceae(100);uncultured(100);unclassified(100);unclassified(100);unclassified(100);                                         |   |   |   |     |     |   |   |   |   |   |   |   |   |   |   |   |   |  |  |  |  |  |  |  |  |
| Otu1629                                      | 0 | 0 | 0 | 39 | 0 | 0 | 0 | 0 | 0 | 0                                                                                                                                                                                                                         | 0 | 0 | 0 | 0   | 0   | 0 | 0 | 0 | 0 | 0 | 0 | 0 | 0 | 0 | 0 | 0 | 0 |  |  |  |  |  |  |  |  |
|                                              | 0 | 0 | 0 | 0  | 0 | 0 | 0 | 0 | 0 | 0                                                                                                                                                                                                                         | 0 | 0 | 0 | 0   | 0   | 0 | 0 | 0 | 0 | 0 | 0 | 0 | 0 | 0 | 0 | 0 | 0 |  |  |  |  |  |  |  |  |
|                                              | 0 | 0 | 0 | 0  | 0 | 0 | 0 | 0 | 0 | 0                                                                                                                                                                                                                         | 0 | 0 | 0 | 0   | 0   | 0 | 0 | 0 | 0 | 0 | 0 | 0 | 0 | 0 | 0 | 0 | 0 |  |  |  |  |  |  |  |  |
|                                              | 0 | 0 | 0 | 0  | 0 | 0 | 0 | 0 | 0 | 0                                                                                                                                                                                                                         | 0 | 0 | 0 | 0   | 0   | 0 | 0 | 0 | 0 | 0 | 0 | 0 | 0 | 0 | 0 |   |   |  |  |  |  |  |  |  |  |
| M02255_77_000000000-ADUT3_1_1103_21753_19784 |   |   |   |    |   |   |   |   |   | T---AC--GT-AG-GGG-----GCA-A-G-----C--G--T---T--AT-C-CGG-AT-----TT-A--C-T--GG-GT-----GT--A----AA-GG-GA-GC-----G-TA-G-A-C-G-----G--C-GT-A-T-C-----                                                                          |   |   |   |     |     |   |   |   |   |   |   |   |   |   |   |   |   |  |  |  |  |  |  |  |  |
|                                              |   |   |   |    |   |   |   |   |   | -----AA---G-T-C-T-----G-A-T--G--TG--A-AA-GG--C-A-GG-G-G----CT-C-AA-----C-C-C-C-T-G-G--A-C---T-G--C-A---T--T-----G--GA-A-A--C-----T--G-G--TA--T-G-C---T-C-A-A-G-T--G---C-CG----GA-G-A-----G-G-T-A--AG-C-----GG--A--ATT---  |   |   |   |     |     |   |   |   |   |   |   |   |   |   |   |   |   |  |  |  |  |  |  |  |  |
|                                              |   |   |   |    |   |   |   |   |   | C-C-T-A-GT--GT-A-G-CG-GT--G---A--A-A---TG-C-GT-AG--AT-A-TT--A-G--G-A-G-G-A-AC-A-CC---AG--T--G--GC-GAA-G--G-C-G-----G--C-T-T-A--CTG--G--AC-G-G-----T-A---A-C-T--GA--CG-T-T-G--A-GG--C-T-CG-A--AA-G-C---G-TG--GG-           |   |   |   |     |     |   |   |   |   |   |   |   |   |   |   |   |   |  |  |  |  |  |  |  |  |
|                                              |   |   |   |    |   |   |   |   |   | G--AG-C-A-AA-----CA--GG Bacteria(100);Firmicutes(100);Clostridia(100);Clostridiales(100);Lachnospiraceae(100);unclassified(100);unclassified(100);unclassified(100);unclassified(100);                                    |   |   |   |     |     |   |   |   |   |   |   |   |   |   |   |   |   |  |  |  |  |  |  |  |  |



[illegible]



|                                                                                                                                                                                                                           |   |   |   |   |    |   |   |   |    |   |    |   |   |   |   |   |   |   |   |   |   |   |   |   |   |   |   |
|---------------------------------------------------------------------------------------------------------------------------------------------------------------------------------------------------------------------------|---|---|---|---|----|---|---|---|----|---|----|---|---|---|---|---|---|---|---|---|---|---|---|---|---|---|---|
| Otu1635                                                                                                                                                                                                                   | 0 | 0 | 0 | 0 | 15 | 0 | 0 | 0 | 0  | 0 | 0  | 0 | 0 | 0 | 0 | 0 | 0 | 0 | 0 | 0 | 0 | 0 | 0 | 0 | 0 | 0 | 0 |
|                                                                                                                                                                                                                           | 0 | 0 | 0 | 0 | 0  | 0 | 0 | 0 | 0  | 0 | 0  | 0 | 0 | 0 | 0 | 0 | 0 | 0 | 0 | 0 | 0 | 0 | 0 | 0 | 0 | 0 |   |
|                                                                                                                                                                                                                           | 0 | 0 | 0 | 0 | 0  | 0 | 0 | 0 | 0  | 0 | 0  | 0 | 0 | 0 | 0 | 0 | 0 | 0 | 0 | 0 | 0 | 0 | 0 | 0 | 0 | 0 |   |
|                                                                                                                                                                                                                           | 0 | 0 | 0 | 0 | 0  | 0 | 0 | 0 | 0  | 0 | 0  | 0 | 0 | 0 | 0 | 0 | 0 | 0 | 0 | 0 | 0 | 0 | 0 | 0 | 0 |   |   |
| M02255_76_000000000-ADUNE_1_1107_14196_19934                                                                                                                                                                              |   |   |   |   |    |   |   |   |    |   |    |   |   |   |   |   |   |   |   |   |   |   |   |   |   |   |   |
| .....AC---T-AC-GT-----GCC-A-G-----C--A--G--C--CG-C-GGT-AA-----TA-C--G-T--AG-GT-----GG--C-----AA-GC-G--TT-----G-TC-C-G--G-----A--T-GA-C-T-T-----                                                                           |   |   |   |   |    |   |   |   |    |   |    |   |   |   |   |   |   |   |   |   |   |   |   |   |   |   |   |
| AA---G-T-C-T-----G-A-T--G--TG--A-AA-GC--C-C-AC-G-G-----CT-C-AA-----C-C-G-T-G-G-A--G-----G-GT-C-A--T--T-----G--GA-A-A--C-----T--G-G--GT--C-A-C---T-T-G-A-G-T--A--C-AG-----AA-G-A-----G-G-A-A--AG-T-----GG--A--ATT---C-C-   |   |   |   |   |    |   |   |   |    |   |    |   |   |   |   |   |   |   |   |   |   |   |   |   |   |   |   |
| A-T-GT--GT-A-G-AG-GT--G---A--A-A---TT-C-GT-AG--AT-A-TA--T-G--G-A-G-G-A-AC-A-CC--AG--T--G--GC-GAA-A-G-C--G-----A--C-T-T-T---CTA--T--TC-T-G-----A-C---A-C-T-GA--CG-C-T-G--A-GG--C-T-CG-A-AA-G-C---G-TG--GG-T--              |   |   |   |   |    |   |   |   |    |   |    |   |   |   |   |   |   |   |   |   |   |   |   |   |   |   |   |
| AG-C-A-AA-----CA--GG                                                                                                                                                                                                      |   |   |   |   |    |   |   |   |    |   |    |   |   |   |   |   |   |   |   |   |   |   |   |   |   |   |   |
| Bacteria(100);Firmicutes(100);Bacilli(100);Lactobacillales(100);unclassified(100);unclassified(100);unclassified(100);unclassified(100);unclassified(100);                                                                |   |   |   |   |    |   |   |   |    |   |    |   |   |   |   |   |   |   |   |   |   |   |   |   |   |   |   |
| Otu1636                                                                                                                                                                                                                   | 0 | 0 | 0 | 5 | 0  | 0 | 0 | 0 | 0  | 0 | 0  | 0 | 0 | 0 | 0 | 0 | 0 | 0 | 0 | 0 | 0 | 0 | 0 | 0 | 0 | 0 |   |
|                                                                                                                                                                                                                           | 0 | 0 | 0 | 0 | 0  | 0 | 0 | 0 | 1  | 1 | 1  | 0 | 0 | 6 | 0 | 0 | 0 | 0 | 0 | 0 | 0 | 0 | 0 | 0 | 0 | 0 |   |
|                                                                                                                                                                                                                           | 0 | 0 | 0 | 0 | 0  | 0 | 0 | 0 | 0  | 0 | 0  | 0 | 0 | 2 | 0 | 0 | 0 | 0 | 0 | 0 | 0 | 0 | 0 | 0 | 0 | 0 |   |
|                                                                                                                                                                                                                           | 0 | 0 | 0 | 0 | 0  | 0 | 0 | 0 | 0  | 0 | 0  | 0 | 0 | 0 | 0 | 0 | 0 | 0 | 0 | 0 | 0 | 0 | 0 | 0 | 0 |   |   |
| M02255_77_000000000-ADUT3_1_1104_17411_19641                                                                                                                                                                              |   |   |   |   |    |   |   |   |    |   |    |   |   |   |   |   |   |   |   |   |   |   |   |   |   |   |   |
| C---GG--CT-AA-CT-----ACG-T-G-----C--C--A--G--CA-G-CCG-CG-----GT-A--A-T--AC-GT-----AG--G-----TC-CC-GA-GC-----G-TT-GTC-C-G-----G--T-TT-A-T-T-----                                                                           |   |   |   |   |    |   |   |   |    |   |    |   |   |   |   |   |   |   |   |   |   |   |   |   |   |   |   |
| ---AA---G-T-C-T-----G-G-T--G--TA--A-AA-GG--C-A-GT-G-G-----CT-C-AA-----C-C-A-T-T-G-T--A-----T-G--C-A--T--T-----G--GA-A-A--C-----T--G-G--TA-G-A-C---T-T-G-A-G-T--G--C-AG-----GA-G-A-----G-G-A-G--AG-T-----GG--A--ATT---C-   |   |   |   |   |    |   |   |   |    |   |    |   |   |   |   |   |   |   |   |   |   |   |   |   |   |   |   |
| C-A-T-GT--GT-A-G-CG-GT--G---A--A-A---TG-C-GT-AG--AT-A-TA--T-G--G-A-G-G-A-AC-A-CC--GG--T--G--GC-GAA-A-G-C--G-----G--C-T-C-T---CTG--G--CC-T-G-----T-A--A-C-T--GA--CA-C-T-G--A-GG--C-T-CG-A-AA-G-C---G-TG--GG-G-             |   |   |   |   |    |   |   |   |    |   |    |   |   |   |   |   |   |   |   |   |   |   |   |   |   |   |   |
| -AG-C-A-AA-----CA--GG                                                                                                                                                                                                     |   |   |   |   |    |   |   |   |    |   |    |   |   |   |   |   |   |   |   |   |   |   |   |   |   |   |   |
| Bacteria(100);Firmicutes(100);Bacilli(100);Lactobacillales(100);Streptococcaceae(100);Lactococcus(100);unclassified(100);unclassified(100);unclassified(100);                                                             |   |   |   |   |    |   |   |   |    |   |    |   |   |   |   |   |   |   |   |   |   |   |   |   |   |   |   |
| Otu1637                                                                                                                                                                                                                   | 0 | 0 | 0 | 0 | 0  | 0 | 0 | 0 | 0  | 0 | 21 | 0 | 0 | 0 | 0 | 0 | 0 | 0 | 0 | 0 | 0 | 0 | 0 | 0 | 0 | 0 |   |
|                                                                                                                                                                                                                           | 0 | 0 | 0 | 0 | 0  | 0 | 0 | 0 | 0  | 0 | 0  | 0 | 0 | 0 | 0 | 0 | 0 | 0 | 0 | 0 | 0 | 0 | 0 | 0 | 0 | 0 |   |
|                                                                                                                                                                                                                           | 0 | 0 | 0 | 0 | 0  | 0 | 0 | 0 | 0  | 0 | 0  | 0 | 0 | 0 | 0 | 0 | 0 | 0 | 0 | 0 | 0 | 0 | 0 | 0 | 0 | 0 |   |
|                                                                                                                                                                                                                           | 0 | 0 | 0 | 0 | 0  | 0 | 0 | 0 | 0  | 0 | 0  | 0 | 0 | 0 | 0 | 0 | 0 | 0 | 0 | 0 | 0 | 0 | 0 | 0 | 0 |   |   |
| M02255_76_000000000-ADUNE_1_1119_4959_17893                                                                                                                                                                               |   |   |   |   |    |   |   |   |    |   |    |   |   |   |   |   |   |   |   |   |   |   |   |   |   |   |   |
| C---GG--CT-AA-CT-----CCG-T-G-----C--C--A--G--CA-G-CCG-CG-----GT-A--A-T--AC-GT-----AG--G-----TG-GC-AA-GC-----G-TT-GTC-C-G-----G--A-TC-T-T-T-----AA--                                                                       |   |   |   |   |    |   |   |   |    |   |    |   |   |   |   |   |   |   |   |   |   |   |   |   |   |   |   |
| --G-T-C-T-----G-A-T--G--TG--A-AA-GC--C-C-CC-G-G-----CT-C-AA-----C-C-G-G-G-G-A--G-----G-GT-C-A--T--T-----G--GA-A-A--C-----T--G-G--AG--A-A-C---T-T-G-A-G-T--G--C-AG-----AA-G-A-----G-G-A-G--AG-T-----GG--A--ATT---C-C-A-C-  |   |   |   |   |    |   |   |   |    |   |    |   |   |   |   |   |   |   |   |   |   |   |   |   |   |   |   |
| GT--GT-A-G-CG-GT--G---A--A-A---TG-C-GT-AG--AT-A-TG--T-G--G-A-G-G-A-AC-A-CC--AG--T--G--GC-GAA-G--G-C--G-----A--C-T-C-T---CTG--G--TC-T-G-----T-A--A-C-T--GA--CG-C-T-G--A-GG--C-T-CG-A-AA-G-C---G-TG--GG-G--AG-C-            |   |   |   |   |    |   |   |   |    |   |    |   |   |   |   |   |   |   |   |   |   |   |   |   |   |   |   |
| A-AA-----CA--GG                                                                                                                                                                                                           |   |   |   |   |    |   |   |   |    |   |    |   |   |   |   |   |   |   |   |   |   |   |   |   |   |   |   |
| Bacteria(100);Firmicutes(100);Bacilli(100);unclassified(100);unclassified(100);unclassified(100);unclassified(100);unclassified(100);unclassified(100);                                                                   |   |   |   |   |    |   |   |   |    |   |    |   |   |   |   |   |   |   |   |   |   |   |   |   |   |   |   |
| Otu1638                                                                                                                                                                                                                   | 0 | 0 | 0 | 0 | 0  | 0 | 0 | 0 | 0  | 0 | 0  | 0 | 0 | 0 | 0 | 0 | 0 | 0 | 0 | 0 | 0 | 0 | 3 | 0 | 0 | 1 | 0 |
|                                                                                                                                                                                                                           | 0 | 0 | 0 | 0 | 0  | 0 | 0 | 0 | 0  | 0 | 0  | 0 | 0 | 0 | 0 | 0 | 0 | 0 | 0 | 0 | 0 | 0 | 0 | 0 | 0 | 0 |   |
|                                                                                                                                                                                                                           | 0 | 0 | 0 | 0 | 0  | 0 | 0 | 0 | 0  | 0 | 0  | 0 | 0 | 0 | 0 | 0 | 0 | 0 | 0 | 0 | 0 | 0 | 0 | 0 | 0 | 0 |   |
|                                                                                                                                                                                                                           | 0 | 0 | 0 | 0 | 0  | 0 | 0 | 0 | 0  | 0 | 0  | 0 | 0 | 0 | 0 | 0 | 0 | 0 | 0 | 0 | 0 | 0 | 0 | 0 | 0 |   |   |
| M02255_76_000000000-ADUNE_1_1108_14636_22495                                                                                                                                                                              |   |   |   |   |    |   |   |   |    |   |    |   |   |   |   |   |   |   |   |   |   |   |   |   |   |   |   |
| T---AA---GC-AC-CGG-----CTA-A-C-----T--C--T--G--TG-C-CAG-CA-----GC-C--G-C--GG-TA-----AT--AC---AGA-GG-GT-GC-----A-AG-C-G-T-T-----A--A-TC-G-G-T---                                                                           |   |   |   |   |    |   |   |   |    |   |    |   |   |   |   |   |   |   |   |   |   |   |   |   |   |   |   |
| -----AA---G-T-C-A-----G-A-T--G--TG--A-AA-TC--C-C-CG-G-G-----CT-C-AA-----C-C-T-G-G-G-A--A-C---T-G--C-A--T--C-----T--GA-T-A--C-----T--G-T-TG--A-G-C---T-A-G-A-G-T--A--T-GT----GA-G-A-----G-G-A-A---GG-T-----AG--A--ATT---   |   |   |   |   |    |   |   |   |    |   |    |   |   |   |   |   |   |   |   |   |   |   |   |   |   |   |   |
| C-C-A-G-GT--GT-A-G-CG-GT--G---A--A-A---TG-C-GT-AG--AG-A-TC--T-G--G-A-G-G-A-AT-A-CC--GA--T--G--GC-GAA-G--G-C--A-----G--C-C-T-T---CTG--G--CA-T-A-----A-T---A-C-T--GA--CA-C-T-G--A-GG--C-T-CG-A-AA-G-C---G-TG--GG-           |   |   |   |   |    |   |   |   |    |   |    |   |   |   |   |   |   |   |   |   |   |   |   |   |   |   |   |
| T--AG-C-A-AA-----CA--GG                                                                                                                                                                                                   |   |   |   |   |    |   |   |   |    |   |    |   |   |   |   |   |   |   |   |   |   |   |   |   |   |   |   |
| Bacteria(100);Proteobacteria(100);Gammaproteobacteria(100);Pseudomonadales(100);Moraxellaceae(100);unclassified(100);unclassified(100);unclassified(100);unclassified(100);                                               |   |   |   |   |    |   |   |   |    |   |    |   |   |   |   |   |   |   |   |   |   |   |   |   |   |   |   |
| Otu1639                                                                                                                                                                                                                   | 0 | 0 | 0 | 0 | 0  | 0 | 0 | 0 | 59 | 0 | 0  | 0 | 0 | 0 | 0 | 0 | 0 | 0 | 0 | 0 | 0 | 0 | 0 | 0 | 0 | 0 |   |
|                                                                                                                                                                                                                           | 0 | 0 | 0 | 0 | 0  | 0 | 0 | 0 | 0  | 0 | 0  | 0 | 0 | 0 | 0 | 0 | 0 | 0 | 0 | 0 | 0 | 0 | 0 | 0 | 0 | 0 |   |
|                                                                                                                                                                                                                           | 0 | 0 | 0 | 0 | 0  | 0 | 0 | 0 | 0  | 0 | 0  | 0 | 0 | 0 | 0 | 0 | 0 | 0 | 0 | 0 | 0 | 0 | 0 | 0 | 0 | 0 |   |
|                                                                                                                                                                                                                           | 0 | 0 | 0 | 0 | 0  | 0 | 0 | 0 | 56 | 0 | 0  | 0 | 0 | 0 | 0 | 0 | 0 | 0 | 0 | 0 | 0 | 0 | 0 | 0 | 0 |   |   |
| M02255_76_000000000-ADUNE_1_1110_27863_13995                                                                                                                                                                              |   |   |   |   |    |   |   |   |    |   |    |   |   |   |   |   |   |   |   |   |   |   |   |   |   |   |   |
| C---GG--CT-A--ACT-----ATG-T-G-----C--C--A--G--CA-G-CCG-CG-----GT-A--A-T--AC-AT-----AG--G-----AT-GC-GA-GC-----GTTA-T-C-C-G-----G--A-TT-T-A-C-----                                                                          |   |   |   |   |    |   |   |   |    |   |    |   |   |   |   |   |   |   |   |   |   |   |   |   |   |   |   |
| ---AA---G-T-C-T-----G-G-T--G--TG--A-AA-GG--C-A-AT-T-G-----CT-T-AA-----C-G-ATT--G-T--T-----T-G--C-A--T--T-----G--GA-A-A--C-----T--G-T-AA--G-T-C---T-A-G-A-G-T--A--T-AG-----TA-G-G-----G-A-G-T---TC-T-----GG--A--ACT---C-C- |   |   |   |   |    |   |   |   |    |   |    |   |   |   |   |   |   |   |   |   |   |   |   |   |   |   |   |
| A-T-GT--GG-A-G-CG-GT--G---G--A-A---TG-C-GT-AG--AT-A-TA--T-G--G-A-G-A-AC-A-CC--AG--T--G--GC-GAA-G--G-C--G-----A--G-A-A-C---TTT--G--GC-T-A-----T-A--A-C-T--GA--CG-C-T-T--A-GG--C-T-CG-A-AA-G-T---G-TG--GG-G--               |   |   |   |   |    |   |   |   |    |   |    |   |   |   |   |   |   |   |   |   |   |   |   |   |   |   |   |
| AG-C-A-AA-----TA--GG                                                                                                                                                                                                      |   |   |   |   |    |   |   |   |    |   |    |   |   |   |   |   |   |   |   |   |   |   |   |   |   |   |   |
| Bacteria(100);Firmicutes(100);Mollicutes(100);Mycoplasmatales(100);Mycoplasmataceae(100);unclassified(100);unclassified(100);unclassified(100);unclassified(100);                                                         |   |   |   |   |    |   |   |   |    |   |    |   |   |   |   |   |   |   |   |   |   |   |   |   |   |   |   |



|                                                                                                                                                                                                                                                                                                                                                                                                                                                                                                                                                                                                                                    |   |   |   |   |    |   |   |   |    |   |   |   |   |   |   |   |   |   |   |   |   |   |   |   |   |   |   |
|------------------------------------------------------------------------------------------------------------------------------------------------------------------------------------------------------------------------------------------------------------------------------------------------------------------------------------------------------------------------------------------------------------------------------------------------------------------------------------------------------------------------------------------------------------------------------------------------------------------------------------|---|---|---|---|----|---|---|---|----|---|---|---|---|---|---|---|---|---|---|---|---|---|---|---|---|---|---|
| Otu1640                                                                                                                                                                                                                                                                                                                                                                                                                                                                                                                                                                                                                            | 0 | 0 | 0 | 0 | 0  | 0 | 0 | 0 | 15 | 0 | 0 | 0 | 0 | 0 | 0 | 0 | 0 | 0 | 0 | 0 | 0 | 0 | 0 | 0 | 0 | 0 | 0 |
|                                                                                                                                                                                                                                                                                                                                                                                                                                                                                                                                                                                                                                    | 0 | 0 | 0 | 0 | 0  | 0 | 0 | 0 | 0  | 0 | 0 | 0 | 0 | 0 | 0 | 0 | 0 | 0 | 0 | 0 | 0 | 0 | 0 | 0 | 0 | 0 | 0 |
|                                                                                                                                                                                                                                                                                                                                                                                                                                                                                                                                                                                                                                    | 0 | 0 | 0 | 0 | 0  | 0 | 0 | 0 | 0  | 0 | 0 | 0 | 0 | 0 | 0 | 0 | 0 | 0 | 0 | 0 | 0 | 0 | 0 | 0 | 0 | 0 | 0 |
|                                                                                                                                                                                                                                                                                                                                                                                                                                                                                                                                                                                                                                    | 0 | 0 | 0 | 0 | 0  | 0 | 0 | 0 | 0  | 0 | 0 | 0 | 0 | 1 | 0 | 0 | 0 | 0 | 0 | 0 | 0 | 0 | 0 | 0 | 0 | 0 | 0 |
| M02255_76_000000000-ADUNE_1_2112_20153_7675 T---AC---GT-AG-GGG-----GCA-A-G-----C-G-T---T--AT-C-CGG-AT-----TT-A-C-T-GG-GT-----GT-A---AA-GG-GA-GC-----G---C-A-----G---A-T-G-C-----AA---G-T-C-T-----G-G-A--G--TG--A-AA-GC--C-C-GG-G-G-----CT-C-AA-----C-C-C-C-G-G-G--A-C---T-G--C-T---T-T-----G--GA-A-A--C-----T-G-T-AT-G-G-C---T-A-G-A-G-T-G---C-TG---GA-G-A-----G-G-C-A--AG-C-----GG--A-ATT---C-C-T-A-GT--GT-A-G-CG-GT--G---A-A-A---TG-C-GT-AG--AT-A-TT--A-G--G-A-A-G-A-AC-A-CC--AG--T-G--GC-GAA-G--G-C-G-----G--C-T-T-G---CTG--G--AC-A-G-----T-A--A-C-T-GA--CG-T-T-C--A-GG--C-T-CG-A--AA-G-C--G-TG--GG-G--AG-C-A-AA-----CA--GG     |   |   |   |   |    |   |   |   |    |   |   |   |   |   |   |   |   |   |   |   |   |   |   |   |   |   |   |
| Bacteria(100);Firmicutes(100);Clostridia(100);Clostridiales(100);Lachnospiraceae(100);unclassified(100);unclassified(100);unclassified(100);unclassified(100);                                                                                                                                                                                                                                                                                                                                                                                                                                                                     |   |   |   |   |    |   |   |   |    |   |   |   |   |   |   |   |   |   |   |   |   |   |   |   |   |   |   |
| Otu1641                                                                                                                                                                                                                                                                                                                                                                                                                                                                                                                                                                                                                            | 0 | 0 | 0 | 0 | 12 | 0 | 0 | 0 | 0  | 0 | 0 | 0 | 0 | 0 | 0 | 0 | 0 | 1 | 0 | 0 | 0 | 0 | 0 | 0 | 0 | 0 | 0 |
|                                                                                                                                                                                                                                                                                                                                                                                                                                                                                                                                                                                                                                    | 0 | 0 | 0 | 0 | 0  | 0 | 0 | 0 | 0  | 0 | 5 | 0 | 0 | 0 | 0 | 0 | 0 | 0 | 0 | 0 | 0 | 0 | 0 | 0 | 0 | 0 | 0 |
|                                                                                                                                                                                                                                                                                                                                                                                                                                                                                                                                                                                                                                    | 0 | 0 | 0 | 0 | 1  | 0 | 0 | 0 | 0  | 0 | 0 | 0 | 0 | 0 | 0 | 0 | 0 | 0 | 0 | 0 | 0 | 0 | 0 | 6 | 0 | 0 | 0 |
|                                                                                                                                                                                                                                                                                                                                                                                                                                                                                                                                                                                                                                    | 0 | 0 | 0 | 0 | 0  | 0 | 0 | 0 | 0  | 0 | 0 | 0 | 0 | 0 | 3 | 0 | 0 | 0 | 0 | 0 | 0 | 0 | 0 | 0 | 0 | 0 | 0 |
| M02255_76_000000000-ADUNE_1_2105_15191_16657 T---AC---GA-AG-GGG-----GCT-A-G-----C-G-T---T--GC-T-CGG-AA-----TT-A-C-T-GG-GC-----GT-A---AA-G-G-GC-----G-G-C-G-----T--A-GG-----TA---G-T-C-A-----G-G-C--G--TG--A-AA-TT--C-C-TG-G-G---CT-C-AA-----C-C-T-G-G-G-G--A-C---T-G--C-G--C-T-----T--GA-T-A--C-----G--G-C-TA-G-G-C---T-A-G-A-G-G-A--T-GG---AA-G-A-----G-G-G-T--CG-C---GG--A-ATT---C-C-C-A-GT--GT-A-G-AG-GT--G---A-A-A---TT-C-GT-AG--AT-A-TT--G-G--G-A-A-G-A-AC-A-CC--GG--T-G--GC-GAA-G--G-C-G-----G--C-G-A-C--CTG--G--TC-C-A-----T-T--A-C-T-GA--CG-C-T-G--A-GG--C-G-CG-A--CA-G-C--G-TG--GG-G--AG-C-A-AA-----CA--GG                |   |   |   |   |    |   |   |   |    |   |   |   |   |   |   |   |   |   |   |   |   |   |   |   |   |   |   |
| Bacteria(100);Proteobacteria(100);Alphaproteobacteria(100);Rhodospirillales(100);Acetobacteraceae(100);unclassified(100);unclassified(100);unclassified(100);unclassified(100);                                                                                                                                                                                                                                                                                                                                                                                                                                                    |   |   |   |   |    |   |   |   |    |   |   |   |   |   |   |   |   |   |   |   |   |   |   |   |   |   |   |
| Otu1642                                                                                                                                                                                                                                                                                                                                                                                                                                                                                                                                                                                                                            | 0 | 0 | 0 | 0 | 0  | 0 | 0 | 0 | 79 | 0 | 0 | 0 | 0 | 0 | 0 | 0 | 0 | 0 | 0 | 0 | 0 | 0 | 0 | 0 | 0 | 0 | 0 |
|                                                                                                                                                                                                                                                                                                                                                                                                                                                                                                                                                                                                                                    | 0 | 0 | 0 | 0 | 0  | 0 | 0 | 0 | 0  | 0 | 0 | 0 | 0 | 0 | 0 | 0 | 0 | 0 | 0 | 0 | 0 | 0 | 0 | 0 | 0 | 0 | 0 |
|                                                                                                                                                                                                                                                                                                                                                                                                                                                                                                                                                                                                                                    | 0 | 0 | 0 | 0 | 0  | 0 | 0 | 0 | 0  | 0 | 0 | 0 | 0 | 0 | 0 | 0 | 0 | 0 | 0 | 0 | 0 | 0 | 0 | 0 | 0 | 0 | 0 |
|                                                                                                                                                                                                                                                                                                                                                                                                                                                                                                                                                                                                                                    | 0 | 0 | 0 | 0 | 0  | 0 | 0 | 0 | 0  | 0 | 0 | 0 | 0 | 0 | 0 | 0 | 0 | 0 | 0 | 0 | 0 | 0 | 0 | 4 | 0 | 0 | 0 |
| M02255_77_000000000-ADUT3_1_1101_6754_3878 T---AC---GT-AG-GGA-----GCG-A-G-----C-G-T---T--GT-C-CGG-AA-----TT-A-C-T-GG-GT-----GT-A---AA-GG-GA-GC-----G-TA-G-G-C-G-----G--G-AA-A-G-C-----AA---G-T-T-G-----G-A-A--G--TG--A-AA-TG--C-A-TG-G-G---CT-T-AA-----C-C-C-A-T-G-A--G-C---T-G--C-T---T-T-----C--AA-A-A--C-----T--G-T-TT--T-T-C---T-T-G-A-G-T-G---A-AG---TA-G-A-----G-G-C-A--GG-C---GG--A-ATT---C-C-T-A-GT--GT-A-G-CG-GT--G---A-A-A---TG-C-GT-AG--AT-A-TT--A-G--G-A-G-G-A-AC-A-CC--AG--T-G--GC-GAA-G--G-C-G-----G--C-C-T-G---CTG--G--GC-T-T-----T-A--A-C-T-GA--CG-C-T-G--A-GG--C-T-CG-A--AA-G-C--G-TG--GG-T--AG-C-A-AA-----CA--GG |   |   |   |   |    |   |   |   |    |   |   |   |   |   |   |   |   |   |   |   |   |   |   |   |   |   |   |
| Bacteria(100);Firmicutes(100);Clostridia(100);Clostridiales(100);Ruminococcaceae(100);unclassified(100);unclassified(100);unclassified(100);unclassified(100);                                                                                                                                                                                                                                                                                                                                                                                                                                                                     |   |   |   |   |    |   |   |   |    |   |   |   |   |   |   |   |   |   |   |   |   |   |   |   |   |   |   |
| Otu1643                                                                                                                                                                                                                                                                                                                                                                                                                                                                                                                                                                                                                            | 0 | 0 | 0 | 0 | 0  | 0 | 0 | 0 | 0  | 0 | 0 | 0 | 0 | 7 | 0 | 0 | 0 | 0 | 0 | 0 | 0 | 0 | 0 | 0 | 0 | 0 | 0 |
|                                                                                                                                                                                                                                                                                                                                                                                                                                                                                                                                                                                                                                    | 0 | 0 | 0 | 0 | 1  | 0 | 0 | 0 | 0  | 0 | 0 | 0 | 0 | 0 | 0 | 0 | 0 | 0 | 0 | 0 | 0 | 0 | 0 | 0 | 0 | 0 | 0 |
|                                                                                                                                                                                                                                                                                                                                                                                                                                                                                                                                                                                                                                    | 0 | 0 | 0 | 0 | 0  | 0 | 0 | 0 | 0  | 0 | 0 | 0 | 0 | 0 | 0 | 0 | 0 | 0 | 0 | 0 | 0 | 0 | 0 | 0 | 0 | 0 | 0 |
|                                                                                                                                                                                                                                                                                                                                                                                                                                                                                                                                                                                                                                    | 0 | 0 | 0 | 0 | 0  | 0 | 0 | 0 | 0  | 0 | 0 | 0 | 0 | 0 | 0 | 0 | 0 | 0 | 0 | 0 | 0 | 0 | 0 | 0 | 0 | 0 | 0 |
| M02255_77_000000000-ADUT3_1_2108_8463_21662 G---AC---AG-AG-GAT-----GCA-A-G-----C-G-T---T--AT-C-CGA-AA-----TG-A--T-T-GG-GC-----GT-A---AA                                                                                                                                                                                                                                                                                                                                                                                                                                                                                            |   |   |   |   |    |   |   |   |    |   |   |   |   |   |   |   |   |   |   |   |   |   |   |   |   |   |   |



|                                                                                                                                                                                                                            |   |   |   |    |   |   |    |    |    |   |   |   |   |   |    |   |   |   |   |   |   |   |   |   |   |   |   |
|----------------------------------------------------------------------------------------------------------------------------------------------------------------------------------------------------------------------------|---|---|---|----|---|---|----|----|----|---|---|---|---|---|----|---|---|---|---|---|---|---|---|---|---|---|---|
| Otu1645                                                                                                                                                                                                                    | 0 | 0 | 0 | 83 | 0 | 0 | 0  | 0  | 0  | 0 | 0 | 0 | 0 | 0 | 0  | 0 | 0 | 0 | 0 | 0 | 0 | 0 | 0 | 0 | 0 | 0 | 0 |
|                                                                                                                                                                                                                            | 0 | 0 | 0 | 0  | 0 | 0 | 0  | 0  | 0  | 0 | 0 | 0 | 0 | 0 | 0  | 0 | 0 | 0 | 0 | 0 | 0 | 0 | 0 | 0 | 0 | 0 | 0 |
|                                                                                                                                                                                                                            | 0 | 0 | 0 | 0  | 0 | 0 | 0  | 0  | 0  | 0 | 0 | 0 | 0 | 0 | 0  | 0 | 0 | 0 | 0 | 0 | 0 | 0 | 0 | 0 | 0 | 0 | 0 |
|                                                                                                                                                                                                                            | 0 | 0 | 0 | 0  | 0 | 0 | 0  | 0  | 0  | 0 | 0 | 0 | 0 | 0 | 29 | 0 | 0 | 0 | 0 | 0 | 0 | 0 | 0 | 0 | 0 | 0 |   |
| M02255_77_000000000-ADUT3_1_1105_6555_17898 T---AC---GT-AG-GTG-----GCA-A-G-----C-G--T--T--GT-C-CGG-AT-----TT-A--C-T--GG-GC-----GT--A-----AA-GC-GT-GC-----G-CA-G-G-C-G-----G--A-CT-T-T-T-----AA--                           |   |   |   |    |   |   |    |    |    |   |   |   |   |   |    |   |   |   |   |   |   |   |   |   |   |   |   |
| --G-T-A-G-----A-A-A--G--TG--A-AA-GG--T-T-GG-A-G-----CT-C-AA-----C-T-C-C-G-A-C--A-C---T-G--C-T--T-C-----C-TA-T-A--C-----T-G-G--GA--G-T-C---T-T-G-A-A-T-G---C-CG----GA-G-A-----G-G-A-A--GA-T-----GG--A--ACG----A-C-A-C-      |   |   |   |    |   |   |    |    |    |   |   |   |   |   |    |   |   |   |   |   |   |   |   |   |   |   |   |
| GT--GT-A-G-CG-GT--G---A--A-A---TG-C-GT-TG--AG-A-TG--T-G--T-C-G-G-A-AC-A-CC---AA--T--G--GC-GAA-A--G-C--A-----A-T-C-T-T---CTG--G--AC-G-G-----A-T---A-T-T--GA--CG-C-T-C--A-TG--C-A-CG-A--AA-G-C---T-AA--GG-T--AG-C-           |   |   |   |    |   |   |    |    |    |   |   |   |   |   |    |   |   |   |   |   |   |   |   |   |   |   |   |
| A-AA-----CA--GG Bacteria(100);unclassified(100);unclassified(100);unclassified(100);unclassified(100);unclassified(100);unclassified(100);unclassified(100);unclassified(100);                                             |   |   |   |    |   |   |    |    |    |   |   |   |   |   |    |   |   |   |   |   |   |   |   |   |   |   |   |
| Otu1646                                                                                                                                                                                                                    | 0 | 0 | 0 | 67 | 0 | 0 | 0  | 0  | 0  | 0 | 0 | 0 | 0 | 0 | 0  | 0 | 0 | 0 | 0 | 0 | 0 | 0 | 0 | 0 | 0 | 0 | 0 |
|                                                                                                                                                                                                                            | 0 | 0 | 0 | 0  | 0 | 0 | 0  | 0  | 0  | 0 | 0 | 0 | 0 | 0 | 0  | 0 | 0 | 0 | 0 | 0 | 0 | 0 | 0 | 0 | 0 | 0 | 0 |
|                                                                                                                                                                                                                            | 0 | 0 | 0 | 0  | 0 | 0 | 0  | 0  | 0  | 0 | 0 | 0 | 0 | 0 | 0  | 0 | 0 | 0 | 0 | 0 | 0 | 0 | 0 | 0 | 0 | 0 | 0 |
|                                                                                                                                                                                                                            | 0 | 0 | 0 | 0  | 0 | 0 | 0  | 0  | 0  | 0 | 0 | 0 | 0 | 0 | 0  | 0 | 0 | 0 | 0 | 0 | 0 | 0 | 0 | 0 | 0 | 0 |   |
| M02255_77_000000000-ADUT3_1_1103_10815_19532 T---AC---GA-AG-GGG-----GCT-A-G-----C-G--T--T--GC-T-CGG-AA-----TT-A--C-T--GG-GC-----GT--A-----AA-GG-GC-GC-----G-TA-G-G-C-G-----G--A-CA-G-T-T----                               |   |   |   |    |   |   |    |    |    |   |   |   |   |   |    |   |   |   |   |   |   |   |   |   |   |   |   |
| -----AA---G-T-T-G-----G-G-G--G--TG--A-AA-GC--C-C-GG-G-G-----CT-C-AA-----C-C-T-C-G-G-A--A-T---T-G--C-C---T-T-----C-AA-T-A--C-----T-G-G--CT--G-T-C---T-T-G-A-G-T-G---T-GA---GA-G-A-----G-G-T-G---TG-T-----GG--A--ACT---      |   |   |   |    |   |   |    |    |    |   |   |   |   |   |    |   |   |   |   |   |   |   |   |   |   |   |   |
| C-C-G-A-GT--GT-A-G-AG-GT--G---A--A-A---TT-C-GT-AG--AT-A-TT--C-G--G-A-A-G-A-AC-A-CC---AG--T--G--GC-GAA-G--G-C--G-----A--C-A-C-A---CTG--G--CT-C-A-----C-T---A-C-T--GA--CG-C-T-G--A-GG--C-G-CG-A--AA-G-C---G-TG--GG-          |   |   |   |    |   |   |    |    |    |   |   |   |   |   |    |   |   |   |   |   |   |   |   |   |   |   |   |
| G--AG-C-A-AA-----CA--GG Bacteria(100);Proteobacteria(100);Alphaproteobacteria(100);Caulobacterales(100);Caulobacteraceae(100);unclassified(100);unclassified(100);unclassified(100);unclassified(100);                     |   |   |   |    |   |   |    |    |    |   |   |   |   |   |    |   |   |   |   |   |   |   |   |   |   |   |   |
| Otu1647                                                                                                                                                                                                                    | 0 | 0 | 0 | 0  | 0 | 0 | 22 | 10 | 26 | 0 | 0 | 0 | 0 | 0 | 0  | 0 | 0 | 0 | 0 | 0 | 0 | 0 | 0 | 0 | 0 | 0 | 0 |
|                                                                                                                                                                                                                            | 0 | 0 | 0 | 0  | 0 | 0 | 0  | 0  | 0  | 0 | 6 | 0 | 0 | 0 | 0  | 0 | 0 | 0 | 0 | 0 | 0 | 0 | 0 | 0 | 0 | 0 | 0 |
|                                                                                                                                                                                                                            | 0 | 0 | 0 | 0  | 0 | 0 | 0  | 0  | 0  | 0 | 0 | 0 | 0 | 0 | 0  | 0 | 0 | 0 | 0 | 0 | 0 | 0 | 0 | 0 | 0 | 0 | 0 |
|                                                                                                                                                                                                                            | 0 | 0 | 0 | 0  | 0 | 0 | 0  | 0  | 0  | 0 | 0 | 0 | 0 | 0 | 0  | 0 | 0 | 0 | 0 | 0 | 0 | 0 | 0 | 0 | 0 | 0 |   |
| M02255_76_000000000-ADUNE_1_1104_20163_7171 T---CG---GC-TA-ACT-----CCG-T-GC-----C--A--G--C--AG-C-CGC-GG-----TA-A--T-A--CG-GA-----GG--A-----TC-CG-AG-CG-----T-TA-T-C-C-G-----G--A-TT-TAT-T-----AA-                          |   |   |   |    |   |   |    |    |    |   |   |   |   |   |    |   |   |   |   |   |   |   |   |   |   |   |   |
| ---G-T-C-A-----G-C-G--G--TG--A-AA-GT--C-T-GT-G-G-----CT-C-AA-----C-C-A-T-A-G-A--A-T---T-G--C-C---G-T-----T--GA-A-A--C-----T-G-G--GG--G-G-C---T-T-G-A-G-T-A--T-GT-----TT-G-A-----G-G-C-A---GG-C-----GG--A--ATG---C-G-T-G-   |   |   |   |    |   |   |    |    |    |   |   |   |   |   |    |   |   |   |   |   |   |   |   |   |   |   |   |
| GT--GT-A-G-CG-GT--G---A--A-A---TG-C-AT-AG--AT-A-TC--A-C--G-C-A-G-A-AC-C-CC---GA--T--T--GC-GAA-G--G-C--A-----G--C-C-T-G---CCA--A--GC-C-A-----T-G---A-C-T--GA--CG-C-T-G--A-TG--C-A-CG-A--AA-G-C---G-TG--GG-G--AT-C-          |   |   |   |    |   |   |    |    |    |   |   |   |   |   |    |   |   |   |   |   |   |   |   |   |   |   |   |
| A-AA-----CA--GG Bacteria(100);Bacteroidetes(100);Bacteroidia(100);Bacteroidales(100);Porphyromonadaceae(100);Parabacteroides(100);unclassified(100);unclassified(100);unclassified(100);                                   |   |   |   |    |   |   |    |    |    |   |   |   |   |   |    |   |   |   |   |   |   |   |   |   |   |   |   |
| Otu1648                                                                                                                                                                                                                    | 0 | 0 | 0 | 0  | 0 | 0 | 18 | 0  | 15 | 0 | 0 | 0 | 0 | 0 | 0  | 0 | 0 | 0 | 0 | 0 | 0 | 0 | 0 | 0 | 0 | 0 | 0 |
|                                                                                                                                                                                                                            | 0 | 0 | 0 | 0  | 0 | 0 | 0  | 0  | 0  | 0 | 0 | 0 | 0 | 0 | 0  | 0 | 0 | 0 | 0 | 0 | 0 | 0 | 0 | 0 | 0 | 0 | 0 |
|                                                                                                                                                                                                                            | 0 | 0 | 0 | 0  | 0 | 0 | 0  | 0  | 0  | 0 | 0 | 0 | 0 | 0 | 0  | 0 | 0 | 0 | 0 | 0 | 0 | 0 | 0 | 0 | 0 | 0 | 0 |
|                                                                                                                                                                                                                            | 0 | 0 | 0 | 0  | 0 | 0 | 0  | 0  | 0  | 0 | 0 | 0 | 0 | 0 | 0  | 0 | 0 | 0 | 0 | 0 | 0 | 0 | 0 | 0 | 0 | 0 |   |
| M02255_76_000000000-ADUNE_1_1101_18729_15257 T---AC---GT-AG-GGG-----GCA-A-G-----C-G--T--T--AT-C-CGG-AT-----TT-A--C-T--GG-GT-----GT--A-----AA-GG-GA-GC-----G---G---C-----A--T-GA-T-----                                     |   |   |   |    |   |   |    |    |    |   |   |   |   |   |    |   |   |   |   |   |   |   |   |   |   |   |   |
| -AA---G-T-C-T-----G-A-T--G--TG--A-AA-AC--C-C-AA-G-G-----CT-C-AA-----C-C-A-T-G-G-G--A-C---T-G--C-A--T-T-----G--GA-A-A--C-----T-G-T--CG--T-G-C---T-G-G-A-G-T-G---T-CG----GA-G-A-----G-G-T-A--AG-C-----GG--A--ATT---C-C-      |   |   |   |    |   |   |    |    |    |   |   |   |   |   |    |   |   |   |   |   |   |   |   |   |   |   |   |
| T-A-GT--GT-A-G-CG-GT--G---A--A-A---TG-C-GT-AG--AT-A-TT--A-G--G-A-G-G-A-AC-A-CC---AG--T--G--GC-GAA-G--G-C--G-----G--C-T-T-A---CTG--G--AC-G-A-----T-G---A-C-T--GA--CG-C-T-G--A-GG--C-T-CG-A--AA-G-C---G-TG--GG-G--           |   |   |   |    |   |   |    |    |    |   |   |   |   |   |    |   |   |   |   |   |   |   |   |   |   |   |   |
| AG-C-A-AA-----CA--GG Bacteria(100);Firmicutes(100);Clostridia(100);Clostridiales(100);Lachnospiraceae(100);unclassified(100);unclassified(100);unclassified(100);unclassified(100);                                        |   |   |   |    |   |   |    |    |    |   |   |   |   |   |    |   |   |   |   |   |   |   |   |   |   |   |   |
| Otu1649                                                                                                                                                                                                                    | 0 | 0 | 0 | 0  | 0 | 0 | 0  | 0  | 0  | 0 | 0 | 0 | 0 | 0 | 0  | 0 | 0 | 0 | 0 | 0 | 0 | 0 | 0 | 0 | 0 | 0 | 0 |
|                                                                                                                                                                                                                            | 0 | 0 | 0 | 0  | 0 | 0 | 0  | 0  | 0  | 0 | 0 | 0 | 0 | 0 | 0  | 0 | 0 | 0 | 0 | 0 | 0 | 0 | 0 | 0 | 0 | 0 | 0 |
|                                                                                                                                                                                                                            | 0 | 0 | 0 | 0  | 0 | 0 | 0  | 0  | 0  | 0 | 0 | 0 | 0 | 7 | 0  | 0 | 0 | 0 | 0 | 0 | 0 | 0 | 0 | 0 | 0 | 0 | 0 |
|                                                                                                                                                                                                                            | 0 | 0 | 0 | 0  | 0 | 0 | 0  | 0  | 0  | 0 | 0 | 0 | 0 | 0 | 0  | 0 | 0 | 0 | 0 | 0 | 0 | 4 | 0 | 0 | 0 | 0 |   |
| M02255_77_000000000-ADUT3_1_1101_3866_9648 T---AC---GT-AG-GGT-----GCG-A-G-----C--G--T--T--GT-C-CGG-AA-----TT-A--T-T--GG-GC-----GT--A-----AA-GA-GC-TC-----G-TA-G-G-C-G-----G--T-CT-G-T-C-----GC-                            |   |   |   |    |   |   |    |    |    |   |   |   |   |   |    |   |   |   |   |   |   |   |   |   |   |   |   |
| ---G-T-C-G-----A-T-C--G--TG--A-AA-AC--T-T-GG-G-G-----CT-T-AA-----C-C-C-T-G-A-G--C-T---T-G--C-G---G-T-----C--GA-T-A--C-----G--G-G--CAT-G-A-C---T-G-G-A-G-T--T---C-GG----CA-G-G-----G-G-A-G---AC-T-----GG--A--ATT---C-C-T-G- |   |   |   |    |   |   |    |    |    |   |   |   |   |   |    |   |   |   |   |   |   |   |   |   |   |   |   |
| GT--GT-A-G-CG-GT--G---A--A-A---TG-C-GC-AG--AT-A-TC--A-G--G-A-G-G-A-AC-A-CC---GG--T--G--GC-GAA-G--G-C--G-----G--G-T-C-T---CTG--G--GC-C-G-----A-T---A-C-T--GA--CG-C-T-G--A-GG--A-G-CG-A--AA-G-C---G-TG--GG-G--AG-            |   |   |   |    |   |   |    |    |    |   |   |   |   |   |    |   |   |   |   |   |   |   |   |   |   |   |   |
| C-G-AA-----CA--GG Bacteria(100);Actinobacteria(100);Actinobacteria(100);Actinobacteridae(100);Actinomycetales(100);Pseudonocardineae(100);Pseudonocardiaceae(100);Pseudonocardia(100);unclassified(100);                   |   |   |   |    |   |   |    |    |    |   |   |   |   |   |    |   |   |   |   |   |   |   |   |   |   |   |   |



Otu1650 3 0 0 0 0 0 0 0 0 0 0 0 0 0 0 0 0 0 0 0 0 0 0 0 1 0 0  
0 0 0 0 0 0 0 0 0 0 0 0 0 0 0 0 0 0 0 0 0 0 0 0 0 0 0  
0 0 0 0 0 0 0 0 0 0 0 0 0 0 0 0 5 0 0 0 0 0 0 0 0 0 0  
0 5 0 0 0 0 0 0 0 0 0 0 0 0 0 0 0 0 0 0 0 0 0 0 0 0 0  
M02255\_77\_000000000-ADUT3\_1\_2117\_6779\_9115 C---TC---CG-TG-CCA-----GCAGCCG-----CG-G--T---A--AT-A-CGG-AG-----GG-T--G-C--AA-GC-----GT--T----AT-CC-G--GA-----T-TC-A-C-T-G-----G--G-TT-G-G-T-----  
AA---G-T-C-A-----G-T-G--G-TG--A-AA-TC--T-C-CG-T-G----CT-T-AA-----C-A-T-G-G-A-A--A-C---T-G--C-C---A--T-----T--GA-T-A--C-----T--A-C--TG--G-T-C---T-T-G-A-A-T--T---T-TC-----TG-G-A-----G-G-T-A---AG-C-----GG--A--ATA---T-G-T-C-  
AT--GT-A-G-CG-GT--G---A--A---TG-C-TT-AG--AT-A-TG--A-C--A-T-A-G-A-AC-A-CC---AA--T-T--GC-GAA-G--G-C-A-----G--C-T-T-A--CTA--C--AG-G-G-----A-T---A-T-T--GA--CA-C-T-G--A-GG--C-A-CG-A--AA-G-C---G-TG--GG-G--AT-C-  
A-AA-----CA--GG Bacteria(100);Bacteroidetes(100);Sphingobacteria(100);Sphingobacteriales(100);Chitinophagaceae(100);unclassified(100);unclassified(100);unclassified(100);unclassified(100);

Otu1651 0 0 0 0 0 0 0 0 0 22 0 0 0 0 0 0 0 0 0 0 0 0 0 0 0 0 0  
0 0 0 0 0 0 0 0 0 0 0 0 0 0 0 0 0 0 0 0 0 0 0 0 0 0 0  
0 0 0 0 0 0 0 0 0 0 0 0 0 0 0 0 0 0 0 0 0 0 0 0 0 0 0  
0 0 0 0 0 0 0 0 0 0 0 0 0 0 0 0 0 0 0 0 0 0 0 0 0 0 0  
M02255\_77\_000000000-ADUT3\_1\_1103\_3735\_19287 T---AC---GT-AG-GGG-----GCA-A-G-----C--G--T---T--AT-C-CGG-AA-----TT-A--T-T--GG-GC-----GT--A-----AA-GA-GT-GC-----G-TA-G-G-T-G-----G--T-TA-C-C-T-----AA-  
---G-C-G-C-----A-G-G--G-TA--T-AA-GG--C-A-AT-G-G----CT-C-AA-----C-C-A-T-T-G-T-T-----G-G--C-C---C--T-----G--CG-A-A--C-----T--G-G--GC-T-A-C---T-T-G-A-G-T-G---C-AG---GA-G-A-----G-G-A-A---AG-C-----GG--A--ATT---C-C-T-A-  
GT--GT-A-G-CG-GT--G---A--A---TG-C-GT-AG--AT-A-TT--A-G--G-A-G-G-A-AC-A-CC---AG--T--G--GC-GAA-G--G-C-G-----G--C-T-T-T--CTG--G--AC-T-G-----T-A---A-C-T--GA--CA-C-T-G--A-GG--C-A-CG-A--AA-G-C---G-TG--GG-G--AG-  
C-A-AA-----CA--GG Bacteria(100);Firmicutes(100);Clostridia(100);Clostridiales(100);Family\_XIII\_Incertae\_Sedis(100);unclassified(100);unclassified(100);unclassified(100);unclassified(100);

Otu1652 0 0 0 74 0 0 0 0 0 0 0 0 0 0 0 0 0 0 0 0 0 0 0 0 0 0 0  
0 0 0 0 0 0 0 0 0 0 0 0 0 0 0 0 0 0 0 0 0 0 0 0 0 0 0  
0 0 0 0 0 0 0 0 0 0 0 0 0 0 0 0 0 0 0 0 0 0 0 0 0 0 0  
0 0 0 0 0 0 0 0 0 0 0 0 0 0 0 0 0 0 0 0 0 0 0 0 0 0  
M02255\_77\_000000000-ADUT3\_1\_1101\_19494\_14229 T---AC---GG-AG-GGG-----GCA-A-G-----C--G--T---T--GT-T-CGG-AT-----TT-A--C-T--GG-GC-----GT--A-----AA-GG-GC-GC-----G-TA-G-G-C-G-----G--T-TT-A-G-C-----  
-----AA---G-T-C-A-----C-T-T--G--TG--A-AA-TC--T-T-TG-G-G----CT-T-AA-----C-T-C-A-A-A-G--C-G---G-C--C-A--A-G-----T--GA-T-A--C-----T--G-C--TA--G-A-C---T-A-G-A-G-T-G---C-AG---AA-G-G-----G-G-C-A---AT-C-----GG--A--ATT---C-C-  
T-T-G-GT--GT-A-G-CG-GT--G---A--A---TG-C-GT-AG--AT-A-TC--A-A--G-A-G-G-A-AC-A-CC---TG--A--G--GC-GAA-G--G-C-G-----G--A-T-T-G---CTG--G--GC-T-G-----A-C---A-C-T--GA--CG-C-T-G--A-GG--C-G-CG-A--AA-G-C---T-AG--GG-  
T--AG-C-A-AA-----CG--GG Bacteria(100);Acidobacteria(100);Acidobacteria(100);Acidobacteriales(100);Acidobacteriaceae(100);Candidatus\_Chloroacidobacterium(100);unclassified(100);unclassified(100);unclassified(100);

Otu1653 0 0 0 0 0 1 0 0 0 0 0 0 0 0 0 0 0 0 0 0 0 0 0 0 0 0 0  
0 0 0 0 0 0 0 0 0 0 0 0 0 0 0 0 0 0 0 0 0 0 0 23 0 0 0  
0 0 0 0 0 0 0 0 0 0 0 0 0 0 0 0 0 0 0 0 0 0 0 0 0 0 0  
0 0 0 0 0 0 0 0 0 0 0 0 0 0 0 0 0 0 0 0 0 0 0 0 0 0 0  
M02255\_76\_000000000-ADUNE\_1\_1102\_11928\_6867 C---TA---AC-TC-TGT-----GCC-A-G-----C----A--G--CC-G-CGG-TA-----AT-A--C-A--GA-GG-----GT--G-----CA--A-GC-G-----T-TA-A-T-C-G-----G--A-AC-A-A-T-----AA---  
G-T-T-T-----G-A-T--G--TG--A-AA-GC--C-C-TG-G-G----CT-T-AA-----C-C-T-G-G-G-A--A-T---G-G--C-G---T--T-----G--AA-G-A--C-----T--G-T--TG--T-T-C---T-A-G-A-G-T--T---T-GA-----CA-G-A-----G-G-G-T---CG-T-----GG--A--ATT---T-C-C-G-GT--  
GT-A-G-CG-GT--G---A--A---TG-C-GT-AG--AG-A-TC--G-G--A-A-A-G-A-AC-A-CC---AG--T--G--GC-GAA-G--G-C-G-----G--C-G-A-C---CTG--G--GT-C-T-----A-A---A-C-T--GA--CA-C-T-G--A-GG--T-G-CG-A--AA-G-C---G-TG--GG-G--AG-C-A-  
AA-----CA--GG Bacteria(100);Proteobacteria(100);unclassified(100);unclassified(100);unclassified(100);unclassified(100);unclassified(100);unclassified(100);

Otu1654 0 0 0 0 7 0 0 0 0 0 0 0 0 0 0 0 0 0 0 0 0 0 0 0 0 0 0  
0 0 0 0 0 0 0 0 0 0 0 0 0 0 0 0 0 0 0 0 0 0 0 0 0 0 0  
0 0 0 0 0 0 0 0 0 0 0 0 0 0 0 0 0 0 0 0 0 0 0 0 0 0 0  
0 0 0 0 0 0 0 0 0 0 0 0 0 0 0 0 0 0 0 0 0 0 0 0 0 0  
M02255\_76\_000000000-ADUNE\_1\_2105\_15891\_16502 T---AC---GT-AG-GGT-----GCA-A-G-----C--G--T---T--AA-T-CGG-AA-----TT-A--C-T--GG-GC-----GT--A-----AA-GC-GT-GC-----G-CA-G-G-C-G-----G--T-AA-T-G-T-----  
-----AA---G-A-C-A-----G-A-T--G--TG--A-AA-TC--C-C-CG-G-G----CT-C-AA-----C-C-T-G-G-G-A--A-C---T-G--C-A---T--T-----T--GT-G-A--C-----T--G-C--AT--T-G-C---T-G-G-A-G-T--G---C-GG---CA-G-A-----G-G-G-G---GA-T-----GG--A--ATT---  
C-C-G-C-GT--GT-A-G-CA-GT--G---A--A---TG-C-GT-AG--AT-A-TG--C-G--G-A-G-G-A-AC-A-CC---GA--T--G--GC-GAA-G--G-C-A-----A--T-C-C-C---CTG--G--GC-C-T-----G-C---A-C-T--GA--CG-C-T-C--A-TG--C-A-CG-A--AA-G-C---G-TG--GG-  
G--AG-C-A-AA-----CA--GG Bacteria(100);Proteobacteria(100);Betaproteobacteria(100);Burkholderiales(100);Comamonadaceae(100);unclassified(100);unclassified(100);unclassified(100);unclassified(100);



Otu1655      0      0      0      0      0      1      0      0      0      0      0      0      0      0      0      0      0      0      0      0      0      0      0      0      0      0      0  
             0      1      4      1      0      0      0      0      0      6      22      1      0      0      0      0      0      115      0      0      0      0      0      0      0      0      0      0  
             0      0      0      0      0      0      0      0      0      0      0      0      0      0      0      0      0      0      0      0      0      0      0      0      0      0      0      0  
             0      0      0      0      0      0      0      0      0      0      0      0      0      0      0      0      0      0      0      0      0      0      0      0      0      0      0  
             M02255\_77\_000000000-ADUT3\_1\_1104\_4510\_16214 T---AC---GA-GA-GGC-----CCG-A-G-----C--G--T---T-AA-T-CGG-AA-----TC-A--C-T--GG-GC-----TT--A----AA-GG-GT-GC-----G-TA-G-G-C-G-----G--A-GC-C-G-C-----  
AA----G-T-G-T-----C-C-T--G--TG--A-AA-TC--C-C-CC-G-T----CT-C-AA-----T-C-G-G-G-G-A-A-T---G-G--C-G--G--G-----G--CA-T-A--C-----T--G-C--GG--T-T-C---T-T-G-A-G-G--C---G-GG----TA-G-G-----G-G-T-T---GT-C-----GG--A--ACG---C-T-C-  
G-GT--GG-A-G-CG-GT--G---A--A---TG-C-GT-AG--AT-A-TC--G-A--G-C-G-G-A-AC-G-CC---GA--T--G--GC-GAA-A--G-C--A-----G--A-C-A-A---CTG--G--GC-C-C-----G-T---C-C-T--GA--CG-C-T-G--A-GG--C-A-CG-A--AA-G-C---G-TG--GG-G--  
AG-C-A-AA-----CA--GG      Bacteria(100);unclassified(100);unclassified(100);unclassified(100);unclassified(100);unclassified(100);unclassified(100);unclassified(100);unclassified(100);

Otu1656      0      0      0      0      0      1      0      0      0      0      0      0      0      0      0      0      0      0      0      0      0      0      0      0      0      0      0  
             0      0      0      0      0      0      0      0      0      0      0      0      0      0      0      0      0      0      0      0      25      0      0      0      0      1      0      0  
             0      0      0      0      0      0      0      0      0      0      0      0      0      0      0      0      0      0      0      0      0      0      0      0      0      0      0  
             0      0      0      0      0      0      0      0      0      0      0      0      0      0      0      0      0      0      0      0      0      0      0      0      0      0      0  
             M02255\_76\_000000000-ADUNE\_1\_1109\_21110\_22627      C---GG--CT-A--ACT-----ACG-T-G-----C--C--A--G--CA-G-CCG-CG-----GT-A--A-T--AC-GT-----AG--G----GT-GC-AA-GC-----GTTA-A-T-C-G-----G--A-CC-G-C-T-----  
-----AA---G-A-C-A-----G-A-T--G--TG--A-AA-TC--C-C-CG-G-G---CT-T-AA-----C-C-T-G-G-G-A-A-C---T-G--C-A---T-T-----T--GT-G-A--C-----T--G-G--CG--G-G-C---T-A-G-A-G-T-A---T-GG----CA-G-A-----G-G-G-G---GG-T-----AG--A--ATT---C-  
C-A-C-GT--GT-A-G-CA-GT--G---A--A---TG-C-GT-AG--AG-A-TG--T-G--G-A-G-G-A-AT-A-CC---GA--T--G--GC-GAA-G--G-C--A-----G--C-C-C-C---CTG--G--GC-C-A-----A-T---A-C-T--GA--CG-C-T-C--A-TG--C-A-CG-A--AA-G-C---G-TG--GG-G-  
-AG-C-A-AA-----CA--GG      Bacteria(100);Proteobacteria(100);Betaproteobacteria(100);unclassified(100);unclassified(100);unclassified(100);unclassified(100);unclassified(100);unclassified(100);

Otu1657      0      0      0      67      0      0      0      0      0      0      0      0      0      0      0      0      0      0      0      0      0      0      0      0      0      0      0  
             0      0      0      0      0      0      0      37      0      0      0      0      0      0      0      0      0      0      0      0      0      0      0      0      0      0      0  
             0      0      0      0      0      0      0      0      0      0      0      0      0      0      0      0      0      0      0      0      0      0      0      0      0      0      0  
             0      0      0      0      0      0      0      0      0      0      0      0      0      0      0      0      0      0      0      0      0      0      0      0      0      0      0  
             M02255\_77\_000000000-ADUT3\_1\_1101\_21628\_12209      T---AC---GT-AG-GTG-----GCA-A-G-----C--G--T---T--GT-C-CGG-AT-----TT-A--C-T--GG-GC-----GT--A----AA-GG-GC-AA-----G-CA-G-G-C-G-----G--A-CT-G-T-T-----  
-----AA---G-T-A-G-----G-A-A--G--TG--A-AA-GG--T-C-GG-A-G-----CT-C-AA-----C-T-C-C-A-A-C--A-T---T-G--C-T---C--C-----C--TA-T-A--C-----T--G-G--CA--G-T-C---T-T-G-A-G-T-C---T-CG----GA-G-A-----G-G-A-A--AG-C-----GG--A--ACG---A-  
T-A-C-GT--GT-A-G-CG-GT--G---A--A---TG-C-GT-TG--AT-A-TG--T-A--T-C-G-G-A-AC-A-CC---AA--T--G--GC-GAA-G--G-C--A-----G--C-T-T-T---CTG--G--AC-G-A-----G-A---A-C-T--GA--CG-C-T-C--A-TT--T-G-CG-A--AA-G-C---C-GA--GG-T--  
AG-C-G-AA-----CA--GG      Bacteria(100);Candidate\_division\_OP10(100);unclassified(100);unclassified(100);unclassified(100);unclassified(100);unclassified(100);unclassified(100);unclassified(100);

Otu1658      0      0      0      0      0      0      0      0      48      0      0      0      0      0      0      0      0      0      0      0      0      0      0      0      0      0      0  
             0      0      0      0      0      0      0      0      0      0      0      0      0      0      0      0      0      0      0      0      0      0      0      0      0      0      0  
             0      0      0      0      0      0      0      0      0      0      0      0      0      0      0      0      0      0      0      0      0      0      0      0      0      0      0  
             0      0      0      0      0      0      0      0      0      0      0      0      0      0      0      0      0      0      0      0      0      0      0      0      0      0      0  
             M02255\_77\_000000000-ADUT3\_1\_1110\_9886\_6363      T---AC---GT-AG-GTG-----GCA-A-G-----C--G--T---T--GT-C-CGG-AT-----TT-A--C-T--GG-GT-----GT--A----AA-GG-GC-GC-----G-TA-G-G-C-G-----G--G-GA-G-A-C-----  
AA---G-T-C-A-----G-A-T--G--TG--A-AA-TC--T-A-TG-G-G-----CT-T-AA-----C-C-C-A-T-A-A--A-C---T-G--C-A---T-T-----T--GA-A-A--C-----T--A-T--TT--C-T-C---T-T-G-A-G-T-G---A-TG----GA-G-A-----G-G-C-A--AG-C-----GG--A--ATT---C-C-T-A-  
GT--GT-A-G-CG-GT--G---A--A---TG-C-GT-AG--AT-A-TT--A-G--G-A-G-G-A-AC-A-CC---AG--T--G--GC-GAA-G--G-C--G-----G--C-T-T-G---CTG--G--AC-A-T-----T-A---A-C-T--GA--CG-C-T-G--A-GG--C-G-CG-A--AA-G-C---G-TG--GG-G--AG-  
C-A-AA-----CA--GG      Bacteria(100);Firmicutes(100);Clostridia(100);Clostridiales(100);Ruminococcaceae(100);unclassified(100);unclassified(100);unclassified(100);unclassified(100);

Otu1659      0      0      0      0      5      0      0      0      0      0      0      0      0      0      0      0      0      0      0      0      0      0      0      0      0      0      0  
             0      0      0      0      0      0      0      0      0      0      0      0      0      0      0      0      0      0      0      0      0      0      0      0      0      0      0  
             0      0      0      0      0      0      0      0      0      0      0      0      0      0      0      0      0      0      0      0      0      0      0      0      0      0      0  
             0      0      0      0      0      0      0      0      0      0      0      0      0      0      0      0      0      3      0      0      0      0      0      0      0      0      0  
             M02255\_76\_000000000-ADUNE\_1\_1101\_15009\_23295      G---AA---GA-AG-CAC-----CGG-C-T-----A--A-C---T--CC-G-TGC-CA-----GC-A--G-C--CG-CG-----GT--A----AT-AC-GG-A-----G-GG-T-G-C-A-----A--G-CT-G-T-T-----  
-----AA---G-T-C-G-----G-A-A--G--TG--A-AA-TC--C-C-CG-G-G---CT-C-AA-----C-C-T-G-G-G-A-A-C---T-G--C-A---T-T-----C--GA-A-A--C-----T--G-G--CA--G-G-C---T-A-G-A-G-T-C---T-TG----TA-G-A-----G-G-G-G---GG-T-----AG--A--ATT---C-  
C-A-G-GT--GT-A-G-CG-GT--G---A--A---TG-C-GT-AG--AG-A-TC--T-G--G-A-G-G-A-AT-A-CC---GG--T--G--GC-GAA-G--G-C--G-----G--C-C-C-C---CTG--G--AC-A-A-----A-G---A-C-T--GA--CG-C-T-C--A-GG--T-G-CG-A--AA-G-C---G-TG--GG-  
G--AG-C-A-AA-----CA--GG      Bacteria(100);Proteobacteria(100);Gammaproteobacteria(100);Enterobacteriales(100);Enterobacteriaceae(100);Enteric\_Bacteria\_cluster(100);unclassified(100);unclassified(100);unclassified(100);



[illegible]



|                                                                                                                                                                                                                   |   |   |   |    |    |   |   |   |   |   |   |   |   |    |    |   |   |   |   |   |   |   |   |   |   |   |  |
|-------------------------------------------------------------------------------------------------------------------------------------------------------------------------------------------------------------------|---|---|---|----|----|---|---|---|---|---|---|---|---|----|----|---|---|---|---|---|---|---|---|---|---|---|--|
| Otu1665                                                                                                                                                                                                           | 0 | 0 | 0 | 17 | 0  | 0 | 0 | 0 | 0 | 0 | 0 | 0 | 0 | 0  | 0  | 0 | 0 | 0 | 0 | 2 | 0 | 0 | 0 | 0 | 0 | 0 |  |
|                                                                                                                                                                                                                   | 0 | 0 | 0 | 0  | 0  | 0 | 0 | 0 | 0 | 3 | 0 | 0 | 2 | 20 | 0  | 1 | 0 | 0 | 0 | 0 | 0 | 0 | 1 | 0 | 0 | 0 |  |
|                                                                                                                                                                                                                   | 0 | 0 | 0 | 0  | 0  | 0 | 0 | 0 | 0 | 0 | 0 | 0 | 0 | 2  | 6  | 0 | 0 | 0 | 0 | 0 | 0 | 0 | 0 | 0 | 0 | 0 |  |
|                                                                                                                                                                                                                   | 0 | 0 | 0 | 2  | 9  | 0 | 0 | 0 | 0 | 0 | 0 | 0 | 0 | 0  | 0  | 0 | 0 | 0 | 2 | 0 | 0 | 0 | 0 | 0 | 0 | 0 |  |
| M02255_77_000000000-ADUT3_1_1116_17839_10608 T---AA--CT-AC-GTG-----CC-A-G-----C--A-G--C-CG-C-GGT-AA-----TA-C-G-T-AG-GT-----CC-C---GA-GC-G--TT-----G-TC-C-G--G-----A-T-TT-A-T-T-----                               |   |   |   |    |    |   |   |   |   |   |   |   |   |    |    |   |   |   |   |   |   |   |   |   |   |   |  |
| -AA---G-T-C-T-----G-G-T--G--TA--A-AA-GG--C-A-GT-G-G----CT-C-AA-----C-C-A-T-T-G-T-A----T-G--C-A--T-T-----G--GA-A-A--C-----T-G-G--TA-G-A-C---T-T-G-A-G-T-G--C-AG----GA-G-A-----G-G-A-G--AG-T-----GG--A-ATT---C-C-   |   |   |   |    |    |   |   |   |   |   |   |   |   |    |    |   |   |   |   |   |   |   |   |   |   |   |  |
| A-T-GT--GT-A-G-CG-GT--G---A-A-A---TG-C-GT-AG--AT-A-TA--T-G--G-A-G-G-A-AC-A-CC--GG--T-G--GC-GAA-A-G-C-G-----G-C-T-C-T---CTG--G--CC-T-G-----T-A--A-C-T-GA-CA-C-T-G--A-GG--C-T-CG-A-AA-G-C--G-TG--GG-G--             |   |   |   |    |    |   |   |   |   |   |   |   |   |    |    |   |   |   |   |   |   |   |   |   |   |   |  |
| AG-C-A-AA-----CA--GG Bacteria(100);Firmicutes(100);Bacilli(100);Lactobacillales(100);Streptococcaceae(100);Lactococcus(100);unclassified(100);unclassified(100);unclassified(100);                                |   |   |   |    |    |   |   |   |   |   |   |   |   |    |    |   |   |   |   |   |   |   |   |   |   |   |  |
| Otu1666                                                                                                                                                                                                           | 0 | 0 | 0 | 0  | 88 | 0 | 0 | 0 | 0 | 0 | 0 | 0 | 0 | 0  | 0  | 0 | 0 | 0 | 0 | 0 | 1 | 0 | 0 | 0 | 0 | 0 |  |
|                                                                                                                                                                                                                   | 0 | 0 | 0 | 0  | 0  | 0 | 0 | 0 | 0 | 0 | 0 | 0 | 0 | 0  | 0  | 0 | 0 | 0 | 0 | 0 | 0 | 0 | 0 | 0 | 0 | 0 |  |
|                                                                                                                                                                                                                   | 0 | 0 | 0 | 0  | 0  | 0 | 0 | 0 | 0 | 0 | 0 | 0 | 0 | 0  | 0  | 0 | 0 | 0 | 0 | 0 | 0 | 0 | 0 | 0 | 0 | 0 |  |
|                                                                                                                                                                                                                   | 0 | 0 | 0 | 0  | 0  | 0 | 0 | 0 | 0 | 0 | 0 | 0 | 0 | 0  | 0  | 0 | 0 | 0 | 0 | 0 | 0 | 0 | 0 | 0 | 0 | 0 |  |
| M02255_76_000000000-ADUNE_1_1102_23868_15546 C---TA--AC-TC-TGT-----GCC-A-G-----C---A--G--CC-G-CGG-TA-----AT-A-C-A-GA-GG-----GT-----GC-TA-GC-G-----T-TA-A-T-C-G-----G--A-TT-G-A-T-----                             |   |   |   |    |    |   |   |   |   |   |   |   |   |    |    |   |   |   |   |   |   |   |   |   |   |   |  |
| --AA---G-T-C-G-----G-T-T--G--TG--A-AA-GC--C-C-CG-G-G----CT-C-AA-----C-C-T-G-G-G-A-A-T---T-G--C-G--G--C-----C-GA-T-A--C-----T-G-T--CA--G-A-C---T-A-G-A-A-A-A--C-GG---TA-G-A-----G-G-G-A--GG-T-----GG--A-ACT---C-C- |   |   |   |    |    |   |   |   |   |   |   |   |   |    |    |   |   |   |   |   |   |   |   |   |   |   |  |
| A-G-GT--GT-A-G-CG-GT--G---A-A-A---TG-C-GT-AG--AT-A-TC--T-G--G-A-G-A-AC-A-CC--GA--T-G--GC-GAA-G-G-C-A-----G-C-C-T-C---CTG--G--GC-C-T-----G-T---T-T-T-GA-CG-C-T-G--A-GG--C-A-CG-A-AA-G-C--G-TG--GG-T--              |   |   |   |    |    |   |   |   |   |   |   |   |   |    |    |   |   |   |   |   |   |   |   |   |   |   |  |
| AG-C-A-AA-----CA--GG Bacteria(100);Proteobacteria(100);Gammaproteobacteria(100);Xanthomonadales(100);Sinobacteraceae(100);Nevskia(100);unclassified(100);unclassified(100);unclassified(100);                     |   |   |   |    |    |   |   |   |   |   |   |   |   |    |    |   |   |   |   |   |   |   |   |   |   |   |  |
| Otu1667                                                                                                                                                                                                           | 0 | 0 | 0 | 0  | 0  | 0 | 0 | 0 | 0 | 0 | 0 | 0 | 0 | 2  | 0  | 0 | 0 | 0 | 0 | 0 | 0 | 0 | 0 | 0 | 0 | 0 |  |
|                                                                                                                                                                                                                   | 0 | 0 | 0 | 0  | 0  | 0 | 0 | 9 | 0 | 0 | 0 | 0 | 0 | 0  | 17 | 0 | 0 | 0 | 0 | 0 | 0 | 0 | 0 | 0 | 0 | 0 |  |
|                                                                                                                                                                                                                   | 0 | 0 | 0 | 0  | 0  | 0 | 0 | 0 | 0 | 0 | 0 | 0 | 0 | 0  | 0  | 0 | 0 | 0 | 0 | 0 | 0 | 0 | 0 | 0 | 0 | 8 |  |
|                                                                                                                                                                                                                   | 3 | 0 | 0 | 0  | 0  | 0 | 0 | 0 | 0 | 0 | 0 | 0 | 0 | 0  | 0  | 0 | 0 | 0 | 0 | 0 | 0 | 0 | 0 | 2 | 0 | 0 |  |
| M02255_76_000000000-ADUNE_1_2106_16997_11159 A---AG---TC-AC-GGC-----TAA-C-T-----A-C-G---T--GC-C-AGC-AG-----CC-G--C-G-GT-AA-----TA-C---GT-AG-GT-GA-----C-AA-GCG-T-T-----G--T-CC-G-GAT-----                         |   |   |   |    |    |   |   |   |   |   |   |   |   |    |    |   |   |   |   |   |   |   |   |   |   |   |  |
| -----AA---G-T-C-T-----G-A-T--G--TG--A-AA-GC--C-C-AC-G-G----CT-C-AA-----C-C-G-T-G-G-A-A-C---G-G-C-A--T-T-----G--GA-A-A--C-----T-G-G--CG--G-A-C---T-T-G-A-A-T-G--T-AG---CA-G-A-----G-G-A-A--AG-T-----GG--A-ATT---   |   |   |   |    |    |   |   |   |   |   |   |   |   |    |    |   |   |   |   |   |   |   |   |   |   |   |  |
| C-C-A-T-GT--GT-A-G-CG-GT--G---G-A-A---TG-C-GT-AG--AT-A-TA--T-G--G-A-G-G-A-AC-A-CC--AG--T-G--GC-GAA-A-G-C-G-----A-C-T-T-T---CTG--G--GC-T-A-----T-G---A-T-T-GA-CG-C-T-G--A-GG--C-T-CG-A-AA-G-C--G-TG--GG-           |   |   |   |    |    |   |   |   |   |   |   |   |   |    |    |   |   |   |   |   |   |   |   |   |   |   |  |
| G--AG-C-G-AA-----CA--GG Bacteria(100);Firmicutes(100);Bacilli(100);Lactobacillales(100);Carnobacteriaceae(100);Alloiococcus(100);unclassified(100);unclassified(100);unclassified(100);                           |   |   |   |    |    |   |   |   |   |   |   |   |   |    |    |   |   |   |   |   |   |   |   |   |   |   |  |
| Otu1668                                                                                                                                                                                                           | 0 | 0 | 0 | 0  | 0  | 0 | 0 | 0 | 0 | 0 | 0 | 0 | 0 | 0  | 0  | 0 | 0 | 0 | 0 | 2 | 0 | 0 | 0 | 0 | 0 | 0 |  |
|                                                                                                                                                                                                                   | 0 | 0 | 0 | 0  | 0  | 0 | 0 | 0 | 0 | 0 | 0 | 0 | 0 | 0  | 0  | 0 | 0 | 0 | 0 | 0 | 0 | 0 | 0 | 0 | 0 | 0 |  |
|                                                                                                                                                                                                                   | 0 | 0 | 0 | 0  | 0  | 0 | 0 | 0 | 0 | 0 | 0 | 0 | 0 | 17 | 18 | 0 | 0 | 0 | 0 | 0 | 0 | 0 | 0 | 0 | 0 | 3 |  |
|                                                                                                                                                                                                                   | 0 | 0 | 0 | 0  | 0  | 0 | 0 | 0 | 0 | 0 | 0 | 0 | 0 | 0  | 0  | 0 | 0 | 0 | 0 | 0 | 0 | 0 | 0 | 0 | 0 | 0 |  |
| M02255_77_000000000-ADUT3_1_2114_9373_10246 C---GT---GC-CA-GCA-----GCC-G-C-----G--G-T---A--AT-A-CGG-AG-----GA-T--G-C-GA-GC-----GT--T---AT-CC-GG-AT-----                                                           |   |   |   |    |    |   |   |   |   |   |   |   |   |    |    |   |   |   |   |   |   |   |   |   |   |   |  |



Otu1670 0 0 0 0 0 0 0 14 0 0 0 0 0 0 0 0 0 0 0 0 0 2 0 0 0 0 0 0 0  
1 0 0 0 0 0 0 0 0 4 0 0 0 0 0 0 0 0 0 0 0 0 0 0 0 0 0 0 0  
0 0 0 0 0 0 0 0 0 0 0 0 0 0 0 0 0 0 0 0 0 0 0 0 0 0 0 0 0  
0 0 0 0 0 0 0 0 0 0 0 0 0 0 0 1 0 0 0 0 0 0 0 0 0 0 0 0 0  
M02255\_77\_000000000-ADUT3\_1\_1105\_7413\_12065 T---AC---GT-AG-GGT-----GCA-A-G-----C--G--T---T--GT-C-CGG-AA-----TT-A--T-T--GG-GC-----GT--A-----AA-GA-GC-TC-----G-TA-G-G-T-G-----G--T-TC-G-T-C-----GC--  
--G-T-C-T-----G-C-T--G--TG--A-AA-GT--C-C-GA-G-G-----CT-T-AA-----C-C-T-C-G-G-A--T-C---T-G--C-A---G--T-----G--GG-T-A--C-----G--G-G--CG-G-A-C---T-A-G-A-G-T--G--C-GG-----TA-G-A-----G-G-A-G--AT-G-----GG--A--ATT---C-C-T-G-  
GT--GT-A-G-CG-GT--G---G--A-A---TG-C-GC-AG--AT-A-TC--A-G--G-A-G-G-A-AC-A-CC---GG--T--G--GC-GAA-G--G-C--G-----C--A-T-C-T---CTG--G--GC-C-G-----T-A---A-C-T--GA--CG-C-T-G--A-GG--A-G-CG-A--AA-G-C---A-TG--GG-G--AG-  
C-G-AA-----CA--GG Bacteria(100);Actinobacteria(100);Actinobacteria(100);Actinobacteridae(100);Actinomycetales(100);unclassified(100);unclassified(100);unclassified(100);unclassified(100);

Otu1671 0 0 0 0 0 0 16 1 43 0 0 0 0 0 0 0 0 0 0 0 0 0 0 0 0 0 0 0 0  
0 0 0 0 0 0 0 0 0 0 0 0 0 0 0 0 0 0 0 0 0 0 0 0 0 0 0 0 0  
0 0 0 0 0 0 0 0 0 0 0 0 0 0 0 0 0 0 0 0 0 0 0 0 0 0 0 0 0  
0 0 0 6 0 0 1 0 0 0 0 0 0 0 0 0 0 0 0 0 0 0 0 0 3 54 0 0  
M02255\_77\_000000000-ADUT3\_1\_1109\_6560\_14917 T---AC---GT-AG-GTG-----ACA-A-G-----C--G--T---T--GT-C-CGG-AT-----TT-A--C-T--GG-GT-----GT--A-----AA-GG-GC-GC-----G-TA-G-G-C-G-----G--A--C-T-GTC-----AA-  
---G-T-C-A-----G-T-C--G--TG--A-AA-TA--C-C-GG-G-G-----CT-T-AA-----C-C-C-C-G-G-G--G-C---T-G--C-G---A--T-----T--GA-A-A--C-----T--G-A--CA--G-C-C---T-T-G-A-G-T--A--T-CG-----GA-G-A-----G-G-A-A--AG-C-----GG--A--ATT---C-C-T-A-  
GT--GT-A-G-CG-GT--G---A--A-A---TG-C-GT-AG--AT-A-TT--A-G--G-A-G-G-A-AC-A-CC---AG--T--G--GC-GAA-G--G-C--G-----G--C-T-T-T---CTG--G--AC-G-A-----C-A---A-C-T--GA--CG-C-T-G--A-GG--C-G-CG-A--AA-G-T---G-TG--GG-G--AG-  
C-A-AA-----CA--GG Bacteria(100);Firmicutes(100);Clostridia(100);Clostridiales(100);unclassified(100);unclassified(100);unclassified(100);unclassified(100);unclassified(100);

Otu1672 0 0 0 0 0 0 48 4 172 0 0 0 0 0 0 0 0 0 0 0 0 0 0 0 0 0 0 0 0  
0 0 0 0 0 0 0 0 0 0 0 0 0 0 0 0 0 0 0 0 0 0 0 0 0 0 0 0 0  
0 0 0 0 0 0 0 0 0 0 0 0 0 0 0 2 0 0 0 0 0 0 0 0 0 0 0 0 0  
0 0 0 0 0 0 0 0 0 0 0 0 0 0 0 0 0 0 0 0 0 0 0 2 28 0 0  
M02255\_77\_000000000-ADUT3\_1\_1109\_17302\_14845 T---AC---GT-AT-GGA-----GCA-A-G-----C--G--T---T--AT-C-CGG-AT-----TT-A--T-T--GG-GC-----GT--A-----AA-GC-GC-GC-----G-TA-G-G-C-G-----G--C-TT-G-T-T-----  
-----AA---G-C-A-A-----G-G-T--C--TT--A-AA-TC--T-T-GG-G-G-----CT-C-AA-----C-C-T-C-A-A-G--C-----C-G--G-A--T--C-----T--TG-A-A--C-----T--G-G--CA--G-G-C---T-C-G-A-G-T--A--T-GG-----TA-G-A-----G-G-A-A--AG-T-----GG--A--ATT---C-  
C-C-A-GT--GT-A-G-CG-GT--G---G--A-A---TG-C-GC-AG--AT-A-TT--G-G--G-A-G-A-G-A-AC-A-CC---GA--T--G--GC-GAA-G--G-C--A-----G--C-T-T-T---CTG--G--GC-C-A-----T-T---A-C-T--GA--CG-C-T-G--A-GG--T-G-CG-A--AA-G-C---T-AG--GG-G-  
-AG-C-A-AA-----CA--GG Bacteria(100);unclassified(100);unclassified(100);unclassified(100);unclassified(100);unclassified(100);unclassified(100);unclassified(100);unclassified(100);

Otu1673 0 0 0 0 178 0 0 0 0 0 0 0 0 0 0 0 0 0 0 0 0 0 0 0 0 0 0 0 0  
0 0 0 0 0 0 0 0 0 0 0 0 0 0 0 0 0 0 0 0 0 0 0 0 0 0 0 0 0  
0 0 0 0 0 0 0 0 0 0 0 0 0 0 0 0 0 0 0 0 0 0 0 0 0 0 0 0 0  
0 0 0 0 0 0 0 0 0 0 0 0 0 0 0 0 0 0 0 0 0 0 0 0 0 0 0 0 0  
M02255\_77\_000000000-ADUT3\_1\_1104\_18394\_10042 T---AC---GT-AG-GGA-----GCA-A-G-----C--G--T---T--GT-C-CGG-AA-----TT-A--C-T--GG-GT-----GT--A-----AA-GG-GA-GC-----G-TA-G-G-C-G-----G--G-AA-T-G-C---  
-----AA---G-T-T-G-----A-A-T--G--TC--A-AA-TC--T-A-CC-G-G-----CT-T-AA-----C-T-G-G-T-A-G---C---C-G--C-G---T--T-----C--AA-A-A--C-----T--G-C--GT--T-T-C---T-T-G-A-G-T--G---A-AG-----TA-G-A-----G-G-C-A---GG-C-----GG--A--ATT---C-  
C-T-A-GT--GT-A-G-CG-GT--G---A--A-A---TG-C-GT-AGA-T--A-TT--A-G--G-A-G-G-A-AC-A-CC---AG--T--G--GC-GAA-G--G-C--G-----G--C-C-T-G---CTG--G--GC-T-T-----T-T---A-C-T--GA--CG-C-T-G--A-GG--C-T-CG-A--AA-G-T---G-TG--GG-T--  
AG-C-A-AA-----CA--GG Bacteria(100);Firmicutes(100);Clostridia(100);Clostridiales(100);Ruminococcaceae(100);unclassified(100);unclassified(100);unclassified(100);unclassified(100);

Otu1674 0 0 0 35 0 0 0 0 0 0 0 0 0 0 0 0 0 0 0 0 0 0 0 0 0 0 0 0 0  
0 0 0 0 0 0 0 0 0 0 0 0 0 0 0 0 0 0 0 0 0 0 0 0 0 0 0 0 0  
0 0 0 0 0 0 0 0 0 0 0 0 0 0 0 0 0 0 0 0 0 0 0 0 0 0 0 0 0  
0 0 0 0 0 0 0 0 0 0 0 0 0 0 0 0 0 0 0 0 0 0 0 0 0 0 0 0 0  
M02255\_77\_000000000-ADUT3\_1\_1111\_10326\_9035 T---AC---GA-AG-GGG-----GCT-A-G-----C--G--T---T--GC-T-CGG-AA-----TG-A--C-T--GG-GC-----GT--A-----AA-GG-GC-GC-----G-TA-G-G-C-G-----G--A-TG-T-C-T-----  
TT---G-T-C-G-----G-G-C--G--TG--A-AA-TT--C-C-AG-G-G-----CT-C-AA-----C-C-T-T-G-G-G--A-C---T-G--C-G---T--T-----C--GA-G-A--C-----G--G-G--AT--G-T-C---T-A-G-A-G-T--T---T-GG-----CA-G-A-----G-G-G-T---CG-T-----GG--A--ATT---C-C-C-  
A-GT--GT-A-G-AG-GT--G---A--A-A---TT-C-GT-AG--AT-A-TT--G-G--G-A-G-A-G-A-AC-A-CC---GG--T--G--GC-GAA-G--G-C--G-----G--C-G-A-C---CTG--G--TC-C-T-----T-G---A-C-T--GA--CG-C-T-G--A-TG--C-G-CG-A--AA-G-C---G-TG--GG-G--  
AG-C-A-AA-----CA--GG Bacteria(100);Proteobacteria(100);Alphaproteobacteria(100);Rhodospirillales(100);unclassified(100);unclassified(100);unclassified(100);unclassified(100);unclassified(100);



Otu1675 0 0 0 76 0 0 0 0 0 0 0 0 0 0 0 0 0 0 0 0 0 0 0 0 0 0 0 0 0 0  
0 0 0 0 0 0 0 0 0 0 0 0 0 0 0 0 0 0 0 0 0 0 0 0 0 0 0 0 0 0  
0 0 0 0 0 0 0 0 0 0 0 0 0 0 0 0 0 0 0 0 0 0 0 0 0 0 0 0 0 0  
0 0 0 0 0 0 0 0 0 0 0 0 0 0 0 0 0 0 0 0 0 0 0 0 0 0 0 0 0 0  
M02255\_77\_000000000-ADUT3\_1\_1111\_11517\_5654 G---AC---GG-AG-GGT-----GCT-A-G-----C--G--T---T-GT-T-CGG-AA-----TT-A--C-T--GG-GC-----GT--A----AA-GG-GC-GC-----G-TA-G-G-C-G-----G--C-TC-T-T-G-----  
AA---G-T-C-G-----G-A-T--G-TG--A-AA-GC--C-C-GG-G-G-----CT-C-AA-----C-C-T-C-G-G-A--A-C---G-G--C-A---T-C-----C--GA-T-A--C-----T--C-T--TG--G-G-C---T-T-G-A-G-A--C---C-GG-----AA-G-A-----G-G-T-G---AG-T-----GG--A--ATA---C-C-  
C-A-GT--GT-A-G-AG-GT--G---A--A-A---TT-C-GT-AG--AT-A-TT--G-G--G-T-G-G-A-AC-A-CC---GG--T--G--GC-GAA-A--G-C--G-----G--C-T-C-A---CTG--G--TC-C-G-----G-T---T-C-T--GA--CG-C-T-G--A-GG--C-G-CG-A--AA-G-C---G-T-G-GG-G--  
AG-C-A-AA-----CA--GG Bacteria(100);Proteobacteria(100);Alphaproteobacteria(100);unclassified(100);unclassified(100);unclassified(100);unclassified(100);unclassified(100);unclassified(100);

Otu1676 0 0 0 0 168 0 0 0 0 0 0 0 0 0 0 0 0 0 0 0 0 0 0 0 0 0 0 0 0 0 0  
0 0 0 0 0 0 0 0 0 0 0 0 0 0 0 0 0 0 0 0 0 0 0 0 0 0 0 0 0 0  
0 0 0 0 0 0 0 0 0 0 0 0 0 0 0 0 0 0 0 0 0 0 0 0 0 0 0 0 0 0  
0 0 0 0 0 0 0 0 0 0 0 0 0 0 0 0 0 0 0 0 0 0 0 0 0 0 0 0 0 0  
M02255\_77\_000000000-ADUT3\_1\_1104\_21820\_11000 T---AC--AG-AG-GCC-----CCG-A-G-----C--G--T---T-AG-T-CGG-AA-----TC-A--C-T--GG-GC-----TT--A----AA-GG-GT-GC-----G-TA-G-G-C-G-----G--A-CT-T-G-T-----  
-----AA---G-T-G-C-----T-T-T--G-TG--A-AA-GC--C-C-CG-G-G-----CT-C-AA-----C-C-C-G-G-G-A--A-C---C-G--C-A---G-G-----G--CA-T-A--C-----T--G-C--AA-G-T-C---T-T-G-A-G-G-A--A-GC-----TA-G-A-----G-G-C-G---GG-T-----AG--A--ACG---  
A-T-C-G-GT--GG-A-G-CG-GT--G---G--A-A---TG-C-GT-AG--AG-A-TC--G-A--T-C-G-G-A-AT-G-CC---AA--G--G--GT-GAA-G--A-C-A-----A--C-C-C-G---CTG--G--GG-C-T-----T-T---C-C-T--GA--CG-C-T-G--A-GG--C-A-CG-A--AA-G-C---G-TG--  
GG-G--AT-C-A-AA-----CA--GG Bacteria(100);unclassified(100);unclassified(100);unclassified(100);unclassified(100);unclassified(100);unclassified(100);unclassified(100);unclassified(100);

Otu1677 0 0 0 0 0 0 0 0 0 48 0 0 0 0 0 0 0 0 0 0 0 0 0 0 0 0 0 0 0 0  
0 0 0 0 0 0 0 0 0 0 0 0 0 0 0 0 0 0 0 0 0 0 0 0 0 0 0 0 0 0  
0 0 0 0 0 0 0 0 0 0 0 0 0 0 0 0 0 0 0 0 0 0 0 0 0 0 0 0 0 0  
0 0 0 0 0 0 0 0 0 0 0 0 0 0 0 0 0 0 0 0 0 0 0 0 0 0 0 0 0 0  
M02255\_77\_000000000-ADUT3\_1\_1111\_4413\_8206 T---AC--GT-AG-GTG-----GCA-A-G-----C--G--T---T-AT-C-CGG-AT-----TT-A--C-T--GG-GT-----GT--A----AA-GG-GC-GT-----G-TA-G-G-C-G-----G--G-AA-G-G-C-----  
AA---G-T-C-A-----G-A-T--G-TG--A-AA-AC--T-A-TG-G-G-----CT-C-AA-----C-C-C-A-T-A-G--C-C---T-G--C-A---T-T-----T--GA-A-A--C-----T--G-T--TT--T-T-C---T-T-G-A-G-T-G---C-TG-----GA-G-A-----G-G-C-A---AT-C-----GG--A--ATT---C-C-G-T-  
GT--GT-A-G-CG-GT--G---A--A-A---TG-C-GT-AG--AT-A-TA--C-G--G-A-G-G-A-AC-A-CC---AG--T--G--GC-GAA-G--G-C--G-----G--A-T-T-G---CTG--G--AC-A-G-----T-A---A-C-T--GA--CG-C-T-G--A-GG--C-G-CG-A--AA-G-C---G-TG--GG-G--AG-  
C-A-AA-----CA--GG Bacteria(100);Firmicutes(100);Clostridia(100);Clostridiales(100);Ruminococcaceae(100);Incertae\_Sedis(100);unclassified(100);unclassified(100);unclassified(100);

Otu1678 0 0 0 0 0 0 0 0 0 0 0 0 0 0 7 0 0 0 0 0 0 0 0 0 0 0 0 0 0 0  
0 0 0 0 0 0 0 0 0 0 0 0 0 0 0 0 0 0 0 0 0 0 0 0 0 0 0 0 0 0  
0 0 0 0 0 0 0 0 0 0 0 0 0 0 0 0 0 0 0 0 0 0 0 0 0 0 0 0 0 0  
0 0 0 0 0 0 0 0 0 0 0 0 0 0 0 0 0 0 0 0 0 0 0 0 0 0 0 0 0 0  
M02255\_77\_000000000-ADUT3\_1\_2119\_26179\_21370 T---AC--GG-AG-GGG-----GCT-A-G-----C--G--T---T-GT-T-CGG-AA-----AT-A--C-T--GG-GC-----GT--A----AA-GC-GT-AC-----G-TA-G-G-C-G-----G--C-AT-G-G-C---  
-----AA---G-T-C-A-----G-G-G--G-TG--A-AA-TC--C-C-GG-A-G-----CT-C-AA-----C-T-C-C-G-G-A--A-C---T-G--C-C---C--T-----T--GA-A-A--C-----T--G-C--TT--C-G-C---T-A-G-A-A-T--C---T-TG-----GA-G-A-----G-G-T-C---AG-T-----GG--A--ATT---C-  
C-G-A-GT--GT-A-G-AG-GT--G---A--A-A---TT-C-GT-AG--AT-A-TT--C-G--G-A-G-A-AC-A-CC---AG--T--G--GC-GAA-G--G-C--G-----A--C-T-G-A---CTG--G--AC-A-A-----G-T---A-T-T--GA--CG-C-T-G--A-GG--T-A-CG-A--AA-G-C---G-TG--GG-  
G--AG-C-A-AA-----CA--GG Bacteria(100);Proteobacteria(100);Alphaproteobacteria(100);Sphingomonadales(100);unclassified(100);unclassified(100);unclassified(100);unclassified(100);unclassified(100);

Otu1679 0 0 0 76 0 0 0 0 0 0 0 0 0 0 0 0 0 0 0 0 0 0 0 0 0 0 0 0 0 0  
0 0 0 0 0 0 0 0 0 0 0 0 0 0 0 0 0 0 0 0 0 0 0 0 0 0 0 0 0 0  
0 0 0 0 0 0 0 0 0 0 0 0 0 0 0 0 0 0 0 0 0 0 0 0 0 0 0 0 0 0  
0 0 0 0 0 0 0 0 0 0 0 0 0 0 0 0 0 0 0 0 0 0 0 0 0 0 0 0 0 0  
M02255\_77\_000000000-ADUT3\_1\_1108\_7341\_18101 T---AC--GA-AG-GGG-----GCT-A-G-----C--G--T---T-GT-T-CGG-AA-----TT-A--C-T--GG-GC-----GT--A----AA-GC-GC-AC-----G-TA-G-G-C-G-----G--A-TA-T-T-T-----AA-  
---G-T-C-G-----G-G-G--G-TG--A-AA-TC--C-C-GG-G-G-----CT-C-AA-----C-C-C-C-G-G-A--A-C---G-G--C-C---T-T-----C--GA-T-A--C-----T--G-G--GT--A-T-C---T-T-G-A-G-T-C---C-GG-----AA-G-A-----G-G-T-G---AG-T-----GG--A--ATT---G-C-G-A-  
GT--GT-A-G-AG-GT--G---A--A-A---TT-C-GT-AG--AT-A-TT--C-G--C-A-G-G-A-AC-A-CC---AG--T--G--GC-GAA-G--G-C--G-----G--C-T-C-A---CTG--G--TC-C-G-----G-A---A-C-T--GA--CG-C-T-G--A-GG--T-G-CG-A--AA-G-C---G-TG--GG-G--AG-  
C-A-AA-----CA--GG Bacteria(100);Proteobacteria(100);Alphaproteobacteria(100);unclassified(100);unclassified(100);unclassified(100);unclassified(100);unclassified(100);unclassified(100);



|                                              |                                                                                                                                                     |                                                                                                                                                                                                                 |                                                                                                                                                                                                        |                            |                                                                                                                                                                |   |    |    |    |   |   |   |   |   |   |   |   |   |   |   |   |   |   |   |   |   |
|----------------------------------------------|-----------------------------------------------------------------------------------------------------------------------------------------------------|-----------------------------------------------------------------------------------------------------------------------------------------------------------------------------------------------------------------|--------------------------------------------------------------------------------------------------------------------------------------------------------------------------------------------------------|----------------------------|----------------------------------------------------------------------------------------------------------------------------------------------------------------|---|----|----|----|---|---|---|---|---|---|---|---|---|---|---|---|---|---|---|---|---|
| Otu1680                                      | 0                                                                                                                                                   | 0                                                                                                                                                                                                               | 0                                                                                                                                                                                                      | 0                          | 0                                                                                                                                                              | 0 | 24 | 3  | 58 | 0 | 0 | 0 | 0 | 0 | 0 | 0 | 0 | 0 | 0 | 0 | 0 | 0 | 0 | 0 | 0 | 0 |
|                                              | 0                                                                                                                                                   | 0                                                                                                                                                                                                               | 0                                                                                                                                                                                                      | 0                          | 0                                                                                                                                                              | 0 | 0  | 0  | 0  | 0 | 0 | 0 | 0 | 0 | 0 | 0 | 0 | 0 | 0 | 0 | 0 | 0 | 0 | 0 | 0 | 0 |
|                                              | 0                                                                                                                                                   | 0                                                                                                                                                                                                               | 0                                                                                                                                                                                                      | 0                          | 0                                                                                                                                                              | 0 | 0  | 0  | 0  | 0 | 0 | 0 | 0 | 0 | 0 | 0 | 0 | 0 | 0 | 0 | 0 | 0 | 0 | 0 | 0 | 0 |
|                                              | 0                                                                                                                                                   | 0                                                                                                                                                                                                               | 0                                                                                                                                                                                                      | 0                          | 0                                                                                                                                                              | 0 | 0  | 0  | 0  | 0 | 0 | 0 | 0 | 0 | 0 | 0 | 0 | 0 | 0 | 0 | 0 | 0 | 0 | 0 | 0 | 0 |
| M02255_77_000000000-ADUT3_1_1107_4089_13402  | T---AC---GT-AG-GGG-----GCA-A-G-----C-G-T--T--AT-C-CGG-AT-----TT-A-C-T-GG-GT-----GT-A----AA-GG-GA-GC-----G-CA-G-G-C-G-----G-C-AT-G-A-T-----          | AA---G-T-C-T-----G-A-T--G--TG--A-AA-AC--C-C-AA-G-G----CT-C-AA-----C-C-A-T-G-G-G--A-C---T-G-C-A--T-T-----G--GA-A-A--C-----T-G-T-CG-T-G-C---T-G-G-A-G-T-G--T-CG---GA-G-A-----G-G-T-A--AG-C-----GG-A-ATT---C-C-T-  | A-GT--GT-A-G-CG-GT--G---A-A-A---TG-C-GT-AG--AT-A-TT--A-G--G-A-G-G-A-AC-A-CC--AG-T-G-GC-GAA-G-G-C-G-----G-C-T-T-A--CTG--G--AC-G-A-----T-G--A-C-T-GA--CG-C-T-G--A-GG--C-T-CG-A-AA-G-C--G-TG--GG-G--      | AG-C-A-AA-----CA--GG       | Bacteria(100);Firmicutes(100);Clostridia(100);Clostridiales(100);Lachnospiraceae(100);unclassified(100);unclassified(100);unclassified(100);unclassified(100); |   |    |    |    |   |   |   |   |   |   |   |   |   |   |   |   |   |   |   |   |   |
| Otu1681                                      | 0                                                                                                                                                   | 0                                                                                                                                                                                                               | 0                                                                                                                                                                                                      | 0                          | 147                                                                                                                                                            | 0 | 0  | 0  | 0  | 0 | 0 | 0 | 0 | 0 | 0 | 0 | 0 | 0 | 0 | 0 | 0 | 0 | 0 | 0 | 0 | 0 |
|                                              | 0                                                                                                                                                   | 0                                                                                                                                                                                                               | 0                                                                                                                                                                                                      | 0                          | 0                                                                                                                                                              | 0 | 0  | 0  | 0  | 0 | 0 | 0 | 0 | 0 | 0 | 0 | 0 | 0 | 0 | 0 | 0 | 0 | 0 | 0 | 0 | 0 |
|                                              | 0                                                                                                                                                   | 0                                                                                                                                                                                                               | 0                                                                                                                                                                                                      | 0                          | 0                                                                                                                                                              | 0 | 0  | 0  | 0  | 0 | 0 | 0 | 0 | 0 | 0 | 0 | 0 | 0 | 0 | 0 | 0 | 0 | 0 | 0 | 0 | 0 |
|                                              | 0                                                                                                                                                   | 0                                                                                                                                                                                                               | 0                                                                                                                                                                                                      | 0                          | 0                                                                                                                                                              | 0 | 0  | 0  | 0  | 0 | 0 | 0 | 0 | 0 | 0 | 0 | 0 | 0 | 0 | 0 | 0 | 0 | 0 | 0 | 0 | 0 |
| M02255_77_000000000-ADUT3_1_1105_17526_14122 | T---AC---GA-AG-GGT-----GCT-A-G-----C-G--T--T--GT-T-CGG-AA-----TC-A--C-T-GG-GC-----GT--A----AA-GC-GC-GC-----G-TA-G-G-C-G-----G--C-TT-G-T-C-----      | AA---G-T-C-A-----G-G-G--G--TG--A-AA-TC--C-T-GA-G-G----CT-C-AA-----C-C-T-C-A-G-A--A-T---T-G--C-C--T-T-----T-GA-A-A--C-----T-A-G-CA--G-G-C---T-G-G-A-G-T-G--T-CG---GA-G-G-----G-G-A-T--AG-C-----GG--A-ATT---      | C-C-T-A-AT--GT-A-G-AG-GT--G---A-A-A---TT-C-GT-AG--AT-A-TT--A-G--G-A-G-G-A-AC-A-CC--GG-T-G-GC-GAA-G-G-C-G-----G-C-T-A-T--CTG--G--AC-G-A-----C-A--A-C-T-GA--CG-C-T-G--A-GG--C-G-CG-A-AA-G-C--G-TG--      | GG-G--AT-C-A-AA-----CA--GG | Bacteria(100);unclassified(100);unclassified(100);unclassified(100);unclassified(100);unclassified(100);unclassified(100);unclassified(100);unclassified(100); |   |    |    |    |   |   |   |   |   |   |   |   |   |   |   |   |   |   |   |   |   |
| Otu1682                                      | 0                                                                                                                                                   | 0                                                                                                                                                                                                               | 0                                                                                                                                                                                                      | 0                          | 0                                                                                                                                                              | 0 | 0  | 24 | 0  | 0 | 0 | 0 | 0 | 0 | 0 | 0 | 0 | 0 | 0 | 0 | 0 | 0 | 0 | 0 | 0 | 0 |
|                                              | 0                                                                                                                                                   | 0                                                                                                                                                                                                               | 0                                                                                                                                                                                                      | 0                          | 0                                                                                                                                                              | 0 | 0  | 0  | 0  | 0 | 0 | 0 | 0 | 0 | 0 | 0 | 0 | 0 | 0 | 0 | 0 | 0 | 0 | 0 | 0 | 0 |
|                                              | 0                                                                                                                                                   | 0                                                                                                                                                                                                               | 0                                                                                                                                                                                                      | 0                          | 0                                                                                                                                                              | 0 | 0  | 0  | 0  | 0 | 0 | 0 | 0 | 0 | 0 | 0 | 0 | 0 | 0 | 0 | 0 | 0 | 0 | 0 | 0 | 0 |
|                                              | 0                                                                                                                                                   | 0                                                                                                                                                                                                               | 0                                                                                                                                                                                                      | 0                          | 0                                                                                                                                                              | 0 | 0  | 0  | 0  | 0 | 0 | 0 | 0 | 0 | 0 | 0 | 0 | 0 | 0 | 0 | 0 | 0 | 0 | 0 | 0 | 0 |
| M02255_77_000000000-ADUT3_1_2114_28763_14140 | G---AC---AG-AG-GTG-----CCA-A-G-----C--G--T--T--AG-G-CGG-AA-----TC-A--C-T-GG-GC-----TT--A----AA-GC-GT-GT-----G-TA-G-G-C-G-----G--A-TC-G-T-T-----     | AA---G-T-A-C-----C-T-T--G--TG--A-AA-TC--C-C-AC-G-G----CT-C-AA-----C-C-G-T-G-G-A--A-C---T-G--C-T--C--G-----G--TA-T-A--C-----T-G-G-CG--G-T-C---T-T-G-A-G-C--C--A-CC---TA-G-G-----G-G-C-A--GC-T-----GG--A-ACA---A- | G-C-G-GT--GG-A-G-CG-GT--G---A-A-A---TG-C-GT-AG--AT-A-TC--G-C--T-T-G-G-A-AC-G-CC--AA--C-G--GT-GAA-A--A-C-A-----G--G-C-T-G--CTG--G--GG-G-T-----G-T--G-C-T-GA--CG-C-T-G--A-GA--C-A-CG-A-AA-G-C--C-AG--GG- | G--AG-C-G-AA-----CG--GG    | Bacteria(100);Planctomycetes(100);Phycisphaerae(100);WD2101(100);unclassified(100);unclassified(100);unclassified(100);unclassified(100);unclassified(100);    |   |    |    |    |   |   |   |   |   |   |   |   |   |   |   |   |   |   |   |   |   |
| Otu1683                                      | 1                                                                                                                                                   | 1                                                                                                                                                                                                               | 0                                                                                                                                                                                                      | 0                          | 0                                                                                                                                                              | 0 | 0  | 0  | 0  | 0 | 0 | 0 | 0 | 0 | 0 | 0 | 0 | 0 | 0 | 0 | 0 | 0 | 0 | 0 | 0 | 0 |
|                                              | 0                                                                                                                                                   | 0                                                                                                                                                                                                               | 0                                                                                                                                                                                                      | 0                          | 0                                                                                                                                                              | 1 | 0  | 0  | 0  | 0 | 0 | 0 | 0 | 0 | 2 | 0 | 0 | 0 | 1 | 0 | 0 | 0 | 0 | 0 | 0 | 0 |
|                                              | 0                                                                                                                                                   | 0                                                                                                                                                                                                               | 0                                                                                                                                                                                                      | 0                          | 0                                                                                                                                                              | 0 | 0  | 0  | 0  | 0 | 0 | 0 | 0 | 0 | 0 | 0 | 0 | 0 | 0 | 0 | 0 | 0 | 0 | 0 | 1 | 0 |
|                                              | 0                                                                                                                                                   | 0                                                                                                                                                                                                               | 0                                                                                                                                                                                                      | 0                          | 0                                                                                                                                                              | 4 | 0  | 0  | 0  | 0 | 0 | 0 | 0 | 0 | 0 | 0 | 0 | 1 | 0 | 0 | 0 | 0 | 0 | 0 | 0 | 0 |
| M02255_76_000000000-ADUNE_1_1108_26976_5194  | T---AC---GT-AG-GTC-----CCG-A-G-----C--G--T--T--GT-C-CGG-AT-----TT-A--T-T-GG-GC-----GT--A----AA-GC-GA-GC-----G-CA-G-G-C-G-----G--T-TT-G-A-T-----AA-- | --G-T-C-T-----G-A-A--G--TT--A-AA-GG--C-T-GT-G-G----CT-C-AA-----C-C-A-T-A-G-T-T-----C-G--C-T--T-T-----G--GA-A-A                                                                                                  |                                                                                                                                                                                                        |                            |                                                                                                                                                                |   |    |    |    |   |   |   |   |   |   |   |   |   |   |   |   |   |   |   |   |   |



|                                                                                                                                                                                                                                                                                                                                                                                                                                                                                                                                                                                                                                                                                                                                                                                                                                                  |    |   |    |    |    |    |    |     |    |   |    |   |   |   |    |   |   |    |   |   |   |   |    |   |   |    |   |
|--------------------------------------------------------------------------------------------------------------------------------------------------------------------------------------------------------------------------------------------------------------------------------------------------------------------------------------------------------------------------------------------------------------------------------------------------------------------------------------------------------------------------------------------------------------------------------------------------------------------------------------------------------------------------------------------------------------------------------------------------------------------------------------------------------------------------------------------------|----|---|----|----|----|----|----|-----|----|---|----|---|---|---|----|---|---|----|---|---|---|---|----|---|---|----|---|
| Otu1685                                                                                                                                                                                                                                                                                                                                                                                                                                                                                                                                                                                                                                                                                                                                                                                                                                          | 0  | 0 | 0  | 38 | 0  | 0  | 0  | 0   | 0  | 0 | 0  | 0 | 0 | 0 | 0  | 0 | 0 | 0  | 0 | 0 | 0 | 0 | 0  | 0 | 0 | 0  | 0 |
|                                                                                                                                                                                                                                                                                                                                                                                                                                                                                                                                                                                                                                                                                                                                                                                                                                                  | 0  | 0 | 0  | 0  | 0  | 0  | 0  | 0   | 0  | 0 | 0  | 0 | 0 | 0 | 0  | 0 | 0 | 0  | 0 | 0 | 0 | 0 | 0  | 0 | 0 | 0  |   |
|                                                                                                                                                                                                                                                                                                                                                                                                                                                                                                                                                                                                                                                                                                                                                                                                                                                  | 0  | 0 | 0  | 0  | 0  | 0  | 0  | 0   | 0  | 0 | 0  | 0 | 0 | 0 | 0  | 0 | 0 | 0  | 0 | 0 | 0 | 0 | 0  | 0 | 0 | 0  |   |
|                                                                                                                                                                                                                                                                                                                                                                                                                                                                                                                                                                                                                                                                                                                                                                                                                                                  | 0  | 0 | 0  | 0  | 0  | 0  | 0  | 0   | 0  | 0 | 0  | 0 | 0 | 0 | 0  | 0 | 0 | 0  | 0 | 0 | 0 | 0 | 0  | 0 | 0 |    |   |
| M02255_77_000000000-ADUT3_1_1108_10222_4794 T---AC---GT-AG-GGG-----GCG-A-G-----C--G--T---T-AT-C-CGG-AA-----TT-A--T-T--GG-GC-----GT--A----AA-GA-GT-GC-----G-TA-G-G-T-G-----G--T-TA-C-C-T-----AA-<br>---G-C-A-G-----G-G-G--G--TT--T-AA-GG--C-T-AT-G-G----CT-T-AA-----C-C-A-T-A-G-T--T-----C-G--C-C--C--C-----C-TG-A-A--C-----T-G-G--GC--T-A-C---T-T-G-A-G-T-G---C-AG----GA-G-A-----G-G-A-A--AG-C-----GG--A--ATT---C-C-T-A-<br>GT--GT-A-G-CG-GT--G---A--A-A---TG-C-GT-AG--AT-A-TT--A-G--G-A-G-G-A-AC-A-CC---AG--T--G--GC-GAA-G--G-C-G-----G--C-T-T-T---CTG--G--AC-T-G-----T-A---A-C-T--GA--CA-C-T-G--A-GG--C-A-CG-A-AA-G-C---G-TG--GG-G--AG-<br>C-A-AA-----CA--GG Bacteria(100);Firmicutes(100);Clostridia(100);Clostridiales(100);unclassified(100);unclassified(100);unclassified(100);unclassified(100);unclassified(100);                       |    |   |    |    |    |    |    |     |    |   |    |   |   |   |    |   |   |    |   |   |   |   |    |   |   |    |   |
| Otu1686                                                                                                                                                                                                                                                                                                                                                                                                                                                                                                                                                                                                                                                                                                                                                                                                                                          | 0  | 0 | 0  | 0  | 18 | 0  | 0  | 46  | 0  | 0 | 0  | 0 | 0 | 0 | 0  | 0 | 0 | 0  | 0 | 0 | 0 | 0 | 0  | 0 | 0 | 0  |   |
|                                                                                                                                                                                                                                                                                                                                                                                                                                                                                                                                                                                                                                                                                                                                                                                                                                                  | 0  | 0 | 42 | 0  | 0  | 0  | 0  | 0   | 0  | 0 | 0  | 0 | 0 | 0 | 0  | 0 | 0 | 0  | 0 | 0 | 0 | 5 | 0  | 0 | 0 | 0  |   |
|                                                                                                                                                                                                                                                                                                                                                                                                                                                                                                                                                                                                                                                                                                                                                                                                                                                  | 0  | 0 | 0  | 0  | 0  | 0  | 0  | 0   | 0  | 7 | 0  | 0 | 0 | 0 | 0  | 0 | 0 | 0  | 0 | 0 | 0 | 0 | 0  | 0 | 0 | 0  |   |
|                                                                                                                                                                                                                                                                                                                                                                                                                                                                                                                                                                                                                                                                                                                                                                                                                                                  | 18 | 0 | 0  | 0  | 0  | 0  | 0  | 0   | 30 | 0 | 0  | 0 | 0 | 0 | 0  | 0 | 0 | 0  | 0 | 0 | 0 | 0 | 11 | 0 | 0 |    |   |
| M02255_77_000000000-ADUT3_1_1117_25190_8008 T---AC---GA-AG-GGG-----GCG-A-G-----C--G--T---T-GT-T-CGG-AA-----TC-A--C-T--GG-GC-----TT--A----AA-GC-GT-GC-----G-TA-G-G-T-G-----G--G-CA-G-G-A-----<br>TA---G-T-C-A-----G-A-A--G--TG--A-AA-TC--C-C-GG-G-G----CT-T-AA-----C-C-C-C-G-G-A--A-C---T-G--C-T---T--T-----T-GA-A-A--C-----T--T-C-CT-G-T-C---T-G-G-A-A-T--T---C-GG----TA-G-A-----G-G-C-T--GA-T-----GG--A--ATA---C-C-C-<br>A-GT--GT-A-G-AG-GT--G---A--A-A---TT-C-GC-AG--AT-A-TT--G-G--G-T-G-G-A-AC-A-CC---AG--T--G--GC-GAA-G--G-C-G-----A--T-C-A-G---CTG--G--GC-C-G-----A-T---A-T-T--GA--CA-C-T-G--A-GG--C-A-CG-A-AA-G-C---G-TG--GG-T--<br>AG-C-A-AA-----CA--GG Bacteria(100);Proteobacteria(100);Alphaproteobacteria(100);unclassified(100);unclassified(100);unclassified(100);unclassified(100);unclassified(100);unclassified(100);           |    |   |    |    |    |    |    |     |    |   |    |   |   |   |    |   |   |    |   |   |   |   |    |   |   |    |   |
| Otu1687                                                                                                                                                                                                                                                                                                                                                                                                                                                                                                                                                                                                                                                                                                                                                                                                                                          | 0  | 0 | 0  | 0  | 0  | 0  | 77 | 7   | 0  | 0 | 0  | 0 | 0 | 0 | 0  | 0 | 0 | 2  | 0 | 0 | 0 | 0 | 0  | 0 | 0 | 0  |   |
|                                                                                                                                                                                                                                                                                                                                                                                                                                                                                                                                                                                                                                                                                                                                                                                                                                                  | 0  | 0 | 0  | 0  | 0  | 47 | 0  | 126 | 0  | 0 | 0  | 0 | 0 | 0 | 0  | 0 | 0 | 0  | 0 | 0 | 0 | 0 | 0  | 0 | 0 | 0  |   |
|                                                                                                                                                                                                                                                                                                                                                                                                                                                                                                                                                                                                                                                                                                                                                                                                                                                  | 0  | 0 | 0  | 0  | 0  | 0  | 0  | 0   | 0  | 0 | 0  | 0 | 0 | 0 | 0  | 0 | 0 | 0  | 0 | 0 | 0 | 0 | 44 | 0 | 0 | 40 |   |
|                                                                                                                                                                                                                                                                                                                                                                                                                                                                                                                                                                                                                                                                                                                                                                                                                                                  | 0  | 0 | 0  | 0  | 0  | 4  | 7  | 0   | 0  | 0 | 35 | 0 | 0 | 0 | 0  | 0 | 0 | 36 | 0 | 0 | 0 | 1 | 0  | 0 | 6 |    |   |
| M02255_77_000000000-ADUT3_1_1104_1957_14465 T---AC---GG-AG-GGG-----GCA-A-G-----C--G--T---T-AT-C-CGG-AA-----TT-A--T-T--GG-GC-----GT--A----AA-GG-GT-AC-----G-TA-G-G-T-G-----G--C-CT-T-T-T-----AA-<br>---G-C-G-T-----A-G-G--G--TA--T-AA-GG--C-A-AT-G-G----CT-C-AA-----C-C-A-T-T-G-T--T-----C-G--C-C--C--T-----A-TG-A-A--C-----T--G-G--AA--G-G-C---T-T-G-A-G-T-G---C-AG----GA-G-A-----G-G-A-A--AG-C-----GG--A--ATT---C-C-T-A-<br>GT--GT-A-G-CG-GT--G---G--A-A---TG-C-AT-AG--AT-A-TT--A-G--G-A-G-G-A-AC-A-TC---AG--C--G--GC-GAA-G--G-C-G-----G--C-T-T-T---CTG--G--AC-T-G-----C-A---A-C-T--GA--CA-C-T-G--A-GG--T-A-CG-A-AA-G-C---G-TG--GG-G--AG-<br>C-A-AA-----CA--GG Bacteria(100);Firmicutes(100);Clostridia(100);Clostridiales(100);Family_XIII_Incertae_Sedis(100);Eubacterium(100);unclassified(100);unclassified(100);unclassified(100);         |    |   |    |    |    |    |    |     |    |   |    |   |   |   |    |   |   |    |   |   |   |   |    |   |   |    |   |
| Otu1688                                                                                                                                                                                                                                                                                                                                                                                                                                                                                                                                                                                                                                                                                                                                                                                                                                          | 0  | 0 | 0  | 0  | 0  | 0  | 0  | 0   | 0  | 0 | 2  | 0 | 0 | 0 | 0  | 0 | 0 | 0  | 0 | 0 | 0 | 0 | 0  | 0 | 0 | 0  |   |
|                                                                                                                                                                                                                                                                                                                                                                                                                                                                                                                                                                                                                                                                                                                                                                                                                                                  | 1  | 0 | 0  | 0  | 0  | 0  | 0  | 0   | 0  | 0 | 0  | 0 | 0 | 0 | 0  | 0 | 0 | 0  | 0 | 0 | 0 | 0 | 0  | 0 | 0 | 0  |   |
|                                                                                                                                                                                                                                                                                                                                                                                                                                                                                                                                                                                                                                                                                                                                                                                                                                                  | 0  | 0 | 0  | 0  | 0  | 0  | 0  | 0   | 0  | 0 | 0  | 0 | 0 | 0 | 0  | 0 | 0 | 0  | 0 | 1 | 0 | 0 | 0  | 0 | 0 | 0  |   |
|                                                                                                                                                                                                                                                                                                                                                                                                                                                                                                                                                                                                                                                                                                                                                                                                                                                  | 0  | 0 | 0  | 0  | 0  | 0  | 0  | 0   | 0  | 0 | 0  | 0 | 0 | 0 | 0  | 0 | 0 | 0  | 0 | 0 | 0 | 0 | 0  | 0 | 0 |    |   |
| M02255_77_000000000-ADUT3_1_2108_22471_16737 C---TG---TG-CC-AGC-----AGC-C-G-----C--G--G---T-AA-TACAG-AG-----GG-T--G-C-AA-GC-----GT--T----AA-TC-GG-AA-----T-TA-G-G-T-G-----G--C-TT-G-A-T-----<br>-----AA---G-T-C-A-----G-A-T--G--TG--A-AA-TC--C-C-CG-G-G----CT-T-AA-----C-C-T-G-G-G-A--A-C---T-G--C-A--T--C-----T--GA-T-A--C-----T--G-T--TA--G-G-C---T-A-G-A-A-T-A--G-GT----GA-G-A-----G-G-A-A--GG-T-----AG--A--ATT---C-<br>C-A-G-GT--GT-A-G-CG-GT--G---A--A-A---TG-C-GT-AG--AG-A-TC--T-G--G-A-G-G-A-AT-A-CC---GA--T--G--GC-GAA-G--G-C-A-----G--C-C-T-T---CTG--G--CA-T-C-----A-T---A-T-T--GA--CA-C-T-G--A-GG--T-T-CG-A-AA-G-C---G-TG--GG-T--<br>AG-C-A-AA-----CA--GG Bacteria(100);Proteobacteria(100);Gammaproteobacteria(100);Pseudomonadales(100);Moraxellaceae(100);Psychrobacter(100);unclassified(100);unclassified(100);unclassified(100); |    |   |    |    |    |    |    |     |    |   |    |   |   |   |    |   |   |    |   |   |   |   |    |   |   |    |   |
| Otu1689                                                                                                                                                                                                                                                                                                                                                                                                                                                                                                                                                                                                                                                                                                                                                                                                                                          | 0  | 0 | 0  | 0  | 0  | 0  | 57 | 180 | 0  | 0 | 0  | 0 | 0 | 0 | 0  | 0 | 0 | 0  | 0 | 0 | 0 | 0 | 0  | 0 | 0 | 0  |   |
|                                                                                                                                                                                                                                                                                                                                                                                                                                                                                                                                                                                                                                                                                                                                                                                                                                                  | 0  | 0 | 0  | 0  | 0  | 0  | 0  | 0   | 0  | 0 | 0  | 0 | 0 | 0 | 66 | 0 | 0 | 0  | 0 | 0 | 0 | 0 | 0  | 0 | 0 | 0  |   |
|                                                                                                                                                                                                                                                                                                                                                                                                                                                                                                                                                                                                                                                                                                                                                                                                                                                  | 0  | 0 | 0  | 0  | 0  | 0  | 0  | 4   | 0  | 0 | 0  | 0 | 0 | 0 | 0  | 0 | 0 | 0  | 0 | 0 | 0 | 0 | 0  | 0 | 0 | 0  |   |
|                                                                                                                                                                                                                                                                                                                                                                                                                                                                                                                                                                                                                                                                                                                                                                                                                                                  | 0  | 0 | 0  | 0  | 0  | 0  | 0  | 0   | 0  | 0 | 0  | 0 | 0 | 0 | 0  | 0 | 0 | 0  | 0 | 0 | 0 | 0 | 0  | 0 | 0 |    |   |
| M02255_77_000000000-ADUT3_1_1104_22968_10622 T---AC---GT-AT-GGG-----GCA-A-G-----C--G--T---T-GT-C-CGG-AA-----TT-A--T-T--GG-GC-----GT--A----AA-GG-GT-AC-----G-TA-G-G-C-G-----G--T-TA-T-T-T-----<br>-----AA---G-T-C-C-----T-A-A--T--TA--A-AA-GG--C-A-AT-G-G----CT-C-AA-----C-C-A-T-T-G-T--A-----A-G--G-T---T-A-----G--GA-A-A--C-----T--A-G--AT--A-A-C---T-T-G-A-G-T-A--G-AT----GA-G-G-----G-G-A-A--AG-T-----GG--A--ATT---C-<br>C-A-T-GT--GT-A-G-CG-GT--G---A--A-A---TG-C-GT-AG--AT-A-TA--T-G--G-A-G-G-A-AC-A-CC---TG--T--G--GC-GAA-G--G-C-G-----A--C-T-T-T---CTG--G--AA-T-C-----A-A---A-C-T--GA--CG-C-T-G--A-GG--T-A-CG-A-AG-G-C---G-TG--GG-G-<br>-AG-C-A-AA-----CA--GG Bacteria(100);Firmicutes(100);Clostridia(100);Clostridiales(100);Family_XI_Incertae_Sedis(100);Helcococcus(100);unclassified(100);unclassified(100);unclassified(100);      |    |   |    |    |    |    |    |     |    |   |    |   |   |   |    |   |   |    |   |   |   |   |    |   |   |    |   |



|                                                                                                                                                                                                                            |   |   |   |    |   |    |   |   |    |   |   |   |   |   |   |   |   |   |     |   |   |   |   |   |   |   |   |   |
|----------------------------------------------------------------------------------------------------------------------------------------------------------------------------------------------------------------------------|---|---|---|----|---|----|---|---|----|---|---|---|---|---|---|---|---|---|-----|---|---|---|---|---|---|---|---|---|
| Otu1690                                                                                                                                                                                                                    | 2 | 0 | 0 | 0  | 0 | 0  | 0 | 0 | 0  | 0 | 0 | 0 | 0 | 0 | 0 | 0 | 0 | 0 | 0   | 0 | 0 | 0 | 0 | 0 | 0 | 0 | 0 |   |
|                                                                                                                                                                                                                            | 0 | 0 | 0 | 0  | 0 | 2  | 0 | 0 | 0  | 0 | 0 | 0 | 0 | 0 | 0 | 0 | 0 | 0 | 0   | 0 | 0 | 0 | 0 | 0 | 0 | 1 | 0 |   |
|                                                                                                                                                                                                                            | 0 | 0 | 0 | 0  | 0 | 0  | 0 | 0 | 0  | 0 | 0 | 0 | 0 | 0 | 0 | 0 | 0 | 0 | 0   | 0 | 0 | 0 | 0 | 0 | 0 | 0 | 0 |   |
|                                                                                                                                                                                                                            | 0 | 0 | 0 | 3  | 0 | 0  | 0 | 0 | 0  | 0 | 0 | 0 | 0 | 0 | 0 | 0 | 2 | 0 | 0   | 5 | 0 | 0 | 0 | 0 | 0 | 6 |   |   |
| M02255_77_000000000-ADUT3_1_1115_14942_2302 .....AC---T-A-CGT-----GCC-A-G-----C-A-G--C--CG-C-GGT-AA-----TA-C-G-T--AG-GG-----TG--C----GA-GC-GT-GA-----A-TC-G--G-A-----A-T-TA-C-T-T-----AA----                               |   |   |   |    |   |    |   |   |    |   |   |   |   |   |   |   |   |   |     |   |   |   |   |   |   |   |   |   |
| G-C-A-G-----G-A-T-G--TG--A-AA-TC--C-C-CG-G-G-----CT-C-AA-----C-C-T-G-G-G-A--A-C---T-G--C-G--T--T-----C-TG-A-A--C-----T--G-G-GT--G-A-C---T-A-G-A-G-T--G--T-GT----CA-G-A-----G-G-G-A--GG-T-----AG--A--ATT---C-C-A-C-GT-      |   |   |   |    |   |    |   |   |    |   |   |   |   |   |   |   |   |   |     |   |   |   |   |   |   |   |   |   |
| -GT-A-G-CA-GT--G---A--A-A--TG-C-GT-AG--AG-A-TG--T-G--G-A-G-G-A-AT-A-CC--GA--T--G--GC-GAA-G--G-C--A-----G--C-C-T-C---CTG--G--GA-T-A-----A-C---A-C-T--GA--CG-T-T-C--A-TG--C-T-CG-A--AA-G-C---G-TG--GG-T--AG-C-A-             |   |   |   |    |   |    |   |   |    |   |   |   |   |   |   |   |   |   |     |   |   |   |   |   |   |   |   |   |
| AA-----CA--GG      Bacteria(100);Proteobacteria(100);Betaproteobacteria(100);Neisseriales(100);Neisseriaceae(100);Neisseria(100);unclassified(100);unclassified(100);unclassified(100);                                    |   |   |   |    |   |    |   |   |    |   |   |   |   |   |   |   |   |   |     |   |   |   |   |   |   |   |   |   |
| Otu1691                                                                                                                                                                                                                    | 0 | 0 | 0 | 54 | 0 | 0  | 0 | 0 | 0  | 0 | 0 | 0 | 0 | 0 | 0 | 0 | 0 | 0 | 3   | 0 | 0 | 0 | 0 | 0 | 0 | 0 | 0 |   |
|                                                                                                                                                                                                                            | 0 | 0 | 0 | 0  | 0 | 0  | 0 | 0 | 0  | 0 | 0 | 0 | 0 | 0 | 0 | 0 | 0 | 0 | 0   | 0 | 0 | 0 | 0 | 0 | 0 | 0 | 0 |   |
|                                                                                                                                                                                                                            | 0 | 0 | 0 | 0  | 0 | 0  | 0 | 0 | 0  | 0 | 0 | 0 | 0 | 0 | 0 | 0 | 0 | 0 | 0   | 0 | 0 | 0 | 0 | 0 | 0 | 0 | 0 |   |
|                                                                                                                                                                                                                            | 0 | 0 | 0 | 0  | 0 | 0  | 0 | 0 | 0  | 0 | 0 | 0 | 0 | 0 | 0 | 0 | 0 | 0 | 0   | 0 | 0 | 0 | 0 | 0 | 0 | 0 | 0 |   |
| M02255_77_000000000-ADUT3_1_1105_7395_23170 T---AC---GT-AG-GTG-----ACA-A-G-----C-G--T--T--GT-C-CGG-AT-----TT-A--C-T--GG-GT-----GT--A-----AA-GG-GC-GT-----G-TA-G-G-C-G-----G--G-AT-A-G-C-----AA-                            |   |   |   |    |   |    |   |   |    |   |   |   |   |   |   |   |   |   |     |   |   |   |   |   |   |   |   |   |
| ---G-T-C-A-----G-T-C--G--TG--A-AA-TA--C-C-GA-G-G-----CT-C-AA-----C-C-T-C-G-G-G--G-C---T-G--C-G--A--T-----T--GA-A-A--C-----T--G-T-TA--T-T-C---T-T-G-A-G-T--A--T-CG----GA-G-A-----G-G-A-A--AG-C-----GG--A--ATT---C-C-C-A-    |   |   |   |    |   |    |   |   |    |   |   |   |   |   |   |   |   |   |     |   |   |   |   |   |   |   |   |   |
| GT--GT-A-G-CG-GT--G---A--A-A--TG-C-GT-AG--AT-A-TT--G-G--G-A-G-G-A-AC-A-CC--AG--T--G--GC-GAA-G--G-C--G-----G--C-T-T-T--CTG--G--AC-G-A-----C-A--A-C-T--GA--CG-C-T-G--A-GG--C-G-CG-A--AA-G-T---G-TG--GG-G--AG-                |   |   |   |    |   |    |   |   |    |   |   |   |   |   |   |   |   |   |     |   |   |   |   |   |   |   |   |   |
| C-A-AA-----CA--GG      Bacteria(100);Firmicutes(100);Clostridia(100);Clostridiales(100);unclassified(100);unclassified(100);unclassified(100);unclassified(100);unclassified(100);                                         |   |   |   |    |   |    |   |   |    |   |   |   |   |   |   |   |   |   |     |   |   |   |   |   |   |   |   |   |
| Otu1692                                                                                                                                                                                                                    | 0 | 0 | 0 | 0  | 0 | 0  | 0 | 0 | 12 | 0 | 0 | 0 | 0 | 0 | 0 | 0 | 0 | 0 | 0   | 0 | 0 | 0 | 0 | 0 | 0 | 0 | 0 |   |
|                                                                                                                                                                                                                            | 0 | 0 | 0 | 0  | 0 | 0  | 0 | 0 | 0  | 0 | 0 | 0 | 0 | 0 | 0 | 0 | 0 | 0 | 0   | 0 | 0 | 0 | 0 | 0 | 0 | 0 | 0 |   |
|                                                                                                                                                                                                                            | 0 | 0 | 0 | 0  | 0 | 0  | 0 | 0 | 0  | 0 | 0 | 0 | 0 | 0 | 0 | 0 | 1 | 0 | 0   | 0 | 0 | 0 | 0 | 0 | 4 | 0 | 0 | 0 |
|                                                                                                                                                                                                                            | 0 | 0 | 0 | 0  | 0 | 0  | 0 | 0 | 0  | 0 | 0 | 0 | 0 | 0 | 0 | 0 | 0 | 0 | 0   | 0 | 0 | 0 | 0 | 1 | 0 | 0 |   |   |
| M02255_76_000000000-ADUNE_1_1113_24061_15740      T---CG--GC-TA-ACT-----CCG-T-GC-----C-A--G--C--AG-C-CGC-GG-----TA-A--T-A--CG-GA-----GG--A-----TC-CG-GG-CG-----T-TA-T-C-C-G-----G--A-TG-TAT-T-----                         |   |   |   |    |   |    |   |   |    |   |   |   |   |   |   |   |   |   |     |   |   |   |   |   |   |   |   |   |
| -----AA---G-T-C-A-----G-T-T--G--TG--A-AA-GT--T-T-GC-G-G-----CT-C-AA-----C-C-G-T-A-A-A--A-T---T-G--C-A--G--T-----T--GA-T-A--C-----T--G-G--AT--A-T-C---T-T-G-A-G-T--G--C-AG----TT-G-A-----G-G-C-A--GG-C-----GG--A--ATT---C-  |   |   |   |    |   |    |   |   |    |   |   |   |   |   |   |   |   |   |     |   |   |   |   |   |   |   |   |   |
| G-T-G-GT--GT-A-G-CG-GT--G---A--A-A--TG-C-TT-AG--AT-A-TC--A-C--G-A-A-G-A-AC-T-CC--GA--T--T--GC-GAA-G--G-C--A-----G--C-C-T-G---CTA--A--GC-T-G-----C-A--A-C-T--GA--CA-T-T-G--A-GG--C-T-CG-A--AA-G-T---G-TG--GG-T--            |   |   |   |    |   |    |   |   |    |   |   |   |   |   |   |   |   |   |     |   |   |   |   |   |   |   |   |   |
| AT-C-A-AA-----CA--GG      Bacteria(100);Bacteroidetes(100);Bacteroidia(100);Bacteroidales(100);Bacteroidaceae(100);Bacteroides(100);unclassified(100);unclassified(100);unclassified(100);                                 |   |   |   |    |   |    |   |   |    |   |   |   |   |   |   |   |   |   |     |   |   |   |   |   |   |   |   |   |
| Otu1693                                                                                                                                                                                                                    | 0 | 0 | 0 | 0  | 0 | 0  | 0 | 0 | 0  | 0 | 0 | 0 | 4 | 0 | 0 | 0 | 0 | 0 | 0   | 0 | 0 | 0 | 0 | 0 | 0 | 0 | 0 |   |
|                                                                                                                                                                                                                            | 0 | 0 | 0 | 0  | 0 | 22 | 0 | 0 | 0  | 0 | 0 | 0 | 0 | 0 | 0 | 0 | 0 | 0 | 734 | 0 | 0 | 0 | 0 | 0 | 0 | 0 | 1 |   |
|                                                                                                                                                                                                                            | 0 | 0 | 0 | 0  | 0 | 0  | 0 | 0 | 0  | 0 | 0 | 0 | 0 | 0 | 0 | 0 | 0 | 0 | 0   | 0 | 0 | 0 | 0 | 0 | 0 | 0 | 0 |   |
|                                                                                                                                                                                                                            | 0 | 0 | 0 | 0  | 0 | 0  | 0 | 0 | 0  | 0 | 0 | 0 | 0 | 0 | 0 | 0 | 0 | 0 | 0   | 0 | 0 | 0 | 0 | 0 | 0 | 0 | 0 |   |
| M02255_77_000000000-ADUT3_1_2114_23450_11350      T---AC---GG-AG-GGT-----GCA-A-G-----C-G--T--T--AC-T-CGG-AA-----TC-A--C-T--GG-GC-----GT--A-----AA-GG-AT-GC-----G-TA-G-G-C-T-----G--T-AA-T-A-T-----                         |   |   |   |    |   |    |   |   |    |   |   |   |   |   |   |   |   |   |     |   |   |   |   |   |   |   |   |   |
| -----AA---G-T-C-A-----G-A-A--G--TG--A-AA-TC--C-A-AC-G-G-----CT-T-AA-----C-C-G-T-T-G-A--A-C---T-G--C-T---T--T-----T--GA-A-A--C-----T--G-T--TT--T-A-C---T-A-G-A-A-T--A--T-GG----GA-G-A-----G-G-T-A--GA-T-----GG--A--ATT---G- |   |   |   |    |   |    |   |   |    |   |   |   |   |   |   |   |   |   |     |   |   |   |   |   |   |   |   |   |
| G-T-G-GT--GT-A-G-GG-GT--A---A--A-A--TC-C-GT-AG--AT-A-TC--A-C--C-A-G-G-A-AT-A-CC--GA--T--T--GC-GAA-G--G-C--G-----A--T-C-T-A--CTG--G--AA-C-A-----T-T---A-T-T--GA--CG-C-T-G--A-GG--C-A-TG-A--AA-G-C---G-TG--GG-G--            |   |   |   |    |   |    |   |   |    |   |   |   |   |   |   |   |   |   |     |   |   |   |   |   |   |   |   |   |
| AG-C-A-AA-----CA--GG      Bacteria(100);Proteobacteria(100);Epsilonproteobacteria(100);Campylobacterales(100);Campylobacteraceae(100);Sulfurospirillum(100);unclassified(100);unclassified(100);unclassified(100);         |   |   |   |    |   |    |   |   |    |   |   |   |   |   |   |   |   |   |     |   |   |   |   |   |   |   |   |   |
| Otu1694                                                                                                                                                                                                                    | 0 | 0 | 0 | 0  | 0 | 2  | 0 | 0 | 0  | 0 | 0 | 0 | 0 | 0 | 0 | 0 | 0 | 0 | 0   | 0 | 0 | 0 | 0 | 0 | 9 | 8 | 0 | 0 |
|                                                                                                                                                                                                                            | 0 | 0 | 0 | 0  | 0 | 0  | 0 | 0 | 0  | 0 | 0 | 0 | 0 | 0 | 0 | 0 | 0 | 0 | 0   | 0 | 0 | 0 | 0 | 0 | 0 | 0 | 0 |   |
|                                                                                                                                                                                                                            | 0 | 0 | 0 | 0  | 0 | 0  | 0 | 0 | 0  | 0 | 0 | 0 | 0 | 0 | 0 | 0 | 0 | 0 | 0   | 0 | 0 | 0 | 0 | 0 | 0 | 0 | 0 |   |
|                                                                                                                                                                                                                            | 0 | 0 | 0 | 0  | 0 | 0  | 0 | 0 | 0  | 0 | 0 | 0 | 0 | 0 | 0 | 0 | 0 | 1 | 0   | 0 | 0 | 0 | 1 | 0 | 0 |   |   |   |
| M02255_76_000000000-ADUNE_1_2114_25308_22707      G---AA---GC-AC-CGG-----CTA-A-C-----T--C--C---G--TG-C-CAG-CA-----GC-C--G-C--GG-TA-----AT--A-----CG-GA-GG-GT-----G-CG-A-G-C-G-----T--TAAT-C-G-G----                        |   |   |   |    |   |    |   |   |    |   |   |   |   |   |   |   |   |   |     |   |   |   |   |   |   |   |   |   |
| -----AA---G-C-A-A-----G-A-T--G--TG--A-AA-GC--C-C-GG-G-G-----CT-C-AA-----C-C-T-C-G-G-A--A-C---A-G--C-A---T--T-----T--TG-A-A--C-----T--G-G--CA--G-A-C---T-A-G-A-G-T--C---T-TG----TA-G-A-----G-G-G-G--GG-T-----AG--A--ATT---- |   |   |   |    |   |    |   |   |    |   |   |   |   |   |   |   |   |   |     |   |   |   |   |   |   |   |   |   |
| T-C-A-G-GT--GT-A-G-CG-GT--G---A--A-A--TG-C-GT-AG--AG-A-TC--T-G--A-A-G-G-A-AT-A-CC--GG--T--G--GC-GAA-G--G-C--G-----G--C-C-C-C---CTG--G--AC-A-A-----A-G---A-C-T--GA--CG-C-T-C--A-GA--T-G-CG-A--AA-G-C---G-TG--               |   |   |   |    |   |    |   |   |    |   |   |   |   |   |   |   |   |   |     |   |   |   |   |   |   |   |   |   |
| GG-G--AG-C-A-AA-----CA--GG      Bacteria(100);Proteobacteria(100);Gammaproteobacteria(100);Vibrionales(100);Vibrionaceae(100);Photobacterium(100);unclassified(100);unclassified(100);unclassified(100);                   |   |   |   |    |   |    |   |   |    |   |   |   |   |   |   |   |   |   |     |   |   |   |   |   |   |   |   |   |



|                                                                                                                                                                                                                           |    |     |    |   |   |   |   |   |   |   |    |   |   |   |   |   |   |   |   |   |   |   |   |    |   |   |   |   |
|---------------------------------------------------------------------------------------------------------------------------------------------------------------------------------------------------------------------------|----|-----|----|---|---|---|---|---|---|---|----|---|---|---|---|---|---|---|---|---|---|---|---|----|---|---|---|---|
| Otu1695                                                                                                                                                                                                                   | 0  | 0   | 0  | 0 | 0 | 0 | 0 | 0 | 0 | 1 | 0  | 0 | 0 | 0 | 0 | 0 | 0 | 0 | 0 | 0 | 0 | 0 | 0 | 0  | 8 | 0 | 0 | 0 |
|                                                                                                                                                                                                                           | 0  | 0   | 0  | 0 | 0 | 0 | 0 | 0 | 0 | 0 | 0  | 0 | 0 | 0 | 0 | 0 | 0 | 0 | 0 | 0 | 0 | 0 | 0 | 0  | 0 | 0 | 0 |   |
|                                                                                                                                                                                                                           | 0  | 0   | 0  | 0 | 0 | 0 | 0 | 0 | 0 | 0 | 0  | 0 | 0 | 0 | 0 | 0 | 0 | 0 | 0 | 0 | 0 | 0 | 0 | 0  | 0 | 0 | 0 |   |
|                                                                                                                                                                                                                           | 0  | 0   | 0  | 0 | 0 | 0 | 0 | 0 | 0 | 0 | 0  | 0 | 0 | 0 | 0 | 0 | 0 | 0 | 1 | 0 | 0 | 0 | 0 | 0  | 0 |   |   |   |
| M02255_76_000000000-ADUNE_1_1107_19073_2634 A---AC---AG-AA-GAA-----GCA-C-C-----G--G--C---T--AACT-CCG-TG-----CC-AG-C-A-GCC-GC-----GG--T----AA-TA-CG-GA-----G-GG-T-G-C-G-----A--G-CT-G-T-T-----                             |    |     |    |   |   |   |   |   |   |   |    |   |   |   |   |   |   |   |   |   |   |   |   |    |   |   |   |   |
| AA---T-C-A-G-----G-A-A-G--TG--A-AA-GC--C-C-GG-G-G----CT-C-AA-----C-C-T-C-G-G-A-A-C---A-G-C-A---T-T-----T--TG-A-A---C-----T--G-G--CA-G-A-C---T-A-G-A-G-T-C---T-TG----TA-G-A-----G-G-G-G---GG-T-----AG--A--ATT---T-C-A-     |    |     |    |   |   |   |   |   |   |   |    |   |   |   |   |   |   |   |   |   |   |   |   |    |   |   |   |   |
| G-GT--GT-A-G-CG-GT--G---A--A-A---TG-C-GT-AG--AG-A-TC--T-G--A-A-G-G-A-AT-A-CC--GG--T--G--GC-GAA-G--G-C--G-----G--C-C-C-C---CTG--G--AC-A-A-----A-G---A-C-T--GA--CG-C-T-C--A-GA--T-G-CG-A--AA-G-C---G-TG--GG-G--             |    |     |    |   |   |   |   |   |   |   |    |   |   |   |   |   |   |   |   |   |   |   |   |    |   |   |   |   |
| AG-C-A-AA-----CA--GG Bacteria(100);Proteobacteria(100);Gammaproteobacteria(100);Vibrionales(100);Vibrionaceae(100);unclassified(100);unclassified(100);unclassified(100);unclassified(100);                               |    |     |    |   |   |   |   |   |   |   |    |   |   |   |   |   |   |   |   |   |   |   |   |    |   |   |   |   |
| Otu1696                                                                                                                                                                                                                   | 0  | 0   | 44 | 0 | 0 | 0 | 0 | 0 | 0 | 0 | 0  | 0 | 0 | 0 | 0 | 0 | 0 | 0 | 0 | 0 | 0 | 0 | 0 | 0  | 0 | 0 | 0 |   |
|                                                                                                                                                                                                                           | 0  | 0   | 0  | 0 | 0 | 0 | 0 | 0 | 0 | 0 | 0  | 0 | 0 | 0 | 0 | 0 | 0 | 0 | 0 | 0 | 0 | 0 | 0 | 0  | 0 | 0 | 0 |   |
|                                                                                                                                                                                                                           | 0  | 0   | 0  | 0 | 0 | 0 | 0 | 0 | 0 | 0 | 0  | 0 | 0 | 0 | 0 | 0 | 0 | 0 | 0 | 0 | 0 | 0 | 0 | 0  | 0 | 0 | 0 |   |
|                                                                                                                                                                                                                           | 0  | 0   | 0  | 0 | 0 | 2 | 0 | 0 | 0 | 0 | 0  | 0 | 0 | 0 | 0 | 0 | 0 | 0 | 0 | 0 | 0 | 0 | 0 | 0  | 0 |   |   |   |
| M02255_77_000000000-ADUT3_1_2116_29435_14777 T---AC---GT-AG-GTG-----GCA-A-G-----C--G--T---T--AT-C-CGG-AT-----TT-A--T-T-GG-GT-----GT--A----AA-GG-GC-GT-----G-TA-G-G-C-G-----G--G-AT-T-G-C-----                             |    |     |    |   |   |   |   |   |   |   |    |   |   |   |   |   |   |   |   |   |   |   |   |    |   |   |   |   |
| -----AA---G-T-C-A-----G-A-T-G--TG--A-AA-AC--T-G-GG-G-G----CT-C-AA-----C-C-T-C-C-A-G--C-C---T-G--C-A---T-T-----T--GA-A-A---C-----T--G-T--AG--T-T-C---T-T-G-A-G-T-G---T-CG----GA-G-A-----G-G-C-A---AT-C-----GG--A--ATT---C- |    |     |    |   |   |   |   |   |   |   |    |   |   |   |   |   |   |   |   |   |   |   |   |    |   |   |   |   |
| C-G-T-GT--GT-A-G-CG-GT--G---A--A-A---TG-C-GT-AG--AT-A-TA--C-G--G-A-G-G-A-AC-A-CC--AG--T--G--GC-GAA-G--G-C--G-----G--A-T-T-G---CTG--G--AC-G-A-----T-A---A-C-T--GA--CG-C-T-G--A-GG--C-G-CG-A--AA-G-C---G-TG--GG-G--         |    |     |    |   |   |   |   |   |   |   |    |   |   |   |   |   |   |   |   |   |   |   |   |    |   |   |   |   |
| G--AG-C-A-AA-----CA--GG Bacteria(100);Firmicutes(100);Clostridia(100);Clostridiales(100);Ruminococcaceae(100);unclassified(100);unclassified(100);unclassified(100);unclassified(100);                                    |    |     |    |   |   |   |   |   |   |   |    |   |   |   |   |   |   |   |   |   |   |   |   |    |   |   |   |   |
| Otu1697                                                                                                                                                                                                                   | 0  | 163 | 55 | 0 | 0 | 0 | 0 | 0 | 0 | 0 | 0  | 0 | 0 | 0 | 0 | 0 | 0 | 0 | 0 | 0 | 0 | 0 | 0 | 0  | 0 | 0 | 0 |   |
|                                                                                                                                                                                                                           | 0  | 0   | 0  | 0 | 0 | 0 | 0 | 0 | 0 | 0 | 76 | 0 | 0 | 0 | 0 | 0 | 0 | 0 | 0 | 0 | 0 | 0 | 0 | 0  | 0 | 0 | 0 |   |
|                                                                                                                                                                                                                           | 0  | 0   | 0  | 0 | 0 | 0 | 0 | 0 | 0 | 0 | 0  | 0 | 0 | 0 | 0 | 0 | 0 | 0 | 0 | 0 | 0 | 1 | 0 | 0  | 0 | 0 | 0 |   |
|                                                                                                                                                                                                                           | 27 | 0   | 0  | 0 | 0 | 0 | 0 | 0 | 0 | 0 | 0  | 0 | 0 | 0 | 0 | 0 | 0 | 0 | 0 | 0 | 0 | 0 | 0 | 10 | 0 |   |   |   |
| M02255_77_000000000-ADUT3_1_1106_8732_13626 T---AC---GT-AG-GGG-----GCA-A-G-----C--G--T---T--AT-C-CGG-AT-----TT-A--C-T--GG-GT-----GT--A----AA-GG-GT-GC-----G-TA-G-G-T-G-----G--C-AA-G-G-C-----                             |    |     |    |   |   |   |   |   |   |   |    |   |   |   |   |   |   |   |   |   |   |   |   |    |   |   |   |   |
| AA---G-T-C-A-----G-A-T-G--TG--A-AA-GC--C-C-GG-G-G----CT-C-AA-----C-C-C-C-G-G-T--A-C---T-G--C-A---T-T-----T--GA-A-A---C-----T--G-T--CT--A-G-C---T-A-G-A-G-T-G---C-AG----GA-G-A-----G-G-T-A--AG-C-----GG--A--ATT---C-C-T-   |    |     |    |   |   |   |   |   |   |   |    |   |   |   |   |   |   |   |   |   |   |   |   |    |   |   |   |   |
| A-GT--GT-A-G-CG-GT--G---A--A-A---TG-C-GT-AG--AT-A-TT--A-G--G-A-G-G-A-AC-A-CC--AG--T--G--GC-GAA-G--G-C--G-----G--C-T-T-A---CTG--G--AC-T-G-----T-A---A-C-T--GA--CA-C-T-G--A-GG--C-A-CG-A--AA-G-C---G-TG--GG-G--             |    |     |    |   |   |   |   |   |   |   |    |   |   |   |   |   |   |   |   |   |   |   |   |    |   |   |   |   |
| AG-C-A-AA-----CA--GG Bacteria(100);Firmicutes(100);Clostridia(100);Clostridiales(100);Lachnospiraceae(100);unclassified(100);unclassified(100);unclassified(100);unclassified(100);                                       |    |     |    |   |   |   |   |   |   |   |    |   |   |   |   |   |   |   |   |   |   |   |   |    |   |   |   |   |
| Otu1698                                                                                                                                                                                                                   | 0  | 63  | 0  | 0 | 0 | 0 | 0 | 0 | 0 | 0 | 0  | 0 | 0 | 0 | 0 | 0 | 0 | 0 | 0 | 0 | 0 | 0 | 0 | 0  | 0 | 0 | 0 |   |
|                                                                                                                                                                                                                           | 0  | 0   | 0  | 0 | 0 | 0 | 0 | 0 | 0 | 0 | 0  | 0 | 0 | 0 | 0 | 0 | 0 | 0 | 0 | 0 | 0 | 0 | 0 | 0  | 0 | 0 | 0 |   |
|                                                                                                                                                                                                                           | 0  | 0   | 0  | 0 | 0 | 0 | 0 | 0 | 0 | 0 | 0  | 0 | 0 | 0 | 0 | 0 | 0 | 0 | 0 | 0 | 0 | 0 | 0 | 0  | 0 | 0 | 0 |   |
|                                                                                                                                                                                                                           | 0  | 0   | 0  | 0 | 0 | 0 | 0 | 0 | 0 | 0 | 0  | 0 | 0 | 0 | 0 | 0 | 0 | 0 | 0 | 0 | 0 | 0 | 0 | 0  | 0 |   |   |   |
| M02255_77_000000000-ADUT3_1_1107_24542_12219 T---AC---GT-AG-GTG-----GCA-A-G-----C--G--T---T--GT-C-CGG-AA-----TT-A--C-T--GG-GT-----GT--A----AA-GG-GA-GC-----G-TA-G-G-C-G-----G--G-AA-G-A-C---                              |    |     |    |   |   |   |   |   |   |   |    |   |   |   |   |   |   |   |   |   |   |   |   |    |   |   |   |   |
| -----AA---G-T-T-G-----G-G-A--G--TG--A-AA-TG--T-A-TG-G-G----CT-T-AA-----C-C-C-A-TAA-A---C---T-G--C-T---T-T-----C--AA-A-A---C-----T--G-T--TT--T-T-C---T-T-G-A-G-T-G---A-AG----TA-G-A-----G-G-C-A---GG-C-----GG--A--ATT---C- |    |     |    |   |   |   |   |   |   |   |    |   |   |   |   |   |   |   |   |   |   |   |   |    |   |   |   |   |
| C-T-A-GT--GT-A-G-CG-GT--G---A--A-A---TG-C-GT-AAA-T--A-TT--A-G--G-A-G-G-A-AC-A-CC--AG--T--G--GC-GAA-G--G-C--G-----G--C-C-T-G---CTG--G--GC-T-T-----T-A---A-C-T--GA--CG-C-T-G--A-GG--C-T-CG-A--AA-G-C---G-TG--GG-T-          |    |     |    |   |   |   |   |   |   |   |    |   |   |   |   |   |   |   |   |   |   |   |   |    |   |   |   |   |
| -AG-C-A-AA-----CA--GG Bacteria(100);Firmicutes(100);Clostridia(100);Clostridiales(100);Ruminococcaceae(100);unclassified(100);unclassified(100);unclassified(100);unclassified(100);                                      |    |     |    |   |   |   |   |   |   |   |    |   |   |   |   |   |   |   |   |   |   |   |   |    |   |   |   |   |
| Otu1699                                                                                                                                                                                                                   | 0  | 0   | 0  | 0 | 0 | 0 | 0 | 0 | 0 | 5 | 0  | 0 | 0 | 0 | 0 | 0 | 0 | 0 | 0 | 0 | 0 | 0 | 0 | 0  | 0 | 0 | 2 |   |
|                                                                                                                                                                                                                           | 0  | 0   | 0  | 0 | 0 | 0 | 0 | 0 | 0 | 0 | 0  | 0 | 0 | 0 | 0 | 0 | 0 | 0 | 2 | 0 | 0 | 0 | 0 | 0  | 0 | 0 | 0 |   |
|                                                                                                                                                                                                                           | 0  | 0   | 0  | 0 | 0 | 0 | 0 | 0 | 0 | 0 | 0  | 0 | 0 | 0 | 0 | 0 | 0 | 0 | 0 | 0 | 0 | 0 | 0 | 0  | 0 | 0 | 0 |   |
|                                                                                                                                                                                                                           | 0  | 0   | 0  | 0 | 0 | 0 | 0 | 0 | 0 | 0 | 0  | 0 | 0 | 0 | 0 | 0 | 0 | 0 | 0 | 0 | 0 | 0 | 0 | 0  | 0 |   |   |   |
| M02255_76_000000000-ADUNE_1_2114_19309_22621 A---AC---AG-AA-GAA-----GCA-C-C-----G--G--C---T--AACT-CCG-TG-----CC-A--G-C--AG-CC-----GC--G----GT-AA-TA-CG-----G-AG-G-G-T-GC-----G--A-GC-G-T-T---                             |    |     |    |   |   |   |   |   |   |   |    |   |   |   |   |   |   |   |   |   |   |   |   |    |   |   |   |   |
| -----AA---G-T-C-G-----G-A-A--G--TG--A-AA-GC--C-C-GG-G-G----CT-C-AA-----C-C-T-C-G-G-A--A-G---G-T--C-A---T-T-----T--GA-A-A---C-----T--G-G--CA--A-A-C---T-A-G-A-G-T-A---C-TG----TA-G-A-----G-G-G-G---GG-T-----AG--A--ATT---  |    |     |    |   |   |   |   |   |   |   |    |   |   |   |   |   |   |   |   |   |   |   |   |    |   |   |   |   |
| -T-C-A-G-GT--GT-A-G-CG-GT--G---A--A-A---TG-C-GT-AG--AG-A-TC--T-G--A-A-G-G-A-AT-A-CC--AG--T--G--GC-GAA-G--G-C--G-----G--C-C-C-C---CTG--G--AC-A-G-----A-T---A-C-T--GA--CA-C-T-C--A-GA--T-G-CG-A--AA-G-C---G-TG--            |    |     |    |   |   |   |   |   |   |   |    |   |   |   |   |   |   |   |   |   |   |   |   |    |   |   |   |   |
| GG-G--AG-C-A-AA-----CA--GG Bacteria(100);Proteobacteria(100);Gammaproteobacteria(100);Vibrionales(100);Vibrionaceae(100);unclassified(100);unclassified(100);unclassified(100);unclassified(100);                         |    |     |    |   |   |   |   |   |   |   |    |   |   |   |   |   |   |   |   |   |   |   |   |    |   |   |   |   |



Otu1700 0 39 0 0 0 0 0 0 0 0 0 0 0 0 0 0 0 0 0 0 0 0 0 0 0 0 6  
0 0 0 0 134 0 79 0 0 0 0 0 0 0 0 0 0 0 0 0 0 0 0 1 0 0 0 0  
0 0 0 0 0 0 0 0 0 0 0 0 0 0 0 0 0 0 0 0 0 0 0 0 0 0 15  
0 0 0 0 0 0 0 1 0 0 0 0 0 0 0 60 0 0 0 0 0 0 0 0 0 0 0  
M02255\_77\_000000000-ADUT3\_1\_1109\_13800\_9467 T---AC---GA-AG-GGG-----GCT-A-G-----C--G--T---T--GT-T-CGG-AA-----TC-A--C-T--GG-GC-----GT--A----AA-GC-GC-AC-----G-TA-G-G-C-G-----G--A-CC-G-T-T-----  
AA---G-T-C-G-----G-A-G--G--TG--A-AA-GC--C-T-GG-G-G----CT-C-AA-----C-C-C-C-A-G-A--A-C---T-G--C-C---T-T-----C--GA-T-A--C-----T--G-G--CG--G-T-C---T-T-G-A-G-T--A---T-GG----TA-G-A-----G-G-T-T---GG-T-----GG--A--ACT---C-C-G-  
A-GT--GT-A-G-AG-GT--G---A--A---TT-C-GT-AG--AT-A-TT--C-G--G-A-A-G-A-AC-A-CC---AG--T--G--GC-GAA-G--G-C-G-----G--C-C-A-A---CTG--G--AC-C-A-----T-T---A-C-T--GA--CG-C-T-G--A-GG--T-G-CG-A--AA-G-C---G-TG--GG-G--  
AG-C-A-AA-----CA--GG Bacteria(100);Proteobacteria(100);Alphaproteobacteria(100);Rhizobiales(100);unclassified(100);unclassified(100);unclassified(100);unclassified(100);unclassified(100);

Otu1701 0 0 28 0 27 6 7 0 0 0 0 0 0 0 1 0 0 0 0 0 0 0 0 0 0 0 0 1  
0 0 14 0 0 0 0 0 10 0 0 0 0 0 0 0 2 0 0 0 0 0 0 0 0 0 0  
0 0 0 0 0 0 0 0 0 0 0 0 0 0 0 0 0 0 0 7 0 0 0 6 0 0 0 0  
4 0 4 9 0 0 0 0 0 0 0 0 0 6 0 0 0 0 5 19 13 7 16 0 0 0 0  
M02255\_77\_000000000-ADUT3\_1\_1109\_23501\_18373 T---AC---GT-GC-CAG-----CAGCC-G-----CG-G--T---A--AT-A-CGT-AG-----GT-G--G-C--GA-GC-----GTT--AT---CC-GGAAT-TA-----T-TG-G-G-C-G-----G--C-CT-G-T-T--  
-----AA---G-T-A-A-----G-T-G--G--TT--A-AA-TT--G-T-TG-G-G----CT-C-AA-----C-C-C-A-A-T-C-C-----A-G--C-C--A-C-----T--TA-A-A--C-----T--G-G--CA--G-G-C---T-A-G-A-G-T--A---T-TG----GA-G-A-----G-G-C-A--AG-T-----GG--A--ATT---  
C-C-A-T-GT--GT-A-G-CG-GT--A---A--A---TG-C-GT-AG--AT-A-TA--T-G--G-A-G-G-A-AC-A-CC---AG--T--G--GC-GAA-G--G-C-G-----G--C-T-T-G---CTA--G--CC-A-A-----A-G---A-C-T--GA--CG-C-T-C--A-TG--C-A-CG-A--AA-G-C---G-TG--GG-  
G--AG-C-A-AA-----TA--GG Bacteria(100);Firmicutes(100);Erysipelotrichi(100);Erysipelotrichales(100);Erysipelotrichaceae(100);Solobacterium(100);unclassified(100);unclassified(100);unclassified(100);

Otu1702 0 49 0 0 0 0 0 0 0 0 0 0 0 0 0 0 0 0 0 0 0 0 0 0 0 0 0  
0 0 0 0 0 0 0 0 0 0 0 0 0 0 0 0 0 0 0 0 0 0 0 0 0 0 0  
0 0 0 0 0 0 0 0 0 0 0 0 0 0 0 0 0 0 0 0 0 0 0 0 0 0 0  
0 0 0 0 0 0 0 0 0 0 0 0 0 0 0 0 0 0 0 0 0 0 0 0 0 0  
M02255\_77\_000000000-ADUT3\_1\_1111\_16102\_18618 T---AC---GT-AG-GGG-----GCG-A-G-----C--G--T---T--GT-C-CGG-AA-----TT-A--C-T--GG-GC-----GT--A----AA-GG-GA-GC-----G-TA-G-G-C-G-----G--T-CC-T-T-T-----  
-----AA---G-T-T-G-----G-A-T--G--TG--A-AA-GC--C-C-CG-G-G----CT-T-AA-----C-T-T-G-G-G-A--A-G---T-G--C-A---T-C-----C--AA-T-A--C-----T--G-G--AG--G-A-CT---T-G-G-A-G-T--A---C-AG----GA-G-A-----G-G-G-A--AG-C-----GG--A--ATT---  
C-C-T-A-GT--GT-A-G-CG-GT--G---A--A---TG-C-GT-AG--AT-A-TT--A-G--G-A-G-G-A-AC-A-CC---AG--T--G--GC-GAA-G--G-C-G-----G--C-T-T-T---CTG--G--AC-T-G-----A-C---A-C-T--GA--CG-C-T-G--A-GG--C-T-CG-A--AA-G-C---G-TG--GG-  
G--AG-C-A-AA-----CA--GG Bacteria(100);unclassified(100);unclassified(100);unclassified(100);unclassified(100);unclassified(100);unclassified(100);unclassified(100);unclassified(100);

Otu1703 0 0 0 0 0 48 0 0 0 0 0 0 0 0 0 0 0 0 0 0 0 0 0 0 0 0 0  
0 0 0 0 0 0 0 0 0 0 0 0 0 0 0 0 0 0 0 0 0 0 0 0 0 0 0  
0 0 0 0 0 0 0 0 0 0 0 0 0 0 0 0 0 0 0 0 0 0 0 0 0 0 0  
0 0 0 0 0 0 0 0 0 0 0 0 0 0 0 0 0 0 0 0 0 0 0 0 0 0  
M02255\_77\_000000000-ADUT3\_1\_1101\_10895\_14827 T---AC---GA-AG-GGA-----GCT-A-G-----C--G--T---T--GT-T-CGG-AT-----TT-A--C-T--GG-GC-----GT--A----AA-GA-GC-GT-----G-TA-G-G-C-G-----G--C-TT-T-G-C-----  
-----AA---G-T-T-G-----G-G-A--G--TG--A-AA-TC--C-C-CG-A-G----CT-C-AA-----C-T-C-C-G-G-A--A-C---T-G--C-A---T-T-----C--AA-A-A--C-----T--G-C--TT--A-G-C---T-A-G-A-G-T--A---T-GT----AA-G-A-----G-G-G-T---GA-C-----GG--A--ATT---C-  
C-T-A-GT--GT-A-G-AG-GT--G---A--A---TT-C-AT-AG--AT-A-TT--A-G--G-A-G-G-A-AC-A-CC---AG--T--G--GC-GAA-G--G-C-G-----G--T-C-A-C---CTG--G--GA-C-A-----T-T---A-C-T--GA--CG-C-T-G--A-GA--C-G-CG-A--AA-G-C---G-TG--GG-G-  
-AG-C-A-AA-----CA--GG Bacteria(100);unclassified(100);unclassified(100);unclassified(100);unclassified(100);unclassified(100);unclassified(100);unclassified(100);unclassified(100);

Otu1704 0 0 0 0 0 0 0 0 0 0 0 0 0 3 0 0 0 0 0 0 0 0 0 0 0 0 0  
0 0 0 0 0 0 0 0 0 0 0 0 0 0 0 0 0 0 0 0 0 0 0 0 0 0 0  
0 0 0 0 0 0 0 0 0 0 0 0 0 0 0 0 0 0 0 0 0 0 0 0 0 0 0  
0 0 0 0 0 0 0 0 0 0 0 0 0 0 0 0 0 0 0 0 0 0 0 0 0 0  
M02255\_77\_000000000-ADUT3\_1\_1112\_13041\_4839 C----TA---AC-TC-TGT-----GCC-A-G-----C--A--G---C--CG-C-GGT-AA-----TA-C--A-G--AG-GG-----GG--C----AA-GC-GT-TA-----A-TC-G-G---A-----A--T-TA-G-T-T-----AA--  
--G-T-T-G-----G-A-T--G--TG--A-AA-TC--C-C-CG-G-G----CT-C-AA-----C-C-T-G-G-G-A--A-C---T-G--C-A---T-T-----C--AA-A-A--C-----T--G-A-CT--G-A-C---T-A-G-A-G-T--A---T-GG----TA-G-A-----G-G-G-T---GG-T-----GG--A--ATT---T-C-C-T-  
GT--GT-A-G-CG-GT--G---A--A---TG-C-GT-AG--AT-A-TA--G-G--A-A-G-G-A-AC-A-CC---AG--T--G--GC-GAA-G--G-C-G-----A--C-C-A-C---CTG--G--AC-T-G-----A-T---A-C-T--GA--CA-C-T-G--A-GG--T-G-CG-A--AA-G-C---G-TG--GG-G--AG-  
C-A-AA-----CA--GG Bacteria(100);Proteobacteria(100);Gammaproteobacteria(100);Pseudomonadales(100);Pseudomonadaceae(100);unclassified(100);unclassified(100);unclassified(100);unclassified(100);



[illegible]



|                                                                                                                                                                                                                |   |   |     |   |   |    |     |   |    |    |    |   |   |    |    |    |   |   |    |   |    |   |    |    |   |   |   |   |
|----------------------------------------------------------------------------------------------------------------------------------------------------------------------------------------------------------------|---|---|-----|---|---|----|-----|---|----|----|----|---|---|----|----|----|---|---|----|---|----|---|----|----|---|---|---|---|
| Otu1710                                                                                                                                                                                                        | 0 | 0 | 24  | 0 | 0 | 0  | 0   | 0 | 0  | 0  | 0  | 0 | 0 | 0  | 0  | 0  | 0 | 0 | 0  | 0 | 0  | 0 | 0  | 0  | 0 | 0 | 0 |   |
|                                                                                                                                                                                                                | 0 | 0 | 0   | 0 | 0 | 0  | 0   | 0 | 0  | 0  | 0  | 0 | 0 | 0  | 0  | 0  | 0 | 0 | 0  | 0 | 0  | 0 | 0  | 0  | 0 | 0 | 0 |   |
|                                                                                                                                                                                                                | 0 | 0 | 0   | 0 | 0 | 0  | 0   | 0 | 0  | 0  | 0  | 0 | 0 | 0  | 0  | 0  | 0 | 0 | 0  | 0 | 0  | 0 | 0  | 0  | 0 | 0 | 0 |   |
|                                                                                                                                                                                                                | 0 | 0 | 0   | 0 | 0 | 0  | 0   | 0 | 0  | 0  | 0  | 0 | 0 | 0  | 0  | 0  | 0 | 0 | 0  | 0 | 0  | 0 | 0  | 0  | 0 | 0 | 0 |   |
| M02255_77_000000000-ADUT3_1_1103_2317_9858 T---AC---GT-AG-GTG-----GCG-A-G-----C-G-T---T-AT-C-CGG-AA-----TT-A-C-T-GG-GT-----GT-A---AA-GG-GT-GT-----G-TA-G-G-C-G-----G-G-AC-G-A-C-----                           |   |   |     |   |   |    |     |   |    |    |    |   |   |    |    |    |   |   |    |   |    |   |    |    |   |   |   |   |
| AA---G-T-C-A-----G-A-T-G-TG--A-AA-AT--T-G-CA-G-G----CT-C-AA-----C-C-T-G-G-A-A-A-G---T-G-C-A--T-T-----T-GA-A-A--C-----T-G-C-CG-T-T-C---T-T-G-A-G-A-G---T-CG----GA-G-A-----G-G-T-A--AA-T-----GG-A--ATT---C-C-C-  |   |   |     |   |   |    |     |   |    |    |    |   |   |    |    |    |   |   |    |   |    |   |    |    |   |   |   |   |
| G-GT--GT-A-G-CG-GT--G---A-A-A---TG-C-GT-AG--AT-A-TC--G-G--G-A-G-G-A-AC-A-CC--AG--T-G--GC-GAA-G-G-C-G-----A-T-T-T-A---CTG--G--AC-G-A-----C-A--A-C-T-GA--CG-C-T-G--A-GA--C-A-CG-A-AA-G-C--G-TG--GG-G--           |   |   |     |   |   |    |     |   |    |    |    |   |   |    |    |    |   |   |    |   |    |   |    |    |   |   |   |   |
| AG-C-A-AA-----CA--GG Bacteria(100);unclassified(100);unclassified(100);unclassified(100);unclassified(100);unclassified(100);unclassified(100);unclassified(100);unclassified(100);                            |   |   |     |   |   |    |     |   |    |    |    |   |   |    |    |    |   |   |    |   |    |   |    |    |   |   |   |   |
| Otu1711                                                                                                                                                                                                        | 0 | 0 | 0   | 0 | 0 | 0  | 0   | 0 | 0  | 0  | 4  | 3 | 0 | 0  | 1  | 4  | 0 | 0 | 10 | 4 | 0  | 5 | 0  | 1  | 0 | 0 | 3 | 0 |
|                                                                                                                                                                                                                | 0 | 0 | 0   | 0 | 0 | 0  | 0   | 0 | 0  | 0  | 0  | 0 | 0 | 0  | 0  | 0  | 6 | 0 | 0  | 0 | 39 | 0 | 21 | 62 | 2 | 0 | 0 |   |
|                                                                                                                                                                                                                | 1 | 2 | 4   | 6 | 2 | 14 | 5   | 0 | 26 | 18 | 3  | 1 | 0 | 19 | 0  | 0  | 1 | 4 | 0  | 0 | 0  | 0 | 0  | 0  | 0 | 0 | 0 |   |
|                                                                                                                                                                                                                | 0 | 0 | 0   | 0 | 0 | 0  | 2   | 0 | 37 | 0  | 17 | 0 | 1 | 9  | 41 | 0  | 0 | 0 | 0  | 0 | 0  | 0 | 0  | 0  | 0 | 0 | 0 |   |
| M02255_77_000000000-ADUT3_1_2116_21351_24941 T---AC---GT-AG-GGT-----GCA-A-G-----C-G-T---T-AA-T-CGG-AA-----TT-A-C-T-GG-GC-----GT-A---AA-GC-GT-GC-----G-CA-G-G-C-G-----G-T-TT-T-G-T-----                         |   |   |     |   |   |    |     |   |    |    |    |   |   |    |    |    |   |   |    |   |    |   |    |    |   |   |   |   |
| ----AA---G-T-C-T-----G-A-T-G-TG--A-AA-TC--C-C-CG-G-G----CT-C-AA-----C-C-T-G-G-G-A-A-T---T-G-C-A--T-T-----G-GA-G-A--C-----T-G-C-AA--G-G-C---T-A-G-A-A-T-C---T-GG----CA-G-A-----G-G-G-G--GG-T---AG-A--ATT---C-   |   |   |     |   |   |    |     |   |    |    |    |   |   |    |    |    |   |   |    |   |    |   |    |    |   |   |   |   |
| C-A-C-GT--GT-A-G-CA-GT--G---A-A-A---TG-C-GT-AG--AT-A-TG--T-G--G-A-G-G-A-AC-A-CC--GA--T-G--GC-GAA-G-G-C-A-----G-C-C-C-C---CTG--G--GT-C-A-----A-G--A-T-T-GA--CG-C-T-C--A-TG--C-A-CG-A-AA-G-C--G-TG--GG-G--       |   |   |     |   |   |    |     |   |    |    |    |   |   |    |    |    |   |   |    |   |    |   |    |    |   |   |   |   |
| -AG-C-A-AA-----CA--GG Bacteria(100);Proteobacteria(100);Betaproteobacteria(100);Burkholderiales(100);Oxalobacteraceae(100);Janthinobacterium(100);unclassified(100);unclassified(100);unclassified(100);       |   |   |     |   |   |    |     |   |    |    |    |   |   |    |    |    |   |   |    |   |    |   |    |    |   |   |   |   |
| Otu1712                                                                                                                                                                                                        | 0 | 0 | 0   | 0 | 0 | 0  | 0   | 0 | 0  | 0  | 6  | 0 | 0 | 1  | 0  | 14 | 0 | 0 | 3  | 0 | 0  | 0 | 0  | 1  | 0 | 0 | 0 |   |
|                                                                                                                                                                                                                | 3 | 0 | 0   | 0 | 0 | 0  | 0   | 0 | 0  | 0  | 1  | 0 | 0 | 0  | 0  | 0  | 0 | 3 | 0  | 5 | 0  | 0 | 0  | 0  | 0 | 0 | 1 |   |
|                                                                                                                                                                                                                | 0 | 0 | 0   | 0 | 0 | 0  | 0   | 0 | 0  | 0  | 1  | 0 | 0 | 1  | 0  | 0  | 0 | 0 | 0  | 0 | 0  | 0 | 0  | 0  | 0 | 0 | 0 |   |
|                                                                                                                                                                                                                | 0 | 0 | 0   | 0 | 0 | 0  | 0   | 0 | 0  | 0  | 0  | 0 | 0 | 0  | 0  | 0  | 1 | 0 | 0  | 0 | 0  | 0 | 0  | 0  | 0 | 0 | 0 |   |
| M02255_77_000000000-ADUT3_1_2109_26812_11010 T---AC---GT-AG-GTG-----GCA-A-G-----C-G-T---T-GT-C-CGG-AA-----TT-A--T-T-GG-GC-----GT-A---AA-GC-GC-GC-----G-CA-G-G-C-G-----G--T-CT-C-T-T-----                       |   |   |     |   |   |    |     |   |    |    |    |   |   |    |    |    |   |   |    |   |    |   |    |    |   |   |   |   |
| ----AA---G-T-C-T-----G-A-T-G-TG--A-AA-GC--C-C-CC-G-G----CT-C-AA-----C-C-G-G-G-G-A-G-----G-GT-C-A--T-T-----G--GA-A-A--C-----T-G-G--GA--G-A-C---T-T-G-A-G-G-A--C-AG----AA-G-A-----G-G-A-G--AG-T---GG-A--ATT---C- |   |   |     |   |   |    |     |   |    |    |    |   |   |    |    |    |   |   |    |   |    |   |    |    |   |   |   |   |
| C-C-A-A-GT--GT-A-G-CG-GT--G---A-A-A---TG-C-GT-AG--AT-A-TT--T-G--G-A-G-G-A-AC-A-CC--AG--T-G--GC-GAA-G-G-C-G-----G-C-T-C-T---CTG--G--TC-T-G-----T-T--A-C-T-GA--CG-C-T-G--A-GG--C-G-CG-A-AA-G-C--G-TG--GG-G--     |   |   |     |   |   |    |     |   |    |    |    |   |   |    |    |    |   |   |    |   |    |   |    |    |   |   |   |   |
| G--AG-C-A-AA-----CA--GG Bacteria(100);Firmicutes(100);Bacilli(100);Bacillales(100);unclassified(100);unclassified(100);unclassified(100);unclassified(100);unclassified(100);                                  |   |   |     |   |   |    |     |   |    |    |    |   |   |    |    |    |   |   |    |   |    |   |    |    |   |   |   |   |
| Otu1713                                                                                                                                                                                                        | 0 | 0 | 151 | 0 | 0 | 0  | 106 | 0 | 32 | 0  | 0  | 0 | 0 | 0  | 0  | 0  | 0 | 0 | 0  | 0 | 0  | 0 | 0  | 0  | 0 | 0 | 0 |   |
|                                                                                                                                                                                                                | 0 | 0 | 0   | 0 | 0 | 0  | 0   | 0 | 0  | 0  | 0  | 0 | 0 | 0  | 0  | 0  | 0 | 0 | 0  | 0 | 0  | 0 | 0  | 0  | 0 | 0 | 0 |   |
|                                                                                                                                                                                                                | 0 | 0 | 0   | 0 | 0 | 0  | 0   | 0 | 0  | 0  | 0  | 0 | 0 | 0  | 0  | 0  | 0 | 0 | 0  | 0 | 0  | 0 | 0  | 0  | 0 | 0 | 0 |   |
|                                                                                                                                                                                                                | 0 | 0 | 0   | 0 | 4 | 0  | 0   | 0 | 0  | 0  | 19 | 0 | 0 | 1  | 0  | 0  | 0 | 0 | 0  | 0 | 0  | 0 | 9  | 28 | 0 | 0 | 0 |   |
|                                                                                                                                                                                                                |   |   |     |   |   |    |     |   |    |    |    |   |   |    |    |    |   |   |    |   |    |   |    |    |   |   |   |   |



|                                                                                                                                                                                                                            |   |    |    |    |   |    |   |   |   |   |   |   |   |   |   |   |    |    |   |   |   |   |   |   |   |   |   |
|----------------------------------------------------------------------------------------------------------------------------------------------------------------------------------------------------------------------------|---|----|----|----|---|----|---|---|---|---|---|---|---|---|---|---|----|----|---|---|---|---|---|---|---|---|---|
| Otu1715                                                                                                                                                                                                                    | 0 | 0  | 24 | 0  | 0 | 0  | 0 | 0 | 0 | 0 | 0 | 0 | 0 | 0 | 0 | 0 | 0  | 0  | 0 | 0 | 0 | 0 | 0 | 0 | 0 | 0 | 0 |
|                                                                                                                                                                                                                            | 0 | 0  | 0  | 0  | 0 | 0  | 0 | 0 | 0 | 0 | 0 | 0 | 0 | 0 | 0 | 0 | 0  | 0  | 0 | 0 | 0 | 0 | 0 | 0 | 0 | 0 |   |
|                                                                                                                                                                                                                            | 0 | 0  | 0  | 0  | 0 | 0  | 0 | 0 | 0 | 0 | 0 | 0 | 0 | 0 | 0 | 0 | 0  | 0  | 0 | 0 | 0 | 0 | 0 | 0 | 0 | 0 |   |
|                                                                                                                                                                                                                            | 0 | 0  | 0  | 0  | 0 | 0  | 0 | 0 | 0 | 0 | 0 | 0 | 0 | 0 | 0 | 0 | 0  | 0  | 0 | 0 | 0 | 0 | 0 | 0 | 0 |   |   |
| M02255_76_000000000-ADUNE_1_1111_15137_10294                                                                                                                                                                               |   |    |    |    |   |    |   |   |   |   |   |   |   |   |   |   |    |    |   |   |   |   |   |   |   |   |   |
| .....AC---T-AC-GT-----GCC-A-G-----C--A--G---C--CG-C-GGT-AA-----TA-C--G-T--AG-GT-----GG--C-----AA-GC-GT-TA-----T-C-----C-G-----G--A-AC-T-A-A-----                                                                           |   |    |    |    |   |    |   |   |   |   |   |   |   |   |   |   |    |    |   |   |   |   |   |   |   |   |   |
| GG---G-T-C-T-----G-T-G--G-TG--A-AA-GA--T-C-GA-A-G-----CT-T-AA-----C-T-T-C-G-G-T--A-----A-G--C-C---A-T-----G--GA-A-A--C-----C-G-T--AG--A-G-C---T-A-G-A-G-T--G---T-GT-----GA-G-A-----G-G-A-T--CG-T-----GG--A--ATT---C-C-A-   |   |    |    |    |   |    |   |   |   |   |   |   |   |   |   |   |    |    |   |   |   |   |   |   |   |   |   |
| T-GT--GT-A-G-CG-GT--G---A--A-A---TG-C-GT-AG--AT-A-TA--T-G--G-A-G-G-A-AC-A-CC--AG--T--G--GC-GAA-G--G-C-G-----A--C-G-A-T---CTG--G--CG-C-A-----T-A---A-C-T--GA--CG-C-T-C--A-GT--C-C-CG-A--AA-G-C---G-TG--GG-G--AG-            |   |    |    |    |   |    |   |   |   |   |   |   |   |   |   |   |    |    |   |   |   |   |   |   |   |   |   |
| C-A-AA-----TA--GG                                                                                                                                                                                                          |   |    |    |    |   |    |   |   |   |   |   |   |   |   |   |   |    |    |   |   |   |   |   |   |   |   |   |
| Bacteria(100);Firmicutes(100);Erysipelotrichi(100);Erysipelotrichales(100);Erysipelotrichaceae(100);unclassified(100);unclassified(100);unclassified(100);unclassified(100);                                               |   |    |    |    |   |    |   |   |   |   |   |   |   |   |   |   |    |    |   |   |   |   |   |   |   |   |   |
| Otu1716                                                                                                                                                                                                                    | 0 | 39 | 0  | 0  | 0 | 0  | 0 | 0 | 0 | 0 | 0 | 0 | 0 | 0 | 0 | 0 | 0  | 0  | 0 | 0 | 0 | 0 | 0 | 0 | 0 | 0 |   |
|                                                                                                                                                                                                                            | 0 | 0  | 0  | 0  | 0 | 0  | 0 | 0 | 0 | 0 | 0 | 0 | 0 | 0 | 0 | 0 | 0  | 0  | 0 | 0 | 0 | 0 | 0 | 0 | 0 | 0 |   |
|                                                                                                                                                                                                                            | 0 | 0  | 0  | 0  | 0 | 0  | 0 | 0 | 0 | 0 | 0 | 0 | 0 | 0 | 0 | 0 | 0  | 0  | 0 | 0 | 0 | 0 | 0 | 0 | 0 | 0 |   |
|                                                                                                                                                                                                                            | 0 | 0  | 0  | 0  | 0 | 0  | 0 | 0 | 0 | 0 | 0 | 0 | 0 | 0 | 0 | 0 | 0  | 0  | 0 | 0 | 0 | 0 | 0 | 0 | 0 |   |   |
| M02255_77_000000000-ADUT3_1_1104_5655_18482                                                                                                                                                                                |   |    |    |    |   |    |   |   |   |   |   |   |   |   |   |   |    |    |   |   |   |   |   |   |   |   |   |
| T---AC---GT-AG-GGA-----GCG-A-G-----C--G--T---T--AT-C-CGG-AT-----TC-A--T-T--GG-GC-----GT--A-----AA-GA-GC-GC-----G-TA-G-G-C-G-----G--C-CT-C-T-C-----AA-                                                                      |   |    |    |    |   |    |   |   |   |   |   |   |   |   |   |   |    |    |   |   |   |   |   |   |   |   |   |
| ---G-C-G-G-----G-A-T--C--TC--T-AA-TC--C-G-AG-G-G-----CT-C-AA-----C-C-C-C-C-G-G--C-----C-G--G-A---T--C-----C--CG-A-A--C-----T--G-G--GA--G-G-C---T-C-G-A-G-T--T---C-GG---TA-G-A-----G-G-C-A---GG-C-----GG--A--ATT---C-C-C-G- |   |    |    |    |   |    |   |   |   |   |   |   |   |   |   |   |    |    |   |   |   |   |   |   |   |   |   |
| GT--GT-A-G-CG-GT--G---G--A-A---TG-C-GC-AG--AT-A-TC--G-G--G-A-A-G-A-AC-A-CC--GA--T--G--GC-GAA-G--G-C-A-----G--C-C-T-G---CTG--G--GC-C-G-----C-A---A-C-T--GA--CG-C-T-G--A-GG--C-G-CG-A--AA-G-C---T-AG--GG-G--AG-              |   |    |    |    |   |    |   |   |   |   |   |   |   |   |   |   |    |    |   |   |   |   |   |   |   |   |   |
| C-G-AA-----CA--GG                                                                                                                                                                                                          |   |    |    |    |   |    |   |   |   |   |   |   |   |   |   |   |    |    |   |   |   |   |   |   |   |   |   |
| Bacteria(100);Actinobacteria(100);Actinobacteria(100);Coriobacteridae(100);Coriobacteriales(100);Coriobacterineae(100);Coriobacteriaceae(100);Eggerthella(100);unclassified(100);                                          |   |    |    |    |   |    |   |   |   |   |   |   |   |   |   |   |    |    |   |   |   |   |   |   |   |   |   |
| Otu1717                                                                                                                                                                                                                    | 0 | 0  | 0  | 0  | 0 | 30 | 0 | 0 | 0 | 0 | 0 | 0 | 0 | 0 | 0 | 0 | 0  | 0  | 0 | 0 | 0 | 0 | 0 | 0 | 0 | 0 |   |
|                                                                                                                                                                                                                            | 0 | 0  | 0  | 0  | 0 | 0  | 0 | 0 | 0 | 0 | 0 | 0 | 0 | 0 | 0 | 0 | 0  | 0  | 0 | 0 | 0 | 0 | 0 | 0 | 0 | 0 |   |
|                                                                                                                                                                                                                            | 0 | 0  | 0  | 0  | 0 | 0  | 0 | 0 | 0 | 0 | 0 | 0 | 0 | 0 | 0 | 0 | 0  | 0  | 0 | 0 | 0 | 0 | 0 | 0 | 0 | 0 |   |
|                                                                                                                                                                                                                            | 0 | 0  | 0  | 0  | 0 | 0  | 0 | 0 | 0 | 0 | 0 | 0 | 0 | 0 | 0 | 0 | 0  | 0  | 0 | 0 | 0 | 0 | 0 | 0 | 0 |   |   |
| M02255_77_000000000-ADUT3_1_2116_18764_12619                                                                                                                                                                               |   |    |    |    |   |    |   |   |   |   |   |   |   |   |   |   |    |    |   |   |   |   |   |   |   |   |   |
| G---AC---GT-AG-GAA-----GCA-A-G-----C--G--T---T--GC-C-CGG-AA-----TT-A--C-T--GG-GC-----GT--A-----AA-GA-GC-TC-----G-TA-G-G-C-G-----G--G-GG-C-G-T---                                                                           |   |    |    |    |   |    |   |   |   |   |   |   |   |   |   |   |    |    |   |   |   |   |   |   |   |   |   |
| -----GC---G-T-C-C-----G-A-A--A--GG--A-AA-TC--T-C-AA-G-G-----CT-C-AA-----C-C-T-T-G-G-G--G-C---T-T-T--T---C-----G--GA-T-A--C-----G--G-C--GC--T-T-C---T-T-G-A-G-G--G---T-GA---GA-G-A-----G-G-A-A--AG-C-----GG--A--ATT---      |   |    |    |    |   |    |   |   |   |   |   |   |   |   |   |   |    |    |   |   |   |   |   |   |   |   |   |
| C-C-A-G-GT--GT-A-G-CG-GT--G---A--A-A---TG-C-GT-AG--AT-A-TC--T-G--G-A-G-G-A-AC-A-CC--AG--C--G--GC-GAA-G--G-C-G-----G--C-T-T-T---CTG--G--CT-C-A-----T-T---C-C-T--GA--CG-C-T-G--A-GG--A-G-CG-A--AA-G-C---G-TG--GG-            |   |    |    |    |   |    |   |   |   |   |   |   |   |   |   |   |    |    |   |   |   |   |   |   |   |   |   |
| T--AG-C-G-AA-----CG--GG                                                                                                                                                                                                    |   |    |    |    |   |    |   |   |   |   |   |   |   |   |   |   |    |    |   |   |   |   |   |   |   |   |   |
| Bacteria(100);unclassified(100);unclassified(100);unclassified(100);unclassified(100);unclassified(100);unclassified(100);unclassified(100);unclassified(100);                                                             |   |    |    |    |   |    |   |   |   |   |   |   |   |   |   |   |    |    |   |   |   |   |   |   |   |   |   |
| Otu1718                                                                                                                                                                                                                    | 0 | 0  | 0  | 0  | 0 | 0  | 0 | 0 | 0 | 0 | 0 | 0 | 0 | 0 | 0 | 0 | 0  | 0  | 0 | 0 | 0 | 0 | 0 | 0 | 0 | 0 |   |
|                                                                                                                                                                                                                            | 0 | 0  | 0  | 0  | 0 | 0  | 0 | 0 | 3 | 0 | 0 | 0 | 0 | 0 | 0 | 0 | 0  | 0  | 0 | 0 | 0 | 0 | 0 | 0 | 0 | 0 |   |
|                                                                                                                                                                                                                            | 0 | 1  | 0  | 0  | 0 | 0  | 1 | 0 | 0 | 0 | 0 | 0 | 0 | 0 | 0 | 0 | 0  | 0  | 0 | 0 | 0 | 0 | 0 | 0 | 0 | 1 |   |
|                                                                                                                                                                                                                            | 0 | 0  | 1  | 0  | 0 | 0  | 0 | 0 | 1 | 0 | 0 | 0 | 0 | 0 | 0 | 0 | 0  | 0  | 0 | 0 | 0 | 0 | 0 | 0 | 9 |   |   |
| M02255_77_000000000-ADUT3_1_1110_4777_8912                                                                                                                                                                                 |   |    |    |    |   |    |   |   |   |   |   |   |   |   |   |   |    |    |   |   |   |   |   |   |   |   |   |
| T---AC---GG-AG-GAT-----GCG-A-G-----C--G--T---T--AT-C-CGG-AT-----TT-A-----TT-----G-G--G-----G-TA-G-G-C-G-----G--C-CT-G-T-T-----AA---G-T-                                                                                    |   |    |    |    |   |    |   |   |   |   |   |   |   |   |   |   |    |    |   |   |   |   |   |   |   |   |   |
| C-A-----G-C-G--G--TG--A-AA-TC--T-A-GG-A-G-----CT-T-AA-----C-T-C-C-T-A-A--A-T---T-G--C-C---A-T-----T--GA-T-A--C-----T--G-G--CG--G-G-C---T-T-G-A-G-T--G---T-AG---AT-G-A-----G-G-T-A---GG-C-----GG--A--ATG---C-G-T-G-GT--GT-  |   |    |    |    |   |    |   |   |   |   |   |   |   |   |   |   |    |    |   |   |   |   |   |   |   |   |   |
| A-G-CG-GT--G---G--A-A---TG-C-AT-AG--AT-A-TC--A-C--G-C-A-G-A-AC-T-CC--GA--T--T--GC-GAA-G--G-C-A-----G--C-T-T-A---CTA--A--GG-T-A-----C-A---A-C-T--GA--CG-C-T-G--A-AG--C-A-CG-A--AA-G-C---G-TG--GG-T--AT-C-A-AA-----          |   |    |    |    |   |    |   |   |   |   |   |   |   |   |   |   |    |    |   |   |   |   |   |   |   |   |   |
| ---CA--GG                                                                                                                                                                                                                  |   |    |    |    |   |    |   |   |   |   |   |   |   |   |   |   |    |    |   |   |   |   |   |   |   |   |   |
| Bacteria(100);Bacteroidetes(100);Bacteroidia(100);Bacteroidales(100);Porphyromonadaceae(100);Porphyromonas(100);unclassified(100);unclassified(100);unclassified(100);                                                     |   |    |    |    |   |    |   |   |   |   |   |   |   |   |   |   |    |    |   |   |   |   |   |   |   |   |   |
| Otu1719                                                                                                                                                                                                                    | 0 | 2  | 0  | 0  | 0 | 0  | 0 | 0 | 0 | 0 | 0 | 0 | 0 | 0 | 0 | 0 | 0  | 0  | 0 | 0 | 0 | 0 | 0 | 0 | 0 | 0 |   |
|                                                                                                                                                                                                                            | 0 | 0  | 0  | 0  | 0 | 0  | 0 | 0 | 0 | 0 | 0 | 0 | 0 | 0 | 0 | 0 | 0  | 0  | 0 | 0 | 0 | 0 | 0 | 2 | 0 | 0 |   |
|                                                                                                                                                                                                                            | 0 | 0  | 0  | 0  | 0 | 7  | 0 | 0 | 0 | 0 | 2 | 0 | 0 | 0 | 0 | 0 | 30 | 16 | 6 | 0 | 0 | 0 | 0 | 0 | 0 | 0 |   |
|                                                                                                                                                                                                                            | 0 | 0  | 0  | 17 | 0 | 0  | 0 | 0 | 0 | 0 | 0 | 0 | 0 | 0 | 3 | 0 | 1  | 3  | 0 | 0 | 0 | 0 | 0 | 0 | 0 |   |   |
| M02255_77_000000000-ADUT3_1_2108_15526_12638                                                                                                                                                                               |   |    |    |    |   |    |   |   |   |   |   |   |   |   |   |   |    |    |   |   |   |   |   |   |   |   |   |
| T---AA---GC-AC-CGG-----CTA-A-C-----T--A--C---G--TG-C-CAG-CA-----GC-C--G-C--GG-TA-----AT--A-----CG-TA-GG-GT-----G-CA-A-G-C-G-----T-TAATC-G-G-A---                                                                           |   |    |    |    |   |    |   |   |   |   |   |   |   |   |   |   |    |    |   |   |   |   |   |   |   |   |   |
| -----AT---T-A-C-T-----G-A-T--G--TG--A-AA-TC--C-C-CG-G-G-----CT-T-AA-----C-C-T-G-G-G-A--A-C---T-G--C-A---T---T-----T--GT-G-A--C-----T--G-G--CG--G-G-C---T-A-G-A-G-T--A---T-GG---CA-G-A-----G-G-G-G---GG-T-----AG--A--ATT--- |   |    |    |    |   |    |   |   |   |   |   |   |   |   |   |   |    |    |   |   |   |   |   |   |   |   |   |
| C-C-A-C-GT--GT-A-G-CA-GT--G---A--A-A---TG-C-GT-AG--AG-A-TG--T-G--G-A-G-G-A-AT-A-CC--GA--T--G--GC-GAA-G--G-C-A-----G--C-C-C-C---CTG--G--GC-C-A-----A-T---A-C-T--GA--CG-C-T-C--A-TG--C-A-CG-A--AA-G-C---G-TG--GG-            |   |    |    |    |   |    |   |   |   |   |   |   |   |   |   |   |    |    |   |   |   |   |   |   |   |   |   |
| G--AG-C-A-AA-----CA--GG                                                                                                                                                                                                    |   |    |    |    |   |    |   |   |   |   |   |   |   |   |   |   |    |    |   |   |   |   |   |   |   |   |   |
| Bacteria(100);Proteobacteria(100);Betaproteobacteria(100);unclassified(100);unclassified(100);unclassified(100);unclassified(100);unclassified(100);unclassified(100);                                                     |   |    |    |    |   |    |   |   |   |   |   |   |   |   |   |   |    |    |   |   |   |   |   |   |   |   |   |



|                                                                                                                                                                                                                                                                                                                                                                                                                                                                                                                                                                                                                                                                                                                                                                                                                                                           |   |    |    |   |    |   |   |    |   |   |    |   |    |   |   |   |    |   |   |     |   |   |    |   |     |   |    |   |
|-----------------------------------------------------------------------------------------------------------------------------------------------------------------------------------------------------------------------------------------------------------------------------------------------------------------------------------------------------------------------------------------------------------------------------------------------------------------------------------------------------------------------------------------------------------------------------------------------------------------------------------------------------------------------------------------------------------------------------------------------------------------------------------------------------------------------------------------------------------|---|----|----|---|----|---|---|----|---|---|----|---|----|---|---|---|----|---|---|-----|---|---|----|---|-----|---|----|---|
| Otu1720                                                                                                                                                                                                                                                                                                                                                                                                                                                                                                                                                                                                                                                                                                                                                                                                                                                   | 0 | 0  | 0  | 0 | 0  | 0 | 0 | 0  | 0 | 0 | 0  | 0 | 1  | 0 | 0 | 0 | 0  | 0 | 0 | 0   | 0 | 0 | 0  | 0 | 0   | 0 | 0  |   |
|                                                                                                                                                                                                                                                                                                                                                                                                                                                                                                                                                                                                                                                                                                                                                                                                                                                           | 0 | 0  | 0  | 0 | 0  | 0 | 0 | 0  | 0 | 0 | 0  | 0 | 0  | 0 | 0 | 0 | 0  | 0 | 0 | 0   | 0 | 0 | 27 | 0 | 0   | 0 | 0  |   |
|                                                                                                                                                                                                                                                                                                                                                                                                                                                                                                                                                                                                                                                                                                                                                                                                                                                           | 0 | 0  | 0  | 0 | 0  | 0 | 0 | 0  | 0 | 0 | 0  | 0 | 0  | 0 | 0 | 0 | 0  | 0 | 0 | 0   | 0 | 0 | 0  | 0 | 0   | 0 | 0  |   |
|                                                                                                                                                                                                                                                                                                                                                                                                                                                                                                                                                                                                                                                                                                                                                                                                                                                           | 0 | 0  | 0  | 0 | 0  | 0 | 0 | 0  | 0 | 0 | 0  | 0 | 0  | 0 | 0 | 0 | 0  | 0 | 0 | 0   | 0 | 0 | 0  | 0 | 0   |   |    |   |
| M02255_77_000000000-ADUT3_1_1109_24272_9536 T---AC---GT-AG-GCA-----GCG-A-G-----C--G--T---T--GT-T-CGG-AG-----TT-A--C-T--GG-GC-----GT--A----AA-GA-GT-GC-----G-TA-G-G-C-G-----G--T-GT-T-C-C-----AA-<br>---G-T-C-T-----G-T-T-G--TG--A-AA-TC--T-C-CC-G-G-----CT-T-AA-----C-T-G-G-G-A-G--G-G---T-G--C-G---G--C-----G--GA-A-A--C-----T--G-G-AA--T-G-C---T-G-G-A-G-T--G---T-GG----GA-G-A-----G-G-T-A--AG-C-----GG--A--ATT---C-C-C-G-<br>GT--GT-A-G-CG-GT--G---A--A-A--TG-C-GT-AG--AT-A-TC--G-G--G-A-G-G-A-AC-A-CC--TG--C--G--GT-GTA-G--A-C--G-----G--C-T-T-A--CTG--G--AC-C-A-----T-A--A-C-T--GA--CG-C-T-G--A-GG--C-A-CG-A-AA-G-C---G-TG--GG-T--AG-C-<br>A-AA-----CA--GG Bacteria(100);unclassified(100);unclassified(100);unclassified(100);unclassified(100);unclassified(100);unclassified(100);unclassified(100);unclassified(100);                            |   |    |    |   |    |   |   |    |   |   |    |   |    |   |   |   |    |   |   |     |   |   |    |   |     |   |    |   |
| Otu1721                                                                                                                                                                                                                                                                                                                                                                                                                                                                                                                                                                                                                                                                                                                                                                                                                                                   | 0 | 0  | 0  | 0 | 0  | 0 | 0 | 0  | 0 | 0 | 0  | 0 | 3  | 0 | 0 | 0 | 0  | 0 | 0 | 0   | 0 | 0 | 0  | 0 | 0   | 0 | 0  |   |
|                                                                                                                                                                                                                                                                                                                                                                                                                                                                                                                                                                                                                                                                                                                                                                                                                                                           | 0 | 0  | 0  | 0 | 0  | 0 | 0 | 0  | 0 | 0 | 0  | 0 | 0  | 0 | 0 | 0 | 0  | 0 | 0 | 0   | 0 | 0 | 0  | 0 | 0   | 0 | 0  |   |
|                                                                                                                                                                                                                                                                                                                                                                                                                                                                                                                                                                                                                                                                                                                                                                                                                                                           | 0 | 0  | 0  | 0 | 0  | 0 | 0 | 0  | 0 | 0 | 0  | 0 | 0  | 0 | 0 | 0 | 0  | 0 | 0 | 0   | 0 | 0 | 0  | 0 | 0   | 0 | 0  |   |
|                                                                                                                                                                                                                                                                                                                                                                                                                                                                                                                                                                                                                                                                                                                                                                                                                                                           | 0 | 0  | 0  | 0 | 0  | 0 | 0 | 0  | 0 | 0 | 0  | 0 | 0  | 0 | 0 | 0 | 0  | 0 | 0 | 0   | 0 | 0 | 0  | 0 | 0   | 0 | 0  |   |
| M02255_76_000000000-ADUNE_1_2115_23858_6147 G---AC---AG-AA-TAA-----GCA-C-C-----G--G--C--T--AA--C-T-CT-----GT-G--C-C--AG-CA-----GC--C---GC-G--GT-AA-----T-AC-A-G-A-G-----G--G-TG-C-A-A-----GC---<br>-G-T-T-G-----A-A-T--C--GG--A-AA-TC--C-C-CG-G-G-----CT-C-AA-----C-C-T-G-G-G-A-A-C---G-G--C-A--T--C-----C--AA-A-A--C-----T--G-G--CA--A-G-C---T-A-G-A-G-T-A--T-GG----TA-G-A-----G-G-G-T--AG-T-----GG--A--ATT---T-C-C-T-<br>GT--GT-A-G-CG-GT--G---A--A-A--TG-C-GT-AG--AT-A-TA-G-G--A-A-G-G-A-AC-A-CC--AG--T--G--GC-GAA-G--G-C--G-----A--C-T-A-C--CTG--G--AC-T-G-----A-T--A-C-T--GA--CA-C-T-G--A-GG--T-G-CG-A-AA-G-C---G-TG--GG-G--AG-<br>C-A-AA-----CA--GG Bacteria(100);Proteobacteria(100);Gammaproteobacteria(100);unclassified(100);unclassified(100);unclassified(100);unclassified(100);unclassified(100);unclassified(100);                         |   |    |    |   |    |   |   |    |   |   |    |   |    |   |   |   |    |   |   |     |   |   |    |   |     |   |    |   |
| Otu1722                                                                                                                                                                                                                                                                                                                                                                                                                                                                                                                                                                                                                                                                                                                                                                                                                                                   | 0 | 0  | 0  | 0 | 0  | 0 | 0 | 0  | 0 | 0 | 19 | 0 | 0  | 0 | 0 | 0 | 0  | 0 | 0 | 0   | 0 | 0 | 0  | 0 | 0   | 0 | 0  |   |
|                                                                                                                                                                                                                                                                                                                                                                                                                                                                                                                                                                                                                                                                                                                                                                                                                                                           | 0 | 0  | 0  | 0 | 0  | 0 | 0 | 0  | 0 | 0 | 0  | 0 | 0  | 0 | 0 | 0 | 0  | 0 | 0 | 0   | 0 | 0 | 0  | 0 | 0   | 0 | 0  |   |
|                                                                                                                                                                                                                                                                                                                                                                                                                                                                                                                                                                                                                                                                                                                                                                                                                                                           | 0 | 0  | 0  | 0 | 0  | 0 | 0 | 0  | 0 | 0 | 0  | 0 | 0  | 0 | 0 | 0 | 0  | 0 | 0 | 0   | 0 | 0 | 0  | 0 | 0   | 0 | 0  |   |
|                                                                                                                                                                                                                                                                                                                                                                                                                                                                                                                                                                                                                                                                                                                                                                                                                                                           | 0 | 0  | 0  | 0 | 0  | 0 | 0 | 0  | 0 | 0 | 0  | 0 | 0  | 0 | 0 | 0 | 0  | 0 | 0 | 0   | 0 | 0 | 0  | 0 | 0   |   |    |   |
| M02255_76_000000000-ADUNE_1_1116_26202_13343 .....AC---T-AC-GT-----GCC-A-G-----C--A--G---C--CG-C-GGT-AA-----TA-C--G-T--AG-GT-----GG--C---AA-GC-G--TT-----G---T-C-C-G-----G--T-TC-T-T-T-----<br>AA---G-T-C-T-----G-A-T--G--TG--A-AA-GC--C-C-CC-G-G-----CT-C-AA-----C-C-G-G-G-G-A-G-----G-GT-C-A--T--T-----G--GA-A-A--C-----T--G-G--AG--A-A-C---T-T-G-A-G-T-G---C-AG----AA-G-A-----G-G-A-G--AG-T-----GG--A--ATT---C-C-<br>A-C-GT--GT-A-G-CG-GT--G---A--A-A--TG-C-GT-AG--AG-A-TC--T-G--G-A-G-G-A-AT-A-CC--GA--T--G--GC-GAA-G--G-C--A-----G--C-C-T-T--CTG--G--CA-T-A-----A-T--A-C-T--GA--CA-C-T-G--A-GG--C-T-CG-A-AA-G-C---G-TG--GG-T--<br>AG-C-A-AA-----CA--GG Bacteria(100);Firmicutes(100);Bacilli(100);unclassified(100);unclassified(100);unclassified(100);unclassified(100);unclassified(100);unclassified(100);                                       |   |    |    |   |    |   |   |    |   |   |    |   |    |   |   |   |    |   |   |     |   |   |    |   |     |   |    |   |
| Otu1723                                                                                                                                                                                                                                                                                                                                                                                                                                                                                                                                                                                                                                                                                                                                                                                                                                                   | 0 | 59 | 32 | 0 | 59 | 0 | 0 | 0  | 0 | 0 | 0  | 0 | 0  | 0 | 0 | 0 | 3  | 0 | 0 | 0   | 0 | 0 | 0  | 0 | 0   | 1 | 1  | 1 |
|                                                                                                                                                                                                                                                                                                                                                                                                                                                                                                                                                                                                                                                                                                                                                                                                                                                           | 3 | 0  | 0  | 0 | 0  | 7 | 0 | 33 | 0 | 0 | 0  | 0 | 0  | 0 | 0 | 0 | 0  | 0 | 0 | 0   | 0 | 0 | 22 | 0 | 0   | 0 | 0  |   |
|                                                                                                                                                                                                                                                                                                                                                                                                                                                                                                                                                                                                                                                                                                                                                                                                                                                           | 0 | 0  | 0  | 0 | 0  | 0 | 0 | 0  | 0 | 0 | 0  | 0 | 0  | 0 | 0 | 0 | 12 | 0 | 0 | 0   | 0 | 0 | 0  | 0 | 0   | 0 | 49 |   |
|                                                                                                                                                                                                                                                                                                                                                                                                                                                                                                                                                                                                                                                                                                                                                                                                                                                           | 0 | 0  | 9  | 7 | 50 | 0 | 0 | 0  | 0 | 0 | 0  | 0 | 34 | 0 | 9 | 0 | 27 | 7 | 0 | 212 | 4 | 0 | 0  | 3 | 107 | 0 |    |   |
| M02255_77_000000000-ADUT3_1_1101_15813_11092 T---AC---GT-AG-GGT-----ACA-A-G-----C--G--T---T--GT-C-CGG-AA-----TT-A--T-T--GG-GC-----GT--A----AA-GA-GC-TC-----G-TA-G-G-T-G-----G--T-CT-G-T-C-----<br>----AC---G-T-C-T-----G-C-T--G--TG--G-AA-AC--G-C-AA-G-G-----CT-C-AA-----C-C-T-T-G-C-G--C-G---T-G--C-A--G--T-----G--GG-T-A--C-----G--G-G--CG--G-A-C---T-A-G-A-G-T-G---C-AG----TA-G-G-----G-G-A-G---TC-T-----GG--A--ATT---C-C-<br>C-T-G-GT--GT-A-G-CG-GT--G---A--A-A--TG-C-GC-AG--AT-A-TC--A-G--G-A-G-G-A-AC-A-CC--GG--T--G--GC-GAA-G--G-C--G-----G--G-A-C-T--CTG--G--GC-T-G-----T-A--A-C-T--GA--CG-C-T-G--A-GG--A-G-CG-A-AA-G-C---A-TG--GG-<br>G--AG-C-G-AA-----CA--GG Bacteria(100);Actinobacteria(100);Actinobacteria(100);Actinobacteridae(100);Actinomycetales(100);Micrococcineae(100);Brevibacteriaceae(100);Brevibacterium(100);unclassified(100); |   |    |    |   |    |   |   |    |   |   |    |   |    |   |   |   |    |   |   |     |   |   |    |   |     |   |    |   |
| Otu1724                                                                                                                                                                                                                                                                                                                                                                                                                                                                                                                                                                                                                                                                                                                                                                                                                                                   | 0 | 27 | 0  | 0 | 0  | 0 | 0 | 0  | 0 | 0 | 0  | 0 | 0  | 0 | 0 | 0 | 0  | 0 | 0 | 0   | 0 | 0 | 0  | 0 | 0   | 0 | 0  |   |
|                                                                                                                                                                                                                                                                                                                                                                                                                                                                                                                                                                                                                                                                                                                                                                                                                                                           | 0 | 0  | 0  | 0 | 0  | 0 | 0 | 0  | 0 | 0 | 0  | 0 | 0  | 0 | 0 | 0 | 0  | 0 | 0 | 0   | 0 | 0 | 0  | 0 | 0   | 0 | 0  |   |
|                                                                                                                                                                                                                                                                                                                                                                                                                                                                                                                                                                                                                                                                                                                                                                                                                                                           | 0 | 0  | 0  | 0 | 0  | 0 | 0 | 0  | 0 | 0 | 0  | 0 | 0  | 0 | 0 | 0 | 0  | 0 | 0 | 0   | 0 | 0 | 0  | 0 | 0   | 0 | 0  |   |
|                                                                                                                                                                                                                                                                                                                                                                                                                                                                                                                                                                                                                                                                                                                                                                                                                                                           | 0 | 0  | 0  | 0 | 0  | 0 | 0 | 0  | 0 | 0 | 0  | 0 | 0  | 0 | 0 | 0 | 0  | 0 | 0 | 0   | 0 | 0 | 0  | 0 | 0   |   |    |   |
| M02255_76_000000000-ADUNE_1_1103_23857_13505 .....AC---T-AC-GT-----GCC-A-G-----C--A--G---C--CG-C-GGT-AA-----TA-C--G-T--AG-GG-----GG--C---AA---GC-GT-----TG-T-C-C-G-----G--C-AA-T-A-T-----<br>AA---G-T-C-A-----G-A-T--G--TG--A-AA-GG--T-G-AG-G-G-----CT-C-AA-----C-C-C-T-T-A-G--A-C---T-G--C-A--T--C-----T--GA-T-A--C-----T--G-T--AT--A-G-C---T-T-G-A-G-T-G---T-GA----GA-G-A-----G-G-A-A--AG-C-----GG--A--ATT---C-C-T-<br>A-GT--GT-A-G-CG-GT--G---A--A-A--TG-C-GT-AG--AT-A-TT--A-G--G-A-G-G-A-AC-A-CC--AG--T--G--GC-GAA-G--G-C--G-----G--C-T-T-T--CTG--G--CT-C-A-----T-A--A-C-T--GA--CG-C-T-G--A-GG--C-G-CG-A-AA-G-C---G-TG--GG-G--<br>AG-C-A-AA-----CA--GG Bacteria(100);Firmicutes(100);Clostridia(100);Clostridiales(100);unclassified(100);unclassified(100);unclassified(100);unclassified(100);unclassified(100);                                    |   |    |    |   |    |   |   |    |   |   |    |   |    |   |   |   |    |   |   |     |   |   |    |   |     |   |    |   |



[illegible]



|                                                                                                                                                                                                                                                                                                                                                                                                                                                                                                                                                                                                                                                                                                                                                                                              |   |     |    |   |   |   |   |   |    |   |    |   |   |    |   |   |   |   |   |   |   |   |    |    |    |   |   |
|----------------------------------------------------------------------------------------------------------------------------------------------------------------------------------------------------------------------------------------------------------------------------------------------------------------------------------------------------------------------------------------------------------------------------------------------------------------------------------------------------------------------------------------------------------------------------------------------------------------------------------------------------------------------------------------------------------------------------------------------------------------------------------------------|---|-----|----|---|---|---|---|---|----|---|----|---|---|----|---|---|---|---|---|---|---|---|----|----|----|---|---|
| Otu1730                                                                                                                                                                                                                                                                                                                                                                                                                                                                                                                                                                                                                                                                                                                                                                                      | 0 | 0   | 0  | 0 | 0 | 0 | 0 | 0 | 20 | 0 | 0  | 0 | 0 | 0  | 0 | 0 | 0 | 0 | 0 | 0 | 0 | 0 | 0  | 0  | 0  | 0 | 0 |
|                                                                                                                                                                                                                                                                                                                                                                                                                                                                                                                                                                                                                                                                                                                                                                                              | 0 | 0   | 0  | 0 | 0 | 0 | 0 | 0 | 0  | 0 | 0  | 0 | 0 | 0  | 0 | 0 | 0 | 0 | 0 | 0 | 0 | 0 | 0  | 0  | 0  | 0 |   |
|                                                                                                                                                                                                                                                                                                                                                                                                                                                                                                                                                                                                                                                                                                                                                                                              | 0 | 0   | 0  | 0 | 0 | 0 | 0 | 0 | 0  | 0 | 0  | 0 | 0 | 24 | 0 | 0 | 0 | 0 | 0 | 0 | 0 | 0 | 0  | 0  | 0  | 0 |   |
|                                                                                                                                                                                                                                                                                                                                                                                                                                                                                                                                                                                                                                                                                                                                                                                              | 0 | 0   | 0  | 0 | 0 | 0 | 0 | 0 | 0  | 0 | 0  | 0 | 0 | 0  | 0 | 0 | 0 | 0 | 0 | 0 | 0 | 0 | 0  | 0  | 0  | 0 |   |
| M02255_77_000000000-ADUT3_1_2113_27176_14055 T---AC---GT-AT-GGA-----GCA-A-G-----C-G-T---T--AT-C-CGG-AT-----TT-A-C-T-T-GG-GT-----GT-A-----AA-GG-GA-GT-----G-TA-G-G-C-G-----G-C-AT-G-G-C-----AA-G-T-C-T-----G-A-T-G--TG--A-AA-AT--C-C-GG-G-G-----CT-T-AA-----C-C-C-C-G-G-A-C-C---T-G-C-A--T-T-----G--GA-A-A--C-----T-G-T-CA-G-G-C---T-G-G-A-G-T-G--T-CG-----GA-G-A-----G-G-T-A--AG-T-----GG-A-ATT---C-T-A-GT--GT-A-G-CG-GT--G---A-A-A---TG-C-GT-AG--AT-A-TT--A-G--G-A-G-G-A-AC-A-CC---AG-T-T-G-GC-GAA-G-G-C-G-----G-C-T-T-A---CTG-G--AC-G-A-----C-A--A-C-T-GA-CG-C-T-G--A-GG--C-T-CG-A-AA-G-C--G-TG--GG-G--AG-C-A-AA-----CA--GG Bacteria(100);Firmicutes(100);Clostridia(100);Clostridiales(100);Lachnospiraceae(100);unclassified(100);unclassified(100);unclassified(100);unclassified(100); |   |     |    |   |   |   |   |   |    |   |    |   |   |    |   |   |   |   |   |   |   |   |    |    |    |   |   |
| Otu1731                                                                                                                                                                                                                                                                                                                                                                                                                                                                                                                                                                                                                                                                                                                                                                                      | 0 | 175 | 12 | 0 | 0 | 0 | 0 | 0 | 0  | 0 | 0  | 0 | 0 | 0  | 0 | 0 | 0 | 0 | 0 | 0 | 0 | 0 | 0  | 0  | 0  | 0 |   |
|                                                                                                                                                                                                                                                                                                                                                                                                                                                                                                                                                                                                                                                                                                                                                                                              | 0 | 0   | 0  | 0 | 0 | 0 | 0 | 0 | 0  | 0 | 13 | 0 | 0 | 0  | 0 | 0 | 0 | 0 | 0 | 0 | 0 | 0 | 0  | 0  | 0  | 0 |   |
|                                                                                                                                                                                                                                                                                                                                                                                                                                                                                                                                                                                                                                                                                                                                                                                              | 0 | 0   | 0  | 0 | 0 | 0 | 0 | 0 | 0  | 0 | 0  | 0 | 0 | 0  | 0 | 5 | 0 | 0 | 0 | 0 | 0 | 0 | 0  | 0  | 0  | 0 |   |
|                                                                                                                                                                                                                                                                                                                                                                                                                                                                                                                                                                                                                                                                                                                                                                                              | 0 | 0   | 0  | 0 | 0 | 0 | 0 | 0 | 0  | 0 | 0  | 0 | 0 | 0  | 0 | 0 | 0 | 0 | 0 | 0 | 0 | 0 | 10 | 0  | 0  | 0 |   |
| M02255_76_000000000-ADUNE_1_1106_23211_10947 T---CG---GC-TA-ACT-----CCG-T-GC---C-A-G---C-AG-C-CGC-GG-----TA-A-T-A-CG-GA-----GG-A---TG-CG-AG-CG-----T-TA-T-C-C-G-----GA-T-TT-A-T-T-----AA-G-T-T-A-----G-T-G-G--TT--A-AA-TA--T-T-TG-A-G---CT-A-AA-----C-T-C-A-A-T-T-G-T---G-C-C---A-T-----T-AA-T-A--C-----T-G-G-TA--A-A-C---T-G-G-A-G-T-A--C-AG---AC-G-A-----G-G-T-A--GG-C-----GG-A-ATA---A-G-T-T-AA--GT-A-G-CG-GT--G---A-A-A---TG-C-AT-AG--AT-A-TA-A-C--T-T-A-G-A-AC-T-CC--GA--T-A-GC-GAA-G-G-C-A-----G-C-T-T-A---CCA-G--AC-T-G-----T-A--A-C-T-GA-CG-C-T-G--A-TG--C-A-CG-A-GA-G-C--G-TG--GG-T--AG-C-G-AA-----CA--GG Bacteria(100);Bacteroidetes(100);Bacteroidia(100);Bacteroidales(100);Porphyromonadaceae(100);Odoribacter(100);unclassified(100);unclassified(100);unclassified(100);      |   |     |    |   |   |   |   |   |    |   |    |   |   |    |   |   |   |   |   |   |   |   |    |    |    |   |   |
| Otu1732                                                                                                                                                                                                                                                                                                                                                                                                                                                                                                                                                                                                                                                                                                                                                                                      | 0 | 0   | 0  | 0 | 0 | 0 | 0 | 0 | 1  | 0 | 0  | 0 | 0 | 0  | 0 | 0 | 0 | 0 | 0 | 0 | 0 | 0 | 0  | 0  | 0  | 0 |   |
|                                                                                                                                                                                                                                                                                                                                                                                                                                                                                                                                                                                                                                                                                                                                                                                              | 0 | 0   | 0  | 0 | 0 | 0 | 0 | 0 | 0  | 1 | 0  | 0 | 0 | 0  | 0 | 0 | 0 | 0 | 0 | 0 | 0 | 0 | 0  | 0  | 0  | 0 |   |
|                                                                                                                                                                                                                                                                                                                                                                                                                                                                                                                                                                                                                                                                                                                                                                                              | 0 | 0   | 0  | 0 | 0 | 0 | 0 | 0 | 0  | 0 | 0  | 0 | 0 | 0  | 0 | 1 | 0 | 2 | 0 | 0 | 0 | 0 | 0  | 0  | 0  | 0 |   |
|                                                                                                                                                                                                                                                                                                                                                                                                                                                                                                                                                                                                                                                                                                                                                                                              | 0 | 0   | 0  | 0 | 0 | 0 | 0 | 0 | 0  | 0 | 0  | 0 | 1 | 0  | 0 | 0 | 0 | 0 | 0 | 0 | 0 | 0 | 0  | 0  | 12 | 0 |   |
| M02255_77_000000000-ADUT3_1_1113_2783_16749 T---AC---GG-AA-GGT-----CCA-G-G-----C-G-T---T--AT-C-CGG-AT-----TT-A-----TT-----G-G-G-----G-TA-G-G-C-T-----G-G-AG-A-T-T-----AA-G-T-G-T-----G-T-T-G--TG--A-AA-TG--T-A-GA-C-G-----CT-C-AA-----C-G-T-C-T-G-A-A-T---T-G--C-A--G-C-----G-CA-T-A--C-----T-G-G-TT--T-C-C---T-T-G-A-G-T-A--C-GC---AC-A-A-----C-G-T-T--GG-C-----GG-A-ATT---C-G-T-C-GT--GT-A-G-CG-GT--G---A-A-A---TG-C-TT-AG--AT-A-TG--A-C--G-A-A-G-A-AC-T-CC--GA--T-T-GC-GAA-G-G-C-A-----G-C-T-G-A---CGG-G--AG-C-G-----C-A--A-C-T-GA-CG-C-T-T-A-AG--C-T-CG-A-AG-G-T--G-CG--GG-T--AT-C-A-AA-----CA--GG Bacteria(100);Bacteroidetes(100);Bacteroidia(100);Bacteroidales(100);Prevotellaceae(100);Prevotella(100);unclassified(100);unclassified(100);unclassified(100);                       |   |     |    |   |   |   |   |   |    |   |    |   |   |    |   |   |   |   |   |   |   |   |    |    |    |   |   |
| Otu1733                                                                                                                                                                                                                                                                                                                                                                                                                                                                                                                                                                                                                                                                                                                                                                                      | 0 | 0   | 0  | 0 | 0 | 0 | 0 | 0 | 0  | 0 | 0  | 0 | 0 | 0  | 0 | 0 | 0 | 0 | 0 | 0 | 0 | 9 | 0  | 17 | 0  | 0 |   |
|                                                                                                                                                                                                                                                                                                                                                                                                                                                                                                                                                                                                                                                                                                                                                                                              | 0 | 0   | 0  | 0 | 0 | 0 | 0 | 0 | 0  | 0 | 0  | 0 | 0 | 0  | 0 | 0 | 0 | 0 | 0 | 0 | 0 | 0 | 0  | 0  | 0  | 0 |   |
|                                                                                                                                                                                                                                                                                                                                                                                                                                                                                                                                                                                                                                                                                                                                                                                              | 0 | 0   | 0  | 0 | 0 | 0 | 0 | 0 | 0  | 0 | 0  | 0 | 0 | 0  | 0 | 0 | 0 | 0 | 0 | 0 | 0 | 0 | 0  | 0  | 0  | 0 |   |
|                                                                                                                                                                                                                                                                                                                                                                                                                                                                                                                                                                                                                                                                                                                                                                                              | 0 | 0   | 0  | 0 | 0 | 0 | 0 | 0 | 0  | 0 | 0  | 0 | 0 | 0  | 0 | 0 | 0 | 1 | 0 | 0 | 0 | 0 | 0  | 0  | 0  | 0 |   |
| M02255_77_000000000-ADUT3_1_1115_11748_5697 C---TA---AC-TC-CGT-----GCC-A-G-----C-A-G---C-CG-C-GGT-AA-----TA-C--G-G--AG-GG-----GG-C---GA-GCGTT-AA-----T-CG-G-A-A-T-----T--A-CT-G-T-T-----AA---G-C-A-A-----G-A-T-G--TG--A-AA-GC--C-C-GG-G-G-----CT-C-AA-----C-C-T-C-G-G-A-A-C---A-G-C-A--T-T-----T-TG-A-A--C-----T-G-G-CA-G-A-C---T-A-G-A-G-T-C---T-TG---TA-G-A-----G-G-G-G--GG-T-----AG-A-ATT---T-C-A-G-GT--GT-A-G-CG-GT--G---A-A-A---TG-C-GT-AG--AG-A-TC--T-G--                                                                                                                                                                                                                                                                                                                              |   |     |    |   |   |   |   |   |    |   |    |   |   |    |   |   |   |   |   |   |   |   |    |    |    |   |   |



Otu1735      0      0      0      0      0      0      0      0      1      0      0      0      0      0      0      0      0      0      0      0      0      0      0      0      0      0      0  
             0      0      0      0      0      0      0      0      0      0      0      0      37      0      0      0      0      0      0      0      0      0      0      0      0      0      0  
             0      0      0      0      0      0      0      0      0      0      0      0      0      0      0      0      0      0      0      0      0      0      0      0      0      0      0  
             0      0      0      0      0      0      0      0      0      0      0      0      0      0      0      0      0      0      0      0      0      0      0      0      0      0  
             M02255\_77\_000000000-ADUT3\_1\_1110\_8140\_19981 T---AC---GT-AG-GGC-----GCA-A-G-----C-G--T---T--GT-C-CGG-AA-----TT-A--T-T--GG-GC-----GT--A----AA-GA-GC-TC-----G-TA-G-G-C-G-----G--C-CT-G-T-C-----GC-  
---G-T-C-C-----G-C-T--G--TG--A-AA-TC--C-C-GG-G-G----CT-T-AA-----C-C-C-C-G-G-G-C-C---T-G--C-A--G-T-----G--GA-T-A--C-----G--G-G--CA--G-G-C---T-G-G-A-G-G-C--A-GG----CA-G-G-----G-G-A-G--AA-C-----GG--A--ATT---C-C-C-G-  
GT--GT-A-G-CG-GT--G---A--A-A---TG-C-GC-AG--AT-A-TC--G-G--G-A-G-G-A-AC-A-CC---GG--T--G--GC-GAA-G--G-C-G-----G--T-T-C-T---CTG--G--GC-C-T-----G-T---A-C-T--GA--CG-C-T-G--A-GG--A-G-CG-A--AA-G-C---G-TG--GG-G--AG-  
C-A-AA-----CA--GG      Bacteria(100);Actinobacteria(100);Actinobacteria(100);Actinobacteridae(100);Actinomycetales(100);Frankineae(100);unclassified(100);unclassified(100);unclassified(100);

Otu1736      0      0      0      0      0      0      0      0      1      1      0      0      0      0      0      0      0      0      1      0      0      0      0      0      0      0      0      0  
             0      0      0      0      0      0      0      0      0      0      0      0      0      0      0      0      0      0      0      0      0      0      0      0      0      0      0  
             0      0      0      0      0      0      0      0      0      0      0      0      0      0      0      0      0      0      0      0      0      0      0      0      4      0      0  
             0      0      0      0      0      0      0      0      0      0      0      0      0      0      0      0      0      1      0      0      0      0      0      0      1      1  
             M02255\_77\_000000000-ADUT3\_1\_1109\_9665\_3913    C---TA---AC-TC-CGT-----GCC-A-G-----C-----A--G--CC-G-CGG-TA-----AT-A--C-G--GA-GG-----GTG-C-----AA-GCGTT-AA-----T-CG-G-A-A-T-----T--A-CT-G-T-C-----AA-  
---G-T-C-G-----G-A-T--G--TG--A-AA-TC--C-C-CG-G-G----CT-C-AA-----C-C-T-G-G-G-A-A-C---T-G--C-A--T-T-----C--GA-A-A--C-----T--G-G--CA--G-G-C---T-A-G-A-G-T-C---T-TG---TA-G-A-----G-G-G-G--GG-T----AG--A--ATT---C-C-A-G-  
GT--GT-A-G-CG-GT--G---A--A-A---TG-C-GT-AG--AG-A-TC--T-G--G-A-G-G-A-AT-A-CC---GG--T--G--GC-GAA-G--G-C-G-----G--C-C-C-C---CTG--G--AC-A-A-----A-G---A-C-T--GA--CG-C-T-C--A-GG--T-G-CG-A--AA-G-C---G-TG--GG-G--AG-  
C-A-AA-----CA--GG      Bacteria(100);Proteobacteria(100);Gammaproteobacteria(100);Enterobacteriales(100);Enterobacteriaceae(100);Enteric\_Bacteria\_cluster(100);unclassified(100);unclassified(100);unclassified(100);

Otu1737      0      0      1      0      0      0      0      0      0      0      0      0      0      0      0      0      0      0      0      0      0      0      0      0      0      0      0  
             0      0      0      0      0      0      0      0      0      0      0      0      0      0      0      0      0      0      0      0      0      0      0      0      0      0      0  
             0      0      0      0      0      0      0      0      0      0      0      0      0      0      0      0      0      0      0      0      0      0      0      0      0      0      0  
             0      0      0      0      0      0      0      0      0      0      0      0      0      0      0      0      0      0      49      0      0      0      0      0      0  
             M02255\_76\_000000000-ADUNE\_1\_1115\_9908\_20781 GT---TC---GT-GCCAGC-----AGC-C-G-----C-G--G---T--AA-G-ACG-AA-----CC-G--T-G--CG-AA-----CG--T-----TA-TT-CG-GA-----A-TC-A-C-T-G-----G--G-CG-G-C-C-----  
AC---G-T-C-G-----AGA-G--C--TG--A-AA-TC--C-C-CC-G-G----CT-C-AA-----C-C-G-G-G-G-A-A-G---G-G--G-C--C-T-----C--GA-T-A--C-----G--G-G--TC-G-C-C---T-C-G-A-G-T-G---G-CG---GA-G-G-----G-G-G-A--GC-C-----GG--A--ACT---C-  
A-C-G-GT--GG-A-G-CG-GT--G---A--A-A---TG-C-GT-TG--AG-A-TC--G-T--G-A-G-G-A-AC-G-CC---GA--C--G--GC-GAA-A--G-C-A-----G--G-C-T-C---CTG--G--AC-G-C-----C-G---A-C-T--GA--CG-T-T-G--A-GG--C-G-CG-A--AA-G-C---C-AG--GG-  
G--AG-C-G-AA-----CG--GG      Bacteria(100);Planctomycetes(100);Planctomycetacia(100);Planctomycetales(100);Planctomycetaceae(100);Singulisphaera(100);unclassified(100);unclassified(100);unclassified(100);

Otu1738      0      0      0      0      0      0      0      0      0      5      0      0      0      0      0      0      0      0      0      0      0      0      0      0      0      0      0      0  
             0      0      0      0      0      0      0      0      0      0      0      0      0      0      0      0      0      0      0      0      0      0      0      0      0      0      0  
             0      0      0      0      0      0      0      0      0      0      0      0      0      0      0      0      0      0      0      0      0      0      0      0      0      0      0  
             0      0      0      0      0      0      0      0      0      0      0      0      0      0      0      0      0      0      0      0      0      0      0      0      0      0  
             M02255\_77\_000000000-ADUT3\_1\_2118\_11433\_15471      G---AC---GG-GG-GGG-----GCA-A-G-----T--G--T---T--CT-T-CGG-AA-----TG-A--C-T--AG-GC-----GT--A----AA-GG-GC-AC-----G-GA-G-G-C-G-----G--T-GA-A-T-C---  
-----GG---G-T-T-G-----A-A-A--G--GG--A-AA-GT--C-G-CC---A-----AA-A-AC-----T-G-G-T-G-G-A-A-T---G-C--T-C---T--C-----G---A-A-A--C-----C--A-A--TT--C-A-C---T-T-G-A-G-T-G---A-GA---CA-G-A-----G-G-A-G--AG-T-----GG--A--ATT---  
T-C-G-T-GT--GT-A-G-GG-GT--G---A--A-A---TC-C-GA-AG--AT-C-TA--C-G--A-A-G-G-A-AC-G-CC---AA--A--A--GC-GAA-G--G-C-A-----G--C-T-C-T---CTG--G--GT-C-C-----C-T---A-C-C--GA--CG-C-T-G--G-AG--T-G-CG-A--AA-G-C---A-TG--GG-  
G--AG-C-G-AA-----CG--GG      Bacteria(100);unclassified(100);unclassified(100);unclassified(100);unclassified(100);unclassified(100);unclassified(100);unclassified(100);

Otu1739      0      0      0      0      0      0      19      0      0      0      0      2      0      0      0      0      0      0      0      0      0      0      0      0      0      0      0  
             0      0      0      0      0      0      0      28      0      0      0      0      0      0      0      0      0      0      0      0      0      0      0      0      0      0      0  
             0      0      0      0      0      0      0      0      0      0      0      0      0      0      0      0      0      0      0      0      0      0      0      0      0      0      0  
             0      0      0      0      0      0      0      0      0      0      0      0      0      0      0      0      0      7      0      0      0      0      0      0      0  
             M02255\_77\_000000000-ADUT3\_1\_2117\_26030\_11995      T---AC---GT-AG-GGT-----GCG-A-G-----C-G--T---T--GT-C-CGG-AA-----TT-A--C-T--GG-GC-----GT--A----AA-GA-GC-TC-----G-TA-G-G-C-G-----G--T-TT-G-T-C-----  
----GC---G-T-C-G-----T-C-T--G--TG--A-AA-AC--T-C-GG-A-G-----CT-T-AA-----C-T-C-C-G-G-G-C-G---T-G--C-A--G-G-----C--GA-T-A--C-----G--G-G--CA--G-A-C---T-T-G-A-G-T-A--C-TA---CA-G-G-----G-G-A-G--AC-T-----GG--A--ATT---C-  
C-T-G-GT--GT-A-G-CG-GT--G---A--A-A---TG-C-GC-AG--AT-A-TC--A-G--G-A-G-G-A-AC-A-CC---GG--T--G--GC-GAA-G--G-C-G-----G--G-T-C-T---CTG--G--GT-A-G-----T-A--A-C-T--GA--CG-C-T-G--A-GG--A-G-CG-A--AA-G-C---A-TG--GG-  
T--AG-C-G-AA-----CA--GG      Bacteria(100);Actinobacteria(100);Actinobacteria(100);Actinobacteridae(100);Actinomycetales(100);Corynebacterineae(100);unclassified(100);unclassified(100);unclassified(100);



|                                                                                                                                                                                                                             |   |     |     |    |   |    |     |    |      |   |     |    |   |   |    |    |   |   |   |   |   |   |    |    |     |   |   |   |
|-----------------------------------------------------------------------------------------------------------------------------------------------------------------------------------------------------------------------------|---|-----|-----|----|---|----|-----|----|------|---|-----|----|---|---|----|----|---|---|---|---|---|---|----|----|-----|---|---|---|
| Otu1740                                                                                                                                                                                                                     | 0 | 126 | 58  | 0  | 0 | 0  | 80  | 0  | 66   | 0 | 0   | 0  | 0 | 0 | 0  | 0  | 0 | 0 | 0 | 0 | 0 | 0 | 0  | 9  | 0   | 0 | 0 | 0 |
|                                                                                                                                                                                                                             | 0 | 357 | 0   | 0  | 0 | 0  | 0   | 0  | 0    | 0 | 0   | 0  | 0 | 0 | 0  | 0  | 0 | 0 | 0 | 0 | 0 | 0 | 0  | 0  | 4   | 0 | 0 | 0 |
|                                                                                                                                                                                                                             | 0 | 0   | 0   | 0  | 0 | 0  | 0   | 0  | 0    | 0 | 1   | 0  | 0 | 0 | 0  | 13 | 0 | 0 | 0 | 0 | 0 | 0 | 0  | 0  | 0   | 0 | 0 | 0 |
|                                                                                                                                                                                                                             | 0 | 0   | 0   | 0  | 0 | 18 | 8   | 0  | 0    | 0 | 0   | 90 | 0 | 0 | 0  | 0  | 0 | 0 | 0 | 0 | 0 | 0 | 0  | 26 | 0   | 0 |   |   |
| M02255_77_000000000-ADUT3_1_1101_3174_11382 T---AC---GT-AG-GGG-----GCA-A-G-----C--G--T---T--AT-C-CGG-AT-----TT-A--C-T--GG-GT-----GT--A-----AA-GG-GA-GC-----G-TA-G-A-C-G-----G--C-TG-T-G-C-----                              |   |     |     |    |   |    |     |    |      |   |     |    |   |   |    |    |   |   |   |   |   |   |    |    |     |   |   |   |
| AA---G-T-C-T-----G-A-A--G-TG--A-AA-GG--C-A-TG-G-G-----CT-C-AA-----C-C-T-G-T-G-G--A-C---T-G--C-T---T--T-----G--GA-A-A--C-----T--G-T--GC--A-G-C---T-A-G-A-G-T--G---T-CG----GA-G-A-----G-G-T-A--AG-T-----GG--A--ATT---C-C-T-   |   |     |     |    |   |    |     |    |      |   |     |    |   |   |    |    |   |   |   |   |   |   |    |    |     |   |   |   |
| A-GT--GT-A-G-CG-GT--G---A--A-A---TG-C-GT-AG--AT-A-TT--A-G--G-A-G-G-A-AC-A-CC--AG--T--G--GC-GAA-G--G-C--G-----G--C-T-T-A---CTG--G--AC-G-A-----T-G---A-C-T--GA--CG-T-T-G--A-GG--C-T-CG-A--AA-G-C---G-TG--GG-G--               |   |     |     |    |   |    |     |    |      |   |     |    |   |   |    |    |   |   |   |   |   |   |    |    |     |   |   |   |
| AG-C-A-AA-----CA--GG Bacteria(100);Firmicutes(100);Clostridia(100);Clostridiales(100);Lachnospiraceae(100);Dorea(100);unclassified(100);unclassified(100);unclassified(100);                                                |   |     |     |    |   |    |     |    |      |   |     |    |   |   |    |    |   |   |   |   |   |   |    |    |     |   |   |   |
| Otu1741                                                                                                                                                                                                                     | 0 | 0   | 101 | 0  | 0 | 0  | 0   | 0  | 0    | 0 | 0   | 0  | 0 | 0 | 0  | 0  | 0 | 0 | 0 | 0 | 0 | 0 | 0  | 0  | 0   | 0 | 0 | 0 |
|                                                                                                                                                                                                                             | 0 | 0   | 0   | 0  | 0 | 0  | 0   | 0  | 0    | 0 | 0   | 0  | 0 | 0 | 0  | 0  | 0 | 0 | 0 | 0 | 0 | 0 | 0  | 0  | 0   | 0 | 0 | 0 |
|                                                                                                                                                                                                                             | 0 | 0   | 0   | 7  | 0 | 0  | 0   | 0  | 0    | 0 | 0   | 0  | 0 | 0 | 0  | 0  | 0 | 0 | 0 | 0 | 0 | 0 | 0  | 0  | 0   | 0 | 0 | 1 |
|                                                                                                                                                                                                                             | 0 | 0   | 0   | 0  | 0 | 0  | 0   | 0  | 0    | 0 | 0   | 0  | 0 | 0 | 0  | 0  | 0 | 0 | 0 | 0 | 0 | 0 | 0  | 0  | 0   | 0 |   |   |
| M02255_77_000000000-ADUT3_1_1101_9253_13466 T---AC---GT-AG-GGA-----GCG-A-G-----C--G--T---T--AT-C-CGG-AT-----TT-A--C-T--GG-GT-----GT--A-----AA-GG-GC-GT-----G-TA-G-G-C-G-----G--G-GA-A-G-C-----                              |   |     |     |    |   |    |     |    |      |   |     |    |   |   |    |    |   |   |   |   |   |   |    |    |     |   |   |   |
| AA---G-T-C-A-----G-A-T--G-TG--A-AA-AC--C-A-GT-G-G-----CT-C-AA-----C-C-A-C-T-G-G--C-C---T-G--C-A---T--T-----T--GA-A-A--C-----T--G-T--TT--T-T-C---T-T-G-A-G-T--G---A-TG----GA-G-A-----G-G-C-A--GG-C-----GG--A--ATT---C-C-G-   |   |     |     |    |   |    |     |    |      |   |     |    |   |   |    |    |   |   |   |   |   |   |    |    |     |   |   |   |
| T-GT--GT-A-G-CG-GT--G---A--A-A---TG-C-GT-AG--AT-A-TA--C-G--G-A-G-G-A-AC-A-CC--AG--T--G--GC-GAA-G--G-C--G-----G--C-C-T-G---CTG--G--AC-A-T-----T-A---A-C-T--GA--CG-C-T-G--A-GG--C-G-CG-A--AA-G-C---G-TG--GG-G--               |   |     |     |    |   |    |     |    |      |   |     |    |   |   |    |    |   |   |   |   |   |   |    |    |     |   |   |   |
| AG-C-A-AA-----CA--GG Bacteria(100);Firmicutes(100);Clostridia(100);Clostridiales(100);Ruminococcaceae(100);unclassified(100);unclassified(100);unclassified(100);unclassified(100);                                         |   |     |     |    |   |    |     |    |      |   |     |    |   |   |    |    |   |   |   |   |   |   |    |    |     |   |   |   |
| Otu1742                                                                                                                                                                                                                     | 0 | 137 | 0   | 0  | 0 | 0  | 0   | 0  | 0    | 0 | 0   | 0  | 0 | 0 | 0  | 0  | 0 | 0 | 0 | 0 | 0 | 0 | 0  | 0  | 0   | 0 | 0 | 0 |
|                                                                                                                                                                                                                             | 0 | 0   | 0   | 0  | 0 | 0  | 0   | 0  | 0    | 0 | 0   | 0  | 0 | 0 | 0  | 0  | 0 | 0 | 0 | 0 | 0 | 0 | 0  | 0  | 0   | 0 | 0 | 0 |
|                                                                                                                                                                                                                             | 0 | 0   | 0   | 0  | 0 | 0  | 0   | 0  | 0    | 0 | 0   | 0  | 0 | 0 | 0  | 0  | 0 | 0 | 0 | 0 | 0 | 0 | 0  | 0  | 0   | 0 | 0 | 0 |
|                                                                                                                                                                                                                             | 0 | 0   | 0   | 0  | 0 | 0  | 0   | 0  | 0    | 0 | 0   | 0  | 0 | 0 | 0  | 0  | 0 | 0 | 0 | 0 | 0 | 0 | 0  | 0  | 0   | 0 |   |   |
| M02255_77_000000000-ADUT3_1_1101_6958_15729 T---AC---GT-AG-GTG-----GCA-A-G-----C--G--T---T--GT-C-CGG-AT-----TT-A--C-T--GG-GT-----GT--A-----AA-GG-GC-GT-----G-TA-G-G-C-G-----G--G-AA-G-A-C-----                              |   |     |     |    |   |    |     |    |      |   |     |    |   |   |    |    |   |   |   |   |   |   |    |    |     |   |   |   |
| AG---G-T-C-A-----G-A-T--G-TG--A-AA-TG--T-C-GG-G-G-----CT-C-AA-----C-C-C-C-G-G-A--A-C---T-G--C-A---T--T-----T--GA-A-A--C-----C--G-T--TT--T-T-C---T-T-G-A-G-T--A---T-CG----GA-G-A-----G-G-C-A--GG-C-----GG--A--ATT---C-C-T-   |   |     |     |    |   |    |     |    |      |   |     |    |   |   |    |    |   |   |   |   |   |   |    |    |     |   |   |   |
| A-GT--GT-A-G-CG-GT--G---A--A-A---TG-C-GT-AG--AT-A-TT--A-G--G-A-G-G-A-AC-A-CC--AG--T--G--GC-GAA-G--G-C--G-----G--C-C-T-G---CTG--G--AC-G-A-----C-A---A-C-T--GA--CG-C-T-G--A-GG--C-G-CG-A--AA-G-C---G-TG--GG-G--               |   |     |     |    |   |    |     |    |      |   |     |    |   |   |    |    |   |   |   |   |   |   |    |    |     |   |   |   |
| AG-C-A-AA-----CA--GG Bacteria(100);Firmicutes(100);Clostridia(100);Clostridiales(100);unclassified(100);unclassified(100);unclassified(100);unclassified(100);unclassified(100);                                            |   |     |     |    |   |    |     |    |      |   |     |    |   |   |    |    |   |   |   |   |   |   |    |    |     |   |   |   |
| Otu1743                                                                                                                                                                                                                     | 0 | 432 | 140 | 0  | 0 | 0  | 404 | 21 | 1213 | 0 | 0   | 0  | 0 | 0 | 0  | 0  | 0 | 0 | 0 | 0 | 0 | 0 | 0  | 0  | 0   | 0 | 0 | 0 |
|                                                                                                                                                                                                                             | 0 | 242 | 0   | 24 | 0 | 0  | 0   | 0  | 0    | 0 | 132 | 0  | 0 | 0 | 0  | 0  | 0 | 0 | 0 | 0 | 0 | 0 | 0  | 0  | 0   | 0 | 0 | 0 |
|                                                                                                                                                                                                                             | 0 | 0   | 0   | 0  | 0 | 0  | 0   | 0  | 0    | 0 | 0   | 0  | 0 | 0 | 10 | 0  | 0 | 0 | 0 | 0 | 0 | 0 | 2  | 0  | 0   | 0 | 0 | 0 |
|                                                                                                                                                                                                                             | 0 | 0   | 0   | 0  | 0 | 0  | 0   | 0  | 0    | 0 | 82  | 0  | 0 | 4 | 0  | 0  | 0 | 0 | 0 | 0 | 0 | 0 | 26 | 11 | 248 | 0 | 0 |   |
| M02255_77_000000000-ADUT3_1_1101_14241_16007 T---AC---GT-AG-GTG-----GCA-A-G-----C--G--T---T--AT-C-CGG-AA-----TT-A--C-T--GG-GT-----GT--A-----AA-GG-GA-GC-----G-CA-G-G-C-G-----G--G-AT-A-G-C----                              |   |     |     |    |   |    |     |    |      |   |     |    |   |   |    |    |   |   |   |   |   |   |    |    |     |   |   |   |
| -----AA---G-T-C-A-----G-C-T--G--TG--A-AA-AC--T-A-TG-G-G-----CT-C-AA-----C-C-C-A-T-A-A--A-C---T-G--C-A---G--T-----T--GA-A-A--C-----T--G-T--TA--T-T-C---T-T-G-A-G-T--G---G-AG----TA-G-A-----G-G-C-A--AG-C-----GG--A--ATT---C- |   |     |     |    |   |    |     |    |      |   |     |    |   |   |    |    |   |   |   |   |   |   |    |    |     |   |   |   |
| C-G-A-GT--GT-A-G-CG-GT--G---A--A-A---TG-C-GT-AG--AT-A-TT--C-G--G-A-G-G-A-AC-A-CC--AG--T--G--GC-GAA-G--G-C--G-----G--C-T-T-G---CTG--G--GC-T-C-----T-A---A-C-T--GA--CG-C-T-G--A-GG--C-T-CG-A--AA-G-T---G-TG--GG-G--           |   |     |     |    |   |    |     |    |      |   |     |    |   |   |    |    |   |   |   |   |   |   |    |    |     |   |   |   |
| -AG-C-A-AA-----CA--GG Bacteria(100);Firmicutes(100);Clostridia(100);Clostridiales(100);Ruminococcaceae(100);unclassified(100);unclassified(100);unclassified(100);unclassified(100);                                        |   |     |     |    |   |    |     |    |      |   |     |    |   |   |    |    |   |   |   |   |   |   |    |    |     |   |   |   |
| Otu1744                                                                                                                                                                                                                     | 0 | 0   | 0   | 7  | 0 | 0  | 1   | 0  | 0    | 0 | 0   | 0  | 0 | 0 | 0  | 0  | 0 | 0 | 0 | 0 | 0 | 0 | 0  | 0  | 0   | 0 | 0 | 1 |
|                                                                                                                                                                                                                             | 0 | 0   | 0   | 0  | 0 | 0  | 0   | 0  | 0    | 0 | 0   | 0  | 0 | 0 | 0  | 0  | 0 | 0 | 0 | 0 | 0 | 0 | 1  | 0  | 0   | 0 | 0 | 0 |
|                                                                                                                                                                                                                             | 0 | 0   | 0   | 0  | 1 | 0  | 0   | 0  | 0    | 0 | 0   | 0  | 0 | 0 | 0  | 0  | 0 | 0 | 0 | 0 | 0 | 0 | 0  | 0  | 0   | 0 | 0 | 0 |
|                                                                                                                                                                                                                             | 0 | 0   | 0   | 0  | 1 | 0  | 0   | 0  | 0    | 0 | 0   | 0  | 0 | 0 | 0  | 0  | 0 | 0 | 0 | 0 | 0 | 0 | 0  | 0  | 9   | 0 |   |   |
| M02255_76_000000000-ADUNE_1_2114_12624_13351 T---GG---GT-TA-ATG-----AAG-C-G-----C--C--G---G--CT-A-ACT-AC-----GT--G--C-C--AG-CA-----GC--C-----GC-GG-TA-AT-----A-CG-T-A-G-G-----G--C-TG-C-G-A-----                            |   |     |     |    |   |    |     |    |      |   |     |    |   |   |    |    |   |   |   |   |   |   |    |    |     |   |   |   |
| -----GC---G-T-C-T-----GTC-C--G--TG--A-AT-TC--C-T-CT-G-G-----CT-C-AG-----C-T-G-G-G-G-G--C-G---T-G--C-G---G--T-----G--GG-T-A--C-----G--G-G--CT--G-G-C---T-T-G-A-G-T--G---C-GG----TA-G-G-----G-G-A-G---AC-T-----GG--A--ACT---- |   |     |     |    |   |    |     |    |      |   |     |    |   |   |    |    |   |   |   |   |   |   |    |    |     |   |   |   |
| C-C-T-G-GT--GT-A-G-CG-GT--G---G--A-A---TG-C-GC-AG--AT-A-TC--A-G--G-A-G-G-A-AC-A-CC--GG--T--G--GC-GAA-G--G-C--G-----G--G-T-C-T---CTG--G--GC-C-G-----T-T---A-C-T--GA--CG-C-T-G--A-GG--A-G-CG-A--AA-G-C---G-TG--               |   |     |     |    |   |    |     |    |      |   |     |    |   |   |    |    |   |   |   |   |   |   |    |    |     |   |   |   |
| GG-G--AG-C-G-AA-----CA--GG Bacteria(100);Actinobacteria(100);Actinobacteria(100);unclassified(100);unclassified(100);unclassified(100);unclassified(100);unclassified(100);unclassified(100);                               |   |     |     |    |   |    |     |    |      |   |     |    |   |   |    |    |   |   |   |   |   |   |    |    |     |   |   |   |



|                                                                                                                                                                                                                            |   |     |     |    |   |    |    |    |     |    |    |     |   |   |    |    |   |    |    |   |   |   |    |    |   |   |   |
|----------------------------------------------------------------------------------------------------------------------------------------------------------------------------------------------------------------------------|---|-----|-----|----|---|----|----|----|-----|----|----|-----|---|---|----|----|---|----|----|---|---|---|----|----|---|---|---|
| Otu1745                                                                                                                                                                                                                    | 0 | 0   | 0   | 0  | 0 | 0  | 0  | 0  | 0   | 0  | 2  | 0   | 0 | 0 | 0  | 0  | 0 | 0  | 0  | 0 | 0 | 0 | 0  | 0  | 2 | 5 | 0 |
|                                                                                                                                                                                                                            | 0 | 0   | 0   | 0  | 0 | 0  | 0  | 0  | 0   | 0  | 0  | 0   | 0 | 0 | 0  | 0  | 0 | 0  | 0  | 0 | 0 | 0 | 0  | 0  | 0 | 0 |   |
|                                                                                                                                                                                                                            | 0 | 0   | 0   | 0  | 0 | 0  | 0  | 0  | 0   | 0  | 0  | 0   | 0 | 0 | 0  | 0  | 0 | 0  | 0  | 0 | 0 | 2 | 0  | 0  | 0 | 0 |   |
|                                                                                                                                                                                                                            | 4 | 0   | 0   | 0  | 0 | 0  | 0  | 0  | 0   | 0  | 0  | 0   | 0 | 0 | 0  | 0  | 0 | 0  | 0  | 0 | 0 | 0 | 0  | 0  | 0 | 0 |   |
| M02255_77_000000000-ADUT3_1_2117_20466_11590 T---AC---GT-AG-ATG-----GCA-A-G-----C-G-T--T-GT-C-CGG-AT-----TT-A-T-T-GG-GC-----GT-A---AA-GC-GA-GC-----G-CA-G-G-C-G-----G--T-TC-T-T-T-----                                     |   |     |     |    |   |    |    |    |     |    |    |     |   |   |    |    |   |    |    |   |   |   |    |    |   |   |   |
| ----AA---G-T-C-T-----G-A-T--G--TG--A-AA-GA--C-C-CC-A-G-----CT-C-AA-----C-T-G-G-G-G-A--A-----G-GT-C-A--T--T-----G-GA-A-A--C-----T-G-G--AG--A-A-C---T-T-G-A-G-T--G---C-AG-----AA-G-A-----G-G-A-G---AG-T-----GG--A--ATT----   |   |     |     |    |   |    |    |    |     |    |    |     |   |   |    |    |   |    |    |   |   |   |    |    |   |   |   |
| C-C-A-T-GT--GT-A-G-CG-GT--G---A-A-A---TG-C-GT-AG--AT-A-TA--T-G--G-A-G-G-A-AC-A-CC---AG--T--G--GC-GAA-G--G-C-G-----A--C-T-C-T---CTG--G--TC-T-G-----T-A--A-C-T--GA--CG-C-T-G--A-GG--C-T-CG-A--AA-G-C---G-TG--GG-             |   |     |     |    |   |    |    |    |     |    |    |     |   |   |    |    |   |    |    |   |   |   |    |    |   |   |   |
| G--AG-C-A-AA-----CA--GG Bacteria(100);Firmicutes(100);Bacilli(100);Lactobacillales(100);Carnobacteriaceae(100);Carnobacterium(100);unclassified(100);unclassified(100);unclassified(100);                                  |   |     |     |    |   |    |    |    |     |    |    |     |   |   |    |    |   |    |    |   |   |   |    |    |   |   |   |
| Otu1746                                                                                                                                                                                                                    | 0 | 0   | 0   | 0  | 0 | 0  | 0  | 0  | 0   | 9  | 0  | 0   | 0 | 0 | 0  | 0  | 0 | 0  | 0  | 0 | 0 | 0 | 0  | 0  | 0 | 0 |   |
|                                                                                                                                                                                                                            | 0 | 0   | 0   | 0  | 0 | 0  | 0  | 0  | 0   | 0  | 0  | 0   | 0 | 0 | 0  | 0  | 0 | 0  | 0  | 0 | 0 | 0 | 0  | 0  | 0 | 0 |   |
|                                                                                                                                                                                                                            | 0 | 0   | 0   | 0  | 0 | 0  | 0  | 0  | 0   | 0  | 0  | 0   | 0 | 0 | 0  | 0  | 0 | 0  | 0  | 0 | 0 | 0 | 0  | 0  | 0 | 0 |   |
|                                                                                                                                                                                                                            | 0 | 0   | 0   | 0  | 0 | 0  | 0  | 0  | 0   | 0  | 0  | 0   | 0 | 0 | 0  | 0  | 0 | 0  | 0  | 0 | 0 | 0 | 0  | 0  | 0 | 0 |   |
| M02255_76_000000000-ADUNE_1_1106_28608_16556 .....AC---T-AC-GT-----GCC-A-G-----C-A--G---C-CG-C-GGT-AA-----TA-C-G-T--AG-GT-----GG--C---AA-GC-G--TT-----G---T-C-C-G-----G--A-TT-G-A-T-----                                   |   |     |     |    |   |    |    |    |     |    |    |     |   |   |    |    |   |    |    |   |   |   |    |    |   |   |   |
| AA---G-T-C-T-----G-A-T--G--TG--A-AA-GC--C-T-TC-G-G-----CT-C-AA-----C-C-G-A-A-G-A--A-C---T-G--C-A--T--C-----A-GA-A-A--C-----T-G-T--CA--A-T-C---T-T-G-A-G-T--G---C-AG-----AA-G-A-----G-G-A-G---AG-T-----GG--A--ACT---C-C-A-  |   |     |     |    |   |    |    |    |     |    |    |     |   |   |    |    |   |    |    |   |   |   |    |    |   |   |   |
| T-GT--GT-A-G-CG-GT--G---G--A-A---TG-C-GT-AG--AT-A-TA--T-G--G-A-A-G-A-AC-A-CC---AG--T--G--GC-GAA-G--G-C-G-----G--C-T-C-T---CTG--G--TC-T-G-----T-A--A-C-T--GA--CG-C-T-G--A-GG--C-T-CG-A--AA-G-C---A-TG--GG-T--AG-            |   |     |     |    |   |    |    |    |     |    |    |     |   |   |    |    |   |    |    |   |   |   |    |    |   |   |   |
| C-G-AA-----CA--GG Bacteria(100);Firmicutes(100);Bacilli(100);Lactobacillales(100);unclassified(100);unclassified(100);unclassified(100);unclassified(100);unclassified(100);                                               |   |     |     |    |   |    |    |    |     |    |    |     |   |   |    |    |   |    |    |   |   |   |    |    |   |   |   |
| Otu1747                                                                                                                                                                                                                    | 0 | 0   | 0   | 0  | 0 | 0  | 0  | 0  | 0   | 0  | 1  | 0   | 0 | 0 | 0  | 0  | 0 | 0  | 0  | 0 | 0 | 0 | 0  | 0  | 0 | 0 |   |
|                                                                                                                                                                                                                            | 2 | 0   | 0   | 63 | 5 | 15 | 0  | 0  | 0   | 0  | 81 | 0   | 0 | 0 | 11 | 12 | 0 | 0  | 0  | 0 | 0 | 0 | 0  | 0  | 0 | 0 |   |
|                                                                                                                                                                                                                            | 0 | 19  | 0   | 0  | 0 | 0  | 0  | 1  | 0   | 0  | 0  | 3   | 0 | 8 | 6  | 19 | 0 | 28 | 23 | 8 | 0 | 0 | 0  | 50 | 0 | 0 |   |
|                                                                                                                                                                                                                            | 6 | 0   | 0   | 0  | 0 | 21 | 8  | 0  | 0   | 51 | 2  | 268 | 1 | 0 | 5  | 0  | 0 | 0  | 0  | 0 | 0 | 0 | 0  | 0  | 0 | 0 |   |
| M02255_77_000000000-ADUT3_1_2104_24045_6228 T---AC---GT-AG-GGG-----GCG-A-G-----C-G-T--T--AT-C-CGG-AT-----TC-A-T-T-GG-GC-----GT--A---AA-GC-GC-GC-----G-TA-G-G-C-G-----G--C-CC-G-G-C-----                                    |   |     |     |    |   |    |    |    |     |    |    |     |   |   |    |    |   |    |    |   |   |   |    |    |   |   |   |
| AG---G-C-C-G-----G-G-G--G--TC--G-AA-GC--G-G-GG-G-G-----CT-C-AA-----C-C-C-C-C-C-G--A-----A-G--C-C--C-C-----C--GG-A-A--C-----C-T-C--CGC-G-G-C---T-T-G-G-G-T--C---C-GG-----TA-G-G-----G-G-A-G---GG-T-----GG--A--ACA---C-C-    |   |     |     |    |   |    |    |    |     |    |    |     |   |   |    |    |   |    |    |   |   |   |    |    |   |   |   |
| C-G-GT--GT-A-G-CG-GT--G---G--A-A---TG-C-GC-AG--AT-A-TC--G-G--G-T-G-G-A-AC-A-CC---GG--T--G--GC-GAA-G--G---C-----GGC--C-C-T---CTG--G--GC-C-G-----A-G--A-C-C--GA--CG-C-T-G--A-GG--C-G-CG-A--AA-G-C---T-GG--GG-G-              |   |     |     |    |   |    |    |    |     |    |    |     |   |   |    |    |   |    |    |   |   |   |    |    |   |   |   |
| -AG-C-G-AA-----CA--GG Bacteria(100);Actinobacteria(100);Actinobacteria(100);Coriobacteridae(100);Coriobacteriales(100);Coriobacterineae(100);Coriobacteriaceae(100);Collinsella(100);unclassified(100);                    |   |     |     |    |   |    |    |    |     |    |    |     |   |   |    |    |   |    |    |   |   |   |    |    |   |   |   |
| Otu1748                                                                                                                                                                                                                    | 0 | 0   | 0   | 0  | 0 | 0  | 0  | 0  | 0   | 21 | 0  | 0   | 0 | 0 | 0  | 0  | 0 | 0  | 0  | 0 | 0 | 0 | 0  | 0  | 0 | 0 |   |
|                                                                                                                                                                                                                            | 0 | 0   | 0   | 0  | 0 | 0  | 0  | 0  | 0   | 0  | 0  | 0   | 0 | 0 | 0  | 0  | 0 | 0  | 0  | 0 | 0 | 0 | 0  | 0  | 0 | 0 |   |
|                                                                                                                                                                                                                            | 0 | 0   | 0   | 0  | 0 | 0  | 0  | 0  | 0   | 0  | 0  | 0   | 0 | 0 | 0  | 0  | 0 | 0  | 0  | 0 | 0 | 0 | 0  | 0  | 0 | 0 |   |
|                                                                                                                                                                                                                            | 0 | 0   | 0   | 0  | 0 | 0  | 0  | 0  | 0   | 0  | 0  | 0   | 0 | 0 | 0  | 0  | 0 | 0  | 0  | 0 | 0 | 0 | 0  | 0  | 0 | 0 |   |
| M02255_76_000000000-ADUNE_1_1108_27539_19078 T---GG---CT-AA-TCT-----CGT-G-C-----C-A--G---C--AG-C-CGC-GG-----T-A--A-T--AC-GA-----GG--G---GT-GC-AA-GC-----GTTA-T-T-C-G-----G--A-AT-G-C-T-----                                |   |     |     |    |   |    |    |    |     |    |    |     |   |   |    |    |   |    |    |   |   |   |    |    |   |   |   |
| ----AA---G-T-C-A-----A-C-T--G--TT--A-AA-TT--C-C-TC-G-G-----CC-T-AA-----C-T-G-A-G-G-A--T-C---A-G--C-G---G--T-----A-GA-A-A--C-----T--G-G--CG--C-G-C---T-T-G-A-G-G--G---T-GA---GA-G-A-----G-A-G-A---AG-T-----GG--A--ATT---C-  |   |     |     |    |   |    |    |    |     |    |    |     |   |   |    |    |   |    |    |   |   |   |    |    |   |   |   |
| T-C-G-GA--GT-A-G-CG-GT--A---A--A-A---TG-C-GT-AG--AT-C-TC--G-A--G-A-G-G-A-AC-A-CC---GA--T--G--GC-GAA-G--G-C--A-----G--C-T-T-C---TTG--G--CT-C-A-----T-A---C-C-T--GA--CG-T-T-G--A-GG--C-A-CG-A--AA-G-C---G-TG--GG-G-          |   |     |     |    |   |    |    |    |     |    |    |     |   |   |    |    |   |    |    |   |   |   |    |    |   |   |   |
| -AG-C-A-AA-----CA--GG Bacteria(100);Candidate_division_TM6(100);unclassified(100);unclassified(100);unclassified(100);unclassified(100);unclassified(100);unclassified(100);unclassified(100);                             |   |     |     |    |   |    |    |    |     |    |    |     |   |   |    |    |   |    |    |   |   |   |    |    |   |   |   |
| Otu1749                                                                                                                                                                                                                    | 0 | 333 | 153 | 0  | 0 | 0  | 35 | 63 | 234 | 0  | 0  | 0   | 0 | 0 | 0  | 0  | 0 | 0  | 0  | 0 | 0 | 0 | 0  | 0  | 0 | 0 |   |
|                                                                                                                                                                                                                            | 0 | 0   | 0   | 0  | 0 | 0  | 0  | 0  | 0   | 0  | 0  | 0   | 0 | 0 | 0  | 0  | 0 | 0  | 0  | 0 | 0 | 0 | 0  | 0  | 0 | 0 |   |
|                                                                                                                                                                                                                            | 0 | 0   | 0   | 0  | 0 | 0  | 0  | 0  | 0   | 0  | 0  | 0   | 0 | 0 | 0  | 0  | 0 | 0  | 0  | 0 | 0 | 0 | 0  | 0  | 0 | 0 |   |
|                                                                                                                                                                                                                            | 0 | 0   | 0   | 0  | 0 | 0  | 0  | 0  | 0   | 0  | 0  | 0   | 0 | 0 | 0  | 0  | 0 | 0  | 0  | 0 | 0 | 0 | 94 | 0  | 0 | 0 |   |
| M02255_77_000000000-ADUT3_1_1101_7862_22325 T---AC---GT-AT-GGA-----GCA-A-G-----C-G-T--T--AT-C-CGG-AT-----TT-A-C-T--GG-GT-----GT-A---AA-GG-GA-GT-----G-TA-G-G-T-G-----G--C-CA-G-G-C-----AA-                                 |   |     |     |    |   |    |    |    |     |    |    |     |   |   |    |    |   |    |    |   |   |   |    |    |   |   |   |
| ---G-T-C-A-----G-A-A--G--TG--A-AA-GC--C-C-GG-G-G-----CT-C-AA-----C-C-C-C-G-G-G--A-C---T-G--C-T--T--T-----T-GA-A-A--C-----T--G-C--AG--G-G-C---T-A-G-A-G-T--G---C-AG-----GA-G-G-----G-G-C-A---AG-T-----GG--A--ATT---C-C-T-A- |   |     |     |    |   |    |    |    |     |    |    |     |   |   |    |    |   |    |    |   |   |   |    |    |   |   |   |
| GT--GT-A-G-CG-GT--G---A--A-A---TG-C-GT-AG--AT-A-TT--A-G--G-A-G-G-A-AC-A-CC---AG--T--G--GC-GAA-G--G-C-G-----G--C-T-T-G---CTG--G--AC-T-G-----T-A---A-C-T--GA--CA-C-T-G--A-GG--C-T-CG-A--AA-G-C---G-TG--GG-G--AG-             |   |     |     |    |   |    |    |    |     |    |    |     |   |   |    |    |   |    |    |   |   |   |    |    |   |   |   |
| C-A-AA-----CA--GG Bacteria(100);Firmicutes(100);Clostridia(100);Clostridiales(100);Lachnospiraceae(100);Lachnospira(100);unclassified(100);unclassified(100);unclassified(100);                                            |   |     |     |    |   |    |    |    |     |    |    |     |   |   |    |    |   |    |    |   |   |   |    |    |   |   |   |



Otu1750 0 55 0 0 0 0 35 0 239 0 0 0 0 0 0 0 0 0 0 0 0 0 0 0 0 0 0 0  
0 0 0 0 0 0 0 0 0 0 0 128 0 0 0 0 0 0 0 0 0 0 0 0 0 0 0 0  
0 0 0 0 0 0 0 0 0 0 0 0 0 0 0 0 0 0 0 0 0 0 0 0 0 0 0 0 0  
0 0 0 0 0 0 0 0 0 0 0 0 0 0 0 0 0 0 0 0 0 0 0 0 1 0 0  
M02255\_77\_000000000-ADUT3\_1\_1102\_20459\_9615 T---AC---GT-AG-GGG-----GCG-A-G-----C--G--T---T-GT-C-CGG-AA-----TT-A--C-T--GG-GC-----GT--A----AA-GG-GT-GC-----G-TA-G-G-C-G-----G--T-TT-G-G-T-----  
AA---G-T-T-G-----G-A-T--G--TG--A-AA-TA--C-C-CG-G-G-----CT-T-AA-----C-T-T-G-G-G-G--G-C---T-G--C-A--T--C-----C-AA-T-A--C-----T--G-T--CG--G-A-C---T-T-G-A-G-T--G---C-AG-----GA-G-A-----G-G-A-A--AG-C-----GG--A--ATT---C-C-T-  
A-GT--GT-A-G-CG-GT--G---A--A--TG-C-GT-AG--AT-A-TT--A-G--G-A-G-G-A-AC-A-CC--GG--T--G--GC-GAA-G--G-C--G-----G--C-T-T-T---CTG--G--AC-T-G-----T-A--A-C-T--GA--CG-C-T-G--A-GG--C-A-CG-A--AA-G-C---G-TG--GG-G--  
AG-C-A-AA-----CA--GG Bacteria(100);Firmicutes(100);Clostridia(100);Clostridiales(100);unclassified(100);unclassified(100);unclassified(100);unclassified(100);unclassified(100);

Otu1751 0 395 177 0 0 0 447 95 347 0 0 0 0 0 0 0 0 0 0 0 0 0 0 4 0 0 0 0  
0 0 0 0 0 0 0 0 0 0 0 20 9 0 0 49 0 0 0 32 0 0 0 0 0 0 0 0  
0 0 0 0 0 0 0 0 0 0 0 0 0 0 2 0 19 0 0 0 0 0 0 0 0 0 0 0 0  
0 0 0 0 0 0 0 0 0 0 0 0 0 0 0 10 0 0 0 0 0 0 16 367 0 0  
M02255\_77\_000000000-ADUT3\_1\_1102\_13770\_10071 T---AC---GT-AG-GGG-----GCA-A-G-----C--G--T---T-AT-C-CGG-AT-----TT-A--C-T--GG-GT-----GT--A----AA-GG-GA-GC-----G-TA-G-A-C-G-----G--A-CT-G-G-C-----  
-----AA---G-T-C-T-----G-A-T--G--TG--A-AA-GG--C-G-GG-G-G-----CT-CA-A-----C-C-C-C-T-G-G--A-C---T-G--C-A--T--T-----G--GA-A-A--C-----T--G-T--TA--G-T-C---T-T-G-A-G-T--G---C-CG-----GA-G-AG-----G-T-A--AG-C-----GG--A--ATT---  
C-C-T-A-GT--GT-A-G-CG-GT--G---A--A--TG-C-GT-AG--AT-A-TT--A-G--G-A-G-G-A-AC-A-CC--AG--T--G--GC-GAA-G--G-C--G-----G--C-T-T-A---CTG--G--AC-G-G-----T-A--A-C-T--GA--CG-T-T-G--A-GG--C-T-CG-A--AA-G-C---G-TG--GG-  
G--AG-C-A-AA-----CA--GG Bacteria(100);Firmicutes(100);Clostridia(100);Clostridiales(100);Lachnospiraceae(100);Blautia(100);unclassified(100);unclassified(100);unclassified(100);

Otu1752 0 0 0 0 0 0 0 0 0 0 0 17 0 0 0 0 0 0 0 0 0 0 0 0 0 0 0 0  
0 0 0 0 0 0 0 0 0 0 0 0 0 0 0 0 0 0 0 0 0 0 0 0 0 0 0 0  
0 0 0 0 0 0 0 0 0 0 0 0 0 0 0 0 0 0 0 0 0 0 0 0 0 0 0 0  
0 0 0 0 0 0 0 0 0 0 0 0 0 0 0 0 0 0 0 0 0 0 0 0 0 0  
M02255\_77\_000000000-ADUT3\_1\_1111\_14852\_10405 T---AC---GA-AG-GGG-----GCT-A-G-----C--G--T---T-GT-T-CGG-AA-----TT-A--C-T--GG-GC-----GT--A----AA-GC-GC-GC-----G-TA-G-G-C-G-----G--G-TA-G-A-T-----  
-----AA---G-T-T-A-----G-A-G--G--TG--A-AA-TC--C-C-AG-G-G-----CT-C-AA-----C-C-C-T-G-G-A--A-C---T-G--C-C---T--T-----T--AA-T-A--C-----T--G-T--CT--A-T-C---T-G-G-A-G-T--A---T-GG-----AA-G-A-----G-G-T-G---AG-T-----GG--A--ATT---C-  
C-G-A-GT--GT-A-G-AG-GT--G---A--A--TT-C-GT-AG--AT-A-TT--C-G--G-A-G-G-A-AC-A-TC--AG--T--G--GC-GAA-G--G-C--G-----G--C-T-C-A---CTG--G--TC-C-A-----T-T--A-C-T--GA--CG-C-T-G--A-GG--T-G-CG-A--AA-G-C---G-TG--GG-G-  
-AG-C-A-AA-----CA--GG Bacteria(100);Proteobacteria(100);Alphaproteobacteria(100);unclassified(100);unclassified(100);unclassified(100);unclassified(100);unclassified(100);unclassified(100);

Otu1753 0 0 0 0 0 0 0 0 0 0 0 0 0 3 0 0 0 0 0 0 0 0 0 0 0 0 0 0  
0 0 0 0 0 0 0 0 0 0 0 0 0 0 0 0 0 0 0 0 0 0 0 0 0 0 0 0  
0 0 0 0 0 0 0 0 0 0 0 0 0 2 0 0 0 0 0 0 0 0 0 0 0 0 0 0  
0 0 0 0 0 0 0 0 0 0 0 0 0 0 0 0 0 0 0 0 0 0 0 0 0 0  
M02255\_77\_000000000-ADUT3\_1\_2101\_27062\_19370 G---AC---AG-AA-TAA-----GCA-C-C-----G--G--C---T-AACT-CTG-TG-----CC-A--G-C--AG-CC-----GC--G---GT-AA-TA-CA-----G-AG-G-G-T-G-----C--A-AG-C-G-T-----  
-----TA---A-T-C-G-----G-A---A--T---T-AC-TC--C-C-CG-G-G-----CT-C-AA-----C-C-T-G-G-G-A--A-C---T-G--C-A--T--T-----C--AA-A-A--C-----T--G-A--CT--G-A-C---T-A-G-A-G-T--A---T-GG-----TA-G-A-----G-G-G-T---GG-T-----GG--A--ATT---T-  
C-C-T-GT--GT-A-G-CG-GT--G---A--A--TG-C-GT-AG--AT-A-TA--G-G--A-A-G-G-A-AC-A-CC--AG--T--G--GC-GAA-G--G-C--G-----A--C-C-A-C---CTG--G--AC-T-G-----A-T---A-C-T--GA--CA-C-T-G--A-GG--T-G-CG-A--AA-G-C---G-TG--GG-  
G--AG-C-A-AA-----CA--GG Bacteria(100);Proteobacteria(100);Gammaproteobacteria(100);unclassified(100);unclassified(100);unclassified(100);unclassified(100);unclassified(100);unclassified(100);

Otu1754 0 0 0 0 0 0 0 0 0 0 0 0 0 0 5 0 0 0 0 0 0 0 0 0 0 0 0 0  
0 0 0 0 0 0 0 0 0 0 0 0 0 0 0 0 0 0 0 0 0 0 0 0 0 0 0 0  
0 0 0 0 0 0 0 0 0 0 0 0 0 0 0 0 0 0 0 0 0 0 0 0 0 0 0 0  
0 0 0 0 0 0 0 0 0 0 0 0 0 0 0 0 0 0 0 0 0 0 0 0 0 0  
M02255\_76\_000000000-ADUNE\_1\_1116\_12548\_23972 C---TA---AC-TC-CGT-----GCC-A-G-----C----A---G--CC-G-CGG-TA-----AT-A--C-G--GA-GG-----GT--G----CA--A-GC--G-----T-TA-A-T-C-G-----G--T-AA-G-T-T-----  
---AA---G-T-C-A-----G-C-T--G--TG--A-AA-TC--C-C-CG-G-G-----CT-C-AA-----C-C-T-G-G-G-A--A-T---T-G--C-A--G--T-----T--GA-A-A--C-----T--G-G--CT--T-G-C---T-A-G-A-G-T--A---T-GG-----TA-G-A-----G-G-G-G---TG-T-----GG--A--ATT---T-C-  
A-G-GT--GT-A-G-CG-GT--G---A--A--TG-C-GT-AG--AT-A-TC--T-G--A-A-G-G-A-AC-A-TC--AG--T--G--GC-GAA-G--G-C--G-----A--C-A-C-C---CTG--G--AC-C-A-----A-T---A-C-T--GA--CG-C-T-G--A-GG--T-G-CG-A--AA-G-C---G-TG--GG-G--  
AG-C-A-AA-----CA--GG Bacteria(100);Proteobacteria(100);Gammaproteobacteria(100);unclassified(100);unclassified(100);unclassified(100);unclassified(100);unclassified(100);unclassified(100);



|         |                                                                                                                                                                                                                           |   |   |   |   |   |    |   |    |   |   |   |   |   |   |   |   |   |   |   |   |   |   |   |   |    |   |  |
|---------|---------------------------------------------------------------------------------------------------------------------------------------------------------------------------------------------------------------------------|---|---|---|---|---|----|---|----|---|---|---|---|---|---|---|---|---|---|---|---|---|---|---|---|----|---|--|
| Otu1755 | 65                                                                                                                                                                                                                        | 0 | 0 | 0 | 0 | 0 | 0  | 0 | 0  | 0 | 0 | 0 | 0 | 0 | 0 | 0 | 0 | 0 | 0 | 0 | 0 | 0 | 0 | 0 | 0 | 0  | 0 |  |
|         | 0                                                                                                                                                                                                                         | 0 | 0 | 0 | 0 | 0 | 0  | 0 | 0  | 0 | 0 | 0 | 0 | 0 | 0 | 0 | 0 | 0 | 0 | 0 | 0 | 0 | 0 | 0 | 0 | 0  | 0 |  |
|         | 0                                                                                                                                                                                                                         | 0 | 0 | 0 | 0 | 0 | 0  | 0 | 0  | 0 | 0 | 0 | 0 | 0 | 0 | 0 | 0 | 0 | 0 | 0 | 0 | 0 | 0 | 0 | 0 | 0  | 0 |  |
|         | 0                                                                                                                                                                                                                         | 0 | 0 | 0 | 0 | 0 | 0  | 0 | 0  | 0 | 0 | 0 | 0 | 0 | 0 | 0 | 0 | 0 | 0 | 0 | 0 | 0 | 0 | 0 | 0 | 0  | 0 |  |
|         | M02255_77_000000000-ADUT3_1_1110_10866_17474                                                                                                                                                                              |   |   |   |   |   |    |   |    |   |   |   |   |   |   |   |   |   |   |   |   |   |   |   |   |    |   |  |
|         | T---AC---GA-AG-GGG-----GCT-A-G-----C-G-T---T--GC-T-CGG-AA-----TT-A--C-T--GG-GC-----GT-A-----AA-GG-GC-GC-----G-TA-G-G-C-G-----G--T-CT-G-C-C-----                                                                           |   |   |   |   |   |    |   |    |   |   |   |   |   |   |   |   |   |   |   |   |   |   |   |   |    |   |  |
|         | -----AA---G-T-C-A-----G-G-C--G-TG--A-AA-TT--C-C-TG-G-G----CT-C-AA-----C-C-T-G-G-G-G--A-C---T-G--C-G--C--T-----T--GA-T-A--C-----T--G-G--CG--G-A-C---T-T-G-A-G-G--A---T-GG-----AA-G-A-----G-G-C-T---CG-T-----GG--A--ATT---- |   |   |   |   |   |    |   |    |   |   |   |   |   |   |   |   |   |   |   |   |   |   |   |   |    |   |  |
|         | C-C-C-A-GT--GT-A-G-AG-GT--G---A--A---TT-C-GT-AG--AT-A-TT--G-G--G-A-A-G-A-AC-A-CC---GG--T--G--GC-GAA-G--G-C--G-----G--C-G-A-G---CTG--G--TC-C-A-----T-T---A-C-T--GA--CG-C-T-G--A-GG--C-G-CG-A--CA-G-C---G-TG--              |   |   |   |   |   |    |   |    |   |   |   |   |   |   |   |   |   |   |   |   |   |   |   |   |    |   |  |
|         | GG-G--AG-C-A-AA-----CA--GG Bacteria(100);Proteobacteria(100);Alphaproteobacteria(100);Rhodospirillales(100);Acetobacteraceae(100);Roseomonas(100);unclassified(100);unclassified(100);unclassified(100);                  |   |   |   |   |   |    |   |    |   |   |   |   |   |   |   |   |   |   |   |   |   |   |   |   |    |   |  |
| Otu1756 | 0                                                                                                                                                                                                                         | 0 | 0 | 1 | 0 | 0 | 0  | 0 | 0  | 0 | 0 | 0 | 0 | 0 | 0 | 0 | 0 | 0 | 0 | 0 | 0 | 0 | 0 | 0 | 0 | 0  | 0 |  |
|         | 0                                                                                                                                                                                                                         | 0 | 0 | 0 | 0 | 0 | 0  | 0 | 0  | 0 | 0 | 0 | 0 | 0 | 0 | 0 | 0 | 0 | 0 | 0 | 0 | 0 | 0 | 0 | 0 | 0  | 0 |  |
|         | 0                                                                                                                                                                                                                         | 0 | 0 | 0 | 0 | 0 | 0  | 0 | 0  | 0 | 0 | 0 | 0 | 0 | 0 | 0 | 0 | 0 | 0 | 0 | 0 | 0 | 0 | 0 | 0 | 12 | 0 |  |
|         | 0                                                                                                                                                                                                                         | 0 | 0 | 0 | 0 | 0 | 0  | 0 | 0  | 0 | 0 | 0 | 0 | 0 | 0 | 0 | 0 | 0 | 0 | 0 | 0 | 0 | 0 | 0 | 0 | 0  | 0 |  |
|         | M02255_77_000000000-ADUT3_1_2117_16347_12506                                                                                                                                                                              |   |   |   |   |   |    |   |    |   |   |   |   |   |   |   |   |   |   |   |   |   |   |   |   |    |   |  |
|         | T---AC---GT-AG-GGT-----GCG-A-G-----C-G-T---T--GT-C-CGG-AA-----TT-A--T-T--GG-GC-----GT-A-----AA-GG-GA-TT-----G-TA-G-G-C-G-----G--T-CC-G-T-C-----                                                                           |   |   |   |   |   |    |   |    |   |   |   |   |   |   |   |   |   |   |   |   |   |   |   |   |    |   |  |
|         | -----GC---G-T-C-G-----A-A-A-G-TG--A-AA-AC--T-C-AG-G-G----CT-C-AA-----C-C-C-T-G-A-G--C-C---T-G--C-T---T--T-----C--GA-T-A--C-----G-G-G--CG--G-A-C---T-A-G-A-G-G--T---A-TG---CA-G-G-----G-G-A-G---AA-C-----GG--A--ATT----    |   |   |   |   |   |    |   |    |   |   |   |   |   |   |   |   |   |   |   |   |   |   |   |   |    |   |  |
|         | C-C-T-G-GT--GG-A-G-CG-GT--G---G--A-A---TG-C-GC-AG--AT-A-TC--A-G--G-A-G-G-A-AC-A-CC---GG--T--G--GC-GAA-G--G-C--G-----G--T-T-C-T---CTG--G--GC-A-T-----T-A---C-C-T--GA--CG-C-T-G--A-GA--A-T-CG-A--AA-G-C---G-TG--            |   |   |   |   |   |    |   |    |   |   |   |   |   |   |   |   |   |   |   |   |   |   |   |   |    |   |  |
|         | GG-G--AG-C-A-AA-----CA--GG Bacteria(100);Actinobacteria(100);Actinobacteria(100);Actinobacteridae(100);Actinomycetales(100);Propionibacterineae(100);unclassified(100);unclassified(100);unclassified(100);               |   |   |   |   |   |    |   |    |   |   |   |   |   |   |   |   |   |   |   |   |   |   |   |   |    |   |  |
| Otu1757 | 0                                                                                                                                                                                                                         | 0 | 0 | 0 | 0 | 0 | 1  | 8 | 0  | 0 | 0 | 0 | 0 | 0 | 0 | 0 | 0 | 0 | 0 | 0 | 0 | 0 | 0 | 0 | 0 | 0  | 0 |  |
|         | 0                                                                                                                                                                                                                         | 0 | 0 | 0 | 0 | 0 | 0  | 0 | 0  | 0 | 0 | 0 | 0 | 0 | 0 | 0 | 0 | 0 | 0 | 0 | 0 | 0 | 0 | 0 | 0 | 0  | 0 |  |
|         | 0                                                                                                                                                                                                                         | 0 | 0 | 0 | 0 | 0 | 0  | 0 | 0  | 0 | 0 | 0 | 0 | 0 | 0 | 0 | 0 | 0 | 0 | 0 | 0 | 0 | 0 | 0 | 0 | 0  | 0 |  |
|         | 0                                                                                                                                                                                                                         | 0 | 0 | 0 | 0 | 0 | 0  | 0 | 0  | 0 | 0 | 0 | 0 | 0 | 0 | 0 | 0 | 0 | 0 | 0 | 4 | 0 | 4 | 0 | 0 | 0  | 0 |  |
|         | M02255_76_000000000-ADUNE_1_2114_26320_16859                                                                                                                                                                              |   |   |   |   |   |    |   |    |   |   |   |   |   |   |   |   |   |   |   |   |   |   |   |   |    |   |  |
|         | T---AC---GTGCC-AGCA-----GCC-G-C-----G--G-T---A--AT-A-CGT-AG-----GG-T--A-C--TA-GC-----GT-T-----GT-CC-GG-AT-----T-TA---T-T-G-----G--T-TT-G-T-C-----                                                                         |   |   |   |   |   |    |   |    |   |   |   |   |   |   |   |   |   |   |   |   |   |   |   |   |    |   |  |
|         | ---GC---G-T-C-T-----G-T-C--G-TG--A-AA-GC--C-T-GT-G-G----CT-T-AA-----C-C-A-T-G-G-G--C-T---T-G--C-G--G--T-----G--GG-T-A--C-----G--G-G--CA--G-G-C---T-T-G-A-G-T--G---C-GG---TA-G-G-----G-G-A-G---AC-T-----GG--A--ATT---C-    |   |   |   |   |   |    |   |    |   |   |   |   |   |   |   |   |   |   |   |   |   |   |   |   |    |   |  |
|         | C-T-G-GT--GT-A-G-CG-GT--G---G--A-A---TG-C-GC-AG--AT-A-TC--A-G--G-A-G-G-A-AC-A-CC---GG--T--G--GC-GAA-G--G-C--G-----G--G-T-C-T---CTG--G--GC-C-G-----T-T---A-C-T--GA--CA-C-T-G--A-GG--A-G-CG-A--AA-G-C---G-TG--GG-           |   |   |   |   |   |    |   |    |   |   |   |   |   |   |   |   |   |   |   |   |   |   |   |   |    |   |  |
|         | G--AG-C-G-AA-----CA--GG Bacteria(100);Actinobacteria(100);Actinobacteria(100);Actinobacteridae(100);Actinomycetales(100);unclassified(100);unclassified(100);unclassified(100);unclassified(100);                         |   |   |   |   |   |    |   |    |   |   |   |   |   |   |   |   |   |   |   |   |   |   |   |   |    |   |  |
| Otu1758 | 18                                                                                                                                                                                                                        | 0 | 0 | 0 | 0 | 0 | 0  | 0 | 0  | 0 | 0 | 0 | 0 | 0 | 0 | 0 | 0 | 0 | 0 | 0 | 0 | 0 | 0 | 0 | 0 | 0  | 0 |  |
|         | 0                                                                                                                                                                                                                         | 0 | 0 | 0 | 0 | 0 | 0  | 0 | 0  | 0 | 0 | 0 | 0 | 0 | 0 | 0 | 0 | 0 | 0 | 0 | 0 | 0 | 0 | 0 | 0 | 0  | 0 |  |
|         | 0                                                                                                                                                                                                                         | 0 | 0 | 0 | 0 | 0 | 0  | 0 | 0  | 0 | 0 | 0 | 0 | 0 | 0 | 0 | 0 | 0 | 0 | 0 | 0 | 0 | 0 | 0 | 0 | 0  | 0 |  |
|         | 0                                                                                                                                                                                                                         | 0 | 0 | 0 | 0 | 0 | 0  | 0 | 0  | 0 | 0 | 0 | 0 | 0 | 0 | 0 | 0 | 0 | 0 | 0 | 0 | 0 | 0 | 0 | 0 | 0  | 0 |  |
|         | M02255_77_000000000-ADUT3_1_1102_10242_18631                                                                                                                                                                              |   |   |   |   |   |    |   |    |   |   |   |   |   |   |   |   |   |   |   |   |   |   |   |   |    |   |  |
|         | T---AC---GT-AG-GAG-----GCG-A-G-----C-G-T---T--GT-C-CGG-AT-----TT-A--C-T--GG-GC-----GT-A-----AA-GC-GC-GC-----G-CA-G-G-C-G-----G--C-AT-G-G-C-----                                                                           |   |   |   |   |   |    |   |    |   |   |   |   |   |   |   |   |   |   |   |   |   |   |   |   |    |   |  |
|         | -----AA---G-T-A-A-----G-G-T--G--TG--A-AA-TC--T-C-CC-T-G----CC-T-AA-----C-G-G-G-G-A-G--G-G---T-G--C-A--C--T-----T--TA-G-A--C-----T--G-C--CA--A-G-C---T-A-G-A-G-G--A---C-GG---TA-G-A-----G-G-G-G---GG-T-----AG--A--ATT----  |   |   |   |   |   |    |   |    |   |   |   |   |   |   |   |   |   |   |   |   |   |   |   |   |    |   |  |
|         | G-C-T-G-GT--GT-A-G-CG-GT--G---A--A---TG-C-GT-AG--AG-A-TC--A-G--C-A-G-G-A-AT-A-CC---CG--T--G--GC-GAA-G--G-C--G-----G--C-C-C-C---CTG--G--GC-C-G-----A-A---C-C-T--GA--CG-C-T-G--A-GG--C-G-CG-A--AG-G-C---T-AG--              |   |   |   |   |   |    |   |    |   |   |   |   |   |   |   |   |   |   |   |   |   |   |   |   |    |   |  |
|         | GG-G--AG-C-G-AA-----CG--GG Bacteria(100);unclassified(100);unclassified(100);unclassified(100);unclassified(100);unclassified(100);unclassified(100);unclassified(100);                                                   |   |   |   |   |   |    |   |    |   |   |   |   |   |   |   |   |   |   |   |   |   |   |   |   |    |   |  |
| Otu1759 | 0                                                                                                                                                                                                                         | 0 | 0 | 0 | 0 | 0 | 71 | 0 | 53 | 0 | 0 | 0 | 0 | 0 | 0 | 0 | 0 | 0 | 0 | 0 | 0 | 0 | 0 | 0 | 0 | 0  | 0 |  |
|         | 0                                                                                                                                                                                                                         | 0 | 0 | 0 | 0 | 0 | 0  | 0 | 0  | 0 | 0 | 0 | 0 | 0 | 0 | 0 | 0 | 0 | 0 | 0 | 0 | 0 | 0 | 0 | 0 | 0  | 0 |  |
|         | 0                                                                                                                                                                                                                         | 0 | 0 | 0 | 0 | 0 | 0  | 0 | 0  | 0 | 0 | 0 | 0 | 0 | 0 | 0 | 0 | 0 | 0 | 0 | 0 | 0 | 0 | 0 | 0 | 0  | 0 |  |
|         | 0                                                                                                                                                                                                                         | 0 | 0 | 0 | 0 | 9 | 0  | 0 | 0  | 0 | 0 | 0 | 0 | 0 | 0 | 0 | 0 | 0 | 0 | 0 | 0 | 0 | 0 | 0 | 0 | 0  | 0 |  |
|         | M02255_77_000000000-ADUT3_1_2103_19432_23475                                                                                                                                                                              |   |   |   |   |   |    |   |    |   |   |   |   |   |   |   |   |   |   |   |   |   |   |   |   |    |   |  |
|         | T---AC---GT-AG-GGG-----GCA-A-G-----C-G-T---T--AT-C-CGG-AT-----TT-A--C-T--GG-GT-----GT-A-----AA-GG-GA-GC-----G-TA-G-A-C-G-----G--T-AT-G-G-C-----                                                                           |   |   |   |   |   |    |   |    |   |   |   |   |   |   |   |   |   |   |   |   |   |   |   |   |    |   |  |
|         | -----AA---G-T-C-T-----G-A-T--G--TG--A-AA-GG--C-C-AG-G-G----CT-C-AA-----C-C-C-T-G-G-G--A-C---T-G--C-A--T--T-----G--GA-A-A--C-----T--G-T--CG--A-A-C---T-A-G-A-G-T--G---T-CG---GA-G-A-----G-G-C-A---AG-T-----GG--A--ATT----  |   |   |   |   |   |    |   |    |   |   |   |   |   |   |   |   |   |   |   |   |   |   |   |   |    |   |  |
|         | C-C-T-A-GT--GT-A-G-CG-GT--G---A--A---TG-C-GT-AG--AT-A-TT--A-G--G-A-G-G-A-AC-A-CC---AG--T--G--GC-GAA-G--G-C--G-----G--C-T-T-G---CTG--G--AC-G-A-----T-G---A-C-T--GA--CG-T-T-G--A-GG--C-T-CG-A--AA-G-C---G-TG--GG-           |   |   |   |   |   |    |   |    |   |   |   |   |   |   |   |   |   |   |   |   |   |   |   |   |    |   |  |
|         | G--AG-C-A-AA-----CA--GG Bacteria(100);Firmicutes(100);Clostridia(100);Clostridiales(100);Lachnospiraceae(100);unclassified(100);unclassified(100);unclassified(100);unclassified(100);                                    |   |   |   |   |   |    |   |    |   |   |   |   |   |   |   |   |   |   |   |   |   |   |   |   |    |   |  |



[illegible]



|                                              |     |   |   |   |   |   |   |    |                                                                                                                                                                                                                                 |   |   |   |   |   |   |   |   |   |   |   |   |   |   |   |   |   |   |
|----------------------------------------------|-----|---|---|---|---|---|---|----|---------------------------------------------------------------------------------------------------------------------------------------------------------------------------------------------------------------------------------|---|---|---|---|---|---|---|---|---|---|---|---|---|---|---|---|---|---|
| Otu1765                                      | 0   | 0 | 0 | 0 | 0 | 0 | 1 | 29 | 0                                                                                                                                                                                                                               | 0 | 0 | 0 | 0 | 0 | 0 | 0 | 0 | 0 | 0 | 0 | 0 | 0 | 0 | 0 | 0 | 0 | 0 |
|                                              | 0   | 0 | 0 | 0 | 0 | 0 | 0 | 0  | 0                                                                                                                                                                                                                               | 0 | 0 | 0 | 0 | 0 | 0 | 0 | 0 | 0 | 0 | 0 | 0 | 0 | 0 | 0 | 0 | 0 |   |
|                                              | 0   | 0 | 0 | 0 | 0 | 0 | 0 | 0  | 0                                                                                                                                                                                                                               | 0 | 0 | 0 | 0 | 0 | 0 | 0 | 0 | 0 | 0 | 0 | 0 | 0 | 0 | 0 | 0 | 0 |   |
|                                              | 0   | 0 | 0 | 0 | 0 | 0 | 0 | 0  | 0                                                                                                                                                                                                                               | 0 | 0 | 0 | 0 | 0 | 0 | 0 | 0 | 0 | 0 | 0 | 0 | 0 | 0 | 0 | 0 | 0 |   |
| M02255_77_000000000-ADUT3_1_1117_22972_11780 |     |   |   |   |   |   |   |    | G---AC--AG-AG-GAT-----GCA-A-G-----A-G--T--T--AT-C-CGG-AA-----TG-A--C-T--GG-GC-----GT--A----AA-GT-TT-CT-----G-TA-G-G-T-G-----G--C-TT-T-T-C-----                                                                                  |   |   |   |   |   |   |   |   |   |   |   |   |   |   |   |   |   |   |
|                                              |     |   |   |   |   |   |   |    | ----AA---G-T-C-C-----G-T-C--G--TC--A-AA-TC--C-C-AG-G-G-----CT-C-AA-----C-C-C-T-A-G-A--C-A---G-A--C-G--G--T-----G--GA-A-A--C-----T-A-T--CA--A-G-C---T-G-G-A-G-T--A---T-GG----TA-G-G-----G-G-C-A--GA-G-----GG--A--ATT---T-        |   |   |   |   |   |   |   |   |   |   |   |   |   |   |   |   |   |   |
|                                              |     |   |   |   |   |   |   |    | C-C-G-GT--GG-A-G-CG-AT--G---A--A-A---TG-C-GT-TG--AG-A-TC--G-G--A-A-A-G-A-AC-A-CC---AA--T--G--GC-GAA-A--G-C--T-----C--T-C-T-G---CTG--G--GC-C-G-----A-C---A-C-T--GA--CA-C-T-C--A-GA--G-A-TG-A--AA-G-C---T-AG--GG-G-               |   |   |   |   |   |   |   |   |   |   |   |   |   |   |   |   |   |   |
|                                              |     |   |   |   |   |   |   |    | -AG-A-A-AA-----TG--GG                                                                                                                                                                                                           |   |   |   |   |   |   |   |   |   |   |   |   |   |   |   |   |   |   |
|                                              |     |   |   |   |   |   |   |    | Bacteria(100);unclassified(100);unclassified(100);unclassified(100);unclassified(100);unclassified(100);unclassified(100);unclassified(100);unclassified(100);                                                                  |   |   |   |   |   |   |   |   |   |   |   |   |   |   |   |   |   |   |
| Otu1766                                      | 130 | 0 | 0 | 0 | 0 | 0 | 0 | 0  | 0                                                                                                                                                                                                                               | 0 | 0 | 0 | 0 | 0 | 0 | 0 | 0 | 0 | 0 | 0 | 0 | 0 | 0 | 0 | 0 | 0 |   |
|                                              | 0   | 0 | 0 | 0 | 0 | 0 | 0 | 0  | 0                                                                                                                                                                                                                               | 0 | 0 | 0 | 0 | 0 | 0 | 0 | 0 | 0 | 0 | 0 | 0 | 0 | 0 | 0 | 0 | 0 |   |
|                                              | 0   | 0 | 0 | 0 | 0 | 0 | 0 | 0  | 0                                                                                                                                                                                                                               | 0 | 0 | 0 | 0 | 0 | 0 | 0 | 0 | 0 | 0 | 0 | 0 | 0 | 0 | 0 | 0 | 0 |   |
|                                              | 0   | 0 | 0 | 0 | 0 | 0 | 0 | 0  | 0                                                                                                                                                                                                                               | 0 | 0 | 0 | 0 | 0 | 0 | 0 | 0 | 0 | 0 | 0 | 0 | 0 | 0 | 0 | 0 | 0 |   |
| M02255_77_000000000-ADUT3_1_1102_9029_13006  |     |   |   |   |   |   |   |    | T---AC--GT-AG-GTG-----GCG-A-G-----C--G--T--T--GT-C-CGG-AT-----TT-A--C-T--GG-GT-----GT--A----AA-GG-GC-GC-----G-TA-G-G-C-G-----G--G-GA-T-G-C-----                                                                                 |   |   |   |   |   |   |   |   |   |   |   |   |   |   |   |   |   |   |
|                                              |     |   |   |   |   |   |   |    | AA---G-T-C-A-----G-A-T--G--TG--A-AA-TC--T-C-CA-G-G-----CT-C-AA-----C-C-T-G-G-A-A--A-C---T-G--C-A---T--T-----T--GA-A-A--C-----T--G-C--AT--T-T-C---T-T-G-A-G-T--A---T-CG----GA-G-A-----G-G-C-A--GG-C-----GG--A--ATT---C-C-G-      |   |   |   |   |   |   |   |   |   |   |   |   |   |   |   |   |   |   |
|                                              |     |   |   |   |   |   |   |    | T-GT--GT-A-G-CG-GT--G---A--A-A---TG-C-GT-AG--AT-A-TA--C-G--G-A-A-G-A-AC-A-CC---AG--T--G--GC-GAA-G--G-C--G-----G--C-C-T-G---CTG--G--AC-G-A-----C-A--A-C-T--GA--CG-C-T-G--A-GG--C-G-CG-A--AA-G-C---G-TG--GG-G--                   |   |   |   |   |   |   |   |   |   |   |   |   |   |   |   |   |   |   |
|                                              |     |   |   |   |   |   |   |    | AG-C-A-AA-----CA--GG                                                                                                                                                                                                            |   |   |   |   |   |   |   |   |   |   |   |   |   |   |   |   |   |   |
|                                              |     |   |   |   |   |   |   |    | Bacteria(100);Firmicutes(100);Clostridia(100);Clostridiales(100);unclassified(100);unclassified(100);unclassified(100);unclassified(100);unclassified(100);                                                                     |   |   |   |   |   |   |   |   |   |   |   |   |   |   |   |   |   |   |
| Otu1767                                      | 141 | 0 | 0 | 0 | 0 | 0 | 0 | 0  | 0                                                                                                                                                                                                                               | 0 | 0 | 0 | 0 | 0 | 0 | 0 | 0 | 0 | 0 | 0 | 0 | 0 | 0 | 0 | 0 | 0 |   |
|                                              | 0   | 0 | 0 | 0 | 0 | 0 | 0 | 0  | 0                                                                                                                                                                                                                               | 0 | 0 | 0 | 0 | 0 | 0 | 0 | 0 | 0 | 0 | 0 | 0 | 0 | 0 | 0 | 0 | 0 |   |
|                                              | 0   | 0 | 0 | 0 | 0 | 0 | 0 | 0  | 0                                                                                                                                                                                                                               | 0 | 0 | 0 | 0 | 0 | 0 | 0 | 0 | 0 | 0 | 0 | 0 | 0 | 0 | 0 | 0 | 0 |   |
|                                              | 0   | 0 | 0 | 0 | 0 | 0 | 0 | 0  | 0                                                                                                                                                                                                                               | 0 | 0 | 0 | 0 | 0 | 0 | 0 | 0 | 0 | 0 | 0 | 0 | 0 | 0 | 0 | 0 | 0 |   |
| M02255_77_000000000-ADUT3_1_1107_11795_21241 |     |   |   |   |   |   |   |    | T---AC--GG-AG-GGG-----GCT-A-G-----C--G--T--T--GT-T-CGG-AA-----TT-A--C-T--GG-GC-----GT--A----AA-GC-GC-AC-----G-TA-G-G-C-G-----G--T-TG-C-T-C-----                                                                                 |   |   |   |   |   |   |   |   |   |   |   |   |   |   |   |   |   |   |
|                                              |     |   |   |   |   |   |   |    | ----AA---G-T-C-A-----G-A-G--G--TG--A-AA-GC--C-T-GG-A-G-----CT-C-AA-----C-T-C-C-A-G-A--A-C---T-G--C-C---T--T-----T--GA-A-A--C-----T--A-G--GT--G-A-C---T-T-G-A-A-T--C---C-AG----GA-G-A-----G-G-T-G---AG-T-----GG--A--ATT---C-C-T- |   |   |   |   |   |   |   |   |   |   |   |   |   |   |   |   |   |   |
|                                              |     |   |   |   |   |   |   |    | C-G-A-GT--GT-A-G-AG-GT--G---A--A-A---TT-C-GT-AG--AT-A-TT--C-G--G-A-A-G-A-AC-A-CC---AG--T--G--GC-GAA-G--G-C--G-----G--C-T-C-A---CTG--G--AC-T-G-----G-T---A-T-T--GA--CG-C-T-G--A-GG--T-G-CG-A--AA-G-C---G-TG--GG-                 |   |   |   |   |   |   |   |   |   |   |   |   |   |   |   |   |   |   |
|                                              |     |   |   |   |   |   |   |    | G--AG-C-A-AA-----CA--GG                                                                                                                                                                                                         |   |   |   |   |   |   |   |   |   |   |   |   |   |   |   |   |   |   |
|                                              |     |   |   |   |   |   |   |    | Bacteria(100);Proteobacteria(100);Alphaproteobacteria(100);Sphingomonadales(100);unclassified(100);unclassified(100);unclassified(100);unclassified(100);unclassified(100);                                                     |   |   |   |   |   |   |   |   |   |   |   |   |   |   |   |   |   |   |
| Otu1768                                      | 0   | 0 | 0 | 0 | 0 | 0 | 4 | 92 | 0                                                                                                                                                                                                                               | 0 | 0 | 0 | 0 | 0 | 0 | 0 | 0 | 0 | 0 | 0 | 0 | 0 | 0 | 0 | 0 | 0 |   |
|                                              | 0   | 0 | 0 | 0 | 0 | 0 | 0 | 0  | 0                                                                                                                                                                                                                               | 0 | 0 | 0 | 0 | 0 | 0 | 0 | 0 | 0 | 0 | 0 | 0 | 0 | 0 | 0 | 0 | 0 |   |
|                                              | 0   | 0 | 0 | 0 | 0 | 0 | 0 | 0  | 0                                                                                                                                                                                                                               | 0 | 0 | 0 | 0 | 0 | 0 | 0 | 0 | 0 | 0 | 0 | 0 | 0 | 0 | 0 | 0 | 0 |   |
|                                              | 0   | 0 | 0 | 0 | 0 | 0 | 0 | 0  | 0                                                                                                                                                                                                                               | 0 | 0 | 0 | 0 | 0 | 0 | 0 | 0 | 0 | 0 | 0 | 0 | 0 | 0 | 0 | 0 | 0 |   |
| M02255_77_000000000-ADUT3_1_1111_27853_9522  |     |   |   |   |   |   |   |    | T---AC--GG-AG-GAT-----CCA-A-G-----C--G--T--T--AT-C-CGG-AA-----TT-A--C-T--GG-GC-----GT--A----AA-GA-GTTGC-----G-TA-G-G-C-G-----G--C-AT-T-G-T-----                                                                                 |   |   |   |   |   |   |   |   |   |   |   |   |   |   |   |   |   |   |
|                                              |     |   |   |   |   |   |   |    | AA---G-T-A-G-----G-T-A--G--TG--A-AA-TC--C-T-GG-G-G-----CT-C-AA-----C-C-C-T-T-T-A--A-A---C-A--T-T---A--T-----C--TA-A-A--C-----T--G-C--AAA-G---C---T-A-G-A-A-T--A---T-GA----GA-G-A-----G-G-T-C---GC-T-----GG--A--ATT---C-C-T-     |   |   |   |   |   |   |   |   |   |   |   |   |   |   |   |   |   |   |
|                                              |     |   |   |   |   |   |   |    | A-GT--GT-A-G-GA-GT--G---A--A-A---TC-C-GT-AG--AT-A-TT--A-G--G-A-A-G-A-AC-A-CC---GA--T--G--GC-GTA-G--G-C--A-----G--G-C-G-A---CTG--G--CT-C-A-----T-T---A-T-T--GA--CG-C-T-A--A-GG--C-A-CG-A--AA-G-C---G-TG--GG-T--AG-               |   |   |   |   |   |   |   |   |   |   |   |   |   |   |   |   |   |   |
|                                              |     |   |   |   |   |   |   |    | C-A-AA-----CG--GG                                                                                                                                                                                                               |   |   |   |   |   |   |   |   |   |   |   |   |   |   |   |   |   |   |
|                                              |     |   |   |   |   |   |   |    | Bacteria(100);Candidate_division_TM7(100);unclassified(100);unclassified(100);unclassified(100);unclassified(100);unclassified(100);unclassified(100);unclassified(100);                                                        |   |   |   |   |   |   |   |   |   |   |   |   |   |   |   |   |   |   |
| Otu1769                                      | 0   | 0 | 0 | 0 | 0 | 0 | 6 | 1  | 92                                                                                                                                                                                                                              | 0 | 0 | 0 | 0 | 0 | 0 | 0 | 0 | 0 | 0 | 0 | 0 | 0 | 0 | 0 | 0 | 0 |   |
|                                              | 0   | 0 | 0 | 0 | 0 | 0 | 0 | 0  | 0                                                                                                                                                                                                                               | 0 | 0 | 0 | 0 | 0 | 0 | 0 | 0 | 0 | 0 | 0 | 0 | 0 | 0 | 0 | 0 | 0 |   |
|                                              | 0   | 0 | 0 | 0 | 0 | 0 | 0 | 0  | 0                                                                                                                                                                                                                               | 0 | 0 | 0 | 0 | 0 | 0 | 0 | 0 | 0 | 0 | 0 | 0 | 0 | 0 | 0 | 0 | 0 |   |
|                                              | 0   | 0 | 0 | 0 | 0 | 0 | 0 | 0  | 0                                                                                                                                                                                                                               | 0 | 0 | 0 | 0 | 0 | 0 | 0 | 0 | 0 | 0 | 0 | 0 | 0 | 0 | 0 | 0 | 0 |   |
| M02255_77_000000000-ADUT3_1_1115_17008_22576 |     |   |   |   |   |   |   |    | T---AC--GT-AG-GGG-----GCA-A-G-----C--G--T--T--AT-C-CGG-AT-----TT-A--C-T--GG-GT-----GT--A----AA-GG-GA-GC-----G-TA-G-A-C-G-----G--C-AA-G-G-C----                                                                                  |   |   |   |   |   |   |   |   |   |   |   |   |   |   |   |   |   |   |
|                                              |     |   |   |   |   |   |   |    | -----AA---G-T-C-T-----G-A-A--G--TG--A-AA-GC--C-C-GG-T-G-----CT-T-AA-----C-G-C-C-G-G-G--A-C---T-G--C-T---T--T-----G--GA-A-A--C-----T--G-T--TT--G-G-C---T-G-G-A-G-T--G---C-CG----GA-G-A-----G-G-T-A---AG-C-----GG--A--ATT----     |   |   |   |   |   |   |   |   |   |   |   |   |   |   |   |   |   |   |
|                                              |     |   |   |   |   |   |   |    | C-C-T-A-GT--GT-A-G-CG-GT--G---A--A-A---TG-C-GT-AG--AT-A-TT--A-G--G-A-A-G-A-AC-A-CC---AG--T--G--GC-GAA-G--G-C--G-----G--C-T-T-A---CTG--G--AC-G-G-----T-A---A-C-T--GA--CG-T-T-G--A-GG--C-T-CG-A--AA-G-C---G-TG--GG-               |   |   |   |   |   |   |   |   |   |   |   |   |   |   |   |   |   |   |
|                                              |     |   |   |   |   |   |   |    | G--AG-C-A-AA-----CA--GG                                                                                                                                                                                                         |   |   |   |   |   |   |   |   |   |   |   |   |   |   |   |   |   |   |
|                                              |     |   |   |   |   |   |   |    | Bacteria(100);Firmicutes(100);Clostridia(100);Clostridiales(100);Lachnospiraceae(100);unclassified(100);unclassified(100);unclassified(100);unclassified(100);                                                                  |   |   |   |   |   |   |   |   |   |   |   |   |   |   |   |   |   |   |



|                                                                                                                                                                                                                       |   |   |   |   |   |   |    |    |   |   |    |    |   |   |   |   |   |    |   |    |   |   |   |   |   |   |   |   |
|-----------------------------------------------------------------------------------------------------------------------------------------------------------------------------------------------------------------------|---|---|---|---|---|---|----|----|---|---|----|----|---|---|---|---|---|----|---|----|---|---|---|---|---|---|---|---|
| Otu1770                                                                                                                                                                                                               | 0 | 0 | 0 | 0 | 0 | 0 | 0  | 0  | 0 | 0 | 0  | 24 | 1 | 0 | 0 | 2 | 2 | 12 | 6 | 25 | 0 | 3 | 0 | 2 | 0 | 0 | 1 | 1 |
|                                                                                                                                                                                                                       | 0 | 0 | 0 | 0 | 0 | 0 | 0  | 0  | 0 | 0 | 0  | 4  | 0 | 0 | 0 | 0 | 0 | 0  | 0 | 0  | 0 | 0 | 0 | 0 | 0 | 0 | 0 |   |
|                                                                                                                                                                                                                       | 0 | 0 | 0 | 0 | 0 | 1 | 7  | 0  | 0 | 2 | 16 | 0  | 0 | 0 | 0 | 0 | 4 | 0  | 0 | 0  | 0 | 0 | 0 | 0 | 0 | 0 | 0 |   |
|                                                                                                                                                                                                                       | 0 | 0 | 0 | 0 | 0 | 6 | 0  | 2  | 2 | 0 | 3  | 0  | 0 | 2 | 0 | 0 | 0 | 0  | 0 | 0  | 0 | 0 | 0 | 0 | 0 | 0 |   |   |
| M02255_77_000000000-ADUT3_1_2103_9878_12175 C---AG---CA-GC-CGC-----GGT-A-----A-T-A--C-AG-A-GGG-TG-----CA-A-G-C-GT-TA-----AT-C---GG-AT-TT-AC-----G-TA-G-G-T-G-----G-C-CA-A-T-T-----AA--                                |   |   |   |   |   |   |    |    |   |   |    |    |   |   |   |   |   |    |   |    |   |   |   |   |   |   |   |   |
| --G-T-C-A-----A-A-T-G--TG--A-AA-TC--C-C-CG-A-G----CT-T-AA-----C-T-T-G-G-G-A-A-T---T-G-C-A--T-T-----C-GA-T-A--C-----T--G-G--TT-G-G-C---T-A-G-A-G-T-A--T-GG----GA-G-A-----G-G-A-T---GG-T----AG--A--ATT---C-C-A-G-       |   |   |   |   |   |   |    |    |   |   |    |    |   |   |   |   |   |    |   |    |   |   |   |   |   |   |   |   |
| GT--GT-A-G-CG-GT--G---A-A-A---TG-C-GT-AG--AG-A-TC--T-G--G-A-G-G-A-AT-A-CC---GA-T--G--GC-GAA-G--G-C-A-----G-C-C-A-T---CTG--G--CC-T-A-----A-T--A-C-T-GA--CA-C-T-G--A-GG--T-A-CG-A-AA-G-C---A-TG--GG-G--AG-C-            |   |   |   |   |   |   |    |    |   |   |    |    |   |   |   |   |   |    |   |    |   |   |   |   |   |   |   |   |
| A-AA-----CA--GG Bacteria(100);Proteobacteria(100);Gammaproteobacteria(100);Pseudomonadales(100);Moraxellaceae(100);Acinetobacter(100);unclassified(100);unclassified(100);unclassified(100);                          |   |   |   |   |   |   |    |    |   |   |    |    |   |   |   |   |   |    |   |    |   |   |   |   |   |   |   |   |
| Otu1771                                                                                                                                                                                                               | 0 | 0 | 0 | 0 | 0 | 0 | 0  | 0  | 0 | 0 | 0  | 0  | 0 | 3 | 0 | 0 | 0 | 0  | 0 | 0  | 0 | 0 | 0 | 0 | 0 | 0 | 0 |   |
|                                                                                                                                                                                                                       | 0 | 0 | 0 | 0 | 0 | 0 | 0  | 0  | 0 | 0 | 0  | 0  | 0 | 0 | 0 | 0 | 0 | 0  | 0 | 0  | 0 | 0 | 0 | 0 | 0 | 0 | 0 |   |
|                                                                                                                                                                                                                       | 0 | 0 | 0 | 0 | 0 | 0 | 0  | 0  | 0 | 0 | 0  | 0  | 0 | 0 | 0 | 0 | 0 | 0  | 0 | 0  | 0 | 0 | 0 | 0 | 0 | 0 | 0 |   |
|                                                                                                                                                                                                                       | 0 | 0 | 0 | 0 | 0 | 0 | 0  | 0  | 0 | 0 | 0  | 0  | 0 | 0 | 0 | 0 | 0 | 0  | 0 | 0  | 0 | 0 | 0 | 0 | 0 | 0 | 0 |   |
| M02255_76_000000000-ADUNE_1_1117_10898_24269 C---AA---CA-AA-AGA-----AGC-A-C-----C-G-G--C--TA-A-C-T-CC-----GT-G--C-C-AG-CA-----GC-C---GC-G--GT-AA-----T-AC-G-G-A-G-----G--G-TG-C-A-A-----                              |   |   |   |   |   |   |    |    |   |   |    |    |   |   |   |   |   |    |   |    |   |   |   |   |   |   |   |   |
| ----GC---G-T-T-A-----G-A-T-C--GG--A-AA-TC--C-C-CG-G-G----CT-T-AA-----C-C-T-G-G-G-A-A-T---G-G-C-A--T-C-----T-AA-A-A--C-----T--G-G--TC-A-G-C---T-A-G-A-G-T-C---T-TG---TA-G-A-----G-G-G-G---GG-T----AG--A--ATT---C-      |   |   |   |   |   |   |    |    |   |   |    |    |   |   |   |   |   |    |   |    |   |   |   |   |   |   |   |   |
| C-A-T-GT--GT-A-G-CG-GT--G---A-A-A---TG-C-GT-AG--AG-A-TG--T-G--G-A-G-G-A-AT-A-CC---GG--T--G--GC-GAA-G--G-C-G-----G--C-C-C-C---CTG--G--AC-A-A-----A-G---A-C-T-GA--CG-C-T-C--A-GG--T-G-CG-A-AA-G-C---G-TG--GG-           |   |   |   |   |   |   |    |    |   |   |    |    |   |   |   |   |   |    |   |    |   |   |   |   |   |   |   |   |
| G--AG-C-A-AA-----CA--GG Bacteria(100);Proteobacteria(100);Gammaproteobacteria(100);Enterobacteriales(100);Enterobacteriaceae(100);unclassified(100);unclassified(100);unclassified(100);unclassified(100);            |   |   |   |   |   |   |    |    |   |   |    |    |   |   |   |   |   |    |   |    |   |   |   |   |   |   |   |   |
| Otu1772                                                                                                                                                                                                               | 0 | 0 | 0 | 0 | 0 | 0 | 10 | 0  | 0 | 0 | 0  | 0  | 0 | 0 | 0 | 0 | 0 | 0  | 0 | 0  | 0 | 0 | 0 | 0 | 0 | 0 | 0 |   |
|                                                                                                                                                                                                                       | 0 | 0 | 0 | 0 | 0 | 0 | 0  | 0  | 0 | 0 | 0  | 0  | 0 | 0 | 0 | 0 | 0 | 0  | 0 | 0  | 0 | 0 | 0 | 0 | 0 | 0 | 0 |   |
|                                                                                                                                                                                                                       | 0 | 0 | 0 | 0 | 0 | 0 | 0  | 0  | 0 | 0 | 0  | 0  | 0 | 0 | 0 | 0 | 0 | 0  | 0 | 0  | 0 | 0 | 0 | 0 | 0 | 0 | 0 |   |
|                                                                                                                                                                                                                       | 0 | 0 | 0 | 0 | 0 | 0 | 0  | 0  | 0 | 0 | 0  | 0  | 0 | 0 | 0 | 0 | 0 | 0  | 0 | 0  | 0 | 0 | 0 | 0 | 0 | 0 | 0 |   |
| M02255_77_000000000-ADUT3_1_1116_8002_4121 T---AC---GT-AG-GGG-----GCA-A-G-----C-G-T---T--AT-C-CGG-AT-----TT-A--C-T-GG-GT-----GT-A---AA-GG-GA-GC-----G-CA-G-G-T-G-----G--C-AA-G-G-C-----                               |   |   |   |   |   |   |    |    |   |   |    |    |   |   |   |   |   |    |   |    |   |   |   |   |   |   |   |   |
| AA---G-C-C-A-----G-A-A-G--TG--A-AA-AC--C-C-GG-G-G----CT-T-AA-----C-C-C-C-GTG-G--A-T---T-G-C-T---T-T-----T--GG-A-A--C-----T--G-T-CT--G-G-C---T-A-G-A-G-T-G---C-AG---GA-G-G-----G-G-C-A--GG-C-----GG--A--ATT---C-C-     |   |   |   |   |   |   |    |    |   |   |    |    |   |   |   |   |   |    |   |    |   |   |   |   |   |   |   |   |
| T-A-GT--GT-A-G-CG-GT--G---A-A-A---TG-C-GT-AG--AT-A-TT--A-G--G-A-G-G-A-AC-A-CC---GG--T--G--GC-GAA-G--G-C-G-----G--C-C-T-G---CTG--G--AC-T-G-----T-A--A-C-T-GA--CA-C-T-G--A-GG--C-T-CG-A-AA-G-C---G-TG--GG-G--           |   |   |   |   |   |   |    |    |   |   |    |    |   |   |   |   |   |    |   |    |   |   |   |   |   |   |   |   |
| AG-C-A-AA-----CA--GG Bacteria(100);Firmicutes(100);Clostridia(100);Clostridiales(100);Lachnospiraceae(100);unclassified(100);unclassified(100);unclassified(100);unclassified(100);                                   |   |   |   |   |   |   |    |    |   |   |    |    |   |   |   |   |   |    |   |    |   |   |   |   |   |   |   |   |
| Otu1773                                                                                                                                                                                                               | 0 | 0 | 0 | 0 | 0 | 0 | 1  | 28 | 0 | 0 | 0  | 0  | 0 | 0 | 0 | 0 | 0 | 0  | 0 | 0  | 0 | 0 | 0 | 0 | 0 | 0 | 0 |   |
|                                                                                                                                                                                                                       | 0 | 0 | 0 | 0 | 0 | 0 | 0  | 0  | 0 | 0 | 0  | 0  | 0 | 0 | 0 | 0 | 0 | 0  | 0 | 0  | 0 | 0 | 0 | 0 | 0 | 0 | 0 |   |
|                                                                                                                                                                                                                       | 0 | 0 | 0 | 0 | 0 | 0 | 0  | 0  | 0 | 0 | 0  | 0  | 0 | 0 | 0 | 0 | 0 | 0  | 0 | 0  | 0 | 0 | 0 | 0 | 0 | 0 | 0 |   |
|                                                                                                                                                                                                                       | 0 | 0 | 0 | 0 | 0 | 0 | 0  | 0  | 0 | 0 | 0  | 0  | 0 | 0 | 0 | 0 | 0 | 0  | 0 | 0  | 0 | 0 | 0 | 0 | 0 | 0 | 0 |   |
| M02255_76_000000000-ADUNE_1_1116_16772_6211 .....AC---T-AC-GT-----GCC-A-G-----C--A-G--C--CG-C-GGT-AA-----TA-C-G-T-AG-GT-----GG--C---AA-GC-G--TT-----G-TC-C-G---G-----A-T-CT-T-T-T-----AA---G-                         |   |   |   |   |   |   |    |    |   |   |    |    |   |   |   |   |   |    |   |    |   |   |   |   |   |   |   |   |
| T-C-T-----G-A-T--G--TG--A-AA-GC--C-T-TC-G-G----CT-T-AA-----C-C-G-G-A-G-A-A-G---T-G--C-A--T-C-----G--GA-A-A--C-----T--G-G--GA--G-A-C---T-T-G-A-G-T-G---C-AG---AA-G-A-----G-G-A-C--AG-T-----GG--A--ACT---C-C-A-T-GT--   |   |   |   |   |   |   |    |    |   |   |    |    |   |   |   |   |   |    |   |    |   |   |   |   |   |   |   |   |
| GT-A-G-CG-GT--G---A-A-A---TG-C-GT-AG--AT-A-TA--T-G--G-A-A-G-A-AC-A-CC---AG--T--G--GC-GAA-G--G-C-G-----G--C-T-G-T---CTG--G--TC-T-G-----T-A--A-C-T-GA--CG-C-T-G--A-GG--C-T-CG-A-AA-G-T---A-TG--GG-T--AG-C-A-            |   |   |   |   |   |   |    |    |   |   |    |    |   |   |   |   |   |    |   |    |   |   |   |   |   |   |   |   |
| AA-----CA--GG Bacteria(100);Firmicutes(100);Bacilli(100);Lactobacillales(100);Lactobacillaceae(100);Lactobacillus(100);unclassified(100);unclassified(100);unclassified(100);                                         |   |   |   |   |   |   |    |    |   |   |    |    |   |   |   |   |   |    |   |    |   |   |   |   |   |   |   |   |
| Otu1774                                                                                                                                                                                                               | 8 | 0 | 0 | 0 | 0 | 0 | 0  | 0  | 0 | 0 | 0  | 0  | 0 | 0 | 0 | 0 | 0 | 0  | 0 | 0  | 0 | 0 | 0 | 0 | 0 | 0 | 3 |   |
|                                                                                                                                                                                                                       | 0 | 0 | 0 | 0 | 0 | 0 | 0  | 0  | 0 | 0 | 0  | 0  | 0 | 0 | 0 | 0 | 0 | 0  | 0 | 0  | 0 | 0 | 0 | 0 | 0 | 0 | 0 |   |
|                                                                                                                                                                                                                       | 0 | 0 | 0 | 0 | 0 | 0 | 0  | 0  | 0 | 0 | 0  | 0  | 0 | 0 | 0 | 0 | 0 | 0  | 0 | 0  | 0 | 0 | 0 | 0 | 0 | 0 | 0 |   |
|                                                                                                                                                                                                                       | 0 | 0 | 0 | 0 | 0 | 0 | 0  | 0  | 0 | 0 | 0  | 0  | 0 | 0 | 0 | 0 | 0 | 0  | 0 | 0  | 0 | 0 | 0 | 0 | 0 | 0 | 0 |   |
| M02255_76_000000000-ADUNE_1_2119_12624_16976 .....AC---T-CT-GT-----GCC-A-G-----C-----A--G--CC-G-CGG-TA-----AT-A--C-A--GA-G-----GT--G---GC-AA-GC-G-----T-TG-T-T-C-G-----G--A-CT-T-C-T-----                             |   |   |   |   |   |   |    |    |   |   |    |    |   |   |   |   |   |    |   |    |   |   |   |   |   |   |   |   |
| AA---G-T-C-A-----G-A-C--G--TG--A-AA-TC--C-C-CC-G-G----CT-T-AA-----C-C-T-G-G-G-A-A-C---T-G--C-G---T-C-----T--GA-T-A--C-----T--G-G--GA--G-G-C---T-T-G-A-G-T-A--T-GG----GA-G-A-----G-G-G-A--TG-T-----AG--A--ATT---C-C-A- |   |   |   |   |   |   |    |    |   |   |    |    |   |   |   |   |   |    |   |    |   |   |   |   |   |   |   |   |
| G-GT--GT-A-G-CG-GT--G---A-A-A---TG-C-GT-AG--AT-A-TC--T-G--G-A-G-G-A-AT-A-CC---GG--T--G--GC-GAA-G--G-C-G-----G--C-A-T-C---CTG--G--AC-C-A-----T-A--A-C-T-GA--CG-C-T-G--A-GG--C-G-CG-A-AA-G-C---T-AG--GG-G--             |   |   |   |   |   |   |    |    |   |   |    |    |   |   |   |   |   |    |   |    |   |   |   |   |   |   |   |   |
| AG-C-A-AA-----CG--GG Bacteria(100);Acidobacteria(100);Acidobacteria(100);Acidobacteriales(100);Acidobacteriaceae(100);uncultured(100);unclassified(100);unclassified(100);unclassified(100);                          |   |   |   |   |   |   |    |    |   |   |    |    |   |   |   |   |   |    |   |    |   |   |   |   |   |   |   |   |



|                                                                                                                                                                                                                                                                                                                                                                                                                                                                                                                                                                                                                                                                                                                                                                                                                                                              |     |   |   |    |   |   |   |    |   |   |   |   |   |   |   |   |   |   |   |   |   |   |   |   |   |   |   |
|--------------------------------------------------------------------------------------------------------------------------------------------------------------------------------------------------------------------------------------------------------------------------------------------------------------------------------------------------------------------------------------------------------------------------------------------------------------------------------------------------------------------------------------------------------------------------------------------------------------------------------------------------------------------------------------------------------------------------------------------------------------------------------------------------------------------------------------------------------------|-----|---|---|----|---|---|---|----|---|---|---|---|---|---|---|---|---|---|---|---|---|---|---|---|---|---|---|
| Otu1775                                                                                                                                                                                                                                                                                                                                                                                                                                                                                                                                                                                                                                                                                                                                                                                                                                                      | 247 | 0 | 0 | 0  | 0 | 0 | 0 | 0  | 0 | 0 | 0 | 0 | 0 | 0 | 0 | 0 | 0 | 0 | 0 | 0 | 0 | 0 | 0 | 0 | 0 | 0 | 0 |
|                                                                                                                                                                                                                                                                                                                                                                                                                                                                                                                                                                                                                                                                                                                                                                                                                                                              | 0   | 0 | 0 | 0  | 0 | 0 | 0 | 0  | 0 | 0 | 0 | 0 | 0 | 0 | 0 | 0 | 0 | 0 | 0 | 0 | 0 | 0 | 0 | 0 | 0 | 0 | 0 |
|                                                                                                                                                                                                                                                                                                                                                                                                                                                                                                                                                                                                                                                                                                                                                                                                                                                              | 0   | 0 | 0 | 0  | 0 | 0 | 0 | 0  | 0 | 0 | 0 | 0 | 0 | 0 | 0 | 0 | 0 | 0 | 0 | 0 | 0 | 0 | 0 | 0 | 0 | 0 | 0 |
|                                                                                                                                                                                                                                                                                                                                                                                                                                                                                                                                                                                                                                                                                                                                                                                                                                                              | 0   | 0 | 0 | 0  | 0 | 0 | 0 | 0  | 0 | 0 | 0 | 0 | 0 | 0 | 0 | 0 | 0 | 0 | 0 | 0 | 0 | 0 | 0 | 0 | 0 | 0 | 0 |
| M02255_77_000000000-ADUT3_1_1102_11814_8362 T---AC---GG-AG-GGG-----GCT-A-G-----C--G--T---T-GT-T-CGG-AA-----TT-A--C-T--GG-GC-----GT--A----AA-GC-GC-AC-----G-TA-G-G-C-G-----G--C-TT-T-G-T-----AA-<br>---G-T-T-A-----G-A-G--G--TG--A-AA-GC--C-T-GG-T-G----CT-C-AA-----C-A-T-C-A-G-A-A-C---T-G--C-C---T--T-----T--AA-G-A--C-----T--G-C--AT--C-G-C---T-T-G-A-A-T--C---A-TG----GA-G-A-----G-G-T-G--GG-T-----GG--A--ATT---C-C-G-A-<br>GT--GT-A-G-AG-GT--G---A--A-A---TT-C-GT-AG--AT-A-TT--C-G--G-A-A-G-A-AC-A-CC---AG--T--G--GC-GAA-G--G-C--G-----G--C-C-C-A---CTG--G--AC-A-T-----G-T---A-T-T--GA--CG-C-T-G--A-GG--T-G-CG-A--AA-G-C---G-TG--GG-G--AG-<br>C-A-AA-----CA--GG Bacteria(100);Proteobacteria(100);Alphaproteobacteria(100);Sphingomonadales(100);Sphingomonadaceae(100);Sphingomonas(100);unclassified(100);unclassified(100);unclassified(100);         |     |   |   |    |   |   |   |    |   |   |   |   |   |   |   |   |   |   |   |   |   |   |   |   |   |   |   |
| Otu1776                                                                                                                                                                                                                                                                                                                                                                                                                                                                                                                                                                                                                                                                                                                                                                                                                                                      | 0   | 0 | 0 | 0  | 0 | 0 | 4 | 52 | 0 | 0 | 0 | 0 | 0 | 0 | 0 | 0 | 0 | 0 | 0 | 0 | 0 | 0 | 0 | 0 | 0 | 0 | 0 |
|                                                                                                                                                                                                                                                                                                                                                                                                                                                                                                                                                                                                                                                                                                                                                                                                                                                              | 0   | 0 | 0 | 0  | 0 | 0 | 0 | 0  | 0 | 0 | 0 | 0 | 0 | 0 | 0 | 0 | 0 | 0 | 0 | 0 | 0 | 0 | 0 | 0 | 0 | 0 | 0 |
|                                                                                                                                                                                                                                                                                                                                                                                                                                                                                                                                                                                                                                                                                                                                                                                                                                                              | 0   | 0 | 0 | 0  | 0 | 0 | 0 | 0  | 0 | 0 | 0 | 0 | 0 | 0 | 0 | 0 | 0 | 0 | 0 | 0 | 0 | 0 | 0 | 0 | 0 | 0 | 0 |
|                                                                                                                                                                                                                                                                                                                                                                                                                                                                                                                                                                                                                                                                                                                                                                                                                                                              | 0   | 0 | 0 | 0  | 0 | 0 | 0 | 0  | 0 | 0 | 0 | 0 | 0 | 0 | 0 | 0 | 0 | 0 | 0 | 0 | 0 | 0 | 0 | 0 | 0 | 0 | 0 |
| M02255_77_000000000-ADUT3_1_2107_12933_15940 T---AC---GT-AG-GGT-----CCG-A-G-----C--G--T---T-GT-C-CGG-AA-----TT-A--T-T--GG-GC-----GT--A----AA-GG-GC-TC-----G-TA-G-G-C-G-----G--T-TT-G-T-C-----<br>----GC---G-T-C-G-----G-G-A--G--TG--A-AA-AC--C-T-AC-A-G-----CT-T-AA-----C-T-G-T-G-G-G--C-T---T-G--C-T---T--T-----C--GA-T-A--C-----G--G-G--CA--G-A-C---T-T-G-A-G-G--C---A-TG----CA-G-G-----G-G-A-G--AA-C-----GG--A--ATT---C-<br>C-T-G-GT--GT-A-G-CG-GT--G---A--A-A---TG-C-GC-AG--AT-A-TC--A-G--G-A-G-G-A-AC-A-CC---GG--T--G--GC-GAA-G--G-C--G-----G--T-T-C-T---CTG--G--GC-A-T-----G-T---T-C-T--GA--CG-C-T-G--A-GG--A-G-CG-A--AA-G-T---G-TG--GG-<br>G--AG-C-G-AA-----CA--GG Bacteria(100);Actinobacteria(100);Actinobacteria(100);Actinobacteridae(100);Actinomycetales(100);Propionibacterineae(100);Nocardiodaceae(100);Nocardioides(100);unclassified(100); |     |   |   |    |   |   |   |    |   |   |   |   |   |   |   |   |   |   |   |   |   |   |   |   |   |   |   |
| Otu1777                                                                                                                                                                                                                                                                                                                                                                                                                                                                                                                                                                                                                                                                                                                                                                                                                                                      | 0   | 0 | 0 | 0  | 0 | 0 | 0 | 0  | 0 | 0 | 0 | 0 | 0 | 0 | 7 | 0 | 0 | 0 | 0 | 0 | 0 | 0 | 0 | 0 | 0 | 0 | 0 |
|                                                                                                                                                                                                                                                                                                                                                                                                                                                                                                                                                                                                                                                                                                                                                                                                                                                              | 0   | 0 | 0 | 0  | 0 | 0 | 0 | 0  | 0 | 0 | 0 | 0 | 0 | 0 | 0 | 0 | 0 | 0 | 0 | 0 | 0 | 0 | 0 | 0 | 0 | 0 | 0 |
|                                                                                                                                                                                                                                                                                                                                                                                                                                                                                                                                                                                                                                                                                                                                                                                                                                                              | 0   | 0 | 0 | 0  | 0 | 0 | 0 | 0  | 0 | 0 | 0 | 0 | 0 | 0 | 0 | 0 | 0 | 0 | 0 | 0 | 0 | 0 | 0 | 0 | 0 | 0 | 0 |
|                                                                                                                                                                                                                                                                                                                                                                                                                                                                                                                                                                                                                                                                                                                                                                                                                                                              | 0   | 0 | 0 | 0  | 0 | 0 | 0 | 0  | 0 | 0 | 0 | 0 | 0 | 0 | 0 | 0 | 0 | 0 | 0 | 0 | 0 | 0 | 0 | 0 | 0 | 0 | 0 |
| M02255_77_000000000-ADUT3_1_1113_11285_15948 T---AC---GT-AG-GTG-----GCG-A-G-----C--G--T---T-GT-C-CGG-AA-----TT-A--C-T--GG-GT-----GT--A----AA-GG-GT-GC-----G-TA-G-G-C-G-----G--C-TA-A-T-T-----<br>-----AA---G-T-T-A-----G-T-T--G--TG--A-AA-AC--C-T-TA-G-G-----CT-C-AA-----C-T-T-A-A-G-G--A-G---T-G--C-A--A-C-----T--AA-A-A--C-----T--G-G--GT--A-G-C---T-A-G-A-G-T--G---C-AG----GA-G-A-----G-G-A-T---GA-C-----GG--A--ATT---C-<br>C-C-G-GA--GT-A-G-CG-GT--G---A--A-A---TG-C-GT-AG--AT-A-TC--G-G--G-A-G-G-A-AC-A-CC---AG--T--G--GC-GAA-G--G-C--G-----G--T-C-A-T---CTG--G--AC-T-G-----T-A---A-C-T--GA--CG-C-T-G--A-GG--C-A-CG-A--AA-G-C---G-TG--GG-<br>G--AG-C-A-AA-----CA--GG Bacteria(100);unclassified(100);unclassified(100);unclassified(100);unclassified(100);unclassified(100);unclassified(100);unclassified(100);unclassified(100);                     |     |   |   |    |   |   |   |    |   |   |   |   |   |   |   |   |   |   |   |   |   |   |   |   |   |   |   |
| Otu1778                                                                                                                                                                                                                                                                                                                                                                                                                                                                                                                                                                                                                                                                                                                                                                                                                                                      | 0   | 0 | 0 | 0  | 0 | 0 | 0 | 1  | 0 | 0 | 0 | 0 | 0 | 0 | 0 | 0 | 0 | 0 | 0 | 0 | 0 | 0 | 0 | 0 | 0 | 0 | 0 |
|                                                                                                                                                                                                                                                                                                                                                                                                                                                                                                                                                                                                                                                                                                                                                                                                                                                              | 0   | 4 | 1 | 0  | 0 | 0 | 1 | 0  | 0 | 6 | 0 | 0 | 0 | 0 | 1 | 0 | 0 | 0 | 0 | 5 | 0 | 0 | 3 | 0 | 0 | 0 | 0 |
|                                                                                                                                                                                                                                                                                                                                                                                                                                                                                                                                                                                                                                                                                                                                                                                                                                                              | 0   | 0 | 0 | 0  | 0 | 0 | 0 | 0  | 0 | 0 | 0 | 0 | 0 | 0 | 9 | 0 | 0 | 0 | 0 | 0 | 0 | 0 | 0 | 0 | 8 | 0 | 7 |
|                                                                                                                                                                                                                                                                                                                                                                                                                                                                                                                                                                                                                                                                                                                                                                                                                                                              | 0   | 2 | 0 | 0  | 2 | 0 | 0 | 0  | 0 | 0 | 0 | 0 | 0 | 0 | 0 | 0 | 0 | 0 | 2 | 0 | 0 | 0 | 0 | 1 | 0 | 0 | 0 |
| M02255_76_000000000-ADUNE_1_1105_9936_6260 T---AA---CT-AC-GTG-----CC--A-G-----C--A--G---C--CG-C-GGT-AA-----TA-C--G-T--AG-----GT--C---CC-GA-GC-G-----T-TG-T-C-C-G-----G--T-TA-G-A-T-----AA---<br>G-T-C-T-----G-A-A--G--TT--A-AA-GG--C-T-GT-G-G----CT-T-AA-----C-C-A-T-A-G-T-A-----T-G--C-T---T--T-----G--GA-A-A--C-----T--G-T--TT--A-A-C---T-T-G-A-G-T--G---C-AG----AA-G-G-----G-G-A-G--AG-T-----GG--A--ATT---C-C-A-T-GT--<br>GT-A-G-CG-GT--G---A--A-A---TG-C-GT-AG--AT-A-TA--T-G--G-A-G-G-A-AC-A-CC---GG--T--G--GC-GAA-A--G-C--G-----G--C-T-C-T---CTG--G--TC-T-G-----T-A---A-C-T--GA--CG-C-T-G--A-GG--C-T-CG-A--AA-G-C---G-TG--GG-G--AG-C-A-<br>AA-----CA--GG Bacteria(100);Firmicutes(100);Bacilli(100);Lactobacillales(100);Streptococcaceae(100);Streptococcus(100);unclassified(100);unclassified(100);unclassified(100);                                |     |   |   |    |   |   |   |    |   |   |   |   |   |   |   |   |   |   |   |   |   |   |   |   |   |   |   |
| Otu1779                                                                                                                                                                                                                                                                                                                                                                                                                                                                                                                                                                                                                                                                                                                                                                                                                                                      | 0   | 0 | 0 | 20 | 0 | 0 | 0 | 0  | 0 | 0 | 0 | 0 | 0 | 0 | 0 | 0 | 0 | 0 | 0 | 0 | 0 | 0 | 0 | 0 | 0 | 0 | 0 |
|                                                                                                                                                                                                                                                                                                                                                                                                                                                                                                                                                                                                                                                                                                                                                                                                                                                              | 0   | 0 | 0 | 0  | 0 | 0 | 0 | 0  | 0 | 0 | 0 | 0 | 0 | 0 | 0 | 0 | 0 | 0 | 0 | 0 | 0 | 0 | 0 | 0 | 0 | 0 | 0 |
|                                                                                                                                                                                                                                                                                                                                                                                                                                                                                                                                                                                                                                                                                                                                                                                                                                                              | 0   | 0 | 0 | 0  | 0 | 0 | 0 | 0  | 0 | 0 | 0 | 0 | 0 | 0 | 0 | 0 | 0 | 0 | 0 | 0 | 0 | 0 | 0 | 0 | 0 | 0 | 0 |
|                                                                                                                                                                                                                                                                                                                                                                                                                                                                                                                                                                                                                                                                                                                                                                                                                                                              | 0   | 0 | 0 | 0  | 0 | 0 | 0 | 0  | 0 | 0 | 0 | 0 | 0 | 0 | 0 | 0 | 0 | 0 | 0 | 0 | 0 | 0 | 0 | 0 | 0 | 0 | 0 |
| M02255_77_000000000-ADUT3_1_2115_22179_14678 T---AC---GT-AG-GGT-----GCA-A-G-----C--G--T---T-GT-C-CGG-AA-----TT-A--T-T--GG-GC-----GT--A----AA-GG-GC-TC-----G-TA-G-G-C-G-----G--T-CC-A-T-C-----<br>----GC---G-T-C-G-----G-G-A--G--TG--A-AA-AG--C-T-GG-G-G----CT-T-AA-----C-C-C-C-A-G-T--C-C---T-G--C-T---T--C-----C--GA-T-A--C-----G--G-G--TG--G-A-C---T-A-G-A-G-G--T---A-GG----TA-G-G-----G-G-A-G--AT-C-----GG--A--ATT---<br>C-C-T-G-GT--GT-A-G-CG-GT--G---A--A-A---TG-C-GC-AG--AT-A-TC--A-G--G-A-G-G-A-AC-A-CC---GG--T--G--GC-GAA-G--G-C--G-----G--A-T-C-T---CTG--G--GC-C-T-----T-A---C-C-T--GA--CG-C-T-G--A-GG--A-G-CG-A--AA-G-C---A-TG--<br>GG-G--AG-C-A-AA-----CA--GG Bacteria(100);Actinobacteria(100);Actinobacteria(100);Actinobacteridae(100);Actinomycetales(100);unclassified(100);unclassified(100);unclassified(100);unclassified(100);           |     |   |   |    |   |   |   |    |   |   |   |   |   |   |   |   |   |   |   |   |   |   |   |   |   |   |   |



Otu1780 0 0 0 7 0 0 0 0 0 0 2 0 0 0 0 0 0 0 0 0 0 0 0 0 0 0 0 0 0 0  
0 0 0 0 0 0 0 0 0 0 0 0 0 0 0 3 0 0 1 0 3 0 0 0 0 0 0 0 0  
0 0 0 0 0 0 2 2 0 0 0 0 0 0 0 0 2 0 0 0 0 0 0 0 0 0 0 0 15 0  
10 1 6 0 9 0 0 0 0 0 0 0 0 0 0 0 0 0 0 0 0 0 0 0 0 0 0 0 0  
M02255\_76\_000000000-ADUNE\_1\_2106\_24636\_9457 T---AC---GG-GG-GGG-----GCA-A-G-----T--G--T---T-CT-T-CGG-AA-----TG-A-C-T--AG-GC-----GT--A---AA-GG-GC-A-----G-T-----G-----A--A-TC-G-----G-----  
G-T-T-G-----C-A-A--G--TT--C-AA-----G-T-CG-C-C----AA-A-AA-----C-C-G-G-C-G-G--A-A---T-G--C-T--C--T-----C-GA-A-A--C-----C--A-A--TT--C-A-C---T-T-G-A-G-T--G--A-GA----CA-G-A-----G-G-A-G--AG-T-----TT--C--ATT---T-C-G-T-GT--  
GT-A-G-GG-GT--T---A--A-A---TC-C-GT-AG--AT-C-TA--C-G--A-A-G-G-A-AG-G-CC---AA--A--A-GC-GAA-G--G-C--A-----G--C-T-C-T---TTG--G--GT-C-C-----C-T---A-C-T--GA--CG-C-T-G--A-GG--T-G-CG-A--AA-G-C--A-TG--GG-G--AG-C-A-  
AA-----CT--GG Bacteria(100);unclassified(100);unclassified(100);unclassified(100);unclassified(100);unclassified(100);unclassified(100);unclassified(100);unclassified(100);

Otu1781 179 0 0 0 0 0 0 0 0 0 0 0 0 0 0 0 0 0 0 0 0 0 0 0 0 0 0 0 0  
0 0 0 0 0 0 0 0 0 0 0 0 0 0 0 0 0 0 0 0 0 39 0 0 0 0 0 0 0  
0 0 0 0 0 0 0 0 0 0 0 0 0 0 0 0 0 0 0 0 0 0 0 0 0 0 0 0 0  
0 0 0 0 0 0 0 0 0 0 0 0 0 0 0 0 0 0 0 0 0 0 0 0 0 0 0 0  
M02255\_76\_000000000-ADUNE\_1\_1103\_6563\_19350 .....AC---T-AC-GT-----GCC-A-G-----C--A--G--C--CG-C-GGT-AA-----TA-C-G-T--AG-GT-----GG--C---AA-GC---G-----T-TA-T-C-C-G-----G--T-TT-T-C-T-----AA---G-  
T-C-T-----G-A-T--G--TG--A-AA-GC--C-T-TC-G-G-----CT-T-AA-----C-C-G-A-A-G-A--A-G---T-G--C-A--T--C-----G-GA-A-A--C-----T--G-G--AT--G-A-C---T-T-G-A-G-T--G--C-AG---AA-G-A-----G-G-G-C---AG-T-----GG--A--ACT---C-C-A-T-GT--  
GT-A-G-CG-GT--G---G--A-A---TG-C-GT-AG--AT-A-TA--T-G--G-A-A-G-A-AC-A-CC---AG--T--G--GC-GAA-G--G-C--G-----G--C-T-G-C---CTG--G--TC-T-G-----T-A---A-C-T--GA--CG-C-T-G--A-GG--C-T-CG-A--AA-G-C---A-TG--GG-T--AG-C-G-  
AA-----CA--GG Bacteria(100);Firmicutes(100);Bacilli(100);Lactobacillales(100);Lactobacillaceae(100);unclassified(100);unclassified(100);unclassified(100);unclassified(100);

Otu1782 0 0 0 0 0 0 120 8 174 0 0 0 0 0 0 0 0 1 0 0 0 0 0 0 0 0 0 0  
0 0 0 0 0 0 0 0 0 0 0 0 0 0 0 0 0 0 0 0 0 0 0 0 0 0 0 0  
0 0 0 0 0 0 0 0 0 0 0 0 0 0 0 0 0 0 13 0 0 0 0 0 0 0 0 0  
0 0 0 0 0 0 0 0 0 0 0 0 0 0 0 0 0 0 0 0 0 0 0 0 4 0 0  
M02255\_77\_000000000-ADUT3\_1\_1114\_25108\_12239 T---AC---GT-AT-GGT-----GCA-A-G-----C--G--T---T--AT-C-CGG-AT-----TT-A--C-T--GG-GT-----GT--A---AA-GG-GT-GA-----G-TA-G-G-C-G-----G--T-CA-T-G-C-----  
----AA---G-T-C-A-----T-A-T--G--TG--A-AA-TG--T-C-AG-G-G-----CT-T-AA-----C-C-T-T-G-G-C--G-C---T-G--C-A--T--A-----A-GA-A-A--C-----T--G-T--AT--G-A-C---T-A-G-A-G-T--G--C-AG---GA-G-A-----G-G-T-A--AG-C-----GG--A--ATT---C-  
C-T-A-GT--GT-A-G-CG-GT--G---A--A-A---TG-C-GT-AG--AT-A-TT--A-G--G-A-A-G-A-AC-A-CC---GG--T--G--GC-GAA-G--G-C--G-----G--C-T-T-A---CTG--G--AC-T-G-----T-T---A-C-T--GA--CG-C-T-G--A-GT--C-A-CG-A--AA-G-C---G-TG--GG-G-  
-AG-C-A-AA-----CA--GG Bacteria(100);Firmicutes(100);Clostridia(100);Clostridiales(100);unclassified(100);unclassified(100);unclassified(100);unclassified(100);unclassified(100);

Otu1783 23 0 0 0 0 0 0 0 0 0 0 0 0 0 0 0 0 0 0 0 0 0 0 0 0 0 0 0 0  
0 0 0 0 0 0 0 0 0 0 0 0 0 0 0 0 0 0 0 0 0 0 0 0 0 0 0 0  
0 0 0 0 0 0 0 0 0 0 0 0 0 0 0 0 0 0 0 0 0 0 0 0 0 0 0 0  
0 0 0 0 0 0 0 0 0 0 0 0 0 0 0 0 0 0 0 0 0 0 0 0 0 0 0  
M02255\_76\_000000000-ADUNE\_1\_1106\_17885\_9326 T---AA---CT-CT-GTG-----CCA-G-C-----A--G--C---C--GC-G-GTA-AT-----AC-A--G-A--GG-TC-----C--C---AA-GC-GT--T-----G-TT-C-G---G-----A--T--T-G-G-C-----AA---  
G-T-T-C-----G-A-T--G--TG--A-AA-GC--C-C-CG-G-G-----CT-T-AA-----C-C-C-G-G-G-A--A-T---G-G--C-A--T--T-----G-GA-T-A--C-----T--G-T--TG--A-T-C---T-G-G-A-G-G--G---T-CG---GA-G-G-----G-G-G-G---AC-T-----GG--A--ATT---C-T-T-G-GT-  
-GT-A-G-CA-GT--G---A--A-A---TG-C-GT-AG--AT-A-TC--A-A--G-A-G-G-A-AC-A-CC---AG--T--G--GC-GAA-G--G-C--G-----A--G-T-C-C---CTG--G--AC-G-A-----T-A---C-C-T--GA--CA-C-T-G--A-GG--C-A-CG-A--AA-G-C---C-AA--GG-G--AG-C-A-  
AA-----CA--GG Bacteria(100);unclassified(100);unclassified(100);unclassified(100);unclassified(100);unclassified(100);unclassified(100);unclassified(100);unclassified(100);

Otu1784 0 0 0 25 0 0 0 0 0 0 0 0 0 0 0 0 0 0 0 0 0 0 0 0 0 0 0 0 0  
0 0 0 0 0 0 0 0 0 0 0 0 0 0 0 0 0 0 0 0 0 0 0 0 0 0 0 0  
0 0 0 0 0 0 0 0 0 0 0 0 0 0 0 0 0 0 0 0 0 0 0 0 0 0 0 0  
0 0 0 0 0 0 0 0 0 0 0 0 0 0 0 0 0 0 0 0 0 0 0 0 0 0 0  
M02255\_77\_000000000-ADUT3\_1\_1101\_12064\_19066 T---AC---GG-AG-GGG-----GCT-A-G-----C--G--T---T--GT-C-CGG-AA-----TT-A--C-T--GG-GC-----GT--A---AA-GC-GC-GC-----G-TA-G-G-T-G-----G--T-CT-G-C-C-----  
-----AA---G-T-C-G-----G-G-G--G--TG--A-AA-GC--C-C-GG-G-G-----CT-C-AA-----C-T-C-C-G-G-A--A-T---T-G--C-C---T--C-----C--GA-G-A--C-----T--G-G--CG--G-A-C---T-C-G-A-G-T--T---C-GG---GA-G-A-----G-G-A-G--AG-C-----GG--A--ATT---  
C-C-C-A-GT--GT-A-G-AG-GT--G---A--A-A---TT-C-GT-AG--AT-A-TT--G-G--G-A-A-G-A-AC-A-CC---GG--T--G--GC-GAA-G--G-C--G-----G--C-T-C-T---CTG--G--CC-C-G-----C-A---A-C-T--GA--CG-C-T-G--A-GG--C-G-CG-A--AA-G-C---G-TG--GG-  
G--AG-C-A-AA-----CA--GG Bacteria(100);Proteobacteria(100);Alphaproteobacteria(100);unclassified(100);unclassified(100);unclassified(100);unclassified(100);unclassified(100);unclassified(100);



|         |                                                                                                                                                                                                                           |   |   |   |   |   |   |     |   |   |   |   |   |                                                                                                                                                |   |   |   |   |   |    |   |   |   |   |   |   |    |  |
|---------|---------------------------------------------------------------------------------------------------------------------------------------------------------------------------------------------------------------------------|---|---|---|---|---|---|-----|---|---|---|---|---|------------------------------------------------------------------------------------------------------------------------------------------------|---|---|---|---|---|----|---|---|---|---|---|---|----|--|
| Otu1785 | 0                                                                                                                                                                                                                         | 0 | 0 | 0 | 0 | 0 | 0 | 0   | 0 | 0 | 0 | 4 | 0 | 0                                                                                                                                              | 0 | 0 | 0 | 0 | 0 | 0  | 0 | 0 | 0 | 0 | 0 | 0 | 42 |  |
|         | 0                                                                                                                                                                                                                         | 0 | 0 | 0 | 0 | 0 | 0 | 0   | 0 | 0 | 0 | 0 | 0 | 0                                                                                                                                              | 0 | 0 | 0 | 0 | 0 | 0  | 0 | 0 | 0 | 0 | 0 | 0 |    |  |
|         | 0                                                                                                                                                                                                                         | 0 | 0 | 0 | 0 | 0 | 0 | 0   | 0 | 0 | 0 | 0 | 0 | 0                                                                                                                                              | 0 | 0 | 0 | 0 | 0 | 0  | 0 | 0 | 0 | 0 | 0 | 0 |    |  |
|         | 0                                                                                                                                                                                                                         | 0 | 0 | 0 | 0 | 0 | 0 | 0   | 0 | 0 | 0 | 0 | 0 | 0                                                                                                                                              | 0 | 0 | 0 | 0 | 0 | 0  | 0 | 0 | 0 | 0 | 0 |   |    |  |
|         | M02255_77_000000000-ADUT3_1_1111_26189_19434                                                                                                                                                                              |   |   |   |   |   |   |     |   |   |   |   |   | T---AC---GG-AG-GGG-----GCT-A-G-----C-G--T--T--GT-T-CGG-AA-----TT-A--C-T--GG-GC-----GT-A----AA-GC-GC-GC-----G-TA-G-G-C-G-----G--C-TT-T-G-T----- |   |   |   |   |   |    |   |   |   |   |   |   |    |  |
|         | -----AA---G-T-C-A-----G-A-G--G--TG--A-AA-GC--C-T-GG-A-G----CT-C-AA-----C-T-C-C-A-G-A--A-C---T-G--C-C---T-T-----T-GA-G-A--C-----T-G-C-AT--C-G-C---T-T-G-A-A-T--C---A-TG-----GA-G-A-----G-G-T-T--AG-T-----GG--A--ATT---C-   |   |   |   |   |   |   |     |   |   |   |   |   |                                                                                                                                                |   |   |   |   |   |    |   |   |   |   |   |   |    |  |
|         | C-G-A-GT--GT-A-G-AG-GT--G---A--A-A---TT-C-GT-AG--AT-A-TT--C-G--G-A-A-G-A-AC-A-CC---AG--T--G--GC-GAA-G--G-C-G-----A--C-T-A-A---CTG--G--AC-A-T-----G-T---A-T-T--GA--CG-C-T-G--A-GG--T-G-CG-A--AA-G-C---G-TG--GG-G-          |   |   |   |   |   |   |     |   |   |   |   |   |                                                                                                                                                |   |   |   |   |   |    |   |   |   |   |   |   |    |  |
|         | -AG-C-A-AA-----CA--GG      Bacteria(100);Proteobacteria(100);Alphaproteobacteria(100);Sphingomonadales(100);unclassified(100);unclassified(100);unclassified(100);unclassified(100);unclassified(100);                    |   |   |   |   |   |   |     |   |   |   |   |   |                                                                                                                                                |   |   |   |   |   |    |   |   |   |   |   |   |    |  |
| Otu1786 | 0                                                                                                                                                                                                                         | 0 | 0 | 0 | 0 | 0 | 0 | 0   | 0 | 0 | 0 | 0 | 0 | 4                                                                                                                                              | 0 | 0 | 0 | 0 | 0 | 0  | 0 | 0 | 0 | 0 | 0 | 0 |    |  |
|         | 0                                                                                                                                                                                                                         | 0 | 0 | 0 | 0 | 0 | 0 | 0   | 0 | 0 | 0 | 0 | 0 | 0                                                                                                                                              | 0 | 0 | 0 | 0 | 0 | 0  | 0 | 0 | 0 | 0 | 0 | 0 |    |  |
|         | 0                                                                                                                                                                                                                         | 0 | 0 | 0 | 0 | 0 | 0 | 0   | 0 | 0 | 0 | 0 | 0 | 0                                                                                                                                              | 0 | 0 | 0 | 0 | 0 | 0  | 0 | 0 | 0 | 0 | 0 | 0 |    |  |
|         | 0                                                                                                                                                                                                                         | 0 | 0 | 0 | 0 | 0 | 0 | 0   | 0 | 0 | 0 | 0 | 0 | 0                                                                                                                                              | 0 | 0 | 0 | 0 | 0 | 0  | 0 | 0 | 0 | 0 | 0 | 0 |    |  |
|         | M02255_77_000000000-ADUT3_1_1113_23507_11947                                                                                                                                                                              |   |   |   |   |   |   |     |   |   |   |   |   | T---AC---GT-AG-GCA-----GCA-A-G-----C-G--T--T--GT-T-CGG-AG-----TT-A--C-T--GG-GC-----GT-A----AA-GG-GT-GT-----G-TA-G-G-C-G-----G--C-CT-T-C-T----- |   |   |   |   |   |    |   |   |   |   |   |   |    |  |
|         | -----AA---G-T-T-T-----G-G-T--G--TG--A-AA-TC--T-C-CC-G-G----CT-C-AA-----C-C-G-G-G-A-G--G-G---T-G--C-G---C-C-----G-AA-G-A--C-----T-G-G--GG--G-G-C---T-A-G-A-G-T-A--T-GG-----GA-T-G-----G-G-A-G--AG-T-----AG--A--ATT---      |   |   |   |   |   |   |     |   |   |   |   |   |                                                                                                                                                |   |   |   |   |   |    |   |   |   |   |   |   |    |  |
|         | C-C-C-G-GT--GT-A-G-CG-GT--G---A--A-A---TG-C-GT-AG--AT-A-TC--G-G--G-A-G-G-A-AT-A-CC---TG--T--G--GT-GTA-G--A-C--G-----G--C-T-C-T---CTG--G--AC-C-A-----T-A---A-C-T--GA--CG-C-T-G--A-GA--C-A-CG-A--AA-G-C---G-TG--GG-         |   |   |   |   |   |   |     |   |   |   |   |   |                                                                                                                                                |   |   |   |   |   |    |   |   |   |   |   |   |    |  |
|         | T--AG-C-A-AA-----CA--GG      Bacteria(100);Acidobacteria(100);Acidobacteria(100);Acidobacteriales(100);Acidobacteriaceae(100);unclassified(100);unclassified(100);unclassified(100);unclassified(100);                    |   |   |   |   |   |   |     |   |   |   |   |   |                                                                                                                                                |   |   |   |   |   |    |   |   |   |   |   |   |    |  |
| Otu1787 | 0                                                                                                                                                                                                                         | 0 | 0 | 0 | 0 | 0 | 0 | 109 | 0 | 0 | 0 | 0 | 0 | 0                                                                                                                                              | 0 | 0 | 0 | 0 | 0 | 0  | 0 | 0 | 0 | 0 | 0 | 0 |    |  |
|         | 0                                                                                                                                                                                                                         | 0 | 0 | 0 | 0 | 0 | 0 | 0   | 0 | 0 | 0 | 0 | 0 | 0                                                                                                                                              | 0 | 0 | 0 | 0 | 0 | 0  | 0 | 0 | 0 | 0 | 0 | 0 |    |  |
|         | 0                                                                                                                                                                                                                         | 0 | 0 | 0 | 0 | 0 | 0 | 0   | 0 | 0 | 0 | 0 | 0 | 0                                                                                                                                              | 0 | 0 | 0 | 0 | 0 | 0  | 0 | 3 | 0 | 0 | 0 | 0 |    |  |
|         | 0                                                                                                                                                                                                                         | 0 | 0 | 0 | 0 | 0 | 0 | 0   | 0 | 0 | 0 | 0 | 0 | 0                                                                                                                                              | 0 | 0 | 0 | 0 | 0 | 0  | 0 | 0 | 0 | 0 | 0 |   |    |  |
|         | M02255_77_000000000-ADUT3_1_1114_12150_22676                                                                                                                                                                              |   |   |   |   |   |   |     |   |   |   |   |   | T---AC---GG-AG-GGG-----GCT-A-G-----C-G--T--T--AT-T-CGG-AA-----TT-A--C-T--GG-GC-----GT-A----AA-GC-GC-GC-----G-TA-G-G-C-G-----G--T-TT-T-T-C----- |   |   |   |   |   |    |   |   |   |   |   |   |    |  |
|         | -----AA---G-T-C-A-----G-A-G--G--TG--A-AA-GC--C-C-GG-A-G----CT-C-AA-----C-T-C-C-G-G-A--A-T---T-G--C-C---T-T-----T-GA-A-A--C-----T-G-G--AT--C-A-C---T-A-G-A-A-T--C---A-TG-----GA-G-A-----G-G-T-C---AG-T-----GG--A--ATT---C- |   |   |   |   |   |   |     |   |   |   |   |   |                                                                                                                                                |   |   |   |   |   |    |   |   |   |   |   |   |    |  |
|         | C-G-A-GT--GT-A-G-AG-GT--G---A--A-A---TT-C-GT-AG--AT-A-TT--C-G--G-A-A-G-A-AC-A-CC---AG--T--G--GC-GAA-G--G-C-G-----A--C-T-G-A---CTG--G--AC-A-T-----G-T---A-T-T--GA--CG-C-T-G--A-GG--T-G-CG-A--AA-G-C---G-TG--GG-            |   |   |   |   |   |   |     |   |   |   |   |   |                                                                                                                                                |   |   |   |   |   |    |   |   |   |   |   |   |    |  |
|         | G--AG-C-A-AA-----CA--GG      Bacteria(100);Proteobacteria(100);Alphaproteobacteria(100);Sphingomonadales(100);unclassified(100);unclassified(100);unclassified(100);unclassified(100);unclassified(100);                  |   |   |   |   |   |   |     |   |   |   |   |   |                                                                                                                                                |   |   |   |   |   |    |   |   |   |   |   |   |    |  |
| Otu1788 | 83                                                                                                                                                                                                                        | 0 | 0 | 0 | 0 | 0 | 0 | 0   | 0 | 0 | 0 | 0 | 0 | 0                                                                                                                                              | 0 | 0 | 0 | 0 | 0 | 0  | 0 | 0 | 0 | 0 | 0 | 0 |    |  |
|         | 0                                                                                                                                                                                                                         | 0 | 0 | 0 | 0 | 0 | 0 | 0   | 0 | 0 | 0 | 0 | 0 | 0                                                                                                                                              | 0 | 0 | 0 | 0 | 0 | 0  | 0 | 0 | 0 | 0 | 0 | 0 |    |  |
|         | 0                                                                                                                                                                                                                         | 0 | 0 | 0 | 0 | 0 | 0 | 0   | 0 | 0 | 0 | 0 | 0 | 0                                                                                                                                              | 0 | 0 | 0 | 0 | 0 | 0  | 0 | 0 | 0 | 0 | 0 | 0 |    |  |
|         | 0                                                                                                                                                                                                                         | 0 | 0 | 0 | 0 | 0 | 0 | 0   | 0 | 0 | 0 | 0 | 0 | 0                                                                                                                                              | 0 | 0 | 0 | 0 | 0 | 0  | 0 | 0 | 0 | 0 | 0 | 0 |    |  |
|         | M02255_77_000000000-ADUT3_1_1106_21795_20599                                                                                                                                                                              |   |   |   |   |   |   |     |   |   |   |   |   | T---AC---GT-AG-GGC-----GCA-A-G-----C-G--T--T--AT-C-CGG-AA-----TT-A--T-T--GG-GC-----GT-A----AA-GA-GC-TC-----G-TA-G-G-C-G-----G--T-TC-G-T-C----- |   |   |   |   |   |    |   |   |   |   |   |   |    |  |
|         | -----GC---G-T-C-T-----G-G-T--G--TG--A-AA-GT--C-C-AT-G-G----CT-T-AA-----C-C-G-T-G-G-A--T-T---G-G--C-G---C-C-----G--GG-T-A--C-----G--G-G--CG--G-G-C---T-G-G-A-G-T--G---C-AG-----TA-G-G-----G-G-A-G--AC-T-----GG--A--ATT---  |   |   |   |   |   |   |     |   |   |   |   |   |                                                                                                                                                |   |   |   |   |   |    |   |   |   |   |   |   |    |  |
|         | C-T-C-G-GT--GT-A-A-CG-GT--G---G--A-A---TG-T-GT-AG--AT-A-TC--G-G--G-A-A-G-A-AC-A-CC---AA--T--G--GC-GAA-G--G-C-A-----G--G-T-C-T---CTG--G--GC-T-G-----T-T---A-C-T--GA--CG-C-T-G--A-GG--A-G-CG-A--AA-G-C---G-TG--GG-          |   |   |   |   |   |   |     |   |   |   |   |   |                                                                                                                                                |   |   |   |   |   |    |   |   |   |   |   |   |    |  |
|         | G--AG-C-G-AA-----CA--GG      Bacteria(100);Actinobacteria(100);Actinobacteria(100);Actinobacteridae(100);Bifidobacteriales(100);Bifidobacteriaceae(100);unclassified(100);unclassified(100);unclassified(100);            |   |   |   |   |   |   |     |   |   |   |   |   |                                                                                                                                                |   |   |   |   |   |    |   |   |   |   |   |   |    |  |
| Otu1789 | 0                                                                                                                                                                                                                         | 0 | 0 | 2 | 0 | 0 | 0 | 1   | 0 | 0 | 0 | 0 | 0 | 0                                                                                                                                              | 0 | 0 | 0 | 0 | 0 | 0  | 0 | 0 | 0 | 0 | 0 | 0 |    |  |
|         | 0                                                                                                                                                                                                                         | 1 | 0 | 0 | 1 | 0 | 0 | 2   | 1 | 0 | 9 | 0 | 0 | 6                                                                                                                                              | 9 | 4 | 2 | 0 | 1 | 58 | 0 | 1 | 3 | 1 | 0 | 0 |    |  |
|         | 0                                                                                                                                                                                                                         | 0 | 0 | 0 | 0 | 0 | 0 | 0   | 0 | 0 | 0 | 0 | 1 | 3                                                                                                                                              | 0 | 1 | 1 | 0 | 0 | 0  | 0 | 0 | 0 | 0 | 5 | 0 |    |  |
|         | 0                                                                                                                                                                                                                         | 1 | 1 | 1 | 0 | 0 | 0 | 0   | 0 | 0 | 0 | 3 | 0 | 1                                                                                                                                              | 0 | 0 | 2 | 0 | 0 | 1  | 0 | 4 | 0 | 0 | 0 | 0 |    |  |
|         | M02255_77_000000000-ADUT3_1_1102_13368_11142                                                                                                                                                                              |   |   |   |   |   |   |     |   |   |   |   |   | T---AC---GT-AG-GTG-----GCA-A-G-----C-G--T--T--AT-C-CGG-AA-----TT-A--T-T--GG-GC-----GT-A----AA-GC-GC-GC-----G-TA-G-G-C-G-----G--T-TT-T-T-T----- |   |   |   |   |   |    |   |   |   |   |   |   |    |  |
|         | -----AA---G-T-C-T-----G-A-T--G--TG--A-AA-GC--C-C-AC-G-G----CT-C-AA-----C-C-G-T-G-G-A--G-----G-GT-C-A---T-T-----G--GA-A-A--C-----T-G-G--AA--A-A-C---T-T-G-A-G-T--G---C-AG-----AA-G-A-----G-G-A-A--AG-T-----GG--A--ATT---C- |   |   |   |   |   |   |     |   |   |   |   |   |                                                                                                                                                |   |   |   |   |   |    |   |   |   |   |   |   |    |  |
|         | C-A-T-GT--GT-A-G-CG-GT--G---A--A-A---TG-C-GC-AG--AG-A-TA--T-G--G-A-G-G-A-AC-A-CC---AG--T--G--GC-GAA-G--G-C-G-----A--C-T-T-T---CTG--G--TC-T-G-----T-A---A-C-T--GA--CG-C-T-G--A-TG--T-G-CG-A--AA-G-C---G-TG--GG-            |   |   |   |   |   |   |     |   |   |   |   |   |                                                                                                                                                |   |   |   |   |   |    |   |   |   |   |   |   |    |  |
|         | -AT-C-A-AA-----CA--GG      Bacteria(100);Firmicutes(100);Bacilli(100);Bacillales(100);Staphylococcaceae(100);Staphylococcus(100);unclassified(100);unclassified(100);unclassified(100);                                   |   |   |   |   |   |   |     |   |   |   |   |   |                                                                                                                                                |   |   |   |   |   |    |   |   |   |   |   |   |    |  |



|                                                                                                                                                                                                                              |    |   |   |   |   |   |    |   |   |    |   |   |                                                                                                                                                                                                                         |   |   |   |   |   |   |    |    |    |   |   |   |   |   |
|------------------------------------------------------------------------------------------------------------------------------------------------------------------------------------------------------------------------------|----|---|---|---|---|---|----|---|---|----|---|---|-------------------------------------------------------------------------------------------------------------------------------------------------------------------------------------------------------------------------|---|---|---|---|---|---|----|----|----|---|---|---|---|---|
| Otu1790                                                                                                                                                                                                                      | 0  | 0 | 0 | 0 | 0 | 0 | 0  | 0 | 0 | 0  | 0 | 1 | 0                                                                                                                                                                                                                       | 0 | 0 | 3 | 0 | 0 | 0 | 0  | 0  | 0  | 0 | 0 | 0 | 0 | 0 |
|                                                                                                                                                                                                                              | 0  | 0 | 0 | 0 | 0 | 0 | 0  | 0 | 0 | 0  | 0 | 0 | 0                                                                                                                                                                                                                       | 0 | 0 | 0 | 0 | 0 | 0 | 0  | 0  | 0  | 0 | 0 | 0 | 0 |   |
|                                                                                                                                                                                                                              | 0  | 0 | 0 | 0 | 0 | 0 | 0  | 0 | 0 | 0  | 0 | 0 | 0                                                                                                                                                                                                                       | 0 | 0 | 0 | 0 | 0 | 0 | 0  | 0  | 0  | 0 | 0 | 0 | 0 |   |
|                                                                                                                                                                                                                              | 0  | 0 | 0 | 0 | 0 | 0 | 0  | 0 | 0 | 0  | 0 | 0 | 0                                                                                                                                                                                                                       | 0 | 0 | 0 | 0 | 0 | 0 | 0  | 0  | 0  | 0 | 0 | 0 | 0 |   |
| M02255_77_000000000-ADUT3_1_1116_12892_16663                                                                                                                                                                                 |    |   |   |   |   |   |    |   |   |    |   |   | T---AA---CC-AG-AAA-----GCC-A-C-----G--G--C--T--AA-C-TAC-GT-----GC-C--A-G--CA-GC-----CG--C---GG-TA-AT-AC-----G-TA-G-G-T-G-----G--C-CA-A-T-T-----                                                                         |   |   |   |   |   |   |    |    |    |   |   |   |   |   |
| -----AA---G-T-C-A-----A-A-T--G--TG--A-AA-TC--C-C-CG-A-G-----CT-T-AA-----C-T-T-G-G-G-A--A-T---T-G--C-A--T--T-----C-GA-T-A--C-----T-G-G--TT--G-G-C---T-A-G-A-G-T--A---T-GG-----GA-G-A-----G-G-A-T---GG-T-----AG--A--ATT---C-   |    |   |   |   |   |   |    |   |   |    |   |   | C-A-G-GT--GT-A-G-CG-GT--G---A--A-A---TG-C-GT-AG--AG-A-TC--T-G--G-A-G-G-A-AT-A-CC---GA--T--G--GC-GAA-G--G-C--A-----G--C-C-A-T---CTG--G--CC-T-A-----A-T---A-C-T--GA--CA-C-T-G--A-GG--T-A-CG-A--AA-G-C---A-TG--GG-G-       |   |   |   |   |   |   |    |    |    |   |   |   |   |   |
| -AG-C-A-AA-----CA--GG                                                                                                                                                                                                        |    |   |   |   |   |   |    |   |   |    |   |   | Bacteria(100);Proteobacteria(100);Gammaproteobacteria(100);Pseudomonadales(100);Moraxellaceae(100);Acinetobacter(100);unclassified(100);unclassified(100);unclassified(100);                                            |   |   |   |   |   |   |    |    |    |   |   |   |   |   |
| Otu1791                                                                                                                                                                                                                      | 0  | 0 | 0 | 1 | 0 | 0 | 0  | 0 | 0 | 0  | 0 | 0 | 0                                                                                                                                                                                                                       | 0 | 0 | 0 | 0 | 0 | 0 | 0  | 0  | 0  | 0 | 0 | 0 | 0 |   |
|                                                                                                                                                                                                                              | 0  | 0 | 0 | 0 | 0 | 0 | 0  | 0 | 0 | 0  | 0 | 0 | 0                                                                                                                                                                                                                       | 2 | 0 | 0 | 0 | 0 | 0 | 0  | 16 | 0  | 0 | 0 | 0 | 0 |   |
|                                                                                                                                                                                                                              | 0  | 0 | 0 | 0 | 0 | 0 | 0  | 0 | 0 | 0  | 0 | 0 | 0                                                                                                                                                                                                                       | 0 | 0 | 0 | 0 | 0 | 0 | 0  | 0  | 0  | 0 | 0 | 0 | 0 |   |
|                                                                                                                                                                                                                              | 0  | 0 | 0 | 1 | 0 | 0 | 0  | 0 | 0 | 0  | 0 | 0 | 0                                                                                                                                                                                                                       | 0 | 0 | 0 | 0 | 0 | 0 | 0  | 0  | 0  | 0 | 0 | 0 | 0 |   |
| M02255_76_000000000-ADUNE_1_2101_6920_8305                                                                                                                                                                                   |    |   |   |   |   |   |    |   |   |    |   |   | A---AA---GC-CA-CGG-----CTA-A-C-----T--A--C--G--TG-C-CAG-CA-----GC-C--G-C--GG-TA-----AT--A---CG-TA-GG-TG-----G-CA-A-G-C-G-----T--TATC-C-G-G-----                                                                         |   |   |   |   |   |   |    |    |    |   |   |   |   |   |
| AAA---G-T-C-T-----G-A-T--G--TG--A-AA-GC--C-C-AC-G-G-----CT-C-AA-----C-C-G-T-G-G-A--G-----G-GT-C-A--T--T-----G-GA-A-A--C-----T--G-G--GA--A-A-C---T-T-G-A-G-T--A--C-AG-----AA-G-A-----G-G-A-A--AG-T-----GG--A--ATT---C-C-      |    |   |   |   |   |   |    |   |   |    |   |   | A-T-GT--GT-A-G-CG-GT--G---A--A-A---TG-C-GC-AG--AG-A-TA--T-G--G-A-G-G-A-AC-A-CC---AG--T--G--GC-GAA-G--G-C--G-----A--C-T-T-T---CTG--G--TC-T-G-----T-A---A-C-T--GA--CG-C-T-G--A-TG--T-G-CG-A--AA-G-C---G-TG--GG-G--        |   |   |   |   |   |   |    |    |    |   |   |   |   |   |
| AT-C-A-AA-----CA--GG                                                                                                                                                                                                         |    |   |   |   |   |   |    |   |   |    |   |   | Bacteria(100);Firmicutes(100);Bacilli(100);Bacillales(100);unclassified(100);unclassified(100);unclassified(100);unclassified(100);unclassified(100);                                                                   |   |   |   |   |   |   |    |    |    |   |   |   |   |   |
| Otu1792                                                                                                                                                                                                                      | 0  | 0 | 0 | 0 | 0 | 0 | 20 | 1 | 0 | 0  | 0 | 0 | 0                                                                                                                                                                                                                       | 0 | 0 | 0 | 0 | 0 | 0 | 0  | 0  | 0  | 0 | 0 | 0 | 0 |   |
|                                                                                                                                                                                                                              | 0  | 0 | 0 | 0 | 0 | 0 | 0  | 0 | 0 | 0  | 0 | 0 | 0                                                                                                                                                                                                                       | 0 | 0 | 0 | 0 | 0 | 0 | 0  | 0  | 0  | 0 | 0 | 0 | 0 |   |
|                                                                                                                                                                                                                              | 0  | 0 | 0 | 0 | 0 | 0 | 0  | 0 | 0 | 0  | 0 | 0 | 0                                                                                                                                                                                                                       | 0 | 0 | 0 | 0 | 0 | 0 | 0  | 0  | 0  | 0 | 0 | 0 | 0 |   |
|                                                                                                                                                                                                                              | 0  | 0 | 0 | 0 | 0 | 0 | 0  | 0 | 0 | 0  | 0 | 0 | 0                                                                                                                                                                                                                       | 0 | 0 | 0 | 0 | 0 | 0 | 0  | 0  | 30 | 0 | 0 | 0 | 0 |   |
| M02255_77_000000000-ADUT3_1_2101_19775_16466                                                                                                                                                                                 |    |   |   |   |   |   |    |   |   |    |   |   | G---AC---GA-AG-GGG-----GCA-A-G-----C--G--T--T--GT-T-CGG-AA-----TT-A--C-T--GG-GC-----GT--A---AA-GG-GC-GC-----G-TA-G-G-C-G-----G--T-TC-T-T-T-----                                                                         |   |   |   |   |   |   |    |    |    |   |   |   |   |   |
| -----AA---G-T-C-A-----G-G-C--G--TG--A-AA-GC--C-C-TG-G-G-----CT-C-AA-----C-C-T-G-G-G-A--G-T---G-G--C-G--C--T-----T-GA-T-A--C-----T--G-G--GG--G-A-C---T-A-G-A-G-A-G---T-GG-----GA-G-A-----G-G-T-T---GG-T-----GG--A--ATT---C-C- |    |   |   |   |   |   |    |   |   |    |   |   | -C-C-C-A-GT--GT-A-G-AG-GT--G---A--A-A---TT-C-GT-AG--AT-A-TT--G-G--G-A-G-A-G-A-AC-A-CC---GG--T--G--GC-GAA-G--G-C--G-----G--C-C-A-A---CTG--G--AC-C-A-----T-T---T-C-T--GA--CG-C-T-G--A-GG--C-G-CG-A--AA-G-C---G-TG--GG-G-- |   |   |   |   |   |   |    |    |    |   |   |   |   |   |
| GG-G--AG-C-A-AA-----CA--GG                                                                                                                                                                                                   |    |   |   |   |   |   |    |   |   |    |   |   | Bacteria(100);Proteobacteria(100);Alphaproteobacteria(100);Rhodospirillales(100);unclassified(100);unclassified(100);unclassified(100);unclassified(100);unclassified(100);                                             |   |   |   |   |   |   |    |    |    |   |   |   |   |   |
| Otu1793                                                                                                                                                                                                                      | 0  | 0 | 0 | 2 | 0 | 0 | 0  | 1 | 0 | 17 | 0 | 7 | 0                                                                                                                                                                                                                       | 0 | 0 | 0 | 0 | 1 | 0 | 0  | 0  | 1  | 0 | 0 | 0 | 0 |   |
|                                                                                                                                                                                                                              | 17 | 0 | 0 | 0 | 0 | 0 | 0  | 0 | 0 | 0  | 0 | 0 | 0                                                                                                                                                                                                                       | 0 | 0 | 0 | 0 | 0 | 0 | 0  | 0  | 0  | 0 | 0 | 0 | 0 |   |
|                                                                                                                                                                                                                              | 0  | 0 | 0 | 0 | 0 | 0 | 0  | 0 | 0 | 0  | 0 | 0 | 0                                                                                                                                                                                                                       | 0 | 0 | 0 | 0 | 0 | 0 | 2  | 0  | 0  | 0 | 1 | 0 | 0 |   |
|                                                                                                                                                                                                                              | 0  | 0 | 0 | 0 | 0 | 0 | 0  | 0 | 0 | 0  | 0 | 0 | 0                                                                                                                                                                                                                       | 0 | 0 | 0 | 0 | 1 | 0 | 11 | 0  | 33 | 0 | 0 | 0 | 0 |   |
| M02255_77_000000000-ADUT3_1_1110_20827_5399                                                                                                                                                                                  |    |   |   |   |   |   |    |   |   |    |   |   | C---TA---AC-TC-TGT-----GCC-A-G-----C---A--G--CC-G-CGG-TA-----AT-A--C-A--GA-GG-----GTG-C---AA-GC-GT-TA-----A-TC-G-GAATT-----A--C-TT-G-A-T-----AA-                                                                        |   |   |   |   |   |   |    |    |    |   |   |   |   |   |
| ---G-T-C-A-----G-A-T--G--TG--A-AA-TC--C-C-CG-G-G-----CT-T-AA-----C-C-T-G-G-G-A--A-C---T-G--C-A--T--C-----T--GA-T-A--C-----T--G-T--TA--G-G-C---T-A-G-A-A-T--A---G-GT-----GA-G-A-----G-G-A-A---GG-T-----AG--A--ATT---C-C-A-G-  |    |   |   |   |   |   |    |   |   |    |   |   | GT--GT-A-G-CG-GT--G---A--A-A---TG-C-GT-AG--AG-A-TC--T-G--G-A-G-G-A-AT-A-CC---GA--T--G--GC-GAA-G--G-C--A-----G--C-C-T-T---CTG--G--CA-T-C-----A-T---A-T-T--GA--CA-C-T-G--A-GG--T-T-CG-A--AA-G-C---G-TG--GG-T--AG-C-       |   |   |   |   |   |   |    |    |    |   |   |   |   |   |
| A-AA-----CA--GG                                                                                                                                                                                                              |    |   |   |   |   |   |    |   |   |    |   |   | Bacteria(100);Proteobacteria(100);Gammaproteobacteria(100);Pseudomonadales(100);Moraxellaceae(100);Psychrobacter(100);unclassified(100);unclassified(100);unclassified(100);                                            |   |   |   |   |   |   |    |    |    |   |   |   |   |   |
| Otu1794                                                                                                                                                                                                                      | 42 | 0 | 0 | 0 | 0 | 0 | 0  | 0 | 0 | 0  | 0 | 0 | 0                                                                                                                                                                                                                       | 0 | 0 | 0 | 0 | 0 | 0 | 0  | 0  | 0  | 0 | 0 | 0 | 0 |   |
|                                                                                                                                                                                                                              | 0  | 0 | 0 | 0 | 0 | 0 | 0  | 0 | 0 | 0  | 0 | 0 | 0                                                                                                                                                                                                                       | 0 | 0 | 0 | 0 | 0 | 0 | 0  | 0  | 0  | 0 | 0 | 0 | 0 |   |
|                                                                                                                                                                                                                              | 0  | 0 | 0 | 0 | 0 | 0 | 0  | 0 | 0 | 0  | 0 | 0 | 0                                                                                                                                                                                                                       | 0 | 0 | 0 | 0 | 0 | 0 | 0  | 0  | 0  | 0 | 0 | 0 | 0 |   |
|                                                                                                                                                                                                                              | 0  | 0 | 0 | 0 | 0 | 0 | 0  | 0 | 0 | 0  | 0 | 0 | 0                                                                                                                                                                                                                       | 0 | 0 | 0 | 0 | 0 | 0 | 0  | 0  | 0  | 0 | 0 | 0 | 0 |   |
| M02255_76_000000000-ADUNE_1_1101_11440_21710                                                                                                                                                                                 |    |   |   |   |   |   |    |   |   |    |   |   | C---GG---CT-AA-CTC-----CGT-G-C-----C--A--G---C--AG-C-CGC-GG-----TA-A--T-A--CG-GA-----GG--A---TC-CA-AG-CG-----T-TA-T-C-C-G-----GA-T-TT-A-T-T-----                                                                        |   |   |   |   |   |   |    |    |    |   |   |   |   |   |
| -----AA---G-T-C-A-----G-A-G--G--TG--A-AA-GG--C-G-GT-A-G-----CT-T-AA-----C-T-A-T-C-G-G--A-G---T-G--C-C--T--T-----T--GA-T-A--C-----T--G-A--TG--A-G-C---T-T-G-A-A-T--G--C-AG-----CT-G-A-----G-G-T-A---GG-C-----GG--A--ATG---T-  |    |   |   |   |   |   |    |   |   |    |   |   | G-A-C-AA--GT-A-G-CG-GT--G---A--A-A---TG-C-AT-AG--AT-A-TG--T-C--A-C-A-G-A-AC-A-CC---GA--T--T--GC-GAA-G--G-C--A-----G--C-T-T-A---CTA--A--AG-T-G-----T-G---A-T-T--GA--CG-C-T-G--A-GG--C-A-CG-A--AA-G-C---G-TG--GG-G--      |   |   |   |   |   |   |    |    |    |   |   |   |   |   |
| -AT-C-A-AA-----CA--GG                                                                                                                                                                                                        |    |   |   |   |   |   |    |   |   |    |   |   | Bacteria(100);Bacteroidetes(100);Sphingobacteria(100);Sphingobacteriales(100);Sphingobacteriaceae(100);unclassified(100);unclassified(100);unclassified(100);unclassified(100);                                         |   |   |   |   |   |   |    |    |    |   |   |   |   |   |



|                                                                                                                                                                                                                         |     |     |     |    |   |    |     |    |     |   |     |    |   |   |   |    |    |   |   |   |   |    |   |     |     |   |   |
|-------------------------------------------------------------------------------------------------------------------------------------------------------------------------------------------------------------------------|-----|-----|-----|----|---|----|-----|----|-----|---|-----|----|---|---|---|----|----|---|---|---|---|----|---|-----|-----|---|---|
| Otu1795                                                                                                                                                                                                                 | 84  | 0   | 0   | 0  | 0 | 0  | 0   | 0  | 0   | 0 | 0   | 0  | 0 | 0 | 0 | 0  | 0  | 0 | 0 | 0 | 0 | 0  | 0 | 0   | 0   | 0 | 0 |
|                                                                                                                                                                                                                         | 0   | 0   | 0   | 0  | 0 | 0  | 0   | 0  | 0   | 0 | 0   | 0  | 0 | 0 | 0 | 0  | 0  | 0 | 0 | 0 | 0 | 0  | 0 | 0   | 0   | 0 | 0 |
|                                                                                                                                                                                                                         | 0   | 0   | 0   | 0  | 0 | 0  | 0   | 0  | 0   | 0 | 0   | 0  | 0 | 0 | 0 | 0  | 0  | 0 | 0 | 0 | 0 | 0  | 0 | 0   | 0   | 0 | 0 |
|                                                                                                                                                                                                                         | 0   | 0   | 0   | 0  | 0 | 0  | 0   | 0  | 0   | 0 | 0   | 0  | 0 | 0 | 0 | 0  | 0  | 0 | 0 | 0 | 0 | 0  | 0 | 0   | 0   | 0 | 0 |
| M02255_77_000000000-ADUT3_1_1111_13590_10367 T---AC--AG-AG-GGC-----CCA-A-G-----C-G-T--T-AA-T-CGG-AA-----TC-A-C-T--GG-GC-----TT-A----AA-GG-GT-GC-----G-CA-G-G-C-G-----G--G-CC-T-G-T-----                                 |     |     |     |    |   |    |     |    |     |   |     |    |   |   |   |    |    |   |   |   |   |    |   |     |     |   |   |
| -----AA---G-T-G-C-----T-T-T-G--TG--A-AA-TC--C-C-AC-T-G-----CT-C-AA-----C-G-G-T-G-G-A-A-T---T-G-C-T---C-G-----G-CA-A-A--C-----T-A-C--AG--G-T-C---T-T-G-A-G-C-C--C-GA-----CA-G-G-----G-G-T-C---AT-C-----GG--A--ACG---C-   |     |     |     |    |   |    |     |    |     |   |     |    |   |   |   |    |    |   |   |   |   |    |   |     |     |   |   |
| T-A-G-GT--GG-A-G-CG-GT--G---A-A-A---TG-C-GT-AG--AT-A-TC--T-A--G-C-G-G-A-AC-G-CC---AA--A--G--GT-GAA-G--A-C--A-----G--A-T-G-A---CTG--G--GT-C-G-----G-C--G-C-T-GA--CG-C-T-C--A-GG--C-A-CG-A--AA-G-C---G-TG--GG-            |     |     |     |    |   |    |     |    |     |   |     |    |   |   |   |    |    |   |   |   |   |    |   |     |     |   |   |
| G--AG-C-A-AA-----CG--GG Bacteria(100);Planctomycetes(100);Phycisphaerae(100);Phycisphaerales(100);Phycisphaeraceae(100);Phycisphaera(100);unclassified(100);unclassified(100);unclassified(100);                        |     |     |     |    |   |    |     |    |     |   |     |    |   |   |   |    |    |   |   |   |   |    |   |     |     |   |   |
| Otu1796                                                                                                                                                                                                                 | 139 | 0   | 0   | 0  | 0 | 0  | 0   | 0  | 0   | 0 | 0   | 0  | 0 | 0 | 0 | 0  | 0  | 0 | 0 | 0 | 0 | 0  | 0 | 0   | 0   | 0 | 0 |
|                                                                                                                                                                                                                         | 1   | 0   | 0   | 0  | 0 | 0  | 0   | 0  | 0   | 0 | 0   | 0  | 0 | 0 | 0 | 0  | 0  | 0 | 0 | 0 | 0 | 0  | 0 | 0   | 0   | 0 | 0 |
|                                                                                                                                                                                                                         | 0   | 0   | 0   | 0  | 0 | 0  | 0   | 0  | 0   | 0 | 0   | 0  | 0 | 0 | 0 | 0  | 0  | 0 | 0 | 0 | 0 | 0  | 0 | 0   | 0   | 0 | 0 |
|                                                                                                                                                                                                                         | 0   | 0   | 0   | 0  | 0 | 0  | 0   | 0  | 0   | 0 | 0   | 0  | 0 | 0 | 0 | 0  | 0  | 0 | 0 | 0 | 0 | 0  | 0 | 0   | 0   | 0 | 0 |
| M02255_77_000000000-ADUT3_1_1101_21442_12746 T---AC--GA-AG-GGG-----GCT-A-G-----C-G-T--T-GC-T-CGG-AA-----TC-A-C-T--GG-GC-----GT-A----AA-GG-GC-GC-----G-TA-G-G-C-G-----G--A-CT-C-T-T-----                                 |     |     |     |    |   |    |     |    |     |   |     |    |   |   |   |    |    |   |   |   |   |    |   |     |     |   |   |
| -----AA---G-T-C-A-----G-A-G-G--TG--A-AA-GC--C-C-AA-G-G-----CT-C-AA-----C-C-T-T-G-G-A-A-T---T-G-C-C---T-T-----T-GA-T-A--C-----T-G-G-GA--G-T-C---T-A-G-A-G-A--C--C-GG-----AA-G-A-----G-G-T-A--AG-T-----GG--A--ACT---      |     |     |     |    |   |    |     |    |     |   |     |    |   |   |   |    |    |   |   |   |   |    |   |     |     |   |   |
| G-C-G-A-GT--GT-A-G-AG-GT--G---A-A-A---TT-C-GT-AG--AT-A-TT--C-G--C-A-A-G-A-AC-A-CC---AG--T--G--GC-GAA-G--G-C--G-----G--C-T-T-A---CTG--G--TC-C-G-----G-T--T-C-T-GA--CG-C-T-G--A-GG--C-G-CG-A--AA-G-C---G-TG--GG-          |     |     |     |    |   |    |     |    |     |   |     |    |   |   |   |    |    |   |   |   |   |    |   |     |     |   |   |
| G--AG-C-A-AA-----CA--GG Bacteria(100);Proteobacteria(100);Alphaproteobacteria(100);Rhizobiales(100);unclassified(100);unclassified(100);unclassified(100);unclassified(100);unclassified(100);                          |     |     |     |    |   |    |     |    |     |   |     |    |   |   |   |    |    |   |   |   |   |    |   |     |     |   |   |
| Otu1797                                                                                                                                                                                                                 | 61  | 236 | 281 | 0  | 0 | 13 | 171 | 39 | 457 | 0 | 0   | 0  | 0 | 0 | 0 | 0  | 0  | 1 | 0 | 0 | 0 | 1  | 0 | 0   | 0   | 0 | 0 |
|                                                                                                                                                                                                                         | 1   | 0   | 6   | 44 | 0 | 0  | 0   | 0  | 0   | 0 | 281 | 13 | 0 | 0 | 0 | 0  | 0  | 0 | 0 | 0 | 0 | 0  | 0 | 0   | 0   | 0 | 0 |
|                                                                                                                                                                                                                         | 0   | 0   | 0   | 0  | 0 | 0  | 0   | 0  | 0   | 0 | 0   | 1  | 0 | 5 | 3 | 0  | 20 | 0 | 0 | 0 | 0 | 0  | 0 | 0   | 111 | 0 | 0 |
|                                                                                                                                                                                                                         | 0   | 30  | 0   | 0  | 0 | 17 | 11  | 5  | 0   | 0 | 53  | 0  | 0 | 0 | 0 | 23 | 0  | 0 | 0 | 0 | 0 | 26 | 4 | 125 | 0   | 0 | 0 |
| M02255_76_000000000-ADUNE_1_1105_12169_5346 T---CG--GC-TA-ACT-----CCG-T-G-----C-C-A--G-CA-G-CCG-CG-----GT-A-A-T--AC-GG-----AG--G-----AT-CC-GA-GC-----GTTA-T-C-C-G-----G--A-TG-TAT-T-----AA-                             |     |     |     |    |   |    |     |    |     |   |     |    |   |   |   |    |    |   |   |   |   |    |   |     |     |   |   |
| ---G-T-C-A-----G-T-T-G--TG--A-AA-GT--T-T-GC-G-G-----CT-C-AA-----C-C-G-T-A-A-A-A-T---T-G--C-A--G-T-----T-GA-T-A--C-----T-G-G-AT--A-T-C---T-T-G-A-G-T-G--C-AG-----TT-G-A-----G-G-C-A--GG-C-----GG--A--ATT---C-G-T-G-      |     |     |     |    |   |    |     |    |     |   |     |    |   |   |   |    |    |   |   |   |   |    |   |     |     |   |   |
| GT--GT-A-G-CG-GT--G---A-A-A---TG-C-TT-AG--AT-A-TC--A-C--G-A-A-G-A-AC-T-CC---GA--T--T--GC-GAA-G--G-C--A-----G--C-C-T-G---CTA--A--GC-T-G-----C-A--A-C-T--GA--CA-T-T-G--A-GG--C-T-CG-A--AA-G-T---G-TG--GG-T--AT-C-         |     |     |     |    |   |    |     |    |     |   |     |    |   |   |   |    |    |   |   |   |   |    |   |     |     |   |   |
| A-AA-----CA--GG Bacteria(100);Bacteroidetes(100);Bacteroidia(100);Bacteroidales(100);Bacteroidaceae(100);Bacteroides(100);unclassified(100);unclassified(100);unclassified(100);                                        |     |     |     |    |   |    |     |    |     |   |     |    |   |   |   |    |    |   |   |   |   |    |   |     |     |   |   |
| Otu1798                                                                                                                                                                                                                 | 0   | 0   | 0   | 0  | 0 | 0  | 0   | 0  | 0   | 0 | 0   | 0  | 0 | 0 | 0 | 0  | 0  | 0 | 0 | 0 | 0 | 0  | 0 | 0   | 0   | 0 | 0 |
|                                                                                                                                                                                                                         | 0   | 0   | 0   | 0  | 0 | 0  | 0   | 0  | 0   | 0 | 0   | 0  | 0 | 0 | 0 | 0  | 0  | 0 | 0 | 0 | 0 | 0  | 0 | 0   | 0   | 0 | 0 |
|                                                                                                                                                                                                                         | 0   | 0   | 0   | 0  | 0 | 0  | 0   | 0  | 0   | 0 | 0   | 0  | 0 | 0 | 0 | 0  | 0  | 0 | 0 | 0 | 3 | 0  | 0 | 0   | 0   | 0 | 0 |
|                                                                                                                                                                                                                         | 0   | 0   | 0   | 0  | 0 | 11 | 0   | 0  | 0   | 0 | 0   | 0  | 0 | 0 | 0 | 0  | 0  | 0 | 0 | 0 | 0 | 0  | 0 | 0   | 0   | 0 | 0 |
| M02255_77_000000000-ADUT3_1_1107_9933_15015 T---AC--GT-AG-GGC-----GCA-A-G-----C-G--T--T-GT-C-CGG-AA-----TT-A-T-T--GG-GC-----GT-A----AA-GA-GC-TC-----G-TA-G-G-C-G-----G--T-CT-G-T-C-----GC-                              |     |     |     |    |   |    |     |    |     |   |     |    |   |   |   |    |    |   |   |   |   |    |   |     |     |   |   |
| ---G-T-C-T-----G-G-T--G--TG--A-AA-TC--C-C-AT-G-G-----CT-C-AA-----C-T-G-T-G-G-G--C-T---T-G--C-A--T--C-----G--GG-T-A--C-----G--G-G-CA--G-A-C---T-A-G-A-G-T-G--C-TG-----TA-G-G-----G-G-A-G--AC-T-----GG--A--ATT---C-C-T-G- |     |     |     |    |   |    |     |    |     |   |     |    |   |   |   |    |    |   |   |   |   |    |   |     |     |   |   |
| GT--GT-A-G-CG-GT--G---G--A-A---TG-C-GC-AG--AT-A-TC--A-G--G-A-G-G-A-AC-A-CC---GA--T--G--GC-GAA-G--G-C--A-----G--G-T-C-T---CTG--G--GC-A-G-----T-T---A-C-T--GA--CG-C-T-G--A-GG--A-G-CG-A--AA-G-C---A-TG--GG-G--AG-         |     |     |     |    |   |    |     |    |     |   |     |    |   |   |   |    |    |   |   |   |   |    |   |     |     |   |   |
| C-G-AA-----CA--GG Bacteria(100);Actinobacteria(100);Actinobacteria(100);Actinobacteridae(100);Actinomycetales(100);Micrococcineae(100);unclassified(100);unclassified(100);unclassified(100);                           |     |     |     |    |   |    |     |    |     |   |     |    |   |   |   |    |    |   |   |   |   |    |   |     |     |   |   |
| Otu1799                                                                                                                                                                                                                 | 0   | 0   | 0   | 0  | 0 | 0  | 0   | 26 | 0   | 0 | 0   | 0  | 0 | 0 | 0 | 0  | 0  | 0 | 0 | 0 | 0 | 0  | 0 | 0   | 0   | 0 | 0 |
|                                                                                                                                                                                                                         | 0   | 0   | 0   | 0  | 0 | 0  | 0   | 6  | 0   | 0 | 0   | 0  | 0 | 0 | 0 | 0  | 0  | 0 | 0 | 0 | 0 | 0  | 0 | 0   | 0   | 0 | 0 |
|                                                                                                                                                                                                                         | 0   | 0   | 0   | 0  | 0 | 0  | 0   | 0  | 0   | 0 | 0   | 0  | 0 | 0 | 0 | 0  | 0  | 0 | 0 | 0 | 0 | 0  | 0 | 0   | 0   | 0 | 0 |
|                                                                                                                                                                                                                         | 0   | 0   | 0   | 0  | 0 | 0  | 0   | 0  | 0   | 0 | 0   | 0  | 0 | 0 | 0 | 0  | 0  | 0 | 0 | 0 | 0 | 0  | 0 | 0   | 0   | 0 | 0 |
| M02255_77_000000000-ADUT3_1_1116_23536_15213 T---AA---GC-AC-CGG-----CTA-A-C-----T--A--C--G--TG-C-CAG-CA-----GC-C--G-C--GG-TA-----AT--A----CG-TA-GG-GT-----G-CA-A-G-C-G-----T--TAAT-C-G-G-----                           |     |     |     |    |   |    |     |    |     |   |     |    |   |   |   |    |    |   |   |   |   |    |   |     |     |   |   |
| -----AA---T-TAC-T-----G-T-T-G--TG--A-AA-TC--C-C-CG-G-G-----CT-T-AA-----C-C-T-G-G-G-A-A-T---G-G--C-A--A-T-----G--GA-G-A--C-----T-G-C-AA--G-G-C---T-A-G-A-G-T-T---T-GG-----CA-G-A-----G-G-G-G--GG-T-----AG--A--ATT---     |     |     |     |    |   |    |     |    |     |   |     |    |   |   |   |    |    |   |   |   |   |    |   |     |     |   |   |
| C-C-A-C-GT--GT-A-G-CA-GT--G---A-A-A---TG-C-GT-AG--AG-A-TG--T-G--G-A-G-G-A-AC-A-CC---GA--T--G--GC-GAA-G--G-C--A-----G--C-C-C-C---CTG--G--GT-C-A-----A-G---A-C-T--GA--CG-C-T-C--A-TG--C-A-CG-A--AA-G-C---G-TG--           |     |     |     |    |   |    |     |    |     |   |     |    |   |   |   |    |    |   |   |   |   |    |   |     |     |   |   |
| GG-G--AG-C-A-AA-----CA--GG Bacteria(100);Proteobacteria(100);Betaproteobacteria(100);Burkholderiales(100);unclassified(100);unclassified(100);unclassified(100);unclassified(100);unclassified(100);                    |     |     |     |    |   |    |     |    |     |   |     |    |   |   |   |    |    |   |   |   |   |    |   |     |     |   |   |



[illegible]
